# Supplementary material for: Physical and Mechanical Properties of Gypsum‐Like Rock Materials
Source: Hindawi journal article supplement (doi:10.1155/2020/3703706), 2020-01-01
Supplement: f1 [file 3703706.f1.zip]

Archive with 9 entries (9 files):
- 3703706.f1/Brazil split test data.xlsx
- 3703706.f1/high temperature triaxial compression test data.xlsx
- 3703706.f1/high temperature uniaxial compression test data.xlsx
- 3703706.f1/Natural triaxial compression test data.xlsx
- 3703706.f1/Natural uniaxial compression test data.xlsx
- 3703706.f1/Original triaxial compression test data.xlsx
- 3703706.f1/Original uniaxial compression test data.xlsx
- 3703706.f1/Saturated triaxial compression test data.xlsx
- 3703706.f1/Saturated uniaxial compression test data.xlsx
