# Supplementary material for: Physical and Mechanical Properties of Gypsum‐Like Rock Materials
Source: Hindawi journal article supplement (doi:10.1155/2020/3703706), 2020-01-01
Supplement: f1 [file 3703706.f1.zip › 3703706.f1/Brazil split test data.xlsx]

## Sheet: E-19
Uniaxial indirect tensile test results report
Binary result file storage path :F:\ Wei Sijiang - Wang Chongyang \ Gypsum E-3-g.U-IT
F:\ Wei Sijiang - Wang Chongyang \ Gypsum E-3-g.t
Start time:	10:47:25,07/02/2019
Specimen type: cylinder	Diameter: 49.8	mm	Height: 28.6	mm
Related sensors:	Vertical force transducer, 100KN (Test piece vertical force
Vertical travel sensor of 50MM (vertical deformation of test parts)
Two horizontal displacement sensors of 2.5mm (lateral deformation of test pieces)
Steps: 1.	Control mode: stroke	Waveform: Slope
Rate: 0.0020	mm/s	Destination: 0.3158	mm
Set no.	Time (ms)	Vertical force (KN)	Vertical deformation (mm)	Transverse deformation (mm)			Axial strain	横向应变
0	0	0	0	0
1	500	0.006	0.00099	0.0001		0.00309278	0.0336735
2	1000	0.018	0.00098	0.0003		0.00927833	0.0333333
3	1500	0.028	0.00198	0.0003		0.014433	0.0673469
4	2000	0.046	0.00396	0.0004		0.0237113	0.134694
5	2500	0.036	0.00397	0.0003		0.0185567	0.135034
6	3000	0.062	0.00495	0.0006		0.0319587	0.168367
7	3500	0.096	0.00692	0.0006		0.0494844	0.235374
8	4000	0.11	0.00691	0.0007		0.0567009	0.235034
9	4500	0.114	0.0079	0.0007		0.0587628	0.268707
10	5000	0.132	0.00889	0.0009		0.0680411	0.302381
11	5500	0.158	0.00987	0.001		0.0814431	0.335714
12	6000	0.176	0.01185	0.0011		0.0907215	0.403061
13	6500	0.194	0.01183	0.0011		0.0999998	0.402381
14	7000	0.212	0.01382	0.0013		0.109278	0.470068
15	7500	0.214	0.01382	0.0013		0.110309	0.470068
16	8000	0.228	0.01581	0.0013		0.117526	0.537755
17	8500	0.258	0.01778	0.0016		0.132989	0.604762
18	9000	0.278	0.01876	0.0018		0.143299	0.638095
19	9500	0.272	0.01877	0.0018		0.140206	0.638435
20	10000	0.266	0.01777	0.0018		0.137113	0.604422
21	10500	0.278	0.01876	0.002		0.143299	0.638095
22	11000	0.276	0.01977	0.0021		0.142268	0.672449
23	11500	0.328	0.02172	0.0023		0.169072	0.738776
24	12000	0.35	0.0237	0.0024		0.180412	0.806122
25	12500	0.362	0.02369	0.0024		0.186598	0.805782
26	13000	0.38	0.02468	0.0026		0.195876	0.839456
27	13500	0.41	0.02565	0.0027		0.21134	0.872449
28	14000	0.424	0.02764	0.0028		0.218556	0.940136
29	14500	0.422	0.02564	0.0029		0.217525	0.872109
30	15000	0.456	0.02961	0.003		0.235051	1.00714
31	15500	0.452	0.02862	0.003		0.232989	0.973469
32	16000	0.42	0.02964	0.0032		0.216494	1.00816
33	16500	0.456	0.03261	0.0034		0.235051	1.10918
34	17000	0.492	0.03258	0.0035		0.253608	1.10816
35	17500	0.52	0.03456	0.0035		0.268041	1.17551
36	18000	0.52	0.03556	0.0035		0.268041	1.20952
37	18500	0.556	0.03553	0.0038		0.286597	1.2085
38	19000	0.5	0.03657	0.0037		0.257731	1.24388
39	19500	0.516	0.03656	0.004		0.265979	1.24354
40	20000	0.594	0.03849	0.0044		0.306185	1.30918
41	20500	0.63	0.04046	0.0043		0.324742	1.37619
42	21000	0.66	0.04244	0.0046		0.340205	1.44354
43	21500	0.704	0.0434	0.0047		0.362886	1.47619
44	22000	0.712	0.04439	0.0048		0.36701	1.50986
45	22500	0.708	0.0444	0.0047		0.364948	1.5102
46	23000	0.726	0.04538	0.0048		0.374226	1.54354
47	23500	0.748	0.04636	0.0049		0.385566	1.57687
48	24000	0.776	0.04634	0.005		0.399999	1.57619
49	24500	0.768	0.04835	0.0051		0.395875	1.64456
50	25000	0.806	0.05031	0.0053		0.415463	1.71122
51	25500	0.712	0.04639	0.0052		0.36701	1.57789
52	26000	0.782	0.04834	0.0053		0.403092	1.64422
53	26500	0.81	0.05031	0.0054		0.417525	1.71122
54	27000	0.806	0.05031	0.0054		0.415463	1.71122
55	27500	0.814	0.05131	0.0055		0.419587	1.74524
56	28000	0.814	0.05331	0.0055		0.419587	1.81327
57	28500	0.842	0.05328	0.0056		0.43402	1.81224
58	29000	0.878	0.05425	0.0058		0.452576	1.84524
59	29500	0.898	0.05524	0.006		0.462886	1.87891
60	30000	0.91	0.05723	0.0059		0.469071	1.9466
61	30500	0.932	0.05721	0.0062		0.480411	1.94592
62	31000	0.942	0.0582	0.0062		0.485566	1.97959
63	31500	0.966	0.06018	0.0064		0.497937	2.04694
64	32000	0.978	0.06017	0.0064		0.504123	2.0466
65	32500	1.028	0.06113	0.0066		0.529896	2.07925
66	33000	1.038	0.06312	0.0067		0.53505	2.14694
67	33500	1.1	0.06506	0.0069		0.567009	2.21293
68	34000	1.086	0.06508	0.007		0.559793	2.21361
69	34500	1.134	0.06704	0.0072		0.584535	2.28027
70	35000	1.132	0.06704	0.0072		0.583504	2.28027
71	35500	1.176	0.068	0.0074		0.606184	2.31293
72	36000	1.146	0.06903	0.0074		0.59072	2.34796
73	36500	1.238	0.07195	0.0078		0.638143	2.44728
74	37000	1.248	0.07194	0.0078		0.643298	2.44694
75	37500	1.26	0.07293	0.008		0.649483	2.48061
76	38000	1.296	0.0749	0.0081		0.66804	2.54762
77	38500	1.282	0.07291	0.0081		0.660823	2.47993
78	39000	1.316	0.07488	0.0082		0.678349	2.54694
79	39500	1.322	0.07688	0.0086		0.681442	2.61497
80	40000	1.302	0.07689	0.0085		0.671133	2.61531
81	40500	1.328	0.07687	0.0086		0.684535	2.61463
82	41000	1.358	0.07785	0.0088		0.699999	2.64796
83	41500	1.406	0.0798	0.0089		0.724741	2.71429
84	42000	1.408	0.0808	0.0091		0.725772	2.7483
85	42500	1.392	0.08082	0.0092		0.717524	2.74898
86	43000	1.506	0.08272	0.0095		0.776287	2.81361
87	43500	1.528	0.0847	0.0096		0.787627	2.88095
88	44000	1.574	0.08566	0.0098		0.811338	2.91361
89	44500	1.608	0.08563	0.0098		0.828864	2.91259
90	45000	1.646	0.0876	0.01		0.848452	2.97959
91	45500	1.568	0.08767	0.0099		0.808246	2.98197
92	46000	1.606	0.08863	0.0101		0.827833	3.01463
93	46500	1.656	0.08959	0.0104		0.853606	3.04728
94	47000	1.656	0.09059	0.0105		0.853606	3.08129
95	47500	1.724	0.09153	0.0107		0.888658	3.11327
96	48000	1.766	0.0935	0.011		0.910307	3.18027
97	48500	1.776	0.09349	0.011		0.915462	3.17993
98	49000	1.79	0.09548	0.011		0.922678	3.24762
99	49500	1.826	0.09545	0.0112		0.941235	3.2466
100	50000	1.83	0.09744	0.0112		0.943297	3.31429
101	50500	1.824	0.09845	0.0112		0.940204	3.34864
102	51000	1.814	0.09846	0.0114		0.93505	3.34898
103	51500	1.832	0.09844	0.0114		0.944328	3.3483
104	52000	1.862	0.10042	0.0115		0.959792	3.41565
105	52500	1.856	0.10142	0.0116		0.956699	3.44966
106	53000	1.952	0.10334	0.0117		1.00618	3.51497
107	53500	2.006	0.10429	0.0118		1.03402	3.54728
108	54000	2.004	0.1043	0.0119		1.03299	3.54762
109	54500	2	0.1053	0.0119		1.03093	3.58163
110	55000	2.046	0.10726	0.0121		1.05464	3.6483
111	55500	2.088	0.10722	0.0121		1.07629	3.64694
112	56000	2.072	0.10724	0.0122		1.06804	3.64762
113	56500	2.094	0.10822	0.0124		1.07938	3.68095
114	57000	2.092	0.11022	0.0126		1.07835	3.74898
115	57500	2.172	0.11115	0.0126		1.11959	3.78061
116	58000	2.164	0.11316	0.0126		1.11546	3.84898
117	58500	2.172	0.11415	0.0127		1.11959	3.88265
118	59000	2.202	0.11313	0.0129		1.13505	3.84796
119	59500	2.246	0.11409	0.0129		1.15773	3.88061
120	60000	2.3	0.11604	0.0131		1.18556	3.94694
121	60500	2.332	0.11602	0.013		1.20206	3.94626
122	61000	2.356	0.121	0.0132		1.21443	4.11565
123	61500	2.326	0.12102	0.0133		1.19897	4.11633
124	62000	2.324	0.11902	0.0133		1.19794	4.0483
125	62500	2.424	0.12094	0.0134		1.24948	4.11361
126	63000	2.472	0.1229	0.0135		1.27422	4.18027
127	63500	2.49	0.12588	0.0134		1.2835	4.28163
128	64000	2.488	0.12488	0.0134		1.28247	4.24762
129	64500	2.534	0.12685	0.0136		1.30618	4.31463
130	65000	2.588	0.1288	0.0136		1.33402	4.38095
131	65500	2.582	0.12781	0.0137		1.33092	4.34728
132	66000	2.606	0.12878	0.0138		1.3433	4.38027
133	66500	2.722	0.13069	0.014		1.40309	4.44524
134	67000	2.716	0.13169	0.0141		1.4	4.47925
135	67500	2.652	0.13175	0.014		1.36701	4.48129
136	68000	2.632	0.13076	0.0139		1.3567	4.44762
137	68500	2.642	0.13175	0.0141		1.36185	4.48129
138	69000	2.65	0.13375	0.014		1.36598	4.54932
139	69500	2.7	0.1357	0.0141		1.39175	4.61565
140	70000	2.734	0.13568	0.0144		1.40928	4.61497
141	70500	2.772	0.13664	0.0144		1.42886	4.64762
142	71000	2.922	0.13852	0.0145		1.50618	4.71156
143	71500	2.882	0.13755	0.0146		1.48556	4.67857
144	72000	2.912	0.13952	0.0146		1.50103	4.74558
145	72500	3.006	0.14044	0.0148		1.54948	4.77687
146	73000	2.998	0.14345	0.0147		1.54536	4.87925
147	73500	2.95	0.14349	0.0148		1.52062	4.88061
148	74000	3.058	0.1444	0.0151		1.57629	4.91156
149	74500	3.014	0.14544	0.0151		1.5536	4.94694
150	75000	3.05	0.14641	0.0151		1.57216	4.97993
151	75500	3.15	0.14632	0.0153		1.62371	4.97687
152	76000	3.174	0.1493	0.0154		1.63608	5.07823
153	76500	3.2	0.15028	0.0153		1.64948	5.11156
154	77000	3.214	0.15027	0.0155		1.6567	5.11122
155	77500	3.384	0.15312	0.0158		1.74433	5.20816
156	78000	3.342	0.15116	0.0157		1.72268	5.1415
157	78500	3.22	0.15326	0.0157		1.65979	5.21293
158	79000	3.128	0.15234	0.0157		1.61237	5.18163
159	79500	3.214	0.15327	0.0157		1.6567	5.21327
160	80000	3.278	0.15521	0.0159		1.68969	5.27925
161	80500	3.438	0.15708	0.0161		1.77216	5.34286
162	81000	3.486	0.15704	0.0162		1.7969	5.3415
163	81500	3.462	0.15806	0.0162		1.78453	5.37619
164	82000	3.53	0.161	0.0162		1.81958	5.47619
165	82500	3.432	0.16008	0.0162		1.76907	5.4449
166	83000	3.484	0.16104	0.0163		1.79587	5.47755
167	83500	3.562	0.16297	0.0165		1.83608	5.5432
168	84000	3.556	0.16098	0.0166		1.83299	5.47551
169	84500	3.642	0.1649	0.0167		1.87732	5.60884
170	85000	3.73	0.16583	0.0168		1.92268	5.64048
171	85500	3.806	0.16776	0.0169		1.96185	5.70612
172	86000	3.84	0.16874	0.017		1.97938	5.73946
173	86500	3.806	0.16876	0.017		1.96185	5.74014
174	87000	3.83	0.16974	0.017		1.97422	5.77347
175	87500	3.822	0.16975	0.0172		1.9701	5.77381
176	88000	3.818	0.17075	0.0172		1.96804	5.80782
177	88500	3.856	0.17172	0.0172		1.98762	5.84082
178	89000	3.854	0.17172	0.0174		1.98659	5.84082
179	89500	3.84	0.17374	0.0174		1.97938	5.90952
180	90000	3.88	0.1737	0.0175		2	5.90816
181	90500	4.022	0.17758	0.0177		2.07319	6.04014
182	91000	4.028	0.17858	0.0177		2.07628	6.07415
183	91500	4.08	0.17753	0.0178		2.10309	6.03844
184	92000	4.062	0.17855	0.0178		2.09381	6.07313
185	92500	4.212	0.18142	0.0182		2.17113	6.17075
186	93000	4.146	0.17948	0.0183		2.13711	6.10476
187	93500	4.138	0.18048	0.0182		2.13299	6.13878
188	94000	4.146	0.18148	0.0183		2.13711	6.17279
189	94500	4.162	0.18346	0.0184		2.14536	6.24014
190	95000	4.39	0.18527	0.0186		2.26288	6.3017
191	95500	4.332	0.18432	0.0186		2.23298	6.26939
192	96000	4.336	0.18631	0.0186		2.23505	6.33707
193	96500	4.374	0.18828	0.0187		2.25463	6.40408
194	97000	4.468	0.1882	0.019		2.30309	6.40136
195	97500	4.468	0.1892	0.0191		2.30309	6.43537
196	98000	4.468	0.1902	0.0191		2.30309	6.46939
197	98500	4.532	0.19115	0.0193		2.33608	6.5017
198	99000	4.588	0.1921	0.0194		2.36494	6.53401
199	99500	4.592	0.1931	0.0194		2.36701	6.56803
200	100000	4.668	0.19503	0.0196		2.40618	6.63367
201	100500	4.698	0.19701	0.0197		2.42164	6.70102
202	101000	4.708	0.197	0.0198		2.4268	6.70068
203	101500	4.728	0.19698	0.0199		2.43711	6.7
204	102000	4.762	0.19795	0.02		2.45463	6.73299
205	102500	4.854	0.19887	0.0201		2.50206	6.76429
206	103000	4.942	0.2028	0.0202		2.54742	6.89796
207	103500	4.892	0.19984	0.0202		2.52164	6.79728
208	104000	4.912	0.20182	0.0203		2.53195	6.86463
209	104500	4.946	0.2038	0.0205		2.54948	6.93197
210	105000	4.964	0.20378	0.0206		2.55876	6.93129
211	105500	4.986	0.20476	0.0207		2.5701	6.96463
212	106000	5.002	0.20575	0.0209		2.57835	6.9983
213	106500	5.084	0.20768	0.0209		2.62061	7.06395
214	107000	5.058	0.2087	0.021		2.60721	7.09864
215	107500	5.016	0.20874	0.021		2.58556	7.1
216	108000	5.224	0.21156	0.0213		2.69278	7.19592
217	108500	5.228	0.21056	0.0213		2.69484	7.1619
218	109000	5.28	0.21251	0.0214		2.72164	7.22823
219	109500	5.272	0.21152	0.0213		2.71752	7.19456
220	110000	5.318	0.21248	0.0214		2.74123	7.22721
221	110500	5.406	0.2154	0.0216		2.78659	7.32653
222	111000	5.468	0.21935	0.0218		2.81855	7.46088
223	111500	5.44	0.21838	0.0218		2.80412	7.42789
224	112000	5.408	0.2164	0.022		2.78762	7.36054
225	112500	5.524	0.2203	0.0222		2.84742	7.4932
226	113000	5.604	0.22024	0.0223		2.88865	7.49116
227	113500	5.494	0.22033	0.0221		2.83195	7.49422
228	114000	5.578	0.22126	0.0222		2.87525	7.52585
229	114500	5.574	0.22426	0.0221		2.87319	7.62789
230	115000	5.618	0.22522	0.0223		2.89587	7.66054
231	115500	5.782	0.22509	0.0225		2.98041	7.65612
232	116000	5.81	0.22806	0.0228		2.99484	7.75714
233	116500	5.87	0.23001	0.0228		3.02577	7.82347
234	117000	5.792	0.22608	0.023		2.98556	7.6898
235	117500	5.888	0.22799	0.023		3.03505	7.75476
236	118000	5.94	0.22895	0.0231		3.06185	7.78741
237	118500	5.962	0.23093	0.0234		3.07319	7.85476
238	119000	5.934	0.22996	0.0234		3.05876	7.82177
239	119500	6.072	0.23484	0.0236		3.12989	7.98776
240	120000	6.034	0.23487	0.0236		3.1103	7.98878
241	120500	6.172	0.23575	0.0237		3.18144	8.01871
242	121000	6.17	0.23676	0.0238		3.18041	8.05306
243	121500	6.12	0.2358	0.0237		3.15463	8.02041
244	122000	6.178	0.23775	0.0238		3.18453	8.08673
245	122500	6.148	0.23777	0.0238		3.16907	8.08741
246	123000	6.238	0.2397	0.0241		3.21546	8.15306
247	123500	6.21	0.24072	0.0244		3.20102	8.18776
248	124000	6.202	0.24373	0.0245		3.1969	8.29014
249	124500	6.27	0.24267	0.0248		3.23195	8.25408
250	125000	6.348	0.2436	0.0247		3.27216	8.28571
251	125500	6.48	0.24649	0.025		3.3402	8.38401
252	126000	6.49	0.24648	0.0251		3.34535	8.38367
253	126500	6.392	0.24557	0.025		3.29484	8.35272
254	127000	6.46	0.24551	0.0251		3.32989	8.35068
255	127500	6.424	0.24654	0.0251		3.31133	8.38571
256	128000	6.592	0.2494	0.0254		3.39793	8.48299
257	128500	6.602	0.24839	0.0255		3.40309	8.44864
258	129000	6.616	0.24938	0.0256		3.4103	8.48231
259	129500	6.696	0.25031	0.0256		3.45154	8.51395
260	130000	6.726	0.25328	0.0257		3.467	8.61497
261	130500	6.886	0.25515	0.0259		3.54948	8.67857
262	131000	6.81	0.25421	0.0259		3.5103	8.6466
263	131500	6.792	0.25423	0.0258		3.50102	8.64728
264	132000	6.81	0.25721	0.0261		3.5103	8.74864
265	132500	6.98	0.26007	0.0262		3.59793	8.84592
266	133000	6.988	0.25906	0.0264		3.60205	8.81156
267	133500	7.058	0.26	0.0264		3.63814	8.84354
268	134000	7.062	0.262	0.0265		3.6402	8.91156
269	134500	7.116	0.26195	0.0267		3.66803	8.90986
270	135000	7.052	0.26401	0.0266		3.63504	8.97993
271	135500	6.888	0.26015	0.0267		3.55051	8.84864
272	136000	6.914	0.26112	0.0268		3.56391	8.88163
273	136500	7.116	0.26595	0.0271		3.66803	9.04592
274	137000	7.03	0.26702	0.0271		3.6237	9.08231
275	137500	7.138	0.26893	0.0273		3.67937	9.14728
276	138000	7.17	0.26791	0.0274		3.69587	9.11259
277	138500	7.322	0.26878	0.0276		3.77422	9.14218
278	139000	7.32	0.26978	0.0276		3.77319	9.17619
279	139500	7.364	0.27174	0.0277		3.79587	9.24286
280	140000	7.426	0.27069	0.0277		3.82783	9.20714
281	140500	7.42	0.27269	0.0278		3.82473	9.27517
282	141000	7.482	0.27364	0.028		3.85669	9.30748
283	141500	7.522	0.27361	0.0279		3.87731	9.30646
284	142000	7.596	0.27854	0.028		3.91546	9.47415
285	142500	7.708	0.27745	0.0282		3.97319	9.43707
286	143000	7.808	0.28136	0.0284		4.02473	9.57007
287	143500	7.75	0.28041	0.0284		3.99484	9.53776
288	144000	7.734	0.28043	0.0285		3.98659	9.53844
289	144500	7.724	0.28143	0.0285		3.98143	9.57245
290	145000	7.808	0.28236	0.0286		4.02473	9.60408
291	145500	7.726	0.28243	0.0287		3.98247	9.60646
292	146000	7.822	0.28435	0.0287		4.03195	9.67177
293	146500	7.9	0.28428	0.0287		4.07216	9.66939
294	147000	7.922	0.28827	0.0287		4.0835	9.8051
295	147500	7.854	0.28532	0.0287		4.04844	9.70476
296	148000	7.872	0.28731	0.0288		4.05772	9.77245
297	148500	8.208	0.28902	0.0291		4.23092	9.83061
298	149000	8.172	0.29005	0.0292		4.21236	9.86565
299	149500	8.132	0.29109	0.0294		4.19174	9.90102
300	150000	8.07	0.29114	0.0294		4.15978	9.90272
301	150500	8.25	0.29399	0.0295		4.25257	9.99966
302	151000	8.172	0.29305	0.0295		4.21236	9.96769
303	151500	8.196	0.29603	0.0296		4.22473	10.069
304	152000	8.238	0.297	0.0297		4.24638	10.102
305	152500	8.264	0.29798	0.0297		4.25978	10.1354
306	153000	8.346	0.29891	0.0298		4.30205	10.167
307	153500	8.338	0.29791	0.0299		4.29793	10.133
308	154000	8.41	0.29985	0.0299		4.33504	10.199
309	154500	8.386	0.30087	0.0301		4.32267	10.2337
310	155000	8.578	0.30271	0.0301		4.42164	10.2963
311	155500	8.434	0.30183	0.0301		4.34741	10.2663
312	156000	8.52	0.30376	0.0301		4.39174	10.332
313	156500	8.622	0.30367	0.0304		4.44432	10.3289
314	157000	8.676	0.30363	0.0305		4.47216	10.3276
315	157500	8.698	0.30961	0.0305		4.4835	10.531
316	158000	8.634	0.30766	0.0305		4.45051	10.4646
317	158500	8.602	0.30769	0.0304		4.43401	10.4656
318	159000	8.648	0.30665	0.0305		4.45772	10.4303
319	159500	8.714	0.30959	0.0306		4.49174	10.5303
320	160000	8.864	0.31147	0.0308		4.56906	10.5942
321	160500	8.854	0.31147	0.0309		4.56391	10.5942
322	160891	5.808	0.31606	0.0472		2.99381	10.7503
323	160893	4.046	0.31756	0.1594		2.08556	10.8014
324	161393	3.848	0.31973	3.2275		1.9835	10.8752
325	161893	3.74	0.32082	3.2274		1.92783	10.9122
326	162393	3.73	0.32183	3.2273		1.92268	10.9466
327	162893	3.792	0.32378	3.228		1.95463	11.0129
328	163393	3.758	0.32381	3.228		1.93711	11.0139

## Sheet: E-20
Uniaxial indirect tensile test results report
Binary result file storage path :F:\ Wei Sijiang - Wang Chongyang \ Gypsum E-3-g.U-IT
F:\ Wei Sijiang - Wang Chongyang \ Gypsum E-3-g.t
Start time:	10:47:25,07/02/2019
Specimen type: cylinder	Diameter: 49.8	mm	Height: 27.9	mm
Related sensors:	Vertical force transducer, 100KN (Test piece vertical force
Vertical travel sensor of 50MM (vertical deformation of test parts)
Two horizontal displacement sensors of 2.5mm (lateral deformation of test pieces)
Steps: 1.	Control mode: stroke	Waveform: Slope
Rate: 0.0020	mm/s	Destination: 0.3235	mm
Set no.	Time (ms)	Vertical force (KN)	Vertical deformation (mm)	Transverse deformation (mm)			Axial strain
0	0	0	0	0		0	0
1	500	0.002	0	-0.0001		0.00102679	0.0358423
2	1000	0	0.001	-0.0002		0	0.0706093
3	1500	0.036	0.00197	-0.0001		0.0184822	0.0709677
4	2000	0.024	0.00198	-0.0001		0.0123215	0.142294
5	2500	0.04	0.00397	0		0.0205358	0.177419
6	3000	0.062	0.00495	0		0.0318305	0.213262
7	3500	0.062	0.00595	0.0001		0.0318305	0.283513
8	4000	0.104	0.00791	0.0001		0.0533931	0.283871
9	4500	0.1	0.00792	0		0.0513395	0.319355
10	5000	0.106	0.00891	0.0001		0.0544198	0.46129
11	5500	0.154	0.01287	0.0003		0.0790628	0.425806
12	6000	0.144	0.01188	0.0003		0.0739288	0.425448
13	6500	0.148	0.01187	0.0002		0.0759824	0.496057
14	7000	0.186	0.01384	0.0003		0.0954914	0.425806
15	7500	0.136	0.01188	0.0002		0.0698217	0.496057
16	8000	0.19	0.01384	0.0003		0.097545	0.5319
17	8500	0.192	0.01484	0.0003		0.0985718	0.567025
18	9000	0.214	0.01582	0.0003		0.109866	0.567384
19	9500	0.202	0.01583	0.0005		0.103706	0.708961
20	10000	0.258	0.01978	0.0005		0.132456	0.638351
21	10500	0.22	0.01781	0.0004		0.112947	0.77957
22	11000	0.292	0.02175	0.0006		0.149911	0.815412
23	11500	0.296	0.02275	0.0006		0.151965	0.779928
24	12000	0.284	0.02176	0.0006		0.145804	0.88638
25	12500	0.318	0.02473	0.0006		0.16326	0.958065
26	13000	0.324	0.02673	0.0006		0.16634	0.887455
27	13500	0.282	0.02476	0.0006		0.144777	0.886738
28	14000	0.304	0.02474	0.0006		0.156072	0.921505
29	14500	0.346	0.02571	0.0007		0.177635	1.09928
30	15000	0.384	0.03067	0.0008		0.197144	1.06452
31	15500	0.354	0.0297	0.0007		0.181742	0.992473
32	16000	0.366	0.02769	0.0007		0.187902	1.09857
33	16500	0.41	0.03065	0.0009		0.210492	1.13441
34	17000	0.416	0.03165	0.001		0.213572	1.31362
35	17500	0.408	0.03665	0.001		0.209465	1.24086
36	18000	0.45	0.03462	0.0011		0.231028	1.31075
37	18500	0.512	0.03657	0.0012		0.262858	1.34624
38	19000	0.52	0.03756	0.0011		0.266965	1.34552
39	19500	0.546	0.03754	0.0012		0.280314	1.41685
40	20000	0.552	0.03953	0.0011		0.283394	1.48781
41	20500	0.576	0.04151	0.0013		0.295715	1.48781
42	21000	0.578	0.04151	0.0013		0.296742	1.52294
43	21500	0.606	0.04249	0.0014		0.311117	1.48853
44	22000	0.554	0.04153	0.0013		0.284421	1.55771
45	22500	0.638	0.04346	0.0015		0.327546	1.70036
46	23000	0.656	0.04744	0.0015		0.336787	1.62903
47	23500	0.65	0.04545	0.0015		0.333707	1.66416
48	24000	0.67	0.04643	0.0015		0.343974	1.73441
49	24500	0.722	0.04839	0.0016		0.370671	1.66452
50	25000	0.662	0.04644	0.0015		0.339867	1.73584
51	25500	0.666	0.04843	0.0016		0.341921	1.77061
52	26000	0.702	0.0494	0.0016		0.360403	1.84229
53	26500	0.712	0.0514	0.0017		0.365537	1.91111
54	27000	0.804	0.05332	0.0019		0.412769	1.91183
55	27500	0.782	0.05334	0.0018		0.401475	2.01828
56	28000	0.812	0.05631	0.0018		0.416877	2.01792
57	28500	0.822	0.0563	0.0019		0.42201	1.9828
58	29000	0.806	0.05532	0.0018		0.413796	1.98351
59	29500	0.78	0.05534	0.0018		0.400448	2.12366
60	30000	0.882	0.05925	0.0021		0.452814	2.22975
61	30500	0.93	0.06221	0.0021		0.477457	2.12401
62	31000	0.866	0.05926	0.0019		0.4446	2.15986
63	31500	0.866	0.06026	0.0019		0.4446	2.15986
64	32000	0.874	0.06026	0.0019		0.448707	2.23047
65	32500	0.906	0.06223	0.0019		0.465136	2.26487
66	33000	0.95	0.06319	0.002		0.487725	2.26487
67	33500	0.954	0.06319	0.0021		0.489779	2.37168
68	34000	0.974	0.06617	0.002		0.500046	2.40645
69	34500	1.008	0.06714	0.0022		0.517502	2.40681
70	35000	1.002	0.06715	0.0022		0.514422	2.51111
71	35500	1.104	0.07006	0.0025		0.566788	2.51039
72	36000	1.128	0.07004	0.0025		0.579109	2.51219
73	36500	1.068	0.07009	0.0024		0.548306	2.58387
74	37000	1.072	0.07209	0.0025		0.550359	2.68925
75	37500	1.138	0.07503	0.0025		0.584243	2.54839
76	38000	1.06	0.0711	0.0023		0.544198	2.65269
77	38500	1.16	0.07401	0.0025		0.595538	2.65269
78	39000	1.164	0.07401	0.0026		0.597592	2.82939
79	39500	1.252	0.07894	0.0029		0.64277	2.82867
80	40000	1.268	0.07892	0.0029		0.650985	2.79319
81	40500	1.262	0.07793	0.0028		0.647904	2.82939
82	41000	1.25	0.07894	0.003		0.641743	2.82832
83	41500	1.278	0.07891	0.0029		0.656119	2.82867
84	42000	1.272	0.07892	0.003		0.653038	2.9724
85	42500	1.26	0.08293	0.0031		0.646877	2.86308
86	43000	1.324	0.07988	0.003		0.679735	3.18351
87	43500	1.394	0.08882	0.0031		0.715672	2.97097
88	44000	1.302	0.08289	0.003		0.66844	3.181
89	44500	1.474	0.08875	0.0035		0.756744	3.00753
90	45000	1.286	0.08391	0.0031		0.660226	3.25591
91	45500	1.368	0.09084	0.0032		0.702324	3.25591
92	46000	1.362	0.09084	0.0032		0.699244	3.22115
93	46500	1.328	0.08987	0.0032		0.681788	3.22222
94	47000	1.3	0.0899	0.0032		0.667413	3.29176
95	47500	1.362	0.09184	0.0032		0.699244	3.18566
96	48000	1.32	0.08888	0.0032		0.677681	3.3595
97	48500	1.498	0.09373	0.0034		0.769065	3.4319
98	49000	1.468	0.09575	0.0033		0.753664	3.4681
99	49500	1.462	0.09676	0.0034		0.750583	3.4681
100	50000	1.464	0.09676	0.0036		0.75161	3.5362
101	50500	1.578	0.09866	0.004		0.810137	3.63907
102	51000	1.728	0.10153	0.0042		0.887146	3.74588
103	51500	1.758	0.10451	0.0045		0.902548	3.74624
104	52000	1.742	0.10452	0.0043		0.894334	3.60609
105	52500	1.64	0.10061	0.004		0.841967	3.74588
106	53000	1.752	0.10451	0.0043		0.899468	3.7828
107	53500	1.724	0.10554	0.0045		0.885093	3.74695
108	54000	1.718	0.10454	0.0043		0.882012	3.8172
109	54500	1.76	0.1065	0.0044		0.903575	3.8172
110	55000	1.77	0.1065	0.0046		0.908709	3.85305
111	55500	1.77	0.1075	0.0047		0.908709	3.85233
112	56000	1.794	0.10748	0.0047		0.92103	3.92366
113	56500	1.802	0.10947	0.0048		0.925137	4.02832
114	57000	1.9	0.11239	0.0052		0.97545	3.99391
115	57500	1.846	0.11143	0.0049		0.947727	4.02867
116	58000	1.88	0.1124	0.005		0.965182	4.0638
117	58500	1.91	0.11338	0.0051		0.980584	4.06272
118	59000	1.942	0.11335	0.0052		0.997013	4.09821
119	59500	1.958	0.11434	0.0054		1.00523	4.16846
120	60000	2.002	0.1163	0.0054		1.02782	4.37778
121	60500	2.188	0.12214	0.006		1.12331	4.34373
122	61000	2.132	0.12119	0.006		1.09456	4.37921
123	61500	2.144	0.12218	0.0058		1.10072	4.37778
124	62000	2.184	0.12214	0.006		1.12125	4.34373
125	62500	2.132	0.12119	0.006		1.09456	4.37957
126	63000	2.126	0.12219	0.0059		1.09148	4.58638
127	63500	2.398	0.12796	0.0065		1.23112	4.51971
128	64000	2.238	0.1261	0.0065		1.14898	4.58889
129	64500	2.316	0.12803	0.0064		1.18902	4.58853
130	65000	2.328	0.12802	0.0064		1.19518	4.62545
131	65500	2.298	0.12905	0.0064		1.17978	4.62545
132	66000	2.294	0.12905	0.0065		1.17773	4.58996
133	66500	2.284	0.12806	0.0064		1.17259	4.65986
134	67000	2.346	0.13001	0.0067		1.20442	4.69606
135	67500	2.332	0.13102	0.0067		1.19724	4.69391
136	68000	2.4	0.13096	0.0068		1.23215	4.76452
137	68500	2.436	0.13293	0.007		1.25063	4.76416
138	69000	2.446	0.13292	0.007		1.25576	4.87204
139	69500	2.434	0.13593	0.0072		1.2496	4.87025
140	70000	2.496	0.13588	0.0077		1.28143	4.86595
141	70500	2.636	0.13576	0.0079		1.35331	4.76344
142	71000	2.47	0.1329	0.0076		1.26809	5.00394
143	71500	2.814	0.13961	0.0083		1.44469	5.00394
144	72000	2.814	0.13961	0.0084		1.44469	5.03799
145	72500	2.87	0.14056	0.0086		1.47344	5.18029
146	73000	2.908	0.14453	0.0085		1.49295	5.14409
147	73500	2.922	0.14352	0.0086		1.50014	5.14409
148	74000	2.914	0.14352	0.0087		1.49603	5.14552
149	74500	2.87	0.14356	0.0088		1.47344	5.21541
150	75000	2.926	0.14551	0.009		1.50219	5.25125
151	75500	2.93	0.14651	0.0091		1.50425	5.24982
152	76000	2.972	0.14647	0.0093		1.52581	5.28566
153	76500	2.976	0.14747	0.0091		1.52786	5.53369
154	77000	3.068	0.15439	0.0092		1.5751	5.32079
155	77500	3.006	0.14845	0.0091		1.54326	5.49642
156	78000	3.114	0.15335	0.0098		1.59871	5.49427
157	78500	3.186	0.15329	0.0101		1.63568	5.49462
158	79000	3.18	0.1533	0.0101		1.6326	5.53011
159	79500	3.19	0.15429	0.0102		1.63773	5.60072
160	80000	3.23	0.15626	0.0103		1.65827	5.59713
161	80500	3.338	0.15616	0.0105		1.71371	5.59821
162	81000	3.302	0.15619	0.0104		1.69523	5.70717
163	81500	3.26	0.15923	0.0105		1.67367	5.77885
164	82000	3.254	0.16123	0.0104		1.67059	5.5638
165	82500	3.256	0.15523	0.0103		1.67161	5.60215
166	83000	3.178	0.1563	0.0104		1.63157	5.92294
167	83500	3.24	0.16525	0.0104		1.6634	6.0595
168	84000	3.462	0.16906	0.0108		1.77737	5.95125
169	84500	3.482	0.16604	0.0109		1.78764	5.98566
170	85000	3.526	0.167	0.011		1.81023	5.81183
171	85500	3.356	0.16215	0.011		1.72295	5.9491
172	86000	3.552	0.16598	0.0115		1.82358	6.16129
173	86500	3.652	0.1719	0.0117		1.87492	6.26918
174	87000	3.64	0.17491	0.0116		1.86876	6.19606
175	87500	3.686	0.17287	0.0117		1.89237	6.26595
176	88000	3.74	0.17482	0.0119		1.9201	6.0957
177	88500	3.442	0.17007	0.0118		1.7671	6.2638
178	89000	3.808	0.17476	0.0121		1.95501	6.34086
179	89500	3.636	0.17691	0.0122		1.8667	6.37706
180	90000	3.626	0.17792	0.0121		1.86157	6.34158
181	90500	3.612	0.17693	0.012		1.85438	6.34588
182	91000	3.476	0.17705	0.0122		1.78456	6.34516
183	91500	3.498	0.17703	0.0125		1.79585	6.48351
184	92000	3.662	0.18089	0.0125		1.88005	6.51792
185	92500	3.702	0.18185	0.0127		1.90059	6.65341
186	93000	3.962	0.18563	0.0136		2.03407	6.58423
187	93500	3.888	0.1837	0.0136		1.99608	6.53871
188	94000	4.196	0.18243	0.0142		2.1542	6.85842
189	94500	4.294	0.19135	0.0143		2.20452	6.60968
190	95000	4.228	0.18441	0.0144		2.17063	6.71362
191	95500	4.336	0.18731	0.0148		2.22608	6.61219
192	96000	4.138	0.18448	0.0146		2.12443	6.74946
193	96500	4.346	0.18831	0.0147		2.23121	6.74875
194	97000	4.364	0.18829	0.0149		2.24045	6.96523
195	97500	4.316	0.19433	0.0151		2.21581	6.81935
196	98000	4.4	0.19026	0.0153		2.25894	6.96237
197	98500	4.408	0.19425	0.0152		2.26304	6.92437
198	99000	4.48	0.19319	0.0156		2.30001	6.99283
199	99500	4.588	0.1951	0.0157		2.35546	6.99355
200	100000	4.562	0.19512	0.0159		2.34211	7.0319
201	100500	4.488	0.19619	0.016		2.30412	7.06631
202	101000	4.53	0.19715	0.0162		2.32568	7.10143
203	101500	4.55	0.19813	0.0163		2.33595	7.1
204	102000	4.604	0.19809	0.0164		2.36367	7.20394
205	102500	4.722	0.20099	0.0166		2.42425	7.16667
206	103000	4.762	0.19995	0.0166		2.44479	7.20323
207	103500	4.742	0.20097	0.0169		2.43452	7.23799
208	104000	4.776	0.20194	0.0169		2.45197	7.30717
209	104500	4.86	0.20387	0.0171		2.4951	7.23799
210	105000	4.772	0.20194	0.0171		2.44992	7.44516
211	105500	5.038	0.20772	0.0175		2.58648	7.51792
212	106000	4.998	0.20975	0.0175		2.56595	7.59176
213	106500	4.926	0.21181	0.0175		2.52898	7.4172
214	107000	4.776	0.20694	0.0174		2.45197	7.62975
215	107500	4.858	0.21287	0.0174		2.49407	7.45018
216	108000	4.874	0.20786	0.0176		2.50229	7.51541
217	108500	5.088	0.20968	0.018		2.61215	7.58459
218	109000	5.162	0.21161	0.0185		2.65014	7.79606
219	109500	5.288	0.21751	0.0187		2.71483	7.72509
220	110000	5.26	0.21553	0.0189		2.70046	7.76057
221	110500	5.276	0.21652	0.0188		2.70867	7.76022
222	111000	5.288	0.21651	0.019		2.71483	7.79355
223	111500	5.36	0.21744	0.0191		2.7518	7.8276
224	112000	5.424	0.21839	0.0194		2.78465	7.86237
225	112500	5.456	0.21936	0.0196		2.80108	7.89892
226	113000	5.438	0.22038	0.0196		2.79184	7.96989
227	113500	5.46	0.22236	0.0198		2.80314	8.00358
228	114000	5.528	0.2233	0.0201		2.83805	8.00358
229	114500	5.528	0.2233	0.0202		2.83805	8.03943
230	115000	5.532	0.2243	0.0203		2.8401	8.04014
231	115500	5.51	0.22432	0.0203		2.82881	8.00466
232	116000	5.494	0.22333	0.0205		2.82059	8.03835
233	116500	5.564	0.22427	0.0205		2.85653	8.28423
234	117000	5.726	0.23113	0.0207		2.9397	8.32007
235	117500	5.732	0.23213	0.0208		2.94278	8.2871
236	118000	5.634	0.23121	0.0209		2.89247	8.42724
237	118500	5.736	0.23512	0.0209		2.94483	8.31111
238	119000	6.024	0.23188	0.0217		3.09269	8.35556
239	119500	5.742	0.23312	0.0221		2.94791	8.38853
240	120000	5.834	0.23404	0.0224		2.99515	8.41935
241	120500	6	0.2349	0.0224		3.08037	8.38996
242	121000	5.792	0.23408	0.0222		2.97358	8.38853
243	121500	5.836	0.23404	0.0221		2.99617	8.45878
244	122000	5.886	0.236	0.0224		3.02184	8.42366
245	122500	5.86	0.23502	0.0225		3.00849	8.59355
246	123000	6.17	0.23976	0.0231		3.16765	8.59677
247	123500	6.056	0.23985	0.0232		3.10912	8.59964
248	124000	5.97	0.23993	0.0232		3.06497	8.78029
249	124500	5.922	0.24497	0.0232		3.04032	8.76738
250	125000	6.342	0.24461	0.0241		3.25595	8.84946
251	125500	6.006	0.2469	0.0235		3.08345	8.83656
252	126000	6.42	0.24654	0.0247		3.29599	8.8043
253	126500	6.306	0.24564	0.0246		3.23747	8.87563
254	127000	6.316	0.24763	0.0247		3.2426	8.80824
255	127500	6.182	0.24575	0.0247		3.17381	8.87634
256	128000	6.29	0.24765	0.0248		3.22925	8.97885
257	128500	6.454	0.25051	0.0251		3.31345	9.01111
258	129000	6.58	0.25141	0.0252		3.37814	9.08065
259	129500	6.642	0.25335	0.0253		3.40997	8.97921
260	130000	6.448	0.25052	0.0253		3.31037	9.08208
261	130500	6.602	0.25339	0.0256		3.38943	9.08459
262	131000	6.522	0.25346	0.0256		3.34836	9.08029
263	131500	6.654	0.25334	0.0256		3.41613	9.26308
264	132000	6.536	0.25844	0.0257		3.35555	9.22616
265	132500	6.576	0.25741	0.026		3.37608	9.46882
266	133000	6.842	0.26418	0.0261		3.51265	9.54516
267	133500	6.7	0.26631	0.0263		3.43974	9.50645
268	134000	6.792	0.26523	0.0262		3.48698	9.39928
269	134500	6.78	0.26224	0.0263		3.48082	9.29176
270	135000	6.772	0.25924	0.0263		3.47671	9.64409
271	135500	6.972	0.26907	0.0268		3.57939	9.53333
272	136000	7.088	0.26598	0.0268		3.63894	9.64552
273	136500	6.93	0.26911	0.0271		3.55783	9.681
274	137000	6.946	0.2701	0.0276		3.56604	9.71577
275	137500	6.976	0.27107	0.0279		3.58144	9.6871
276	138000	6.74	0.27027	0.0275		3.46028	9.63871
277	138500	7.152	0.26892	0.0282		3.6718	9.78315
278	139000	7.124	0.27295	0.0285		3.65742	9.70753
279	139500	7.248	0.27084	0.0284		3.72109	9.67312
280	140000	7.202	0.26988	0.0285		3.69747	9.8448
281	140500	7.45	0.27467	0.0293		3.82479	9.84731
282	141000	7.364	0.27474	0.0295		3.78064	9.81183
283	141500	7.348	0.27375	0.0296		3.77242	9.91685
284	142000	7.438	0.27668	0.0297		3.81863	9.98674
285	142500	7.5	0.27863	0.0298		3.85046	9.91434
286	143000	7.516	0.27661	0.0297		3.85868	10.0201
287	143500	7.572	0.27956	0.03		3.88743	9.88315
288	144000	7.36	0.27574	0.03		3.77859	10.1939
289	144500	7.758	0.28441	0.0303		3.98292	10.2681
290	145000	7.674	0.28648	0.0304		3.93979	10.2706
291	145500	7.586	0.28655	0.0305		3.89461	9.9871
292	146000	7.482	0.27864	0.0304		3.84122	10.1631
293	146500	7.594	0.28355	0.0305		3.89872	10.4441
294	147000	7.782	0.29139	0.0306		3.99524	10.4452
295	147500	7.738	0.29142	0.0307		3.97265	10.128
296	148000	7.57	0.28257	0.0306		3.8864	10.3409
297	148500	7.64	0.28851	0.0309		3.92234	10.5136
298	149000	7.846	0.29333	0.0314		4.0281	10.5122
299	149500	7.898	0.29329	0.0312		4.05479	10.338
300	150000	7.732	0.28843	0.0311		3.96957	10.5491
301	150500	7.856	0.29432	0.0312		4.03323	10.5849
302	151000	7.854	0.29532	0.0316		4.0322	10.4394
303	151500	7.934	0.29126	0.0317		4.07327	10.5878
304	152000	7.764	0.2954	0.032		3.986	10.7921
305	152500	8.114	0.3011	0.0324		4.16569	10.7301
306	153000	7.802	0.29937	0.0322		4.00551	10.6588
307	153500	7.794	0.29738	0.0322		4.0014	10.7294
308	154000	7.82	0.29935	0.0323		4.01475	10.7946
309	154500	8.032	0.30117	0.0324		4.12359	10.8649
310	155000	8.078	0.30313	0.0325		4.1472	10.8989
311	155500	8.136	0.30408	0.0327		4.17698	10.9011
312	156000	8.066	0.30414	0.0329		4.14104	11.0022
313	156500	8.28	0.30696	0.0333		4.25091	10.9
314	157000	8.102	0.30411	0.0331		4.15952	11.0054
315	157500	8.174	0.30705	0.0335		4.19649	11.0391
316	158000	8.242	0.30799	0.0337		4.2314	11.0735
317	158500	8.296	0.30895	0.0339		4.25912	11.1093
318	159000	8.3	0.30995	0.034		4.26118	11.143
319	159500	8.362	0.31089	0.0341		4.29301	11.1778
320	160000	8.406	0.31186	0.0344		4.3156	11.0283
321	160500	8.604	0.30769	0.0346		4.41725	11.2129
322	161000	8.422	0.31284	0.035		4.32381	11.4595
323	161322	6.208	0.31972	0.0406		3.18715	11.5484
324	161324	4.476	0.3222	0.0768		2.29795	11.447
325	161824	4.274	0.31937	1.9248		2.19425	11.4559
326	162324	3.978	0.31962	1.9235		2.04228	11.524
327	162824	4.092	0.32152	1.9246		2.10081	11.7004
328	163324	4.194	0.32644	1.9281		2.15318	11.6244
329	163824	4.334	0.32432	1.9301		2.22505	11.5939
330	164324	4.154	0.32347	1.9309		2.13264	0

## Sheet: E-21
Uniaxial indirect tensile test results report
Binary result file storage path :F:\ Wei Sijiang - Wang Chongyang \ Gypsum E-3-g.U-IT
F:\ Wei Sijiang - Wang Chongyang \ Gypsum E-3-g.t
Start time:	10:47:25,07/02/2019
Specimen type: cylinder	Diameter: 49.8	mm	Height: 28.3	mm
Related sensors:	Vertical force transducer, 100KN (Test piece vertical force
Vertical travel sensor of 50MM (vertical deformation of test parts)
Two horizontal displacement sensors of 2.5mm (lateral deformation of test pieces)
Steps: 1.	Control mode: stroke	Waveform: Slope
Rate: 0.0020	mm/s	Destination: 0.3235	mm
Set no.	Time (ms)	Vertical force (KN)	Vertical deformation (mm)	Transverse deformation (mm)			Axial strain
0	0	0	0	0		0	0
1	502	0	0	0.0001		0	0.1053
2	1002	0.02	0.00298	0.0001		0.0102679	0.140989
3	1502	0.016	0.00399	0		0.00821432	0.104947
4	2002	0.032	0.00297	0.0001		0.0164286	0.10424
5	2502	0.054	0.00295	0.0002		0.0277233	0.174205
6	3002	0.078	0.00493	0.0002		0.0400448	0.243816
7	3502	0.118	0.0069	0.0003		0.0605806	0.278799
8	4002	0.126	0.00789	0.0003		0.0646877	0.278445
9	4502	0.136	0.00788	0.0003		0.0698217	0.313428
10	5002	0.158	0.00887	0.0003		0.0811164	0.34841
11	5502	0.16	0.00986	0.0004		0.0821432	0.418728
12	6002	0.182	0.01185	0.0004		0.0934378	0.453357
13	6502	0.206	0.01283	0.0004		0.105759	0.453357
14	7002	0.204	0.01283	0.0004		0.104733	0.487986
15	7502	0.228	0.01381	0.0005		0.117054	0.524028
16	8002	0.206	0.01483	0.0005		0.105759	0.558304
17	8502	0.232	0.0158	0.0006		0.119108	0.558304
18	9002	0.236	0.0158	0.0005		0.121161	0.557244
19	9502	0.27	0.01577	0.0006		0.138617	0.662898
20	10002	0.286	0.01876	0.0006		0.146831	0.732509
21	10502	0.32	0.02073	0.0007		0.164286	0.767845
22	11002	0.322	0.02173	0.0007		0.165313	0.732509
23	11502	0.318	0.02073	0.0007		0.16326	0.732509
24	12002	0.322	0.02073	0.0007		0.165313	0.907774
25	12502	0.368	0.02569	0.0008		0.188929	0.837456
26	13002	0.352	0.0237	0.0009		0.180715	0.906714
27	13502	0.4	0.02566	0.0009		0.205358	0.977739
28	14002	0.384	0.02767	0.0009		0.197144	0.906714
29	14502	0.404	0.02566	0.001		0.207411	1.04664
30	15002	0.452	0.02962	0.001		0.232054	1.11943
31	15502	0.372	0.03168	0.0009		0.190983	1.15442
32	16002	0.388	0.03267	0.0009		0.199197	1.08339
33	16502	0.398	0.03066	0.0009		0.204331	1.18622
34	17002	0.506	0.03357	0.0012		0.259778	1.1159
35	17502	0.5	0.03158	0.0011		0.256697	1.11661
36	18002	0.466	0.0316	0.0011		0.239242	1.21979
37	18502	0.56	0.03452	0.0013		0.287501	1.25548
38	19002	0.558	0.03553	0.0012		0.286474	1.22191
39	19502	0.5	0.03458	0.0011		0.256697	1.36007
40	20002	0.604	0.03849	0.0013		0.31009	1.35972
41	20502	0.614	0.03848	0.0014		0.315224	1.46502
42	21002	0.634	0.04146	0.0014		0.325492	1.46537
43	21502	0.626	0.04147	0.0014		0.321385	1.46537
44	22002	0.628	0.04147	0.0014		0.322412	1.53604
45	22502	0.62	0.04347	0.0013		0.318305	1.53569
46	23002	0.638	0.04346	0.0014		0.327546	1.57032
47	23502	0.658	0.04444	0.0014		0.337814	1.60495
48	24002	0.688	0.04542	0.0015		0.353216	1.63958
49	24502	0.706	0.0464	0.0014		0.362457	1.70954
50	25002	0.732	0.04838	0.0016		0.375805	1.77915
51	25502	0.766	0.05035	0.0015		0.39326	1.70883
52	26002	0.756	0.04836	0.0016		0.388126	1.88233
53	26502	0.854	0.05327	0.0018		0.438439	1.88304
54	27002	0.836	0.05329	0.0017		0.429198	1.91696
55	27502	0.88	0.05425	0.0018		0.451787	1.88339
56	28002	0.826	0.0533	0.0018		0.424064	1.98763
57	28502	0.886	0.05625	0.0018		0.454868	1.91908
58	29002	0.812	0.05431	0.0017		0.416877	1.91731
59	29502	0.87	0.05426	0.0017		0.446653	1.98657
60	30002	0.922	0.05622	0.0018		0.47335	2.02367
61	30502	0.86	0.05727	0.0018		0.441519	2.12686
62	31002	0.948	0.06019	0.0019		0.486698	2.19894
63	31502	0.904	0.06223	0.0019		0.464109	2.16148
64	32002	0.978	0.06117	0.0019		0.5021	2.19576
65	32502	1.016	0.06214	0.002		0.521609	2.19576
66	33002	1.014	0.06214	0.002		0.520582	2.33428
67	33502	1.104	0.06606	0.0021		0.566788	2.33498
68	34002	1.078	0.06608	0.0022		0.55344	2.36961
69	34502	1.104	0.06706	0.0021		0.566788	2.37138
70	35002	1.044	0.06711	0.0021		0.535984	2.51201
71	35502	1.07	0.07109	0.0021		0.549332	2.5106
72	36002	1.118	0.07105	0.0021		0.573975	2.547
73	36502	1.078	0.07208	0.0021		0.55344	2.54735
74	37002	1.076	0.07209	0.0021		0.552413	2.58233
75	37502	1.088	0.07308	0.0021		0.558574	2.50919
76	38002	1.166	0.07101	0.0021		0.598618	2.75583
77	38502	1.184	0.07799	0.0022		0.607859	2.72191
78	39002	1.146	0.07703	0.0021		0.58835	2.82509
79	39502	1.236	0.07995	0.0023		0.634556	2.79011
80	40002	1.222	0.07896	0.0023		0.627368	2.75689
81	40502	1.15	0.07802	0.0023		0.590404	2.75336
82	41002	1.27	0.07792	0.0023		0.652011	2.7894
83	41502	1.252	0.07894	0.0023		0.64277	2.89329
84	42002	1.322	0.08188	0.0025		0.678708	2.96396
85	42502	1.322	0.08388	0.0025		0.678708	3.0318
86	43002	1.414	0.0858	0.0029		0.72594	2.96608
87	43502	1.246	0.08394	0.0024		0.63969	3.13675
88	44002	1.45	0.08877	0.0027		0.744422	2.89187
89	44502	1.366	0.08184	0.0027		0.701297	3.13604
90	45002	1.47	0.08875	0.0027		0.75469	3.17279
91	45502	1.424	0.08979	0.0029		0.731074	3.03074
92	46002	1.442	0.08577	0.0029		0.740315	3.2417
93	46502	1.486	0.09174	0.003		0.762905	3.20424
94	47002	1.55	0.09068	0.003		0.795762	3.27527
95	47502	1.542	0.09269	0.003		0.791655	3.23746
96	48002	1.624	0.09162	0.0034		0.833753	3.34417
97	48502	1.606	0.09464	0.0032		0.824512	3.37668
98	49002	1.694	0.09556	0.0034		0.869691	3.44346
99	49502	1.824	0.09745	0.0035		0.936432	3.48269
100	50002	1.692	0.09856	0.0034		0.868664	3.51979
101	50502	1.64	0.09961	0.0032		0.841967	3.51908
102	51002	1.662	0.09959	0.0034		0.853262	3.47951
103	51502	1.8	0.09847	0.0038		0.924111	3.51943
104	52002	1.652	0.0996	0.0035		0.848128	3.55194
105	52502	1.738	0.10052	0.0034		0.89228	3.58799
106	53002	1.722	0.10154	0.0035		0.884066	3.69223
107	53502	1.774	0.10449	0.0035		0.910762	3.76219
108	54002	1.806	0.10647	0.0037		0.927191	3.79541
109	54502	1.87	0.10741	0.0038		0.960048	3.82862
110	55002	1.94	0.10835	0.0041		0.995986	3.79364
111	55502	1.928	0.10736	0.004		0.989825	3.89894
112	56002	1.958	0.11034	0.0041		1.00523	3.86502
113	56502	1.912	0.10938	0.0041		0.981611	3.89859
114	57002	1.962	0.11033	0.0042		1.00728	3.9
115	57502	1.916	0.11037	0.0042		0.983664	4.1053
116	58002	2.14	0.11618	0.0045		1.09866	4.07208
117	58502	2.072	0.11524	0.0045		1.06375	4.00106
118	59002	2.08	0.11323	0.0046		1.06786	4.1424
119	59502	2.088	0.11723	0.0046		1.07197	4.10671
120	60002	2.098	0.11622	0.0047		1.0771	4.14099
121	60502	2.128	0.11719	0.0046		1.0925	4.17527
122	61002	2.166	0.11816	0.0048		1.11201	4.21025
123	61502	2.172	0.11915	0.0048		1.11509	4.24594
124	62002	2.166	0.12016	0.0049		1.11201	4.24523
125	62502	2.186	0.12014	0.005		1.12228	4.34982
126	63002	2.234	0.1231	0.0051		1.14692	4.27739
127	63502	2.294	0.12105	0.0052		1.17773	4.38233
128	64002	2.332	0.12402	0.0052		1.19724	4.45265
129	64502	2.336	0.12601	0.0053		1.19929	4.453
130	65002	2.334	0.12602	0.0054		1.19826	4.48799
131	65502	2.342	0.12701	0.0055		1.20237	4.5576
132	66002	2.378	0.12898	0.0056		1.22085	4.55053
133	66502	2.612	0.12878	0.0059		1.34099	4.65406
134	67002	2.692	0.13171	0.0061		1.38206	4.58622
135	67502	2.602	0.12979	0.0061		1.33585	4.65654
136	68002	2.61	0.13178	0.0063		1.33996	4.68834
137	68502	2.726	0.13268	0.0063		1.39951	4.93392
138	69002	2.784	0.13963	0.0065		1.42929	4.79152
139	69502	2.828	0.1356	0.0066		1.45188	4.72473
140	70002	2.694	0.13371	0.0066		1.38309	4.93498
141	70502	2.75	0.13966	0.0066		1.41184	4.86325
142	71002	2.79	0.13763	0.0068		1.43237	4.86219
143	71502	2.824	0.1376	0.0069		1.44983	4.89611
144	72002	2.87	0.13856	0.0069		1.47344	4.93145
145	72502	2.872	0.13956	0.0072		1.47447	5.00035
146	73002	2.926	0.14151	0.0072		1.50219	5.03569
147	73502	2.93	0.14251	0.0073		1.50425	5.06961
148	74002	2.978	0.14347	0.0074		1.52889	5.06855
149	74502	3.018	0.14344	0.0075		1.54943	5.13781
150	75002	3.054	0.1454	0.0076		1.56791	5.06926
151	75502	2.986	0.14346	0.0075		1.533	5.17138
152	76002	3.118	0.14635	0.0078		1.60076	5.24134
153	76502	3.146	0.14833	0.0078		1.61514	5.27668
154	77002	3.142	0.14933	0.008		1.61309	5.34594
155	77502	3.188	0.15129	0.0081		1.6367	5.38021
156	78002	3.226	0.15226	0.0082		1.65621	5.41413
157	78502	3.27	0.15322	0.0083		1.6788	5.41272
158	79002	3.32	0.15318	0.0084		1.70447	5.4841
159	79502	3.29	0.1552	0.0085		1.68907	5.48233
160	80002	3.35	0.15515	0.0086		1.71987	5.48127
161	80502	3.384	0.15512	0.0086		1.73733	5.51661
162	81002	3.39	0.15612	0.0086		1.74041	5.69399
163	81502	3.37	0.16114	0.0089		1.73014	5.61908
164	82002	3.512	0.15902	0.0095		1.80304	5.65477
165	82502	3.492	0.16003	0.0096		1.79277	5.72438
166	83002	3.526	0.162	0.0097		1.81023	5.75936
167	83502	3.538	0.16299	0.0099		1.81639	5.79187
168	84002	3.636	0.16391	0.01		1.8667	5.79152
169	84502	3.65	0.1639	0.0101		1.87389	5.85936
170	85002	3.738	0.16582	0.0101		1.91907	5.79258
171	85502	3.612	0.16393	0.0101		1.85438	5.92968
172	86002	3.752	0.16781	0.0103		1.92626	5.96608
173	86502	3.724	0.16884	0.0105		1.91188	6.10459
174	87002	3.81	0.17276	0.0106		1.95603	5.99894
175	87502	3.806	0.16977	0.0107		1.95398	6.03357
176	88002	3.83	0.17075	0.0108		1.9663	6.00035
177	88502	3.752	0.16981	0.0106		1.92626	6.10071
178	89002	3.944	0.17265	0.0109		2.02483	6.0689
179	89502	3.826	0.17175	0.0109		1.96425	6.20671
180	90002	3.94	0.17565	0.0112		2.02278	6.07032
181	90502	3.776	0.17179	0.011		1.93858	6.27491
182	91002	4.026	0.17758	0.0114		2.06693	6.24134
183	91502	3.97	0.17663	0.0113		2.03818	6.23993
184	92002	4.012	0.17659	0.0115		2.05974	6.24064
185	92502	3.984	0.17661	0.0115		2.04536	6.27562
186	93002	3.998	0.1776	0.0114		2.05255	6.6212
187	93502	4.264	0.18738	0.012		2.18912	6.55866
188	94002	3.984	0.18561	0.0118		2.04536	6.55194
189	94502	4.21	0.18542	0.012		2.16139	6.6576
190	95002	4.226	0.18841	0.0121		2.16961	6.65371
191	95502	4.354	0.1883	0.0125		2.23532	6.58657
192	96002	4.24	0.1864	0.0124		2.17679	6.62085
193	96502	4.27	0.18737	0.0125		2.1922	6.68622
194	97002	4.448	0.18922	0.0126		2.28358	6.65548
195	97502	4.298	0.18835	0.0126		2.20657	6.72261
196	98002	4.412	0.19025	0.0127		2.2651	6.75618
197	98502	4.47	0.1912	0.0127		2.29487	6.85901
198	99002	4.58	0.19411	0.013		2.35135	6.89541
199	99502	4.54	0.19514	0.0132		2.33081	6.75936
200	100002	4.366	0.19129	0.0131		2.24148	6.92827
201	100502	4.62	0.19607	0.0134		2.37188	6.89788
202	101002	4.464	0.19521	0.0133		2.29179	6.99682
203	101502	4.694	0.19801	0.0135		2.40988	7.06466
204	102002	4.792	0.19993	0.0137		2.46019	7.06608
205	102502	4.742	0.19997	0.0137		2.43452	6.96396
206	103002	4.612	0.19708	0.0135		2.36778	7.04488
207	103502	4.276	0.19937	0.0134		2.19528	7.04488
208	104002	4.276	0.19937	0.0134		2.19528	7.2212
209	104502	4.284	0.20436	0.0136		2.19938	7.20671
210	105002	4.76	0.20395	0.0143		2.44376	7.27314
211	105502	4.904	0.20583	0.0145		2.51769	7.27244
212	106002	4.932	0.20581	0.0146		2.53206	7.3106
213	106502	4.84	0.20689	0.0147		2.48483	7.38269
214	107002	4.784	0.20893	0.0149		2.45608	7.48198
215	107502	5.018	0.21174	0.0149		2.57621	7.41449
216	108002	4.912	0.20983	0.0149		2.5218	7.73004
217	108502	4.984	0.21876	0.0151		2.55876	7.34841
218	109002	4.756	0.20796	0.0151		2.44171	7.58834
219	109502	4.998	0.21475	0.0153		2.56595	7.79788
220	110002	5.082	0.22068	0.0152		2.60907	7.48092
221	110502	5.044	0.21171	0.0154		2.58956	7.6841
222	111002	5.344	0.21746	0.0159		2.74358	7.72155
223	111502	5.272	0.21852	0.016		2.70662	7.75371
224	112002	5.38	0.21943	0.016		2.76206	7.89505
225	112502	5.382	0.22343	0.016		2.76309	7.68728
226	113002	5.232	0.21755	0.0161		2.68608	8.03534
227	113502	5.408	0.2274	0.0161		2.77644	7.75724
228	114002	5.26	0.21953	0.0162		2.70046	7.75477
229	114502	5.342	0.21946	0.0162		2.74255	7.89081
230	115002	5.524	0.22331	0.0164		2.83599	7.99329
231	115502	5.638	0.22621	0.0167		2.89452	8.06466
232	116002	5.608	0.22823	0.0168		2.87912	7.99364
233	116502	5.628	0.22622	0.0168		2.88939	7.9947
234	117002	5.584	0.22625	0.0169		2.8668	8.27279
235	117502	5.742	0.23412	0.0171		2.94791	8.03039
236	118002	5.578	0.22726	0.017		2.86372	8.06113
237	118502	5.728	0.22813	0.0171		2.94073	8.16643
238	119002	5.752	0.23111	0.0172		2.95305	8.23357
239	119502	5.868	0.23301	0.0174		3.0126	8.30283
240	120002	5.92	0.23497	0.0174		3.0393	8.30177
241	120502	5.952	0.23494	0.0177		3.05573	8.30318
242	121002	5.906	0.23498	0.0176		3.03211	8.58551
243	121502	5.922	0.24297	0.0177		3.04032	8.34558
244	122002	5.666	0.23618	0.0176		2.90889	8.37809
245	122502	5.77	0.2371	0.0176		2.96229	8.61696
246	123002	6.052	0.24386	0.0178		3.10707	8.51625
247	123502	5.872	0.24101	0.018		3.01465	8.68834
248	124002	6.022	0.24588	0.0181		3.09166	8.68551
249	124502	6.116	0.2458	0.0181		3.13992	8.65371
250	125002	6.004	0.2449	0.0181		3.08242	8.72332
251	125502	6.034	0.24687	0.0183		3.09782	8.78587
252	126002	6.306	0.24864	0.0185		3.23747	8.51025
253	126502	6.066	0.24084	0.0185		3.11425	8.78693
254	127002	6.272	0.24867	0.0185		3.22001	8.7894
255	127502	6.184	0.24874	0.0188		3.17483	8.88905
256	128002	6.406	0.25156	0.0188		3.28881	8.71873
257	128502	6.192	0.24674	0.0191		3.17894	8.81767
258	129002	6.43	0.24954	0.0194		3.30113	8.75265
259	129502	6.238	0.2477	0.0191		3.20256	8.9636
260	130002	6.268	0.25367	0.0197		3.21796	8.95512
261	130502	6.558	0.25343	0.0199		3.36684	9.1258
262	131002	6.754	0.25826	0.0199		3.46747	9.02792
263	131502	6.486	0.25549	0.02		3.32988	8.98834
264	132002	6.626	0.25437	0.0198		3.40175	9.08728
265	132502	6.856	0.25717	0.0203		3.51983	9.26007
266	133002	6.992	0.26206	0.0205		3.58966	9.08869
267	133502	6.81	0.25721	0.0204		3.49622	9.25936
268	134002	7.018	0.26204	0.0206		3.603	9.29364
269	134502	7.044	0.26301	0.0208		3.61635	9.32615
270	135002	7.144	0.26393	0.021		3.66769	9.29753
271	135502	6.922	0.26312	0.0211		3.55372	9.33039
272	136002	7.004	0.26405	0.0211		3.59582	9.39647
273	136502	7.15	0.26592	0.0213		3.67077	9.39505
274	137002	7.2	0.26588	0.0214		3.69644	9.46572
275	137502	7.206	0.26788	0.0215		3.69952	9.36537
276	138002	7.012	0.26504	0.0214		3.59992	9.46714
277	138502	7.15	0.26792	0.0216		3.67077	9.5371
278	139002	7.174	0.2699	0.0217		3.68309	9.84841
279	139502	7.396	0.27871	0.0217		3.79707	9.63216
280	140002	7.536	0.27259	0.022		3.86894	9.70495
281	140502	7.476	0.27465	0.0221		3.83814	9.84912
282	141002	7.382	0.27873	0.0222		3.78988	9.56855
283	141502	7.31	0.27079	0.0221		3.75292	9.94806
284	142002	7.61	0.28153	0.0223		3.90693	9.77633
285	142502	7.452	0.27667	0.0221		3.82582	9.98834
286	143002	7.446	0.28267	0.0223		3.82274	9.85159
287	143502	7.296	0.2788	0.0222		3.74573	9.92226
288	144002	7.298	0.2808	0.0224		3.74675	10.023
289	144502	7.472	0.28365	0.0224		3.83609	9.8841
290	145002	7.392	0.27972	0.0225		3.79501	10.0915
291	145502	7.546	0.28559	0.0227		3.87408	10.0191
292	146002	7.606	0.28354	0.023		3.90488	10.2261
293	146502	7.77	0.2894	0.023		3.98908	10.1544
294	147002	7.796	0.28737	0.023		4.00243	10.1615
295	147502	7.562	0.28757	0.0231		3.88229	10.1943
296	148002	7.648	0.2885	0.0231		3.92644	10.1901
297	148502	7.788	0.28838	0.0233		3.99832	10.1187
298	149002	7.818	0.28636	0.0233		4.01372	10.3979
299	149502	7.926	0.29426	0.0234		4.06917	10.3689
300	150002	7.72	0.29344	0.0233		3.96341	10.3664
301	150502	7.798	0.29337	0.0234		4.00345	10.3314
302	151002	7.792	0.29238	0.0234		4.00037	10.4332
303	151502	7.928	0.29526	0.0236		4.07019	10.5011
304	152002	8.02	0.29718	0.0237		4.11743	10.5357
305	152502	8.042	0.29816	0.0239		4.12872	10.6424
306	153002	8.022	0.30118	0.0243		4.11845	10.6088
307	153502	7.964	0.30023	0.0244		4.08868	10.5449
308	154002	7.742	0.29842	0.0243		3.9747	10.6424
309	154502	8.028	0.30118	0.0248		4.12153	10.6763
310	155002	8.068	0.30214	0.0251		4.14207	10.6784
311	155502	7.996	0.3022	0.025		4.1051	10.7781
312	156002	8.218	0.30502	0.025		4.21908	10.8477
313	156502	8.242	0.30699	0.0252		4.2314	10.8138
314	157002	8.206	0.30603	0.0253		4.21292	10.8113
315	157502	8.288	0.30596	0.0254		4.25502	10.8456
316	158002	8.316	0.30693	0.0255		4.26939	10.9707
317	158276	5.336	0.31047	0.0345		2.73947	11.1014
318	158278	3.334	0.31417	0.0961		1.71166	11.0078
319	158778	2.924	0.31152	2.5921		1.50117	11.2223
320	159278	2.84	0.31759	2.6139		1.45804	11.3615
321	159778	2.904	0.32153	2.6183		1.4909	11.3272
322	160278	2.872	0.32056	2.6184		1.47447	11.3625
323	160778	2.872	0.32156	2.6185		1.47447	11.3968
324	161278	2.912	0.32253	2.6196		1.49501	11.3975
325	161778	2.878	0.32255	2.6216		1.47755	11.3261
326	162278	2.904	0.32053	2.6215		1.4909	11.3629
327	162778	2.864	0.32157	2.622		1.47036	11.3972
328	163278	2.892	0.32254	2.6227		1.48474	11.4322
329	163778	2.904	0.32353	2.625		1.4909	11.4314
330	164278	2.932	0.32351	2.6288		1.50527	0

## Sheet: E-1
单轴间接拉伸试验结果报告
二进制结果文件存放路径:F:\韦四江-王重洋\石膏E-1-G.uit
文本结果文件存放路径:F:\韦四江-王重洋\石膏E-1-G.txt
试验开始时间:	10:37:45,07/02/2019
试件类型:圆柱体	直径:49.7	mm	高:29.1	mm
相关传感器:	垂直向100KN力传感器(测试件垂直力)
垂直向50MM行程传感器(测试件垂直变形)
两个水平向2.5MM位移传感器(测试件横向变形)
步骤:1	控制模式:行程	波形:斜坡
速率:0.0020	mm/s	终点:0.1450	mm
组号	时间(ms)	垂直力(KN)	垂直变形(mm)	横向变形(mm)		应力	轴向应变
0	0	0	0	0		0	0.0343643
1	500	0	0.001	-0.0005		0	0.0343643
2	1000	0	0.001	0.0026		0	0.0683849
3	1500	0.008	0.00199	0.0028		0.0041237	0.0340206
4	2000	0.012	0.00099	0.0033		0.00618555	0.17079
5	2500	0.032	0.00497	0.0048		0.0164948	0.17079
6	3000	0.038	0.00497	0.0058		0.0195876	0.239519
7	3500	0.034	0.00697	0.0087		0.0175257	0.410997
8	4000	0.044	0.01196	0.0097		0.0226804	0.342268
9	4500	0.048	0.00996	0.0108		0.0247422	0.342612
10	5000	0.038	0.00997	0.0114		0.0195876	0.410997
11	5500	0.044	0.01196	0.0118		0.0226804	0.37732
12	6000	0.026	0.01098	0.0121		0.013402	0.445704
13	6500	0.036	0.01297	0.0129		0.0185567	0.480412
14	7000	0.026	0.01398	0.0131		0.013402	0.480069
15	7500	0.04	0.01397	0.0135		0.0206185	0.548454
16	8000	0.046	0.01596	0.0139		0.0237113	0.548454
17	8500	0.044	0.01596	0.0163		0.0226804	0.615808
18	9000	0.092	0.01792	0.0259		0.0474226	0.719244
19	9500	0.09	0.02093	0.0337		0.0463917	0.68488
20	10000	0.086	0.01993	0.0362		0.0443298	0.650515
21	10500	0.088	0.01893	0.0387		0.0453607	0.68488
22	11000	0.08	0.01993	0.0408		0.041237	0.685223
23	11500	0.078	0.01994	0.0458		0.0402061	0.753265
24	12000	0.094	0.02192	0.0479		0.0484535	0.787629
25	12500	0.092	0.02292	0.0504		0.0474226	0.787973
26	13000	0.088	0.02293	0.0507		0.0453607	0.856357
27	13500	0.096	0.02492	0.0514		0.0494844	0.924742
28	14000	0.104	0.02691	0.0525		0.0536081	0.959107
29	14500	0.112	0.02791	0.0576		0.0577318	0.924742
30	15000	0.108	0.02691	0.0589		0.05567	1.02818
31	15500	0.1	0.02992	0.061		0.0515463	0.993471
32	16000	0.11	0.02891	0.0637		0.0567009	1.19931
33	16500	0.12	0.0349	0.0662		0.0618555	1.16426
34	17000	0.14	0.03388	0.0732		0.0721648	1.13093
35	17500	0.112	0.03291	0.0743		0.0577318	1.13093
36	18000	0.108	0.03291	0.0744		0.05567	1.19897
37	18500	0.134	0.03489	0.0762		0.069072	1.2677
38	19000	0.136	0.03689	0.0805		0.0701029	1.40515
39	19500	0.126	0.04089	0.082		0.0649483	1.26804
40	20000	0.12	0.0369	0.0883		0.0618555	1.30206
41	20500	0.134	0.03789	0.0888		0.069072	1.40447
42	21000	0.15	0.04087	0.0929		0.0773194	1.5079
43	21500	0.144	0.04388	0.0946		0.0742266	1.4732
44	22000	0.16	0.04287	0.0984		0.0824741	1.54227
45	22500	0.142	0.04488	0.1062		0.0731957	1.50997
46	23000	0.074	0.04394	0.1429		0.0381442	1.57835
47	23500	0.082	0.04593	0.1469		0.042268	1.61237
48	24000	0.094	0.04692	0.1487		0.0484535	1.64674
49	24500	0.098	0.04792	0.1507		0.0505154	1.68076
50	25000	0.104	0.04891	0.1526		0.0536081	1.6811
51	25500	0.092	0.04892	0.1559		0.0474226	1.71512
52	26000	0.11	0.04991	0.158		0.0567009	1.81787
53	26500	0.116	0.0529	0.1586		0.0597937	1.78385
54	27000	0.104	0.05191	0.1597		0.0536081	1.92096
55	27500	0.12	0.0559	0.1606		0.0618555	1.81821
56	28000	0.112	0.05291	0.1625		0.0577318	1.85223
57	28500	0.118	0.0539	0.171		0.0608246	1.95601
58	29000	0.092	0.05692	0.1983		0.0474226	1.9567
59	29500	0.076	0.05694	0.2036		0.0391752	2.05911
60	30000	0.092	0.05992	0.207		0.0474226	2.02509
61	30500	0.086	0.05893	0.2105		0.0443298	2.02509
62	31000	0.082	0.05893	0.2115		0.042268	2.16289
63	31500	0.07	0.06294	0.2169		0.0360824	2.16289
64	32000	0.074	0.06294	0.2209		0.0381442	2.16186
65	32500	0.102	0.06291	0.2215		0.0525772	2.19622
66	33000	0.104	0.06391	0.2333		0.0536081	2.23093
67	33500	0.098	0.06492	0.2341		0.0505154	2.36838
68	34000	0.1	0.06892	0.2358		0.0515463	2.33333
69	34500	0.114	0.0679	0.2398		0.0587628	2.43677
70	35000	0.106	0.07091	0.241		0.0546391	2.43677
71	35500	0.11	0.07091	0.242		0.0567009	2.3677
72	36000	0.114	0.0689	0.243		0.0587628	2.57354
73	36500	0.128	0.07489	0.2461		0.0659792	2.53986
74	37000	0.106	0.07391	0.2472		0.0546391	2.5055
75	37500	0.104	0.07291	0.2482		0.0536081	2.57423
76	38000	0.106	0.07491	0.2487		0.0546391	2.64296
77	38500	0.112	0.07691	0.2618		0.0577318	2.67698
78	39000	0.118	0.0779	0.2629		0.0608246	2.6079
79	39500	0.13	0.07589	0.2711		0.0670102	2.74467
80	40000	0.152	0.07987	0.2736		0.0783503	2.71065
81	40500	0.148	0.07888	0.274		0.0762885	2.81375
82	41000	0.138	0.08188	0.2744		0.0711339	2.91615
83	41500	0.17	0.08486	0.2754		0.0876287	2.81375
84	42000	0.148	0.08188	0.2775		0.0762885	2.81375
85	42500	0.142	0.08188	0.2777		0.0731957	2.91649
86	43000	0.152	0.08487	0.2779		0.0783503	3.12062
87	43500	0.224	0.09081	0.2824		0.115464	2.98557
88	44000	0.144	0.08688	0.2885		0.0742266	2.98522
89	44500	0.154	0.08687	0.2894		0.0793813	3.05361
90	45000	0.166	0.08886	0.2896		0.0855668	3.01856
91	45500	0.188	0.08784	0.3059		0.096907	3.05292
92	46000	0.188	0.08884	0.3065		0.096907	3.22474
93	46500	0.19	0.09384	0.3068		0.0979379	3.08797
94	47000	0.172	0.08986	0.3069		0.0886596	3.19003
95	47500	0.2	0.09283	0.3076		0.103093	3.25911
96	48000	0.186	0.09484	0.3098		0.0958761	3.3622
97	48500	0.194	0.09784	0.3105		0.0999998	3.32784
98	49000	0.186	0.09684	0.3108		0.0958761	3.36186
99	49500	0.198	0.09783	0.3113		0.102062	3.53265
100	50000	0.238	0.1028	0.3209		0.12268	3.43024
101	50500	0.216	0.09982	0.3243		0.11134	3.49931
102	51000	0.202	0.10183	0.3251		0.104123	3.49897
103	51500	0.208	0.10182	0.3253		0.107216	3.56735
104	52000	0.226	0.10381	0.3267		0.116495	3.60137
105	52500	0.232	0.1048	0.3289		0.119587	3.60172
106	53000	0.228	0.10481	0.332		0.117526	3.60172
107	53500	0.222	0.10481	0.3352		0.114433	3.63608
108	54000	0.222	0.10581	0.3372		0.114433	3.73918
109	54500	0.224	0.10881	0.3401		0.115464	3.73918
110	55000	0.228	0.10881	0.3415		0.117526	3.80687
111	55500	0.256	0.11078	0.346		0.131958	3.77285
112	56000	0.244	0.10979	0.3471		0.125773	3.87595
113	56500	0.246	0.11279	0.3568		0.126804	3.84124
114	57000	0.262	0.11178	0.3576		0.135051	3.91031
115	57500	0.252	0.11379	0.3602		0.129897	3.97869
116	58000	0.264	0.11578	0.3612		0.136082	4.04708
117	58500	0.27	0.11777	0.3623		0.139175	4.01306
118	59000	0.262	0.11678	0.3639		0.135051	4.04742
119	59500	0.262	0.11778	0.3662		0.135051	4.11615
120	60000	0.262	0.11978	0.3684		0.135051	4.08179
121	60500	0.266	0.11878	0.3694		0.137113	4.15052
122	61000	0.264	0.12078	0.3716		0.136082	4.18454
123	61500	0.276	0.12177	0.3724		0.142268	4.2189
124	62000	0.278	0.12277	0.3735		0.143299	4.28763
125	62500	0.278	0.12477	0.376		0.143299	4.28729
126	63000	0.284	0.12476	0.379		0.146391	4.28729
127	63500	0.29	0.12476	0.3809		0.149484	4.35567
128	64000	0.294	0.12675	0.3836		0.151546	4.4244
129	64500	0.298	0.12875	0.3862		0.153608	4.4244
130	65000	0.3	0.12875	0.3887		0.154639	4.39003
131	65500	0.3	0.12775	0.3905		0.154639	4.45876
132	66000	0.298	0.12975	0.3924		0.153608	4.49313
133	66500	0.296	0.13075	0.3949		0.152577	4.52749
134	67000	0.298	0.13175	0.3989		0.153608	4.59553
135	67500	0.32	0.13373	0.4006		0.164948	4.6299
136	68000	0.322	0.13473	0.4026		0.165979	4.66426
137	68500	0.314	0.13573	0.4049		0.161855	4.66426
138	69000	0.322	0.13573	0.4077		0.165979	4.74227
139	69500	0	0.138	1.3731		0	4.74227
140	70000	0	0.138	1.3733		0	4.811
141	70500	0	0.14	1.3734		0	4.84536
142	71000	0	0.141	1.3736		0	4.91409
143	71500	0	0.143	1.3735		0	4.94845
144	72000	0	0.144	1.374		0	4.98282
145	72500	0	0.145	1.374		0	4.98282
146	73000	0	0.145	1.3741		0	0

## Sheet: E-2
Uniaxial indirect tensile test results report
Binary result file storage path :F:\ Wei Sijiang - Wang Chongyang \ Gypsum E-3-g.U-IT
F:\ Wei Sijiang - Wang Chongyang \ Gypsum E-3-g.t
Start time:	10:47:25,07/02/2019
Specimen type: cylinder	Diameter: 49.8	mm	Height: 28.7	mm
Related sensors:	Vertical force transducer, 100KN (Test piece vertical force
Vertical travel sensor of 50MM (vertical deformation of test parts)
Two horizontal displacement sensors of 2.5mm (lateral deformation of test pieces)
Steps: 1.	Control mode: stroke	Waveform: Slope
Rate: 0.0020	mm/s	Destination: 0.2160	mm
Set no.	Time (ms)	Vertical force (KN)	Vertical deformation (mm)	Transverse deformation (mm)			Axial strain
0	0	0	0	0		0	0.0696864
1	565	0	0.002	0.0007		0	0.209059
2	1065	0.004	0.006	0.0007		0.00205358	0.208711
3	1565	0.006	0.00599	0.0007		0.00308037	0.243554
4	2065	0.012	0.00699	0.0007		0.00616074	0.278049
5	2565	0.018	0.00798	0.0008		0.00924111	0.243206
6	3065	0.02	0.00698	0.0007		0.0102679	0.278049
7	3565	0.022	0.00798	0.0008		0.0112947	0.243554
8	4065	0.012	0.00699	0.0008		0.00616074	0.31324
9	4565	0.016	0.00899	0.0009		0.00821432	0.312892
10	5065	0.024	0.00898	0.001		0.0123215	0.347387
11	5565	0.038	0.00997	0.001		0.019509	0.416725
12	6065	0.05	0.01196	0.0013		0.0256697	0.45122
13	6565	0.054	0.01295	0.0015		0.0277233	0.451568
14	7065	0.048	0.01296	0.0018		0.0246429	0.521254
15	7565	0.048	0.01496	0.0025		0.0246429	0.521254
16	8065	0.044	0.01496	0.0025		0.0225894	0.451916
17	8565	0.034	0.01297	0.0041		0.0174554	0.591986
18	9065	0.012	0.01699	0.0049		0.00616074	0.72892
19	9565	0.098	0.02092	0.0063		0.0503127	0.625784
20	10065	0.044	0.01796	0.0066		0.0225894	0.695122
21	10565	0.06	0.01995	0.0066		0.0308037	0.76446
22	11065	0.076	0.02194	0.0067		0.039018	0.764111
23	11565	0.084	0.02193	0.0067		0.0431252	0.833449
24	12065	0.092	0.02392	0.007		0.0472323	0.833101
25	12565	0.108	0.02391	0.0071		0.0554466	0.902439
26	13065	0.116	0.0259	0.0075		0.0595538	0.903136
27	13565	0.098	0.02592	0.0075		0.0503127	0.938676
28	14065	0.076	0.02694	0.0077		0.039018	1.04181
29	14565	0.116	0.0299	0.008		0.0595538	0.971777
30	15065	0.124	0.02789	0.008		0.063661	0.972822
31	15565	0.098	0.02792	0.0086		0.0503127	1.04181
32	16065	0.118	0.0299	0.0089		0.0605806	1.07666
33	16565	0.116	0.0309	0.0089		0.0595538	1.1115
34	17065	0.114	0.0319	0.0094		0.058527	1.18084
35	17565	0.124	0.03389	0.0098		0.063661	1.18084
36	18065	0.128	0.03389	0.0101		0.0657145	1.25052
37	18565	0.134	0.03589	0.0104		0.0687949	1.28537
38	19065	0.13	0.03689	0.0108		0.0667413	1.28502
39	19565	0.146	0.03688	0.011		0.0749556	1.45958
40	20065	0.128	0.04189	0.0114		0.0657145	1.42369
41	20565	0.166	0.04086	0.0118		0.0852235	1.42369
42	21065	0.17	0.04086	0.0118		0.0872771	1.42369
43	21565	0.162	0.04086	0.0121		0.08317	1.45854
44	22065	0.16	0.04186	0.0125		0.0821432	1.49338
45	22565	0.164	0.04286	0.0129		0.0841967	1.59791
46	23065	0.164	0.04586	0.0134		0.0841967	1.56272
47	23565	0.174	0.04485	0.0137		0.0893307	1.59756
48	24065	0.174	0.04585	0.0141		0.0893307	1.66725
49	24565	0.174	0.04785	0.0145		0.0893307	1.66725
50	25065	0.176	0.04785	0.0147		0.0903575	1.70174
51	25565	0.186	0.04884	0.015		0.0954914	1.73659
52	26065	0.192	0.04984	0.0151		0.0985718	1.77143
53	26565	0.19	0.05084	0.0158		0.097545	1.84077
54	27065	0.196	0.05283	0.0161		0.100625	1.84077
55	27565	0.2	0.05283	0.0163		0.102679	1.87526
56	28065	0.212	0.05382	0.0166		0.10884	1.9101
57	28565	0.208	0.05482	0.0171		0.106786	1.9446
58	29065	0.22	0.05581	0.0173		0.112947	2.01394
59	29565	0.23	0.0578	0.0178		0.118081	2.04878
60	30065	0.232	0.0588	0.018		0.119108	2.08362
61	30565	0.232	0.0598	0.0182		0.119108	2.04913
62	31065	0.226	0.05881	0.0186		0.116027	2.11847
63	31565	0.234	0.0608	0.0191		0.120134	2.15366
64	32065	0.22	0.06181	0.0195		0.112947	2.15296
65	32565	0.246	0.06179	0.0199		0.126295	2.25714
66	33065	0.258	0.06478	0.0204		0.132456	2.25714
67	33565	0.264	0.06478	0.0204		0.135536	2.32648
68	34065	0.276	0.06677	0.0213		0.141697	2.36098
69	34565	0.286	0.06776	0.0215		0.146831	2.39617
70	35065	0.274	0.06877	0.0221		0.14067	2.43066
71	35565	0.282	0.06976	0.0226		0.144777	2.5
72	36065	0.298	0.07175	0.0234		0.152992	2.46551
73	36565	0.284	0.07076	0.024		0.145804	2.46551
74	37065	0.28	0.07076	0.025		0.143751	2.57003
75	37565	0.282	0.07376	0.0258		0.144777	2.56969
76	38065	0.29	0.07375	0.0263		0.148884	2.60488
77	38565	0.28	0.07476	0.0269		0.143751	2.63972
78	39065	0.288	0.07576	0.0276		0.147858	2.70871
79	39565	0.3	0.07774	0.0283		0.154018	2.64042
80	40065	0.264	0.07578	0.0292		0.135536	2.77875
81	40565	0.294	0.07975	0.0304		0.150938	2.77875
82	41065	0.296	0.07975	0.0309		0.151965	2.84774
83	41565	0.32	0.08173	0.0315		0.164286	2.84774
84	42065	0.318	0.08173	0.0323		0.16326	2.95261
85	42565	0.302	0.08474	0.0335		0.155045	2.91916
86	43065	0.262	0.08378	0.0394		0.134509	2.9892
87	43565	0.244	0.08579	0.0439		0.125268	2.92056
88	44065	0.212	0.08382	0.0466		0.10884	3.02404
89	44565	0.244	0.08679	0.0477		0.125268	3.05854
90	45065	0.262	0.08778	0.0482		0.134509	3.12822
91	45565	0.254	0.08978	0.0492		0.130402	3.12787
92	46065	0.27	0.08977	0.0502		0.138617	3.19686
93	46565	0.296	0.09175	0.0509		0.151965	3.19686
94	47065	0.298	0.09175	0.0515		0.152992	3.37038
95	47565	0.312	0.09673	0.0523		0.160179	3.26655
96	48065	0.29	0.09375	0.0529		0.148884	3.33624
97	48565	0.298	0.09575	0.0535		0.152992	3.33554
98	49065	0.312	0.09573	0.0544		0.160179	3.40488
99	49565	0.332	0.09772	0.0555		0.170447	3.44042
100	50065	0.31	0.09874	0.0561		0.159152	3.40523
101	50565	0.312	0.09773	0.0562		0.160179	3.47387
102	51065	0.358	0.0997	0.0568		0.183795	3.47456
103	51565	0.324	0.09972	0.0579		0.16634	3.64739
104	52065	0.374	0.10468	0.0589		0.19201	3.61359
105	52565	0.344	0.10371	0.0604		0.176608	3.61324
106	53065	0.35	0.1037	0.0615		0.179688	3.78641
107	53565	0.392	0.10867	0.0626		0.201251	3.71707
108	54065	0.372	0.10668	0.0629		0.190983	3.71742
109	54565	0.362	0.10669	0.0636		0.185849	3.78641
110	55065	0.384	0.10867	0.0648		0.197144	3.8561
111	55565	0.39	0.11067	0.0652		0.200224	3.85645
112	56065	0.382	0.11068	0.0657		0.196117	3.8561
113	56565	0.384	0.11067	0.0663		0.197144	3.92509
114	57065	0.41	0.11265	0.0668		0.210492	3.95993
115	57565	0.41	0.11365	0.0677		0.210492	3.99477
116	58065	0.416	0.11465	0.0683		0.213572	4.06411
117	58565	0.428	0.11664	0.0691		0.219733	4.06446
118	59065	0.416	0.11665	0.0699		0.213572	4.09895
119	59565	0.426	0.11764	0.0706		0.218706	4.13345
120	60065	0.43	0.11863	0.0717		0.22076	4.13415
121	60565	0.416	0.11865	0.0728		0.213572	4.23728
122	61065	0.46	0.12161	0.0736		0.236162	4.16864
123	61565	0.428	0.11964	0.074		0.219733	4.30662
124	62065	0.47	0.1236	0.0749		0.241296	4.34216
125	62565	0.45	0.12462	0.0752		0.231028	4.34216
126	63065	0.448	0.12462	0.0758		0.230001	4.4108
127	63565	0.482	0.12659	0.0767		0.247456	4.37631
128	64065	0.466	0.1256	0.078		0.239242	4.48188
129	64565	0.432	0.12863	0.0794		0.221787	4.55854
130	65065	0.204	0.13083	0.1398		0.104733	4.52509
131	65565	0.15	0.12987	0.144		0.0770092	4.52509
132	66065	0.156	0.12987	0.1476		0.0800896	4.55958
133	66565	0.16	0.13086	0.1503		0.0821432	4.55958
134	67065	0.168	0.13086	0.1523		0.0862503	4.62892
135	67565	0.182	0.13285	0.1536		0.0934378	4.66376
136	68065	0.174	0.13385	0.1555		0.0893307	4.69826
137	68565	0.184	0.13484	0.1578		0.0944646	4.76794
138	69065	0.184	0.13684	0.1599		0.0944646	4.80209
139	69565	0.21	0.13782	0.1615		0.107813	4.87213
140	70065	0.198	0.13983	0.164		0.101652	4.83693
141	70565	0.206	0.13882	0.1667		0.105759	4.90662
142	71065	0.208	0.14082	0.1688		0.106786	4.90732
143	71565	0.186	0.14084	0.1716		0.0954914	5.0108
144	72065	0.218	0.14381	0.1749		0.11192	5.01115
145	72565	0.212	0.14382	0.1766		0.10884	5.01115
146	73065	0.208	0.14382	0.1778		0.106786	5.21986
147	73565	0.224	0.14981	0.1802		0.115	5.11533
148	74065	0.228	0.14681	0.1821		0.117054	5.11568
149	74565	0.214	0.14682	0.1833		0.109866	5.18606
150	75065	0.194	0.14884	0.1858		0.0995986	5.18502
151	75565	0.218	0.14881	0.1895		0.11192	5.25436
152	76065	0.232	0.1508	0.1913		0.119108	5.32369
153	76565	0.246	0.15279	0.193		0.126295	5.32439
154	77065	0.226	0.15281	0.1954		0.116027	5.32439
155	77565	0.228	0.15281	0.1978		0.117054	5.35958
156	78065	0.216	0.15382	0.2005		0.110893	5.39408
157	78565	0.224	0.15481	0.2032		0.115	5.35923
158	79065	0.22	0.15381	0.2061		0.112947	5.53798
159	79565	0.07	0.15894	0.3421		0.0359376	5.57282
160	80065	0.074	0.15994	0.3448		0.0379912	5.53798
161	80565	0.07	0.15894	0.3469		0.0359376	5.64251
162	81065	0.076	0.16194	0.3494		0.039018	5.64216
163	81565	0.088	0.16193	0.3523		0.0451787	5.7115
164	82065	0.092	0.16392	0.3543		0.0472323	5.74564
165	82565	0.114	0.1649	0.3563		0.058527	5.74599
166	83065	0.11	0.16491	0.3579		0.0564734	5.78049
167	83565	0.116	0.1659	0.3596		0.0595538	5.78049
168	84065	0.112	0.1659	0.3609		0.0575002	5.81568
169	84565	0.108	0.16691	0.3639		0.0554466	5.84983
170	85065	0.126	0.16789	0.3678		0.0646877	5.91916
171	85565	0.138	0.16988	0.3695		0.0708485	5.9892
172	86065	0.126	0.17189	0.3706		0.0646877	6.02334
173	86565	0.148	0.17287	0.3717		0.0759824	5.91951
174	87065	0.13	0.16989	0.3744		0.0667413	6.09408
175	87565	0.12	0.1749	0.3757		0.0616074	6.09373
176	88065	0.124	0.17489	0.381		0.063661	6.09408
177	88565	0.112	0.1749	0.381		0.0575002	6.19791
178	89065	0.136	0.17788	0.3887		0.0698217	6.05854
179	89565	0.14	0.17388	0.3887		0.0718753	6.26725
180	90065	0.152	0.17987	0.3899		0.078036	6.37178
181	90565	0.158	0.18287	0.3945		0.0811164	6.23206
182	91065	0.16	0.17886	0.3961		0.0821432	6.30105
183	91565	0.188	0.18084	0.3985		0.0965182	6.40592
184	92065	0.176	0.18385	0.4023		0.0903575	6.37178
185	92565	0.148	0.18287	0.4059		0.0759824	6.5108
186	93065	0.168	0.18686	0.4059		0.0862503	6.33728
187	93565	0.142	0.18188	0.4082		0.0729021	6.47561
188	94065	0.178	0.18585	0.4108		0.0913843	6.58014
189	94565	0.182	0.18885	0.4108		0.0934378	6.61463
190	95065	0.19	0.18984	0.4113		0.097545	6.5439
191	95565	0.222	0.18781	0.4126		0.113974	6.57944
192	96065	0.2	0.18883	0.4261		0.102679	6.64878
193	96565	0.21	0.19082	0.4275		0.107813	6.75331
194	97065	0.206	0.19382	0.4305		0.105759	6.68571
195	97565	0.14	0.19188	0.4339		0.0718753	6.7892
196	98065	0.174	0.19485	0.4344		0.0893307	6.82369
197	98565	0.188	0.19584	0.4345		0.0965182	6.82369
198	99065	0.192	0.19584	0.4355		0.0985718	6.89268
199	99565	0.206	0.19782	0.4357		0.105759	6.9324
200	100065	0.052	0.19896	0.6032		0.0266965	7.03659
201	100565	0.058	0.20195	0.6053		0.0297769	6.93206
202	101065	0.06	0.19895	0.6068		0.0308037	6.9669
203	101565	0.062	0.19995	0.61		0.0318305	7.07143
204	102065	0.062	0.20295	0.6102		0.0318305	7.24425
205	102565	0.1	0.20791	0.6279		0.0513395	7.17526
206	103065	0.082	0.20593	0.6344		0.0420984	7.17456
207	103565	0.1	0.20591	0.6416		0.0513395	7.2101
208	104065	0.088	0.20693	0.6482		0.0451787	7.31429
209	104565	0.098	0.20992	0.6534		0.0503127	7.17491
210	105065	0.09	0.20592	0.6558		0.0462055	7.38467
211	105565	0.076	0.21194	0.6657		0.039018	7.45401
212	106065	0.086	0.21393	0.6751		0.0441519	7.34983
213	106565	0.072	0.21094	0.6856		0.0369644	7.4547
214	107065	0.058	0.21395	0.6937		0.0297769	7.42125
215	107565	0.016	0.21299	0.7347		0.00821432	7.52613
216	107895	0	0.216	0.7372		0	0

## Sheet: E-3
Uniaxial indirect tensile test results report
Binary result file storage path :F:\ Wei Sijiang - Wang Chongyang \ Gypsum E-3-g.U-IT
F:\ Wei Sijiang - Wang Chongyang \ Gypsum E-3-g.t
Start time:	10:47:25,07/02/2019
Specimen type: cylinder	Diameter: 49.8	mm	Height: 28.6	mm
Related sensors:	Vertical force transducer, 100KN (Test piece vertical force
Vertical travel sensor of 50MM (vertical deformation of test parts)
Two horizontal displacement sensors of 2.5mm (lateral deformation of test pieces)
Steps: 1.	Control mode: stroke	Waveform: Slope
Rate: 0.0020	mm/s	Destination: 0.3158	mm
Set no.	Time (ms)	Vertical force (KN)	Vertical deformation (mm)	Transverse deformation (mm)			Axial strain
0	0	0	0	0		stress	0.034965
1	500	0	0.001	0		0	0.034965
2	1000	0	0.001	0		0	0.104895
3	1500	0	0.003	0		0	0.13986
4	2000	0.006	0.004	0		0	0.173776
5	2500	0.038	0.00497	0.0013		0.00308037	0.138462
6	3000	0.048	0.00396	0.0014		0.019509	0.138462
7	3500	0.05	0.00396	0.0014		0.0246429	0.242657
8	4000	0.07	0.00694	0.0022		0.0256697	0.277622
9	4500	0.072	0.00794	0.0027		0.0359376	0.311538
10	5000	0.102	0.00891	0.003		0.0369644	0.381818
11	5500	0.094	0.01092	0.0041		0.0523663	0.347552
12	6000	0.07	0.00994	0.0049		0.0482591	0.451748
13	6500	0.098	0.01292	0.0055		0.0359376	0.520979
14	7000	0.116	0.0149	0.0058		0.0503127	0.486364
15	7500	0.108	0.01391	0.006		0.0595538	0.486713
16	8000	0.094	0.01392	0.0066		0.0554466	0.590909
17	8500	0.118	0.0169	0.007		0.0482591	0.625175
18	9000	0.14	0.01788	0.0072		0.0605806	0.625524
19	9500	0.132	0.01789	0.0074		0.0718753	0.625874
20	10000	0.12	0.0179	0.008		0.0677681	0.66014
21	10500	0.14	0.01888	0.0081		0.0616074	0.835664
22	11000	0.12	0.0239	0.0081		0.0718753	0.870629
23	11500	0.114	0.0249	0.0081		0.0616074	0.695804
24	12000	0.114	0.0199	0.0081		0.058527	0.87028
25	12500	0.136	0.02489	0.0081		0.058527	0.870629
26	13000	0.12	0.0249	0.0082		0.0698217	0.904545
27	13500	0.16	0.02587	0.011		0.0616074	0.973427
28	14000	0.192	0.02784	0.011		0.0821432	0.973427
29	14500	0.19	0.02784	0.0111		0.0985718	0.973776
30	15000	0.182	0.02785	0.0114		0.097545	1.04301
31	15500	0.2	0.02983	0.0117		0.0934378	1.11224
32	16000	0.224	0.03181	0.012		0.102679	1.14685
33	16500	0.236	0.0328	0.0121		0.115	1.1472
34	17000	0.224	0.03281	0.0124		0.121161	1.1472
35	17500	0.228	0.03281	0.0126		0.115	1.18217
36	18000	0.228	0.03381	0.0127		0.117054	1.2521
37	18500	0.224	0.03581	0.0134		0.117054	1.2521
38	19000	0.23	0.03581	0.0138		0.115	1.28671
39	19500	0.238	0.0368	0.0143		0.118081	1.32168
40	20000	0.236	0.0378	0.0145		0.122188	1.35629
41	20500	0.246	0.03879	0.0151		0.121161	1.42552
42	21000	0.272	0.04077	0.0153		0.126295	1.49545
43	21500	0.274	0.04277	0.0162		0.139643	1.4951
44	22000	0.282	0.04276	0.0167		0.14067	1.53007
45	22500	0.278	0.04376	0.0169		0.144777	1.53007
46	23000	0.288	0.04376	0.0173		0.142724	1.6
47	23500	0.286	0.04576	0.0181		0.147858	1.66888
48	24000	0.316	0.04773	0.0185		0.146831	1.66923
49	24500	0.304	0.04774	0.0186		0.162233	1.70385
50	25000	0.32	0.04873	0.0188		0.156072	1.63462
51	25500	0.29	0.04675	0.0191		0.164286	1.77378
52	26000	0.324	0.05073	0.0196		0.148884	1.80874
53	26500	0.32	0.05173	0.0198		0.16634	1.84371
54	27000	0.322	0.05273	0.0204		0.164286	1.9479
55	27500	0.346	0.05571	0.0212		0.165313	1.91259
56	28000	0.356	0.0547	0.0216		0.177635	1.98217
57	28500	0.366	0.05669	0.0219		0.182769	2.01678
58	29000	0.38	0.05768	0.0222		0.187902	2.01678
59	29500	0.378	0.05768	0.0227		0.19509	1.98217
60	30000	0.362	0.05669	0.023		0.194063	2.01678
61	30500	0.376	0.05768	0.0237		0.185849	2.08671
62	31000	0.382	0.05968	0.0241		0.193036	2.15664
63	31500	0.382	0.06168	0.0245		0.196117	2.19126
64	32000	0.39	0.06267	0.0252		0.196117	2.19091
65	32500	0.398	0.06266	0.0257		0.200224	2.19056
66	33000	0.414	0.06265	0.0261		0.204331	2.26014
67	33500	0.42	0.06464	0.0265		0.212545	2.2951
68	34000	0.426	0.06564	0.027		0.215626	2.36469
69	34500	0.434	0.06763	0.0274		0.218706	2.36469
70	35000	0.432	0.06763	0.0279		0.222813	2.43462
71	35500	0.434	0.06963	0.0283		0.221787	2.43427
72	36000	0.444	0.06962	0.0288		0.222813	2.53881
73	36500	0.464	0.07261	0.0291		0.227947	2.50315
74	37000	0.48	0.07159	0.0296		0.238215	2.46958
75	37500	0.442	0.07063	0.0301		0.246429	2.57308
76	38000	0.478	0.07359	0.0307		0.22692	2.64301
77	38500	0.482	0.07559	0.0311		0.245403	2.67762
78	39000	0.49	0.07658	0.0317		0.247456	2.71189
79	39500	0.518	0.07756	0.0321		0.251563	2.7465
80	40000	0.528	0.07855	0.0325		0.265938	2.81643
81	40500	0.528	0.08055	0.0328		0.271072	2.78147
82	41000	0.536	0.07955	0.0333		0.271072	2.88462
83	41500	0.59	0.0825	0.0336		0.27518	3.06014
84	42000	0.57	0.08752	0.0339		0.302903	2.88462
85	42500	0.586	0.0825	0.0341		0.292635	2.91958
86	43000	0.584	0.0835	0.0346		0.300849	2.9549
87	43500	0.572	0.08451	0.0349		0.299823	3.05909
88	44000	0.606	0.08749	0.0354		0.293662	3.05944
89	44500	0.586	0.0875	0.0357		0.311117	3.09301
90	45000	0.638	0.08846	0.0362		0.300849	3.12902
91	45500	0.604	0.08949	0.0365		0.327546	3.12867
92	46000	0.614	0.08948	0.0371		0.31009	3.16329
93	46500	0.622	0.09047	0.0375		0.315224	3.1979
94	47000	0.636	0.09146	0.0379		0.319332	3.23287
95	47500	0.64	0.09246	0.0382		0.326519	3.30245
96	48000	0.644	0.09445	0.0388		0.328573	3.3021
97	48500	0.658	0.09444	0.0391		0.330626	3.30245
98	49000	0.644	0.09445	0.0395		0.337814	3.33636
99	49500	0.68	0.09542	0.0401		0.330626	3.40629
100	50000	0.686	0.09742	0.0403		0.349108	3.44021
101	50500	0.716	0.09839	0.0406		0.352189	3.51014
102	51000	0.72	0.10039	0.041		0.367591	3.47517
103	51500	0.718	0.09939	0.0415		0.369644	3.5451
104	52000	0.718	0.10139	0.042		0.368617	3.57972
105	52500	0.726	0.10238	0.0423		0.368617	3.61434
106	53000	0.738	0.10337	0.0427		0.372725	3.61434
107	53500	0.742	0.10337	0.043		0.378885	3.68392
108	54000	0.754	0.10536	0.0433		0.380939	3.7521
109	54500	0.808	0.10731	0.0436		0.3871	3.7528
110	55000	0.786	0.10733	0.0437		0.414823	3.89161
111	55500	0.822	0.1113	0.0444		0.403528	3.82203
112	56000	0.808	0.10931	0.0447		0.42201	3.85699
113	56500	0.808	0.11031	0.0453		0.414823	3.89091
114	57000	0.848	0.11128	0.0457		0.414823	3.96119
115	57500	0.84	0.11329	0.0458		0.435359	3.92587
116	58000	0.846	0.11228	0.0461		0.431252	4.06469
117	58500	0.886	0.11625	0.0465		0.434332	3.99545
118	59000	0.86	0.11427	0.0467		0.454868	4.06538
119	59500	0.862	0.11627	0.0472		0.441519	4.06573
120	60000	0.844	0.11628	0.0462		0.442546	4.17063
121	60500	0.85	0.11928	0.0472		0.433305	4.27517
122	61000	0.862	0.12227	0.0475		0.436386	4.17063
123	61500	0.852	0.11928	0.0479		0.442546	4.23881
124	62000	0.902	0.12123	0.0489		0.437412	4.37937
125	62500	0.882	0.12525	0.0492		0.463082	4.27448
126	63000	0.886	0.12225	0.0497		0.452814	4.48392
127	63500	0.894	0.12824	0.0502		0.454868	4.37867
128	64000	0.904	0.12523	0.0505		0.458975	4.48252
129	64500	0.94	0.1282	0.0507		0.464109	4.58811
130	65000	0.924	0.13122	0.0509		0.482591	4.55175
131	65500	0.97	0.13018	0.0516		0.474377	4.44825
132	66000	0.916	0.12722	0.0521		0.497993	4.55105
133	66500	0.986	0.13016	0.0527		0.47027	4.72517
134	67000	1.012	0.13514	0.0531		0.506207	4.62098
135	67500	0.986	0.13216	0.0533		0.519555	4.68951
136	68000	1.036	0.13412	0.0537		0.506207	4.86434
137	68500	1.04	0.13912	0.0539		0.531877	4.69126
138	69000	0.982	0.13417	0.0546		0.533931	4.79406
139	69500	1.044	0.13711	0.0551		0.504154	4.76014
140	70000	1.018	0.13614	0.0553		0.535984	4.89825
141	70500	1.074	0.14009	0.0561		0.522636	4.93287
142	71000	1.088	0.14108	0.0562		0.551386	4.93252
143	71500	1.09	0.14107	0.057		0.558574	4.96748
144	72000	1.092	0.14207	0.0574		0.5596	5.07168
145	72500	1.12	0.14505	0.058		0.560627	5.10594
146	73000	1.148	0.14603	0.0586		0.575002	5.07133
147	73500	1.13	0.14504	0.0586		0.589377	5.14196
148	74000	1.11	0.14706	0.0593		0.580136	5.14056
149	74500	1.158	0.14702	0.06		0.569868	5.17552
150	75000	1.152	0.14802	0.0603		0.594511	5.17587
151	75500	1.14	0.14803	0.0608		0.591431	5.21119
152	76000	1.136	0.14904	0.0614		0.58527	5.21084
153	76500	1.144	0.14903	0.062		0.583216	5.24545
154	77000	1.158	0.15002	0.0624		0.587324	5.38462
155	77500	1.174	0.154	0.0631		0.594511	5.41783
156	78000	1.232	0.15495	0.0636		0.602725	5.41818
157	78500	1.224	0.15496	0.064		0.632502	5.45315
158	79000	1.228	0.15596	0.0646		0.628395	5.52238
159	79500	1.25	0.15794	0.0651		0.630449	5.48741
160	80000	1.246	0.15694	0.0654		0.641743	5.55874
161	80500	1.198	0.15898	0.066		0.63969	5.55734
162	81000	1.254	0.15894	0.0671		0.615047	5.62622
163	81500	1.286	0.16091	0.0673		0.643797	5.66014
164	82000	1.318	0.16188	0.0683		0.660226	5.66189
165	82500	1.258	0.16193	0.0687		0.676654	5.66259
166	83000	1.238	0.16195	0.0692		0.645851	5.69545
167	83500	1.306	0.16289	0.0699		0.635583	5.87133
168	84000	1.268	0.16792	0.07		0.670494	5.69755
169	84500	1.232	0.16295	0.0698		0.650985	5.94126
170	85000	1.27	0.16992	0.0705		0.632502	5.90664
171	85500	1.256	0.16893	0.0707		0.652011	5.76608
172	86000	1.278	0.16491	0.0709		0.644824	6.04545
173	86500	1.3	0.1729	0.0711		0.656119	5.90594
174	87000	1.288	0.16891	0.0713		0.667413	6.00664
175	87500	1.43	0.17179	0.0735		0.661252	6.04371
176	88000	1.36	0.17285	0.0742		0.734155	6.07762
177	88500	1.392	0.17382	0.0764		0.698217	6.18147
178	89000	1.426	0.17679	0.0791		0.714646	6.14825
179	89500	1.37	0.17584	0.0799		0.732101	6.28881
180	90000	1.346	0.17986	0.0813		0.703351	6.32343
181	90500	1.356	0.18085	0.0825		0.691029	6.35839
182	91000	1.36	0.18185	0.0839		0.696163	6.29021
183	91500	1.298	0.1799	0.0849		0.698217	6.28741
184	92000	1.384	0.17982	0.0861		0.666386	6.4979
185	92500	1.366	0.18584	0.0887		0.710538	6.36014
186	93000	1.292	0.1819	0.089		0.701297	6.46434
187	93500	1.316	0.18488	0.0904		0.663306	6.53462
188	94000	1.302	0.18689	0.0903		0.675628	6.42832
189	94500	1.35	0.18385	0.092		0.66844	6.56993
190	95000	1.29	0.1879	0.0931		0.693083	6.46434
191	95500	1.322	0.18488	0.0963		0.662279	6.67413
192	96000	1.32	0.19088	0.0965		0.678708	6.74406
193	96500	1.324	0.19288	0.0968		0.677681	6.74336
194	97000	1.348	0.19286	0.0972		0.679735	6.77867
195	97500	1.336	0.19387	0.0979		0.692056	6.8479
196	98000	1.36	0.19585	0.1003		0.685895	6.77657
197	98500	1.396	0.19381	0.1033		0.698217	6.91888
198	99000	1.314	0.19788	0.1042		0.716699	6.8465
199	99500	1.406	0.19581	0.1046		0.674601	6.9514
200	100000	1.402	0.19881	0.1054		0.721833	6.95
201	100500	1.45	0.19877	0.1062		0.719779	6.98497
202	101000	1.446	0.19977	0.1063		0.744422	7.16014
203	101500	1.442	0.20478	0.1077		0.742369	6.95909
204	102000	1.144	0.19903	0.1123		0.740315	7.16748
205	102500	1.188	0.20499	0.1135		0.587324	7.16748
206	103000	1.188	0.20499	0.1143		0.609913	7.16783
207	103500	1.174	0.205	0.115		0.609913	7.2021
208	104000	1.206	0.20598	0.1151		0.602725	7.23671
209	104500	1.214	0.20697	0.1159		0.619154	7.30629
210	105000	1.224	0.20896	0.1172		0.623261	7.27133
211	105500	1.22	0.20796	0.1179		0.628395	7.30629
212	106000	1.228	0.20896	0.1192		0.626342	7.34091
213	106500	1.234	0.20995	0.1204		0.630449	7.40944
214	107000	1.282	0.21191	0.121		0.633529	7.44406
215	107500	1.3	0.2129	0.122		0.658172	7.51364
216	108000	1.306	0.21489	0.1239		0.667413	7.40839
217	108500	1.316	0.21188	0.1245		0.670494	7.51434
218	109000	1.278	0.21491	0.1273		0.675628	7.5458
219	109500	1.396	0.21581	0.1299		0.656119	7.65245
220	110000	1.346	0.21886	0.1306		0.716699	7.47727
221	110500	1.358	0.21385	0.1321		0.691029	7.61713
222	111000	1.354	0.21785	0.1332		0.69719	7.82448
223	111500	1.436	0.22378	0.1341		0.695137	7.85979
224	112000	1.42	0.22479	0.1351		0.737235	7.75594
225	112500	1.384	0.22182	0.1356		0.729021	7.78986
226	113000	1.422	0.22279	0.1369		0.710538	7.89545
227	113500	1.402	0.22581	0.1373		0.730047	7.92902
228	114000	1.454	0.22677	0.1382		0.719779	7.89476
229	114500	1.43	0.22579	0.1383		0.746476	7.96434
230	115000	1.432	0.22778	0.1397		0.734155	7.99965
231	115500	1.428	0.22879	0.141		0.735181	7.99895
232	116000	1.452	0.22877	0.1426		0.733128	8.06818
233	116500	1.468	0.23075	0.1437		0.745449	8.10315
234	117000	1.468	0.23175	0.1454		0.753664	8.10315
235	117500	1.472	0.23175	0.1471		0.753664	8.13776
236	118000	1.484	0.23274	0.1486		0.755717	8.13741
237	118500	1.5	0.23273	0.15		0.761878	8.20699
238	119000	1.504	0.23472	0.1505		0.770092	8.24196
239	119500	1.506	0.23572	0.152		0.772146	8.27692
240	120000	1.508	0.23672	0.154		0.773173	8.31119
241	120500	1.528	0.2377	0.155		0.774199	8.31154
242	121000	1.522	0.23771	0.1562		0.784467	8.41573
243	121500	1.548	0.24069	0.1568		0.781387	8.4493
244	122000	1.588	0.24165	0.158		0.794735	8.51958
245	122500	1.574	0.24366	0.1591		0.815271	8.51923
246	123000	1.588	0.24365	0.1611		0.808083	8.5542
247	123500	1.588	0.24465	0.1624		0.815271	8.58916
248	124000	1.586	0.24565	0.1638		0.815271	8.58881
249	124500	1.596	0.24564	0.1646		0.814244	8.65874
250	125000	1.602	0.24764	0.1658		0.819378	8.65839
251	125500	1.614	0.24763	0.1669		0.822458	8.72797
252	126000	1.622	0.24962	0.1679		0.828619	8.76294
253	126500	1.624	0.25062	0.169		0.832726	8.72832
254	127000	1.618	0.24963	0.1702		0.833753	8.7972
255	127500	1.652	0.2516	0.1712		0.830673	8.83252
256	128000	1.638	0.25261	0.1721		0.848128	8.86713
257	128500	1.65	0.2536	0.1735		0.840941	8.90175
258	129000	1.658	0.25459	0.1744		0.847101	8.97133
259	129500	1.674	0.25658	0.1755		0.851209	9.00594
260	130000	1.68	0.25757	0.1764		0.859423	9.07483
261	130500	1.718	0.25954	0.1778		0.862503	9.10979
262	131000	1.718	0.26054	0.1794		0.882012	9.07517
263	131500	1.706	0.25955	0.1815		0.882012	9.17972
264	132000	1.722	0.26254	0.1834		0.875851	9.14476
265	132500	1.722	0.26154	0.1848		0.884066	9.21434
266	133000	1.726	0.26353	0.1863		0.884066	9.2493
267	133500	1.726	0.26453	0.1878		0.886119	9.28427
268	134000	1.728	0.26553	0.1892		0.886119	9.31853
269	134500	1.754	0.26651	0.1902		0.887146	9.3528
270	135000	1.774	0.26749	0.1922		0.900494	9.38811
271	135500	1.77	0.2685	0.1941		0.910762	9.42273
272	136000	1.778	0.26949	0.1954		0.908709	9.42273
273	136500	1.774	0.26949	0.1968		0.912816	9.45769
274	137000	1.78	0.27049	0.1985		0.910762	9.52692
275	137500	1.798	0.27247	0.1999		0.913843	9.56189
276	138000	1.8	0.27347	0.2017		0.923084	9.56189
277	138500	1.802	0.27347	0.2028		0.924111	9.5965
278	139000	1.816	0.27446	0.2043		0.925137	9.66643
279	139500	1.818	0.27646	0.2055		0.932325	9.7014
280	140000	1.814	0.27746	0.207		0.933352	9.7014
281	140500	1.818	0.27746	0.2087		0.931298	9.77028
282	141000	1.846	0.27943	0.2101		0.933352	9.80455
283	141500	1.87	0.28041	0.2121		0.947727	9.83986
284	142000	1.86	0.28142	0.2134		0.960048	9.83986
285	142500	1.862	0.28142	0.2148		0.954914	9.90909
286	143000	1.882	0.2834	0.2162		0.955941	9.94406
287	143500	1.888	0.2844	0.2181		0.966209	10.0483
288	144000	1.902	0.28738	0.2204		0.969289	10.0507
289	144500	1.83	0.28745	0.2265		0.976477	10.0259
290	145000	1.484	0.28674	0.2511		0.939512	10.0951
291	145500	1.502	0.28872	0.2513		0.761878	10.1997
292	146000	1.514	0.29171	0.2548		0.771119	10.1993
293	146500	1.53	0.2917	0.2547		0.77728	10.2343
294	147000	1.528	0.2927	0.2545		0.785494	10.2339
295	147500	1.548	0.29269	0.2554		0.784467	10.2318
296	148000	1.61	0.29263	0.2565		0.794735	10.3021
297	148500	1.596	0.29464	0.2571		0.826566	10.2329
298	149000	1.574	0.29266	0.2579		0.819378	10.3713
299	149500	1.62	0.29662	0.2589		0.808083	10.4402
300	150000	1.658	0.29859	0.2604		0.8317	10.4063
301	150500	1.62	0.29762	0.2613		0.851209	10.479
302	151000	1.526	0.2997	0.2695		0.8317	10.5143
303	151500	1.516	0.30071	0.2712		0.78344	10.5867
304	152000	1.434	0.30278	0.301		0.778306	10.5885
305	152500	1.376	0.30283	0.3041		0.736208	10.6227
306	153000	1.396	0.30381	0.3049		0.706431	10.6923
307	153500	1.41	0.3058	0.3059		0.716699	10.7276
308	154000	1.4	0.30681	0.3072		0.723887	10.7276
309	154500	1.4	0.30681	0.3091		0.718753	10.7619
310	155000	1.422	0.30779	0.3156		0.718753	10.8311
311	155500	1.444	0.30977	0.3169		0.730047	10.7976
312	156000	1.406	0.30881	0.3164		0.741342	10.901
313	156500	1.45	0.31177	0.317		0.721833	10.9357
314	157000	1.464	0.31276	0.3175		0.744422	10.9699
315	157500	1.484	0.31374	0.3203		0.75161	10.9703
316	158000	1.472	0.31375	0.3226		0.761878	11.0402
317	158500	1.47	0.31575	0.3238		0.755717	0
						0.75469

## Sheet: E-9
Uniaxial indirect tensile test results report
Binary result file storage path :F:\ Wei Sijiang - Wang Chongyang \ Gypsum E-3-g.U-IT
F:\ Wei Sijiang - Wang Chongyang \ Gypsum E-3-g.t
Start time:	10:47:25,07/02/2019
Specimen type: cylinder	Diameter: 49.8	mm	Height: 28.9	mm
Related sensors:	Vertical force transducer, 100KN (Test piece vertical force
Vertical travel sensor of 50MM (vertical deformation of test parts)
Two horizontal displacement sensors of 2.5mm (lateral deformation of test pieces)
Steps: 1.	Control mode: stroke	Waveform: Slope
Rate: 0.0020	mm/s	Destination: 0.2851	mm
Set no.	Time (ms)	Vertical force (KN)	Vertical deformation (mm)	Transverse deformation (mm)			Axial strain
0	0	0	0	0		0	-0.000692042
1	499	0.024	-2e-05	0		0.0123215	0.0342561
2	999	0.012	0.00099	0		0.00616074	0.137024
3	1499	0.048	0.00396	0.0001		0.0246429	0.0685121
4	1999	0.02	0.00198	0		0.0102679	0.170242
5	2499	0.09	0.00492	0.0001		0.0462055	0.171626
6	2999	0.052	0.00496	0.0001		0.0266965	0.169896
7	3499	0.11	0.00491	0.0001		0.0564734	0.204844
8	3999	0.092	0.00592	0		0.0472323	0.308651
9	4499	0.092	0.00892	0		0.0472323	0.308997
10	4999	0.084	0.00893	0		0.0431252	0.445329
11	5499	0.158	0.01287	0.0002		0.0811164	0.377509
12	5999	0.106	0.01091	0.0001		0.0544198	0.412111
13	6499	0.112	0.01191	0		0.0575002	0.514533
14	6999	0.156	0.01487	0.0001		0.0800896	0.480623
15	7499	0.124	0.01389	0.0001		0.063661	0.583045
16	7999	0.182	0.01685	0.0001		0.0934378	0.514879
17	8499	0.136	0.01488	0.0001		0.0698217	0.651557
18	8999	0.204	0.01883	0.0002		0.104733	0.583737
19	9499	0.156	0.01687	0.0001		0.0800896	0.720069
20	9999	0.228	0.02081	0.0001		0.117054	0.686851
21	10499	0.18	0.01985	0.0001		0.0924111	0.788235
22	10999	0.256	0.02278	0.0003		0.131429	0.789619
23	11499	0.21	0.02282	0.0002		0.107813	0.822837
24	11999	0.264	0.02378	0.0003		0.135536	0.858131
25	12499	0.23	0.0248	0.0003		0.118081	0.857439
26	12999	0.254	0.02478	0.0003		0.130402	0.926644
27	13499	0.264	0.02678	0.0003		0.135536	0.92699
28	13999	0.248	0.02679	0.0004		0.127322	0.99481
29	14499	0.294	0.02875	0.0004		0.150938	0.9609
30	14999	0.268	0.02777	0.0003		0.13759	1.09827
31	15499	0.302	0.03174	0.0004		0.155045	1.30208
32	15999	0.43	0.03763	0.0009		0.22076	1.06436
33	16499	0.282	0.03076	0.0005		0.144777	1.13426
34	16999	0.264	0.03278	0.0005		0.135536	1.2692
35	17499	0.374	0.03668	0.0008		0.19201	1.20208
36	17999	0.302	0.03474	0.0005		0.155045	1.30519
37	18499	0.332	0.03772	0.0007		0.170447	1.20138
38	18999	0.324	0.03472	0.0007		0.16634	1.30484
39	19499	0.342	0.03771	0.0007		0.175581	1.33841
40	19999	0.376	0.03868	0.0007		0.193036	1.3391
41	20499	0.358	0.0387	0.0007		0.183795	1.40657
42	20999	0.41	0.04065	0.0008		0.210492	1.50969
43	21499	0.438	0.04363	0.001		0.224867	1.44187
44	21999	0.39	0.04167	0.0009		0.200224	1.47578
45	22499	0.412	0.04265	0.0009		0.211519	1.61246
46	22999	0.468	0.0466	0.001		0.240269	1.57785
47	23499	0.466	0.0456	0.001		0.239242	1.54429
48	23999	0.438	0.04463	0.001		0.224867	1.6474
49	24499	0.464	0.04761	0.0011		0.238215	1.61211
50	24999	0.482	0.04659	0.0013		0.247456	1.71557
51	25499	0.5	0.04958	0.0013		0.256697	1.71626
52	25999	0.476	0.0496	0.0013		0.244376	1.78443
53	26499	0.508	0.05157	0.0014		0.260805	1.81869
54	26999	0.52	0.05256	0.0013		0.266965	1.81834
55	27499	0.526	0.05255	0.0013		0.270046	1.92076
56	27999	0.574	0.05551	0.0017		0.294689	1.85156
57	28499	0.574	0.05351	0.0017		0.294689	2.02388
58	28999	0.598	0.05849	0.0018		0.30701	2.05882
59	29499	0.592	0.0595	0.0018		0.30393	2.02526
60	29999	0.556	0.05853	0.0017		0.285447	1.92007
61	30499	0.604	0.05549	0.0019		0.31009	2.12768
62	30999	0.604	0.06149	0.0019		0.31009	2.05571
63	31499	0.692	0.05941	0.0021		0.355269	2.09273
64	31999	0.616	0.06048	0.0021		0.316251	2.19792
65	32499	0.57	0.06352	0.002		0.292635	2.23183
66	32999	0.588	0.0645	0.0021		0.301876	2.26436
67	33499	0.66	0.06544	0.0021		0.338841	2.33322
68	33999	0.672	0.06743	0.0023		0.345001	2.36747
69	34499	0.684	0.06842	0.0023		0.351162	2.33287
70	34999	0.678	0.06742	0.0023		0.348082	2.40208
71	35499	0.68	0.06942	0.0023		0.349108	2.40104
72	35999	0.714	0.06939	0.0024		0.366564	2.43529
73	36499	0.724	0.07038	0.0025		0.371698	2.40104
74	36999	0.722	0.06939	0.0028		0.370671	2.50311
75	37499	0.782	0.07234	0.003		0.401475	2.50208
76	37999	0.814	0.07231	0.0031		0.417903	2.53702
77	38499	0.806	0.07332	0.0031		0.413796	2.60623
78	38999	0.806	0.07532	0.0031		0.413796	2.74221
79	39499	0.888	0.07925	0.0033		0.455895	2.77785
80	39999	0.852	0.08028	0.0032		0.437412	2.80934
81	40499	0.948	0.08119	0.0036		0.486698	2.98304
82	40999	0.926	0.08621	0.0036		0.475404	2.70796
83	41499	0.874	0.07826	0.0035		0.448707	2.94844
84	41999	0.926	0.08521	0.0036		0.475404	3.01626
85	42499	0.974	0.08717	0.0038		0.500046	2.98408
86	42999	0.896	0.08624	0.0037		0.460002	2.84637
87	43499	0.876	0.08226	0.0037		0.449734	3.0827
88	43999	1.076	0.08909	0.0044		0.552413	2.91384
89	44499	0.934	0.08421	0.0041		0.479511	2.98201
90	44999	0.964	0.08618	0.0042		0.494913	3.15329
91	45499	1.028	0.09113	0.0043		0.52777	3.08547
92	45999	0.974	0.08917	0.0043		0.500046	3.15398
93	46499	1.004	0.09115	0.0044		0.515448	3.15502
94	46999	0.966	0.09118	0.0043		0.495939	3.18685
95	47499	1.064	0.0921	0.0045		0.546252	3.18789
96	47999	1.024	0.09213	0.0046		0.525716	3.32595
97	48499	1.036	0.09612	0.0046		0.531877	3.36125
98	48999	1.012	0.09714	0.0045		0.519555	3.46367
99	49499	1.056	0.1001	0.0046		0.542145	3.4301
100	49999	1.02	0.09913	0.0046		0.523663	3.53253
101	50499	1.076	0.10209	0.0048		0.552413	3.46436
102	50999	1.032	0.10012	0.0047		0.529823	3.53356
103	51499	1.04	0.10212	0.0047		0.533931	3.56644
104	51999	1.094	0.10307	0.0048		0.561654	3.59965
105	52499	1.138	0.10403	0.0049		0.584243	3.56505
106	52999	1.136	0.10303	0.0049		0.583216	3.66851
107	53499	1.15	0.10602	0.005		0.590404	3.70311
108	53999	1.148	0.10702	0.005		0.589377	3.70242
109	54499	1.172	0.107	0.005		0.601699	3.77059
110	54999	1.212	0.10897	0.0052		0.622234	3.77059
111	55499	1.21	0.10897	0.0051		0.621208	3.70242
112	55999	1.178	0.107	0.0053		0.604779	3.8737
113	56499	1.24	0.11195	0.0054		0.63661	3.90796
114	56999	1.244	0.11294	0.0055		0.638663	3.93668
115	57499	1.444	0.11377	0.0062		0.741342	3.93841
116	57999	1.384	0.11382	0.0061		0.710538	3.97336
117	58499	1.374	0.11483	0.006		0.705404	3.94152
118	58999	1.284	0.11391	0.006		0.659199	4.04187
119	59499	1.4	0.11681	0.006		0.718753	4.07612
120	59999	1.412	0.1178	0.0063		0.724913	4.11073
121	60499	1.414	0.1188	0.0063		0.72594	4.14533
122	60999	1.412	0.1198	0.0064		0.724913	4.21315
123	61499	1.46	0.12176	0.0065		0.749556	4.2827
124	61999	1.452	0.12377	0.0065		0.745449	4.2474
125	62499	1.472	0.12275	0.0066		0.755717	4.11176
126	62999	1.38	0.11883	0.0062		0.708485	4.24775
127	63499	1.456	0.12276	0.0063		0.747503	4.52388
128	63999	1.48	0.13074	0.0065		0.759824	4.21488
129	64499	1.402	0.12181	0.0063		0.719779	4.45744
130	64999	1.384	0.12882	0.0066		0.710538	4.45294
131	65499	1.544	0.12869	0.0067		0.792682	4.55882
132	65999	1.476	0.13175	0.0068		0.757771	4.25052
133	66499	1.368	0.12284	0.0064		0.702324	4.59516
134	66999	1.41	0.1328	0.0067		0.723887	4.52561
135	67499	1.428	0.13079	0.0065		0.733128	4.73045
136	67999	1.514	0.13671	0.0073		0.77728	4.76471
137	68499	1.524	0.1377	0.0071		0.782414	4.76367
138	68999	1.568	0.13767	0.007		0.805003	4.69827
139	69499	1.436	0.13578	0.0067		0.737235	4.80069
140	69999	1.48	0.13874	0.0069		0.759824	4.79862
141	70499	1.552	0.13868	0.0075		0.796789	4.80069
142	70999	1.48	0.13874	0.007		0.759824	4.72664
143	71499	1.644	0.1366	0.0077		0.844021	4.9
144	71999	1.638	0.14161	0.0078		0.840941	5.13668
145	72499	1.822	0.14845	0.0085		0.935405	4.97128
146	72999	1.566	0.14367	0.0076		0.803976	5.07266
147	73499	1.644	0.1466	0.0077		0.844021	5.07405
148	73999	1.598	0.14664	0.0077		0.820405	5.14291
149	74499	1.61	0.14863	0.0077		0.826566	4.97059
150	74999	1.59	0.14365	0.0081		0.816298	5.21073
151	75499	1.656	0.15059	0.0081		0.850182	5.14394
152	75999	1.572	0.14866	0.0079		0.807057	5.30727
153	76499	1.904	0.15338	0.0094		0.977504	5.20588
154	76999	1.822	0.15045	0.0092		0.935405	5.37682
155	77499	1.892	0.15539	0.0093		0.971343	5.27405
156	77999	1.856	0.15242	0.009		0.952861	5.48028
157	78499	1.904	0.15838	0.0093		0.977504	5.37958
158	78999	1.8	0.15547	0.0092		0.924111	5.4474
159	79499	1.85	0.15743	0.0093		0.94978	5.48581
160	79999	1.716	0.15854	0.0091		0.880985	5.41626
161	80499	1.73	0.15653	0.0091		0.888173	5.55467
162	80999	1.73	0.16053	0.009		0.888173	5.55433
163	81499	1.736	0.16052	0.0091		0.891253	5.58824
164	81999	1.764	0.1615	0.0092		0.905628	5.62215
165	82499	1.788	0.16248	0.0092		0.91795	5.72526
166	82999	1.814	0.16546	0.0094		0.931298	5.65536
167	83499	1.838	0.16344	0.0094		0.94362	5.72249
168	83999	1.91	0.16538	0.0096		0.980584	5.791
169	84499	1.924	0.16736	0.0096		0.987772	5.79239
170	84999	1.886	0.1674	0.0098		0.968263	5.85917
171	85499	1.962	0.16933	0.0101		1.00728	5.85917
172	85999	1.962	0.16933	0.01		1.00728	5.89308
173	86499	1.99	0.17031	0.0102		1.02166	5.96055
174	86999	2.042	0.17226	0.0105		1.04835	6.02491
175	87499	2.218	0.17412	0.0117		1.13871	5.9917
176	87999	2.162	0.17316	0.0116		1.10996	6.02526
177	88499	2.198	0.17413	0.0118		1.12844	5.99377
178	88999	2.09	0.17322	0.0118		1.073	6.09412
179	89499	2.208	0.17612	0.0119		1.13358	5.99377
180	89999	2.096	0.17322	0.0118		1.07608	6.16471
181	90499	2.17	0.17816	0.0123		1.11407	6.26713
182	90999	2.208	0.18112	0.0123		1.13358	6.23149
183	91499	2.248	0.18009	0.0126		1.15411	6.40484
184	91999	2.24	0.1851	0.0125		1.15	6.23356
185	92499	2.182	0.18015	0.0126		1.12023	6.36886
186	92999	2.278	0.18406	0.0126		1.16951	6.54118
187	93499	2.312	0.18904	0.0128		1.18697	6.33702
188	93999	2.184	0.18314	0.0125		1.12125	6.54394
189	94499	2.216	0.18912	0.0127		1.13768	6.50761
190	94999	2.276	0.18807	0.0127		1.16849	6.5782
191	95499	2.222	0.19011	0.0128		1.14076	6.54221
192	95999	2.274	0.18907	0.0128		1.16746	6.54533
193	96499	2.17	0.18916	0.0129		1.11407	6.57924
194	96999	2.192	0.19014	0.0128		1.12536	6.71557
195	97499	2.26	0.19408	0.0131		1.16027	6.61107
196	97999	2.286	0.19106	0.0132		1.17362	6.68131
197	98499	2.246	0.19309	0.0133		1.15308	6.74879
198	98999	2.312	0.19504	0.0135		1.18697	6.81696
199	99499	2.338	0.19701	0.0137		1.20032	6.7827
200	99999	2.334	0.19602	0.0138		1.19826	6.78235
201	100499	2.336	0.19601	0.014		1.19929	6.98374
202	100999	2.548	0.20183	0.0148		1.30813	6.84602
203	101499	2.524	0.19785	0.0152		1.29581	6.94948
204	101999	2.536	0.20084	0.0152		1.30197	7.12284
205	102499	2.526	0.20585	0.0155		1.29684	7.0564
206	102999	2.434	0.20393	0.0153		1.2496	6.98754
207	103499	2.426	0.20194	0.0153		1.2455	7.09135
208	103999	2.426	0.20494	0.0154		1.2455	7.05502
209	104499	2.484	0.20389	0.0154		1.27527	7.19343
210	104999	2.484	0.20789	0.0157		1.27527	7.19412
211	105499	2.464	0.20791	0.0157		1.265	7.22734
212	105999	2.502	0.20887	0.0157		1.28451	7.26125
213	106499	2.526	0.20985	0.016		1.29684	7.29516
214	106999	2.558	0.21083	0.0162		1.31326	7.32872
215	107499	2.592	0.2118	0.0163		1.33072	7.39689
216	107999	2.628	0.21377	0.0168		1.3492	7.39896
217	108499	2.556	0.21383	0.0167		1.31224	7.43114
218	108999	2.63	0.21476	0.017		1.35023	7.49965
219	109499	2.656	0.21674	0.0171		1.36358	7.53391
220	109999	2.672	0.21773	0.0171		1.37179	7.49965
221	110499	2.658	0.21674	0.0173		1.3646	7.63495
222	110999	2.762	0.22065	0.0178		1.418	7.63668
223	111499	2.708	0.2207	0.0181		1.39027	7.67266
224	111999	2.664	0.22174	0.0182		1.36768	7.64048
225	112499	2.582	0.22081	0.0186		1.32559	7.67301
226	112999	2.644	0.22175	0.0189		1.35742	7.73633
227	113499	2.844	0.22358	0.0214		1.46009	7.74256
228	113999	2.636	0.22376	0.0206		1.35331	7.84602
229	114499	2.652	0.22675	0.0208		1.36152	7.91453
230	114999	2.668	0.22873	0.0209		1.36974	7.90796
231	115499	2.9	0.22854	0.0219		1.48884	8.0436
232	115999	2.988	0.23246	0.0222		1.53402	7.9173
233	116499	2.582	0.22881	0.0214		1.32559	8.01038
234	116999	2.944	0.2315	0.0224		1.51143	7.91176
235	117499	2.768	0.22865	0.0221		1.42108	8.08616
236	117999	2.716	0.23369	0.0218		1.39438	7.98201
237	118499	2.732	0.23068	0.0225		1.40259	8.08512
238	118999	2.754	0.23366	0.0224		1.41389	8.18789
239	119499	2.784	0.23663	0.0225		1.42929	8.18685
240	119999	2.824	0.2366	0.0227		1.44983	8.25467
241	120499	2.866	0.23856	0.0228		1.47139	8.25433
242	120999	2.886	0.23855	0.023		1.48166	8.3218
243	121499	2.942	0.2405	0.0234		1.51041	8.45813
244	121999	3.016	0.24444	0.0238		1.5484	8.35779
245	122499	2.896	0.24154	0.0236		1.48679	8.45917
246	122999	2.974	0.24447	0.0238		1.52684	8.45986
247	123499	2.952	0.24449	0.0239		1.51554	8.49308
248	123999	3.006	0.24545	0.0241		1.54326	8.49377
249	124499	2.982	0.24547	0.0241		1.53094	8.56125
250	124999	3.03	0.24742	0.0244		1.55559	8.5263
251	125499	3.05	0.24641	0.0247		1.56585	8.59446
252	125999	3.078	0.24838	0.0249		1.58023	8.62837
253	126499	3.112	0.24936	0.0254		1.59768	8.62976
254	126999	3.058	0.2494	0.0255		1.56996	8.73287
255	127499	3.082	0.25238	0.0256		1.58228	8.76713
256	127999	3.092	0.25337	0.0258		1.58742	8.80069
257	128499	3.134	0.25434	0.0261		1.60898	8.8346
258	128999	3.152	0.25532	0.0263		1.61822	8.86886
259	129499	3.164	0.25631	0.0265		1.62438	8.90311
260	129999	3.18	0.2573	0.0267		1.6326	8.93702
261	130499	3.2	0.25828	0.0269		1.64286	9.03841
262	130999	3.278	0.26121	0.0273		1.68291	9.01315
263	131499	2.962	0.26048	0.0323		1.52068	9.25225
264	131653	1.892	0.26739	0.0467		0.971343	9.03737
265	132153	0.966	0.26118	0.1362		0.495939	8.9699
266	132653	0.912	0.25923	0.1395		0.468216	8.93668
267	133153	0.864	0.25827	0.1409		0.443573	9.17647
268	133653	0.944	0.2652	0.1419		0.484645	9.27785
269	134153	1.02	0.26813	0.1448		0.523663	9.17647
270	134653	0.938	0.2652	0.1456		0.481564	9.24637
271	135153	0.916	0.26722	0.1456		0.47027	9.34983
272	135653	0.926	0.27021	0.1463		0.475404	9.28097
273	136153	0.922	0.26822	0.1461		0.47335	9.35052
274	136653	0.91	0.27023	0.1467		0.467189	9.35052
275	137153	0.902	0.27023	0.1474		0.463082	9.45398
276	137653	0.914	0.27322	0.1475		0.469243	9.38304
277	138153	0.978	0.27117	0.1541		0.5021	9.62491
278	138653	0.984	0.27816	0.1539		0.50518	9.48858
279	139153	0.918	0.27422	0.1539		0.471296	9.55779
280	139653	0.918	0.27622	0.1539		0.471296	9.62561
281	140153	0.968	0.27818	0.1546		0.496966	9.62076
282	140653	1.13	0.27804	0.1608		0.580136	9.72734
283	141153	1.034	0.28112	0.1605		0.53085	9.72907
284	141653	0.978	0.28117	0.1603		0.5021	9.76367
285	142153	0.98	0.28217	0.1603		0.503127	9.62284
286	142653	1.062	0.2781	0.1622		0.545225	9.86263
287	143153	1.142	0.28503	0.1631		0.586297	9.86609
288	143653	1.022	0.28513	0.1637		0.524689	0

## Sheet: E-10
Uniaxial indirect tensile test results report
Binary result file storage path :F:\ Wei Sijiang - Wang Chongyang \ Gypsum E-3-g.U-IT
F:\ Wei Sijiang - Wang Chongyang \ Gypsum E-3-g.t
Start time:	10:47:25,07/02/2019
Specimen type: cylinder	Diameter: 49.8	mm	Height: 28.7	mm
Related sensors:	Vertical force transducer, 100KN (Test piece vertical force
Vertical travel sensor of 50MM (vertical deformation of test parts)
Two horizontal displacement sensors of 2.5mm (lateral deformation of test pieces)
Steps: 1.	Control mode: stroke	Waveform: Slope
Rate: 0.0020	mm/s	Destination: 0.2580	mm
Set no.	Time (ms)	Vertical force (KN)	Vertical deformation (mm)	Transverse deformation (mm)			Axial strain
0	0	0	0	0		0	0.0341463
1	500	0.026	0.00098	-0.0002		0.0133483	0.0686411
2	1000	0.036	0.00197	-0.0002		0.0184822	0.0682927
3	1500	0.046	0.00196	-0.0001		0.0236162	0.102787
4	2000	0.058	0.00295	-0.0002		0.0297769	0.137282
5	2500	0.074	0.00394	-0.0002		0.0379912	0.136934
6	3000	0.086	0.00393	-0.0002		0.0441519	0.172125
7	3500	0.07	0.00494	-0.0003		0.0359376	0.241115
8	4000	0.096	0.00692	-0.0001		0.0492859	0.241812
9	4500	0.072	0.00694	-0.0003		0.0369644	0.310105
10	5000	0.12	0.0089	-0.0002		0.0616074	0.310105
11	5500	0.114	0.0089	-0.0001		0.058527	0.449129
12	6000	0.128	0.01289	-0.0002		0.0657145	0.378746
13	6500	0.152	0.01087	-0.0001		0.078036	0.448084
14	7000	0.166	0.01286	-0.0001		0.0852235	0.485017
15	7500	0.098	0.01392	-0.0003		0.0503127	0.519512
16	8000	0.104	0.01491	-0.0004		0.0533931	0.589199
17	8500	0.104	0.01691	-0.0004		0.0533931	0.518118
18	9000	0.154	0.01487	-0.0002		0.0790628	0.691638
19	9500	0.178	0.01985	-0.0002		0.0913843	0.689199
20	10000	0.254	0.01978	0.0001		0.130402	0.758188
21	10500	0.28	0.02176	0		0.143751	0.620557
22	11000	0.224	0.01781	-0.0001		0.115	0.897909
23	11500	0.266	0.02577	-0.0001		0.136563	0.829965
24	12000	0.214	0.02382	0		0.109866	0.829617
25	12500	0.22	0.02381	-0.0002		0.112947	0.899303
26	13000	0.22	0.02581	-0.0001		0.112947	0.899303
27	13500	0.228	0.02581	-0.0001		0.117054	0.933449
28	14000	0.248	0.02679	-0.0001		0.127322	1.07143
29	14500	0.296	0.03075	0.0001		0.151965	1.00279
30	15000	0.254	0.02878	0		0.130402	1.07108
31	15500	0.302	0.03074	0		0.155045	1.14077
32	16000	0.3	0.03274	0		0.154018	1.10244
33	16500	0.424	0.03164	0.0007		0.217679	1.177
34	17000	0.258	0.03378	-0.0001		0.132456	1.17666
35	17500	0.266	0.03377	-0.0002		0.136563	1.20697
36	18000	0.428	0.03464	0.0007		0.219733	1.20627
37	18500	0.452	0.03462	0.0006		0.232054	1.30976
38	19000	0.484	0.03759	0.0007		0.248483	1.30976
39	19500	0.476	0.03759	0.0008		0.244376	1.34425
40	20000	0.498	0.03858	0.0008		0.255671	1.41359
41	20500	0.508	0.04057	0.0008		0.260805	1.44739
42	21000	0.536	0.04154	0.0008		0.27518	1.48223
43	21500	0.538	0.04254	0.0009		0.276206	1.44704
44	22000	0.554	0.04153	0.001		0.284421	1.69199
45	22500	0.522	0.04856	0.0009		0.267992	1.38049
46	23000	0.448	0.03962	0.0007		0.230001	1.55017
47	23500	0.594	0.04449	0.0012		0.304956	1.61951
48	24000	0.616	0.04648	0.0013		0.316251	1.68885
49	24500	0.628	0.04847	0.0013		0.322412	1.723
50	25000	0.65	0.04945	0.0014		0.333707	1.72265
51	25500	0.654	0.04944	0.0013		0.33576	1.79164
52	26000	0.684	0.05142	0.0014		0.351162	1.79233
53	26500	0.654	0.05144	0.0014		0.33576	1.89547
54	27000	0.706	0.0544	0.0016		0.362457	1.89512
55	27500	0.716	0.05439	0.0015		0.367591	1.92962
56	28000	0.732	0.05538	0.0016		0.375805	1.92962
57	28500	0.734	0.05538	0.0016		0.376832	1.92997
58	29000	0.714	0.05539	0.0016		0.366564	2.13937
59	29500	0.704	0.0614	0.0016		0.36143	1.99895
60	30000	0.74	0.05737	0.0016		0.379912	2.20801
61	30500	0.744	0.06337	0.0017		0.381966	1.96481
62	31000	0.714	0.05639	0.0016		0.366564	2.17073
63	31500	0.818	0.0623	0.0019		0.419957	2.31115
64	32000	0.786	0.06633	0.0019		0.403528	2.17073
65	32500	0.82	0.0623	0.0019		0.420984	2.20418
66	33000	0.868	0.06326	0.0022		0.445627	2.30732
67	33500	0.914	0.06622	0.0024		0.469243	2.27317
68	34000	0.89	0.06524	0.0023		0.456921	2.30697
69	34500	0.928	0.06621	0.0025		0.47643	2.377
70	35000	0.912	0.06822	0.0024		0.468216	2.4108
71	35500	0.956	0.06919	0.0026		0.490805	2.41115
72	36000	0.942	0.0692	0.0024		0.483618	2.44704
73	36500	0.902	0.07023	0.0025		0.463082	2.62021
74	37000	0.94	0.0752	0.0027		0.482591	2.75854
75	37500	0.978	0.07917	0.0026		0.5021	2.65679
76	38000	0.878	0.07625	0.0025		0.450761	2.65575
77	38500	0.92	0.07622	0.0025		0.472323	2.65819
78	39000	0.84	0.07629	0.0024		0.431252	2.65714
79	39500	0.864	0.07626	0.0024		0.443573	2.76028
80	40000	0.914	0.07922	0.0025		0.469243	2.79024
81	40500	1.086	0.08008	0.0035		0.557547	2.68641
82	41000	1.056	0.0771	0.0033		0.542145	2.78815
83	41500	1.148	0.08002	0.0034		0.589377	2.89268
84	42000	1.148	0.08302	0.0034		0.589377	2.89233
85	42500	1.166	0.08301	0.0035		0.598618	2.96063
86	43000	1.206	0.08497	0.0036		0.619154	2.99512
87	43500	1.222	0.08596	0.0036		0.627368	3.02962
88	44000	1.23	0.08695	0.0037		0.631476	3.09965
89	44500	1.222	0.08896	0.0036		0.627368	3.10174
90	45000	1.158	0.08902	0.0037		0.594511	3.03206
91	45500	1.156	0.08702	0.0037		0.593484	3.1338
92	46000	1.25	0.08994	0.0039		0.641743	3.1676
93	46500	1.284	0.09091	0.0039		0.659199	3.13415
94	47000	1.238	0.08995	0.0038		0.635583	3.13519
95	47500	1.2	0.08998	0.0039		0.616074	3.44599
96	48000	1.294	0.0989	0.0039		0.664333	3.30383
97	48500	1.382	0.09482	0.0043		0.709512	3.37317
98	49000	1.398	0.09681	0.0044		0.717726	3.40767
99	49500	1.406	0.0978	0.0043		0.721833	3.37561
100	50000	1.322	0.09688	0.0043		0.678708	3.44216
101	50500	1.418	0.09879	0.0045		0.727994	3.477
102	51000	1.428	0.09979	0.0046		0.733128	3.40871
103	51500	1.372	0.09783	0.0044		0.704378	3.4439
104	52000	1.366	0.09884	0.0046		0.701297	3.823
105	52500	1.502	0.10972	0.0048		0.771119	3.64808
106	53000	1.524	0.1047	0.0049		0.782414	3.54739
107	53500	1.402	0.10181	0.0048		0.719779	3.71847
108	54000	1.508	0.10672	0.005		0.774199	3.68467
109	54500	1.472	0.10575	0.005		0.755717	3.71847
110	55000	1.51	0.10672	0.0051		0.775226	3.82334
111	55500	1.492	0.10973	0.0051		0.765985	3.75261
112	56000	1.528	0.1077	0.005		0.784467	4.09965
113	56500	1.574	0.11766	0.0053		0.808083	3.8554
114	57000	1.582	0.11065	0.0051		0.812191	3.88955
115	57500	1.61	0.11163	0.0054		0.826566	4.20244
116	58000	1.64	0.12061	0.0054		0.841967	4.09721
117	58500	1.66	0.11759	0.0055		0.852235	4.30523
118	59000	1.688	0.12356	0.0056		0.86661	4.26794
119	59500	1.774	0.12249	0.006		0.910762	4.09512
120	60000	1.734	0.11753	0.0059		0.890227	4.12962
121	60500	1.744	0.11852	0.006		0.89536	4.19826
122	61000	1.776	0.12049	0.006		0.911789	4.23275
123	61500	1.786	0.12148	0.006		0.916923	4.2324
124	62000	1.804	0.12147	0.0061		0.926164	4.2676
125	62500	1.79	0.12248	0.0061		0.918977	4.26864
126	63000	1.75	0.12251	0.0061		0.898441	4.37108
127	63500	1.82	0.12545	0.0062		0.934378	4.40488
128	64000	1.862	0.12642	0.0063		0.955941	4.43937
129	64500	1.864	0.12741	0.0063		0.956968	4.37213
130	65000	1.782	0.12548	0.0064		0.914869	4.47352
131	65500	1.898	0.12839	0.0066		0.974423	4.43972
132	66000	1.858	0.12742	0.0065		0.953887	4.54948
133	66500	1.68	0.13057	0.0062		0.862503	4.47526
134	67000	1.832	0.12844	0.0065		0.940539	4.5108
135	67500	1.814	0.12946	0.0065		0.931298	4.64599
136	68000	1.954	0.13334	0.0068		1.00317	4.57805
137	68500	1.89	0.13139	0.0068		0.970316	4.71429
138	69000	1.996	0.1353	0.0069		1.02474	4.71638
139	69500	1.93	0.13536	0.007		0.990852	4.75052
140	70000	1.956	0.13634	0.007		1.0042	4.75017
141	70500	1.964	0.13633	0.0072		1.00831	4.99164
142	71000	2.05	0.14326	0.0073		1.05246	4.81916
143	71500	1.984	0.13831	0.0072		1.01858	4.81916
144	72000	1.99	0.13831	0.0073		1.02166	4.95505
145	72500	2.106	0.14221	0.0075		1.08121	4.88676
146	73000	2.06	0.14025	0.0075		1.05759	5.09338
147	73500	2.136	0.14618	0.0076		1.09661	5.02334
148	74000	2.148	0.14417	0.0076		1.10277	5.23554
149	74500	2.042	0.15026	0.0076		1.04835	5.2669
150	75000	2.162	0.15116	0.0078		1.10996	5.02509
151	75500	2.092	0.14422	0.0078		1.07402	5.09652
152	76000	2.036	0.14627	0.0077		1.04527	5.3
153	76500	2.222	0.15211	0.0078		1.14076	5.16202
154	77000	2.174	0.14815	0.008		1.11612	5.16272
155	77500	2.152	0.14817	0.008		1.10483	5.36899
156	78000	2.246	0.15409	0.0081		1.15308	5.37213
157	78500	2.142	0.15418	0.0081		1.09969	5.47631
158	79000	2.154	0.15717	0.0082		1.10585	5.50941
159	79500	2.208	0.15812	0.0082		1.13358	5.47456
160	80000	2.216	0.15712	0.0081		1.13768	5.4777
161	80500	2.106	0.15721	0.0082		1.08121	5.57909
162	81000	2.206	0.16012	0.0083		1.13255	5.61324
163	81500	2.236	0.1611	0.0084		1.14795	5.64704
164	82000	2.264	0.16207	0.0084		1.16233	5.64669
165	82500	2.284	0.16206	0.0085		1.17259	5.71603
166	83000	2.292	0.16405	0.0086		1.1767	5.78502
167	83500	2.316	0.16603	0.0087		1.18902	5.74983
168	84000	2.334	0.16502	0.0087		1.19826	5.81986
169	84500	2.312	0.16703	0.0089		1.18697	5.78432
170	85000	2.346	0.16601	0.009		1.20442	5.85645
171	85500	2.256	0.16808	0.0094		1.15822	5.923
172	86000	2.364	0.16999	0.0097		1.21367	5.9223
173	86500	2.386	0.16997	0.0096		1.22496	6.02474
174	87000	2.46	0.17291	0.0099		1.26295	5.81707
175	87500	2.416	0.16695	0.01		1.24036	6.06028
176	88000	2.44	0.17393	0.0101		1.25268	6.09512
177	88500	2.434	0.17493	0.0101		1.2496	6.09408
178	89000	2.47	0.1749	0.0101		1.26809	6.16307
179	89500	2.494	0.17688	0.0102		1.28041	6.16272
180	90000	2.506	0.17687	0.0103		1.28657	6.19686
181	90500	2.526	0.17785	0.0104		1.29684	6.26585
182	91000	2.552	0.17983	0.0106		1.31018	6.30035
183	91500	2.568	0.18082	0.0106		1.3184	6.3
184	92000	2.57	0.18081	0.0107		1.31942	6.36934
185	92500	2.592	0.1828	0.0109		1.33072	6.40348
186	93000	2.612	0.18378	0.011		1.34099	6.40314
187	93500	2.624	0.18377	0.011		1.34715	6.47213
188	94000	2.65	0.18575	0.0112		1.3605	6.50627
189	94500	2.668	0.18673	0.0114		1.36974	6.47178
190	95000	2.66	0.18574	0.0114		1.36563	6.57631
191	95500	2.662	0.18874	0.0115		1.36666	6.57526
192	96000	2.696	0.18871	0.0117		1.38411	6.64425
193	96500	2.714	0.19069	0.0118		1.39335	6.60941
194	97000	2.722	0.18969	0.0118		1.39746	6.71359
195	97500	2.732	0.19268	0.0121		1.40259	6.71568
196	98000	2.658	0.19274	0.0125		1.3646	6.81742
197	98500	2.752	0.19566	0.0125		1.41286	6.78118
198	99000	2.798	0.19462	0.0126		1.43648	6.82021
199	99500	2.658	0.19574	0.013		1.3646	6.88746
200	100000	2.742	0.19767	0.013		1.40773	6.88676
201	100500	2.762	0.19765	0.013		1.418	6.95575
202	101000	2.79	0.19963	0.0132		1.43237	6.91986
203	101500	2.826	0.1986	0.0133		1.45085	6.9892
204	102000	2.834	0.20059	0.0136		1.45496	7.02404
205	102500	2.84	0.20159	0.0137		1.45804	7.19199
206	103000	3.046	0.20641	0.0143		1.5638	7.12578
207	103500	2.932	0.20451	0.0143		1.50527	7.09617
208	104000	2.752	0.20366	0.0146		1.41286	7.23136
209	104500	2.898	0.20754	0.0149		1.48782	7.23171
210	105000	2.88	0.20755	0.0149		1.47858	7.2676
211	105500	2.846	0.20858	0.0149		1.46112	7.23519
212	106000	2.768	0.20765	0.0151		1.42108	7.23728
213	106500	2.692	0.20771	0.017		1.38206	7.47247
214	107000	2.986	0.21446	0.0182		1.533	7.37038
215	107500	2.9	0.21153	0.0182		1.48884	7.50418
216	108000	3.088	0.21537	0.0185		1.58536	7.37038
217	108500	2.906	0.21153	0.0185		1.49193	7.36794
218	109000	2.992	0.21146	0.0186		1.53608	7.47178
219	109500	3.014	0.21444	0.0187		1.54737	7.74983
220	110000	3.034	0.22242	0.0189		1.55764	7.51777
221	110500	2.634	0.21576	0.0182		1.35228	7.64983
222	111000	2.882	0.21955	0.0189		1.4796	7.54808
223	111500	2.784	0.21663	0.0189		1.42929	7.68467
224	112000	2.88	0.22055	0.0189		1.47858	7.78955
225	112500	2.874	0.22356	0.019		1.4755	7.75296
226	113000	2.928	0.22251	0.019		1.50322	7.85679
227	113500	2.95	0.22549	0.019		1.51451	7.82125
228	114000	2.97	0.22447	0.0191		1.52478	7.95923
229	114500	3.024	0.22843	0.0192		1.55251	7.88955
230	115000	3.028	0.22643	0.0192		1.55456	7.91882
231	115500	3.214	0.22727	0.0196		1.65005	8.02718
232	116000	3.084	0.23038	0.0197		1.58331	7.99233
233	116500	3.084	0.22938	0.0197		1.58331	8.06132
234	117000	3.106	0.23136	0.0198		1.5946	8.06098
235	117500	3.122	0.23135	0.0198		1.60282	8.12962
236	118000	3.154	0.23332	0.0199		1.61925	8.16341
237	118500	3.184	0.23429	0.0199		1.63465	8.16307
238	119000	3.194	0.23428	0.02		1.63978	8.22927
239	119500	3.322	0.23618	0.0204		1.7055	8.30279
240	120000	3.188	0.23829	0.0205		1.6367	8.33484
241	120500	3.282	0.23921	0.0206		1.68496	8.30209
242	121000	3.214	0.23827	0.0207		1.65005	8.44007
243	121500	3.262	0.24223	0.0213		1.67469	8.40627
244	122000	3.22	0.24126	0.0211		1.65313	8.43868
245	122500	3.308	0.24219	0.0212		1.69831	8.43902
246	123000	3.298	0.2422	0.0213		1.69318	8.50627
247	123500	3.378	0.24413	0.0216		1.73425	8.54146
248	124000	3.36	0.24514	0.0217		1.72501	8.57491
249	124500	3.406	0.2461	0.022		1.74862	8.6115
250	125000	3.358	0.24715	0.0221		1.72398	8.67875
251	125500	3.432	0.24908	0.0225		1.76197	8.6446
252	126000	3.406	0.2481	0.0227		1.74862	8.6453
253	126500	3.384	0.24812	0.0245		1.73733	8.74913
254	126578	2.24	0.2511	0.0355		1.15	8.74251
255	127078	1.276	0.25091	0.125		0.655092	8.84669
256	127578	1.296	0.2539	0.1298		0.66536	8.84774
257	128078	1.26	0.25393	0.1312		0.646877	8.91603
258	128578	1.304	0.25589	0.134		0.669467	9.08641
259	129078	1.44	0.26078	0.1435		0.739288	9.05679
260	129578	1.258	0.25993	0.143		0.645851	9.02265
261	130078	1.24	0.25895	0.1433		0.63661	9.02195
262	130578	1.254	0.25893	0.1442		0.643797	8.9899
263	131078	1.166	0.25801	0.1486		0.598618	0

## Sheet: E-14
Uniaxial indirect tensile test results report
Binary result file storage path :F:\ Wei Sijiang - Wang Chongyang \ Gypsum E-3-g.U-IT
F:\ Wei Sijiang - Wang Chongyang \ Gypsum E-3-g.t
Start time:	10:47:25,07/02/2019
Specimen type: cylinder	Diameter: 49.7	mm	Height: 28.2	mm
Related sensors:	Vertical force transducer, 100KN (Test piece vertical force
Vertical travel sensor of 50MM (vertical deformation of test parts)
Two horizontal displacement sensors of 2.5mm (lateral deformation of test pieces)
Steps: 1.	Control mode: stroke	Waveform: Slope
Rate: 0.0020	mm/s	Destination: 0.2441	mm
Set no.	Time (ms)	Vertical force (KN)	Vertical deformation (mm)	Transverse deformation (mm)			Axial strain
2	1000	0	0.001	0		0	0.0702128
3	1500	0.024	0.00198	0		0.0123711	0.105319
4	2000	0.032	0.00297	0		0.0164948	0.140071
5	2500	0.06	0.00395	0.0001		0.0309278	0.210638
6	3000	0.066	0.00594	0.0002		0.0340205	0.210638
7	3500	0.068	0.00594	0.0002		0.0350515	0.280851
8	4000	0.096	0.00792	0.0003		0.0494844	0.315957
9	4500	0.112	0.00891	0.0002		0.0577318	0.351064
10	5000	0.124	0.0099	0.0003		0.0639174	0.385816
11	5500	0.146	0.01088	0.0004		0.0752576	0.350709
12	6000	0.136	0.00989	0.0003		0.0701029	0.491844
13	6500	0.156	0.01387	0.0004		0.0804122	0.490426
14	7000	0.196	0.01383	0.0005		0.101031	0.560993
15	7500	0.212	0.01582	0.0006		0.109278	0.49078
16	8000	0.186	0.01384	0.0005		0.0958761	0.561348
17	8500	0.204	0.01583	0.0006		0.105154	0.596099
18	9000	0.224	0.01681	0.0006		0.115464	0.665957
19	9500	0.264	0.01878	0.0006		0.136082	0.630851
20	10000	0.248	0.01779	0.0006		0.127835	0.701064
21	10500	0.268	0.01977	0.0007		0.138144	0.73617
22	11000	0.282	0.02076	0.0007		0.145361	0.736879
23	11500	0.262	0.02078	0.0008		0.135051	0.841844
24	12000	0.304	0.02374	0.0009		0.156701	0.87695
25	12500	0.314	0.02473	0.0009		0.161855	0.87695
26	13000	0.314	0.02473	0.0007		0.161855	0.946809
27	13500	0.35	0.0267	0.0009		0.180412	0.946454
28	14000	0.364	0.02669	0.0009		0.187628	0.98156
29	14500	0.372	0.02768	0.001		0.191752	0.98156
30	15000	0.372	0.02768	0.001		0.191752	1.05284
31	15500	0.362	0.02969	0.0011		0.186598	1.01738
32	16000	0.364	0.02869	0.001		0.187628	1.1578
33	16500	0.416	0.03265	0.0012		0.214433	1.1227
34	17000	0.4	0.03166	0.0011		0.206185	1.19362
35	17500	0.402	0.03366	0.0011		0.207216	1.22837
36	18000	0.426	0.03464	0.0012		0.219587	1.29787
37	18500	0.466	0.0366	0.0013		0.240206	1.26312
38	19000	0.452	0.03562	0.0012		0.232989	1.33404
39	19500	0.448	0.03762	0.0012		0.230927	1.33333
40	20000	0.476	0.0376	0.0014		0.24536	1.36915
41	20500	0.46	0.03861	0.0014		0.237113	1.40355
42	21000	0.492	0.03958	0.0014		0.253608	1.4383
43	21500	0.516	0.04056	0.0015		0.265979	1.50887
44	22000	0.536	0.04255	0.0016		0.276288	1.50851
45	22500	0.538	0.04254	0.0015		0.277319	1.54326
46	23000	0.564	0.04352	0.0016		0.290721	1.57943
47	23500	0.54	0.04454	0.0015		0.27835	1.75638
48	24000	0.55	0.04953	0.0016		0.283505	1.68475
49	24500	0.58	0.04751	0.0018		0.298968	1.7195
50	25000	0.598	0.04849	0.0018		0.308247	1.7195
51	25500	0.606	0.04849	0.0017		0.31237	1.75461
52	26000	0.616	0.04948	0.0018		0.317525	1.82518
53	26500	0.622	0.05147	0.0018		0.320618	1.85993
54	27000	0.648	0.05245	0.0019		0.33402	1.82482
55	27500	0.636	0.05146	0.0019		0.327834	1.89468
56	28000	0.676	0.05343	0.002		0.348453	1.92979
57	28500	0.688	0.05442	0.002		0.354638	2.03546
58	29000	0.706	0.0574	0.002		0.363917	1.99965
59	29500	0.714	0.05639	0.0021		0.36804	1.99929
60	30000	0.728	0.05638	0.0021		0.375257	2.07057
61	30500	0.716	0.05839	0.0022		0.369071	2.10461
62	31000	0.766	0.05935	0.0022		0.394845	2.42163
63	31500	0.836	0.06829	0.0024		0.430927	2.17482
64	32000	0.792	0.06133	0.0023		0.408247	2.27872
65	32500	0.866	0.06426	0.0024		0.446391	2.27943
66	33000	0.85	0.06428	0.0024		0.438143	2.35035
67	33500	0.852	0.06628	0.0024		0.439174	2.31489
68	34000	0.848	0.06528	0.0024		0.437112	2.42128
69	34500	0.852	0.06828	0.0025		0.439174	2.4195
70	35000	0.902	0.06823	0.0026		0.464947	2.42057
71	35500	0.872	0.06826	0.0025		0.449484	2.45567
72	36000	0.884	0.06925	0.0025		0.455669	2.52589
73	36500	0.91	0.07123	0.0027		0.469071	2.49043
74	37000	0.906	0.07023	0.0027		0.467009	2.55993
75	37500	0.95	0.07219	0.0028		0.48969	2.66525
76	38000	0.99	0.07516	0.0029		0.510308	2.66525
77	38500	0.992	0.07516	0.0029		0.511339	2.73475
78	39000	1.036	0.07712	0.003		0.534019	2.73475
79	39500	1.036	0.07712	0.0031		0.534019	2.73723
80	40000	0.954	0.07719	0.0032		0.491752	2.87482
81	40500	1.1	0.08107	0.0032		0.567009	2.80426
82	41000	1.08	0.07908	0.0032		0.5567	2.87624
83	41500	1.052	0.08111	0.0033		0.542267	2.90993
84	42000	1.108	0.08206	0.0033		0.571133	2.94574
85	42500	1.1	0.08307	0.0033		0.567009	2.94539
86	43000	1.104	0.08306	0.0035		0.569071	3.01525
87	43500	1.142	0.08503	0.0035		0.588659	2.9461
88	44000	1.082	0.08308	0.0032		0.557731	3.2266
89	44500	1.184	0.09099	0.0035		0.610308	3.08794
90	45000	1.084	0.08708	0.0036		0.558762	3.0156
91	45500	1.126	0.08504	0.0037		0.580411	3.36738
92	46000	1.22	0.09496	0.0038		0.628865	3.22447
93	46500	1.258	0.09093	0.0038		0.648452	3.4039
94	47000	1.194	0.09599	0.0037		0.615463	3.19113
95	47500	1.194	0.08999	0.0037		0.615463	3.2273
96	48000	1.16	0.09101	0.0038		0.597937	3.26206
97	48500	1.192	0.09199	0.0039		0.614432	3.40319
98	49000	1.214	0.09597	0.0039		0.625772	3.4039
99	49500	1.19	0.09599	0.0039		0.613401	3.40177
100	50000	1.264	0.09593	0.0039		0.651545	3.54362
101	50500	1.26	0.09993	0.0041		0.649483	3.43794
102	51000	1.24	0.09695	0.004		0.639174	3.6156
103	51500	1.23	0.10196	0.004		0.634019	3.6844
104	52000	1.29	0.1039	0.0041		0.664947	3.75496
105	52500	1.302	0.10589	0.0042		0.671133	3.68511
106	53000	1.272	0.10392	0.0041		0.655669	3.75035
107	53500	1.462	0.10576	0.0049		0.753607	3.81986
108	54000	1.51	0.10772	0.0051		0.778349	3.71702
109	54500	1.392	0.10482	0.005		0.717524	3.89007
110	55000	1.536	0.1097	0.0051		0.791751	3.75213
111	55500	1.406	0.10581	0.005		0.724741	3.89255
112	56000	1.446	0.10977	0.005		0.745359	3.8578
113	56500	1.422	0.10879	0.0051		0.732988	4.10532
114	57000	1.452	0.11577	0.0051		0.748452	3.92872
115	57500	1.424	0.11079	0.0049		0.734019	3.9273
116	58000	1.468	0.11075	0.0051		0.756699	4.10567
117	58500	1.432	0.11578	0.005		0.738143	4.13972
118	59000	1.486	0.11674	0.0052		0.765978	4.14043
119	59500	1.462	0.11676	0.0051		0.753607	3.9273
120	60000	1.474	0.11075	0.0051		0.759792	4.34929
121	60500	1.592	0.12265	0.0054		0.820617	4.31277
122	61000	1.622	0.12162	0.0053		0.836081	4.34858
123	61500	1.61	0.12263	0.0057		0.829895	4.31064
124	62000	1.696	0.12156	0.0058		0.874225	4.13865
125	62500	1.524	0.11671	0.0056		0.785565	4.3156
126	63000	1.536	0.1217	0.0056		0.791751	4.38652
127	63500	1.536	0.1237	0.0055		0.791751	4.38865
128	64000	1.458	0.12376	0.0055		0.751545	4.4578
129	64500	1.524	0.12571	0.0057		0.785565	4.34645
130	65000	1.682	0.12257	0.006		0.867008	4.66489
131	65500	1.708	0.13155	0.0062		0.88041	4.69929
132	66000	1.742	0.13252	0.0062		0.897936	4.59574
133	66500	1.646	0.1296	0.0061		0.848452	4.59645
134	67000	1.63	0.12962	0.006		0.840204	4.72979
135	67500	1.91	0.13338	0.007		0.984534	4.6266
136	68000	1.802	0.13047	0.0069		0.928864	4.94362
137	68500	1.87	0.13941	0.0069		0.963915	4.79681
138	69000	2.034	0.13527	0.0073		1.04845	4.86773
139	69500	2.032	0.13727	0.0073		1.04742	5.15213
140	70000	2.008	0.14529	0.0074		1.03505	4.8344
141	70500	1.964	0.13633	0.0072		1.01237	4.9383
142	71000	2.044	0.13926	0.0076		1.05361	5.11738
143	71500	1.992	0.14431	0.0076		1.0268	5.01383
144	72000	1.9	0.14139	0.0076		0.979379	5.01525
145	72500	1.844	0.14143	0.0072		0.950513	5.15461
146	73000	1.934	0.14536	0.0073		0.996905	5.1195
147	73500	1.924	0.14437	0.0077		0.99175	5.1922
148	74000	1.854	0.14642	0.0074		0.955668	5.01312
149	74500	1.924	0.14137	0.0076		0.99175	5.36277
150	75000	2.086	0.15123	0.008		1.07526	5.29716
151	75500	1.908	0.14938	0.0078		0.983503	5.25532
152	76000	2.122	0.1482	0.0082		1.09381	5.36241
153	76500	2.092	0.15122	0.0086		1.07835	5.28865
154	77000	2.186	0.14914	0.0085		1.1268	5.39291
155	77500	2.262	0.15208	0.0091		1.16598	5.39468
156	78000	2.196	0.15213	0.009		1.13196	5.32624
157	78500	2.118	0.1502	0.009		1.09175	5.60426
158	79000	2.306	0.15804	0.0093		1.18866	5.46596
159	79500	2.186	0.15414	0.0092		1.1268	5.6805
160	80000	2.136	0.16019	0.0091		1.10103	5.50319
161	80500	2.134	0.15519	0.0092		1.1	5.53582
162	81000	2.222	0.15611	0.0094		1.14536	5.74362
163	81500	2.384	0.16197	0.0098		1.22886	5.81383
164	82000	2.416	0.16395	0.0098		1.24536	5.67766
165	82500	2.228	0.16011	0.0096		1.14845	5.88794
166	83000	2.304	0.16604	0.0099		1.18763	5.67624
167	83500	2.276	0.16007	0.0098		1.17319	5.78369
168	84000	2.24	0.1631	0.0099		1.15464	5.74539
169	84500	2.332	0.16202	0.0099		1.20206	6.06525
170	85000	2.302	0.17104	0.0099		1.1866	5.98865
171	85500	2.5	0.16888	0.0104		1.28866	5.95496
172	86000	2.434	0.16793	0.0107		1.25464	5.9922
173	86500	2.372	0.16898	0.011		1.22268	6.12872
174	87000	2.548	0.17283	0.0114		1.3134	6.09645
175	87500	2.45	0.17192	0.0114		1.26288	6.09539
176	88000	2.48	0.17189	0.0115		1.27835	6.16312
177	88500	2.594	0.1738	0.0118		1.33711	6.16631
178	89000	2.482	0.17389	0.0116		1.27938	6.26773
179	89500	2.652	0.17675	0.012		1.36701	6.19929
180	90000	2.564	0.17482	0.0118		1.32165	6.33901
181	90500	2.64	0.17876	0.012		1.36082	6.41064
182	91000	2.618	0.18078	0.0121		1.34948	6.3383
183	91500	2.662	0.17874	0.0121		1.37216	6.37624
184	92000	2.578	0.17981	0.0124		1.32886	6.3727
185	92500	2.694	0.17971	0.0122		1.38866	6.41099
186	93000	2.598	0.18079	0.0126		1.33917	6.58936
187	93500	2.568	0.18582	0.0128		1.32371	6.55
188	94000	2.696	0.18471	0.0128		1.38969	6.55142
189	94500	2.642	0.18475	0.0127		1.36185	6.69681
190	95000	2.536	0.18885	0.0128		1.30721	6.66064
191	95500	2.554	0.18783	0.0132		1.31649	6.66099
192	96000	2.542	0.18784	0.013		1.31031	6.90355
193	96500	2.736	0.19468	0.0133		1.41031	6.62199
194	97000	2.662	0.18674	0.0135		1.37216	6.87128
195	97500	2.626	0.19377	0.0133		1.35361	6.80213
196	98000	2.562	0.19182	0.0131		1.32062	6.87128
197	98500	2.63	0.19377	0.0133		1.35567	6.90816
198	99000	2.574	0.19481	0.0138		1.3268	6.97624
199	99500	2.668	0.19673	0.0137		1.37525	6.94078
200	100000	2.67	0.19573	0.0137		1.37629	7.07979
201	100500	2.77	0.19965	0.0139		1.42783	7.03511
202	101000	3.072	0.19839	0.0147		1.5835	6.93759
203	101500	2.78	0.19564	0.016		1.43299	7.04113
204	102000	2.874	0.19856	0.0172		1.48144	7.11206
205	102500	2.876	0.20056	0.0172		1.48247	7.1461
206	103000	2.916	0.20152	0.0178		1.50309	7.18191
207	103500	2.904	0.20253	0.0179		1.4969	7.14787
208	104000	2.864	0.20157	0.0179		1.47629	7.28759
209	104500	2.926	0.20551	0.0179		1.50824	7.42943
210	105000	2.932	0.20951	0.018		1.51134	7.4305
211	105500	2.898	0.20954	0.018		1.49381	7.43262
212	106000	2.83	0.2096	0.018		1.45876	7.50177
213	106500	2.886	0.21155	0.0181		1.48763	7.5039
214	107000	2.812	0.21161	0.018		1.44948	7.53901
215	107500	2.82	0.2126	0.0181		1.45361	7.57234
216	108000	2.89	0.21354	0.0182		1.48969	7.57128
217	108500	2.934	0.21351	0.0183		1.51237	7.60461
218	109000	2.998	0.21445	0.0186		1.54536	7.67482
219	109500	3.028	0.21643	0.0188		1.56082	7.70957
220	110000	3.052	0.21741	0.0189		1.57319	7.70709
221	110500	3.136	0.21734	0.019		1.61649	7.74433
222	111000	3.07	0.21839	0.0197		1.58247	7.74681
223	111500	2.984	0.21846	0.0193		1.53814	7.7805
224	112000	3.042	0.21941	0.0194		1.56804	7.85142
225	112500	3.048	0.22141	0.0197		1.57113	7.91844
226	113000	3.18	0.2233	0.02		1.63917	8.02447
227	113500	3.186	0.22629	0.0202		1.64226	8.02482
228	114000	3.18	0.2263	0.0202		1.63917	7.99007
229	114500	3.154	0.22532	0.0202		1.62577	7.99255
230	115000	3.068	0.22539	0.0201		1.58144	8.06277
231	115500	3.096	0.22737	0.0204		1.59587	8.0266
232	116000	3.124	0.22635	0.0205		1.61031	8.13191
233	116500	3.15	0.22932	0.0207		1.62371	8.13262
234	117000	3.126	0.22934	0.0208		1.61134	8.13156
235	117500	3.164	0.22931	0.0212		1.63092	8.23723
236	118000	3.194	0.23229	0.0215		1.64639	8.23759
237	118500	3.18	0.2323	0.0217		1.63917	8.3078
238	119000	3.206	0.23428	0.0221		1.65257	8.34255
239	119500	3.222	0.23526	0.0233		1.66082	8.37305
240	119604	2.216	0.23612	0.0354		1.14227	8.43688
241	120104	1.268	0.23792	0.1104		0.653607	8.47376
242	120604	1.228	0.23896	0.1151		0.632988	8.50957
243	121104	1.216	0.23997	0.1179		0.626803	8.44007
244	121604	1.16	0.23801	0.1217		0.597937	8.58121
245	122104	1.194	0.24199	0.1237		0.615463	8.62128
246	122604	1.034	0.24312	0.138		0.532989	8.65071
247	123104	1.236	0.24395	0.1462		0.637112	8.65496
248	123604	1.096	0.24407	0.1469		0.564947	8.75887
249	124104	1.182	0.247	0.1481		0.609277	8.65496
250	124604	1.092	0.24407	0.1485		0.562885	0
