# Supplementary material for: Physical and Mechanical Properties of Gypsum‐Like Rock Materials
Source: Hindawi journal article supplement (doi:10.1155/2020/3703706), 2020-01-01
Supplement: f1 [file 3703706.f1.zip › 3703706.f1/high temperature triaxial compression test data.xlsx]

## Sheet: GB-3-9
Force (large)	--	journey	) Results Report
17:21:53,06/23/2019
Diameter: 49.4	mm	Height: 99.9	mm
Vertical force transducer (Test piece vertical force)
Control mode: force/confining pressure	Waveform: Slope
KN/s	Force the finish: 17.880	KN	Confining pressure rate :0.500	MPa/s	End point of confining pressure :9.0050	MPa
Time (ms)	Vertical force (KN)	Vertical deformation (mm)	Confining pressure (MPa)		stress	Axial strain	Lateral strain
0	0	0	0		0	0	0
200	0	-0.002	0		0	-0.02002	0
401	0.02	-0.001	0		0.0104349	-0.01001	0
601	0.16	-0.002	0.01		0.0834788	-0.02002	0.202429
801	0.4	-0.001	0.014		0.208697	-0.01001	0.283401
1003	0.64	-0.001	0.023		0.333915	-0.01001	0.465587
1204	0.78	0	0.041		0.406959	0	0.82996
1404	0.9	0.001	0.06		0.469568	0.01001	1.21457
1605	1.1	0.002	0.079		0.573917	0.02002	1.59919
1805	1.4	0.006	0.111		0.73044	0.0600601	2.24696
2005	1.62	0.011	0.166		0.845223	0.11011	3.36032
2206	1.78	0.02	0.216		0.928702	0.2002	4.37247
2406	1.94	0.026	0.266		1.01218	0.26026	5.38462
2607	2.04	0.033	0.305		1.06435	0.33033	6.17409
2807	2.36	0.05	0.34		1.23131	0.500501	6.88259
3007	2.5	0.064	0.377		1.30436	0.640641	7.63158
3208	2.68	0.075	0.401		1.39827	0.750751	8.11741
3408	3.14	0.091	0.413		1.63827	0.910911	8.36032
3609	3.46	0.103	0.436		1.80523	1.03103	8.82591
3809	3.56	0.116	0.454		1.8574	1.16116	9.19028
4009	3.72	0.122	0.481		1.94088	1.22122	9.73684
4211	3.86	0.128	0.508		2.01393	1.28128	10.2834
4412	4.04	0.134	0.557		2.10784	1.34134	11.2753
4612	4.2	0.141	0.631		2.19132	1.41141	12.7733
4813	4.34	0.148	0.76		2.26436	1.48148	15.3846
5013	4.54	0.153	0.998		2.36871	1.53153	20.2024
5213	4.82	0.161	1.53		2.5148	1.61161	30.9717
5414	5.12	0.169	2.22		2.67132	1.69169	44.9393
5614	5.34	0.177	2.534		2.7861	1.77177	51.2955
5815	5.44	0.181	2.668		2.83828	1.81181	54.0081
6015	5.64	0.182	3		2.94263	1.82182	60.7287
6215	5.8	0.188	3.092		3.02611	1.88188	62.5911
6416	6.1	0.188	3.167		3.18263	1.88188	64.1093
6616	6.2	0.194	3.266		3.2348	1.94194	66.1134
6817	6.42	0.201	3.37		3.34959	2.01201	68.2186
7017	6.58	0.207	3.471		3.43307	2.07207	70.2632
7217	6.76	0.211	3.571		3.52698	2.11211	72.2874
7419	7	0.215	3.671		3.6522	2.15215	74.3117
7620	7.26	0.22	3.768		3.78785	2.2022	76.2753
7820	7.46	0.225	3.874		3.8922	2.25225	78.4211
8021	7.6	0.23	3.972		3.96524	2.3023	80.4049
8221	7.84	0.234	4.073		4.09046	2.34234	82.4494
8421	8.04	0.239	4.171		4.19481	2.39239	84.4332
8622	8.26	0.244	4.273		4.30959	2.44244	86.498
8822	8.46	0.248	4.372		4.41394	2.48248	88.502
9023	8.72	0.252	4.474		4.54959	2.52252	90.5668
9223	8.86	0.257	4.569		4.62264	2.57257	92.4899
9423	9.1	0.261	4.673		4.74786	2.61261	94.5951
9624	9.32	0.265	4.775		4.86264	2.65265	96.6599
9824	9.62	0.27	4.874		5.01916	2.7027	98.664
10025	9.7	0.269	4.973		5.0609	2.69269	100.668
10225	9.88	0.275	5.075		5.15482	2.75275	102.733
10425	10.2	0.279	5.175		5.32177	2.79279	104.757
10627	10.3	0.284	5.274		5.37395	2.84284	106.761
10828	10.54	0.289	5.376		5.49917	2.89289	108.826
11028	10.7	0.293	5.475		5.58264	2.93293	110.83
11229	10.82	0.298	5.576		5.64525	2.98298	112.874
11429	11.04	0.302	5.677		5.76004	3.02302	114.919
11629	11.32	0.306	5.777		5.90613	3.06306	116.943
11830	11.54	0.309	5.875		6.02091	3.09309	118.927
12030	11.78	0.314	5.977		6.14613	3.14314	120.992
12231	11.98	0.317	6.076		6.25048	3.17317	122.996
12431	12.12	0.322	6.177		6.32352	3.22322	125.04
12631	12.34	0.324	6.277		6.4383	3.24324	127.065
12832	12.62	0.327	6.376		6.58439	3.27327	129.069
13032	12.7	0.332	6.477		6.62613	3.32332	131.113
13233	12.98	0.335	6.576		6.77222	3.35335	133.117
13433	13.26	0.338	6.682		6.91831	3.38338	135.263
13633	13.4	0.341	6.779		6.99135	3.41341	137.227
13835	13.58	0.34	6.879		7.08526	3.4034	139.251
14036	13.68	0.345	6.98		7.13744	3.45345	141.296
14236	13.98	0.348	7.08		7.29396	3.48348	143.32
14437	14.1	0.353	7.178		7.35657	3.53353	145.304
14637	14.3	0.357	7.278		7.46092	3.57357	147.328
14837	14.4	0.358	7.376		7.51309	3.58358	149.312
15038	14.72	0.363	7.479		7.68005	3.63363	151.397
15238	14.88	0.364	7.58		7.76353	3.64364	153.441
15439	15.08	0.369	7.677		7.86788	3.69369	155.405
15639	15.28	0.372	7.779		7.97223	3.72372	157.47
15839	15.38	0.376	7.879		8.0244	3.76376	159.494
16040	15.72	0.38	7.98		8.20179	3.8038	161.538
16240	15.92	0.378	8.08		8.30614	3.78378	163.563
16441	16.08	0.381	8.18		8.38962	3.81381	165.587
16641	16.28	0.384	8.278		8.49397	3.84384	167.571
16841	16.5	0.387	8.379		8.60875	3.87387	169.615
17043	16.66	0.393	8.482		8.69223	3.93393	171.7
17244	16.9	0.398	8.582		8.81745	3.98398	173.725
17444	17.12	0.402	8.685		8.93223	4.02402	175.81
17645	17.28	0.403	8.782		9.01571	4.03403	177.773
17845	17.42	0.406	8.883		9.08875	4.06406	179.818
18045	17.72	0.408	8.983		9.24528	4.08408	181.842
18246	17.88	0.412	9.005		9.32876	4.12412	182.287
控制模式:围压	波形:斜坡					0
MPa/s	终点:9.0030	MPa				#VALUE!
时间(ms)	垂直力(KN)	垂直变形(mm)	围压(MPa)			#VALUE!
18311	17.96	0.411	9.003		9.3705	4.11411	182.247
控制模式:行程	波形:斜坡					0
mm/s	终点:3.1240	mm				#VALUE!
时间(ms)	垂直力(KN)	垂直变形(mm)	围压(MPa)			#VALUE!
18343	17.92	0.411	8.998		9.34963	4.11411	182.146
18543	17.42	0.406	8.982		9.08875	4.06406	181.822
18743	17.42	0.406	8.982		9.08875	4.06406	181.822
18943	17.68	0.414	8.98		9.22441	4.14414	181.781
19144	17.68	0.414	8.98		9.22441	4.14414	181.781
19346	17.24	0.416	8.978		8.99484	4.16416	181.741
19547	17.76	0.416	8.979		9.26615	4.16416	181.761
19747	17.54	0.419	8.981		9.15136	4.19419	181.802
19947	17.74	0.418	8.979		9.25571	4.18418	181.761
20148	17.58	0.419	8.977		9.17223	4.19419	181.721
20348	17.7	0.42	8.979		9.23484	4.2042	181.761
20549	17.88	0.421	8.979		9.32876	4.21421	181.761
20749	17.8	0.422	8.978		9.28702	4.22422	181.741
20949	18.06	0.424	8.978		9.42267	4.24424	181.741
21150	18.12	0.424	8.981		9.45397	4.24424	181.802
21350	18.12	0.425	8.978		9.45397	4.25425	181.741
21551	18.18	0.426	8.978		9.48528	4.26426	181.741
21751	18.26	0.428	8.979		9.52702	4.28428	181.761
21951	18.26	0.428	8.978		9.52702	4.28428	181.741
22151	18.36	0.429	8.977		9.57919	4.29429	181.721
22352	18.4	0.43	8.977		9.60006	4.3043	181.721
22554	18.4	0.431	8.979		9.60006	4.31431	181.761
22755	18.56	0.432	8.977		9.68354	4.32432	181.721
22955	18.6	0.433	8.979		9.70441	4.33433	181.761
23155	18.64	0.433	8.98		9.72528	4.33433	181.781
23356	18.62	0.436	8.977		9.71485	4.36436	181.721
23556	18.76	0.436	8.979		9.78789	4.36436	181.761
23757	18.36	0.437	8.977		9.57919	4.37437	181.721
23957	18.28	0.439	8.979		9.53745	4.39439	181.761
24157	18.48	0.439	8.979		9.6418	4.39439	181.761
24358	18.96	0.441	8.978		9.89224	4.41441	181.741
24558	18.96	0.441	8.978		9.89224	4.41441	181.741
24759	18.66	0.446	8.979		9.73572	4.46446	181.761
24959	18.04	0.443	8.981		9.41223	4.43443	181.802
25159	18.44	0.444	8.979		9.62093	4.44444	181.761
25360	18.98	0.445	8.979		9.90267	4.45445	181.761
25560	19.28	0.447	8.981		10.0592	4.47447	181.802
25762	19.32	0.447	8.98		10.0801	4.47447	181.781
25963	18.8	0.45	8.978		9.80876	4.5045	181.741
26163	18.76	0.449	8.978		9.78789	4.49449	181.741
26363	18.82	0.45	8.978		9.81919	4.5045	181.741
26564	18.88	0.452	8.98		9.8505	4.52452	181.781
26764	19.42	0.452	8.979		10.1322	4.52452	181.761
26965	19.66	0.454	8.977		10.2575	4.54454	181.721
27165	19.66	0.454	8.977		10.2575	4.54454	181.721
27365	19.66	0.454	8.977		10.2575	4.54454	181.721
27566	19.28	0.455	8.978		10.0592	4.55455	181.741
27766	18.56	0.456	8.979		9.68354	4.56456	181.761
27967	18.56	0.456	8.979		9.68354	4.56456	181.761
28167	18.56	0.456	8.979		9.68354	4.56456	181.761
28367	18.56	0.456	8.979		9.68354	4.56456	181.761
28568	18.94	0.46	8.977		9.8818	4.6046	181.721
28768	18.94	0.46	8.977		9.8818	4.6046	181.721
28970	18.94	0.46	8.977		9.8818	4.6046	181.721
29171	19.52	0.464	8.98		10.1844	4.64464	181.781
29371	19.9	0.465	8.976		10.3827	4.65465	181.7
29571	20.16	0.466	8.982		10.5183	4.66466	181.822
29772	20.06	0.467	8.978		10.4662	4.67467	181.741
29972	20.18	0.469	8.977		10.5288	4.69469	181.721
30173	20.7	0.469	8.98		10.8001	4.69469	181.781
30373	20.4	0.471	8.979		10.6435	4.71471	181.761
30573	20.56	0.471	8.979		10.727	4.71471	181.761
30774	20.84	0.472	8.977		10.8731	4.72472	181.721
30974	20.82	0.474	8.979		10.8627	4.74474	181.761
31175	20.88	0.474	8.979		10.894	4.74474	181.761
31375	20.9	0.475	8.979		10.9044	4.75475	181.761
31575	21	0.477	8.977		10.9566	4.77477	181.721
31776	21.1	0.477	8.979		11.0088	4.77477	181.761
31976	21.06	0.478	8.978		10.9879	4.78478	181.741
32178	20.84	0.48	8.981		10.8731	4.8048	181.802
32379	21.24	0.48	8.979		11.0818	4.8048	181.761
32579	21.3	0.481	8.98		11.1131	4.81481	181.781
32779	21.3	0.482	8.981		11.1131	4.82482	181.802
32980	21.48	0.484	8.979		11.207	4.84484	181.761
33180	21.38	0.484	8.979		11.1549	4.84484	181.761
33381	21.38	0.484	8.979		11.1549	4.84484	181.761
33581	20.76	0.486	8.978		10.8314	4.86486	181.741
33781	20.46	0.486	8.979		10.6749	4.86486	181.761
33982	20.46	0.486	8.979		10.6749	4.86486	181.761
34182	20.3	0.487	8.977		10.5914	4.87487	181.721
34383	20.3	0.487	8.977		10.5914	4.87487	181.721
34583	20.94	0.491	8.977		10.9253	4.91491	181.721
34783	21.56	0.493	8.979		11.2488	4.93493	181.761
34984	21.74	0.493	8.981		11.3427	4.93493	181.802
35184	21.82	0.495	8.98		11.3844	4.95495	181.781
35386	21.78	0.495	8.977		11.3636	4.95495	181.721
35587	22.08	0.496	8.979		11.5201	4.96496	181.761
35787	21.84	0.497	8.976		11.3949	4.97497	181.7
35987	22.24	0.498	8.977		11.6036	4.98498	181.721
36188	22.04	0.499	8.976		11.4992	4.99499	181.7
36388	22.42	0.5	8.982		11.6975	5.00501	181.822
36589	21.12	0.504	8.977		11.0192	5.04505	181.721
36789	21.22	0.502	8.983		11.0714	5.02503	181.842
36989	21.52	0.503	8.975		11.2279	5.03504	181.68
37190	21.22	0.505	8.975		11.0714	5.05506	181.68
37390	22.04	0.505	8.981		11.4992	5.05506	181.802
37591	21.64	0.506	8.977		11.2905	5.06507	181.721
37791	21.64	0.506	8.977		11.2905	5.06507	181.721
37991	22.3	0.509	8.981		11.6349	5.0951	181.802
38192	22.56	0.509	8.975		11.7705	5.0951	181.68
38392	22.78	0.51	8.979		11.8853	5.10511	181.761
38593	22.46	0.512	8.977		11.7183	5.12513	181.721
38793	22.7	0.513	8.979		11.8436	5.13514	181.761
38993	22.4	0.514	8.977		11.687	5.14515	181.721
39193	22.82	0.514	8.977		11.9062	5.14515	181.721
39394	22.32	0.515	8.978		11.6453	5.15516	181.741
39596	22.86	0.516	8.976		11.927	5.16517	181.7
39797	23.42	0.518	8.978		12.2192	5.18519	181.741
39997	23.5	0.518	8.977		12.2609	5.18519	181.721
40197	23.5	0.518	8.977		12.2609	5.18519	181.721
40398	23	0.522	8.976		12.0001	5.22523	181.7
40598	23.1	0.522	8.977		12.0523	5.22523	181.721
40799	23.56	0.521	8.979		12.2923	5.21522	181.761
40999	23.26	0.522	8.98		12.1357	5.22523	181.781
41199	23.48	0.524	8.979		12.2505	5.24525	181.761
41400	23.78	0.526	8.979		12.407	5.26527	181.761
41600	24.04	0.527	8.979		12.5427	5.27528	181.761
41801	24.04	0.527	8.979		12.5427	5.27528	181.761
42001	23.94	0.529	8.977		12.4905	5.2953	181.721
42201	23.84	0.529	8.979		12.4383	5.2953	181.761
42401	24.06	0.53	8.981		12.5531	5.30531	181.802
42602	24.2	0.531	8.976		12.6262	5.31532	181.7
42804	24.18	0.531	8.979		12.6157	5.31532	181.761
43005	24.4	0.534	8.979		12.7305	5.34535	181.761
43205	24.38	0.535	8.978		12.7201	5.35536	181.741
43405	24.22	0.535	8.979		12.6366	5.35536	181.761
43606	24.54	0.537	8.978		12.8036	5.37538	181.741
43806	24.46	0.538	8.977		12.7618	5.38539	181.721
44007	24.58	0.538	8.978		12.8244	5.38539	181.741
44207	24.78	0.54	8.978		12.9288	5.40541	181.741
44407	24.86	0.541	8.981		12.9705	5.41542	181.802
44608	24.88	0.541	8.978		12.981	5.41542	181.741
44808	24.82	0.542	8.98		12.9496	5.42543	181.781
45009	24.66	0.543	8.977		12.8662	5.43544	181.721
45209	25.02	0.543	8.98		13.054	5.43544	181.781
45409	25.14	0.545	8.978		13.1166	5.45546	181.741
45610	25.08	0.547	8.976		13.0853	5.47548	181.7
45810	25.2	0.547	8.978		13.1479	5.47548	181.741
46012	25.2	0.547	8.978		13.1479	5.47548	181.741
46213	25.38	0.549	8.982		13.2418	5.4955	181.822
46413	25.38	0.549	8.982		13.2418	5.4955	181.822
46613	25.52	0.552	8.979		13.3149	5.52553	181.761
46814	25.52	0.552	8.979		13.3149	5.52553	181.761
47014	25.02	0.553	8.976		13.054	5.53554	181.7
47215	25.02	0.553	8.976		13.054	5.53554	181.7
47415	25.06	0.556	8.98		13.0749	5.56557	181.781
47615	25.68	0.556	8.979		13.3983	5.56557	181.761
47816	25.68	0.556	8.979		13.3983	5.56557	181.761
48016	25.68	0.556	8.979		13.3983	5.56557	181.761
48217	25.68	0.556	8.979		13.3983	5.56557	181.761
48417	25.68	0.556	8.979		13.3983	5.56557	181.761
48617	25.88	0.56	8.979		13.5027	5.60561	181.761
48818	25.88	0.56	8.979		13.5027	5.60561	181.761
49018	26.14	0.564	8.979		13.6383	5.64565	181.761
49220	26.08	0.565	8.978		13.607	5.65566	181.741
49421	26.16	0.565	8.976		13.6488	5.65566	181.7
49621	26.04	0.566	8.979		13.5862	5.66567	181.761
49821	25.76	0.566	8.978		13.4401	5.66567	181.741
50022	26.24	0.569	8.978		13.6905	5.6957	181.741
50222	26.5	0.57	8.976		13.8262	5.70571	181.7
50423	26.52	0.57	8.98		13.8366	5.70571	181.781
50623	26.76	0.571	8.981		13.9618	5.71572	181.802
50823	26.36	0.572	8.979		13.7531	5.72573	181.761
51024	26.36	0.572	8.979		13.7531	5.72573	181.761
51224	26.36	0.572	8.979		13.7531	5.72573	181.761
51425	26.52	0.575	8.979		13.8366	5.75576	181.761
51625	26.86	0.576	8.981		14.014	5.76577	181.802
51825	26.92	0.577	8.979		14.0453	5.77578	181.761
52026	26.54	0.578	8.979		13.847	5.78579	181.761
52226	27.14	0.579	8.978		14.1601	5.7958	181.741
52428	27.14	0.579	8.978		14.1601	5.7958	181.741
52629	25.82	0.578	8.981		13.4714	5.78579	181.802
52829	25.82	0.578	8.981		13.4714	5.78579	181.802
53029	25.68	0.582	8.978		13.3983	5.82583	181.741
53230	26.78	0.584	8.976		13.9723	5.84585	181.7
53430	26.92	0.584	8.98		14.0453	5.84585	181.781
53631	27.4	0.586	8.978		14.2957	5.86587	181.741
53831	27.12	0.589	8.98		14.1497	5.8959	181.781
54031	26.52	0.591	8.979		13.8366	5.91592	181.761
54232	26.52	0.591	8.979		13.8366	5.91592	181.761
54432	28.14	0.59	8.979		14.6818	5.90591	181.761
54633	28.34	0.591	8.979		14.7862	5.91592	181.761
54833	28.34	0.591	8.979		14.7862	5.91592	181.761
55033	28.12	0.592	8.98		14.6714	5.92593	181.781
55234	28.12	0.592	8.98		14.6714	5.92593	181.781
55434	26.42	0.595	8.981		13.7844	5.95596	181.802
55636	26.7	0.596	8.98		13.9305	5.96597	181.781
55837	27.96	0.596	8.977		14.5879	5.96597	181.721
56037	28.28	0.6	8.975		14.7549	6.00601	181.68
56237	28.76	0.599	8.979		15.0053	5.996	181.761
56438	28.16	0.599	8.977		14.6923	5.996	181.721
56638	28.12	0.601	8.982		14.6714	6.01602	181.822
56839	28.5	0.602	8.977		14.8697	6.02603	181.721
57039	29.04	0.604	8.98		15.1514	6.04605	181.781
57239	29.18	0.604	8.978		15.2244	6.04605	181.741
57440	28.38	0.606	8.979		14.8071	6.06607	181.761
57640	28.68	0.604	8.979		14.9636	6.04605	181.761
57841	28.68	0.604	8.979		14.9636	6.04605	181.761
58041	28.68	0.604	8.979		14.9636	6.04605	181.761
58241	28.68	0.604	8.979		14.9636	6.04605	181.761
58442	28.68	0.604	8.979		14.9636	6.04605	181.761
58642	28.48	0.611	8.977		14.8592	6.11612	181.721
58843	28.48	0.611	8.977		14.8592	6.11612	181.721
59043	28.48	0.611	8.977		14.8592	6.11612	181.721
59243	29.34	0.614	8.979		15.3079	6.14615	181.761
59443	28.96	0.615	8.979		15.1097	6.15616	181.761
59644	29.46	0.617	8.979		15.3705	6.17618	181.761
59846	29.46	0.617	8.979		15.3705	6.17618	181.761
60047	29.7	0.619	8.978		15.4958	6.1962	181.741
60247	29.16	0.619	8.977		15.214	6.1962	181.721
60447	29.02	0.62	8.979		15.141	6.20621	181.761
60648	29.82	0.622	8.976		15.5584	6.22623	181.7
60848	29.76	0.623	8.977		15.5271	6.23624	181.721
61049	29.88	0.623	8.979		15.5897	6.23624	181.761
61249	29.68	0.624	8.977		15.4853	6.24625	181.721
61449	29.94	0.625	8.977		15.621	6.25626	181.721
61650	30.3	0.626	8.979		15.8088	6.26627	181.761
61850	30.3	0.626	8.979		15.8088	6.26627	181.761
62051	30.32	0.628	8.98		15.8192	6.28629	181.781
62251	30.32	0.628	8.98		15.8192	6.28629	181.781
62451	30.38	0.629	8.978		15.8505	6.2963	181.741
62651	30.02	0.631	8.979		15.6627	6.31632	181.761
62852	30.42	0.633	8.977		15.8714	6.33634	181.721
63054	30.48	0.633	8.981		15.9027	6.33634	181.802
63255	30.42	0.634	8.979		15.8714	6.34635	181.761
63455	30.64	0.635	8.978		15.9862	6.35636	181.741
63655	30.64	0.635	8.978		15.9862	6.35636	181.741
63856	30.6	0.637	8.979		15.9653	6.37638	181.761
64056	30.84	0.638	8.978		16.0905	6.38639	181.741
64257	30.5	0.639	8.979		15.9131	6.3964	181.761
64457	30.98	0.641	8.976		16.1636	6.41642	181.7
64657	30.58	0.641	8.978		15.9549	6.41642	181.741
64858	31.12	0.642	8.979		16.2366	6.42643	181.761
65058	31.1	0.644	8.978		16.2262	6.44645	181.741
65259	31.08	0.644	8.979		16.2158	6.44645	181.761
65459	31.24	0.646	8.978		16.2992	6.46647	181.741
65659	31.28	0.647	8.979		16.3201	6.47648	181.761
65860	31.44	0.647	8.977		16.4036	6.47648	181.721
66060	31.2	0.648	8.977		16.2784	6.48649	181.721
66262	31.32	0.651	8.98		16.341	6.51652	181.781
66463	31.68	0.65	8.98		16.5288	6.50651	181.781
66663	31.74	0.652	8.979		16.5601	6.52653	181.761
66863	31.48	0.653	8.976		16.4245	6.53654	181.7
67064	31.92	0.654	8.979		16.654	6.54655	181.761
67264	31.54	0.655	8.978		16.4558	6.55656	181.741
67465	31.98	0.655	8.979		16.6853	6.55656	181.761
67665	31.98	0.655	8.979		16.6853	6.55656	181.761
67865	31.96	0.657	8.977		16.6749	6.57658	181.721
68066	32.1	0.659	8.981		16.7479	6.5966	181.802
68266	31.94	0.66	8.976		16.6645	6.60661	181.7
68467	32.14	0.66	8.978		16.7688	6.60661	181.741
68667	32.14	0.662	8.977		16.7688	6.62663	181.721
68867	32.28	0.662	8.979		16.8418	6.62663	181.761
69068	32.28	0.664	8.982		16.8418	6.64665	181.822
69268	32.3	0.664	8.981		16.8523	6.64665	181.802
69470	32.44	0.666	8.979		16.9253	6.66667	181.761
69671	32.52	0.666	8.98		16.9671	6.66667	181.781
69871	32.6	0.668	8.979		17.0088	6.68669	181.761
70071	32.66	0.669	8.977		17.0401	6.6967	181.721
70272	32.7	0.669	8.98		17.061	6.6967	181.781
70472	32.6	0.67	8.979		17.0088	6.70671	181.761
70673	32.78	0.671	8.979		17.1027	6.71672	181.761
70873	32.9	0.672	8.979		17.1653	6.72673	181.761
71073	32.92	0.673	8.977		17.1758	6.73674	181.721
71274	32.86	0.674	8.981		17.1445	6.74675	181.802
71474	33.02	0.674	8.976		17.2279	6.74675	181.7
71675	33.08	0.677	8.981		17.2592	6.77678	181.802
71875	33.18	0.678	8.98		17.3114	6.78679	181.781
72075	33.16	0.678	8.977		17.301	6.78679	181.721
72276	33.3	0.679	8.975		17.374	6.7968	181.68
72476	33.24	0.682	8.975		17.3427	6.82683	181.68
72678	33.28	0.682	8.977		17.3636	6.82683	181.721
72879	33.52	0.682	8.977		17.4888	6.82683	181.721
73079	33.48	0.683	8.977		17.4679	6.83684	181.721
73279	33.58	0.684	8.978		17.5201	6.84685	181.741
73480	33.62	0.686	8.98		17.541	6.86687	181.781
73680	33.8	0.687	8.978		17.6349	6.87688	181.741
73881	33.8	0.688	8.981		17.6349	6.88689	181.802
74081	33.78	0.689	8.98		17.6245	6.8969	181.781
74281	33.84	0.689	8.979		17.6558	6.8969	181.761
74482	33.88	0.689	8.979		17.6766	6.8969	181.761
74682	33.96	0.692	8.979		17.7184	6.92693	181.761
74883	33.94	0.692	8.976		17.7079	6.92693	181.7
75083	33.98	0.693	8.978		17.7288	6.93694	181.741
75283	34.1	0.694	8.979		17.7914	6.94695	181.761
75484	34.2	0.695	8.978		17.8436	6.95696	181.741
75684	34.16	0.696	8.977		17.8227	6.96697	181.721
75886	34.34	0.698	8.977		17.9166	6.98699	181.721
76087	34.42	0.698	8.979		17.9584	6.98699	181.761
76287	34.46	0.7	8.983		17.9792	7.00701	181.842
76487	34.46	0.701	8.977		17.9792	7.01702	181.721
76688	34.54	0.701	8.979		18.021	7.01702	181.761
76888	34.74	0.703	8.979		18.1253	7.03704	181.761
77089	34.58	0.704	8.977		18.0419	7.04705	181.721
77289	34.88	0.704	8.98		18.1984	7.04705	181.781
77489	34.9	0.705	8.979		18.2088	7.05706	181.761
77690	34.96	0.706	8.979		18.2401	7.06707	181.761
77890	34.98	0.708	8.979		18.2506	7.08709	181.761
78091	34.98	0.709	8.979		18.2506	7.0971	181.761
78291	35.04	0.709	8.976		18.2819	7.0971	181.7
78491	35.32	0.711	8.98		18.4279	7.11712	181.781
78692	35.34	0.713	8.976		18.4384	7.13714	181.7
78892	35.34	0.713	8.979		18.4384	7.13714	181.761
79093	35.3	0.714	8.979		18.4175	7.14715	181.761
79293	35.62	0.711	8.979		18.5845	7.11712	181.761
79493	35.62	0.711	8.979		18.5845	7.11712	181.761
79693	35.62	0.711	8.979		18.5845	7.11712	181.761
79894	35.68	0.717	8.977		18.6158	7.17718	181.721
80096	35.72	0.719	8.981		18.6366	7.1972	181.802
80297	35.8	0.719	8.981		18.6784	7.1972	181.802
80497	35.76	0.72	8.979		18.6575	7.20721	181.761
80697	35.94	0.721	8.981		18.7514	7.21722	181.802
80898	35.88	0.723	8.977		18.7201	7.23724	181.721
81098	36.1	0.723	8.981		18.8349	7.23724	181.802
81299	36	0.724	8.977		18.7827	7.24725	181.721
81499	36.1	0.726	8.976		18.8349	7.26727	181.7
81699	36.28	0.727	8.977		18.9288	7.27728	181.721
81900	35.8	0.727	8.977		18.6784	7.27728	181.721
82100	36.38	0.729	8.981		18.981	7.2973	181.802
82301	36.34	0.729	8.977		18.9601	7.2973	181.721
82501	36.4	0.73	8.976		18.9914	7.30731	181.7
82701	36.54	0.733	8.978		19.0645	7.33734	181.741
82901	36.62	0.733	8.981		19.1062	7.33734	181.802
83102	37.02	0.732	8.98		19.3149	7.32733	181.781
83304	37.02	0.732	8.98		19.3149	7.32733	181.781
83505	36.84	0.737	8.982		19.221	7.37738	181.822
83705	36.84	0.737	8.982		19.221	7.37738	181.822
83905	36.86	0.738	8.981		19.2314	7.38739	181.802
84106	36.92	0.737	8.977		19.2627	7.37738	181.721
84306	37	0.739	8.981		19.3045	7.3974	181.802
84507	37.08	0.741	8.981		19.3462	7.41742	181.802
84707	37.06	0.741	8.979		19.3358	7.41742	181.761
84907	37.18	0.742	8.98		19.3984	7.42743	181.781
85108	37.18	0.742	8.98		19.3984	7.42743	181.781
85308	37.18	0.742	8.98		19.3984	7.42743	181.781
85509	37.22	0.746	8.978		19.4193	7.46747	181.741
85709	37.4	0.747	8.977		19.5132	7.47748	181.721
85909	37.5	0.747	8.979		19.5653	7.47748	181.761
86110	37.5	0.747	8.979		19.5653	7.47748	181.761
86310	37.3	0.75	8.978		19.461	7.50751	181.741
86512	37.54	0.751	8.979		19.5862	7.51752	181.761
86713	37.66	0.751	8.977		19.6488	7.51752	181.721
86913	37.78	0.752	8.979		19.7114	7.52753	181.761
87113	37.8	0.753	8.979		19.7219	7.53754	181.761
87314	37.9	0.755	8.979		19.774	7.55756	181.761
87514	37.92	0.755	8.979		19.7845	7.55756	181.761
87715	38.08	0.757	8.981		19.868	7.57758	181.802
87915	38.16	0.758	8.981		19.9097	7.58759	181.802
88115	38.2	0.757	8.981		19.9306	7.57758	181.802
88316	38.2	0.757	8.981		19.9306	7.57758	181.802
88516	38.32	0.762	8.979		19.9932	7.62763	181.761
88717	38.32	0.762	8.979		19.9932	7.62763	181.761
88917	38.36	0.764	8.979		20.014	7.64765	181.761
89117	38.44	0.765	8.979		20.0558	7.65766	181.761
89318	38.58	0.764	8.978		20.1288	7.64765	181.741
89518	38.58	0.766	8.981		20.1288	7.66767	181.802
89720	38.66	0.766	8.979		20.1706	7.66767	181.761
89921	38.64	0.768	8.978		20.1601	7.68769	181.741
90121	38.78	0.769	8.979		20.2332	7.6977	181.761
90321	38.84	0.77	8.981		20.2645	7.70771	181.802
90522	38.64	0.771	8.978		20.1601	7.71772	181.741
90722	38.86	0.772	8.981		20.2749	7.72773	181.802
90923	39.08	0.773	8.977		20.3897	7.73774	181.721
91123	38.6	0.773	8.979		20.1393	7.73774	181.761
91323	39.2	0.775	8.977		20.4523	7.75776	181.721
91524	39.3	0.776	8.982		20.5045	7.76777	181.822
91724	39.44	0.775	8.978		20.5775	7.75776	181.741
91925	39.44	0.775	8.978		20.5775	7.75776	181.741
92125	39.24	0.78	8.979		20.4732	7.80781	181.761
92325	39.42	0.779	8.976		20.5671	7.7978	181.7
92526	39.68	0.781	8.98		20.7027	7.81782	181.781
92726	39.4	0.781	8.979		20.5567	7.81782	181.761
92928	39.72	0.783	8.978		20.7236	7.83784	181.741
93129	39.82	0.785	8.978		20.7758	7.85786	181.741
93329	39.76	0.783	8.979		20.7445	7.83784	181.761
93529	39.76	0.783	8.979		20.7445	7.83784	181.761
93730	39.7	0.787	8.979		20.7132	7.87788	181.761
93930	39.92	0.788	8.977		20.828	7.88789	181.721
94131	39.9	0.788	8.979		20.8175	7.88789	181.761
94331	40.06	0.79	8.979		20.901	7.90791	181.761
94531	40.14	0.791	8.979		20.9427	7.91792	181.761
94732	40.14	0.791	8.977		20.9427	7.91792	181.721
94932	40.26	0.792	8.981		21.0054	7.92793	181.802
95133	40.36	0.793	8.979		21.0575	7.93794	181.761
95333	40.24	0.794	8.977		20.9949	7.94795	181.721
95533	40.4	0.796	8.98		21.0784	7.96797	181.781
95734	40.86	0.797	8.98		21.3184	7.97798	181.781
95934	40.86	0.797	8.98		21.3184	7.97798	181.781
96136	40.64	0.797	8.986		21.2036	7.97798	181.903
96337	40.38	0.801	8.979		21.068	8.01802	181.761
96537	40.72	0.801	8.98		21.2454	8.01802	181.781
96737	40.76	0.802	8.979		21.2662	8.02803	181.761
96938	40.88	0.803	8.977		21.3288	8.03804	181.721
97138	41.36	0.804	8.979		21.5793	8.04805	181.761
97339	41.36	0.804	8.979		21.5793	8.04805	181.761
97539	40.72	0.806	8.978		21.2454	8.06807	181.741
97739	41.14	0.807	8.979		21.4645	8.07808	181.761
97940	41.2	0.808	8.979		21.4958	8.08809	181.761
98140	41.24	0.809	8.981		21.5167	8.0981	181.802
98341	41.38	0.81	8.981		21.5897	8.10811	181.802
98541	41.42	0.81	8.98		21.6106	8.10811	181.781
98741	41.42	0.81	8.98		21.6106	8.10811	181.781
98942	41.62	0.813	8.982		21.7149	8.13814	181.822
99142	41.64	0.813	8.982		21.7254	8.13814	181.822
99343	41.56	0.816	8.976		21.6836	8.16817	181.7
99543	41.68	0.816	8.98		21.7462	8.16817	181.781
99743	41.86	0.816	8.981		21.8401	8.16817	181.802
99943	41.7	0.817	8.977		21.7567	8.17818	181.721
100144	41.92	0.819	8.978		21.8714	8.1982	181.741
100346	41.92	0.819	8.978		21.8714	8.1982	181.741
100547	42	0.821	8.978		21.9132	8.21822	181.741
100747	42.02	0.821	8.979		21.9236	8.21822	181.761
100947	41.66	0.826	8.979		21.7358	8.26827	181.761
101148	41.66	0.826	8.979		21.7358	8.26827	181.761
101348	41.68	0.825	8.975		21.7462	8.25826	181.68
101549	42.28	0.826	8.981		22.0593	8.26827	181.802
101749	42.48	0.83	8.977		22.1636	8.30831	181.721
101949	42.24	0.83	8.981		22.0384	8.30831	181.802
102150	42.24	0.83	8.981		22.0384	8.30831	181.802
102350	42.24	0.83	8.981		22.0384	8.30831	181.802
102551	42.24	0.83	8.981		22.0384	8.30831	181.802
102751	42.24	0.83	8.981		22.0384	8.30831	181.802
102951	41.5	0.828	8.975		21.6523	8.28829	181.68
103151	41.5	0.828	8.975		21.6523	8.28829	181.68
103352	41.5	0.828	8.975		21.6523	8.28829	181.68
103554	41.5	0.828	8.975		21.6523	8.28829	181.68
103755	41.5	0.828	8.975		21.6523	8.28829	181.68
103955	41.34	0.842	8.977		21.5688	8.42843	181.721
104155	41.34	0.842	8.977		21.5688	8.42843	181.721
104356	41.34	0.842	8.977		21.5688	8.42843	181.721
104556	41.3	0.837	8.98		21.548	8.37838	181.781
104757	41.3	0.837	8.98		21.548	8.37838	181.781
104957	41.54	0.836	8.978		21.6732	8.36837	181.741
105157	41.04	0.844	8.977		21.4123	8.44845	181.721
105358	41.9	0.848	8.977		21.861	8.48849	181.721
105558	43.3	0.85	8.979		22.5915	8.50851	181.761
105759	43.3	0.85	8.979		22.5915	8.50851	181.761
105959	43.16	0.847	8.979		22.5184	8.47848	181.761
106159	43.26	0.847	8.982		22.5706	8.47848	181.822
106360	43.26	0.847	8.982		22.5706	8.47848	181.822
106560	43.26	0.847	8.982		22.5706	8.47848	181.822
106762	42.98	0.851	8.979		22.4245	8.51852	181.761
106963	43.9	0.853	8.982		22.9045	8.53854	181.822
107163	43.86	0.854	8.981		22.8836	8.54855	181.802
107363	43.94	0.854	8.981		22.9254	8.54855	181.802
107564	43.14	0.858	8.98		22.508	8.58859	181.781
107764	43.14	0.858	8.98		22.508	8.58859	181.781
107965	43.62	0.859	8.977		22.7584	8.5986	181.721
108165	44.2	0.86	8.983		23.061	8.60861	181.842
108365	44.24	0.86	8.976		23.0819	8.60861	181.7
108566	44.3	0.859	8.978		23.1132	8.5986	181.741
108766	44.3	0.859	8.978		23.1132	8.5986	181.741
108967	44.68	0.864	8.979		23.3115	8.64865	181.761
109167	44.68	0.864	8.979		23.3115	8.64865	181.761
109367	44.04	0.865	8.982		22.9775	8.65866	181.822
109568	44.28	0.866	8.979		23.1028	8.66867	181.761
109768	44.28	0.866	8.979		23.1028	8.66867	181.761
109970	43.96	0.867	8.979		22.9358	8.67868	181.761
110171	44.64	0.869	8.978		23.2906	8.6987	181.741
110371	44.98	0.869	8.976		23.468	8.6987	181.7
110571	44.98	0.869	8.976		23.468	8.6987	181.7
110772	44.88	0.872	8.978		23.4158	8.72873	181.741
110972	45.02	0.874	8.976		23.4888	8.74875	181.7
111173	44.98	0.874	8.979		23.468	8.74875	181.761
111373	45.04	0.875	8.981		23.4993	8.75876	181.802
111573	45.18	0.875	8.979		23.5723	8.75876	181.761
111774	45.26	0.878	8.979		23.6141	8.78879	181.761
111974	45.16	0.877	8.978		23.5619	8.77878	181.741
112175	45.38	0.879	8.98		23.6767	8.7988	181.781
112375	45.88	0.882	8.981		23.9375	8.82883	181.802
112575	45.38	0.882	8.978		23.6767	8.82883	181.741
112776	45.32	0.883	8.979		23.6454	8.83884	181.761
112976	45.52	0.882	8.98		23.7497	8.82883	181.781
113178	45.72	0.883	8.977		23.8541	8.83884	181.721
113379	45.62	0.885	8.977		23.8019	8.85886	181.721
113579	45.9	0.886	8.978		23.948	8.86887	181.741
113779	45.94	0.887	8.981		23.9689	8.87888	181.802
113980	45.86	0.888	8.979		23.9271	8.88889	181.761
114180	45.94	0.889	8.981		23.9689	8.8989	181.802
114381	46.06	0.891	8.979		24.0315	8.91892	181.761
114581	46.12	0.89	8.979		24.0628	8.90891	181.761
114781	46.26	0.892	8.975		24.1358	8.92893	181.68
114982	46.36	0.893	8.977		24.188	8.93894	181.721
115182	46.36	0.894	8.977		24.188	8.94895	181.721
115383	46.4	0.895	8.978		24.2089	8.95896	181.741
115583	46.38	0.897	8.981		24.1984	8.97898	181.802
115783	46.64	0.896	8.981		24.3341	8.96897	181.802
115984	46.74	0.898	8.976		24.3862	8.98899	181.7
116184	46.6	0.899	8.978		24.3132	8.999	181.741
116386	46.58	0.9	8.98		24.3028	9.00901	181.781
116587	46.7	0.901	8.978		24.3654	9.01902	181.741
116787	46.76	0.9	8.979		24.3967	9.00901	181.761
116987	46.94	0.903	8.977		24.4906	9.03904	181.721
117188	47.04	0.902	8.979		24.5428	9.02903	181.761
117388	47.04	0.902	8.979		24.5428	9.02903	181.761
117589	47	0.907	8.979		24.5219	9.07908	181.761
117789	47.16	0.907	8.977		24.6054	9.07908	181.721
117989	47.1	0.908	8.979		24.5741	9.08909	181.761
118190	47.18	0.909	8.978		24.6158	9.0991	181.741
118390	47.26	0.911	8.977		24.6576	9.11912	181.721
118591	47.38	0.911	8.977		24.7202	9.11912	181.721
118791	47.4	0.914	8.981		24.7306	9.14915	181.802
118991	47.56	0.914	8.981		24.8141	9.14915	181.802
119192	47.34	0.914	8.977		24.6993	9.14915	181.721
119392	47.38	0.915	8.981		24.7202	9.15916	181.802
119593	47.52	0.916	8.977		24.7932	9.16917	181.721
119793	47.48	0.916	8.98		24.7723	9.16917	181.781
119993	47.74	0.918	8.977		24.908	9.18919	181.721
120193	47.68	0.919	8.976		24.8767	9.1992	181.7
120394	47.88	0.919	8.979		24.981	9.1992	181.761
120596	47.94	0.921	8.977		25.0123	9.21922	181.721
120797	48.02	0.921	8.981		25.0541	9.21922	181.802
120997	48.08	0.922	8.978		25.0854	9.22923	181.741
121197	47.98	0.923	8.98		25.0332	9.23924	181.781
121398	48.18	0.924	8.979		25.1376	9.24925	181.761
121598	48.18	0.924	8.979		25.1376	9.24925	181.761
121799	48.16	0.929	8.98		25.1271	9.2993	181.781
121999	48.04	0.927	8.977		25.0645	9.27928	181.721
122199	48.36	0.929	8.978		25.2315	9.2993	181.741
122400	48.24	0.93	8.979		25.1689	9.30931	181.761
122600	48.24	0.93	8.979		25.1689	9.30931	181.761
122801	48.24	0.93	8.979		25.1689	9.30931	181.761
123001	48.36	0.933	8.979		25.2315	9.33934	181.761
123201	48.26	0.934	8.976		25.1793	9.34935	181.7
123401	48.78	0.935	8.98		25.4506	9.35936	181.781
123602	48.58	0.936	8.98		25.3463	9.36937	181.781
123804	48.94	0.937	8.981		25.5341	9.37938	181.802
124005	48.7	0.938	8.98		25.4089	9.38939	181.781
124205	48.96	0.939	8.979		25.5445	9.3994	181.761
124405	48.98	0.941	8.981		25.5549	9.41942	181.802
124606	49.08	0.941	8.979		25.6071	9.41942	181.761
124806	49.18	0.941	8.98		25.6593	9.41942	181.781
125007	49.22	0.942	8.978		25.6802	9.42943	181.741
125207	49.22	0.942	8.978		25.6802	9.42943	181.741
125407	47.84	0.943	8.979		24.9602	9.43944	181.761
125608	47.48	0.944	8.979		24.7723	9.44945	181.761
125808	47.48	0.944	8.979		24.7723	9.44945	181.761
126009	48.72	0.947	8.979		25.4193	9.47948	181.761
126209	49.7	0.949	8.982		25.9306	9.4995	181.822
126409	49.34	0.951	8.975		25.7428	9.51952	181.68
126610	49.7	0.95	8.978		25.9306	9.50951	181.741
126810	49.76	0.954	8.983		25.9619	9.54955	181.842
127012	49.8	0.952	8.977		25.9828	9.52953	181.721
127213	49.8	0.952	8.977		25.9828	9.52953	181.721
127413	49.96	0.954	8.98		26.0663	9.54955	181.781
127613	49.9	0.956	8.979		26.035	9.56957	181.761
127814	50.08	0.957	8.981		26.1289	9.57958	181.802
128014	50.1	0.958	8.981		26.1393	9.58959	181.802
128215	50.16	0.959	8.981		26.1706	9.5996	181.802
128415	50.16	0.96	8.979		26.1706	9.60961	181.761
128615	50.18	0.961	8.978		26.181	9.61962	181.741
128816	50.18	0.962	8.981		26.181	9.62963	181.802
129016	50.3	0.963	8.978		26.2436	9.63964	181.741
129217	50.58	0.964	8.98		26.3897	9.64965	181.781
129417	50.28	0.966	8.974		26.2332	9.66967	181.66
129617	50.76	0.966	8.977		26.4836	9.66967	181.721
129818	50.7	0.967	8.982		26.4523	9.67968	181.822
130018	50.68	0.968	8.978		26.4419	9.68969	181.741
130220	50.66	0.968	8.976		26.4315	9.68969	181.7
130421	50.86	0.971	8.978		26.5358	9.71972	181.741
130621	50.68	0.971	8.977		26.4419	9.71972	181.721
130821	50.96	0.972	8.977		26.588	9.72973	181.721
131022	51.02	0.972	8.977		26.6193	9.72973	181.721
131222	51	0.975	8.978		26.6089	9.75976	181.741
131423	51.14	0.975	8.979		26.6819	9.75976	181.761
131623	51.2	0.976	8.98		26.7132	9.76977	181.781
131823	51.14	0.978	8.978		26.6819	9.78979	181.741
132024	51.3	0.977	8.98		26.7654	9.77978	181.781
132224	51.44	0.98	8.979		26.8384	9.80981	181.761
132425	51.5	0.98	8.978		26.8697	9.80981	181.741
132625	51.58	0.98	8.98		26.9115	9.80981	181.781
132825	51.42	0.983	8.977		26.828	9.83984	181.721
133026	51.58	0.982	8.981		26.9115	9.82983	181.802
133226	51.64	0.983	8.98		26.9428	9.83984	181.781
133428	51.7	0.985	8.979		26.9741	9.85986	181.761
133629	51.72	0.986	8.978		26.9845	9.86987	181.741
133829	51.78	0.987	8.979		27.0158	9.87988	181.761
134029	51.9	0.988	8.981		27.0784	9.88989	181.802
134230	51.92	0.988	8.981		27.0889	9.88989	181.802
134430	51.9	0.99	8.979		27.0784	9.90991	181.761
134631	52.16	0.991	8.976		27.2141	9.91992	181.7
134831	51.92	0.992	8.98		27.0889	9.92993	181.781
135031	52.06	0.993	8.978		27.1619	9.93994	181.741
135232	52.42	0.994	8.981		27.3497	9.94995	181.802
135432	52.46	0.995	8.979		27.3706	9.95996	181.761
135633	52.46	0.995	8.978		27.3706	9.95996	181.741
135833	52.18	0.997	8.978		27.2245	9.97998	181.741
136033	52.64	0.998	8.979		27.4645	9.98999	181.761
136234	52.64	0.999	8.979		27.4645	10	181.761
136434	52.78	1	8.98		27.5376	10.01	181.781
136636	52.64	1	8.979		27.4645	10.01	181.761
136837	52.8	1.002	8.978		27.548	10.03	181.741
137037	52.86	1.003	8.98		27.5793	10.04	181.781
137237	52.84	1.006	8.978		27.5689	10.0701	181.741
137438	52.78	1.004	8.979		27.5376	10.0501	181.761
137638	52.76	1.007	8.979		27.5271	10.0801	181.761
137839	53.08	1.006	8.979		27.6941	10.0701	181.761
138039	53	1.009	8.982		27.6524	10.1001	181.822
138239	53.24	1.009	8.978		27.7776	10.1001	181.741
138440	53.16	1.01	8.978		27.7358	10.1101	181.741
138640	53.16	1.01	8.978		27.7358	10.1101	181.741
138841	52.4	1.012	8.98		27.3393	10.1301	181.781
139041	52.18	1.013	8.981		27.2245	10.1401	181.802
139241	52.98	1.014	8.981		27.6419	10.1502	181.802
139442	53.04	1.014	8.979		27.6732	10.1502	181.761
139642	53.04	1.014	8.979		27.6732	10.1502	181.761
139843	53.38	1.017	8.978		27.8506	10.1802	181.741
140043	53.66	1.019	8.978		27.9967	10.2002	181.741
140243	54.04	1.018	8.982		28.195	10.1902	181.822
140443	54.04	1.018	8.982		28.195	10.1902	181.822
140644	54.04	1.018	8.982		28.195	10.1902	181.822
140846	53.92	1.022	8.977		28.1324	10.2302	181.721
141047	53.96	1.023	8.977		28.1532	10.2402	181.721
141247	53.98	1.024	8.98		28.1637	10.2503	181.781
141447	54	1.026	8.98		28.1741	10.2703	181.781
141648	54	1.026	8.98		28.1741	10.2703	181.781
141848	54.1	1.027	8.977		28.2263	10.2803	181.721
142049	54.02	1.028	8.978		28.1845	10.2903	181.741
142249	54.02	1.028	8.978		28.1845	10.2903	181.741
142449	54.34	1.03	8.981		28.3515	10.3103	181.802
142650	54.82	1.034	8.983		28.6019	10.3504	181.842
142850	54.82	1.034	8.983		28.6019	10.3504	181.842
143051	53.98	1.033	8.98		28.1637	10.3403	181.781
143251	54.34	1.033	8.977		28.3515	10.3403	181.721
143451	54.56	1.035	8.978		28.4663	10.3604	181.741
143651	54.44	1.036	8.978		28.4037	10.3704	181.741
143852	54.74	1.038	8.977		28.5602	10.3904	181.721
144054	54.9	1.038	8.979		28.6437	10.3904	181.761
144255	54.86	1.04	8.982		28.6228	10.4104	181.822
144455	54.56	1.039	8.975		28.4663	10.4004	181.68
144655	54.52	1.042	8.979		28.4454	10.4304	181.761
144856	54.92	1.042	8.979		28.6541	10.4304	181.761
145056	54.68	1.043	8.978		28.5289	10.4404	181.741
145257	55.14	1.044	8.978		28.7689	10.4505	181.741
145457	55.12	1.045	8.979		28.7584	10.4605	181.761
145657	55.3	1.046	8.98		28.8524	10.4705	181.781
145858	55.4	1.047	8.979		28.9045	10.4805	181.761
146058	55.44	1.048	8.981		28.9254	10.4905	181.802
146259	55.32	1.049	8.981		28.8628	10.5005	181.802
146459	55.58	1.05	8.979		28.9984	10.5105	181.761
146659	55.42	1.05	8.98		28.915	10.5105	181.781
146860	55.42	1.05	8.98		28.915	10.5105	181.781
147060	54	1.052	8.978		28.1741	10.5305	181.741
147262	54	1.052	8.978		28.1741	10.5305	181.741
147463	54	1.052	8.978		28.1741	10.5305	181.741
147663	54.22	1.057	8.978		28.2889	10.5806	181.741
147863	56.3	1.058	8.979		29.3741	10.5906	181.761
148064	55.9	1.058	8.98		29.1654	10.5906	181.781
148264	54.44	1.057	8.979		28.4037	10.5806	181.761
148465	54.44	1.057	8.979		28.4037	10.5806	181.761
148665	55.56	1.064	8.982		28.988	10.6507	181.822
148865	55.98	1.061	8.979		29.2071	10.6206	181.761
149066	55.28	1.06	8.977		28.8419	10.6106	181.721
149266	54.96	1.06	8.978		28.675	10.6106	181.741
149467	54.96	1.06	8.978		28.675	10.6106	181.741
149667	54.42	1.068	8.977		28.3932	10.6907	181.721
149867	54.46	1.067	8.976		28.4141	10.6807	181.7
150068	56.14	1.068	8.979		29.2906	10.6907	181.761
150268	56.34	1.069	8.979		29.395	10.7007	181.761
150470	56.34	1.069	8.979		29.395	10.7007	181.761
150671	56.34	1.069	8.979		29.395	10.7007	181.761
150871	55.54	1.072	8.977		28.9776	10.7307	181.721
151071	55.8	1.072	8.977		29.1132	10.7307	181.721
151272	55.8	1.072	8.977		29.1132	10.7307	181.721
151472	55.68	1.075	8.979		29.0506	10.7608	181.761
151673	55.94	1.078	8.979		29.1863	10.7908	181.761
151873	56.42	1.078	8.979		29.4367	10.7908	181.761
152073	56.42	1.078	8.979		29.4367	10.7908	181.761
152274	55.92	1.081	8.976		29.1758	10.8208	181.7
152474	56.7	1.081	8.98		29.5828	10.8208	181.781
152675	56.7	1.081	8.98		29.5828	10.8208	181.781
152875	56.7	1.081	8.98		29.5828	10.8208	181.781
153075	55.82	1.081	8.978		29.1237	10.8208	181.741
153276	55.72	1.083	8.976		29.0715	10.8408	181.7
153476	55.72	1.083	8.976		29.0715	10.8408	181.7
153678	54.64	1.082	8.977		28.508	10.8308	181.721
153879	54.52	1.082	8.973		28.4454	10.8308	181.64
154079	54.52	1.082	8.973		28.4454	10.8308	181.64
154279	54.98	1.089	8.976		28.6854	10.9009	181.7
154480	54.98	1.089	8.976		28.6854	10.9009	181.7
154680	54.98	1.089	8.976		28.6854	10.9009	181.7
154881	54.98	1.089	8.976		28.6854	10.9009	181.7
155081	54.88	1.092	8.977		28.6332	10.9309	181.721
155281	54.88	1.092	8.977		28.6332	10.9309	181.721
155482	56.38	1.094	8.979		29.4158	10.951	181.761
155682	57.58	1.096	8.975		30.0419	10.971	181.68
155883	57.58	1.096	8.975		30.0419	10.971	181.68
156083	57.58	1.096	8.975		30.0419	10.971	181.68
156283	57.58	1.096	8.975		30.0419	10.971	181.68
156484	57.92	1.101	8.977		30.2193	11.021	181.721
156684	58.26	1.101	8.979		30.3967	11.021	181.761
156886	58.12	1.102	8.975		30.3237	11.031	181.68
157087	58.36	1.103	8.978		30.4489	11.041	181.741
157287	58.4	1.103	8.979		30.4698	11.041	181.761
157487	58.56	1.105	8.981		30.5532	11.0611	181.802
157688	58.68	1.106	8.978		30.6159	11.0711	181.741
157888	56.78	1.11	8.974		29.6245	11.1111	181.66
158089	56.56	1.107	8.979		29.5098	11.0811	181.761
158289	56.56	1.107	8.979		29.5098	11.0811	181.761
158489	56.22	1.111	8.975		29.3324	11.1211	181.68
158690	58.62	1.115	8.979		30.5845	11.1612	181.761
158890	58.68	1.111	8.98		30.6159	11.1211	181.781
159091	58.68	1.111	8.98		30.6159	11.1211	181.781
159291	59.04	1.116	8.979		30.8037	11.1712	181.761
159491	57.48	1.111	8.978		29.9898	11.1211	181.741
159692	57.24	1.115	8.974		29.8645	11.1612	181.66
159892	58.02	1.117	8.978		30.2715	11.1812	181.741
160093	59.16	1.119	8.978		30.8663	11.2012	181.741
160293	59.02	1.119	8.978		30.7932	11.2012	181.741
160493	57.64	1.12	8.978		30.0732	11.2112	181.741
160693	57.32	1.121	8.978		29.9063	11.2212	181.741
160894	58.12	1.123	8.98		30.3237	11.2412	181.781
161096	59.38	1.123	8.978		30.9811	11.2412	181.741
161297	59.02	1.124	8.978		30.7932	11.2513	181.741
161497	59.58	1.125	8.981		31.0854	11.2613	181.802
161697	59.08	1.127	8.979		30.8245	11.2813	181.761
161898	59.32	1.126	8.98		30.9498	11.2713	181.781
162098	59.32	1.126	8.98		30.9498	11.2713	181.781
162299	59.32	1.126	8.98		30.9498	11.2713	181.781
162499	59.16	1.13	8.978		30.8663	11.3113	181.741
162699	59.58	1.13	8.981		31.0854	11.3113	181.802
162900	59.88	1.134	8.975		31.2419	11.3514	181.68
163100	59.66	1.136	8.98		31.1272	11.3714	181.781
163301	59.66	1.136	8.98		31.1272	11.3714	181.781
163501	59.62	1.135	8.977		31.1063	11.3614	181.721
163701	59.62	1.135	8.977		31.1063	11.3614	181.721
163901	59.62	1.135	8.977		31.1063	11.3614	181.721
164102	59.34	1.134	8.98		30.9602	11.3514	181.781
164304	59.34	1.134	8.98		30.9602	11.3514	181.781
164505	57.88	1.139	8.979		30.1985	11.4014	181.761
164705	57.7	1.141	8.98		30.1045	11.4214	181.781
164905	59.56	1.142	8.98		31.075	11.4314	181.781
165106	59.56	1.142	8.98		31.075	11.4314	181.781
165306	59.68	1.145	8.978		31.1376	11.4615	181.741
165507	59.8	1.146	8.977		31.2002	11.4715	181.721
165707	60.58	1.147	8.979		31.6072	11.4815	181.761
165907	60.82	1.147	8.981		31.7324	11.4815	181.802
166108	60.96	1.148	8.978		31.8054	11.4915	181.741
166308	60.66	1.15	8.978		31.6489	11.5115	181.741
166509	61.08	1.15	8.977		31.868	11.5115	181.721
166709	61.24	1.152	8.98		31.9515	11.5315	181.781
166909	61.06	1.152	8.981		31.8576	11.5315	181.802
167110	61.28	1.152	8.978		31.9724	11.5315	181.741
167310	61.28	1.152	8.978		31.9724	11.5315	181.741
167512	61.58	1.156	8.978		32.1289	11.5716	181.741
167713	61.46	1.156	8.979		32.0663	11.5716	181.761
167913	61.16	1.158	8.979		31.9098	11.5916	181.761
168113	61.52	1.158	8.978		32.0976	11.5916	181.741
168314	61.86	1.158	8.982		32.275	11.5916	181.822
168514	61.7	1.16	8.981		32.1915	11.6116	181.802
168715	61.78	1.161	8.977		32.2333	11.6216	181.721
168915	61.42	1.163	8.977		32.0454	11.6416	181.721
169115	61.42	1.163	8.977		32.0454	11.6416	181.721
169316	61.42	1.163	8.977		32.0454	11.6416	181.721
169516	59.56	1.164	8.976		31.075	11.6517	181.7
169717	59.24	1.165	8.98		30.908	11.6617	181.781
169917	59.24	1.165	8.98		30.908	11.6617	181.781
170117	59.6	1.167	8.98		31.0959	11.6817	181.781
170318	61	1.17	8.977		31.8263	11.7117	181.721
170518	62.08	1.17	8.978		32.3898	11.7117	181.741
170720	62.14	1.172	8.979		32.4211	11.7317	181.761
170921	62.24	1.172	8.979		32.4733	11.7317	181.761
171121	62.4	1.173	8.981		32.5567	11.7417	181.802
171321	62.44	1.174	8.977		32.5776	11.7518	181.721
171522	62.56	1.174	8.978		32.6402	11.7518	181.741
171722	61.92	1.176	8.981		32.3063	11.7718	181.802
171923	62.36	1.177	8.977		32.5359	11.7818	181.721
172123	62.66	1.178	8.979		32.6924	11.7918	181.761
172323	62.92	1.178	8.975		32.828	11.7918	181.68
172524	62.92	1.178	8.975		32.828	11.7918	181.68
172724	62.92	1.178	8.975		32.828	11.7918	181.68
172925	61.98	1.185	8.974		32.3376	11.8619	181.66
173125	61.46	1.183	8.979		32.0663	11.8418	181.761
173325	61.46	1.183	8.979		32.0663	11.8418	181.761
173526	62.08	1.185	8.98		32.3898	11.8619	181.781
173726	62.94	1.186	8.976		32.8385	11.8719	181.7
173928	62.94	1.186	8.976		32.8385	11.8719	181.7
174129	60.5	1.184	8.973		31.5654	11.8519	181.64
174329	60.44	1.188	8.98		31.5341	11.8919	181.781
174529	62	1.191	8.977		32.348	11.9219	181.721
174730	62.9	1.191	8.979		32.8176	11.9219	181.761
174930	63.38	1.193	8.978		33.068	11.9419	181.741
175131	63.34	1.193	8.979		33.0472	11.9419	181.761
175331	63.34	1.193	8.979		33.0472	11.9419	181.761
175531	63.62	1.195	8.981		33.1933	11.962	181.802
175732	63.64	1.196	8.979		33.2037	11.972	181.761
175932	63.64	1.196	8.979		33.2037	11.972	181.761
176133	61.8	1.198	8.98		32.2437	11.992	181.781
176333	61.86	1.199	8.979		32.275	12.002	181.761
176533	62.94	1.2	8.978		32.8385	12.012	181.741
176734	63.24	1.201	8.977		32.995	12.022	181.721
176934	63.5	1.201	8.98		33.1306	12.022	181.781
177136	63.72	1.203	8.977		33.2454	12.042	181.721
177337	63.78	1.203	8.981		33.2767	12.042	181.802
177537	63.44	1.206	8.981		33.0993	12.0721	181.802
177737	63.44	1.206	8.981		33.0993	12.0721	181.802
177938	63.44	1.206	8.981		33.0993	12.0721	181.802
178138	63.42	1.207	8.983		33.0889	12.0821	181.842
178339	63.8	1.209	8.977		33.2872	12.1021	181.721
178539	63.66	1.211	8.979		33.2141	12.1221	181.761
178739	63.9	1.211	8.978		33.3393	12.1221	181.741
178940	64.18	1.214	8.976		33.4854	12.1522	181.7
179140	63.9	1.212	8.981		33.3393	12.1321	181.802
179341	63.64	1.214	8.979		33.2037	12.1522	181.761
179541	63.64	1.214	8.979		33.2037	12.1522	181.761
179741	64.28	1.216	8.976		33.5376	12.1722	181.7
179942	64.2	1.216	8.978		33.4959	12.1722	181.741
180142	64.04	1.218	8.979		33.4124	12.1922	181.761
180343	64.04	1.218	8.979		33.4124	12.1922	181.761
180543	64.04	1.218	8.979		33.4124	12.1922	181.761
180743	64.64	1.221	8.981		33.7254	12.2222	181.802
180943	64.88	1.222	8.977		33.8507	12.2322	181.721
181144	64.38	1.224	8.976		33.5898	12.2523	181.7
181346	64.38	1.224	8.976		33.5898	12.2523	181.7
181547	64.38	1.224	8.976		33.5898	12.2523	181.7
181747	64.54	1.226	8.979		33.6733	12.2723	181.761
181947	65.5	1.227	8.976		34.1741	12.2823	181.7
182148	65.42	1.227	8.98		34.1324	12.2823	181.781
182348	65.1	1.229	8.979		33.9654	12.3023	181.761
182549	65.64	1.23	8.981		34.2472	12.3123	181.802
182749	65.52	1.231	8.979		34.1846	12.3223	181.761
182949	65.52	1.231	8.979		34.1846	12.3223	181.761
183150	65.52	1.231	8.979		34.1846	12.3223	181.761
183350	64.74	1.237	8.98		33.7776	12.3824	181.781
183551	64.44	1.231	8.977		33.6211	12.3223	181.721
183751	66.34	1.236	8.982		34.6124	12.3724	181.822
183951	66.3	1.238	8.981		34.5915	12.3924	181.802
184151	66.3	1.238	8.981		34.5915	12.3924	181.802
184352	65.82	1.242	8.979		34.3411	12.4324	181.761
184554	65.82	1.242	8.979		34.3411	12.4324	181.761
184755	65.32	1.241	8.981		34.0802	12.4224	181.802
184955	65.18	1.242	8.979		34.0072	12.4324	181.761
185155	65.18	1.242	8.979		34.0072	12.4324	181.761
185356	65.56	1.244	8.979		34.2054	12.4525	181.761
185556	66.12	1.245	8.982		34.4976	12.4625	181.822
185757	65.78	1.251	8.983		34.3202	12.5225	181.842
185957	64.64	1.246	8.981		33.7254	12.4725	181.802
186157	65.08	1.249	8.981		33.955	12.5025	181.802
186358	65.86	1.25	8.979		34.362	12.5125	181.761
186558	65.86	1.25	8.979		34.362	12.5125	181.761
186759	65.86	1.25	8.979		34.362	12.5125	181.761
186959	65.86	1.25	8.979		34.362	12.5125	181.761
187159	65.86	1.25	8.979		34.362	12.5125	181.761
187360	65.48	1.255	8.978		34.1637	12.5626	181.741
187560	66.16	1.254	8.978		34.5185	12.5526	181.741
187762	66.54	1.256	8.979		34.7167	12.5726	181.761
187963	66.58	1.256	8.98		34.7376	12.5726	181.781
188163	66.58	1.256	8.98		34.7376	12.5726	181.781
188363	66.98	1.259	8.977		34.9463	12.6026	181.721
188564	66.98	1.259	8.977		34.9463	12.6026	181.721
188764	66.98	1.259	8.977		34.9463	12.6026	181.721
188965	66.98	1.259	8.977		34.9463	12.6026	181.721
189165	66.98	1.259	8.977		34.9463	12.6026	181.721
189365	67	1.259	8.981		34.9567	12.6026	181.802
189566	67	1.259	8.981		34.9567	12.6026	181.802
189766	67	1.259	8.981		34.9567	12.6026	181.802
189967	67	1.259	8.981		34.9567	12.6026	181.802
190167	64.66	1.271	8.975		33.7359	12.7227	181.68
190367	65.06	1.273	8.981		33.9446	12.7427	181.802
190568	66.96	1.268	8.976		34.9359	12.6927	181.7
190768	68.34	1.273	8.98		35.6559	12.7427	181.781
190970	68.44	1.272	8.98		35.7081	12.7327	181.781
191171	67.44	1.272	8.978		35.1863	12.7327	181.741
191371	67.44	1.272	8.978		35.1863	12.7327	181.741
191571	67.44	1.272	8.978		35.1863	12.7327	181.741
191772	67.44	1.272	8.978		35.1863	12.7327	181.741
191972	67.44	1.272	8.978		35.1863	12.7327	181.741
192173	67.44	1.272	8.978		35.1863	12.7327	181.741
192373	68.14	1.28	8.979		35.5515	12.8128	181.761
192573	67.68	1.277	8.979		35.3115	12.7828	181.761
192774	67.68	1.277	8.979		35.3115	12.7828	181.761
192974	68.9	1.287	8.981		35.9481	12.8829	181.802
193175	68.42	1.284	8.984		35.6976	12.8529	181.862
193375	65.34	1.285	8.975		34.0907	12.8629	181.68
193575	65.64	1.286	8.977		34.2472	12.8729	181.721
193776	65.64	1.286	8.977		34.2472	12.8729	181.721
193976	66.46	1.286	8.98		34.675	12.8729	181.781
194178	66.32	1.286	8.978		34.602	12.8729	181.741
194379	67.7	1.29	8.977		35.322	12.9129	181.721
194579	67.7	1.29	8.977		35.322	12.9129	181.721
194779	67.26	1.292	8.979		35.0924	12.9329	181.761
194980	67.54	1.293	8.975		35.2385	12.9429	181.68
195180	68.6	1.294	8.978		35.7915	12.953	181.741
195381	68.4	1.295	8.978		35.6872	12.963	181.741
195581	68.4	1.295	8.975		35.6872	12.963	181.68
195781	68.9	1.297	8.98		35.9481	12.983	181.781
195982	69.1	1.297	8.978		36.0524	12.983	181.741
196182	68.72	1.298	8.977		35.8541	12.993	181.721
196383	68.5	1.299	8.974		35.7394	13.003	181.66
196583	68.5	1.299	8.974		35.7394	13.003	181.66
196783	68.5	1.3	8.979		35.7394	13.013	181.761
196984	69.28	1.302	8.975		36.1463	13.033	181.68
197184	69.4	1.304	8.976		36.2089	13.0531	181.7
197386	69.6	1.304	8.979		36.3133	13.0531	181.761
197587	69.26	1.304	8.976		36.1359	13.0531	181.7
197787	68.96	1.307	8.978		35.9794	13.0831	181.741
197987	69.68	1.307	8.979		36.355	13.0831	181.761
198188	69.68	1.308	8.979		36.355	13.0931	181.761
198388	69.78	1.31	8.982		36.4072	13.1131	181.822
198589	69.28	1.31	8.979		36.1463	13.1131	181.761
198789	69.88	1.312	8.98		36.4594	13.1331	181.781
198989	69.56	1.312	8.978		36.2924	13.1331	181.741
199190	69.56	1.312	8.978		36.2924	13.1331	181.741
199390	69.56	1.312	8.978		36.2924	13.1331	181.741
199591	69.56	1.312	8.978		36.2924	13.1331	181.741
199791	69.9	1.316	8.978		36.4698	13.1732	181.741
199991	69.5	1.318	8.975		36.2611	13.1932	181.68
200192	70.26	1.318	8.98		36.6576	13.1932	181.781
200392	70.26	1.318	8.98		36.6576	13.1932	181.781
200593	70.26	1.318	8.98		36.6576	13.1932	181.781
200793	70.26	1.318	8.98		36.6576	13.1932	181.781
200993	69.42	1.322	8.977		36.2194	13.2332	181.721
201193	69.78	1.322	8.98		36.4072	13.2332	181.781
201394	70.3	1.325	8.976		36.6785	13.2633	181.7
201596	70.66	1.326	8.978		36.8663	13.2733	181.741
201797	70.66	1.326	8.978		36.8663	13.2733	181.741
201997	70.3	1.327	8.98		36.6785	13.2833	181.781
202197	70.34	1.327	8.978		36.6994	13.2833	181.741
202398	70.82	1.33	8.977		36.9498	13.3133	181.721
202598	70.82	1.33	8.977		36.9498	13.3133	181.721
202799	70.88	1.331	8.979		36.9811	13.3233	181.761
202999	70.86	1.332	8.979		36.9707	13.3333	181.761
203199	70.8	1.334	8.981		36.9394	13.3534	181.802
203400	71	1.334	8.977		37.0437	13.3534	181.721
203600	71.16	1.336	8.98		37.1272	13.3734	181.781
203801	70.44	1.335	8.981		36.7515	13.3634	181.802
204001	70.74	1.336	8.979		36.9081	13.3734	181.761
204201	71.16	1.339	8.981		37.1272	13.4034	181.802
204401	71.08	1.339	8.979		37.0855	13.4034	181.761
204602	70.12	1.346	8.977		36.5846	13.4735	181.721
204804	69.86	1.343	8.977		36.4489	13.4434	181.721
205005	69.86	1.343	8.977		36.4489	13.4434	181.721
205205	71.2	1.343	8.978		37.1481	13.4434	181.741
205405	70.82	1.344	8.977		36.9498	13.4535	181.721
205606	71.34	1.345	8.979		37.2211	13.4635	181.761
205806	71.34	1.346	8.978		37.2211	13.4735	181.741
206007	71.66	1.347	8.978		37.3881	13.4835	181.741
206207	71.5	1.347	8.976		37.3046	13.4835	181.7
206407	71.68	1.349	8.978		37.3985	13.5035	181.741
206608	71.68	1.349	8.978		37.3985	13.5035	181.741
206808	71.8	1.351	8.979		37.4611	13.5235	181.761
207009	71.94	1.352	8.977		37.5342	13.5335	181.721
207209	71.76	1.353	8.979		37.4402	13.5435	181.761
207409	72.06	1.354	8.979		37.5968	13.5536	181.761
207610	72	1.355	8.979		37.5655	13.5636	181.761
207810	72.18	1.357	8.98		37.6594	13.5836	181.781
208012	72.08	1.357	8.981		37.6072	13.5836	181.802
208213	72.28	1.358	8.977		37.7115	13.5936	181.721
208413	71.94	1.359	8.981		37.5342	13.6036	181.802
208613	72.34	1.36	8.98		37.7429	13.6136	181.781
208814	72.34	1.362	8.979		37.7429	13.6336	181.761
209014	72.2	1.362	8.978		37.6698	13.6336	181.741
209215	72.5	1.363	8.977		37.8263	13.6436	181.721
209415	72.34	1.365	8.978		37.7429	13.6637	181.741
209615	72.58	1.366	8.981		37.8681	13.6737	181.802
209816	72.74	1.365	8.981		37.9515	13.6637	181.802
210016	72.74	1.365	8.981		37.9515	13.6637	181.802
210217	72.5	1.368	8.977		37.8263	13.6937	181.721
210417	72.82	1.368	8.977		37.9933	13.6937	181.721
210617	72.74	1.37	8.978		37.9515	13.7137	181.741
210818	72.96	1.372	8.977		38.0663	13.7337	181.721
211018	72.8	1.372	8.978		37.9829	13.7337	181.741
211220	73.02	1.374	8.979		38.0976	13.7538	181.761
211421	72.54	1.375	8.978		37.8472	13.7638	181.741
211621	73.1	1.375	8.979		38.1394	13.7638	181.761
211821	73.1	1.376	8.979		38.1394	13.7738	181.761
212022	72.94	1.378	8.981		38.0559	13.7938	181.802
212222	73.14	1.378	8.979		38.1602	13.7938	181.761
212423	73.22	1.38	8.977		38.202	13.8138	181.721
212623	73.22	1.379	8.982		38.202	13.8038	181.822
212823	73.32	1.382	8.979		38.2542	13.8338	181.761
213024	73.14	1.383	8.98		38.1602	13.8438	181.781
213224	73.48	1.383	8.979		38.3376	13.8438	181.761
213425	73.26	1.385	8.979		38.2229	13.8639	181.761
213625	73.68	1.384	8.978		38.442	13.8539	181.741
213825	73.14	1.386	8.978		38.1602	13.8739	181.741
214026	73.54	1.388	8.976		38.3689	13.8939	181.7
214226	73.5	1.389	8.977		38.3481	13.9039	181.721
214428	73.7	1.389	8.979		38.4524	13.9039	181.761
214629	74.1	1.392	8.974		38.6611	13.9339	181.66
214829	74.1	1.392	8.974		38.6611	13.9339	181.66
215029	73.82	1.394	8.978		38.515	13.954	181.741
215230	73.8	1.393	8.979		38.5046	13.9439	181.761
215430	73.8	1.393	8.979		38.5046	13.9439	181.761
215631	73.8	1.393	8.979		38.5046	13.9439	181.761
215831	73.8	1.393	8.979		38.5046	13.9439	181.761
216031	72.98	1.399	8.979		38.0768	14.004	181.761
216232	72.98	1.399	8.979		38.0768	14.004	181.761
216432	72.84	1.4	8.978		38.0037	14.014	181.741
216633	74.3	1.404	8.979		38.7655	14.0541	181.761
216833	74.02	1.402	8.982		38.6194	14.034	181.822
217033	73.68	1.402	8.98		38.442	14.034	181.781
217234	74.42	1.403	8.98		38.8281	14.044	181.781
217434	74.5	1.404	8.977		38.8698	14.0541	181.721
217636	74.6	1.405	8.979		38.922	14.0641	181.761
217837	74.54	1.407	8.98		38.8907	14.0841	181.781
218037	74.46	1.407	8.979		38.8489	14.0841	181.761
218237	74.54	1.408	8.976		38.8907	14.0941	181.7
218438	74.84	1.411	8.98		39.0472	14.1241	181.781
218638	74.64	1.411	8.981		38.9429	14.1241	181.802
218839	75.14	1.41	8.978		39.2037	14.1141	181.741
219039	74.66	1.412	8.979		38.9533	14.1341	181.761
219239	74.82	1.413	8.977		39.0368	14.1441	181.721
219440	75	1.415	8.981		39.1307	14.1642	181.802
219640	74.9	1.416	8.98		39.0785	14.1742	181.781
219841	74.94	1.416	8.979		39.0994	14.1742	181.761
220041	75.12	1.419	8.98		39.1933	14.2042	181.781
220241	75.26	1.419	8.982		39.2663	14.2042	181.822
220442	75.26	1.419	8.982		39.2663	14.2042	181.822
220642	75.26	1.42	8.98		39.2663	14.2142	181.781
220843	75	1.422	8.978		39.1307	14.2342	181.741
221043	75.34	1.423	8.982		39.3081	14.2442	181.822
221243	75.38	1.424	8.979		39.329	14.2543	181.761
221443	75.48	1.424	8.978		39.3811	14.2543	181.741
221644	75.58	1.426	8.977		39.4333	14.2743	181.721
221846	75.64	1.426	8.98		39.4646	14.2743	181.781
222047	75.48	1.427	8.978		39.3811	14.2843	181.741
222247	75.52	1.428	8.975		39.402	14.2943	181.68
222447	75.68	1.429	8.977		39.4855	14.3043	181.721
222648	75.74	1.43	8.978		39.5168	14.3143	181.741
222848	75.8	1.432	8.977		39.5481	14.3343	181.721
223049	75.88	1.433	8.98		39.5898	14.3443	181.781
223249	75.94	1.433	8.979		39.6211	14.3443	181.761
223449	75.88	1.435	8.979		39.5898	14.3644	181.761
223650	76.14	1.435	8.976		39.7255	14.3644	181.7
223850	76.02	1.436	8.98		39.6629	14.3744	181.781
224051	76.06	1.437	8.979		39.6837	14.3844	181.761
224251	76.08	1.438	8.981		39.6942	14.3944	181.802
224451	76.16	1.439	8.978		39.7359	14.4044	181.741
224651	76.1	1.441	8.978		39.7046	14.4244	181.741
224852	76.12	1.442	8.98		39.715	14.4344	181.781
225054	76.24	1.442	8.979		39.7776	14.4344	181.761
225255	76.16	1.444	8.976		39.7359	14.4545	181.7
225455	76.48	1.445	8.981		39.9029	14.4645	181.802
225655	76.12	1.446	8.979		39.715	14.4745	181.761
225856	76.64	1.447	8.979		39.9863	14.4845	181.761
226056	76.64	1.447	8.978		39.9863	14.4845	181.741
226257	76.5	1.448	8.98		39.9133	14.4945	181.781
226457	76.74	1.451	8.981		40.0385	14.5245	181.802
226657	76.68	1.45	8.98		40.0072	14.5145	181.781
226858	76.72	1.452	8.981		40.0281	14.5345	181.802
227058	76.42	1.452	8.979		39.8716	14.5345	181.761
227259	77.02	1.454	8.981		40.1846	14.5546	181.802
227459	76.54	1.454	8.979		39.9342	14.5546	181.761
227659	76.54	1.454	8.979		39.9342	14.5546	181.761
227860	76.5	1.456	8.977		39.9133	14.5746	181.721
228060	77.06	1.458	8.978		40.2055	14.5946	181.741
228262	76.56	1.459	8.978		39.9446	14.6046	181.741
228463	77.16	1.459	8.977		40.2577	14.6046	181.721
228663	77.26	1.461	8.978		40.3098	14.6246	181.741
228863	77.2	1.463	8.981		40.2785	14.6446	181.802
229064	77.14	1.462	8.979		40.2472	14.6346	181.761
229264	77.34	1.463	8.978		40.3516	14.6446	181.741
229465	77.32	1.465	8.979		40.3411	14.6647	181.761
229665	77.14	1.464	8.98		40.2472	14.6547	181.781
229865	77.34	1.467	8.977		40.3516	14.6847	181.721
230066	77.44	1.466	8.976		40.4037	14.6747	181.7
230266	77.44	1.468	8.979		40.4037	14.6947	181.761
230467	77.58	1.47	8.978		40.4768	14.7147	181.741
230667	77.58	1.471	8.978		40.4768	14.7247	181.741
230867	77.44	1.471	8.977		40.4037	14.7247	181.721
231068	77.66	1.473	8.979		40.5185	14.7447	181.761
231268	77.6	1.474	8.977		40.4872	14.7548	181.721
231470	77.62	1.474	8.979		40.4977	14.7548	181.761
231671	77.6	1.476	8.981		40.4872	14.7748	181.802
231871	77.9	1.477	8.978		40.6437	14.7848	181.741
232071	77.76	1.477	8.98		40.5707	14.7848	181.781
232272	77.88	1.478	8.981		40.6333	14.7948	181.802
232472	78.06	1.479	8.98		40.7272	14.8048	181.781
232673	78.08	1.481	8.976		40.7377	14.8248	181.7
232873	78.08	1.481	8.976		40.7377	14.8248	181.7
233073	78.3	1.483	8.982		40.8524	14.8448	181.822
233274	78.1	1.483	8.982		40.7481	14.8448	181.822
233474	78.18	1.485	8.979		40.7898	14.8649	181.761
233675	78.24	1.485	8.977		40.8211	14.8649	181.721
233875	78.46	1.487	8.979		40.9359	14.8849	181.761
234075	78.3	1.486	8.977		40.8524	14.8749	181.721
234276	78.42	1.488	8.978		40.915	14.8949	181.741
234476	78.56	1.489	8.981		40.9881	14.9049	181.802
234678	78.44	1.489	8.979		40.9255	14.9049	181.761
234879	78.68	1.492	8.979		41.0507	14.9349	181.761
235079	78.32	1.492	8.981		40.8629	14.9349	181.802
235279	78.56	1.494	8.979		40.9881	14.955	181.761
235480	78.54	1.494	8.981		40.9777	14.955	181.802
235680	78.74	1.496	8.979		41.082	14.975	181.761
235881	78.72	1.497	8.977		41.0716	14.985	181.721
236081	78.76	1.497	8.978		41.0924	14.985	181.741
236281	78.92	1.495	8.981		41.1759	14.965	181.802
236482	78.92	1.495	8.981		41.1759	14.965	181.802
236682	78.98	1.5	8.975		41.2072	15.015	181.68
236883	78.94	1.502	8.977		41.1864	15.035	181.721
237083	78.98	1.503	8.976		41.2072	15.045	181.7
237283	79.12	1.503	8.979		41.2803	15.045	181.761
237484	78.94	1.505	8.978		41.1864	15.0651	181.741
237684	79.22	1.505	8.98		41.3324	15.0651	181.781
237886	79.14	1.507	8.978		41.2907	15.0851	181.741
238087	79.18	1.508	8.98		41.3116	15.0951	181.781
238287	79.26	1.509	8.978		41.3533	15.1051	181.741
238487	79.26	1.509	8.978		41.3533	15.1051	181.741
238688	79.38	1.51	8.979		41.4159	15.1151	181.761
238888	79.46	1.511	8.978		41.4577	15.1251	181.741
239089	79.46	1.511	8.978		41.4577	15.1251	181.741
239289	79.76	1.515	8.98		41.6142	15.1652	181.781
239489	79.76	1.515	8.98		41.6142	15.1652	181.781
239690	79.74	1.515	8.978		41.6037	15.1652	181.741
239890	79.72	1.517	8.98		41.5933	15.1852	181.781
240091	79.72	1.518	8.979		41.5933	15.1952	181.761
240291	79.9	1.519	8.979		41.6872	15.2052	181.761
240491	79.76	1.519	8.978		41.6142	15.2052	181.741
240692	79.88	1.521	8.979		41.6768	15.2252	181.761
240892	79.86	1.522	8.982		41.6664	15.2352	181.822
241093	79.98	1.523	8.977		41.729	15.2452	181.721
241293	79.88	1.523	8.976		41.6768	15.2452	181.7
241493	80.12	1.525	8.979		41.802	15.2653	181.761
241693	80.1	1.526	8.975		41.7916	15.2753	181.68
241894	79.92	1.527	8.979		41.6977	15.2853	181.761
242096	80.4	1.529	8.977		41.9481	15.3053	181.721
242297	80.04	1.528	8.977		41.7603	15.2953	181.721
242497	80.3	1.531	8.979		41.8959	15.3253	181.761
242697	80.32	1.531	8.978		41.9064	15.3253	181.741
242898	80.36	1.532	8.976		41.9272	15.3353	181.7
243098	80.5	1.533	8.981		42.0003	15.3453	181.802
243299	80.56	1.534	8.98		42.0316	15.3554	181.781
243499	80.52	1.534	8.977		42.0107	15.3554	181.721
243699	80.62	1.535	8.979		42.0629	15.3654	181.761
243900	80.68	1.536	8.977		42.0942	15.3754	181.721
244100	80.66	1.538	8.979		42.0838	15.3954	181.761
244301	80.8	1.54	8.98		42.1568	15.4154	181.781
244501	80.62	1.54	8.978		42.0629	15.4154	181.741
244701	80.78	1.541	8.977		42.1464	15.4254	181.721
244901	80.76	1.541	8.977		42.1359	15.4254	181.721
245102	80.78	1.542	8.98		42.1464	15.4354	181.781
245304	80.9	1.544	8.978		42.209	15.4555	181.741
245505	80.94	1.544	8.978		42.2298	15.4555	181.741
245705	80.94	1.546	8.977		42.2298	15.4755	181.721
245905	81.04	1.547	8.98		42.282	15.4855	181.781
246106	81.12	1.548	8.98		42.3238	15.4955	181.781
246306	81.12	1.548	8.98		42.3238	15.4955	181.781
246507	81.12	1.548	8.98		42.3238	15.4955	181.781
246707	81.34	1.551	8.976		42.4385	15.5255	181.7
246907	81.34	1.551	8.976		42.4385	15.5255	181.7
247108	81.46	1.553	8.979		42.5011	15.5455	181.761
247308	81.34	1.553	8.979		42.4385	15.5455	181.761
247509	81.48	1.555	8.98		42.5116	15.5656	181.781
247709	81.48	1.555	8.978		42.5116	15.5656	181.741
247909	81.64	1.559	8.979		42.5951	15.6056	181.761
248110	80.9	1.557	8.981		42.209	15.5856	181.802
248310	81.26	1.559	8.977		42.3968	15.6056	181.721
248512	81.26	1.559	8.977		42.3968	15.6056	181.721
248713	81.26	1.559	8.977		42.3968	15.6056	181.721
248913	81.26	1.559	8.977		42.3968	15.6056	181.721
249113	81.26	1.559	8.977		42.3968	15.6056	181.721
249314	80.78	1.565	8.977		42.1464	15.6657	181.721
249514	81.14	1.565	8.98		42.3342	15.6657	181.781
249715	81.78	1.566	8.98		42.6681	15.6757	181.781
249915	81.82	1.568	8.979		42.689	15.6957	181.761
250115	81.9	1.567	8.981		42.7307	15.6857	181.802
250316	82.02	1.568	8.983		42.7933	15.6957	181.842
250516	81.98	1.57	8.98		42.7725	15.7157	181.781
250717	82.04	1.57	8.977		42.8038	15.7157	181.721
250917	82.2	1.572	8.981		42.8872	15.7357	181.802
251117	82.28	1.574	8.979		42.929	15.7558	181.761
251318	82.2	1.574	8.98		42.8872	15.7558	181.781
251518	82.3	1.575	8.981		42.9394	15.7658	181.802
251720	82.22	1.575	8.979		42.8977	15.7658	181.761
251921	82.38	1.577	8.98		42.9811	15.7858	181.781
252121	82.38	1.577	8.977		42.9811	15.7858	181.721
252321	82.5	1.578	8.981		43.0438	15.7958	181.802
252522	82.52	1.58	8.98		43.0542	15.8158	181.781
252722	82.58	1.58	8.977		43.0855	15.8158	181.721
252923	82.68	1.582	8.977		43.1377	15.8358	181.721
253123	82.62	1.583	8.979		43.1064	15.8458	181.761
253323	82.72	1.583	8.977		43.1585	15.8458	181.721
253524	82.72	1.585	8.979		43.1585	15.8659	181.761
253724	82.64	1.586	8.982		43.1168	15.8759	181.822
253925	82.76	1.587	8.98		43.1794	15.8859	181.781
254125	82.8	1.588	8.978		43.2003	15.8959	181.741
254325	82.76	1.588	8.979		43.1794	15.8959	181.761
254526	82.8	1.59	8.978		43.2003	15.9159	181.741
254726	82.92	1.59	8.982		43.2629	15.9159	181.822
254928	83.18	1.591	8.978		43.3985	15.9259	181.741
255129	83.1	1.594	8.98		43.3568	15.956	181.781
255329	83.12	1.595	8.978		43.3672	15.966	181.741
255529	83.12	1.595	8.979		43.3672	15.966	181.761
255730	83.16	1.596	8.979		43.3881	15.976	181.761
255930	83.16	1.597	8.977		43.3881	15.986	181.721
256131	83.26	1.598	8.979		43.4403	15.996	181.761
256331	83.32	1.599	8.976		43.4716	16.006	181.7
256531	83.36	1.6	8.979		43.4925	16.016	181.761
256732	83.46	1.601	8.979		43.5446	16.026	181.761
256932	83.44	1.602	8.98		43.5342	16.036	181.781
257133	83.46	1.603	8.977		43.5446	16.046	181.721
257333	83.4	1.604	8.977		43.5133	16.0561	181.721
257533	83.36	1.605	8.977		43.4925	16.0661	181.721
257734	83.6	1.606	8.979		43.6177	16.0761	181.761
257934	83.52	1.607	8.978		43.5759	16.0861	181.741
258136	83.68	1.608	8.977		43.6594	16.0961	181.721
258337	83.72	1.609	8.975		43.6803	16.1061	181.68
258537	83.68	1.609	8.98		43.6594	16.1061	181.781
258737	83.78	1.611	8.979		43.7116	16.1261	181.761
258938	83.64	1.611	8.98		43.6385	16.1261	181.781
259138	83.78	1.613	8.978		43.7116	16.1461	181.741
259339	84.02	1.614	8.978		43.8368	16.1562	181.741
259539	83.98	1.615	8.978		43.8159	16.1662	181.741
259739	84.04	1.615	8.977		43.8472	16.1662	181.721
259940	83.98	1.617	8.978		43.8159	16.1862	181.741
260140	84.04	1.617	8.979		43.8472	16.1862	181.761
260341	84.08	1.619	8.978		43.8681	16.2062	181.741
260541	84.08	1.62	8.978		43.8681	16.2162	181.741
260741	84.28	1.622	8.979		43.9725	16.2362	181.761
260942	84.24	1.622	8.978		43.9516	16.2362	181.741
261142	84.26	1.623	8.975		43.962	16.2462	181.68
261343	84.32	1.624	8.978		43.9933	16.2563	181.741
261543	84.32	1.625	8.977		43.9933	16.2663	181.721
261743	84.48	1.626	8.979		44.0768	16.2763	181.761
261943	84.22	1.627	8.977		43.9412	16.2863	181.721
262144	84.46	1.628	8.98		44.0664	16.2963	181.781
262346	84.26	1.629	8.98		43.962	16.3063	181.781
262547	84.66	1.629	8.979		44.1707	16.3063	181.761
262747	84.38	1.63	8.982		44.0246	16.3163	181.822
262947	84.44	1.634	8.979		44.0559	16.3564	181.761
263148	84.28	1.634	8.979		43.9725	16.3564	181.761
263348	83.98	1.635	8.98		43.8159	16.3664	181.781
263549	84.54	1.635	8.979		44.1081	16.3664	181.761
263749	84.5	1.637	8.979		44.0872	16.3864	181.761
263949	84.8	1.637	8.977		44.2438	16.3864	181.721
264150	84.6	1.638	8.979		44.1394	16.3964	181.761
264350	84.84	1.639	8.98		44.2646	16.4064	181.781
264551	84.7	1.641	8.979		44.1916	16.4264	181.761
264751	84.3	1.642	8.979		43.9829	16.4364	181.761
264951	84.82	1.643	8.978		44.2542	16.4464	181.741
265151	84.94	1.642	8.979		44.3168	16.4364	181.761
265352	84.94	1.645	8.977		44.3168	16.4665	181.721
265554	84.94	1.645	8.975		44.3168	16.4665	181.68
265755	85.08	1.646	8.978		44.3899	16.4765	181.741
265955	85.08	1.647	8.979		44.3899	16.4865	181.761
266155	85.24	1.648	8.977		44.4733	16.4965	181.721
266356	85.14	1.649	8.976		44.4212	16.5065	181.7
266556	85.5	1.65	8.981		44.609	16.5165	181.802
266757	85.24	1.651	8.98		44.4733	16.5265	181.781
266957	85.48	1.652	8.979		44.5985	16.5365	181.761
267157	85.34	1.653	8.979		44.5255	16.5465	181.761
267358	85.46	1.654	8.977		44.5881	16.5566	181.721
267558	85.42	1.655	8.979		44.5672	16.5666	181.761
267759	85.46	1.656	8.978		44.5881	16.5766	181.741
267959	85.58	1.656	8.982		44.6507	16.5766	181.822
268159	85.78	1.659	8.977		44.7551	16.6066	181.721
268360	85.78	1.659	8.977		44.7551	16.6066	181.721
268560	85.52	1.659	8.977		44.6194	16.6066	181.721
268762	85.74	1.661	8.977		44.7342	16.6266	181.721
268963	85.76	1.662	8.977		44.7446	16.6366	181.721
269163	85.76	1.662	8.977		44.7446	16.6366	181.721
269363	85.76	1.662	8.977		44.7446	16.6366	181.721
269564	85.4	1.665	8.978		44.5568	16.6667	181.741
269764	85.7	1.666	8.979		44.7133	16.6767	181.761
269965	84.76	1.669	8.981		44.2229	16.7067	181.802
270165	85.18	1.668	8.978		44.442	16.6967	181.741
270365	85.54	1.669	8.979		44.6299	16.7067	181.761
270566	85.76	1.67	8.979		44.7446	16.7167	181.761
270766	85.8	1.671	8.98		44.7655	16.7267	181.781
270967	86.06	1.672	8.976		44.9012	16.7367	181.7
271167	86.22	1.673	8.977		44.9846	16.7467	181.721
271367	86.12	1.674	8.978		44.9325	16.7568	181.741
271568	86.18	1.675	8.979		44.9638	16.7668	181.761
271768	86	1.676	8.975		44.8699	16.7768	181.68
271970	86.26	1.677	8.978		45.0055	16.7868	181.741
272171	86.22	1.677	8.977		44.9846	16.7868	181.721
272371	86.3	1.678	8.98		45.0264	16.7968	181.781
272571	86.4	1.681	8.98		45.0786	16.8268	181.781
272772	86.5	1.681	8.979		45.1307	16.8268	181.761
272972	86.26	1.682	8.98		45.0055	16.8368	181.781
273173	86.02	1.682	8.977		44.8803	16.8368	181.721
273373	86.52	1.684	8.976		45.1412	16.8569	181.7
273573	86.58	1.684	8.98		45.1725	16.8569	181.781
273774	86.5	1.686	8.978		45.1307	16.8769	181.741
273974	86.6	1.686	8.977		45.1829	16.8769	181.721
274175	86.62	1.688	8.981		45.1933	16.8969	181.802
274375	87.04	1.689	8.982		45.4125	16.9069	181.822
274575	87.04	1.689	8.982		45.4125	16.9069	181.822
274776	86.72	1.692	8.981		45.2455	16.9369	181.802
274976	86.86	1.692	8.98		45.3186	16.9369	181.781
275178	86.96	1.694	8.979		45.3707	16.957	181.761
275379	87.02	1.694	8.979		45.402	16.957	181.761
275579	86.92	1.695	8.979		45.3499	16.967	181.761
275779	87.06	1.696	8.98		45.4229	16.977	181.781
275980	87.34	1.697	8.981		45.569	16.987	181.802
276180	87.34	1.697	8.981		45.569	16.987	181.802
276381	87.12	1.7	8.98		45.4542	17.017	181.781
276581	87.14	1.699	8.979		45.4646	17.007	181.761
276781	87.14	1.699	8.979		45.4646	17.007	181.761
276982	87.14	1.699	8.979		45.4646	17.007	181.761
277182	86.92	1.703	8.978		45.3499	17.047	181.741
277383	86.88	1.704	8.975		45.329	17.0571	181.68
277583	87.24	1.706	8.975		45.5168	17.0771	181.68
277783	87.32	1.706	8.977		45.5586	17.0771	181.721
277984	87.44	1.707	8.979		45.6212	17.0871	181.761
278184	87.3	1.708	8.976		45.5481	17.0971	181.7
278386	87.44	1.709	8.981		45.6212	17.1071	181.802
278587	87.58	1.71	8.979		45.6942	17.1171	181.761
278787	87.54	1.711	8.978		45.6733	17.1271	181.741
278987	87.72	1.712	8.981		45.7673	17.1371	181.802
279188	87.38	1.712	8.982		45.5899	17.1371	181.822
279388	87.5	1.715	8.98		45.6525	17.1672	181.781
279589	87.76	1.715	8.98		45.7881	17.1672	181.781
279789	87.84	1.716	8.977		45.8299	17.1772	181.721
279989	88	1.717	8.977		45.9133	17.1872	181.721
280190	87.6	1.719	8.978		45.7046	17.2072	181.741
280390	88.02	1.72	8.976		45.9238	17.2172	181.7
280591	87.88	1.72	8.978		45.8507	17.2172	181.741
280791	88.18	1.72	8.978		46.0073	17.2172	181.741
280991	87.98	1.72	8.979		45.9029	17.2172	181.761
281192	88.1	1.723	8.978		45.9655	17.2472	181.741
281392	88.06	1.724	8.979		45.9446	17.2573	181.761
281593	88.06	1.724	8.976		45.9446	17.2573	181.7
281793	88.26	1.726	8.978		46.049	17.2773	181.741
281993	88.16	1.726	8.979		45.9968	17.2773	181.761
282193	87.94	1.728	8.979		45.882	17.2973	181.761
282394	88.34	1.728	8.981		46.0907	17.2973	181.802
282596	87.76	1.73	8.98		45.7881	17.3173	181.781
282797	88.1	1.732	8.979		45.9655	17.3373	181.761
282997	88.3	1.732	8.976		46.0699	17.3373	181.7
283197	88.32	1.733	8.978		46.0803	17.3473	181.741
283398	88.44	1.735	8.98		46.1429	17.3674	181.781
283598	88.52	1.735	8.974		46.1846	17.3674	181.66
283799	88.44	1.736	8.98		46.1429	17.3774	181.781
283999	88.72	1.737	8.979		46.289	17.3874	181.761
284199	89.14	1.741	8.977		46.5081	17.4274	181.721
284400	89.14	1.741	8.977		46.5081	17.4274	181.721
284600	88.68	1.74	8.978		46.2681	17.4174	181.741
284801	88.66	1.74	8.977		46.2577	17.4174	181.721
285001	88.76	1.742	8.977		46.3099	17.4374	181.721
285201	88.76	1.742	8.977		46.3099	17.4374	181.721
285401	88.7	1.745	8.979		46.2786	17.4675	181.761
285602	88.76	1.745	8.976		46.3099	17.4675	181.7
285804	88.78	1.747	8.979		46.3203	17.4875	181.761
286005	88.84	1.747	8.979		46.3516	17.4875	181.761
286205	88.84	1.747	8.979		46.3516	17.4875	181.761
286405	89.1	1.749	8.981		46.4873	17.5075	181.802
286606	89.36	1.75	8.977		46.6229	17.5175	181.721
286806	89.36	1.75	8.977		46.6229	17.5175	181.721
287007	89.06	1.752	8.978		46.4664	17.5375	181.741
287207	89.38	1.754	8.98		46.6333	17.5576	181.781
287407	88.86	1.754	8.981		46.362	17.5576	181.802
287608	88.86	1.754	8.981		46.362	17.5576	181.802
287808	88.84	1.756	8.979		46.3516	17.5776	181.761
288009	89.24	1.757	8.98		46.5603	17.5876	181.781
288209	89.52	1.758	8.981		46.7064	17.5976	181.802
288409	89.26	1.76	8.977		46.5707	17.6176	181.721
288610	89.64	1.76	8.981		46.769	17.6176	181.802
288810	89.02	1.761	8.979		46.4455	17.6276	181.761
289012	89.28	1.761	8.98		46.5812	17.6276	181.781
289213	89.2	1.762	8.977		46.5394	17.6376	181.721
289413	89.52	1.764	8.978		46.7064	17.6577	181.741
289613	89.66	1.765	8.976		46.7794	17.6677	181.7
289814	89.76	1.766	8.981		46.8316	17.6777	181.802
290014	89.76	1.766	8.981		46.8316	17.6777	181.802
290215	89.68	1.768	8.978		46.7899	17.6977	181.741
290415	89.76	1.768	8.976		46.8316	17.6977	181.7
290615	89.22	1.77	8.978		46.5499	17.7177	181.741
290816	89.7	1.771	8.979		46.8003	17.7277	181.761
291016	89.74	1.772	8.977		46.8212	17.7377	181.721
291217	89.92	1.774	8.977		46.9151	17.7578	181.721
291417	89.7	1.774	8.978		46.8003	17.7578	181.741
291617	89.88	1.774	8.979		46.8942	17.7578	181.761
291818	90.14	1.776	8.978		47.0299	17.7778	181.741
292018	90.02	1.778	8.979		46.9673	17.7978	181.761
292220	89.52	1.778	8.977		46.7064	17.7978	181.721
292421	89.76	1.779	8.977		46.8316	17.8078	181.721
292621	89.96	1.78	8.978		46.936	17.8178	181.741
292821	90.08	1.78	8.979		46.9986	17.8178	181.761
293022	89.88	1.783	8.978		46.8942	17.8478	181.741
293222	89.96	1.784	8.977		46.936	17.8579	181.721
293423	90.32	1.784	8.98		47.1238	17.8579	181.781
293623	90.18	1.784	8.977		47.0507	17.8579	181.721
293823	90.18	1.784	8.977		47.0507	17.8579	181.721
294024	89.9	1.788	8.98		46.9047	17.8979	181.781
294224	90.28	1.788	8.982		47.1029	17.8979	181.822
294425	90.56	1.789	8.978		47.249	17.9079	181.741
294625	90.46	1.789	8.98		47.1968	17.9079	181.781
294825	90.1	1.791	8.979		47.009	17.9279	181.761
295026	90.56	1.793	8.98		47.249	17.9479	181.781
295226	90.72	1.794	8.98		47.3325	17.958	181.781
295428	90.68	1.794	8.979		47.3116	17.958	181.761
295629	90.68	1.794	8.979		47.3116	17.958	181.761
295829	90.08	1.797	8.977		46.9986	17.988	181.721
296029	90.56	1.797	8.979		47.249	17.988	181.761
296230	90.66	1.798	8.979		47.3012	17.998	181.761
296430	90.78	1.8	8.976		47.3638	18.018	181.7
296631	90.84	1.799	8.981		47.3951	18.008	181.802
296831	91.3	1.802	8.978		47.6351	18.038	181.741
297031	91.3	1.802	8.978		47.6351	18.038	181.741
297232	89.92	1.804	8.979		46.9151	18.0581	181.761
297432	90.24	1.804	8.976		47.082	18.0581	181.7
297633	90.98	1.805	8.979		47.4681	18.0681	181.761
297833	90.84	1.806	8.978		47.3951	18.0781	181.741
298033	91.16	1.807	8.978		47.562	18.0881	181.741
298234	91.12	1.808	8.977		47.5412	18.0981	181.721
298434	91.24	1.809	8.979		47.6038	18.1081	181.761
298636	90.62	1.81	8.977		47.2803	18.1181	181.721
298837	90.14	1.81	8.979		47.0299	18.1181	181.761
299037	89.78	1.811	8.979		46.842	18.1281	181.761
299237	90.76	1.814	8.978		47.3533	18.1582	181.741
299438	91.26	1.814	8.977		47.6142	18.1582	181.721
299638	91.3	1.815	8.977		47.6351	18.1682	181.721
299839	91.26	1.816	8.979		47.6142	18.1782	181.761
300039	91.56	1.818	8.979		47.7707	18.1982	181.761
300239	91.36	1.818	8.978		47.6664	18.1982	181.741
300440	91.54	1.819	8.979		47.7603	18.2082	181.761
300640	91.34	1.82	8.977		47.656	18.2182	181.721
300841	91.7	1.822	8.981		47.8438	18.2382	181.802
301041	91.58	1.821	8.979		47.7812	18.2282	181.761
301241	91.82	1.824	8.978		47.9064	18.2583	181.741
301442	91.78	1.824	8.978		47.8855	18.2583	181.741
301642	91.68	1.824	8.979		47.8334	18.2583	181.761
301843	91.64	1.827	8.98		47.8125	18.2883	181.781
302043	91.72	1.828	8.981		47.8542	18.2983	181.802
302243	91.76	1.828	8.977		47.8751	18.2983	181.721
302443	92.04	1.83	8.98		48.0212	18.3183	181.781
302644	92.04	1.83	8.98		48.0212	18.3183	181.781
302846	91.84	1.83	8.981		47.9168	18.3183	181.802
303047	91.84	1.832	8.979		47.9168	18.3383	181.761
303247	91.92	1.833	8.976		47.9586	18.3483	181.7
303447	91.76	1.834	8.978		47.8751	18.3584	181.741
303648	91.86	1.834	8.978		47.9273	18.3584	181.741
303848	91.94	1.836	8.978		47.969	18.3784	181.741
304049	91.96	1.838	8.98		47.9794	18.3984	181.781
304249	91.96	1.838	8.98		47.9794	18.3984	181.781
304449	91.96	1.838	8.98		47.9794	18.3984	181.781
304650	91.96	1.838	8.98		47.9794	18.3984	181.781
304850	91.94	1.84	8.983		47.969	18.4184	181.842
305051	91.94	1.84	8.983		47.969	18.4184	181.842
305251	91.94	1.84	8.983		47.969	18.4184	181.842
305451	92.18	1.844	8.977		48.0942	18.4585	181.721
305651	92.18	1.844	8.977		48.0942	18.4585	181.721
305852	92.18	1.844	8.977		48.0942	18.4585	181.721
306054	92.18	1.844	8.977		48.0942	18.4585	181.721
306255	90.3	1.848	8.978		47.1133	18.4985	181.741
306455	90.08	1.844	8.977		46.9986	18.4585	181.721
306655	89.86	1.85	8.979		46.8838	18.5185	181.761
306856	90.7	1.852	8.978		47.322	18.5385	181.741
307056	90.7	1.852	8.978		47.322	18.5385	181.741
307257	90.48	1.854	8.978		47.2073	18.5586	181.741
307457	91.3	1.854	8.979		47.6351	18.5586	181.761
307657	91.66	1.854	8.978		47.8229	18.5586	181.741
307858	92.72	1.856	8.982		48.376	18.5786	181.822
308058	92.54	1.857	8.98		48.2821	18.5886	181.781
308259	92.84	1.858	8.98		48.4386	18.5986	181.781
308459	92.44	1.859	8.981		48.2299	18.6086	181.802
308659	92.44	1.859	8.981		48.2299	18.6086	181.802
308860	91.98	1.861	8.979		47.9899	18.6286	181.761
309060	91.96	1.862	8.98		47.9794	18.6386	181.781
309262	91.98	1.862	8.976		47.9899	18.6386	181.7
309463	93.04	1.864	8.979		48.5429	18.6587	181.761
309663	92.96	1.865	8.977		48.5012	18.6687	181.721
309863	92.82	1.866	8.977		48.4281	18.6787	181.721
310064	92.96	1.867	8.978		48.5012	18.6887	181.741
310264	92.56	1.869	8.975		48.2925	18.7087	181.68
310465	92.08	1.868	8.979		48.0421	18.6987	181.761
310665	92.08	1.868	8.979		48.0421	18.6987	181.761
310865	92.08	1.868	8.979		48.0421	18.6987	181.761
311066	92.08	1.868	8.979		48.0421	18.6987	181.761
311266	92.02	1.873	8.976		48.0107	18.7487	181.7
311467	92.8	1.874	8.979		48.4177	18.7588	181.761
311667	93.12	1.875	8.976		48.5847	18.7688	181.7
311867	93.26	1.876	8.977		48.6577	18.7788	181.721
312068	93.42	1.876	8.98		48.7412	18.7788	181.781
312268	93.64	1.878	8.979		48.856	18.7988	181.761
312470	93.64	1.878	8.979		48.856	18.7988	181.761
312671	93.34	1.878	8.98		48.6994	18.7988	181.781
312871	93.34	1.878	8.98		48.6994	18.7988	181.781
313071	92.42	1.881	8.979		48.2194	18.8288	181.761
313272	92.42	1.881	8.979		48.2194	18.8288	181.761
313472	92.42	1.881	8.979		48.2194	18.8288	181.761
313673	92.42	1.881	8.979		48.2194	18.8288	181.761
313873	92.42	1.881	8.979		48.2194	18.8288	181.761
314073	92.34	1.888	8.978		48.1777	18.8989	181.741
314274	93.4	1.888	8.978		48.7308	18.8989	181.741
314474	93.32	1.889	8.98		48.689	18.9089	181.781
314675	92.98	1.889	8.979		48.5116	18.9089	181.761
314875	92.98	1.889	8.979		48.5116	18.9089	181.761
315075	92.98	1.889	8.979		48.5116	18.9089	181.761
315276	92.98	1.889	8.979		48.5116	18.9089	181.761
315476	92.98	1.889	8.979		48.5116	18.9089	181.761
315678	91.5	1.89	8.974		47.7394	18.9189	181.66
315879	91.72	1.891	8.975		47.8542	18.9289	181.68
316079	91.72	1.891	8.975		47.8542	18.9289	181.68
316279	91.72	1.891	8.975		47.8542	18.9289	181.68
316480	91.72	1.891	8.975		47.8542	18.9289	181.68
316680	91.72	1.891	8.975		47.8542	18.9289	181.68
316881	92.32	1.898	8.98		48.1673	18.999	181.781
317081	92.32	1.898	8.98		48.1673	18.999	181.781
317281	92.46	1.907	8.976		48.2403	19.0891	181.7
317482	92.52	1.903	8.978		48.2716	19.049	181.741
317682	92.52	1.903	8.978		48.2716	19.049	181.741
317883	94.4	1.909	8.98		49.2525	19.1091	181.781
318083	94.4	1.908	8.98		49.2525	19.0991	181.781
318283	94.4	1.908	8.98		49.2525	19.0991	181.781
318484	93.8	1.909	8.983		48.9394	19.1091	181.842
318684	93.62	1.909	8.98		48.8455	19.1091	181.781
318886	93.42	1.911	8.977		48.7412	19.1291	181.721
319087	93.42	1.911	8.977		48.7412	19.1291	181.721
319287	93.42	1.911	8.977		48.7412	19.1291	181.721
319487	93.84	1.913	8.978		48.9603	19.1491	181.741
319688	94.1	1.916	8.978		49.096	19.1792	181.741
319888	94.6	1.916	8.977		49.3568	19.1792	181.721
320089	94.46	1.917	8.979		49.2838	19.1892	181.761
320289	94.76	1.918	8.976		49.4403	19.1992	181.7
320489	94.76	1.92	8.978		49.4403	19.2192	181.741
320690	94.82	1.92	8.975		49.4716	19.2192	181.68
320890	95.1	1.919	8.98		49.6177	19.2092	181.781
321091	95.1	1.919	8.98		49.6177	19.2092	181.781
321291	95.1	1.919	8.98		49.6177	19.2092	181.781
321491	94.84	1.924	8.979		49.4821	19.2593	181.761
321692	95.16	1.925	8.979		49.649	19.2693	181.761
321892	94.96	1.926	8.981		49.5447	19.2793	181.802
322093	94.58	1.926	8.978		49.3464	19.2793	181.741
322293	95.14	1.928	8.976		49.6386	19.2993	181.7
322493	95.26	1.929	8.978		49.7012	19.3093	181.741
322693	95.26	1.929	8.978		49.7012	19.3093	181.741
322894	95.26	1.929	8.978		49.7012	19.3093	181.741
323096	95.52	1.935	8.978		49.8368	19.3694	181.741
323297	95.52	1.935	8.978		49.8368	19.3694	181.741
323497	95.52	1.935	8.978		49.8368	19.3694	181.741
323697	94.58	1.935	8.976		49.3464	19.3694	181.7
323898	94.08	1.936	8.978		49.0855	19.3794	181.741
324098	94.08	1.936	8.978		49.0855	19.3794	181.741
324299	94.08	1.936	8.978		49.0855	19.3794	181.741
324499	94.44	1.938	8.978		49.2734	19.3994	181.741
324699	94.44	1.938	8.978		49.2734	19.3994	181.741
324900	94.44	1.938	8.978		49.2734	19.3994	181.741
325100	94.08	1.944	8.978		49.0855	19.4595	181.741
325301	94.72	1.943	8.979		49.4195	19.4494	181.761
325501	94.46	1.944	8.979		49.2838	19.4595	181.761
325701	94.46	1.944	8.979		49.2838	19.4595	181.761
325901	94.46	1.944	8.979		49.2838	19.4595	181.761
326102	94.46	1.944	8.979		49.2838	19.4595	181.761
326304	95.08	1.948	8.978		49.6073	19.4995	181.741
326505	95.56	1.949	8.977		49.8577	19.5095	181.721
326705	95.8	1.949	8.977		49.9829	19.5095	181.721
326905	95.8	1.949	8.977		49.9829	19.5095	181.721
327106	95.82	1.953	8.98		49.9934	19.5495	181.781
327306	95.64	1.953	8.976		49.8995	19.5495	181.7
327507	95.08	1.953	8.98		49.6073	19.5495	181.781
327707	94.58	1.961	8.976		49.3464	19.6296	181.7
327907	94.72	1.954	8.981		49.4195	19.5596	181.802
328108	94.72	1.954	8.981		49.4195	19.5596	181.802
328308	94.42	1.958	8.981		49.2629	19.5996	181.802
328509	94.42	1.958	8.981		49.2629	19.5996	181.802
328709	94.42	1.958	8.981		49.2629	19.5996	181.802
328909	94.06	1.961	8.982		49.0751	19.6296	181.822
329110	95.44	1.963	8.979		49.7951	19.6496	181.761
329310	95.96	1.963	8.979		50.0664	19.6496	181.761
329512	95.88	1.965	8.981		50.0247	19.6697	181.802
329713	96.06	1.966	8.978		50.1186	19.6797	181.741
329913	96.06	1.966	8.978		50.1186	19.6797	181.741
330113	96.32	1.967	8.975		50.2542	19.6897	181.68
330314	96.22	1.968	8.981		50.2021	19.6997	181.802
330514	95.94	1.969	8.978		50.056	19.7097	181.741
330715	96.16	1.97	8.977		50.1708	19.7197	181.721
330915	96.28	1.971	8.979		50.2334	19.7297	181.761
331115	96.14	1.973	8.979		50.1603	19.7497	181.761
331316	96.48	1.973	8.979		50.3377	19.7497	181.761
331516	95.9	1.974	8.979		50.0351	19.7598	181.761
331717	95.98	1.975	8.978		50.0768	19.7698	181.741
331917	96.76	1.976	8.98		50.4838	19.7798	181.781
332117	96.28	1.978	8.977		50.2334	19.7998	181.721
332318	96.28	1.978	8.977		50.2334	19.7998	181.721
332518	96.28	1.978	8.977		50.2334	19.7998	181.721
332720	96.06	1.979	8.976		50.1186	19.8098	181.7
332921	96.06	1.979	8.976		50.1186	19.8098	181.7
333121	96.12	1.982	8.983		50.1499	19.8398	181.842
333321	96.46	1.983	8.975		50.3273	19.8498	181.68
333522	96.3	1.983	8.978		50.2438	19.8498	181.741
333722	96.38	1.985	8.977		50.2855	19.8699	181.721
333923	96.38	1.985	8.977		50.2855	19.8699	181.721
334123	96.18	1.987	8.977		50.1812	19.8899	181.721
334323	96.1	1.988	8.976		50.1395	19.8999	181.7
334524	96.1	1.988	8.976		50.1395	19.8999	181.7
334724	96.1	1.988	8.976		50.1395	19.8999	181.7
334925	96.64	1.992	8.979		50.4212	19.9399	181.761
335125	96.78	1.992	8.982		50.4942	19.9399	181.822
335325	96.88	1.992	8.977		50.5464	19.9399	181.721
335526	96.9	1.994	8.981		50.5568	19.96	181.802
335726	96.9	1.994	8.981		50.5568	19.96	181.802
335928	97.14	1.996	8.983		50.6821	19.98	181.842
336129	97.22	1.997	8.979		50.7238	19.99	181.761
336329	96.92	1.998	8.977		50.5673	20	181.721
336529	96.92	1.998	8.977		50.5673	20	181.721
336730	96.48	2	8.981		50.3377	20.02	181.802
336930	97.56	2	8.977		50.9012	20.02	181.721
337131	97.18	2.002	8.977		50.7029	20.04	181.721
337331	97.62	2.003	8.978		50.9325	20.0501	181.741
337531	97.62	2.003	8.978		50.9325	20.0501	181.741
337732	97.6	2.005	8.978		50.9221	20.0701	181.741
337932	97.6	2.005	8.978		50.9221	20.0701	181.741
338133	97.6	2.008	8.979		50.9221	20.1001	181.761
338333	97.6	2.008	8.979		50.9221	20.1001	181.761
338533	97.84	2.01	8.982		51.0473	20.1201	181.822
338734	97.84	2.01	8.982		51.0473	20.1201	181.822
338934	97.66	2.011	8.977		50.9534	20.1301	181.721
339136	97.56	2.012	8.978		50.9012	20.1401	181.741
339337	97.82	2.013	8.979		51.0369	20.1502	181.761
339537	97.52	2.014	8.979		50.8803	20.1602	181.761
339737	97.9	2.015	8.978		51.0786	20.1702	181.741
339938	97.9	2.015	8.978		51.0786	20.1702	181.741
340138	97.9	2.017	8.977		51.0786	20.1902	181.721
340339	97.9	2.017	8.977		51.0786	20.1902	181.721
340539	98.1	2.019	8.979		51.1829	20.2102	181.761
340739	97.86	2.019	8.978		51.0577	20.2102	181.741
340940	98	2.021	8.976		51.1308	20.2302	181.7
341140	98.16	2.021	8.979		51.2142	20.2302	181.761
341341	98.16	2.021	8.979		51.2142	20.2302	181.761
341541	98.18	2.024	8.979		51.2247	20.2603	181.761
341741	98.16	2.026	8.979		51.2142	20.2803	181.761
341942	97.64	2.026	8.976		50.9429	20.2803	181.7
342142	97.46	2.027	8.977		50.849	20.2903	181.721
342343	98.12	2.028	8.982		51.1934	20.3003	181.822
342543	98.22	2.029	8.98		51.2455	20.3103	181.781
342743	98.18	2.03	8.979		51.2247	20.3203	181.761
342943	98.22	2.031	8.981		51.2455	20.3303	181.802
343144	98.38	2.032	8.978		51.329	20.3403	181.741
343346	98.4	2.034	8.982		51.3395	20.3604	181.822
343547	98.18	2.034	8.976		51.2247	20.3604	181.7
343747	98.36	2.035	8.98		51.3186	20.3704	181.781
343947	98.36	2.036	8.975		51.3186	20.3804	181.68
344148	98.42	2.037	8.98		51.3499	20.3904	181.781
344348	98.44	2.039	8.978		51.3603	20.4104	181.741
344549	97.88	2.038	8.979		51.0682	20.4004	181.761
344749	98.38	2.041	8.979		51.329	20.4304	181.761
344949	98.4	2.042	8.975		51.3395	20.4404	181.68
345150	98.48	2.042	8.978		51.3812	20.4404	181.741
345350	98.3	2.043	8.978		51.2873	20.4505	181.741
345551	98.46	2.044	8.978		51.3708	20.4605	181.741
345751	98.44	2.045	8.977		51.3603	20.4705	181.721
345951	98.5	2.046	8.979		51.3916	20.4805	181.761
346151	98.64	2.048	8.979		51.4647	20.5005	181.761
346352	98.46	2.048	8.977		51.3708	20.5005	181.721
346554	98.76	2.049	8.979		51.5273	20.5105	181.761
346755	98.54	2.051	8.98		51.4125	20.5305	181.781
346955	98.66	2.051	8.981		51.4751	20.5305	181.802
347155	99.16	2.049	8.979		51.736	20.5105	181.761
347356	99.16	2.049	8.979		51.736	20.5105	181.761
347556	97.56	2.053	8.981		50.9012	20.5506	181.802
347757	97.56	2.053	8.981		50.9012	20.5506	181.802
347957	98.44	2.056	8.982		51.3603	20.5806	181.822
348157	98.82	2.057	8.977		51.5586	20.5906	181.721
348358	98.86	2.058	8.98		51.5795	20.6006	181.781
348558	98.86	2.058	8.98		51.5795	20.6006	181.781
348759	97.42	2.06	8.98		50.8282	20.6206	181.781
348959	96.58	2.065	8.976		50.3899	20.6707	181.7
349159	96.46	2.063	8.972		50.3273	20.6507	181.619
349360	97.88	2.064	8.98		51.0682	20.6607	181.781
349560	97.88	2.064	8.98		51.0682	20.6607	181.781
349762	97.88	2.064	8.98		51.0682	20.6607	181.781
349963	97.88	2.064	8.98		51.0682	20.6607	181.781
350163	97.88	2.064	8.98		51.0682	20.6607	181.781
350363	97.88	2.064	8.98		51.0682	20.6607	181.781
350564	98.34	2.069	8.983		51.3082	20.7107	181.842
350764	99.26	2.07	8.978		51.7882	20.7207	181.741
350965	99.26	2.07	8.978		51.7882	20.7207	181.741
351165	99.26	2.07	8.978		51.7882	20.7207	181.741
351365	99.26	2.07	8.978		51.7882	20.7207	181.741
351566	98.46	2.074	8.979		51.3708	20.7608	181.761
351766	98.7	2.075	8.98		51.496	20.7708	181.781
351967	99.08	2.076	8.979		51.6942	20.7808	181.761
352167	99.16	2.078	8.979		51.736	20.8008	181.761
352367	99.44	2.078	8.979		51.8821	20.8008	181.761
352568	99.36	2.079	8.981		51.8403	20.8108	181.802
352768	99.34	2.08	8.977		51.8299	20.8208	181.721
352970	99.22	2.08	8.975		51.7673	20.8208	181.68
353171	99.22	2.08	8.975		51.7673	20.8208	181.68
353371	99.06	2.083	8.979		51.6838	20.8509	181.761
353571	99.54	2.085	8.978		51.9342	20.8709	181.741
353772	99.36	2.086	8.98		51.8403	20.8809	181.781
353972	99.54	2.086	8.976		51.9342	20.8809	181.7
354173	99.5	2.086	8.977		51.9134	20.8809	181.721
354373	99	2.088	8.98		51.6525	20.9009	181.781
354573	99.8	2.089	8.979		52.0699	20.9109	181.761
354774	99.7	2.09	8.978		52.0177	20.9209	181.741
354974	99.74	2.091	8.981		52.0386	20.9309	181.802
355175	99.74	2.091	8.981		52.0386	20.9309	181.802
355375	99.66	2.092	8.981		51.9969	20.9409	181.802
355575	99.9	2.094	8.975		52.1221	20.961	181.68
355776	99.34	2.095	8.979		51.8299	20.971	181.761
355976	99.74	2.096	8.978		52.0386	20.981	181.741
356178	99.7	2.098	8.977		52.0177	21.001	181.721
356379	99.94	2.099	8.98		52.1429	21.011	181.781
356579	99.92	2.1	8.976		52.1325	21.021	181.7
356779	99.98	2.1	8.977		52.1638	21.021	181.721
356980	99.9	2.101	8.976		52.1221	21.031	181.7
357180	100.06	2.101	8.979		52.2056	21.031	181.761
357381	100	2.103	8.982		52.1743	21.0511	181.822
357581	100	2.103	8.982		52.1743	21.0511	181.822
357781	99.12	2.11	8.981		51.7151	21.1211	181.802
357982	99.12	2.11	8.981		51.7151	21.1211	181.802
358182	99.14	2.104	8.98		51.7256	21.0611	181.781
358383	99.14	2.104	8.98		51.7256	21.0611	181.781
358583	99	2.111	8.979		51.6525	21.1311	181.761
358783	99.92	2.111	8.978		52.1325	21.1311	181.741
358984	99.9	2.111	8.979		52.1221	21.1311	181.761
359184	100.2	2.113	8.977		52.2786	21.1512	181.721
359386	100.3	2.114	8.98		52.3308	21.1612	181.781
359587	100.06	2.115	8.979		52.2056	21.1712	181.761
359787	100.26	2.116	8.981		52.3099	21.1812	181.802
359987	100.26	2.115	8.979		52.3099	21.1712	181.761
360188	100.3	2.117	8.979		52.3308	21.1912	181.761
360388	100.16	2.118	8.978		52.2577	21.2012	181.741
360589	100.14	2.119	8.977		52.2473	21.2112	181.721
360789	100.42	2.121	8.98		52.3934	21.2312	181.781
360989	100.44	2.122	8.98		52.4038	21.2412	181.781
361190	100.34	2.122	8.98		52.3516	21.2412	181.781
361390	100.38	2.124	8.977		52.3725	21.2613	181.721
361591	100.44	2.125	8.976		52.4038	21.2713	181.7
361791	100.44	2.125	8.976		52.4038	21.2713	181.7
361991	97.48	2.125	8.979		50.8595	21.2713	181.761
362192	97.58	2.131	8.974		50.9116	21.3313	181.66
362392	97.58	2.131	8.974		50.9116	21.3313	181.66
362593	97.56	2.129	8.978		50.9012	21.3113	181.741
362793	100.14	2.13	8.978		52.2473	21.3213	181.741
362993	100.3	2.13	8.978		52.3308	21.3213	181.741
363193	100.68	2.133	8.978		52.529	21.3514	181.741
363394	100.66	2.134	8.976		52.5186	21.3614	181.7
363596	100.9	2.135	8.978		52.6438	21.3714	181.741
363797	100.54	2.136	8.98		52.456	21.3814	181.781
363997	100.72	2.137	8.979		52.5499	21.3914	181.761
364197	100.78	2.137	8.979		52.5812	21.3914	181.761
364398	100.76	2.139	8.977		52.5708	21.4114	181.721
364598	100.42	2.141	8.979		52.3934	21.4314	181.761
364799	100.62	2.141	8.977		52.4977	21.4314	181.721
364999	100.7	2.142	8.98		52.5395	21.4414	181.781
365199	100.86	2.142	8.98		52.6229	21.4414	181.781
365400	100.76	2.143	8.981		52.5708	21.4515	181.802
365600	100.68	2.145	8.978		52.529	21.4715	181.741
365801	100.7	2.146	8.979		52.5395	21.4815	181.761
366001	100.62	2.148	8.979		52.4977	21.5015	181.761
366201	100.54	2.148	8.981		52.456	21.5015	181.802
366401	100.82	2.148	8.98		52.6021	21.5015	181.781
366602	100.76	2.15	8.979		52.5708	21.5215	181.761
366804	100.84	2.151	8.979		52.6125	21.5315	181.761
367005	100.8	2.153	8.979		52.5916	21.5516	181.761
367205	100.9	2.153	8.977		52.6438	21.5516	181.721
367405	100.78	2.154	8.981		52.5812	21.5616	181.802
367606	100.98	2.155	8.981		52.6856	21.5716	181.802
367806	101	2.156	8.979		52.696	21.5816	181.761
368007	100.94	2.158	8.978		52.6647	21.6016	181.741
368207	100.94	2.158	8.978		52.6647	21.6016	181.741
368407	100.8	2.158	8.977		52.5916	21.6016	181.721
368608	100.36	2.158	8.978		52.3621	21.6016	181.741
368808	100.96	2.161	8.979		52.6751	21.6316	181.761
369009	101.08	2.162	8.979		52.7377	21.6416	181.761
369209	101	2.162	8.979		52.696	21.6416	181.761
369409	100.9	2.164	8.978		52.6438	21.6617	181.741
369610	100.76	2.165	8.98		52.5708	21.6717	181.781
369810	101.2	2.166	8.979		52.8003	21.6817	181.761
370012	100.8	2.167	8.978		52.5916	21.6917	181.741
370213	101.04	2.168	8.979		52.7169	21.7017	181.761
370413	101.04	2.168	8.979		52.7169	21.7017	181.761
370613	101.16	2.169	8.979		52.7795	21.7117	181.761
370814	100.88	2.171	8.977		52.6334	21.7317	181.721
371014	101	2.172	8.978		52.696	21.7417	181.741
371215	101.04	2.173	8.981		52.7169	21.7518	181.802
371415	101.24	2.173	8.977		52.8212	21.7518	181.721
371615	101.38	2.175	8.981		52.8943	21.7718	181.802
371816	101.22	2.177	8.979		52.8108	21.7918	181.761
372016	101.34	2.177	8.981		52.8734	21.7918	181.802
372217	101.28	2.178	8.979		52.8421	21.8018	181.761
372417	101.44	2.179	8.98		52.9256	21.8118	181.781
372617	101.26	2.18	8.978		52.8316	21.8218	181.741
372818	101.36	2.181	8.979		52.8838	21.8318	181.761
373018	101.36	2.181	8.977		52.8838	21.8318	181.721
373220	101.16	2.182	8.977		52.7795	21.8418	181.721
373421	101.34	2.184	8.978		52.8734	21.8619	181.741
373621	101.3	2.185	8.977		52.8525	21.8719	181.721
373821	101.42	2.185	8.981		52.9151	21.8719	181.802
374022	101.42	2.187	8.981		52.9151	21.8919	181.802
374222	101.26	2.188	8.977		52.8316	21.9019	181.721
374423	101.36	2.19	8.979		52.8838	21.9219	181.761
374623	101.34	2.19	8.978		52.8734	21.9219	181.741
374823	101.46	2.19	8.978		52.936	21.9219	181.741
375024	101.48	2.192	8.981		52.9464	21.9419	181.802
375224	101.32	2.193	8.98		52.863	21.952	181.781
375425	101.6	2.194	8.977		53.009	21.962	181.721
375625	101.52	2.195	8.98		52.9673	21.972	181.781
375825	101.1	2.196	8.979		52.7482	21.982	181.761
376026	101.6	2.197	8.979		53.009	21.992	181.761
376226	101.54	2.198	8.979		52.9777	22.002	181.761
376428	101.56	2.199	8.981		52.9882	22.012	181.802
376629	101.72	2.2	8.978		53.0716	22.022	181.741
376829	101.64	2.201	8.981		53.0299	22.032	181.802
377029	101.58	2.202	8.978		52.9986	22.042	181.741
377230	101.7	2.203	8.979		53.0612	22.0521	181.761
377430	101.68	2.204	8.979		53.0508	22.0621	181.761
377631	101.62	2.205	8.978		53.0195	22.0721	181.741
377831	101.66	2.205	8.979		53.0403	22.0721	181.761
378031	101.52	2.207	8.981		52.9673	22.0921	181.802
378232	101.76	2.209	8.979		53.0925	22.1121	181.761
378432	101.66	2.209	8.976		53.0403	22.1121	181.7
378633	101.84	2.211	8.979		53.1343	22.1321	181.761
378833	101.56	2.212	8.979		52.9882	22.1421	181.761
379033	101.68	2.212	8.979		53.0508	22.1421	181.761
379234	101.76	2.214	8.978		53.0925	22.1622	181.741
379434	101.96	2.214	8.981		53.1969	22.1622	181.802
379636	101.96	2.215	8.979		53.1969	22.1722	181.761
379837	101.58	2.215	8.979		52.9986	22.1722	181.761
380037	101.88	2.217	8.978		53.1551	22.1922	181.741
380237	101.92	2.218	8.977		53.176	22.2022	181.721
380438	101.86	2.218	8.978		53.1447	22.2022	181.741
380638	101.94	2.219	8.979		53.1864	22.2122	181.761
380839	101.58	2.221	8.978		52.9986	22.2322	181.741
381039	101.98	2.222	8.976		53.2073	22.2422	181.7
381239	101.86	2.223	8.982		53.1447	22.2523	181.822
381440	101.96	2.223	8.977		53.1969	22.2523	181.721
381640	101.94	2.224	8.977		53.1864	22.2623	181.721
381841	101.96	2.226	8.98		53.1969	22.2823	181.781
382041	101.54	2.227	8.978		52.9777	22.2923	181.741
382241	101.8	2.228	8.979		53.1134	22.3023	181.761
382442	101.94	2.229	8.98		53.1864	22.3123	181.781
382642	101.96	2.23	8.977		53.1969	22.3223	181.721
382843	102.04	2.231	8.977		53.2386	22.3323	181.721
383043	102.04	2.233	8.977		53.2386	22.3524	181.721
383243	102.16	2.232	8.983		53.3012	22.3423	181.842
383443	102.16	2.233	8.98		53.3012	22.3524	181.781
383644	101.9	2.235	8.979		53.1656	22.3724	181.761
383846	102.14	2.236	8.977		53.2908	22.3824	181.721
384047	102.16	2.237	8.978		53.3012	22.3924	181.741
384247	102.22	2.238	8.977		53.3325	22.4024	181.721
384447	102.22	2.238	8.977		53.3325	22.4024	181.721
384648	102.18	2.24	8.976		53.3116	22.4224	181.7
384848	102.08	2.241	8.979		53.2595	22.4324	181.761
385049	102.12	2.241	8.98		53.2803	22.4324	181.781
385249	102.26	2.244	8.98		53.3534	22.4625	181.781
385449	102.3	2.244	8.977		53.3743	22.4625	181.721
385650	102.6	2.245	8.981		53.5308	22.4725	181.802
385850	102.22	2.246	8.976		53.3325	22.4825	181.7
386051	101.94	2.248	8.979		53.1864	22.5025	181.761
386251	102.4	2.248	8.977		53.4264	22.5025	181.721
386451	102.46	2.25	8.979		53.4577	22.5225	181.761
386651	102.42	2.25	8.98		53.4369	22.5225	181.781
386852	102.44	2.251	8.977		53.4473	22.5325	181.721
387054	102.46	2.252	8.978		53.4577	22.5425	181.741
387255	102.3	2.253	8.98		53.3743	22.5526	181.781
387455	102.58	2.253	8.978		53.5203	22.5526	181.741
387655	102.64	2.255	8.976		53.5517	22.5726	181.7
387856	102.56	2.256	8.981		53.5099	22.5826	181.802
388056	102.6	2.257	8.979		53.5308	22.5926	181.761
388257	102.68	2.258	8.98		53.5725	22.6026	181.781
388457	102.06	2.259	8.975		53.249	22.6126	181.68
388657	102.26	2.26	8.98		53.3534	22.6226	181.781
388858	102.82	2.261	8.978		53.6456	22.6326	181.741
389058	102.46	2.262	8.978		53.4577	22.6426	181.741
389259	102.68	2.263	8.98		53.5725	22.6527	181.781
389459	102.78	2.264	8.977		53.6247	22.6627	181.721
389659	102.82	2.263	8.977		53.6456	22.6527	181.721
389860	102.8	2.265	8.976		53.6351	22.6727	181.7
390060	102.44	2.267	8.977		53.4473	22.6927	181.721
390262	102.56	2.268	8.979		53.5099	22.7027	181.761
390463	102.66	2.269	8.981		53.5621	22.7127	181.802
390663	102.98	2.27	8.98		53.729	22.7227	181.781
390863	102.84	2.271	8.977		53.656	22.7327	181.721
391064	102.92	2.272	8.978		53.6977	22.7427	181.741
391264	102.92	2.274	8.979		53.6977	22.7628	181.761
391465	102.24	2.274	8.98		53.343	22.7628	181.781
391665	102.16	2.275	8.978		53.3012	22.7728	181.741
391865	103.02	2.276	8.977		53.7499	22.7828	181.721
392066	102.84	2.276	8.979		53.656	22.7828	181.761
392266	103.02	2.277	8.977		53.7499	22.7928	181.721
392467	103.02	2.28	8.978		53.7499	22.8228	181.741
392667	103.06	2.28	8.979		53.7708	22.8228	181.761
392867	103	2.281	8.979		53.7395	22.8328	181.761
393068	103.1	2.281	8.98		53.7917	22.8328	181.781
393268	103	2.283	8.976		53.7395	22.8529	181.7
393470	102.88	2.285	8.979		53.6769	22.8729	181.761
393671	103.24	2.285	8.981		53.8647	22.8729	181.802
393871	103.14	2.287	8.979		53.8125	22.8929	181.761
394071	102.8	2.286	8.98		53.6351	22.8829	181.781
394272	102.92	2.288	8.979		53.6977	22.9029	181.761
394472	103.2	2.289	8.979		53.8438	22.9129	181.761
394673	102.96	2.289	8.975		53.7186	22.9129	181.68
394873	102.94	2.29	8.978		53.7082	22.9229	181.741
395073	103.22	2.291	8.977		53.8543	22.9329	181.721
395274	103.06	2.293	8.976		53.7708	22.953	181.7
395474	103.24	2.293	8.98		53.8647	22.953	181.781
395675	102.86	2.295	8.977		53.6664	22.973	181.721
395875	103.1	2.296	8.977		53.7917	22.983	181.721
396075	103.46	2.297	8.974		53.9795	22.993	181.66
396276	103.1	2.298	8.979		53.7917	23.003	181.761
396476	103.46	2.299	8.979		53.9795	23.013	181.761
396678	103.08	2.3	8.976		53.7812	23.023	181.7
396879	103.28	2.3	8.98		53.8856	23.023	181.781
397079	103.42	2.302	8.977		53.9586	23.043	181.721
397279	103.48	2.303	8.978		53.9899	23.0531	181.741
397480	103.38	2.304	8.978		53.9377	23.0631	181.741
397680	103.38	2.306	8.977		53.9377	23.0831	181.721
397881	103.44	2.306	8.977		53.969	23.0831	181.721
[truncated: 818 more rows]

## Sheet: GB-4-12
Force (large)	--	journey	) Results Report
17:21:53,06/23/2019
Diameter: 49.3	mm	Height: 99.9	mm
Vertical force transducer (Test piece vertical force)
Control mode: force/confining pressure	Waveform: Slope
KN/s	Force the finish: 23.900	KN	Confining pressure rate :0.500	MPa/s	End point of confining pressure :12.0000	MPa
Time (ms)	Vertical force (KN)	Vertical deformation (mm)	Confining pressure (MPa)		stress	Axial strain	Lateral strain
0	0	0	0		0	0	0
200	0	0	0		0	0	0
400	0	0	0		0	0	0
600	0.26	-0.001	0		0.136204	-0.01001	0
801	0.42	0.001	0.003		0.220022	0.01001	0.0608519
1003	0.56	0	0.013		0.293362	0	0.263692
1204	0.8	0.001	0.026		0.419089	0.01001	0.527383
1404	0.94	0.003	0.043		0.49243	0.03003	0.872211
1604	1.08	0.01	0.068		0.56577	0.1001	1.37931
1804	1.3	0.018	0.1		0.68102	0.18018	2.0284
2005	1.52	0.026	0.149		0.796269	0.26026	3.02231
2206	1.62	0.037	0.203		0.848655	0.37037	4.11765
2406	1.82	0.054	0.248		0.953427	0.540541	5.03043
2606	2.06	0.075	0.289		1.07915	0.750751	5.86207
2806	2.36	0.095	0.323		1.23631	0.950951	6.55172
3007	2.64	0.115	0.355		1.38299	1.15115	7.20081
3208	2.96	0.133	0.374		1.55063	1.33133	7.58621
3408	3.18	0.147	0.39		1.66588	1.47147	7.91075
3608	3.36	0.159	0.407		1.76017	1.59159	8.25558
3808	3.54	0.169	0.43		1.85447	1.69169	8.72211
4009	3.72	0.178	0.459		1.94876	1.78178	9.31034
4211	3.94	0.189	0.484		2.06401	1.89189	9.81744
4412	4.1	0.198	0.53		2.14783	1.98198	10.7505
4612	4.36	0.207	0.602		2.28404	2.07207	12.211
4812	4.54	0.215	0.719		2.37833	2.15215	14.5842
5012	4.74	0.222	0.937		2.4831	2.22222	19.0061
5213	4.92	0.229	1.415		2.5774	2.29229	28.7018
5414	5.16	0.236	2.163		2.70312	2.36236	43.8742
5614	5.34	0.241	2.497		2.79742	2.41241	50.6491
5814	5.48	0.246	2.647		2.87076	2.46246	53.6917
6014	5.7	0.25	2.986		2.98601	2.5025	60.568
6215	6	0.254	3.092		3.14317	2.54254	62.7181
6416	6.18	0.259	3.163		3.23746	2.59259	64.1582
6616	6.32	0.264	3.262		3.3108	2.64264	66.1663
6816	6.48	0.268	3.365		3.39462	2.68268	68.2556
7016	6.74	0.273	3.467		3.53082	2.73273	70.3245
7217	6.9	0.277	3.564		3.61464	2.77277	72.2921
7419	7.1	0.282	3.666		3.71941	2.82282	74.3611
7620	7.3	0.288	3.766		3.82419	2.88288	76.3895
7820	7.58	0.292	3.866		3.97087	2.92292	78.4178
8020	7.72	0.297	3.967		4.04421	2.97297	80.4665
8220	7.9	0.303	4.069		4.1385	3.03303	82.5355
8421	8.18	0.306	4.168		4.28519	3.06306	84.5436
8622	8.4	0.312	4.268		4.40043	3.12312	86.572
8822	8.56	0.316	4.368		4.48425	3.16316	88.6004
9022	8.68	0.321	4.471		4.54712	3.21321	90.6897
9222	8.98	0.325	4.569		4.70427	3.25325	92.6775
9423	9.14	0.328	4.671		4.78809	3.28328	94.7465
9624	9.36	0.333	4.767		4.90334	3.33333	96.6937
9824	9.58	0.336	4.867		5.01859	3.36336	98.7221
10024	9.74	0.341	4.969		5.10241	3.41341	100.791
10224	9.94	0.343	5.073		5.20718	3.43343	102.901
10425	10.1	0.346	5.172		5.291	3.46346	104.909
10627	10.32	0.351	5.27		5.40625	3.51351	106.897
10828	10.44	0.355	5.372		5.46911	3.55355	108.966
11028	10.76	0.358	5.471		5.63675	3.58358	110.974
11228	10.88	0.362	5.575		5.69961	3.62362	113.083
11428	11.14	0.365	5.673		5.83581	3.65365	115.071
11629	11.34	0.369	5.772		5.94059	3.69369	117.079
11830	11.46	0.373	5.874		6.00345	3.73373	119.148
12030	11.66	0.376	5.958		6.10822	3.76376	120.852
12230	11.94	0.381	6.076		6.2549	3.81381	123.245
12430	12.1	0.384	6.175		6.33872	3.84384	125.254
12631	12.24	0.387	6.269		6.41206	3.87387	127.16
12832	12.5	0.391	6.374		6.54827	3.91391	129.29
13032	12.7	0.396	6.472		6.65304	3.96396	131.278
13232	12.92	0.399	6.574		6.76829	3.99399	133.347
13432	13.08	0.403	6.673		6.85211	4.03403	135.355
13633	13.36	0.407	6.77		6.99879	4.07407	137.323
13835	13.56	0.41	6.873		7.10356	4.1041	139.412
14036	13.76	0.412	6.972		7.20833	4.12412	141.42
14236	13.9	0.417	7.073		7.28167	4.17417	143.469
14436	14.1	0.42	7.176		7.38644	4.2042	145.558
14636	14.34	0.424	7.273		7.51217	4.24424	147.525
14837	14.5	0.426	7.375		7.59599	4.26426	149.594
15038	14.72	0.43	7.476		7.71124	4.3043	151.643
15238	14.9	0.434	7.576		7.80553	4.34434	153.671
15438	15.12	0.437	7.674		7.92078	4.37437	155.659
15638	15.36	0.439	7.772		8.04651	4.39439	157.647
15839	15.52	0.443	7.874		8.13033	4.43443	159.716
16040	15.7	0.447	7.975		8.22462	4.47447	161.765
16240	15.92	0.45	8.077		8.33987	4.5045	163.834
16440	16.08	0.454	8.176		8.42369	4.54454	165.842
16640	16.44	0.457	8.276		8.61228	4.57457	167.87
16841	16.46	0.46	8.376		8.62276	4.6046	169.899
17043	16.78	0.464	8.478		8.79039	4.64464	171.968
17244	16.96	0.465	8.58		8.88469	4.65465	174.037
17444	17.1	0.47	8.679		8.95803	4.7047	176.045
17644	17.36	0.473	8.781		9.09423	4.73473	178.114
17844	17.58	0.475	8.879		9.20948	4.75475	180.101
18045	17.72	0.479	8.979		9.28282	4.79479	182.13
18246	17.94	0.482	9.079		9.39807	4.82482	184.158
18446	18.14	0.486	9.179		9.50284	4.86486	186.187
18646	18.32	0.487	9.281		9.59714	4.87487	188.256
18846	18.56	0.491	9.381		9.72286	4.91491	190.284
19047	18.74	0.494	9.483		9.81716	4.94494	192.353
19248	18.94	0.497	9.58		9.92193	4.97497	194.32
19448	19.2	0.5	9.682		10.0581	5.00501	196.389
19648	19.42	0.504	9.779		10.1734	5.04505	198.357
19848	19.56	0.507	9.878		10.2467	5.07508	200.365
20049	19.68	0.509	9.98		10.3096	5.0951	202.434
20250	19.94	0.512	10.083		10.4458	5.12513	204.523
20450	20.12	0.514	10.182		10.5401	5.14515	206.531
20650	20.32	0.518	10.28		10.6449	5.18519	208.519
20850	20.52	0.521	10.382		10.7496	5.21522	210.588
21051	20.74	0.524	10.482		10.8649	5.24525	212.617
21253	20.98	0.528	10.582		10.9906	5.28529	214.645
21454	21.04	0.53	10.68		11.022	5.30531	216.633
21654	21.34	0.534	10.782		11.1792	5.34535	218.702
21854	21.52	0.536	10.881		11.2735	5.36537	220.71
22054	21.72	0.534	10.982		11.3783	5.34535	222.759
22255	21.88	0.542	11.084		11.4621	5.42543	224.828
22456	22.1	0.545	11.182		11.5773	5.45546	226.815
22656	22.4	0.548	11.283		11.7345	5.48549	228.864
22856	22.5	0.551	11.384		11.7869	5.51552	230.913
23056	22.76	0.554	11.482		11.9231	5.54555	232.901
23257	22.94	0.557	11.582		12.0174	5.57558	234.929
23458	23.1	0.56	11.686		12.1012	5.60561	237.039
23658	23.28	0.564	11.784		12.1955	5.64565	239.026
23858	23.5	0.566	11.884		12.3107	5.66567	241.055
24058	23.82	0.569	11.983		12.4784	5.6957	243.063
24259	23.9	0.571	12		12.5203	5.71572	243.408
控制模式:围压	波形:斜坡					0
MPa/s	终点:11.9930	MPa				#VALUE!
时间(ms)	垂直力(KN)	垂直变形(mm)	围压(MPa)			#VALUE!
24270	23.92	0.572	12		12.5308	5.72573	243.408
24371	24	0.573	11.977		12.5727	5.73574	242.941
24472	24.04	0.574	11.993		12.5936	5.74575	243.266
控制模式:行程	波形:斜坡					0
mm/s	终点:7.9990	mm				#VALUE!
时间(ms)	垂直力(KN)	垂直变形(mm)	围压(MPa)			#VALUE!
24510	23.94	0.574	12		12.5412	5.74575	243.408
24711	23.98	0.572	12.002		12.5622	5.72573	243.448
24911	23.06	0.575	11.998		12.0802	5.75576	243.367
25111	23.22	0.576	11.997		12.1641	5.76577	243.347
25311	23.92	0.576	11.996		12.5308	5.76577	243.327
25513	23.72	0.578	11.995		12.426	5.78579	243.306
25713	23.74	0.579	11.996		12.4365	5.7958	243.327
25913	23.86	0.579	11.997		12.4993	5.7958	243.347
26113	23.86	0.58	11.996		12.4993	5.80581	243.327
26313	24.22	0.582	11.998		12.6879	5.82583	243.367
26513	24.06	0.583	11.998		12.6041	5.83584	243.367
26713	24.2	0.584	11.998		12.6774	5.84585	243.367
26913	24.5	0.585	11.999		12.8346	5.85586	243.387
27113	23.98	0.586	11.995		12.5622	5.86587	243.306
27313	23.96	0.587	11.994		12.5517	5.87588	243.286
27513	23.98	0.588	11.998		12.5622	5.88589	243.367
27713	24.2	0.589	11.997		12.6774	5.8959	243.347
27913	24.62	0.59	11.994		12.8975	5.90591	243.286
28113	24.44	0.591	11.995		12.8032	5.91592	243.306
28313	24.3	0.592	12.001		12.7298	5.92593	243.428
28513	24.6	0.593	11.995		12.887	5.93594	243.306
28713	24.86	0.594	11.997		13.0232	5.94595	243.347
28913	24.52	0.595	12		12.8451	5.95596	243.408
29113	24.62	0.596	11.994		12.8975	5.96597	243.286
29313	24.88	0.596	11.995		13.0337	5.96597	243.306
29513	24.72	0.598	11.996		12.9499	5.98599	243.327
29713	24.96	0.599	11.998		13.0756	5.996	243.367
29913	25.18	0.6	11.996		13.1908	6.00601	243.327
30113	25.36	0.601	11.999		13.2851	6.01602	243.387
30313	25.24	0.602	11.998		13.2223	6.02603	243.367
30513	25.2	0.603	11.999		13.2013	6.03604	243.387
30713	25.34	0.605	11.994		13.2746	6.05606	243.286
30913	25.16	0.604	11.998		13.1803	6.04605	243.367
31113	25.16	0.606	11.996		13.1803	6.06607	243.327
31313	25.76	0.607	11.998		13.4947	6.07608	243.367
31513	25.48	0.608	11.998		13.348	6.08609	243.367
31713	25.88	0.609	11.998		13.5575	6.0961	243.367
31913	25.92	0.61	11.997		13.5785	6.10611	243.347
32113	25.68	0.611	11.996		13.4528	6.11612	243.327
32313	25.56	0.612	11.998		13.3899	6.12613	243.367
32513	25.78	0.612	11.999		13.5051	6.12613	243.387
32713	25.5	0.614	11.998		13.3585	6.14615	243.367
32913	25.82	0.615	11.999		13.5261	6.15616	243.387
33113	26	0.615	11.998		13.6204	6.15616	243.367
33313	25.64	0.616	11.998		13.4318	6.16617	243.367
33513	26.22	0.618	11.996		13.7356	6.18619	243.327
33713	26.5	0.618	11.996		13.8823	6.18619	243.327
33913	26.2	0.62	11.996		13.7252	6.20621	243.327
34113	26.12	0.621	11.996		13.6833	6.21622	243.327
34313	26.58	0.622	11.998		13.9242	6.22623	243.367
34513	26.64	0.623	11.998		13.9557	6.23624	243.367
34713	26.52	0.624	11.998		13.8928	6.24625	243.367
34913	26.46	0.625	11.998		13.8614	6.25626	243.367
35113	26.88	0.626	11.997		14.0814	6.26627	243.347
35313	26.48	0.627	11.997		13.8718	6.27628	243.347
35513	26.44	0.628	11.996		13.8509	6.28629	243.327
35713	26.58	0.629	11.996		13.9242	6.2963	243.327
35913	26.86	0.629	11.996		14.0709	6.2963	243.327
36113	27.14	0.631	11.994		14.2176	6.31632	243.286
36313	26.92	0.632	11.995		14.1023	6.32633	243.306
36513	26.86	0.633	11.998		14.0709	6.33634	243.367
36713	27.36	0.634	11.999		14.3328	6.34635	243.387
36913	27.26	0.635	11.999		14.2805	6.35636	243.387
37113	27.26	0.635	11.999		14.2805	6.35636	243.387
37313	27.46	0.637	12		14.3852	6.37638	243.408
37513	27.54	0.637	11.995		14.4271	6.37638	243.306
37713	27.46	0.639	11.996		14.3852	6.3964	243.327
37913	27.46	0.64	11.997		14.3852	6.40641	243.347
38113	27.44	0.639	11.994		14.3748	6.3964	243.286
38313	27.7	0.642	11.996		14.511	6.42643	243.327
38513	28.02	0.643	11.996		14.6786	6.43644	243.327
38713	27.76	0.644	11.995		14.5424	6.44645	243.306
38913	27.84	0.645	11.996		14.5843	6.45646	243.327
39113	27.86	0.646	11.997		14.5948	6.46647	243.347
39313	28.26	0.647	11.996		14.8043	6.47648	243.327
39513	28.06	0.648	11.995		14.6995	6.48649	243.306
39713	27.76	0.649	11.995		14.5424	6.4965	243.306
39913	28.36	0.65	11.997		14.8567	6.50651	243.347
40113	28.58	0.651	11.999		14.972	6.51652	243.387
40313	28.1	0.653	11.996		14.7205	6.53654	243.327
40513	28.08	0.653	11.998		14.71	6.53654	243.367
40713	28.58	0.654	11.996		14.972	6.54655	243.327
40913	28.72	0.655	11.998		15.0453	6.55656	243.367
41113	28.78	0.655	11.996		15.0767	6.55656	243.327
41313	28.36	0.656	11.996		14.8567	6.56657	243.327
41513	28.94	0.658	11.999		15.1605	6.58659	243.387
41713	28.9	0.659	11.998		15.1396	6.5966	243.367
41913	28.6	0.66	11.997		14.9824	6.60661	243.347
42113	28.86	0.661	11.996		15.1186	6.61662	243.327
42313	28.84	0.662	12		15.1082	6.62663	243.408
42513	29.24	0.663	11.994		15.3177	6.63664	243.286
42713	29.18	0.663	11.996		15.2863	6.63664	243.327
42913	29.24	0.664	11.996		15.3177	6.64665	243.327
43113	29.4	0.666	11.996		15.4015	6.66667	243.327
43313	29.52	0.667	11.994		15.4644	6.67668	243.286
43513	29.32	0.669	11.996		15.3596	6.6967	243.327
43713	29.22	0.669	11.996		15.3072	6.6967	243.327
43913	29.7	0.67	11.996		15.5587	6.70671	243.327
44113	29.54	0.671	11.998		15.4749	6.71672	243.367
44313	29.6	0.673	11.994		15.5063	6.73674	243.286
44513	29.64	0.673	11.996		15.5272	6.73674	243.327
44713	29.84	0.674	11.995		15.632	6.74675	243.306
44913	29.9	0.675	11.995		15.6635	6.75676	243.306
45113	29.62	0.675	11.994		15.5168	6.75676	243.286
45313	29.9	0.677	11.994		15.6635	6.77678	243.286
45513	29.68	0.678	11.996		15.5482	6.78679	243.327
45713	29.98	0.679	11.997		15.7054	6.7968	243.347
45913	30.16	0.68	11.996		15.7997	6.80681	243.327
46113	29.96	0.681	11.997		15.6949	6.81682	243.347
46313	30.3	0.682	11.994		15.873	6.82683	243.286
46513	30.54	0.682	11.997		15.9987	6.82683	243.347
46713	30.34	0.684	11.995		15.894	6.84685	243.306
46913	30.38	0.684	11.996		15.9149	6.84685	243.327
47113	30.22	0.687	11.997		15.8311	6.87688	243.347
47313	30.58	0.686	11.998		16.0197	6.86687	243.367
47513	30.36	0.688	11.998		15.9044	6.88689	243.367
47713	30.58	0.688	11.998		16.0197	6.88689	243.367
47913	30.92	0.689	11.996		16.1978	6.8969	243.327
48113	31	0.691	11.996		16.2397	6.91692	243.327
48313	30.76	0.691	11.997		16.114	6.91692	243.347
48513	30.9	0.693	11.997		16.1873	6.93694	243.347
48713	31.04	0.694	11.996		16.2607	6.94695	243.327
48913	31.22	0.695	11.998		16.3549	6.95696	243.367
49113	31.26	0.696	11.995		16.3759	6.96697	243.306
49313	31.22	0.696	11.996		16.3549	6.96697	243.327
49513	31.5	0.698	11.998		16.5016	6.98699	243.367
49713	31.34	0.7	11.998		16.4178	7.00701	243.367
49913	31.12	0.7	11.995		16.3026	7.00701	243.306
50113	31.58	0.701	11.997		16.5435	7.01702	243.347
50313	31.62	0.703	11.997		16.5645	7.03704	243.347
50513	31.74	0.703	11.996		16.6274	7.03704	243.327
50713	31.76	0.704	11.996		16.6378	7.04705	243.327
50913	31.92	0.705	11.994		16.7217	7.05706	243.286
51113	31.72	0.706	11.997		16.6169	7.06707	243.347
51313	32.14	0.707	11.999		16.8369	7.07708	243.387
51513	31.94	0.708	11.996		16.7321	7.08709	243.327
51713	31.76	0.709	11.997		16.6378	7.0971	243.347
51913	32.1	0.711	11.996		16.8159	7.11712	243.327
52113	32.46	0.711	11.995		17.0045	7.11712	243.306
52313	32.4	0.712	11.999		16.9731	7.12713	243.387
52513	32.32	0.712	11.993		16.9312	7.12713	243.266
52713	32.4	0.714	11.996		16.9731	7.14715	243.327
52913	32.44	0.715	11.997		16.9941	7.15716	243.347
53113	32.08	0.716	11.995		16.8055	7.16717	243.306
53313	32.22	0.717	11.998		16.8788	7.17718	243.367
53513	32.58	0.718	11.996		17.0674	7.18719	243.327
53713	32.72	0.719	11.998		17.1407	7.1972	243.367
53913	32.64	0.72	11.995		17.0988	7.20721	243.306
54113	32.74	0.721	11.994		17.1512	7.21722	243.286
54313	32.92	0.723	11.996		17.2455	7.23724	243.327
54513	33.02	0.722	11.996		17.2979	7.22723	243.327
54713	32.64	0.723	11.999		17.0988	7.23724	243.387
54913	33.06	0.726	11.995		17.3189	7.26727	243.306
55113	33.14	0.726	11.994		17.3608	7.26727	243.286
55313	33	0.727	11.996		17.2874	7.27728	243.327
55513	33.36	0.728	11.997		17.476	7.28729	243.347
55713	33.12	0.73	11.997		17.3503	7.30731	243.347
55913	33.34	0.73	11.999		17.4655	7.30731	243.387
56113	33.36	0.731	11.996		17.476	7.31732	243.327
56313	33.68	0.731	11.998		17.6436	7.31732	243.367
56513	33.68	0.731	11.998		17.6436	7.31732	243.367
56713	33.6	0.735	11.994		17.6017	7.35736	243.286
56913	33.76	0.735	11.998		17.6856	7.35736	243.367
57113	33.34	0.736	11.996		17.4655	7.36737	243.327
57313	33.76	0.737	11.997		17.6856	7.37738	243.347
57513	34.02	0.739	11.998		17.8218	7.3974	243.367
57713	34.02	0.739	11.995		17.8218	7.3974	243.306
57913	33.92	0.74	11.994		17.7694	7.40741	243.286
58113	33.9	0.742	11.997		17.7589	7.42743	243.347
58313	34.04	0.742	11.998		17.8322	7.42743	243.367
58513	34	0.743	11.998		17.8113	7.43744	243.367
58713	34.2	0.744	11.996		17.9161	7.44745	243.327
58913	34.38	0.744	11.998		18.0103	7.44745	243.367
59113	34.46	0.746	11.998		18.0523	7.46747	243.367
59313	34.42	0.747	11.997		18.0313	7.47748	243.347
59513	34.08	0.747	11.995		17.8532	7.47748	243.306
59713	34.46	0.75	11.997		18.0523	7.50751	243.347
59913	34.68	0.75	12		18.1675	7.50751	243.408
60113	34.58	0.751	11.996		18.1151	7.51752	243.327
60313	34.68	0.753	11.998		18.1675	7.53754	243.367
60513	34.66	0.753	11.998		18.157	7.53754	243.367
60713	34.58	0.754	11.997		18.1151	7.54755	243.347
60913	34.72	0.755	11.995		18.1885	7.55756	243.306
61113	34.94	0.756	11.994		18.3037	7.56757	243.286
61313	34.52	0.756	11.996		18.0837	7.56757	243.327
61513	34.8	0.759	11.999		18.2304	7.5976	243.387
61713	35.22	0.758	11.996		18.4504	7.58759	243.327
61913	35.08	0.76	11.997		18.3771	7.60761	243.347
62113	35.36	0.76	11.996		18.5237	7.60761	243.327
62313	35.38	0.762	11.999		18.5342	7.62763	243.387
62513	35.18	0.763	11.996		18.4294	7.63764	243.327
62713	35.4	0.765	11.993		18.5447	7.65766	243.266
62913	35.36	0.765	11.996		18.5237	7.65766	243.327
63113	35.5	0.765	11.996		18.5971	7.65766	243.327
63313	35.54	0.767	11.994		18.618	7.67768	243.286
63513	35.6	0.768	11.999		18.6495	7.68769	243.387
63713	35.54	0.769	11.996		18.618	7.6977	243.327
63913	35.9	0.77	11.997		18.8066	7.70771	243.347
64113	35.98	0.772	11.993		18.8485	7.72773	243.266
64313	36.02	0.773	12.001		18.8695	7.73774	243.428
64513	35.78	0.773	11.996		18.7438	7.73774	243.327
64713	36.08	0.774	11.998		18.9009	7.74775	243.367
64913	35.96	0.774	11.999		18.8381	7.74775	243.387
65113	36.24	0.776	11.997		18.9847	7.76777	243.347
65313	36.28	0.777	11.997		19.0057	7.77778	243.347
65513	36.42	0.778	11.998		19.079	7.78779	243.367
65713	36.36	0.778	11.997		19.0476	7.78779	243.347
65913	35.94	0.78	11.996		18.8276	7.80781	243.327
66113	36.68	0.781	11.996		19.2152	7.81782	243.327
66313	36.44	0.782	11.998		19.0895	7.82783	243.367
66513	36.76	0.783	11.995		19.2571	7.83784	243.306
66713	36.9	0.784	11.999		19.3305	7.84785	243.387
66913	36.78	0.785	11.996		19.2676	7.85786	243.327
67113	36.76	0.786	11.997		19.2571	7.86787	243.347
67313	36.98	0.787	11.996		19.3724	7.87788	243.327
67513	36.68	0.787	11.998		19.2152	7.87788	243.367
67713	36.7	0.789	11.995		19.2257	7.8979	243.306
67913	37.12	0.79	11.996		19.4457	7.90791	243.327
68113	37.08	0.791	11.996		19.4248	7.91792	243.327
68313	37.24	0.792	11.997		19.5086	7.92793	243.347
68513	37.24	0.793	11.996		19.5086	7.93794	243.327
68713	37.38	0.794	11.997		19.5819	7.94795	243.347
68913	37.36	0.795	11.997		19.5715	7.95796	243.347
69113	37.34	0.796	11.997		19.561	7.96797	243.347
69313	37.38	0.797	11.999		19.5819	7.97798	243.387
69513	37.46	0.798	11.997		19.6238	7.98799	243.347
69713	37.62	0.8	11.994		19.7077	8.00801	243.286
69913	37.52	0.8	11.995		19.6553	8.00801	243.306
70113	37.7	0.8	11.995		19.7496	8.00801	243.306
70313	37.84	0.802	11.996		19.8229	8.02803	243.327
70513	37.9	0.803	11.994		19.8543	8.03804	243.286
70713	37.74	0.804	11.995		19.7705	8.04805	243.306
70913	38	0.805	11.998		19.9067	8.05806	243.367
71113	37.88	0.807	11.996		19.8439	8.07808	243.327
71313	38	0.807	11.996		19.9067	8.07808	243.327
71513	38.1	0.808	11.996		19.9591	8.08809	243.327
71713	38.22	0.809	11.996		20.022	8.0981	243.327
71913	38.18	0.81	11.997		20.001	8.10811	243.347
72113	38.48	0.811	11.997		20.1582	8.11812	243.347
72313	38.14	0.812	11.995		19.9801	8.12813	243.306
72513	38.28	0.813	11.997		20.0534	8.13814	243.347
72713	38.1	0.814	11.995		19.9591	8.14815	243.306
72913	38.36	0.815	11.995		20.0953	8.15816	243.306
73113	38.52	0.816	11.994		20.1791	8.16817	243.286
73313	38.6	0.817	11.999		20.221	8.17818	243.387
73513	38.84	0.818	11.997		20.3468	8.18819	243.347
73713	38.82	0.818	11.996		20.3363	8.18819	243.327
73913	38.72	0.82	11.996		20.2839	8.20821	243.327
74113	38.7	0.821	11.994		20.2734	8.21822	243.286
74313	39.02	0.822	11.999		20.4411	8.22823	243.387
74513	39.18	0.823	11.997		20.5249	8.23824	243.347
74713	39.18	0.824	12		20.5249	8.24825	243.408
74913	39.06	0.825	11.996		20.462	8.25826	243.327
75113	39.24	0.826	11.997		20.5563	8.26827	243.347
75313	39.32	0.827	11.998		20.5982	8.27828	243.367
75513	39.14	0.826	11.997		20.5039	8.26827	243.347
75713	39.42	0.829	11.996		20.6506	8.2983	243.327
75913	39.6	0.83	11.998		20.7449	8.30831	243.367
76113	39.7	0.831	11.997		20.7973	8.31832	243.347
76313	39.42	0.832	11.996		20.6506	8.32833	243.327
76513	39.72	0.833	11.997		20.8078	8.33834	243.347
76713	39.86	0.835	11.998		20.8811	8.35836	243.367
76913	39.86	0.835	11.997		20.8811	8.35836	243.347
77113	39.88	0.836	11.996		20.8916	8.36837	243.327
77313	39.9	0.837	11.996		20.9021	8.37838	243.327
77513	40	0.838	11.998		20.9545	8.38839	243.367
77713	39.8	0.839	11.997		20.8497	8.3984	243.347
77913	40.28	0.84	11.996		21.1011	8.40841	243.327
78113	40.04	0.842	11.998		20.9754	8.42843	243.367
78313	40.38	0.842	11.998		21.1535	8.42843	243.367
78513	40.3	0.843	11.996		21.1116	8.43844	243.327
78713	40.22	0.843	11.996		21.0697	8.43844	243.327
78913	40.36	0.845	11.995		21.143	8.45846	243.306
79113	40.48	0.846	11.997		21.2059	8.46847	243.347
79313	40.7	0.846	11.994		21.3212	8.46847	243.286
79513	40.56	0.849	11.998		21.2478	8.4985	243.367
79713	40.74	0.849	11.995		21.3421	8.4985	243.306
79913	40.9	0.849	11.998		21.4259	8.4985	243.367
80113	40.96	0.851	11.997		21.4574	8.51852	243.347
80313	40.62	0.851	11.996		21.2792	8.51852	243.327
80513	40.68	0.853	11.996		21.3107	8.53854	243.327
80713	41.06	0.854	11.997		21.5097	8.54855	243.347
80913	41.2	0.855	11.996		21.5831	8.55856	243.327
81113	41.08	0.857	11.998		21.5202	8.57858	243.367
81313	41.22	0.857	11.994		21.5936	8.57858	243.286
81513	41.22	0.858	11.995		21.5936	8.58859	243.306
81713	41.5	0.859	11.998		21.7402	8.5986	243.367
81913	41.52	0.86	11.998		21.7507	8.60861	243.367
82113	41.64	0.862	11.992		21.8136	8.62863	243.245
82313	41.72	0.862	12		21.8555	8.62863	243.408
82513	41.58	0.863	11.996		21.7822	8.63864	243.327
82713	41.68	0.864	11.997		21.8345	8.64865	243.347
82913	41.6	0.864	11.997		21.7926	8.64865	243.347
83113	41.8	0.866	11.999		21.8974	8.66867	243.387
83313	41.88	0.867	11.997		21.9393	8.67868	243.347
83513	41.92	0.868	11.998		21.9603	8.68869	243.367
83713	41.9	0.87	11.996		21.9498	8.70871	243.327
83913	41.9	0.87	11.997		21.9498	8.70871	243.347
84113	42.14	0.871	11.996		22.0755	8.71872	243.327
84313	42.26	0.872	11.994		22.1384	8.72873	243.286
84513	42.4	0.873	11.997		22.2117	8.73874	243.347
84713	42.28	0.875	12		22.1489	8.75876	243.408
84913	42.4	0.875	11.996		22.2117	8.75876	243.327
85113	42.28	0.875	11.998		22.1489	8.75876	243.367
85313	42.24	0.876	11.997		22.1279	8.76877	243.347
85513	42.64	0.878	11.996		22.3374	8.78879	243.327
85713	42.72	0.879	11.997		22.3794	8.7988	243.347
85913	42.66	0.879	11.997		22.3479	8.7988	243.347
86113	42.92	0.881	11.996		22.4841	8.81882	243.327
86313	42.88	0.882	11.996		22.4632	8.82883	243.327
86513	42.9	0.883	11.998		22.4736	8.83884	243.367
86713	42.86	0.884	11.997		22.4527	8.84885	243.347
86913	43.06	0.885	11.996		22.5575	8.85886	243.327
87113	42.94	0.887	11.998		22.4946	8.87888	243.367
87313	43.1	0.887	11.997		22.5784	8.87888	243.347
87513	43.2	0.888	11.998		22.6308	8.88889	243.367
87713	43.28	0.889	11.994		22.6727	8.8989	243.286
87913	43.32	0.89	11.999		22.6937	8.90891	243.387
88113	43.1	0.891	11.996		22.5784	8.91892	243.327
88313	43.22	0.893	11.999		22.6413	8.93894	243.387
88513	43.58	0.893	11.997		22.8299	8.93894	243.347
88713	43.8	0.894	11.994		22.9451	8.94895	243.286
88913	43.72	0.895	11.998		22.9032	8.95896	243.367
89113	43.48	0.896	11.997		22.7775	8.96897	243.347
89313	43.76	0.896	11.996		22.9242	8.96897	243.327
89513	43.94	0.899	11.996		23.0185	8.999	243.327
89713	43.86	0.898	11.995		22.9766	8.98899	243.306
89913	43.9	0.9	11.998		22.9975	9.00901	243.367
90113	44	0.902	11.997		23.0499	9.02903	243.347
90313	44	0.902	11.997		23.0499	9.02903	243.347
90513	44.22	0.903	11.997		23.1651	9.03904	243.347
90713	44.22	0.905	11.995		23.1651	9.05906	243.306
90913	44.22	0.906	11.996		23.1651	9.06907	243.327
91113	44.4	0.906	11.996		23.2594	9.06907	243.327
91313	44.5	0.906	11.998		23.3118	9.06907	243.367
91513	43.98	0.908	11.995		23.0394	9.08909	243.306
91713	44.44	0.909	11.996		23.2804	9.0991	243.327
91913	44.4	0.911	11.994		23.2594	9.11912	243.286
92113	44.72	0.91	11.998		23.4271	9.10911	243.367
92313	44.64	0.912	11.997		23.3852	9.12913	243.347
92513	44.74	0.913	12		23.4376	9.13914	243.408
92713	44.92	0.914	11.998		23.5318	9.14915	243.367
92913	44.88	0.914	11.999		23.5109	9.14915	243.387
93113	44.86	0.916	11.996		23.5004	9.16917	243.327
93313	44.84	0.917	11.998		23.4899	9.17918	243.367
93513	45	0.917	11.997		23.5738	9.17918	243.347
93713	45.08	0.918	11.995		23.6157	9.18919	243.306
93913	45.08	0.92	11.998		23.6157	9.20921	243.367
94113	45.14	0.921	11.997		23.6471	9.21922	243.347
94313	45.36	0.923	11.997		23.7623	9.23924	243.347
94513	45.4	0.923	11.998		23.7833	9.23924	243.367
94713	45.46	0.925	11.997		23.8147	9.25926	243.347
94913	45.56	0.924	11.997		23.8671	9.24925	243.347
95113	45.66	0.926	11.996		23.9195	9.26927	243.327
95313	45.7	0.927	11.995		23.9405	9.27928	243.306
95513	45.78	0.928	11.996		23.9824	9.28929	243.327
95713	45.54	0.928	11.996		23.8566	9.28929	243.327
95913	45.84	0.93	11.996		24.0138	9.30931	243.327
96113	45.94	0.931	11.999		24.0662	9.31932	243.387
96313	45.94	0.931	11.998		24.0662	9.31932	243.367
96513	45.94	0.932	11.995		24.0662	9.32933	243.306
96713	45.96	0.934	11.998		24.0767	9.34935	243.367
96913	46.12	0.935	11.995		24.1605	9.35936	243.306
97113	46.2	0.936	12		24.2024	9.36937	243.408
97313	46.04	0.937	11.997		24.1186	9.37938	243.347
97513	46.16	0.938	11.998		24.1814	9.38939	243.367
97713	46.34	0.938	11.996		24.2757	9.38939	243.327
97913	46.18	0.939	11.999		24.1919	9.3994	243.387
98113	46.52	0.941	11.995		24.37	9.41942	243.306
98313	46.5	0.942	11.994		24.3595	9.42943	243.286
98513	46.46	0.943	11.996		24.3386	9.43944	243.327
98713	46.66	0.944	11.997		24.4434	9.44945	243.347
98913	46.6	0.946	11.996		24.4119	9.46947	243.327
99113	46.78	0.946	11.996		24.5062	9.46947	243.327
99313	46.9	0.946	11.996		24.5691	9.46947	243.327
99513	46.88	0.948	11.995		24.5586	9.48949	243.306
99713	46.98	0.948	11.998		24.611	9.48949	243.367
99913	46.92	0.95	11.994		24.5796	9.50951	243.286
100113	46.94	0.951	11.996		24.59	9.51952	243.327
100313	47.16	0.952	11.997		24.7053	9.52953	243.347
100513	47.04	0.953	11.994		24.6424	9.53954	243.286
100713	47.18	0.953	11.996		24.7158	9.53954	243.327
100913	47.18	0.955	11.998		24.7158	9.55956	243.367
101113	47.12	0.956	11.994		24.6843	9.56957	243.286
101313	47.28	0.957	11.996		24.7682	9.57958	243.327
101513	47.38	0.958	12		24.8205	9.58959	243.408
101713	47.5	0.958	11.995		24.8834	9.58959	243.306
101913	47.46	0.96	11.995		24.8625	9.60961	243.306
102113	47.52	0.961	11.995		24.8939	9.61962	243.306
102313	47.72	0.962	11.995		24.9987	9.62963	243.306
102513	47.68	0.963	11.997		24.9777	9.63964	243.347
102713	47.56	0.964	11.997		24.9148	9.64965	243.347
102913	47.7	0.965	11.997		24.9882	9.65966	243.347
103113	47.78	0.967	11.994		25.0301	9.67968	243.286
103313	47.88	0.967	11.994		25.0825	9.67968	243.286
103513	48	0.968	11.998		25.1453	9.68969	243.367
103713	48.18	0.969	11.996		25.2396	9.6997	243.327
103913	48.12	0.969	11.998		25.2082	9.6997	243.367
104113	48.1	0.97	11.997		25.1977	9.70971	243.347
104313	48.2	0.972	11.998		25.2501	9.72973	243.367
104513	48.22	0.973	11.996		25.2606	9.73974	243.327
104713	48.36	0.974	11.996		25.3339	9.74975	243.327
104913	48.44	0.975	11.997		25.3758	9.75976	243.347
105113	48.44	0.976	11.994		25.3758	9.76977	243.286
105313	48.18	0.978	11.994		25.2396	9.78979	243.286
105513	48.5	0.978	11.997		25.4073	9.78979	243.347
105713	48.52	0.979	11.994		25.4177	9.7998	243.286
105913	48.54	0.981	11.997		25.4282	9.81982	243.347
106113	48.76	0.981	11.996		25.5435	9.81982	243.327
106313	48.78	0.982	12		25.554	9.82983	243.408
106513	48.94	0.982	11.994		25.6378	9.82983	243.286
106713	49.06	0.983	11.998		25.7006	9.83984	243.367
106913	49.08	0.985	11.997		25.7111	9.85986	243.347
107113	49.18	0.986	11.998		25.7635	9.86987	243.367
107313	49.24	0.987	11.998		25.7949	9.87988	243.367
107513	49.22	0.989	11.997		25.7845	9.8999	243.347
107713	49.3	0.99	11.995		25.8264	9.90991	243.306
107913	49.08	0.99	11.997		25.7111	9.90991	243.347
108113	49.46	0.991	11.999		25.9102	9.91992	243.387
108313	49.5	0.991	11.996		25.9311	9.91992	243.327
108513	49.46	0.993	11.994		25.9102	9.93994	243.286
108713	49.54	0.994	11.998		25.9521	9.94995	243.367
108913	49.78	0.994	11.995		26.0778	9.94995	243.306
109113	49.84	0.995	11.994		26.1092	9.95996	243.286
109313	49.88	0.998	11.995		26.1302	9.98999	243.306
109513	49.36	0.998	11.995		25.8578	9.98999	243.306
109713	49.66	0.999	11.999		26.0149	10	243.387
109913	49.9	1	11.998		26.1407	10.01	243.367
110113	49.9	1	11.998		26.1407	10.01	243.367
110313	50	1.002	11.995		26.1931	10.03	243.306
110513	50.04	1.003	11.997		26.214	10.04	243.347
110713	50.1	1.003	11.995		26.2454	10.04	243.306
110913	50.16	1.005	11.998		26.2769	10.0601	243.367
111113	50.18	1.006	11.998		26.2874	10.0701	243.367
111313	50.34	1.007	11.998		26.3712	10.0801	243.367
111513	50.52	1.007	11.999		26.4655	10.0801	243.387
111713	50.52	1.008	11.996		26.4655	10.0901	243.327
111913	50.5	1.01	11.996		26.455	10.1101	243.327
112113	50.52	1.01	11.998		26.4655	10.1101	243.367
112313	50.6	1.013	11.997		26.5074	10.1401	243.347
112513	50.7	1.013	11.996		26.5598	10.1401	243.327
112713	50.48	1.013	11.998		26.4445	10.1401	243.367
112913	50.86	1.015	11.998		26.6436	10.1602	243.367
113113	50.88	1.016	11.998		26.6541	10.1702	243.367
113313	51.02	1.017	11.999		26.7274	10.1802	243.387
113513	51.04	1.018	11.997		26.7379	10.1902	243.347
113713	51.06	1.018	11.997		26.7484	10.1902	243.347
113913	51.16	1.02	11.999		26.8007	10.2102	243.387
114113	51	1.022	11.997		26.7169	10.2302	243.347
114313	50.88	1.022	11.994		26.6541	10.2302	243.286
114513	51.34	1.023	11.999		26.895	10.2402	243.387
114713	51.3	1.024	11.997		26.8741	10.2503	243.347
114913	51.5	1.024	11.996		26.9789	10.2503	243.327
115113	51.32	1.026	11.998		26.8846	10.2703	243.367
115313	51.64	1.027	11.995		27.0522	10.2803	243.306
115513	51.66	1.027	11.996		27.0627	10.2803	243.327
115713	51.64	1.029	11.995		27.0522	10.3003	243.306
115913	51.78	1.03	11.997		27.1255	10.3103	243.347
116113	51.76	1.031	11.998		27.1151	10.3203	243.367
116313	51.86	1.032	11.994		27.1674	10.3303	243.286
116513	51.9	1.032	12.002		27.1884	10.3303	243.448
116713	52.08	1.034	11.996		27.2827	10.3504	243.327
116913	52	1.034	11.996		27.2408	10.3504	243.327
117113	52.12	1.036	11.999		27.3036	10.3704	243.387
117313	52.18	1.036	11.998		27.3351	10.3704	243.367
117513	52.24	1.037	11.998		27.3665	10.3804	243.367
117713	52.28	1.04	11.996		27.3875	10.4104	243.327
117913	52.38	1.039	11.998		27.4399	10.4004	243.367
118113	52.52	1.041	11.997		27.5132	10.4204	243.347
118313	52.54	1.042	12		27.5237	10.4304	243.408
118513	52.5	1.043	11.999		27.5027	10.4404	243.387
118713	52.5	1.044	11.997		27.5027	10.4505	243.347
118913	52.34	1.044	11.999		27.4189	10.4505	243.387
119113	52.5	1.047	11.998		27.5027	10.4805	243.367
119313	52.76	1.047	11.998		27.6389	10.4805	243.367
119513	52.8	1.047	11.998		27.6599	10.4805	243.367
119713	52.9	1.049	11.994		27.7123	10.5005	243.286
119913	52.8	1.05	11.998		27.6599	10.5105	243.367
120113	53.02	1.051	11.996		27.7751	10.5205	243.327
120313	53.14	1.051	11.996		27.838	10.5205	243.327
120513	53.28	1.052	11.997		27.9113	10.5305	243.347
120713	52.94	1.055	11.996		27.7332	10.5606	243.327
120913	53.1	1.055	11.998		27.817	10.5606	243.367
121113	53.28	1.055	11.999		27.9113	10.5606	243.387
121313	53.36	1.057	11.997		27.9532	10.5806	243.347
121513	53.28	1.058	11.995		27.9113	10.5906	243.306
121713	53.46	1.058	11.998		28.0056	10.5906	243.367
121913	53.66	1.06	11.996		28.1104	10.6106	243.327
122113	53.66	1.061	11.996		28.1104	10.6206	243.327
122313	53.64	1.062	11.995		28.0999	10.6306	243.306
122513	53.46	1.064	11.998		28.0056	10.6507	243.367
122713	53.72	1.064	11.997		28.1418	10.6507	243.347
122913	53.76	1.064	11.998		28.1628	10.6507	243.367
123113	53.92	1.065	11.995		28.2466	10.6607	243.306
123313	54.04	1.067	11.998		28.3095	10.6807	243.367
123513	54.02	1.068	11.997		28.299	10.6907	243.347
123713	54.1	1.069	12.001		28.3409	10.7007	243.428
123913	54.08	1.071	11.996		28.3304	10.7207	243.327
124113	54.1	1.071	11.995		28.3409	10.7207	243.306
124313	54.14	1.072	12		28.3618	10.7307	243.408
124513	54.34	1.072	11.999		28.4666	10.7307	243.387
124713	54.2	1.074	11.995		28.3933	10.7508	243.306
124913	54.32	1.075	11.997		28.4561	10.7608	243.347
125113	54.42	1.075	11.998		28.5085	10.7608	243.367
125313	54.44	1.076	11.998		28.519	10.7708	243.367
125513	54.56	1.078	11.998		28.5819	10.7908	243.367
125713	54.5	1.08	11.996		28.5504	10.8108	243.327
125913	54.56	1.08	11.998		28.5819	10.8108	243.367
126113	54.56	1.081	11.996		28.5819	10.8208	243.327
126313	54.64	1.082	11.998		28.6238	10.8308	243.367
126513	54.74	1.083	11.997		28.6762	10.8408	243.347
126713	54.82	1.083	11.996		28.7181	10.8408	243.327
126913	54.58	1.084	11.996		28.5923	10.8509	243.327
127113	54.76	1.086	11.999		28.6866	10.8709	243.387
127313	55	1.086	11.997		28.8124	10.8709	243.347
127513	55.1	1.088	11.998		28.8648	10.8909	243.367
127713	55.14	1.088	11.994		28.8857	10.8909	243.286
127913	55.26	1.089	11.997		28.9486	10.9009	243.347
128113	55.2	1.09	11.996		28.9171	10.9109	243.327
128313	55.42	1.092	11.996		29.0324	10.9309	243.327
128513	55.5	1.092	11.997		29.0743	10.9309	243.347
128713	55.44	1.094	11.996		29.0429	10.951	243.327
128913	55.52	1.095	11.997		29.0848	10.961	243.347
129113	55.54	1.096	11.998		29.0953	10.971	243.367
129313	55.7	1.097	12		29.1791	10.981	243.408
129513	55.78	1.097	11.998		29.221	10.981	243.367
129713	55.64	1.098	11.994		29.1476	10.991	243.286
129913	55.88	1.1	11.995		29.2734	11.011	243.306
130113	55.76	1.101	11.995		29.2105	11.021	243.306
130313	55.8	1.102	11.994		29.2315	11.031	243.286
130513	55.88	1.102	11.996		29.2734	11.031	243.327
130713	55.9	1.103	11.996		29.2838	11.041	243.327
130913	56.18	1.104	11.994		29.4305	11.0511	243.286
131113	56.16	1.105	11.996		29.42	11.0611	243.327
131313	56.12	1.107	11.995		29.3991	11.0811	243.306
131513	56.26	1.108	11.996		29.4724	11.0911	243.327
131713	56.16	1.11	11.997		29.42	11.1111	243.347
131913	56.28	1.11	11.994		29.4829	11.1111	243.286
132113	56.52	1.111	11.999		29.6086	11.1211	243.387
132313	56.48	1.112	11.997		29.5877	11.1311	243.347
132513	56.66	1.113	11.997		29.682	11.1411	243.347
132713	56.62	1.113	11.998		29.661	11.1411	243.367
132913	56.72	1.113	11.998		29.7134	11.1411	243.367
133113	56.68	1.115	11.998		29.6925	11.1612	243.367
133313	56.9	1.117	11.999		29.8077	11.1812	243.387
133513	56.82	1.118	11.997		29.7658	11.1912	243.347
133713	56.94	1.118	11.996		29.8287	11.1912	243.327
133913	57	1.119	11.995		29.8601	11.2012	243.306
134113	57.1	1.12	11.997		29.9125	11.2112	243.347
134313	56.94	1.122	11.997		29.8287	11.2312	243.347
134513	57.12	1.123	11.997		29.923	11.2412	243.347
134713	57.16	1.124	11.998		29.9439	11.2513	243.367
134913	57.2	1.124	11.996		29.9649	11.2513	243.327
135113	57.24	1.125	11.996		29.9858	11.2613	243.327
135313	57.14	1.127	11.998		29.9334	11.2813	243.367
135513	57.36	1.128	11.997		30.0487	11.2913	243.347
135713	57.36	1.128	11.994		30.0487	11.2913	243.286
135913	57.44	1.129	11.999		30.0906	11.3013	243.387
136113	57.58	1.131	11.997		30.1639	11.3213	243.347
136313	57.5	1.131	11.994		30.122	11.3213	243.286
136513	57.62	1.132	11.996		30.1849	11.3313	243.327
136713	57.6	1.133	12		30.1744	11.3413	243.408
136913	57.82	1.135	11.994		30.2897	11.3614	243.286
137113	57.78	1.135	11.998		30.2687	11.3614	243.367
137313	57.9	1.137	11.998		30.3316	11.3814	243.367
137513	58.04	1.138	11.998		30.4049	11.3914	243.367
137713	57.92	1.137	11.995		30.342	11.3814	243.306
137913	57.98	1.14	11.997		30.3735	11.4114	243.347
138113	58.26	1.14	11.997		30.5202	11.4114	243.347
138313	58.14	1.141	11.996		30.4573	11.4214	243.327
138513	58.22	1.142	11.996		30.4992	11.4314	243.327
138713	58.36	1.143	11.999		30.5725	11.4414	243.387
138913	58.3	1.144	11.994		30.5411	11.4515	243.286
139113	58.4	1.145	11.998		30.5935	11.4615	243.367
139313	58.34	1.147	11.996		30.5621	11.4815	243.327
139513	58.46	1.148	12		30.6249	11.4915	243.408
139713	58.58	1.149	11.998		30.6878	11.5015	243.367
139913	58.4	1.15	11.999		30.5935	11.5115	243.387
140113	58.6	1.15	11.998		30.6983	11.5115	243.367
140313	58.62	1.151	11.996		30.7087	11.5215	243.327
140513	58.8	1.153	12		30.803	11.5415	243.408
140713	58.94	1.153	11.997		30.8764	11.5415	243.347
140913	58.96	1.154	11.998		30.8869	11.5516	243.367
141113	58.92	1.156	12		30.8659	11.5716	243.408
141313	59	1.156	11.995		30.9078	11.5716	243.306
141513	58.8	1.158	11.994		30.803	11.5916	243.286
141713	59.1	1.159	11.998		30.9602	11.6016	243.367
141913	59.2	1.16	11.996		31.0126	11.6116	243.327
142113	59.2	1.161	11.995		31.0126	11.6216	243.306
142313	59.34	1.162	11.997		31.0859	11.6316	243.347
142513	59.34	1.163	11.995		31.0859	11.6416	243.306
142713	59.4	1.163	11.998		31.1174	11.6416	243.367
142913	59.48	1.165	11.999		31.1593	11.6617	243.387
143113	59.56	1.166	11.998		31.2012	11.6717	243.367
143313	59.64	1.167	11.996		31.2431	11.6817	243.327
143513	59.5	1.167	11.997		31.1697	11.6817	243.347
143713	59.62	1.168	11.996		31.2326	11.6917	243.327
143913	59.64	1.169	11.997		31.2431	11.7017	243.347
144113	59.68	1.17	11.996		31.264	11.7117	243.327
144313	59.74	1.172	11.997		31.2955	11.7317	243.347
144513	59.92	1.173	11.999		31.3898	11.7417	243.387
144713	59.92	1.173	11.996		31.3898	11.7417	243.327
144913	59.88	1.175	11.998		31.3688	11.7618	243.367
145113	60.04	1.176	12		31.4526	11.7718	243.408
145313	60.22	1.177	11.998		31.5469	11.7818	243.367
145513	60.16	1.178	11.997		31.5155	11.7918	243.347
145713	60.3	1.178	11.995		31.5888	11.7918	243.306
145913	60.36	1.179	12.002		31.6203	11.8018	243.448
146113	60.54	1.179	12.002		31.7146	11.8018	243.448
146313	60.32	1.182	11.996		31.5993	11.8318	243.327
146513	60.46	1.183	11.994		31.6727	11.8418	243.286
146713	60.56	1.184	11.995		31.725	11.8519	243.306
146913	60.58	1.184	11.996		31.7355	11.8519	243.327
147113	60.74	1.184	11.996		31.8193	11.8519	243.327
147313	60.68	1.187	11.998		31.7879	11.8819	243.367
147513	60.74	1.187	11.999		31.8193	11.8819	243.387
147713	60.88	1.189	11.995		31.8927	11.9019	243.306
147913	60.94	1.189	11.994		31.9241	11.9019	243.286
148113	61.02	1.191	11.997		31.966	11.9219	243.347
148313	61.06	1.192	11.997		31.987	11.9319	243.347
148513	61.12	1.192	11.999		32.0184	11.9319	243.387
148713	61.16	1.193	11.998		32.0394	11.9419	243.367
148913	61.32	1.195	11.995		32.1232	11.962	243.306
149113	61.36	1.195	11.998		32.1441	11.962	243.367
149313	61.26	1.196	11.995		32.0917	11.972	243.306
149513	61.32	1.197	11.996		32.1232	11.982	243.327
149713	61.46	1.198	11.997		32.1965	11.992	243.347
149913	61.52	1.199	11.993		32.2279	12.002	243.266
150113	61.48	1.2	11.999		32.207	12.012	243.387
150313	61.56	1.202	11.994		32.2489	12.032	243.286
150513	61.62	1.203	11.998		32.2803	12.042	243.367
150713	61.7	1.203	11.999		32.3222	12.042	243.387
150913	61.72	1.205	11.996		32.3327	12.0621	243.327
151113	61.82	1.205	11.999		32.3851	12.0621	243.387
151313	61.78	1.206	11.998		32.3641	12.0721	243.367
151513	61.82	1.207	11.998		32.3851	12.0821	243.367
151713	61.98	1.208	11.999		32.4689	12.0921	243.387
151913	61.88	1.21	11.997		32.4165	12.1121	243.347
152113	61.88	1.21	11.996		32.4165	12.1121	243.327
152313	62.1	1.211	11.996		32.5318	12.1221	243.327
152513	62.2	1.213	11.998		32.5842	12.1421	243.367
152713	62.18	1.214	11.998		32.5737	12.1522	243.367
152913	62.26	1.215	11.998		32.6156	12.1622	243.367
153113	62.44	1.215	11.998		32.7099	12.1622	243.367
153313	62.52	1.217	11.996		32.7518	12.1822	243.327
153513	62.58	1.217	11.998		32.7832	12.1822	243.367
153713	62.44	1.218	11.998		32.7099	12.1922	243.367
153913	62.78	1.219	11.998		32.888	12.2022	243.367
154113	62.7	1.221	11.998		32.8461	12.2222	243.367
154313	62.78	1.221	11.997		32.888	12.2222	243.347
154513	62.72	1.221	11.998		32.8566	12.2222	243.367
154713	62.74	1.223	11.998		32.8671	12.2422	243.367
154913	62.86	1.224	11.998		32.9299	12.2523	243.367
155113	62.96	1.225	11.996		32.9823	12.2623	243.327
155313	63	1.226	11.997		33.0033	12.2723	243.347
155513	63	1.228	11.994		33.0033	12.2923	243.286
155713	63	1.228	11.998		33.0033	12.2923	243.367
155913	63.12	1.23	11.998		33.0661	12.3123	243.367
156113	63.18	1.231	11.998		33.0976	12.3223	243.367
156313	63.3	1.231	11.998		33.1604	12.3223	243.367
156513	63.34	1.233	11.998		33.1814	12.3423	243.367
156713	63.18	1.234	11.994		33.0976	12.3524	243.286
156913	63.5	1.234	11.997		33.2652	12.3524	243.347
157113	63.38	1.235	11.998		33.2023	12.3624	243.367
157313	63.46	1.235	11.995		33.2442	12.3624	243.306
157513	63.6	1.238	11.998		33.3176	12.3924	243.367
157713	63.62	1.239	11.997		33.3281	12.4024	243.347
157913	63.62	1.239	11.999		33.3281	12.4024	243.387
158113	63.64	1.241	11.996		33.3385	12.4224	243.327
158313	63.6	1.241	11.997		33.3176	12.4224	243.347
158513	63.72	1.243	11.998		33.3804	12.4424	243.367
158713	63.82	1.243	12.001		33.4328	12.4424	243.428
158913	63.9	1.244	11.998		33.4747	12.4525	243.367
159113	63.92	1.245	11.997		33.4852	12.4625	243.347
159313	63.98	1.246	11.994		33.5166	12.4725	243.286
159513	64.12	1.248	11.994		33.59	12.4925	243.286
159713	64.02	1.247	11.998		33.5376	12.4825	243.367
159913	64.04	1.249	11.998		33.5481	12.5025	243.367
160113	64.12	1.25	11.999		33.59	12.5125	243.387
160313	64.26	1.252	11.997		33.6633	12.5325	243.347
160513	64.28	1.252	11.996		33.6738	12.5325	243.327
160713	64.4	1.253	11.998		33.7367	12.5425	243.367
160913	64.3	1.255	11.996		33.6843	12.5626	243.327
161113	64.52	1.255	11.998		33.7995	12.5626	243.367
161313	64.38	1.255	11.996		33.7262	12.5626	243.327
161513	64.44	1.257	11.998		33.7576	12.5826	243.367
161713	64.68	1.259	11.997		33.8833	12.6026	243.347
161913	64.7	1.26	11.998		33.8938	12.6126	243.367
162113	64.8	1.26	11.997		33.9462	12.6126	243.347
162313	64.74	1.262	11.996		33.9148	12.6326	243.327
162513	64.82	1.263	11.998		33.9567	12.6426	243.367
162713	64.84	1.263	11.998		33.9672	12.6426	243.367
162913	64.82	1.264	12		33.9567	12.6527	243.408
163113	65.02	1.265	11.997		34.0615	12.6627	243.347
163313	64.9	1.267	11.994		33.9986	12.6827	243.286
163513	65.18	1.267	12		34.1453	12.6827	243.408
163713	65.14	1.269	11.997		34.1243	12.7027	243.347
163913	65.26	1.269	11.995		34.1872	12.7027	243.306
164113	65.5	1.271	11.999		34.3129	12.7227	243.387
164313	65.32	1.271	11.996		34.2186	12.7227	243.327
164513	65.46	1.273	12		34.292	12.7427	243.408
164713	65.34	1.273	11.997		34.2291	12.7427	243.347
164913	65.5	1.275	12		34.3129	12.7628	243.408
165113	65.54	1.276	11.999		34.3339	12.7728	243.387
165313	65.58	1.275	11.998		34.3548	12.7628	243.367
165513	65.5	1.278	11.998		34.3129	12.7928	243.367
165713	65.48	1.278	11.999		34.3024	12.7928	243.387
165913	65.7	1.279	12		34.4177	12.8028	243.408
166113	65.72	1.279	11.996		34.4282	12.8028	243.327
166313	65.9	1.281	11.996		34.5225	12.8228	243.327
166513	65.88	1.282	11.997		34.512	12.8328	243.347
166713	66	1.283	11.994		34.5748	12.8428	243.286
166913	66.04	1.284	12		34.5958	12.8529	243.408
167113	65.96	1.285	11.999		34.5539	12.8629	243.387
167313	66.14	1.286	11.998		34.6482	12.8729	243.367
167513	66.22	1.287	11.995		34.6901	12.8829	243.306
167713	66.12	1.288	11.999		34.6377	12.8929	243.387
167913	66.42	1.289	11.999		34.7949	12.9029	243.387
168113	66.36	1.29	11.996		34.7634	12.9129	243.327
168313	66.34	1.291	11.996		34.753	12.9229	243.327
168513	66.42	1.292	11.994		34.7949	12.9329	243.286
168713	66.5	1.294	11.998		34.8368	12.953	243.367
168913	66.12	1.294	11.998		34.6377	12.953	243.367
169113	66.58	1.295	11.999		34.8787	12.963	243.387
169313	66.24	1.297	11.997		34.7006	12.983	243.347
169513	66.6	1.297	11.997		34.8892	12.983	243.347
169713	66.68	1.297	11.998		34.9311	12.983	243.367
169913	66.78	1.299	11.994		34.9835	13.003	243.286
170113	66.86	1.3	12		35.0254	13.013	243.408
170313	66.86	1.301	11.998		35.0254	13.023	243.367
170513	66.88	1.302	11.995		35.0358	13.033	243.306
170713	67.12	1.303	11.997		35.1616	13.043	243.347
170913	67.1	1.304	11.994		35.1511	13.0531	243.286
171113	67.08	1.306	11.997		35.1406	13.0731	243.347
171313	67.18	1.305	11.996		35.193	13.0631	243.327
171513	66.94	1.306	11.996		35.0673	13.0731	243.327
171713	67.28	1.308	11.994		35.2454	13.0931	243.286
171913	67.28	1.31	11.999		35.2454	13.1131	243.387
172113	67.38	1.31	11.996		35.2978	13.1131	243.327
172313	67.4	1.311	11.998		35.3082	13.1231	243.367
172513	67.5	1.312	11.996		35.3606	13.1331	243.327
172713	67.08	1.313	11.997		35.1406	13.1431	243.347
172913	67.26	1.314	11.998		35.2349	13.1532	243.367
173113	67.66	1.314	11.996		35.4445	13.1532	243.327
173313	67.48	1.316	11.996		35.3502	13.1732	243.327
173513	67.72	1.317	11.994		35.4759	13.1832	243.286
173713	67.5	1.318	11.997		35.3606	13.1932	243.347
173913	67.78	1.319	11.996		35.5073	13.2032	243.327
174113	67.42	1.319	11.996		35.3187	13.2032	243.327
174313	67.42	1.319	11.996		35.3187	13.2032	243.327
174513	67.54	1.322	11.999		35.3816	13.2332	243.387
174713	67.96	1.323	11.997		35.6016	13.2432	243.347
174913	67.96	1.324	11.997		35.6016	13.2533	243.347
175113	68	1.325	11.998		35.6226	13.2633	243.367
175313	68.04	1.326	11.997		35.6435	13.2733	243.347
175513	67.94	1.327	11.994		35.5911	13.2833	243.286
175713	67.92	1.328	11.997		35.5807	13.2933	243.347
175913	68.16	1.328	11.995		35.7064	13.2933	243.306
176113	68.24	1.33	11.994		35.7483	13.3133	243.286
176313	68.32	1.33	11.998		35.7902	13.3133	243.367
176513	68.28	1.331	11.997		35.7692	13.3233	243.347
176713	68.26	1.333	11.996		35.7588	13.3433	243.327
176913	68.48	1.335	11.996		35.874	13.3634	243.327
177113	68.5	1.335	11.994		35.8845	13.3634	243.286
177313	68.2	1.335	11.996		35.7273	13.3634	243.327
177513	68.2	1.335	11.996		35.7273	13.3634	243.327
177713	68.16	1.337	11.996		35.7064	13.3834	243.327
177913	68.48	1.338	11.992		35.874	13.3934	243.245
178113	68.94	1.341	11.997		36.115	13.4234	243.347
178313	68.36	1.34	11.999		35.8112	13.4134	243.387
178513	68.8	1.342	11.998		36.0417	13.4334	243.367
178713	68.9	1.343	11.994		36.094	13.4434	243.286
178913	68.62	1.343	11.997		35.9474	13.4434	243.347
179113	69.02	1.345	11.995		36.1569	13.4635	243.306
179313	68.86	1.345	11.996		36.0731	13.4635	243.327
179513	69.1	1.347	11.997		36.1988	13.4835	243.347
179713	68.9	1.348	11.997		36.094	13.4935	243.347
179913	68.8	1.348	11.997		36.0417	13.4935	243.347
180113	69.38	1.349	11.995		36.3455	13.5035	243.306
180313	68.9	1.351	11.996		36.094	13.5235	243.327
180513	69.34	1.352	11.995		36.3245	13.5335	243.306
180713	69.46	1.353	11.995		36.3874	13.5435	243.306
180913	69.58	1.353	11.997		36.4503	13.5435	243.347
181113	69.58	1.355	12		36.4503	13.5636	243.408
181313	69.68	1.357	11.997		36.5027	13.5836	243.347
181513	69.88	1.356	11.995		36.6074	13.5736	243.306
181713	69.04	1.358	11.998		36.1674	13.5936	243.367
181913	69.48	1.358	11.996		36.3979	13.5936	243.327
182113	69.46	1.36	11.997		36.3874	13.6136	243.347
182313	69.42	1.36	11.994		36.3664	13.6136	243.286
182513	69.5	1.362	11.996		36.4084	13.6336	243.327
182713	70.04	1.363	11.996		36.6912	13.6436	243.327
182913	69.7	1.364	11.996		36.5131	13.6537	243.327
183113	69.44	1.365	11.995		36.3769	13.6637	243.306
183313	69.66	1.366	11.996		36.4922	13.6737	243.327
183513	70.14	1.367	11.995		36.7436	13.6837	243.306
183713	69.9	1.367	11.995		36.6179	13.6837	243.306
183913	70.26	1.368	11.996		36.8065	13.6937	243.327
184113	70.22	1.369	11.996		36.7855	13.7037	243.327
184313	70.28	1.371	11.996		36.817	13.7237	243.327
184513	70.32	1.372	11.997		36.8379	13.7337	243.347
184713	70.34	1.373	11.997		36.8484	13.7437	243.347
184913	70.14	1.374	11.996		36.7436	13.7538	243.327
185113	70.42	1.375	11.996		36.8903	13.7638	243.327
185313	70.66	1.376	11.995		37.016	13.7738	243.306
185513	70.14	1.376	11.997		36.7436	13.7738	243.347
185713	70.58	1.378	11.996		36.9741	13.7938	243.327
185913	70.54	1.379	11.995		36.9532	13.8038	243.306
186113	70.78	1.381	11.996		37.0789	13.8238	243.327
186313	70.86	1.381	11.996		37.1208	13.8238	243.327
186513	70.52	1.381	11.995		36.9427	13.8238	243.306
186713	70.3	1.383	11.996		36.8274	13.8438	243.327
186913	70.86	1.384	11.995		37.1208	13.8539	243.306
187113	71.02	1.385	11.996		37.2046	13.8639	243.327
187313	70.8	1.385	11.996		37.0894	13.8639	243.327
187513	71.12	1.386	11.995		37.257	13.8739	243.306
187713	71	1.388	11.997		37.1941	13.8939	243.347
187913	70.76	1.39	11.995		37.0684	13.9139	243.306
188113	70.88	1.39	11.995		37.1313	13.9139	243.306
188313	71.36	1.391	11.996		37.3827	13.9239	243.327
188513	71.38	1.392	11.993		37.3932	13.9339	243.266
188713	71.6	1.393	11.998		37.5085	13.9439	243.367
188913	71	1.394	11.996		37.1941	13.954	243.327
189113	71.44	1.395	11.995		37.4246	13.964	243.306
189313	71.68	1.396	11.993		37.5504	13.974	243.266
189513	71.46	1.396	11.996		37.4351	13.974	243.327
189713	71.18	1.396	11.998		37.2884	13.974	243.367
189913	70.94	1.4	11.995		37.1627	14.014	243.306
190113	71.42	1.399	11.995		37.4142	14.004	243.306
190313	71.38	1.4	11.996		37.3932	14.014	243.327
190513	71.56	1.402	11.996		37.4875	14.034	243.327
190713	71.42	1.403	11.994		37.4142	14.044	243.286
190913	71.26	1.404	11.995		37.3304	14.0541	243.306
191113	71.36	1.404	11.995		37.3827	14.0541	243.306
191313	71.48	1.405	11.998		37.4456	14.0641	243.367
191513	71.76	1.406	11.995		37.5923	14.0741	243.306
191713	72.08	1.408	11.995		37.7599	14.0941	243.306
191913	71.94	1.408	11.994		37.6866	14.0941	243.286
192113	71.94	1.408	11.994		37.6866	14.0941	243.286
192313	72.06	1.41	11.994		37.7494	14.1141	243.286
192513	71.96	1.412	11.994		37.6971	14.1341	243.286
192713	72.2	1.413	11.997		37.8228	14.1441	243.347
192913	71.92	1.414	11.998		37.6761	14.1542	243.367
193113	71.9	1.414	11.998		37.6656	14.1542	243.367
193313	71.9	1.414	11.998		37.6656	14.1542	243.367
193513	71.88	1.417	11.994		37.6551	14.1842	243.286
193713	72.16	1.418	11.994		37.8018	14.1942	243.286
193913	72.38	1.418	11.998		37.9171	14.1942	243.367
194113	72.6	1.42	11.995		38.0323	14.2142	243.306
194313	72.54	1.421	11.994		38.0009	14.2242	243.286
194513	71.92	1.421	11.996		37.6761	14.2242	243.327
194713	72.12	1.422	11.992		37.7809	14.2342	243.245
194913	72.76	1.424	11.994		38.1161	14.2543	243.286
195113	72.64	1.425	11.997		38.0533	14.2643	243.347
195313	72.64	1.425	11.997		38.0533	14.2643	243.347
195513	72.64	1.425	11.997		38.0533	14.2643	243.347
195713	72.48	1.428	11.996		37.9695	14.2943	243.327
195913	72.44	1.428	11.997		37.9485	14.2943	243.347
196113	72.06	1.429	11.996		37.7494	14.3043	243.327
196313	72.68	1.431	11.999		38.0742	14.3243	243.387
196513	72.94	1.432	11.995		38.2104	14.3343	243.306
196713	73	1.433	11.998		38.2419	14.3443	243.367
196913	72.94	1.434	11.996		38.2104	14.3544	243.327
197113	72.94	1.434	11.996		38.2104	14.3544	243.327
197313	73.32	1.436	11.997		38.4095	14.3744	243.347
197513	73.12	1.437	11.997		38.3047	14.3844	243.347
197713	73	1.438	11.995		38.2419	14.3944	243.306
197913	73.06	1.439	11.995		38.2733	14.4044	243.306
198113	73.02	1.44	11.995		38.2523	14.4144	243.306
198313	73.02	1.44	11.995		38.2523	14.4144	243.306
198513	72.88	1.442	11.996		38.179	14.4344	243.327
198713	73.04	1.442	11.995		38.2628	14.4344	243.306
198913	73.04	1.442	11.995		38.2628	14.4344	243.306
199113	72.92	1.444	11.996		38.2	14.4545	243.327
199313	73.38	1.446	11.995		38.4409	14.4745	243.306
199513	72.98	1.446	11.996		38.2314	14.4745	243.327
199713	73.66	1.448	11.995		38.5876	14.4945	243.306
199913	73.66	1.45	11.996		38.5876	14.5145	243.327
200113	74.06	1.451	11.994		38.7972	14.5245	243.286
200313	74.06	1.451	11.994		38.7972	14.5245	243.286
200513	74.02	1.452	11.996		38.7762	14.5345	243.327
200713	74.06	1.453	11.996		38.7972	14.5445	243.327
200913	73.96	1.454	11.996		38.7448	14.5546	243.327
201113	73.52	1.455	11.996		38.5143	14.5646	243.327
201313	73.78	1.455	11.996		38.6505	14.5646	243.327
201513	73.88	1.457	11.994		38.7029	14.5846	243.286
201713	73.86	1.457	11.995		38.6924	14.5846	243.306
201913	73.66	1.459	11.995		38.5876	14.6046	243.306
202113	74.16	1.46	11.996		38.8496	14.6146	243.327
202313	74.4	1.461	11.996		38.9753	14.6246	243.327
202513	74.16	1.462	11.994		38.8496	14.6346	243.286
202713	73.72	1.463	11.996		38.6191	14.6446	243.327
202913	74.14	1.464	11.996		38.8391	14.6547	243.327
203113	74.28	1.464	11.995		38.9124	14.6547	243.306
203313	74.34	1.467	11.995		38.9438	14.6847	243.306
203513	74.16	1.466	11.995		38.8496	14.6747	243.306
203713	74.7	1.468	11.995		39.1324	14.6947	243.306
203913	74.68	1.469	11.998		39.122	14.7047	243.367
204113	74.18	1.468	11.994		38.86	14.6947	243.286
204313	74.74	1.47	11.996		39.1534	14.7147	243.327
204513	75.04	1.472	11.996		39.3105	14.7347	243.327
204713	74.96	1.473	11.994		39.2686	14.7447	243.286
204913	74.86	1.473	11.996		39.2163	14.7447	243.327
205113	74.9	1.475	11.998		39.2372	14.7648	243.367
205313	75	1.475	12		39.2896	14.7648	243.408
205513	75.1	1.476	11.997		39.342	14.7748	243.347
205713	74.84	1.478	11.994		39.2058	14.7948	243.286
205913	74.6	1.478	11.996		39.08	14.7948	243.327
206113	74.66	1.478	11.998		39.1115	14.7948	243.367
206313	75.12	1.481	11.996		39.3525	14.8248	243.327
206513	75.52	1.482	11.994		39.562	14.8348	243.286
206713	74.92	1.482	12		39.2477	14.8348	243.408
206913	75.18	1.484	11.997		39.3839	14.8549	243.347
207113	75.28	1.484	11.996		39.4363	14.8549	243.327
207313	74.94	1.485	11.996		39.2582	14.8649	243.327
207513	75.24	1.487	11.995		39.4153	14.8849	243.306
207713	75.66	1.488	11.994		39.6353	14.8949	243.286
207913	75.5	1.489	11.996		39.5515	14.9049	243.327
208113	75.72	1.49	11.997		39.6668	14.9149	243.347
208313	75.5	1.491	11.995		39.5515	14.9249	243.306
208513	75.86	1.492	11.997		39.7401	14.9349	243.347
208713	75.48	1.493	11.996		39.541	14.9449	243.327
208913	75.38	1.494	11.997		39.4887	14.955	243.347
209113	75.7	1.494	11.997		39.6563	14.955	243.347
209313	75.7	1.495	11.998		39.6563	14.965	243.367
209513	75.92	1.497	11.993		39.7715	14.985	243.266
209713	76.16	1.498	11.998		39.8973	14.995	243.367
209913	75.82	1.498	11.995		39.7192	14.995	243.306
210113	76.2	1.5	11.998		39.9182	15.015	243.367
210313	76.06	1.501	11.994		39.8449	15.025	243.286
210513	75.8	1.501	11.995		39.7087	15.025	243.306
210713	75.94	1.503	11.996		39.782	15.045	243.327
210913	75.92	1.504	11.994		39.7715	15.0551	243.286
211113	76.48	1.505	11.996		40.0649	15.0651	243.327
211313	76.4	1.507	11.998		40.023	15.0851	243.367
211513	75.92	1.506	11.998		39.7715	15.0751	243.367
211713	76.72	1.508	11.999		40.1906	15.0951	243.387
211913	76.46	1.509	11.998		40.0544	15.1051	243.367
212113	76.68	1.509	11.995		40.1697	15.1051	243.306
212313	76.58	1.51	11.999		40.1173	15.1151	243.387
212513	76.5	1.512	11.997		40.0754	15.1351	243.347
212713	76.24	1.514	11.996		39.9392	15.1552	243.327
212913	76.24	1.514	11.996		39.9392	15.1552	243.327
213113	76.24	1.515	11.996		39.9392	15.1652	243.327
213313	76.24	1.515	11.996		39.9392	15.1652	243.327
213513	76.42	1.517	11.996		40.0335	15.1852	243.327
213713	76.3	1.518	11.998		39.9706	15.1952	243.367
213913	77.06	1.519	11.998		40.3687	15.2052	243.367
214113	77.08	1.52	11.997		40.3792	15.2152	243.347
214313	77.08	1.52	11.997		40.3792	15.2152	243.347
214513	76.92	1.521	11.996		40.2954	15.2252	243.327
214713	77.02	1.524	11.997		40.3478	15.2553	243.347
214913	77.34	1.524	11.995		40.5154	15.2553	243.306
215113	77.64	1.525	11.995		40.6726	15.2653	243.306
215313	77.14	1.526	11.998		40.4107	15.2753	243.367
215513	77.14	1.526	11.995		40.4107	15.2753	243.306
215713	77.46	1.528	11.999		40.5783	15.2953	243.387
215913	77.24	1.529	12		40.463	15.3053	243.408
216113	77.52	1.53	11.997		40.6097	15.3153	243.347
216313	77.52	1.531	11.998		40.6097	15.3253	243.367
216513	77.8	1.531	11.996		40.7564	15.3253	243.327
216713	76.98	1.532	11.996		40.3268	15.3353	243.327
216913	77.02	1.533	11.997		40.3478	15.3453	243.347
217113	77.2	1.534	11.996		40.4421	15.3554	243.327
217313	77.94	1.536	11.996		40.8297	15.3754	243.327
217513	77.78	1.537	11.995		40.7459	15.3854	243.306
217713	77.24	1.538	12		40.463	15.3954	243.408
217913	77.4	1.539	11.998		40.5469	15.4054	243.367
218113	78.1	1.54	11.996		40.9136	15.4154	243.327
218313	77.76	1.541	11.996		40.7355	15.4254	243.327
218513	77.86	1.542	11.994		40.7878	15.4354	243.286
218713	77.54	1.543	11.994		40.6202	15.4454	243.286
218913	77.94	1.543	11.995		40.8297	15.4454	243.306
219113	78.02	1.544	11.998		40.8717	15.4555	243.367
219313	78.24	1.546	11.994		40.9869	15.4755	243.286
219513	77.58	1.547	11.996		40.6412	15.4855	243.327
219713	78.08	1.548	11.996		40.9031	15.4955	243.327
219913	78.3	1.548	11.995		41.0183	15.4955	243.306
220113	77.96	1.55	11.998		40.8402	15.5155	243.367
220313	78.16	1.55	11.995		40.945	15.5155	243.306
220513	78.62	1.553	11.998		41.186	15.5455	243.367
220713	78.7	1.553	11.996		41.2279	15.5455	243.327
220913	78.66	1.554	11.996		41.2069	15.5556	243.327
221113	78.36	1.554	11.995		41.0498	15.5556	243.306
221313	78.8	1.556	11.996		41.2803	15.5756	243.327
221513	78.56	1.556	11.996		41.1545	15.5756	243.327
221713	77.92	1.557	11.997		40.8193	15.5856	243.347
221913	78.04	1.558	11.997		40.8821	15.5956	243.347
222113	78.9	1.56	11.995		41.3327	15.6156	243.306
222313	78.9	1.561	11.994		41.3327	15.6256	243.286
222513	79.04	1.561	11.996		41.406	15.6256	243.327
222713	78.3	1.562	11.997		41.0183	15.6356	243.347
222913	78.58	1.564	11.994		41.165	15.6557	243.286
223113	79.16	1.565	11.998		41.4689	15.6657	243.367
223313	78.84	1.566	11.999		41.3012	15.6757	243.387
223513	78.76	1.566	11.994		41.2593	15.6757	243.286
223713	79.14	1.567	11.997		41.4584	15.6857	243.347
223913	79.34	1.57	11.998		41.5632	15.7157	243.367
224113	78.88	1.571	11.996		41.3222	15.7257	243.327
224313	78.8	1.571	11.994		41.2803	15.7257	243.286
224513	79.5	1.572	11.995		41.647	15.7357	243.306
224713	79.24	1.573	11.993		41.5108	15.7457	243.266
224913	79.22	1.575	11.999		41.5003	15.7658	243.387
225113	79.58	1.575	11.996		41.6889	15.7658	243.327
225313	79.72	1.576	11.996		41.7622	15.7758	243.327
225513	79.44	1.578	11.997		41.6155	15.7958	243.347
225713	79.64	1.578	11.994		41.7203	15.7958	243.286
225913	79.64	1.578	11.994		41.7203	15.7958	243.286
226113	79.96	1.58	11.998		41.8879	15.8158	243.367
226313	79.6	1.581	11.998		41.6994	15.8258	243.367
226513	79.62	1.582	11.997		41.7098	15.8358	243.347
226713	79.6	1.582	11.995		41.6994	15.8358	243.306
226913	80.08	1.584	11.997		41.9508	15.8559	243.347
227113	79.62	1.585	11.996		41.7098	15.8659	243.327
227313	80.1	1.587	11.997		41.9613	15.8859	243.347
227513	79.9	1.587	11.996		41.8565	15.8859	243.327
227713	80.04	1.588	11.996		41.9299	15.8959	243.327
227913	80.08	1.589	11.996		41.9508	15.9059	243.327
228113	80.22	1.591	11.998		42.0241	15.9259	243.367
228313	80.42	1.591	11.994		42.1289	15.9259	243.286
228513	80.04	1.592	11.995		41.9299	15.9359	243.306
228713	80.36	1.593	11.994		42.0975	15.9459	243.286
228913	80.14	1.594	12		41.9822	15.956	243.408
229113	80.54	1.595	11.998		42.1918	15.966	243.367
229313	80.36	1.596	11.999		42.0975	15.976	243.387
229513	80.44	1.597	11.997		42.1394	15.986	243.347
229713	80.24	1.597	11.994		42.0346	15.986	243.286
229913	80	1.598	11.998		41.9089	15.996	243.367
230113	80.62	1.6	11.995		42.2337	16.016	243.306
230313	80.72	1.601	11.994		42.2861	16.026	243.286
230513	80.9	1.602	11.994		42.3804	16.036	243.286
230713	80.76	1.604	11.996		42.307	16.0561	243.327
230913	80.9	1.605	11.996		42.3804	16.0661	243.327
231113	81.02	1.605	11.997		42.4432	16.0661	243.347
231313	80.56	1.606	11.997		42.2023	16.0761	243.347
231513	80.42	1.606	11.997		42.1289	16.0761	243.347
231713	80.84	1.608	11.997		42.3489	16.0961	243.347
231913	80.76	1.609	11.997		42.307	16.1061	243.347
232113	80.82	1.61	11.996		42.3385	16.1161	243.327
232313	80.64	1.611	11.996		42.2442	16.1261	243.327
232513	81.16	1.612	11.996		42.5166	16.1361	243.327
232713	81.12	1.614	11.998		42.4956	16.1562	243.367
232913	80.66	1.614	11.993		42.2546	16.1562	243.266
233113	81.1	1.615	11.999		42.4851	16.1662	243.387
233313	81.38	1.616	11.998		42.6318	16.1762	243.367
233513	81.22	1.618	11.995		42.548	16.1962	243.306
233713	81.22	1.618	11.995		42.548	16.1962	243.306
233913	81.5	1.619	11.997		42.6947	16.2062	243.347
234113	81.66	1.62	11.995		42.7785	16.2162	243.306
234313	81.6	1.62	11.999		42.7471	16.2162	243.387
234513	81.34	1.622	11.995		42.6109	16.2362	243.306
234713	81.72	1.622	11.995		42.8099	16.2362	243.306
234913	81.78	1.623	11.996		42.8414	16.2462	243.327
235113	81.94	1.624	11.996		42.9252	16.2563	243.327
235313	81.56	1.626	11.997		42.7261	16.2763	243.347
235513	81.54	1.627	11.996		42.7156	16.2863	243.327
235713	81.94	1.628	11.994		42.9252	16.2963	243.286
235913	82.06	1.629	11.995		42.9881	16.3063	243.306
236113	81.48	1.629	11.995		42.6842	16.3063	243.306
236313	81.34	1.631	11.995		42.6109	16.3263	243.306
236513	82.04	1.631	11.998		42.9776	16.3263	243.367
236713	82.1	1.633	11.995		43.009	16.3463	243.306
236913	81.82	1.634	11.996		42.8623	16.3564	243.327
237113	82.08	1.635	11.996		42.9985	16.3664	243.327
237313	82.36	1.636	11.996		43.1452	16.3764	243.327
237513	82.32	1.637	11.996		43.1243	16.3864	243.327
237713	82.12	1.637	11.999		43.0195	16.3864	243.387
237913	81.9	1.639	11.997		42.9042	16.4064	243.347
238113	82.3	1.64	11.994		43.1138	16.4164	243.286
238313	82.46	1.642	11.995		43.1976	16.4364	243.306
238513	82.54	1.642	11.997		43.2395	16.4364	243.347
238713	82.54	1.642	11.997		43.2395	16.4364	243.347
238913	82.7	1.644	11.994		43.3233	16.4565	243.286
239113	82.64	1.645	11.993		43.2919	16.4665	243.266
239313	82.44	1.646	11.995		43.1871	16.4765	243.306
239513	82.4	1.647	11.997		43.1662	16.4865	243.347
239713	82.9	1.648	11.996		43.4281	16.4965	243.327
239913	82.92	1.65	11.994		43.4386	16.5165	243.286
240113	82.78	1.65	11.996		43.3652	16.5165	243.327
240313	82.88	1.65	11.996		43.4176	16.5165	243.327
240513	82.7	1.652	11.997		43.3233	16.5365	243.347
240713	82.92	1.653	11.995		43.4386	16.5465	243.306
240913	83.1	1.654	11.996		43.5329	16.5566	243.327
241113	82.92	1.655	11.995		43.4386	16.5666	243.306
241313	83.26	1.655	11.994		43.6167	16.5666	243.286
241513	83.2	1.657	11.998		43.5853	16.5866	243.367
241713	82.98	1.658	11.996		43.47	16.5966	243.327
241913	83.14	1.659	11.996		43.5538	16.6066	243.327
242113	83.18	1.661	11.996		43.5748	16.6266	243.327
242313	83.14	1.661	12		43.5538	16.6266	243.408
242513	83.14	1.661	12		43.5538	16.6266	243.408
242713	83.36	1.662	11.996		43.6691	16.6366	243.327
242913	83.58	1.664	11.996		43.7843	16.6567	243.327
243113	83.5	1.665	11.998		43.7424	16.6667	243.367
243313	83.5	1.665	11.998		43.7424	16.6667	243.367
243513	83.74	1.667	11.994		43.8681	16.6867	243.286
243713	83.56	1.668	11.994		43.7738	16.6967	243.286
243913	83.72	1.669	11.996		43.8577	16.7067	243.327
244113	83.78	1.669	11.996		43.8891	16.7067	243.327
244313	83.5	1.671	11.996		43.7424	16.7267	243.327
244513	83.68	1.672	11.994		43.8367	16.7367	243.286
244713	84.02	1.673	11.998		44.0148	16.7467	243.367
244913	83.86	1.674	11.998		43.931	16.7568	243.367
245113	83.52	1.674	11.996		43.7529	16.7568	243.327
245313	83.92	1.676	11.996		43.9624	16.7768	243.327
245513	84.18	1.677	11.997		44.0986	16.7868	243.347
245713	83.5	1.679	11.997		43.7424	16.8068	243.347
245913	83.74	1.678	11.997		43.8681	16.7968	243.347
246113	83.72	1.679	11.994		43.8577	16.8068	243.286
246313	84.22	1.681	11.997		44.1196	16.8268	243.347
246513	84.22	1.681	11.997		44.1196	16.8268	243.347
246713	84.06	1.683	11.998		44.0358	16.8468	243.367
246913	84.06	1.684	11.996		44.0358	16.8569	243.327
247113	84.06	1.684	11.996		44.0358	16.8569	243.327
247313	84.18	1.687	11.996		44.0986	16.8869	243.327
247513	84.04	1.686	11.996		44.0253	16.8769	243.327
247713	84.5	1.687	11.998		44.2663	16.8869	243.367
247913	84.42	1.688	11.998		44.2244	16.8969	243.367
248113	84.38	1.69	11.998		44.2034	16.9169	243.367
248313	84.04	1.69	11.995		44.0253	16.9169	243.306
248513	84.36	1.692	11.995		44.1929	16.9369	243.306
248713	84.76	1.693	11.997		44.4025	16.9469	243.347
248913	84.64	1.694	11.997		44.3396	16.957	243.347
249113	84.46	1.695	11.994		44.2453	16.967	243.286
249313	84.42	1.696	11.997		44.2244	16.977	243.347
249513	84.84	1.697	11.996		44.4444	16.987	243.327
249713	84.62	1.697	11.997		44.3291	16.987	243.347
249913	84.42	1.699	11.998		44.2244	17.007	243.367
250113	84.96	1.699	11.997		44.5073	17.007	243.347
250313	84.94	1.701	12		44.4968	17.027	243.408
250513	84.96	1.702	11.997		44.5073	17.037	243.347
250713	84.58	1.703	11.998		44.3082	17.047	243.367
250913	85.06	1.704	11.998		44.5596	17.0571	243.367
251113	84.78	1.706	11.994		44.413	17.0771	243.286
251313	85.36	1.707	11.999		44.7168	17.0871	243.387
251513	85.06	1.707	12		44.5596	17.0871	243.408
251713	85.2	1.708	11.996		44.633	17.0971	243.327
251913	85.4	1.708	11.998		44.7378	17.0971	243.367
252113	85.04	1.71	11.996		44.5492	17.1171	243.327
252313	85.1	1.71	11.996		44.5806	17.1171	243.327
252513	85.1	1.711	11.998		44.5806	17.1271	243.367
252713	85.56	1.713	11.996		44.8216	17.1471	243.327
252913	85.2	1.714	11.999		44.633	17.1572	243.387
253113	85.26	1.715	11.995		44.6644	17.1672	243.306
253313	85.38	1.716	11.996		44.7273	17.1772	243.327
253513	85.28	1.717	11.994		44.6749	17.1872	243.286
253713	85.46	1.717	11.996		44.7692	17.1872	243.327
253913	85.52	1.719	11.998		44.8006	17.2072	243.367
254113	85.54	1.719	11.996		44.8111	17.2072	243.327
254313	85.74	1.72	11.996		44.9159	17.2172	243.327
254513	85.66	1.722	11.998		44.874	17.2372	243.367
254713	85.78	1.723	11.994		44.9368	17.2472	243.286
254913	85.78	1.724	11.998		44.9368	17.2573	243.367
255113	85.9	1.725	11.998		44.9997	17.2673	243.367
255313	85.76	1.726	11.996		44.9263	17.2773	243.327
255513	85.78	1.727	11.999		44.9368	17.2873	243.387
255713	85.94	1.728	11.996		45.0206	17.2973	243.327
255913	86.1	1.729	11.995		45.1045	17.3073	243.306
256113	86.14	1.73	11.995		45.1254	17.3173	243.306
256313	85.72	1.732	11.994		44.9054	17.3373	243.286
256513	86.32	1.732	11.998		45.2197	17.3373	243.367
256713	86.2	1.732	11.997		45.1568	17.3373	243.347
256913	86.08	1.735	11.993		45.094	17.3674	243.266
257113	85.96	1.735	11.998		45.0311	17.3674	243.367
257313	86.26	1.736	11.997		45.1883	17.3774	243.347
257513	86.24	1.737	11.996		45.1778	17.3874	243.327
257713	86.56	1.738	11.998		45.3454	17.3974	243.367
257913	86.46	1.738	11.996		45.293	17.3974	243.327
258113	86.4	1.74	12		45.2616	17.4174	243.408
258313	86.36	1.74	11.996		45.2407	17.4174	243.327
258513	86.3	1.743	11.999		45.2092	17.4474	243.387
258713	86.44	1.743	11.999		45.2826	17.4474	243.387
258913	86.78	1.744	11.996		45.4607	17.4575	243.327
259113	86.7	1.745	11.995		45.4188	17.4675	243.306
259313	86.6	1.747	11.998		45.3664	17.4875	243.367
259513	86.68	1.747	11.998		45.4083	17.4875	243.367
259713	86.8	1.748	11.996		45.4712	17.4975	243.327
259913	86.56	1.749	11.997		45.3454	17.5075	243.347
260113	86.38	1.749	11.996		45.2511	17.5075	243.327
260313	86.92	1.751	11.999		45.534	17.5275	243.387
260513	86.88	1.751	12		45.5131	17.5275	243.408
260713	87.08	1.753	11.997		45.6178	17.5475	243.347
260913	86.78	1.753	11.996		45.4607	17.5475	243.327
261113	87	1.755	11.997		45.5759	17.5676	243.347
261313	87.02	1.755	11.996		45.5864	17.5676	243.327
261513	87.18	1.757	11.998		45.6702	17.5876	243.367
261713	87.4	1.757	11.997		45.7855	17.5876	243.347
261913	87.12	1.759	11.997		45.6388	17.6076	243.347
262113	86.76	1.76	11.994		45.4502	17.6176	243.286
262313	87.32	1.761	12		45.7436	17.6276	243.408
262513	87.28	1.761	11.996		45.7226	17.6276	243.327
262713	87.5	1.762	11.998		45.8379	17.6376	243.367
262913	87.22	1.764	11.997		45.6912	17.6577	243.347
263113	87.56	1.765	11.997		45.8693	17.6677	243.347
263313	87.46	1.767	11.998		45.8169	17.6877	243.367
263513	87.18	1.768	11.998		45.6702	17.6977	243.367
263713	87.62	1.767	11.995		45.9007	17.6877	243.306
263913	87.58	1.768	11.996		45.8798	17.6977	243.327
264113	87.66	1.77	11.996		45.9217	17.7177	243.327
264313	87.36	1.771	11.997		45.7645	17.7277	243.347
264513	87.66	1.772	11.997		45.9217	17.7377	243.347
264713	87.48	1.773	11.996		45.8274	17.7477	243.327
264913	87.48	1.773	11.996		45.8274	17.7477	243.327
265113	87.92	1.775	12		46.0579	17.7678	243.408
265313	87.66	1.776	11.994		45.9217	17.7778	243.286
265513	87.94	1.777	11.994		46.0684	17.7878	243.286
265713	87.98	1.777	11.998		46.0893	17.7878	243.367
265913	87.98	1.777	11.998		46.0893	17.7878	243.367
266113	88.18	1.78	11.997		46.1941	17.8178	243.347
266313	88.24	1.78	11.996		46.2255	17.8178	243.327
266513	87.72	1.781	11.997		45.9531	17.8278	243.347
266713	88.02	1.783	11.998		46.1103	17.8478	243.367
266913	88.16	1.784	11.995		46.1836	17.8579	243.306
267113	88.04	1.785	11.995		46.1207	17.8679	243.306
267313	88.32	1.786	12		46.2674	17.8779	243.408
267513	88	1.786	11.996		46.0998	17.8779	243.327
267713	88.48	1.788	11.994		46.3512	17.8979	243.286
267913	88.08	1.79	11.996		46.1417	17.9179	243.327
268113	87.92	1.79	11.999		46.0579	17.9179	243.387
268313	88.44	1.791	11.998		46.3303	17.9279	243.367
268513	88.56	1.791	11.998		46.3932	17.9279	243.367
268713	88.56	1.792	11.997		46.3932	17.9379	243.347
268913	88.84	1.794	11.999		46.5398	17.958	243.387
269113	88.44	1.795	11.998		46.3303	17.968	243.367
269313	88.08	1.796	11.996		46.1417	17.978	243.327
269513	88.52	1.796	11.999		46.3722	17.978	243.387
269713	88.68	1.798	11.999		46.456	17.998	243.387
269913	88.46	1.799	11.997		46.3408	18.008	243.347
270113	88.58	1.8	11.996		46.4036	18.018	243.327
270313	88.56	1.802	11.994		46.3932	18.038	243.286
270513	88.82	1.802	11.999		46.5294	18.038	243.387
270713	88.88	1.802	11.997		46.5608	18.038	243.347
270913	88.98	1.804	11.998		46.6132	18.0581	243.367
271113	88.76	1.805	11.998		46.4979	18.0681	243.367
271313	88.88	1.806	11.998		46.5608	18.0781	243.367
271513	88.94	1.807	11.998		46.5922	18.0881	243.367
271713	88.94	1.808	11.998		46.5922	18.0981	243.367
271913	88.62	1.809	11.992		46.4246	18.1081	243.245
272113	89.08	1.81	11.995		46.6656	18.1181	243.306
272313	89.08	1.81	11.995		46.6656	18.1181	243.306
272513	89.28	1.812	11.996		46.7703	18.1381	243.327
272713	89.06	1.813	11.998		46.6551	18.1481	243.367
272913	88.86	1.814	11.999		46.5503	18.1582	243.387
273113	88.96	1.816	11.994		46.6027	18.1782	243.286
273313	89.2	1.816	11.998		46.7284	18.1782	243.367
273513	89.18	1.817	11.996		46.7179	18.1882	243.327
273713	89.54	1.818	11.996		46.9065	18.1982	243.327
273913	89.56	1.819	11.998		46.917	18.2082	243.367
274113	89.48	1.82	11.996		46.8751	18.2182	243.327
274313	89.68	1.821	11.999		46.9799	18.2282	243.387
274513	89.68	1.822	11.998		46.9799	18.2382	243.367
274713	89.6	1.823	11.994		46.938	18.2482	243.286
274913	89.46	1.824	11.998		46.8646	18.2583	243.367
275113	89.4	1.825	11.996		46.8332	18.2683	243.327
275313	90	1.826	11.998		47.1475	18.2783	243.367
275513	89.9	1.827	11.997		47.0951	18.2883	243.347
275713	89.86	1.828	11.996		47.0742	18.2983	243.327
275913	89.98	1.829	11.997		47.137	18.3083	243.347
276113	89.96	1.83	11.996		47.1266	18.3183	243.327
276313	89.84	1.831	11.994		47.0637	18.3283	243.286
276513	89.7	1.833	11.998		46.9904	18.3483	243.367
276713	89.96	1.833	11.998		47.1266	18.3483	243.367
276913	90.18	1.834	11.998		47.2418	18.3584	243.367
277113	90.06	1.835	11.995		47.1789	18.3684	243.306
277313	89.78	1.836	11.996		47.0323	18.3784	243.327
277513	90.04	1.837	11.998		47.1685	18.3884	243.367
277713	90	1.838	11.997		47.1475	18.3984	243.347
277913	89.76	1.84	11.996		47.0218	18.4184	243.327
278113	89.98	1.841	11.998		47.137	18.4284	243.367
278313	90.02	1.841	11.995		47.158	18.4284	243.306
278513	90.28	1.842	11.998		47.2942	18.4384	243.367
278713	90.44	1.843	11.998		47.378	18.4484	243.367
278913	90.18	1.844	11.995		47.2418	18.4585	243.306
279113	90.34	1.844	11.996		47.3256	18.4585	243.327
279313	90.36	1.846	11.997		47.3361	18.4785	243.347
279513	90.4	1.847	11.998		47.3571	18.4885	243.367
279713	90.32	1.848	11.995		47.3151	18.4985	243.306
279913	90.5	1.849	11.997		47.4094	18.5085	243.347
280113	90.66	1.85	11.997		47.4933	18.5185	243.347
280313	90.72	1.851	11.996		47.5247	18.5285	243.327
280513	90.7	1.851	11.999		47.5142	18.5285	243.387
280713	90.62	1.853	11.998		47.4723	18.5485	243.367
280913	90.76	1.854	11.997		47.5456	18.5586	243.347
281113	90.76	1.854	11.997		47.5456	18.5586	243.347
281313	90.78	1.857	11.999		47.5561	18.5886	243.387
281513	91.02	1.856	12		47.6819	18.5786	243.408
281713	90.82	1.859	11.996		47.5771	18.6086	243.327
281913	90.96	1.859	11.997		47.6504	18.6086	243.347
282113	90.98	1.86	11.998		47.6609	18.6186	243.367
282313	91.06	1.86	11.998		47.7028	18.6186	243.367
282513	90.98	1.862	11.997		47.6609	18.6386	243.347
282713	91.1	1.864	11.996		47.7238	18.6587	243.327
282913	91.18	1.864	11.997		47.7657	18.6587	243.347
283113	91.12	1.866	11.995		47.7342	18.6787	243.306
283313	91.32	1.866	11.994		47.839	18.6787	243.286
283513	91.34	1.867	11.999		47.8495	18.6887	243.387
283713	91.26	1.868	11.997		47.8076	18.6987	243.347
283913	91.36	1.868	11.996		47.86	18.6987	243.327
284113	91.52	1.871	11.996		47.9438	18.7287	243.327
284313	91.48	1.871	11.998		47.9228	18.7287	243.367
284513	91.38	1.872	11.997		47.8704	18.7387	243.347
284713	91.46	1.873	11.998		47.9124	18.7487	243.367
284913	91.54	1.874	11.996		47.9543	18.7588	243.327
285113	91.32	1.875	11.997		47.839	18.7688	243.347
285313	91.6	1.876	11.996		47.9857	18.7788	243.327
285513	91.56	1.877	11.998		47.9647	18.7888	243.367
285713	91.74	1.877	11.997		48.059	18.7888	243.347
285913	91.28	1.88	11.998		47.8181	18.8188	243.367
286113	91.76	1.88	11.996		48.0695	18.8188	243.327
286313	91.52	1.881	11.996		47.9438	18.8288	243.327
286513	91.88	1.882	11.996		48.1324	18.8388	243.327
286713	91.9	1.883	11.995		48.1428	18.8488	243.306
286913	91.74	1.884	11.998		48.059	18.8589	243.367
287113	91.76	1.886	11.993		48.0695	18.8789	243.266
287313	91.92	1.885	11.996		48.1533	18.8689	243.327
287513	91.78	1.887	11.998		48.08	18.8889	243.367
287713	92.18	1.887	11.998		48.2895	18.8889	243.367
287913	91.92	1.889	11.997		48.1533	18.9089	243.347
288113	91.94	1.89	11.994		48.1638	18.9189	243.286
288313	91.76	1.891	11.998		48.0695	18.9289	243.367
288513	91.98	1.892	11.996		48.1848	18.9389	243.327
288713	92.26	1.892	11.995		48.3314	18.9389	243.306
288913	92.28	1.893	11.996		48.3419	18.9489	243.327
289113	92.3	1.895	11.997		48.3524	18.969	243.347
289313	92.3	1.895	11.998		48.3524	18.969	243.367
289513	92.06	1.897	11.999		48.2267	18.989	243.387
289713	92.3	1.898	11.998		48.3524	18.999	243.367
289913	92.32	1.899	11.998		48.3629	19.009	243.367
290113	92.36	1.9	11.999		48.3838	19.019	243.387
290313	92.36	1.901	11.999		48.3838	19.029	243.387
290513	92.42	1.902	11.997		48.4153	19.039	243.347
290713	92.36	1.904	11.996		48.3838	19.0591	243.327
290913	92.62	1.903	12		48.52	19.049	243.408
291113	92.74	1.904	11.997		48.5829	19.0591	243.347
291313	92.62	1.905	11.994		48.52	19.0691	243.286
291513	92.7	1.907	11.997		48.5619	19.0891	243.347
291713	92.78	1.908	12		48.6038	19.0991	243.408
291913	92.98	1.909	11.995		48.7086	19.1091	243.306
292113	92.74	1.91	11.997		48.5829	19.1191	243.347
292313	92.62	1.912	11.998		48.52	19.1391	243.367
292513	92.98	1.912	11.997		48.7086	19.1391	243.347
292713	92.66	1.913	11.999		48.541	19.1491	243.387
292913	93.04	1.914	11.998		48.7401	19.1592	243.367
293113	93.18	1.916	11.995		48.8134	19.1792	243.306
293313	93	1.917	11.996		48.7191	19.1892	243.327
293513	93.16	1.917	11.997		48.8029	19.1892	243.347
293713	93.06	1.918	11.998		48.7505	19.1992	243.367
293913	92.72	1.919	11.994		48.5724	19.2092	243.286
294113	92.88	1.92	11.997		48.6562	19.2192	243.347
294313	93.24	1.92	11.999		48.8448	19.2192	243.387
294513	93.28	1.922	11.998		48.8658	19.2392	243.367
294713	93.06	1.923	12		48.7505	19.2492	243.408
294913	93.38	1.925	11.995		48.9182	19.2693	243.306
295113	93.38	1.925	11.996		48.9182	19.2693	243.327
295313	93.3	1.926	11.997		48.8763	19.2793	243.347
295513	93.12	1.927	11.998		48.782	19.2893	243.367
295713	93.46	1.928	11.998		48.9601	19.2993	243.367
295913	93.42	1.929	11.997		48.9391	19.3093	243.347
296113	93.3	1.929	11.998		48.8763	19.3093	243.367
296313	93.34	1.93	11.997		48.8972	19.3193	243.347
296513	93.36	1.932	11.998		48.9077	19.3393	243.367
296713	93.68	1.932	12		49.0753	19.3393	243.408
296913	93.68	1.934	11.996		49.0753	19.3594	243.327
297113	93.34	1.936	11.995		48.8972	19.3794	243.306
297313	93.7	1.936	12		49.0858	19.3794	243.408
297513	93.74	1.937	11.994		49.1068	19.3894	243.286
297713	93.74	1.938	11.997		49.1068	19.3994	243.347
297913	93.98	1.938	11.999		49.2325	19.3994	243.387
298113	93.82	1.94	11.996		49.1487	19.4194	243.327
298313	93.9	1.941	11.998		49.1906	19.4294	243.367
298513	93.92	1.942	11.997		49.201	19.4394	243.347
298713	93.7	1.943	11.997		49.0858	19.4494	243.347
298913	93.94	1.944	11.997		49.2115	19.4595	243.347
299113	94	1.944	11.994		49.243	19.4595	243.286
299313	94.06	1.946	11.997		49.2744	19.4795	243.347
299513	94.04	1.946	11.998		49.2639	19.4795	243.367
299713	94.04	1.947	11.997		49.2639	19.4895	243.347
299913	94.22	1.949	11.997		49.3582	19.5095	243.347
300113	94.24	1.95	11.995		49.3687	19.5195	243.306
300313	94.36	1.951	11.995		49.4315	19.5295	243.306
300513	94.32	1.952	11.995		49.4106	19.5395	243.306
300713	94.1	1.952	11.998		49.2953	19.5395	243.367
300913	94.36	1.954	11.994		49.4315	19.5596	243.286
301113	94.22	1.955	11.995		49.3582	19.5696	243.306
301313	94.48	1.955	11.997		49.4944	19.5696	243.347
301513	94.42	1.958	11.995		49.463	19.5996	243.306
301713	94.56	1.958	11.994		49.5363	19.5996	243.286
301913	94.4	1.959	11.994		49.4525	19.6096	243.286
302113	94.52	1.96	11.996		49.5154	19.6196	243.327
302313	94.52	1.961	11.997		49.5154	19.6296	243.347
302513	94.54	1.962	11.996		49.5258	19.6396	243.327
302713	94.62	1.962	11.999		49.5678	19.6396	243.387
302913	94.6	1.964	11.998		49.5573	19.6597	243.367
303113	94.74	1.965	11.996		49.6306	19.6697	243.327
303313	94.74	1.966	11.997		49.6306	19.6797	243.347
303513	94.74	1.966	11.996		49.6306	19.6797	243.327
303713	94.66	1.967	11.996		49.5887	19.6897	243.327
303913	94.64	1.969	11.996		49.5782	19.7097	243.327
304113	94.7	1.97	11.999		49.6097	19.7197	243.387
304313	94.84	1.971	11.999		49.683	19.7297	243.387
304513	94.84	1.972	11.996		49.683	19.7397	243.327
304713	95.02	1.973	11.996		49.7773	19.7497	243.327
304913	95.12	1.974	11.997		49.8297	19.7598	243.347
305113	94.86	1.976	11.996		49.6935	19.7798	243.327
305313	94.88	1.977	11.997		49.704	19.7898	243.347
305513	95.08	1.977	11.997		49.8087	19.7898	243.347
305713	95.06	1.978	11.998		49.7983	19.7998	243.367
305913	95.02	1.979	11.998		49.7773	19.8098	243.367
306113	95.04	1.98	11.997		49.7878	19.8198	243.347
306313	95.08	1.98	11.998		49.8087	19.8198	243.367
306513	95.36	1.982	11.996		49.9554	19.8398	243.327
306713	94.84	1.983	11.994		49.683	19.8498	243.286
306913	95.18	1.984	11.996		49.8611	19.8599	243.327
307113	95.3	1.985	12		49.924	19.8699	243.408
307313	95.26	1.986	11.997		49.903	19.8799	243.347
307513	95.44	1.987	11.997		49.9973	19.8899	243.347
307713	95.44	1.988	11.996		49.9973	19.8999	243.327
307913	95.46	1.988	11.999		50.0078	19.8999	243.387
308113	95.4	1.99	11.992		49.9764	19.9199	243.245
308313	95.36	1.992	11.996		49.9554	19.9399	243.327
308513	95.58	1.992	11.999		50.0707	19.9399	243.387
308713	95.5	1.993	11.998		50.0287	19.9499	243.367
308913	95.56	1.994	11.997		50.0602	19.96	243.347
309113	95.58	1.994	11.998		50.0707	19.96	243.367
309313	95.8	1.997	11.998		50.1859	19.99	243.367
309513	95.78	1.995	12		50.1754	19.97	243.408
309713	96.04	1.998	11.997		50.3116	20	243.347
309913	95.76	1.999	11.997		50.165	20.01	243.347
310113	95.84	1.999	11.998		50.2069	20.01	243.367
310313	95.72	2.001	11.994		50.144	20.03	243.286
310513	95.98	2.002	11.996		50.2802	20.04	243.327
310713	95.82	2.004	11.997		50.1964	20.0601	243.347
310913	95.9	2.004	11.996		50.2383	20.0601	243.327
311113	96	2.004	11.996		50.2907	20.0601	243.327
311313	96.04	2.006	11.996		50.3116	20.0801	243.327
311513	95.74	2.007	11.996		50.1545	20.0901	243.327
311713	95.74	2.008	11.996		50.1545	20.1001	243.327
311913	96.04	2.008	11.998		50.3116	20.1001	243.367
312113	96.16	2.009	11.997		50.3745	20.1101	243.347
312313	96.34	2.011	11.998		50.4688	20.1301	243.367
312513	96.36	2.012	11.995		50.4793	20.1401	243.306
312713	96.3	2.013	11.994		50.4478	20.1502	243.286
312913	96.36	2.014	11.997		50.4793	20.1602	243.347
313113	96.26	2.016	11.995		50.4269	20.1802	243.306
313313	96.38	2.016	11.998		50.4897	20.1802	243.367
313513	96.44	2.017	11.999		50.5212	20.1902	243.387
313713	96.44	2.018	11.998		50.5212	20.2002	243.367
313913	96.46	2.019	11.994		50.5317	20.2102	243.286
314113	96.48	2.02	11.997		50.5421	20.2202	243.347
314313	96.48	2.02	11.997		50.5421	20.2202	243.347
314513	96.62	2.022	11.996		50.6155	20.2402	243.327
314713	96.52	2.023	11.997		50.5631	20.2503	243.347
314913	96.54	2.024	11.996		50.5736	20.2603	243.327
315113	96.66	2.025	11.998		50.6364	20.2703	243.367
315313	96.74	2.025	11.998		50.6783	20.2703	243.367
315513	96.56	2.027	11.998		50.584	20.2903	243.367
315713	96.72	2.028	11.995		50.6679	20.3003	243.306
315913	96.58	2.028	11.998		50.5945	20.3003	243.367
316113	96.88	2.03	11.997		50.7517	20.3203	243.347
316313	96.62	2.032	12		50.6155	20.3403	243.408
316513	96.78	2.033	11.996		50.6993	20.3504	243.327
316713	96.78	2.033	11.996		50.6993	20.3504	243.327
316913	96.96	2.034	11.996		50.7936	20.3604	243.327
317113	97.06	2.035	11.996		50.846	20.3704	243.327
317313	97.08	2.036	11.995		50.8565	20.3804	243.306
317513	97.08	2.037	11.997		50.8565	20.3904	243.347
317713	97.22	2.037	11.999		50.9298	20.3904	243.387
317913	97.18	2.039	11.997		50.9088	20.4104	243.347
318113	97.22	2.04	11.996		50.9298	20.4204	243.327
318313	97.24	2.041	11.998		50.9403	20.4304	243.367
318513	97.2	2.041	11.997		50.9193	20.4304	243.347
318713	97.3	2.043	11.997		50.9717	20.4505	243.347
318913	97.36	2.044	11.996		51.0031	20.4605	243.327
319113	97.32	2.044	11.995		50.9822	20.4605	243.306
319313	97.3	2.046	11.997		50.9717	20.4805	243.347
319513	97.36	2.048	12		51.0031	20.5005	243.408
319713	97.42	2.047	11.996		51.0346	20.4905	243.327
319913	97.36	2.048	11.996		51.0031	20.5005	243.327
320113	97.46	2.049	11.996		51.0555	20.5105	243.327
320313	97.42	2.051	11.998		51.0346	20.5305	243.367
320513	97.52	2.052	11.995		51.0869	20.5405	243.306
320713	97.52	2.052	11.997		51.0869	20.5405	243.347
320913	97.76	2.054	11.996		51.2127	20.5606	243.327
321113	97.56	2.055	11.999		51.1079	20.5706	243.387
321313	97.6	2.056	11.998		51.1289	20.5806	243.367
321513	97.56	2.057	11.998		51.1079	20.5906	243.367
321713	97.68	2.058	11.998		51.1708	20.6006	243.367
321913	97.62	2.059	11.997		51.1393	20.6106	243.347
322113	97.72	2.06	11.996		51.1917	20.6206	243.327
322313	97.58	2.061	11.997		51.1184	20.6306	243.347
322513	97.84	2.062	11.995		51.2546	20.6406	243.306
322713	97.8	2.063	11.998		51.2336	20.6507	243.367
322913	97.9	2.064	11.998		51.286	20.6607	243.367
323113	97.94	2.064	11.996		51.307	20.6607	243.327
323313	97.96	2.066	11.996		51.3174	20.6807	243.327
323513	97.94	2.067	11.999		51.307	20.6907	243.387
323713	97.98	2.068	11.998		51.3279	20.7007	243.367
323913	97.98	2.069	11.999		51.3279	20.7107	243.387
324113	98.12	2.07	11.996		51.4013	20.7207	243.327
324313	98.06	2.072	11.995		51.3698	20.7407	243.306
324513	97.92	2.073	11.998		51.2965	20.7508	243.367
324713	98.16	2.073	11.998		51.4222	20.7508	243.367
324913	98.16	2.073	11.997		51.4222	20.7508	243.347
325113	98.3	2.076	11.999		51.4956	20.7808	243.387
325313	98.24	2.076	11.997		51.4641	20.7808	243.347
325513	98.38	2.076	11.999		51.5375	20.7808	243.387
325713	98.4	2.077	11.999		51.5479	20.7908	243.387
325913	98.36	2.079	11.997		51.527	20.8108	243.347
326113	98.4	2.079	11.997		51.5479	20.8108	243.347
326313	98.38	2.081	11.997		51.5375	20.8308	243.347
326513	98.38	2.082	11.997		51.5375	20.8408	243.347
326713	98.48	2.082	11.998		51.5899	20.8408	243.367
326913	98.46	2.084	11.997		51.5794	20.8609	243.347
327113	98.44	2.085	11.995		51.5689	20.8709	243.306
327313	98.62	2.086	11.999		51.6632	20.8809	243.387
327513	98.64	2.086	11.999		51.6737	20.8809	243.387
327713	98.74	2.088	11.996		51.7261	20.9009	243.327
327913	98.6	2.09	11.998		51.6527	20.9209	243.367
328113	98.72	2.09	11.997		51.7156	20.9209	243.347
328313	98.24	2.09	11.996		51.4641	20.9209	243.327
328513	98.74	2.091	11.997		51.7261	20.9309	243.347
328713	98.74	2.093	12		51.7261	20.951	243.408
328913	98.8	2.094	11.998		51.7575	20.961	243.367
329113	98.9	2.095	11.999		51.8099	20.971	243.387
329313	98.88	2.095	11.997		51.7994	20.971	243.347
329513	98.84	2.097	11.996		51.7784	20.991	243.327
329713	98.94	2.097	11.999		51.8308	20.991	243.387
329913	98.9	2.099	11.998		51.8099	21.011	243.367
330113	98.96	2.1	11.997		51.8413	21.021	243.347
330313	98.96	2.101	11.994		51.8413	21.031	243.286
330513	99.02	2.102	11.998		51.8727	21.041	243.367
330713	99	2.103	11.996		51.8623	21.0511	243.327
330913	99.16	2.104	11.996		51.9461	21.0611	243.327
331113	99.04	2.105	11.999		51.8832	21.0711	243.387
331313	99.12	2.106	12		51.9251	21.0811	243.408
331513	99.2	2.107	11.998		51.967	21.0911	243.367
331713	99.14	2.108	12		51.9356	21.1011	243.408
331913	99.26	2.109	11.998		51.9985	21.1111	243.367
332113	99.22	2.11	11.998		51.9775	21.1211	243.367
332313	99.36	2.111	11.997		52.0509	21.1311	243.347
332513	99.24	2.112	11.997		51.988	21.1411	243.347
332713	99.34	2.113	11.998		52.0404	21.1512	243.367
332913	99.5	2.114	11.994		52.1242	21.1612	243.286
333113	99.36	2.114	11.995		52.0509	21.1612	243.306
333313	99.44	2.116	11.996		52.0928	21.1812	243.327
333513	99.34	2.117	11.998		52.0404	21.1912	243.367
333713	99.44	2.118	11.998		52.0928	21.2012	243.367
333913	99.44	2.118	11.994		52.0928	21.2012	243.286
334113	99.56	2.119	11.998		52.1556	21.2112	243.367
334313	99.44	2.121	11.996		52.0928	21.2312	243.327
334513	99.44	2.122	11.998		52.0928	21.2412	243.367
334713	99.5	2.123	11.996		52.1242	21.2513	243.327
334913	99.68	2.124	11.995		52.2185	21.2613	243.306
335113	99.68	2.124	11.997		52.2185	21.2613	243.347
335313	99.76	2.126	11.996		52.2604	21.2813	243.327
335513	99.68	2.127	11.997		52.2185	21.2913	243.347
335713	99.7	2.128	11.998		52.229	21.3013	243.367
335913	99.7	2.128	11.998		52.229	21.3013	243.367
336113	99.88	2.129	11.997		52.3233	21.3113	243.347
336313	99.8	2.13	11.999		52.2814	21.3213	243.387
336513	99.82	2.132	11.996		52.2918	21.3413	243.327
336713	99.98	2.133	11.998		52.3756	21.3514	243.367
336913	99.92	2.134	11.997		52.3442	21.3614	243.347
337113	100.06	2.135	11.994		52.4176	21.3714	243.286
337313	100	2.136	11.995		52.3861	21.3814	243.306
337513	100.02	2.136	11.998		52.3966	21.3814	243.367
337713	100.02	2.137	11.998		52.3966	21.3914	243.367
337913	100.12	2.139	12		52.449	21.4114	243.408
338113	100.04	2.141	11.997		52.4071	21.4314	243.347
338313	100.24	2.14	11.998		52.5119	21.4214	243.367
338513	100.22	2.141	11.996		52.5014	21.4314	243.327
338713	100.22	2.143	11.996		52.5014	21.4515	243.327
338913	100.24	2.145	11.997		52.5119	21.4715	243.347
339113	100.34	2.144	11.996		52.5642	21.4615	243.327
339313	100.16	2.146	11.996		52.4699	21.4815	243.327
339513	100.34	2.146	11.998		52.5642	21.4815	243.367
339713	100.28	2.148	11.996		52.5328	21.5015	243.327
339913	100.3	2.149	11.995		52.5433	21.5115	243.306
340113	100.52	2.149	11.998		52.6585	21.5115	243.367
340313	100.5	2.15	11.998		52.6481	21.5215	243.367
340513	100.32	2.151	11.995		52.5538	21.5315	243.306
340713	100.56	2.153	11.997		52.6795	21.5516	243.347
340913	100.52	2.154	11.994		52.6585	21.5616	243.286
341113	100.44	2.155	11.994		52.6166	21.5716	243.286
341313	100.5	2.155	11.994		52.6481	21.5716	243.286
341513	100.66	2.156	11.998		52.7319	21.5816	243.367
341713	100.66	2.158	11.999		52.7319	21.6016	243.387
341913	100.68	2.159	11.996		52.7424	21.6116	243.327
342113	100.58	2.161	11.997		52.69	21.6316	243.347
342313	100.58	2.16	11.995		52.69	21.6216	243.306
342513	100.66	2.161	11.995		52.7319	21.6316	243.306
342713	100.82	2.163	11.998		52.8157	21.6517	243.367
342913	100.8	2.163	11.996		52.8052	21.6517	243.327
343113	100.94	2.164	11.998		52.8786	21.6617	243.367
343313	100.88	2.166	11.999		52.8471	21.6817	243.387
343513	100.74	2.167	12		52.7738	21.6917	243.408
343713	100.86	2.169	11.996		52.8366	21.7117	243.327
343913	100.8	2.168	12.002		52.8052	21.7017	243.448
344113	100.84	2.169	11.997		52.8262	21.7117	243.347
344313	100.86	2.171	11.996		52.8366	21.7317	243.327
344513	100.86	2.171	11.998		52.8366	21.7317	243.367
344713	101	2.172	11.999		52.91	21.7417	243.387
344913	101.06	2.174	11.997		52.9414	21.7618	243.347
345113	101.1	2.175	11.996		52.9624	21.7718	243.327
345313	101.22	2.175	11.997		53.0252	21.7718	243.347
345513	101.2	2.177	11.996		53.0148	21.7918	243.327
345713	101.22	2.177	11.996		53.0252	21.7918	243.327
345913	101.26	2.178	11.996		53.0462	21.8018	243.327
346113	101.28	2.18	11.998		53.0567	21.8218	243.367
346313	101.42	2.181	11.999		53.13	21.8318	243.387
346513	101.4	2.182	11.999		53.1195	21.8418	243.387
346713	101.38	2.183	12		53.1091	21.8519	243.408
346913	101.24	2.183	11.995		53.0357	21.8519	243.306
347113	101.5	2.185	11.999		53.1719	21.8719	243.387
347313	101.48	2.186	11.998		53.1614	21.8819	243.367
347513	101.58	2.187	11.997		53.2138	21.8919	243.347
347713	101.52	2.187	12		53.1824	21.8919	243.408
347913	101.52	2.188	11.997		53.1824	21.9019	243.347
348113	101.44	2.189	11.996		53.1405	21.9119	243.327
348313	101.5	2.191	11.998		53.1719	21.9319	243.367
348513	101.52	2.191	11.998		53.1824	21.9319	243.367
348713	101.64	2.192	11.999		53.2453	21.9419	243.387
348913	101.64	2.193	11.996		53.2453	21.952	243.327
349113	101.52	2.196	11.996		53.1824	21.982	243.327
349313	101.7	2.195	11.995		53.2767	21.972	243.306
349513	101.64	2.196	11.998		53.2453	21.982	243.367
349713	101.42	2.196	11.996		53.13	21.982	243.327
349913	101.62	2.198	11.996		53.2348	22.002	243.327
350113	101.8	2.199	11.998		53.3291	22.012	243.367
350313	101.68	2.2	11.998		53.2662	22.022	243.367
350513	101.64	2.201	11.998		53.2453	22.032	243.367
350713	101.68	2.202	11.997		53.2662	22.042	243.347
350913	101.88	2.203	11.996		53.371	22.0521	243.327
351113	101.86	2.205	11.998		53.3605	22.0721	243.367
351313	101.94	2.205	11.995		53.4024	22.0721	243.306
351513	101.86	2.206	11.996		53.3605	22.0821	243.327
351713	101.96	2.207	11.999		53.4129	22.0921	243.387
351913	102	2.209	11.996		53.4338	22.1121	243.327
352113	102.02	2.209	11.996		53.4443	22.1121	243.327
352313	101.94	2.21	11.998		53.4024	22.1221	243.367
352513	102.08	2.212	12		53.4758	22.1421	243.408
352713	101.96	2.212	11.995		53.4129	22.1421	243.306
352913	102.06	2.214	11.998		53.4653	22.1622	243.367
353113	102	2.214	11.997		53.4338	22.1622	243.347
353313	102.06	2.215	12		53.4653	22.1722	243.408
353513	102.16	2.216	11.998		53.5177	22.1822	243.367
353713	102.44	2.218	11.996		53.6643	22.2022	243.327
353913	102.2	2.219	11.996		53.5386	22.2122	243.327
354113	102.28	2.219	11.996		53.5805	22.2122	243.327
354313	102.26	2.22	11.999		53.5701	22.2222	243.387
354513	102.34	2.221	11.995		53.612	22.2322	243.306
354713	102.34	2.221	11.995		53.612	22.2322	243.306
354913	102.26	2.223	11.998		53.5701	22.2523	243.367
355113	102.54	2.225	11.994		53.7167	22.2723	243.286
355313	102.38	2.225	11.998		53.6329	22.2723	243.367
355513	102.48	2.226	11.996		53.6853	22.2823	243.327
355713	102.34	2.229	11.994		53.612	22.3123	243.286
355913	102.62	2.228	11.999		53.7586	22.3023	243.387
356113	102.54	2.229	11.999		53.7167	22.3123	243.387
356313	102.66	2.231	11.999		53.7796	22.3323	243.387
356513	102.56	2.231	12		53.7272	22.3323	243.408
356713	102.56	2.233	11.997		53.7272	22.3524	243.347
356913	102.52	2.232	11.998		53.7063	22.3423	243.367
357113	102.7	2.234	11.999		53.8006	22.3624	243.387
357313	102.7	2.235	11.999		53.8006	22.3724	243.387
357513	102.7	2.236	11.996		53.8006	22.3824	243.327
357713	102.64	2.237	11.997		53.7691	22.3924	243.347
357913	102.7	2.238	11.999		53.8006	22.4024	243.387
358113	102.76	2.239	11.997		53.832	22.4124	243.347
358313	102.48	2.241	11.996		53.6853	22.4324	243.327
358513	102.74	2.242	11.997		53.8215	22.4424	243.347
358713	102.84	2.242	11.998		53.8739	22.4424	243.367
358913	102.92	2.244	11.995		53.9158	22.4625	243.306
359113	102.98	2.244	11.997		53.9472	22.4625	243.347
359313	102.94	2.245	11.998		53.9263	22.4725	243.367
359513	103.06	2.246	12		53.9891	22.4825	243.408
359713	103.02	2.248	11.998		53.9682	22.5025	243.367
359913	103.04	2.248	11.997		53.9787	22.5025	243.347
360113	103.14	2.249	11.998		54.031	22.5125	243.367
360313	103.16	2.25	12		54.0415	22.5225	243.408
360513	103.22	2.251	11.996		54.073	22.5325	243.327
360713	103.08	2.252	11.996		53.9996	22.5425	243.327
360913	103.26	2.253	11.997		54.0939	22.5526	243.347
361113	103.34	2.255	11.999		54.1358	22.5726	243.387
361313	103.16	2.255	12.002		54.0415	22.5726	243.448
361513	103.34	2.256	11.999		54.1358	22.5826	243.387
361713	103.22	2.257	11.998		54.073	22.5926	243.367
361913	103.22	2.258	11.996		54.073	22.6026	243.327
362113	103.4	2.259	11.998		54.1673	22.6126	243.367
362313	103.36	2.261	11.998		54.1463	22.6326	243.367
362513	103.44	2.262	11.998		54.1882	22.6426	243.367
362713	103.32	2.262	11.996		54.1253	22.6426	243.327
362913	103.46	2.263	12		54.1987	22.6527	243.408
363113	103.54	2.264	11.998		54.2406	22.6627	243.367
363313	103.4	2.265	11.998		54.1673	22.6727	243.367
363513	103.4	2.266	11.998		54.1673	22.6827	243.367
363713	103.56	2.267	11.997		54.2511	22.6927	243.347
363913	103.54	2.268	11.998		54.2406	22.7027	243.367
364113	103.62	2.269	11.997		54.2825	22.7127	243.347
364313	103.24	2.27	11.996		54.0834	22.7227	243.327
364513	103.46	2.271	11.997		54.1987	22.7327	243.347
364713	103.66	2.273	11.998		54.3035	22.7528	243.367
364913	103.64	2.273	12		54.293	22.7528	243.408
365113	103.7	2.274	11.997		54.3244	22.7628	243.347
365313	103.76	2.275	11.996		54.3558	22.7728	243.327
365513	103.54	2.276	11.996		54.2406	22.7828	243.327
365713	103.86	2.277	11.997		54.4082	22.7928	243.347
365913	103.7	2.278	11.996		54.3244	22.8028	243.327
366113	103.82	2.279	11.996		54.3873	22.8128	243.327
366313	103.96	2.28	11.996		54.4606	22.8228	243.327
366513	103.46	2.281	11.998		54.1987	22.8328	243.367
366713	103.86	2.282	11.997		54.4082	22.8428	243.347
366913	103.84	2.283	11.997		54.3978	22.8529	243.347
367113	103.8	2.284	11.999		54.3768	22.8629	243.387
367313	103.86	2.286	11.998		54.4082	22.8829	243.367
367513	103.9	2.286	11.996		54.4292	22.8829	243.327
367713	104.08	2.287	12.002		54.5235	22.8929	243.448
367913	104	2.288	11.998		54.4816	22.9029	243.367
368113	104.02	2.289	11.997		54.492	22.9129	243.347
368313	104.06	2.29	11.998		54.513	22.9229	243.367
368513	104.12	2.291	11.996		54.5444	22.9329	243.327
368713	103.9	2.292	11.998		54.4292	22.9429	243.367
368913	104.22	2.293	11.998		54.5968	22.953	243.367
369113	104.2	2.295	11.998		54.5863	22.973	243.367
369313	104.16	2.295	12		54.5654	22.973	243.408
369513	104.28	2.295	11.996		54.6283	22.973	243.327
369713	104.18	2.297	11.995		54.5759	22.993	243.306
369913	104.22	2.298	11.998		54.5968	23.003	243.367
370113	104.28	2.3	11.998		54.6283	23.023	243.367
370313	104.36	2.3	11.998		54.6702	23.023	243.367
370513	104.34	2.301	11.996		54.6597	23.033	243.327
370713	104.42	2.302	11.997		54.7016	23.043	243.347
370913	104.38	2.303	11.995		54.6806	23.0531	243.306
371113	104.06	2.304	11.998		54.513	23.0631	243.367
371313	104.5	2.306	12		54.7435	23.0831	243.408
371513	104.4	2.306	11.995		54.6911	23.0831	243.306
371713	104.56	2.307	11.998		54.7749	23.0931	243.367
371913	104.48	2.309	11.998		54.733	23.1131	243.367
372113	104.52	2.308	11.999		54.754	23.1031	243.387
372313	104.6	2.311	11.999		54.7959	23.1331	243.387
372513	104.5	2.311	11.996		54.7435	23.1331	243.327
372713	104.6	2.312	11.998		54.7959	23.1431	243.367
372913	104.56	2.313	11.996		54.7749	23.1532	243.327
373113	104.68	2.313	11.998		54.8378	23.1532	243.367
373313	104.28	2.315	11.996		54.6283	23.1732	243.327
373513	104.28	2.315	11.996		54.6283	23.1732	243.327
373713	104.1	2.317	11.995		54.534	23.1932	243.306
373913	104.9	2.318	11.998		54.953	23.2032	243.367
374113	104.68	2.319	11.998		54.8378	23.2132	243.367
374313	104.9	2.32	12		54.953	23.2232	243.408
374513	104.74	2.321	11.994		54.8692	23.2332	243.286
374713	104.54	2.322	11.996		54.7645	23.2432	243.327
374913	104.56	2.324	11.996		54.7749	23.2633	243.327
375113	104.86	2.323	11.997		54.9321	23.2533	243.347
375313	104.76	2.324	11.996		54.8797	23.2633	243.327
375513	104.98	2.327	11.996		54.995	23.2933	243.327
375713	104.8	2.326	11.998		54.9007	23.2833	243.367
375913	104.92	2.329	11.998		54.9635	23.3133	243.367
376113	104.84	2.329	11.998		54.9216	23.3133	243.367
376313	105.24	2.33	11.999		55.1312	23.3233	243.387
376513	104.98	2.331	11.997		54.995	23.3333	243.347
376713	104.84	2.332	11.999		54.9216	23.3433	243.387
376913	105.1	2.333	11.998		55.0578	23.3534	243.367
377113	105.08	2.334	11.996		55.0473	23.3634	243.327
377313	105.22	2.335	11.998		55.1207	23.3734	243.367
377513	104.92	2.336	11.998		54.9635	23.3834	243.367
377713	104.98	2.337	11.998		54.995	23.3934	243.367
377913	105.12	2.338	11.998		55.0683	23.4034	243.367
378113	105.16	2.338	11.997		55.0892	23.4034	243.347
378313	105.26	2.34	11.997		55.1416	23.4234	243.347
378513	104.98	2.34	11.994		54.995	23.4234	243.286
378713	105.28	2.342	11.998		55.1521	23.4434	243.367
378913	105.42	2.344	11.994		55.2255	23.4635	243.286
379113	105.42	2.344	11.994		55.2255	23.4635	243.286
379313	105.48	2.344	11.994		55.2569	23.4635	243.286
379513	105.48	2.344	11.994		55.2569	23.4635	243.286
379713	105.46	2.347	11.996		55.2464	23.4935	243.327
379913	105.16	2.348	11.997		55.0892	23.5035	243.347
380113	105.4	2.349	11.997		55.215	23.5135	243.347
380313	105.5	2.35	11.997		55.2674	23.5235	243.347
380513	105.44	2.352	11.994		55.2359	23.5435	243.286
380713	105.36	2.353	11.998		55.194	23.5536	243.367
380913	105.42	2.353	11.996		55.2255	23.5536	243.327
381113	105.58	2.355	11.998		55.3093	23.5736	243.367
381313	105.5	2.356	11.997		55.2674	23.5836	243.347
381513	105.52	2.357	11.998		55.2778	23.5936	243.367
381713	105.56	2.357	11.998		55.2988	23.5936	243.367
381913	105.48	2.357	11.995		55.2569	23.5936	243.306
382113	105.52	2.36	11.998		55.2778	23.6236	243.367
382313	105.24	2.36	11.997		55.1312	23.6236	243.347
382513	105.26	2.361	11.998		55.1416	23.6336	243.367
382713	105.08	2.362	11.997		55.0473	23.6436	243.347
382913	105.78	2.363	11.999		55.414	23.6537	243.387
383113	105.28	2.364	11.996		55.1521	23.6637	243.327
383313	105.92	2.365	12		55.4874	23.6737	243.408
383513	105.96	2.366	11.998		55.5083	23.6837	243.367
383713	105.96	2.366	11.998		55.5083	23.6837	243.367
383913	105.62	2.368	12		55.3302	23.7037	243.408
384113	105.6	2.369	11.995		55.3197	23.7137	243.306
384313	105.94	2.369	11.998		55.4979	23.7137	243.367
384513	105.92	2.371	11.994		55.4874	23.7337	243.286
384713	105.82	2.373	11.999		55.435	23.7538	243.387
384913	106.2	2.373	11.999		55.6341	23.7538	243.387
385113	105.92	2.374	11.997		55.4874	23.7638	243.347
385313	106.16	2.376	11.999		55.6131	23.7838	243.387
385513	105.58	2.375	11.996		55.3093	23.7738	243.327
385713	105.8	2.377	11.997		55.4245	23.7938	243.347
385913	106.08	2.379	11.998		55.5712	23.8138	243.367
386113	105.9	2.379	11.998		55.4769	23.8138	243.367
386313	105.86	2.379	11.996		55.456	23.8138	243.327
386513	106.2	2.381	11.995		55.6341	23.8338	243.306
386713	106.18	2.382	12		55.6236	23.8438	243.408
386913	105.66	2.383	11.996		55.3512	23.8539	243.327
387113	106.16	2.383	11.996		55.6131	23.8539	243.327
387313	106.22	2.385	11.996		55.6445	23.8739	243.327
387513	105.8	2.385	11.998		55.4245	23.8739	243.367
387713	106.42	2.386	11.995		55.7493	23.8839	243.306
387913	106.16	2.388	11.996		55.6131	23.9039	243.327
388113	106.4	2.388	11.996		55.7388	23.9039	243.327
388313	106.22	2.39	11.996		55.6445	23.9239	243.327
388513	106.32	2.391	11.995		55.6969	23.9339	243.306
388713	105.86	2.392	11.999		55.456	23.9439	243.387
388913	106.22	2.394	11.997		55.6445	23.964	243.347
389113	106.54	2.394	11.995		55.8122	23.964	243.306
389313	106.54	2.394	11.995		55.8122	23.964	243.306
389513	106.5	2.395	11.993		55.7912	23.974	243.266
389713	106.04	2.396	11.996		55.5502	23.984	243.327
389913	106.12	2.397	12		55.5922	23.994	243.408
390113	106.54	2.399	11.995		55.8122	24.014	243.306
390313	105.86	2.4	11.997		55.456	24.024	243.347
390513	106.16	2.4	11.994		55.6131	24.024	243.286
390713	105.94	2.402	12		55.4979	24.044	243.408
390913	105.94	2.402	12		55.4979	24.044	243.408
391113	105.86	2.403	11.997		55.456	24.0541	243.347
391313	106.24	2.404	11.999		55.655	24.0641	243.387
391513	106.26	2.406	11.995		55.6655	24.0841	243.306
391713	106.44	2.408	11.995		55.7598	24.1041	243.306
391913	106.12	2.408	11.994		55.5922	24.1041	243.286
392113	106.12	2.408	11.997		55.5922	24.1041	243.347
392313	106.64	2.41	11.999		55.8646	24.1241	243.387
392513	106.48	2.411	11.996		55.7807	24.1341	243.327
392713	106.28	2.412	11.998		55.676	24.1441	243.367
392913	106.88	2.414	11.995		55.9903	24.1642	243.306
393113	106.74	2.414	11.996		55.917	24.1642	243.327
393313	106.42	2.415	11.995		55.7493	24.1742	243.306
393513	107	2.416	11.994		56.0532	24.1842	243.286
393713	106.5	2.416	11.996		55.7912	24.1842	243.327
393913	106.88	2.417	11.998		55.9903	24.1942	243.367
394113	106.86	2.419	11.998		55.9798	24.2142	243.367
394313	106.84	2.42	11.996		55.9693	24.2242	243.327
394513	106.86	2.42	11.997		55.9798	24.2242	243.347
394713	106.62	2.421	11.996		55.8541	24.2342	243.327
394913	107	2.423	11.996		56.0532	24.2543	243.327
395113	106.14	2.424	11.996		55.6026	24.2643	243.327
395313	106.58	2.425	11.994		55.8331	24.2743	243.286
395513	107	2.426	11.998		56.0532	24.2843	243.367
395713	106.94	2.427	11.996		56.0217	24.2943	243.327
395913	106.94	2.427	11.996		56.0217	24.2943	243.327
396113	106.9	2.428	11.995		56.0008	24.3043	243.306
396313	106.52	2.429	11.996		55.8017	24.3143	243.327
396513	106.36	2.43	11.996		55.7179	24.3243	243.327
396713	106.66	2.433	11.998		55.875	24.3544	243.367
[truncated: 5,590 more rows]

## Sheet: GB-5-15
Force (large)	--	journey	) Results Report
17:21:53,06/23/2019
Diameter: 49.3	mm	Height: 99.9	mm
Vertical force transducer (Test piece vertical force)
Control mode: force/confining pressure	Waveform: Slope
KN/s	Force the finish: 17.880	KN	Confining pressure rate :0.500	MPa/s	End point of confining pressure 15.0050	MPa
Time (ms)	Vertical force (KN)	Vertical deformation (mm)	Confining pressure (MPa)		stress	Axial strain	Lateral strain
0	0	0	0		0	0	0
200	0	-0.001	0.001		0	-0.01001	0.020284
401	0.16	0	0.003		0.0838178	0	0.0608519
601	0.4	0	0.013		0.209545	0	0.263692
801	0.56	0	0.021		0.293362	0	0.425963
1003	0.74	0	0.025		0.387657	0	0.507099
1204	0.8	0	0.044		0.419089	0	0.892495
1404	1	0.006	0.063		0.523861	0.0600601	1.27789
1605	1.08	0.014	0.089		0.56577	0.14014	1.80527
1805	1.28	0.026	0.133		0.670542	0.26026	2.69777
2005	1.48	0.041	0.177		0.775315	0.41041	3.59026
2206	1.64	0.056	0.22		0.859132	0.560561	4.46247
2406	1.98	0.077	0.264		1.03725	0.770771	5.35497
2607	2.28	0.096	0.301		1.1944	0.960961	6.10548
2807	2.46	0.116	0.338		1.2887	1.16116	6.85598
3007	2.78	0.135	0.368		1.45633	1.35135	7.4645
3208	2.9	0.154	0.388		1.5192	1.54154	7.87018
3408	3.24	0.167	0.403		1.69731	1.67167	8.17444
3609	3.36	0.176	0.42		1.76017	1.76176	8.51927
3809	3.52	0.183	0.439		1.84399	1.83183	8.90467
4009	3.82	0.19	0.461		2.00115	1.9019	9.35091
4211	3.9	0.199	0.487		2.04306	1.99199	9.8783
4412	4.08	0.206	0.53		2.13735	2.06206	10.7505
4612	4.3	0.213	0.599		2.2526	2.13213	12.1501
4813	4.4	0.22	0.708		2.30499	2.2022	14.3611
5013	4.52	0.227	0.896		2.36785	2.27227	18.1744
5213	4.82	0.233	1.286		2.52501	2.33233	26.0852
5414	5.12	0.242	2.019		2.68217	2.42242	40.9533
5614	5.52	0.25	2.479		2.89171	2.5025	50.284
5815	5.52	0.255	2.589		2.89171	2.55255	52.5152
6015	5.66	0.256	2.913		2.96505	2.56256	59.0872
6215	5.66	0.257	3.113		2.96505	2.57257	63.144
6416	6.02	0.259	3.171		3.15364	2.59259	64.3205
6616	6.28	0.269	3.265		3.28985	2.69269	66.2272
6817	6.42	0.271	3.367		3.36319	2.71271	68.2961
7017	6.8	0.277	3.466		3.56226	2.77277	70.3043
7217	7.08	0.284	3.568		3.70894	2.84284	72.3732
7419	7.2	0.293	3.668		3.7718	2.93293	74.4016
7620	7.26	0.297	3.769		3.80323	2.97297	76.4503
7820	7.48	0.295	3.869		3.91848	2.95295	78.4787
8021	7.68	0.304	3.97		4.02325	3.04304	80.5274
8221	7.86	0.303	4.072		4.11755	3.03303	82.5963
8421	8.04	0.31	4.171		4.21184	3.1031	84.6045
8622	8.06	0.312	4.27		4.22232	3.12312	86.6126
8822	8.32	0.318	4.372		4.35853	3.18318	88.6815
9023	8.5	0.323	4.472		4.45282	3.23323	90.7099
9223	8.74	0.329	4.572		4.57855	3.29329	92.7383
9423	9.06	0.329	4.67		4.74618	3.29329	94.7262
9624	9.24	0.336	4.767		4.84048	3.36336	96.6937
9824	9.64	0.345	4.868		5.05002	3.45345	98.7424
10025	9.82	0.35	4.971		5.14432	3.5035	100.832
10225	9.96	0.355	5.07		5.21766	3.55355	102.84
10425	10.1	0.358	5.173		5.291	3.58358	104.929
10627	10.26	0.361	5.271		5.37482	3.61361	106.917
10828	10.46	0.364	5.37		5.47959	3.64364	108.925
11028	10.92	0.373	5.471		5.72056	3.73373	110.974
11229	10.9	0.376	5.571		5.71009	3.76376	113.002
11429	11	0.378	5.671		5.76247	3.78378	115.03
11629	11.12	0.38	5.774		5.82534	3.8038	117.12
11830	11.38	0.384	5.866		5.96154	3.84384	118.986
12030	11.76	0.389	5.977		6.16061	3.89389	121.237
12231	12.16	0.396	6.076		6.37015	3.96396	123.245
12431	12.16	0.398	6.173		6.37015	3.98398	125.213
12631	12.12	0.397	6.272		6.3492	3.97397	127.221
12832	12.4	0.402	6.374		6.49588	4.02402	129.29
13032	12.7	0.406	6.475		6.65304	4.06406	131.339
13233	13	0.412	6.575		6.8102	4.12412	133.367
13433	13.3	0.415	6.673		6.96735	4.15415	135.355
13633	13.4	0.421	6.774		7.01974	4.21421	137.404
13835	13.48	0.422	6.875		7.06165	4.22422	139.452
14036	13.64	0.424	6.979		7.14547	4.24424	141.562
14236	13.74	0.426	7.075		7.19785	4.26426	143.509
14437	14.06	0.428	7.177		7.36549	4.28428	145.578
14637	14.46	0.436	7.272		7.57503	4.36436	147.505
14837	14.76	0.437	7.374		7.73219	4.37437	149.574
15038	14.64	0.444	7.477		7.66933	4.44444	151.663
15238	14.78	0.444	7.576		7.74267	4.44444	153.671
15439	15	0.445	7.676		7.85792	4.45445	155.7
15639	15.14	0.45	7.777		7.93126	4.5045	157.748
15839	15.52	0.455	7.876		8.13033	4.55455	159.757
16040	15.8	0.458	7.978		8.27701	4.58458	161.826
16240	16.12	0.465	8.074		8.44464	4.65465	163.773
16441	16.04	0.468	8.178		8.40273	4.68468	165.882
16641	16.2	0.469	8.278		8.48655	4.69469	167.911
16841	16.38	0.47	8.378		8.58085	4.7047	169.939
17043	16.58	0.474	8.483		8.68562	4.74474	172.069
17244	16.94	0.477	8.583		8.87421	4.77477	174.097
17444	17.2	0.481	8.681		9.01041	4.81481	176.085
17645	17.54	0.483	8.779		9.18853	4.83483	178.073
17845	17.58	0.491	8.881		9.20948	4.91491	180.142
18045	17.7	0.494	8.982		9.27234	4.94494	182.191
18246	17.74	0.493	9.08		9.2933	4.93493	184.178
18446	18.04	0.497	9.183		9.45046	4.97497	186.268
18647	18.32	0.501	9.28		9.59714	5.01502	188.235
18847	18.7	0.507	9.379		9.79621	5.07508	190.243
19047	18.58	0.508	9.48		9.73334	5.08509	192.292
19248	18.8	0.51	9.583		9.84859	5.10511	194.381
19448	19.06	0.512	9.682		9.9848	5.12513	196.389
19649	19.26	0.516	9.78		10.0896	5.16517	198.377
19849	19.64	0.52	9.884		10.2886	5.20521	200.487
20049	19.8	0.522	9.983		10.3725	5.22523	202.495
20250	20.08	0.528	10.082		10.5191	5.28529	204.503
20450	20.26	0.532	10.179		10.6134	5.32533	206.471
20651	20.44	0.536	10.283		10.7077	5.36537	208.58
20851	20.38	0.537	10.379		10.6763	5.37538	210.527
21051	20.54	0.537	10.479		10.7601	5.37538	212.556
21253	20.86	0.54	10.582		10.9277	5.40541	214.645
21454	21.28	0.546	10.682		11.1478	5.46547	216.673
21654	21.34	0.545	10.784		11.1792	5.45546	218.742
21855	21.42	0.55	10.883		11.2211	5.50551	220.751
22055	21.62	0.551	10.982		11.3259	5.51552	222.759
22255	21.76	0.553	11.082		11.3992	5.53554	224.787
22456	22.16	0.559	11.183		11.6088	5.5956	226.836
22656	22.46	0.564	11.284		11.7659	5.64565	228.884
22857	22.52	0.567	11.384		11.7974	5.67568	230.913
23057	22.62	0.57	11.484		11.8497	5.70571	232.941
23257	22.78	0.57	11.584		11.9336	5.70571	234.97
23458	23.22	0.575	11.69		12.1641	5.75576	237.12
23658	23.52	0.579	11.787		12.3212	5.7958	239.087
23859	23.56	0.583	11.884		12.3422	5.83584	241.055
24059	23.92	0.585	11.986		12.5308	5.85586	243.124
24259	23.92	0.587	12.087		12.5308	5.87588	245.172
24461	24.04	0.59	12.187		12.5936	5.90591	247.201
24662	24.26	0.593	12.288		12.7089	5.93594	249.249
24862	24.5	0.594	12.387		12.8346	5.94595	251.258
25063	24.58	0.597	12.492		12.8765	5.97598	253.387
25263	24.78	0.6	12.59		12.9813	6.00601	255.375
25463	25.22	0.603	12.691		13.2118	6.03604	257.424
25664	25.46	0.604	12.788		13.3375	6.04605	259.391
25864	25.8	0.611	12.891		13.5156	6.11612	261.481
26065	25.76	0.613	12.99		13.4947	6.13614	263.489
26265	25.88	0.616	13.09		13.5575	6.16617	265.517
26465	26.02	0.618	13.191		13.6309	6.18619	267.566
26666	26.16	0.619	13.287		13.7042	6.1962	269.513
26866	26.48	0.621	13.383		13.8718	6.21622	271.46
27067	26.86	0.626	13.489		14.0709	6.26627	273.611
27267	27.1	0.631	13.589		14.1966	6.31632	275.639
27467	27.18	0.632	13.689		14.2385	6.32633	277.667
27669	27.1	0.633	13.785		14.1966	6.33634	279.615
27870	27.46	0.635	13.889		14.3852	6.35636	281.724
28070	27.8	0.64	13.99		14.5633	6.40641	283.773
28271	28.1	0.644	14.092		14.7205	6.44645	285.842
28471	28.3	0.647	14.191		14.8253	6.47648	287.85
28671	28.44	0.651	14.289		14.8986	6.51652	289.838
28872	28.54	0.654	14.391		14.951	6.54655	291.907
29072	28.72	0.655	14.491		15.0453	6.55656	293.935
29273	28.68	0.657	14.589		15.0243	6.57658	295.923
29473	29.08	0.659	14.689		15.2339	6.5966	297.951
29673	29.26	0.662	14.791		15.3282	6.62663	300.02
29874	29.54	0.665	14.888		15.4749	6.65666	301.988
30074	29.72	0.669	14.99		15.5692	6.6967	304.057
30275	29.9	0.671	15.005		15.6635	6.71672	304.361
控制模式:围压	波形:斜坡					0
MPa/s	终点:15.0030	MPa				#VALUE!
时间(ms)	垂直力(KN)	垂直变形(mm)	围压(MPa)			#VALUE!
30316	29.98	0.673	15.003		15.7054	6.73674	304.32
控制模式:行程	波形:斜坡					0
mm/s	终点:5.8470	mm				#VALUE!
时间(ms)	垂直力(KN)	垂直变形(mm)	围压(MPa)			#VALUE!
30334	29.88	0.673	14.997		15.653	6.73674	304.199
30435	29.88	0.673	14.997		15.653	6.73674	304.199
30536	30.16	0.671	14.982		15.7997	6.71672	303.895
30637	29.32	0.677	14.973		15.3596	6.77678	303.712
30738	29.32	0.677	14.973		15.3596	6.77678	303.712
30839	30.14	0.676	14.98		15.7892	6.76677	303.854
30939	30	0.679	14.978		15.7158	6.7968	303.813
31040	30	0.679	14.978		15.7158	6.7968	303.813
31141	30.26	0.679	14.979		15.852	6.7968	303.834
31242	30.58	0.683	14.978		16.0197	6.83684	303.813
31343	30.06	0.683	14.979		15.7473	6.83684	303.834
31443	30.4	0.682	14.979		15.9254	6.82683	303.834
31545	30.6	0.685	14.979		16.0302	6.85686	303.834
31645	30.42	0.686	14.979		15.9359	6.86687	303.834
31746	30.12	0.686	14.977		15.7787	6.86687	303.793
31847	30.72	0.687	14.977		16.093	6.87688	303.793
31948	30.9	0.69	14.978		16.1873	6.90691	303.813
32049	30.52	0.69	14.975		15.9882	6.90691	303.753
32149	30.52	0.69	14.975		15.9882	6.90691	303.753
32250	31.24	0.691	14.981		16.3654	6.91692	303.874
32351	30.86	0.694	14.976		16.1664	6.94695	303.773
32452	30.86	0.694	14.976		16.1664	6.94695	303.773
32553	31.3	0.692	14.979		16.3969	6.92693	303.834
32654	31.6	0.699	14.978		16.554	6.997	303.813
32755	31.6	0.699	14.978		16.554	6.997	303.813
32855	31.56	0.697	14.983		16.5331	6.97698	303.915
32956	30.04	0.701	14.977		15.7368	7.01702	303.793
33057	30.04	0.701	14.977		15.7368	7.01702	303.793
33158	31.38	0.699	14.98		16.4388	6.997	303.854
33259	31.42	0.702	14.977		16.4597	7.02703	303.793
33359	31.42	0.702	14.977		16.4597	7.02703	303.793
33461	31.8	0.703	14.977		16.6588	7.03704	303.793
33561	31.84	0.705	14.979		16.6797	7.05706	303.834
33662	31.84	0.705	14.979		16.6797	7.05706	303.834
33763	31.84	0.706	14.981		16.6797	7.06707	303.874
33864	32.1	0.708	14.982		16.8159	7.08709	303.895
33965	31.24	0.709	14.977		16.3654	7.0971	303.793
34065	31.2	0.708	14.978		16.3445	7.08709	303.813
34166	31.2	0.708	14.978		16.3445	7.08709	303.813
34267	31.58	0.712	14.978		16.5435	7.12713	303.813
34368	31.58	0.712	14.978		16.5435	7.12713	303.813
34469	32.46	0.714	14.978		17.0045	7.14715	303.813
34570	32.02	0.717	14.975		16.774	7.17718	303.753
34671	32.02	0.717	14.975		16.774	7.17718	303.753
34771	32.64	0.717	14.981		17.0988	7.17718	303.874
34872	32.66	0.718	14.975		17.1093	7.18719	303.753
34973	32.54	0.719	14.979		17.0464	7.1972	303.834
35074	32.8	0.719	14.979		17.1826	7.1972	303.834
35175	32.78	0.721	14.977		17.1722	7.21722	303.793
35275	32.82	0.722	14.981		17.1931	7.22723	303.874
35377	32.9	0.722	14.978		17.235	7.22723	303.813
35477	33.04	0.724	14.98		17.3084	7.24725	303.854
35578	33.14	0.726	14.979		17.3608	7.26727	303.834
35679	32.44	0.726	14.979		16.9941	7.26727	303.834
35780	32.44	0.726	14.979		16.9941	7.26727	303.834
35881	33.16	0.727	14.983		17.3712	7.27728	303.915
35981	33.54	0.729	14.979		17.5703	7.2973	303.834
36082	32.14	0.73	14.978		16.8369	7.30731	303.813
36183	31.92	0.729	14.979		16.7217	7.2973	303.834
36284	31.92	0.729	14.979		16.7217	7.2973	303.834
36385	31.92	0.729	14.979		16.7217	7.2973	303.834
36485	31.96	0.731	14.979		16.7426	7.31732	303.834
36587	31.96	0.731	14.979		16.7426	7.31732	303.834
36687	31.96	0.731	14.979		16.7426	7.31732	303.834
36788	32.5	0.736	14.978		17.0255	7.36737	303.813
36889	33.92	0.737	14.98		17.7694	7.37738	303.854
36990	34.06	0.739	14.978		17.8427	7.3974	303.813
37091	32.92	0.74	14.975		17.2455	7.40741	303.753
37191	32.64	0.739	14.979		17.0988	7.3974	303.834
37292	34.3	0.742	14.978		17.9684	7.42743	303.813
37393	33.84	0.744	14.976		17.7275	7.44745	303.773
37494	33.84	0.744	14.976		17.7275	7.44745	303.773
37595	33.86	0.743	14.979		17.7379	7.43744	303.834
37696	33.86	0.743	14.979		17.7379	7.43744	303.834
37797	33.24	0.747	14.976		17.4131	7.47748	303.773
37897	33.24	0.747	14.976		17.4131	7.47748	303.773
37998	34.64	0.748	14.978		18.1466	7.48749	303.813
38099	34.68	0.751	14.979		18.1675	7.51752	303.834
38200	34.68	0.751	14.979		18.1675	7.51752	303.834
38301	34.68	0.751	14.979		18.1675	7.51752	303.834
38401	35	0.755	14.981		18.3351	7.55756	303.874
38503	33.32	0.754	14.977		17.4551	7.54755	303.793
38603	33.66	0.754	14.979		17.6332	7.54755	303.834
38704	33.66	0.754	14.979		17.6332	7.54755	303.834
38805	33.98	0.758	14.981		17.8008	7.58759	303.874
38906	33.84	0.756	14.983		17.7275	7.56757	303.915
39007	35.22	0.759	14.982		18.4504	7.5976	303.895
39107	34.76	0.761	14.979		18.2094	7.61762	303.834
39208	34.36	0.76	14.977		17.9999	7.60761	303.793
39309	35.46	0.762	14.979		18.5761	7.62763	303.834
39410	35.4	0.765	14.976		18.5447	7.65766	303.773
39511	35.4	0.765	14.976		18.5447	7.65766	303.773
39612	35.26	0.765	14.978		18.4713	7.65766	303.813
39713	35.26	0.765	14.978		18.4713	7.65766	303.813
39813	34.86	0.768	14.976		18.2618	7.68769	303.773
39914	34.86	0.768	14.976		18.2618	7.68769	303.773
40015	35.94	0.768	14.981		18.8276	7.68769	303.874
40116	35.96	0.771	14.977		18.8381	7.71772	303.793
40217	35.96	0.771	14.977		18.8381	7.71772	303.793
40317	35.74	0.77	14.981		18.7228	7.70771	303.874
40419	36.02	0.775	14.98		18.8695	7.75776	303.854
40519	36.02	0.775	14.98		18.8695	7.75776	303.854
40620	35.9	0.775	14.983		18.8066	7.75776	303.915
40721	36.38	0.777	14.979		19.0581	7.77778	303.834
40822	36.38	0.777	14.979		19.0581	7.77778	303.834
40923	36.38	0.777	14.979		19.0581	7.77778	303.834
41023	36.52	0.781	14.978		19.1314	7.81782	303.813
41124	36.52	0.781	14.978		19.1314	7.81782	303.813
41225	36.36	0.779	14.979		19.0476	7.7978	303.834
41326	36.7	0.784	14.979		19.2257	7.84785	303.834
41427	36.7	0.784	14.979		19.2257	7.84785	303.834
41528	36.62	0.783	14.981		19.1838	7.83784	303.874
41629	36.84	0.786	14.977		19.299	7.86787	303.793
41729	36.84	0.786	14.977		19.299	7.86787	303.793
41830	36.84	0.786	14.977		19.299	7.86787	303.793
41931	37.16	0.789	14.981		19.4667	7.8979	303.874
42032	35.94	0.79	14.977		18.8276	7.90791	303.793
42133	35.44	0.789	14.979		18.5656	7.8979	303.834
42233	37.08	0.791	14.977		19.4248	7.91792	303.793
42334	37.34	0.793	14.98		19.561	7.93794	303.854
42435	36.36	0.794	14.979		19.0476	7.94795	303.834
42536	35.98	0.793	14.981		18.8485	7.93794	303.874
42637	37.58	0.795	14.983		19.6867	7.95796	303.915
42738	37.3	0.798	14.978		19.54	7.98799	303.813
42839	37.3	0.798	14.978		19.54	7.98799	303.813
42939	37.6	0.797	14.979		19.6972	7.97798	303.834
43040	37.7	0.801	14.976		19.7496	8.01802	303.773
43141	37.7	0.801	14.976		19.7496	8.01802	303.773
43242	37.52	0.799	14.981		19.6553	7.998	303.874
43343	37.96	0.804	14.981		19.8858	8.04805	303.874
43443	37.46	0.804	14.979		19.6238	8.04805	303.834
43545	36.96	0.804	14.978		19.3619	8.04805	303.813
43645	38.02	0.804	14.981		19.9172	8.04805	303.874
43746	38.22	0.808	14.98		20.022	8.08809	303.854
43847	37.92	0.808	14.978		19.8648	8.08809	303.813
43948	37.92	0.808	14.978		19.8648	8.08809	303.813
44049	38.38	0.808	14.98		20.1058	8.08809	303.854
44149	38.14	0.813	14.977		19.9801	8.13814	303.793
44250	38.14	0.813	14.977		19.9801	8.13814	303.793
44351	38.34	0.812	14.975		20.0848	8.12813	303.753
44452	38.42	0.815	14.978		20.1267	8.15816	303.813
44553	38.42	0.815	14.978		20.1267	8.15816	303.813
44654	38.3	0.814	14.98		20.0639	8.14815	303.854
44755	38.3	0.814	14.98		20.0639	8.14815	303.854
44855	37.7	0.817	14.979		19.7496	8.17818	303.834
44956	38.16	0.817	14.979		19.9905	8.17818	303.834
45057	38.16	0.817	14.979		19.9905	8.17818	303.834
45158	38.44	0.822	14.978		20.1372	8.22823	303.813
45259	38.44	0.822	14.978		20.1372	8.22823	303.813
45359	39.14	0.821	14.979		20.5039	8.21822	303.834
45461	39.22	0.826	14.979		20.5458	8.26827	303.834
45561	39.22	0.826	14.979		20.5458	8.26827	303.834
45662	38.88	0.824	14.981		20.3677	8.24825	303.874
45763	38.88	0.824	14.981		20.3677	8.24825	303.874
45864	38.88	0.824	14.981		20.3677	8.24825	303.874
45965	39.3	0.827	14.981		20.5877	8.27828	303.874
46065	39.68	0.83	14.981		20.7868	8.30831	303.874
46166	39.36	0.831	14.978		20.6192	8.31832	303.813
46267	39.36	0.831	14.978		20.6192	8.31832	303.813
46368	39.76	0.832	14.978		20.8287	8.32833	303.813
46469	39.94	0.835	14.978		20.923	8.35836	303.813
46570	39.06	0.834	14.973		20.462	8.34835	303.712
46671	38.92	0.834	14.979		20.3887	8.34835	303.834
46771	38.92	0.834	14.979		20.3887	8.34835	303.834
46872	39.12	0.839	14.976		20.4935	8.3984	303.773
46973	39.12	0.839	14.976		20.4935	8.3984	303.773
47074	40.26	0.839	14.98		21.0907	8.3984	303.854
47175	40.06	0.842	14.98		20.9859	8.42843	303.854
47275	40.06	0.842	14.98		20.9859	8.42843	303.854
47377	40.2	0.842	14.979		21.0592	8.42843	303.834
47477	40.56	0.845	14.979		21.2478	8.45846	303.834
47578	39.78	0.845	14.977		20.8392	8.45846	303.793
47679	39.78	0.845	14.977		20.8392	8.45846	303.793
47780	40.72	0.846	14.98		21.3316	8.46847	303.854
47881	40.4	0.849	14.979		21.164	8.4985	303.834
47981	40.4	0.849	14.979		21.164	8.4985	303.834
48082	40.76	0.849	14.981		21.3526	8.4985	303.874
48183	40.92	0.852	14.979		21.4364	8.52853	303.834
48284	40.92	0.852	14.979		21.4364	8.52853	303.834
48385	40.62	0.851	14.981		21.2792	8.51852	303.874
48485	40.62	0.851	14.981		21.2792	8.51852	303.874
48587	40.22	0.855	14.975		21.0697	8.55856	303.753
48687	40.22	0.855	14.975		21.0697	8.55856	303.753
48788	41.24	0.856	14.981		21.604	8.56857	303.874
48889	41.28	0.859	14.979		21.625	8.5986	303.834
48990	40.14	0.858	14.978		21.0278	8.58859	303.813
49091	40.16	0.858	14.978		21.0383	8.58859	303.813
49191	40.16	0.858	14.978		21.0383	8.58859	303.813
49292	40.54	0.863	14.977		21.2373	8.63864	303.793
49393	40.04	0.86	14.977		20.9754	8.60861	303.793
49494	41.74	0.864	14.98		21.866	8.64865	303.854
49595	41.4	0.866	14.98		21.6879	8.66867	303.854
49696	41.4	0.866	14.98		21.6879	8.66867	303.854
49797	41.68	0.865	14.979		21.8345	8.65866	303.834
49897	42.06	0.87	14.98		22.0336	8.70871	303.854
49998	40.3	0.869	14.979		21.1116	8.6987	303.834
50099	40.4	0.868	14.979		21.164	8.68869	303.834
50200	40.4	0.868	14.979		21.164	8.68869	303.834
50301	40.82	0.872	14.981		21.384	8.72873	303.874
50401	40.4	0.871	14.976		21.164	8.71872	303.773
50503	42.32	0.874	14.978		22.1698	8.74875	303.813
50603	42.26	0.876	14.98		22.1384	8.76877	303.854
50704	42.26	0.876	14.98		22.1384	8.76877	303.854
50805	42.16	0.876	14.978		22.086	8.76877	303.813
50906	42.42	0.88	14.978		22.2222	8.80881	303.813
51007	42.42	0.88	14.978		22.2222	8.80881	303.813
51107	42.42	0.878	14.981		22.2222	8.78879	303.874
51208	42.64	0.882	14.979		22.3374	8.82883	303.834
51309	41.7	0.882	14.975		21.845	8.82883	303.753
51410	41.82	0.881	14.981		21.9079	8.81882	303.874
51511	42.96	0.883	14.979		22.5051	8.83884	303.834
51612	42.52	0.886	14.977		22.2746	8.86887	303.793
51713	42.52	0.886	14.977		22.2746	8.86887	303.793
51813	42.78	0.886	14.983		22.4108	8.86887	303.915
51914	43.24	0.889	14.979		22.6518	8.8989	303.834
52015	42.4	0.89	14.975		22.2117	8.90891	303.753
52116	42.4	0.89	14.975		22.2117	8.90891	303.753
52217	43.26	0.89	14.98		22.6622	8.90891	303.854
52317	43.3	0.893	14.979		22.6832	8.93894	303.834
52419	43.3	0.893	14.979		22.6832	8.93894	303.834
52519	43.28	0.894	14.979		22.6727	8.94895	303.834
52620	43.56	0.896	14.985		22.8194	8.96897	303.955
52721	42.12	0.896	14.976		22.065	8.96897	303.773
52822	42.52	0.895	14.98		22.2746	8.95896	303.854
52923	43.86	0.898	14.979		22.9766	8.98899	303.834
53023	43.88	0.901	14.975		22.987	9.01902	303.753
53124	43.88	0.901	14.975		22.987	9.01902	303.753
53225	43.44	0.899	14.979		22.7565	8.999	303.834
53326	43.44	0.899	14.979		22.7565	8.999	303.834
53427	43.5	0.904	14.974		22.788	9.04905	303.732
53528	43.5	0.904	14.974		22.788	9.04905	303.732
53629	44.06	0.903	14.983		23.0813	9.03904	303.915
53729	44.42	0.908	14.98		23.2699	9.08909	303.854
53830	42.74	0.907	14.979		22.3898	9.07908	303.834
53931	42.72	0.906	14.979		22.3794	9.06907	303.834
54032	42.72	0.906	14.979		22.3794	9.06907	303.834
54133	43.48	0.91	14.978		22.7775	9.10911	303.813
54233	43.42	0.91	14.98		22.7461	9.10911	303.854
54334	44.62	0.913	14.979		23.3747	9.13914	303.834
54435	44.7	0.913	14.978		23.4166	9.13914	303.813
54536	44.62	0.914	14.977		23.3747	9.14915	303.793
54637	44.62	0.914	14.977		23.3747	9.14915	303.793
54738	44.86	0.916	14.978		23.5004	9.16917	303.813
54839	44.58	0.917	14.979		23.3537	9.17918	303.834
54939	44.56	0.918	14.977		23.3433	9.18919	303.793
55040	44.8	0.918	14.981		23.469	9.18919	303.874
55141	45.04	0.919	14.977		23.5947	9.1992	303.793
55242	45.22	0.922	14.978		23.689	9.22923	303.813
55343	44.38	0.924	14.977		23.249	9.24925	303.793
55443	44.38	0.924	14.977		23.249	9.24925	303.793
55545	45.46	0.924	14.98		23.8147	9.24925	303.854
55645	45.14	0.926	14.977		23.6471	9.26927	303.793
55746	45.14	0.926	14.977		23.6471	9.26927	303.793
55847	45.5	0.926	14.981		23.8357	9.26927	303.874
55948	45.42	0.93	14.977		23.7938	9.30931	303.793
56049	45.42	0.93	14.977		23.7938	9.30931	303.793
56149	45.66	0.928	14.98		23.9195	9.28929	303.854
56250	45.88	0.934	14.979		24.0348	9.34935	303.834
56351	45.88	0.934	14.979		24.0348	9.34935	303.834
56452	45.92	0.932	14.981		24.0557	9.32933	303.874
56553	45.7	0.936	14.979		23.9405	9.36937	303.834
56654	45.7	0.936	14.979		23.9405	9.36937	303.834
56755	45.94	0.937	14.981		24.0662	9.37938	303.874
56855	46.04	0.939	14.979		24.1186	9.3994	303.834
56956	45.32	0.939	14.981		23.7414	9.3994	303.874
57057	45.2	0.938	14.981		23.6785	9.38939	303.874
57158	46.34	0.94	14.983		24.2757	9.40941	303.915
57259	46.28	0.943	14.981		24.2443	9.43944	303.874
57359	46.28	0.943	14.981		24.2443	9.43944	303.874
57461	46.34	0.943	14.979		24.2757	9.43944	303.834
57561	46.22	0.946	14.979		24.2129	9.46947	303.834
57662	46.22	0.946	14.979		24.2129	9.46947	303.834
57763	46.52	0.945	14.982		24.37	9.45946	303.895
57864	46.64	0.947	14.977		24.4329	9.47948	303.793
57965	46.38	0.949	14.976		24.2967	9.4995	303.773
58065	46.12	0.949	14.978		24.1605	9.4995	303.813
58166	46.88	0.95	14.977		24.5586	9.50951	303.793
58267	46.94	0.951	14.977		24.59	9.51952	303.793
58368	46.14	0.953	14.978		24.171	9.53954	303.813
58469	46.1	0.952	14.978		24.15	9.52953	303.813
58570	46.1	0.952	14.978		24.15	9.52953	303.813
58671	46.44	0.957	14.979		24.3281	9.57958	303.834
58771	46.44	0.957	14.979		24.3281	9.57958	303.834
58872	47.36	0.958	14.977		24.8101	9.58959	303.793
58973	47.24	0.959	14.979		24.7472	9.5996	303.834
59074	47.24	0.959	14.979		24.7472	9.5996	303.834
59175	47.42	0.959	14.981		24.8415	9.5996	303.874
59275	47.7	0.962	14.98		24.9882	9.62963	303.854
59377	47.1	0.963	14.977		24.6739	9.63964	303.793
59477	47.1	0.963	14.977		24.6739	9.63964	303.793
59578	47.1	0.963	14.977		24.6739	9.63964	303.793
59679	47.24	0.967	14.978		24.7472	9.67968	303.813
59780	47.24	0.967	14.978		24.7472	9.67968	303.813
59881	47.84	0.967	14.981		25.0615	9.67968	303.874
59981	47.98	0.969	14.978		25.1349	9.6997	303.813
60082	47.64	0.969	14.979		24.9568	9.6997	303.834
60183	47.74	0.969	14.979		25.0091	9.6997	303.834
60284	48.1	0.971	14.979		25.1977	9.71972	303.834
60385	47.88	0.974	14.978		25.0825	9.74975	303.813
60485	47.88	0.974	14.978		25.0825	9.74975	303.813
60587	48.28	0.974	14.98		25.292	9.74975	303.854
60687	48.34	0.977	14.981		25.3235	9.77978	303.874
60788	48.34	0.977	14.981		25.3235	9.77978	303.874
60889	48.22	0.976	14.977		25.2606	9.76977	303.793
60990	48.6	0.979	14.98		25.4597	9.7998	303.854
61091	48.54	0.981	14.977		25.4282	9.81982	303.793
61191	48.54	0.981	14.977		25.4282	9.81982	303.793
61292	48.64	0.98	14.981		25.4806	9.80981	303.874
61393	48.88	0.983	14.978		25.6063	9.83984	303.813
61494	48.72	0.984	14.979		25.5225	9.84985	303.834
61595	48.14	0.984	14.979		25.2187	9.84985	303.834
61696	48.38	0.984	14.981		25.3444	9.84985	303.874
61797	48.38	0.984	14.981		25.3444	9.84985	303.874
61897	47.76	0.988	14.977		25.0196	9.88989	303.793
61998	47.76	0.988	14.977		25.0196	9.88989	303.793
62099	47.76	0.988	14.977		25.0196	9.88989	303.793
62200	47.76	0.988	14.977		25.0196	9.88989	303.793
62301	47.7	0.99	14.975		24.9882	9.90991	303.753
62401	49.4	0.992	14.982		25.8787	9.92993	303.895
62503	49.44	0.995	14.979		25.8997	9.95996	303.834
62603	49.44	0.995	14.979		25.8997	9.95996	303.834
62704	49.62	0.995	14.98		25.994	9.95996	303.854
62805	49.8	0.998	14.979		26.0883	9.98999	303.834
62906	48.72	0.998	14.979		25.5225	9.98999	303.834
63007	49.02	0.997	14.977		25.6797	9.97998	303.793
63107	49.02	0.997	14.977		25.6797	9.97998	303.793
63208	48.82	1.002	14.979		25.5749	10.03	303.834
63309	48.82	1.002	14.979		25.5749	10.03	303.834
63410	50	1.003	14.982		26.1931	10.04	303.895
63511	50.02	1.005	14.975		26.2035	10.0601	303.753
63612	50.02	1.005	14.975		26.2035	10.0601	303.753
63713	50.24	1.005	14.979		26.3188	10.0601	303.834
63813	50.28	1.008	14.98		26.3397	10.0901	303.854
63914	50.28	1.008	14.98		26.3397	10.0901	303.854
64015	50.28	1.008	14.98		26.3397	10.0901	303.854
64116	50.58	1.011	14.978		26.4969	10.1201	303.813
64217	49.36	1.011	14.977		25.8578	10.1201	303.793
64317	49.1	1.01	14.977		25.7216	10.1101	303.793
64419	49.1	1.01	14.977		25.7216	10.1101	303.793
64519	49.58	1.014	14.978		25.973	10.1502	303.813
64620	49.62	1.013	14.977		25.994	10.1401	303.793
64721	49.62	1.013	14.977		25.994	10.1401	303.793
64822	49.62	1.013	14.977		25.994	10.1401	303.793
64923	49.44	1.017	14.977		25.8997	10.1802	303.793
65023	50.96	1.018	14.983		26.696	10.1902	303.915
65124	50.96	1.022	14.976		26.696	10.2302	303.773
65225	50.96	1.022	14.976		26.696	10.2302	303.773
65326	50.94	1.022	14.981		26.6855	10.2302	303.874
65427	51.06	1.023	14.98		26.7484	10.2402	303.854
65528	51.12	1.024	14.975		26.7798	10.2503	303.753
65629	51.2	1.025	14.981		26.8217	10.2603	303.874
65729	51.38	1.025	14.979		26.916	10.2603	303.834
65830	51.4	1.027	14.979		26.9265	10.2803	303.834
65931	51.54	1.028	14.979		26.9998	10.2903	303.834
66032	51.54	1.029	14.979		26.9998	10.3003	303.834
66133	51.4	1.03	14.98		26.9265	10.3103	303.854
66233	51.52	1.03	14.977		26.9893	10.3103	303.793
66334	51.52	1.031	14.98		26.9893	10.3203	303.854
66435	51.82	1.033	14.979		27.1465	10.3403	303.834
66536	51.96	1.035	14.978		27.2198	10.3604	303.813
66637	51.96	1.035	14.978		27.2198	10.3604	303.813
66738	51.96	1.035	14.978		27.2198	10.3604	303.813
66839	52.12	1.038	14.979		27.3036	10.3904	303.834
66939	50.76	1.038	14.977		26.5912	10.3904	303.793
67040	51.1	1.038	14.979		26.7693	10.3904	303.834
67141	52.22	1.04	14.979		27.356	10.4104	303.834
67242	51.74	1.042	14.978		27.1046	10.4304	303.813
67343	51.26	1.042	14.977		26.8531	10.4304	303.793
67443	52.32	1.042	14.978		27.4084	10.4304	303.813
67545	52.5	1.046	14.978		27.5027	10.4705	303.813
67645	52.5	1.046	14.978		27.5027	10.4705	303.813
67746	52.4	1.045	14.979		27.4503	10.4605	303.834
67847	52.62	1.048	14.977		27.5656	10.4905	303.793
67948	52.1	1.048	14.977		27.2932	10.4905	303.793
68049	52.32	1.048	14.977		27.4084	10.4905	303.793
68149	52.72	1.049	14.977		27.618	10.5005	303.793
68250	52.8	1.052	14.977		27.6599	10.5305	303.793
68351	52.72	1.053	14.979		27.618	10.5405	303.834
68452	52.7	1.053	14.977		27.6075	10.5405	303.793
68553	53.06	1.054	14.979		27.7961	10.5506	303.834
68654	53.14	1.056	14.978		27.838	10.5706	303.813
68755	52.24	1.056	14.978		27.3665	10.5706	303.813
68855	52.44	1.056	14.977		27.4713	10.5706	303.793
68956	53.28	1.059	14.982		27.9113	10.6006	303.895
69057	53.2	1.06	14.978		27.8694	10.6106	303.813
69158	53.2	1.06	14.978		27.8694	10.6106	303.813
69259	53.24	1.06	14.978		27.8904	10.6106	303.813
69359	53.62	1.063	14.979		28.0894	10.6406	303.834
69461	52.42	1.063	14.98		27.4608	10.6406	303.854
69561	52.64	1.063	14.977		27.5761	10.6406	303.793
69662	53.64	1.065	14.979		28.0999	10.6607	303.834
69763	53.74	1.067	14.979		28.1523	10.6807	303.834
69864	53.74	1.067	14.979		28.1523	10.6807	303.834
69965	53.74	1.067	14.979		28.1523	10.6807	303.834
70065	53.98	1.07	14.98		28.278	10.7107	303.854
70166	53.04	1.071	14.975		27.7856	10.7207	303.753
70267	52.74	1.07	14.975		27.6284	10.7107	303.753
70368	54.1	1.073	14.981		28.3409	10.7407	303.874
70469	53.94	1.075	14.979		28.2571	10.7608	303.834
70570	53.94	1.075	14.979		28.2571	10.7608	303.834
70671	54.22	1.074	14.981		28.4038	10.7508	303.874
70771	54.24	1.078	14.981		28.4142	10.7908	303.874
70872	54.24	1.078	14.981		28.4142	10.7908	303.874
70973	54.28	1.079	14.98		28.4352	10.8008	303.854
71074	54.46	1.081	14.977		28.5295	10.8208	303.793
71175	54.46	1.081	14.977		28.5295	10.8208	303.793
71275	54.6	1.081	14.979		28.6028	10.8208	303.834
71377	54.86	1.083	14.979		28.739	10.8408	303.834
71477	54.86	1.083	14.979		28.739	10.8408	303.834
71578	54.86	1.083	14.979		28.739	10.8408	303.834
71679	54.88	1.087	14.981		28.7495	10.8809	303.874
71780	54.88	1.087	14.981		28.7495	10.8809	303.874
71881	54.74	1.087	14.978		28.6762	10.8809	303.813
71981	55.22	1.089	14.98		28.9276	10.9009	303.854
72082	54.82	1.09	14.976		28.7181	10.9109	303.773
72183	54.82	1.09	14.976		28.7181	10.9109	303.773
72284	55.16	1.091	14.979		28.8962	10.9209	303.834
72385	55.38	1.094	14.978		29.0114	10.951	303.813
72485	54.86	1.093	14.977		28.739	10.9409	303.793
72587	54.86	1.093	14.977		28.739	10.9409	303.793
72687	55.52	1.094	14.978		29.0848	10.951	303.813
72788	55.48	1.097	14.979		29.0638	10.981	303.834
72889	55.48	1.097	14.979		29.0638	10.981	303.834
72990	55.4	1.097	14.978		29.0219	10.981	303.813
73091	55.84	1.1	14.979		29.2524	11.011	303.834
73191	55.24	1.101	14.981		28.9381	11.021	303.874
73292	55.24	1.101	14.981		28.9381	11.021	303.874
73393	55.82	1.102	14.98		29.2419	11.031	303.854
73494	55.94	1.104	14.98		29.3048	11.0511	303.854
73595	55.58	1.104	14.977		29.1162	11.0511	303.793
73696	55.58	1.104	14.975		29.1162	11.0511	303.753
73797	56.14	1.106	14.979		29.4096	11.0711	303.834
73897	56.12	1.108	14.979		29.3991	11.0911	303.834
73998	56.12	1.108	14.979		29.3991	11.0911	303.834
74099	56.08	1.108	14.98		29.3781	11.0911	303.854
74200	56.36	1.111	14.981		29.5248	11.1211	303.874
74301	56.28	1.112	14.978		29.4829	11.1311	303.813
74401	56.26	1.112	14.977		29.4724	11.1311	303.793
74503	56.24	1.113	14.978		29.462	11.1411	303.813
74603	56.3	1.115	14.979		29.4934	11.1612	303.834
74704	56.66	1.116	14.979		29.682	11.1712	303.834
74805	55.82	1.117	14.977		29.2419	11.1812	303.793
74906	55.82	1.117	14.977		29.2419	11.1812	303.793
75007	56.8	1.119	14.979		29.7553	11.2012	303.834
75107	56.8	1.12	14.98		29.7553	11.2112	303.854
75208	56.8	1.12	14.98		29.7553	11.2112	303.854
75309	56.54	1.121	14.98		29.6191	11.2212	303.854
75410	56.54	1.121	14.98		29.6191	11.2212	303.854
75511	56.54	1.124	14.977		29.6191	11.2513	303.793
75612	56.54	1.124	14.977		29.6191	11.2513	303.793
75713	57.22	1.125	14.978		29.9753	11.2613	303.813
75813	56.96	1.128	14.979		29.8391	11.2913	303.834
75914	56.96	1.128	14.979		29.8391	11.2913	303.834
76015	57.1	1.127	14.979		29.9125	11.2813	303.834
76116	57.58	1.13	14.979		30.1639	11.3113	303.834
76217	56.58	1.132	14.979		29.6401	11.3313	303.834
76317	56.58	1.132	14.979		29.6401	11.3313	303.834
76419	56.58	1.132	14.979		29.6401	11.3313	303.834
76519	56.36	1.134	14.977		29.5248	11.3514	303.793
76620	56.06	1.134	14.975		29.3677	11.3514	303.753
76721	57.76	1.136	14.979		30.2582	11.3714	303.834
76822	57.46	1.137	14.981		30.1011	11.3814	303.874
76923	57.06	1.137	14.978		29.8915	11.3814	303.813
77023	57.96	1.139	14.977		30.363	11.4014	303.793
77124	58.12	1.141	14.979		30.4468	11.4214	303.834
77225	57.36	1.141	14.98		30.0487	11.4214	303.854
77326	57.38	1.14	14.977		30.0592	11.4114	303.793
77427	58.34	1.144	14.978		30.5621	11.4515	303.813
77528	57.9	1.144	14.98		30.3316	11.4515	303.854
77629	58.06	1.144	14.978		30.4154	11.4515	303.813
77729	58.42	1.145	14.977		30.604	11.4615	303.793
77830	58.82	1.144	14.982		30.8135	11.4515	303.895
77931	57	1.151	14.976		29.8601	11.5215	303.773
78032	57	1.151	14.976		29.8601	11.5215	303.773
78133	57	1.151	14.976		29.8601	11.5215	303.773
78233	57	1.151	14.976		29.8601	11.5215	303.773
78334	57.84	1.152	14.978		30.3001	11.5315	303.813
78435	57.62	1.152	14.979		30.1849	11.5315	303.834
78536	58.32	1.153	14.979		30.5516	11.5415	303.834
78637	58.8	1.155	14.98		30.803	11.5616	303.854
78738	58.86	1.155	14.979		30.8345	11.5616	303.834
78839	58.86	1.157	14.98		30.8345	11.5816	303.854
78939	58.92	1.158	14.979		30.8659	11.5916	303.834
79040	58.86	1.159	14.978		30.8345	11.6016	303.813
79141	58.92	1.159	14.977		30.8659	11.6016	303.793
79242	59.14	1.16	14.978		30.9812	11.6116	303.813
79343	59.38	1.162	14.979		31.1069	11.6316	303.834
79443	58.94	1.163	14.98		30.8764	11.6416	303.854
79545	58.72	1.163	14.978		30.7611	11.6416	303.813
79645	59.46	1.164	14.979		31.1488	11.6517	303.834
79746	59.42	1.167	14.977		31.1278	11.6817	303.793
79847	58.64	1.166	14.978		30.7192	11.6717	303.813
79948	58.88	1.167	14.977		30.845	11.6817	303.793
80049	59.72	1.169	14.979		31.285	11.7017	303.834
80149	59.44	1.171	14.978		31.1383	11.7217	303.813
80250	59.44	1.171	14.978		31.1383	11.7217	303.813
80351	59.54	1.171	14.982		31.1907	11.7217	303.895
80452	60.18	1.172	14.979		31.526	11.7317	303.834
80553	60.4	1.174	14.979		31.6412	11.7518	303.834
80654	59.38	1.179	14.979		31.1069	11.8018	303.834
80755	59.38	1.179	14.979		31.1069	11.8018	303.834
80855	59.38	1.175	14.983		31.1069	11.7618	303.915
80956	59.38	1.175	14.983		31.1069	11.7618	303.915
81057	59.14	1.182	14.978		30.9812	11.8318	303.813
81158	59.14	1.182	14.978		30.9812	11.8318	303.813
81259	60.08	1.179	14.984		31.4736	11.8018	303.935
81359	60.14	1.183	14.976		31.505	11.8418	303.773
81461	60.14	1.183	14.976		31.505	11.8418	303.773
81561	60.58	1.18	14.98		31.7355	11.8118	303.854
81662	59.9	1.187	14.979		31.3793	11.8819	303.834
81763	59.9	1.187	14.979		31.3793	11.8819	303.834
81864	60.12	1.186	14.98		31.4945	11.8719	303.854
81965	60.86	1.189	14.981		31.8822	11.9019	303.874
82065	60.66	1.189	14.975		31.7774	11.9019	303.753
82166	60.94	1.19	14.976		31.9241	11.9119	303.773
82267	61	1.191	14.979		31.9555	11.9219	303.834
82368	61.1	1.192	14.977		32.0079	11.9319	303.793
82469	60.86	1.193	14.98		31.8822	11.9419	303.854
82570	61.12	1.193	14.979		32.0184	11.9419	303.834
82671	61.34	1.193	14.98		32.1336	11.9419	303.854
82771	61.58	1.199	14.979		32.2594	12.002	303.834
82872	61.58	1.199	14.979		32.2594	12.002	303.834
82973	61.58	1.199	14.979		32.2594	12.002	303.834
83074	61.68	1.199	14.977		32.3118	12.002	303.793
83175	61.26	1.2	14.978		32.0917	12.012	303.813
83275	61.58	1.2	14.981		32.2594	12.012	303.874
83377	61.82	1.202	14.979		32.3851	12.032	303.834
83477	61.72	1.203	14.979		32.3327	12.042	303.834
83578	61.76	1.203	14.977		32.3537	12.042	303.793
83679	61.86	1.204	14.977		32.4061	12.0521	303.793
83780	61.9	1.206	14.978		32.427	12.0721	303.813
83881	62	1.207	14.977		32.4794	12.0821	303.793
83981	62	1.208	14.976		32.4794	12.0921	303.773
84082	62	1.209	14.979		32.4794	12.1021	303.834
84183	62.22	1.21	14.978		32.5946	12.1121	303.813
84284	62.24	1.212	14.976		32.6051	12.1321	303.773
84385	62.28	1.213	14.979		32.6261	12.1421	303.834
84485	62.06	1.212	14.98		32.5108	12.1321	303.854
84587	62.1	1.214	14.98		32.5318	12.1522	303.854
84687	62.3	1.214	14.979		32.6366	12.1522	303.834
84788	62.74	1.216	14.981		32.8671	12.1722	303.874
84889	62.26	1.219	14.979		32.6156	12.2022	303.834
84990	62.26	1.219	14.979		32.6156	12.2022	303.834
85091	62.78	1.219	14.982		32.888	12.2022	303.895
85191	62.7	1.221	14.974		32.8461	12.2222	303.732
85292	62.56	1.221	14.976		32.7728	12.2222	303.773
85393	62.96	1.223	14.979		32.9823	12.2422	303.834
85494	62.94	1.224	14.981		32.9718	12.2523	303.874
85595	62.74	1.224	14.979		32.8671	12.2523	303.834
85696	62.92	1.224	14.981		32.9614	12.2523	303.874
85797	63.08	1.227	14.98		33.0452	12.2823	303.854
85897	63.18	1.227	14.98		33.0976	12.2823	303.854
85998	63.16	1.228	14.979		33.0871	12.2923	303.834
86099	63.16	1.228	14.979		33.0871	12.2923	303.834
86200	63.34	1.231	14.982		33.1814	12.3223	303.895
86301	63.42	1.233	14.98		33.2233	12.3423	303.854
86401	63.42	1.233	14.98		33.2233	12.3423	303.854
86503	63.38	1.232	14.981		33.2023	12.3323	303.874
86603	63.62	1.235	14.979		33.3281	12.3624	303.834
86704	63.58	1.236	14.981		33.3071	12.3724	303.874
86805	63.58	1.236	14.981		33.3071	12.3724	303.874
86906	63.64	1.237	14.98		33.3385	12.3824	303.854
87007	63.68	1.239	14.98		33.3595	12.4024	303.854
87107	63.62	1.24	14.979		33.3281	12.4124	303.834
87208	63.62	1.24	14.979		33.3281	12.4124	303.834
87309	63.8	1.24	14.98		33.4223	12.4124	303.854
87410	64.12	1.244	14.979		33.59	12.4525	303.834
87511	63.74	1.245	14.977		33.3909	12.4625	303.793
87612	63.74	1.245	14.977		33.3909	12.4625	303.793
87713	64.04	1.245	14.981		33.5481	12.4625	303.874
87813	64.22	1.248	14.977		33.6424	12.4925	303.793
87914	63.66	1.247	14.978		33.349	12.4825	303.813
88015	64	1.248	14.979		33.5271	12.4925	303.834
88116	64.2	1.249	14.978		33.6319	12.5025	303.813
88217	64.46	1.251	14.978		33.7681	12.5225	303.813
88317	64.32	1.251	14.978		33.6948	12.5225	303.813
88419	64.32	1.251	14.978		33.6948	12.5225	303.813
88519	64.5	1.252	14.981		33.7891	12.5325	303.874
88620	64.72	1.255	14.98		33.9043	12.5626	303.854
88721	63.9	1.256	14.977		33.4747	12.5726	303.793
88822	63.9	1.256	14.977		33.4747	12.5726	303.793
88923	63.9	1.256	14.977		33.4747	12.5726	303.793
89023	64	1.26	14.977		33.5271	12.6126	303.793
89124	64	1.26	14.977		33.5271	12.6126	303.793
89225	64.8	1.26	14.981		33.9462	12.6126	303.874
89326	64.96	1.262	14.979		34.03	12.6326	303.834
89427	64.32	1.263	14.977		33.6948	12.6426	303.793
89528	64.06	1.263	14.979		33.5586	12.6426	303.834
89629	64.06	1.263	14.979		33.5586	12.6426	303.834
89729	64.42	1.267	14.978		33.7471	12.6827	303.813
89830	64.42	1.267	14.978		33.7471	12.6827	303.813
89931	65.32	1.266	14.98		34.2186	12.6727	303.854
90032	65.1	1.271	14.975		34.1034	12.7227	303.753
90133	65.1	1.271	14.975		34.1034	12.7227	303.753
90233	65.5	1.271	14.98		34.3129	12.7227	303.854
90334	65.42	1.272	14.981		34.271	12.7327	303.874
90435	65.16	1.272	14.975		34.1348	12.7327	303.753
90536	65.52	1.273	14.979		34.3234	12.7427	303.834
90637	65.8	1.275	14.981		34.4701	12.7628	303.874
90738	64.96	1.276	14.978		34.03	12.7728	303.813
90839	64.96	1.276	14.978		34.03	12.7728	303.813
90939	65.84	1.278	14.981		34.491	12.7928	303.874
91040	65.98	1.279	14.977		34.5644	12.8028	303.793
91141	65.66	1.28	14.979		34.3967	12.8128	303.834
91242	65.26	1.28	14.975		34.1872	12.8128	303.753
91343	66.06	1.281	14.982		34.6063	12.8228	303.895
91443	66.28	1.282	14.979		34.7215	12.8328	303.834
91545	65.58	1.284	14.976		34.3548	12.8529	303.773
91645	65.58	1.284	14.976		34.3548	12.8529	303.773
91746	66.22	1.286	14.984		34.6901	12.8729	303.935
91847	66.36	1.287	14.979		34.7634	12.8829	303.834
91948	65.92	1.288	14.977		34.5329	12.8929	303.793
92049	65.68	1.288	14.977		34.4072	12.8929	303.793
92149	66.4	1.289	14.981		34.7844	12.9029	303.874
92250	66.66	1.291	14.977		34.9206	12.9229	303.793
92351	66.42	1.293	14.978		34.7949	12.9429	303.813
92452	66.42	1.293	14.978		34.7949	12.9429	303.813
92553	66.64	1.292	14.981		34.9101	12.9329	303.874
92654	66.94	1.295	14.979		35.0673	12.963	303.834
92755	66.68	1.297	14.979		34.9311	12.983	303.834
92855	66.68	1.297	14.979		34.9311	12.983	303.834
92956	66.98	1.297	14.981		35.0882	12.983	303.874
93057	67.16	1.299	14.978		35.1825	13.003	303.813
93158	65.88	1.3	14.975		34.512	13.013	303.753
93259	66.26	1.3	14.978		34.711	13.013	303.813
93359	66.26	1.3	14.978		34.711	13.013	303.813
93461	65.88	1.303	14.974		34.512	13.043	303.732
93561	66.02	1.303	14.979		34.5853	13.043	303.834
93662	67.48	1.305	14.982		35.3502	13.0631	303.895
93763	67.38	1.307	14.978		35.2978	13.0831	303.813
93864	67.38	1.307	14.978		35.2978	13.0831	303.813
93965	67.24	1.306	14.979		35.2244	13.0731	303.834
94065	67.74	1.311	14.98		35.4864	13.1231	303.854
94166	67.74	1.311	14.98		35.4864	13.1231	303.854
94267	67.24	1.31	14.979		35.2244	13.1131	303.834
94368	67.24	1.31	14.979		35.2244	13.1131	303.834
94469	67.08	1.314	14.979		35.1406	13.1532	303.834
94570	67.24	1.314	14.977		35.2244	13.1532	303.793
94671	67.86	1.315	14.978		35.5492	13.1632	303.813
94771	68.02	1.317	14.976		35.633	13.1832	303.773
94872	67.86	1.318	14.976		35.5492	13.1932	303.773
94973	67.72	1.317	14.979		35.4759	13.1832	303.834
95074	68.08	1.318	14.981		35.6645	13.1932	303.874
95175	68.2	1.32	14.982		35.7273	13.2132	303.895
95275	68.14	1.321	14.978		35.6959	13.2232	303.813
95377	68.12	1.323	14.977		35.6854	13.2432	303.793
95477	68.1	1.323	14.977		35.675	13.2432	303.793
95578	68.3	1.324	14.979		35.7797	13.2533	303.834
95679	68.34	1.325	14.979		35.8007	13.2633	303.834
95780	68.52	1.326	14.981		35.895	13.2733	303.874
95881	68.44	1.327	14.981		35.8531	13.2833	303.874
95981	68.58	1.327	14.981		35.9264	13.2833	303.874
96082	68.62	1.33	14.977		35.9474	13.3133	303.793
96183	68.64	1.33	14.978		35.9578	13.3133	303.813
96284	68.76	1.332	14.979		36.0207	13.3333	303.834
96385	68.82	1.332	14.977		36.0521	13.3333	303.793
96485	68.78	1.334	14.978		36.0312	13.3534	303.813
96587	68.7	1.334	14.979		35.9893	13.3534	303.834
96687	68.58	1.335	14.977		35.9264	13.3634	303.793
96788	68.76	1.335	14.978		36.0207	13.3634	303.813
96889	68.94	1.337	14.977		36.115	13.3834	303.793
96990	69.32	1.339	14.979		36.3141	13.4034	303.834
97091	68.94	1.34	14.976		36.115	13.4134	303.773
97191	68.94	1.34	14.976		36.115	13.4134	303.773
97292	69.26	1.34	14.979		36.2826	13.4134	303.834
97393	69.46	1.343	14.98		36.3874	13.4434	303.854
97494	68.22	1.343	14.978		35.7378	13.4434	303.813
97595	68.26	1.343	14.98		35.7588	13.4434	303.854
97696	69.54	1.344	14.977		36.4293	13.4535	303.793
97797	69.62	1.347	14.98		36.4712	13.4835	303.854
97897	69.62	1.347	14.98		36.4712	13.4835	303.854
97998	69.52	1.346	14.977		36.4188	13.4735	303.793
98099	69.68	1.349	14.979		36.5027	13.5035	303.834
98200	69.66	1.351	14.977		36.4922	13.5235	303.793
98301	69.66	1.351	14.977		36.4922	13.5235	303.793
98401	69.72	1.351	14.978		36.5236	13.5235	303.813
98503	69.96	1.353	14.98		36.6493	13.5435	303.854
98603	69.64	1.354	14.98		36.4817	13.5536	303.854
98704	69.64	1.354	14.98		36.4817	13.5536	303.854
98805	70.08	1.355	14.979		36.7122	13.5636	303.834
98906	70.22	1.359	14.981		36.7855	13.6036	303.874
99007	70.22	1.359	14.981		36.7855	13.6036	303.874
99107	70.22	1.359	14.981		36.7855	13.6036	303.874
99208	70.38	1.36	14.975		36.8694	13.6136	303.753
99309	70.32	1.362	14.979		36.8379	13.6336	303.834
99410	69.68	1.363	14.977		36.5027	13.6436	303.793
99511	69.24	1.364	14.978		36.2722	13.6537	303.813
99612	69.24	1.364	14.978		36.2722	13.6537	303.813
99713	69.24	1.364	14.978		36.2722	13.6537	303.813
99813	68.76	1.364	14.977		36.0207	13.6537	303.793
99914	70.74	1.368	14.981		37.0579	13.6937	303.874
100015	70.68	1.369	14.98		37.0265	13.7037	303.854
100116	70.58	1.369	14.977		36.9741	13.7037	303.793
100217	70.48	1.369	14.979		36.9217	13.7037	303.834
100317	70.88	1.371	14.981		37.1313	13.7237	303.874
100419	70.88	1.374	14.979		37.1313	13.7538	303.834
100519	70.78	1.373	14.979		37.0789	13.7437	303.834
100620	70.74	1.374	14.977		37.0579	13.7538	303.793
100721	70.92	1.375	14.979		37.1522	13.7638	303.834
100822	71.14	1.377	14.979		37.2675	13.7838	303.834
100923	70.84	1.378	14.979		37.1103	13.7938	303.834
101023	70.84	1.378	14.979		37.1103	13.7938	303.834
101124	71.26	1.379	14.979		37.3304	13.8038	303.834
101225	71.42	1.381	14.978		37.4142	13.8238	303.813
101326	70.84	1.383	14.977		37.1103	13.8438	303.793
101427	70.84	1.383	14.977		37.1103	13.8438	303.793
101528	71.44	1.382	14.979		37.4246	13.8338	303.834
101629	71.5	1.384	14.981		37.4561	13.8539	303.874
101729	71.38	1.385	14.979		37.3932	13.8639	303.834
101830	71.44	1.385	14.979		37.4246	13.8639	303.834
101931	71.62	1.386	14.977		37.5189	13.8739	303.793
102032	71.64	1.388	14.978		37.5294	13.8939	303.813
102133	71.76	1.391	14.977		37.5923	13.9239	303.793
102233	71.64	1.391	14.976		37.5294	13.9239	303.773
102334	71.32	1.391	14.977		37.3618	13.9239	303.793
102435	71.46	1.391	14.979		37.4351	13.9239	303.834
102536	71.46	1.391	14.979		37.4351	13.9239	303.834
102637	71.42	1.396	14.977		37.4142	13.974	303.793
102738	71.42	1.396	14.977		37.4142	13.974	303.793
102839	71.86	1.396	14.981		37.6447	13.974	303.874
102939	72.24	1.399	14.983		37.8437	14.004	303.915
103040	72.24	1.399	14.983		37.8437	14.004	303.915
103141	72.24	1.399	14.983		37.8437	14.004	303.915
103242	72.38	1.4	14.982		37.9171	14.014	303.895
103343	71.88	1.403	14.976		37.6551	14.044	303.773
103443	71.88	1.403	14.976		37.6551	14.044	303.773
103545	72.4	1.402	14.979		37.9276	14.034	303.834
103645	72.4	1.405	14.981		37.9276	14.0641	303.874
103746	72.4	1.405	14.981		37.9276	14.0641	303.874
103847	72.28	1.406	14.979		37.8647	14.0741	303.834
103948	72.78	1.407	14.979		38.1266	14.0841	303.834
104049	72.66	1.41	14.978		38.0638	14.1141	303.813
104149	72.12	1.409	14.979		37.7809	14.1041	303.834
104250	72.6	1.409	14.981		38.0323	14.1041	303.874
104351	72.82	1.411	14.981		38.1476	14.1241	303.874
104452	72.78	1.414	14.975		38.1266	14.1542	303.753
104553	72.52	1.413	14.979		37.9904	14.1441	303.834
104654	72.78	1.413	14.982		38.1266	14.1441	303.895
104755	73.22	1.416	14.978		38.3571	14.1742	303.813
104855	73.14	1.417	14.977		38.3152	14.1842	303.793
104956	73.16	1.418	14.978		38.3257	14.1942	303.813
105057	73.08	1.418	14.979		38.2838	14.1942	303.834
105158	73.24	1.419	14.98		38.3676	14.2042	303.854
105259	73.26	1.421	14.979		38.3781	14.2242	303.834
105359	73.6	1.423	14.978		38.5562	14.2442	303.813
105461	71.94	1.424	14.975		37.6866	14.2543	303.753
105561	72.18	1.421	14.979		37.8123	14.2242	303.834
105662	72.18	1.421	14.979		37.8123	14.2242	303.834
105763	72.18	1.421	14.979		37.8123	14.2242	303.834
105864	72.52	1.426	14.975		37.9904	14.2743	303.753
105965	73.72	1.428	14.981		38.6191	14.2943	303.874
106065	73.88	1.429	14.978		38.7029	14.3043	303.813
106166	73.88	1.429	14.978		38.7029	14.3043	303.813
106267	73.88	1.429	14.978		38.7029	14.3043	303.813
106368	74.08	1.433	14.979		38.8076	14.3443	303.834
106469	73.16	1.433	14.975		38.3257	14.3443	303.753
106570	73.16	1.433	14.975		38.3257	14.3443	303.753
106671	74.1	1.434	14.981		38.8181	14.3544	303.874
106771	74.26	1.437	14.975		38.9019	14.3844	303.753
106872	73.48	1.437	14.978		38.4933	14.3844	303.813
106973	73.34	1.437	14.979		38.42	14.3844	303.834
107074	74.3	1.438	14.98		38.9229	14.3944	303.854
107175	74.14	1.441	14.979		38.8391	14.4244	303.834
107275	74.02	1.441	14.975		38.7762	14.4244	303.753
107377	74.24	1.441	14.979		38.8915	14.4244	303.834
107477	74.62	1.443	14.982		39.0905	14.4444	303.895
107578	74.76	1.444	14.979		39.1639	14.4545	303.834
107679	73.62	1.445	14.978		38.5667	14.4645	303.813
107780	73.24	1.445	14.977		38.3676	14.4645	303.793
107881	74.78	1.445	14.98		39.1743	14.4645	303.854
107981	74.82	1.449	14.977		39.1953	14.5045	303.793
108082	74.82	1.449	14.977		39.1953	14.5045	303.793
108183	74.82	1.449	14.977		39.1953	14.5045	303.793
108284	75.02	1.452	14.981		39.3001	14.5345	303.874
108385	75.02	1.453	14.979		39.3001	14.5445	303.834
108485	74.84	1.451	14.979		39.2058	14.5245	303.834
108587	75.06	1.453	14.979		39.321	14.5445	303.834
108687	75.06	1.453	14.979		39.321	14.5445	303.834
108788	75.06	1.453	14.979		39.321	14.5445	303.834
108889	75.06	1.453	14.979		39.321	14.5445	303.834
108990	75.46	1.458	14.981		39.5306	14.5946	303.874
109091	74.5	1.46	14.977		39.0277	14.6146	303.793
109191	74.5	1.46	14.977		39.0277	14.6146	303.793
109292	75.18	1.46	14.979		39.3839	14.6146	303.834
109393	75.58	1.463	14.982		39.5934	14.6446	303.895
109494	74.5	1.464	14.977		39.0277	14.6547	303.793
109595	74.5	1.464	14.977		39.0277	14.6547	303.793
109696	75.7	1.465	14.98		39.6563	14.6647	303.854
109797	75.54	1.467	14.976		39.5725	14.6847	303.773
109897	75.6	1.466	14.978		39.6039	14.6747	303.813
109998	75.78	1.468	14.98		39.6982	14.6947	303.854
110099	75.64	1.47	14.977		39.6249	14.7147	303.793
110200	75.64	1.47	14.977		39.6249	14.7147	303.793
110301	76.08	1.471	14.979		39.8554	14.7247	303.834
110401	76.06	1.472	14.979		39.8449	14.7347	303.834
110503	75.72	1.474	14.977		39.6668	14.7548	303.793
110603	76	1.473	14.979		39.8135	14.7447	303.834
110704	76.16	1.475	14.981		39.8973	14.7648	303.874
110805	76.2	1.476	14.975		39.9182	14.7748	303.753
110906	76.16	1.476	14.978		39.8973	14.7748	303.813
111007	76.52	1.479	14.979		40.0859	14.8048	303.834
111107	75.94	1.479	14.98		39.782	14.8048	303.854
111208	75.72	1.478	14.978		39.6668	14.7948	303.813
111309	76.7	1.479	14.981		40.1802	14.8048	303.874
111410	76.76	1.483	14.977		40.2116	14.8448	303.793
111511	76.76	1.483	14.977		40.2116	14.8448	303.793
111612	76.76	1.483	14.977		40.2116	14.8448	303.793
111713	76.8	1.486	14.981		40.2325	14.8749	303.874
111813	76.8	1.486	14.981		40.2325	14.8749	303.874
111914	76.88	1.487	14.979		40.2745	14.8849	303.834
112015	77.02	1.489	14.982		40.3478	14.9049	303.895
112116	77.02	1.489	14.982		40.3478	14.9049	303.895
112217	77.02	1.489	14.982		40.3478	14.9049	303.895
112317	77.06	1.492	14.98		40.3687	14.9349	303.854
112419	76.96	1.493	14.977		40.3164	14.9449	303.793
112519	76.98	1.493	14.977		40.3268	14.9449	303.793
112620	77.04	1.495	14.977		40.3583	14.965	303.793
112721	77.1	1.496	14.977		40.3897	14.975	303.793
112822	77.08	1.496	14.979		40.3792	14.975	303.834
112923	77.14	1.497	14.977		40.4107	14.985	303.793
113023	77.26	1.497	14.983		40.4735	14.985	303.915
113124	77.38	1.499	14.979		40.5364	15.005	303.834
113225	77.28	1.5	14.978		40.484	15.015	303.813
113326	77.24	1.5	14.977		40.463	15.015	303.793
113427	77.66	1.501	14.978		40.6831	15.025	303.813
113528	77.54	1.504	14.978		40.6202	15.0551	303.813
113629	77.42	1.504	14.979		40.5573	15.0551	303.834
113729	77.66	1.505	14.978		40.6831	15.0651	303.813
113830	77.78	1.506	14.977		40.7459	15.0751	303.793
113931	77.86	1.508	14.979		40.7878	15.0951	303.834
114032	77.96	1.508	14.979		40.8402	15.0951	303.834
114133	77.88	1.51	14.977		40.7983	15.1151	303.793
114233	77.86	1.509	14.978		40.7878	15.1051	303.813
114334	77.94	1.511	14.981		40.8297	15.1251	303.874
114435	78.06	1.513	14.979		40.8926	15.1451	303.834
114536	78.14	1.513	14.975		40.9345	15.1451	303.753
114637	78.14	1.514	14.981		40.9345	15.1552	303.874
114738	78.16	1.516	14.977		40.945	15.1752	303.793
114839	78.22	1.515	14.979		40.9764	15.1652	303.834
114939	78.18	1.517	14.977		40.9555	15.1852	303.793
115040	78.26	1.518	14.979		40.9974	15.1952	303.834
115141	78.4	1.521	14.981		41.0707	15.2252	303.874
115242	78.38	1.521	14.98		41.0602	15.2252	303.854
115343	78.34	1.521	14.981		41.0393	15.2252	303.874
115443	78.38	1.523	14.978		41.0602	15.2452	303.813
115545	78.42	1.524	14.98		41.0812	15.2553	303.854
115645	78.38	1.524	14.979		41.0602	15.2553	303.834
115746	78.46	1.525	14.977		41.1022	15.2653	303.793
115847	78.56	1.526	14.979		41.1545	15.2753	303.834
115948	78.66	1.527	14.979		41.2069	15.2853	303.834
116049	78.74	1.528	14.979		41.2488	15.2953	303.834
116149	78.76	1.529	14.979		41.2593	15.3053	303.834
116250	78.78	1.531	14.979		41.2698	15.3253	303.834
116351	78.86	1.531	14.98		41.3117	15.3253	303.854
116452	78.96	1.533	14.98		41.3641	15.3453	303.854
116553	79.08	1.534	14.978		41.4269	15.3554	303.813
116654	79.1	1.535	14.979		41.4374	15.3654	303.834
116755	79.12	1.536	14.977		41.4479	15.3754	303.793
116855	79.06	1.536	14.977		41.4165	15.3754	303.793
116956	79.14	1.537	14.978		41.4584	15.3854	303.813
117057	79.14	1.538	14.981		41.4584	15.3954	303.874
117158	79.36	1.539	14.979		41.5736	15.4054	303.834
117259	79.4	1.541	14.981		41.5946	15.4254	303.874
117359	79.48	1.542	14.981		41.6365	15.4354	303.874
117461	78.08	1.542	14.977		40.9031	15.4354	303.793
117561	78.36	1.541	14.977		41.0498	15.4254	303.793
117662	78.36	1.541	14.977		41.0498	15.4254	303.793
117763	78.34	1.547	14.975		41.0393	15.4855	303.753
117864	78.34	1.547	14.975		41.0393	15.4855	303.753
117965	79.76	1.548	14.982		41.7832	15.4955	303.895
118065	79.48	1.549	14.977		41.6365	15.5055	303.793
118166	79.48	1.549	14.977		41.6365	15.5055	303.793
118267	79.9	1.55	14.979		41.8565	15.5155	303.834
118368	79.82	1.553	14.98		41.8146	15.5455	303.854
118469	79.82	1.553	14.98		41.8146	15.5455	303.854
118570	79.86	1.553	14.98		41.8356	15.5455	303.854
118671	80.08	1.555	14.979		41.9508	15.5656	303.834
118771	79.1	1.555	14.977		41.4374	15.5656	303.793
118872	78.86	1.556	14.978		41.3117	15.5756	303.813
118973	80.22	1.557	14.98		42.0241	15.5856	303.854
119074	80.32	1.559	14.981		42.0765	15.6056	303.874
119175	79.18	1.559	14.976		41.4793	15.6056	303.773
119275	79.3	1.559	14.978		41.5422	15.6056	303.813
119377	80.38	1.562	14.98		42.108	15.6356	303.854
119477	80.38	1.564	14.977		42.108	15.6557	303.793
119578	80.12	1.564	14.98		41.9718	15.6557	303.854
119679	80.3	1.564	14.977		42.0661	15.6557	303.793
119780	80.58	1.565	14.982		42.2127	15.6657	303.895
119881	80.64	1.567	14.977		42.2442	15.6857	303.793
119981	80.66	1.569	14.978		42.2546	15.7057	303.813
120082	79.96	1.569	14.98		41.8879	15.7057	303.854
120183	80.42	1.569	14.979		42.1289	15.7057	303.834
120284	81.06	1.572	14.981		42.4642	15.7357	303.874
120385	80.7	1.572	14.977		42.2756	15.7357	303.793
120485	80.7	1.572	14.977		42.2756	15.7357	303.793
120587	81.02	1.574	14.98		42.4432	15.7558	303.854
120687	81.12	1.575	14.982		42.4956	15.7658	303.895
120788	80.68	1.577	14.979		42.2651	15.7858	303.834
120889	80.68	1.577	14.979		42.2651	15.7858	303.834
120990	81.02	1.577	14.977		42.4432	15.7858	303.793
121091	81.48	1.58	14.981		42.6842	15.8158	303.874
121191	80.16	1.58	14.978		41.9927	15.8158	303.813
121292	79.74	1.579	14.98		41.7727	15.8058	303.854
121393	81.42	1.581	14.979		42.6528	15.8258	303.834
121494	81.34	1.584	14.977		42.6109	15.8559	303.793
121595	81.34	1.584	14.977		42.6109	15.8559	303.793
121696	80.94	1.584	14.981		42.4013	15.8559	303.874
121797	81.58	1.586	14.98		42.7366	15.8759	303.854
121897	81.4	1.588	14.979		42.6423	15.8959	303.834
121998	81.4	1.588	14.979		42.6423	15.8959	303.834
122099	81.58	1.588	14.981		42.7366	15.8959	303.874
122200	81.8	1.591	14.977		42.8519	15.9259	303.793
122301	81.8	1.591	14.977		42.8519	15.9259	303.793
122401	81.62	1.592	14.981		42.7576	15.9359	303.874
122503	82	1.595	14.979		42.9566	15.966	303.834
122603	82	1.595	14.979		42.9566	15.966	303.834
122704	82.02	1.594	14.981		42.9671	15.956	303.874
122805	82.1	1.598	14.977		43.009	15.996	303.793
122906	82.1	1.598	14.977		43.009	15.996	303.793
123007	81.96	1.596	14.982		42.9357	15.976	303.895
123107	82.32	1.6	14.979		43.1243	16.016	303.834
123208	81.16	1.6	14.979		42.5166	16.016	303.834
123309	81.46	1.599	14.979		42.6737	16.006	303.834
123410	81.46	1.599	14.979		42.6737	16.006	303.834
123511	81.52	1.604	14.976		42.7052	16.0561	303.773
123612	81.02	1.602	14.976		42.4432	16.036	303.773
123713	82.52	1.604	14.979		43.229	16.0561	303.834
123813	82.58	1.607	14.98		43.2605	16.0861	303.854
123914	82.58	1.607	14.98		43.2605	16.0861	303.854
124015	82.58	1.607	14.98		43.2605	16.0861	303.854
124116	82.72	1.61	14.98		43.3338	16.1161	303.854
124217	82.72	1.61	14.98		43.3338	16.1161	303.854
124317	82.6	1.61	14.981		43.2709	16.1161	303.874
124419	82.8	1.611	14.981		43.3757	16.1261	303.874
124519	82.88	1.613	14.979		43.4176	16.1461	303.834
124620	82.88	1.613	14.979		43.4176	16.1461	303.834
124721	82.9	1.614	14.979		43.4281	16.1562	303.834
124822	83.1	1.618	14.981		43.5329	16.1962	303.874
124923	82.74	1.617	14.979		43.3443	16.1862	303.834
125023	82.66	1.618	14.978		43.3024	16.1962	303.813
125124	83.18	1.619	14.981		43.5748	16.2062	303.874
125225	83.2	1.621	14.975		43.5853	16.2262	303.753
125326	83.2	1.621	14.975		43.5853	16.2262	303.753
125427	83.12	1.621	14.979		43.5433	16.2262	303.834
125528	83.4	1.624	14.98		43.69	16.2563	303.854
125629	82.46	1.624	14.975		43.1976	16.2563	303.753
125729	82.78	1.624	14.979		43.3652	16.2563	303.834
125830	83.48	1.627	14.98		43.7319	16.2863	303.854
125931	83.52	1.628	14.976		43.7529	16.2963	303.773
126032	83.52	1.628	14.976		43.7529	16.2963	303.773
126133	83.52	1.628	14.976		43.7529	16.2963	303.773
126233	83.74	1.63	14.978		43.8681	16.3163	303.813
126334	83.28	1.632	14.978		43.6272	16.3363	303.813
126435	83.28	1.632	14.978		43.6272	16.3363	303.813
126536	83.74	1.632	14.981		43.8681	16.3363	303.874
126637	83.78	1.636	14.98		43.8891	16.3764	303.854
126738	83.78	1.636	14.98		43.8891	16.3764	303.854
126839	83.36	1.635	14.981		43.6691	16.3664	303.874
126939	84.08	1.637	14.981		44.0463	16.3864	303.874
127040	83.78	1.639	14.975		43.8891	16.4064	303.753
127141	83.78	1.639	14.975		43.8891	16.4064	303.753
127242	84.08	1.639	14.981		44.0463	16.4064	303.874
127343	83.86	1.642	14.981		43.931	16.4364	303.874
127443	83.86	1.642	14.981		43.931	16.4364	303.874
127545	84.06	1.642	14.979		44.0358	16.4364	303.834
127645	84.3	1.645	14.978		44.1615	16.4665	303.813
127746	83.82	1.644	14.978		43.9101	16.4565	303.813
127847	83.92	1.645	14.977		43.9624	16.4665	303.793
127948	84.4	1.646	14.979		44.2139	16.4765	303.834
128049	84.46	1.649	14.976		44.2453	16.5065	303.773
128149	84.04	1.65	14.978		44.0253	16.5165	303.813
128250	84.04	1.65	14.978		44.0253	16.5165	303.813
128351	84.08	1.649	14.979		44.0463	16.5065	303.834
128452	84.08	1.649	14.979		44.0463	16.5065	303.834
128553	82.98	1.655	14.975		43.47	16.5666	303.753
128654	83.3	1.654	14.981		43.6376	16.5566	303.874
128755	84.68	1.656	14.981		44.3606	16.5766	303.874
128855	84.44	1.657	14.977		44.2348	16.5866	303.793
128956	84.44	1.657	14.977		44.2348	16.5866	303.793
129057	84.82	1.658	14.979		44.4339	16.5966	303.834
129158	84.34	1.66	14.977		44.1825	16.6166	303.793
129259	84.34	1.66	14.977		44.1825	16.6166	303.793
129359	84.82	1.661	14.982		44.4339	16.6266	303.895
129461	84.5	1.663	14.977		44.2663	16.6466	303.793
129561	84.5	1.663	14.977		44.2663	16.6466	303.793
129662	84.92	1.664	14.983		44.4863	16.6567	303.915
129763	85.26	1.666	14.981		44.6644	16.6767	303.874
129864	83.54	1.666	14.978		43.7634	16.6767	303.813
129965	83.5	1.666	14.978		43.7424	16.6767	303.813
130065	83.5	1.666	14.978		43.7424	16.6767	303.813
130166	84.18	1.669	14.976		44.0986	16.7067	303.773
130267	83.78	1.669	14.975		43.8891	16.7067	303.753
130368	85.3	1.671	14.979		44.6854	16.7267	303.834
130469	85.06	1.673	14.978		44.5596	16.7467	303.813
130570	85.06	1.673	14.978		44.5596	16.7467	303.813
130671	85.42	1.674	14.977		44.7482	16.7568	303.793
130771	85.46	1.676	14.979		44.7692	16.7768	303.834
130872	85.38	1.677	14.979		44.7273	16.7868	303.834
130973	85.5	1.677	14.981		44.7901	16.7868	303.874
131074	85.66	1.677	14.979		44.874	16.7868	303.834
131175	85.88	1.679	14.978		44.9892	16.8068	303.813
131275	85.36	1.682	14.979		44.7168	16.8368	303.834
131377	85.36	1.682	14.979		44.7168	16.8368	303.834
131477	85.72	1.681	14.983		44.9054	16.8268	303.915
131578	86.18	1.683	14.979		45.1464	16.8468	303.834
131679	83.66	1.688	14.976		43.8262	16.8969	303.773
131780	83.18	1.684	14.979		43.5748	16.8569	303.834
131881	83.18	1.684	14.979		43.5748	16.8569	303.834
131981	83.18	1.684	14.979		43.5748	16.8569	303.834
132082	84.9	1.688	14.975		44.4758	16.8969	303.753
132183	86.04	1.688	14.981		45.073	16.8969	303.874
132284	86.2	1.692	14.977		45.1568	16.9369	303.793
132385	85.28	1.692	14.976		44.6749	16.9369	303.773
132485	85.4	1.691	14.979		44.7378	16.9269	303.834
132587	85.4	1.691	14.979		44.7378	16.9269	303.834
132687	85.64	1.696	14.977		44.8635	16.977	303.793
132788	85.64	1.696	14.977		44.8635	16.977	303.793
132889	86.54	1.696	14.978		45.335	16.977	303.813
132990	86.16	1.698	14.981		45.1359	16.997	303.874
133091	86.18	1.698	14.98		45.1464	16.997	303.854
133191	86.4	1.7	14.979		45.2616	17.017	303.834
133292	86.62	1.7	14.979		45.3769	17.017	303.834
133393	86.78	1.701	14.979		45.4607	17.027	303.834
133494	86.66	1.704	14.979		45.3978	17.0571	303.834
133595	86.58	1.704	14.979		45.3559	17.0571	303.834
133696	86.9	1.705	14.978		45.5235	17.0671	303.813
133797	86.62	1.707	14.98		45.3769	17.0871	303.854
133897	86.42	1.706	14.98		45.2721	17.0771	303.854
133998	86.96	1.707	14.983		45.555	17.0871	303.915
134099	87.22	1.71	14.979		45.6912	17.1171	303.834
134200	85.8	1.71	14.977		44.9473	17.1171	303.793
134301	86.18	1.71	14.983		45.1464	17.1171	303.915
134401	86.18	1.71	14.983		45.1464	17.1171	303.915
134503	86.76	1.714	14.98		45.4502	17.1572	303.854
134603	86.72	1.713	14.978		45.4292	17.1471	303.813
134704	87.42	1.715	14.977		45.796	17.1672	303.793
134805	87.36	1.716	14.978		45.7645	17.1772	303.813
134906	87.24	1.717	14.975		45.7017	17.1872	303.753
135007	87.32	1.717	14.978		45.7436	17.1872	303.813
135107	87.5	1.718	14.979		45.8379	17.1972	303.834
135208	87.5	1.72	14.978		45.8379	17.2172	303.813
135309	87.38	1.721	14.979		45.775	17.2272	303.834
135410	87.58	1.721	14.981		45.8798	17.2272	303.874
135511	87.62	1.723	14.981		45.9007	17.2472	303.874
135612	87.66	1.724	14.978		45.9217	17.2573	303.813
135713	87.72	1.726	14.979		45.9531	17.2773	303.834
135813	86.7	1.726	14.976		45.4188	17.2773	303.773
135914	87.08	1.726	14.982		45.6178	17.2773	303.895
136015	87.96	1.728	14.981		46.0788	17.2973	303.874
136116	87.58	1.73	14.979		45.8798	17.3173	303.834
136217	87.58	1.73	14.979		45.8798	17.3173	303.834
136317	87.9	1.73	14.982		46.0474	17.3173	303.895
136419	88.06	1.734	14.981		46.1312	17.3574	303.874
136519	88.06	1.734	14.981		46.1312	17.3574	303.874
136620	87.78	1.732	14.981		45.9845	17.3373	303.874
136721	88.14	1.737	14.977		46.1731	17.3874	303.793
136822	88.14	1.737	14.977		46.1731	17.3874	303.793
136923	87.78	1.735	14.979		45.9845	17.3674	303.834
137023	88.28	1.739	14.982		46.2465	17.4074	303.895
137124	88.06	1.739	14.975		46.1312	17.4074	303.753
137225	88	1.74	14.976		46.0998	17.4174	303.773
137326	88.22	1.741	14.978		46.215	17.4274	303.813
137427	88.38	1.742	14.977		46.2989	17.4374	303.793
137528	88.3	1.744	14.979		46.2569	17.4575	303.834
137629	88.3	1.744	14.979		46.2569	17.4575	303.834
137729	88.3	1.745	14.978		46.2569	17.4675	303.813
137830	88.64	1.747	14.979		46.4351	17.4875	303.834
137931	87.04	1.747	14.976		45.5969	17.4875	303.773
138032	86.96	1.746	14.981		45.555	17.4775	303.874
138133	88.74	1.749	14.979		46.4874	17.5075	303.834
138233	88.54	1.752	14.979		46.3827	17.5375	303.834
138334	88.54	1.752	14.979		46.3827	17.5375	303.834
138435	88.62	1.752	14.98		46.4246	17.5375	303.854
138536	88.74	1.753	14.98		46.4874	17.5475	303.854
138637	88.74	1.753	14.98		46.4874	17.5475	303.854
138738	88.74	1.755	14.981		46.4874	17.5676	303.874
138839	88.88	1.757	14.98		46.5608	17.5876	303.854
138939	88.9	1.758	14.978		46.5713	17.5976	303.813
139040	88.4	1.758	14.978		46.3093	17.5976	303.813
139141	88.98	1.758	14.978		46.6132	17.5976	303.813
139242	89.1	1.762	14.979		46.676	17.6376	303.834
139343	89.1	1.762	14.979		46.676	17.6376	303.834
139443	89.14	1.761	14.977		46.697	17.6276	303.793
139545	89.5	1.765	14.977		46.8856	17.6677	303.793
139645	88.8	1.764	14.976		46.5189	17.6577	303.773
139746	88.46	1.765	14.979		46.3408	17.6677	303.834
139847	89.38	1.765	14.981		46.8227	17.6677	303.874
139948	89.6	1.769	14.981		46.938	17.7077	303.874
140049	89.6	1.769	14.981		46.938	17.7077	303.874
140149	89.34	1.769	14.979		46.8018	17.7077	303.834
140250	89.6	1.77	14.977		46.938	17.7177	303.793
140351	89.58	1.771	14.979		46.9275	17.7277	303.834
140452	89.6	1.773	14.98		46.938	17.7477	303.854
140553	89.5	1.773	14.978		46.8856	17.7477	303.813
140654	89.5	1.774	14.979		46.8856	17.7578	303.834
140755	89.84	1.775	14.982		47.0637	17.7678	303.895
140855	89.92	1.778	14.979		47.1056	17.7978	303.834
140956	89.16	1.778	14.981		46.7075	17.7978	303.874
141057	89.08	1.777	14.98		46.6656	17.7878	303.854
141158	90.1	1.78	14.982		47.1999	17.8178	303.895
141259	89.86	1.781	14.979		47.0742	17.8278	303.834
141359	89.86	1.781	14.979		47.0742	17.8278	303.834
141461	89.66	1.781	14.979		46.9694	17.8278	303.834
141561	89.66	1.781	14.979		46.9694	17.8278	303.834
141662	89.72	1.785	14.977		47.0008	17.8679	303.793
141763	89.72	1.785	14.977		47.0008	17.8679	303.793
141864	90.08	1.785	14.979		47.1894	17.8679	303.834
141965	90.56	1.788	14.979		47.4409	17.8979	303.834
142065	89.64	1.789	14.976		46.9589	17.9079	303.773
142166	89.64	1.789	14.976		46.9589	17.9079	303.773
142267	89.64	1.789	14.976		46.9589	17.9079	303.773
142368	89.48	1.792	14.977		46.8751	17.9379	303.793
142469	89.48	1.792	14.977		46.8751	17.9379	303.793
142570	90.58	1.794	14.981		47.4514	17.958	303.874
142671	90.56	1.795	14.978		47.4409	17.968	303.813
142771	90.56	1.795	14.978		47.4409	17.968	303.813
142872	90.48	1.795	14.979		47.399	17.968	303.834
142973	90.8	1.798	14.981		47.5666	17.998	303.874
143074	90.36	1.799	14.978		47.3361	18.008	303.813
143175	90.36	1.799	14.978		47.3361	18.008	303.813
143275	90.84	1.801	14.98		47.5876	18.028	303.854
143377	90.98	1.803	14.98		47.6609	18.048	303.854
143477	90.28	1.803	14.978		47.2942	18.048	303.813
143578	90.28	1.803	14.978		47.2942	18.048	303.813
143679	91.12	1.805	14.978		47.7342	18.0681	303.813
143780	91.02	1.806	14.976		47.6819	18.0781	303.773
143881	90.52	1.806	14.976		47.4199	18.0781	303.773
143981	90.96	1.807	14.977		47.6504	18.0881	303.793
144082	91.2	1.808	14.978		47.7761	18.0981	303.813
144183	91.2	1.809	14.977		47.7761	18.1081	303.793
144284	91.26	1.811	14.979		47.8076	18.1281	303.834
144385	91.16	1.812	14.977		47.7552	18.1381	303.793
144485	91.2	1.812	14.977		47.7761	18.1381	303.793
144587	91.2	1.813	14.981		47.7761	18.1481	303.874
144687	91.28	1.813	14.979		47.8181	18.1481	303.834
144788	91.58	1.816	14.981		47.9752	18.1782	303.874
144889	91.48	1.817	14.979		47.9228	18.1882	303.834
144990	91.24	1.817	14.978		47.7971	18.1882	303.813
145091	91.4	1.818	14.978		47.8809	18.1982	303.813
145191	91.62	1.819	14.98		47.9962	18.2082	303.854
145292	91.84	1.82	14.98		48.1114	18.2182	303.854
145393	91.84	1.822	14.977		48.1114	18.2382	303.793
145494	91.08	1.823	14.979		47.7133	18.2482	303.834
145595	91.08	1.823	14.979		47.7133	18.2482	303.834
145696	91.82	1.823	14.979		48.1009	18.2482	303.834
145797	92.16	1.827	14.983		48.2791	18.2883	303.915
145897	92.16	1.827	14.983		48.2791	18.2883	303.915
145998	92.16	1.827	14.983		48.2791	18.2883	303.915
146099	92.24	1.829	14.979		48.321	18.3083	303.834
146200	91.32	1.831	14.979		47.839	18.3283	303.834
146301	91.32	1.831	14.979		47.839	18.3283	303.834
146401	92.2	1.831	14.979		48.3	18.3283	303.834
146503	92.18	1.833	14.978		48.2895	18.3483	303.813
146603	92.18	1.833	14.978		48.2895	18.3483	303.813
146704	91.78	1.833	14.977		48.08	18.3483	303.793
146805	91.78	1.833	14.977		48.08	18.3483	303.793
146906	91.88	1.838	14.978		48.1324	18.3984	303.813
147007	91.6	1.837	14.981		47.9857	18.3884	303.874
147107	92.54	1.838	14.981		48.4781	18.3984	303.874
147208	92.46	1.84	14.977		48.4362	18.4184	303.793
147309	91.6	1.84	14.976		47.9857	18.4184	303.773
147410	91.38	1.841	14.981		47.8704	18.4284	303.874
147511	92.72	1.842	14.981		48.5724	18.4384	303.874
147612	92.6	1.845	14.979		48.5096	18.4685	303.834
147713	92.6	1.845	14.979		48.5096	18.4685	303.834
147813	92.54	1.845	14.979		48.4781	18.4685	303.834
147914	92.8	1.847	14.983		48.6143	18.4885	303.915
148015	92.76	1.848	14.979		48.5934	18.4985	303.834
148116	92.26	1.849	14.979		48.3314	18.5085	303.834
148217	92.6	1.849	14.98		48.5096	18.5085	303.854
148317	93.08	1.85	14.983		48.761	18.5185	303.915
148419	93.2	1.853	14.979		48.8239	18.5485	303.834
148519	92.4	1.853	14.978		48.4048	18.5485	303.813
148620	92.4	1.853	14.978		48.4048	18.5485	303.813
148721	93.06	1.855	14.979		48.7505	18.5686	303.834
148822	92.98	1.857	14.978		48.7086	18.5886	303.813
148923	92.32	1.857	14.977		48.3629	18.5886	303.793
149023	92.24	1.857	14.978		48.321	18.5886	303.813
149124	93.34	1.858	14.98		48.8972	18.5986	303.854
149225	93.4	1.861	14.979		48.9286	18.6286	303.834
149326	92.04	1.861	14.979		48.2162	18.6286	303.834
149427	91.88	1.861	14.98		48.1324	18.6286	303.854
149528	93.36	1.863	14.978		48.9077	18.6486	303.813
149629	93.56	1.865	14.979		49.0125	18.6687	303.834
149729	92.26	1.865	14.976		48.3314	18.6687	303.773
149830	92.44	1.865	14.976		48.4257	18.6687	303.773
149931	93.64	1.867	14.982		49.0544	18.6887	303.895
150032	93.56	1.869	14.979		49.0125	18.7087	303.834
150133	93.56	1.869	14.979		49.0125	18.7087	303.834
150233	93.56	1.869	14.979		49.0125	18.7087	303.834
150334	93.96	1.871	14.981		49.222	18.7287	303.874
150435	92.8	1.873	14.975		48.6143	18.7487	303.753
150536	92.8	1.873	14.975		48.6143	18.7487	303.753
150637	93.72	1.873	14.979		49.0963	18.7487	303.834
150738	93.92	1.876	14.977		49.201	18.7788	303.793
150839	93.92	1.876	14.977		49.201	18.7788	303.793
150939	93.92	1.876	14.977		49.201	18.7788	303.793
151040	94.04	1.879	14.981		49.2639	18.8088	303.874
151141	93.68	1.88	14.979		49.0753	18.8188	303.834
151242	93.68	1.88	14.979		49.0753	18.8188	303.834
151343	93.96	1.88	14.981		49.222	18.8188	303.874
151443	94.18	1.882	14.981		49.3373	18.8388	303.874
151545	94.2	1.884	14.981		49.3477	18.8589	303.874
151645	93.6	1.884	14.98		49.0334	18.8589	303.854
151746	93.24	1.883	14.976		48.8448	18.8488	303.773
151847	94.36	1.885	14.98		49.4315	18.8689	303.854
151948	94.32	1.888	14.981		49.4106	18.8989	303.874
152049	94.32	1.888	14.981		49.4106	18.8989	303.874
152149	94.12	1.888	14.981		49.3058	18.8989	303.874
152250	94.48	1.891	14.98		49.4944	18.9289	303.854
152351	94.48	1.891	14.98		49.4944	18.9289	303.854
152452	94.26	1.891	14.98		49.3792	18.9289	303.854
152553	94.62	1.894	14.981		49.5678	18.959	303.874
152654	94.7	1.894	14.977		49.6097	18.959	303.793
152755	94.56	1.895	14.979		49.5363	18.969	303.834
152855	94.56	1.896	14.978		49.5363	18.979	303.813
152956	94.54	1.897	14.979		49.5258	18.989	303.834
153057	94.56	1.898	14.977		49.5363	18.999	303.793
153158	94.7	1.899	14.977		49.6097	19.009	303.793
153259	94.74	1.9	14.977		49.6306	19.019	303.793
153359	94.92	1.9	14.98		49.7249	19.019	303.854
153461	94.9	1.903	14.979		49.7144	19.049	303.834
153561	94.8	1.904	14.98		49.662	19.0591	303.854
153662	94.8	1.904	14.98		49.662	19.0591	303.854
153763	94.8	1.903	14.979		49.662	19.049	303.834
153864	95.16	1.906	14.98		49.8506	19.0791	303.854
153965	94.72	1.907	14.977		49.6201	19.0891	303.793
154065	94.72	1.907	14.977		49.6201	19.0891	303.793
154166	95.14	1.908	14.981		49.8402	19.0991	303.874
154267	95.36	1.912	14.981		49.9554	19.1391	303.874
154368	95.36	1.912	14.981		49.9554	19.1391	303.874
154469	95.36	1.912	14.981		49.9554	19.1391	303.874
154570	95.32	1.913	14.981		49.9345	19.1491	303.874
154671	95.38	1.915	14.979		49.9659	19.1692	303.834
154771	94.26	1.916	14.981		49.3792	19.1792	303.874
154872	94.34	1.915	14.979		49.4211	19.1692	303.834
154973	94.34	1.915	14.979		49.4211	19.1692	303.834
155074	94.5	1.92	14.978		49.5049	19.2192	303.813
155175	94.5	1.92	14.978		49.5049	19.2192	303.813
155275	95.68	1.92	14.981		50.123	19.2192	303.874
155377	95.42	1.922	14.978		49.9868	19.2392	303.813
155477	95.46	1.922	14.977		50.0078	19.2392	303.793
155578	95.48	1.923	14.978		50.0183	19.2492	303.813
155679	95.7	1.924	14.98		50.1335	19.2593	303.854
155780	95.78	1.926	14.978		50.1754	19.2793	303.813
155881	95.16	1.926	14.979		49.8506	19.2793	303.834
155981	94.8	1.925	14.98		49.662	19.2693	303.854
156082	95.92	1.929	14.981		50.2488	19.3093	303.874
156183	95.7	1.93	14.981		50.1335	19.3193	303.874
156284	95.7	1.93	14.981		50.1335	19.3193	303.874
156385	96.04	1.93	14.977		50.3116	19.3193	303.793
156485	96.1	1.933	14.979		50.3431	19.3493	303.834
156587	95.66	1.934	14.978		50.1126	19.3594	303.813
156687	95.44	1.934	14.978		49.9973	19.3594	303.813
156788	96.08	1.936	14.982		50.3326	19.3794	303.895
156889	96.12	1.937	14.979		50.3535	19.3894	303.834
156990	96.14	1.938	14.979		50.364	19.3994	303.834
157091	95.98	1.938	14.98		50.2802	19.3994	303.854
157191	96.18	1.939	14.978		50.385	19.4094	303.813
157292	96.18	1.94	14.979		50.385	19.4194	303.834
157393	96.28	1.941	14.978		50.4374	19.4294	303.813
157494	96.18	1.941	14.981		50.385	19.4294	303.874
157595	96.4	1.944	14.978		50.5002	19.4595	303.813
157696	96.4	1.945	14.976		50.5002	19.4695	303.773
157797	96.4	1.946	14.979		50.5002	19.4795	303.834
157897	96.48	1.946	14.977		50.5421	19.4795	303.793
157998	96.48	1.947	14.978		50.5421	19.4895	303.813
158099	96.62	1.948	14.98		50.6155	19.4995	303.854
158200	96.7	1.949	14.977		50.6574	19.5095	303.793
158301	96.64	1.951	14.978		50.626	19.5295	303.813
158401	96.7	1.952	14.978		50.6574	19.5395	303.813
158503	96.68	1.953	14.976		50.6469	19.5495	303.773
158603	96.76	1.954	14.978		50.6888	19.5596	303.813
158704	96.76	1.953	14.976		50.6888	19.5495	303.773
158805	96.76	1.955	14.979		50.6888	19.5696	303.834
158906	96.76	1.956	14.978		50.6888	19.5796	303.813
159007	96.76	1.957	14.981		50.6888	19.5896	303.874
159107	96.88	1.958	14.978		50.7517	19.5996	303.813
159208	97.14	1.959	14.977		50.8879	19.6096	303.793
159309	96.88	1.962	14.981		50.7517	19.6396	303.874
159410	96.88	1.962	14.981		50.7517	19.6396	303.874
159511	96.88	1.962	14.981		50.7517	19.6396	303.874
159612	96.88	1.962	14.981		50.7517	19.6396	303.874
159713	96.3	1.965	14.979		50.4478	19.6697	303.834
159813	96.3	1.965	14.979		50.4478	19.6697	303.834
159914	97.16	1.966	14.981		50.8984	19.6797	303.874
160015	97.22	1.969	14.977		50.9298	19.7097	303.793
160116	96.78	1.969	14.978		50.6993	19.7097	303.813
160217	97.08	1.968	14.978		50.8565	19.6997	303.813
160317	97.48	1.971	14.98		51.066	19.7297	303.854
160419	97.42	1.972	14.979		51.0346	19.7397	303.834
160519	97.42	1.972	14.979		51.0346	19.7397	303.834
160620	97.42	1.972	14.979		51.0346	19.7397	303.834
160721	97.42	1.972	14.979		51.0346	19.7397	303.834
160822	97.88	1.977	14.981		51.2755	19.7898	303.874
160923	97.88	1.977	14.981		51.2755	19.7898	303.874
161023	97.88	1.977	14.981		51.2755	19.7898	303.874
161124	97.74	1.979	14.981		51.2022	19.8098	303.874
161225	97.04	1.98	14.977		50.8355	19.8198	303.793
161326	97.54	1.98	14.98		51.0974	19.8198	303.854
161427	97.96	1.983	14.981		51.3174	19.8498	303.874
161528	97.96	1.983	14.981		51.3174	19.8498	303.874
161629	97.7	1.983	14.979		51.1812	19.8498	303.834
161729	98.04	1.986	14.98		51.3594	19.8799	303.854
161830	98.04	1.986	14.98		51.3594	19.8799	303.854
161931	97.64	1.986	14.979		51.1498	19.8799	303.834
162032	98.18	1.988	14.981		51.4327	19.8999	303.874
162133	98.26	1.989	14.979		51.4746	19.9099	303.834
162233	97.54	1.992	14.98		51.0974	19.9399	303.854
162334	97.54	1.992	14.98		51.0974	19.9399	303.854
162435	97.62	1.99	14.98		51.1393	19.9199	303.854
162536	97.62	1.99	14.98		51.1393	19.9199	303.854
162637	97.62	1.99	14.98		51.1393	19.9199	303.854
162738	97.48	1.994	14.978		51.066	19.96	303.813
162839	98.34	1.995	14.981		51.5165	19.97	303.874
162939	98.34	1.998	14.975		51.5165	20	303.753
163040	98.34	1.998	14.975		51.5165	20	303.753
163141	98.38	1.999	14.981		51.5375	20.01	303.874
163242	98.5	2	14.98		51.6003	20.02	303.854
163343	98.58	2	14.979		51.6422	20.02	303.834
163443	98.6	2.006	14.978		51.6527	20.0801	303.813
163545	98.6	2.006	14.978		51.6527	20.0801	303.813
163645	98.6	2.006	14.978		51.6527	20.0801	303.813
163746	98.8	2.006	14.979		51.7575	20.0801	303.834
163847	98.76	2.005	14.977		51.7365	20.0701	303.793
163948	98.76	2.005	14.977		51.7365	20.0701	303.793
164049	98.46	2.007	14.979		51.5794	20.0901	303.834
164149	98.94	2.01	14.979		51.8308	20.1201	303.834
164250	98.94	2.01	14.979		51.8308	20.1201	303.834
164351	98.52	2.01	14.979		51.6108	20.1201	303.834
164452	99.02	2.013	14.979		51.8727	20.1502	303.834
164553	98.94	2.013	14.98		51.8308	20.1502	303.854
164654	98.92	2.014	14.979		51.8204	20.1602	303.834
164755	98.96	2.015	14.979		51.8413	20.1702	303.834
164855	98.98	2.017	14.979		51.8518	20.1902	303.834
164956	99.04	2.017	14.977		51.8832	20.1902	303.793
165057	99.06	2.018	14.981		51.8937	20.2002	303.874
165158	99.04	2.019	14.978		51.8832	20.2102	303.813
165259	99.14	2.019	14.977		51.9356	20.2102	303.793
165359	99.24	2.021	14.979		51.988	20.2302	303.834
165461	99.3	2.022	14.982		52.0194	20.2402	303.895
165561	99.42	2.023	14.978		52.0823	20.2503	303.813
165662	99.14	2.025	14.978		51.9356	20.2703	303.813
165763	99.2	2.025	14.979		51.967	20.2703	303.834
165864	99.38	2.026	14.983		52.0613	20.2803	303.915
165965	99.44	2.027	14.975		52.0928	20.2903	303.753
166065	99.5	2.029	14.98		52.1242	20.3103	303.854
166166	99.3	2.029	14.977		52.0194	20.3103	303.793
166267	99.32	2.029	14.978		52.0299	20.3103	303.813
166368	99.58	2.031	14.975		52.1661	20.3303	303.753
166469	99.76	2.033	14.98		52.2604	20.3504	303.854
166570	99.12	2.034	14.978		51.9251	20.3604	303.813
166671	99.12	2.034	14.978		51.9251	20.3604	303.813
166771	99.7	2.033	14.98		52.229	20.3504	303.854
166872	99.84	2.037	14.978		52.3023	20.3904	303.813
166973	98.98	2.037	14.975		51.8518	20.3904	303.753
167074	99.4	2.037	14.977		52.0718	20.3904	303.793
167175	99.8	2.04	14.981		52.2814	20.4204	303.874
167275	99.78	2.041	14.977		52.2709	20.4304	303.793
167377	99.78	2.041	14.977		52.2709	20.4304	303.793
167477	99.78	2.042	14.981		52.2709	20.4404	303.874
167578	100.12	2.044	14.979		52.449	20.4605	303.834
167679	99.84	2.045	14.977		52.3023	20.4705	303.793
167780	99.84	2.045	14.977		52.3023	20.4705	303.793
167881	99.94	2.045	14.981		52.3547	20.4705	303.874
167981	100.1	2.048	14.98		52.4385	20.5005	303.854
168082	99.42	2.049	14.975		52.0823	20.5105	303.753
168183	99.5	2.048	14.979		52.1242	20.5005	303.834
168284	100.32	2.049	14.977		52.5538	20.5105	303.793
168385	100.38	2.053	14.983		52.5852	20.5506	303.915
168485	99	2.052	14.978		51.8623	20.5405	303.813
168587	98.7	2.052	14.981		51.7051	20.5405	303.874
168687	100.44	2.053	14.979		52.6166	20.5506	303.834
168788	100.38	2.057	14.981		52.5852	20.5906	303.874
168889	100.38	2.057	14.981		52.5852	20.5906	303.874
168990	100.34	2.056	14.98		52.5642	20.5806	303.854
169091	100.5	2.058	14.98		52.6481	20.6006	303.854
169191	100.5	2.06	14.978		52.6481	20.6206	303.813
169292	100.46	2.061	14.979		52.6271	20.6306	303.834
169393	100.24	2.061	14.978		52.5119	20.6306	303.813
169494	100.42	2.061	14.977		52.6061	20.6306	303.793
169595	100.82	2.063	14.977		52.8157	20.6507	303.793
169696	100.54	2.066	14.979		52.669	20.6807	303.834
169797	100.54	2.066	14.979		52.669	20.6807	303.834
169897	100.18	2.065	14.979		52.4804	20.6707	303.834
169998	100.96	2.068	14.979		52.889	20.7007	303.834
170099	100.72	2.069	14.978		52.7633	20.7107	303.813
170200	100.72	2.069	14.978		52.7633	20.7107	303.813
170301	100.6	2.069	14.977		52.7004	20.7107	303.793
170401	100.6	2.069	14.977		52.7004	20.7107	303.793
170503	99.82	2.073	14.979		52.2918	20.7508	303.834
170603	99.82	2.073	14.979		52.2918	20.7508	303.834
170704	101	2.074	14.981		52.91	20.7608	303.874
170805	101.14	2.077	14.979		52.9833	20.7908	303.834
170906	99.82	2.077	14.979		52.2918	20.7908	303.834
171007	100.12	2.076	14.983		52.449	20.7808	303.915
171107	100.12	2.076	14.983		52.449	20.7808	303.915
171208	100.12	2.076	14.983		52.449	20.7808	303.915
171309	100.12	2.076	14.983		52.449	20.7808	303.915
171410	101.34	2.08	14.983		53.0881	20.8208	303.915
171511	101.46	2.083	14.977		53.151	20.8509	303.793
171612	100.58	2.084	14.977		52.69	20.8609	303.793
171713	100.58	2.084	14.977		52.69	20.8609	303.793
171813	101.5	2.085	14.98		53.1719	20.8709	303.854
171914	101.56	2.087	14.98		53.2033	20.8909	303.854
172015	101.3	2.088	14.977		53.0671	20.9009	303.793
172116	100.98	2.088	14.979		52.8995	20.9009	303.834
172217	101.5	2.088	14.978		53.1719	20.9009	303.813
172317	101.6	2.09	14.979		53.2243	20.9209	303.834
172419	101.76	2.092	14.98		53.3081	20.9409	303.854
172519	101.62	2.094	14.979		53.2348	20.961	303.834
172620	101.32	2.093	14.977		53.0776	20.951	303.793
172721	101.5	2.093	14.978		53.1719	20.951	303.813
172822	101.5	2.093	14.978		53.1719	20.951	303.813
172923	101.18	2.098	14.98		53.0043	21.001	303.854
173023	101.18	2.098	14.98		53.0043	21.001	303.854
173124	101.88	2.098	14.98		53.371	21.001	303.854
173225	102.1	2.101	14.978		53.4862	21.031	303.813
173326	101.38	2.101	14.977		53.1091	21.031	303.793
173427	101.38	2.101	14.977		53.1091	21.031	303.793
173528	102.1	2.101	14.981		53.4862	21.031	303.874
173629	102.28	2.105	14.977		53.5805	21.0711	303.793
173729	101.2	2.105	14.975		53.0148	21.0711	303.753
173830	101.2	2.105	14.975		53.0148	21.0711	303.753
173931	102.1	2.106	14.982		53.4862	21.0811	303.895
174032	102.34	2.108	14.978		53.612	21.1011	303.813
174133	101.48	2.11	14.977		53.1614	21.1211	303.793
174233	101.48	2.11	14.977		53.1614	21.1211	303.793
174334	102.32	2.111	14.979		53.6015	21.1311	303.834
174435	102.22	2.113	14.977		53.5491	21.1512	303.793
174536	101.52	2.113	14.978		53.1824	21.1512	303.813
174637	101.48	2.112	14.976		53.1614	21.1411	303.773
174738	102.44	2.114	14.979		53.6643	21.1612	303.834
174839	102.62	2.116	14.979		53.7586	21.1812	303.834
174939	101.92	2.117	14.978		53.3919	21.1912	303.813
175040	101.46	2.116	14.979		53.151	21.1812	303.834
175141	102.64	2.117	14.978		53.7691	21.1912	303.813
175242	102.72	2.121	14.982		53.811	21.2312	303.895
175343	102.72	2.121	14.982		53.811	21.2312	303.895
175443	102.72	2.121	14.982		53.811	21.2312	303.895
175545	102.96	2.123	14.982		53.9368	21.2513	303.895
175645	101.36	2.125	14.975		53.0986	21.2713	303.753
175746	101.46	2.124	14.979		53.151	21.2613	303.834
175847	102.9	2.125	14.977		53.9053	21.2713	303.793
175948	102.54	2.127	14.976		53.7167	21.2913	303.773
176049	102.16	2.127	14.979		53.5177	21.2913	303.834
176149	102.94	2.129	14.982		53.9263	21.3113	303.895
176250	103.08	2.131	14.981		53.9996	21.3313	303.874
176351	102.32	2.13	14.976		53.6015	21.3213	303.773
176452	102.76	2.131	14.981		53.832	21.3313	303.874
176553	103.08	2.134	14.977		53.9996	21.3614	303.793
176654	102.04	2.135	14.977		53.4548	21.3714	303.793
176755	102.48	2.134	14.976		53.6853	21.3614	303.773
176855	103.12	2.136	14.979		54.0206	21.3814	303.834
176956	103.06	2.136	14.978		53.9891	21.3814	303.813
177057	102.82	2.138	14.976		53.8634	21.4014	303.773
177158	102.9	2.138	14.979		53.9053	21.4014	303.834
177259	103.28	2.139	14.982		54.1044	21.4114	303.895
177359	103.42	2.141	14.979		54.1777	21.4314	303.834
177461	103.36	2.143	14.978		54.1463	21.4515	303.813
177561	103.36	2.143	14.978		54.1463	21.4515	303.813
177662	103.36	2.143	14.978		54.1463	21.4515	303.813
177763	103.58	2.146	14.981		54.2615	21.4815	303.874
177864	103.34	2.147	14.977		54.1358	21.4915	303.793
177965	103.34	2.147	14.977		54.1358	21.4915	303.793
178065	103.22	2.146	14.977		54.073	21.4815	303.793
178166	103.72	2.149	14.977		54.3349	21.5115	303.793
178267	102.24	2.151	14.978		53.5596	21.5315	303.813
178368	102.38	2.15	14.979		53.6329	21.5215	303.834
178469	103.7	2.151	14.983		54.3244	21.5315	303.915
178570	103.58	2.154	14.977		54.2615	21.5616	303.793
178671	103.58	2.154	14.977		54.2615	21.5616	303.793
178771	103.68	2.154	14.98		54.3139	21.5616	303.854
178872	103.84	2.158	14.979		54.3978	21.6016	303.834
178973	103.84	2.158	14.979		54.3978	21.6016	303.834
179074	103.84	2.158	14.979		54.3978	21.6016	303.834
179175	103.86	2.159	14.98		54.4082	21.6116	303.854
179275	103.8	2.161	14.979		54.3768	21.6316	303.834
179377	103.8	2.161	14.979		54.3768	21.6316	303.834
179477	103.9	2.161	14.978		54.4292	21.6316	303.813
179578	104.24	2.164	14.976		54.6073	21.6617	303.773
179679	103.8	2.165	14.976		54.3768	21.6717	303.773
179780	103.82	2.165	14.979		54.3873	21.6717	303.834
179881	103.98	2.164	14.979		54.4711	21.6617	303.834
179981	104.26	2.167	14.983		54.6178	21.6917	303.915
180082	104.24	2.169	14.977		54.6073	21.7117	303.793
180183	103.22	2.169	14.978		54.073	21.7117	303.813
180284	103.1	2.169	14.978		54.0101	21.7117	303.813
180385	104.32	2.171	14.98		54.6492	21.7317	303.854
180485	104.56	2.173	14.979		54.7749	21.7518	303.834
180587	103.8	2.174	14.975		54.3768	21.7618	303.753
180687	103.8	2.174	14.975		54.3768	21.7618	303.753
180788	104.26	2.174	14.98		54.6178	21.7618	303.854
180889	104.6	2.177	14.98		54.7959	21.7918	303.854
180990	104.26	2.177	14.979		54.6178	21.7918	303.834
181091	104.18	2.178	14.979		54.5759	21.8018	303.834
181191	104.48	2.179	14.981		54.733	21.8118	303.874
181292	104.68	2.18	14.979		54.8378	21.8218	303.834
181393	104.58	2.181	14.975		54.7854	21.8318	303.753
181494	104.42	2.183	14.979		54.7016	21.8519	303.834
181595	104.3	2.183	14.978		54.6387	21.8519	303.813
181696	104.64	2.183	14.978		54.8168	21.8519	303.813
181797	104.82	2.186	14.977		54.9111	21.8819	303.793
181897	103.94	2.186	14.976		54.4501	21.8819	303.773
181998	103.94	2.186	14.976		54.4501	21.8819	303.773
182099	104.68	2.187	14.98		54.8378	21.8919	303.854
182200	104.86	2.19	14.979		54.9321	21.9219	303.834
182301	104.18	2.19	14.977		54.5759	21.9219	303.793
182401	104.12	2.19	14.978		54.5444	21.9219	303.813
182503	104.82	2.193	14.979		54.9111	21.952	303.834
182603	104.86	2.194	14.979		54.9321	21.962	303.834
182704	104.86	2.194	14.979		54.9321	21.962	303.834
182805	104.92	2.194	14.978		54.9635	21.962	303.813
182906	105.14	2.197	14.98		55.0788	21.992	303.854
183007	105	2.198	14.979		55.0054	22.002	303.834
183107	105	2.198	14.979		55.0054	22.002	303.834
183208	104.8	2.198	14.976		54.9007	22.002	303.773
183309	105.24	2.2	14.982		55.1312	22.022	303.895
183410	103.92	2.202	14.975		54.4397	22.042	303.753
183511	103.92	2.202	14.975		54.4397	22.042	303.753
183612	105.12	2.202	14.981		55.0683	22.042	303.874
183713	105.52	2.205	14.981		55.2778	22.0721	303.874
183813	104.26	2.206	14.978		54.6178	22.0821	303.813
183914	104.26	2.206	14.978		54.6178	22.0821	303.813
184015	105.32	2.207	14.982		55.1731	22.0921	303.895
184116	105.46	2.21	14.979		55.2464	22.1221	303.834
184217	104.12	2.21	14.978		54.5444	22.1221	303.813
184317	104.14	2.209	14.978		54.5549	22.1121	303.813
184419	104.14	2.209	14.978		54.5549	22.1121	303.813
184519	104.6	2.214	14.978		54.7959	22.1622	303.813
184620	104.6	2.214	14.978		54.7959	22.1622	303.813
184721	105.54	2.214	14.982		55.2883	22.1622	303.895
184822	105.76	2.216	14.98		55.4036	22.1822	303.854
184923	105.52	2.217	14.98		55.2778	22.1922	303.854
185023	105.4	2.217	14.975		55.215	22.1922	303.753
185124	105.8	2.218	14.983		55.4245	22.2022	303.915
185225	105	2.221	14.975		55.0054	22.2322	303.753
185326	105	2.221	14.975		55.0054	22.2322	303.753
185427	105.44	2.22	14.98		55.2359	22.2222	303.854
185528	105.78	2.223	14.982		55.414	22.2523	303.895
185629	104.86	2.225	14.977		54.9321	22.2723	303.793
185729	105.02	2.223	14.98		55.0159	22.2523	303.854
185830	106.02	2.226	14.981		55.5398	22.2823	303.874
185931	105.56	2.227	14.978		55.2988	22.2923	303.813
186032	105.56	2.227	14.978		55.2988	22.2923	303.813
186133	105.8	2.227	14.98		55.4245	22.2923	303.854
186233	106.1	2.231	14.977		55.5817	22.3323	303.793
186334	105.78	2.231	14.979		55.414	22.3323	303.834
186435	105.28	2.231	14.978		55.1521	22.3323	303.813
186536	106.04	2.232	14.979		55.5502	22.3423	303.834
186637	106.28	2.234	14.979		55.676	22.3624	303.834
186738	105.8	2.235	14.978		55.4245	22.3724	303.813
186839	105.8	2.235	14.978		55.4245	22.3724	303.813
186939	105.82	2.235	14.979		55.435	22.3724	303.834
187040	105.82	2.235	14.979		55.435	22.3724	303.834
187141	105.82	2.235	14.979		55.435	22.3724	303.834
187242	105.82	2.235	14.979		55.435	22.3724	303.834
187343	105.82	2.235	14.979		55.435	22.3724	303.834
187443	105.34	2.242	14.975		55.1835	22.4424	303.753
187545	105.5	2.241	14.983		55.2674	22.4324	303.915
187645	105.5	2.241	14.983		55.2674	22.4324	303.915
187746	105.44	2.246	14.978		55.2359	22.4825	303.813
187847	105.44	2.246	14.978		55.2359	22.4825	303.813
187948	106.5	2.247	14.977		55.7912	22.4925	303.793
188049	106.5	2.247	14.977		55.7912	22.4925	303.793
188149	106.5	2.247	14.977		55.7912	22.4925	303.793
188250	106.5	2.247	14.977		55.7912	22.4925	303.793
188351	106.08	2.248	14.982		55.5712	22.5025	303.895
188452	106.42	2.252	14.977		55.7493	22.5425	303.793
188553	105.96	2.253	14.978		55.5083	22.5526	303.813
188654	106.6	2.254	14.977		55.8436	22.5626	303.793
188755	106.76	2.256	14.981		55.9274	22.5826	303.874
188855	106.76	2.256	14.981		55.9274	22.5826	303.874
188956	106.64	2.257	14.975		55.8646	22.5926	303.753
189057	106.82	2.258	14.978		55.9589	22.6026	303.813
189158	106.7	2.259	14.975		55.896	22.6126	303.753
189259	106.78	2.259	14.977		55.9379	22.6126	303.793
189359	106.76	2.259	14.977		55.9274	22.6126	303.793
189461	106.72	2.262	14.977		55.9065	22.6426	303.793
189561	106.82	2.262	14.978		55.9589	22.6426	303.813
189662	106.92	2.264	14.98		56.0112	22.6627	303.854
189763	106.76	2.265	14.977		55.9274	22.6727	303.793
189864	106.66	2.265	14.98		55.875	22.6727	303.854
189965	107.02	2.266	14.981		56.0636	22.6827	303.874
190065	107.22	2.268	14.981		56.1684	22.7027	303.874
190166	106.88	2.27	14.979		55.9903	22.7227	303.834
190267	106.88	2.27	14.979		55.9903	22.7227	303.834
190368	107.26	2.271	14.982		56.1894	22.7327	303.895
190469	107.2	2.274	14.979		56.1579	22.7628	303.834
190570	107.2	2.274	14.979		56.1579	22.7628	303.834
190671	107.38	2.273	14.98		56.2522	22.7528	303.854
190771	107.18	2.277	14.977		56.1474	22.7928	303.793
190872	106.92	2.275	14.98		56.0112	22.7728	303.854
190973	107.24	2.277	14.981		56.1789	22.7928	303.874
191074	107.38	2.278	14.979		56.2522	22.8028	303.834
191175	107.54	2.276	14.982		56.336	22.7828	303.895
191275	107.54	2.276	14.982		56.336	22.7828	303.895
191377	103.72	2.28	14.974		54.3349	22.8228	303.732
191477	103.9	2.281	14.981		54.4292	22.8328	303.874
191578	105.76	2.281	14.983		55.4036	22.8328	303.915
191679	105.76	2.281	14.983		55.4036	22.8328	303.915
191780	105.76	2.281	14.983		55.4036	22.8328	303.915
191881	106.52	2.286	14.983		55.8017	22.8829	303.915
191981	106.52	2.286	14.983		55.8017	22.8829	303.915
192082	106.94	2.288	14.977		56.0217	22.9029	303.793
192183	107.64	2.289	14.978		56.3884	22.9129	303.813
192284	107.8	2.291	14.982		56.4722	22.9329	303.895
192385	107.8	2.291	14.982		56.4722	22.9329	303.895
192485	107.78	2.291	14.981		56.4618	22.9329	303.874
192587	107.92	2.293	14.98		56.5351	22.953	303.854
192687	107.92	2.293	14.98		56.5351	22.953	303.854
192788	107.86	2.294	14.978		56.5037	22.963	303.813
192889	107.98	2.297	14.979		56.5665	22.993	303.834
192990	107.64	2.297	14.978		56.3884	22.993	303.813
193091	107.88	2.299	14.978		56.5142	23.013	303.813
193191	107.96	2.299	14.978		56.5561	23.013	303.813
193292	108.02	2.3	14.978		56.5875	23.023	303.813
193393	107.94	2.301	14.978		56.5456	23.033	303.813
193494	108.02	2.302	14.979		56.5875	23.043	303.834
193595	107.94	2.302	14.981		56.5456	23.043	303.874
193696	107.88	2.302	14.982		56.5142	23.043	303.895
193797	108.02	2.304	14.977		56.5875	23.0631	303.793
193897	108.06	2.305	14.98		56.6084	23.0731	303.854
193998	108.12	2.307	14.979		56.6399	23.0931	303.834
194099	108.24	2.307	14.979		56.7027	23.0931	303.834
194200	108.52	2.309	14.979		56.8494	23.1131	303.834
194301	108.36	2.311	14.979		56.7656	23.1331	303.834
194401	108.36	2.311	14.979		56.7656	23.1331	303.834
194503	108.32	2.311	14.979		56.7447	23.1331	303.834
194603	108.5	2.314	14.981		56.8389	23.1632	303.874
194704	108.5	2.314	14.981		56.8389	23.1632	303.874
194805	108.3	2.315	14.982		56.7342	23.1732	303.895
194906	108.66	2.316	14.983		56.9228	23.1832	303.915
195007	108.44	2.318	14.974		56.8075	23.2032	303.732
195107	108.44	2.318	14.974		56.8075	23.2032	303.732
195208	108.6	2.318	14.98		56.8913	23.2032	303.854
195309	108.56	2.321	14.976		56.8704	23.2332	303.773
195410	108.56	2.321	14.976		56.8704	23.2332	303.773
195511	108.64	2.321	14.981		56.9123	23.2332	303.874
195612	108.8	2.324	14.98		56.9961	23.2633	303.854
195713	108.68	2.325	14.98		56.9332	23.2733	303.854
195813	108.68	2.325	14.98		56.9332	23.2733	303.854
195914	108.8	2.325	14.979		56.9961	23.2733	303.834
196015	108.56	2.328	14.979		56.8704	23.3033	303.834
196116	108.56	2.328	14.979		56.8704	23.3033	303.834
196217	108.96	2.329	14.982		57.0799	23.3133	303.895
196317	108.88	2.331	14.98		57.038	23.3333	303.854
196419	108.88	2.331	14.98		57.038	23.3333	303.854
196519	108.96	2.332	14.978		57.0799	23.3433	303.813
196620	109.12	2.334	14.976		57.1637	23.3634	303.773
196721	108.8	2.334	14.977		56.9961	23.3634	303.793
196822	108.8	2.334	14.979		56.9961	23.3634	303.834
196923	109.12	2.336	14.981		57.1637	23.3834	303.874
197023	109.22	2.339	14.978		57.2161	23.4134	303.813
197124	108.86	2.339	14.977		57.0275	23.4134	303.793
197225	108.86	2.339	14.977		57.0275	23.4134	303.793
197326	109.04	2.339	14.981		57.1218	23.4134	303.874
197427	109.44	2.342	14.981		57.3314	23.4434	303.874
197528	108.3	2.343	14.977		56.7342	23.4535	303.793
197629	108.3	2.343	14.977		56.7342	23.4535	303.793
197729	109.32	2.343	14.979		57.2685	23.4535	303.834
197830	109.14	2.347	14.977		57.1742	23.4935	303.793
197931	109.14	2.347	14.977		57.1742	23.4935	303.793
198032	109.36	2.347	14.98		57.2895	23.4935	303.854
198133	109.56	2.35	14.977		57.3942	23.5235	303.793
198233	109.16	2.35	14.977		57.1847	23.5235	303.793
198334	108.82	2.35	14.979		57.0066	23.5235	303.834
198435	109.48	2.351	14.981		57.3523	23.5335	303.874
198536	109.64	2.353	14.979		57.4361	23.5536	303.834
198637	109.28	2.354	14.979		57.2476	23.5636	303.834
198738	108.92	2.354	14.978		57.059	23.5636	303.813
198839	109.72	2.354	14.978		57.4781	23.5636	303.813
198939	109.78	2.358	14.978		57.5095	23.6036	303.813
199040	109.78	2.358	14.978		57.5095	23.6036	303.813
199141	109.78	2.358	14.978		57.5095	23.6036	303.813
199242	109.88	2.36	14.981		57.5619	23.6236	303.874
199343	109.06	2.361	14.975		57.1323	23.6336	303.753
199443	109.06	2.361	14.975		57.1323	23.6336	303.753
199545	109.96	2.363	14.98		57.6038	23.6537	303.854
199645	109.82	2.364	14.976		57.5304	23.6637	303.773
199746	109.5	2.364	14.977		57.3628	23.6637	303.793
199847	109.86	2.365	14.978		57.5514	23.6737	303.813
199948	109.88	2.366	14.977		57.5619	23.6837	303.793
200049	110.06	2.369	14.979		57.6562	23.7137	303.834
200149	109.58	2.369	14.977		57.4047	23.7137	303.793
200250	109.58	2.369	14.977		57.4047	23.7137	303.793
200351	109.84	2.368	14.98		57.5409	23.7037	303.854
200452	109.84	2.368	14.98		57.5409	23.7037	303.854
200553	108.76	2.374	14.977		56.9752	23.7638	303.793
200654	108.76	2.374	14.977		56.9752	23.7638	303.793
200755	108.76	2.374	14.977		56.9752	23.7638	303.793
200855	108.76	2.374	14.977		56.9752	23.7638	303.793
200956	108.98	2.375	14.979		57.0904	23.7738	303.834
201057	110.34	2.376	14.982		57.8029	23.7838	303.895
201158	110.32	2.379	14.978		57.7924	23.8138	303.813
201259	110.24	2.379	14.979		57.7505	23.8138	303.834
201359	110.24	2.381	14.981		57.7505	23.8338	303.874
201461	110.26	2.381	14.976		57.7609	23.8338	303.773
201561	110.32	2.382	14.977		57.7924	23.8438	303.793
201662	110.38	2.383	14.977		57.8238	23.8539	303.793
201763	110.42	2.385	14.976		57.8448	23.8739	303.773
201864	110.46	2.386	14.981		57.8657	23.8839	303.874
201965	110.44	2.387	14.98		57.8552	23.8939	303.854
202065	110.48	2.387	14.978		57.8762	23.8939	303.813
202166	110.52	2.389	14.979		57.8971	23.9139	303.834
202267	110.48	2.39	14.98		57.8762	23.9239	303.854
202368	110.5	2.39	14.978		57.8867	23.9239	303.813
202469	110.62	2.391	14.979		57.9495	23.9339	303.834
202570	110.62	2.392	14.977		57.9495	23.9439	303.793
202671	110.72	2.394	14.979		58.0019	23.964	303.834
202771	110.7	2.395	14.98		57.9914	23.974	303.854
202872	110.74	2.395	14.98		58.0124	23.974	303.854
202973	110.72	2.396	14.979		58.0019	23.984	303.834
203074	110.82	2.397	14.981		58.0543	23.994	303.874
203175	110.88	2.399	14.979		58.0857	24.014	303.834
203275	110.9	2.4	14.981		58.0962	24.024	303.874
203377	110.92	2.401	14.982		58.1067	24.034	303.895
203477	110.78	2.402	14.979		58.0333	24.044	303.834
203578	110.7	2.403	14.979		57.9914	24.0541	303.834
203679	110.84	2.403	14.978		58.0648	24.0541	303.813
203780	111.04	2.404	14.978		58.1696	24.0641	303.813
203881	111.16	2.406	14.98		58.2324	24.0841	303.854
203981	111.24	2.408	14.975		58.2743	24.1041	303.753
204082	111.24	2.408	14.975		58.2743	24.1041	303.753
204183	111.24	2.408	14.975		58.2743	24.1041	303.753
204284	111.36	2.411	14.981		58.3372	24.1341	303.874
204385	109.48	2.411	14.979		57.3523	24.1341	303.834
204485	109.72	2.41	14.98		57.4781	24.1241	303.854
204587	111.32	2.412	14.981		58.3162	24.1441	303.874
204687	111.16	2.415	14.979		58.2324	24.1742	303.834
204788	111.16	2.415	14.979		58.2324	24.1742	303.834
204889	110.92	2.414	14.982		58.1067	24.1642	303.895
204990	110.92	2.414	14.982		58.1067	24.1642	303.895
205091	110.98	2.419	14.977		58.1381	24.2142	303.793
205191	110.98	2.419	14.977		58.1381	24.2142	303.793
205292	111.28	2.418	14.977		58.2953	24.2042	303.793
205393	111.66	2.422	14.979		58.4943	24.2442	303.834
205494	110.92	2.423	14.98		58.1067	24.2543	303.854
205595	110.92	2.423	14.98		58.1067	24.2543	303.854
205696	111.74	2.424	14.986		58.5363	24.2643	303.976
205797	111.28	2.426	14.977		58.2953	24.2843	303.793
205897	111.28	2.426	14.977		58.2953	24.2843	303.793
205998	111.72	2.427	14.981		58.5258	24.2943	303.874
206099	111.44	2.429	14.978		58.3791	24.3143	303.813
206200	111.44	2.429	14.978		58.3791	24.3143	303.813
206301	111.8	2.43	14.982		58.5677	24.3243	303.895
206401	111.16	2.433	14.979		58.2324	24.3544	303.834
206503	111.16	2.433	14.979		58.2324	24.3544	303.834
206603	111.16	2.433	14.979		58.2324	24.3544	303.834
206704	111.2	2.434	14.977		58.2534	24.3644	303.793
206805	111.78	2.434	14.979		58.5572	24.3644	303.834
206906	111.74	2.437	14.977		58.5363	24.3944	303.793
207007	111.6	2.437	14.983		58.4629	24.3944	303.915
207107	111.48	2.439	14.979		58.4001	24.4144	303.834
207208	111.8	2.438	14.976		58.5677	24.4044	303.773
207309	112	2.441	14.979		58.6725	24.4344	303.834
207410	111.4	2.441	14.978		58.3581	24.4344	303.813
207511	111.4	2.441	14.978		58.3581	24.4344	303.813
207612	111.4	2.441	14.978		58.3581	24.4344	303.813
207713	111.46	2.445	14.98		58.3896	24.4745	303.854
207813	111.46	2.445	14.98		58.3896	24.4745	303.854
207914	111.46	2.445	14.98		58.3896	24.4745	303.854
208015	111.12	2.448	14.98		58.2115	24.5045	303.854
208116	111.12	2.448	14.98		58.2115	24.5045	303.854
208217	112.22	2.45	14.982		58.7877	24.5245	303.895
208317	111.94	2.451	14.975		58.641	24.5345	303.753
208419	111.94	2.451	14.975		58.641	24.5345	303.753
208519	112.42	2.452	14.979		58.8925	24.5445	303.834
208620	111.24	2.454	14.975		58.2743	24.5646	303.753
208721	111.24	2.454	14.975		58.2743	24.5646	303.753
208822	111.24	2.454	14.975		58.2743	24.5646	303.753
208923	111.16	2.457	14.977		58.2324	24.5946	303.793
209023	111.16	2.457	14.977		58.2324	24.5946	303.793
209124	112.38	2.459	14.98		58.8715	24.6146	303.854
209225	111.98	2.46	14.977		58.662	24.6246	303.793
209326	111.98	2.46	14.977		58.662	24.6246	303.793
209427	112.56	2.462	14.98		58.9658	24.6446	303.854
209528	112.06	2.463	14.979		58.7039	24.6547	303.834
209629	112.06	2.463	14.979		58.7039	24.6547	303.834
209729	112.06	2.463	14.979		58.7039	24.6547	303.834
209830	111.08	2.467	14.977		58.1905	24.6947	303.793
209931	111.08	2.467	14.977		58.1905	24.6947	303.793
210032	111.08	2.467	14.977		58.1905	24.6947	303.793
210133	111.5	2.468	14.977		58.4105	24.7047	303.793
210233	111.94	2.468	14.979		58.641	24.7047	303.834
210334	112.68	2.47	14.98		59.0287	24.7247	303.854
210435	112.3	2.471	14.978		58.8296	24.7347	303.813
210536	111.86	2.471	14.977		58.5991	24.7347	303.793
210637	111.86	2.471	14.977		58.5991	24.7347	303.793
210738	111.96	2.474	14.977		58.6515	24.7648	303.793
210839	111.96	2.474	14.977		58.6515	24.7648	303.793
210939	113.02	2.476	14.981		59.2068	24.7848	303.874
211040	112.56	2.479	14.976		58.9658	24.8148	303.773
211141	112.56	2.479	14.976		58.9658	24.8148	303.773
211242	112.96	2.479	14.981		59.1754	24.8148	303.874
211343	112.32	2.481	14.973		58.8401	24.8348	303.712
211443	112.32	2.481	14.973		58.8401	24.8348	303.712
211545	112.32	2.481	14.973		58.8401	24.8348	303.712
211645	112.24	2.485	14.978		58.7982	24.8749	303.813
211746	112.24	2.485	14.978		58.7982	24.8749	303.813
211847	112.98	2.486	14.979		59.1858	24.8849	303.834
211948	112.68	2.489	14.978		59.0287	24.9149	303.813
212049	112.68	2.489	14.978		59.0287	24.9149	303.813
212149	112.68	2.489	14.978		59.0287	24.9149	303.813
212250	112.1	2.49	14.978		58.7248	24.9249	303.813
212351	112.1	2.49	14.978		58.7248	24.9249	303.813
212452	113.24	2.491	14.983		59.322	24.9349	303.915
212553	113	2.494	14.979		59.1963	24.965	303.834
212654	113	2.494	14.979		59.1963	24.965	303.834
212755	112.52	2.494	14.98		58.9449	24.965	303.854
212855	112.52	2.494	14.98		58.9449	24.965	303.854
212956	112.52	2.494	14.98		58.9449	24.965	303.854
213057	112.96	2.497	14.978		59.1754	24.995	303.813
213158	113.4	2.499	14.98		59.4059	25.015	303.854
213259	112.94	2.5	14.975		59.1649	25.025	303.753
213359	112.94	2.5	14.975		59.1649	25.025	303.753
213461	113.5	2.502	14.981		59.4583	25.045	303.874
213561	113.58	2.504	14.977		59.5002	25.0651	303.793
213662	113.58	2.504	14.977		59.5002	25.0651	303.793
213763	113.58	2.504	14.977		59.5002	25.0651	303.793
213864	113.58	2.507	14.977		59.5002	25.0951	303.793
213965	113.58	2.507	14.977		59.5002	25.0951	303.793
214065	113.24	2.506	14.982		59.322	25.0851	303.895
214166	113.58	2.51	14.978		59.5002	25.1251	303.813
214267	113.58	2.51	14.978		59.5002	25.1251	303.813
214368	113.58	2.51	14.978		59.5002	25.1251	303.813
214469	113.86	2.513	14.981		59.6468	25.1552	303.874
214570	112.24	2.514	14.977		58.7982	25.1652	303.793
214671	112.42	2.511	14.98		58.8925	25.1351	303.854
214771	112.42	2.511	14.98		58.8925	25.1351	303.854
214872	112.22	2.516	14.978		58.7877	25.1852	303.813
214973	113	2.516	14.98		59.1963	25.1852	303.854
215074	113.98	2.519	14.976		59.7097	25.2152	303.773
215175	113.88	2.519	14.979		59.6573	25.2152	303.834
[truncated: 3,303 more rows]

## Sheet: GD-4-3
Force (large)	--	journey	) Results Report
17:21:53,06/23/2019
Diameter: 49.4	mm	Height: 100.3	mm
Vertical force transducer (Test piece vertical force)
Control mode: force/confining pressure	Waveform: Slope
KN/s	Force the finish: 5.860	KN	Confining pressure rate :0.500	MPa/s	End point of confining pressure :3.0230	MPa
Time (ms)	Vertical force (KN)	Vertical deformation (mm)	Confining pressure (MPa)		stress	Axial strain	Lateral strain
0	0	0	0		0	0	0
200	0	-0.001	0		0	-0.00997009	0
400	0	0	0		0	0	0
600	0.36	0	0.005		0.185567	0	0.100604
800	0.62	0	0.012		0.319587	0	0.241449
1000	0.66	0	0.017		0.340205	0	0.342052
1200	0.78	0.002	0.033		0.402061	0.0199402	0.663984
1400	0.88	0.002	0.051		0.453607	0.0199402	1.02616
1600	1.16	0.006	0.072		0.597937	0.0598205	1.44869
1800	1.32	0.015	0.103		0.680411	0.149551	2.07243
2000	1.48	0.026	0.154		0.762885	0.259222	3.09859
2200	1.7	0.043	0.204		0.876287	0.428714	4.10463
2400	1.92	0.056	0.25		0.989689	0.558325	5.03018
2600	2.02	0.067	0.291		1.04123	0.667996	5.85513
2800	2.24	0.087	0.324		1.15464	0.867398	6.51911
3000	2.52	0.107	0.356		1.29897	1.0668	7.16298
3200	2.78	0.126	0.374		1.43299	1.25623	7.52515
3400	3.06	0.151	0.39		1.57732	1.50548	7.84708
3600	3.36	0.169	0.405		1.73196	1.68495	8.14889
3800	3.62	0.184	0.427		1.86598	1.8345	8.59155
4000	3.72	0.19	0.454		1.91752	1.89432	9.13481
4200	3.94	0.199	0.492		2.03092	1.98405	9.8994
4400	4.1	0.205	0.543		2.1134	2.04387	10.9256
4600	4.3	0.211	0.622		2.21649	2.10369	12.5151
4800	4.52	0.219	0.746		2.32989	2.18345	15.0101
5000	4.66	0.227	0.976		2.40206	2.26321	19.6378
5200	5.06	0.23	1.488		2.60824	2.29312	29.9396
5400	5.3	0.239	2.175		2.73195	2.38285	43.7626
5600	5.24	0.241	2.46		2.70103	2.40279	49.497
5800	5.42	0.239	2.623		2.79381	2.38285	52.7767
6000	5.52	0.245	2.965		2.84535	2.44267	59.6579
6200	5.86	0.247	3.023		3.02061	2.46261	60.8249
控制模式:围压	波形:斜坡					0
MPa/s	终点:2.9900	MPa				#VALUE!
时间(ms)	垂直力(KN)	垂直变形(mm)	围压(MPa)			#VALUE!
6350	6.02	0.254	2.977		3.10309	2.5324	59.8994
6451	6.06	0.255	2.957		3.1237	2.54237	59.497
6552	6.12	0.254	2.959		3.15463	2.5324	59.5372
6653	6.14	0.259	2.975		3.16494	2.58225	59.8592
6754	6.26	0.261	2.99		3.2268	2.60219	60.161
控制模式:行程	波形:斜坡					0
mm/s	终点:2.1740	mm				#VALUE!
时间(ms)	垂直力(KN)	垂直变形(mm)	围压(MPa)			#VALUE!
6824	6.12	0.263	2.999		3.15463	2.62213	60.3421
6924	6.12	0.263	2.999		3.15463	2.62213	60.3421
7024	6.54	0.265	2.998		3.37113	2.64207	60.3219
7125	5.98	0.268	2.997		3.08247	2.67198	60.3018
7226	5.98	0.268	2.997		3.08247	2.67198	60.3018
7327	5.76	0.266	2.997		2.96907	2.65204	60.3018
7428	5.76	0.266	2.997		2.96907	2.65204	60.3018
7528	5.82	0.269	2.997		2.99999	2.68195	60.3018
7628	6.44	0.271	2.999		3.31958	2.70189	60.3421
7728	6.44	0.271	2.999		3.31958	2.70189	60.3421
7829	6.48	0.272	2.997		3.3402	2.71186	60.3018
7930	6.7	0.274	2.995		3.4536	2.7318	60.2616
8030	5.64	0.274	2.999		2.90721	2.7318	60.3421
8130	5.86	0.274	2.997		3.02061	2.7318	60.3018
8230	5.86	0.274	2.997		3.02061	2.7318	60.3018
8331	5.98	0.279	2.998		3.08247	2.78166	60.3219
8432	5.98	0.279	2.998		3.08247	2.78166	60.3219
8532	5.98	0.279	2.998		3.08247	2.78166	60.3219
8632	6.22	0.282	2.995		3.20618	2.81157	60.2616
8732	6.22	0.282	2.995		3.20618	2.81157	60.2616
8833	6.88	0.282	2.997		3.54638	2.81157	60.3018
8934	6.9	0.286	2.998		3.55669	2.85145	60.3219
9035	6.9	0.286	2.998		3.55669	2.85145	60.3219
9136	6.42	0.284	2.997		3.30927	2.83151	60.3018
9236	7.1	0.287	2.999		3.65979	2.86142	60.3421
9336	6.76	0.289	2.999		3.48453	2.88136	60.3421
9436	6.76	0.289	2.999		3.48453	2.88136	60.3421
9537	7.2	0.289	2.999		3.71133	2.88136	60.3421
9638	7.24	0.293	2.995		3.73195	2.92124	60.2616
9738	7.24	0.293	2.995		3.73195	2.92124	60.2616
9838	6.96	0.291	2.998		3.58762	2.9013	60.3219
9938	7.32	0.295	2.999		3.77319	2.94118	60.3421
10039	7.06	0.295	2.995		3.63917	2.94118	60.2616
10140	7.06	0.295	2.995		3.63917	2.94118	60.2616
10240	7.42	0.295	2.999		3.82473	2.94118	60.3421
10340	7.46	0.298	2.999		3.84535	2.97109	60.3421
10440	7.14	0.299	2.999		3.6804	2.98106	60.3421
10541	7.14	0.299	2.999		3.6804	2.98106	60.3421
10642	7.6	0.3	2.998		3.91752	2.99103	60.3219
10743	7.62	0.302	2.999		3.92783	3.01097	60.3421
10844	6.98	0.303	2.999		3.59793	3.02094	60.3421
10944	6.98	0.303	2.999		3.59793	3.02094	60.3421
11044	7.72	0.304	2.999		3.97937	3.03091	60.3421
11144	7.76	0.307	2.998		3.99999	3.06082	60.3219
11245	7.76	0.307	2.998		3.99999	3.06082	60.3219
11346	7.76	0.307	2.998		3.99999	3.06082	60.3219
11446	7.86	0.31	2.997		4.05154	3.09073	60.3018
11546	6.86	0.31	2.995		3.53607	3.09073	60.2616
11646	6.36	0.309	2.995		3.27834	3.08076	60.2616
11747	8.04	0.311	2.997		4.14432	3.1007	60.3018
11848	7.76	0.315	2.997		3.99999	3.14058	60.3018
11948	6.86	0.313	2.996		3.53607	3.12064	60.2817
12048	7.28	0.313	2.999		3.75257	3.12064	60.3421
12148	7.28	0.313	2.999		3.75257	3.12064	60.3421
12249	7.38	0.318	2.996		3.80412	3.17049	60.2817
12350	7.38	0.318	2.996		3.80412	3.17049	60.2817
12451	7.38	0.318	2.996		3.80412	3.17049	60.2817
12552	7.56	0.321	3.001		3.8969	3.2004	60.3823
12652	7.56	0.321	3.001		3.8969	3.2004	60.3823
12752	8.2	0.321	2.997		4.2268	3.2004	60.3018
12852	8.36	0.324	2.999		4.30927	3.23031	60.3421
12953	7.54	0.324	2.998		3.88659	3.23031	60.3219
13054	7.32	0.323	2.994		3.77319	3.22034	60.2414
13154	8.54	0.327	2.994		4.40205	3.26022	60.2414
13254	8.94	0.327	2.996		4.60824	3.26022	60.2817
13354	8.38	0.33	2.999		4.31958	3.29013	60.3421
13455	6.48	0.33	2.997		3.3402	3.29013	60.3018
13556	6.98	0.325	2.998		3.59793	3.24028	60.3219
13656	7.9	0.331	2.996		4.07216	3.3001	60.2817
13756	8.3	0.331	2.998		4.27834	3.3001	60.3219
13856	8.3	0.331	2.998		4.27834	3.3001	60.3219
13957	7.02	0.336	2.997		3.61855	3.34995	60.3018
14058	6.56	0.333	2.996		3.38144	3.32004	60.2817
14159	8.8	0.335	2.998		4.53607	3.33998	60.3219
14260	8.42	0.337	3.001		4.3402	3.35992	60.3823
14360	8.12	0.337	2.995		4.18556	3.35992	60.2616
14460	9.02	0.339	3.001		4.64947	3.37986	60.3823
14560	9.3	0.339	2.999		4.7938	3.37986	60.3421
14661	9	0.343	2.995		4.63917	3.41974	60.2616
14762	6.72	0.34	2.995		3.46391	3.38983	60.2616
14862	6.64	0.343	2.998		3.42267	3.41974	60.3219
14962	7.36	0.341	2.998		3.79381	3.3998	60.3219
15062	7.36	0.341	2.998		3.79381	3.3998	60.3219
15163	8.26	0.344	2.999		4.25772	3.42971	60.3421
15264	9.28	0.346	2.998		4.78349	3.44965	60.3219
15364	9.5	0.349	3		4.8969	3.47956	60.3622
15464	9.5	0.349	3		4.8969	3.47956	60.3622
15564	9.5	0.349	3		4.8969	3.47956	60.3622
15665	9.4	0.351	2.998		4.84535	3.4995	60.3219
15766	8.22	0.353	2.998		4.2371	3.51944	60.3219
15867	8.22	0.353	2.998		4.2371	3.51944	60.3219
15968	9.52	0.353	2.999		4.90721	3.51944	60.3421
16068	9.68	0.356	2.997		4.98968	3.54935	60.3018
16168	8.34	0.357	2.998		4.29896	3.55932	60.3219
16268	8.6	0.356	2.997		4.43298	3.54935	60.3018
16369	8.6	0.356	2.997		4.43298	3.54935	60.3018
16470	9.08	0.361	2.996		4.6804	3.5992	60.2817
16570	9.08	0.361	2.996		4.6804	3.5992	60.2817
16670	9.68	0.359	2.997		4.98968	3.57926	60.3018
16770	9.9	0.363	2.998		5.10308	3.61914	60.3219
16871	9.54	0.363	3		4.91752	3.61914	60.3622
16972	9.6	0.363	2.994		4.94844	3.61914	60.2414
17072	9.6	0.363	2.994		4.94844	3.61914	60.2414
17172	9.54	0.367	2.998		4.91752	3.65902	60.3219
17272	9.54	0.367	2.998		4.91752	3.65902	60.3219
17373	10	0.366	2.999		5.15463	3.64905	60.3421
17474	10.3	0.37	3		5.30927	3.68893	60.3622
17574	9.24	0.37	2.996		4.76288	3.68893	60.2817
17674	9.24	0.37	2.996		4.76288	3.68893	60.2817
17774	10.4	0.371	2.995		5.36081	3.6989	60.2616
17875	10.16	0.374	2.997		5.2371	3.72881	60.3018
17976	10.16	0.374	2.997		5.2371	3.72881	60.3018
18077	10.1	0.373	2.998		5.20617	3.71884	60.3219
18178	10.5	0.378	2.999		5.41236	3.76869	60.3421
18278	9.86	0.377	2.997		5.08246	3.75872	60.3018
18378	9.86	0.377	2.997		5.08246	3.75872	60.3018
18478	10.38	0.378	2.997		5.3505	3.76869	60.3018
18579	10.6	0.381	2.997		5.46391	3.7986	60.3018
18680	9.46	0.381	2.998		4.87628	3.7986	60.3219
18780	9.64	0.379	2.999		4.96906	3.77866	60.3421
18880	9.64	0.379	2.999		4.96906	3.77866	60.3421
18980	10.08	0.385	2.993		5.19587	3.83848	60.2213
19081	10.08	0.385	2.993		5.19587	3.83848	60.2213
19182	10.78	0.385	2.996		5.55669	3.83848	60.2817
19282	10.84	0.388	2.998		5.58762	3.86839	60.3219
19382	10.24	0.388	2.999		5.27834	3.86839	60.3421
19482	9.76	0.387	2.997		5.03092	3.85842	60.3018
19583	10.96	0.389	2.995		5.64947	3.87836	60.2616
19684	11.08	0.393	2.999		5.71133	3.91825	60.3421
19785	9.86	0.392	2.997		5.08246	3.90828	60.3018
19886	9.64	0.391	2.998		4.96906	3.89831	60.3219
19986	11.18	0.393	2.999		5.76287	3.91825	60.3421
20086	11.32	0.396	2.998		5.83504	3.94816	60.3219
20186	9.82	0.396	2.997		5.06184	3.94816	60.3018
20287	10.1	0.396	2.998		5.20617	3.94816	60.3219
20388	10.1	0.396	2.998		5.20617	3.94816	60.3219
20488	10.1	0.396	2.998		5.20617	3.94816	60.3219
20588	9.8	0.398	2.998		5.05154	3.9681	60.3219
20688	11.38	0.401	3.001		5.86597	3.99801	60.3823
20789	11.62	0.405	2.997		5.98968	4.03789	60.3018
20890	9.98	0.403	2.994		5.14432	4.01795	60.2414
20990	10.28	0.402	2.999		5.29896	4.00798	60.3421
21090	11.6	0.404	2.997		5.97937	4.02792	60.3018
21190	11.26	0.407	2.997		5.80411	4.05783	60.3018
21291	11.26	0.407	2.997		5.80411	4.05783	60.3018
21392	11.52	0.407	2.995		5.93813	4.05783	60.2616
21493	11.86	0.409	3.001		6.11339	4.07777	60.3823
21594	10.1	0.41	2.995		5.20617	4.08774	60.2616
21694	10.14	0.409	2.997		5.22679	4.07777	60.3018
21794	11.88	0.411	2.995		6.1237	4.09771	60.2616
21894	11.66	0.414	2.996		6.0103	4.12762	60.2817
21995	11.66	0.414	2.996		6.0103	4.12762	60.2817
22096	11.68	0.413	2.996		6.02061	4.11765	60.2817
22196	12.08	0.417	2.998		6.22679	4.15753	60.3219
22296	11.3	0.418	2.996		5.82473	4.1675	60.2817
22396	10.92	0.417	2.998		5.62885	4.15753	60.3219
22497	12.16	0.421	2.997		6.26803	4.19741	60.3018
22598	12.12	0.421	2.997		6.24741	4.19741	60.3018
22698	11.3	0.422	2.999		5.82473	4.20738	60.3421
22798	11.18	0.419	2.998		5.76287	4.17747	60.3219
22898	12.38	0.422	2.998		6.38143	4.20738	60.3219
22999	12.38	0.425	3		6.38143	4.23729	60.3622
23100	11.24	0.425	2.998		5.7938	4.23729	60.3219
23201	11.28	0.424	2.998		5.81442	4.22732	60.3219
23302	12.6	0.426	2.997		6.49483	4.24726	60.3018
23402	12.22	0.429	2.997		6.29896	4.27717	60.3018
23502	12.22	0.429	2.997		6.29896	4.27717	60.3018
23602	12.68	0.43	3.001		6.53607	4.28714	60.3823
23703	12.7	0.433	2.997		6.54638	4.31705	60.3018
23804	12.7	0.433	2.997		6.54638	4.31705	60.3018
23904	12.7	0.433	2.997		6.54638	4.31705	60.3018
24004	12.98	0.435	2.996		6.69071	4.33699	60.2817
24104	12.3	0.435	2.997		6.34019	4.33699	60.3018
24205	11.8	0.434	2.996		6.08246	4.32702	60.2817
24306	13.04	0.437	2.997		6.72164	4.35693	60.3018
24406	13.02	0.439	2.998		6.71133	4.37687	60.3219
24506	11.62	0.438	2.997		5.98968	4.3669	60.3018
24606	11.98	0.439	2.998		6.17524	4.37687	60.3219
24707	13.16	0.44	2.999		6.78349	4.38684	60.3421
24808	13.08	0.444	2.997		6.74225	4.42672	60.3018
24909	13.08	0.444	2.997		6.74225	4.42672	60.3018
25010	12.8	0.443	2.998		6.59792	4.41675	60.3219
25110	13.32	0.446	2.996		6.86596	4.44666	60.2817
25210	13.32	0.447	2.999		6.86596	4.45663	60.3421
25310	13.32	0.447	2.999		6.86596	4.45663	60.3421
25411	12.84	0.446	2.996		6.61854	4.44666	60.2817
25512	12.84	0.446	2.996		6.61854	4.44666	60.2817
25612	12.86	0.451	2.996		6.62885	4.49651	60.2817
25712	12.86	0.451	2.996		6.62885	4.49651	60.2817
25812	13.56	0.451	2.999		6.98968	4.49651	60.3421
25913	13.76	0.454	2.997		7.09277	4.52642	60.3018
26014	13.76	0.454	2.997		7.09277	4.52642	60.3018
26114	13.76	0.454	2.997		7.09277	4.52642	60.3018
26214	13.88	0.457	2.997		7.15462	4.55633	60.3018
26314	13.48	0.458	2.994		6.94844	4.5663	60.2414
26415	13.48	0.458	2.994		6.94844	4.5663	60.2414
26516	13.76	0.457	2.996		7.09277	4.55633	60.2817
26617	14.06	0.461	2.997		7.24741	4.59621	60.3018
26718	12.9	0.462	2.997		6.64947	4.60618	60.3018
26818	13.24	0.461	2.995		6.82473	4.59621	60.2616
26918	14.18	0.463	2.996		7.30926	4.61615	60.2817
27018	14.26	0.465	2.997		7.3505	4.63609	60.3018
27119	14.26	0.465	2.997		7.3505	4.63609	60.3018
27220	14.26	0.465	2.997		7.3505	4.63609	60.3018
27320	14.4	0.468	2.997		7.42266	4.666	60.3018
27420	14.14	0.469	3		7.28864	4.67597	60.3622
27520	14.14	0.469	3		7.28864	4.67597	60.3622
27621	14.4	0.468	2.997		7.42266	4.666	60.3018
27722	14.7	0.473	2.997		7.5773	4.71585	60.3018
27822	13.44	0.472	2.998		6.92782	4.70588	60.3219
27922	13.14	0.472	2.995		6.77318	4.70588	60.2616
28022	14.68	0.474	3.001		7.56699	4.72582	60.3823
28123	14.54	0.476	2.998		7.49483	4.74576	60.3219
28224	14.54	0.476	2.998		7.49483	4.74576	60.3219
28324	14.42	0.475	2.995		7.43297	4.73579	60.2616
28424	14.9	0.479	2.999		7.6804	4.77567	60.3421
28524	14.68	0.479	2.999		7.56699	4.77567	60.3421
28625	14.68	0.479	2.999		7.56699	4.77567	60.3421
28726	15	0.48	2.995		7.73194	4.78564	60.2616
28827	15.04	0.483	2.998		7.75256	4.81555	60.3219
28928	15.04	0.483	2.998		7.75256	4.81555	60.3219
29028	15.04	0.483	2.998		7.75256	4.81555	60.3219
29128	15.1	0.486	2.998		7.78349	4.84546	60.3219
29228	15.04	0.487	2.999		7.75256	4.85543	60.3421
29329	15.04	0.487	2.999		7.75256	4.85543	60.3421
29430	14.72	0.486	2.998		7.58761	4.84546	60.3219
29530	14.72	0.486	2.998		7.58761	4.84546	60.3219
29630	14.78	0.492	2.998		7.61854	4.90528	60.3219
29730	14.78	0.492	2.998		7.61854	4.90528	60.3219
29831	15.1	0.491	3		7.78349	4.89531	60.3622
29932	15.5	0.495	2.999		7.98967	4.93519	60.3421
30032	14.7	0.495	2.994		7.5773	4.93519	60.2414
30132	14.84	0.494	2.995		7.64947	4.92522	60.2616
30232	15.7	0.495	2.996		8.09277	4.93519	60.2817
30333	15.74	0.497	2.996		8.11338	4.95513	60.2817
30434	15.06	0.499	3		7.76287	4.97507	60.3622
30535	15.06	0.499	3		7.76287	4.97507	60.3622
30636	15.26	0.498	2.997		7.86596	4.9651	60.3018
30736	15.26	0.498	2.997		7.86596	4.9651	60.3018
30836	14.58	0.503	2.998		7.51545	5.01496	60.3219
30936	14.42	0.502	2.996		7.43297	5.00499	60.2817
31037	15.9	0.503	2.998		8.19586	5.01496	60.3219
31138	16.04	0.507	2.997		8.26802	5.05484	60.3018
31238	16.04	0.507	2.997		8.26802	5.05484	60.3018
31338	16.04	0.507	2.997		8.26802	5.05484	60.3018
31438	16.16	0.509	2.996		8.32988	5.07478	60.2817
31539	16.1	0.51	2.999		8.29895	5.08475	60.3421
31640	15.8	0.509	2.997		8.14431	5.07478	60.3018
31740	16.04	0.511	2.998		8.26802	5.09472	60.3219
31840	16.34	0.512	2.994		8.42266	5.10469	60.2414
31940	16.42	0.513	2.996		8.4639	5.11466	60.2817
32041	16.24	0.515	2.997		8.37112	5.1346	60.3018
32142	16.24	0.515	2.997		8.37112	5.1346	60.3018
32243	16.5	0.514	2.996		8.50514	5.12463	60.2817
32344	16.62	0.518	2.998		8.56699	5.16451	60.3219
32444	15.8	0.519	2.996		8.14431	5.17448	60.2817
32544	15.48	0.519	2.998		7.97936	5.17448	60.3219
32644	16.8	0.519	2.998		8.65978	5.17448	60.3219
32745	16.8	0.522	2.998		8.65978	5.20439	60.3219
32846	15.82	0.523	2.994		8.15462	5.21436	60.2414
32946	16.02	0.522	2.998		8.25771	5.20439	60.3219
33046	17.02	0.523	2.999		8.77318	5.21436	60.3421
33146	16.62	0.528	2.998		8.56699	5.26421	60.3219
33247	16.62	0.528	2.998		8.56699	5.26421	60.3219
33348	16.62	0.528	2.998		8.56699	5.26421	60.3219
33448	17.06	0.529	2.996		8.7938	5.27418	60.2817
33548	16.42	0.53	2.995		8.4639	5.28415	60.2616
33648	16.42	0.53	2.995		8.4639	5.28415	60.2616
33749	17.3	0.531	2.997		8.91751	5.29412	60.3018
33850	17.1	0.534	3		8.81441	5.32403	60.3622
33951	17.1	0.534	3		8.81441	5.32403	60.3622
34052	17.34	0.534	2.998		8.93813	5.32403	60.3219
34152	17.36	0.536	2.995		8.94843	5.34397	60.2616
34252	17.36	0.536	2.995		8.94843	5.34397	60.2616
34352	17.42	0.537	3.001		8.97936	5.35394	60.3823
34453	17.58	0.539	2.998		9.06184	5.37388	60.3219
34554	17.22	0.54	2.995		8.87627	5.38385	60.2616
34654	16.92	0.539	2.994		8.72163	5.37388	60.2414
34754	17.66	0.542	2.994		9.10307	5.40379	60.2414
34854	17.66	0.542	2.996		9.10307	5.40379	60.2817
34955	17.58	0.544	2.996		9.06184	5.42373	60.2817
35056	17.82	0.544	2.996		9.18555	5.42373	60.2817
35156	17.98	0.546	2.997		9.26802	5.44367	60.3018
35256	17.96	0.547	2.995		9.25771	5.45364	60.2616
35356	17	0.547	2.996		8.76287	5.45364	60.2817
35457	16.96	0.546	2.998		8.74225	5.44367	60.3219
35558	18.16	0.55	2.999		9.3608	5.48355	60.3421
35659	18.14	0.552	2.996		9.3505	5.50349	60.2817
35760	18.14	0.552	2.996		9.3505	5.50349	60.2817
35860	17.74	0.551	2.994		9.14431	5.49352	60.2414
35960	18.36	0.554	2.996		9.4639	5.52343	60.2817
36060	18.08	0.555	2.997		9.31957	5.5334	60.3018
36161	17.7	0.555	2.999		9.12369	5.5334	60.3421
36262	18.5	0.556	3		9.53606	5.54337	60.3622
36362	18.16	0.558	2.994		9.3608	5.56331	60.2414
36462	18.16	0.558	2.994		9.3608	5.56331	60.2414
36562	18.64	0.56	3		9.60823	5.58325	60.3622
36663	18.46	0.562	2.997		9.51544	5.60319	60.3018
36764	18.46	0.562	2.997		9.51544	5.60319	60.3018
36864	18.2	0.561	2.998		9.38142	5.59322	60.3219
36964	18.2	0.561	2.998		9.38142	5.59322	60.3219
37064	18.02	0.565	2.996		9.28864	5.6331	60.2817
37165	18.02	0.565	2.996		9.28864	5.6331	60.2817
37266	19	0.567	2.996		9.79379	5.65304	60.2817
37367	18.92	0.568	2.999		9.75256	5.66301	60.3421
37468	18.5	0.568	2.999		9.53606	5.66301	60.3421
37568	18.96	0.568	2.998		9.77317	5.66301	60.3219
37668	19.22	0.571	2.999		9.9072	5.69292	60.3421
37768	19.02	0.573	2.997		9.8041	5.71286	60.3018
37869	19.02	0.573	2.997		9.8041	5.71286	60.3018
37970	19.24	0.572	2.996		9.9175	5.70289	60.2817
38070	19.54	0.576	2.999		10.0721	5.74277	60.3421
38170	18.58	0.577	3		9.5773	5.75274	60.3622
38270	18.58	0.577	3		9.5773	5.75274	60.3622
38371	19.44	0.576	2.995		10.0206	5.74277	60.2616
38472	19.6	0.58	2.996		10.1031	5.78265	60.2817
38572	19.34	0.58	2.996		9.96905	5.78265	60.2817
38672	19.34	0.58	2.996		9.96905	5.78265	60.2817
38772	19.6	0.581	2.999		10.1031	5.79262	60.3421
38873	19.94	0.584	2.999		10.2783	5.82253	60.3421
38974	19.1	0.584	2.994		9.84534	5.82253	60.2414
39074	19.1	0.584	2.994		9.84534	5.82253	60.2414
39174	20	0.584	2.994		10.3093	5.82253	60.2414
39274	20.02	0.588	2.994		10.3196	5.86241	60.2414
39375	19.18	0.587	2.997		9.88658	5.85244	60.3018
39476	19.68	0.587	2.999		10.1443	5.85244	60.3421
39577	19.68	0.587	2.999		10.1443	5.85244	60.3421
39678	19.6	0.592	2.998		10.1031	5.90229	60.3219
39778	19.6	0.592	2.998		10.1031	5.90229	60.3219
39878	20.34	0.592	2.997		10.4845	5.90229	60.3018
39978	20.26	0.596	3		10.4433	5.94217	60.3622
40079	19.58	0.595	2.998		10.0928	5.9322	60.3219
40180	19.44	0.594	2.995		10.0206	5.92223	60.2616
40280	20.48	0.597	2.997		10.5567	5.95214	60.3018
40380	20.58	0.599	3		10.6082	5.97208	60.3622
40480	19.58	0.599	2.997		10.0928	5.97208	60.3018
40581	19.1	0.597	2.997		9.84534	5.95214	60.3018
40682	20.8	0.6	3.001		10.7216	5.98205	60.3823
40782	21	0.604	2.999		10.8247	6.02193	60.3421
40882	19.82	0.603	2.994		10.2165	6.01196	60.2414
40982	19.82	0.603	2.994		10.2165	6.01196	60.2414
41083	21.04	0.604	2.998		10.8453	6.02193	60.3219
41184	21.02	0.607	3		10.835	6.05184	60.3622
41285	21.02	0.607	3		10.835	6.05184	60.3622
41386	20.56	0.606	2.997		10.5979	6.04187	60.3018
41486	21.12	0.609	3		10.8866	6.07178	60.3622
41586	20.84	0.611	2.996		10.7422	6.09172	60.2817
41686	20.84	0.611	2.996		10.7422	6.09172	60.2817
41787	21	0.611	2.999		10.8247	6.09172	60.3421
41888	21.1	0.612	2.998		10.8763	6.10169	60.3219
41988	21.02	0.614	2.998		10.835	6.12164	60.3219
42088	21.36	0.614	3		11.0103	6.12164	60.3622
42188	21.56	0.615	2.999		11.1134	6.13161	60.3421
42289	21.64	0.618	2.999		11.1546	6.16152	60.3421
42390	21.64	0.618	2.999		11.1546	6.16152	60.3421
42490	21.64	0.618	2.999		11.1546	6.16152	60.3421
42590	21.96	0.62	2.996		11.3196	6.18146	60.2817
42690	21.06	0.622	2.998		10.8556	6.2014	60.3219
42791	21.06	0.622	2.998		10.8556	6.2014	60.3219
42892	21.82	0.623	2.995		11.2474	6.21137	60.2616
42993	22	0.625	2.998		11.3402	6.23131	60.3219
43094	21.14	0.625	2.996		10.8969	6.23131	60.2817
43194	21.1	0.625	2.996		10.8763	6.23131	60.2817
43294	22.2	0.626	2.997		11.4433	6.24128	60.3018
43394	22.22	0.628	2.995		11.4536	6.26122	60.2616
43495	21.24	0.629	2.994		10.9484	6.27119	60.2414
43596	21.22	0.628	2.997		10.9381	6.26122	60.3018
43696	22.38	0.631	2.995		11.5361	6.29113	60.2616
43796	22.4	0.632	3		11.5464	6.3011	60.3622
43896	22	0.633	3.001		11.3402	6.31107	60.3823
43997	21.74	0.633	2.996		11.2062	6.31107	60.2817
44098	22.54	0.634	2.998		11.6185	6.32104	60.3219
44198	22.66	0.637	2.998		11.6804	6.35095	60.3219
44298	22	0.637	2.995		11.3402	6.35095	60.2616
44398	22	0.637	2.995		11.3402	6.35095	60.2616
44499	22.68	0.638	2.994		11.6907	6.36092	60.2414
44600	22.88	0.64	2.999		11.7938	6.38086	60.3421
44701	22.68	0.642	2.996		11.6907	6.4008	60.2817
44802	22.66	0.641	2.998		11.6804	6.39083	60.3219
44902	22.98	0.643	2.999		11.8453	6.41077	60.3421
45002	23.18	0.644	2.998		11.9484	6.42074	60.3219
45102	23.14	0.645	2.996		11.9278	6.43071	60.2817
45203	22.7	0.645	2.997		11.701	6.43071	60.3018
45304	22.7	0.646	2.997		11.701	6.44068	60.3018
45404	23.34	0.648	2.992		12.0309	6.46062	60.2012
45504	23.36	0.649	2.997		12.0412	6.47059	60.3018
45604	23.28	0.65	2.995		12	6.48056	60.2616
45705	23.16	0.651	2.997		11.9381	6.49053	60.3018
45806	23.18	0.651	2.999		11.9484	6.49053	60.3421
45906	23.54	0.652	2.998		12.134	6.5005	60.3219
46006	23.84	0.654	2.997		12.2886	6.52044	60.3018
46106	22.96	0.656	2.997		11.835	6.54038	60.3018
46207	22.96	0.656	2.997		11.835	6.54038	60.3018
46308	23.56	0.655	2.998		12.1443	6.53041	60.3219
46409	23.96	0.66	2.996		12.3505	6.58026	60.2817
46510	22.46	0.66	2.996		11.5773	6.58026	60.2817
46610	22.4	0.658	2.996		11.5464	6.56032	60.2817
46710	22.4	0.658	2.996		11.5464	6.56032	60.2817
46810	23.38	0.663	2.997		12.0515	6.61017	60.3018
46911	23.08	0.662	2.996		11.8969	6.6002	60.2817
47012	24.08	0.663	2.994		12.4123	6.61017	60.2414
47112	24.26	0.666	2.998		12.5051	6.64008	60.3219
47212	23.62	0.667	2.999		12.1752	6.65005	60.3421
47312	23.88	0.666	2.995		12.3093	6.64008	60.2616
47413	24.34	0.668	2.995		12.5464	6.66002	60.2616
47514	24.42	0.669	2.994		12.5876	6.66999	60.2414
47614	23.96	0.671	2.994		12.3505	6.68993	60.2414
47714	23.96	0.671	2.994		12.3505	6.68993	60.2414
47814	24.54	0.671	2.994		12.6495	6.68993	60.2414
47915	24.68	0.673	2.998		12.7216	6.70987	60.3219
48016	24.74	0.675	3		12.7526	6.72981	60.3622
48117	24.74	0.675	3		12.7526	6.72981	60.3622
48218	24.38	0.675	2.996		12.567	6.72981	60.2817
48318	25.12	0.674	2.997		12.9484	6.71984	60.3018
48418	24.64	0.68	2.996		12.701	6.77966	60.2817
48518	24.64	0.68	2.996		12.701	6.77966	60.2817
48619	24.64	0.68	2.996		12.701	6.77966	60.2817
48720	25.24	0.682	2.996		13.0103	6.7996	60.2817
48820	25.08	0.683	2.995		12.9278	6.80957	60.2616
48920	24.7	0.683	2.997		12.7319	6.80957	60.3018
49020	24.86	0.683	2.994		12.8144	6.80957	60.2414
49121	25.4	0.684	2.997		13.0928	6.81954	60.3018
49222	25.16	0.687	2.997		12.969	6.84945	60.3018
49322	25.16	0.687	2.997		12.969	6.84945	60.3018
49422	25.5	0.687	2.996		13.1443	6.84945	60.2817
49522	25.62	0.689	2.994		13.2062	6.86939	60.2414
49623	25.62	0.689	2.994		13.2062	6.86939	60.2414
49724	25.42	0.69	2.995		13.1031	6.87936	60.2616
49824	25.82	0.693	2.998		13.3092	6.90927	60.3219
49924	25.72	0.694	2.998		13.2577	6.91924	60.3219
50024	25.72	0.694	2.998		13.2577	6.91924	60.3219
50125	25.9	0.694	2.999		13.3505	6.91924	60.3421
50226	26.04	0.697	2.998		13.4227	6.94915	60.3219
50327	25.26	0.696	2.999		13.0206	6.93918	60.3421
50428	25.74	0.697	2.999		13.268	6.94915	60.3421
50528	26.16	0.699	2.997		13.4845	6.96909	60.3018
50628	26.22	0.701	2.999		13.5154	6.98903	60.3421
50728	26.22	0.701	2.999		13.5154	6.98903	60.3421
50829	26.2	0.701	2.995		13.5051	6.98903	60.2616
50930	26.46	0.703	2.997		13.6391	7.00897	60.3018
51030	26.28	0.705	2.995		13.5464	7.02891	60.2616
51130	25.36	0.704	2.996		13.0721	7.01894	60.2817
51230	25.8	0.705	2.996		13.2989	7.02891	60.2817
51331	26.7	0.707	2.998		13.7629	7.04885	60.3219
51432	26.7	0.71	2.999		13.7629	7.07876	60.3421
51532	25.46	0.709	2.997		13.1237	7.06879	60.3018
51632	25.74	0.709	2.997		13.268	7.06879	60.3018
51732	27.02	0.712	2.998		13.9278	7.0987	60.3219
51833	26.9	0.714	3		13.8659	7.11864	60.3622
51934	26.9	0.714	3		13.8659	7.11864	60.3622
52035	26.58	0.713	2.997		13.701	7.10867	60.3018
52136	27.28	0.715	2.998		14.0618	7.12861	60.3219
52236	27.08	0.716	2.998		13.9587	7.13858	60.3219
52336	27.08	0.716	2.998		13.9587	7.13858	60.3219
52436	27.12	0.717	2.999		13.9794	7.14855	60.3421
52537	27.4	0.72	2.999		14.1237	7.17846	60.3421
52638	26.7	0.721	2.999		13.7629	7.18843	60.3421
52738	26.24	0.72	2.999		13.5257	7.17846	60.3421
52838	27.54	0.721	2.997		14.1958	7.18843	60.3018
52938	27.68	0.725	3		14.268	7.22832	60.3622
53039	27.68	0.725	3		14.268	7.22832	60.3622
53140	27.26	0.725	2.997		14.0515	7.22832	60.3018
53240	27.78	0.726	2.995		14.3196	7.23829	60.2616
53340	27.76	0.729	2.993		14.3092	7.2682	60.2213
53440	27.02	0.727	2.996		13.9278	7.24826	60.2817
53541	27.44	0.728	2.997		14.1443	7.25823	60.3018
53642	28.04	0.729	2.997		14.4536	7.2682	60.3018
53743	28.16	0.731	2.999		14.5154	7.28814	60.3421
53844	27.42	0.732	2.995		14.134	7.29811	60.2616
53944	27.18	0.731	2.995		14.0103	7.28814	60.2616
54044	28.2	0.734	2.996		14.5361	7.31805	60.2817
54144	28.28	0.737	2.997		14.5773	7.34796	60.3018
54245	27.74	0.737	2.998		14.2989	7.34796	60.3219
54346	27.74	0.737	2.998		14.2989	7.34796	60.3219
54446	28.32	0.737	3		14.5979	7.34796	60.3622
54546	28.6	0.74	2.998		14.7422	7.37787	60.3219
54646	27.1	0.74	2.998		13.969	7.37787	60.3219
54747	27.36	0.739	2.994		14.1031	7.3679	60.2414
54848	28.68	0.743	2.997		14.7835	7.40778	60.3018
54948	28.56	0.743	3		14.7216	7.40778	60.3622
55048	28.46	0.745	2.999		14.6701	7.42772	60.3421
55148	28.7	0.745	2.996		14.7938	7.42772	60.2817
55249	28.78	0.747	2.996		14.835	7.44766	60.2817
55350	28.92	0.748	2.999		14.9072	7.45763	60.3421
55451	28.9	0.749	2.998		14.8969	7.4676	60.3219
55552	28.9	0.749	2.998		14.8969	7.4676	60.3219
55652	28.94	0.749	2.997		14.9175	7.4676	60.3018
55752	29.3	0.751	2.999		15.1031	7.48754	60.3421
55852	29.26	0.753	2.999		15.0824	7.50748	60.3421
55953	29.26	0.753	2.999		15.0824	7.50748	60.3421
56054	29.1	0.752	2.997		15	7.49751	60.3018
56154	29.76	0.756	2.998		15.3402	7.53739	60.3219
56254	29.28	0.756	2.999		15.0928	7.53739	60.3421
56354	29.28	0.756	2.999		15.0928	7.53739	60.3421
56455	29.68	0.758	2.999		15.2989	7.55733	60.3421
56556	29.76	0.76	2.999		15.3402	7.57727	60.3421
56656	29.68	0.76	2.996		15.2989	7.57727	60.2817
56756	29.6	0.761	3		15.2577	7.58724	60.3622
56856	29.9	0.762	2.995		15.4123	7.59721	60.2616
56957	29.98	0.763	2.999		15.4536	7.60718	60.3421
57058	30.08	0.766	3		15.5051	7.63709	60.3622
57159	29.34	0.766	2.999		15.1237	7.63709	60.3421
57260	29.1	0.764	2.996		15	7.61715	60.2817
57360	30.2	0.768	2.998		15.567	7.65703	60.3219
57460	30.34	0.769	2.998		15.6391	7.667	60.3219
57560	30.08	0.769	2.999		15.5051	7.667	60.3421
57661	30.24	0.769	2.996		15.5876	7.667	60.2817
57762	30.4	0.771	2.996		15.6701	7.68694	60.2817
57862	30.6	0.773	2.998		15.7732	7.70688	60.3219
57962	30.6	0.774	2.998		15.7732	7.71685	60.3219
58062	30.28	0.774	2.996		15.6082	7.71685	60.2817
58163	30.22	0.774	2.997		15.5773	7.71685	60.3018
58264	30.64	0.775	3.001		15.7938	7.72682	60.3823
58364	30.88	0.777	2.997		15.9175	7.74676	60.3018
58464	30.84	0.778	2.997		15.8969	7.75673	60.3018
58564	30.84	0.778	2.997		15.8969	7.75673	60.3018
58665	30.64	0.779	2.997		15.7938	7.7667	60.3018
58766	31.14	0.781	2.997		16.0515	7.78664	60.3018
58867	31.04	0.784	3.001		16	7.81655	60.3823
58968	31.04	0.784	3.001		16	7.81655	60.3823
59068	30.86	0.783	2.996		15.9072	7.80658	60.2817
59168	30.86	0.783	2.996		15.9072	7.80658	60.2817
59268	30.66	0.787	2.997		15.8041	7.84646	60.3018
59369	30.66	0.787	2.997		15.8041	7.84646	60.3018
59470	31.52	0.787	2.998		16.2474	7.84646	60.3219
59570	31.64	0.791	2.997		16.3092	7.88634	60.3018
59670	30.38	0.79	2.995		15.6598	7.87637	60.2616
59770	30.78	0.79	2.996		15.8659	7.87637	60.2817
59871	31.84	0.792	2.995		16.4123	7.89631	60.2616
59972	31.74	0.794	2.997		16.3608	7.91625	60.3018
60072	31.74	0.794	2.997		16.3608	7.91625	60.3018
60172	31.6	0.794	2.998		16.2886	7.91625	60.3219
60272	32.08	0.797	2.999		16.536	7.94616	60.3421
60373	32.12	0.799	2.999		16.5567	7.9661	60.3421
60474	32.12	0.799	2.999		16.5567	7.9661	60.3421
60574	32.12	0.799	2.999		16.5567	7.9661	60.3421
60674	32.28	0.8	2.999		16.6391	7.97607	60.3421
60774	32.4	0.802	2.996		16.701	7.99601	60.2817
60875	31.4	0.802	2.998		16.1855	7.99601	60.3219
60976	31.5	0.802	2.996		16.2371	7.99601	60.2817
61077	32.54	0.804	2.997		16.7732	8.01595	60.3018
61178	32.54	0.807	2.997		16.7732	8.04586	60.3018
61278	32.54	0.807	2.997		16.7732	8.04586	60.3018
61378	32.26	0.806	2.996		16.6288	8.03589	60.2817
61478	32.8	0.808	2.996		16.9072	8.05583	60.2817
61579	32.6	0.811	2.998		16.8041	8.08574	60.3219
61680	31.54	0.809	2.996		16.2577	8.0658	60.2817
61780	31.82	0.81	2.998		16.402	8.07577	60.3219
61880	32.94	0.812	3		16.9793	8.09571	60.3622
61980	32.64	0.815	2.999		16.8247	8.12562	60.3421
62081	32.64	0.815	2.999		16.8247	8.12562	60.3421
62182	32.84	0.815	2.998		16.9278	8.12562	60.3219
62282	33.1	0.817	2.996		17.0618	8.14556	60.2817
62382	32.92	0.818	2.996		16.969	8.15553	60.2817
62482	32.88	0.819	2.998		16.9484	8.1655	60.3219
62583	33.22	0.818	2.999		17.1237	8.15553	60.3421
62684	33.42	0.82	2.998		17.2268	8.17547	60.3219
62785	33.38	0.823	2.999		17.2061	8.20538	60.3421
62886	32.62	0.822	2.997		16.8144	8.19541	60.3018
62986	32.58	0.822	2.999		16.7938	8.19541	60.3421
63086	33.62	0.824	2.999		17.3299	8.21535	60.3421
63186	33.48	0.827	2.999		17.2577	8.24526	60.3421
63287	33.48	0.827	2.999		17.2577	8.24526	60.3421
63388	33.32	0.827	2.998		17.1752	8.24526	60.3219
63488	33.86	0.829	2.996		17.4536	8.2652	60.2817
63588	33.86	0.831	2.995		17.4536	8.28514	60.2616
63688	32.94	0.83	2.995		16.9793	8.27517	60.2616
63789	32.96	0.83	2.996		16.9897	8.27517	60.2817
63890	34.06	0.832	3		17.5567	8.29511	60.3622
63990	34.1	0.835	2.994		17.5773	8.32502	60.2414
64090	34.1	0.835	2.994		17.5773	8.32502	60.2414
64190	33.64	0.834	2.997		17.3402	8.31505	60.3018
64291	34.34	0.837	3		17.701	8.34497	60.3622
64392	34	0.839	2.996		17.5257	8.36491	60.2817
64493	34	0.839	2.996		17.5257	8.36491	60.2817
64594	34.16	0.838	2.995		17.6082	8.35494	60.2616
64694	34.56	0.842	2.999		17.8144	8.39482	60.3421
64794	33.82	0.842	2.999		17.433	8.39482	60.3421
64894	33.82	0.842	2.999		17.433	8.39482	60.3421
64995	34.68	0.843	3.002		17.8763	8.40479	60.4024
65096	34.78	0.845	2.998		17.9278	8.42473	60.3219
65196	34.28	0.846	2.998		17.6701	8.4347	60.3219
65296	34.28	0.846	2.998		17.6701	8.4347	60.3219
65396	34.88	0.848	2.997		17.9793	8.45464	60.3018
65497	35.06	0.849	2.998		18.0721	8.46461	60.3219
65598	33.68	0.849	2.995		17.3608	8.46461	60.2616
65698	33.88	0.849	2.996		17.4639	8.46461	60.2817
65798	33.88	0.849	2.996		17.4639	8.46461	60.2817
65898	33.88	0.849	2.996		17.4639	8.46461	60.2817
65999	33.4	0.852	2.997		17.2165	8.49452	60.3018
66100	35.24	0.854	2.996		18.1649	8.51446	60.2817
66201	35.46	0.855	3		18.2783	8.52443	60.3622
66302	35.44	0.856	3		18.268	8.5344	60.3622
66402	35.36	0.858	2.995		18.2268	8.55434	60.2616
66502	35.8	0.86	2.996		18.4536	8.57428	60.2817
66602	35.44	0.859	2.995		18.268	8.56431	60.2616
66703	35.54	0.86	2.997		18.3195	8.57428	60.3018
66804	35.98	0.862	2.995		18.5464	8.59422	60.2616
66904	34.84	0.864	2.998		17.9587	8.61416	60.3219
67004	34.84	0.864	2.998		17.9587	8.61416	60.3219
67104	35.64	0.863	2.999		18.3711	8.60419	60.3421
67205	35.64	0.863	2.999		18.3711	8.60419	60.3421
67306	35.02	0.867	2.996		18.0515	8.64407	60.2817
67406	34.56	0.866	2.995		17.8144	8.6341	60.2616
67506	36.12	0.868	2.999		18.6185	8.65404	60.3421
67606	36.32	0.868	3		18.7216	8.65404	60.3622
67707	35.36	0.872	2.998		18.2268	8.69392	60.3219
67808	35.36	0.872	2.998		18.2268	8.69392	60.3219
67909	35.96	0.872	2.996		18.536	8.69392	60.2817
68010	35.96	0.872	2.996		18.536	8.69392	60.2817
68110	35.7	0.875	2.998		18.402	8.72383	60.3219
68210	35.7	0.875	2.998		18.402	8.72383	60.3219
68310	36.7	0.876	2.998		18.9175	8.7338	60.3219
68411	36.86	0.879	2.997		19	8.76371	60.3018
68512	36.26	0.88	2.997		18.6907	8.77368	60.3018
68612	36.26	0.88	2.997		18.6907	8.77368	60.3018
68712	36.86	0.88	2.999		19	8.77368	60.3421
68812	37.1	0.882	2.998		19.1237	8.79362	60.3219
68913	35.9	0.883	2.996		18.5051	8.80359	60.2817
69014	35.48	0.882	2.995		18.2886	8.79362	60.2616
69114	37.3	0.885	2.998		19.2268	8.82353	60.3219
69214	36.82	0.886	2.998		18.9793	8.8335	60.3219
69314	36.82	0.886	2.998		18.9793	8.8335	60.3219
69415	37.3	0.886	3		19.2268	8.8335	60.3622
69516	37.54	0.889	2.998		19.3505	8.86341	60.3219
69617	36.36	0.89	2.995		18.7422	8.87338	60.2616
69718	36.18	0.89	2.996		18.6494	8.87338	60.2817
69818	37.62	0.891	2.998		19.3917	8.88335	60.3219
69918	37.4	0.894	2.999		19.2783	8.91326	60.3421
70018	37.52	0.893	2.998		19.3402	8.90329	60.3219
70119	37.64	0.894	2.997		19.402	8.91326	60.3018
70220	37.72	0.894	2.998		19.4433	8.91326	60.3219
70320	38.08	0.896	2.996		19.6288	8.9332	60.2817
70420	37.94	0.898	2.999		19.5567	8.95314	60.3421
70520	37.94	0.898	2.999		19.5567	8.95314	60.3421
70621	37.94	0.898	2.999		19.5567	8.95314	60.3421
70722	38.42	0.899	2.999		19.8041	8.96311	60.3421
70822	36.22	0.905	2.996		18.6701	9.02293	60.2817
70922	36.22	0.905	2.996		18.6701	9.02293	60.2817
71022	36.22	0.905	2.996		18.6701	9.02293	60.2817
71123	36.22	0.905	2.996		18.6701	9.02293	60.2817
71224	36.3	0.904	2.998		18.7113	9.01296	60.3219
71324	38.34	0.907	2.995		19.7628	9.04287	60.2616
71424	38.52	0.908	3		19.8556	9.05284	60.3622
71524	38.34	0.91	3		19.7628	9.07278	60.3622
71625	37.9	0.908	2.998		19.536	9.05284	60.3219
71726	38.76	0.91	2.994		19.9793	9.07278	60.2414
71827	39.06	0.912	2.997		20.134	9.09272	60.3018
71928	36.92	0.913	2.998		19.0309	9.10269	60.3219
72028	36.48	0.912	2.997		18.8041	9.09272	60.3018
72128	38.66	0.913	2.995		19.9278	9.10269	60.2616
72228	38.66	0.913	2.995		19.9278	9.10269	60.2616
72329	37.52	0.916	2.994		19.3402	9.1326	60.2414
72430	37.82	0.916	2.998		19.4948	9.1326	60.3219
72530	39.18	0.919	2.996		20.1958	9.16251	60.2817
72630	38.94	0.92	3		20.0721	9.17248	60.3622
72730	39.02	0.92	2.996		20.1134	9.17248	60.2817
72831	39.34	0.921	2.996		20.2783	9.18245	60.2817
72932	39.38	0.923	2.999		20.2989	9.20239	60.3421
73032	39.42	0.923	2.996		20.3195	9.20239	60.2817
73132	39.5	0.924	2.998		20.3608	9.21236	60.3219
73232	39.68	0.925	2.998		20.4536	9.22233	60.3219
73333	39.68	0.927	2.999		20.4536	9.24227	60.3421
73434	39.68	0.928	2.998		20.4536	9.25224	60.3219
73535	39.8	0.928	2.997		20.5154	9.25224	60.3018
73636	39.9	0.929	2.997		20.567	9.26221	60.3018
73736	39.92	0.931	2.997		20.5773	9.28215	60.3018
73836	40	0.932	2.997		20.6185	9.29212	60.3018
73936	39.9	0.934	2.994		20.567	9.31206	60.2414
74037	39.94	0.935	2.998		20.5876	9.32203	60.3219
74138	40.1	0.934	2.998		20.6701	9.31206	60.3219
74238	40.14	0.935	2.997		20.6907	9.32203	60.3018
74338	40.34	0.936	2.999		20.7938	9.332	60.3421
74438	40.5	0.938	2.996		20.8762	9.35194	60.2817
74539	40.44	0.94	2.997		20.8453	9.37188	60.3018
74640	40.2	0.94	2.997		20.7216	9.37188	60.3018
74740	40.1	0.939	2.997		20.6701	9.36191	60.3018
74840	40.68	0.942	2.994		20.969	9.39182	60.2414
74940	40.84	0.943	2.995		21.0515	9.40179	60.2616
75041	40.08	0.945	2.996		20.6597	9.42173	60.2817
75142	39.86	0.944	2.995		20.5463	9.41176	60.2616
75243	40.82	0.945	2.996		21.0412	9.42173	60.2817
75344	41.14	0.948	2.997		21.2061	9.45165	60.3018
75444	39.6	0.949	2.999		20.4123	9.46162	60.3421
75544	40.1	0.947	3		20.6701	9.44167	60.3622
75644	41.14	0.95	2.999		21.2061	9.47159	60.3421
75745	40.8	0.951	2.997		21.0309	9.48156	60.3018
75846	40.58	0.951	2.996		20.9175	9.48156	60.2817
75946	41.32	0.952	2.998		21.2989	9.49153	60.3219
76046	41.36	0.954	2.997		21.3195	9.51147	60.3018
76146	41.4	0.957	2.997		21.3402	9.54138	60.3018
76247	41.3	0.955	2.998		21.2886	9.52144	60.3219
76348	41.48	0.956	2.998		21.3814	9.53141	60.3219
76448	41.62	0.96	2.993		21.4536	9.57129	60.2213
76548	41.62	0.96	2.993		21.4536	9.57129	60.2213
76648	41.64	0.96	2.993		21.4639	9.57129	60.2213
76749	41.66	0.961	2.996		21.4742	9.58126	60.2817
76850	41.72	0.962	2.999		21.5051	9.59123	60.3421
76951	41.78	0.963	2.996		21.536	9.6012	60.2817
77052	41.8	0.963	2.999		21.5463	9.6012	60.3421
77152	41.94	0.965	2.996		21.6185	9.62114	60.2817
77252	41.98	0.966	2.994		21.6391	9.63111	60.2414
77352	42.08	0.966	2.995		21.6907	9.63111	60.2616
77453	42.06	0.968	2.998		21.6804	9.65105	60.3219
77554	42.06	0.969	2.997		21.6804	9.66102	60.3018
77654	42.16	0.97	2.996		21.7319	9.67099	60.2817
77754	42.4	0.971	2.996		21.8556	9.68096	60.2817
77854	42.46	0.972	2.996		21.8866	9.69093	60.2817
77955	42.58	0.974	2.997		21.9484	9.71087	60.3018
78056	42.58	0.974	2.997		21.9484	9.71087	60.3018
78156	42.58	0.974	2.997		21.9484	9.71087	60.3018
78256	42.7	0.975	2.998		22.0103	9.72084	60.3219
78356	42.6	0.978	3.002		21.9587	9.75075	60.4024
78457	41.26	0.978	2.999		21.268	9.75075	60.3421
78558	41.76	0.977	2.997		21.5257	9.74078	60.3018
78659	43.04	0.979	3		22.1855	9.76072	60.3622
78760	42.56	0.981	2.998		21.9381	9.78066	60.3219
78860	42.56	0.981	2.998		21.9381	9.78066	60.3219
78960	43.08	0.983	2.998		22.2061	9.8006	60.3219
79060	43.3	0.985	2.999		22.3195	9.82054	60.3421
79161	43.3	0.985	2.999		22.3195	9.82054	60.3421
79262	43.3	0.985	2.999		22.3195	9.82054	60.3421
79362	43.44	0.987	2.997		22.3917	9.84048	60.3018
79462	43.02	0.989	2.998		22.1752	9.86042	60.3219
79562	43.36	0.989	2.994		22.3505	9.86042	60.2414
79663	43.48	0.99	3		22.4123	9.87039	60.3622
79764	43.52	0.991	3.002		22.4329	9.88036	60.4024
79864	43.68	0.993	2.998		22.5154	9.9003	60.3219
79964	43.56	0.993	2.996		22.4536	9.9003	60.2817
80064	43.58	0.993	2.998		22.4639	9.9003	60.3219
80165	43.72	0.995	2.998		22.536	9.92024	60.3219
80266	43.8	0.996	2.996		22.5773	9.93021	60.2817
80367	43.82	0.999	2.997		22.5876	9.96012	60.3018
80468	43.82	0.999	2.997		22.5876	9.96012	60.3018
80568	44	0.998	2.998		22.6804	9.95015	60.3219
80668	44.2	1.001	2.999		22.7835	9.98006	60.3421
80768	43.12	1.001	2.999		22.2268	9.98006	60.3421
80869	43.34	1	2.996		22.3402	9.97009	60.2817
80970	44.32	1.003	2.997		22.8453	10	60.3018
81070	44.34	1.004	2.998		22.8556	10.01	60.3219
81170	44.34	1.004	2.998		22.8556	10.01	60.3219
81270	44.02	1.005	2.994		22.6907	10.0199	60.2414
81371	44.58	1.007	2.998		22.9793	10.0399	60.3219
81472	44.54	1.009	2.998		22.9587	10.0598	60.3219
81572	43.88	1.009	2.997		22.6185	10.0598	60.3018
81672	43.94	1.009	2.998		22.6494	10.0598	60.3219
81772	44.74	1.01	2.997		23.0618	10.0698	60.3018
81873	44.92	1.013	2.999		23.1546	10.0997	60.3421
81974	44.22	1.013	2.996		22.7938	10.0997	60.2817
82074	44.54	1.013	2.992		22.9587	10.0997	60.2012
82174	44.92	1.014	2.996		23.1546	10.1097	60.2817
82274	44.98	1.016	2.997		23.1855	10.1296	60.3018
82375	44.96	1.017	2.998		23.1752	10.1396	60.3219
82476	45.06	1.017	2.998		23.2268	10.1396	60.3219
82577	45.1	1.019	2.998		23.2474	10.1595	60.3219
82678	45.26	1.019	2.997		23.3298	10.1595	60.3018
82778	45.32	1.02	2.997		23.3608	10.1695	60.3018
82878	45.38	1.023	2.999		23.3917	10.1994	60.3421
82978	45.36	1.024	2.999		23.3814	10.2094	60.3421
83079	45.3	1.024	3.001		23.3505	10.2094	60.3823
83180	45.32	1.025	2.996		23.3608	10.2193	60.2817
83280	45.46	1.025	2.995		23.4329	10.2193	60.2616
83380	45.54	1.026	2.996		23.4742	10.2293	60.2817
83480	45.72	1.028	2.998		23.567	10.2493	60.3219
83581	45.8	1.029	2.996		23.6082	10.2592	60.2817
83682	45.84	1.03	2.999		23.6288	10.2692	60.3421
83782	45.66	1.033	2.996		23.536	10.2991	60.2817
83882	45.66	1.033	2.996		23.536	10.2991	60.2817
83982	45.9	1.033	2.997		23.6597	10.2991	60.3018
84083	46.24	1.036	2.999		23.835	10.329	60.3421
84184	44.98	1.036	2.996		23.1855	10.329	60.2817
84285	44.7	1.034	2.998		23.0412	10.3091	60.3219
84386	46.32	1.037	3.002		23.8762	10.339	60.4024
84486	46.68	1.037	2.999		24.0618	10.339	60.3421
84586	44.8	1.041	2.995		23.0927	10.3789	60.2616
84686	44.52	1.039	2.997		22.9484	10.3589	60.3018
84787	46.6	1.041	2.999		24.0206	10.3789	60.3421
84888	46.44	1.043	2.999		23.9381	10.3988	60.3421
84988	46.62	1.044	2.999		24.0309	10.4088	60.3421
85088	46.64	1.044	2.998		24.0412	10.4088	60.3219
85188	46.74	1.046	2.997		24.0927	10.4287	60.3018
85289	46.88	1.046	2.998		24.1649	10.4287	60.3219
85390	46.86	1.048	2.997		24.1546	10.4487	60.3018
85490	46.9	1.048	2.998		24.1752	10.4487	60.3219
85590	46.9	1.049	2.996		24.1752	10.4586	60.2817
85690	47.02	1.049	2.995		24.2371	10.4586	60.2616
85791	47.06	1.051	2.995		24.2577	10.4786	60.2616
85892	47.22	1.053	2.997		24.3402	10.4985	60.3018
85993	47.28	1.054	2.997		24.3711	10.5085	60.3018
86094	47.24	1.055	2.996		24.3505	10.5184	60.2817
86194	47	1.055	2.998		24.2268	10.5184	60.3219
86294	47.36	1.054	2.997		24.4123	10.5085	60.3018
86394	47.64	1.056	2.998		24.5566	10.5284	60.3219
86495	47.78	1.059	2.999		24.6288	10.5583	60.3421
86596	47.02	1.06	2.997		24.2371	10.5683	60.3018
86696	47.02	1.06	2.997		24.2371	10.5683	60.3018
86796	47.58	1.06	2.996		24.5257	10.5683	60.2817
86896	47.74	1.063	2.997		24.6082	10.5982	60.3018
86997	47.56	1.063	2.998		24.5154	10.5982	60.3219
87098	47.7	1.063	2.994		24.5876	10.5982	60.2414
87198	47.78	1.065	2.998		24.6288	10.6181	60.3219
87298	48	1.067	2.999		24.7422	10.6381	60.3421
87398	48.04	1.068	2.997		24.7628	10.6481	60.3018
87499	47.7	1.068	2.999		24.5876	10.6481	60.3421
87600	48.04	1.069	2.997		24.7628	10.658	60.3018
87701	48.42	1.072	2.996		24.9587	10.6879	60.2817
87802	48.42	1.072	2.996		24.9587	10.6879	60.2817
87902	48.42	1.072	2.996		24.9587	10.6879	60.2817
88002	48.44	1.073	3.002		24.969	10.6979	60.4024
88102	48.52	1.076	2.997		25.0103	10.7278	60.3018
88203	47.94	1.076	2.996		24.7113	10.7278	60.2817
88304	47.94	1.076	2.996		24.7113	10.7278	60.2817
88404	48.56	1.077	2.997		25.0309	10.7378	60.3018
88504	48.52	1.079	2.996		25.0103	10.7577	60.2817
88604	48.52	1.079	2.996		25.0103	10.7577	60.2817
88705	48.64	1.079	2.998		25.0721	10.7577	60.3219
88806	48.92	1.082	2.998		25.2164	10.7876	60.3219
88906	48.72	1.083	2.999		25.1133	10.7976	60.3421
89006	48.72	1.083	2.999		25.1133	10.7976	60.3421
89106	48.86	1.083	2.996		25.1855	10.7976	60.2817
89207	49.12	1.085	2.995		25.3195	10.8175	60.2616
89308	48.98	1.088	2.995		25.2474	10.8475	60.2616
89409	48.98	1.088	2.995		25.2474	10.8475	60.2616
89510	49.02	1.087	3.001		25.268	10.8375	60.3823
89610	49.4	1.09	2.999		25.4639	10.8674	60.3421
89710	49.32	1.092	2.999		25.4226	10.8873	60.3421
89810	49.32	1.092	2.999		25.4226	10.8873	60.3421
89911	49.12	1.091	2.996		25.3195	10.8774	60.2817
90012	49.58	1.094	2.999		25.5566	10.9073	60.3421
90112	49.64	1.096	2.998		25.5876	10.9272	60.3219
90212	49.26	1.096	2.997		25.3917	10.9272	60.3018
90312	49.26	1.096	2.997		25.3917	10.9272	60.3018
90413	49.7	1.097	2.999		25.6185	10.9372	60.3421
90514	49.84	1.099	2.997		25.6907	10.9571	60.3018
90614	49.84	1.099	2.997		25.6907	10.9571	60.3018
90714	49.72	1.1	2.997		25.6288	10.9671	60.3018
90814	50.02	1.101	2.997		25.7835	10.9771	60.3018
90915	50.12	1.104	2.999		25.835	11.007	60.3421
91016	49.9	1.103	2.997		25.7216	10.997	60.3018
91117	49.9	1.103	2.997		25.7216	10.997	60.3018
91218	50.18	1.104	2.996		25.8659	11.007	60.2817
91318	50.28	1.107	2.997		25.9175	11.0369	60.3018
91418	50.08	1.108	2.997		25.8144	11.0469	60.3018
91518	49.6	1.107	2.997		25.567	11.0369	60.3018
91619	50.26	1.109	2.993		25.9072	11.0568	60.2213
91720	50.52	1.11	2.997		26.0412	11.0668	60.3018
91820	50.48	1.112	2.999		26.0206	11.0867	60.3421
91920	48.96	1.112	2.997		25.2371	11.0867	60.3018
92020	49.04	1.112	2.996		25.2783	11.0867	60.2817
92121	50.82	1.114	2.996		26.1958	11.1067	60.2817
92222	50.76	1.117	2.997		26.1649	11.1366	60.3018
92322	49.38	1.115	2.997		25.4536	11.1167	60.3018
92422	49.44	1.117	2.999		25.4845	11.1366	60.3421
92522	51	1.117	2.997		26.2886	11.1366	60.3018
92623	51.4	1.121	2.997		26.4948	11.1765	60.3018
92724	49.26	1.124	2.995		25.3917	11.2064	60.2616
92824	49.26	1.124	2.995		25.3917	11.2064	60.2616
92924	50.7	1.121	3		26.134	11.1765	60.3622
93024	50.7	1.121	3		26.134	11.1765	60.3622
93125	50.7	1.121	3		26.134	11.1765	60.3622
93226	51	1.125	2.997		26.2886	11.2164	60.3018
93327	51.26	1.127	2.996		26.4226	11.2363	60.2817
93428	51.3	1.127	2.994		26.4432	11.2363	60.2414
93528	51.36	1.128	2.996		26.4742	11.2463	60.2817
93628	51.4	1.129	3		26.4948	11.2562	60.3622
93728	51.5	1.13	2.999		26.5463	11.2662	60.3421
93829	51.54	1.132	2.997		26.567	11.2861	60.3018
93930	51.68	1.132	2.999		26.6391	11.2861	60.3421
94030	51.72	1.133	2.996		26.6597	11.2961	60.2817
94130	51.8	1.135	2.995		26.701	11.3161	60.2616
94230	51.82	1.136	2.996		26.7113	11.326	60.2817
94331	51.76	1.136	2.997		26.6804	11.326	60.3018
94432	51.82	1.137	2.997		26.7113	11.336	60.3018
94532	51.82	1.138	2.997		26.7113	11.346	60.3018
94632	51.98	1.139	2.998		26.7938	11.3559	60.3219
94732	52.06	1.14	2.999		26.835	11.3659	60.3421
94833	52.08	1.14	2.998		26.8453	11.3659	60.3219
94934	52.06	1.142	2.997		26.835	11.3858	60.3018
95035	52.08	1.144	2.996		26.8453	11.4058	60.2817
95136	52.2	1.144	2.998		26.9072	11.4058	60.3219
95236	52.12	1.145	2.997		26.8659	11.4158	60.3018
95336	52.3	1.145	2.999		26.9587	11.4158	60.3421
95436	52.34	1.147	2.999		26.9793	11.4357	60.3421
95537	52.34	1.148	3		26.9793	11.4457	60.3622
95638	52.54	1.15	2.995		27.0824	11.4656	60.2616
95738	52.7	1.151	2.995		27.1649	11.4756	60.2616
95838	52.74	1.152	2.997		27.1855	11.4855	60.3018
95938	52.52	1.152	2.996		27.0721	11.4855	60.2817
96039	52.28	1.152	2.998		26.9484	11.4855	60.3219
96140	52.88	1.154	2.999		27.2577	11.5055	60.3421
96240	53.2	1.156	3.001		27.4226	11.5254	60.3823
96340	51.96	1.158	2.994		26.7834	11.5454	60.2414
96440	51.96	1.158	2.994		26.7834	11.5454	60.2414
96541	53	1.158	2.999		27.3195	11.5454	60.3421
96642	53.1	1.16	2.996		27.3711	11.5653	60.2817
96743	53.1	1.161	2.995		27.3711	11.5753	60.2616
96844	53.16	1.16	2.997		27.402	11.5653	60.3018
96944	53.46	1.161	2.996		27.5566	11.5753	60.2817
97044	53.66	1.163	3		27.6597	11.5952	60.3622
97144	52.48	1.168	2.996		27.0515	11.6451	60.2817
97245	52.48	1.168	2.996		27.0515	11.6451	60.2817
97346	52.74	1.163	2.994		27.1855	11.5952	60.2414
97446	52.74	1.163	2.994		27.1855	11.5952	60.2414
97546	52.02	1.169	2.999		26.8144	11.655	60.3421
97646	52.14	1.169	2.998		26.8762	11.655	60.3219
97747	53.7	1.17	2.998		27.6804	11.665	60.3219
97848	53.5	1.172	2.998		27.5773	11.6849	60.3219
97948	53.68	1.172	2.999		27.67	11.6849	60.3421
98048	53.8	1.174	2.998		27.7319	11.7049	60.3219
98148	53.92	1.175	2.996		27.7938	11.7149	60.2817
98249	53.86	1.176	2.999		27.7628	11.7248	60.3421
98350	53.86	1.176	2.998		27.7628	11.7248	60.3219
98451	54	1.178	2.998		27.835	11.7448	60.3219
98552	54.06	1.179	2.996		27.8659	11.7547	60.2817
98652	54.1	1.18	3		27.8865	11.7647	60.3622
98752	54.2	1.181	2.996		27.9381	11.7747	60.2817
98852	54.3	1.181	2.998		27.9896	11.7747	60.3219
98953	54.42	1.183	2.998		28.0515	11.7946	60.3219
99054	54.28	1.184	2.997		27.9793	11.8046	60.3018
99154	53.88	1.184	2.995		27.7731	11.8046	60.2616
99254	54.4	1.185	2.998		28.0412	11.8146	60.3219
99354	54.64	1.188	3.001		28.1649	11.8445	60.3823
99455	54.48	1.188	2.997		28.0824	11.8445	60.3018
99556	54.12	1.189	2.997		27.8968	11.8544	60.3018
99656	54.6	1.188	2.997		28.1443	11.8445	60.3018
99756	54.8	1.191	2.999		28.2474	11.8744	60.3421
99856	54.78	1.192	2.997		28.2371	11.8843	60.3018
99957	54.88	1.193	2.996		28.2886	11.8943	60.2817
100058	54.86	1.193	2.998		28.2783	11.8943	60.3219
100159	55.06	1.195	2.995		28.3814	11.9143	60.2616
100260	55.06	1.196	2.997		28.3814	11.9242	60.3018
100360	55.16	1.197	3		28.4329	11.9342	60.3622
100460	54.8	1.198	2.996		28.2474	11.9442	60.2817
100560	54.84	1.196	2.996		28.268	11.9242	60.2817
100661	55.28	1.201	2.994		28.4948	11.9741	60.2414
100762	55.34	1.202	2.996		28.5257	11.984	60.2817
100862	55.36	1.202	2.996		28.536	11.984	60.2817
100962	55.28	1.202	2.997		28.4948	11.984	60.3018
101062	55.34	1.204	2.996		28.5257	12.004	60.2817
101163	55.48	1.204	2.999		28.5979	12.004	60.3421
101264	55.56	1.204	2.995		28.6391	12.004	60.2616
101364	55.58	1.207	2.996		28.6494	12.0339	60.2817
101464	55.64	1.208	2.994		28.6804	12.0439	60.2414
101564	55.66	1.209	2.998		28.6907	12.0538	60.3219
101665	55.74	1.21	2.996		28.7319	12.0638	60.2817
101766	55.8	1.211	2.998		28.7628	12.0738	60.3219
101867	55.86	1.212	2.999		28.7938	12.0837	60.3421
101968	55.96	1.212	2.998		28.8453	12.0837	60.3219
102068	55.98	1.213	2.998		28.8556	12.0937	60.3219
102168	56.16	1.215	2.999		28.9484	12.1137	60.3421
102268	56.16	1.216	2.995		28.9484	12.1236	60.2616
102369	56.22	1.217	3		28.9793	12.1336	60.3622
102470	56.28	1.217	2.998		29.0102	12.1336	60.3219
102570	56.3	1.218	2.996		29.0206	12.1436	60.2817
102670	56.42	1.22	2.998		29.0824	12.1635	60.3219
102770	56.4	1.221	2.999		29.0721	12.1735	60.3421
102871	56.56	1.222	2.994		29.1546	12.1834	60.2414
102972	56.6	1.223	2.996		29.1752	12.1934	60.2817
103072	56.62	1.224	2.997		29.1855	12.2034	60.3018
103172	56.66	1.225	2.998		29.2061	12.2134	60.3219
103272	56.66	1.226	3.001		29.2061	12.2233	60.3823
103373	56.66	1.227	2.998		29.2061	12.2333	60.3219
103474	56.6	1.228	2.996		29.1752	12.2433	60.2817
103574	56.64	1.228	2.996		29.1958	12.2433	60.2817
103674	56.76	1.229	2.997		29.2577	12.2532	60.3018
103774	56.8	1.23	2.996		29.2783	12.2632	60.2817
103875	56.92	1.232	2.996		29.3401	12.2832	60.2817
103976	57.06	1.233	3		29.4123	12.2931	60.3622
104077	57.08	1.234	2.997		29.4226	12.3031	60.3018
104178	57.02	1.235	2.996		29.3917	12.3131	60.2817
104278	56.32	1.235	2.998		29.0309	12.3131	60.3219
104378	56.38	1.235	2.997		29.0618	12.3131	60.3018
104478	57.26	1.237	2.996		29.5154	12.333	60.2817
104579	57.36	1.24	2.999		29.5669	12.3629	60.3421
104680	56.34	1.241	2.996		29.0412	12.3729	60.2817
104780	56.34	1.241	2.996		29.0412	12.3729	60.2817
104880	57.36	1.241	2.999		29.5669	12.3729	60.3421
104980	57.56	1.244	3		29.67	12.4028	60.3622
105081	56.84	1.245	2.998		29.2989	12.4128	60.3219
105182	56.54	1.245	2.996		29.1443	12.4128	60.2817
105282	57.62	1.246	2.998		29.701	12.4227	60.3219
105382	57.82	1.248	2.996		29.8041	12.4427	60.2817
105482	57.42	1.249	2.998		29.5979	12.4526	60.3219
105583	57.2	1.248	2.997		29.4845	12.4427	60.3018
105684	57.62	1.249	2.997		29.701	12.4526	60.3018
105785	57.84	1.251	2.998		29.8144	12.4726	60.3219
105886	57.98	1.253	2.997		29.8865	12.4925	60.3018
105986	57.98	1.253	2.997		29.8865	12.4925	60.3018
106086	57.98	1.253	2.997		29.8865	12.4925	60.3018
106186	58	1.255	2.998		29.8968	12.5125	60.3219
106287	57.96	1.257	2.999		29.8762	12.5324	60.3421
106388	57.04	1.257	2.999		29.402	12.5324	60.3421
106488	57.26	1.256	2.995		29.5154	12.5224	60.2616
106588	58.2	1.257	2.998		29.9999	12.5324	60.3219
106688	58.26	1.261	2.997		30.0309	12.5723	60.3018
106789	58.08	1.261	2.996		29.9381	12.5723	60.2817
106890	57.94	1.262	2.997		29.8659	12.5823	60.3018
106990	58.34	1.263	2.998		30.0721	12.5922	60.3219
107090	58.72	1.261	2.997		30.268	12.5723	60.3018
107190	58.16	1.271	2.998		29.9793	12.672	60.3219
107291	58.16	1.271	2.998		29.9793	12.672	60.3219
107392	58.16	1.271	2.998		29.9793	12.672	60.3219
107493	58.62	1.269	2.999		30.2164	12.652	60.3421
107594	58.62	1.269	2.999		30.2164	12.652	60.3421
107694	58.58	1.269	2.999		30.1958	12.652	60.3421
107794	58.8	1.271	2.997		30.3092	12.672	60.3018
107894	58.3	1.273	2.998		30.0515	12.6919	60.3219
107995	58.3	1.273	2.998		30.0515	12.6919	60.3219
108096	58.86	1.273	2.997		30.3401	12.6919	60.3018
108196	58.9	1.276	2.999		30.3608	12.7218	60.3421
108296	58.52	1.276	2.999		30.1649	12.7218	60.3421
108396	58.88	1.276	2.996		30.3505	12.7218	60.2817
108497	59.22	1.275	2.999		30.5257	12.7119	60.3421
108598	58.6	1.281	2.996		30.2061	12.7717	60.2817
108698	58.6	1.281	2.996		30.2061	12.7717	60.2817
108798	58.54	1.28	2.997		30.1752	12.7617	60.3018
108898	59.4	1.282	3		30.6185	12.7817	60.3622
108999	59.1	1.284	2.998		30.4639	12.8016	60.3219
109100	59.1	1.284	2.998		30.4639	12.8016	60.3219
109201	59.38	1.284	3		30.6082	12.8016	60.3622
109302	59.5	1.286	2.998		30.67	12.8215	60.3219
109402	59.36	1.288	2.998		30.5979	12.8415	60.3219
109502	59.18	1.287	2.995		30.5051	12.8315	60.2616
109602	59.46	1.289	2.996		30.6494	12.8514	60.2817
109703	59.58	1.29	2.999		30.7113	12.8614	60.3421
109804	59.62	1.291	3.001		30.7319	12.8714	60.3823
109904	59.7	1.292	3		30.7731	12.8814	60.3622
110004	59.74	1.293	2.998		30.7937	12.8913	60.3219
110104	59.9	1.294	2.994		30.8762	12.9013	60.2414
110205	59.74	1.295	2.996		30.7937	12.9113	60.2817
110306	59.74	1.295	2.996		30.7937	12.9113	60.2817
110406	59.84	1.295	2.998		30.8453	12.9113	60.3219
110506	60.14	1.299	2.998		30.9999	12.9511	60.3219
110606	59.9	1.299	2.996		30.8762	12.9511	60.2817
110707	59.9	1.299	2.996		30.8762	12.9511	60.2817
110808	59.8	1.3	2.997		30.8247	12.9611	60.3018
110909	60.18	1.302	2.996		31.0206	12.9811	60.2817
111010	59.96	1.305	2.999		30.9072	13.011	60.3421
111110	59.96	1.305	2.999		30.9072	13.011	60.3421
111210	60.22	1.305	2.996		31.0412	13.011	60.2817
111310	60.12	1.306	2.996		30.9896	13.0209	60.2817
111411	60.04	1.307	2.997		30.9484	13.0309	60.3018
111512	60.2	1.308	2.994		31.0309	13.0409	60.2414
111612	60.32	1.309	2.996		31.0927	13.0508	60.2817
111712	60.38	1.31	2.999		31.1236	13.0608	60.3421
111812	60.46	1.312	2.999		31.1649	13.0808	60.3421
111913	60.46	1.312	2.997		31.1649	13.0808	60.3018
112014	60.38	1.313	2.996		31.1236	13.0907	60.2817
112114	60.54	1.314	2.997		31.2061	13.1007	60.3018
112214	60.7	1.315	2.999		31.2886	13.1107	60.3421
112314	60.82	1.315	2.996		31.3504	13.1107	60.2817
112415	60.66	1.318	2.997		31.268	13.1406	60.3018
112516	60.6	1.317	2.998		31.237	13.1306	60.3219
112617	60.68	1.319	2.998		31.2783	13.1505	60.3219
112718	60.92	1.319	2.996		31.402	13.1505	60.2817
112818	60.94	1.321	2.999		31.4123	13.1705	60.3421
112918	61.08	1.321	2.998		31.4845	13.1705	60.3219
113018	61.2	1.322	2.999		31.5463	13.1805	60.3421
113119	61.2	1.327	2.997		31.5463	13.2303	60.3018
113220	61.2	1.327	2.997		31.5463	13.2303	60.3018
113320	61.2	1.327	2.997		31.5463	13.2303	60.3018
113420	61.26	1.328	3		31.5773	13.2403	60.3622
113520	60.96	1.328	2.995		31.4226	13.2403	60.2616
113621	60.82	1.329	2.996		31.3504	13.2502	60.2817
113722	61.32	1.329	2.997		31.6082	13.2502	60.3018
113822	61.32	1.331	2.999		31.6082	13.2702	60.3421
113922	61.16	1.333	2.995		31.5257	13.2901	60.2616
114022	60.82	1.333	2.996		31.3504	13.2901	60.2817
114123	61.26	1.334	2.995		31.5773	13.3001	60.2616
114224	61.34	1.336	2.998		31.6185	13.32	60.3219
114324	60.72	1.337	2.999		31.2989	13.33	60.3421
114424	60.68	1.337	2.995		31.2783	13.33	60.2616
114524	61.22	1.337	2.998		31.5566	13.33	60.3219
114625	61.6	1.338	2.998		31.7525	13.34	60.3219
114726	59.72	1.342	2.995		30.7834	13.3799	60.2616
114827	59.72	1.342	2.995		30.7834	13.3799	60.2616
114928	61.22	1.342	2.998		31.5566	13.3799	60.3219
115028	61.28	1.344	2.999		31.5876	13.3998	60.3421
115128	61.14	1.343	2.997		31.5154	13.3898	60.3018
115228	61.3	1.344	2.999		31.5979	13.3998	60.3421
115329	61.44	1.346	2.998		31.67	13.4197	60.3219
115430	61.58	1.349	2.998		31.7422	13.4497	60.3219
115530	60.44	1.348	2.996		31.1546	13.4397	60.2817
115630	59.98	1.348	2.995		30.9175	13.4397	60.2616
115730	61.68	1.35	2.995		31.7937	13.4596	60.2616
115831	61.38	1.353	2.995		31.6391	13.4895	60.2616
115932	61.38	1.353	2.995		31.6391	13.4895	60.2616
116032	61.54	1.351	2.998		31.7216	13.4696	60.3219
116132	61.54	1.351	2.998		31.7216	13.4696	60.3219
116232	60.34	1.357	2.996		31.103	13.5294	60.2817
116333	60.34	1.357	2.996		31.103	13.5294	60.2817
116434	61.48	1.357	2.996		31.6907	13.5294	60.2817
116535	61.48	1.357	2.996		31.6907	13.5294	60.2817
116636	61.48	1.357	2.996		31.6907	13.5294	60.2817
116736	61.12	1.361	2.999		31.5051	13.5693	60.3421
116836	61.76	1.362	2.998		31.835	13.5793	60.3219
116936	61.64	1.362	2.998		31.7731	13.5793	60.3219
117037	61.9	1.363	2.996		31.9071	13.5892	60.2817
117138	62.02	1.364	2.998		31.969	13.5992	60.3219
117238	62.02	1.365	2.999		31.969	13.6092	60.3421
117338	62	1.366	2.996		31.9587	13.6191	60.2817
117438	62.5	1.365	2.998		32.2164	13.6092	60.3219
117539	60.44	1.371	2.996		31.1546	13.669	60.2817
117640	60.44	1.371	2.996		31.1546	13.669	60.2817
117740	61.86	1.37	2.999		31.8865	13.659	60.3421
117840	62.14	1.371	2.995		32.0309	13.669	60.2616
117940	62.18	1.372	2.996		32.0515	13.679	60.2817
118041	62.3	1.373	2.999		32.1133	13.6889	60.3421
118142	62.36	1.374	2.997		32.1443	13.6989	60.3018
118243	62.38	1.375	2.996		32.1546	13.7089	60.2817
118344	62.3	1.376	2.997		32.1133	13.7188	60.3018
118444	62.48	1.377	2.996		32.2061	13.7288	60.2817
118544	62.48	1.378	3		32.2061	13.7388	60.3622
118644	62.54	1.379	2.997		32.237	13.7488	60.3018
118745	62.52	1.38	2.995		32.2267	13.7587	60.2616
118846	62.46	1.381	2.997		32.1958	13.7687	60.3018
118946	62.44	1.383	2.999		32.1855	13.7886	60.3421
119046	62.56	1.383	2.997		32.2474	13.7886	60.3018
119146	62.44	1.384	2.999		32.1855	13.7986	60.3421
119247	62.5	1.385	2.997		32.2164	13.8086	60.3018
119348	62.58	1.386	2.997		32.2577	13.8185	60.3018
119448	62.5	1.387	2.997		32.2164	13.8285	60.3018
119548	62.54	1.388	2.999		32.237	13.8385	60.3421
119648	62.58	1.389	2.996		32.2577	13.8485	60.2817
119749	62.7	1.39	2.999		32.3195	13.8584	60.3421
119850	62.62	1.391	3		32.2783	13.8684	60.3622
119951	62.68	1.393	2.995		32.3092	13.8883	60.2616
120052	62.68	1.393	3		32.3092	13.8883	60.3622
120152	62.68	1.394	3		32.3092	13.8983	60.3622
120252	62.64	1.394	2.998		32.2886	13.8983	60.3219
120352	62.86	1.396	2.996		32.402	13.9182	60.2817
120453	62.9	1.397	2.999		32.4226	13.9282	60.3421
120554	62.88	1.4	2.995		32.4123	13.9581	60.2616
120654	62.86	1.399	2.998		32.402	13.9482	60.3219
120754	62.88	1.399	2.996		32.4123	13.9482	60.2817
120854	62.96	1.401	2.998		32.4535	13.9681	60.3219
120955	63.02	1.402	2.997		32.4845	13.9781	60.3018
121056	63.24	1.404	2.994		32.5979	13.998	60.2414
121156	63.14	1.404	2.997		32.5463	13.998	60.3018
121256	63.18	1.405	2.998		32.5669	14.008	60.3219
121356	63.24	1.406	2.999		32.5979	14.0179	60.3421
121457	63.32	1.408	2.997		32.6391	14.0379	60.3018
121558	63.26	1.408	2.996		32.6082	14.0379	60.2817
121659	63.26	1.41	2.997		32.6082	14.0578	60.3018
121760	63.28	1.41	2.998		32.6185	14.0578	60.3219
121860	63.3	1.41	2.995		32.6288	14.0578	60.2616
121960	63.34	1.412	2.997		32.6494	14.0778	60.3018
122060	63.44	1.413	2.996		32.701	14.0877	60.2817
122161	63.52	1.414	3		32.7422	14.0977	60.3622
122262	63.54	1.415	2.998		32.7525	14.1077	60.3219
122362	63.5	1.417	2.998		32.7319	14.1276	60.3219
122462	63.62	1.417	3		32.7937	14.1276	60.3622
122562	63.58	1.419	2.993		32.7731	14.1476	60.2213
122663	63.72	1.42	3		32.8453	14.1575	60.3622
122764	63.68	1.42	2.998		32.8247	14.1575	60.3219
122864	63.76	1.422	2.999		32.8659	14.1775	60.3421
122964	63.74	1.422	2.995		32.8556	14.1775	60.2616
123064	63.86	1.423	2.996		32.9175	14.1874	60.2817
123165	63.78	1.424	2.995		32.8762	14.1974	60.2616
123266	63.82	1.426	2.999		32.8968	14.2173	60.3421
123367	63.84	1.426	2.997		32.9071	14.2173	60.3018
123468	63.82	1.427	2.997		32.8968	14.2273	60.3018
123568	63.82	1.429	2.994		32.8968	14.2473	60.2414
123668	63.96	1.429	2.995		32.969	14.2473	60.2616
123768	63.98	1.43	2.998		32.9793	14.2572	60.3219
123869	63.98	1.431	2.998		32.9793	14.2672	60.3219
123970	64.16	1.432	2.998		33.0721	14.2772	60.3219
124070	64.08	1.434	2.997		33.0309	14.2971	60.3018
124170	63.44	1.435	2.997		32.701	14.3071	60.3018
124270	63.68	1.434	2.997		32.8247	14.2971	60.3018
124371	64.4	1.437	2.997		33.1958	14.327	60.3018
124472	64.5	1.439	3		33.2474	14.347	60.3622
124572	64.5	1.439	3		33.2474	14.347	60.3622
124672	64.5	1.439	3		33.2474	14.347	60.3622
124772	64.54	1.441	2.999		33.268	14.3669	60.3421
124873	63.52	1.443	3		32.7422	14.3868	60.3622
124974	63.52	1.443	3		32.7422	14.3868	60.3622
125074	64.42	1.443	3		33.2061	14.3868	60.3622
125174	64.62	1.445	3		33.3092	14.4068	60.3622
125274	64.62	1.446	2.995		33.3092	14.4167	60.2616
125375	64.56	1.446	2.997		33.2783	14.4167	60.3018
125476	64.1	1.447	2.996		33.0412	14.4267	60.2817
125577	64.66	1.447	2.997		33.3298	14.4267	60.3018
125678	64.92	1.449	2.995		33.4638	14.4467	60.2616
125778	65.06	1.452	2.999		33.536	14.4766	60.3421
125878	63	1.452	2.994		32.4742	14.4766	60.2414
125978	63	1.451	2.996		32.4742	14.4666	60.2817
126079	64.94	1.453	2.999		33.4742	14.4865	60.3421
126180	64.98	1.455	2.998		33.4948	14.5065	60.3219
126280	64.54	1.455	2.996		33.268	14.5065	60.2817
126380	65.04	1.456	2.997		33.5257	14.5165	60.3018
126480	65.14	1.458	2.998		33.5772	14.5364	60.3219
126581	64.98	1.459	2.998		33.4948	14.5464	60.3219
126682	64.54	1.459	2.997		33.268	14.5464	60.3018
126782	65.16	1.46	2.995		33.5876	14.5563	60.2616
126882	65.34	1.462	2.999		33.6803	14.5763	60.3421
126982	64.22	1.464	2.997		33.103	14.5962	60.3018
127083	64.22	1.464	2.997		33.103	14.5962	60.3018
127184	65.32	1.464	2.996		33.67	14.5962	60.2817
127285	65.16	1.466	2.996		33.5876	14.6162	60.2817
127386	64.88	1.467	2.997		33.4432	14.6261	60.3018
127486	65.2	1.466	2.998		33.6082	14.6162	60.3219
127586	65.5	1.469	2.998		33.7628	14.6461	60.3219
127686	65.54	1.469	2.998		33.7834	14.6461	60.3219
127787	65.1	1.471	2.996		33.5566	14.666	60.2817
127888	65.1	1.471	2.996		33.5566	14.666	60.2817
127988	65.52	1.473	2.999		33.7731	14.6859	60.3421
128088	65.62	1.474	2.996		33.8247	14.6959	60.2817
128188	65.58	1.475	2.996		33.8041	14.7059	60.2817
128289	65.56	1.477	2.999		33.7937	14.7258	60.3421
128390	65.56	1.476	2.995		33.7937	14.7159	60.2616
128490	65.7	1.477	2.999		33.8659	14.7258	60.3421
128590	65.6	1.479	2.997		33.8144	14.7458	60.3018
128690	65.64	1.48	2.996		33.835	14.7557	60.2817
128791	65.72	1.481	2.994		33.8762	14.7657	60.2414
128892	65.78	1.481	2.998		33.9071	14.7657	60.3219
128993	65.74	1.483	3.001		33.8865	14.7856	60.3823
129094	65.8	1.484	3		33.9175	14.7956	60.3622
129194	65.84	1.485	2.996		33.9381	14.8056	60.2817
129294	65.8	1.485	2.999		33.9175	14.8056	60.3421
129394	65.86	1.485	2.994		33.9484	14.8056	60.2414
129495	65.9	1.487	3		33.969	14.8255	60.3622
129596	65.92	1.489	2.998		33.9793	14.8455	60.3219
129696	65.96	1.489	3		33.9999	14.8455	60.3622
129796	65.96	1.49	2.999		33.9999	14.8554	60.3421
129896	66.06	1.492	2.996		34.0515	14.8754	60.2817
129997	66.08	1.493	2.999		34.0618	14.8853	60.3421
130098	66.12	1.494	2.998		34.0824	14.8953	60.3219
130198	66.1	1.495	2.997		34.0721	14.9053	60.3018
130298	66.04	1.496	2.997		34.0412	14.9153	60.3018
130398	65.7	1.496	2.994		33.8659	14.9153	60.2414
130499	65.64	1.496	2.997		33.835	14.9153	60.3018
130600	66.14	1.498	2.999		34.0927	14.9352	60.3421
130701	66.42	1.501	3		34.237	14.9651	60.3622
130802	66.48	1.502	2.994		34.268	14.9751	60.2414
130902	64	1.503	2.997		32.9896	14.985	60.3018
131002	64.1	1.5	2.997		33.0412	14.9551	60.3018
131102	66.42	1.5	2.995		34.237	14.9551	60.2616
131203	66.76	1.509	3.001		34.4123	15.0449	60.3823
131304	63.28	1.505	2.994		32.6185	15.005	60.2414
131404	63.56	1.505	2.993		32.7628	15.005	60.2213
131504	65.44	1.504	3.001		33.7319	14.995	60.3823
131604	65.44	1.504	3.001		33.7319	14.995	60.3823
131705	65.44	1.504	3.001		33.7319	14.995	60.3823
131806	65.4	1.508	2.999		33.7113	15.0349	60.3421
131906	65.4	1.508	2.999		33.7113	15.0349	60.3421
132006	65.4	1.508	2.999		33.7113	15.0349	60.3421
132106	65.48	1.513	2.998		33.7525	15.0847	60.3219
132207	66.68	1.515	2.996		34.3711	15.1047	60.2817
132308	66.42	1.517	2.998		34.237	15.1246	60.3219
132409	66.42	1.517	2.998		34.237	15.1246	60.3219
132510	66.5	1.517	3.001		34.2783	15.1246	60.3823
132610	66.68	1.519	2.999		34.3711	15.1446	60.3421
132710	65.76	1.521	2.995		33.8968	15.1645	60.2616
132810	65.92	1.521	2.997		33.9793	15.1645	60.3018
132911	66.72	1.522	2.998		34.3917	15.1745	60.3219
133012	66.58	1.523	2.999		34.3195	15.1844	60.3421
133112	66.4	1.523	2.995		34.2267	15.1844	60.2616
133212	66.58	1.525	2.993		34.3195	15.2044	60.2213
133312	66.62	1.526	2.998		34.3401	15.2144	60.3219
133413	66.68	1.527	2.999		34.3711	15.2243	60.3421
133514	66.58	1.528	2.996		34.3195	15.2343	60.2817
133614	66.36	1.529	2.998		34.2061	15.2443	60.3219
133714	66.4	1.529	2.998		34.2267	15.2443	60.3219
133814	66.54	1.529	2.996		34.2989	15.2443	60.2817
133915	66.8	1.533	2.996		34.4329	15.2841	60.2817
134016	66.66	1.533	2.996		34.3608	15.2841	60.2817
134117	66.66	1.533	2.996		34.3608	15.2841	60.2817
134218	66.84	1.535	2.996		34.4535	15.3041	60.2817
134318	66.92	1.536	2.994		34.4948	15.3141	60.2414
134418	66.58	1.537	2.999		34.3195	15.324	60.3421
134518	66.72	1.537	2.996		34.3917	15.324	60.2817
134619	66.96	1.539	2.999		34.5154	15.344	60.3421
134720	67.04	1.541	2.998		34.5566	15.3639	60.3219
134820	66.76	1.541	3.001		34.4123	15.3639	60.3823
134920	66.72	1.541	2.999		34.3917	15.3639	60.3421
135020	66.94	1.543	2.997		34.5051	15.3838	60.3018
135121	66.98	1.545	2.998		34.5257	15.4038	60.3219
135222	66.74	1.546	2.996		34.402	15.4138	60.2817
135322	66.64	1.546	2.998		34.3504	15.4138	60.3219
135422	66.54	1.546	2.999		34.2989	15.4138	60.3421
135522	66.9	1.547	2.997		34.4845	15.4237	60.3018
135623	67.04	1.549	2.996		34.5566	15.4437	60.2817
135724	66.88	1.551	2.998		34.4742	15.4636	60.3219
135824	65.54	1.551	2.995		33.7834	15.4636	60.2616
135924	65.74	1.551	2.999		33.8865	15.4636	60.3421
136024	67.1	1.553	2.998		34.5876	15.4835	60.3219
136125	67.3	1.554	2.997		34.6906	15.4935	60.3018
136226	65.04	1.557	2.994		33.5257	15.5234	60.2414
136327	64.88	1.555	2.996		33.4432	15.5035	60.2817
136428	67.02	1.556	2.998		34.5463	15.5135	60.3219
136528	67.14	1.56	3.001		34.6082	15.5533	60.3823
136628	66.42	1.559	2.994		34.237	15.5434	60.2414
136728	66.5	1.559	2.994		34.2783	15.5434	60.2414
136829	67.08	1.561	2.996		34.5772	15.5633	60.2817
136930	67.08	1.563	2.998		34.5772	15.5833	60.3219
137030	66.82	1.563	2.997		34.4432	15.5833	60.3018
137130	66.86	1.563	2.998		34.4638	15.5833	60.3219
137230	67.12	1.565	2.998		34.5979	15.6032	60.3219
137331	67.18	1.567	2.996		34.6288	15.6231	60.2817
137432	66.6	1.568	2.998		34.3298	15.6331	60.3219
137532	66.74	1.567	2.997		34.402	15.6231	60.3018
137632	67.22	1.569	2.999		34.6494	15.6431	60.3421
137732	67.38	1.569	2.998		34.7319	15.6431	60.3219
137833	67.38	1.569	2.998		34.7319	15.6431	60.3219
137934	67.38	1.569	2.998		34.7319	15.6431	60.3219
138035	67.18	1.568	2.999		34.6288	15.6331	60.3421
138136	67.18	1.568	2.999		34.6288	15.6331	60.3421
138236	66.62	1.576	3.002		34.3401	15.7129	60.4024
138336	66.62	1.576	3.002		34.3401	15.7129	60.4024
138436	66.98	1.576	3		34.5257	15.7129	60.3622
138537	67.34	1.577	2.994		34.7113	15.7228	60.2414
138638	67.56	1.581	2.999		34.8247	15.7627	60.3421
138738	67.56	1.581	2.999		34.8247	15.7627	60.3421
138838	67.56	1.581	2.999		34.8247	15.7627	60.3421
138938	67.42	1.582	2.998		34.7525	15.7727	60.3219
139039	67.22	1.585	2.997		34.6494	15.8026	60.3018
139140	67.22	1.585	2.997		34.6494	15.8026	60.3018
139240	67.46	1.585	2.997		34.7731	15.8026	60.3018
139340	67.62	1.585	3.001		34.8556	15.8026	60.3823
139440	66.82	1.588	2.997		34.4432	15.8325	60.3018
139541	66.82	1.588	2.997		34.4432	15.8325	60.3018
139642	67.52	1.589	2.999		34.804	15.8425	60.3421
139743	67.66	1.59	3.001		34.8762	15.8524	60.3823
139844	67.66	1.59	3.001		34.8762	15.8524	60.3823
139944	67.56	1.592	2.997		34.8247	15.8724	60.3018
140044	67.6	1.593	2.997		34.8453	15.8824	60.3018
140144	67.98	1.595	2.996		35.0412	15.9023	60.2817
140245	67.46	1.6	2.998		34.7731	15.9521	60.3219
140346	67.46	1.6	2.998		34.7731	15.9521	60.3219
140446	67.46	1.6	2.998		34.7731	15.9521	60.3219
140546	67.64	1.598	3		34.8659	15.9322	60.3622
140646	67.64	1.598	3		34.8659	15.9322	60.3622
140747	67.42	1.598	2.995		34.7525	15.9322	60.2616
140848	67.66	1.601	2.996		34.8762	15.9621	60.2817
140948	67.66	1.601	2.996		34.8762	15.9621	60.2817
141048	65.32	1.608	2.993		33.67	16.0319	60.2213
141148	65.44	1.603	2.997		33.7319	15.9821	60.3018
141249	67.16	1.603	2.998		34.6185	15.9821	60.3219
141350	67.64	1.607	2.995		34.8659	16.0219	60.2616
141451	67.64	1.607	2.996		34.8659	16.0219	60.2817
141552	67.92	1.606	2.999		35.0102	16.012	60.3421
141652	67.94	1.611	2.997		35.0205	16.0618	60.3018
141752	65.74	1.612	2.997		33.8865	16.0718	60.3018
141852	65.86	1.61	2.997		33.9484	16.0518	60.3018
141953	67.98	1.612	2.997		35.0412	16.0718	60.3018
142054	67.94	1.614	2.998		35.0205	16.0917	60.3219
142154	67.86	1.614	2.998		34.9793	16.0917	60.3219
142254	68	1.615	2.996		35.0515	16.1017	60.2817
142354	68.08	1.615	2.998		35.0927	16.1017	60.3219
142455	68.08	1.618	2.996		35.0927	16.1316	60.2817
142556	67.94	1.618	2.997		35.0205	16.1316	60.3018
142656	68.14	1.619	2.999		35.1236	16.1416	60.3421
142756	68.18	1.62	2.997		35.1443	16.1515	60.3018
142856	68.2	1.622	2.999		35.1546	16.1715	60.3421
142957	67.94	1.623	2.997		35.0205	16.1815	60.3018
143058	68	1.623	2.997		35.0515	16.1815	60.3018
143159	68.14	1.624	2.998		35.1236	16.1914	60.3219
143260	68.14	1.625	2.997		35.1236	16.2014	60.3018
143360	68.3	1.625	3.002		35.2061	16.2014	60.4024
143460	68.3	1.625	3.002		35.2061	16.2014	60.4024
143560	67.38	1.633	2.999		34.7319	16.2812	60.3421
143661	67.38	1.633	2.999		34.7319	16.2812	60.3421
143762	67.44	1.629	2.998		34.7628	16.2413	60.3219
143862	67.44	1.629	2.998		34.7628	16.2413	60.3219
143962	66.64	1.633	3		34.3504	16.2812	60.3622
144062	66.52	1.631	2.997		34.2886	16.2612	60.3018
144163	68.52	1.634	2.998		35.3195	16.2911	60.3219
144264	68.16	1.638	2.994		35.1339	16.331	60.2414
144364	68.16	1.638	2.994		35.1339	16.331	60.2414
144464	67.98	1.636	2.997		35.0412	16.3111	60.3018
144564	68.24	1.64	3.002		35.1752	16.3509	60.4024
144665	67.98	1.638	2.997		35.0412	16.331	60.3018
144766	68.42	1.64	2.998		35.268	16.3509	60.3219
144867	68.5	1.641	2.997		35.3092	16.3609	60.3018
144968	68.62	1.642	2.995		35.3711	16.3709	60.2616
145068	68.56	1.644	2.997		35.3401	16.3908	60.3018
145168	68.52	1.644	2.998		35.3195	16.3908	60.3219
145268	68.5	1.644	2.996		35.3092	16.3908	60.2817
145369	68.54	1.646	2.998		35.3298	16.4108	60.3219
145470	68.76	1.646	2.999		35.4432	16.4108	60.3421
145570	68.84	1.649	2.997		35.4845	16.4407	60.3018
145670	68.48	1.65	2.995		35.2989	16.4506	60.2616
145770	68.02	1.65	2.996		35.0618	16.4506	60.2817
145871	68.7	1.65	2.998		35.4123	16.4506	60.3219
145972	68.9	1.653	2.999		35.5154	16.4806	60.3421
146072	68.6	1.654	2.995		35.3607	16.4905	60.2616
146172	68.64	1.653	2.998		35.3814	16.4806	60.3219
146272	68.78	1.655	2.999		35.4535	16.5005	60.3421
146373	68.88	1.658	2.996		35.5051	16.5304	60.2817
146474	68.88	1.658	2.996		35.5051	16.5304	60.2817
146574	68.88	1.658	2.996		35.5051	16.5304	60.2817
146674	68.72	1.66	2.999		35.4226	16.5503	60.3421
146774	68.68	1.661	3		35.402	16.5603	60.3622
146875	68.62	1.661	2.999		35.3711	16.5603	60.3421
146976	68.68	1.661	2.996		35.402	16.5603	60.2817
147077	68.9	1.664	2.996		35.5154	16.5902	60.2817
147178	68.5	1.665	2.996		35.3092	16.6002	60.2817
147278	68.5	1.665	2.996		35.3092	16.6002	60.2817
147378	68.96	1.666	3		35.5463	16.6102	60.3622
147478	68.96	1.668	2.994		35.5463	16.6301	60.2414
147579	68.6	1.669	2.999		35.3607	16.6401	60.3421
147680	68.6	1.669	2.999		35.3607	16.6401	60.3421
147780	69	1.667	2.998		35.5669	16.6201	60.3219
147880	67.6	1.673	2.998		34.8453	16.68	60.3219
147980	67.6	1.673	2.998		34.8453	16.68	60.3219
148081	68.98	1.673	2.996		35.5566	16.68	60.2817
148182	68.82	1.675	3		35.4742	16.6999	60.3622
148282	68.62	1.676	2.997		35.3711	16.7099	60.3018
148382	68.82	1.675	2.996		35.4742	16.6999	60.2817
148482	69.14	1.677	2.998		35.6391	16.7198	60.3219
148583	69.06	1.68	2.999		35.5979	16.7498	60.3421
148684	68.9	1.68	2.998		35.5154	16.7498	60.3219
148785	68.9	1.679	2.998		35.5154	16.7398	60.3219
148886	69.12	1.682	2.997		35.6288	16.7697	60.3018
148986	69.02	1.683	2.998		35.5772	16.7797	60.3219
149086	68.94	1.682	2.996		35.536	16.7697	60.2817
149186	69.06	1.684	3.001		35.5979	16.7896	60.3823
149287	69.04	1.685	2.998		35.5876	16.7996	60.3219
149388	69.08	1.686	2.995		35.6082	16.8096	60.2616
149488	69.06	1.688	2.997		35.5979	16.8295	60.3018
149588	69.12	1.688	2.998		35.6288	16.8295	60.3219
149688	69.1	1.69	2.996		35.6185	16.8495	60.2817
149789	69.02	1.691	2.998		35.5772	16.8594	60.3219
149890	69.04	1.691	2.994		35.5876	16.8594	60.2414
149990	69.04	1.693	2.995		35.5876	16.8794	60.2616
150090	69.14	1.693	2.998		35.6391	16.8794	60.3219
150190	69.12	1.694	2.998		35.6288	16.8893	60.3219
150291	69.18	1.695	2.998		35.6597	16.8993	60.3219
150392	69.12	1.696	2.995		35.6288	16.9093	60.2616
150493	69.14	1.697	2.994		35.6391	16.9192	60.2414
150594	69.22	1.699	2.998		35.6803	16.9392	60.3219
150694	69.26	1.7	2.998		35.701	16.9492	60.3219
150794	69.3	1.699	2.999		35.7216	16.9392	60.3421
150894	69.4	1.702	3		35.7731	16.9691	60.3622
150995	69.2	1.702	2.998		35.67	16.9691	60.3219
151096	69.16	1.704	2.998		35.6494	16.989	60.3219
151196	68.8	1.703	2.996		35.4638	16.9791	60.2817
151296	69	1.704	2.999		35.5669	16.989	60.3421
151396	69.44	1.706	2.999		35.7937	17.009	60.3421
151497	68.94	1.709	2.999		35.536	17.0389	60.3421
151598	68.94	1.709	2.999		35.536	17.0389	60.3421
151698	69.06	1.708	2.997		35.5979	17.0289	60.3018
151798	69.42	1.712	2.997		35.7834	17.0688	60.3018
151898	69.42	1.712	2.997		35.7834	17.0688	60.3018
151999	69.24	1.712	2.998		35.6906	17.0688	60.3219
152100	69.42	1.713	2.995		35.7834	17.0788	60.2616
152201	69.16	1.716	2.996		35.6494	17.1087	60.2817
152302	69.16	1.715	2.996		35.6494	17.0987	60.2817
152402	69.38	1.716	2.998		35.7628	17.1087	60.3219
152502	69.46	1.718	2.997		35.804	17.1286	60.3018
152602	69.34	1.719	2.998		35.7422	17.1386	60.3219
152703	69.28	1.719	2.996		35.7113	17.1386	60.2817
152804	69.22	1.72	3		35.6803	17.1486	60.3622
152904	69.4	1.722	2.997		35.7731	17.1685	60.3018
153004	69.5	1.723	2.998		35.8247	17.1785	60.3219
153104	69.48	1.724	2.998		35.8144	17.1884	60.3219
153205	69.32	1.724	2.999		35.7319	17.1884	60.3421
153306	69.24	1.725	2.997		35.6906	17.1984	60.3018
153406	69.3	1.726	2.996		35.7216	17.2084	60.2817
153506	69.52	1.729	2.999		35.835	17.2383	60.3421
153606	69.26	1.729	2.998		35.701	17.2383	60.3219
153707	68.96	1.729	2.998		35.5463	17.2383	60.3219
153808	69.26	1.73	2.997		35.701	17.2483	60.3018
153909	69.44	1.732	2.998		35.7937	17.2682	60.3219
154010	69.52	1.731	2.999		35.835	17.2582	60.3421
154110	69.46	1.735	2.999		35.804	17.2981	60.3421
154210	68.42	1.735	2.994		35.268	17.2981	60.2414
154310	68.4	1.733	2.996		35.2577	17.2782	60.2817
154411	69.46	1.737	2.997		35.804	17.318	60.3018
154512	69.22	1.738	2.998		35.6803	17.328	60.3219
154612	68.6	1.739	2.998		35.3607	17.338	60.3219
154712	68.76	1.738	2.998		35.4432	17.328	60.3219
154812	69.4	1.741	2.997		35.7731	17.3579	60.3018
154913	69.48	1.742	2.999		35.8144	17.3679	60.3421
155014	69.06	1.744	2.995		35.5979	17.3878	60.2616
155114	69	1.743	2.998		35.5669	17.3779	60.3219
155214	69.32	1.744	2.997		35.7319	17.3878	60.3018
155314	69.36	1.746	2.996		35.7525	17.4078	60.2817
155415	69.16	1.747	2.999		35.6494	17.4177	60.3421
155516	68.96	1.748	3		35.5463	17.4277	60.3622
155617	69.02	1.748	2.997		35.5772	17.4277	60.3018
155718	69.04	1.749	2.996		35.5876	17.4377	60.2817
155818	69.08	1.751	3		35.6082	17.4576	60.3622
155918	69.06	1.752	3		35.5979	17.4676	60.3622
156018	68.94	1.753	2.997		35.536	17.4776	60.3018
156119	68.78	1.753	2.997		35.4535	17.4776	60.3018
156220	68.52	1.754	2.998		35.3195	17.4875	60.3219
156320	68.92	1.754	2.999		35.5257	17.4875	60.3421
156420	69.24	1.758	2.997		35.6906	17.5274	60.3018
156520	67.04	1.758	2.996		34.5566	17.5274	60.2817
156621	67.3	1.758	2.997		34.6906	17.5274	60.3018
156722	67.3	1.758	2.997		34.6906	17.5274	60.3018
156822	67.14	1.76	2.998		34.6082	17.5474	60.3219
156922	67.9	1.76	3		34.9999	17.5474	60.3622
157022	68.74	1.763	2.999		35.4329	17.5773	60.3421
157123	68.58	1.763	2.997		35.3504	17.5773	60.3018
157224	68.46	1.764	2.998		35.2886	17.5872	60.3219
157324	68.66	1.765	2.999		35.3917	17.5972	60.3421
157424	68.86	1.767	3.001		35.4948	17.6171	60.3823
157524	68.5	1.769	2.996		35.3092	17.6371	60.2817
157625	68.5	1.769	2.996		35.3092	17.6371	60.2817
157726	68.76	1.769	2.997		35.4432	17.6371	60.3018
157827	68.84	1.771	3		35.4845	17.657	60.3622
157928	68.92	1.773	2.995		35.5257	17.677	60.2616
158028	68.92	1.773	2.995		35.5257	17.677	60.2616
158128	68.92	1.773	2.995		35.5257	17.677	60.2616
158228	68.96	1.774	2.998		35.5463	17.6869	60.3219
158329	68.38	1.777	2.997		35.2473	17.7168	60.3018
158430	68.38	1.777	2.997		35.2473	17.7168	60.3018
158530	68.68	1.777	2.996		35.402	17.7168	60.2817
158630	68.8	1.778	2.998		35.4638	17.7268	60.3219
158730	68.86	1.779	2.996		35.4948	17.7368	60.2817
158831	68.9	1.78	2.995		35.5154	17.7468	60.2616
158932	68.72	1.782	2.997		35.4226	17.7667	60.3018
159032	68.56	1.782	2.997		35.3401	17.7667	60.3018
159132	68.62	1.783	2.996		35.3711	17.7767	60.2817
159232	68.62	1.785	2.999		35.3711	17.7966	60.3421
159333	68.7	1.785	3		35.4123	17.7966	60.3622
159434	68.58	1.786	2.996		35.3504	17.8066	60.2817
159535	68.52	1.787	2.996		35.3195	17.8166	60.2817
159636	68.82	1.789	2.998		35.4742	17.8365	60.3219
159736	68.6	1.79	2.999		35.3607	17.8465	60.3421
159836	68.6	1.79	2.999		35.3607	17.8465	60.3421
159936	68.32	1.791	2.998		35.2164	17.8564	60.3219
160037	68.68	1.793	2.998		35.402	17.8764	60.3219
160138	67.68	1.795	2.999		34.8865	17.8963	60.3421
160238	67.68	1.795	2.999		34.8865	17.8963	60.3421
160338	67.54	1.794	2.997		34.8144	17.8863	60.3018
160438	67.54	1.794	2.997		34.8144	17.8863	60.3018
160539	67.6	1.798	2.997		34.8453	17.9262	60.3018
160640	67.6	1.798	2.997		34.8453	17.9262	60.3018
160740	67.76	1.799	2.998		34.9278	17.9362	60.3219
160840	68	1.802	2.998		35.0515	17.9661	60.3219
160940	67.02	1.802	2.995		34.5463	17.9661	60.2616
161041	67.02	1.802	2.995		34.5463	17.9661	60.2616
161142	67.84	1.803	2.997		34.969	17.9761	60.3018
161243	67.9	1.805	2.998		34.9999	17.996	60.3219
161344	67.5	1.806	2.999		34.7937	18.006	60.3421
161444	67.66	1.807	2.996		34.8762	18.016	60.2817
161544	68.06	1.807	2.997		35.0824	18.016	60.3018
161644	68.1	1.811	2.998		35.103	18.0558	60.3219
161745	66.52	1.81	2.999		34.2886	18.0459	60.3421
161846	66.88	1.81	2.995		34.4742	18.0459	60.2616
161946	68	1.811	2.996		35.0515	18.0558	60.2817
162046	68	1.814	2.996		35.0515	18.0857	60.2817
162146	68	1.814	2.996		35.0515	18.0857	60.2817
162247	67.58	1.813	2.996		34.835	18.0758	60.2817
162348	68.14	1.816	2.996		35.1236	18.1057	60.2817
162448	67.92	1.818	2.998		35.0102	18.1256	60.3219
162548	67.92	1.818	2.998		35.0102	18.1256	60.3219
162648	67.48	1.818	2.994		34.7834	18.1256	60.2414
162749	68.1	1.821	2.997		35.103	18.1555	60.3018
162850	67.84	1.822	2.998		34.969	18.1655	60.3219
162951	67.84	1.822	2.998		34.969	18.1655	60.3219
163052	67.54	1.821	2.995		34.8144	18.1555	60.2616
163152	68.12	1.824	2.997		35.1133	18.1854	60.3018
163252	68.1	1.826	2.999		35.103	18.2054	60.3421
163352	68.1	1.826	2.999		35.103	18.2054	60.3421
163453	68.1	1.826	2.999		35.103	18.2054	60.3421
163554	68.22	1.828	2.998		35.1649	18.2253	60.3219
163654	67.9	1.83	2.996		34.9999	18.2453	60.2817
163754	67.9	1.83	2.996		34.9999	18.2453	60.2817
163854	67.96	1.83	2.998		35.0309	18.2453	60.3219
163955	68.26	1.831	2.996		35.1855	18.2552	60.2817
164056	66.84	1.834	2.996		34.4535	18.2851	60.2817
164156	66.52	1.833	2.999		34.2886	18.2752	60.3421
164256	67.96	1.835	2.996		35.0309	18.2951	60.2817
164356	68.18	1.838	2.997		35.1443	18.325	60.3018
164457	67.38	1.838	2.995		34.7319	18.325	60.2616
164558	67.38	1.838	2.995		34.7319	18.325	60.2616
164659	68.02	1.838	2.997		35.0618	18.325	60.3018
164760	67.98	1.84	2.998		35.0412	18.345	60.3219
164860	67.98	1.84	2.998		35.0412	18.345	60.3219
164960	67.7	1.841	2.996		34.8968	18.3549	60.2817
165060	67.92	1.844	2.998		35.0102	18.3848	60.3219
165161	67.88	1.844	2.998		34.9896	18.3848	60.3219
165262	67.88	1.844	2.998		34.9896	18.3848	60.3219
165362	67.76	1.845	2.998		34.9278	18.3948	60.3219
165462	67.84	1.848	2.996		34.969	18.4247	60.2817
165562	67.52	1.849	2.999		34.804	18.4347	60.3421
165663	67.52	1.849	2.999		34.804	18.4347	60.3421
165764	67.66	1.85	2.998		34.8762	18.4447	60.3219
165864	67.8	1.851	3		34.9484	18.4546	60.3622
165964	67.5	1.853	2.998		34.7937	18.4746	60.3219
166064	67.36	1.853	2.998		34.7216	18.4746	60.3219
166165	67.6	1.854	2.997		34.8453	18.4845	60.3018
166266	67.68	1.855	2.997		34.8865	18.4945	60.3018
166367	67.78	1.857	2.996		34.9381	18.5145	60.2817
166468	67.52	1.858	2.998		34.804	18.5244	60.3219
166568	67.52	1.858	2.998		34.804	18.5244	60.3219
166668	67.6	1.858	2.998		34.8453	18.5244	60.3219
166768	67.8	1.86	2.998		34.9484	18.5444	60.3219
166869	67.96	1.863	2.997		35.0309	18.5743	60.3018
166970	65.8	1.862	2.998		33.9175	18.5643	60.3219
167070	65.48	1.861	2.994		33.7525	18.5543	60.2414
167170	67.66	1.865	2.998		34.8762	18.5942	60.3219
167270	67.5	1.866	2.997		34.7937	18.6042	60.3018
167371	67.5	1.866	2.997		34.7937	18.6042	60.3018
167472	67.46	1.866	2.999		34.7731	18.6042	60.3421
167572	67.64	1.868	2.998		34.8659	18.6241	60.3219
167672	67.2	1.87	2.998		34.6391	18.6441	60.3219
167772	67.2	1.87	2.998		34.6391	18.6441	60.3219
167873	67.3	1.87	2.997		34.6906	18.6441	60.3018
167974	67.68	1.873	2.997		34.8865	18.674	60.3018
168074	66.9	1.874	2.997		34.4845	18.6839	60.3018
168174	66.9	1.874	2.997		34.4845	18.6839	60.3018
168274	67.42	1.874	2.999		34.7525	18.6839	60.3421
168375	67.44	1.877	2.997		34.7628	18.7139	60.3018
168476	67.44	1.877	2.997		34.7628	18.7139	60.3018
168577	67.18	1.878	2.997		34.6288	18.7238	60.3018
168678	67.44	1.88	2.998		34.7628	18.7438	60.3219
168778	67.62	1.877	2.998		34.8556	18.7139	60.3219
168878	66.22	1.886	2.997		34.1339	18.8036	60.3018
168978	65.8	1.878	2.996		33.9175	18.7238	60.2817
169079	65.8	1.878	2.996		33.9175	18.7238	60.2817
169180	65.96	1.884	2.996		33.9999	18.7836	60.2817
169280	66.9	1.886	2.998		34.4845	18.8036	60.3219
169380	67.1	1.886	2.998		34.5876	18.8036	60.3219
169480	67.32	1.887	2.999		34.701	18.8136	60.3421
169581	67.22	1.889	2.996		34.6494	18.8335	60.2817
169682	67.2	1.888	2.998		34.6391	18.8235	60.3219
169782	67.3	1.89	2.998		34.6906	18.8435	60.3219
169882	66.98	1.892	3		34.5257	18.8634	60.3622
169982	67.14	1.892	2.998		34.6082	18.8634	60.3219
170083	67.36	1.894	2.998		34.7216	18.8833	60.3219
170184	67.18	1.894	2.998		34.6288	18.8833	60.3219
170285	67.02	1.895	2.998		34.5463	18.8933	60.3219
170386	67.08	1.895	2.996		34.5772	18.8933	60.2817
170486	67.12	1.898	2.998		34.5979	18.9232	60.3219
170586	67.18	1.896	2.999		34.6288	18.9033	60.3421
170686	67.12	1.901	2.997		34.5979	18.9531	60.3018
170787	67.12	1.901	2.997		34.5979	18.9531	60.3018
170888	66.64	1.901	2.996		34.3504	18.9531	60.2817
170988	67.02	1.902	2.995		34.5463	18.9631	60.2616
171088	66.86	1.904	2.995		34.4638	18.9831	60.2616
171188	66.86	1.903	2.994		34.4638	18.9731	60.2414
171289	66.98	1.905	2.997		34.5257	18.993	60.3018
171390	66.84	1.907	2.998		34.4535	19.013	60.3219
171490	66.88	1.907	3		34.4742	19.013	60.3622
171590	66.86	1.908	3		34.4638	19.0229	60.3622
171690	66.8	1.91	2.996		34.4329	19.0429	60.2817
171791	66.84	1.91	2.996		34.4535	19.0429	60.2817
171892	66.82	1.911	2.996		34.4432	19.0528	60.2817
171993	66.9	1.911	2.998		34.4845	19.0528	60.3219
172094	66.9	1.913	2.997		34.4845	19.0728	60.3018
172194	66.8	1.914	2.997		34.4329	19.0828	60.3018
172294	66.74	1.915	2.998		34.402	19.0927	60.3219
172394	66.74	1.916	2.995		34.402	19.1027	60.2616
172495	66.72	1.917	2.999		34.3917	19.1127	60.3421
172596	66.74	1.918	2.999		34.402	19.1226	60.3421
172696	66.82	1.919	2.998		34.4432	19.1326	60.3219
172796	66.86	1.921	2.997		34.4638	19.1525	60.3018
172896	66.86	1.922	2.996		34.4638	19.1625	60.2817
172997	66.48	1.922	2.995		34.268	19.1625	60.2616
173098	66.76	1.922	2.996		34.4123	19.1625	60.2817
173198	66.9	1.924	2.999		34.4845	19.1825	60.3421
173298	67.04	1.925	2.998		34.5566	19.1924	60.3219
173398	66.94	1.927	2.997		34.5051	19.2124	60.3018
173499	66.12	1.928	2.997		34.0824	19.2223	60.3018
173600	65.78	1.927	2.996		33.9071	19.2124	60.2817
173701	66.96	1.93	3.001		34.5154	19.2423	60.3823
173802	66.52	1.932	2.995		34.2886	19.2622	60.2616
173902	66.52	1.932	2.995		34.2886	19.2622	60.2616
174002	66.66	1.932	2.998		34.3608	19.2622	60.3219
174102	66.8	1.934	2.996		34.4329	19.2822	60.2817
174203	66.56	1.934	2.997		34.3092	19.2822	60.3018
174304	66.68	1.936	2.998		34.3711	19.3021	60.3219
174404	66.84	1.936	2.999		34.4535	19.3021	60.3421
174504	66.88	1.938	2.999		34.4742	19.322	60.3421
174604	66.8	1.939	3		34.4329	19.332	60.3622
174705	66.72	1.939	2.995		34.3917	19.332	60.2616
174806	66.82	1.939	2.996		34.4432	19.332	60.2817
174906	66.82	1.941	2.996		34.4432	19.3519	60.2817
175006	66.9	1.943	2.996		34.4845	19.3719	60.2817
175106	66.76	1.944	2.998		34.4123	19.3819	60.3219
175207	66.76	1.944	2.998		34.4123	19.3819	60.3219
175308	66.72	1.945	2.997		34.3917	19.3918	60.3018
175409	66.84	1.947	2.998		34.4535	19.4118	60.3219
175510	66.68	1.948	2.998		34.3711	19.4217	60.3219
175610	66.66	1.949	2.997		34.3608	19.4317	60.3018
175710	66.62	1.949	2.997		34.3401	19.4317	60.3018
175810	66.64	1.95	2.995		34.3504	19.4417	60.2616
175911	66.68	1.95	2.999		34.3711	19.4417	60.3421
176012	66.7	1.952	2.999		34.3814	19.4616	60.3421
176112	66.84	1.953	3.001		34.4535	19.4716	60.3823
176212	66.7	1.955	2.997		34.3814	19.4915	60.3018
176312	66.66	1.956	2.999		34.3608	19.5015	60.3421
176413	66.58	1.956	2.998		34.3195	19.5015	60.3219
176514	66.56	1.956	2.995		34.3092	19.5015	60.2616
176614	66.48	1.958	2.997		34.268	19.5214	60.3018
176714	66.52	1.958	2.996		34.2886	19.5214	60.2817
176814	66.58	1.961	2.997		34.3195	19.5513	60.3018
176915	66.54	1.961	2.996		34.2989	19.5513	60.2817
177016	66.52	1.962	2.997		34.2886	19.5613	60.3018
177117	66.46	1.962	2.996		34.2577	19.5613	60.2817
177218	66.44	1.964	2.996		34.2473	19.5813	60.2817
177318	66.4	1.964	2.997		34.2267	19.5813	60.3018
177418	66.46	1.967	2.997		34.2577	19.6112	60.3018
177518	66.46	1.967	2.998		34.2577	19.6112	60.3219
177619	66.46	1.968	2.998		34.2577	19.6211	60.3219
177720	66.54	1.97	2.997		34.2989	19.6411	60.3018
177820	66.42	1.971	2.997		34.237	19.651	60.3018
177920	66.44	1.972	2.997		34.2473	19.661	60.3018
178020	66.4	1.972	2.997		34.2267	19.661	60.3018
178121	66.44	1.973	2.999		34.2473	19.671	60.3421
178222	66.4	1.974	2.998		34.2267	19.681	60.3219
178322	66.44	1.975	3		34.2473	19.6909	60.3622
178422	66.38	1.976	2.995		34.2164	19.7009	60.2616
178522	66.42	1.978	2.997		34.237	19.7208	60.3018
178623	66.4	1.979	2.998		34.2267	19.7308	60.3219
178724	66.4	1.98	2.996		34.2267	19.7408	60.2817
178824	66.46	1.982	2.997		34.2577	19.7607	60.3018
178924	66.3	1.982	2.996		34.1752	19.7607	60.2817
179024	66.24	1.982	2.998		34.1443	19.7607	60.3219
179125	66.3	1.983	2.997		34.1752	19.7707	60.3018
179226	66.24	1.985	2.998		34.1443	19.7906	60.3219
179327	66.2	1.985	2.997		34.1236	19.7906	60.3018
179428	66.32	1.986	2.998		34.1855	19.8006	60.3219
179528	66.16	1.987	2.999		34.103	19.8106	60.3421
179628	66.22	1.987	2.999		34.1339	19.8106	60.3421
179728	66.36	1.988	2.998		34.2061	19.8205	60.3219
179829	66.6	1.991	2.998		34.3298	19.8504	60.3219
179930	66.48	1.992	2.998		34.268	19.8604	60.3219
180030	66.48	1.992	2.998		34.268	19.8604	60.3219
180130	66.48	1.992	2.998		34.268	19.8604	60.3219
180230	66.46	1.995	2.999		34.2577	19.8903	60.3421
180331	65.56	1.996	2.998		33.7937	19.9003	60.3219
180432	65.56	1.996	2.998		33.7937	19.9003	60.3219
180532	65.88	1.998	2.997		33.9587	19.9202	60.3018
180632	65.94	1.998	2.996		33.9896	19.9202	60.2817
180732	65.96	2	2.996		33.9999	19.9402	60.2817
180833	65.92	2.001	2.996		33.9793	19.9501	60.2817
180934	65.48	2.001	2.998		33.7525	19.9501	60.3219
181035	65.72	2.002	2.997		33.8762	19.9601	60.3018
181136	66.02	2.004	2.998		34.0309	19.9801	60.3219
181236	65.78	2.005	2.997		33.9071	19.99	60.3018
181336	65.66	2.006	2.996		33.8453	20	60.2817
181436	65.76	2.005	2.996		33.8968	19.99	60.2817
181537	65.72	2.007	2.998		33.8762	20.01	60.3219
181638	65.92	2.009	2.999		33.9793	20.0299	60.3421
181738	65.6	2.009	2.997		33.8144	20.0299	60.3018
181838	65.34	2.01	2.997		33.6803	20.0399	60.3018
181938	65.86	2.01	2.999		33.9484	20.0399	60.3421
182039	65.96	2.013	2.995		33.9999	20.0698	60.2616
182140	65.56	2.014	2.996		33.7937	20.0798	60.2817
182240	65.56	2.014	2.996		33.7937	20.0798	60.2817
182340	65.68	2.015	2.998		33.8556	20.0897	60.3219
182440	65.96	2.018	2.997		33.9999	20.1196	60.3018
182541	65.22	2.019	2.998		33.6185	20.1296	60.3219
182642	65.22	2.019	2.998		33.6185	20.1296	60.3219
182743	65.76	2.019	2.995		33.8968	20.1296	60.2616
182844	65.86	2.021	2.999		33.9484	20.1496	60.3421
182944	65.7	2.022	2.996		33.8659	20.1595	60.2817
183044	65.66	2.023	2.999		33.8453	20.1695	60.3421
183144	65.62	2.023	2.997		33.8247	20.1695	60.3018
183245	65.58	2.025	2.996		33.8041	20.1894	60.2817
183346	65.58	2.025	2.999		33.8041	20.1894	60.3421
183446	65.64	2.027	2.997		33.835	20.2094	60.3018
183546	65.54	2.027	2.996		33.7834	20.2094	60.2817
183646	65.54	2.029	2.995		33.7834	20.2293	60.2616
183747	65.54	2.029	2.998		33.7834	20.2293	60.3219
183848	65.48	2.03	2.997		33.7525	20.2393	60.3018
183948	65.5	2.031	2.997		33.7628	20.2493	60.3018
184048	65.54	2.032	3		33.7834	20.2592	60.3622
184148	65.44	2.033	2.997		33.7319	20.2692	60.3018
184249	65.36	2.034	2.997		33.6906	20.2792	60.3018
184350	65.42	2.036	3.001		33.7216	20.2991	60.3823
184451	65.46	2.036	2.997		33.7422	20.2991	60.3018
184552	65.36	2.037	2.997		33.6906	20.3091	60.3018
184652	65.3	2.038	2.997		33.6597	20.319	60.3018
184752	65.4	2.04	2.999		33.7113	20.339	60.3421
184852	65.4	2.042	3		33.7113	20.3589	60.3622
184953	65.26	2.042	2.996		33.6391	20.3589	60.2817
185054	65.24	2.043	2.999		33.6288	20.3689	60.3421
185154	65.34	2.045	2.997		33.6803	20.3888	60.3018
185254	65.26	2.044	2.996		33.6391	20.3789	60.2817
185354	65.36	2.045	2.996		33.6906	20.3888	60.2817
185455	65.24	2.046	2.999		33.6288	20.3988	60.3421
185556	65.14	2.047	2.995		33.5772	20.4088	60.2616
185656	65.2	2.049	2.996		33.6082	20.4287	60.2817
185756	65.2	2.05	2.997		33.6082	20.4387	60.3018
185856	65.16	2.05	3		33.5876	20.4387	60.3622
185957	65.18	2.051	2.998		33.5979	20.4487	60.3219
186058	65.28	2.052	2.999		33.6494	20.4586	60.3421
186159	65.24	2.054	2.998		33.6288	20.4786	60.3219
186260	65.26	2.056	2.996		33.6391	20.4985	60.2817
186360	65.3	2.056	2.999		33.6597	20.4985	60.3421
186460	65.22	2.057	2.998		33.6185	20.5085	60.3219
186560	65.22	2.057	2.998		33.6185	20.5085	60.3219
186661	64.78	2.058	2.998		33.3917	20.5184	60.3219
186762	65.28	2.06	2.997		33.6494	20.5384	60.3018
186862	65.22	2.062	2.998		33.6185	20.5583	60.3219
186962	63.56	2.062	2.996		32.7628	20.5583	60.2817
187062	63.44	2.061	2.997		32.701	20.5484	60.3018
187163	65.12	2.063	2.995		33.5669	20.5683	60.2616
187264	65.04	2.066	2.997		33.5257	20.5982	60.3018
187364	65.04	2.066	2.997		33.5257	20.5982	60.3018
187464	64.58	2.065	2.996		33.2886	20.5882	60.2817
187564	65.08	2.068	2.999		33.5463	20.6181	60.3421
187665	65.04	2.068	2.997		33.5257	20.6181	60.3018
187766	64.92	2.071	2.998		33.4638	20.6481	60.3219
187867	64.34	2.07	2.998		33.1649	20.6381	60.3219
187968	64.54	2.071	2.999		33.268	20.6481	60.3421
188068	64.86	2.074	2.997		33.4329	20.678	60.3018
188168	64.86	2.075	2.997		33.4329	20.6879	60.3018
188268	64.52	2.075	2.996		33.2577	20.6879	60.2817
188369	64.52	2.075	2.996		33.2577	20.6879	60.2817
188470	64.6	2.075	2.999		33.2989	20.6879	60.3421
188570	64.88	2.078	2.999		33.4432	20.7178	60.3421
188670	63.16	2.079	3		32.5566	20.7278	60.3622
188770	63.28	2.079	2.996		32.6185	20.7278	60.2817
188871	64.6	2.08	2.996		33.2989	20.7378	60.2817
188972	64.4	2.083	2.997		33.1958	20.7677	60.3018
189072	63.28	2.083	2.999		32.6185	20.7677	60.3421
189172	63.26	2.083	2.994		32.6082	20.7677	60.2414
189272	64.38	2.085	2.999		33.1855	20.7876	60.3421
189373	64.22	2.089	2.998		33.103	20.8275	60.3219
189474	64.22	2.089	2.998		33.103	20.8275	60.3219
189574	64.04	2.088	2.999		33.0102	20.8175	60.3421
189674	64.22	2.09	2.996		33.103	20.8375	60.2817
189774	63.72	2.091	2.996		32.8453	20.8475	60.2817
189875	63.84	2.09	2.999		32.9071	20.8375	60.3421
189976	64.06	2.091	2.997		33.0205	20.8475	60.3018
190077	64.16	2.094	2.999		33.0721	20.8774	60.3421
190178	63.86	2.093	2.999		32.9175	20.8674	60.3421
190278	63.9	2.095	2.999		32.9381	20.8873	60.3421
190378	64.02	2.095	2.996		32.9999	20.8873	60.2817
190478	64.14	2.097	2.998		33.0618	20.9073	60.3219
190579	63.94	2.098	2.997		32.9587	20.9172	60.3018
190680	63.94	2.098	2.997		32.9587	20.9172	60.3018
190780	63.96	2.099	2.997		32.969	20.9272	60.3018
190880	64.1	2.101	2.998		33.0412	20.9472	60.3219
190980	63.96	2.103	2.998		32.969	20.9671	60.3219
191081	63.96	2.103	2.998		32.969	20.9671	60.3219
191182	63.6	2.103	2.994		32.7834	20.9671	60.2414
191282	64.04	2.106	2.997		33.0102	20.997	60.3018
191382	63.5	2.106	2.998		32.7319	20.997	60.3219
191482	63.66	2.106	2.995		32.8144	20.997	60.2616
191583	63.88	2.107	2.996		32.9278	21.007	60.2817
191684	63.82	2.109	2.997		32.8968	21.0269	60.3018
191785	63.76	2.11	2.999		32.8659	21.0369	60.3421
191886	63.74	2.11	2.996		32.8556	21.0369	60.2817
191986	63.66	2.111	2.996		32.8144	21.0469	60.2817
192086	63.72	2.113	3.001		32.8453	21.0668	60.3823
192186	63.86	2.113	2.999		32.9175	21.0668	60.3421
192287	63.86	2.115	2.997		32.9175	21.0867	60.3018
192388	63.76	2.116	2.998		32.8659	21.0967	60.3219
192488	63.84	2.121	2.999		32.9071	21.1466	60.3421
192588	63.84	2.121	2.999		32.9071	21.1466	60.3421
192688	63.84	2.121	2.999		32.9071	21.1466	60.3421
192789	63.56	2.12	2.998		32.7628	21.1366	60.3219
192890	63.26	2.122	2.994		32.6082	21.1565	60.2414
192990	62.92	2.122	2.996		32.4329	21.1565	60.2817
193090	63.48	2.122	2.997		32.7216	21.1565	60.3018
193190	63.42	2.125	2.998		32.6907	21.1864	60.3219
193291	63.42	2.125	2.998		32.6907	21.1864	60.3219
193392	63.3	2.126	2.995		32.6288	21.1964	60.2616
193493	63.38	2.127	2.996		32.67	21.2064	60.2817
193594	63.4	2.13	2.996		32.6803	21.2363	60.2817
193694	63.4	2.13	2.996		32.6803	21.2363	60.2817
193794	62.78	2.129	2.999		32.3608	21.2263	60.3421
193894	63.18	2.131	2.997		32.5669	21.2463	60.3018
193995	62.88	2.132	2.999		32.4123	21.2562	60.3421
194096	62.96	2.132	3		32.4535	21.2562	60.3622
194196	63.16	2.138	2.996		32.5566	21.3161	60.2817
194296	63.16	2.138	2.996		32.5566	21.3161	60.2817
194396	63.16	2.138	2.996		32.5566	21.3161	60.2817
194497	63.06	2.138	2.997		32.5051	21.3161	60.3018
194598	62.82	2.137	2.998		32.3814	21.3061	60.3219
194698	62.94	2.139	2.995		32.4432	21.326	60.2616
194798	63.1	2.141	2.998		32.5257	21.346	60.3219
194898	63.06	2.141	2.998		32.5051	21.346	60.3219
194999	62.98	2.143	3		32.4638	21.3659	60.3622
195100	62.88	2.142	2.996		32.4123	21.3559	60.2817
195201	63.08	2.144	2.997		32.5154	21.3759	60.3018
195302	62.98	2.145	2.996		32.4638	21.3858	60.2817
195402	62.98	2.145	2.996		32.4638	21.3858	60.2817
195502	63.08	2.147	2.997		32.5154	21.4058	60.3018
195602	63.14	2.148	2.996		32.5463	21.4158	60.2817
195703	62.72	2.15	3		32.3298	21.4357	60.3622
195804	62.74	2.15	2.999		32.3401	21.4357	60.3421
195904	63.08	2.152	2.998		32.5154	21.4556	60.3219
196004	62.88	2.153	2.996		32.4123	21.4656	60.2817
196104	62.88	2.153	2.996		32.4123	21.4656	60.2817
196205	63.08	2.153	3		32.5154	21.4656	60.3622
196306	63.26	2.156	2.997		32.6082	21.4955	60.3018
196406	62.7	2.157	2.997		32.3195	21.5055	60.3018
196506	62.7	2.157	2.997		32.3195	21.5055	60.3018
196606	63	2.157	2.997		32.4742	21.5055	60.3018
196707	62.9	2.16	2.995		32.4226	21.5354	60.2616
196808	62.9	2.16	2.995		32.4226	21.5354	60.2616
196909	62.9	2.16	2.998		32.4226	21.5354	60.3219
197010	62.78	2.162	2.998		32.3608	21.5553	60.3219
197110	62.72	2.163	2.999		32.3298	21.5653	60.3421
197210	62.68	2.164	2.998		32.3092	21.5753	60.3219
197310	62.72	2.165	2.997		32.3298	21.5852	60.3018
197411	62.92	2.166	2.999		32.4329	21.5952	60.3421
197512	62.86	2.167	2.998		32.402	21.6052	60.3219
197612	62.86	2.167	2.998		32.402	21.6052	60.3219
197712	62.6	2.168	2.998		32.268	21.6152	60.3219
197812	62.86	2.17	2.998		32.402	21.6351	60.3219
197913	62.78	2.171	3		32.3608	21.6451	60.3622
198014	62.46	2.173	2.996		32.1958	21.665	60.2817
198114	62.62	2.172	2.996		32.2783	21.655	60.2817
198214	62.86	2.174	3		32.402	21.675	60.3622

## Sheet: GD-6-3
Force (large)	--	journey	) Results Report
17:21:53,06/23/2019
Diameter: 49.7	mm	Height: 100.3	mm
Vertical force transducer (Test piece vertical force)
Control mode: force/confining pressure	Waveform: Slope
KN/s	Force the finish: 5.860	KN	Confining pressure rate :0.500	MPa/s	End point of confining pressure :3.0230	MPa
Time (ms)	Vertical force (KN)	Vertical deformation (mm)	Confining pressure (MPa)		stress	Axial strain	Lateral strain
0	0	0	0		0	0	0
200	0	-0.001	0		0	-0.00997009	0
400	0	0	0		0	0	0
600	0.36	0	0.005		0.185567	0	0.100604
800	0.62	0	0.012		0.319587	0	0.241449
1000	0.66	0	0.017		0.340205	0	0.342052
1200	0.78	0.002	0.033		0.402061	0.0199402	0.663984
1400	0.88	0.002	0.051		0.453607	0.0199402	1.02616
1600	1.16	0.006	0.072		0.597937	0.0598205	1.44869
1800	1.32	0.015	0.103		0.680411	0.149551	2.07243
2000	1.48	0.026	0.154		0.762885	0.259222	3.09859
2200	1.7	0.043	0.204		0.876287	0.428714	4.10463
2400	1.92	0.056	0.25		0.989689	0.558325	5.03018
2600	2.02	0.067	0.291		1.04123	0.667996	5.85513
2800	2.24	0.087	0.324		1.15464	0.867398	6.51911
3000	2.52	0.107	0.356		1.29897	1.0668	7.16298
3200	2.78	0.126	0.374		1.43299	1.25623	7.52515
3400	3.06	0.151	0.39		1.57732	1.50548	7.84708
3600	3.36	0.169	0.405		1.73196	1.68495	8.14889
3800	3.62	0.184	0.427		1.86598	1.8345	8.59155
4000	3.72	0.19	0.454		1.91752	1.89432	9.13481
4200	3.94	0.199	0.492		2.03092	1.98405	9.8994
4400	4.1	0.205	0.543		2.1134	2.04387	10.9256
4600	4.3	0.211	0.622		2.21649	2.10369	12.5151
4800	4.52	0.219	0.746		2.32989	2.18345	15.0101
5000	4.66	0.227	0.976		2.40206	2.26321	19.6378
5200	5.06	0.23	1.488		2.60824	2.29312	29.9396
5400	5.3	0.239	2.175		2.73195	2.38285	43.7626
5600	5.24	0.241	2.46		2.70103	2.40279	49.497
5800	5.42	0.239	2.623		2.79381	2.38285	52.7767
6000	5.52	0.245	2.965		2.84535	2.44267	59.6579
6200	5.86	0.247	3.023		3.02061	2.46261	60.8249
控制模式:围压	波形:斜坡					0
MPa/s	终点:2.9900	MPa				#VALUE!
时间(ms)	垂直力(KN)	垂直变形(mm)	围压(MPa)			#VALUE!
6350	6.02	0.254	2.977		3.10309	2.5324	59.8994
6451	6.06	0.255	2.957		3.1237	2.54237	59.497
6552	6.12	0.254	2.959		3.15463	2.5324	59.5372
6653	6.14	0.259	2.975		3.16494	2.58225	59.8592
6754	6.26	0.261	2.99		3.2268	2.60219	60.161
控制模式:行程	波形:斜坡					0
mm/s	终点:2.1740	mm				#VALUE!
时间(ms)	垂直力(KN)	垂直变形(mm)	围压(MPa)			#VALUE!
6824	6.12	0.263	2.999		3.15463	2.62213	60.3421
6924	6.12	0.263	2.999		3.15463	2.62213	60.3421
7024	6.54	0.265	2.998		3.37113	2.64207	60.3219
7125	5.98	0.268	2.997		3.08247	2.67198	60.3018
7226	5.98	0.268	2.997		3.08247	2.67198	60.3018
7327	5.76	0.266	2.997		2.96907	2.65204	60.3018
7428	5.76	0.266	2.997		2.96907	2.65204	60.3018
7528	5.82	0.269	2.997		2.99999	2.68195	60.3018
7628	6.44	0.271	2.999		3.31958	2.70189	60.3421
7728	6.44	0.271	2.999		3.31958	2.70189	60.3421
7829	6.48	0.272	2.997		3.3402	2.71186	60.3018
7930	6.7	0.274	2.995		3.4536	2.7318	60.2616
8030	5.64	0.274	2.999		2.90721	2.7318	60.3421
8130	5.86	0.274	2.997		3.02061	2.7318	60.3018
8230	5.86	0.274	2.997		3.02061	2.7318	60.3018
8331	5.98	0.279	2.998		3.08247	2.78166	60.3219
8432	5.98	0.279	2.998		3.08247	2.78166	60.3219
8532	5.98	0.279	2.998		3.08247	2.78166	60.3219
8632	6.22	0.282	2.995		3.20618	2.81157	60.2616
8732	6.22	0.282	2.995		3.20618	2.81157	60.2616
8833	6.88	0.282	2.997		3.54638	2.81157	60.3018
[truncated: 1,885 more rows]

## Sheet: GZB-2-6
Force (large)	--	journey	) Results Report
[truncated: 3,659 more rows]
