# Supplementary material for: Physical and Mechanical Properties of Gypsum‐Like Rock Materials
Source: Hindawi journal article supplement (doi:10.1155/2020/3703706), 2020-01-01
Supplement: f1 [file 3703706.f1.zip › 3703706.f1/high temperature uniaxial compression test data.xlsx]

## Sheet: GB-6
Force (small)	--	journey	) Results Report
17:21:53,06/23/2019
Diameter: 49.2	mm	Height: 99.9	mm
Vertical force transducer (Test piece vertical force)
Control mode: displacement	Waveform: Slope
mm/s	Force the finish: 1.9245	mm	Confining pressure rate :0.500	MPa/s	End point of confining pressure :6.00060	MPa
Time (ms)	Vertical force (KN)	Vertical deformation (mm)	Confining pressure (MPa)		stress	Axial strain	Lateral strain
0	0	0	0		0	0	0
200	0.016	0.0015	-0.0004		0.00841589	0.014985	-0.00813008
400	0.02	0.0022	-0.0005		0.0105199	0.021978	-0.0101626
600	0.026	0.0034	-0.0007		0.0136758	0.033966	-0.0142276
800	0.026	0.0042	-0.0008		0.0136758	0.041958	-0.0162602
1000	0.034	0.0054	-0.0009		0.0178838	0.0539461	-0.0182927
1200	0.038	0.0064	-0.0011		0.0199877	0.0639361	-0.0223577
1400	0.04	0.0072	-0.0012		0.0210397	0.0719281	-0.0243902
1600	0.044	0.0083	-0.0013		0.0231437	0.0829171	-0.0264228
1800	0.048	0.0095	-0.0014		0.0252477	0.0949051	-0.0284553
2000	0.05	0.0104	-0.0016		0.0262996	0.103896	-0.0325203
2200	0.054	0.0115	-0.0016		0.0284036	0.114885	-0.0325203
2400	0.058	0.0126	-0.0016		0.0305076	0.125874	-0.0325203
2600	0.06	0.0134	-0.0018		0.0315596	0.133866	-0.0365854
2800	0.062	0.0144	-0.0018		0.0326116	0.143856	-0.0365854
3000	0.066	0.0154	-0.0018		0.0347155	0.153846	-0.0365854
3200	0.066	0.0165	-0.0018		0.0347155	0.164835	-0.0365854
3400	0.07	0.0175	-0.0019		0.0368195	0.174825	-0.0386179
3600	0.072	0.0184	-0.0019		0.0378715	0.183816	-0.0386179
3800	0.074	0.0194	-0.0019		0.0389235	0.193806	-0.0386179
4000	0.078	0.0204	-0.002		0.0410274	0.203796	-0.0406504
4200	0.082	0.0215	-0.002		0.0431314	0.214785	-0.0406504
4400	0.08	0.0225	-0.0021		0.0420794	0.224775	-0.0426829
4600	0.084	0.0235	-0.0021		0.0441834	0.234765	-0.0426829
4800	0.084	0.0245	-0.0021		0.0441834	0.244755	-0.0426829
5000	0.086	0.0256	-0.0022		0.0452354	0.255744	-0.0447154
5200	0.086	0.0266	-0.0021		0.0452354	0.265734	-0.0426829
5400	0.09	0.0275	-0.0021		0.0473394	0.274725	-0.0426829
5600	0.092	0.0285	-0.0021		0.0483914	0.284715	-0.0426829
5800	0.09	0.0295	-0.0021		0.0473394	0.294705	-0.0426829
6000	0.096	0.0304	-0.0021		0.0504953	0.303696	-0.0426829
6200	0.098	0.0314	-0.0022		0.0515473	0.313686	-0.0447154
6400	0.1	0.0325	-0.0022		0.0525993	0.324675	-0.0447154
6600	0.104	0.0336	-0.0022		0.0547033	0.335664	-0.0447154
6800	0.106	0.0345	-0.0022		0.0557553	0.344655	-0.0447154
7000	0.11	0.0355	-0.0022		0.0578592	0.354645	-0.0447154
7200	0.11	0.0364	-0.0024		0.0578592	0.363636	-0.0487805
7400	0.114	0.0375	-0.0023		0.0599632	0.374625	-0.046748
7600	0.116	0.0385	-0.0023		0.0610152	0.384615	-0.046748
7800	0.118	0.0395	-0.0024		0.0620672	0.394605	-0.0487805
8000	0.12	0.0405	-0.0024		0.0631192	0.404595	-0.0487805
8200	0.122	0.0415	-0.0025		0.0641711	0.414585	-0.050813
8400	0.128	0.0426	-0.0024		0.0673271	0.425574	-0.0487805
8600	0.13	0.0435	-0.0024		0.0683791	0.434565	-0.0487805
8800	0.134	0.0445	-0.0025		0.0704831	0.444555	-0.050813
9000	0.134	0.0455	-0.0025		0.0704831	0.454545	-0.050813
9200	0.138	0.0467	-0.0025		0.072587	0.466533	-0.050813
9400	0.142	0.0477	-0.0026		0.074691	0.476523	-0.0528455
9600	0.144	0.0486	-0.0026		0.075743	0.485514	-0.0528455
9800	0.146	0.0495	-0.0027		0.076795	0.494505	-0.054878
10000	0.15	0.0503	-0.0027		0.0788989	0.502498	-0.054878
10200	0.152	0.0513	-0.0027		0.0799509	0.512488	-0.054878
10400	0.156	0.0523	-0.0027		0.0820549	0.522478	-0.054878
10600	0.158	0.0534	-0.0027		0.0831069	0.533467	-0.054878
10800	0.162	0.0545	-0.0027		0.0852109	0.544456	-0.054878
11000	0.166	0.0555	-0.0028		0.0873148	0.554446	-0.0569106
11200	0.17	0.0565	-0.0028		0.0894188	0.564436	-0.0569106
11400	0.172	0.0577	-0.0027		0.0904708	0.576424	-0.054878
11600	0.174	0.0585	-0.0029		0.0915228	0.584416	-0.0589431
11800	0.18	0.0596	-0.0029		0.0946787	0.595405	-0.0589431
12000	0.182	0.0606	-0.0029		0.0957307	0.605395	-0.0589431
12200	0.182	0.0615	-0.0029		0.0957307	0.614386	-0.0589431
12400	0.188	0.0623	-0.0028		0.0988867	0.622378	-0.0569106
12600	0.192	0.0635	-0.0028		0.100991	0.634366	-0.0569106
12800	0.196	0.0645	-0.0028		0.103095	0.644356	-0.0569106
13000	0.2	0.0654	-0.0027		0.105199	0.653347	-0.054878
13200	0.202	0.0666	-0.0028		0.106251	0.665335	-0.0569106
13400	0.208	0.0677	-0.0027		0.109407	0.676324	-0.054878
13600	0.212	0.0685	-0.0028		0.111511	0.684316	-0.0569106
13800	0.214	0.0695	-0.0029		0.112562	0.694306	-0.0589431
14000	0.218	0.0706	-0.0027		0.114666	0.705295	-0.054878
14200	0.22	0.0717	-0.0027		0.115718	0.716284	-0.054878
14400	0.226	0.0726	-0.0026		0.118874	0.725275	-0.0528455
14600	0.228	0.0736	-0.0027		0.119926	0.735265	-0.054878
14800	0.23	0.0749	-0.0028		0.120978	0.748252	-0.0569106
15000	0.23	0.0758	-0.0028		0.120978	0.757243	-0.0569106
15200	0.234	0.0765	-0.0029		0.123082	0.764236	-0.0589431
15400	0.236	0.0774	-0.003		0.124134	0.773227	-0.0609756
15600	0.24	0.0784	-0.003		0.126238	0.783217	-0.0609756
15800	0.246	0.0795	-0.003		0.129394	0.794206	-0.0609756
16000	0.248	0.0807	-0.0029		0.130446	0.806194	-0.0589431
16200	0.252	0.0817	-0.003		0.13255	0.816184	-0.0609756
16400	0.256	0.0828	-0.003		0.134654	0.827173	-0.0609756
16600	0.256	0.084	-0.0031		0.134654	0.839161	-0.0630081
16800	0.26	0.0849	-0.003		0.136758	0.848152	-0.0609756
17000	0.266	0.0858	-0.003		0.139914	0.857143	-0.0609756
17200	0.266	0.0867	-0.003		0.139914	0.866134	-0.0609756
17400	0.268	0.0876	-0.0031		0.140966	0.875125	-0.0630081
17600	0.272	0.0884	-0.0031		0.14307	0.883117	-0.0630081
17800	0.276	0.0895	-0.0031		0.145174	0.894106	-0.0630081
18000	0.28	0.0906	-0.0032		0.147278	0.905095	-0.0650407
18200	0.282	0.0917	-0.0032		0.14833	0.916084	-0.0650407
18400	0.288	0.0925	-0.0031		0.151486	0.924076	-0.0630081
18600	0.29	0.0934	-0.0031		0.152538	0.933067	-0.0630081
18800	0.296	0.0944	-0.0032		0.155694	0.943057	-0.0650407
19000	0.3	0.0955	-0.0033		0.157798	0.954046	-0.0670732
19200	0.306	0.0966	-0.0031		0.160954	0.965035	-0.0630081
19400	0.302	0.097	-0.0031		0.15885	0.969031	-0.0630081
19600	0.314	0.0988	-0.0033		0.165162	0.987013	-0.0670732
19800	0.314	0.0998	-0.0031		0.165162	0.997003	-0.0630081
20000	0.318	0.1005	-0.003		0.167266	1.004	-0.0609756
20200	0.324	0.1016	-0.0031		0.170422	1.01499	-0.0630081
20400	0.328	0.1024	-0.0031		0.172526	1.02298	-0.0630081
20600	0.332	0.1036	-0.0031		0.17463	1.03497	-0.0630081
20800	0.336	0.1046	-0.0031		0.176734	1.04496	-0.0630081
21000	0.34	0.1056	-0.003		0.178838	1.05495	-0.0609756
21200	0.344	0.1066	-0.0031		0.180942	1.06494	-0.0630081
21400	0.35	0.1075	-0.0031		0.184098	1.07393	-0.0630081
21600	0.352	0.1084	-0.0031		0.18515	1.08292	-0.0630081
21800	0.36	0.1096	-0.0032		0.189357	1.09491	-0.0650407
22000	0.364	0.1108	-0.0032		0.191461	1.10689	-0.0650407
22200	0.364	0.1116	-0.0031		0.191461	1.11489	-0.0630081
22400	0.37	0.1126	-0.0031		0.194617	1.12488	-0.0630081
22600	0.376	0.1135	-0.0031		0.197773	1.13387	-0.0630081
22800	0.38	0.1146	-0.0031		0.199877	1.14486	-0.0630081
23000	0.384	0.1156	-0.0031		0.201981	1.15485	-0.0630081
23200	0.386	0.1165	-0.003		0.203033	1.16384	-0.0609756
23400	0.394	0.1176	-0.003		0.207241	1.17483	-0.0609756
23600	0.396	0.1187	-0.0029		0.208293	1.18581	-0.0589431
23800	0.402	0.1196	-0.0029		0.211449	1.19481	-0.0589431
24000	0.408	0.1206	-0.0029		0.214605	1.2048	-0.0589431
24200	0.414	0.1216	-0.0029		0.217761	1.21479	-0.0589431
24400	0.414	0.1226	-0.0028		0.217761	1.22478	-0.0569106
24600	0.422	0.1236	-0.0028		0.221969	1.23477	-0.0569106
24800	0.424	0.1246	-0.0028		0.223021	1.24476	-0.0569106
25000	0.428	0.1255	-0.0028		0.225125	1.25375	-0.0569106
25200	0.434	0.1266	-0.0028		0.228281	1.26474	-0.0569106
25400	0.438	0.1275	-0.0027		0.230385	1.27373	-0.054878
25600	0.442	0.1286	-0.0026		0.232489	1.28472	-0.0528455
25800	0.45	0.1296	-0.0027		0.236697	1.29471	-0.054878
26000	0.456	0.1307	-0.0027		0.239853	1.30569	-0.054878
26200	0.458	0.1317	-0.0026		0.240905	1.31568	-0.0528455
26400	0.464	0.1328	-0.0025		0.244061	1.32667	-0.050813
26600	0.466	0.1338	-0.0025		0.245113	1.33666	-0.050813
26800	0.47	0.1348	-0.0026		0.247217	1.34665	-0.0528455
27000	0.472	0.1359	-0.0024		0.248269	1.35764	-0.0487805
27200	0.476	0.1366	-0.0026		0.250373	1.36464	-0.0528455
27400	0.482	0.1374	-0.0025		0.253529	1.37263	-0.050813
27600	0.486	0.1385	-0.0025		0.255633	1.38362	-0.050813
27800	0.494	0.1396	-0.0025		0.259841	1.39461	-0.050813
28000	0.496	0.1406	-0.0025		0.260892	1.4046	-0.050813
28200	0.504	0.1417	-0.0025		0.2651	1.41558	-0.050813
28400	0.508	0.1426	-0.0026		0.267204	1.42458	-0.0528455
28600	0.512	0.1436	-0.0026		0.269308	1.43457	-0.0528455
28800	0.518	0.1447	-0.0026		0.272464	1.44555	-0.0528455
29000	0.522	0.1456	-0.0026		0.274568	1.45455	-0.0528455
29200	0.528	0.1466	-0.0026		0.277724	1.46454	-0.0528455
29400	0.528	0.1477	-0.0026		0.277724	1.47552	-0.0528455
29600	0.534	0.1485	-0.0026		0.28088	1.48352	-0.0528455
29800	0.54	0.1496	-0.0026		0.284036	1.49451	-0.0528455
30000	0.546	0.1506	-0.0027		0.287192	1.5045	-0.054878
30200	0.55	0.1517	-0.0026		0.289296	1.51548	-0.0528455
30400	0.556	0.1525	-0.0026		0.292452	1.52348	-0.0528455
30600	0.56	0.1536	-0.0026		0.294556	1.53447	-0.0528455
30800	0.566	0.1545	-0.0026		0.297712	1.54346	-0.0528455
31000	0.572	0.1555	-0.0026		0.300868	1.55345	-0.0528455
31200	0.576	0.1566	-0.0026		0.302972	1.56444	-0.0528455
31400	0.582	0.1577	-0.0026		0.306128	1.57542	-0.0528455
31600	0.588	0.1588	-0.0025		0.309284	1.58641	-0.050813
31800	0.59	0.1597	-0.0026		0.310336	1.5954	-0.0528455
32000	0.596	0.1607	-0.0025		0.313492	1.60539	-0.050813
32200	0.598	0.1619	-0.0028		0.314544	1.61738	-0.0569106
32400	0.604	0.1629	-0.0028		0.3177	1.62737	-0.0569106
32600	0.606	0.1637	-0.0028		0.318752	1.63536	-0.0569106
32800	0.612	0.1646	-0.0027		0.321908	1.64436	-0.054878
33000	0.618	0.1657	-0.0027		0.325064	1.65534	-0.054878
33200	0.622	0.1667	-0.0027		0.327168	1.66533	-0.054878
33400	0.626	0.1676	-0.0027		0.329272	1.67433	-0.054878
33600	0.632	0.1688	-0.0026		0.332428	1.68631	-0.0528455
33800	0.638	0.1697	-0.0026		0.335583	1.6953	-0.0528455
34000	0.642	0.1709	-0.0027		0.337687	1.70729	-0.054878
34200	0.648	0.1716	-0.0026		0.340843	1.71429	-0.0528455
34400	0.65	0.1727	-0.0026		0.341895	1.72527	-0.0528455
34600	0.658	0.1736	-0.0027		0.346103	1.73427	-0.054878
34800	0.664	0.1747	-0.0026		0.349259	1.74525	-0.0528455
35000	0.668	0.1756	-0.0026		0.351363	1.75425	-0.0528455
35200	0.672	0.1765	-0.0026		0.353467	1.76324	-0.0528455
35400	0.68	0.1776	-0.0026		0.357675	1.77423	-0.0528455
35600	0.686	0.1786	-0.0026		0.360831	1.78422	-0.0528455
35800	0.69	0.1798	-0.0026		0.362935	1.7962	-0.0528455
36000	0.694	0.1807	-0.0025		0.365039	1.80519	-0.050813
36200	0.698	0.1817	-0.0025		0.367143	1.81518	-0.050813
36400	0.7	0.1826	-0.0025		0.368195	1.82418	-0.050813
36600	0.706	0.1838	-0.0025		0.371351	1.83616	-0.050813
36800	0.71	0.1845	-0.0024		0.373455	1.84316	-0.0487805
37000	0.716	0.1854	-0.0024		0.376611	1.85215	-0.0487805
37200	0.722	0.1864	-0.0024		0.379767	1.86214	-0.0487805
37400	0.728	0.1876	-0.0024		0.382923	1.87413	-0.0487805
37600	0.734	0.1886	-0.0023		0.386079	1.88412	-0.046748
37800	0.74	0.1895	-0.0023		0.389235	1.89311	-0.046748
38000	0.746	0.1906	-0.0023		0.392391	1.9041	-0.046748
38200	0.75	0.1916	-0.0023		0.394495	1.91409	-0.046748
38400	0.756	0.1926	-0.0024		0.397651	1.92408	-0.0487805
38600	0.762	0.1937	-0.0024		0.400807	1.93506	-0.0487805
38800	0.768	0.1947	-0.0024		0.403963	1.94505	-0.0487805
39000	0.772	0.1956	-0.0025		0.406067	1.95405	-0.050813
39200	0.78	0.1964	-0.0024		0.410274	1.96204	-0.0487805
39400	0.782	0.1976	-0.0025		0.411326	1.97403	-0.050813
39600	0.786	0.1985	-0.0024		0.41343	1.98302	-0.0487805
39800	0.794	0.1996	-0.0024		0.417638	1.99401	-0.0487805
40000	0.798	0.2006	-0.0024		0.419742	2.004	-0.0487805
40200	0.808	0.2016	-0.0025		0.425002	2.01399	-0.050813
40400	0.81	0.2028	-0.0024		0.426054	2.02597	-0.0487805
40600	0.816	0.2036	-0.0023		0.42921	2.03397	-0.046748
40800	0.822	0.2046	-0.0023		0.432366	2.04396	-0.046748
41000	0.826	0.2057	-0.0022		0.43447	2.05495	-0.0447154
41200	0.832	0.2066	-0.0023		0.437626	2.06394	-0.046748
41400	0.838	0.2076	-0.0021		0.440782	2.07393	-0.0426829
41600	0.844	0.2086	-0.0022		0.443938	2.08392	-0.0447154
41800	0.852	0.2097	-0.0022		0.448146	2.09491	-0.0447154
42000	0.858	0.2107	-0.0022		0.451302	2.1049	-0.0447154
42200	0.864	0.2118	-0.0022		0.454458	2.11588	-0.0447154
42400	0.868	0.2128	-0.0022		0.456562	2.12587	-0.0447154
42600	0.872	0.2138	-0.0021		0.458666	2.13586	-0.0426829
42800	0.876	0.2146	-0.0022		0.46077	2.14386	-0.0447154
43000	0.884	0.2156	-0.0022		0.464978	2.15385	-0.0447154
43200	0.888	0.2167	-0.0023		0.467082	2.16484	-0.046748
43400	0.892	0.2178	-0.0025		0.469186	2.17582	-0.050813
43600	0.898	0.2188	-0.0024		0.472342	2.18581	-0.0487805
43800	0.902	0.2198	-0.0024		0.474446	2.1958	-0.0487805
44000	0.906	0.2208	-0.0024		0.47655	2.20579	-0.0487805
44200	0.91	0.2216	-0.0024		0.478654	2.21379	-0.0487805
44400	0.914	0.2225	-0.0024		0.480758	2.22278	-0.0487805
44600	0.926	0.2236	-0.0025		0.487069	2.23377	-0.050813
44800	0.93	0.2246	-0.0025		0.489173	2.24376	-0.050813
45000	0.938	0.2256	-0.0024		0.493381	2.25375	-0.0487805
45200	0.944	0.2267	-0.0023		0.496537	2.26474	-0.046748
45400	0.95	0.2277	-0.0024		0.499693	2.27473	-0.0487805
45600	0.956	0.2288	-0.0023		0.502849	2.28571	-0.046748
45800	0.964	0.2297	-0.0024		0.507057	2.29471	-0.0487805
46000	0.968	0.2307	-0.0024		0.509161	2.3047	-0.0487805
46200	0.974	0.2316	-0.0024		0.512317	2.31369	-0.0487805
46400	0.98	0.2326	-0.0024		0.515473	2.32368	-0.0487805
46600	0.986	0.2337	-0.0024		0.518629	2.33467	-0.0487805
46800	0.992	0.2347	-0.0023		0.521785	2.34466	-0.046748
47000	1	0.2356	-0.0023		0.525993	2.35365	-0.046748
47200	1.006	0.2368	-0.0023		0.529149	2.36563	-0.046748
47400	1.012	0.2377	-0.0022		0.532305	2.37463	-0.0447154
47600	1.018	0.2386	-0.0022		0.535461	2.38362	-0.0447154
47800	1.026	0.2397	-0.0022		0.539669	2.39461	-0.0447154
48000	1.032	0.2406	-0.0021		0.542825	2.4036	-0.0426829
48200	1.04	0.2417	-0.0022		0.547033	2.41459	-0.0447154
48400	1.044	0.2428	-0.0022		0.549137	2.42557	-0.0447154
48600	1.05	0.2437	-0.0021		0.552293	2.43457	-0.0426829
48800	1.054	0.2446	-0.0021		0.554397	2.44356	-0.0426829
49000	1.064	0.2457	-0.0021		0.559656	2.45455	-0.0426829
49200	1.07	0.2466	-0.002		0.562812	2.46354	-0.0406504
49400	1.074	0.2476	-0.0021		0.564916	2.47353	-0.0426829
49600	1.08	0.2486	-0.0021		0.568072	2.48352	-0.0426829
49800	1.09	0.2497	-0.0019		0.573332	2.49451	-0.0386179
50000	1.094	0.2507	-0.002		0.575436	2.5045	-0.0406504
50200	1.098	0.2516	-0.002		0.57754	2.51349	-0.0406504
50400	1.108	0.2525	-0.0019		0.5828	2.52248	-0.0386179
50600	1.114	0.2536	-0.0019		0.585956	2.53347	-0.0386179
50800	1.122	0.2546	-0.0019		0.590164	2.54346	-0.0386179
51000	1.126	0.2555	-0.0019		0.592268	2.55245	-0.0386179
51200	1.134	0.2567	-0.0019		0.596476	2.56444	-0.0386179
51400	1.142	0.2576	-0.0018		0.600684	2.57343	-0.0365854
51600	1.146	0.2587	-0.0017		0.602788	2.58442	-0.0345528
51800	1.156	0.2597	-0.0017		0.608048	2.59441	-0.0345528
52000	1.16	0.2607	-0.0017		0.610152	2.6044	-0.0345528
52200	1.17	0.2618	-0.0017		0.615412	2.61538	-0.0345528
52400	1.174	0.2626	-0.0018		0.617516	2.62338	-0.0365854
52600	1.182	0.2637	-0.0017		0.621724	2.63437	-0.0345528
52800	1.19	0.2645	-0.0017		0.625932	2.64236	-0.0345528
53000	1.196	0.2656	-0.0017		0.629088	2.65335	-0.0345528
53200	1.204	0.2667	-0.0018		0.633295	2.66434	-0.0365854
53400	1.21	0.2675	-0.0017		0.636451	2.67233	-0.0345528
53600	1.218	0.2687	-0.0017		0.640659	2.68432	-0.0345528
53800	1.224	0.2696	-0.0016		0.643815	2.69331	-0.0325203
54000	1.232	0.2706	-0.0016		0.648023	2.7033	-0.0325203
54200	1.238	0.2716	-0.0016		0.651179	2.71329	-0.0325203
54400	1.244	0.2726	-0.0016		0.654335	2.72328	-0.0325203
54600	1.25	0.2736	-0.0016		0.657491	2.73327	-0.0325203
54800	1.258	0.2747	-0.0015		0.661699	2.74426	-0.0304878
55000	1.266	0.2757	-0.0016		0.665907	2.75425	-0.0325203
55200	1.274	0.2767	-0.0015		0.670115	2.76424	-0.0304878
55400	1.276	0.2778	-0.0015		0.671167	2.77522	-0.0304878
55600	1.282	0.2786	-0.0015		0.674323	2.78322	-0.0304878
55800	1.29	0.2796	-0.0015		0.678531	2.79321	-0.0304878
56000	1.296	0.2805	-0.0015		0.681687	2.8022	-0.0304878
56200	1.304	0.2815	-0.0015		0.685895	2.81219	-0.0304878
56400	1.312	0.2824	-0.0015		0.690103	2.82118	-0.0304878
56600	1.318	0.2835	-0.0017		0.693259	2.83217	-0.0345528
56800	1.324	0.2843	-0.0015		0.696415	2.84016	-0.0304878
57000	1.332	0.2854	-0.0016		0.700623	2.85115	-0.0325203
57200	1.338	0.2866	-0.0016		0.703779	2.86314	-0.0325203
57400	1.348	0.2874	-0.0016		0.709038	2.87113	-0.0325203
57600	1.356	0.2885	-0.0015		0.713246	2.88212	-0.0304878
57800	1.362	0.2895	-0.0015		0.716402	2.89211	-0.0304878
58000	1.37	0.2905	-0.0013		0.72061	2.9021	-0.0264228
58200	1.38	0.2915	-0.0013		0.72587	2.91209	-0.0264228
58400	1.384	0.2925	-0.0013		0.727974	2.92208	-0.0264228
58600	1.394	0.2936	-0.0012		0.733234	2.93307	-0.0243902
58800	1.404	0.2946	-0.0012		0.738494	2.94306	-0.0243902
59000	1.41	0.2956	-0.0011		0.74165	2.95305	-0.0223577
59200	1.418	0.2966	-0.0011		0.745858	2.96304	-0.0223577
59400	1.428	0.2976	-0.001		0.751118	2.97303	-0.0203252
59600	1.436	0.2986	-0.001		0.755326	2.98302	-0.0203252
59800	1.44	0.2997	-0.001		0.75743	2.99401	-0.0203252
60000	1.45	0.3006	-0.0009		0.76269	3.003	-0.0182927
60200	1.456	0.3016	-0.001		0.765846	3.01299	-0.0203252
60400	1.464	0.3026	-0.0008		0.770054	3.02298	-0.0162602
60600	1.472	0.3036	-0.0008		0.774262	3.03297	-0.0162602
60800	1.482	0.3045	-0.0008		0.779522	3.04196	-0.0162602
61000	1.486	0.3056	-0.0008		0.781626	3.05295	-0.0162602
61200	1.496	0.3066	-0.0008		0.786885	3.06294	-0.0162602
61400	1.5	0.3076	-0.0007		0.788989	3.07293	-0.0142276
61600	1.51	0.3086	-0.0006		0.794249	3.08292	-0.0121951
61800	1.52	0.3096	-0.0006		0.799509	3.09291	-0.0121951
62000	1.53	0.3106	-0.0005		0.804769	3.1029	-0.0101626
62200	1.536	0.3116	-0.0005		0.807925	3.11289	-0.0101626
62400	1.546	0.3126	-0.0005		0.813185	3.12288	-0.0101626
62600	1.554	0.3135	-0.0005		0.817393	3.13187	-0.0101626
62800	1.562	0.3146	-0.0003		0.821601	3.14286	-0.00609756
63000	1.57	0.3156	-0.0004		0.825809	3.15285	-0.00813008
63200	1.58	0.3165	-0.0004		0.831069	3.16184	-0.00813008
63400	1.588	0.3177	-0.0004		0.835277	3.17383	-0.00813008
63600	1.596	0.3186	-0.0003		0.839485	3.18282	-0.00609756
63800	1.604	0.3197	-0.0003		0.843693	3.19381	-0.00609756
64000	1.612	0.3207	-0.0002		0.847901	3.2038	-0.00406504
64200	1.618	0.3216	-0.0002		0.851057	3.21279	-0.00406504
64400	1.628	0.3227	-0.0003		0.856317	3.22378	-0.00609756
64600	1.638	0.3236	-0.0002		0.861576	3.23277	-0.00406504
64800	1.646	0.3247	-0.0001		0.865784	3.24376	-0.00203252
65000	1.652	0.3256	-0.0001		0.86894	3.25275	-0.00203252
65200	1.662	0.3266	-0.0001		0.8742	3.26274	-0.00203252
65400	1.67	0.3276	-0.0001		0.878408	3.27273	-0.00203252
65600	1.676	0.3285	0		0.881564	3.28172	0
65800	1.69	0.3295	0.0001		0.888928	3.29171	0.00203252
66000	1.698	0.3306	0		0.893136	3.3027	0
66200	1.706	0.3314	0.0001		0.897344	3.31069	0.00203252
66400	1.716	0.3325	0.0001		0.902604	3.32168	0.00203252
66600	1.724	0.3334	0.0002		0.906812	3.33067	0.00406504
66800	1.734	0.3345	0.0003		0.912072	3.34166	0.00609756
67000	1.742	0.3355	0.0002		0.91628	3.35165	0.00406504
67200	1.752	0.3364	0.0003		0.92154	3.36064	0.00609756
67400	1.762	0.3375	0.0004		0.9268	3.37163	0.00813008
67600	1.772	0.3386	0.0004		0.932059	3.38262	0.00813008
67800	1.78	0.3395	0.0005		0.936267	3.39161	0.0101626
68000	1.79	0.3407	0.0005		0.941527	3.4036	0.0101626
68200	1.796	0.3417	0.0006		0.944683	3.41359	0.0121951
68400	1.808	0.3426	0.0007		0.950995	3.42258	0.0142276
68600	1.816	0.3435	0.0006		0.955203	3.43157	0.0121951
68800	1.826	0.3444	0.0007		0.960463	3.44056	0.0142276
69000	1.834	0.3453	0.0007		0.964671	3.44955	0.0142276
69200	1.848	0.3464	0.0008		0.972035	3.46054	0.0162602
69400	1.854	0.3474	0.0008		0.975191	3.47053	0.0162602
69600	1.864	0.3486	0.0007		0.980451	3.48252	0.0142276
69800	1.874	0.3496	0.0009		0.985711	3.49251	0.0182927
70000	1.884	0.3504	0.0009		0.990971	3.5005	0.0182927
70200	1.896	0.3515	0.0009		0.997283	3.51149	0.0182927
70400	1.904	0.3526	0.0011		1.00149	3.52248	0.0223577
70600	1.914	0.3536	0.001		1.00675	3.53247	0.0203252
70800	1.918	0.3546	0.0011		1.00885	3.54246	0.0223577
71000	1.928	0.3556	0.0012		1.01411	3.55245	0.0243902
71200	1.934	0.3565	0.0011		1.01727	3.56144	0.0223577
71400	1.946	0.3576	0.0012		1.02358	3.57243	0.0243902
71600	1.954	0.3585	0.0013		1.02779	3.58142	0.0264228
71800	1.966	0.3595	0.0014		1.0341	3.59141	0.0284553
72000	1.978	0.3604	0.0014		1.04041	3.6004	0.0284553
72200	1.988	0.3615	0.0015		1.04567	3.61139	0.0304878
72400	1.996	0.3626	0.0017		1.04988	3.62238	0.0345528
72600	2.01	0.3636	0.0016		1.05725	3.63237	0.0325203
72800	2.018	0.3645	0.0017		1.06145	3.64136	0.0345528
73000	2.028	0.3655	0.0017		1.06671	3.65135	0.0345528
73200	2.04	0.3666	0.0017		1.07303	3.66234	0.0345528
73400	2.05	0.3676	0.0018		1.07829	3.67233	0.0365854
73600	2.06	0.3687	0.0018		1.08355	3.68332	0.0365854
73800	2.066	0.3696	0.0019		1.0867	3.69231	0.0386179
74000	2.078	0.3707	0.002		1.09301	3.7033	0.0406504
74200	2.086	0.3716	0.002		1.09722	3.71229	0.0406504
74400	2.098	0.3726	0.002		1.10353	3.72228	0.0406504
74600	2.108	0.3734	0.0021		1.10879	3.73027	0.0426829
74800	2.118	0.3745	0.0021		1.11405	3.74126	0.0426829
75000	2.128	0.3754	0.0022		1.11931	3.75025	0.0447154
75200	2.136	0.3763	0.0023		1.12352	3.75924	0.046748
75400	2.138	0.377	0.0025		1.12457	3.76623	0.050813
75600	2.152	0.3778	0.0027		1.13194	3.77423	0.054878
75800	2.178	0.3796	0.0028		1.14561	3.79221	0.0569106
76000	2.188	0.3808	0.0029		1.15087	3.8042	0.0589431
76200	2.188	0.3814	0.0031		1.15087	3.81019	0.0630081
76400	2.194	0.3821	0.0031		1.15403	3.81718	0.0630081
76600	2.2	0.3827	0.0032		1.15718	3.82318	0.0650407
76800	2.228	0.3843	0.0032		1.17191	3.83916	0.0650407
77000	2.242	0.3856	0.0033		1.17928	3.85215	0.0670732
77200	2.244	0.3863	0.0035		1.18033	3.85914	0.0711382
77400	2.252	0.3871	0.0035		1.18454	3.86713	0.0711382
77600	2.268	0.3883	0.0035		1.19295	3.87912	0.0711382
77800	2.28	0.3893	0.0036		1.19926	3.88911	0.0731707
78000	2.29	0.3904	0.0036		1.20452	3.9001	0.0731707
78200	2.304	0.3914	0.0037		1.21189	3.91009	0.0752033
78400	2.314	0.3923	0.0038		1.21715	3.91908	0.0772358
78600	2.326	0.3934	0.0038		1.22346	3.93007	0.0772358
78800	2.338	0.3944	0.0038		1.22977	3.94006	0.0772358
79000	2.348	0.3954	0.0038		1.23503	3.95005	0.0772358
79200	2.36	0.3965	0.0039		1.24134	3.96104	0.0792683
79400	2.372	0.3976	0.0039		1.24766	3.97203	0.0792683
79600	2.38	0.3986	0.004		1.25186	3.98202	0.0813008
79800	2.394	0.3997	0.004		1.25923	3.99301	0.0813008
80000	2.4	0.4008	0.0042		1.26238	4.004	0.0853659
80200	2.412	0.4017	0.0044		1.26869	4.01299	0.0894309
80400	2.422	0.4027	0.0045		1.27395	4.02298	0.0914634
80600	2.434	0.4037	0.0045		1.28027	4.03297	0.0914634
80800	2.444	0.4046	0.0046		1.28553	4.04196	0.0934959
81000	2.456	0.4056	0.0047		1.29184	4.05195	0.0955285
81200	2.468	0.4066	0.0047		1.29815	4.06194	0.0955285
81400	2.478	0.4076	0.0048		1.30341	4.07193	0.097561
81600	2.488	0.4085	0.0048		1.30867	4.08092	0.097561
81800	2.498	0.4095	0.0049		1.31393	4.09091	0.0995935
82000	2.514	0.4105	0.005		1.32235	4.1009	0.101626
82200	2.526	0.4115	0.005		1.32866	4.11089	0.101626
82400	2.54	0.4126	0.0051		1.33602	4.12188	0.103659
82600	2.55	0.4136	0.0052		1.34128	4.13187	0.105691
82800	2.566	0.4147	0.0052		1.3497	4.14286	0.105691
83000	2.576	0.4156	0.0054		1.35496	4.15185	0.109756
83200	2.586	0.4167	0.0054		1.36022	4.16284	0.109756
83400	2.6	0.4177	0.0055		1.36758	4.17283	0.111789
83600	2.608	0.4186	0.0055		1.37179	4.18182	0.111789
83800	2.622	0.4195	0.0055		1.37915	4.19081	0.111789
84000	2.632	0.4206	0.0056		1.38441	4.2018	0.113821
84200	2.648	0.4216	0.0057		1.39283	4.21179	0.115854
84400	2.656	0.4226	0.0058		1.39704	4.22178	0.117886
84600	2.67	0.4235	0.0057		1.4044	4.23077	0.115854
84800	2.678	0.4246	0.0059		1.40861	4.24176	0.119919
85000	2.694	0.4256	0.006		1.41702	4.25175	0.121951
85200	2.706	0.4266	0.006		1.42334	4.26174	0.121951
85400	2.716	0.4275	0.0061		1.4286	4.27073	0.123984
85600	2.73	0.4286	0.0061		1.43596	4.28172	0.123984
85800	2.742	0.4296	0.0062		1.44227	4.29171	0.126016
86000	2.754	0.4306	0.0063		1.44858	4.3017	0.128049
86200	2.766	0.4315	0.0063		1.4549	4.31069	0.128049
86400	2.778	0.4326	0.0064		1.46121	4.32168	0.130081
86600	2.79	0.4335	0.0064		1.46752	4.33067	0.130081
86800	2.802	0.4345	0.0064		1.47383	4.34066	0.130081
87000	2.816	0.4356	0.0065		1.4812	4.35165	0.132114
87200	2.828	0.4365	0.0066		1.48751	4.36064	0.134146
87400	2.838	0.4375	0.0066		1.49277	4.37063	0.134146
87600	2.85	0.4385	0.0067		1.49908	4.38062	0.136179
87800	2.862	0.4395	0.0067		1.50539	4.39061	0.136179
88000	2.872	0.4405	0.0067		1.51065	4.4006	0.136179
88200	2.886	0.4415	0.0069		1.51802	4.41059	0.140244
88400	2.898	0.4425	0.0069		1.52433	4.42058	0.140244
88600	2.91	0.4434	0.0071		1.53064	4.42957	0.144309
88800	2.924	0.4445	0.0071		1.538	4.44056	0.144309
89000	2.936	0.4455	0.0072		1.54432	4.45055	0.146341
89200	2.948	0.4466	0.0073		1.55063	4.46154	0.148374
89400	2.958	0.4476	0.0073		1.55589	4.47153	0.148374
89600	2.968	0.4484	0.0073		1.56115	4.47952	0.148374
89800	2.982	0.4495	0.0075		1.56851	4.49051	0.152439
90000	2.996	0.4506	0.0075		1.57587	4.5015	0.152439
90200	3.008	0.4515	0.0075		1.58219	4.51049	0.152439
90400	3.024	0.4526	0.0076		1.5906	4.52148	0.154472
90600	3.036	0.4535	0.0076		1.59691	4.53047	0.154472
90800	3.048	0.4545	0.0078		1.60323	4.54046	0.158537
91000	3.06	0.4555	0.0078		1.60954	4.55045	0.158537
91200	3.074	0.4565	0.0079		1.6169	4.56044	0.160569
91400	3.086	0.4574	0.0079		1.62321	4.56943	0.160569
91600	3.102	0.4586	0.008		1.63163	4.58142	0.162602
91800	3.114	0.4595	0.008		1.63794	4.59041	0.162602
92000	3.124	0.4605	0.0081		1.6432	4.6004	0.164634
92200	3.144	0.4615	0.0081		1.65372	4.61039	0.164634
92400	3.156	0.4626	0.0082		1.66003	4.62138	0.166667
92600	3.168	0.4634	0.0081		1.66635	4.62937	0.164634
92800	3.186	0.4645	0.0083		1.67581	4.64036	0.168699
93000	3.2	0.4655	0.0084		1.68318	4.65035	0.170732
93200	3.212	0.4665	0.0084		1.68949	4.66034	0.170732
93400	3.222	0.4676	0.0085		1.69475	4.67133	0.172764
93600	3.238	0.4685	0.0086		1.70317	4.68032	0.174797
93800	3.25	0.4695	0.0086		1.70948	4.69031	0.174797
94000	3.264	0.4705	0.0087		1.71684	4.7003	0.176829
94200	3.276	0.4715	0.0088		1.72315	4.71029	0.178862
94400	3.294	0.4726	0.0089		1.73262	4.72128	0.180894
94600	3.306	0.4734	0.0089		1.73893	4.72927	0.180894
94800	3.32	0.4745	0.0089		1.7463	4.74026	0.180894
95000	3.336	0.4755	0.0089		1.75471	4.75025	0.180894
95200	3.346	0.4765	0.0089		1.75997	4.76024	0.180894
95400	3.36	0.4773	0.009		1.76734	4.76823	0.182927
95600	3.376	0.4785	0.0091		1.77575	4.78022	0.184959
95800	3.388	0.4795	0.0091		1.78206	4.79021	0.184959
96000	3.404	0.4805	0.0092		1.79048	4.8002	0.186992
96200	3.418	0.4814	0.0093		1.79784	4.80919	0.189024
96400	3.434	0.4825	0.0094		1.80626	4.82018	0.191057
96600	3.448	0.4834	0.0094		1.81362	4.82917	0.191057
96800	3.46	0.4844	0.0095		1.81994	4.83916	0.193089
97000	3.474	0.4855	0.0095		1.8273	4.85015	0.193089
97200	3.486	0.4865	0.0096		1.83361	4.86014	0.195122
97400	3.502	0.4875	0.0097		1.84203	4.87013	0.197154
97600	3.516	0.4885	0.0097		1.84939	4.88012	0.197154
97800	3.53	0.4895	0.0099		1.85676	4.89011	0.20122
98000	3.544	0.4904	0.0099		1.86412	4.8991	0.20122
98200	3.558	0.4915	0.0099		1.87148	4.91009	0.20122
98400	3.574	0.4925	0.01		1.8799	4.92008	0.203252
98600	3.586	0.4934	0.0101		1.88621	4.92907	0.205285
98800	3.6	0.4944	0.0101		1.89357	4.93906	0.205285
99000	3.616	0.4954	0.0103		1.90199	4.94905	0.20935
99200	3.63	0.4964	0.0103		1.90935	4.95904	0.20935
99400	3.646	0.4975	0.0103		1.91777	4.97003	0.20935
99600	3.66	0.4985	0.0103		1.92513	4.98002	0.20935
99800	3.678	0.4995	0.0104		1.9346	4.99001	0.211382
100000	3.694	0.5005	0.0104		1.94302	5	0.211382
100200	3.71	0.5014	0.0104		1.95143	5.00899	0.211382
100400	3.726	0.5025	0.0105		1.95985	5.01998	0.213415
100600	3.738	0.5034	0.0105		1.96616	5.02897	0.213415
100800	3.754	0.5044	0.0106		1.97458	5.03896	0.215447
101000	3.772	0.5055	0.0106		1.98405	5.04995	0.215447
101200	3.788	0.5066	0.0106		1.99246	5.06094	0.215447
101400	3.802	0.5075	0.0107		1.99983	5.06993	0.21748
101600	3.814	0.5084	0.0107		2.00614	5.07892	0.21748
101800	3.828	0.5094	0.0107		2.0135	5.08891	0.21748
102000	3.846	0.5105	0.0108		2.02297	5.0999	0.219512
102200	3.86	0.5115	0.0109		2.03033	5.10989	0.221545
102400	3.874	0.5124	0.0109		2.0377	5.11888	0.221545
102600	3.89	0.5134	0.0109		2.04611	5.12887	0.221545
102800	3.904	0.5145	0.0109		2.05348	5.13986	0.221545
103000	3.922	0.5154	0.011		2.06294	5.14885	0.223577
103200	3.932	0.5164	0.011		2.0682	5.15884	0.223577
103400	3.95	0.5174	0.0111		2.07767	5.16883	0.22561
103600	3.966	0.5185	0.0112		2.08609	5.17982	0.227642
103800	3.978	0.5195	0.0112		2.0924	5.18981	0.227642
104000	3.998	0.5204	0.0113		2.10292	5.1988	0.229675
104200	4.014	0.5214	0.0113		2.11134	5.20879	0.229675
104400	4.03	0.5224	0.0114		2.11975	5.21878	0.231707
104600	4.044	0.5234	0.0115		2.12712	5.22877	0.23374
104800	4.06	0.5243	0.0115		2.13553	5.23776	0.23374
105000	4.076	0.5254	0.0116		2.14395	5.24875	0.235772
105200	4.092	0.5263	0.0117		2.15236	5.25774	0.237805
105400	4.108	0.5274	0.0117		2.16078	5.26873	0.237805
105600	4.124	0.5284	0.0118		2.16919	5.27872	0.239837
105800	4.14	0.5294	0.0119		2.17761	5.28871	0.24187
106000	4.154	0.5304	0.0118		2.18497	5.2987	0.239837
106200	4.174	0.5314	0.0119		2.19549	5.30869	0.24187
106400	4.19	0.5324	0.0119		2.20391	5.31868	0.24187
106600	4.208	0.5335	0.0121		2.21338	5.32967	0.245935
106800	4.222	0.5344	0.012		2.22074	5.33866	0.243902
107000	4.234	0.5355	0.0121		2.22705	5.34965	0.245935
107200	4.248	0.5365	0.0121		2.23442	5.35964	0.245935
107400	4.264	0.5375	0.0121		2.24283	5.36963	0.245935
107600	4.278	0.5384	0.0122		2.2502	5.37862	0.247967
107800	4.292	0.5393	0.0122		2.25756	5.38761	0.247967
108000	4.308	0.5404	0.0123		2.26598	5.3986	0.25
108200	4.326	0.5414	0.0124		2.27545	5.40859	0.252033
108400	4.34	0.5424	0.0124		2.28281	5.41858	0.252033
108600	4.356	0.5434	0.0125		2.29123	5.42857	0.254065
108800	4.372	0.5443	0.0125		2.29964	5.43756	0.254065
109000	4.39	0.5453	0.0126		2.30911	5.44755	0.256098
109200	4.408	0.5463	0.0126		2.31858	5.45754	0.256098
109400	4.424	0.5474	0.0127		2.32699	5.46853	0.25813
109600	4.44	0.5482	0.0128		2.33541	5.47652	0.260163
109800	4.456	0.5493	0.0128		2.34382	5.48751	0.260163
110000	4.472	0.5503	0.0129		2.35224	5.4975	0.262195
110200	4.486	0.5513	0.013		2.3596	5.50749	0.264228
110400	4.506	0.5522	0.0131		2.37012	5.51648	0.26626
110600	4.52	0.5532	0.0132		2.37749	5.52647	0.268293
110800	4.538	0.5543	0.0132		2.38696	5.53746	0.268293
111000	4.554	0.5552	0.0133		2.39537	5.54645	0.270325
111200	4.57	0.5563	0.0133		2.40379	5.55744	0.270325
111400	4.586	0.5573	0.0133		2.4122	5.56743	0.270325
111600	4.602	0.5583	0.0134		2.42062	5.57742	0.272358
111800	4.62	0.5594	0.0135		2.43009	5.58841	0.27439
112000	4.638	0.5604	0.0134		2.43956	5.5984	0.272358
112200	4.654	0.5614	0.0135		2.44797	5.60839	0.27439
112400	4.674	0.5623	0.0137		2.45849	5.61738	0.278455
112600	4.69	0.5633	0.0137		2.46691	5.62737	0.278455
112800	4.71	0.5643	0.0137		2.47743	5.63736	0.278455
113000	4.726	0.5652	0.0137		2.48584	5.64635	0.278455
113200	4.742	0.5663	0.0138		2.49426	5.65734	0.280488
113400	4.76	0.5673	0.0138		2.50373	5.66733	0.280488
113600	4.782	0.5684	0.0139		2.5153	5.67832	0.28252
113800	4.796	0.5694	0.0139		2.52266	5.68831	0.28252
114000	4.816	0.5703	0.014		2.53318	5.6973	0.284553
114200	4.83	0.5713	0.014		2.54055	5.70729	0.284553
114400	4.848	0.5723	0.0141		2.55001	5.71728	0.286585
114600	4.866	0.5733	0.0141		2.55948	5.72727	0.286585
114800	4.882	0.5743	0.0141		2.5679	5.73726	0.286585
115000	4.898	0.5753	0.0141		2.57631	5.74725	0.286585
115200	4.914	0.5763	0.0142		2.58473	5.75724	0.288618
115400	4.934	0.5773	0.0142		2.59525	5.76723	0.288618
115600	4.95	0.5782	0.0142		2.60367	5.77622	0.288618
115800	4.968	0.5793	0.0143		2.61313	5.78721	0.29065
116000	4.986	0.5802	0.0143		2.6226	5.7962	0.29065
116200	5.004	0.5811	0.0144		2.63207	5.80519	0.292683
116400	5.024	0.5822	0.0145		2.64259	5.81618	0.294715
116600	5.04	0.5834	0.0145		2.651	5.82817	0.294715
116800	5.058	0.5842	0.0146		2.66047	5.83616	0.296748
117000	5.072	0.5853	0.0145		2.66784	5.84715	0.294715
117200	5.092	0.5864	0.0147		2.67836	5.85814	0.29878
117400	5.112	0.5873	0.0147		2.68888	5.86713	0.29878
117600	5.128	0.5882	0.0147		2.69729	5.87612	0.29878
117800	5.15	0.5892	0.0148		2.70886	5.88611	0.300813
118000	5.168	0.5902	0.0149		2.71833	5.8961	0.302846
118200	5.19	0.5913	0.0149		2.7299	5.90709	0.302846
118400	5.208	0.5922	0.0149		2.73937	5.91608	0.302846
118600	5.226	0.5933	0.015		2.74884	5.92707	0.304878
118800	5.242	0.5943	0.0151		2.75725	5.93706	0.306911
119000	5.262	0.5952	0.0151		2.76777	5.94605	0.306911
119200	5.284	0.5964	0.0152		2.77935	5.95804	0.308943
119400	5.304	0.5974	0.0152		2.78987	5.96803	0.308943
119600	5.324	0.5985	0.0153		2.80039	5.97902	0.310976
119800	5.342	0.5994	0.0153		2.80985	5.98801	0.310976
120000	5.362	0.6004	0.0154		2.82037	5.998	0.313008
120200	5.38	0.6015	0.0154		2.82984	6.00899	0.313008
120400	5.398	0.6024	0.0155		2.83931	6.01798	0.315041
120600	5.416	0.6035	0.0155		2.84878	6.02897	0.315041
120800	5.434	0.6044	0.0156		2.85825	6.03796	0.317073
121000	5.454	0.6054	0.0157		2.86877	6.04795	0.319106
121200	5.474	0.6065	0.0157		2.87929	6.05894	0.319106
121400	5.492	0.6075	0.0157		2.88875	6.06893	0.319106
121600	5.51	0.6085	0.0156		2.89822	6.07892	0.317073
121800	5.532	0.6096	0.0158		2.90979	6.08991	0.321138
122000	5.548	0.6105	0.0158		2.91821	6.0989	0.321138
122200	5.566	0.6114	0.0159		2.92768	6.10789	0.323171
122400	5.586	0.6125	0.0159		2.9382	6.11888	0.323171
122600	5.608	0.6134	0.0161		2.94977	6.12787	0.327236
122800	5.628	0.6144	0.0162		2.96029	6.13786	0.329268
123000	5.648	0.6154	0.0161		2.97081	6.14785	0.327236
123200	5.668	0.6164	0.0162		2.98133	6.15784	0.329268
123400	5.69	0.6174	0.0163		2.9929	6.16783	0.331301
123600	5.71	0.6184	0.0163		3.00342	6.17782	0.331301
123800	5.73	0.6193	0.0163		3.01394	6.18681	0.331301
124000	5.748	0.6205	0.0164		3.02341	6.1988	0.333333
124200	5.77	0.6214	0.0164		3.03498	6.20779	0.333333
124400	5.792	0.6225	0.0165		3.04655	6.21878	0.335366
124600	5.808	0.6236	0.0167		3.05497	6.22977	0.339431
124800	5.828	0.6244	0.0167		3.06549	6.23776	0.339431
125000	5.846	0.6255	0.0167		3.07495	6.24875	0.339431
125200	5.862	0.6266	0.0168		3.08337	6.25974	0.341463
125400	5.882	0.6275	0.0168		3.09389	6.26873	0.341463
125600	5.902	0.6285	0.0169		3.10441	6.27872	0.343496
125800	5.922	0.6294	0.017		3.11493	6.28771	0.345528
126000	5.942	0.6305	0.017		3.12545	6.2987	0.345528
126200	5.964	0.6314	0.017		3.13702	6.30769	0.345528
126400	5.986	0.6323	0.0171		3.14859	6.31668	0.347561
126600	6.002	0.6334	0.0172		3.15701	6.32767	0.349593
126800	6.022	0.6343	0.0171		3.16753	6.33666	0.347561
127000	6.042	0.6355	0.0171		3.17805	6.34865	0.347561
127200	6.066	0.6364	0.0172		3.19067	6.35764	0.349593
127400	6.086	0.6374	0.0172		3.20119	6.36763	0.349593
127600	6.11	0.6386	0.0173		3.21382	6.37962	0.351626
127800	6.132	0.6396	0.0173		3.22539	6.38961	0.351626
128000	6.15	0.6408	0.0174		3.23486	6.4016	0.353659
128200	6.172	0.6417	0.0175		3.24643	6.41059	0.355691
128400	6.196	0.6426	0.0175		3.25905	6.41958	0.355691
128600	6.212	0.6437	0.0176		3.26747	6.43057	0.357724
128800	6.238	0.6446	0.0177		3.28114	6.43956	0.359756
129000	6.256	0.6454	0.0178		3.29061	6.44755	0.361789
129200	6.28	0.6465	0.0178		3.30324	6.45854	0.361789
129400	6.302	0.6476	0.0178		3.31481	6.46953	0.361789
129600	6.318	0.6488	0.0179		3.32322	6.48152	0.363821
129800	6.34	0.6497	0.018		3.3348	6.49051	0.365854
130000	6.356	0.6506	0.0179		3.34321	6.4995	0.363821
130200	6.376	0.6516	0.018		3.35373	6.50949	0.365854
130400	6.398	0.6526	0.018		3.3653	6.51948	0.365854
130600	6.42	0.6535	0.0181		3.37687	6.52847	0.367886
130800	6.438	0.6545	0.0182		3.38634	6.53846	0.369919
131000	6.458	0.6555	0.0182		3.39686	6.54845	0.369919
131200	6.482	0.6565	0.0183		3.40949	6.55844	0.371951
131400	6.502	0.6576	0.0183		3.42001	6.56943	0.371951
131600	6.524	0.6585	0.0184		3.43158	6.57842	0.373984
131800	6.542	0.6594	0.0185		3.44105	6.58741	0.376016
132000	6.564	0.6605	0.0185		3.45262	6.5984	0.376016
132200	6.588	0.6614	0.0185		3.46524	6.60739	0.376016
132400	6.608	0.6624	0.0186		3.47576	6.61738	0.378049
132600	6.632	0.6636	0.0187		3.48839	6.62937	0.380081
132800	6.654	0.6645	0.0188		3.49996	6.63836	0.382114
133000	6.674	0.6655	0.0188		3.51048	6.64835	0.382114
133200	6.698	0.6665	0.0188		3.5231	6.65834	0.382114
133400	6.72	0.6675	0.0189		3.53467	6.66833	0.384146
133600	6.744	0.6685	0.019		3.5473	6.67832	0.386179
133800	6.762	0.6694	0.019		3.55676	6.68731	0.386179
134000	6.786	0.6705	0.0191		3.56939	6.6983	0.388211
134200	6.808	0.6716	0.0192		3.58096	6.70929	0.390244
134400	6.83	0.6724	0.0192		3.59253	6.71728	0.390244
134600	6.85	0.6734	0.0192		3.60305	6.72727	0.390244
134800	6.874	0.6744	0.0193		3.61568	6.73726	0.392276
135000	6.896	0.6754	0.0194		3.62725	6.74725	0.394309
135200	6.92	0.6764	0.0194		3.63987	6.75724	0.394309
135400	6.942	0.6775	0.0195		3.65144	6.76823	0.396341
135600	6.962	0.6784	0.0195		3.66196	6.77722	0.396341
135800	6.984	0.6794	0.0195		3.67353	6.78721	0.396341
136000	7.01	0.6805	0.0196		3.68721	6.7982	0.398374
136200	7.03	0.6813	0.0196		3.69773	6.80619	0.398374
136400	7.052	0.6823	0.0198		3.7093	6.81618	0.402439
136600	7.074	0.6834	0.0199		3.72087	6.82717	0.404472
136800	7.094	0.6844	0.0199		3.73139	6.83716	0.404472
137000	7.118	0.6853	0.0201		3.74402	6.84615	0.408537
137200	7.14	0.6864	0.02		3.75559	6.85714	0.406504
137400	7.16	0.6873	0.02		3.76611	6.86613	0.406504
137600	7.188	0.6883	0.0201		3.78084	6.87612	0.408537
137800	7.21	0.6894	0.0202		3.79241	6.88711	0.410569
138000	7.232	0.6903	0.0203		3.80398	6.8961	0.412602
138200	7.252	0.6914	0.0202		3.8145	6.90709	0.410569
138400	7.276	0.6923	0.0203		3.82712	6.91608	0.412602
138600	7.298	0.6933	0.0203		3.8387	6.92607	0.412602
138800	7.32	0.6944	0.0204		3.85027	6.93706	0.414634
139000	7.34	0.6952	0.0204		3.86079	6.94505	0.414634
139200	7.364	0.6962	0.0204		3.87341	6.95504	0.414634
139400	7.388	0.6973	0.0204		3.88604	6.96603	0.414634
139600	7.41	0.6983	0.0206		3.89761	6.97602	0.418699
139800	7.432	0.6993	0.0206		3.90918	6.98601	0.418699
140000	7.456	0.7004	0.0207		3.9218	6.997	0.420732
140200	7.476	0.7011	0.0207		3.93232	7.004	0.420732
140400	7.502	0.7022	0.0208		3.946	7.01499	0.422764
140600	7.528	0.7033	0.0208		3.95967	7.02597	0.422764
140800	7.55	0.7043	0.0208		3.97125	7.03596	0.422764
141000	7.572	0.7054	0.0209		3.98282	7.04695	0.424797
141200	7.596	0.7063	0.021		3.99544	7.05594	0.426829
141400	7.618	0.7073	0.021		4.00701	7.06593	0.426829
141600	7.642	0.7082	0.0211		4.01964	7.07493	0.428862
141800	7.664	0.7093	0.0212		4.03121	7.08591	0.430894
142000	7.69	0.7103	0.0212		4.04489	7.0959	0.430894
142200	7.714	0.7112	0.0213		4.05751	7.1049	0.432927
142400	7.738	0.7123	0.0214		4.07013	7.11588	0.434959
142600	7.764	0.7133	0.0214		4.08381	7.12587	0.434959
142800	7.786	0.7143	0.0215		4.09538	7.13586	0.436992
143000	7.81	0.7153	0.0216		4.108	7.14585	0.439024
143200	7.83	0.7163	0.0217		4.11852	7.15584	0.441057
143400	7.856	0.7173	0.0217		4.1322	7.16583	0.441057
143600	7.882	0.7183	0.0218		4.14588	7.17582	0.443089
143800	7.904	0.7193	0.0219		4.15745	7.18581	0.445122
144000	7.926	0.7201	0.022		4.16902	7.19381	0.447154
144200	7.95	0.7212	0.0221		4.18164	7.2048	0.449187
144400	7.976	0.7224	0.022		4.19532	7.21678	0.447154
144600	7.998	0.7233	0.0221		4.20689	7.22577	0.449187
144800	8.02	0.7244	0.0222		4.21846	7.23676	0.45122
145000	8.044	0.7254	0.0222		4.23109	7.24675	0.45122
145200	8.066	0.7263	0.0224		4.24266	7.25574	0.455285
145400	8.09	0.7272	0.0224		4.25528	7.26474	0.455285
145600	8.11	0.7283	0.0225		4.2658	7.27572	0.457317
145800	8.136	0.729	0.0227		4.27948	7.28272	0.461382
146000	8.158	0.7301	0.0227		4.29105	7.29371	0.461382
146200	8.182	0.7312	0.0228		4.30367	7.3047	0.463415
146400	8.21	0.7322	0.0227		4.3184	7.31469	0.461382
146600	8.236	0.7332	0.023		4.33208	7.32468	0.46748
146800	8.262	0.7341	0.0229		4.34575	7.33367	0.465447
147000	8.282	0.7352	0.0229		4.35627	7.34466	0.465447
147200	8.308	0.7362	0.023		4.36995	7.35465	0.46748
147400	8.332	0.7372	0.0231		4.38257	7.36464	0.469512
147600	8.358	0.7382	0.0232		4.39625	7.37463	0.471545
147800	8.382	0.7391	0.0232		4.40887	7.38362	0.471545
148000	8.406	0.74	0.0233		4.4215	7.39261	0.473577
148200	8.428	0.741	0.0234		4.43307	7.4026	0.47561
148400	8.452	0.7421	0.0234		4.44569	7.41359	0.47561
148600	8.48	0.7429	0.0235		4.46042	7.42158	0.477642
148800	8.506	0.744	0.0235		4.4741	7.43257	0.477642
149000	8.528	0.745	0.0235		4.48567	7.44256	0.477642
149200	8.554	0.7461	0.0235		4.49934	7.45355	0.477642
149400	8.578	0.7471	0.0235		4.51197	7.46354	0.477642
149600	8.598	0.748	0.0236		4.52249	7.47253	0.479675
149800	8.622	0.7491	0.0237		4.53511	7.48352	0.481707
150000	8.646	0.7501	0.0236		4.54773	7.49351	0.479675
150200	8.672	0.7511	0.0238		4.56141	7.5035	0.48374
150400	8.698	0.7521	0.0238		4.57509	7.51349	0.48374
150600	8.722	0.7531	0.024		4.58771	7.52348	0.487805
150800	8.75	0.7541	0.0239		4.60244	7.53347	0.485772
151000	8.786	0.7552	0.024		4.62137	7.54446	0.487805
151200	8.818	0.7564	0.0241		4.63821	7.55644	0.489837
151400	8.844	0.7574	0.0241		4.65188	7.56643	0.489837
151600	8.866	0.7586	0.0241		4.66345	7.57842	0.489837
151800	8.89	0.7595	0.0242		4.67608	7.58741	0.49187
152000	8.912	0.7605	0.0243		4.68765	7.5974	0.493902
152200	8.934	0.7615	0.0243		4.69922	7.60739	0.493902
152400	8.958	0.7625	0.0245		4.71184	7.61738	0.497967
152600	8.982	0.7634	0.0245		4.72447	7.62637	0.497967
152800	9.006	0.7643	0.0246		4.73709	7.63536	0.5
153000	9.03	0.7652	0.0246		4.74972	7.64436	0.5
153200	9.056	0.7663	0.0246		4.76339	7.65534	0.5
153400	9.078	0.7673	0.0247		4.77496	7.66533	0.502033
153600	9.106	0.7683	0.0248		4.78969	7.67532	0.504065
153800	9.13	0.7693	0.0249		4.80232	7.68531	0.506098
154000	9.154	0.7702	0.0249		4.81494	7.69431	0.506098
154200	9.182	0.7711	0.0249		4.82967	7.7033	0.506098
154400	9.206	0.7723	0.0251		4.84229	7.71528	0.510163
154600	9.234	0.7733	0.0251		4.85702	7.72527	0.510163
154800	9.26	0.7741	0.0251		4.87069	7.73327	0.510163
155000	9.284	0.7753	0.0253		4.88332	7.74525	0.514228
155200	9.306	0.7762	0.0252		4.89489	7.75425	0.512195
155400	9.332	0.7773	0.0253		4.90857	7.76523	0.514228
155600	9.36	0.7782	0.0254		4.92329	7.77423	0.51626
155800	9.386	0.7791	0.0254		4.93697	7.78322	0.51626
156000	9.41	0.7801	0.0255		4.94959	7.79321	0.518293
156200	9.436	0.7812	0.0256		4.96327	7.8042	0.520325
156400	9.462	0.7821	0.0256		4.97695	7.81319	0.520325
156600	9.488	0.7831	0.0257		4.99062	7.82318	0.522358
156800	9.518	0.7843	0.0258		5.0064	7.83516	0.52439
157000	9.54	0.7852	0.0258		5.01797	7.84416	0.52439
157200	9.564	0.7862	0.0259		5.0306	7.85415	0.526423
157400	9.596	0.7872	0.026		5.04743	7.86414	0.528455
157600	9.622	0.7882	0.026		5.0611	7.87413	0.528455
157800	9.644	0.7892	0.026		5.07268	7.88412	0.528455
158000	9.67	0.7902	0.026		5.08635	7.89411	0.528455
158200	9.7	0.7913	0.0262		5.10213	7.90509	0.53252
158400	9.724	0.7922	0.0263		5.11476	7.91409	0.534553
158600	9.75	0.7933	0.0263		5.12843	7.92507	0.534553
158800	9.78	0.794	0.0263		5.14421	7.93207	0.534553
159000	9.802	0.795	0.0264		5.15578	7.94206	0.536585
159200	9.83	0.7961	0.0265		5.17051	7.95305	0.538618
159400	9.854	0.7972	0.0265		5.18313	7.96404	0.538618
159600	9.882	0.7981	0.0265		5.19786	7.97303	0.538618
159800	9.906	0.7991	0.0266		5.21049	7.98302	0.54065
160000	9.934	0.8001	0.0266		5.22521	7.99301	0.54065
160200	9.96	0.8011	0.0267		5.23889	8.003	0.542683
160400	9.986	0.8021	0.0267		5.25257	8.01299	0.542683
160600	10.016	0.8029	0.0269		5.26835	8.02098	0.546748
160800	10.046	0.804	0.027		5.28413	8.03197	0.54878
161000	10.074	0.805	0.027		5.29885	8.04196	0.54878
161200	10.098	0.8061	0.0271		5.31148	8.05295	0.550813
161400	10.128	0.8071	0.0272		5.32726	8.06294	0.552846
161600	10.154	0.8081	0.0273		5.34093	8.07293	0.554878
161800	10.178	0.8092	0.0273		5.35356	8.08392	0.554878
162000	10.21	0.8101	0.0275		5.37039	8.09291	0.558943
162200	10.238	0.8112	0.0275		5.38512	8.1039	0.558943
162400	10.264	0.8122	0.0275		5.39879	8.11389	0.558943
162600	10.29	0.8132	0.0276		5.41247	8.12388	0.560976
162800	10.316	0.8142	0.0277		5.42614	8.13387	0.563008
163000	10.342	0.8152	0.0277		5.43982	8.14386	0.563008
163200	10.37	0.8161	0.0278		5.45455	8.15285	0.565041
163400	10.396	0.8171	0.0279		5.46822	8.16284	0.567073
163600	10.424	0.818	0.0279		5.48295	8.17183	0.567073
163800	10.448	0.819	0.028		5.49557	8.18182	0.569106
164000	10.476	0.82	0.028		5.5103	8.19181	0.569106
164200	10.498	0.8209	0.0281		5.52187	8.2008	0.571138
164400	10.528	0.822	0.0282		5.53765	8.21179	0.573171
164600	10.556	0.8228	0.0283		5.55238	8.21978	0.575203
164800	10.584	0.824	0.0283		5.56711	8.23177	0.575203
165000	10.61	0.8249	0.0285		5.58079	8.24076	0.579268
165200	10.638	0.826	0.0286		5.59551	8.25175	0.581301
165400	10.666	0.827	0.0286		5.61024	8.26174	0.581301
165600	10.694	0.828	0.0286		5.62497	8.27173	0.581301
165800	10.722	0.8289	0.0288		5.6397	8.28072	0.585366
166000	10.748	0.8299	0.0288		5.65337	8.29071	0.585366
166200	10.774	0.8309	0.0289		5.66705	8.3007	0.587398
166400	10.802	0.8318	0.0289		5.68178	8.30969	0.587398
166600	10.83	0.8328	0.029		5.6965	8.31968	0.589431
166800	10.858	0.8339	0.0291		5.71123	8.33067	0.591463
167000	10.884	0.8349	0.0292		5.72491	8.34066	0.593496
167200	10.912	0.8359	0.0292		5.73963	8.35065	0.593496
167400	10.942	0.8369	0.0293		5.75541	8.36064	0.595528
167600	10.968	0.8379	0.0294		5.76909	8.37063	0.597561
167800	10.996	0.839	0.0295		5.78382	8.38162	0.599593
168000	11.02	0.84	0.0295		5.79644	8.39161	0.599593
168200	11.046	0.841	0.0296		5.81012	8.4016	0.601626
168400	11.072	0.8419	0.0297		5.82379	8.41059	0.603659
168600	11.102	0.8429	0.0298		5.83957	8.42058	0.605691
168800	11.128	0.8439	0.0299		5.85325	8.43057	0.607724
169000	11.154	0.8449	0.0299		5.86693	8.44056	0.607724
169200	11.182	0.8459	0.03		5.88165	8.45055	0.609756
169400	11.21	0.8469	0.0299		5.89638	8.46054	0.607724
169600	11.238	0.848	0.03		5.91111	8.47153	0.609756
169800	11.268	0.8489	0.0301		5.92689	8.48052	0.611789
170000	11.298	0.8499	0.0302		5.94267	8.49051	0.613821
170200	11.324	0.851	0.0303		5.95634	8.5015	0.615854
170400	11.354	0.852	0.0304		5.97212	8.51149	0.617886
170600	11.386	0.853	0.0305		5.98896	8.52148	0.619919
170800	11.41	0.854	0.0306		6.00158	8.53147	0.621951
171000	11.438	0.8551	0.0306		6.01631	8.54246	0.621951
171200	11.466	0.856	0.0307		6.03104	8.55145	0.623984
171400	11.496	0.8571	0.0308		6.04681	8.56244	0.626016
171600	11.524	0.8582	0.0308		6.06154	8.57343	0.626016
171800	11.55	0.8591	0.031		6.07522	8.58242	0.630081
172000	11.58	0.8601	0.031		6.091	8.59241	0.630081
172200	11.606	0.8611	0.031		6.10467	8.6024	0.630081
172400	11.636	0.8621	0.0311		6.12045	8.61239	0.632114
172600	11.66	0.8631	0.0312		6.13308	8.62238	0.634146
172800	11.69	0.864	0.0313		6.14886	8.63137	0.636179
173000	11.714	0.865	0.0314		6.16148	8.64136	0.638211
173200	11.744	0.8659	0.0315		6.17726	8.65035	0.640244
173400	11.772	0.8669	0.0315		6.19199	8.66034	0.640244
173600	11.8	0.8679	0.0316		6.20672	8.67033	0.642276
173800	11.83	0.8689	0.0317		6.2225	8.68032	0.644309
174000	11.86	0.8699	0.0318		6.23828	8.69031	0.646341
174200	11.894	0.871	0.0319		6.25616	8.7013	0.648374
174400	11.926	0.8721	0.032		6.27299	8.71229	0.650407
174600	11.96	0.8732	0.0321		6.29088	8.72328	0.652439
174800	11.99	0.8742	0.0321		6.30666	8.73327	0.652439
175000	12.014	0.8753	0.0322		6.31928	8.74426	0.654472
175200	12.042	0.8762	0.0323		6.33401	8.75325	0.656504
175400	12.068	0.8771	0.0323		6.34768	8.76224	0.656504
175600	12.094	0.8782	0.0325		6.36136	8.77323	0.660569
175800	12.122	0.8792	0.0325		6.37609	8.78322	0.660569
176000	12.152	0.8802	0.0326		6.39187	8.79321	0.662602
176200	12.178	0.8812	0.0326		6.40554	8.8032	0.662602
176400	12.208	0.8822	0.0327		6.42132	8.81319	0.664634
176600	12.236	0.8832	0.0328		6.43605	8.82318	0.666667
176800	12.264	0.8842	0.0328		6.45078	8.83317	0.666667
177000	12.292	0.8851	0.033		6.46551	8.84216	0.670732
177200	12.322	0.8863	0.0331		6.48128	8.85415	0.672764
177400	12.35	0.8872	0.0331		6.49601	8.86314	0.672764
177600	12.378	0.888	0.0332		6.51074	8.87113	0.674797
177800	12.408	0.8892	0.0333		6.52652	8.88312	0.676829
178000	12.436	0.8901	0.0334		6.54125	8.89211	0.678862
178200	12.46	0.8909	0.0334		6.55387	8.9001	0.678862
178400	12.488	0.892	0.0335		6.5686	8.91109	0.680894
178600	12.516	0.893	0.0335		6.58333	8.92108	0.680894
178800	12.548	0.8939	0.0335		6.60016	8.93007	0.680894
179000	12.576	0.8952	0.0337		6.61489	8.94306	0.684959
179200	12.608	0.8962	0.0337		6.63172	8.95305	0.684959
179400	12.634	0.8971	0.0338		6.64539	8.96204	0.686992
179600	12.662	0.898	0.0338		6.66012	8.97103	0.686992
179800	12.694	0.899	0.0338		6.67695	8.98102	0.686992
180000	12.718	0.9	0.0339		6.68958	8.99101	0.689024
180200	12.75	0.9009	0.034		6.70641	9	0.691057
180400	12.778	0.902	0.0341		6.72114	9.01099	0.693089
180600	12.798	0.903	0.0341		6.73166	9.02098	0.693089
180800	12.826	0.9041	0.0342		6.74639	9.03197	0.695122
181000	12.848	0.9051	0.0344		6.75796	9.04196	0.699187
181200	12.882	0.9059	0.0344		6.77584	9.04995	0.699187
181400	12.91	0.907	0.0345		6.79057	9.06094	0.70122
181600	12.94	0.908	0.0346		6.80635	9.07093	0.703252
181800	12.966	0.9089	0.0347		6.82002	9.07992	0.705285
182000	13	0.91	0.0347		6.83791	9.09091	0.705285
182200	13.026	0.911	0.0349		6.85158	9.1009	0.70935
182400	13.058	0.9119	0.035		6.86842	9.10989	0.711382
182600	13.088	0.913	0.035		6.8842	9.12088	0.711382
182800	13.118	0.914	0.0351		6.89998	9.13087	0.713415
183000	13.146	0.9149	0.0352		6.9147	9.13986	0.715447
183200	13.176	0.9159	0.0353		6.93048	9.14985	0.71748
183400	13.21	0.917	0.0354		6.94837	9.16084	0.719512
183600	13.242	0.918	0.0354		6.9652	9.17083	0.719512
183800	13.268	0.919	0.0355		6.97887	9.18082	0.721545
184000	13.296	0.9199	0.0356		6.9936	9.18981	0.723577
184200	13.324	0.921	0.0357		7.00833	9.2008	0.72561
184400	13.354	0.9219	0.0357		7.02411	9.20979	0.72561
184600	13.382	0.923	0.0358		7.03884	9.22078	0.727642
184800	13.41	0.924	0.0358		7.05357	9.23077	0.727642
185000	13.442	0.925	0.0359		7.0704	9.24076	0.729675
185200	13.472	0.9259	0.036		7.08618	9.24975	0.731707
185400	13.502	0.9269	0.0361		7.10196	9.25974	0.73374
185600	13.53	0.928	0.0361		7.11668	9.27073	0.73374
185800	13.556	0.9289	0.0363		7.13036	9.27972	0.737805
186000	13.586	0.93	0.0363		7.14614	9.29071	0.737805
186200	13.616	0.9311	0.0363		7.16192	9.3017	0.737805
186400	13.642	0.932	0.0364		7.1756	9.31069	0.739837
186600	13.672	0.9329	0.0365		7.19138	9.31968	0.74187
186800	13.702	0.9339	0.0366		7.20716	9.32967	0.743902
187000	13.73	0.9349	0.0366		7.22188	9.33966	0.743902
187200	13.762	0.9358	0.0367		7.23871	9.34865	0.745935
187400	13.79	0.9369	0.0368		7.25344	9.35964	0.747967
187600	13.82	0.9379	0.0369		7.26922	9.36963	0.75
187800	13.85	0.9389	0.037		7.285	9.37962	0.752033
188000	13.88	0.9399	0.0371		7.30078	9.38961	0.754065
188200	13.906	0.941	0.0372		7.31446	9.4006	0.756098
188400	13.934	0.9419	0.0373		7.32919	9.40959	0.75813
188600	13.964	0.9429	0.0373		7.34497	9.41958	0.75813
188800	13.992	0.9439	0.0374		7.35969	9.42957	0.760163
189000	14.022	0.9449	0.0375		7.37547	9.43956	0.762195
189200	14.052	0.9459	0.0376		7.39125	9.44955	0.764228
189400	14.084	0.9469	0.0378		7.40808	9.45954	0.768293
189600	14.11	0.948	0.0378		7.42176	9.47053	0.768293
189800	14.138	0.9489	0.0379		7.43649	9.47952	0.770325
190000	14.17	0.9499	0.038		7.45332	9.48951	0.772358
190200	14.198	0.951	0.0381		7.46805	9.5005	0.77439
190400	14.224	0.952	0.0381		7.48172	9.51049	0.77439
190600	14.258	0.9529	0.0382		7.49961	9.51948	0.776423
190800	14.286	0.954	0.0383		7.51434	9.53047	0.778455
191000	14.316	0.9551	0.0384		7.53011	9.54146	0.780488
191200	14.342	0.956	0.0384		7.54379	9.55045	0.780488
191400	14.37	0.957	0.0386		7.55852	9.56044	0.784553
191600	14.4	0.9579	0.0387		7.5743	9.56943	0.786585
191800	14.43	0.959	0.0386		7.59008	9.58042	0.784553
192000	14.46	0.96	0.0388		7.60586	9.59041	0.788618
192200	14.486	0.9609	0.0389		7.61953	9.5994	0.79065
192400	14.51	0.9619	0.039		7.63216	9.60939	0.792683
192600	14.538	0.963	0.039		7.64689	9.62038	0.792683
192800	14.566	0.964	0.0391		7.66161	9.63037	0.794715
193000	14.596	0.9649	0.0391		7.67739	9.63936	0.794715
193200	14.624	0.9659	0.0392		7.69212	9.64935	0.796748
193400	14.654	0.9669	0.0393		7.7079	9.65934	0.79878
193600	14.68	0.9679	0.0394		7.72158	9.66933	0.800813
193800	14.708	0.969	0.0395		7.7363	9.68032	0.802846
194000	14.738	0.9699	0.0396		7.75208	9.68931	0.804878
194200	14.764	0.9709	0.0397		7.76576	9.6993	0.806911
194400	14.79	0.9719	0.0398		7.77944	9.70929	0.808943
194600	14.82	0.9728	0.0398		7.79522	9.71828	0.808943
194800	14.848	0.9739	0.0399		7.80994	9.72927	0.810976
195000	14.874	0.9748	0.04		7.82362	9.73826	0.813008
195200	14.902	0.9759	0.0402		7.83835	9.74925	0.817073
195400	14.93	0.9769	0.0402		7.85307	9.75924	0.817073
195600	14.958	0.9778	0.0403		7.8678	9.76823	0.819106
195800	14.986	0.9789	0.0404		7.88253	9.77922	0.821138
196000	15.014	0.9798	0.0405		7.89726	9.78821	0.823171
196200	15.042	0.9808	0.0405		7.91199	9.7982	0.823171
196400	15.074	0.9818	0.0406		7.92882	9.80819	0.825203
196600	15.098	0.9828	0.0407		7.94144	9.81818	0.827236
196800	15.128	0.9839	0.0407		7.95722	9.82917	0.827236
197000	15.154	0.9848	0.0408		7.9709	9.83816	0.829268
197200	15.182	0.9857	0.0409		7.98562	9.84715	0.831301
197400	15.214	0.9868	0.0409		8.00246	9.85814	0.831301
197600	15.242	0.9879	0.0411		8.01718	9.86913	0.835366
197800	15.266	0.9889	0.0411		8.02981	9.87912	0.835366
198000	15.296	0.9899	0.0412		8.04559	9.88911	0.837398
198200	15.32	0.9908	0.0413		8.05821	9.8981	0.839431
198400	15.35	0.9919	0.0414		8.07399	9.90909	0.841463
198600	15.374	0.9928	0.0415		8.08662	9.91808	0.843496
198800	15.402	0.9938	0.0415		8.10134	9.92807	0.843496
199000	15.428	0.9947	0.0417		8.11502	9.93706	0.847561
199200	15.452	0.9958	0.0418		8.12764	9.94805	0.849593
199400	15.476	0.9968	0.0419		8.14027	9.95804	0.851626
199600	15.504	0.9977	0.0419		8.15499	9.96703	0.851626
199800	15.53	0.9988	0.0421		8.16867	9.97802	0.855691
200000	15.556	0.9998	0.0422		8.18235	9.98801	0.857724
200200	15.584	1.0008	0.0423		8.19707	9.998	0.859756
200400	15.61	1.0019	0.0424		8.21075	10.009	0.861789
200600	15.64	1.0027	0.0426		8.22653	10.017	0.865854
200800	15.668	1.0038	0.0426		8.24126	10.028	0.865854
201000	15.696	1.0047	0.0428		8.25599	10.037	0.869919
201200	15.722	1.0057	0.0429		8.26966	10.047	0.871951
201400	15.746	1.0067	0.043		8.28228	10.0569	0.873984
201600	15.778	1.0079	0.0431		8.29912	10.0689	0.876016
201800	15.806	1.0087	0.0432		8.31384	10.0769	0.878049
202000	15.83	1.0097	0.0433		8.32647	10.0869	0.880081
202200	15.858	1.0107	0.0434		8.3412	10.0969	0.882114
202400	15.886	1.0118	0.0435		8.35592	10.1079	0.884146
202600	15.91	1.0127	0.0436		8.36855	10.1169	0.886179
202800	15.938	1.0138	0.0437		8.38328	10.1279	0.888211
203000	15.964	1.0149	0.0438		8.39695	10.1389	0.890244
203200	15.99	1.0159	0.0439		8.41063	10.1489	0.892276
203400	16.018	1.0167	0.044		8.42535	10.1568	0.894309
203600	16.046	1.0178	0.0441		8.44008	10.1678	0.896341
203800	16.072	1.0187	0.0442		8.45376	10.1768	0.898374
204000	16.102	1.0197	0.0443		8.46954	10.1868	0.900407
204200	16.128	1.0207	0.0444		8.48321	10.1968	0.902439
204400	16.154	1.0218	0.0446		8.49689	10.2078	0.906504
204600	16.186	1.0229	0.0447		8.51372	10.2188	0.908537
204800	16.208	1.0238	0.0448		8.52529	10.2278	0.910569
205000	16.236	1.0249	0.045		8.54002	10.2388	0.914634
205200	16.262	1.0256	0.0451		8.5537	10.2458	0.916667
205400	16.292	1.0267	0.0452		8.56948	10.2567	0.918699
205600	16.32	1.0278	0.0453		8.5842	10.2677	0.920732
205800	16.346	1.0288	0.0454		8.59788	10.2777	0.922764
206000	16.372	1.0298	0.0455		8.61156	10.2877	0.924797
206200	16.396	1.0307	0.0457		8.62418	10.2967	0.928862
206400	16.424	1.0318	0.0458		8.63891	10.3077	0.930894
206600	16.446	1.0328	0.0459		8.65048	10.3177	0.932927
206800	16.472	1.0337	0.046		8.66416	10.3267	0.934959
207000	16.5	1.0347	0.0461		8.67888	10.3367	0.936992
207200	16.526	1.0358	0.0463		8.69256	10.3477	0.941057
207400	16.552	1.0366	0.0464		8.70624	10.3556	0.943089
207600	16.578	1.0377	0.0465		8.71991	10.3666	0.945122
207800	16.604	1.0386	0.0467		8.73359	10.3756	0.949187
208000	16.628	1.0397	0.0467		8.74621	10.3866	0.949187
208200	16.654	1.0407	0.0469		8.75989	10.3966	0.953252
208400	16.68	1.0416	0.047		8.77356	10.4056	0.955285
208600	16.71	1.0427	0.0471		8.78934	10.4166	0.957317
208800	16.734	1.0439	0.0472		8.80197	10.4286	0.95935
209000	16.754	1.0449	0.0473		8.81249	10.4386	0.961382
209200	16.778	1.0458	0.0475		8.82511	10.4476	0.965447
209400	16.796	1.0469	0.0476		8.83458	10.4585	0.96748
209600	16.806	1.0479	0.0478		8.83984	10.4685	0.971545
209800	16.818	1.049	0.048		8.84615	10.4795	0.97561
210000	16.834	1.0499	0.0482		8.85457	10.4885	0.979675
210200	16.848	1.051	0.0484		8.86193	10.4995	0.98374
210400	16.862	1.0519	0.0485		8.86929	10.5085	0.985772
210600	16.878	1.0528	0.0486		8.87771	10.5175	0.987805
210800	16.9	1.0538	0.0488		8.88928	10.5275	0.99187
211000	16.914	1.0548	0.0488		8.89664	10.5375	0.99187
211200	16.928	1.0559	0.0491		8.90401	10.5485	0.997967
211400	16.938	1.0568	0.0492		8.90927	10.5574	1
211600	16.95	1.0578	0.0495		8.91558	10.5674	1.0061
211800	16.97	1.0589	0.0499		8.9261	10.5784	1.01423
212000	16.982	1.0599	0.0501		8.93241	10.5884	1.01829
212200	17.004	1.0608	0.0504		8.94398	10.5974	1.02439
212400	17.026	1.0617	0.0505		8.95556	10.6064	1.02642
212600	17.05	1.0628	0.0507		8.96818	10.6174	1.03049
212800	17.072	1.0638	0.051		8.97975	10.6274	1.03659
213000	17.098	1.0647	0.0513		8.99343	10.6364	1.04268
213200	17.122	1.0658	0.0514		9.00605	10.6474	1.04472
213400	17.142	1.0667	0.0516		9.01657	10.6563	1.04878
213600	17.17	1.0679	0.0518		9.0313	10.6683	1.05285
213800	17.196	1.0688	0.052		9.04497	10.6773	1.05691
214000	17.22	1.0698	0.0522		9.0576	10.6873	1.06098
214200	17.24	1.0708	0.0525		9.06812	10.6973	1.06707
214400	17.266	1.0718	0.0527		9.08179	10.7073	1.07114
214600	17.292	1.0727	0.0529		9.09547	10.7163	1.0752
214800	17.312	1.0738	0.0531		9.10599	10.7273	1.07927
215000	17.336	1.0748	0.0533		9.11861	10.7373	1.08333
215200	17.36	1.0757	0.0536		9.13124	10.7463	1.08943
215400	17.386	1.0768	0.0539		9.14491	10.7572	1.09553
215600	17.408	1.0777	0.054		9.15649	10.7662	1.09756
215800	17.432	1.0787	0.0542		9.16911	10.7762	1.10163
216000	17.458	1.0798	0.0546		9.18278	10.7872	1.10976
216200	17.482	1.0807	0.0548		9.19541	10.7962	1.11382
216400	17.506	1.0817	0.0549		9.20803	10.8062	1.11585
216600	17.528	1.0827	0.0551		9.2196	10.8162	1.11992
216800	17.552	1.0837	0.0554		9.23223	10.8262	1.12602
217000	17.578	1.0848	0.0556		9.2459	10.8372	1.13008
217200	17.6	1.0858	0.0558		9.25748	10.8472	1.13415
217400	17.624	1.0869	0.056		9.2701	10.8581	1.13821
217600	17.648	1.0877	0.0562		9.28272	10.8661	1.14228
217800	17.668	1.0888	0.0564		9.29324	10.8771	1.14634
218000	17.692	1.0899	0.0568		9.30587	10.8881	1.15447
218200	17.71	1.0909	0.057		9.31533	10.8981	1.15854
218400	17.73	1.0918	0.0573		9.32585	10.9071	1.16463
218600	17.752	1.0929	0.0575		9.33743	10.9181	1.1687
218800	17.766	1.0939	0.0578		9.34479	10.9281	1.1748
219000	17.784	1.095	0.0581		9.35426	10.9391	1.18089
219200	17.802	1.096	0.0584		9.36373	10.9491	1.18699
219400	17.806	1.097	0.059		9.36583	10.959	1.19919
219600	17.816	1.098	0.0595		9.37109	10.969	1.20935
219800	17.822	1.099	0.0601		9.37425	10.979	1.22154
220000	17.836	1.1	0.0606		9.38161	10.989	1.23171
220200	17.848	1.101	0.0611		9.38792	10.999	1.24187
220400	17.854	1.1021	0.0617		9.39108	11.01	1.25407
220600	17.864	1.1029	0.0623		9.39634	11.018	1.26626
220800	17.878	1.1041	0.0629		9.4037	11.03	1.27846
221000	17.894	1.105	0.0635		9.41212	11.039	1.29065
221200	17.908	1.106	0.0639		9.41948	11.049	1.29878
221400	17.924	1.1069	0.0644		9.4279	11.0579	1.30894
221600	17.946	1.1078	0.0649		9.43947	11.0669	1.31911
221800	17.96	1.1088	0.0652		9.44683	11.0769	1.3252
222000	17.978	1.1098	0.0656		9.4563	11.0869	1.33333
222200	18.002	1.1109	0.066		9.46892	11.0979	1.34146
222400	18.022	1.1118	0.0663		9.47944	11.1069	1.34756
222600	18.04	1.1128	0.0666		9.48891	11.1169	1.35366
222800	18.06	1.1138	0.067		9.49943	11.1269	1.36179
223000	18.078	1.1147	0.0674		9.5089	11.1359	1.36992
223200	18.098	1.1158	0.0678		9.51942	11.1469	1.37805
223400	18.12	1.117	0.0682		9.53099	11.1588	1.38618
223600	18.138	1.1178	0.0687		9.54046	11.1668	1.39634
223800	18.16	1.1188	0.069		9.55203	11.1768	1.40244
224000	18.138	1.1198	0.0694		9.54046	11.1868	1.41057
224200	18.146	1.1209	0.0701		9.54467	11.1978	1.4248
224400	18.164	1.122	0.0706		9.55414	11.2088	1.43496
224600	18.178	1.1229	0.0711		9.5615	11.2178	1.44512
224800	18.204	1.1238	0.0716		9.57518	11.2268	1.45528
225000	18.222	1.1249	0.0721		9.58464	11.2378	1.46545
225200	18.244	1.1258	0.0724		9.59622	11.2468	1.47154
225400	18.258	1.1267	0.0727		9.60358	11.2557	1.47764
225600	18.276	1.1279	0.0729		9.61305	11.2677	1.48171
225800	18.292	1.1289	0.0732		9.62146	11.2777	1.4878
226000	18.31	1.1298	0.0734		9.63093	11.2867	1.49187
226200	18.332	1.1308	0.0737		9.6425	11.2967	1.49797
226400	18.358	1.132	0.074		9.65618	11.3087	1.50407
226600	18.386	1.1332	0.0744		9.67091	11.3207	1.5122
226800	18.404	1.1341	0.0747		9.68037	11.3297	1.51829
227000	18.416	1.135	0.0751		9.68669	11.3387	1.52642
227200	18.424	1.1359	0.0756		9.69089	11.3477	1.53659
227400	18.436	1.1368	0.0764		9.69721	11.3566	1.55285
227600	18.446	1.1378	0.077		9.70247	11.3666	1.56504
227800	18.464	1.1388	0.0777		9.71193	11.3766	1.57927
228000	18.478	1.1398	0.0781		9.7193	11.3866	1.5874
228200	18.494	1.1408	0.0787		9.72771	11.3966	1.59959
228400	18.512	1.1418	0.0792		9.73718	11.4066	1.60976
228600	18.528	1.1429	0.0797		9.7456	11.4176	1.61992
228800	18.546	1.1439	0.0802		9.75507	11.4276	1.63008
229000	18.564	1.1448	0.0805		9.76453	11.4366	1.63618
229200	18.584	1.1458	0.0809		9.77505	11.4466	1.64431
229400	18.602	1.1467	0.0813		9.78452	11.4555	1.65244
229600	18.62	1.1478	0.0817		9.79399	11.4665	1.66057
229800	18.642	1.1487	0.082		9.80556	11.4755	1.66667
230000	18.656	1.1498	0.0824		9.81292	11.4865	1.6748
230200	18.676	1.1508	0.0827		9.82344	11.4965	1.68089
230400	18.698	1.1517	0.0831		9.83502	11.5055	1.68902
230600	18.714	1.1528	0.0834		9.84343	11.5165	1.69512
230800	18.736	1.1537	0.0837		9.855	11.5255	1.70122
231000	18.764	1.1546	0.0841		9.86973	11.5345	1.70935
231200	18.786	1.1558	0.0844		9.8813	11.5465	1.71545
231400	18.814	1.1568	0.0847		9.89603	11.5564	1.72154
231600	18.834	1.158	0.0849		9.90655	11.5684	1.72561
231800	18.858	1.159	0.0853		9.91917	11.5784	1.73374
232000	18.876	1.1599	0.0856		9.92864	11.5874	1.73984
232200	18.896	1.1611	0.0858		9.93916	11.5994	1.7439
232400	18.914	1.162	0.0861		9.94863	11.6084	1.75
232600	18.934	1.1629	0.0863		9.95915	11.6174	1.75407
232800	18.954	1.164	0.0867		9.96967	11.6284	1.7622
233000	18.974	1.1649	0.087		9.98019	11.6374	1.76829
233200	18.99	1.1659	0.0873		9.98861	11.6474	1.77439
233400	19.014	1.1669	0.0875		10.0012	11.6573	1.77846
233600	19.038	1.1679	0.0878		10.0139	11.6673	1.78455
233800	19.06	1.1689	0.0882		10.0254	11.6773	1.79268
234000	19.082	1.1699	0.0884		10.037	11.6873	1.79675
234200	19.106	1.171	0.0887		10.0496	11.6983	1.80285
234400	19.126	1.1719	0.089		10.0601	11.7073	1.80894
234600	19.15	1.1729	0.0892		10.0728	11.7173	1.81301
234800	19.174	1.174	0.0894		10.0854	11.7283	1.81707
235000	19.196	1.175	0.0898		10.097	11.7383	1.8252
235200	19.216	1.1759	0.0901		10.1075	11.7473	1.8313
235400	19.24	1.177	0.0903		10.1201	11.7582	1.83537
235600	19.26	1.178	0.0907		10.1306	11.7682	1.8435
235800	19.278	1.1789	0.091		10.1401	11.7772	1.84959
236000	19.296	1.18	0.0914		10.1496	11.7882	1.85772
236200	19.312	1.181	0.0918		10.158	11.7982	1.86585
236400	19.332	1.1819	0.0925		10.1685	11.8072	1.88008
236600	19.348	1.183	0.093		10.1769	11.8182	1.89024
236800	19.36	1.1839	0.0936		10.1832	11.8272	1.90244
237000	19.342	1.1851	0.0945		10.1738	11.8392	1.92073
237200	19.28	1.1862	0.0965		10.1411	11.8501	1.96138
237400	19.238	1.1872	0.0994		10.1191	11.8601	2.02033
237600	19.198	1.1886	0.1028		10.098	11.8741	2.08943
237800	19.082	1.1899	0.1101		10.037	11.8871	2.2378
238000	18.952	1.1907	0.1173		9.96862	11.8951	2.38415
238070	17.856	1.1942	0.1421		9.39213	11.9301	2.88821
238090	16.846	1.1953	0.1607		8.86088	11.9411	3.26626
238130	15.846	1.1882	0.1719		8.33488	11.8701	3.4939
238330	15.986	1.1881	0.1733		8.40852	11.8691	3.52236
238530	16.026	1.1912	0.1744		8.42956	11.9001	3.54472
238730	16.234	1.1948	0.1748		8.53897	11.9361	3.55285
238930	16.19	1.1954	0.1752		8.51583	11.9421	3.56098
239130	16.232	1.1959	0.1754		8.53792	11.9471	3.56504
239330	16.232	1.1964	0.1757		8.53792	11.952	3.57114
239530	16.276	1.1978	0.1759		8.56106	11.966	3.5752
239730	16.294	1.1986	0.1762		8.57053	11.974	3.5813
239930	16.318	1.1996	0.1765		8.58315	11.984	3.5874
240130	16.346	1.2008	0.1767		8.59788	11.996	3.59146
240330	16.366	1.2017	0.177		8.6084	12.005	3.59756
240530	16.386	1.2026	0.1773		8.61892	12.014	3.60366
240730	16.416	1.2037	0.1776		8.6347	12.025	3.60976
240930	16.436	1.2048	0.1779		8.64522	12.036	3.61585
241130	16.46	1.2058	0.1781		8.65784	12.046	3.61992
241330	16.484	1.2068	0.1784		8.67047	12.0559	3.62602
241530	16.272	1.2069	0.1771		8.55896	12.0569	3.59959
241730	16.378	1.2089	0.1772		8.61471	12.0769	3.60163
241930	16.404	1.2095	0.1773		8.62839	12.0829	3.60366
242130	16.418	1.2106	0.1775		8.63575	12.0939	3.60772
242330	16.478	1.2117	0.1776		8.66731	12.1049	3.60976
242530	16.48	1.2127	0.1778		8.66836	12.1149	3.61382
242730	16.528	1.2137	0.178		8.69361	12.1249	3.61789
242930	16.552	1.2148	0.1781		8.70624	12.1359	3.61992
243130	16.574	1.2156	0.1783		8.71781	12.1439	3.62398
243330	16.614	1.2169	0.1785		8.73885	12.1568	3.62805
243530	16.638	1.2179	0.1786		8.75147	12.1668	3.63008
243730	16.662	1.2188	0.1789		8.76409	12.1758	3.63618
243930	16.696	1.2197	0.1791		8.78198	12.1848	3.64024
244130	16.722	1.2208	0.1793		8.79565	12.1958	3.64431
244330	16.75	1.2218	0.1795		8.81038	12.2058	3.64837
244530	16.776	1.2228	0.1796		8.82406	12.2158	3.65041
244730	16.804	1.2238	0.1798		8.83879	12.2258	3.65447
244930	16.826	1.2247	0.1801		8.85036	12.2348	3.66057
245130	16.85	1.2258	0.1803		8.86298	12.2458	3.66463
245330	16.876	1.2266	0.1806		8.87666	12.2537	3.67073
245530	16.912	1.2278	0.1808		8.89559	12.2657	3.6748
245730	16.942	1.2288	0.181		8.91137	12.2757	3.67886
245930	16.964	1.2299	0.1813		8.92294	12.2867	3.68496
246130	16.978	1.2307	0.1815		8.93031	12.2947	3.68902
246330	17.004	1.2316	0.1818		8.94398	12.3037	3.69512
246530	17.034	1.2328	0.182		8.95976	12.3157	3.69919
246730	17.058	1.2337	0.1823		8.97239	12.3247	3.70528
246930	17.084	1.2348	0.1826		8.98606	12.3357	3.71138
247130	17.106	1.2358	0.1828		8.99764	12.3457	3.71545
247330	17.13	1.2367	0.183		9.01026	12.3546	3.71951
247530	17.154	1.2378	0.1833		9.02288	12.3656	3.72561
247730	17.174	1.2388	0.1836		9.0334	12.3756	3.73171
247930	17.202	1.2396	0.1838		9.04813	12.3836	3.73577
248130	17.222	1.2408	0.1841		9.05865	12.3956	3.74187
248330	17.244	1.2417	0.1844		9.07022	12.4046	3.74797
248530	17.27	1.2427	0.1846		9.0839	12.4146	3.75203
248730	17.292	1.2437	0.1848		9.09547	12.4246	3.7561
248930	17.312	1.2448	0.185		9.10599	12.4356	3.76016
249130	17.336	1.2457	0.1854		9.11861	12.4446	3.76829
249330	17.36	1.2467	0.1857		9.13124	12.4545	3.77439
249530	17.38	1.2478	0.1859		9.14176	12.4655	3.77846
249730	17.398	1.2488	0.1862		9.15123	12.4755	3.78455
249930	17.418	1.2497	0.1865		9.16174	12.4845	3.79065
250130	17.438	1.2507	0.1868		9.17226	12.4945	3.79675
250330	17.458	1.2519	0.1872		9.18278	12.5065	3.80488
250530	17.472	1.2527	0.1877		9.19015	12.5145	3.81504
250730	17.49	1.2537	0.1881		9.19962	12.5245	3.82317
250930	17.512	1.2547	0.1886		9.21119	12.5345	3.83333
251130	17.534	1.2558	0.189		9.22276	12.5455	3.84146
251330	17.554	1.2568	0.1893		9.23328	12.5554	3.84756
251530	17.57	1.2578	0.1899		9.2417	12.5654	3.85976
251730	17.588	1.2588	0.1905		9.25116	12.5754	3.87195
251930	17.604	1.2598	0.1908		9.25958	12.5854	3.87805
252130	17.612	1.2608	0.1912		9.26379	12.5954	3.88618
252330	17.626	1.2616	0.1916		9.27115	12.6034	3.89431
252530	17.64	1.2626	0.192		9.27852	12.6134	3.90244
252730	17.66	1.2636	0.1923		9.28904	12.6234	3.90854
252930	17.68	1.2647	0.1928		9.29956	12.6344	3.9187
253130	17.706	1.2657	0.1932		9.31323	12.6444	3.92683
253330	17.73	1.2667	0.1935		9.32585	12.6543	3.93293
253530	17.748	1.2677	0.1938		9.33532	12.6643	3.93902
253730	17.766	1.2687	0.1942		9.34479	12.6743	3.94715
253930	17.78	1.2696	0.1945		9.35215	12.6833	3.95325
254130	17.802	1.2706	0.1948		9.36373	12.6933	3.95935
254330	17.822	1.2717	0.1951		9.37425	12.7043	3.96545
254530	17.814	1.2726	0.1954		9.37004	12.7133	3.97154
254730	17.824	1.2737	0.1963		9.3753	12.7243	3.98984
254930	17.826	1.2747	0.1974		9.37635	12.7343	4.0122
255130	17.824	1.2758	0.1983		9.3753	12.7453	4.03049
255330	17.828	1.2768	0.1992		9.3774	12.7552	4.04878
255530	17.834	1.2776	0.1998		9.38056	12.7632	4.06098
255730	17.844	1.2787	0.2004		9.38582	12.7742	4.07317
255930	17.858	1.2796	0.2008		9.39318	12.7832	4.0813
256130	17.878	1.2806	0.2013		9.4037	12.7932	4.09146
256330	17.898	1.2817	0.2016		9.41422	12.8042	4.09756
256530	17.912	1.2826	0.202		9.42159	12.8132	4.10569
256730	17.93	1.2836	0.2024		9.43105	12.8232	4.11382
256930	17.952	1.2847	0.2028		9.44263	12.8342	4.12195
257130	17.972	1.2856	0.2032		9.45315	12.8432	4.13008
257330	17.99	1.2867	0.2035		9.46261	12.8541	4.13618
257530	18.014	1.2878	0.2039		9.47524	12.8651	4.14431
257730	18.034	1.2886	0.2043		9.48576	12.8731	4.15244
257930	18.05	1.2896	0.2045		9.49417	12.8831	4.1565
258130	18.072	1.2907	0.205		9.50574	12.8941	4.16667
258330	18.09	1.2917	0.2054		9.51521	12.9041	4.1748
258530	18.11	1.2927	0.2059		9.52573	12.9141	4.18496
258730	18.134	1.2938	0.2063		9.53836	12.9251	4.19309
258930	18.158	1.2949	0.2066		9.55098	12.9361	4.19919
259130	18.178	1.2959	0.2072		9.5615	12.9461	4.21138
259330	18.196	1.2971	0.2076		9.57097	12.958	4.21951
259530	18.206	1.2978	0.2081		9.57623	12.965	4.22967
259730	18.22	1.2988	0.2084		9.58359	12.975	4.23577
259930	18.228	1.2996	0.2088		9.5878	12.983	4.2439
260130	18.244	1.3006	0.2093		9.59622	12.993	4.25407
260330	18.262	1.3016	0.2097		9.60568	13.003	4.2622
260530	18.28	1.3026	0.2101		9.61515	13.013	4.27033
260730	18.3	1.3036	0.2105		9.62567	13.023	4.27846
260930	18.318	1.3046	0.2109		9.63514	13.033	4.28659
261130	18.338	1.3056	0.2113		9.64566	13.043	4.29472
261330	18.36	1.3066	0.2117		9.65723	13.0529	4.30285
261530	18.376	1.3077	0.2121		9.66565	13.0639	4.31098
261730	18.38	1.3086	0.2129		9.66775	13.0729	4.32724
261930	18.392	1.3097	0.2135		9.67406	13.0839	4.33943
262130	18.404	1.3106	0.2142		9.68037	13.0929	4.35366
262330	18.416	1.3117	0.2147		9.68669	13.1039	4.36382
262530	18.428	1.3126	0.2152		9.693	13.1129	4.37398
262730	18.444	1.3136	0.2157		9.70141	13.1229	4.38415
262930	18.46	1.3145	0.2161		9.70983	13.1319	4.39228
263130	18.474	1.3155	0.2166		9.71719	13.1419	4.40244
263330	18.492	1.3166	0.2171		9.72666	13.1528	4.4126
263530	18.508	1.3176	0.2176		9.73508	13.1628	4.42276
263730	18.522	1.3186	0.218		9.74244	13.1728	4.43089
263930	18.542	1.3196	0.2186		9.75296	13.1828	4.44309
264130	18.554	1.3207	0.219		9.75927	13.1938	4.45122
264330	18.566	1.3216	0.2194		9.76558	13.2028	4.45935
264530	18.576	1.3227	0.2198		9.77084	13.2138	4.46748
264730	18.586	1.3236	0.2203		9.7761	13.2228	4.47764
264930	18.596	1.3246	0.2209		9.78136	13.2328	4.48984
265130	18.614	1.3256	0.2213		9.79083	13.2428	4.49797
265330	18.634	1.3267	0.2216		9.80135	13.2537	4.50407
265530	18.648	1.3276	0.2221		9.80872	13.2627	4.51423
265730	18.662	1.3288	0.2226		9.81608	13.2747	4.52439
265930	18.678	1.3296	0.2229		9.8245	13.2827	4.53049
266130	18.694	1.3305	0.2234		9.83291	13.2917	4.54065
266330	18.71	1.3314	0.2238		9.84133	13.3007	4.54878
266530	18.728	1.3325	0.2242		9.8508	13.3117	4.55691
266730	18.746	1.3334	0.2246		9.86026	13.3207	4.56504
266930	18.768	1.3345	0.2252		9.87184	13.3317	4.57724
267130	18.786	1.3355	0.2256		9.8813	13.3417	4.58537
267330	18.806	1.3365	0.2262		9.89182	13.3516	4.59756
267530	18.822	1.3375	0.2267		9.90024	13.3616	4.60772
267730	18.838	1.3385	0.2272		9.90865	13.3716	4.61789
267930	18.854	1.3396	0.2277		9.91707	13.3826	4.62805
268130	18.862	1.3405	0.2281		9.92128	13.3916	4.63618
268330	18.874	1.3415	0.2286		9.92759	13.4016	4.64634
268530	18.712	1.3454	0.2299		9.84238	13.4406	4.67276
268730	18.58	1.3429	0.2312		9.77295	13.4156	4.69919
268930	18.592	1.3455	0.2315		9.77926	13.4416	4.70528
269130	18.596	1.3462	0.2316		9.78136	13.4486	4.70732
269330	18.63	1.347	0.2319		9.79925	13.4565	4.71341
269530	18.6	1.3473	0.2321		9.78347	13.4595	4.71748
269730	18.646	1.3487	0.2324		9.80766	13.4735	4.72358
269930	18.654	1.3494	0.2326		9.81187	13.4805	4.72764
270130	18.678	1.3506	0.2329		9.8245	13.4925	4.73374
270330	18.698	1.3516	0.2331		9.83502	13.5025	4.7378
270530	18.722	1.3525	0.2334		9.84764	13.5115	4.7439
270730	18.742	1.3535	0.2337		9.85816	13.5215	4.75
270930	18.762	1.3543	0.2341		9.86868	13.5295	4.75813
271130	18.79	1.3556	0.2345		9.88341	13.5425	4.76626
271330	18.808	1.3566	0.2348		9.89288	13.5524	4.77236
271530	18.826	1.3576	0.2352		9.90234	13.5624	4.78049
271730	18.842	1.3584	0.2356		9.91076	13.5704	4.78862
271930	18.866	1.3595	0.236		9.92338	13.5814	4.79675
272130	18.886	1.3607	0.2364		9.9339	13.5934	4.80488
272330	18.902	1.3616	0.2368		9.94232	13.6024	4.81301
272530	18.918	1.3624	0.2373		9.95073	13.6104	4.82317
272730	18.934	1.3636	0.2377		9.95915	13.6224	4.8313
272930	18.942	1.3646	0.2382		9.96336	13.6324	4.84146
273130	18.958	1.3654	0.2387		9.97177	13.6404	4.85163
273330	18.978	1.3664	0.2391		9.98229	13.6503	4.85976
273530	18.986	1.3676	0.2396		9.9865	13.6623	4.86992
273730	18.914	1.3684	0.2408		9.94863	13.6703	4.89431
273930	18.888	1.3696	0.2429		9.93495	13.6823	4.93699
274130	18.882	1.3705	0.2443		9.9318	13.6913	4.96545
274330	18.868	1.3716	0.2453		9.92443	13.7023	4.98577
274530	18.866	1.3727	0.2461		9.92338	13.7133	5.00203
274730	18.842	1.3736	0.2467		9.91076	13.7223	5.01423
274930	18.808	1.3747	0.248		9.89288	13.7333	5.04065
275130	18.772	1.3758	0.2492		9.87394	13.7443	5.06504
275330	18.736	1.3768	0.2503		9.855	13.7542	5.0874
275530	18.71	1.3776	0.2512		9.84133	13.7622	5.10569
275730	18.646	1.3783	0.2523		9.80766	13.7692	5.12805
275930	18.558	1.3793	0.2541		9.76138	13.7792	5.16463
276130	18.502	1.3805	0.2559		9.73192	13.7912	5.20122
276330	18.364	1.3815	0.2577		9.65933	13.8012	5.2378
276528	17.362	1.3828	0.2745		9.13229	13.8142	5.57927
276728	17.094	1.3839	0.283		8.99132	13.8252	5.75203
276928	17.016	1.3839	0.2861		8.9503	13.8252	5.81504
277129	17.032	1.3858	0.2887		8.95871	13.8442	5.86789
277330	16.572	1.3861	0.2974		8.71675	13.8472	6.04472
277428	15.428	1.388	0.326		8.11502	13.8661	6.62602
277629	14.904	1.3924	0.3577		7.8394	13.9101	7.27033
277830	14.726	1.3914	0.3643		7.74577	13.9001	7.40447
278030	14.758	1.3917	0.3688		7.7626	13.9031	7.49593
278230	14.574	1.3903	0.3712		7.66582	13.8891	7.54472
278430	14.594	1.3919	0.3736		7.67634	13.9051	7.5935
278630	14.63	1.3934	0.3753		7.69528	13.9201	7.62805
278830	14.588	1.3936	0.3771		7.67318	13.9221	7.66463
279012	13.35	1.4001	0.3838		7.02201	13.987	7.80081
279036	12.272	1.4001	0.3838		6.45499	13.987	7.80081
279236	11.856	1.4001	0.3838		6.23617	13.987	7.80081
279436	12.204	1.3982	0.4569		6.41922	13.968	9.28659
279636	12.136	1.3983	0.4578		6.38345	13.969	9.30488
279837	12.036	1.3984	0.4586		6.33085	13.97	9.32114
280038	12.094	1.3997	0.4592		6.36136	13.983	9.33333
280238	12.174	1.4012	0.4601		6.40344	13.998	9.35163
280438	12.214	1.4023	0.461		6.42448	14.009	9.36992
280638	12.21	1.403	0.463		6.42237	14.016	9.41057
280838	12.244	1.404	0.464		6.44026	14.026	9.43089
281038	12.278	1.4052	0.4647		6.45814	14.038	9.44512
281238	12.286	1.4065	0.4655		6.46235	14.0509	9.46138
281438	12.29	1.4069	0.4666		6.46445	14.0549	9.48374
281638	12.322	1.4082	0.4676		6.48128	14.0679	9.50407
281838	12.34	1.4091	0.4683		6.49075	14.0769	9.51829
282038	12.372	1.4102	0.4691		6.50758	14.0879	9.53455
282238	12.39	1.411	0.4703		6.51705	14.0959	9.55894
282438	12.412	1.4119	0.4712		6.52862	14.1049	9.57724
282638	12.442	1.413	0.4721		6.5444	14.1159	9.59553
282838	12.466	1.4142	0.4731		6.55703	14.1279	9.61585
283038	12.484	1.4151	0.4743		6.5665	14.1369	9.64024
283238	12.496	1.416	0.4753		6.57281	14.1459	9.66057
283438	12.528	1.4171	0.4765		6.58964	14.1568	9.68496
283638	12.53	1.4184	0.4797		6.59069	14.1698	9.75
283838	12.52	1.4188	0.4822		6.58543	14.1738	9.80081
284038	12.544	1.4201	0.4845		6.59806	14.1868	9.84756
284238	12.544	1.4213	0.4885		6.59806	14.1988	9.92886
284438	12.538	1.4221	0.4927		6.5949	14.2068	10.0142
284638	12.554	1.423	0.4953		6.60332	14.2158	10.0671
284838	12.568	1.424	0.4973		6.61068	14.2258	10.1077
285038	12.59	1.4249	0.4989		6.62225	14.2348	10.1402
285238	12.61	1.4262	0.5005		6.63277	14.2478	10.1728
285438	12.622	1.4269	0.5021		6.63908	14.2547	10.2053
285638	12.65	1.4282	0.5036		6.65381	14.2677	10.2358
285838	12.658	1.429	0.5049		6.65802	14.2757	10.2622
286038	12.676	1.4299	0.506		6.66749	14.2847	10.2846
286238	12.702	1.431	0.5073		6.68116	14.2957	10.311
286438	12.716	1.432	0.5086		6.68853	14.3057	10.3374
286638	12.734	1.4332	0.5098		6.69799	14.3177	10.3618
286838	12.744	1.434	0.5111		6.70325	14.3257	10.3882
287038	12.748	1.4351	0.5128		6.70536	14.3367	10.4228
287238	12.76	1.436	0.5144		6.71167	14.3457	10.4553
287438	12.77	1.437	0.5156		6.71693	14.3556	10.4797
287638	12.78	1.438	0.5171		6.72219	14.3656	10.5102
287838	12.794	1.439	0.5185		6.72955	14.3756	10.5386
288038	12.824	1.4404	0.5199		6.74533	14.3896	10.5671
288238	12.826	1.4412	0.5213		6.74639	14.3976	10.5955
288438	12.826	1.442	0.5228		6.74639	14.4056	10.626
288638	12.842	1.443	0.5241		6.7548	14.4156	10.6524
288838	12.858	1.4441	0.5255		6.76322	14.4266	10.6809
289038	12.878	1.445	0.5267		6.77374	14.4356	10.7053
289238	12.894	1.4461	0.5279		6.78215	14.4466	10.7297
289438	12.914	1.4473	0.5291		6.79267	14.4585	10.7541
289638	12.922	1.4481	0.5303		6.79688	14.4665	10.7785
289838	12.946	1.4494	0.5317		6.8095	14.4795	10.8069
290038	12.958	1.4503	0.533		6.81582	14.4885	10.8333
290238	12.972	1.4512	0.5343		6.82318	14.4975	10.8598
290438	12.986	1.4523	0.5356		6.83054	14.5085	10.8862
290638	12.996	1.4531	0.5369		6.8358	14.5165	10.9126
290838	13.002	1.454	0.5381		6.83896	14.5255	10.937
291038	13.02	1.4548	0.539		6.84843	14.5335	10.9553
291238	13.038	1.456	0.5401		6.8579	14.5455	10.9776
291438	13.052	1.457	0.5412		6.86526	14.5554	11
291638	13.07	1.458	0.5422		6.87473	14.5654	11.0203
291838	13.084	1.459	0.5434		6.88209	14.5754	11.0447
292038	13.102	1.46	0.5444		6.89156	14.5854	11.065
292238	13.114	1.461	0.546		6.89787	14.5954	11.0976
292438	13.132	1.4619	0.5476		6.90734	14.6044	11.1301
292638	13.15	1.4631	0.549		6.91681	14.6164	11.1585
292838	13.164	1.4641	0.5504		6.92417	14.6264	11.187
293038	13.178	1.4651	0.5519		6.93153	14.6364	11.2175
293238	13.192	1.4661	0.5533		6.9389	14.6464	11.2459
293438	13.2	1.4672	0.5548		6.94311	14.6573	11.2764
293638	13.206	1.4681	0.5568		6.94626	14.6663	11.3171
293838	13.22	1.469	0.5582		6.95363	14.6753	11.3455
294038	13.226	1.47	0.5595		6.95678	14.6853	11.372
294238	13.24	1.471	0.5608		6.96415	14.6953	11.3984
294438	13.246	1.4719	0.5626		6.9673	14.7043	11.435
294638	13.26	1.4731	0.5647		6.97467	14.7163	11.4776
294838	13.26	1.4741	0.5689		6.97467	14.7263	11.563
295038	13.252	1.475	0.5718		6.97046	14.7353	11.622
295238	13.262	1.4758	0.5732		6.97572	14.7433	11.6504
295438	13.274	1.4769	0.5742		6.98203	14.7542	11.6707
295638	13.29	1.4779	0.5751		6.99045	14.7642	11.689
295838	13.308	1.479	0.576		6.99991	14.7752	11.7073
296038	13.316	1.4801	0.577		7.00412	14.7862	11.7276
296238	13.326	1.4811	0.578		7.00938	14.7962	11.748
296438	13.336	1.4821	0.579		7.01464	14.8062	11.7683
296638	13.346	1.4829	0.5801		7.0199	14.8142	11.7907
296838	13.356	1.4839	0.5814		7.02516	14.8242	11.8171
297038	13.358	1.485	0.5826		7.02621	14.8352	11.8415
297238	13.362	1.4859	0.5841		7.02832	14.8442	11.872
297438	13.37	1.4869	0.5856		7.03253	14.8541	11.9024
297638	13.378	1.4881	0.5872		7.03673	14.8661	11.935
297838	13.382	1.489	0.5894		7.03884	14.8751	11.9797
298038	13.296	1.4909	0.5922		6.9936	14.8941	12.0366
298238	13.24	1.4905	0.5936		6.96415	14.8901	12.065
298438	13.256	1.4922	0.595		6.97256	14.9071	12.0935
298638	13.24	1.4926	0.5959		6.96415	14.9111	12.1118
298838	13.262	1.4942	0.597		6.97572	14.9271	12.1341
299038	13.254	1.4949	0.5981		6.97151	14.9341	12.1565
299238	13.258	1.4961	0.5994		6.97361	14.9461	12.1829
299438	13.248	1.497	0.6011		6.96835	14.955	12.2175
299638	13.242	1.4978	0.6027		6.9652	14.963	12.25
299838	13.248	1.4989	0.6043		6.96835	14.974	12.2825
300038	13.256	1.4998	0.6056		6.97256	14.983	12.3089
300238	13.26	1.501	0.6068		6.97467	14.995	12.3333
300438	13.264	1.5019	0.608		6.97677	15.004	12.3577
300638	13.272	1.5029	0.6092		6.98098	15.014	12.3821
300838	13.28	1.5038	0.6104		6.98519	15.023	12.4065
301038	13.294	1.505	0.6117		6.99255	15.035	12.4329
301238	13.28	1.5061	0.6135		6.98519	15.046	12.4695
301438	13.272	1.5068	0.6151		6.98098	15.0529	12.502
301638	13.28	1.5076	0.616		6.98519	15.0609	12.5203
301838	13.214	1.5093	0.6249		6.95047	15.0779	12.7012
302038	13.194	1.5096	0.6271		6.93995	15.0809	12.7459
302238	13.212	1.5107	0.6286		6.94942	15.0919	12.7764
302438	13.232	1.512	0.6299		6.95994	15.1049	12.8028
302638	13.242	1.5131	0.6309		6.9652	15.1159	12.8232
302838	13.252	1.514	0.6321		6.97046	15.1249	12.8476
303038	13.26	1.5151	0.6333		6.97467	15.1359	12.872
303238	12.472	1.5127	0.6587		6.56018	15.1119	13.3882
303438	12.444	1.5153	0.6607		6.54546	15.1379	13.4289
303638	12.56	1.5186	0.6616		6.60647	15.1708	13.4472
303838	12.564	1.5192	0.6625		6.60858	15.1768	13.4654
304038	12.576	1.5201	0.6634		6.61489	15.1858	13.4837
304238	12.59	1.5207	0.6643		6.62225	15.1918	13.502
304438	12.544	1.5215	0.6709		6.59806	15.1998	13.6362
304638	12.584	1.5232	0.6728		6.6191	15.2168	13.6748
304838	12.578	1.5235	0.6743		6.61594	15.2198	13.7053
305038	12.616	1.525	0.6755		6.63593	15.2348	13.7297
305238	12.614	1.5257	0.6766		6.63487	15.2418	13.752
305438	12.64	1.5269	0.6779		6.64855	15.2537	13.7785
305638	12.648	1.5278	0.6796		6.65276	15.2627	13.813
305838	12.66	1.5288	0.6813		6.65907	15.2727	13.8476
306038	12.668	1.5301	0.6864		6.66328	15.2857	13.9512
306238	12.672	1.5309	0.6884		6.66538	15.2937	13.9919
306438	12.674	1.5319	0.6899		6.66643	15.3037	14.0224
306638	12.678	1.5328	0.6911		6.66854	15.3127	14.0467
306838	12.656	1.5342	0.6929		6.65697	15.3267	14.0833
307038	12.622	1.5348	0.6945		6.63908	15.3327	14.1159
307238	12.644	1.536	0.6955		6.65065	15.3447	14.1362
307438	12.65	1.537	0.6967		6.65381	15.3546	14.1606
307638	12.664	1.538	0.6975		6.66117	15.3646	14.1768
307838	12.668	1.5387	0.6985		6.66328	15.3716	14.1972
308038	12.69	1.5398	0.6993		6.67485	15.3826	14.2134
308238	12.706	1.541	0.7003		6.68327	15.3946	14.2337
308438	12.712	1.5419	0.7012		6.68642	15.4036	14.252
308638	12.722	1.5429	0.7022		6.69168	15.4136	14.2724
308838	12.734	1.5439	0.7031		6.69799	15.4236	14.2907
309038	12.748	1.5448	0.7041		6.70536	15.4326	14.311
309238	12.76	1.5458	0.705		6.71167	15.4426	14.3293
309438	12.776	1.5468	0.706		6.72009	15.4525	14.3496
309638	12.778	1.5479	0.7071		6.72114	15.4635	14.372
309838	12.784	1.5489	0.7081		6.72429	15.4735	14.3923
310038	12.796	1.5498	0.709		6.73061	15.4825	14.4106
310238	12.806	1.5508	0.7099		6.73587	15.4925	14.4289
310438	12.812	1.5519	0.7111		6.73902	15.5035	14.4533
310638	12.82	1.5528	0.7124		6.74323	15.5125	14.4797
310838	12.82	1.5536	0.7135		6.74323	15.5205	14.502
311038	12.812	1.5547	0.7146		6.73902	15.5315	14.5244
311238	12.81	1.5559	0.7161		6.73797	15.5435	14.5549
311438	12.782	1.5571	0.7187		6.72324	15.5554	14.6077
311638	12.742	1.5578	0.7202		6.7022	15.5624	14.6382
311838	12.736	1.5588	0.7218		6.69905	15.5724	14.6707
312038	12.736	1.5599	0.7231		6.69905	15.5834	14.6972
312238	12.704	1.5611	0.7246		6.68221	15.5954	14.7276
312438	12.69	1.5617	0.7262		6.67485	15.6014	14.7602
312638	12.696	1.5626	0.7274		6.67801	15.6104	14.7846
312838	12.706	1.5638	0.7285		6.68327	15.6224	14.8069
313038	12.718	1.5648	0.7296		6.68958	15.6324	14.8293
313238	12.726	1.5659	0.7305		6.69379	15.6434	14.8476
313438	12.738	1.5669	0.7316		6.7001	15.6533	14.8699
313638	12.75	1.5679	0.7326		6.70641	15.6633	14.8902
313838	12.766	1.5689	0.7335		6.71483	15.6733	14.9085
314038	12.776	1.57	0.7345		6.72009	15.6843	14.9289
314238	12.788	1.5709	0.7354		6.7264	15.6933	14.9472
314438	12.8	1.5717	0.7365		6.73271	15.7013	14.9695
314638	12.816	1.5727	0.7376		6.74113	15.7113	14.9919
314838	12.826	1.5738	0.7387		6.74639	15.7223	15.0142
315038	12.84	1.5749	0.7398		6.75375	15.7333	15.0366
315238	12.85	1.5758	0.7407		6.75901	15.7423	15.0549
315438	12.864	1.5768	0.7417		6.76637	15.7522	15.0752
315638	12.878	1.5778	0.7428		6.77374	15.7622	15.0976
315838	12.884	1.5788	0.7439		6.77689	15.7722	15.1199
316038	12.888	1.5796	0.7448		6.779	15.7802	15.1382
316238	12.9	1.5807	0.7457		6.78531	15.7912	15.1565
316438	12.916	1.5817	0.747		6.79372	15.8012	15.1829
316638	12.926	1.5828	0.7481		6.79898	15.8122	15.2053
316838	12.94	1.5841	0.7492		6.80635	15.8252	15.2276
317038	12.952	1.5852	0.7502		6.81266	15.8362	15.248
317238	12.95	1.5858	0.7511		6.81161	15.8422	15.2663
317438	12.964	1.5866	0.7519		6.81897	15.8501	15.2825
317638	12.978	1.5878	0.7528		6.82634	15.8621	15.3008
317838	12.992	1.5888	0.7538		6.8337	15.8721	15.3211
318038	13.002	1.5899	0.7549		6.83896	15.8831	15.3435
318238	13.008	1.5906	0.7559		6.84212	15.8901	15.3638
318438	13.018	1.5917	0.7568		6.84738	15.9011	15.3821
318638	13.03	1.5928	0.7578		6.85369	15.9121	15.4024
318838	13.038	1.5938	0.7588		6.8579	15.9221	15.4228
319038	13.05	1.5949	0.7599		6.86421	15.9331	15.4451
319238	13.06	1.5958	0.7609		6.86947	15.9421	15.4654
319438	13.072	1.5969	0.7621		6.87578	15.953	15.4898
319638	13.08	1.5978	0.763		6.87999	15.962	15.5081
319838	13.092	1.5988	0.7641		6.8863	15.972	15.5305
320038	13.104	1.5999	0.7651		6.89261	15.983	15.5508
320238	13.112	1.6008	0.7661		6.89682	15.992	15.5711
320438	13.122	1.6017	0.7674		6.90208	16.001	15.5976
320638	13.132	1.6027	0.7686		6.90734	16.011	15.622
320838	13.144	1.6038	0.7701		6.91365	16.022	15.6524
321038	13.154	1.6048	0.7714		6.91891	16.032	15.6789
321238	13.166	1.6057	0.7726		6.92522	16.041	15.7033
321438	13.174	1.6068	0.774		6.92943	16.0519	15.7317
321638	13.186	1.6079	0.7755		6.93574	16.0629	15.7622
321838	13.194	1.6089	0.7767		6.93995	16.0729	15.7866
322038	13.192	1.6099	0.7781		6.9389	16.0829	15.815
322238	13.188	1.6108	0.7798		6.93679	16.0919	15.8496
322438	13.194	1.6116	0.7807		6.93995	16.0999	15.8679
322638	13.214	1.6129	0.7818		6.95047	16.1129	15.8902
322838	13.224	1.6141	0.7829		6.95573	16.1249	15.9126
323038	13.226	1.615	0.7843		6.95678	16.1339	15.9411
323238	13.228	1.6157	0.7858		6.95783	16.1409	15.9715
323438	13.234	1.6166	0.7869		6.96099	16.1499	15.9939
323638	13.242	1.6176	0.7881		6.9652	16.1598	16.0183
323838	13.252	1.6185	0.7896		6.97046	16.1688	16.0488
324038	13.258	1.6198	0.7912		6.97361	16.1818	16.0813
324238	13.266	1.6207	0.7932		6.97782	16.1908	16.122
324438	13.274	1.6219	0.795		6.98203	16.2028	16.1585
324638	13.276	1.6228	0.7963		6.98308	16.2118	16.185
324838	13.284	1.6238	0.7973		6.98729	16.2218	16.2053
325038	13.294	1.6247	0.7983		6.99255	16.2308	16.2256
325238	13.308	1.6257	0.7992		6.99991	16.2408	16.2439
325438	13.314	1.6268	0.8002		7.00307	16.2517	16.2642
325638	13.324	1.6277	0.8011		7.00833	16.2607	16.2825
325838	13.33	1.6287	0.8019		7.01149	16.2707	16.2988
326038	13.338	1.6297	0.8029		7.01569	16.2807	16.3191
326238	13.348	1.6309	0.8039		7.02095	16.2927	16.3394
326438	13.336	1.6319	0.8054		7.01464	16.3027	16.3699
326638	13.33	1.6327	0.8071		7.01149	16.3107	16.4045
326838	13.33	1.6336	0.8083		7.01149	16.3197	16.4289
327038	13.34	1.6347	0.8094		7.01675	16.3307	16.4512
327238	13.348	1.6357	0.8105		7.02095	16.3407	16.4736
327438	13.346	1.6368	0.8115		7.0199	16.3516	16.4939
327638	13.348	1.6378	0.8125		7.02095	16.3616	16.5142
327838	13.356	1.6387	0.8135		7.02516	16.3706	16.5346
328038	13.358	1.6396	0.8145		7.02621	16.3796	16.5549
328238	13.354	1.6408	0.8158		7.02411	16.3916	16.5813
328438	13.356	1.6417	0.8172		7.02516	16.4006	16.6098
328638	13.35	1.6428	0.8185		7.02201	16.4116	16.6362
328838	13.356	1.6437	0.8196		7.02516	16.4206	16.6585
329038	13.366	1.6447	0.8207		7.03042	16.4306	16.6809
329238	13.376	1.646	0.8221		7.03568	16.4436	16.7093
329438	13.38	1.6469	0.8233		7.03779	16.4525	16.7337
329638	13.366	1.6478	0.8246		7.03042	16.4615	16.7602
329838	13.362	1.6485	0.8256		7.02832	16.4685	16.7805
330038	13.372	1.6496	0.8266		7.03358	16.4795	16.8008
330238	13.374	1.6509	0.8282		7.03463	16.4925	16.8333
330438	13.356	1.6521	0.8302		7.02516	16.5045	16.874
330638	13.34	1.653	0.832		7.01675	16.5135	16.9106
330838	13.322	1.6538	0.8335		7.00728	16.5215	16.9411
331038	13.312	1.6545	0.8346		7.00202	16.5285	16.9634
331238	13.32	1.6555	0.8357		7.00623	16.5385	16.9858
331438	13.324	1.6566	0.837		7.00833	16.5495	17.0122
331638	13.326	1.6577	0.8381		7.00938	16.5604	17.0346
331838	13.33	1.6586	0.8394		7.01149	16.5694	17.061
332038	13.334	1.6597	0.8406		7.01359	16.5804	17.0854
332238	13.338	1.6607	0.8419		7.01569	16.5904	17.1118
332438	13.34	1.6616	0.8429		7.01675	16.5994	17.1321
332638	13.3	1.6625	0.8441		6.99571	16.6084	17.1565
332838	13.248	1.6634	0.8463		6.96835	16.6174	17.2012
333038	13.228	1.6646	0.8487		6.95783	16.6294	17.25
333238	13.212	1.6656	0.8506		6.94942	16.6394	17.2886
333438	13.186	1.6667	0.8527		6.93574	16.6503	17.3313
333638	13.162	1.6677	0.8543		6.92312	16.6603	17.3638
333838	13.146	1.6687	0.8559		6.9147	16.6703	17.3963
334038	13.134	1.6696	0.8572		6.90839	16.6793	17.4228
334238	13.128	1.6706	0.8585		6.90524	16.6893	17.4492
334438	13.122	1.6717	0.8599		6.90208	16.7003	17.4776
334638	13.12	1.6727	0.8611		6.90103	16.7103	17.502
334838	13.104	1.6736	0.8626		6.89261	16.7193	17.5325
335038	13.092	1.6746	0.8641		6.8863	16.7293	17.563
335238	13.078	1.6757	0.8654		6.87894	16.7403	17.5894
335438	13.066	1.6767	0.8667		6.87262	16.7502	17.6159
335638	13.036	1.6777	0.8682		6.85684	16.7602	17.6463
335838	12.992	1.6789	0.87		6.8337	16.7722	17.6829
336038	12.95	1.6798	0.872		6.81161	16.7812	17.7236
336238	12.918	1.681	0.8738		6.79478	16.7932	17.7602
336438	12.77	1.6817	0.8757		6.71693	16.8002	17.7988
336638	12.714	1.6831	0.881		6.68747	16.8142	17.9065
336838	12.69	1.6841	0.8832		6.67485	16.8242	17.9512
337038	12.672	1.6849	0.8847		6.66538	16.8322	17.9817
337238	12.666	1.6857	0.8859		6.66223	16.8402	18.0061
337438	12.672	1.6867	0.8869		6.66538	16.8501	18.0264
337638	12.68	1.6878	0.8878		6.66959	16.8611	18.0447
337838	12.686	1.6888	0.8889		6.67275	16.8711	18.0671
338038	12.69	1.6898	0.8899		6.67485	16.8811	18.0874
338238	12.694	1.6908	0.8908		6.67695	16.8911	18.1057
338438	12.694	1.6919	0.8919		6.67695	16.9021	18.128
338638	12.692	1.6926	0.893		6.6759	16.9091	18.1504
338838	12.694	1.6935	0.8939		6.67695	16.9181	18.1687
339038	12.694	1.6945	0.8949		6.67695	16.9281	18.189
339238	12.696	1.6955	0.8959		6.67801	16.9381	18.2093
339438	12.69	1.6965	0.8971		6.67485	16.9481	18.2337
339638	12.674	1.6977	0.8983		6.66643	16.96	18.2581
339838	12.654	1.6988	0.8998		6.65591	16.971	18.2886
340038	12.63	1.6997	0.9011		6.64329	16.98	18.315
340238	12.506	1.7013	0.904		6.57807	16.996	18.374
340438	12.292	1.7016	0.9066		6.46551	16.999	18.4268
340638	12.182	1.7028	0.9084		6.40765	17.011	18.4634
340838	12.024	1.7034	0.9107		6.32454	17.017	18.5102
341038	11.66	1.7065	0.9143		6.13308	17.048	18.5833
341238	10.73	1.7049	0.928		5.6439	17.032	18.8618
341438	10.648	1.7061	0.9314		5.60077	17.044	18.9309
341638	10.568	1.7074	0.9334		5.55869	17.0569	18.9715
341838	10.572	1.7088	0.9346		5.5608	17.0709	18.9959
342038	10.528	1.7094	0.9358		5.53765	17.0769	19.0203
342238	10.528	1.7108	0.9369		5.53765	17.0909	19.0427
342438	10.514	1.7117	0.9378		5.53029	17.0999	19.061
342638	10.508	1.7128	0.9389		5.52713	17.1109	19.0833
342838	10.496	1.7138	0.9399		5.52082	17.1209	19.1037
343038	10.484	1.7146	0.9408		5.51451	17.1289	19.122
343238	10.48	1.7157	0.9416		5.51241	17.1399	19.1382
343438	10.478	1.7166	0.9425		5.51135	17.1489	19.1565
343638	10.47	1.7174	0.9433		5.50715	17.1568	19.1728
343838	10.468	1.7185	0.9442		5.50609	17.1678	19.1911
344038	10.46	1.7194	0.9451		5.50189	17.1768	19.2093
344238	10.462	1.7206	0.9459		5.50294	17.1888	19.2256
344438	10.44	1.722	0.9474		5.49137	17.2028	19.2561
344638	10.408	1.7227	0.9484		5.47453	17.2098	19.2764
344838	10.39	1.7237	0.9493		5.46507	17.2198	19.2947
345038	10.384	1.7245	0.9501		5.46191	17.2278	19.311
345238	10.378	1.7256	0.9508		5.45875	17.2388	19.3252
345438	10.368	1.7264	0.9515		5.45349	17.2468	19.3394
345638	10.364	1.7273	0.9525		5.45139	17.2557	19.3598
345838	10.354	1.7283	0.9533		5.44613	17.2657	19.376
346038	10.338	1.7295	0.9545		5.43771	17.2777	19.4004
346238	10.096	1.731	0.9611		5.31042	17.2927	19.5346
346438	9.962	1.7319	0.9641		5.23994	17.3017	19.5955
346638	9.896	1.7323	0.9655		5.20523	17.3057	19.624
346838	9.88	1.7334	0.9663		5.19681	17.3167	19.6402
347038	9.87	1.7349	0.9671		5.19155	17.3317	19.6565
347238	9.836	1.7351	0.9681		5.17367	17.3337	19.6768
347438	9.844	1.7365	0.9693		5.17787	17.3477	19.7012
347638	9.836	1.7379	0.971		5.17367	17.3616	19.7358
347838	9.816	1.7382	0.9723		5.16315	17.3646	19.7622
348038	9.824	1.7393	0.9734		5.16735	17.3756	19.7846
348238	9.828	1.7405	0.9751		5.16946	17.3876	19.8191
348438	9.83	1.7419	0.9771		5.17051	17.4016	19.8598
348638	9.81	1.7425	0.9785		5.15999	17.4076	19.8882
348838	9.81	1.7432	0.9794		5.15999	17.4146	19.9065
349038	9.816	1.7444	0.9803		5.16315	17.4266	19.9248
349238	9.826	1.7456	0.9812		5.16841	17.4386	19.9431
349438	9.818	1.7467	0.9822		5.1642	17.4496	19.9634
349638	9.804	1.7474	0.9832		5.15683	17.4565	19.9837
349838	9.802	1.7484	0.984		5.15578	17.4665	20
350038	9.808	1.7495	0.9847		5.15894	17.4775	20.0142
350238	9.808	1.7504	0.9855		5.15894	17.4865	20.0305
350438	9.814	1.7513	0.9862		5.16209	17.4955	20.0447
350638	9.822	1.7524	0.9875		5.1663	17.5065	20.0711
350838	9.816	1.7535	0.9891		5.16315	17.5175	20.1037
351038	9.818	1.7545	0.9905		5.1642	17.5275	20.1321
351238	9.814	1.7554	0.9914		5.16209	17.5365	20.1504
351438	9.814	1.7563	0.9923		5.16209	17.5455	20.1687
351638	9.816	1.7574	0.9934		5.16315	17.5564	20.1911
351838	9.816	1.7584	0.9944		5.16315	17.5664	20.2114
352038	9.808	1.7594	0.9953		5.15894	17.5764	20.2297
352238	9.804	1.7605	0.9961		5.15683	17.5874	20.2459
352438	9.768	1.762	0.9974		5.1379	17.6024	20.2724
352638	9.722	1.7627	0.9989		5.1137	17.6094	20.3028
352838	9.678	1.7634	1.0001		5.09056	17.6164	20.3272
353038	9.652	1.7642	1.0012		5.07688	17.6244	20.3496
353238	9.652	1.7653	1.0021		5.07688	17.6354	20.3679
353438	9.646	1.7664	1.003		5.07373	17.6464	20.3862
353638	9.644	1.7675	1.0038		5.07268	17.6573	20.4024
353838	9.642	1.7685	1.0047		5.07162	17.6673	20.4207
354038	9.644	1.7696	1.0056		5.07268	17.6783	20.439
354238	9.636	1.7706	1.0064		5.06847	17.6883	20.4553
354438	9.628	1.7715	1.007		5.06426	17.6973	20.4675
354638	9.624	1.7725	1.0079		5.06216	17.7073	20.4858
354838	9.61	1.7735	1.0087		5.05479	17.7173	20.502
355038	9.594	1.7746	1.0101		5.04638	17.7283	20.5305
355238	9.578	1.7757	1.0114		5.03796	17.7393	20.5569
355438	9.564	1.7766	1.0125		5.0306	17.7483	20.5793
355638	9.55	1.7776	1.0136		5.02323	17.7582	20.6016
355838	9.542	1.7787	1.0146		5.01902	17.7692	20.622
356038	9.532	1.7795	1.0155		5.01376	17.7772	20.6402
356238	9.516	1.7805	1.0164		5.00535	17.7872	20.6585
356438	9.504	1.7814	1.0172		4.99904	17.7962	20.6748
356638	9.5	1.7826	1.018		4.99693	17.8082	20.6911
356838	9.492	1.7837	1.0187		4.99272	17.8192	20.7053
357038	9.476	1.7847	1.0197		4.98431	17.8292	20.7256
357238	9.444	1.7856	1.0205		4.96748	17.8382	20.7419
357438	9.376	1.7866	1.0214		4.93171	17.8482	20.7602
357638	9.28	1.7879	1.023		4.88121	17.8611	20.7927
357838	9.206	1.7889	1.0245		4.84229	17.8711	20.8232
358038	9.134	1.7894	1.0257		4.80442	17.8761	20.8476
358238	9.064	1.7902	1.0268		4.7676	17.8841	20.8699
358438	8.922	1.7916	1.0291		4.69291	17.8981	20.9167
358638	8.692	1.793	1.0335		4.57193	17.9121	21.0061
358838	8.498	1.7939	1.038		4.46989	17.9211	21.0976
359038	8.392	1.7942	1.0407		4.41413	17.9241	21.1524
359238	8.314	1.795	1.0425		4.37311	17.9321	21.189
359438	8.274	1.7963	1.0442		4.35207	17.9451	21.2236
359638	8.252	1.7973	1.0457		4.34049	17.955	21.2541
359838	8.236	1.7983	1.0468		4.33208	17.965	21.2764
360038	8.22	1.7993	1.0482		4.32366	17.975	21.3049
360238	8.216	1.8002	1.0493		4.32156	17.984	21.3272
360438	8.214	1.8014	1.0503		4.32051	17.996	21.3476
360638	8.212	1.8023	1.0513		4.31945	18.005	21.3679
360838	8.208	1.8032	1.0521		4.31735	18.014	21.3841
361038	8.21	1.8043	1.0531		4.3184	18.025	21.4045
361238	8.208	1.8053	1.0564		4.31735	18.035	21.4715
361438	8.204	1.8064	1.0575		4.31525	18.046	21.4939
361638	8.204	1.8074	1.0583		4.31525	18.0559	21.5102
361838	8.208	1.8082	1.0592		4.31735	18.0639	21.5285
362038	8.204	1.8092	1.0599		4.31525	18.0739	21.5427
362238	8.202	1.8104	1.0606		4.31419	18.0859	21.5569
362438	8.194	1.8115	1.0613		4.30999	18.0969	21.5711
362638	8.194	1.8127	1.0621		4.30999	18.1089	21.5874
362838	8.196	1.8136	1.0629		4.31104	18.1179	21.6037
363038	8.188	1.8148	1.0637		4.30683	18.1299	21.6199
363238	8.182	1.8156	1.0645		4.30367	18.1379	21.6362
363438	8.182	1.8165	1.0653		4.30367	18.1469	21.6524
363638	8.178	1.8176	1.0661		4.30157	18.1578	21.6687
363838	8.174	1.8185	1.0669		4.29947	18.1668	21.685
364038	8.178	1.8195	1.0677		4.30157	18.1768	21.7012
364238	8.18	1.8204	1.0683		4.30262	18.1858	21.7134
364438	8.168	1.8213	1.0691		4.29631	18.1948	21.7297
364638	8.166	1.8222	1.0698		4.29526	18.2038	21.7439
364838	8.164	1.8235	1.0708		4.29421	18.2168	21.7642
365038	8.166	1.8244	1.0715		4.29526	18.2258	21.7785
365238	8.158	1.8255	1.0723		4.29105	18.2368	21.7947
365438	8.13	1.8264	1.0742		4.27632	18.2458	21.8333
365638	8.116	1.8274	1.0759		4.26896	18.2557	21.8679
365838	8.106	1.8284	1.077		4.2637	18.2657	21.8902
366038	8.106	1.8293	1.0779		4.2637	18.2747	21.9085
366238	8.106	1.8305	1.0788		4.2637	18.2867	21.9268
366438	8.1	1.8316	1.0797		4.26054	18.2977	21.9451
366638	8.1	1.8324	1.0805		4.26054	18.3057	21.9614
366838	8.096	1.8334	1.0813		4.25844	18.3157	21.9776
367038	8.1	1.8343	1.082		4.26054	18.3247	21.9919
367238	8.104	1.8353	1.0826		4.26265	18.3347	22.0041
367438	8.116	1.8364	1.0833		4.26896	18.3457	22.0183
367638	8.118	1.8374	1.0841		4.27001	18.3556	22.0346
367838	8.12	1.8383	1.0847		4.27106	18.3646	22.0467
368038	8.122	1.8393	1.0854		4.27211	18.3746	22.061
368238	8.128	1.8401	1.086		4.27527	18.3826	22.0732
368438	8.136	1.8412	1.0868		4.27948	18.3936	22.0894
368638	8.15	1.8424	1.0874		4.28684	18.4056	22.1016
368838	8.158	1.8436	1.0883		4.29105	18.4176	22.1199
369038	8.16	1.8447	1.0892		4.2921	18.4286	22.1382
369238	8.158	1.8456	1.0901		4.29105	18.4376	22.1565
369438	8.158	1.8464	1.0908		4.29105	18.4456	22.1707
369638	8.166	1.8475	1.0914		4.29526	18.4565	22.1829
369838	8.162	1.8485	1.0923		4.29315	18.4665	22.2012
370038	8.156	1.8492	1.093		4.29	18.4735	22.2154
370238	8.16	1.85	1.0938		4.2921	18.4815	22.2317
370438	8.164	1.8511	1.0945		4.29421	18.4925	22.2459
370638	8.168	1.8521	1.0955		4.29631	18.5025	22.2663
370838	8.166	1.8534	1.0966		4.29526	18.5155	22.2886
371038	8.168	1.8543	1.0977		4.29631	18.5245	22.311
371238	8.164	1.8553	1.0986		4.29421	18.5345	22.3293
371438	8.17	1.8565	1.0994		4.29736	18.5465	22.3455
371638	8.166	1.8576	1.1005		4.29526	18.5574	22.3679
371838	8.156	1.8586	1.1013		4.29	18.5674	22.3841
372038	8.15	1.8597	1.1021		4.28684	18.5784	22.4004
372238	8.146	1.8607	1.103		4.28474	18.5884	22.4187
372438	8.138	1.8616	1.1038		4.28053	18.5974	22.435
372638	8.114	1.8626	1.1049		4.26791	18.6074	22.4573
372838	8.094	1.8636	1.106		4.25739	18.6174	22.4797
373038	8.078	1.8643	1.1072		4.24897	18.6244	22.5041
373238	8.06	1.8654	1.1089		4.2395	18.6354	22.5386
373438	8.044	1.8663	1.1102		4.23109	18.6444	22.565
373638	8.034	1.8672	1.1113		4.22583	18.6533	22.5874
373838	8.03	1.8681	1.1123		4.22372	18.6623	22.6077
374038	8.03	1.8692	1.1134		4.22372	18.6733	22.6301
374238	8.032	1.8705	1.1147		4.22478	18.6863	22.6565
374438	8.03	1.8717	1.1159		4.22372	18.6983	22.6809
374638	8.024	1.8727	1.1171		4.22057	18.7083	22.7053
374838	8.012	1.8734	1.1193		4.21426	18.7153	22.75
375038	8.01	1.8742	1.1207		4.2132	18.7233	22.7785
375238	8.006	1.8752	1.1217		4.2111	18.7333	22.7988
375438	8.01	1.8761	1.1224		4.2132	18.7423	22.813
375638	8.016	1.8771	1.1232		4.21636	18.7522	22.8293
375838	8.018	1.878	1.1242		4.21741	18.7612	22.8496
376038	8.022	1.8791	1.125		4.21952	18.7722	22.8659
376238	8.018	1.8802	1.1258		4.21741	18.7832	22.8821
376438	8.02	1.8811	1.1267		4.21846	18.7922	22.9004
376638	8.022	1.8822	1.1277		4.21952	18.8032	22.9207
376838	8.026	1.8835	1.1286		4.22162	18.8162	22.939
377038	8.018	1.8845	1.1296		4.21741	18.8262	22.9593
377238	8.016	1.8855	1.1306		4.21636	18.8362	22.9797
377438	8.016	1.8865	1.1315		4.21636	18.8462	22.998
377638	7.944	1.8875	1.1326		4.17849	18.8561	23.0203
377838	7.914	1.8886	1.1342		4.16271	18.8671	23.0528
378038	7.892	1.8896	1.1357		4.15114	18.8771	23.0833
378238	7.878	1.8907	1.1365		4.14377	18.8881	23.0996
378438	7.87	1.8915	1.1375		4.13956	18.8961	23.1199
378638	7.862	1.8925	1.1381		4.13536	18.9061	23.1321
378838	7.858	1.8935	1.1388		4.13325	18.9161	23.1463
379038	7.862	1.8944	1.1395		4.13536	18.9251	23.1606
379238	7.866	1.8955	1.1403		4.13746	18.9361	23.1768
379438	7.868	1.8964	1.141		4.13851	18.9451	23.1911
379638	7.872	1.8973	1.1418		4.14062	18.954	23.2073
379838	7.878	1.8984	1.1426		4.14377	18.965	23.2236
380038	7.888	1.8994	1.1433		4.14903	18.975	23.2378
380238	7.894	1.9004	1.144		4.15219	18.985	23.252
380438	7.902	1.9014	1.1446		4.1564	18.995	23.2642
380638	7.908	1.9025	1.1454		4.15955	19.006	23.2805
380838	7.91	1.9035	1.146		4.1606	19.016	23.2927
381038	7.894	1.9043	1.1468		4.15219	19.024	23.3089
381238	7.892	1.9053	1.1476		4.15114	19.034	23.3252
381438	7.894	1.9064	1.1484		4.15219	19.045	23.3415
381638	7.898	1.9075	1.1493		4.15429	19.0559	23.3598
381838	7.9	1.9084	1.1501		4.15534	19.0649	23.376
382038	7.902	1.9094	1.1508		4.1564	19.0749	23.3902
382238	7.908	1.9105	1.1516		4.15955	19.0859	23.4065
382438	7.91	1.9114	1.1529		4.1606	19.0949	23.4329
382638	7.914	1.9124	1.1545		4.16271	19.1049	23.4654
382838	7.912	1.9132	1.1558		4.16166	19.1129	23.4919
383038	7.922	1.9143	1.1568		4.16692	19.1239	23.5122
383238	7.926	1.9153	1.1578		4.16902	19.1339	23.5325
383438	7.934	1.9164	1.1585		4.17323	19.1449	23.5467
383638	7.936	1.9174	1.1594		4.17428	19.1548	23.565
383838	7.942	1.9184	1.1603		4.17744	19.1648	23.5833
384038	7.946	1.9194	1.161		4.17954	19.1748	23.5976
384238	7.948	1.9203	1.1619		4.18059	19.1838	23.6159
384438	7.95	1.9214	1.1628		4.18164	19.1948	23.6341
384638	7.954	1.9225	1.1637		4.18375	19.2058	23.6524
384838	7.956	1.9234	1.1645		4.1848	19.2148	23.6687
385038	7.958	1.9245	1.1654		4.18585	19.2258	23.687

## Sheet: GB-7
Force (small)	--	journey	) Results Report
17:21:53,06/23/2019
Diameter: 49.3	mm	Height: 99.7	mm
Vertical force transducer (Test piece vertical force)
Control mode: displacement	Waveform: Slope
mm/s	Force the finish: 1.9629	mm	Confining pressure rate :0.500	MPa/s	End point of confining pressure :6.00060	MPa
Time (ms)	Vertical force (KN)	Vertical deformation (mm)	Confining pressure (MPa)		stress	Axial strain	Lateral strain
0	0	0	0		0	0	0
200	0.012	0.0004	0.0001		0.00628634	0.00401204	0.0020284
400	0.014	0.0012	0		0.00733406	0.0120361	0
600	0.032	0.0033	0		0.0167636	0.0330993	0
800	0.036	0.0041	0		0.018859	0.0411234	0
1000	0.044	0.0053	0		0.0230499	0.0531595	0
1200	0.052	0.0064	0		0.0272408	0.0641926	0
1400	0.056	0.0071	0		0.0293362	0.0712136	0
1600	0.062	0.0083	-0.0001		0.0324794	0.0832497	-0.0020284
1800	0.07	0.0094	-0.0001		0.0366703	0.0942828	-0.0020284
2000	0.074	0.0105	-0.0001		0.0387657	0.105316	-0.0020284
2200	0.074	0.0112	-0.0001		0.0387657	0.112337	-0.0020284
2400	0.08	0.0122	-0.0001		0.0419089	0.122367	-0.0020284
2600	0.084	0.0135	-0.0002		0.0440043	0.135406	-0.0040568
2800	0.088	0.0141	-0.0002		0.0460998	0.141424	-0.0040568
3000	0.092	0.0153	-0.0003		0.0481952	0.15346	-0.00608519
3200	0.094	0.0163	-0.0003		0.049243	0.16349	-0.00608519
3400	0.098	0.0173	-0.0003		0.0513384	0.173521	-0.00608519
3600	0.102	0.0185	-0.0004		0.0534338	0.185557	-0.00811359
3800	0.106	0.0193	-0.0004		0.0555293	0.193581	-0.00811359
4000	0.106	0.0203	-0.0004		0.0555293	0.203611	-0.00811359
4200	0.11	0.0213	-0.0004		0.0576247	0.213641	-0.00811359
4400	0.118	0.0222	-0.0005		0.0618156	0.222668	-0.010142
4600	0.118	0.0233	-0.0005		0.0618156	0.233701	-0.010142
4800	0.124	0.0244	-0.0005		0.0649588	0.244734	-0.010142
5000	0.126	0.0253	-0.0005		0.0660065	0.253761	-0.010142
5200	0.13	0.0263	-0.0005		0.068102	0.263791	-0.010142
5400	0.13	0.0274	-0.0006		0.068102	0.274824	-0.0121704
5600	0.134	0.0283	-0.0005		0.0701974	0.283852	-0.010142
5800	0.138	0.0294	-0.0005		0.0722929	0.294885	-0.010142
6000	0.142	0.0304	-0.0005		0.0743883	0.304915	-0.010142
6200	0.144	0.0313	-0.0005		0.075436	0.313942	-0.010142
6400	0.146	0.0324	-0.0005		0.0764837	0.324975	-0.010142
6600	0.152	0.0334	-0.0005		0.0796269	0.335005	-0.010142
6800	0.154	0.0342	-0.0003		0.0806746	0.343029	-0.00608519
7000	0.158	0.0353	-0.0004		0.0827701	0.354062	-0.00811359
7200	0.162	0.0363	-0.0003		0.0848655	0.364092	-0.00608519
7400	0.162	0.0373	-0.0003		0.0848655	0.374122	-0.00608519
7600	0.168	0.0384	-0.0003		0.0880087	0.385155	-0.00608519
7800	0.168	0.0395	-0.0002		0.0880087	0.396189	-0.0040568
8000	0.172	0.0404	-0.0003		0.0901041	0.405216	-0.00608519
8200	0.174	0.0412	-0.0003		0.0911519	0.41324	-0.00608519
8400	0.178	0.0422	-0.0002		0.0932473	0.42327	-0.0040568
8600	0.182	0.0435	-0.0001		0.0953427	0.436309	-0.0020284
8800	0.186	0.0445	-0.0002		0.0974382	0.446339	-0.0040568
9000	0.19	0.0452	-0.0002		0.0995336	0.45336	-0.0040568
9200	0.192	0.0464	-0.0001		0.100581	0.465396	-0.0020284
9400	0.198	0.0472	0		0.103725	0.47342	0
9600	0.202	0.0482	0		0.10582	0.48345	0
9800	0.202	0.0493	0.0001		0.10582	0.494483	0.0020284
10000	0.208	0.0504	0.0001		0.108963	0.505517	0.0020284
10200	0.214	0.0515	0.0001		0.112106	0.51655	0.0020284
10400	0.214	0.0524	0.0001		0.112106	0.525577	0.0020284
10600	0.216	0.0533	0.0002		0.113154	0.534604	0.0040568
10800	0.22	0.0543	0.0002		0.115249	0.544634	0.0040568
11000	0.224	0.0551	0.0002		0.117345	0.552658	0.0040568
11200	0.228	0.0562	0.0003		0.11944	0.563691	0.00608519
11400	0.23	0.0572	0.0003		0.120488	0.573721	0.00608519
11600	0.234	0.058	0.0004		0.122584	0.581745	0.00811359
11800	0.242	0.0592	0.0005		0.126774	0.593781	0.010142
12000	0.24	0.0602	0.0004		0.125727	0.603811	0.00811359
12200	0.248	0.0612	0.0005		0.129918	0.613842	0.010142
12400	0.248	0.0621	0.0005		0.129918	0.622869	0.010142
12600	0.254	0.0632	0.0005		0.133061	0.633902	0.010142
12800	0.258	0.0643	0.0006		0.135156	0.644935	0.0121704
13000	0.258	0.0652	0.0006		0.135156	0.653962	0.0121704
13200	0.264	0.0662	0.0006		0.138299	0.663992	0.0121704
13400	0.268	0.0672	0.0007		0.140395	0.674022	0.0141988
13600	0.274	0.0683	0.0007		0.143538	0.685055	0.0141988
13800	0.278	0.0693	0.0008		0.145633	0.695085	0.0162272
14000	0.28	0.0701	0.0008		0.146681	0.703109	0.0162272
14200	0.284	0.0712	0.0008		0.148777	0.714142	0.0162272
14400	0.288	0.0723	0.0009		0.150872	0.725176	0.0182556
14600	0.29	0.0732	0.0008		0.15192	0.734203	0.0162272
14800	0.294	0.0743	0.001		0.154015	0.745236	0.020284
15000	0.3	0.0752	0.001		0.157158	0.754263	0.020284
15200	0.302	0.0763	0.001		0.158206	0.765296	0.020284
15400	0.304	0.0773	0.001		0.159254	0.775326	0.020284
15600	0.312	0.0783	0.0011		0.163445	0.785356	0.0223124
15800	0.316	0.0793	0.0012		0.16554	0.795386	0.0243408
16000	0.318	0.0801	0.0011		0.166588	0.80341	0.0223124
16200	0.32	0.0811	0.0012		0.167636	0.81344	0.0243408
16400	0.324	0.0822	0.0012		0.169731	0.824473	0.0243408
16600	0.33	0.0833	0.0012		0.172874	0.835507	0.0243408
16800	0.336	0.0842	0.0013		0.176017	0.844534	0.0263692
17000	0.34	0.0852	0.0014		0.178113	0.854564	0.0283976
17200	0.344	0.0861	0.0014		0.180208	0.863591	0.0283976
17400	0.346	0.0872	0.0014		0.181256	0.874624	0.0283976
17600	0.35	0.0881	0.0014		0.183351	0.883651	0.0283976
17800	0.354	0.0892	0.0015		0.185447	0.894684	0.030426
18000	0.356	0.0901	0.0016		0.186495	0.903711	0.0324544
18200	0.362	0.0911	0.0016		0.189638	0.913741	0.0324544
18400	0.366	0.0921	0.0016		0.191733	0.923771	0.0324544
18600	0.37	0.0931	0.0017		0.193829	0.933801	0.0344828
18800	0.376	0.0941	0.0017		0.196972	0.943831	0.0344828
19000	0.378	0.0952	0.0017		0.19802	0.954865	0.0344828
19200	0.382	0.0961	0.0018		0.200115	0.963892	0.0365112
19400	0.386	0.0972	0.0018		0.20221	0.974925	0.0365112
19600	0.392	0.0982	0.0018		0.205354	0.984955	0.0365112
19800	0.394	0.0991	0.0018		0.206401	0.993982	0.0365112
20000	0.4	0.1002	0.0019		0.209545	1.00502	0.0385396
20200	0.402	0.1012	0.0019		0.210592	1.01505	0.0385396
20400	0.408	0.1021	0.0019		0.213735	1.02407	0.0385396
20600	0.41	0.1031	0.0019		0.214783	1.0341	0.0385396
20800	0.414	0.1042	0.0019		0.216879	1.04514	0.0385396
21000	0.422	0.1052	0.0019		0.221069	1.05517	0.0385396
21200	0.426	0.1063	0.002		0.223165	1.0662	0.040568
21400	0.43	0.1073	0.002		0.22526	1.07623	0.040568
21600	0.434	0.1083	0.002		0.227356	1.08626	0.040568
21800	0.44	0.1094	0.0021		0.230499	1.09729	0.0425963
22000	0.444	0.1103	0.0022		0.232594	1.10632	0.0446247
22200	0.446	0.1111	0.0021		0.233642	1.11434	0.0425963
22400	0.45	0.1122	0.0022		0.235738	1.12538	0.0446247
22600	0.454	0.1131	0.0022		0.237833	1.1344	0.0446247
22800	0.462	0.1141	0.0022		0.242024	1.14443	0.0446247
23000	0.466	0.115	0.0022		0.244119	1.15346	0.0446247
23200	0.468	0.1162	0.0023		0.245167	1.1655	0.0466531
23400	0.474	0.1172	0.0023		0.24831	1.17553	0.0466531
23600	0.478	0.1183	0.0024		0.250406	1.18656	0.0486815
23800	0.484	0.1192	0.0023		0.253549	1.19559	0.0466531
24000	0.488	0.1203	0.0024		0.255644	1.20662	0.0486815
24200	0.494	0.1212	0.0024		0.258787	1.21565	0.0486815
24400	0.496	0.1222	0.0023		0.259835	1.22568	0.0466531
24600	0.5	0.1233	0.0025		0.261931	1.23671	0.0507099
24800	0.506	0.1243	0.0025		0.265074	1.24674	0.0507099
25000	0.51	0.1253	0.0025		0.267169	1.25677	0.0507099
25200	0.514	0.1262	0.0025		0.269265	1.2658	0.0507099
25400	0.522	0.1273	0.0026		0.273456	1.27683	0.0527383
25600	0.526	0.1282	0.0027		0.275551	1.28586	0.0547667
25800	0.528	0.1292	0.0027		0.276599	1.29589	0.0547667
26000	0.532	0.1302	0.0027		0.278694	1.30592	0.0547667
26200	0.536	0.1313	0.0027		0.28079	1.31695	0.0547667
26400	0.542	0.1322	0.0028		0.283933	1.32598	0.0567951
26600	0.546	0.1333	0.0028		0.286028	1.33701	0.0567951
26800	0.552	0.1343	0.0028		0.289171	1.34704	0.0567951
27000	0.558	0.1353	0.0028		0.292315	1.35707	0.0567951
27200	0.562	0.1363	0.0029		0.29441	1.3671	0.0588235
27400	0.566	0.1373	0.003		0.296505	1.37713	0.0608519
27600	0.572	0.1382	0.003		0.299649	1.38616	0.0608519
27800	0.578	0.1393	0.003		0.302792	1.39719	0.0608519
28000	0.582	0.1403	0.003		0.304887	1.40722	0.0608519
28200	0.586	0.1412	0.0031		0.306983	1.41625	0.0628803
28400	0.592	0.1421	0.0031		0.310126	1.42528	0.0628803
28600	0.598	0.1432	0.0032		0.313269	1.43631	0.0649087
28800	0.602	0.1441	0.0031		0.315364	1.44534	0.0628803
29000	0.606	0.1451	0.0032		0.31746	1.45537	0.0649087
29200	0.614	0.1463	0.0032		0.321651	1.4674	0.0649087
29400	0.62	0.1471	0.0033		0.324794	1.47543	0.0669371
29600	0.622	0.1481	0.0033		0.325842	1.48546	0.0669371
29800	0.628	0.1491	0.0033		0.328985	1.49549	0.0669371
30000	0.634	0.1501	0.0033		0.332128	1.50552	0.0669371
30200	0.638	0.1511	0.0033		0.334223	1.51555	0.0669371
30400	0.644	0.1522	0.0033		0.337367	1.52658	0.0669371
30600	0.65	0.1531	0.0034		0.34051	1.53561	0.0689655
30800	0.656	0.1541	0.0034		0.343653	1.54564	0.0689655
31000	0.66	0.1552	0.0034		0.345748	1.55667	0.0689655
31200	0.666	0.1561	0.0034		0.348892	1.5657	0.0689655
31400	0.668	0.1571	0.0034		0.349939	1.57573	0.0689655
31600	0.678	0.1583	0.0035		0.355178	1.58776	0.0709939
31800	0.682	0.1593	0.0035		0.357273	1.59779	0.0709939
32000	0.688	0.1602	0.0035		0.360417	1.60682	0.0709939
32200	0.692	0.1613	0.0035		0.362512	1.61785	0.0709939
32400	0.698	0.1621	0.0036		0.365655	1.62588	0.0730223
32600	0.702	0.1632	0.0036		0.367751	1.63691	0.0730223
32800	0.708	0.1642	0.0036		0.370894	1.64694	0.0730223
33000	0.716	0.1653	0.0036		0.375085	1.65797	0.0730223
33200	0.722	0.1663	0.0036		0.378228	1.668	0.0730223
33400	0.726	0.1673	0.0037		0.380323	1.67803	0.0750507
33600	0.732	0.1682	0.0037		0.383466	1.68706	0.0750507
33800	0.74	0.1691	0.0037		0.387657	1.69609	0.0750507
34000	0.744	0.1702	0.0037		0.389753	1.70712	0.0750507
34200	0.748	0.1711	0.0038		0.391848	1.71615	0.0770791
34400	0.752	0.1722	0.0039		0.393944	1.72718	0.0791075
34600	0.758	0.1731	0.0039		0.397087	1.73621	0.0791075
34800	0.766	0.1742	0.0038		0.401278	1.74724	0.0770791
35000	0.768	0.1751	0.0039		0.402325	1.75627	0.0791075
35200	0.776	0.1762	0.0039		0.406516	1.7673	0.0791075
35400	0.78	0.1771	0.004		0.408612	1.77633	0.0811359
35600	0.788	0.1781	0.004		0.412803	1.78636	0.0811359
35800	0.794	0.1793	0.004		0.415946	1.7984	0.0811359
36000	0.8	0.1802	0.004		0.419089	1.80742	0.0811359
36200	0.804	0.1812	0.0041		0.421184	1.81745	0.0831643
36400	0.808	0.1822	0.0041		0.42328	1.82748	0.0831643
36600	0.818	0.183	0.0042		0.428519	1.83551	0.0851927
36800	0.822	0.1841	0.0041		0.430614	1.84654	0.0831643
37000	0.826	0.1851	0.0042		0.432709	1.85657	0.0851927
37200	0.832	0.1861	0.0043		0.435853	1.8666	0.0872211
37400	0.84	0.187	0.0042		0.440043	1.87563	0.0851927
37600	0.848	0.1882	0.0042		0.444234	1.88766	0.0851927
37800	0.852	0.1892	0.0042		0.44633	1.89769	0.0851927
38000	0.858	0.1903	0.0043		0.449473	1.90873	0.0872211
38200	0.866	0.1914	0.0043		0.453664	1.91976	0.0872211
38400	0.868	0.1923	0.0043		0.454712	1.92879	0.0872211
38600	0.876	0.1933	0.0043		0.458902	1.93882	0.0872211
38800	0.88	0.1943	0.0043		0.460998	1.94885	0.0872211
39000	0.888	0.1953	0.0044		0.465189	1.95888	0.0892495
39200	0.894	0.1961	0.0043		0.468332	1.9669	0.0872211
39400	0.902	0.1972	0.0044		0.472523	1.97793	0.0892495
39600	0.904	0.1982	0.0045		0.473571	1.98796	0.0912779
39800	0.91	0.1992	0.0045		0.476714	1.99799	0.0912779
40000	0.918	0.2001	0.0044		0.480905	2.00702	0.0892495
40200	0.924	0.2012	0.0045		0.484048	2.01805	0.0912779
40400	0.928	0.2022	0.0045		0.486143	2.02808	0.0912779
40600	0.936	0.2032	0.0046		0.490334	2.03811	0.0933063
40800	0.942	0.2042	0.0046		0.493477	2.04814	0.0933063
41000	0.946	0.2052	0.0045		0.495573	2.05817	0.0912779
41200	0.954	0.2062	0.0045		0.499764	2.0682	0.0912779
41400	0.958	0.2073	0.0046		0.501859	2.07924	0.0933063
41600	0.964	0.2082	0.0046		0.505002	2.08826	0.0933063
41800	0.972	0.2092	0.0046		0.509193	2.09829	0.0933063
42000	0.978	0.2102	0.0046		0.512336	2.10832	0.0933063
42200	0.984	0.2111	0.0046		0.515479	2.11735	0.0933063
42400	0.988	0.212	0.0046		0.517575	2.12638	0.0933063
42600	0.992	0.2131	0.0046		0.51967	2.13741	0.0933063
42800	1.002	0.214	0.0045		0.524909	2.14644	0.0912779
43000	1.006	0.2151	0.0046		0.527004	2.15747	0.0933063
43200	1.012	0.2162	0.0046		0.530148	2.16851	0.0933063
43400	1.016	0.2171	0.0046		0.532243	2.17753	0.0933063
43600	1.026	0.2181	0.0046		0.537482	2.18756	0.0933063
43800	1.03	0.2192	0.0046		0.539577	2.1986	0.0933063
44000	1.038	0.2202	0.0047		0.543768	2.20863	0.0953347
44200	1.044	0.2211	0.0047		0.546911	2.21765	0.0953347
44400	1.048	0.2221	0.0048		0.549007	2.22768	0.0973631
44600	1.056	0.2231	0.0048		0.553197	2.23771	0.0973631
44800	1.062	0.2241	0.0047		0.556341	2.24774	0.0953347
45000	1.068	0.2251	0.0047		0.559484	2.25777	0.0953347
45200	1.076	0.2261	0.0048		0.563675	2.2678	0.0973631
45400	1.082	0.2271	0.0048		0.566818	2.27783	0.0973631
45600	1.088	0.2281	0.0049		0.569961	2.28786	0.0993915
45800	1.094	0.229	0.0048		0.573104	2.29689	0.0973631
46000	1.1	0.23	0.0049		0.576247	2.30692	0.0993915
46200	1.108	0.2312	0.0049		0.580438	2.31896	0.0993915
46400	1.112	0.2321	0.0049		0.582534	2.32798	0.0993915
46600	1.12	0.2331	0.0049		0.586725	2.33801	0.0993915
46800	1.128	0.2341	0.0049		0.590915	2.34804	0.0993915
47000	1.134	0.2351	0.0049		0.594059	2.35807	0.0993915
47200	1.14	0.2361	0.0049		0.597202	2.3681	0.0993915
47400	1.144	0.237	0.0049		0.599297	2.37713	0.0993915
47600	1.154	0.238	0.0049		0.604536	2.38716	0.0993915
47800	1.16	0.239	0.0049		0.607679	2.39719	0.0993915
48000	1.166	0.24	0.005		0.610822	2.40722	0.10142
48200	1.174	0.241	0.005		0.615013	2.41725	0.10142
48400	1.18	0.242	0.005		0.618156	2.42728	0.10142
48600	1.184	0.243	0.005		0.620252	2.43731	0.10142
48800	1.192	0.244	0.0051		0.624443	2.44734	0.103448
49000	1.2	0.245	0.0051		0.628634	2.45737	0.103448
49200	1.21	0.2462	0.0052		0.633872	2.46941	0.105477
49400	1.22	0.247	0.0051		0.639111	2.47743	0.103448
49600	1.224	0.2481	0.0051		0.641206	2.48847	0.103448
49800	1.232	0.2491	0.0052		0.645397	2.4985	0.105477
50000	1.238	0.25	0.0052		0.64854	2.50752	0.105477
50200	1.242	0.2511	0.0052		0.650636	2.51856	0.105477
50400	1.252	0.252	0.0052		0.655874	2.52758	0.105477
50600	1.262	0.253	0.0053		0.661113	2.53761	0.107505
50800	1.268	0.2542	0.0052		0.664256	2.54965	0.105477
51000	1.276	0.2551	0.0053		0.668447	2.55868	0.107505
51200	1.28	0.2561	0.0054		0.670542	2.56871	0.109533
51400	1.29	0.2571	0.0053		0.675781	2.57874	0.107505
51600	1.296	0.258	0.0053		0.678924	2.58776	0.107505
51800	1.304	0.2591	0.0053		0.683115	2.5988	0.107505
52000	1.312	0.2601	0.0053		0.687306	2.60883	0.107505
52200	1.318	0.261	0.0054		0.690449	2.61785	0.109533
52400	1.326	0.2621	0.0053		0.69464	2.62889	0.107505
52600	1.334	0.2629	0.0053		0.698831	2.63691	0.107505
52800	1.342	0.2641	0.0054		0.703022	2.64895	0.109533
53000	1.348	0.265	0.0054		0.706165	2.65797	0.109533
53200	1.356	0.266	0.0054		0.710356	2.668	0.109533
53400	1.362	0.2669	0.0054		0.713499	2.67703	0.109533
53600	1.372	0.2679	0.0055		0.718738	2.68706	0.111562
53800	1.38	0.269	0.0055		0.722929	2.69809	0.111562
54000	1.386	0.27	0.0055		0.726072	2.70812	0.111562
54200	1.396	0.271	0.0055		0.73131	2.71815	0.111562
54400	1.404	0.2721	0.0055		0.735501	2.72919	0.111562
54600	1.414	0.2732	0.0056		0.74074	2.74022	0.11359
54800	1.42	0.2741	0.0055		0.743883	2.74925	0.111562
55000	1.428	0.2752	0.0056		0.748074	2.76028	0.11359
55200	1.436	0.2761	0.0056		0.752265	2.76931	0.11359
55400	1.446	0.2771	0.0056		0.757503	2.77934	0.11359
55600	1.452	0.2781	0.0056		0.760647	2.78937	0.11359
55800	1.464	0.2791	0.0056		0.766933	2.7994	0.11359
56000	1.47	0.2801	0.0056		0.770076	2.80943	0.11359
56200	1.476	0.2812	0.0056		0.773219	2.82046	0.11359
56400	1.486	0.2822	0.0056		0.778458	2.83049	0.11359
56600	1.49	0.2831	0.0056		0.780553	2.83952	0.11359
56800	1.5	0.2842	0.0057		0.785792	2.85055	0.115619
57000	1.508	0.285	0.0057		0.789983	2.85858	0.115619
57200	1.516	0.2862	0.0057		0.794174	2.87061	0.115619
57400	1.52	0.2872	0.0057		0.796269	2.88064	0.115619
57600	1.532	0.288	0.0057		0.802555	2.88867	0.115619
57800	1.538	0.289	0.0057		0.805699	2.8987	0.115619
58000	1.546	0.2899	0.0057		0.80989	2.90772	0.115619
58200	1.558	0.291	0.0057		0.816176	2.91876	0.115619
58400	1.568	0.2921	0.0058		0.821414	2.92979	0.117647
58600	1.576	0.2931	0.0057		0.825605	2.93982	0.115619
58800	1.584	0.2941	0.0058		0.829796	2.94985	0.117647
59000	1.594	0.2951	0.0058		0.835035	2.95988	0.117647
59200	1.602	0.2962	0.0058		0.839226	2.97091	0.117647
59400	1.61	0.2971	0.0058		0.843417	2.97994	0.117647
59600	1.618	0.298	0.0059		0.847608	2.98897	0.119675
59800	1.624	0.299	0.0059		0.850751	2.999	0.119675
60000	1.634	0.3001	0.0059		0.855989	3.01003	0.119675
60200	1.642	0.301	0.0059		0.86018	3.01906	0.119675
60400	1.652	0.302	0.006		0.865419	3.02909	0.121704
60600	1.662	0.303	0.006		0.870657	3.03912	0.121704
60800	1.668	0.304	0.006		0.873801	3.04915	0.121704
61000	1.676	0.3049	0.006		0.877991	3.05817	0.121704
61200	1.684	0.3059	0.006		0.882182	3.0682	0.121704
61400	1.692	0.3069	0.0061		0.886373	3.07823	0.123732
61600	1.704	0.3079	0.0061		0.89266	3.08826	0.123732
61800	1.714	0.309	0.0062		0.897898	3.0993	0.125761
62000	1.724	0.31	0.0062		0.903137	3.10933	0.125761
62200	1.734	0.3111	0.0062		0.908375	3.12036	0.125761
62400	1.742	0.3121	0.0062		0.912566	3.13039	0.125761
62600	1.75	0.3131	0.0063		0.916757	3.14042	0.127789
62800	1.756	0.314	0.0063		0.9199	3.14945	0.127789
63000	1.768	0.315	0.0065		0.926187	3.15948	0.131846
63200	1.78	0.316	0.0065		0.932473	3.16951	0.131846
63400	1.788	0.317	0.0064		0.936664	3.17954	0.129817
63600	1.798	0.3179	0.0065		0.941903	3.18857	0.131846
63800	1.81	0.319	0.0065		0.948189	3.1996	0.131846
64000	1.818	0.3201	0.0065		0.95238	3.21063	0.131846
64200	1.826	0.3211	0.0066		0.956571	3.22066	0.133874
64400	1.836	0.3221	0.0066		0.961809	3.23069	0.133874
64600	1.844	0.323	0.0066		0.966	3.23972	0.133874
64800	1.856	0.324	0.0066		0.972286	3.24975	0.133874
65000	1.864	0.325	0.0066		0.976477	3.25978	0.133874
65200	1.87	0.3259	0.0067		0.979621	3.26881	0.135903
65400	1.884	0.327	0.0066		0.986955	3.27984	0.133874
65600	1.892	0.3279	0.0067		0.991145	3.28887	0.135903
65800	1.904	0.3289	0.0068		0.997432	3.2989	0.137931
66000	1.91	0.33	0.0068		1.00057	3.30993	0.137931
66200	1.922	0.3309	0.0068		1.00686	3.31896	0.137931
66400	1.934	0.332	0.0069		1.01315	3.32999	0.139959
66600	1.942	0.333	0.0068		1.01734	3.34002	0.137931
66800	1.948	0.3341	0.0069		1.02048	3.35105	0.139959
67000	1.96	0.3349	0.0069		1.02677	3.35908	0.139959
67200	1.97	0.3359	0.0069		1.03201	3.36911	0.139959
67400	1.98	0.3369	0.007		1.03725	3.37914	0.141988
67600	1.99	0.3378	0.007		1.04248	3.38816	0.141988
67800	1.998	0.3389	0.007		1.04667	3.3992	0.141988
68000	2.012	0.3399	0.0071		1.05401	3.40923	0.144016
68200	2.024	0.3409	0.0071		1.0603	3.41926	0.144016
68400	2.032	0.3419	0.0072		1.06449	3.42929	0.146045
68600	2.042	0.3429	0.0072		1.06972	3.43932	0.146045
68800	2.052	0.3438	0.0073		1.07496	3.44835	0.148073
69000	2.06	0.3448	0.0073		1.07915	3.45838	0.148073
69200	2.072	0.3458	0.0073		1.08544	3.46841	0.148073
69400	2.082	0.3469	0.0073		1.09068	3.47944	0.148073
69600	2.094	0.3478	0.0074		1.09697	3.48847	0.150101
69800	2.106	0.3491	0.0074		1.10325	3.5015	0.150101
70000	2.114	0.3499	0.0074		1.10744	3.50953	0.150101
70200	2.124	0.3509	0.0074		1.11268	3.51956	0.150101
70400	2.134	0.3519	0.0075		1.11792	3.52959	0.15213
70600	2.142	0.3528	0.0075		1.12211	3.53862	0.15213
70800	2.156	0.3539	0.0075		1.12944	3.54965	0.15213
71000	2.168	0.3549	0.0074		1.13573	3.55968	0.150101
71200	2.178	0.3559	0.0075		1.14097	3.56971	0.15213
71400	2.188	0.3569	0.0076		1.14621	3.57974	0.154158
71600	2.2	0.358	0.0075		1.15249	3.59077	0.15213
71800	2.21	0.3589	0.0076		1.15773	3.5998	0.154158
72000	2.222	0.36	0.0076		1.16402	3.61083	0.154158
72200	2.234	0.3609	0.0077		1.17031	3.61986	0.156187
72400	2.244	0.362	0.0077		1.17554	3.63089	0.156187
72600	2.254	0.3628	0.0077		1.18078	3.63892	0.156187
72800	2.266	0.3639	0.0077		1.18707	3.64995	0.156187
73000	2.274	0.3648	0.0078		1.19126	3.65898	0.158215
73200	2.282	0.3657	0.0078		1.19545	3.668	0.158215
73400	2.296	0.3668	0.0079		1.20279	3.67904	0.160243
73600	2.31	0.3679	0.0078		1.21012	3.69007	0.158215
73800	2.322	0.3687	0.0078		1.21641	3.69809	0.158215
74000	2.332	0.3698	0.0078		1.22164	3.70913	0.158215
74200	2.342	0.3709	0.0078		1.22688	3.72016	0.158215
74400	2.352	0.3718	0.0078		1.23212	3.72919	0.158215
74600	2.364	0.3729	0.0079		1.23841	3.74022	0.160243
74800	2.376	0.3738	0.0079		1.24469	3.74925	0.160243
75000	2.386	0.3749	0.0079		1.24993	3.76028	0.160243
75200	2.396	0.3759	0.008		1.25517	3.77031	0.162272
75400	2.408	0.3769	0.008		1.26146	3.78034	0.162272
75600	2.416	0.3779	0.008		1.26565	3.79037	0.162272
75800	2.432	0.3787	0.0081		1.27403	3.7984	0.1643
76000	2.44	0.3799	0.0081		1.27822	3.81043	0.1643
76200	2.45	0.3808	0.008		1.28346	3.81946	0.162272
76400	2.462	0.3819	0.008		1.28975	3.83049	0.162272
76600	2.476	0.3829	0.0081		1.29708	3.84052	0.1643
76800	2.486	0.384	0.0082		1.30232	3.85155	0.166329
77000	2.496	0.3849	0.0082		1.30756	3.86058	0.166329
77200	2.51	0.3858	0.0081		1.31489	3.86961	0.1643
77400	2.52	0.3869	0.0082		1.32013	3.88064	0.166329
77600	2.532	0.3879	0.0083		1.32642	3.89067	0.168357
77800	2.544	0.3889	0.0082		1.3327	3.9007	0.166329
78000	2.556	0.3899	0.0083		1.33899	3.91073	0.168357
78200	2.568	0.3909	0.0082		1.34528	3.92076	0.166329
78400	2.58	0.3919	0.0083		1.35156	3.93079	0.168357
78600	2.59	0.3927	0.0084		1.3568	3.93882	0.170385
78800	2.604	0.3937	0.0084		1.36413	3.94885	0.170385
79000	2.614	0.3948	0.0084		1.36937	3.95988	0.170385
79200	2.628	0.3958	0.0085		1.37671	3.96991	0.172414
79400	2.64	0.3968	0.0084		1.38299	3.97994	0.170385
79600	2.652	0.3978	0.0084		1.38928	3.98997	0.170385
79800	2.666	0.3988	0.0085		1.39661	4	0.172414
80000	2.674	0.3997	0.0085		1.4008	4.00903	0.172414
80200	2.688	0.4009	0.0085		1.40814	4.02106	0.172414
80400	2.7	0.4018	0.0086		1.41443	4.03009	0.174442
80600	2.714	0.4029	0.0086		1.42176	4.04112	0.174442
80800	2.726	0.4039	0.0087		1.42805	4.05115	0.176471
81000	2.736	0.4048	0.0086		1.43328	4.06018	0.174442
81200	2.75	0.4058	0.0086		1.44062	4.07021	0.174442
81400	2.764	0.4067	0.0087		1.44795	4.07924	0.176471
81600	2.778	0.4077	0.0087		1.45529	4.08927	0.176471
81800	2.788	0.4088	0.0087		1.46053	4.1003	0.176471
82000	2.8	0.4097	0.0087		1.46681	4.10933	0.176471
82200	2.812	0.4108	0.0087		1.4731	4.12036	0.176471
82400	2.826	0.4117	0.0088		1.48043	4.12939	0.178499
82600	2.838	0.4127	0.0088		1.48672	4.13942	0.178499
82800	2.848	0.4137	0.0088		1.49196	4.14945	0.178499
83000	2.864	0.4147	0.0089		1.50034	4.15948	0.180527
83200	2.876	0.4157	0.009		1.50662	4.16951	0.182556
83400	2.888	0.4166	0.009		1.51291	4.17854	0.182556
83600	2.904	0.4177	0.0091		1.52129	4.18957	0.184584
83800	2.918	0.4188	0.0091		1.52863	4.2006	0.184584
84000	2.93	0.4198	0.0091		1.53491	4.21063	0.184584
84200	2.942	0.4209	0.0092		1.5412	4.22166	0.186613
84400	2.956	0.4217	0.0091		1.54853	4.22969	0.184584
84600	2.966	0.4226	0.0091		1.55377	4.23872	0.184584
84800	2.978	0.4236	0.0092		1.56006	4.24875	0.186613
85000	2.992	0.4246	0.0092		1.56739	4.25878	0.186613
85200	3.004	0.4258	0.0093		1.57368	4.27081	0.188641
85400	3.018	0.4267	0.0093		1.58101	4.27984	0.188641
85600	3.03	0.4277	0.0092		1.5873	4.28987	0.186613
85800	3.036	0.4289	0.0093		1.59044	4.30191	0.188641
86000	3.046	0.4299	0.0093		1.59568	4.31194	0.188641
86200	3.058	0.4307	0.0093		1.60197	4.31996	0.188641
86400	3.074	0.4317	0.0094		1.61035	4.32999	0.190669
86600	3.084	0.4326	0.0095		1.61559	4.33902	0.192698
86800	3.098	0.4336	0.0094		1.62292	4.34905	0.190669
87000	3.114	0.4347	0.0094		1.6313	4.36008	0.190669
87200	3.128	0.4357	0.0095		1.63864	4.37011	0.192698
87400	3.142	0.4367	0.0095		1.64597	4.38014	0.192698
87600	3.156	0.4378	0.0096		1.65331	4.39117	0.194726
87800	3.168	0.4388	0.0096		1.65959	4.4012	0.194726
88000	3.178	0.4398	0.0096		1.66483	4.41123	0.194726
88200	3.194	0.4408	0.0096		1.67321	4.42126	0.194726
88400	3.214	0.4417	0.0097		1.68369	4.43029	0.196755
88600	3.228	0.4428	0.0098		1.69102	4.44132	0.198783
88800	3.238	0.4439	0.0098		1.69626	4.45236	0.198783
89000	3.25	0.4449	0.0098		1.70255	4.46239	0.198783
89200	3.262	0.4457	0.0099		1.70884	4.47041	0.200811
89400	3.278	0.4468	0.0099		1.71722	4.48144	0.200811
89600	3.29	0.4476	0.0099		1.7235	4.48947	0.200811
89800	3.304	0.4487	0.0099		1.73084	4.5005	0.200811
90000	3.318	0.4497	0.01		1.73817	4.51053	0.20284
90200	3.334	0.4507	0.01		1.74655	4.52056	0.20284
90400	3.346	0.4517	0.0101		1.75284	4.53059	0.204868
90600	3.36	0.4527	0.0102		1.76017	4.54062	0.206897
90800	3.372	0.4537	0.0102		1.76646	4.55065	0.206897
91000	3.39	0.4547	0.0102		1.77589	4.56068	0.206897
91200	3.402	0.4557	0.0102		1.78218	4.57071	0.206897
91400	3.414	0.4566	0.0104		1.78846	4.57974	0.210953
91600	3.43	0.4577	0.0104		1.79684	4.59077	0.210953
91800	3.446	0.4586	0.0104		1.80523	4.5998	0.210953
92000	3.46	0.4596	0.0105		1.81256	4.60983	0.212982
92200	3.476	0.4607	0.0106		1.82094	4.62086	0.21501
92400	3.486	0.4617	0.0105		1.82618	4.63089	0.212982
92600	3.504	0.4628	0.0106		1.83561	4.64193	0.21501
92800	3.52	0.4637	0.0107		1.84399	4.65095	0.217039
93000	3.532	0.4649	0.0107		1.85028	4.66299	0.217039
93200	3.546	0.4658	0.0107		1.85761	4.67202	0.217039
93400	3.56	0.4666	0.0107		1.86495	4.68004	0.217039
93600	3.574	0.4677	0.0108		1.87228	4.69107	0.219067
93800	3.588	0.4687	0.0108		1.87961	4.7011	0.219067
94000	3.604	0.4697	0.0109		1.888	4.71113	0.221095
94200	3.62	0.4707	0.0109		1.89638	4.72116	0.221095
94400	3.634	0.4718	0.011		1.90371	4.7322	0.223124
94600	3.652	0.4728	0.011		1.91314	4.74223	0.223124
94800	3.664	0.4738	0.011		1.91943	4.75226	0.223124
95000	3.68	0.4748	0.0111		1.92781	4.76229	0.225152
95200	3.694	0.4758	0.0111		1.93514	4.77232	0.225152
95400	3.71	0.4767	0.0112		1.94353	4.78134	0.227181
95600	3.726	0.4777	0.0112		1.95191	4.79137	0.227181
95800	3.744	0.4788	0.0112		1.96134	4.80241	0.227181
96000	3.758	0.4796	0.0114		1.96867	4.81043	0.231237
96200	3.774	0.4807	0.0113		1.97705	4.82146	0.229209
96400	3.79	0.4818	0.0114		1.98543	4.8325	0.231237
96600	3.802	0.4827	0.0114		1.99172	4.84152	0.231237
96800	3.818	0.4838	0.0114		2.0001	4.85256	0.231237
97000	3.834	0.4848	0.0114		2.00848	4.86259	0.231237
97200	3.846	0.4857	0.0114		2.01477	4.87161	0.231237
97400	3.864	0.4868	0.0115		2.0242	4.88265	0.233266
97600	3.878	0.4878	0.0115		2.03153	4.89268	0.233266
97800	3.896	0.4887	0.0115		2.04096	4.90171	0.233266
98000	3.91	0.4898	0.0116		2.0483	4.91274	0.235294
98200	3.924	0.4906	0.0117		2.05563	4.92076	0.237323
98400	3.94	0.4917	0.0116		2.06401	4.9318	0.235294
98600	3.958	0.4926	0.0117		2.07344	4.94082	0.237323
98800	3.97	0.4937	0.0117		2.07973	4.95186	0.237323
99000	3.99	0.4948	0.0118		2.09021	4.96289	0.239351
99200	4.002	0.4956	0.0119		2.09649	4.97091	0.241379
99400	4.014	0.4967	0.0119		2.10278	4.98195	0.241379
99600	4.032	0.4977	0.012		2.11221	4.99198	0.243408
99800	4.046	0.4986	0.012		2.11954	5.001	0.243408
100000	4.062	0.4997	0.012		2.12792	5.01204	0.243408
100200	4.076	0.5007	0.0121		2.13526	5.02207	0.245436
100400	4.092	0.5017	0.0121		2.14364	5.0321	0.245436
100600	4.108	0.5027	0.0122		2.15202	5.04213	0.247465
100800	4.124	0.5036	0.0122		2.1604	5.05115	0.247465
101000	4.138	0.5047	0.0122		2.16774	5.06219	0.247465
101200	4.154	0.5056	0.0123		2.17612	5.07121	0.249493
101400	4.172	0.5066	0.0123		2.18555	5.08124	0.249493
101600	4.188	0.5077	0.0124		2.19393	5.09228	0.251521
101800	4.204	0.5087	0.0125		2.20231	5.10231	0.25355
102000	4.22	0.5096	0.0126		2.21069	5.11133	0.255578
102200	4.238	0.5108	0.0126		2.22012	5.12337	0.255578
102400	4.254	0.5117	0.0125		2.22851	5.1324	0.25355
102600	4.268	0.5127	0.0126		2.23584	5.14243	0.255578
102800	4.282	0.5138	0.0126		2.24317	5.15346	0.255578
103000	4.298	0.5147	0.0127		2.25156	5.16249	0.257606
103200	4.314	0.5157	0.0127		2.25994	5.17252	0.257606
103400	4.332	0.5166	0.0127		2.26937	5.18154	0.257606
103600	4.346	0.5178	0.0128		2.2767	5.19358	0.259635
103800	4.364	0.5187	0.0128		2.28613	5.20261	0.259635
104000	4.384	0.5196	0.0128		2.29661	5.21163	0.259635
104200	4.402	0.5206	0.0129		2.30604	5.22166	0.261663
104400	4.418	0.5216	0.0129		2.31442	5.2317	0.261663
104600	4.434	0.5228	0.013		2.3228	5.24373	0.263692
104800	4.45	0.5237	0.013		2.33118	5.25276	0.263692
105000	4.466	0.5247	0.0131		2.33956	5.26279	0.26572
105200	4.484	0.5257	0.0132		2.34899	5.27282	0.267748
105400	4.5	0.5267	0.0133		2.35738	5.28285	0.269777
105600	4.514	0.5276	0.0133		2.36471	5.29188	0.269777
105800	4.532	0.5287	0.0133		2.37414	5.30291	0.269777
106000	4.55	0.5296	0.0134		2.38357	5.31194	0.271805
106200	4.568	0.5306	0.0134		2.393	5.32197	0.271805
106400	4.582	0.5316	0.0135		2.40033	5.332	0.273834
106600	4.6	0.5326	0.0135		2.40976	5.34203	0.273834
106800	4.614	0.5335	0.0136		2.4171	5.35105	0.275862
107000	4.63	0.5347	0.0137		2.42548	5.36309	0.27789
107200	4.642	0.5356	0.0139		2.43176	5.37212	0.281947
107400	4.658	0.5365	0.0138		2.44015	5.38114	0.279919
107600	4.678	0.5375	0.0139		2.45062	5.39117	0.281947
107800	4.696	0.5386	0.014		2.46005	5.40221	0.283976
108000	4.712	0.5397	0.014		2.46843	5.41324	0.283976
108200	4.73	0.5407	0.0141		2.47786	5.42327	0.286004
108400	4.744	0.5416	0.0142		2.4852	5.4323	0.288032
108600	4.762	0.5426	0.0142		2.49463	5.44233	0.288032
108800	4.782	0.5436	0.0143		2.5051	5.45236	0.290061
109000	4.796	0.5446	0.0144		2.51244	5.46239	0.292089
109200	4.818	0.5456	0.0144		2.52396	5.47242	0.292089
109400	4.836	0.5467	0.0145		2.53339	5.48345	0.294118
109600	4.852	0.5477	0.0145		2.54177	5.49348	0.294118
109800	4.87	0.5486	0.0146		2.5512	5.50251	0.296146
110000	4.888	0.5498	0.0146		2.56063	5.51454	0.296146
110200	4.906	0.5508	0.0147		2.57006	5.52457	0.298174
110400	4.92	0.5517	0.0147		2.5774	5.5336	0.298174
110600	4.94	0.5528	0.0148		2.58787	5.54463	0.300203
110800	4.956	0.5537	0.015		2.59626	5.55366	0.30426
111000	4.972	0.5545	0.0149		2.60464	5.56169	0.302231
111200	4.992	0.5556	0.015		2.61512	5.57272	0.30426
111400	5.008	0.5564	0.015		2.6235	5.58074	0.30426
111600	5.03	0.5576	0.0151		2.63502	5.59278	0.306288
111800	5.048	0.5587	0.0152		2.64445	5.60381	0.308316
112000	5.068	0.5596	0.0153		2.65493	5.61284	0.310345
112200	5.084	0.5607	0.0152		2.66331	5.62387	0.308316
112400	5.102	0.5617	0.0153		2.67274	5.6339	0.310345
112600	5.12	0.5626	0.0154		2.68217	5.64293	0.312373
112800	5.138	0.5638	0.0155		2.6916	5.65496	0.314402
113000	5.158	0.5647	0.0154		2.70208	5.66399	0.312373
113200	5.174	0.5657	0.0156		2.71046	5.67402	0.31643
113400	5.19	0.5667	0.0156		2.71884	5.68405	0.31643
113600	5.21	0.5675	0.0157		2.72932	5.69208	0.318458
113800	5.23	0.5685	0.0157		2.73979	5.70211	0.318458
114000	5.248	0.5695	0.0157		2.74922	5.71214	0.318458
114200	5.268	0.5705	0.0158		2.7597	5.72217	0.320487
114400	5.288	0.5717	0.0159		2.77018	5.7342	0.322515
114600	5.302	0.5727	0.0159		2.77751	5.74423	0.322515
114800	5.32	0.5737	0.0159		2.78694	5.75426	0.322515
115000	5.34	0.5745	0.016		2.79742	5.76229	0.324544
115200	5.356	0.5755	0.0161		2.8058	5.77232	0.326572
115400	5.376	0.5766	0.0162		2.81628	5.78335	0.3286
115600	5.396	0.5777	0.0162		2.82676	5.79438	0.3286
115800	5.414	0.5787	0.0162		2.83618	5.80441	0.3286
116000	5.43	0.5796	0.0163		2.84457	5.81344	0.330629
116200	5.446	0.5806	0.0163		2.85295	5.82347	0.330629
116400	5.466	0.5817	0.0164		2.86343	5.8345	0.332657
116600	5.486	0.5825	0.0165		2.8739	5.84253	0.334686
116800	5.502	0.5835	0.0165		2.88228	5.85256	0.334686
117000	5.52	0.5844	0.0165		2.89171	5.86158	0.334686
117200	5.54	0.5856	0.0165		2.90219	5.87362	0.334686
117400	5.56	0.5866	0.0166		2.91267	5.88365	0.336714
117600	5.578	0.5875	0.0166		2.9221	5.89268	0.336714
117800	5.598	0.5886	0.0168		2.93258	5.90371	0.340771
118000	5.62	0.5896	0.0168		2.9441	5.91374	0.340771
118200	5.638	0.5905	0.0168		2.95353	5.92277	0.340771
118400	5.658	0.5916	0.0169		2.96401	5.9338	0.342799
118600	5.678	0.5927	0.0169		2.97448	5.94483	0.342799
118800	5.696	0.5936	0.017		2.98391	5.95386	0.344828
119000	5.714	0.5946	0.017		2.99334	5.96389	0.344828
119200	5.732	0.5955	0.017		3.00277	5.97292	0.344828
119400	5.75	0.5963	0.0171		3.0122	5.98094	0.346856
119600	5.77	0.5974	0.0171		3.02268	5.99198	0.346856
119800	5.792	0.5984	0.0172		3.0342	6.00201	0.348884
120000	5.81	0.5995	0.0172		3.04363	6.01304	0.348884
120200	5.828	0.6005	0.0173		3.05306	6.02307	0.350913
120400	5.848	0.6015	0.0173		3.06354	6.0331	0.350913
120600	5.864	0.6024	0.0174		3.07192	6.04213	0.352941
120800	5.882	0.6033	0.0174		3.08135	6.05115	0.352941
121000	5.904	0.6044	0.0175		3.09288	6.06219	0.35497
121200	5.924	0.6055	0.0175		3.10335	6.07322	0.35497
121400	5.94	0.6065	0.0176		3.11174	6.08325	0.356998
121600	5.962	0.6076	0.0176		3.12326	6.09428	0.356998
121800	5.982	0.6084	0.0177		3.13374	6.10231	0.359026
122000	6.002	0.6095	0.0177		3.14422	6.11334	0.359026
122200	6.022	0.6105	0.0178		3.15469	6.12337	0.361055
122400	6.04	0.6114	0.0179		3.16412	6.1324	0.363083
122600	6.06	0.6125	0.0178		3.1746	6.14343	0.361055
122800	6.078	0.6135	0.0179		3.18403	6.15346	0.363083
123000	6.098	0.6144	0.018		3.19451	6.16249	0.365112
123200	6.12	0.6155	0.018		3.20603	6.17352	0.365112
123400	6.138	0.6163	0.0181		3.21546	6.18154	0.36714
123600	6.16	0.6174	0.0181		3.22699	6.19258	0.36714
123800	6.18	0.6184	0.0181		3.23746	6.20261	0.36714
124000	6.196	0.6195	0.0182		3.24584	6.21364	0.369168
124200	6.22	0.6204	0.0183		3.25842	6.22267	0.371197
124400	6.24	0.6213	0.0183		3.26889	6.2317	0.371197
124600	6.258	0.6223	0.0183		3.27832	6.24173	0.371197
124800	6.28	0.6234	0.0184		3.28985	6.25276	0.373225
125000	6.3	0.6245	0.0184		3.30033	6.26379	0.373225
125200	6.32	0.6254	0.0185		3.3108	6.27282	0.375254
125400	6.336	0.6263	0.0185		3.31918	6.28185	0.375254
125600	6.358	0.6273	0.0186		3.33071	6.29188	0.377282
125800	6.378	0.6284	0.0186		3.34119	6.30291	0.377282
126000	6.4	0.6294	0.0187		3.35271	6.31294	0.37931
126200	6.422	0.6303	0.0186		3.36424	6.32197	0.377282
126400	6.442	0.6314	0.0188		3.37471	6.333	0.381339
126600	6.462	0.6326	0.0188		3.38519	6.34504	0.381339
126800	6.484	0.6335	0.0189		3.39672	6.35406	0.383367
127000	6.506	0.6345	0.0189		3.40824	6.36409	0.383367
127200	6.526	0.6356	0.019		3.41872	6.37513	0.385396
127400	6.546	0.6367	0.019		3.4292	6.38616	0.385396
127600	6.564	0.6376	0.0191		3.43863	6.39519	0.387424
127800	6.586	0.6386	0.0192		3.45015	6.40522	0.389452
128000	6.606	0.6395	0.0192		3.46063	6.41424	0.389452
128200	6.626	0.6406	0.0193		3.4711	6.42528	0.391481
128400	6.642	0.6415	0.0194		3.47949	6.4343	0.393509
128600	6.664	0.6424	0.0194		3.49101	6.44333	0.393509
128800	6.682	0.6434	0.0195		3.50044	6.45336	0.395538
129000	6.702	0.6445	0.0196		3.51092	6.46439	0.397566
129200	6.726	0.6454	0.0196		3.52349	6.47342	0.397566
129400	6.744	0.6464	0.0197		3.53292	6.48345	0.399594
129600	6.768	0.6474	0.0198		3.54549	6.49348	0.401623
129800	6.788	0.6484	0.0199		3.55597	6.50351	0.403651
130000	6.804	0.6494	0.0199		3.56435	6.51354	0.403651
130200	6.822	0.6503	0.02		3.57378	6.52257	0.40568
130400	6.844	0.6515	0.02		3.58531	6.5346	0.40568
130600	6.87	0.6525	0.0202		3.59893	6.54463	0.409736
130800	6.888	0.6534	0.0202		3.60836	6.55366	0.409736
131000	6.91	0.6543	0.0203		3.61988	6.56269	0.411765
131200	6.93	0.6554	0.0203		3.63036	6.57372	0.411765
131400	6.952	0.6563	0.0204		3.64188	6.58275	0.413793
131600	6.974	0.6575	0.0205		3.65341	6.59478	0.415822
131800	6.996	0.6583	0.0206		3.66493	6.60281	0.41785
132000	7.016	0.6593	0.0206		3.67541	6.61284	0.41785
132200	7.038	0.6603	0.0208		3.68694	6.62287	0.421907
132400	7.06	0.6614	0.0208		3.69846	6.6339	0.421907
132600	7.082	0.6625	0.0209		3.70999	6.64493	0.423935
132800	7.1	0.6633	0.0209		3.71941	6.65296	0.423935
133000	7.124	0.6642	0.021		3.73199	6.66199	0.425963
133200	7.144	0.6654	0.021		3.74246	6.67402	0.425963
133400	7.166	0.6666	0.0211		3.75399	6.68606	0.427992
133600	7.184	0.6673	0.0212		3.76342	6.69308	0.43002
133800	7.204	0.6683	0.0212		3.7739	6.70311	0.43002
134000	7.23	0.6694	0.0213		3.78752	6.71414	0.432049
134200	7.254	0.6706	0.0213		3.80009	6.72618	0.432049
134400	7.274	0.6714	0.0214		3.81057	6.7342	0.434077
134600	7.298	0.6724	0.0215		3.82314	6.74423	0.436105
134800	7.318	0.6734	0.0216		3.83362	6.75426	0.438134
135000	7.336	0.6743	0.0216		3.84305	6.76329	0.438134
135200	7.362	0.6755	0.0216		3.85667	6.77533	0.438134
135400	7.382	0.6764	0.0218		3.86714	6.78435	0.442191
135600	7.402	0.6773	0.0219		3.87762	6.79338	0.444219
135800	7.422	0.6784	0.0219		3.8881	6.80441	0.444219
136000	7.448	0.6795	0.022		3.90172	6.81545	0.446247
136200	7.468	0.6804	0.0221		3.9122	6.82447	0.448276
136400	7.486	0.6814	0.0222		3.92163	6.8345	0.450304
136600	7.51	0.6823	0.0223		3.9342	6.84353	0.452333
136800	7.534	0.6834	0.0223		3.94677	6.85456	0.452333
137000	7.556	0.6843	0.0225		3.9583	6.86359	0.456389
137200	7.578	0.6853	0.0225		3.96982	6.87362	0.456389
137400	7.6	0.6863	0.0226		3.98135	6.88365	0.458418
137600	7.618	0.6873	0.0227		3.99078	6.89368	0.460446
137800	7.642	0.6883	0.0228		4.00335	6.90371	0.462475
138000	7.662	0.6893	0.0229		4.01382	6.91374	0.464503
138200	7.684	0.6904	0.0229		4.02535	6.92477	0.464503
138400	7.708	0.6913	0.023		4.03792	6.9338	0.466531
138600	7.73	0.6923	0.0231		4.04945	6.94383	0.46856
138800	7.748	0.6932	0.0232		4.05888	6.95286	0.470588
139000	7.776	0.6944	0.0233		4.07355	6.96489	0.472617
139200	7.8	0.6954	0.0234		4.08612	6.97492	0.474645
139400	7.822	0.6964	0.0236		4.09764	6.98495	0.478702
139600	7.844	0.6974	0.0237		4.10917	6.99498	0.48073
139800	7.866	0.6985	0.0237		4.12069	7.00602	0.48073
140000	7.888	0.6995	0.0238		4.13222	7.01605	0.482759
140200	7.908	0.7005	0.0239		4.14269	7.02608	0.484787
140400	7.932	0.7015	0.024		4.15527	7.03611	0.486815
140600	7.952	0.7024	0.0241		4.16574	7.04514	0.488844
140800	7.976	0.7035	0.0241		4.17832	7.05617	0.488844
141000	7.996	0.7046	0.0242		4.18879	7.0672	0.490872
141200	8.016	0.7054	0.0244		4.19927	7.07523	0.494929
141400	8.038	0.7063	0.0244		4.2108	7.08425	0.494929
141600	8.064	0.7075	0.0245		4.22442	7.09629	0.496957
141800	8.082	0.7084	0.0245		4.23385	7.10532	0.496957
142000	8.102	0.7093	0.0246		4.24432	7.11434	0.498986
142200	8.124	0.7102	0.0245		4.25585	7.12337	0.496957
142400	8.154	0.7114	0.0247		4.27156	7.13541	0.501014
142600	8.178	0.7123	0.0248		4.28414	7.14443	0.503043
142800	8.196	0.7134	0.0248		4.29357	7.15547	0.503043
143000	8.218	0.7144	0.0249		4.30509	7.1655	0.505071
143200	8.238	0.7153	0.025		4.31557	7.17452	0.507099
143400	8.262	0.7164	0.025		4.32814	7.18556	0.507099
143600	8.284	0.7174	0.0251		4.33967	7.19559	0.509128
143800	8.306	0.7184	0.0252		4.35119	7.20562	0.511156
144000	8.33	0.7195	0.0252		4.36376	7.21665	0.511156
144200	8.348	0.7204	0.0253		4.37319	7.22568	0.513185
144400	8.368	0.7213	0.0254		4.38367	7.2347	0.515213
144600	8.394	0.7223	0.0255		4.39729	7.24473	0.517241
144800	8.412	0.7232	0.0255		4.40672	7.25376	0.517241
145000	8.434	0.7242	0.0256		4.41825	7.26379	0.51927
145200	8.456	0.7252	0.0257		4.42977	7.27382	0.521298
145400	8.48	0.7262	0.0257		4.44234	7.28385	0.521298
145600	8.502	0.7272	0.0257		4.45387	7.29388	0.521298
145800	8.526	0.7283	0.0258		4.46644	7.30491	0.523327
146000	8.548	0.7292	0.0259		4.47797	7.31394	0.525355
146200	8.568	0.7302	0.026		4.48844	7.32397	0.527383
146400	8.594	0.7313	0.0261		4.50206	7.33501	0.529412
146600	8.614	0.7323	0.0261		4.51254	7.34504	0.529412
146800	8.638	0.7333	0.0262		4.52511	7.35507	0.53144
147000	8.658	0.7343	0.0262		4.53559	7.3651	0.53144
147200	8.684	0.7352	0.0264		4.54921	7.37412	0.535497
147400	8.71	0.7363	0.0264		4.56283	7.38516	0.535497
147600	8.732	0.7373	0.0265		4.57436	7.39519	0.537525
147800	8.756	0.7382	0.0265		4.58693	7.40421	0.537525
148000	8.792	0.7395	0.0266		4.60579	7.41725	0.539554
148200	8.816	0.7406	0.0267		4.61836	7.42828	0.541582
148400	8.84	0.7417	0.0268		4.63093	7.43932	0.543611
148600	8.858	0.7426	0.0268		4.64036	7.44835	0.543611
148800	8.88	0.7437	0.0269		4.65189	7.45938	0.545639
149000	8.904	0.7446	0.0269		4.66446	7.46841	0.545639
149200	8.924	0.7456	0.027		4.67494	7.47844	0.547667
149400	8.944	0.7467	0.0271		4.68542	7.48947	0.549696
149600	8.962	0.7476	0.0271		4.69484	7.4985	0.549696
149800	8.986	0.7485	0.0273		4.70742	7.50752	0.553753
150000	9.006	0.7514	0.0273		4.71789	7.53661	0.553753
150200	8.834	0.7489	0.0273		4.62779	7.51153	0.553753
150400	8.95	0.752	0.0273		4.68856	7.54263	0.553753
150600	8.922	0.752	0.0272		4.67389	7.54263	0.551724
150800	8.988	0.7537	0.0273		4.70846	7.55968	0.553753
151000	9	0.7544	0.0273		4.71475	7.5667	0.553753
151200	9.034	0.7555	0.0273		4.73256	7.57773	0.553753
151400	9.054	0.7563	0.0274		4.74304	7.58576	0.555781
151600	9.092	0.7575	0.0274		4.76295	7.59779	0.555781
151800	9.11	0.7584	0.0275		4.77238	7.60682	0.557809
152000	9.134	0.7594	0.0275		4.78495	7.61685	0.557809
152200	9.16	0.7605	0.0276		4.79857	7.62788	0.559838
152400	9.186	0.7614	0.0276		4.81219	7.63691	0.559838
152600	9.212	0.7624	0.0277		4.82581	7.64694	0.561866
152800	9.238	0.7635	0.0278		4.83943	7.65797	0.563895
153000	9.264	0.7645	0.0279		4.85305	7.668	0.565923
153200	9.282	0.7654	0.028		4.86248	7.67703	0.567951
153400	9.302	0.7664	0.0281		4.87296	7.68706	0.56998
153600	9.328	0.7674	0.0281		4.88658	7.69709	0.56998
153800	9.354	0.7685	0.0282		4.9002	7.70812	0.572008
154000	9.374	0.7694	0.0283		4.91068	7.71715	0.574037
154200	9.398	0.7705	0.0283		4.92325	7.72818	0.574037
154400	9.426	0.7714	0.0285		4.93792	7.73721	0.578093
154600	9.448	0.7725	0.0285		4.94944	7.74824	0.578093
154800	9.47	0.7735	0.0286		4.96097	7.75827	0.580122
155000	9.492	0.7744	0.0287		4.97249	7.7673	0.58215
155200	9.514	0.7755	0.0288		4.98402	7.77834	0.584178
155400	9.536	0.7764	0.0289		4.99554	7.78736	0.586207
155600	9.562	0.7775	0.029		5.00916	7.7984	0.588235
155800	9.586	0.7786	0.029		5.02173	7.80943	0.588235
156000	9.608	0.7796	0.0291		5.03326	7.81946	0.590264
156200	9.626	0.7806	0.0292		5.04269	7.82949	0.592292
156400	9.642	0.7814	0.0292		5.05107	7.83751	0.592292
156600	9.664	0.7824	0.0293		5.0626	7.84754	0.59432
156800	9.688	0.7835	0.0294		5.07517	7.85858	0.596349
157000	9.71	0.7844	0.0294		5.08669	7.8676	0.596349
157200	9.734	0.7854	0.0295		5.09927	7.87763	0.598377
157400	9.756	0.7863	0.0295		5.11079	7.88666	0.598377
157600	9.78	0.7873	0.0295		5.12336	7.89669	0.598377
157800	9.804	0.7883	0.0297		5.13594	7.90672	0.602434
158000	9.834	0.7893	0.0297		5.15165	7.91675	0.602434
158200	9.854	0.7904	0.0298		5.16213	7.92778	0.604462
158400	9.874	0.7914	0.0298		5.17261	7.93781	0.604462
158600	9.892	0.7924	0.0299		5.18204	7.94784	0.606491
158800	9.916	0.7933	0.03		5.19461	7.95687	0.608519
159000	9.94	0.7944	0.0301		5.20718	7.9679	0.610548
159200	9.96	0.7953	0.0301		5.21766	7.97693	0.610548
159400	9.984	0.7963	0.0301		5.23023	7.98696	0.610548
159600	10.012	0.7973	0.0303		5.2449	7.99699	0.614604
159800	10.036	0.7984	0.0304		5.25747	8.00802	0.616633
160000	10.062	0.7994	0.0305		5.27109	8.01805	0.618661
160200	10.084	0.8004	0.0306		5.28262	8.02808	0.62069
160400	10.106	0.8014	0.0306		5.29414	8.03811	0.62069
160600	10.13	0.8024	0.0308		5.30671	8.04814	0.624746
160800	10.15	0.8034	0.0308		5.31719	8.05817	0.624746
161000	10.176	0.8044	0.0309		5.33081	8.0682	0.626775
161200	10.208	0.8055	0.031		5.34758	8.07924	0.628803
161400	10.232	0.8066	0.0311		5.36015	8.09027	0.630832
161600	10.252	0.8076	0.0312		5.37063	8.1003	0.63286
161800	10.272	0.8085	0.0313		5.3811	8.10933	0.634888
162000	10.296	0.8095	0.0314		5.39368	8.11936	0.636917
162200	10.322	0.8106	0.0315		5.4073	8.13039	0.638945
162400	10.342	0.8115	0.0315		5.41777	8.13942	0.638945
162600	10.362	0.8124	0.0317		5.42825	8.14845	0.643002
162800	10.388	0.8135	0.0317		5.44187	8.15948	0.643002
163000	10.41	0.8145	0.0318		5.4534	8.16951	0.64503
163200	10.43	0.8152	0.0319		5.46387	8.17653	0.647059
163400	10.454	0.8164	0.032		5.47645	8.18857	0.649087
163600	10.478	0.8175	0.0321		5.48902	8.1996	0.651116
163800	10.504	0.8184	0.0321		5.50264	8.20863	0.651116
164000	10.526	0.8194	0.0322		5.51416	8.21866	0.653144
164200	10.552	0.8204	0.0323		5.52778	8.22869	0.655172
164400	10.574	0.8214	0.0324		5.53931	8.23872	0.657201
164600	10.598	0.8225	0.0325		5.55188	8.24975	0.659229
164800	10.618	0.8233	0.0326		5.56236	8.25777	0.661258
165000	10.642	0.8242	0.0327		5.57493	8.2668	0.663286
165200	10.668	0.8253	0.0328		5.58855	8.27783	0.665314
165400	10.692	0.8263	0.0328		5.60112	8.28786	0.665314
165600	10.716	0.8274	0.033		5.6137	8.2989	0.669371
165800	10.742	0.8285	0.033		5.62732	8.30993	0.669371
166000	10.762	0.8293	0.0331		5.63779	8.31795	0.6714
166200	10.788	0.8305	0.0331		5.65142	8.32999	0.6714
166400	10.81	0.8314	0.0332		5.66294	8.33902	0.673428
166600	10.832	0.8323	0.0333		5.67447	8.34804	0.675456
166800	10.854	0.8334	0.0334		5.68599	8.35908	0.677485
167000	10.874	0.8343	0.0335		5.69647	8.3681	0.679513
167200	10.898	0.8354	0.0335		5.70904	8.37914	0.679513
167400	10.922	0.8363	0.0336		5.72161	8.38816	0.681542
167600	10.942	0.8374	0.0338		5.73209	8.3992	0.685598
167800	10.968	0.8384	0.0338		5.74571	8.40923	0.685598
168000	10.986	0.8393	0.0339		5.75514	8.41825	0.687627
168200	11.012	0.8404	0.034		5.76876	8.42929	0.689655
168400	11.038	0.8414	0.0341		5.78238	8.43932	0.691684
168600	11.06	0.8422	0.0342		5.79391	8.44734	0.693712
168800	11.082	0.8434	0.0343		5.80543	8.45938	0.69574
169000	11.106	0.8443	0.0343		5.818	8.46841	0.69574
169200	11.126	0.8452	0.0344		5.82848	8.47743	0.697769
169400	11.146	0.8463	0.0345		5.83896	8.48847	0.699797
169600	11.168	0.8472	0.0346		5.85048	8.49749	0.701826
169800	11.192	0.8484	0.0347		5.86306	8.50953	0.703854
170000	11.22	0.8493	0.0348		5.87772	8.51856	0.705882
170200	11.246	0.8503	0.0348		5.89134	8.52859	0.705882
170400	11.27	0.8513	0.0349		5.90392	8.53862	0.707911
170600	11.29	0.8522	0.035		5.91439	8.54764	0.709939
170800	11.312	0.8532	0.0351		5.92592	8.55767	0.711968
171000	11.34	0.8543	0.0351		5.94059	8.56871	0.711968
171200	11.364	0.8554	0.0352		5.95316	8.57974	0.713996
171400	11.386	0.8562	0.0354		5.96468	8.58776	0.718053
171600	11.41	0.8573	0.0354		5.97726	8.5988	0.718053
171800	11.436	0.8585	0.0355		5.99088	8.61083	0.720081
172000	11.448	0.8592	0.0356		5.99716	8.61785	0.72211
172200	11.476	0.8603	0.0357		6.01183	8.62889	0.724138
172400	11.498	0.8612	0.0358		6.02336	8.63791	0.726166
172600	11.522	0.8623	0.0358		6.03593	8.64895	0.726166
172800	11.544	0.8631	0.0359		6.04745	8.65697	0.728195
173000	11.568	0.8642	0.036		6.06003	8.668	0.730223
173200	11.592	0.8652	0.036		6.0726	8.67803	0.730223
173400	11.62	0.8662	0.0362		6.08727	8.68806	0.73428
173600	11.642	0.8673	0.0363		6.09879	8.6991	0.736308
173800	11.666	0.8683	0.0364		6.11137	8.70913	0.738337
174000	11.688	0.8692	0.0365		6.12289	8.71815	0.740365
174200	11.714	0.8703	0.0366		6.13651	8.72919	0.742394
174400	11.736	0.8714	0.0366		6.14804	8.74022	0.742394
174600	11.76	0.8722	0.0367		6.16061	8.74824	0.744422
174800	11.782	0.8734	0.0368		6.17213	8.76028	0.74645
175000	11.806	0.8743	0.037		6.18471	8.76931	0.750507
175200	11.826	0.8753	0.037		6.19518	8.77934	0.750507
175400	11.848	0.8762	0.0371		6.20671	8.78837	0.752535
175600	11.874	0.8772	0.0372		6.22033	8.7984	0.754564
175800	11.898	0.8781	0.0373		6.2329	8.80742	0.756592
176000	11.924	0.8793	0.0374		6.24652	8.81946	0.758621
176200	11.944	0.8802	0.0374		6.257	8.82849	0.758621
176400	11.968	0.8813	0.0375		6.26957	8.83952	0.760649
176600	11.994	0.8822	0.0377		6.28319	8.84855	0.764706
176800	12.012	0.8833	0.0377		6.29262	8.85958	0.764706
177000	12.034	0.8842	0.0379		6.30415	8.86861	0.768763
177200	12.056	0.8853	0.0379		6.31567	8.87964	0.768763
177400	12.08	0.8862	0.038		6.32824	8.88867	0.770791
177600	12.102	0.8872	0.0381		6.33977	8.8987	0.772819
177800	12.122	0.8882	0.0382		6.35025	8.90873	0.774848
178000	12.146	0.8892	0.0383		6.36282	8.91876	0.776876
178200	12.172	0.8902	0.0384		6.37644	8.92879	0.778905
178400	12.194	0.8913	0.0384		6.38796	8.93982	0.778905
178600	12.22	0.8922	0.0385		6.40158	8.94885	0.780933
178800	12.242	0.8932	0.0387		6.41311	8.95888	0.78499
179000	12.262	0.8942	0.0387		6.42359	8.96891	0.78499
179200	12.286	0.8952	0.0387		6.43616	8.97894	0.78499
179400	12.308	0.8962	0.0388		6.44768	8.98897	0.787018
179600	12.334	0.8973	0.039		6.4613	9	0.791075
179800	12.358	0.8983	0.0391		6.47388	9.01003	0.793103
180000	12.378	0.8993	0.0392		6.48435	9.02006	0.795132
180200	12.4	0.9002	0.0393		6.49588	9.02909	0.79716
180400	12.42	0.9013	0.0394		6.50636	9.04012	0.799189
180600	12.44	0.9021	0.0395		6.51683	9.04814	0.801217
180800	12.468	0.9033	0.0396		6.5315	9.06018	0.803245
181000	12.49	0.9042	0.0397		6.54303	9.06921	0.805274
181200	12.51	0.9051	0.0398		6.5535	9.07823	0.807302
181400	12.534	0.9062	0.0399		6.56608	9.08927	0.809331
181600	12.556	0.907	0.0401		6.5776	9.09729	0.813387
181800	12.586	0.9082	0.0402		6.59332	9.10933	0.815416
182000	12.606	0.9092	0.0403		6.60379	9.11936	0.817444
182200	12.628	0.9101	0.0404		6.61532	9.12839	0.819473
182400	12.65	0.9112	0.0405		6.62684	9.13942	0.821501
182600	12.674	0.9121	0.0406		6.63942	9.14845	0.823529
182800	12.696	0.9132	0.0407		6.65094	9.15948	0.825558
183000	12.714	0.9143	0.0409		6.66037	9.17051	0.829615
183200	12.738	0.9153	0.0409		6.67294	9.18054	0.829615
183400	12.756	0.9162	0.041		6.68237	9.18957	0.831643
183600	12.778	0.9172	0.0411		6.6939	9.1996	0.833671
183800	12.8	0.9181	0.0412		6.70542	9.20863	0.8357
184000	12.822	0.9191	0.0413		6.71695	9.21866	0.837728
184200	12.844	0.9201	0.0414		6.72847	9.22869	0.839757
184400	12.866	0.9211	0.0415		6.74	9.23872	0.841785
184600	12.886	0.9221	0.0416		6.75048	9.24875	0.843813
184800	12.908	0.9231	0.0418		6.762	9.25878	0.84787
185000	12.928	0.9241	0.0419		6.77248	9.26881	0.849899
185200	12.952	0.9252	0.042		6.78505	9.27984	0.851927
185400	12.976	0.9261	0.0421		6.79762	9.28887	0.853955
185600	12.996	0.9272	0.0422		6.8081	9.2999	0.855984
185800	13.016	0.9283	0.0423		6.81858	9.31093	0.858012
186000	13.038	0.9293	0.0425		6.8301	9.32096	0.862069
186200	13.054	0.9302	0.0427		6.83848	9.32999	0.866126
186400	13.08	0.9312	0.0427		6.85211	9.34002	0.866126
186600	13.096	0.9322	0.0429		6.86049	9.35005	0.870183
186800	13.12	0.9333	0.043		6.87306	9.36108	0.872211
187000	13.142	0.9343	0.0432		6.88458	9.37111	0.876268
187200	13.16	0.9353	0.0433		6.89401	9.38114	0.878296
187400	13.182	0.9362	0.0433		6.90554	9.39017	0.878296
187600	13.204	0.9372	0.0434		6.91706	9.4002	0.880325
187800	13.222	0.9382	0.0436		6.92649	9.41023	0.884381
188000	13.242	0.939	0.0437		6.93697	9.41825	0.88641
188200	13.264	0.9401	0.0439		6.9485	9.42929	0.890467
188400	13.284	0.9412	0.0439		6.95897	9.44032	0.890467
188600	13.306	0.9421	0.044		6.9705	9.44935	0.892495
188800	13.324	0.9431	0.0441		6.97993	9.45938	0.894523
189000	13.34	0.944	0.0443		6.98831	9.46841	0.89858
189200	13.364	0.9452	0.0444		7.00088	9.48044	0.900609
189400	13.386	0.9461	0.0445		7.01241	9.48947	0.902637
189600	13.406	0.947	0.0446		7.02288	9.4985	0.904665
189800	13.422	0.9481	0.0448		7.03127	9.50953	0.908722
190000	13.448	0.949	0.0449		7.04489	9.51856	0.910751
190200	13.47	0.95	0.045		7.05641	9.52859	0.912779
190400	13.49	0.9511	0.0451		7.06689	9.53962	0.914807
190600	13.51	0.9522	0.0453		7.07737	9.55065	0.918864
190800	13.528	0.9531	0.0454		7.0868	9.55968	0.920892
191000	13.552	0.9541	0.0455		7.09937	9.56971	0.922921
191200	13.57	0.9551	0.0457		7.1088	9.57974	0.926978
191400	13.59	0.956	0.0458		7.11927	9.58877	0.929006
191600	13.612	0.957	0.0458		7.1308	9.5988	0.929006
191800	13.632	0.9581	0.0461		7.14128	9.60983	0.935091
192000	13.652	0.959	0.0462		7.15175	9.61886	0.93712
192200	13.672	0.9601	0.0463		7.16223	9.62989	0.939148
192400	13.692	0.9609	0.0463		7.17271	9.63791	0.939148
192600	13.71	0.962	0.0466		7.18214	9.64895	0.945233
192800	13.736	0.9631	0.0467		7.19576	9.65998	0.947262
193000	13.752	0.9639	0.0468		7.20414	9.668	0.94929
193200	13.77	0.9648	0.047		7.21357	9.67703	0.953347
193400	13.792	0.9658	0.0471		7.22509	9.68706	0.955375
193600	13.812	0.967	0.0473		7.23557	9.6991	0.959432
193800	13.836	0.968	0.0474		7.24814	9.70913	0.96146
194000	13.856	0.969	0.0475		7.25862	9.71916	0.963489
194200	13.87	0.97	0.0477		7.26596	9.72919	0.967546
194400	13.884	0.9709	0.0479		7.27329	9.73821	0.971602
194600	13.902	0.972	0.0481		7.28272	9.74925	0.975659
194800	13.916	0.973	0.0482		7.29005	9.75928	0.977688
195000	13.928	0.9739	0.0485		7.29634	9.7683	0.983773
195200	13.94	0.9751	0.049		7.30263	9.78034	0.993915
195400	13.952	0.976	0.0494		7.30891	9.78937	1.00203
195600	13.964	0.977	0.0497		7.3152	9.7994	1.00811
195800	13.986	0.978	0.05		7.32672	9.80943	1.0142
196000	14	0.9789	0.0504		7.33406	9.81846	1.02231
196200	14.02	0.9799	0.0506		7.34453	9.82849	1.02637
196400	14.036	0.9809	0.0509		7.35292	9.83852	1.03245
196600	14.056	0.9822	0.0511		7.36339	9.85155	1.03651
196800	14.076	0.9832	0.0514		7.37387	9.86158	1.0426
197000	14.09	0.9841	0.0516		7.38121	9.87061	1.04665
197200	14.108	0.9851	0.0519		7.39063	9.88064	1.05274
197400	14.124	0.986	0.0521		7.39902	9.88967	1.0568
197600	14.14	0.987	0.0523		7.4074	9.8997	1.06085
197800	14.156	0.988	0.0525		7.41578	9.90973	1.06491
198000	14.176	0.989	0.0529		7.42626	9.91976	1.07302
198200	14.196	0.99	0.0531		7.43673	9.92979	1.07708
198400	14.216	0.991	0.0534		7.44721	9.93982	1.08316
198600	14.23	0.9919	0.0536		7.45455	9.94885	1.08722
198800	14.254	0.9931	0.054		7.46712	9.96088	1.09533
199000	14.27	0.994	0.0543		7.4755	9.96991	1.10142
199200	14.23	0.9948	0.0561		7.45455	9.97793	1.13793
199400	14.242	0.9959	0.0567		7.46083	9.98897	1.1501
199600	14.26	0.997	0.057		7.47026	10	1.15619
199800	14.276	0.998	0.0573		7.47864	10.01	1.16227
200000	14.294	0.9991	0.0577		7.48807	10.0211	1.17039
200200	14.308	1	0.058		7.49541	10.0301	1.17647
200400	14.326	1.001	0.0582		7.50484	10.0401	1.18053
200600	14.342	1.0019	0.0585		7.51322	10.0491	1.18661
200800	14.364	1.003	0.0587		7.52474	10.0602	1.19067
201000	14.386	1.0039	0.0589		7.53627	10.0692	1.19473
201200	14.408	1.0048	0.0592		7.54779	10.0782	1.20081
201400	14.426	1.0059	0.0595		7.55722	10.0893	1.2069
201600	14.45	1.007	0.0597		7.5698	10.1003	1.21095
201800	14.47	1.008	0.0598		7.58027	10.1103	1.21298
202000	14.49	1.009	0.0601		7.59075	10.1204	1.21907
202200	14.512	1.0099	0.0603		7.60227	10.1294	1.22312
202400	14.528	1.0111	0.0605		7.61066	10.1414	1.22718
202600	14.544	1.0119	0.0607		7.61904	10.1494	1.23124
202800	14.564	1.0128	0.061		7.62952	10.1585	1.23732
203000	14.582	1.014	0.0611		7.63894	10.1705	1.23935
203200	14.602	1.0149	0.0614		7.64942	10.1795	1.24544
203400	14.62	1.0157	0.0615		7.65885	10.1876	1.24746
203600	14.642	1.0169	0.0618		7.67038	10.1996	1.25355
203800	14.662	1.018	0.062		7.68085	10.2106	1.25761
204000	14.682	1.019	0.0622		7.69133	10.2207	1.26166
204200	14.698	1.0199	0.0624		7.69971	10.2297	1.26572
204400	14.722	1.0209	0.0627		7.71229	10.2397	1.27181
204600	14.744	1.022	0.0629		7.72381	10.2508	1.27586
204800	14.76	1.023	0.0631		7.73219	10.2608	1.27992
205000	14.782	1.0241	0.0633		7.74372	10.2718	1.28398
205200	14.796	1.0251	0.0637		7.75105	10.2818	1.29209
205400	14.812	1.0259	0.064		7.75943	10.2899	1.29817
205600	14.832	1.027	0.0642		7.76991	10.3009	1.30223
205800	14.852	1.028	0.0644		7.78039	10.3109	1.30629
206000	14.872	1.0291	0.0647		7.79086	10.322	1.31237
206200	14.888	1.03	0.0649		7.79925	10.331	1.31643
206400	14.904	1.031	0.0651		7.80763	10.341	1.32049
206600	14.922	1.032	0.0653		7.81706	10.3511	1.32454
206800	14.944	1.033	0.0656		7.82858	10.3611	1.33063
207000	14.964	1.0339	0.0658		7.83906	10.3701	1.33469
207200	14.98	1.0348	0.0661		7.84744	10.3791	1.34077
207400	14.998	1.0359	0.0663		7.85687	10.3902	1.34483
207600	15.016	1.0368	0.0666		7.8663	10.3992	1.35091
207800	15.036	1.0378	0.0668		7.87678	10.4092	1.35497
208000	15.056	1.0389	0.067		7.88726	10.4203	1.35903
208200	15.076	1.0399	0.0673		7.89773	10.4303	1.36511
208400	15.092	1.041	0.0676		7.90611	10.4413	1.3712
208600	15.112	1.0419	0.0678		7.91659	10.4504	1.37525
208800	15.132	1.043	0.0681		7.92707	10.4614	1.38134
209000	15.148	1.0439	0.0682		7.93545	10.4704	1.38337
209200	15.168	1.0449	0.0683		7.94593	10.4804	1.3854
209400	15.186	1.0459	0.0685		7.95536	10.4905	1.38945
209600	15.208	1.047	0.0687		7.96688	10.5015	1.39351
209800	15.226	1.0479	0.0689		7.97631	10.5105	1.39757
210000	15.242	1.049	0.069		7.98469	10.5216	1.39959
210200	15.26	1.0501	0.0692		7.99412	10.5326	1.40365
210400	15.272	1.051	0.0695		8.00041	10.5416	1.40974
210600	15.29	1.0519	0.0697		8.00984	10.5507	1.41379
210800	15.306	1.0529	0.0698		8.01822	10.5607	1.41582
211000	15.326	1.054	0.07		8.0287	10.5717	1.41988
211200	15.344	1.0548	0.0702		8.03813	10.5797	1.42394
211400	15.362	1.0558	0.0704		8.04756	10.5898	1.42799
211600	15.378	1.0568	0.0706		8.05594	10.5998	1.43205
211800	15.398	1.0579	0.0708		8.06642	10.6108	1.43611
212000	15.412	1.0589	0.071		8.07375	10.6209	1.44016
212200	15.434	1.06	0.0713		8.08527	10.6319	1.44625
212400	15.448	1.0609	0.0714		8.09261	10.6409	1.44828
212600	15.47	1.0619	0.0717		8.10413	10.651	1.45436
212800	15.482	1.063	0.0719		8.11042	10.662	1.45842
213000	15.494	1.0639	0.0722		8.11671	10.671	1.4645
213200	15.51	1.0648	0.0723		8.12509	10.68	1.46653
213400	15.53	1.0659	0.0726		8.13557	10.6911	1.47262
213600	15.546	1.0669	0.0728		8.14395	10.7011	1.47667
213800	15.562	1.0679	0.0731		8.15233	10.7111	1.48276
214000	15.576	1.0688	0.0732		8.15966	10.7202	1.48479
214200	15.592	1.0699	0.074		8.16804	10.7312	1.50101
214400	15.61	1.0709	0.0743		8.17747	10.7412	1.5071
214600	15.622	1.0719	0.0746		8.18376	10.7513	1.51318
214800	15.638	1.0728	0.0748		8.19214	10.7603	1.51724
215000	15.65	1.0738	0.0752		8.19843	10.7703	1.52535
215200	15.666	1.0749	0.0754		8.20681	10.7813	1.52941
215400	15.682	1.0759	0.0758		8.21519	10.7914	1.53753
215600	15.696	1.0769	0.0761		8.22253	10.8014	1.54361
215800	15.712	1.0778	0.0763		8.23091	10.8104	1.54767
216000	15.728	1.0788	0.0766		8.23929	10.8205	1.55375
216200	15.744	1.0799	0.0769		8.24767	10.8315	1.55984
216400	15.758	1.0807	0.077		8.25501	10.8395	1.56187
216600	15.776	1.0819	0.0773		8.26444	10.8516	1.56795
216800	15.788	1.0829	0.0776		8.27072	10.8616	1.57404
217000	15.804	1.0839	0.0779		8.2791	10.8716	1.58012
217200	15.818	1.0849	0.0783		8.28644	10.8816	1.58824
217400	15.832	1.0858	0.0786		8.29377	10.8907	1.59432
217600	15.846	1.0868	0.0789		8.30111	10.9007	1.60041
217800	15.856	1.0877	0.0793		8.30634	10.9097	1.60852
218000	15.868	1.0888	0.0796		8.31263	10.9208	1.6146
218200	15.88	1.0898	0.08		8.31892	10.9308	1.62272
218400	15.892	1.0909	0.0804		8.3252	10.9418	1.63083
218600	15.9	1.0919	0.0809		8.32939	10.9519	1.64097
218800	15.91	1.0927	0.0813		8.33463	10.9599	1.64909
219000	15.926	1.0938	0.0817		8.34301	10.9709	1.6572
219200	15.938	1.0949	0.0821		8.3493	10.9819	1.66531
219400	15.948	1.0959	0.0826		8.35454	10.992	1.67546
219600	15.964	1.0968	0.0829		8.36292	11.001	1.68154
219800	15.98	1.0978	0.0833		8.3713	11.011	1.68966
220000	15.99	1.0988	0.0836		8.37654	11.0211	1.69574
220200	16.004	1.0998	0.0841		8.38388	11.0311	1.70588
220400	16.016	1.1007	0.0844		8.39016	11.0401	1.71197
220600	16.032	1.1017	0.0849		8.39854	11.0502	1.72211
220800	16.042	1.1028	0.0854		8.40378	11.0612	1.73225
221000	16.052	1.1039	0.0857		8.40902	11.0722	1.73834
221200	16.064	1.1048	0.0861		8.41531	11.0812	1.74645
221400	16.072	1.1056	0.0865		8.4195	11.0893	1.75456
221600	16.082	1.1066	0.0869		8.42474	11.0993	1.76268
221800	16.092	1.1078	0.0873		8.42998	11.1113	1.77079
222000	16.078	1.1088	0.0877		8.42264	11.1214	1.7789
222200	15.94	1.1104	0.0883		8.35035	11.1374	1.79108
222400	15.878	1.1109	0.0889		8.31787	11.1424	1.80325
222600	15.86	1.1116	0.0893		8.30844	11.1494	1.81136
222800	15.872	1.1127	0.0897		8.31473	11.1605	1.81947
223000	15.884	1.1138	0.09		8.32101	11.1715	1.82556
223200	15.9	1.1147	0.0903		8.32939	11.1805	1.83164
223400	15.918	1.116	0.0907		8.33882	11.1936	1.83976
223600	15.928	1.117	0.091		8.34406	11.2036	1.84584
223800	15.94	1.118	0.0914		8.35035	11.2136	1.85396
224000	15.938	1.119	0.092		8.3493	11.2237	1.86613
224200	15.944	1.1197	0.0925		8.35244	11.2307	1.87627
224400	15.954	1.1208	0.093		8.35768	11.2417	1.88641
224600	15.968	1.1218	0.0934		8.36502	11.2518	1.89452
224800	15.968	1.1227	0.0941		8.36502	11.2608	1.90872
225000	15.98	1.1238	0.0946		8.3713	11.2718	1.91886
225200	15.972	1.1248	0.0953		8.36711	11.2818	1.93306
225400	15.978	1.1259	0.0959		8.37026	11.2929	1.94523
225600	15.988	1.127	0.0967		8.37549	11.3039	1.96146
225800	16	1.128	0.0971		8.38178	11.3139	1.96957
226000	16.014	1.129	0.0977		8.38911	11.324	1.98174
226200	16.024	1.1299	0.0981		8.39435	11.333	1.98986
226400	16.034	1.1309	0.0986		8.39959	11.343	2
226600	16.044	1.1319	0.0991		8.40483	11.3531	2.01014
226800	16.052	1.1328	0.0995		8.40902	11.3621	2.01826
227000	16.066	1.1338	0.0999		8.41635	11.3721	2.02637
227200	16.076	1.135	0.1004		8.42159	11.3842	2.03651
227400	16.086	1.1359	0.1008		8.42683	11.3932	2.04462
227600	16.096	1.1369	0.1014		8.43207	11.4032	2.0568
227800	16.108	1.138	0.1018		8.43836	11.4142	2.06491
228000	16.108	1.139	0.1025		8.43836	11.4243	2.07911
228200	16.108	1.1399	0.103		8.43836	11.4333	2.08925
228400	16.112	1.1409	0.1035		8.44045	11.4433	2.09939
228600	16.12	1.1419	0.104		8.44464	11.4534	2.10953
228800	16.124	1.1428	0.1045		8.44674	11.4624	2.11968
229000	16.128	1.1438	0.1051		8.44883	11.4724	2.13185
229200	16.128	1.1447	0.1056		8.44883	11.4814	2.14199
229400	16.124	1.1458	0.1063		8.44674	11.4925	2.15619
229600	16.088	1.147	0.107		8.42788	11.5045	2.17039
229800	16.08	1.148	0.1075		8.42369	11.5145	2.18053
230000	16.084	1.1489	0.1081		8.42578	11.5236	2.1927
230200	16.02	1.1499	0.1112		8.39226	11.5336	2.25558
230400	15.988	1.1509	0.113		8.37549	11.5436	2.29209
230600	15.972	1.152	0.114		8.36711	11.5547	2.31237
230800	15.964	1.1529	0.115		8.36292	11.5637	2.33266
231000	15.962	1.1538	0.1157		8.36187	11.5727	2.34686
231200	15.84	1.1552	0.1376		8.29796	11.5868	2.79108
231400	15.736	1.1561	0.1546		8.24348	11.5958	3.1359
231600	15.676	1.1566	0.163		8.21205	11.6008	3.30629
231800	15.646	1.1576	0.1716		8.19633	11.6108	3.48073
232000	15.63	1.1588	0.1763		8.18795	11.6229	3.57606
232200	15.622	1.1598	0.1799		8.18376	11.6329	3.64909
232400	15.616	1.1609	0.183		8.18062	11.6439	3.71197
232600	15.604	1.1618	0.1893		8.17433	11.653	3.83976
232800	15.594	1.1628	0.1938		8.16909	11.663	3.93103
233000	15.568	1.164	0.198		8.15547	11.675	4.01623
233200	14.952	1.1643	0.2886		7.83277	11.678	5.85396
233400	14.034	1.1675	0.4803		7.35187	11.7101	9.74239
233600	13.6	1.1673	0.6352		7.12451	11.7081	12.8844
233800	13.578	1.1685	0.6468		7.11299	11.7202	13.1197
234000	13.512	1.1685	0.6511		7.07841	11.7202	13.2069
234200	13.536	1.1701	0.655		7.09099	11.7362	13.286
234400	13.498	1.1706	0.6593		7.07108	11.7412	13.3732
234600	13.44	1.172	0.6687		7.0407	11.7553	13.5639
234800	13.408	1.1728	0.6754		7.02393	11.7633	13.6998
235000	13.396	1.1738	0.6823		7.01765	11.7733	13.8398
235200	13.376	1.1748	0.6906		7.00717	11.7834	14.0081
235400	13.362	1.1759	0.698		6.99983	11.7944	14.1582
235600	13.358	1.1769	0.7043		6.99774	11.8044	14.286
235800	13.32	1.1777	0.715		6.97783	11.8124	14.503
236000	13.234	1.1791	0.7364		6.93278	11.8265	14.9371
236200	13.184	1.1798	0.7467		6.90659	11.8335	15.146
236400	12.944	1.1806	0.8084		6.78086	11.8415	16.3976
236506	11.934	1.1864	0.9073		6.25176	11.8997	18.4037
236706	11.286	1.1852	0.9482		5.9123	11.8877	19.2333
236906	11.204	1.1823	0.9544		5.86934	11.8586	19.359
237106	11.252	1.184	0.9586		5.89449	11.8756	19.4442
237306	11.278	1.1863	0.9585		5.90811	11.8987	19.4422
237506	11.376	1.1881	0.9585		5.95945	11.9168	19.4422
237706	11.276	1.1871	0.959		5.90706	11.9067	19.4523
237906	11.288	1.1886	0.9602		5.91335	11.9218	19.4767
238106	11.334	1.1898	0.9604		5.93744	11.9338	19.4807
238306	11.336	1.1904	0.9607		5.93849	11.9398	19.4868
238506	11.37	1.1918	0.9609		5.9563	11.9539	19.4909
238706	11.38	1.1923	0.9611		5.96154	11.9589	19.4949
238906	11.404	1.1935	0.9614		5.97411	11.9709	19.501
239106	11.426	1.1945	0.9615		5.98564	11.9809	19.503
239306	11.448	1.1956	0.9618		5.99716	11.992	19.5091
239506	11.468	1.1965	0.962		6.00764	12.001	19.5132
239706	11.488	1.1974	0.9622		6.01812	12.01	19.5172
239906	11.514	1.1986	0.9624		6.03174	12.0221	19.5213
240106	11.536	1.1996	0.9627		6.04326	12.0321	19.5274
240306	11.554	1.2006	0.9629		6.05269	12.0421	19.5314
240506	11.57	1.2015	0.9632		6.06107	12.0512	19.5375
240706	11.586	1.2025	0.9634		6.06946	12.0612	19.5416
240906	11.612	1.2036	0.9637		6.08308	12.0722	19.5477
241106	11.63	1.2046	0.964		6.09251	12.0822	19.5538
241306	11.648	1.2054	0.9642		6.10194	12.0903	19.5578
241506	11.67	1.2067	0.9644		6.11346	12.1033	19.5619
241706	11.688	1.2076	0.9646		6.12289	12.1123	19.5659
241906	11.708	1.2085	0.9648		6.13337	12.1214	19.57
242106	11.724	1.2094	0.9651		6.14175	12.1304	19.5761
242306	11.744	1.2105	0.9652		6.15223	12.1414	19.5781
242506	11.76	1.2114	0.9655		6.16061	12.1505	19.5842
242706	11.782	1.2125	0.9657		6.17213	12.1615	19.5882
242906	11.808	1.2135	0.966		6.18575	12.1715	19.5943
243106	11.824	1.2145	0.9662		6.19414	12.1815	19.5984
243306	11.838	1.2155	0.9665		6.20147	12.1916	19.6045
243506	11.858	1.2166	0.9667		6.21195	12.2026	19.6085
243706	11.872	1.2175	0.9669		6.21928	12.2116	19.6126
243906	11.892	1.2185	0.9672		6.22976	12.2217	19.6187
244106	11.912	1.2195	0.9673		6.24024	12.2317	19.6207
244306	11.928	1.2204	0.9676		6.24862	12.2407	19.6268
244506	11.944	1.2215	0.9678		6.257	12.2518	19.6308
244706	11.958	1.2225	0.968		6.26433	12.2618	19.6349
244906	11.968	1.2236	0.9682		6.26957	12.2728	19.6389
245106	11.984	1.2246	0.9685		6.27795	12.2828	19.645
245306	11.988	1.2255	0.9688		6.28005	12.2919	19.6511
245506	11.952	1.2262	0.8459		6.26119	12.2989	17.1582
245706	11.972	1.2274	0.8443		6.27167	12.3109	17.1258
245906	11.996	1.2285	0.8443		6.28424	12.322	17.1258
246106	12.006	1.2295	0.8445		6.28948	12.332	17.1298
246306	12.018	1.2304	0.8447		6.29576	12.341	17.1339
246506	12.036	1.2315	0.8449		6.30519	12.3521	17.1379
246706	12.058	1.2325	0.845		6.31672	12.3621	17.14
246906	12.07	1.2336	0.8452		6.32301	12.3731	17.144
247106	12.084	1.2344	0.8454		6.33034	12.3811	17.1481
247306	12.106	1.2356	0.8456		6.34186	12.3932	17.1521
247506	12.122	1.2366	0.8458		6.35025	12.4032	17.1562
247706	12.136	1.2376	0.846		6.35758	12.4132	17.1602
247906	12.152	1.2385	0.8462		6.36596	12.4223	17.1643
248106	12.164	1.2394	0.8464		6.37225	12.4313	17.1684
248306	12.18	1.2404	0.8466		6.38063	12.4413	17.1724
248506	12.196	1.2414	0.8468		6.38901	12.4514	17.1765
248706	12.212	1.2424	0.847		6.39739	12.4614	17.1805
248906	12.228	1.2434	0.8472		6.40578	12.4714	17.1846
249106	12.246	1.2445	0.8475		6.4152	12.4824	17.1907
249306	12.262	1.2455	0.8477		6.42359	12.4925	17.1947
249506	12.278	1.2465	0.848		6.43197	12.5025	17.2008
249706	12.298	1.2475	0.8483		6.44245	12.5125	17.2069
249906	12.31	1.2485	0.8485		6.44873	12.5226	17.211
250106	12.326	1.2496	0.8489		6.45711	12.5336	17.2191
250306	12.342	1.2504	0.8491		6.4655	12.5416	17.2231
250506	12.358	1.2515	0.8495		6.47388	12.5527	17.2312
250706	12.37	1.2524	0.8498		6.48016	12.5617	17.2373
250906	12.386	1.2534	0.8501		6.48855	12.5717	17.2434
251106	12.398	1.2546	0.8506		6.49483	12.5838	17.2535
251306	12.412	1.2555	0.8509		6.50217	12.5928	17.2596
251506	12.424	1.2564	0.8513		6.50845	12.6018	17.2677
251706	12.44	1.2574	0.8517		6.51683	12.6118	17.2759
251906	12.45	1.2584	0.852		6.52207	12.6219	17.2819
252106	12.466	1.2595	0.8524		6.53045	12.6329	17.2901
252306	12.478	1.2604	0.8528		6.53674	12.6419	17.2982
252506	12.49	1.2616	0.8533		6.54303	12.654	17.3083
252706	12.498	1.2625	0.8538		6.54722	12.663	17.3185
252906	12.514	1.2634	0.8542		6.5556	12.672	17.3266
253106	12.526	1.2645	0.8547		6.56189	12.683	17.3367
253306	12.542	1.2655	0.8551		6.57027	12.6931	17.3448
253506	12.558	1.2664	0.8554		6.57865	12.7021	17.3509
253706	12.572	1.2674	0.8559		6.58598	12.7121	17.3611
253906	12.584	1.2685	0.8563		6.59227	12.7232	17.3692
254106	12.598	1.2694	0.8567		6.5996	12.7322	17.3773
254306	12.612	1.2704	0.8572		6.60694	12.7422	17.3874
254506	12.62	1.2715	0.8576		6.61113	12.7533	17.3955
254706	12.632	1.2725	0.858		6.61742	12.7633	17.4037
254906	12.638	1.2734	0.8585		6.62056	12.7723	17.4138
255106	12.654	1.2744	0.8588		6.62894	12.7823	17.4199
255306	12.664	1.2754	0.8592		6.63418	12.7924	17.428
255506	12.674	1.2763	0.8596		6.63942	12.8014	17.4361
255706	12.69	1.2773	0.86		6.6478	12.8114	17.4442
255906	12.702	1.2785	0.8603		6.65409	12.8235	17.4503
256106	12.714	1.2793	0.8607		6.66037	12.8315	17.4584
256306	12.726	1.2803	0.8611		6.66666	12.8415	17.4665
256506	12.74	1.2814	0.8616		6.67399	12.8526	17.4767
256706	12.75	1.2824	0.8621		6.67923	12.8626	17.4868
256906	12.762	1.2834	0.8624		6.68552	12.8726	17.4929
257106	12.776	1.2844	0.8628		6.69285	12.8826	17.501
257306	12.784	1.2853	0.8633		6.69704	12.8917	17.5112
257506	12.794	1.2863	0.8637		6.70228	12.9017	17.5193
257706	12.806	1.2873	0.8642		6.70857	12.9117	17.5294
257906	12.816	1.2883	0.8647		6.71381	12.9218	17.5396
258106	12.826	1.2894	0.8651		6.71904	12.9328	17.5477
258306	12.838	1.2904	0.8656		6.72533	12.9428	17.5578
258506	12.848	1.2914	0.8661		6.73057	12.9529	17.568
258706	12.854	1.2924	0.8665		6.73371	12.9629	17.5761
258906	12.86	1.2935	0.867		6.73686	12.9739	17.5862
259106	12.864	1.2944	0.8675		6.73895	12.9829	17.5963
259306	12.87	1.2954	0.8681		6.74209	12.993	17.6085
259506	12.88	1.2963	0.8685		6.74733	13.002	17.6166
259706	12.89	1.2973	0.8689		6.75257	13.012	17.6247
259906	12.904	1.2983	0.8694		6.75991	13.0221	17.6349
260106	12.914	1.2994	0.8698		6.76514	13.0331	17.643
260306	12.928	1.3003	0.8704		6.77248	13.0421	17.6552
260506	12.938	1.3015	0.8709		6.77772	13.0542	17.6653
260706	12.946	1.3023	0.8714		6.78191	13.0622	17.6755
260906	12.958	1.3033	0.8718		6.78819	13.0722	17.6836
261106	12.97	1.3042	0.8723		6.79448	13.0812	17.6937
261306	12.978	1.3054	0.8727		6.79867	13.0933	17.7018
261506	12.988	1.3063	0.8731		6.80391	13.1023	17.7099
261706	13	1.3074	0.8736		6.8102	13.1133	17.7201
261906	13.014	1.3083	0.8742		6.81753	13.1224	17.7323
262106	13.026	1.3092	0.8747		6.82382	13.1314	17.7424
262306	13.036	1.3103	0.8751		6.82906	13.1424	17.7505
262506	13.052	1.3113	0.8755		6.83744	13.1525	17.7586
262706	13.062	1.3123	0.8759		6.84268	13.1625	17.7667
262906	13.076	1.3134	0.8764		6.85001	13.1735	17.7769
263106	13.086	1.3143	0.8767		6.85525	13.1825	17.783
263306	13.096	1.3154	0.8772		6.86049	13.1936	17.7931
263506	13.106	1.3162	0.8777		6.86573	13.2016	17.8032
263706	13.112	1.3174	0.8782		6.86887	13.2136	17.8134
263906	13.116	1.3183	0.8787		6.87096	13.2227	17.8235
264106	13.126	1.3192	0.8792		6.8762	13.2317	17.8337
264306	13.138	1.3203	0.8798		6.88249	13.2427	17.8458
264506	13.142	1.3214	0.8803		6.88458	13.2538	17.856
264706	13.148	1.3223	0.8809		6.88773	13.2628	17.8682
264906	13.156	1.3233	0.8814		6.89192	13.2728	17.8783
265106	13.164	1.3242	0.8819		6.89611	13.2818	17.8884
265306	13.172	1.3254	0.8826		6.9003	13.2939	17.9026
265506	13.176	1.3264	0.8833		6.9024	13.3039	17.9168
265706	13.154	1.3272	0.8847		6.89087	13.3119	17.9452
265906	13.156	1.3283	0.8855		6.89192	13.323	17.9615
266106	13.164	1.3294	0.8861		6.89611	13.334	17.9736
266306	13.168	1.3303	0.8867		6.89821	13.343	17.9858
266506	13.178	1.3313	0.8872		6.90344	13.3531	17.9959
266706	13.188	1.3323	0.8877		6.90868	13.3631	18.0061
266906	13.194	1.3333	0.8881		6.91183	13.3731	18.0142
267106	13.21	1.3344	0.8886		6.92021	13.3842	18.0243
267306	13.222	1.3352	0.8891		6.92649	13.3922	18.0345
267506	13.23	1.3363	0.8897		6.93068	13.4032	18.0467
267706	13.244	1.3374	0.8902		6.93802	13.4142	18.0568
267906	13.256	1.3383	0.8908		6.9443	13.4233	18.069
268106	13.264	1.3393	0.8915		6.9485	13.4333	18.0832
268306	13.274	1.3401	0.892		6.95373	13.4413	18.0933
268506	13.286	1.3413	0.8925		6.96002	13.4534	18.1034
268706	13.298	1.3422	0.893		6.96631	13.4624	18.1136
268906	13.302	1.3432	0.8937		6.9684	13.4724	18.1278
269106	13.31	1.3444	0.8943		6.97259	13.4845	18.14
269306	13.264	1.3454	0.8957		6.9485	13.4945	18.1684
269506	13.254	1.3463	0.8965		6.94326	13.5035	18.1846
269706	13.254	1.3474	0.8969		6.94326	13.5145	18.1927
269906	13.246	1.3483	0.8976		6.93907	13.5236	18.2069
270106	13.256	1.3494	0.8981		6.9443	13.5346	18.217
270306	13.26	1.3503	0.8987		6.9464	13.5436	18.2292
270506	13.264	1.3512	0.8993		6.9485	13.5527	18.2414
270706	13.27	1.3522	0.9		6.95164	13.5627	18.2556
270906	13.274	1.3532	0.9006		6.95373	13.5727	18.2677
271106	13.29	1.3543	0.9012		6.96212	13.5838	18.2799
271306	13.3	1.3553	0.9019		6.96735	13.5938	18.2941
271506	13.31	1.3562	0.9024		6.97259	13.6028	18.3043
271706	13.32	1.3574	0.903		6.97783	13.6148	18.3164
271906	13.322	1.3583	0.9036		6.97888	13.6239	18.3286
272106	13.334	1.3592	0.9043		6.98517	13.6329	18.3428
272306	13.344	1.3602	0.9048		6.9904	13.6429	18.3529
272506	13.348	1.3611	0.9054		6.9925	13.652	18.3651
272706	13.352	1.3623	0.9059		6.9946	13.664	18.3753
272906	13.362	1.3632	0.9065		6.99983	13.673	18.3874
273106	13.362	1.3642	0.9073		6.99983	13.683	18.4037
273306	13.36	1.3655	0.9079		6.99879	13.6961	18.4158
273506	13.358	1.3663	0.9085		6.99774	13.7041	18.428
273706	13.244	1.3678	0.9095		6.93802	13.7192	18.4483
273906	13.192	1.3679	0.9095		6.91078	13.7202	18.4483
274106	13.198	1.369	0.9099		6.91392	13.7312	18.4564
274306	13.212	1.3704	0.9105		6.92125	13.7452	18.4686
274506	13.21	1.3714	0.9111		6.92021	13.7553	18.4807
274706	13.208	1.3723	0.9116		6.91916	13.7643	18.4909
274906	13.2	1.3734	0.9123		6.91497	13.7753	18.5051
275106	13.192	1.3743	0.9132		6.91078	13.7844	18.5233
275306	13.188	1.3752	0.914		6.90868	13.7934	18.5396
275506	13.188	1.3761	0.9148		6.90868	13.8024	18.5558
275706	13.192	1.3773	0.9155		6.91078	13.8144	18.57
275906	13.194	1.3782	0.9162		6.91183	13.8235	18.5842
276106	13.192	1.3794	0.9168		6.91078	13.8355	18.5963
276306	13.196	1.3802	0.9175		6.91287	13.8435	18.6105
276506	13.2	1.3814	0.918		6.91497	13.8556	18.6207
276706	13.2	1.3824	0.9186		6.91497	13.8656	18.6329
276906	13.126	1.384	0.9198		6.8762	13.8816	18.6572
277106	13.076	1.3837	0.9199		6.85001	13.8786	18.6592
277306	13.144	1.3856	0.9204		6.88563	13.8977	18.6694
277506	13.132	1.3861	0.9208		6.87935	13.9027	18.6775
277706	13.142	1.3871	0.9212		6.88458	13.9127	18.6856
277906	13.152	1.3884	0.9219		6.88982	13.9258	18.6998
278106	13.146	1.3894	0.9225		6.88668	13.9358	18.712
278306	13.154	1.3902	0.9229		6.89087	13.9438	18.7201
278506	13.166	1.3913	0.9234		6.89716	13.9549	18.7302
278706	13.174	1.3922	0.9239		6.90135	13.9639	18.7404
278906	13.184	1.3931	0.9243		6.90659	13.9729	18.7485
279106	13.196	1.3941	0.9248		6.91287	13.9829	18.7586
279306	13.208	1.3952	0.9254		6.91916	13.994	18.7708
279506	13.218	1.3962	0.926		6.9244	14.004	18.783
279706	13.226	1.3973	0.9265		6.92859	14.015	18.7931
279906	13.234	1.3983	0.9271		6.93278	14.0251	18.8053
280106	13.236	1.3992	0.9277		6.93383	14.0341	18.8174
280306	13.248	1.4002	0.9282		6.94011	14.0441	18.8276
280506	13.254	1.4013	0.9289		6.94326	14.0552	18.8418
280706	13.262	1.4023	0.9295		6.94745	14.0652	18.854
280906	13.26	1.4031	0.9301		6.9464	14.0732	18.8661
281106	13.268	1.4041	0.9308		6.95059	14.0832	18.8803
281306	13.276	1.4052	0.9316		6.95478	14.0943	18.8966
281506	13.286	1.4063	0.9324		6.96002	14.1053	18.9128
281706	13.29	1.4072	0.9329		6.96212	14.1143	18.9229
281906	13.3	1.4082	0.9336		6.96735	14.1244	18.9371
282106	13.302	1.4091	0.9342		6.9684	14.1334	18.9493
282306	13.304	1.4101	0.9348		6.96945	14.1434	18.9615
282506	13.32	1.4113	0.9354		6.97783	14.1555	18.9736
282706	13.324	1.4122	0.9362		6.97993	14.1645	18.9899
282906	13.33	1.4131	0.9368		6.98307	14.1735	19.002
283106	13.338	1.4142	0.9373		6.98726	14.1846	19.0122
283306	13.348	1.4152	0.938		6.9925	14.1946	19.0264
283506	13.354	1.4163	0.9386		6.99564	14.2056	19.0385
283706	13.366	1.4174	0.9393		7.00193	14.2166	19.0527
283906	13.368	1.4183	0.9399		7.00298	14.2257	19.0649
284106	13.38	1.4192	0.9405		7.00926	14.2347	19.0771
284306	13.39	1.4201	0.9411		7.0145	14.2437	19.0892
284506	13.398	1.4213	0.9417		7.01869	14.2558	19.1014
284706	13.402	1.4222	0.9423		7.02079	14.2648	19.1136
284906	13.412	1.4232	0.9429		7.02603	14.2748	19.1258
285106	13.42	1.4243	0.9435		7.03022	14.2859	19.1379
285306	13.43	1.4252	0.9441		7.03546	14.2949	19.1501
285506	13.434	1.4261	0.9447		7.03755	14.3039	19.1623
285706	13.44	1.4272	0.9454		7.0407	14.3149	19.1765
285906	13.448	1.4283	0.9461		7.04489	14.326	19.1907
286106	13.45	1.4292	0.9468		7.04593	14.335	19.2049
286306	13.426	1.4304	0.9478		7.03336	14.347	19.2252
286506	13.416	1.4311	0.9484		7.02812	14.3541	19.2373
286706	13.416	1.4321	0.9491		7.02812	14.3641	19.2515
286906	13.424	1.4331	0.9497		7.03231	14.3741	19.2637
287106	13.426	1.4342	0.9504		7.03336	14.3852	19.2779
287306	13.43	1.4351	0.9511		7.03546	14.3942	19.2921
287506	13.438	1.4361	0.9517		7.03965	14.4042	19.3043
287706	13.444	1.4372	0.9524		7.04279	14.4152	19.3185
287906	13.45	1.4382	0.9531		7.04593	14.4253	19.3327
288106	13.45	1.4391	0.9537		7.04593	14.4343	19.3448
288306	13.444	1.4402	0.9545		7.04279	14.4453	19.3611
288506	13.42	1.4415	0.9555		7.03022	14.4584	19.3813
288706	13.044	1.4433	0.9569		6.83325	14.4764	19.4097
288906	12.832	1.444	0.958		6.72219	14.4835	19.432
289106	12.804	1.4452	0.9594		6.70752	14.4955	19.4604
289306	12.708	1.4442	0.9602		6.65723	14.4855	19.4767
289506	12.694	1.4468	0.9607		6.64989	14.5115	19.4868
289706	12.716	1.4473	0.961		6.66142	14.5165	19.4929
289906	12.71	1.448	0.9616		6.65828	14.5236	19.5051
290106	12.724	1.4492	0.9622		6.66561	14.5356	19.5172
290306	12.736	1.4503	0.9629		6.6719	14.5466	19.5314
290506	12.74	1.4512	0.9639		6.67399	14.5557	19.5517
290706	12.748	1.4521	0.9648		6.67818	14.5647	19.57
290906	12.758	1.4532	0.9657		6.68342	14.5757	19.5882
291106	12.762	1.4542	0.9665		6.68552	14.5858	19.6045
291306	12.74	1.4551	0.9686		6.67399	14.5948	19.6471
291506	12.716	1.4562	0.9707		6.66142	14.6058	19.6897
291706	12.71	1.4571	0.972		6.65828	14.6148	19.716
291906	12.71	1.4582	0.9729		6.65828	14.6259	19.7343
292106	12.72	1.4595	0.9736		6.66352	14.6389	19.7485
292306	12.718	1.4601	0.9742		6.66247	14.6449	19.7606
292506	12.732	1.4612	0.9748		6.6698	14.656	19.7728
292706	12.732	1.4623	0.9755		6.6698	14.667	19.787
292906	12.688	1.4635	0.9766		6.64675	14.679	19.8093
293106	12.638	1.464	0.9777		6.62056	14.6841	19.8316
293306	12.618	1.4652	0.9784		6.61008	14.6961	19.8458
293506	12.606	1.4661	0.9789		6.60379	14.7051	19.856
293706	12.6	1.4673	0.9795		6.60065	14.7172	19.8682
293906	12.598	1.468	0.9802		6.5996	14.7242	19.8824
294106	12.608	1.4692	0.9809		6.60484	14.7362	19.8966
294306	12.606	1.4701	0.9817		6.60379	14.7452	19.9128
294506	12.612	1.4712	0.9827		6.60694	14.7563	19.9331
294706	12.616	1.4724	0.9836		6.60903	14.7683	19.9513
294906	12.612	1.4731	0.9845		6.60694	14.7753	19.9696
295106	12.616	1.4742	0.9853		6.60903	14.7864	19.9858
295306	12.616	1.4751	0.986		6.60903	14.7954	20
295506	12.618	1.4762	0.9867		6.61008	14.8064	20.0142
295706	12.626	1.4772	0.9873		6.61427	14.8164	20.0264
295906	12.63	1.4783	0.9881		6.61637	14.8275	20.0426
296106	12.634	1.4791	0.9887		6.61846	14.8355	20.0548
296306	12.636	1.4803	0.9895		6.61951	14.8475	20.071
296506	12.622	1.4812	0.9902		6.61218	14.8566	20.0852
296706	12.622	1.4821	0.9908		6.61218	14.8656	20.0974
296906	12.628	1.483	0.9914		6.61532	14.8746	20.1095
297106	12.64	1.4841	0.9922		6.62161	14.8857	20.1258
297306	12.648	1.4853	0.9929		6.6258	14.8977	20.14
297506	12.648	1.4859	0.9935		6.6258	14.9037	20.1521
297706	12.642	1.4873	0.9944		6.62265	14.9178	20.1704
297906	12.62	1.4882	0.9962		6.61113	14.9268	20.2069
298106	12.616	1.4892	0.9976		6.60903	14.9368	20.2353
298306	12.614	1.4901	0.9989		6.60799	14.9458	20.2617
298506	12.616	1.4912	0.9998		6.60903	14.9569	20.2799
298706	12.62	1.4921	1.0006		6.61113	14.9659	20.2961
298906	12.624	1.4933	1.0014		6.61322	14.9779	20.3124
299106	12.622	1.4941	1.0022		6.61218	14.986	20.3286
299306	12.63	1.4953	1.003		6.61637	14.998	20.3448
299506	12.638	1.4962	1.0039		6.62056	15.007	20.3631
299706	12.638	1.4971	1.0048		6.62056	15.016	20.3813
299906	12.642	1.498	1.0057		6.62265	15.0251	20.3996
300106	12.634	1.4993	1.0067		6.61846	15.0381	20.4199
300306	12.636	1.5002	1.0077		6.61951	15.0471	20.4402
300506	12.638	1.5012	1.0087		6.62056	15.0572	20.4604
300706	12.64	1.5022	1.0095		6.62161	15.0672	20.4767
300906	12.642	1.5031	1.0103		6.62265	15.0762	20.4929
301106	12.644	1.5042	1.0111		6.6237	15.0873	20.5091
301306	12.638	1.5051	1.0122		6.62056	15.0963	20.5314
301506	12.62	1.506	1.0142		6.61113	15.1053	20.572
301706	12.622	1.5073	1.0155		6.61218	15.1184	20.5984
301906	12.626	1.5081	1.0163		6.61427	15.1264	20.6146
302106	12.628	1.5091	1.0172		6.61532	15.1364	20.6329
302306	12.636	1.5101	1.0182		6.61951	15.1464	20.6531
302506	12.642	1.5112	1.0192		6.62265	15.1575	20.6734
302706	12.638	1.5121	1.0202		6.62056	15.1665	20.6937
302906	12.642	1.513	1.0213		6.62265	15.1755	20.716
303106	12.646	1.5141	1.0224		6.62475	15.1866	20.7383
303306	12.652	1.515	1.0234		6.62789	15.1956	20.7586
303506	12.656	1.5161	1.0246		6.62999	15.2066	20.783
303706	12.66	1.5171	1.0256		6.63208	15.2166	20.8032
303906	12.668	1.5181	1.027		6.63627	15.2267	20.8316
304106	12.67	1.519	1.028		6.63732	15.2357	20.8519
304306	12.658	1.5203	1.0293		6.63104	15.2487	20.8783
304506	12.634	1.5213	1.0307		6.61846	15.2588	20.9067
304706	12.628	1.522	1.0317		6.61532	15.2658	20.927
304906	12.636	1.5231	1.0328		6.61951	15.2768	20.9493
305106	12.636	1.5241	1.034		6.61951	15.2869	20.9736
305306	12.638	1.5252	1.0354		6.62056	15.2979	21.002
305506	12.642	1.5261	1.0367		6.62265	15.3069	21.0284
305706	12.642	1.5269	1.0379		6.62265	15.3149	21.0527
305906	12.65	1.528	1.0391		6.62684	15.326	21.0771
306106	12.658	1.5291	1.0405		6.63104	15.337	21.1055
306306	12.666	1.53	1.0419		6.63523	15.346	21.1339
306506	12.668	1.5311	1.0434		6.63627	15.3571	21.1643
306706	12.67	1.5322	1.0448		6.63732	15.3681	21.1927
306906	12.676	1.5332	1.0462		6.64047	15.3781	21.2211
307106	12.67	1.534	1.0474		6.63732	15.3862	21.2454
307306	12.676	1.5351	1.0486		6.64047	15.3972	21.2698
307506	12.682	1.5361	1.0498		6.64361	15.4072	21.2941
307706	12.678	1.5372	1.0511		6.64151	15.4183	21.3205
307906	12.676	1.538	1.0525		6.64047	15.4263	21.3489
308106	12.67	1.539	1.0539		6.63732	15.4363	21.3773
308306	12.668	1.5401	1.0553		6.63627	15.4473	21.4057
308506	12.66	1.5413	1.057		6.63208	15.4594	21.4402
308706	12.652	1.5422	1.0587		6.62789	15.4684	21.4746
308906	12.648	1.543	1.0601		6.6258	15.4764	21.503
309106	12.646	1.544	1.0614		6.62475	15.4865	21.5294
309306	12.654	1.5452	1.0626		6.62894	15.4985	21.5538
309506	12.512	1.5478	1.0643		6.55455	15.5246	21.5882
309706	12.394	1.5458	1.0655		6.49274	15.5045	21.6126
309906	12.438	1.5484	1.0664		6.51579	15.5306	21.6308
309950	11.434	1.5528	1.0752		5.98983	15.5747	21.8093
310150	11.438	1.5436	1.0793		5.99193	15.4824	21.8925
310350	11.686	1.552	1.0809		6.12184	15.5667	21.9249
310550	11.646	1.5544	1.0825		6.10089	15.5908	21.9574
310750	11.634	1.5541	1.0834		6.0946	15.5878	21.9757
310950	11.558	1.5524	1.084		6.05479	15.5707	21.9878
311150	11.586	1.5551	1.0844		6.06946	15.5978	21.9959
311350	11.61	1.5554	1.0846		6.08203	15.6008	22
311550	11.628	1.5564	1.085		6.09146	15.6108	22.0081
311750	11.646	1.5576	1.0855		6.10089	15.6229	22.0183
311950	11.65	1.5581	1.0862		6.10298	15.6279	22.0325
312150	11.672	1.5593	1.087		6.11451	15.6399	22.0487
312350	11.648	1.5608	1.0882		6.10194	15.655	22.073
312550	11.608	1.5611	1.0914		6.08098	15.658	22.1379
312750	11.604	1.5623	1.0944		6.07889	15.67	22.1988
312950	11.59	1.5635	1.0968		6.07155	15.682	22.2475
313150	11.536	1.5646	1.0999		6.04326	15.6931	22.3103
313350	11.496	1.5653	1.102		6.02231	15.7001	22.3529
313550	11.352	1.5672	1.1105		5.94687	15.7192	22.5254
313750	11.358	1.5677	1.1118		5.95002	15.7242	22.5517
313950	11.34	1.5681	1.113		5.94059	15.7282	22.5761
314150	11.304	1.5696	1.1154		5.92173	15.7432	22.6247
314350	11.306	1.5702	1.116		5.92278	15.7492	22.6369
314550	11.312	1.5712	1.1165		5.92592	15.7593	22.6471
314750	11.33	1.5725	1.117		5.93535	15.7723	22.6572
314950	11.34	1.5734	1.1175		5.94059	15.7813	22.6673
315150	11.358	1.5744	1.118		5.95002	15.7914	22.6775
315350	11.364	1.5754	1.1185		5.95316	15.8014	22.6876
315550	11.374	1.5763	1.119		5.9584	15.8104	22.6978
315750	11.394	1.5773	1.1195		5.96888	15.8205	22.7079
315950	11.406	1.5783	1.1201		5.97516	15.8305	22.7201
316150	11.416	1.5791	1.1207		5.9804	15.8385	22.7323
316350	11.434	1.5804	1.1211		5.98983	15.8516	22.7404
316550	11.444	1.5812	1.1217		5.99507	15.8596	22.7525
316750	11.462	1.5823	1.1223		6.0045	15.8706	22.7647
316950	11.466	1.5833	1.1229		6.00659	15.8806	22.7769
317150	11.474	1.5843	1.1232		6.01078	15.8907	22.783
317350	11.488	1.5853	1.1238		6.01812	15.9007	22.7951
317550	11.496	1.5864	1.1245		6.02231	15.9117	22.8093
317750	11.51	1.5875	1.1252		6.02964	15.9228	22.8235
317950	11.516	1.5883	1.126		6.03279	15.9308	22.8398
318150	11.526	1.5892	1.1266		6.03802	15.9398	22.8519
318350	11.522	1.5903	1.1282		6.03593	15.9509	22.8844
318550	11.526	1.5913	1.129		6.03802	15.9609	22.9006
318750	11.532	1.5923	1.13		6.04117	15.9709	22.9209
318950	11.526	1.5934	1.1312		6.03802	15.9819	22.9452
319150	11.502	1.5942	1.1341		6.02545	15.99	23.0041
319350	11.484	1.5956	1.1365		6.01602	16.004	23.0527
319550	11.474	1.5963	1.1385		6.01078	16.011	23.0933
319750	11.462	1.5974	1.14		6.0045	16.0221	23.1237
319950	11.466	1.5982	1.141		6.00659	16.0301	23.144
320150	11.47	1.5992	1.1419		6.00869	16.0401	23.1623
320350	11.484	1.6004	1.1427		6.01602	16.0522	23.1785
320550	11.476	1.6016	1.1436		6.01183	16.0642	23.1968
320750	11.472	1.6023	1.1444		6.00974	16.0712	23.213
320950	11.48	1.6032	1.1452		6.01393	16.0802	23.2292
321150	11.488	1.6042	1.1461		6.01812	16.0903	23.2475
321350	11.496	1.6053	1.147		6.02231	16.1013	23.2657
321550	11.506	1.6062	1.1479		6.02755	16.1103	23.284
321750	11.502	1.6072	1.1491		6.02545	16.1204	23.3083
321950	11.502	1.6084	1.1504		6.02545	16.1324	23.3347
322150	11.5	1.6092	1.1519		6.0244	16.1404	23.3651
322350	11.502	1.6103	1.1533		6.02545	16.1515	23.3935
322550	11.504	1.6113	1.1549		6.0265	16.1615	23.426
322750	11.51	1.6122	1.1566		6.02964	16.1705	23.4604
322950	11.512	1.6134	1.1581		6.03069	16.1825	23.4909
323150	11.302	1.6143	1.1609		5.92068	16.1916	23.5477
323350	11.228	1.6154	1.1653		5.88191	16.2026	23.6369
323550	11.178	1.6166	1.1676		5.85572	16.2146	23.6836
323750	11.136	1.6173	1.1695		5.83372	16.2217	23.7221
323950	11.124	1.6183	1.171		5.82743	16.2317	23.7525
324150	11.124	1.6193	1.172		5.82743	16.2417	23.7728
324350	11.122	1.6204	1.1724		5.82638	16.2528	23.7809
324550	11.118	1.6213	1.1732		5.82429	16.2618	23.7972
324750	11.124	1.6222	1.1741		5.82743	16.2708	23.8154
324950	11.134	1.6233	1.1749		5.83267	16.2818	23.8316
325150	11.142	1.6243	1.1758		5.83686	16.2919	23.8499
325350	11.15	1.6252	1.1766		5.84105	16.3009	23.8661
325550	11.16	1.6263	1.1774		5.84629	16.3119	23.8824
325750	11.156	1.6273	1.1782		5.8442	16.322	23.8986
325950	11.16	1.6282	1.1789		5.84629	16.331	23.9128
326150	11.166	1.6294	1.1796		5.84943	16.343	23.927
326350	11.17	1.6303	1.1802		5.85153	16.3521	23.9391
326550	11.178	1.6311	1.181		5.85572	16.3601	23.9554
326750	11.182	1.6323	1.1816		5.85782	16.3721	23.9675
326950	11.19	1.6332	1.1822		5.86201	16.3811	23.9797
327150	11.186	1.6342	1.1831		5.85991	16.3912	23.998
327350	11.182	1.6351	1.1841		5.85782	16.4002	24.0183
327550	11.178	1.6363	1.185		5.85572	16.4122	24.0365
327750	11.18	1.6372	1.1861		5.85677	16.4213	24.0588
327950	11.174	1.6382	1.1874		5.85363	16.4313	24.0852
328150	11.156	1.6392	1.1889		5.8442	16.4413	24.1156
328350	11.15	1.6404	1.1905		5.84105	16.4534	24.1481
328550	11.144	1.6413	1.1923		5.83791	16.4624	24.1846
328750	11.132	1.6422	1.194		5.83162	16.4714	24.2191
328950	11.124	1.6431	1.1956		5.82743	16.4804	24.2515
329150	11.12	1.6441	1.1973		5.82534	16.4905	24.286
329350	11.118	1.6453	1.1992		5.82429	16.5025	24.3245
329550	11.114	1.6463	1.2008		5.82219	16.5125	24.357
329750	11.108	1.6472	1.2026		5.81905	16.5216	24.3935
329950	11.106	1.6481	1.204		5.818	16.5306	24.4219
330150	11.108	1.6493	1.2054		5.81905	16.5426	24.4503
330350	11.106	1.6503	1.2071		5.818	16.5527	24.4848
330550	11.1	1.6513	1.2087		5.81486	16.5627	24.5172
330750	11.102	1.6523	1.2101		5.81591	16.5727	24.5456
330950	11.102	1.6534	1.2114		5.81591	16.5838	24.572
331150	11.1	1.6542	1.2129		5.81486	16.5918	24.6024
331350	11.102	1.6552	1.2143		5.81591	16.6018	24.6308
331550	11.1	1.6562	1.2158		5.81486	16.6118	24.6613
331750	11.1	1.6572	1.2172		5.81486	16.6219	24.6897
331950	11.1	1.6581	1.2199		5.81486	16.6309	24.7444
332150	11.104	1.6591	1.2217		5.81696	16.6409	24.7809
332350	11.104	1.6602	1.2231		5.81696	16.652	24.8093
332550	11.108	1.6613	1.2247		5.81905	16.663	24.8418
332750	11.106	1.6623	1.226		5.818	16.673	24.8682
332950	11.106	1.6633	1.2273		5.818	16.683	24.8945
333150	11.1	1.6642	1.2292		5.81486	16.6921	24.9331
333350	11.1	1.6653	1.2306		5.81486	16.7031	24.9615
333550	11.1	1.6662	1.232		5.81486	16.7121	24.9899
333750	11.096	1.6672	1.2335		5.81276	16.7222	25.0203
333950	11.096	1.6683	1.2355		5.81276	16.7332	25.0609
334150	11.07	1.6691	1.2398		5.79914	16.7412	25.1481
334350	11.062	1.6703	1.2429		5.79495	16.7533	25.211
334550	11.056	1.6712	1.2453		5.79181	16.7623	25.2596
334750	11.046	1.6722	1.2478		5.78657	16.7723	25.3103
334950	11.04	1.6733	1.2504		5.78343	16.7834	25.3631
335150	11.028	1.6742	1.2529		5.77714	16.7924	25.4138
335350	11.02	1.6752	1.2555		5.77295	16.8024	25.4665
335550	11.01	1.6763	1.2578		5.76771	16.8134	25.5132
335750	11.004	1.6774	1.2597		5.76457	16.8245	25.5517
335950	10.998	1.6783	1.2617		5.76143	16.8335	25.5923
336150	10.986	1.6792	1.2636		5.75514	16.8425	25.6308
336350	10.98	1.6801	1.2652		5.752	16.8516	25.6633
336550	10.976	1.6812	1.2669		5.7499	16.8626	25.6978
336750	10.974	1.6822	1.2686		5.74885	16.8726	25.7323
336950	10.976	1.6832	1.2703		5.7499	16.8826	25.7667
337150	10.974	1.6843	1.2718		5.74885	16.8937	25.7972
337350	10.968	1.6852	1.2734		5.74571	16.9027	25.8296
337550	10.968	1.6861	1.2747		5.74571	16.9117	25.856
337750	10.97	1.687	1.2761		5.74676	16.9208	25.8844
337950	10.966	1.6881	1.2777		5.74466	16.9318	25.9168
338150	10.966	1.6892	1.2795		5.74466	16.9428	25.9533
338350	10.964	1.6901	1.2812		5.74361	16.9519	25.9878
338550	10.96	1.6911	1.283		5.74152	16.9619	26.0243
338750	10.96	1.6921	1.2846		5.74152	16.9719	26.0568
338950	10.962	1.6932	1.2863		5.74257	16.9829	26.0913
339150	10.956	1.6942	1.2882		5.73942	16.993	26.1298
339350	10.95	1.6951	1.29		5.73628	17.002	26.1663
339550	10.95	1.6963	1.2917		5.73628	17.014	26.2008
339750	10.948	1.6972	1.2935		5.73523	17.0231	26.2373
339950	10.95	1.6983	1.2954		5.73628	17.0341	26.2759
340150	10.946	1.6993	1.2973		5.73419	17.0441	26.3144
340350	10.94	1.7003	1.299		5.73104	17.0542	26.3489
340550	10.94	1.7011	1.3006		5.73104	17.0622	26.3813
340750	10.942	1.7022	1.3021		5.73209	17.0732	26.4118
340950	10.942	1.7031	1.3037		5.73209	17.0822	26.4442
341150	10.94	1.7043	1.3052		5.73104	17.0943	26.4746
341350	10.94	1.7051	1.3066		5.73104	17.1023	26.503
341550	10.946	1.7062	1.308		5.73419	17.1133	26.5314
341750	10.946	1.7072	1.3094		5.73419	17.1234	26.5598
341950	10.95	1.7082	1.3106		5.73628	17.1334	26.5842
342150	10.952	1.7091	1.3119		5.73733	17.1424	26.6105
342350	10.954	1.7102	1.3132		5.73838	17.1535	26.6369
342550	10.954	1.7112	1.3146		5.73838	17.1635	26.6653
342750	10.956	1.7121	1.3159		5.73942	17.1725	26.6917
342950	10.958	1.7131	1.3173		5.74047	17.1825	26.7201
343150	10.96	1.7142	1.3186		5.74152	17.1936	26.7465
343350	10.96	1.7151	1.3199		5.74152	17.2026	26.7728
343550	10.96	1.7161	1.3214		5.74152	17.2126	26.8032
343750	10.952	1.7173	1.3232		5.73733	17.2247	26.8398
343950	10.952	1.7183	1.3248		5.73733	17.2347	26.8722
344150	10.946	1.7191	1.3264		5.73419	17.2427	26.9047
344350	10.948	1.7202	1.328		5.73523	17.2538	26.9371
344550	10.948	1.7211	1.3297		5.73523	17.2628	26.9716
344750	10.952	1.7222	1.3313		5.73733	17.2738	27.0041
344950	10.95	1.7232	1.3328		5.73628	17.2839	27.0345
345150	10.948	1.724	1.3345		5.73523	17.2919	27.069
345350	10.948	1.7252	1.3363		5.73523	17.3039	27.1055
345550	10.938	1.7265	1.3382		5.72999	17.317	27.144
345750	10.928	1.7275	1.3399		5.72476	17.327	27.1785
345950	10.92	1.7281	1.3416		5.72056	17.333	27.213
346150	10.91	1.7293	1.3435		5.71533	17.345	27.2515
346350	10.9	1.7303	1.345		5.71009	17.3551	27.2819
346550	10.898	1.7312	1.3464		5.70904	17.3641	27.3103
346750	10.896	1.7323	1.3478		5.70799	17.3751	27.3387
346950	10.896	1.7332	1.3494		5.70799	17.3842	27.3712
347150	10.89	1.7341	1.3508		5.70485	17.3932	27.3996
347350	10.89	1.7351	1.3525		5.70485	17.4032	27.4341
347550	10.892	1.7361	1.354		5.7059	17.4132	27.4645
347750	10.89	1.7371	1.3555		5.70485	17.4233	27.4949
347950	10.852	1.7384	1.3574		5.68494	17.4363	27.5335
348150	10.818	1.7393	1.3602		5.66713	17.4453	27.5903
348350	10.806	1.7403	1.3621		5.66084	17.4554	27.6288
348550	10.8	1.7411	1.3636		5.6577	17.4634	27.6592
348750	10.798	1.742	1.3653		5.65665	17.4724	27.6937
348950	10.792	1.7431	1.3667		5.65351	17.4835	27.7221
349150	10.792	1.7442	1.3681		5.65351	17.4945	27.7505
349350	10.792	1.7451	1.3698		5.65351	17.5035	27.785
349550	10.788	1.7461	1.3713		5.65142	17.5135	27.8154
349750	10.782	1.7473	1.3729		5.64827	17.5256	27.8479
349950	10.768	1.7483	1.3744		5.64094	17.5356	27.8783
350150	10.702	1.7494	1.377		5.60636	17.5466	27.931
350350	10.618	1.7506	1.3798		5.56236	17.5587	27.9878
350550	10.544	1.7513	1.3838		5.52359	17.5657	28.069
350750	10.512	1.7521	1.3862		5.50683	17.5737	28.1176
350950	10.502	1.7532	1.388		5.50159	17.5848	28.1542
351150	10.492	1.7542	1.3897		5.49635	17.5948	28.1886
351350	10.444	1.756	1.3917		5.47121	17.6128	28.2292
351550	10.38	1.7561	1.393		5.43768	17.6138	28.2556
351750	10.368	1.7567	1.3937		5.43139	17.6199	28.2698
351950	10.38	1.7586	1.3948		5.43768	17.6389	28.2921
352150	10.368	1.7594	1.3959		5.43139	17.6469	28.3144
352350	10.358	1.7601	1.3968		5.42615	17.654	28.3327
352550	10.36	1.761	1.3977		5.4272	17.663	28.3509
352750	10.36	1.762	1.3988		5.4272	17.673	28.3732
352950	10.362	1.7631	1.4		5.42825	17.6841	28.3976
353150	10.364	1.7641	1.4011		5.4293	17.6941	28.4199
353350	10.364	1.7649	1.4021		5.4293	17.7021	28.4402
353550	10.37	1.766	1.4031		5.43244	17.7131	28.4604
353750	10.38	1.7673	1.4042		5.43768	17.7262	28.4828
353950	10.382	1.7682	1.4054		5.43873	17.7352	28.5071
354150	10.384	1.7692	1.4063		5.43978	17.7452	28.5254
354350	10.384	1.7701	1.4072		5.43978	17.7543	28.5436
354550	10.386	1.7711	1.408		5.44082	17.7643	28.5598
354750	10.388	1.7721	1.4091		5.44187	17.7743	28.5822
354950	10.39	1.7728	1.4101		5.44292	17.7813	28.6024
355150	10.39	1.774	1.4111		5.44292	17.7934	28.6227
355350	10.392	1.7752	1.4121		5.44397	17.8054	28.643
355550	10.386	1.7761	1.4131		5.44082	17.8144	28.6633
355750	10.38	1.7771	1.4144		5.43768	17.8245	28.6897
355950	10.38	1.778	1.4155		5.43768	17.8335	28.712
356150	10.378	1.7791	1.4165		5.43663	17.8445	28.7323
356350	10.378	1.7801	1.4176		5.43663	17.8546	28.7546
356550	10.376	1.781	1.4187		5.43558	17.8636	28.7769
356750	10.374	1.782	1.4197		5.43454	17.8736	28.7972
356950	10.378	1.783	1.4207		5.43663	17.8837	28.8174
357150	10.382	1.7842	1.4217		5.43873	17.8957	28.8377
357350	10.38	1.7853	1.4227		5.43768	17.9067	28.858
357550	10.376	1.7862	1.4239		5.43558	17.9157	28.8824
357750	10.372	1.7872	1.4249		5.43349	17.9258	28.9026
357950	10.37	1.7883	1.426		5.43244	17.9368	28.9249
358150	10.37	1.7893	1.427		5.43244	17.9468	28.9452
358350	10.362	1.7902	1.428		5.42825	17.9559	28.9655
358550	10.362	1.7911	1.429		5.42825	17.9649	28.9858
358750	10.342	1.7921	1.4301		5.41777	17.9749	29.0081
358950	10.334	1.7931	1.4315		5.41358	17.985	29.0365
359150	10.33	1.7944	1.4328		5.41149	17.998	29.0629
359350	10.324	1.7952	1.434		5.40834	18.006	29.0872
359550	10.32	1.7961	1.4351		5.40625	18.015	29.1095
359750	10.314	1.7971	1.4364		5.4031	18.0251	29.1359
359950	10.31	1.7982	1.4376		5.40101	18.0361	29.1602
360150	10.304	1.7991	1.4388		5.39787	18.0451	29.1846
360350	10.3	1.8001	1.44		5.39577	18.0552	29.2089
360550	10.294	1.8011	1.4413		5.39263	18.0652	29.2353
360750	10.282	1.8021	1.4427		5.38634	18.0752	29.2637
360950	10.272	1.8033	1.4441		5.3811	18.0873	29.2921
361150	10.26	1.8042	1.4454		5.37482	18.0963	29.3185
361350	10.252	1.8052	1.4467		5.37063	18.1063	29.3448
361550	10.24	1.8061	1.448		5.36434	18.1153	29.3712
361750	10.222	1.8073	1.4492		5.35491	18.1274	29.3955
361950	10.136	1.8084	1.4529		5.30986	18.1384	29.4706
362150	10.084	1.8094	1.4559		5.28262	18.1484	29.5314
362350	10.048	1.8103	1.458		5.26376	18.1575	29.574
362550	10.024	1.8112	1.4598		5.25119	18.1665	29.6105
362750	10.004	1.8121	1.4613		5.24071	18.1755	29.641
362950	9.988	1.8131	1.4628		5.23233	18.1856	29.6714
363150	9.976	1.8142	1.4641		5.22604	18.1966	29.6978
363350	9.95	1.8152	1.4655		5.21242	18.2066	29.7262
363550	9.908	1.8163	1.4675		5.19042	18.2177	29.7667
363750	9.884	1.8172	1.4691		5.17784	18.2267	29.7992
363950	9.858	1.8181	1.4709		5.16422	18.2357	29.8357
364150	9.83	1.819	1.4725		5.14956	18.2447	29.8682
364350	9.804	1.8202	1.4746		5.13594	18.2568	29.9108
364550	9.778	1.8212	1.4769		5.12232	18.2668	29.9574
364750	9.74	1.8222	1.4789		5.10241	18.2768	29.998
364950	9.672	1.8236	1.4819		5.06679	18.2909	30.0588
365150	9.618	1.8242	1.4848		5.0385	18.2969	30.1176
365350	9.574	1.8251	1.487		5.01545	18.3059	30.1623
365550	9.494	1.8262	1.4902		4.97354	18.317	30.2272
365750	9.41	1.8273	1.4967		4.92953	18.328	30.359
365950	9.31	1.8287	1.5031		4.87715	18.342	30.4888
366150	9.232	1.8291	1.5069		4.83629	18.346	30.5659
366350	9.182	1.8298	1.51		4.81009	18.3531	30.6288
366550	9.148	1.8308	1.5125		4.79228	18.3631	30.6795
366750	9.092	1.8323	1.5159		4.76295	18.3781	30.7485
366950	9.012	1.8334	1.52		4.72104	18.3892	30.8316
367150	8.98	1.8341	1.5227		4.70427	18.3962	30.8864
367350	8.954	1.835	1.5248		4.69065	18.4052	30.929
367550	8.936	1.8359	1.5268		4.68122	18.4142	30.9696
367750	8.92	1.8369	1.5288		4.67284	18.4243	31.0101
367950	8.904	1.838	1.5308		4.66446	18.4353	31.0507
368150	8.228	1.8423	1.5397		4.31033	18.4784	31.2312
368350	8.076	1.8351	1.542		4.2307	18.4062	31.2779
368550	8.248	1.8402	1.5434		4.32081	18.4574	31.3063
368750	8.242	1.846	1.5445		4.31766	18.5155	31.3286
368950	8.106	1.8463	1.5454		4.24642	18.5186	31.3469
369150	8.002	1.8442	1.5461		4.19194	18.4975	31.3611
369350	7.97	1.8432	1.5468		4.17517	18.4875	31.3753
369550	7.992	1.8438	1.5474		4.1867	18.4935	31.3874
369750	8.006	1.8458	1.5477		4.19403	18.5135	31.3935
369950	8.096	1.8493	1.5482		4.24118	18.5486	31.4037
370150	8.076	1.8486	1.5485		4.2307	18.5416	31.4097
370350	8.12	1.8502	1.549		4.25375	18.5577	31.4199
370550	8.122	1.851	1.5496		4.2548	18.5657	31.432
370750	8.126	1.8519	1.5501		4.2569	18.5747	31.4422
370950	8.13	1.8531	1.5509		4.25899	18.5868	31.4584
371150	8.142	1.8544	1.5516		4.26528	18.5998	31.4726
371350	8.136	1.8547	1.5522		4.26214	18.6028	31.4848
371550	8.138	1.8559	1.553		4.26318	18.6148	31.501
371750	8.148	1.8571	1.5538		4.26842	18.6269	31.5172
371950	8.154	1.8582	1.5545		4.27156	18.6379	31.5314
372150	8.156	1.8591	1.5554		4.27261	18.6469	31.5497
372350	8.158	1.8601	1.5564		4.27366	18.657	31.57
372550	8.148	1.861	1.5576		4.26842	18.666	31.5943
372750	8.158	1.8622	1.5587		4.27366	18.678	31.6166
372950	8.142	1.863	1.5607		4.26528	18.6861	31.6572
373150	8.132	1.864	1.5637		4.26004	18.6961	31.7181
373350	8.126	1.865	1.5657		4.2569	18.7061	31.7586
373550	8.12	1.8659	1.5671		4.25375	18.7151	31.787
373750	8.118	1.867	1.5683		4.25271	18.7262	31.8114
373950	8.12	1.8679	1.5696		4.25375	18.7352	31.8377
374150	8.122	1.869	1.5707		4.2548	18.7462	31.86
374350	8.114	1.87	1.572		4.25061	18.7563	31.8864
374550	8.11	1.8711	1.5729		4.24851	18.7673	31.9047
374750	8.104	1.872	1.5741		4.24537	18.7763	31.929
374950	8.096	1.8729	1.5755		4.24118	18.7854	31.9574
375150	8.09	1.8739	1.5768		4.23804	18.7954	31.9838
375350	8.086	1.875	1.5782		4.23594	18.8064	32.0122
375550	8.076	1.8759	1.5794		4.2307	18.8154	32.0365
375750	8.074	1.8769	1.5809		4.22966	18.8255	32.0669
375950	8.072	1.8781	1.5824		4.22861	18.8375	32.0974
376150	8.068	1.879	1.5838		4.22651	18.8465	32.1258
376350	8.06	1.8799	1.5852		4.22232	18.8556	32.1542
376550	8.064	1.881	1.5866		4.22442	18.8666	32.1826
376750	8.06	1.882	1.588		4.22232	18.8766	32.211
376950	8.058	1.883	1.5894		4.22127	18.8867	32.2394
377150	8.052	1.884	1.5907		4.21813	18.8967	32.2657
377350	8.052	1.885	1.5922		4.21813	18.9067	32.2961
377550	8.052	1.886	1.5935		4.21813	18.9168	32.3225
377750	8.044	1.887	1.5947		4.21394	18.9268	32.3469
377950	8.034	1.888	1.596		4.2087	18.9368	32.3732
378150	8.026	1.889	1.5973		4.20451	18.9468	32.3996
378350	7.962	1.8904	1.5995		4.17098	18.9609	32.4442
378550	7.78	1.891	1.6029		4.07564	18.9669	32.5132
378750	7.716	1.8916	1.6052		4.04211	18.9729	32.5598
378950	7.666	1.893	1.6078		4.01592	18.987	32.6126
379150	7.632	1.8939	1.6095		3.99811	18.996	32.6471
379350	7.606	1.8951	1.6116		3.98449	19.008	32.6897
379550	7.578	1.896	1.6132		3.96982	19.0171	32.7221
379750	7.562	1.8968	1.6146		3.96144	19.0251	32.7505
379950	7.548	1.8979	1.6161		3.9541	19.0361	32.7809
380150	7.53	1.8991	1.6177		3.94468	19.0481	32.8134
380350	7.512	1.8999	1.6191		3.93525	19.0562	32.8418
380550	7.5	1.901	1.6206		3.92896	19.0672	32.8722
380750	7.486	1.902	1.6221		3.92163	19.0772	32.9026
380950	7.47	1.9027	1.6235		3.91324	19.0843	32.931
381150	7.458	1.904	1.6249		3.90696	19.0973	32.9594
381350	7.444	1.905	1.6263		3.89962	19.1073	32.9878
381550	7.424	1.9061	1.6276		3.88915	19.1184	33.0142
381750	7.404	1.9068	1.6289		3.87867	19.1254	33.0406
381950	7.396	1.908	1.6302		3.87448	19.1374	33.0669
382150	7.384	1.9089	1.6317		3.86819	19.1464	33.0974
382350	7.38	1.9099	1.633		3.8661	19.1565	33.1237
382550	7.372	1.9111	1.6341		3.86191	19.1685	33.146
382750	7.362	1.912	1.6354		3.85667	19.1775	33.1724
382950	7.358	1.9129	1.6366		3.85457	19.1866	33.1968
383150	7.352	1.9139	1.6377		3.85143	19.1966	33.2191
383350	7.35	1.9149	1.6388		3.85038	19.2066	33.2414
383550	7.346	1.916	1.6398		3.84828	19.2177	33.2617
383750	7.328	1.9171	1.6417		3.83886	19.2287	33.3002
383950	7.306	1.9181	1.6435		3.82733	19.2387	33.3367
384150	7.282	1.9191	1.645		3.81476	19.2487	33.3671
384350	7.23	1.92	1.6478		3.78752	19.2578	33.4239
384550	7.192	1.921	1.6503		3.76761	19.2678	33.4746
384750	7.16	1.922	1.6526		3.75085	19.2778	33.5213
384950	7.124	1.9231	1.6551		3.73199	19.2889	33.572
385150	7.076	1.924	1.6574		3.70684	19.2979	33.6187
385350	7.052	1.9249	1.6592		3.69427	19.3069	33.6552
385550	7.034	1.9258	1.6607		3.68484	19.3159	33.6856
385750	7.024	1.9267	1.6622		3.6796	19.325	33.716
385950	7.014	1.9279	1.6635		3.67436	19.337	33.7424
386150	7.006	1.9289	1.6643		3.67017	19.347	33.7586
386350	6.998	1.9298	1.6655		3.66598	19.3561	33.783
386550	6.984	1.9308	1.6667		3.65865	19.3661	33.8073
386750	6.982	1.9318	1.6675		3.6576	19.3761	33.8235
386950	6.976	1.9329	1.6688		3.65446	19.3872	33.8499
387150	6.97	1.9339	1.6701		3.65131	19.3972	33.8763
387350	6.966	1.9349	1.6714		3.64922	19.4072	33.9026
387550	6.96	1.936	1.6727		3.64607	19.4183	33.929
387750	6.956	1.9369	1.674		3.64398	19.4273	33.9554
387950	6.952	1.938	1.6751		3.64188	19.4383	33.9777
388150	6.932	1.939	1.6784		3.63141	19.4483	34.0446
388350	6.924	1.9399	1.6801		3.62722	19.4574	34.0791
388550	6.918	1.941	1.6816		3.62407	19.4684	34.1095
388750	6.91	1.9419	1.6829		3.61988	19.4774	34.1359
388950	6.902	1.9429	1.6845		3.61569	19.4875	34.1684
389150	6.894	1.9442	1.6865		3.6115	19.5005	34.2089
389350	6.88	1.9449	1.6882		3.60417	19.5075	34.2434
389550	6.87	1.9459	1.6897		3.59893	19.5176	34.2738
389750	6.862	1.9469	1.6912		3.59474	19.5276	34.3043
389950	6.858	1.9479	1.6926		3.59264	19.5376	34.3327
390150	6.854	1.9489	1.694		3.59055	19.5476	34.3611
390350	6.844	1.9498	1.6954		3.58531	19.5567	34.3895
390550	6.84	1.951	1.6968		3.58321	19.5687	34.4178
390750	6.832	1.9519	1.6981		3.57902	19.5777	34.4442
390950	6.828	1.953	1.6993		3.57692	19.5888	34.4686
391150	6.82	1.9539	1.7009		3.57273	19.5978	34.501
391350	6.818	1.955	1.7023		3.57169	19.6088	34.5294
391550	6.808	1.9559	1.7036		3.56645	19.6179	34.5558
391750	6.798	1.9569	1.7049		3.56121	19.6279	34.5822
391950	6.772	1.9579	1.7069		3.54759	19.6379	34.6227
392150	6.754	1.9589	1.7089		3.53816	19.6479	34.6633
392350	6.724	1.9601	1.7106		3.52244	19.66	34.6978
392550	6.684	1.961	1.713		3.50149	19.669	34.7465
392750	6.654	1.9617	1.7144		3.48577	19.676	34.7748
392950	6.61	1.9629	1.7166		3.46272	19.6881	34.8195

## Sheet: GD-5
Force (small)	--	journey	) Results Report
17:21:53,06/23/2019
Diameter: 49.7	mm	Height: 100.2	mm
Vertical force transducer (Test piece vertical force)
Control mode: displacement	Waveform: Slope
mm/s	Force the finish:2.0235	mm	Confining pressure rate :0.500	MPa/s	End point of confining pressure :6.00060	MPa
Time (ms)	Vertical force (KN)	Vertical deformation (mm)	Confining pressure (MPa)		stress	Axial strain	Lateral strain
0	0	0	0		0	0	0
200	0.014	0.0007	-0.0002		0.00721648	0.00698603	-0.00402414
400	0.03	0.0021	-0.0001		0.0154639	0.0209581	-0.00201207
600	0.046	0.0037	-0.0003		0.0237113	0.0369261	-0.00603622
800	0.056	0.0046	-0.0004		0.0288659	0.0459082	-0.00804829
1000	0.062	0.0054	-0.0005		0.0319587	0.0538922	-0.0100604
1200	0.068	0.0064	-0.0006		0.0350515	0.0638723	-0.0120724
1400	0.078	0.0074	-0.0006		0.0402061	0.0738523	-0.0120724
1600	0.086	0.0086	-0.0008		0.0443298	0.0858283	-0.0160966
1800	0.088	0.0095	-0.0008		0.0453607	0.0948104	-0.0160966
2000	0.096	0.0105	-0.001		0.0494844	0.10479	-0.0201207
2200	0.1	0.0116	-0.0011		0.0515463	0.115768	-0.0221328
2400	0.104	0.0126	-0.0011		0.0536081	0.125749	-0.0221328
2600	0.11	0.0136	-0.0011		0.0567009	0.135729	-0.0221328
2800	0.116	0.0145	-0.0012		0.0597937	0.144711	-0.0241449
3000	0.122	0.0154	-0.0013		0.0628865	0.153693	-0.0261569
3200	0.128	0.0164	-0.0014		0.0659792	0.163673	-0.028169
3400	0.132	0.0175	-0.0014		0.0680411	0.174651	-0.028169
3600	0.14	0.0188	-0.0015		0.0721648	0.187625	-0.0301811
3800	0.142	0.0197	-0.0015		0.0731957	0.196607	-0.0301811
4000	0.146	0.0205	-0.0016		0.0752576	0.204591	-0.0321932
4200	0.15	0.0215	-0.0017		0.0773194	0.214571	-0.0342052
4400	0.156	0.0223	-0.0017		0.0804122	0.222555	-0.0342052
4600	0.164	0.0234	-0.0017		0.0845359	0.233533	-0.0342052
4800	0.166	0.0245	-0.0018		0.0855668	0.244511	-0.0362173
5000	0.172	0.0256	-0.0018		0.0886596	0.255489	-0.0362173
5200	0.178	0.0265	-0.0019		0.0917524	0.264471	-0.0382294
5400	0.178	0.0275	-0.0019		0.0917524	0.274451	-0.0382294
5600	0.188	0.0285	-0.0019		0.096907	0.284431	-0.0382294
5800	0.192	0.0296	-0.0018		0.0989689	0.295409	-0.0362173
6000	0.2	0.0306	-0.002		0.103093	0.305389	-0.0402414
6200	0.206	0.0316	-0.0019		0.106185	0.315369	-0.0382294
6400	0.21	0.0326	-0.0019		0.108247	0.325349	-0.0382294
6600	0.218	0.0337	-0.0019		0.112371	0.336327	-0.0382294
6800	0.224	0.0346	-0.0019		0.115464	0.345309	-0.0382294
7000	0.226	0.0356	-0.0019		0.116495	0.355289	-0.0382294
7200	0.232	0.0367	-0.0019		0.119587	0.366267	-0.0382294
7400	0.238	0.0377	-0.0019		0.12268	0.376248	-0.0382294
7600	0.242	0.0385	-0.0019		0.124742	0.384232	-0.0382294
7800	0.246	0.0396	-0.0019		0.126804	0.39521	-0.0382294
8000	0.25	0.0405	-0.0019		0.128866	0.404192	-0.0382294
8200	0.258	0.0414	-0.0019		0.132989	0.413174	-0.0382294
8400	0.266	0.0426	-0.0019		0.137113	0.42515	-0.0382294
8600	0.268	0.0436	-0.0018		0.138144	0.43513	-0.0362173
8800	0.276	0.0446	-0.0019		0.142268	0.44511	-0.0382294
9000	0.278	0.0455	-0.0019		0.143299	0.454092	-0.0382294
9200	0.286	0.0465	-0.0018		0.147422	0.464072	-0.0362173
9400	0.288	0.0476	-0.0018		0.148453	0.47505	-0.0362173
9600	0.294	0.0486	-0.0019		0.151546	0.48503	-0.0382294
9800	0.298	0.0497	-0.0019		0.153608	0.496008	-0.0382294
10000	0.302	0.0505	-0.0019		0.15567	0.503992	-0.0382294
10200	0.308	0.0515	-0.0019		0.158763	0.513972	-0.0382294
10400	0.314	0.0527	-0.002		0.161855	0.525948	-0.0402414
10600	0.32	0.0537	-0.002		0.164948	0.535928	-0.0402414
10800	0.326	0.0547	-0.002		0.168041	0.545908	-0.0402414
11000	0.33	0.0555	-0.0019		0.170103	0.553892	-0.0382294
11200	0.334	0.0566	-0.0019		0.172165	0.56487	-0.0382294
11400	0.342	0.0575	-0.0019		0.176288	0.573852	-0.0382294
11600	0.348	0.0586	-0.002		0.179381	0.58483	-0.0402414
11800	0.35	0.0595	-0.002		0.180412	0.593812	-0.0402414
12000	0.356	0.0605	-0.002		0.183505	0.603792	-0.0402414
12200	0.362	0.0615	-0.002		0.186598	0.613772	-0.0402414
12400	0.368	0.0625	-0.002		0.18969	0.623752	-0.0402414
12600	0.376	0.0638	-0.002		0.193814	0.636727	-0.0402414
12800	0.38	0.0645	-0.0019		0.195876	0.643713	-0.0382294
13000	0.386	0.0655	-0.002		0.198969	0.653693	-0.0402414
13200	0.392	0.0664	-0.002		0.202061	0.662675	-0.0402414
13400	0.398	0.0675	-0.0019		0.205154	0.673653	-0.0382294
13600	0.404	0.0684	-0.0019		0.208247	0.682635	-0.0382294
13800	0.41	0.0695	-0.0018		0.21134	0.693613	-0.0362173
14000	0.416	0.0704	-0.0018		0.214433	0.702595	-0.0362173
14200	0.422	0.0715	-0.0018		0.217525	0.713573	-0.0362173
14400	0.426	0.0725	-0.0017		0.219587	0.723553	-0.0342052
14600	0.434	0.0735	-0.0017		0.223711	0.733533	-0.0342052
14800	0.444	0.0747	-0.0018		0.228865	0.745509	-0.0362173
15000	0.446	0.0756	-0.0017		0.229896	0.754491	-0.0342052
15200	0.454	0.0765	-0.0016		0.23402	0.763473	-0.0321932
15400	0.46	0.0776	-0.0016		0.237113	0.774451	-0.0321932
15600	0.466	0.0784	-0.0017		0.240206	0.782435	-0.0342052
15800	0.474	0.0794	-0.0015		0.244329	0.792415	-0.0301811
16000	0.48	0.0805	-0.0016		0.247422	0.803393	-0.0321932
16200	0.488	0.0814	-0.0016		0.251546	0.812375	-0.0321932
16400	0.492	0.0825	-0.0015		0.253608	0.823353	-0.0301811
16600	0.498	0.0834	-0.0016		0.2567	0.832335	-0.0321932
16800	0.504	0.0845	-0.0016		0.259793	0.843313	-0.0321932
17000	0.514	0.0855	-0.0015		0.264948	0.853293	-0.0301811
17200	0.516	0.0864	-0.0016		0.265979	0.862275	-0.0321932
17400	0.522	0.0875	-0.0015		0.269072	0.873253	-0.0301811
17600	0.528	0.0885	-0.0015		0.272164	0.883234	-0.0301811
17800	0.536	0.0894	-0.0014		0.276288	0.892216	-0.028169
18000	0.542	0.0904	-0.0014		0.279381	0.902196	-0.028169
18200	0.55	0.0913	-0.0014		0.283505	0.911178	-0.028169
18400	0.558	0.0925	-0.0014		0.287628	0.923154	-0.028169
18600	0.564	0.0934	-0.0014		0.290721	0.932136	-0.028169
18800	0.572	0.0944	-0.0013		0.294845	0.942116	-0.0261569
19000	0.578	0.0952	-0.0014		0.297938	0.9501	-0.028169
19200	0.582	0.0963	-0.0013		0.299999	0.961078	-0.0261569
19400	0.59	0.0974	-0.0013		0.304123	0.972056	-0.0261569
19600	0.6	0.0986	-0.0012		0.309278	0.984032	-0.0241449
19800	0.606	0.0994	-0.0013		0.31237	0.992016	-0.0261569
20000	0.612	0.1004	-0.0012		0.315463	1.002	-0.0241449
20200	0.62	0.1014	-0.0012		0.319587	1.01198	-0.0241449
20400	0.628	0.1023	-0.0012		0.323711	1.02096	-0.0241449
20600	0.632	0.1033	-0.0011		0.325772	1.03094	-0.0221328
20800	0.644	0.1043	-0.0012		0.331958	1.04092	-0.0241449
21000	0.65	0.1053	-0.0011		0.335051	1.0509	-0.0221328
21200	0.656	0.1063	-0.0011		0.338144	1.06088	-0.0221328
21400	0.664	0.1074	-0.0011		0.342267	1.07186	-0.0221328
21600	0.67	0.1085	-0.0011		0.34536	1.08283	-0.0221328
21800	0.678	0.1094	-0.0011		0.349484	1.09182	-0.0221328
22000	0.684	0.1105	-0.001		0.352577	1.10279	-0.0201207
22200	0.696	0.1114	-0.001		0.358762	1.11178	-0.0201207
22400	0.706	0.1124	-0.001		0.363917	1.12176	-0.0201207
22600	0.71	0.1133	-0.0009		0.365979	1.13074	-0.0181087
22800	0.718	0.1144	-0.0008		0.370102	1.14172	-0.0160966
23000	0.726	0.1152	-0.0009		0.374226	1.1497	-0.0181087
23200	0.732	0.1163	-0.0009		0.377319	1.16068	-0.0181087
23400	0.738	0.1172	-0.0008		0.380412	1.16966	-0.0160966
23600	0.746	0.1183	-0.0008		0.384535	1.18064	-0.0160966
23800	0.754	0.1194	-0.0007		0.388659	1.19162	-0.0140845
24000	0.764	0.1204	-0.0007		0.393814	1.2016	-0.0140845
24200	0.774	0.1215	-0.0007		0.398968	1.21257	-0.0140845
24400	0.782	0.1226	-0.0006		0.403092	1.22355	-0.0120724
24600	0.792	0.1237	-0.0005		0.408247	1.23453	-0.0100604
24800	0.796	0.1246	-0.0005		0.410308	1.24351	-0.0100604
25000	0.802	0.1254	-0.0005		0.413401	1.2515	-0.0100604
25200	0.812	0.1265	-0.0005		0.418556	1.26248	-0.0100604
25400	0.82	0.1273	-0.0004		0.42268	1.27046	-0.00804829
25600	0.826	0.1284	-0.0003		0.425772	1.28144	-0.00603622
25800	0.836	0.1293	-0.0003		0.430927	1.29042	-0.00603622
26000	0.842	0.1304	-0.0003		0.43402	1.3014	-0.00603622
26200	0.85	0.1314	-0.0003		0.438143	1.31138	-0.00603622
26400	0.86	0.1324	-0.0001		0.443298	1.32136	-0.00201207
26600	0.868	0.1333	-0.0001		0.447422	1.33034	-0.00201207
26800	0.874	0.1344	-0.0001		0.450515	1.34132	-0.00201207
27000	0.88	0.1352	0		0.453607	1.3493	0
27200	0.892	0.1363	0.0001		0.459793	1.36028	0.00201207
27400	0.9	0.1373	0.0001		0.463917	1.37026	0.00201207
27600	0.906	0.1384	0.0001		0.467009	1.38124	0.00201207
27800	0.912	0.1394	0.0002		0.470102	1.39122	0.00402414
28000	0.924	0.1405	0.0003		0.476288	1.4022	0.00603622
28200	0.932	0.1414	0.0004		0.480411	1.41118	0.00804829
28400	0.942	0.1424	0.0005		0.485566	1.42116	0.0100604
28600	0.948	0.1434	0.0005		0.488659	1.43114	0.0100604
28800	0.956	0.1444	0.0004		0.492782	1.44112	0.00804829
29000	0.966	0.1454	0.0006		0.497937	1.4511	0.0120724
29200	0.974	0.1464	0.0006		0.502061	1.46108	0.0120724
29400	0.982	0.1473	0.0007		0.506184	1.47006	0.0140845
29600	0.99	0.1484	0.0007		0.510308	1.48104	0.0140845
29800	1	0.1493	0.0008		0.515463	1.49002	0.0160966
30000	1.006	0.1504	0.0009		0.518556	1.501	0.0181087
30200	1.018	0.1512	0.0008		0.524741	1.50898	0.0160966
30400	1.024	0.1523	0.001		0.527834	1.51996	0.0201207
30600	1.036	0.1534	0.0009		0.534019	1.53094	0.0181087
30800	1.044	0.1543	0.001		0.538143	1.53992	0.0201207
31000	1.048	0.1554	0.001		0.540205	1.5509	0.0201207
31200	1.058	0.1563	0.001		0.54536	1.55988	0.0201207
31400	1.068	0.1573	0.001		0.550514	1.56986	0.0201207
31600	1.078	0.1583	0.0012		0.555669	1.57984	0.0241449
31800	1.086	0.1592	0.0012		0.559793	1.58882	0.0241449
32000	1.096	0.1602	0.0012		0.564947	1.5988	0.0241449
32200	1.104	0.1612	0.0013		0.569071	1.60878	0.0261569
32400	1.112	0.1622	0.0014		0.573195	1.61876	0.028169
32600	1.124	0.1632	0.0014		0.57938	1.62874	0.028169
32800	1.136	0.1644	0.0015		0.585566	1.64072	0.0301811
33000	1.142	0.1654	0.0015		0.588659	1.6507	0.0301811
33200	1.154	0.1664	0.0015		0.594844	1.66068	0.0301811
33400	1.164	0.1674	0.0015		0.599999	1.67066	0.0301811
33600	1.17	0.1684	0.0016		0.603091	1.68064	0.0321932
33800	1.18	0.1694	0.0017		0.608246	1.69062	0.0342052
34000	1.19	0.1704	0.0017		0.613401	1.7006	0.0342052
34200	1.2	0.1713	0.0017		0.618555	1.70958	0.0342052
34400	1.21	0.1723	0.0018		0.62371	1.71956	0.0362173
34600	1.22	0.1733	0.0019		0.628865	1.72954	0.0382294
34800	1.23	0.1742	0.0018		0.634019	1.73852	0.0362173
35000	1.242	0.1752	0.0019		0.640205	1.7485	0.0382294
35200	1.252	0.1762	0.002		0.645359	1.75848	0.0402414
35400	1.258	0.1773	0.0021		0.648452	1.76946	0.0422535
35600	1.27	0.1782	0.0021		0.654638	1.77844	0.0422535
35800	1.28	0.1793	0.0022		0.659792	1.78942	0.0442656
36000	1.29	0.1803	0.0022		0.664947	1.7994	0.0442656
36200	1.3	0.1813	0.0023		0.670102	1.80938	0.0462777
36400	1.312	0.1823	0.0023		0.676287	1.81936	0.0462777
36600	1.32	0.1833	0.0024		0.680411	1.82934	0.0482897
36800	1.332	0.1843	0.0024		0.686596	1.83932	0.0482897
37000	1.34	0.1852	0.0025		0.69072	1.8483	0.0503018
37200	1.35	0.1862	0.0026		0.695875	1.85828	0.0523139
37400	1.36	0.1873	0.0026		0.701029	1.86926	0.0523139
37600	1.37	0.1882	0.0026		0.706184	1.87824	0.0523139
37800	1.38	0.1893	0.0028		0.711339	1.88922	0.056338
38000	1.388	0.1902	0.0028		0.715462	1.8982	0.056338
38200	1.398	0.1913	0.0029		0.720617	1.90918	0.0583501
38400	1.412	0.1923	0.0028		0.727833	1.91916	0.056338
38600	1.424	0.1934	0.0029		0.734019	1.93014	0.0583501
38800	1.43	0.1941	0.0031		0.737112	1.93713	0.0623742
39000	1.442	0.1953	0.0031		0.743297	1.9491	0.0623742
39200	1.452	0.1963	0.0032		0.748452	1.95908	0.0643863
39400	1.464	0.1973	0.0032		0.754638	1.96906	0.0643863
39600	1.472	0.1983	0.0034		0.758761	1.97904	0.0684105
39800	1.482	0.1992	0.0035		0.763916	1.98802	0.0704225
40000	1.49	0.2003	0.0035		0.76804	1.999	0.0704225
40200	1.498	0.2011	0.0035		0.772163	2.00699	0.0704225
40400	1.51	0.202	0.0037		0.778349	2.01597	0.0744467
40600	1.52	0.2031	0.0037		0.783503	2.02695	0.0744467
40800	1.534	0.2041	0.0038		0.79072	2.03693	0.0764588
41000	1.542	0.2051	0.0039		0.794844	2.04691	0.0784708
41200	1.554	0.2062	0.0041		0.801029	2.05788	0.082495
41400	1.566	0.2074	0.0041		0.807215	2.06986	0.082495
41600	1.574	0.2082	0.0041		0.811338	2.07784	0.082495
41800	1.586	0.2092	0.0043		0.817524	2.08782	0.0865191
42000	1.594	0.2104	0.0044		0.821648	2.0998	0.0885312
42200	1.61	0.2112	0.0045		0.829895	2.10778	0.0905433
42400	1.618	0.2122	0.0046		0.834019	2.11776	0.0925553
42600	1.628	0.2132	0.0045		0.839173	2.12774	0.0905433
42800	1.638	0.2142	0.0047		0.844328	2.13772	0.0945674
43000	1.652	0.2152	0.0048		0.851545	2.1477	0.0965795
43200	1.66	0.2162	0.0049		0.855668	2.15768	0.0985915
43400	1.67	0.217	0.0049		0.860823	2.16567	0.0985915
43600	1.684	0.2181	0.005		0.868039	2.17665	0.100604
43800	1.696	0.219	0.005		0.874225	2.18563	0.100604
44000	1.71	0.2202	0.0051		0.881441	2.1976	0.102616
44200	1.72	0.2212	0.0053		0.886596	2.20758	0.10664
44400	1.732	0.2222	0.0053		0.892782	2.21756	0.10664
44600	1.742	0.2232	0.0054		0.897936	2.22754	0.108652
44800	1.754	0.2243	0.0055		0.904122	2.23852	0.110664
45000	1.766	0.2252	0.0056		0.910307	2.2475	0.112676
45200	1.776	0.2262	0.0057		0.915462	2.25749	0.114688
45400	1.784	0.2272	0.0057		0.919586	2.26747	0.114688
45600	1.794	0.2282	0.0059		0.92474	2.27745	0.118712
45800	1.81	0.2292	0.0059		0.932988	2.28743	0.118712
46000	1.82	0.2303	0.0061		0.938142	2.2984	0.122736
46200	1.832	0.2312	0.0062		0.944328	2.30739	0.124748
46400	1.842	0.2322	0.0063		0.949483	2.31737	0.126761
46600	1.858	0.2332	0.0063		0.95773	2.32735	0.126761
46800	1.868	0.2342	0.0064		0.962885	2.33733	0.128773
47000	1.88	0.235	0.0066		0.96907	2.34531	0.132797
47200	1.896	0.2361	0.0066		0.977317	2.35629	0.132797
47400	1.906	0.2372	0.0067		0.982472	2.36727	0.134809
47600	1.92	0.2383	0.0068		0.989689	2.37824	0.136821
47800	1.928	0.2391	0.0069		0.993812	2.38623	0.138833
48000	1.94	0.2403	0.0069		0.999998	2.3982	0.138833
48200	1.95	0.2411	0.007		1.00515	2.40619	0.140845
48400	1.964	0.2422	0.0071		1.01237	2.41717	0.142857
48600	1.976	0.2431	0.0072		1.01855	2.42615	0.144869
48800	1.988	0.2442	0.0073		1.02474	2.43713	0.146881
49000	1.998	0.2451	0.0074		1.02989	2.44611	0.148893
49200	2.01	0.246	0.0075		1.03608	2.45509	0.150905
49400	2.024	0.2471	0.0076		1.0433	2.46607	0.152918
49600	2.036	0.2481	0.0076		1.04948	2.47605	0.152918
49800	2.046	0.2491	0.0078		1.05464	2.48603	0.156942
50000	2.058	0.2501	0.0077		1.06082	2.49601	0.15493
50200	2.07	0.2509	0.0078		1.06701	2.50399	0.156942
50400	2.084	0.2521	0.0079		1.07422	2.51597	0.158954
50600	2.096	0.2532	0.008		1.08041	2.52695	0.160966
50800	2.108	0.2541	0.0081		1.0866	2.53593	0.162978
51000	2.12	0.2551	0.0081		1.09278	2.54591	0.162978
51200	2.132	0.2561	0.0083		1.09897	2.55589	0.167002
51400	2.144	0.2571	0.0083		1.10515	2.56587	0.167002
51600	2.158	0.2581	0.0084		1.11237	2.57585	0.169014
51800	2.174	0.2591	0.0084		1.12062	2.58583	0.169014
52000	2.184	0.2601	0.0085		1.12577	2.59581	0.171026
52200	2.196	0.2611	0.0086		1.13196	2.60579	0.173038
52400	2.212	0.2622	0.0086		1.1402	2.61677	0.173038
52600	2.224	0.2631	0.0087		1.14639	2.62575	0.17505
52800	2.234	0.2642	0.0088		1.15154	2.63673	0.177062
53000	2.246	0.2651	0.0089		1.15773	2.64571	0.179074
53200	2.26	0.2662	0.0089		1.16495	2.65669	0.179074
53400	2.274	0.2672	0.0091		1.17216	2.66667	0.183099
53600	2.284	0.2682	0.0091		1.17732	2.67665	0.183099
53800	2.294	0.269	0.0092		1.18247	2.68463	0.185111
54000	2.31	0.27	0.0092		1.19072	2.69461	0.185111
54200	2.322	0.2709	0.0093		1.1969	2.70359	0.187123
54400	2.338	0.272	0.0094		1.20515	2.71457	0.189135
54600	2.35	0.273	0.0094		1.21134	2.72455	0.189135
54800	2.362	0.274	0.0095		1.21752	2.73453	0.191147
55000	2.378	0.275	0.0096		1.22577	2.74451	0.193159
55200	2.388	0.2761	0.0096		1.23093	2.75549	0.193159
55400	2.4	0.2771	0.0098		1.23711	2.76547	0.197183
55600	2.416	0.2779	0.0098		1.24536	2.77345	0.197183
55800	2.428	0.2788	0.0099		1.25154	2.78244	0.199195
56000	2.44	0.28	0.01		1.25773	2.79441	0.201207
56200	2.454	0.2808	0.0101		1.26495	2.8024	0.203219
56400	2.466	0.282	0.0101		1.27113	2.81437	0.203219
56600	2.482	0.283	0.0102		1.27938	2.82435	0.205231
56800	2.492	0.284	0.0103		1.28453	2.83433	0.207243
57000	2.504	0.285	0.0104		1.29072	2.84431	0.209256
57200	2.518	0.2859	0.0104		1.29794	2.85329	0.209256
57400	2.536	0.2871	0.0104		1.30721	2.86527	0.209256
57600	2.55	0.2882	0.0106		1.31443	2.87625	0.21328
57800	2.564	0.2891	0.0107		1.32165	2.88523	0.215292
58000	2.576	0.2901	0.0107		1.32783	2.89521	0.215292
58200	2.592	0.2913	0.0108		1.33608	2.90719	0.217304
58400	2.604	0.2923	0.0108		1.34227	2.91717	0.217304
58600	2.618	0.2933	0.011		1.34948	2.92715	0.221328
58800	2.632	0.2941	0.011		1.3567	2.93513	0.221328
59000	2.644	0.2951	0.0111		1.36288	2.94511	0.22334
59200	2.654	0.2961	0.0112		1.36804	2.95509	0.225352
59400	2.674	0.297	0.0112		1.37835	2.96407	0.225352
59600	2.68	0.298	0.0113		1.38144	2.97405	0.227364
59800	2.694	0.2991	0.0114		1.38866	2.98503	0.229376
60000	2.71	0.3001	0.0114		1.3969	2.99501	0.229376
60200	2.72	0.3011	0.0115		1.40206	3.00499	0.231388
60400	2.734	0.3021	0.0116		1.40928	3.01497	0.2334
60600	2.75	0.303	0.0117		1.41752	3.02395	0.235412
60800	2.766	0.304	0.0117		1.42577	3.03393	0.235412
61000	2.778	0.3053	0.0118		1.43196	3.04691	0.237425
61200	2.794	0.3061	0.0118		1.4402	3.05489	0.237425
61400	2.806	0.3072	0.012		1.44639	3.06587	0.241449
61600	2.824	0.3081	0.0121		1.45567	3.07485	0.243461
61800	2.836	0.3091	0.0121		1.46185	3.08483	0.243461
62000	2.85	0.3101	0.0122		1.46907	3.09481	0.245473
62200	2.866	0.3111	0.0123		1.47732	3.10479	0.247485
62400	2.878	0.3121	0.0124		1.4835	3.11477	0.249497
62600	2.892	0.3131	0.0124		1.49072	3.12475	0.249497
62800	2.91	0.3141	0.0125		1.5	3.13473	0.251509
63000	2.924	0.3151	0.0126		1.50721	3.14471	0.253521
63200	2.936	0.3161	0.0127		1.5134	3.15469	0.255533
63400	2.952	0.3172	0.0127		1.52165	3.16567	0.255533
63600	2.962	0.3181	0.0128		1.5268	3.17465	0.257545
63800	2.976	0.3191	0.0128		1.53402	3.18463	0.257545
64000	2.99	0.3201	0.0129		1.54123	3.19461	0.259557
64200	3.004	0.3209	0.013		1.54845	3.20259	0.261569
64400	3.022	0.3219	0.0131		1.55773	3.21257	0.263581
64600	3.034	0.323	0.0131		1.56391	3.22355	0.263581
64800	3.052	0.3241	0.0132		1.57319	3.23453	0.265594
65000	3.066	0.325	0.0132		1.58041	3.24351	0.265594
65200	3.082	0.3262	0.0134		1.58866	3.25549	0.269618
65400	3.096	0.3271	0.0134		1.59587	3.26447	0.269618
65600	3.11	0.3282	0.0136		1.60309	3.27545	0.273642
65800	3.128	0.329	0.0136		1.61237	3.28343	0.273642
66000	3.14	0.33	0.0137		1.61855	3.29341	0.275654
66200	3.158	0.3312	0.0137		1.62783	3.30539	0.275654
66400	3.172	0.3322	0.0138		1.63505	3.31537	0.277666
66600	3.186	0.3332	0.0139		1.64226	3.32535	0.279678
66800	3.2	0.3342	0.0139		1.64948	3.33533	0.279678
67000	3.218	0.3351	0.014		1.65876	3.34431	0.28169
67200	3.232	0.3361	0.0141		1.66598	3.35429	0.283702
67400	3.248	0.3371	0.0141		1.67422	3.36427	0.283702
67600	3.262	0.3381	0.0143		1.68144	3.37425	0.287726
67800	3.274	0.3391	0.0143		1.68763	3.38423	0.287726
68000	3.29	0.3401	0.0145		1.69587	3.39421	0.291751
68200	3.304	0.341	0.0145		1.70309	3.40319	0.291751
68400	3.32	0.342	0.0146		1.71134	3.41317	0.293763
68600	3.336	0.3431	0.0146		1.71958	3.42415	0.293763
68800	3.352	0.3441	0.0147		1.72783	3.43413	0.295775
69000	3.366	0.3451	0.0147		1.73505	3.44411	0.295775
69200	3.382	0.3461	0.0148		1.7433	3.45409	0.297787
69400	3.398	0.347	0.0149		1.75154	3.46307	0.299799
69600	3.416	0.3482	0.015		1.76082	3.47505	0.301811
69800	3.43	0.3491	0.015		1.76804	3.48403	0.301811
70000	3.442	0.3499	0.0151		1.77422	3.49202	0.303823
70200	3.458	0.351	0.0151		1.78247	3.50299	0.303823
70400	3.474	0.352	0.0152		1.79072	3.51297	0.305835
70600	3.494	0.3531	0.0154		1.80103	3.52395	0.309859
70800	3.506	0.3541	0.0155		1.80721	3.53393	0.311871
71000	3.518	0.355	0.0157		1.8134	3.54291	0.315895
71200	3.53	0.356	0.016		1.81958	3.55289	0.321932
71400	3.544	0.357	0.0161		1.8268	3.56287	0.323944
71600	3.558	0.3581	0.0162		1.83402	3.57385	0.325956
71800	3.57	0.359	0.0163		1.8402	3.58283	0.327968
72000	3.58	0.3601	0.0165		1.84536	3.59381	0.331992
72200	3.592	0.3613	0.0167		1.85154	3.60579	0.336016
72400	3.6	0.3619	0.0169		1.85567	3.61178	0.34004
72600	3.614	0.3629	0.017		1.86288	3.62176	0.342052
72800	3.632	0.3639	0.0171		1.87216	3.63174	0.344064
73000	3.648	0.3649	0.0172		1.88041	3.64172	0.346076
73200	3.666	0.3659	0.0173		1.88969	3.6517	0.348089
73400	3.682	0.367	0.0173		1.89793	3.66267	0.348089
73600	3.7	0.3679	0.0174		1.90721	3.67166	0.350101
73800	3.714	0.369	0.0175		1.91443	3.68263	0.352113
74000	3.732	0.3699	0.0177		1.92371	3.69162	0.356137
74200	3.746	0.3709	0.0177		1.93092	3.7016	0.356137
74400	3.756	0.3718	0.0178		1.93608	3.71058	0.358149
74600	3.776	0.3728	0.0179		1.94639	3.72056	0.360161
74800	3.792	0.3738	0.018		1.95463	3.73054	0.362173
75000	3.81	0.3748	0.018		1.96391	3.74052	0.362173
75200	3.824	0.3758	0.0181		1.97113	3.7505	0.364185
75400	3.842	0.3768	0.0181		1.98041	3.76048	0.364185
75600	3.858	0.3778	0.0182		1.98866	3.77046	0.366197
75800	3.876	0.379	0.0182		1.99793	3.78244	0.366197
76000	3.89	0.38	0.0184		2.00515	3.79242	0.370221
76200	3.91	0.3809	0.0184		2.01546	3.8014	0.370221
76400	3.924	0.3818	0.0185		2.02268	3.81038	0.372233
76600	3.94	0.383	0.0186		2.03092	3.82236	0.374245
76800	3.956	0.3839	0.0186		2.03917	3.83134	0.374245
77000	3.976	0.385	0.0187		2.04948	3.84232	0.376258
77200	3.99	0.3859	0.0188		2.0567	3.8513	0.37827
77400	4.008	0.387	0.0189		2.06597	3.86228	0.380282
77600	4.024	0.3879	0.0189		2.07422	3.87126	0.380282
77800	4.042	0.389	0.019		2.0835	3.88224	0.382294
78000	4.058	0.39	0.0191		2.09175	3.89222	0.384306
78200	4.078	0.3911	0.0192		2.10206	3.90319	0.386318
78400	4.092	0.3921	0.0193		2.10927	3.91317	0.38833
78600	4.114	0.393	0.0193		2.12061	3.92216	0.38833
78800	4.126	0.3939	0.0193		2.1268	3.93114	0.38833
79000	4.14	0.3949	0.0194		2.13402	3.94112	0.390342
79200	4.162	0.3959	0.0194		2.14536	3.9511	0.390342
79400	4.18	0.397	0.0196		2.15463	3.96208	0.394366
79600	4.194	0.3978	0.0197		2.16185	3.97006	0.396378
79800	4.214	0.399	0.0197		2.17216	3.98204	0.396378
80000	4.232	0.3999	0.0198		2.18144	3.99102	0.39839
80200	4.248	0.4009	0.0199		2.18969	4.001	0.400402
80400	4.264	0.4019	0.0199		2.19793	4.01098	0.400402
80600	4.278	0.4029	0.02		2.20515	4.02096	0.402414
80800	4.296	0.4038	0.0201		2.21443	4.02994	0.404427
81000	4.314	0.4047	0.0201		2.22371	4.03892	0.404427
81200	4.332	0.4059	0.0202		2.23298	4.0509	0.406439
81400	4.35	0.4069	0.0203		2.24226	4.06088	0.408451
81600	4.366	0.4077	0.0203		2.25051	4.06886	0.408451
81800	4.386	0.4087	0.0204		2.26082	4.07884	0.410463
82000	4.406	0.4098	0.0205		2.27113	4.08982	0.412475
82200	4.422	0.4107	0.0206		2.27938	4.0988	0.414487
82400	4.444	0.4118	0.0207		2.29072	4.10978	0.416499
82600	4.46	0.4128	0.0207		2.29896	4.11976	0.416499
82800	4.478	0.4138	0.0208		2.30824	4.12974	0.418511
83000	4.494	0.4148	0.0209		2.31649	4.13972	0.420523
83200	4.51	0.4159	0.0209		2.32474	4.1507	0.420523
83400	4.528	0.4168	0.0211		2.33402	4.15968	0.424547
83600	4.544	0.4179	0.0211		2.34226	4.17066	0.424547
83800	4.56	0.4188	0.0212		2.35051	4.17964	0.426559
84000	4.58	0.4197	0.0212		2.36082	4.18862	0.426559
84200	4.596	0.4208	0.0213		2.36907	4.1996	0.428571
84400	4.612	0.4218	0.0214		2.37731	4.20958	0.430584
84600	4.632	0.4228	0.0215		2.38762	4.21956	0.432596
84800	4.65	0.4237	0.0215		2.3969	4.22854	0.432596
85000	4.66	0.4248	0.0215		2.40206	4.23952	0.432596
85200	4.676	0.4258	0.0216		2.4103	4.2495	0.434608
85400	4.69	0.4268	0.0217		2.41752	4.25948	0.43662
85600	4.712	0.4276	0.0218		2.42886	4.26747	0.438632
85800	4.726	0.4288	0.0219		2.43608	4.27944	0.440644
86000	4.74	0.4298	0.0221		2.44329	4.28942	0.444668
86200	4.758	0.4307	0.0222		2.45257	4.2984	0.44668
86400	4.772	0.4318	0.0224		2.45979	4.30938	0.450704
86600	4.792	0.4328	0.0226		2.4701	4.31936	0.454728
86800	4.81	0.4338	0.0225		2.47938	4.32934	0.452716
87000	4.828	0.4348	0.0227		2.48865	4.33932	0.45674
87200	4.846	0.4358	0.0227		2.49793	4.3493	0.45674
87400	4.864	0.4368	0.0228		2.50721	4.35928	0.458753
87600	4.88	0.4377	0.0228		2.51546	4.36826	0.458753
87800	4.902	0.4388	0.023		2.5268	4.37924	0.462777
88000	4.918	0.4397	0.023		2.53505	4.38822	0.462777
88200	4.938	0.4408	0.023		2.54536	4.3992	0.462777
88400	4.96	0.4418	0.0231		2.5567	4.40918	0.464789
88600	4.974	0.4427	0.0232		2.56391	4.41816	0.466801
88800	4.994	0.4437	0.0232		2.57422	4.42814	0.466801
89000	5.01	0.4447	0.0233		2.58247	4.43812	0.468813
89200	5.032	0.4457	0.0233		2.59381	4.4481	0.468813
89400	5.052	0.4467	0.0234		2.60412	4.45808	0.470825
89600	5.07	0.4477	0.0235		2.6134	4.46806	0.472837
89800	5.092	0.4489	0.0236		2.62474	4.48004	0.474849
90000	5.11	0.4499	0.0236		2.63401	4.49002	0.474849
90200	5.126	0.4507	0.0237		2.64226	4.498	0.476861
90400	5.146	0.4519	0.0238		2.65257	4.50998	0.478873
90600	5.166	0.4528	0.0238		2.66288	4.51896	0.478873
90800	5.184	0.4539	0.0239		2.67216	4.52994	0.480885
91000	5.206	0.4547	0.0239		2.6835	4.53792	0.480885
91200	5.222	0.4558	0.024		2.69175	4.5489	0.482897
91400	5.24	0.4567	0.0241		2.70103	4.55788	0.484909
91600	5.258	0.4577	0.0242		2.7103	4.56786	0.486922
91800	5.278	0.4587	0.0243		2.72061	4.57784	0.488934
92000	5.298	0.4597	0.0243		2.73092	4.58782	0.488934
92200	5.318	0.4609	0.0243		2.74123	4.5998	0.488934
92400	5.338	0.4619	0.0244		2.75154	4.60978	0.490946
92600	5.358	0.4629	0.0244		2.76185	4.61976	0.490946
92800	5.374	0.4638	0.0245		2.7701	4.62874	0.492958
93000	5.394	0.4647	0.0245		2.78041	4.63772	0.492958
93200	5.412	0.4658	0.0246		2.78968	4.6487	0.49497
93400	5.434	0.4669	0.0247		2.80102	4.65968	0.496982
93600	5.452	0.4679	0.0248		2.8103	4.66966	0.498994
93800	5.472	0.4689	0.0248		2.82061	4.67964	0.498994
94000	5.49	0.4698	0.0249		2.82989	4.68862	0.501006
94200	5.508	0.4708	0.025		2.83917	4.6986	0.503018
94400	5.526	0.4718	0.0251		2.84845	4.70858	0.50503
94600	5.548	0.4729	0.0251		2.85979	4.71956	0.50503
94800	5.57	0.474	0.0252		2.87113	4.73054	0.507042
95000	5.586	0.4748	0.0253		2.87938	4.73852	0.509054
95200	5.604	0.4759	0.0253		2.88865	4.7495	0.509054
95400	5.624	0.4767	0.0255		2.89896	4.75749	0.513078
95600	5.646	0.4777	0.0255		2.9103	4.76747	0.513078
95800	5.664	0.4787	0.0255		2.91958	4.77745	0.513078
96000	5.684	0.4797	0.0256		2.92989	4.78743	0.515091
96200	5.704	0.4808	0.0256		2.9402	4.7984	0.515091
96400	5.72	0.4819	0.026		2.94845	4.80938	0.523139
96600	5.732	0.4827	0.0262		2.95463	4.81737	0.527163
96800	5.754	0.4838	0.0263		2.96597	4.82834	0.529175
97000	5.772	0.4849	0.0265		2.97525	4.83932	0.533199
97200	5.792	0.4857	0.0265		2.98556	4.84731	0.533199
97400	5.81	0.4867	0.0265		2.99484	4.85729	0.533199
97600	5.834	0.4878	0.0266		3.00721	4.86826	0.535211
97800	5.85	0.4887	0.0267		3.01546	4.87725	0.537223
98000	5.87	0.4897	0.0268		3.02577	4.88723	0.539235
98200	5.89	0.4907	0.0268		3.03608	4.89721	0.539235
98400	5.912	0.4918	0.0269		3.04742	4.90818	0.541247
98600	5.93	0.4928	0.027		3.05669	4.91816	0.54326
98800	5.95	0.4937	0.0271		3.067	4.92715	0.545272
99000	5.972	0.4949	0.0271		3.07834	4.93912	0.545272
99200	5.986	0.4959	0.0272		3.08556	4.9491	0.547284
99400	6.006	0.4967	0.0272		3.09587	4.95709	0.547284
99600	6.022	0.4978	0.0273		3.10412	4.96806	0.549296
99800	6.038	0.4989	0.0274		3.11236	4.97904	0.551308
100000	6.058	0.4996	0.0275		3.12267	4.98603	0.55332
100200	6.08	0.5008	0.0276		3.13401	4.998	0.555332
100400	6.104	0.5021	0.0277		3.14639	5.01098	0.557344
100600	6.116	0.5029	0.0278		3.15257	5.01896	0.559356
100800	6.13	0.5038	0.0279		3.15979	5.02794	0.561368
101000	6.152	0.5048	0.028		3.17113	5.03792	0.56338
101200	6.17	0.5057	0.028		3.18041	5.04691	0.56338
101400	6.192	0.5067	0.0281		3.19175	5.05689	0.565392
101600	6.212	0.5077	0.0282		3.20206	5.06687	0.567404
101800	6.234	0.5088	0.0282		3.2134	5.07784	0.567404
102000	6.256	0.5098	0.0283		3.22474	5.08782	0.569416
102200	6.278	0.5108	0.0284		3.23608	5.0978	0.571429
102400	6.298	0.5118	0.0284		3.24638	5.10778	0.571429
102600	6.316	0.5129	0.0286		3.25566	5.11876	0.575453
102800	6.34	0.5137	0.0286		3.26803	5.12675	0.575453
103000	6.358	0.5148	0.0286		3.27731	5.13772	0.575453
103200	6.376	0.5157	0.0287		3.28659	5.14671	0.577465
103400	6.394	0.5167	0.0289		3.29587	5.15669	0.581489
103600	6.416	0.5176	0.0288		3.30721	5.16567	0.579477
103800	6.44	0.5188	0.0289		3.31958	5.17764	0.581489
104000	6.458	0.5198	0.029		3.32886	5.18762	0.583501
104200	6.478	0.5208	0.029		3.33917	5.1976	0.583501
104400	6.498	0.5218	0.0291		3.34948	5.20758	0.585513
104600	6.514	0.5227	0.0292		3.35772	5.21657	0.587525
104800	6.532	0.5237	0.0293		3.367	5.22655	0.589537
105000	6.55	0.5248	0.0293		3.37628	5.23752	0.589537
105200	6.568	0.5257	0.0294		3.38556	5.24651	0.591549
105400	6.588	0.5267	0.0294		3.39587	5.25649	0.591549
105600	6.61	0.5278	0.0296		3.40721	5.26747	0.595573
105800	6.63	0.5289	0.0296		3.41752	5.27844	0.595573
106000	6.648	0.5298	0.0296		3.4268	5.28743	0.595573
106200	6.668	0.5308	0.0297		3.43711	5.29741	0.597586
106400	6.69	0.5317	0.0297		3.44845	5.30639	0.597586
106600	6.712	0.5328	0.0298		3.45979	5.31737	0.599598
106800	6.736	0.5337	0.0298		3.47216	5.32635	0.599598
107000	6.756	0.5347	0.03		3.48247	5.33633	0.603622
107200	6.776	0.5358	0.03		3.49278	5.34731	0.603622
107400	6.792	0.5367	0.0301		3.50102	5.35629	0.605634
107600	6.812	0.5376	0.0301		3.51133	5.36527	0.605634
107800	6.838	0.5387	0.0301		3.52473	5.37625	0.605634
108000	6.86	0.5398	0.0302		3.53607	5.38723	0.607646
108200	6.88	0.5407	0.0303		3.54638	5.39621	0.609658
108400	6.9	0.5418	0.0304		3.55669	5.40719	0.61167
108600	6.924	0.5428	0.0304		3.56906	5.41717	0.61167
108800	6.942	0.5437	0.0304		3.57834	5.42615	0.61167
109000	6.964	0.5448	0.0305		3.58968	5.43713	0.613682
109200	6.984	0.5458	0.0305		3.59999	5.44711	0.613682
109400	7.004	0.5468	0.0306		3.6103	5.45709	0.615694
109600	7.024	0.5478	0.0307		3.62061	5.46707	0.617706
109800	7.044	0.5488	0.0306		3.63092	5.47705	0.615694
110000	7.064	0.5498	0.0307		3.64123	5.48703	0.617706
110200	7.084	0.5507	0.0307		3.65154	5.49601	0.617706
110400	7.104	0.5518	0.0308		3.66185	5.50699	0.619718
110600	7.128	0.5528	0.0309		3.67422	5.51697	0.62173
110800	7.148	0.5536	0.031		3.68453	5.52495	0.623742
111000	7.168	0.5547	0.031		3.69484	5.53593	0.623742
111200	7.19	0.5558	0.0311		3.70618	5.54691	0.625755
111400	7.21	0.5568	0.0311		3.71649	5.55689	0.625755
111600	7.234	0.5577	0.0313		3.72886	5.56587	0.629779
111800	7.254	0.5587	0.0313		3.73917	5.57585	0.629779
112000	7.27	0.5596	0.0313		3.74741	5.58483	0.629779
112200	7.294	0.5608	0.0314		3.75979	5.59681	0.631791
112400	7.318	0.5619	0.0315		3.77216	5.60778	0.633803
112600	7.334	0.5626	0.0316		3.7804	5.61477	0.635815
112800	7.356	0.5637	0.0317		3.79174	5.62575	0.637827
113000	7.376	0.5646	0.0318		3.80205	5.63473	0.639839
113200	7.394	0.5656	0.0317		3.81133	5.64471	0.637827
113400	7.416	0.5666	0.0319		3.82267	5.65469	0.641851
113600	7.44	0.5677	0.032		3.83504	5.66567	0.643863
113800	7.46	0.5687	0.0321		3.84535	5.67565	0.645875
114000	7.48	0.5696	0.0321		3.85566	5.68463	0.645875
114200	7.498	0.5706	0.0322		3.86494	5.69461	0.647887
114400	7.522	0.5715	0.0323		3.87731	5.70359	0.649899
114600	7.544	0.5725	0.0324		3.88865	5.71357	0.651911
114800	7.568	0.5735	0.0325		3.90102	5.72355	0.653924
115000	7.59	0.5745	0.0325		3.91236	5.73353	0.653924
115200	7.608	0.5757	0.0325		3.92164	5.74551	0.653924
115400	7.63	0.5766	0.0327		3.93298	5.75449	0.657948
115600	7.654	0.5776	0.0327		3.94535	5.76447	0.657948
115800	7.676	0.5786	0.0328		3.95669	5.77445	0.65996
116000	7.692	0.5795	0.0328		3.96494	5.78343	0.65996
116200	7.716	0.5805	0.033		3.97731	5.79341	0.663984
116400	7.738	0.5815	0.033		3.98865	5.80339	0.663984
116600	7.758	0.5825	0.0331		3.99896	5.81337	0.665996
116800	7.78	0.5835	0.0331		4.0103	5.82335	0.665996
117000	7.8	0.5846	0.0332		4.02061	5.83433	0.668008
117200	7.824	0.5855	0.0334		4.03298	5.84331	0.672032
117400	7.84	0.5865	0.0335		4.04123	5.85329	0.674044
117600	7.864	0.5875	0.0335		4.0536	5.86327	0.674044
117800	7.882	0.5885	0.0335		4.06288	5.87325	0.674044
118000	7.904	0.5894	0.0337		4.07422	5.88224	0.678068
118200	7.93	0.5904	0.0337		4.08762	5.89222	0.678068
118400	7.95	0.5915	0.0338		4.09793	5.90319	0.68008
118600	7.974	0.5926	0.034		4.1103	5.91417	0.684105
118800	7.992	0.5936	0.034		4.11958	5.92415	0.684105
119000	7.992	0.5947	0.0355		4.11958	5.93513	0.714286
119200	8.006	0.5957	0.0359		4.1268	5.94511	0.722334
119400	8.02	0.5967	0.0362		4.13401	5.95509	0.72837
119600	8.04	0.5975	0.0364		4.14432	5.96307	0.732394
119800	8.064	0.5986	0.0365		4.15669	5.97405	0.734406
120000	8.082	0.5995	0.0367		4.16597	5.98303	0.738431
120200	8.104	0.6006	0.0368		4.17731	5.99401	0.740443
120400	8.124	0.6016	0.037		4.18762	6.00399	0.744467
120600	8.142	0.6024	0.037		4.1969	6.01198	0.744467
120800	8.164	0.6034	0.0371		4.20824	6.02196	0.746479
121000	8.188	0.6045	0.0372		4.22061	6.03293	0.748491
121200	8.21	0.6054	0.0374		4.23195	6.04192	0.752515
121400	8.228	0.6065	0.0375		4.24123	6.05289	0.754527
121600	8.25	0.6075	0.0376		4.25257	6.06287	0.756539
121800	8.278	0.6085	0.0377		4.267	6.07285	0.758551
122000	8.298	0.6096	0.0378		4.27731	6.08383	0.760563
122200	8.32	0.6105	0.038		4.28865	6.09281	0.764588
122400	8.338	0.6116	0.0381		4.29793	6.10379	0.7666
122600	8.36	0.6126	0.0383		4.30927	6.11377	0.770624
122800	8.378	0.6135	0.0384		4.31855	6.12275	0.772636
123000	8.4	0.6145	0.0386		4.32989	6.13273	0.77666
123200	8.42	0.6155	0.0387		4.3402	6.14271	0.778672
123400	8.442	0.6166	0.0388		4.35154	6.15369	0.780684
123600	8.466	0.6176	0.039		4.36391	6.16367	0.784708
123800	8.488	0.6185	0.0391		4.37525	6.17265	0.78672
124000	8.504	0.6195	0.0393		4.3835	6.18263	0.790744
124200	8.53	0.6205	0.0394		4.3969	6.19261	0.792757
124400	8.556	0.6217	0.0395		4.4103	6.20459	0.794769
124600	8.576	0.6226	0.0396		4.42061	6.21357	0.796781
124800	8.6	0.6237	0.0398		4.43298	6.22455	0.800805
125000	8.618	0.6246	0.0398		4.44226	6.23353	0.800805
125200	8.64	0.6256	0.04		4.4536	6.24351	0.804829
125400	8.658	0.6265	0.04		4.46288	6.2525	0.804829
125600	8.682	0.6275	0.0402		4.47525	6.26248	0.808853
125800	8.706	0.6286	0.0403		4.48762	6.27345	0.810865
126000	8.728	0.6296	0.0404		4.49896	6.28343	0.812877
126200	8.752	0.6306	0.0406		4.51133	6.29341	0.816901
126400	8.768	0.6316	0.0407		4.51958	6.30339	0.818913
126600	8.794	0.6327	0.0408		4.53298	6.31437	0.820926
126800	8.814	0.6335	0.0409		4.54329	6.32236	0.822938
127000	8.836	0.6345	0.0411		4.55463	6.33234	0.826962
127200	8.858	0.6356	0.0411		4.56597	6.34331	0.826962
127400	8.88	0.6366	0.0413		4.57731	6.35329	0.830986
127600	8.904	0.6377	0.0414		4.58968	6.36427	0.832998
127800	8.92	0.6385	0.0416		4.59793	6.37226	0.837022
128000	8.94	0.6395	0.0417		4.60824	6.38224	0.839034
128200	8.96	0.6405	0.0419		4.61855	6.39222	0.843058
128400	8.982	0.6416	0.0423		4.62989	6.40319	0.851107
128600	9	0.6426	0.0427		4.63917	6.41317	0.859155
128800	9.022	0.6436	0.0431		4.65051	6.42315	0.867203
129000	9.038	0.6446	0.0432		4.65875	6.43313	0.869215
129200	9.058	0.6455	0.0434		4.66906	6.44212	0.873239
129400	9.078	0.6465	0.0435		4.67937	6.4521	0.875252
129600	9.1	0.6476	0.0437		4.69071	6.46307	0.879276
129800	9.12	0.6485	0.0439		4.70102	6.47206	0.8833
130000	9.14	0.6495	0.0441		4.71133	6.48204	0.887324
130200	9.16	0.6504	0.0444		4.72164	6.49102	0.89336
130400	9.186	0.6516	0.0445		4.73504	6.50299	0.895372
130600	9.206	0.6525	0.0446		4.74535	6.51198	0.897384
130800	9.224	0.6535	0.0448		4.75463	6.52196	0.901408
131000	9.242	0.6544	0.0451		4.76391	6.53094	0.907445
131200	9.266	0.6554	0.0453		4.77628	6.54092	0.911469
131400	9.286	0.6564	0.0454		4.78659	6.5509	0.913481
131600	9.306	0.6573	0.0455		4.7969	6.55988	0.915493
131800	9.33	0.6584	0.0457		4.80927	6.57086	0.919517
132000	9.35	0.6593	0.0459		4.81958	6.57984	0.923541
132200	9.368	0.6604	0.0461		4.82886	6.59082	0.927565
132400	9.392	0.6613	0.0463		4.84123	6.5998	0.93159
132600	9.416	0.6624	0.0464		4.8536	6.61078	0.933602
132800	9.44	0.6635	0.0466		4.86597	6.62176	0.937626
133000	9.464	0.6646	0.0467		4.87834	6.63273	0.939638
133200	9.484	0.6654	0.0468		4.88865	6.64072	0.94165
133400	9.504	0.6665	0.0469		4.89896	6.6517	0.943662
133600	9.528	0.6674	0.0471		4.91133	6.66068	0.947686
133800	9.554	0.6687	0.0472		4.92473	6.67365	0.949698
134000	9.576	0.6697	0.0474		4.93607	6.68363	0.953722
134200	9.596	0.6709	0.0476		4.94638	6.69561	0.957746
134400	9.614	0.6718	0.0477		4.95566	6.70459	0.959759
134600	9.63	0.6727	0.0479		4.96391	6.71357	0.963783
134800	9.648	0.6734	0.0479		4.97319	6.72056	0.963783
135000	9.666	0.6744	0.0481		4.98246	6.73054	0.967807
135200	9.69	0.6755	0.0481		4.99483	6.74152	0.967807
135400	9.716	0.6765	0.0482		5.00824	6.7515	0.969819
135600	9.736	0.6775	0.0484		5.01855	6.76148	0.973843
135800	9.76	0.6785	0.0486		5.03092	6.77146	0.977867
136000	9.784	0.6795	0.0488		5.04329	6.78144	0.981891
136200	9.806	0.6805	0.0488		5.05463	6.79142	0.981891
136400	9.826	0.6815	0.0489		5.06494	6.8014	0.983903
136600	9.848	0.6825	0.049		5.07628	6.81138	0.985915
136800	9.878	0.6837	0.0491		5.09174	6.82335	0.987928
137000	9.898	0.6847	0.0492		5.10205	6.83333	0.98994
137200	9.92	0.6856	0.0494		5.11339	6.84232	0.993964
137400	9.94	0.6868	0.0495		5.1237	6.85429	0.995976
137600	9.96	0.6876	0.0496		5.13401	6.86228	0.997988
137800	9.984	0.6886	0.0498		5.14638	6.87226	1.00201
138000	10.008	0.6896	0.0499		5.15875	6.88224	1.00402
138200	10.028	0.6906	0.0499		5.16906	6.89222	1.00402
138400	10.052	0.6917	0.05		5.18143	6.90319	1.00604
138600	10.074	0.6926	0.0503		5.19277	6.91218	1.01207
138800	10.096	0.6936	0.0504		5.20411	6.92216	1.01408
139000	10.114	0.6945	0.0505		5.21339	6.93114	1.0161
139200	10.14	0.6955	0.0507		5.22679	6.94112	1.02012
139400	10.162	0.6967	0.0509		5.23813	6.95309	1.02414
139600	10.184	0.6977	0.0509		5.24947	6.96307	1.02414
139800	10.202	0.6986	0.0511		5.25875	6.97206	1.02817
140000	10.228	0.6997	0.0513		5.27215	6.98303	1.03219
140200	10.248	0.7005	0.0514		5.28246	6.99102	1.03421
140400	10.268	0.7016	0.0515		5.29277	7.002	1.03622
140600	10.29	0.7025	0.0517		5.30411	7.01098	1.04024
140800	10.31	0.7035	0.0518		5.31442	7.02096	1.04225
141000	10.33	0.7044	0.0519		5.32473	7.02994	1.04427
141200	10.35	0.7053	0.0521		5.33504	7.03892	1.04829
141400	10.376	0.7064	0.0522		5.34844	7.0499	1.0503
141600	10.4	0.7074	0.0523		5.36081	7.05988	1.05231
141800	10.424	0.7086	0.0525		5.37318	7.07186	1.05634
142000	10.444	0.7094	0.0526		5.38349	7.07984	1.05835
142200	10.468	0.7105	0.0528		5.39586	7.09082	1.06237
142400	10.486	0.7115	0.0528		5.40514	7.1008	1.06237
142600	10.51	0.7125	0.0531		5.41751	7.11078	1.06841
142800	10.53	0.7135	0.0533		5.42782	7.12076	1.07243
143000	10.554	0.7144	0.0534		5.44019	7.12974	1.07445
143200	10.578	0.7154	0.0535		5.45257	7.13972	1.07646
143400	10.594	0.7164	0.0537		5.46081	7.1497	1.08048
143600	10.618	0.7173	0.0539		5.47318	7.15868	1.08451
143800	10.642	0.7183	0.054		5.48556	7.16866	1.08652
144000	10.668	0.7193	0.0543		5.49896	7.17864	1.09256
144200	10.69	0.7204	0.0544		5.5103	7.18962	1.09457
144400	10.708	0.7214	0.0545		5.51958	7.1996	1.09658
144600	10.728	0.7224	0.0548		5.52989	7.20958	1.10262
144800	10.752	0.7234	0.0549		5.54226	7.21956	1.10463
145000	10.774	0.7245	0.0551		5.5536	7.23054	1.10865
145200	10.79	0.7254	0.0554		5.56184	7.23952	1.11469
145400	10.81	0.7263	0.0556		5.57215	7.2485	1.11871
145600	10.836	0.7275	0.0557		5.58556	7.26048	1.12072
145800	10.858	0.7285	0.056		5.5969	7.27046	1.12676
146000	10.878	0.7295	0.0562		5.6072	7.28044	1.13078
146200	10.892	0.7305	0.0566		5.61442	7.29042	1.13883
146400	10.912	0.7314	0.0571		5.62473	7.2994	1.14889
146600	10.932	0.7325	0.0573		5.63504	7.31038	1.15292
146800	10.954	0.7335	0.0576		5.64638	7.32036	1.15895
147000	10.972	0.7345	0.0579		5.65566	7.33034	1.16499
147200	10.988	0.7355	0.0582		5.66391	7.34032	1.17103
147400	11	0.7365	0.0585		5.67009	7.3503	1.17706
147600	11.022	0.7374	0.0587		5.68143	7.35928	1.18109
147800	11.044	0.7384	0.059		5.69277	7.36926	1.18712
148000	11.06	0.7395	0.0593		5.70102	7.38024	1.19316
148200	11.078	0.7404	0.0596		5.7103	7.38922	1.1992
148400	11.096	0.7414	0.0598		5.71958	7.3992	1.20322
148600	11.116	0.7424	0.0599		5.72988	7.40918	1.20523
148800	11.134	0.7434	0.0602		5.73916	7.41916	1.21127
149000	11.156	0.7444	0.0604		5.7505	7.42914	1.21529
149200	11.176	0.7453	0.0606		5.76081	7.43812	1.21932
149400	11.194	0.7465	0.0608		5.77009	7.4501	1.22334
149600	11.21	0.7474	0.0609		5.77834	7.45908	1.22535
149800	11.232	0.7484	0.0611		5.78968	7.46906	1.22938
150000	11.244	0.7494	0.0613		5.79586	7.47904	1.2334
150200	11.256	0.7503	0.0616		5.80205	7.48802	1.23944
150400	11.268	0.7513	0.0618		5.80823	7.498	1.24346
150600	11.288	0.7525	0.062		5.81854	7.50998	1.24748
150800	11.308	0.7535	0.0622		5.82885	7.51996	1.25151
151000	11.318	0.7544	0.0623		5.83401	7.52894	1.25352
151200	11.334	0.7553	0.0624		5.84226	7.53792	1.25553
151400	11.35	0.7564	0.0626		5.8505	7.5489	1.25956
151600	11.36	0.7573	0.063		5.85566	7.55788	1.26761
151800	11.338	0.7586	0.0686		5.84432	7.57086	1.38028
152000	11.342	0.7595	0.0696		5.84638	7.57984	1.4004
152200	11.354	0.7606	0.0703		5.85256	7.59082	1.41449
152400	11.368	0.7615	0.0707		5.85978	7.5998	1.42254
152600	11.386	0.7624	0.0711		5.86906	7.60878	1.43058
152800	11.398	0.7635	0.0716		5.87525	7.61976	1.44064
153000	11.412	0.7644	0.072		5.88246	7.62874	1.44869
153200	11.424	0.7654	0.0723		5.88865	7.63872	1.45473
153400	11.44	0.7663	0.0727		5.89689	7.6477	1.46278
153600	11.464	0.7673	0.0729		5.90927	7.65768	1.4668
153800	11.488	0.7684	0.0731		5.92164	7.66866	1.47082
154000	11.512	0.7692	0.0735		5.93401	7.67665	1.47887
154200	11.532	0.7703	0.0737		5.94432	7.68762	1.4829
154400	11.56	0.7713	0.074		5.95875	7.6976	1.48893
154600	11.584	0.7723	0.0742		5.97112	7.70758	1.49296
154800	11.6	0.7732	0.0745		5.97937	7.71657	1.49899
155000	11.622	0.7743	0.0746		5.99071	7.72754	1.50101
155200	11.644	0.7752	0.075		6.00205	7.73653	1.50905
155400	11.668	0.7763	0.0752		6.01442	7.7475	1.51308
155600	11.692	0.7773	0.0754		6.02679	7.75749	1.5171
155800	11.716	0.7783	0.0756		6.03916	7.76747	1.52113
156000	11.74	0.7794	0.0759		6.05153	7.77844	1.52716
156200	11.762	0.7803	0.0761		6.06287	7.78743	1.53119
156400	11.782	0.7812	0.0763		6.07318	7.79641	1.53521
156600	11.802	0.7822	0.0766		6.08349	7.80639	1.54125
156800	11.826	0.7831	0.0768		6.09586	7.81537	1.54527
157000	11.85	0.7842	0.0769		6.10823	7.82635	1.54728
157200	11.866	0.7851	0.0769		6.11648	7.83533	1.54728
157400	11.888	0.7862	0.0769		6.12782	7.84631	1.54728
157600	11.906	0.7873	0.0773		6.1371	7.85729	1.55533
157800	11.926	0.7884	0.0777		6.14741	7.86826	1.56338
158000	11.95	0.7893	0.078		6.15978	7.87725	1.56942
158200	11.964	0.7903	0.0784		6.167	7.88723	1.57746
158400	11.986	0.7914	0.0786		6.17834	7.8982	1.58149
158600	12.008	0.7925	0.0789		6.18968	7.90918	1.58753
158800	12.026	0.7933	0.0791		6.19896	7.91717	1.59155
159000	12.042	0.7944	0.0794		6.2072	7.92814	1.59759
159200	12.064	0.7953	0.0797		6.21854	7.93713	1.60362
159400	12.088	0.7963	0.0799		6.23091	7.94711	1.60765
159600	12.106	0.7973	0.0802		6.24019	7.95709	1.61368
159800	12.12	0.7981	0.0808		6.24741	7.96507	1.62575
160000	12.14	0.7992	0.0814		6.25772	7.97605	1.63783
160200	12.162	0.8002	0.0816		6.26906	7.98603	1.64185
160400	12.18	0.8013	0.0821		6.27834	7.99701	1.65191
160600	12.19	0.8022	0.0837		6.28349	8.00599	1.6841
160800	12.212	0.8032	0.0843		6.29483	8.01597	1.69618
161000	12.23	0.8042	0.085		6.30411	8.02595	1.71026
161200	12.25	0.8054	0.0856		6.31442	8.03792	1.72233
161400	12.264	0.8062	0.0862		6.32164	8.04591	1.73441
161600	12.278	0.8073	0.0868		6.32885	8.05689	1.74648
161800	12.276	0.8083	0.0887		6.32782	8.06687	1.78471
162000	12.276	0.8093	0.0909		6.32782	8.07685	1.82897
162200	12.26	0.8105	0.0931		6.31957	8.08882	1.87324
162400	12.258	0.8114	0.0978		6.31854	8.0978	1.96781
162600	12.26	0.8123	0.102		6.31957	8.10679	2.05231
162800	12.262	0.8132	0.1058		6.32061	8.11577	2.12877
163000	12.274	0.8144	0.1087		6.32679	8.12774	2.18712
163200	12.286	0.8153	0.1107		6.33298	8.13673	2.22736
163400	12.304	0.8162	0.1124		6.34225	8.14571	2.26157
163600	12.322	0.8172	0.1139		6.35153	8.15569	2.29175
163800	12.344	0.8182	0.1152		6.36287	8.16567	2.31791
164000	12.362	0.8192	0.1164		6.37215	8.17565	2.34205
164200	12.384	0.8202	0.1175		6.38349	8.18563	2.36419
164400	12.402	0.8211	0.1185		6.39277	8.19461	2.38431
164600	12.422	0.8221	0.1193		6.40308	8.20459	2.4004
164800	12.448	0.8232	0.1202		6.41648	8.21557	2.41851
165000	12.472	0.8241	0.1211		6.42885	8.22455	2.43662
165200	12.49	0.8251	0.1221		6.43813	8.23453	2.45674
165400	12.516	0.8261	0.123		6.45153	8.24451	2.47485
165600	12.538	0.8274	0.1241		6.46287	8.25749	2.49698
165800	12.554	0.8284	0.1256		6.47112	8.26747	2.52716
166000	12.566	0.8293	0.1275		6.47731	8.27645	2.56539
166200	12.578	0.8304	0.1294		6.48349	8.28743	2.60362
166400	12.598	0.8314	0.1307		6.4938	8.29741	2.62978
166600	12.612	0.8323	0.1316		6.50102	8.30639	2.64789
166800	12.634	0.8332	0.1326		6.51236	8.31537	2.66801
167000	12.652	0.8342	0.1334		6.52164	8.32535	2.6841
167200	12.68	0.8354	0.1342		6.53607	8.33733	2.7002
167400	12.7	0.8362	0.1351		6.54638	8.34531	2.71831
167600	12.724	0.8373	0.1358		6.55875	8.35629	2.73239
167800	12.744	0.8383	0.1367		6.56906	8.36627	2.7505
168000	12.764	0.8392	0.1375		6.57937	8.37525	2.7666
168200	12.786	0.8402	0.1383		6.59071	8.38523	2.7827
168400	12.808	0.8413	0.139		6.60205	8.39621	2.79678
168600	12.83	0.8424	0.1397		6.61339	8.40719	2.81087
168800	12.852	0.8432	0.1405		6.62473	8.41517	2.82696
169000	12.874	0.8442	0.1412		6.63607	8.42515	2.84105
169200	12.896	0.8452	0.1419		6.64741	8.43513	2.85513
169400	12.916	0.8462	0.1426		6.65772	8.44511	2.86922
169600	12.938	0.8473	0.1432		6.66906	8.45609	2.88129
169800	12.964	0.8482	0.1439		6.68246	8.46507	2.89537
170000	12.984	0.8493	0.1447		6.69277	8.47605	2.91147
170200	13.004	0.8502	0.1454		6.70308	8.48503	2.92555
170400	13.018	0.8512	0.1462		6.71029	8.49501	2.94165
170600	13.032	0.8523	0.1471		6.71751	8.50599	2.95976
170800	13.038	0.8534	0.1481		6.7206	8.51697	2.97988
171000	13.05	0.8543	0.149		6.72679	8.52595	2.99799
171200	13.064	0.8553	0.1498		6.73401	8.53593	3.01408
171400	13.082	0.8563	0.1507		6.74328	8.54591	3.03219
171600	13.096	0.8572	0.1515		6.7505	8.55489	3.04829
171800	13.118	0.8583	0.1523		6.76184	8.56587	3.06439
172000	13.14	0.8589	0.1531		6.77318	8.57186	3.08048
172200	13.166	0.8601	0.1539		6.78658	8.58383	3.09658
172400	13.188	0.8613	0.1547		6.79792	8.59581	3.11268
172600	13.21	0.8622	0.1556		6.80926	8.60479	3.13078
172800	13.226	0.8632	0.1564		6.81751	8.61477	3.14688
173000	13.246	0.8642	0.1573		6.82782	8.62475	3.16499
173200	13.266	0.8652	0.1581		6.83813	8.63473	3.18109
173400	13.286	0.8663	0.1588		6.84844	8.64571	3.19517
173600	13.308	0.8672	0.1597		6.85978	8.65469	3.21328
173800	13.326	0.8681	0.1605		6.86906	8.66367	3.22938
174000	13.348	0.8693	0.1613		6.8804	8.67565	3.24547
174200	13.366	0.8703	0.1622		6.88968	8.68563	3.26358
174400	13.384	0.8712	0.163		6.89895	8.69461	3.27968
174600	13.406	0.8724	0.1639		6.91029	8.70659	3.29779
174800	13.424	0.8733	0.1648		6.91957	8.71557	3.3159
175000	13.438	0.8742	0.1657		6.92679	8.72455	3.334
175200	13.454	0.8752	0.1665		6.93504	8.73453	3.3501
175400	13.466	0.8762	0.1675		6.94122	8.74451	3.37022
175600	13.484	0.8772	0.1685		6.9505	8.75449	3.39034
175800	13.504	0.8784	0.1695		6.96081	8.76647	3.41046
176000	13.518	0.8793	0.1705		6.96803	8.77545	3.43058
176200	13.532	0.8802	0.1714		6.97524	8.78443	3.44869
176400	13.552	0.8812	0.1724		6.98555	8.79441	3.46881
176600	13.57	0.8823	0.1732		6.99483	8.80539	3.48491
176800	13.582	0.8831	0.1742		7.00102	8.81337	3.50503
177000	13.602	0.8841	0.1751		7.01133	8.82335	3.52314
177200	13.618	0.885	0.176		7.01957	8.83234	3.54125
177400	13.624	0.8862	0.1806		7.02267	8.84431	3.6338
177600	13.63	0.8872	0.1842		7.02576	8.85429	3.70624
177800	13.524	0.8883	0.1926		6.97112	8.86527	3.87525
178000	13.446	0.8891	0.2157		6.93091	8.87325	4.34004
178200	13.362	0.8908	0.2242		6.88761	8.89022	4.51107
178400	13.286	0.8919	0.2285		6.84844	8.9012	4.59759
178600	13.172	0.8924	0.2357		6.78968	8.90619	4.74245
178800	13.134	0.8928	0.2414		6.77009	8.91018	4.85714
179000	13.148	0.8942	0.2444		6.77731	8.92415	4.91751
179200	13.16	0.8954	0.2469		6.78349	8.93613	4.96781
179400	13.168	0.8963	0.2487		6.78761	8.94511	5.00402
179600	13.184	0.8974	0.2503		6.79586	8.95609	5.03622
179800	13.2	0.8983	0.2519		6.80411	8.96507	5.06841
180000	13.214	0.8992	0.2533		6.81133	8.97405	5.09658
180200	13.234	0.9003	0.2546		6.82163	8.98503	5.12274
180400	13.252	0.9013	0.2558		6.83091	8.99501	5.14688
180600	13.266	0.9022	0.2569		6.83813	9.00399	5.16901
180800	13.284	0.9033	0.2582		6.84741	9.01497	5.19517
181000	13.296	0.9042	0.2595		6.85359	9.02395	5.22133
181200	13.306	0.9053	0.2609		6.85875	9.03493	5.2495
181400	13.292	0.9065	0.2625		6.85153	9.04691	5.28169
181600	13.074	0.9093	0.2691		6.73916	9.07485	5.41449
181800	12.446	0.9112	0.2783		6.41545	9.09381	5.5996
182000	12.306	0.9066	0.2833		6.34329	9.0479	5.7002
182200	12.39	0.9071	0.2866		6.38658	9.05289	5.7666
182400	12.448	0.9087	0.2894		6.41648	9.06886	5.82294
182600	12.45	0.9098	0.2926		6.41751	9.07984	5.88732
182800	12.456	0.9116	0.296		6.4206	9.0978	5.95573
183000	12.562	0.9154	0.298		6.47524	9.13573	5.99598
183200	12.58	0.9146	0.2993		6.48452	9.12774	6.02213
183400	12.618	0.9159	0.3009		6.50411	9.14072	6.05433
183600	12.622	0.917	0.3026		6.50617	9.1517	6.08853
183800	12.678	0.9187	0.304		6.53504	9.16866	6.1167
184000	12.688	0.9193	0.3056		6.54019	9.17465	6.14889
184200	12.7	0.9205	0.3072		6.54638	9.18663	6.18109
184400	12.648	0.9214	0.311		6.51957	9.19561	6.25755
184600	12.602	0.9222	0.3172		6.49586	9.20359	6.38229
184800	12.554	0.9236	0.3263		6.47112	9.21756	6.56539
185000	12.434	0.925	0.3445		6.40926	9.23154	6.93159
185200	12.224	0.926	0.3795		6.30102	9.24152	7.63581
185400	12.002	0.9263	0.4134		6.18658	9.24451	8.31791
185600	11.992	0.9272	0.4208		6.18143	9.25349	8.4668
185800	12.008	0.9283	0.4242		6.18968	9.26447	8.53521
186000	12.02	0.9292	0.4268		6.19586	9.27345	8.58753
186200	12.034	0.9303	0.4291		6.20308	9.28443	8.6338
186400	12.056	0.9312	0.4312		6.21442	9.29341	8.67606
186600	12.068	0.9322	0.433		6.22061	9.30339	8.71227
186800	12.092	0.9332	0.4346		6.23298	9.31337	8.74447
187000	12.08	0.9347	0.4367		6.22679	9.32834	8.78672
187200	12.002	0.9355	0.4427		6.18658	9.33633	8.90744
187400	11.958	0.9358	0.4459		6.1639	9.33932	8.97183
187600	11.862	0.9379	0.4481		6.11442	9.36028	9.0161
187800	11.91	0.9391	0.4489		6.13916	9.37226	9.03219
188000	11.85	0.9387	0.4496		6.10823	9.36826	9.04628
188200	11.758	0.9403	0.4419		6.06081	9.38423	8.89135
188400	11.836	0.9418	0.4416		6.10102	9.3992	8.88531
188600	11.79	0.9417	0.4426		6.07731	9.3982	8.90543
188800	11.836	0.9438	0.4436		6.10102	9.41916	8.92555
189000	11.818	0.9438	0.4442		6.09174	9.41916	8.93763
189200	11.872	0.9456	0.4451		6.11957	9.43713	8.95573
189400	11.868	0.946	0.4458		6.11751	9.44112	8.96982
189600	11.916	0.9476	0.4466		6.14225	9.45709	8.98592
189800	11.936	0.9486	0.4489		6.15256	9.46707	9.03219
190000	11.944	0.9496	0.4507		6.15669	9.47705	9.06841
190200	11.956	0.9503	0.4522		6.16287	9.48403	9.09859
190400	11.97	0.9514	0.4539		6.17009	9.49501	9.1328
190600	11.99	0.9523	0.4554		6.1804	9.50399	9.16298
190800	12.008	0.9531	0.4566		6.18968	9.51198	9.18712
191000	12.026	0.9542	0.4577		6.19896	9.52295	9.20926
191200	12.046	0.9552	0.4587		6.20927	9.53293	9.22938
191400	12.068	0.9563	0.4598		6.22061	9.54391	9.25151
191600	12.084	0.9572	0.461		6.22885	9.55289	9.27565
191800	12.102	0.9583	0.4621		6.23813	9.56387	9.29779
192000	12.116	0.9593	0.4633		6.24535	9.57385	9.32193
192200	12.136	0.9603	0.4645		6.25566	9.58383	9.34608
192400	12.138	0.9611	0.4746		6.25669	9.59182	9.5493
192600	12.156	0.9624	0.4771		6.26597	9.60479	9.5996
192800	12.166	0.9633	0.4791		6.27112	9.61377	9.63984
193000	12.184	0.9644	0.4807		6.2804	9.62475	9.67203
193200	12.196	0.9654	0.4819		6.28658	9.63473	9.69618
193400	12.216	0.9661	0.4759		6.29689	9.64172	9.57545
193600	12.234	0.9672	0.4642		6.30617	9.65269	9.34004
193800	12.254	0.9684	0.4643		6.31648	9.66467	9.34205
194000	12.268	0.9693	0.4644		6.3237	9.67365	9.34406
194200	12.282	0.9704	0.4646		6.33091	9.68463	9.34809
194400	12.302	0.9714	0.465		6.34122	9.69461	9.35614
194600	12.318	0.9724	0.4656		6.34947	9.70459	9.36821
194800	12.336	0.9733	0.4662		6.35875	9.71357	9.38028
195000	12.35	0.9741	0.4669		6.36597	9.72156	9.39437
195200	12.366	0.9753	0.4677		6.37421	9.73353	9.41046
195400	12.384	0.9761	0.4687		6.38349	9.74152	9.43058
195600	12.4	0.9773	0.4697		6.39174	9.75349	9.4507
195800	12.412	0.9783	0.4708		6.39792	9.76347	9.47284
196000	12.402	0.9795	0.4726		6.39277	9.77545	9.50905
196200	12.412	0.9804	0.4739		6.39792	9.78443	9.53521
196400	12.418	0.9813	0.475		6.40102	9.79341	9.55734
196600	12.426	0.9822	0.4763		6.40514	9.8024	9.5835
196800	12.446	0.9833	0.4775		6.41545	9.81337	9.60765
197000	12.46	0.9844	0.4789		6.42267	9.82435	9.63581
197200	12.474	0.9853	0.4801		6.42988	9.83333	9.65996
197400	12.492	0.9863	0.4813		6.43916	9.84331	9.6841
197600	12.51	0.9872	0.4824		6.44844	9.8523	9.70624
197800	12.53	0.9882	0.4834		6.45875	9.86228	9.72636
198000	12.546	0.9892	0.4845		6.467	9.87226	9.74849
198200	12.564	0.9903	0.4855		6.47627	9.88323	9.76861
198400	12.58	0.9914	0.4866		6.48452	9.89421	9.79074
198600	12.578	0.9924	0.4887		6.48349	9.90419	9.833
198800	12.588	0.9935	0.4906		6.48865	9.91517	9.87123
199000	12.594	0.9943	0.4917		6.49174	9.92315	9.89336
199200	12.612	0.9952	0.4926		6.50102	9.93214	9.91147
199400	12.626	0.9962	0.4937		6.50823	9.94212	9.9336
199600	12.644	0.9971	0.4947		6.51751	9.9511	9.95372
199800	12.66	0.9981	0.4958		6.52576	9.96108	9.97586
200000	12.676	0.9991	0.4967		6.53401	9.97106	9.99396
200200	12.694	1.0001	0.4978		6.54328	9.98104	10.0161
200400	12.718	1.0012	0.4987		6.55566	9.99202	10.0342
200600	12.736	1.0023	0.4998		6.56493	10.003	10.0563
200800	12.756	1.0032	0.5008		6.57524	10.012	10.0765
201000	12.774	1.0043	0.5018		6.58452	10.023	10.0966
201200	12.79	1.0053	0.5028		6.59277	10.0329	10.1167
201400	12.804	1.0062	0.5044		6.59999	10.0419	10.1489
201600	12.82	1.0072	0.5056		6.60823	10.0519	10.173
201800	12.836	1.0083	0.5068		6.61648	10.0629	10.1972
202000	12.844	1.0092	0.5081		6.6206	10.0719	10.2233
202200	12.806	1.0104	0.5103		6.60102	10.0838	10.2676
202400	12.682	1.0118	0.518		6.5371	10.0978	10.4225
202600	12.66	1.0124	0.5202		6.52576	10.1038	10.4668
202800	12.656	1.0131	0.522		6.5237	10.1108	10.503
203000	12.662	1.014	0.5238		6.52679	10.1198	10.5392
203200	12.67	1.015	0.5262		6.53091	10.1297	10.5875
203400	12.67	1.0161	0.5286		6.53091	10.1407	10.6358
203600	11.948	1.0092	0.5107		6.15875	10.0719	10.2757
203800	12.218	1.0092	0.5107		6.29792	10.0719	10.2757
204000	11.868	1.0092	0.5107		6.11751	10.0719	10.2757
204200	11.806	1.0172	0.5201		6.08555	10.1517	10.4648
204400	11.886	1.0182	0.521		6.12679	10.1617	10.4829
204600	11.932	1.0201	0.5217		6.1505	10.1806	10.497
204800	11.924	1.0222	0.5226		6.14638	10.2016	10.5151
205000	12.062	1.0253	0.5232		6.21751	10.2325	10.5272
205200	12.048	1.0254	0.5238		6.2103	10.2335	10.5392
205400	12.092	1.0263	0.5243		6.23298	10.2425	10.5493
205600	12.074	1.0269	0.525		6.2237	10.2485	10.5634
205800	12.09	1.0284	0.526		6.23195	10.2635	10.5835
206000	12.136	1.0296	0.5267		6.25566	10.2754	10.5976
206200	12.132	1.0301	0.5275		6.25359	10.2804	10.6137
206400	12.152	1.0313	0.5284		6.2639	10.2924	10.6318
206600	12.168	1.0323	0.5292		6.27215	10.3024	10.6479
206800	12.184	1.0333	0.53		6.2804	10.3124	10.664
207000	12.202	1.0344	0.5306		6.28968	10.3234	10.6761
207200	12.218	1.0352	0.5314		6.29792	10.3313	10.6922
207400	12.236	1.0363	0.5322		6.3072	10.3423	10.7082
207600	12.25	1.0373	0.5331		6.31442	10.3523	10.7264
207800	12.262	1.0382	0.5339		6.32061	10.3613	10.7425
208000	12.27	1.0391	0.5358		6.32473	10.3703	10.7807
208200	12.286	1.0402	0.5377		6.33298	10.3812	10.8189
208400	12.3	1.0413	0.5393		6.34019	10.3922	10.8511
208600	12.312	1.0422	0.5404		6.34638	10.4012	10.8732
208800	12.326	1.0432	0.5416		6.35359	10.4112	10.8974
209000	12.346	1.0442	0.5425		6.3639	10.4212	10.9155
209200	12.362	1.0453	0.5437		6.37215	10.4321	10.9396
209400	12.37	1.0462	0.5446		6.37628	10.4411	10.9577
209600	12.386	1.0472	0.5457		6.38452	10.4511	10.9799
209800	12.396	1.0483	0.5467		6.38968	10.4621	11
210000	12.41	1.0493	0.5477		6.39689	10.4721	11.0201
210200	12.422	1.0503	0.5493		6.40308	10.482	11.0523
210400	12.426	1.0512	0.5511		6.40514	10.491	11.0885
210600	12.438	1.0521	0.5532		6.41133	10.5	11.1308
210800	12.446	1.0532	0.5551		6.41545	10.511	11.169
211000	12.456	1.0542	0.5568		6.4206	10.521	11.2032
211200	12.468	1.0553	0.5583		6.42679	10.5319	11.2334
211400	12.476	1.0561	0.5599		6.43091	10.5399	11.2656
211600	12.48	1.0574	0.5619		6.43298	10.5529	11.3058
211800	12.486	1.0583	0.564		6.43607	10.5619	11.3481
212000	12.492	1.0593	0.5658		6.43916	10.5719	11.3843
212200	12.5	1.0603	0.5673		6.44329	10.5818	11.4145
212400	12.51	1.0612	0.5689		6.44844	10.5908	11.4467
212600	12.52	1.0622	0.5703		6.45359	10.6008	11.4748
212800	12.53	1.0633	0.5719		6.45875	10.6118	11.507
213000	12.53	1.0642	0.5734		6.45875	10.6208	11.5372
213200	12.536	1.0653	0.575		6.46184	10.6317	11.5694
213400	12.402	1.066	0.5805		6.39277	10.6387	11.6801
213600	12.456	1.0678	0.5834		6.4206	10.6567	11.7384
213800	12.398	1.0678	0.5863		6.39071	10.6567	11.7968
214000	12.414	1.0695	0.5895		6.39896	10.6737	11.8612
214200	12.398	1.0702	0.5922		6.39071	10.6806	11.9155
214400	12.4	1.0711	0.5944		6.39174	10.6896	11.9598
214600	12.4	1.0722	0.5962		6.39174	10.7006	11.996
214800	12.388	1.0734	0.5994		6.38555	10.7126	12.0604
214992	11.364	1.0828	0.6537		5.85772	10.8064	13.1529
215192	10.94	1.0828	0.6537		5.63916	10.8064	13.1529
215392	11.338	1.0766	0.6526		5.84432	10.7445	13.1308
215592	11.294	1.0812	0.653		5.82164	10.7904	13.1388
215793	11.156	1.0795	0.6532		5.7505	10.7735	13.1429
215994	11.144	1.0793	0.6542		5.74432	10.7715	13.163
216194	11.224	1.0809	0.6552		5.78555	10.7874	13.1831
216394	11.338	1.082	0.6554		5.84432	10.7984	13.1871
216594	11.348	1.0824	0.6556		5.84947	10.8024	13.1911
216795	11.352	1.0829	0.6559		5.85153	10.8074	13.1972
216996	10.828	1.0826	0.8016		5.58143	10.8044	16.1288
217196	10.866	1.0829	0.8128		5.60102	10.8074	16.3541
217396	10.924	1.085	0.817		5.63092	10.8283	16.4386
217596	11.044	1.0872	0.8191		5.69277	10.8503	16.4809
217797	11.06	1.0882	0.8213		5.70102	10.8603	16.5252
217998	11.08	1.0892	0.8234		5.71133	10.8703	16.5674
218198	11.104	1.0903	0.8255		5.7237	10.8812	16.6097
218398	11.12	1.0911	0.8277		5.73195	10.8892	16.6539
218598	11.16	1.0925	0.8299		5.75257	10.9032	16.6982
218798	11.144	1.0929	0.8322		5.74432	10.9072	16.7445
218998	11.19	1.0945	0.8345		5.76803	10.9232	16.7907
219198	11.204	1.0952	0.8365		5.77525	10.9301	16.831
219398	11.226	1.0963	0.839		5.78659	10.9411	16.8813
219598	11.244	1.0972	0.841		5.79586	10.9501	16.9215
219798	11.268	1.0984	0.8433		5.80823	10.9621	16.9678
219998	11.28	1.0992	0.8455		5.81442	10.9701	17.0121
220198	11.296	1.1001	0.8484		5.82267	10.979	17.0704
220398	11.32	1.1014	0.8508		5.83504	10.992	17.1187
220598	11.33	1.1021	0.8534		5.84019	10.999	17.171
220798	11.35	1.1031	0.8555		5.8505	11.009	17.2133
220998	11.366	1.1043	0.8577		5.85875	11.021	17.2575
221198	11.38	1.1052	0.86		5.86597	11.0299	17.3038
221398	11.398	1.1064	0.8623		5.87525	11.0419	17.3501
221598	11.41	1.1072	0.8644		5.88143	11.0499	17.3924
221798	11.422	1.108	0.866		5.88762	11.0579	17.4245
221998	11.436	1.1091	0.8677		5.89483	11.0689	17.4588
222198	11.452	1.1103	0.8693		5.90308	11.0808	17.4909
222398	11.458	1.1113	0.8713		5.90617	11.0908	17.5312
222598	11.446	1.1123	0.8736		5.89999	11.1008	17.5775
222798	11.402	1.1133	0.8758		5.87731	11.1108	17.6217
222998	11.392	1.114	0.88		5.87215	11.1178	17.7062
223198	11.39	1.1151	0.8843		5.87112	11.1287	17.7928
223398	11.398	1.1161	0.8858		5.87525	11.1387	17.8229
223598	11.4	1.1171	0.8872		5.87628	11.1487	17.8511
223798	11.406	1.1182	0.8889		5.87937	11.1597	17.8853
223998	11.412	1.1194	0.8907		5.88246	11.1717	17.9215
224198	11.412	1.1201	0.8923		5.88246	11.1786	17.9537
224398	11.42	1.1212	0.894		5.88659	11.1896	17.9879
224598	11.428	1.1221	0.8956		5.89071	11.1986	18.0201
224798	11.434	1.1231	0.8975		5.8938	11.2086	18.0584
224998	11.444	1.1242	0.8989		5.89896	11.2196	18.0865
225198	11.454	1.125	0.9006		5.90411	11.2275	18.1207
225398	11.462	1.1261	0.9022		5.90823	11.2385	18.1529
225598	11.47	1.1271	0.9037		5.91236	11.2485	18.1831
225798	11.486	1.1281	0.9053		5.92061	11.2585	18.2153
225998	11.492	1.1292	0.9069		5.9237	11.2695	18.2475
226198	11.504	1.1301	0.9083		5.92988	11.2784	18.2757
226398	11.518	1.1311	0.9097		5.9371	11.2884	18.3038
226598	11.532	1.1323	0.9115		5.94432	11.3004	18.34
226798	11.538	1.1332	0.9133		5.94741	11.3094	18.3763
226998	11.544	1.1343	0.9155		5.9505	11.3204	18.4205
227198	11.546	1.1352	0.9171		5.95153	11.3293	18.4527
227398	11.552	1.136	0.9188		5.95463	11.3373	18.4869
227598	11.562	1.1371	0.9207		5.95978	11.3483	18.5252
227798	11.574	1.1382	0.9225		5.96597	11.3593	18.5614
227998	11.582	1.1392	0.9243		5.97009	11.3693	18.5976
228198	11.586	1.1402	0.9261		5.97215	11.3792	18.6338
228398	11.594	1.1412	0.9281		5.97628	11.3892	18.674
228598	11.586	1.142	0.9359		5.97215	11.3972	18.831
228798	11.57	1.1433	0.9391		5.9639	11.4102	18.8954
228998	11.556	1.1442	0.9416		5.95669	11.4192	18.9457
229198	11.544	1.1451	0.9441		5.9505	11.4281	18.996
229398	11.536	1.146	0.9464		5.94638	11.4371	19.0423
229598	11.382	1.1473	0.9545		5.867	11.4501	19.2052
229798	11.33	1.1478	0.9561		5.84019	11.4551	19.2374
229998	11.162	1.1493	0.9602		5.7536	11.4701	19.3199
230198	11.078	1.1506	0.9629		5.7103	11.483	19.3742
230398	11	1.1508	0.9645		5.67009	11.485	19.4064
230598	11.03	1.1526	0.9655		5.68555	11.503	19.4266
230798	11.014	1.1529	0.9663		5.67731	11.506	19.4427
230998	11.024	1.1541	0.9675		5.68246	11.518	19.4668
231198	11.028	1.1549	0.9684		5.68452	11.5259	19.4849
231398	11.044	1.1562	0.9698		5.69277	11.5389	19.5131
231598	10.98	1.1572	0.983		5.65978	11.5489	19.7787
231798	10.988	1.158	0.9843		5.66391	11.5569	19.8048
231998	11.004	1.1592	0.9858		5.67215	11.5689	19.835
232198	11.006	1.1598	0.9871		5.67318	11.5749	19.8612
232398	11.032	1.1614	0.9884		5.68659	11.5908	19.8873
232598	11.028	1.1619	0.9897		5.68452	11.5958	19.9135
232798	11.04	1.163	0.9902		5.69071	11.6068	19.9235
232998	11.046	1.1641	0.9904		5.6938	11.6178	19.9276
233198	11.056	1.165	0.9907		5.69896	11.6267	19.9336
233398	11.07	1.1661	0.9909		5.70617	11.6377	19.9376
233598	11.078	1.1671	0.9913		5.7103	11.6477	19.9457
233798	11.084	1.1681	0.992		5.71339	11.6577	19.9598
233998	11.026	1.1692	0.9941		5.68349	11.6687	20.002
234198	11.004	1.17	0.9966		5.67215	11.6766	20.0523
234398	10.992	1.1712	1.0002		5.66597	11.6886	20.1247
234598	10.986	1.1723	1.0034		5.66287	11.6996	20.1891
234798	10.986	1.1731	1.0049		5.66287	11.7076	20.2193
234998	10.984	1.1741	1.0089		5.66184	11.7176	20.2998
235198	10.99	1.175	1.0107		5.66494	11.7265	20.336
235398	11	1.176	1.0123		5.67009	11.7365	20.3682
235598	11.018	1.1772	1.0136		5.67937	11.7485	20.3944
235798	11.024	1.1781	1.0148		5.68246	11.7575	20.4185
235998	11.034	1.1792	1.0164		5.68762	11.7685	20.4507
236198	11.042	1.1801	1.0174		5.69174	11.7774	20.4708
236398	11.054	1.1812	1.0183		5.69793	11.7884	20.4889
236598	11.062	1.1821	1.0194		5.70205	11.7974	20.5111
236798	11.072	1.183	1.0205		5.7072	11.8064	20.5332
236998	11.066	1.1841	1.022		5.70411	11.8174	20.5634
237198	11.076	1.185	1.0233		5.70927	11.8263	20.5895
237398	11.09	1.186	1.0242		5.71648	11.8363	20.6076
237598	11.098	1.1869	1.0253		5.72061	11.8453	20.6298
237798	11.11	1.1879	1.0263		5.72679	11.8553	20.6499
237998	11.12	1.1891	1.027		5.73195	11.8673	20.664
238198	11.132	1.19	1.0277		5.73813	11.8762	20.6781
238398	11.142	1.191	1.0284		5.74329	11.8862	20.6922
238598	11.156	1.1921	1.0292		5.7505	11.8972	20.7082
238798	11.164	1.1929	1.0301		5.75463	11.9052	20.7264
238998	11.176	1.194	1.0309		5.76081	11.9162	20.7425
239198	11.186	1.195	1.0316		5.76597	11.9261	20.7565
239398	11.172	1.1961	1.0325		5.75875	11.9371	20.7746
239598	11.164	1.1971	1.0346		5.75463	11.9471	20.8169
239798	11.162	1.1981	1.0358		5.7536	11.9571	20.841
239998	11.162	1.199	1.0367		5.7536	11.9661	20.8592
240198	11.174	1.2001	1.0376		5.75978	11.977	20.8773
240398	11.184	1.201	1.0385		5.76494	11.986	20.8954
240598	11.19	1.2021	1.0389		5.76803	11.997	20.9034
240798	11.196	1.203	1.0393		5.77112	12.006	20.9115
240998	11.202	1.2039	1.0399		5.77421	12.015	20.9235
241198	11.216	1.2049	1.0407		5.78143	12.025	20.9396
241398	11.23	1.206	1.0416		5.78865	12.0359	20.9577
241598	11.24	1.2071	1.0425		5.7938	12.0469	20.9759
241798	11.25	1.2079	1.0434		5.79896	12.0549	20.994
241998	11.26	1.209	1.0443		5.80411	12.0659	21.0121
242198	11.272	1.21	1.0452		5.8103	12.0758	21.0302
242398	11.278	1.211	1.0461		5.81339	12.0858	21.0483
242598	11.288	1.212	1.0471		5.81854	12.0958	21.0684
242798	11.288	1.213	1.0478		5.81854	12.1058	21.0825
242998	11.3	1.214	1.0486		5.82473	12.1158	21.0986
243198	11.31	1.215	1.0493		5.82988	12.1257	21.1127
243398	11.252	1.2163	1.0517		5.79999	12.1387	21.161
243598	11.236	1.2172	1.0525		5.79174	12.1477	21.1771
243798	11.226	1.218	1.0532		5.78659	12.1557	21.1911
243998	11.23	1.2189	1.0538		5.78865	12.1647	21.2032
244198	11.24	1.22	1.0544		5.7938	12.1756	21.2153
244398	11.246	1.2209	1.0551		5.79689	12.1846	21.2294
244598	11.258	1.2219	1.0559		5.80308	12.1946	21.2455
244798	11.266	1.2231	1.0569		5.8072	12.2066	21.2656
244998	11.278	1.224	1.0577		5.81339	12.2156	21.2817
245198	11.286	1.225	1.0585		5.81751	12.2255	21.2978
245398	11.288	1.2261	1.0595		5.81854	12.2365	21.3179
245598	11.29	1.227	1.0612		5.81958	12.2455	21.3521
245798	11.298	1.2279	1.0622		5.8237	12.2545	21.3722
245998	11.308	1.2288	1.0634		5.82885	12.2635	21.3964
246198	11.32	1.2299	1.0644		5.83504	12.2745	21.4165
246398	11.334	1.231	1.0653		5.84226	12.2854	21.4346
246598	11.346	1.232	1.0664		5.84844	12.2954	21.4567
246798	11.354	1.2328	1.0673		5.85256	12.3034	21.4748
246998	11.366	1.2339	1.0683		5.85875	12.3144	21.495
247198	11.374	1.2348	1.0691		5.86287	12.3234	21.5111
247398	11.39	1.2359	1.0701		5.87112	12.3343	21.5312
247598	11.398	1.2369	1.071		5.87525	12.3443	21.5493
247798	11.41	1.2379	1.0718		5.88143	12.3543	21.5654
247998	11.422	1.239	1.0727		5.88762	12.3653	21.5835
248198	11.432	1.24	1.0735		5.89277	12.3752	21.5996
248398	11.44	1.2408	1.0743		5.89689	12.3832	21.6157
248598	11.45	1.242	1.0754		5.90205	12.3952	21.6378
248798	11.458	1.2429	1.0762		5.90617	12.4042	21.6539
248998	11.466	1.2437	1.0772		5.9103	12.4122	21.674
249198	11.48	1.2449	1.0781		5.91751	12.4242	21.6922
249398	11.49	1.2459	1.0789		5.92267	12.4341	21.7082
249598	11.502	1.2469	1.0797		5.92885	12.4441	21.7243
249798	11.514	1.248	1.0804		5.93504	12.4551	21.7384
249998	11.52	1.249	1.0816		5.93813	12.4651	21.7626
250198	11.528	1.2499	1.0828		5.94226	12.4741	21.7867
250398	11.532	1.2509	1.084		5.94432	12.484	21.8109
250598	11.544	1.2519	1.085		5.9505	12.494	21.831
250798	11.55	1.2528	1.0859		5.9536	12.503	21.8491
250998	11.564	1.254	1.0869		5.96081	12.515	21.8692
251198	11.572	1.255	1.0879		5.96494	12.525	21.8893
251398	11.58	1.2559	1.0889		5.96906	12.5339	21.9095
251598	11.578	1.257	1.0906		5.96803	12.5449	21.9437
251798	11.58	1.258	1.0921		5.96906	12.5549	21.9738
251998	11.584	1.2589	1.0931		5.97112	12.5639	21.994
252198	11.594	1.26	1.0939		5.97628	12.5749	22.0101
252398	11.596	1.261	1.0952		5.97731	12.5848	22.0362
252598	11.598	1.262	1.0965		5.97834	12.5948	22.0624
252798	11.604	1.2631	1.0977		5.98143	12.6058	22.0865
252998	11.604	1.264	1.0987		5.98143	12.6148	22.1066
253198	11.614	1.265	1.0994		5.98659	12.6248	22.1207
253398	11.622	1.2659	1.1002		5.99071	12.6337	22.1368
253598	11.634	1.2668	1.101		5.99689	12.6427	22.1529
253798	11.642	1.268	1.1019		6.00102	12.6547	22.171
253998	11.648	1.269	1.1027		6.00411	12.6647	22.1871
254198	11.662	1.2699	1.1036		6.01133	12.6737	22.2052
254398	11.654	1.271	1.1047		6.0072	12.6846	22.2274
254598	11.658	1.272	1.1051		6.00927	12.6946	22.2354
254798	11.66	1.2729	1.1056		6.0103	12.7036	22.2455
254998	11.668	1.2738	1.1062		6.01442	12.7126	22.2575
255198	11.676	1.2748	1.1068		6.01854	12.7226	22.2696
255398	11.686	1.2759	1.1075		6.0237	12.7335	22.2837
255598	11.704	1.277	1.1084		6.03298	12.7445	22.3018
255798	11.704	1.278	1.1091		6.03298	12.7545	22.3159
255998	11.706	1.2788	1.1098		6.03401	12.7625	22.33
256198	11.712	1.2799	1.1105		6.0371	12.7735	22.3441
256398	11.712	1.2808	1.1114		6.0371	12.7824	22.3622
256598	11.718	1.282	1.1125		6.04019	12.7944	22.3843
256798	11.722	1.2829	1.1134		6.04226	12.8034	22.4024
256998	11.724	1.2839	1.1144		6.04329	12.8134	22.4225
257198	11.73	1.285	1.1153		6.04638	12.8244	22.4406
257398	11.724	1.286	1.1159		6.04329	12.8343	22.4527
257598	11.716	1.2869	1.1165		6.03916	12.8433	22.4648
257798	11.714	1.2878	1.1171		6.03813	12.8523	22.4769
257998	11.724	1.2889	1.1177		6.04329	12.8633	22.4889
258198	11.732	1.2898	1.1185		6.04741	12.8723	22.505
258398	11.746	1.2909	1.1191		6.05463	12.8832	22.5171
258598	11.756	1.2919	1.1198		6.05978	12.8932	22.5312
258798	11.766	1.2928	1.1204		6.06494	12.9022	22.5433
258998	11.784	1.2939	1.1212		6.07421	12.9132	22.5594
259198	11.788	1.295	1.1223		6.07628	12.9242	22.5815
259398	11.798	1.296	1.1229		6.08143	12.9341	22.5936
259598	11.808	1.2968	1.1236		6.08658	12.9421	22.6076
259798	11.82	1.2981	1.1241		6.09277	12.9551	22.6177
259998	11.82	1.2988	1.125		6.09277	12.9621	22.6358
260198	11.828	1.2999	1.1256		6.09689	12.9731	22.6479
260398	11.838	1.3009	1.1261		6.10205	12.983	22.6579
260598	11.84	1.3018	1.1268		6.10308	12.992	22.672
260798	11.844	1.3029	1.1275		6.10514	13.003	22.6861
260998	11.846	1.3039	1.1284		6.10617	13.013	22.7042
261198	11.836	1.3047	1.1296		6.10102	13.021	22.7284
261398	11.844	1.3059	1.1302		6.10514	13.0329	22.7404
261598	11.85	1.3069	1.1308		6.10823	13.0429	22.7525
261798	11.83	1.3075	1.1319		6.09793	13.0489	22.7746
261998	11.84	1.3087	1.1328		6.10308	13.0609	22.7928
262198	11.844	1.3099	1.1338		6.10514	13.0729	22.8129
262398	11.848	1.3109	1.1347		6.1072	13.0828	22.831
262598	11.852	1.3118	1.1356		6.10927	13.0918	22.8491
262798	11.856	1.3128	1.1364		6.11133	13.1018	22.8652
262998	11.862	1.3139	1.1374		6.11442	13.1128	22.8853
263198	11.866	1.315	1.1382		6.11648	13.1238	22.9014
263398	11.87	1.316	1.1391		6.11854	13.1337	22.9195
263598	11.872	1.317	1.14		6.11957	13.1437	22.9376
263798	11.88	1.3179	1.1409		6.1237	13.1527	22.9557
263998	11.882	1.3191	1.1419		6.12473	13.1647	22.9759
264198	11.848	1.3202	1.1436		6.1072	13.1756	23.0101
264398	11.834	1.321	1.1451		6.09999	13.1836	23.0402
264598	11.826	1.3219	1.1456		6.09586	13.1926	23.0503
264798	11.826	1.3228	1.1463		6.09586	13.2016	23.0644
264998	11.832	1.3239	1.1468		6.09896	13.2126	23.0744
265198	11.836	1.3248	1.1473		6.10102	13.2216	23.0845
265398	11.844	1.3258	1.1479		6.10514	13.2315	23.0966
265598	11.852	1.327	1.1484		6.10927	13.2435	23.1066
265798	11.858	1.328	1.1492		6.11236	13.2535	23.1227
265998	11.864	1.329	1.1499		6.11545	13.2635	23.1368
266198	11.864	1.3299	1.151		6.11545	13.2725	23.159
266398	11.864	1.331	1.1518		6.11545	13.2834	23.1751
266598	11.862	1.3319	1.1528		6.11442	13.2924	23.1952
266798	11.864	1.333	1.1538		6.11545	13.3034	23.2153
266998	11.86	1.3338	1.1548		6.11339	13.3114	23.2354
267198	11.866	1.3348	1.1557		6.11648	13.3214	23.2535
267398	11.872	1.3358	1.1568		6.11957	13.3313	23.2757
267598	11.88	1.3368	1.158		6.1237	13.3413	23.2998
267798	11.888	1.3379	1.1592		6.12782	13.3523	23.3239
267998	11.896	1.3389	1.1603		6.13195	13.3623	23.3461
268198	11.896	1.3399	1.1612		6.13195	13.3723	23.3642
268398	11.904	1.3409	1.1622		6.13607	13.3822	23.3843
268598	11.91	1.3419	1.1632		6.13916	13.3922	23.4044
268798	11.566	1.3407	1.1678		5.96184	13.3802	23.497
268998	11.366	1.3415	1.172		5.85875	13.3882	23.5815
269198	11.338	1.3431	1.1732		5.84432	13.4042	23.6056
269398	11.35	1.3448	1.1741		5.8505	13.4212	23.6237
269598	11.39	1.3471	1.1749		5.87112	13.4441	23.6398
269798	11.51	1.349	1.1756		5.93298	13.4631	23.6539
269998	11.41	1.3481	1.1765		5.88143	13.4541	23.672
270198	11.446	1.3492	1.177		5.89999	13.4651	23.6821
270398	11.48	1.3507	1.1779		5.91751	13.48	23.7002
270598	11.514	1.3521	1.1787		5.93504	13.494	23.7163
270798	11.528	1.353	1.1795		5.94226	13.503	23.7324
270998	11.508	1.3538	1.1806		5.93195	13.511	23.7545
271198	11.488	1.3551	1.1837		5.92164	13.524	23.8169
271398	11.466	1.3557	1.1854		5.9103	13.5299	23.8511
271598	11.462	1.357	1.1873		5.90823	13.5429	23.8893
271798	11.458	1.358	1.189		5.90617	13.5529	23.9235
271998	11.462	1.359	1.1902		5.90823	13.5629	23.9477
272198	11.454	1.3599	1.1918		5.90411	13.5719	23.9799
272398	11.448	1.3607	1.1931		5.90102	13.5798	24.006
272598	11.45	1.3618	1.1939		5.90205	13.5908	24.0221
272798	11.45	1.3629	1.1948		5.90205	13.6018	24.0402
272998	11.454	1.3638	1.1958		5.90411	13.6108	24.0604
273198	11.454	1.3649	1.1969		5.90411	13.6218	24.0825
273398	11.458	1.366	1.1981		5.90617	13.6327	24.1066
273598	11.458	1.3669	1.1993		5.90617	13.6417	24.1308
273798	11.458	1.3679	1.2005		5.90617	13.6517	24.1549
273998	11.38	1.3687	1.2026		5.86597	13.6597	24.1972
274198	11.322	1.3699	1.2065		5.83607	13.6717	24.2757
274398	11.274	1.371	1.2095		5.81133	13.6826	24.336
274598	11.25	1.3718	1.2114		5.79896	13.6906	24.3742
274798	11.238	1.3729	1.2131		5.79277	13.7016	24.4085
274998	11.234	1.3739	1.2146		5.79071	13.7116	24.4386
275198	11.23	1.3749	1.2158		5.78865	13.7216	24.4628
275398	11.226	1.3758	1.2173		5.78659	13.7305	24.493
275598	11.22	1.3769	1.2185		5.78349	13.7415	24.5171
275798	11.22	1.3779	1.2202		5.78349	13.7515	24.5513
275998	11.212	1.3788	1.2219		5.77937	13.7605	24.5855
276198	11.206	1.38	1.2241		5.77628	13.7725	24.6298
276398	11.196	1.3809	1.2265		5.77112	13.7814	24.6781
276598	11.202	1.3819	1.2284		5.77421	13.7914	24.7163
276798	11.206	1.383	1.2301		5.77628	13.8024	24.7505
276998	11.202	1.3838	1.2319		5.77421	13.8104	24.7867
277198	11.202	1.3848	1.2337		5.77421	13.8204	24.8229
277398	11.212	1.3859	1.2354		5.77937	13.8313	24.8571
277598	11.21	1.3869	1.237		5.77834	13.8413	24.8893
277798	11.216	1.3879	1.2385		5.78143	13.8513	24.9195
277998	11.21	1.3888	1.2397		5.77834	13.8603	24.9437
278198	11.212	1.3898	1.2413		5.77937	13.8703	24.9759
278398	11.214	1.3909	1.2427		5.7804	13.8812	25.004
278598	11.218	1.3918	1.2442		5.78246	13.8902	25.0342
278798	11.224	1.3929	1.2455		5.78555	13.9012	25.0604
278998	11.226	1.394	1.2469		5.78659	13.9122	25.0885
279198	11.23	1.3949	1.2484		5.78865	13.9212	25.1187
279398	11.234	1.3959	1.2497		5.79071	13.9311	25.1449
279598	11.238	1.3968	1.251		5.79277	13.9401	25.171
279798	11.246	1.3978	1.2524		5.79689	13.9501	25.1992
279998	11.234	1.3991	1.2544		5.79071	13.9631	25.2394
280198	11.218	1.3999	1.2565		5.78246	13.9711	25.2817
280398	11.21	1.4009	1.2584		5.77834	13.981	25.3199
280598	11.206	1.4018	1.2597		5.77628	13.99	25.3461
280798	11.204	1.4027	1.2611		5.77525	13.999	25.3742
280998	11.206	1.4039	1.2626		5.77628	14.011	25.4044
281198	11.204	1.4048	1.2639		5.77525	14.02	25.4306
281398	11.204	1.4058	1.265		5.77525	14.0299	25.4527
281598	11.204	1.4069	1.2663		5.77525	14.0409	25.4789
281798	11.202	1.4078	1.2676		5.77421	14.0499	25.505
281998	11.136	1.4092	1.2702		5.74019	14.0639	25.5573
282198	11.112	1.4099	1.2717		5.72782	14.0709	25.5875
282398	11.106	1.4108	1.2729		5.72473	14.0798	25.6117
282598	11.104	1.4118	1.2742		5.7237	14.0898	25.6378
282798	11.086	1.4129	1.2759		5.71442	14.1008	25.672
282998	11.062	1.4139	1.2788		5.70205	14.1108	25.7304
283198	11.048	1.4148	1.2807		5.69483	14.1198	25.7686
283398	11.04	1.4156	1.2822		5.69071	14.1277	25.7988
283598	11.042	1.4168	1.2837		5.69174	14.1397	25.829
283798	11.042	1.4177	1.2854		5.69174	14.1487	25.8632
283998	11.042	1.4187	1.2868		5.69174	14.1587	25.8913
284198	11.036	1.4198	1.2885		5.68865	14.1697	25.9256
284398	11.012	1.421	1.2915		5.67628	14.1816	25.9859
284598	11.002	1.4218	1.2937		5.67112	14.1896	26.0302
284798	10.994	1.4229	1.2955		5.667	14.2006	26.0664
284998	10.992	1.4239	1.2972		5.66597	14.2106	26.1006
285198	10.992	1.425	1.299		5.66597	14.2216	26.1368
285398	10.99	1.4259	1.3004		5.66494	14.2305	26.165
285598	10.992	1.4269	1.3018		5.66597	14.2405	26.1932
285798	10.992	1.4279	1.3031		5.66597	14.2505	26.2193
285998	10.992	1.4287	1.3047		5.66597	14.2585	26.2515
286198	10.994	1.4297	1.3062		5.667	14.2685	26.2817
286398	10.988	1.4309	1.308		5.66391	14.2804	26.3179
286598	10.982	1.4318	1.3097		5.66081	14.2894	26.3521
286798	10.98	1.4329	1.3112		5.65978	14.3004	26.3823
286998	10.98	1.4337	1.3127		5.65978	14.3084	26.4125
287198	10.984	1.4349	1.3143		5.66184	14.3204	26.4447
287398	10.994	1.4358	1.3159		5.667	14.3293	26.4769
287598	10.992	1.4367	1.318		5.66597	14.3383	26.5191
287798	10.994	1.4377	1.3196		5.667	14.3483	26.5513
287998	10.978	1.4388	1.3213		5.65875	14.3593	26.5855
288198	10.968	1.4399	1.323		5.6536	14.3703	26.6197
288398	10.918	1.4412	1.3255		5.62782	14.3832	26.67
288598	10.684	1.4411	1.3296		5.5072	14.3822	26.7525
288798	10.594	1.4425	1.332		5.46081	14.3962	26.8008
288998	10.61	1.4431	1.3332		5.46906	14.4022	26.8249
289198	10.618	1.4446	1.3345		5.47318	14.4172	26.8511
289398	10.656	1.4462	1.3356		5.49277	14.4331	26.8732
289598	10.65	1.4468	1.337		5.48968	14.4391	26.9014
289798	10.626	1.4477	1.3395		5.47731	14.4481	26.9517
289998	10.626	1.4487	1.3414		5.47731	14.4581	26.9899
290198	10.638	1.45	1.3427		5.48349	14.4711	27.0161
290398	10.64	1.4508	1.3438		5.48452	14.479	27.0382
290598	10.65	1.4519	1.3448		5.48968	14.49	27.0584
290798	10.656	1.4528	1.3458		5.49277	14.499	27.0785
290998	10.664	1.4538	1.3468		5.4969	14.509	27.0986
291198	10.674	1.4548	1.3479		5.50205	14.519	27.1207
291398	10.68	1.4558	1.3489		5.50514	14.5289	27.1408
291598	10.686	1.4566	1.35		5.50824	14.5369	27.163
291798	10.696	1.4578	1.351		5.51339	14.5489	27.1831
291998	10.704	1.4588	1.3522		5.51751	14.5589	27.2072
292198	10.716	1.4598	1.3533		5.5237	14.5689	27.2294
292398	10.72	1.4608	1.3546		5.52576	14.5788	27.2555
292598	10.728	1.4617	1.3558		5.52989	14.5878	27.2797
292798	10.738	1.4629	1.3571		5.53504	14.5998	27.3058
292998	10.72	1.4638	1.3586		5.52576	14.6088	27.336
293198	10.69	1.4649	1.3612		5.5103	14.6198	27.3883
293398	10.68	1.4657	1.3634		5.50514	14.6277	27.4326
293598	10.674	1.4668	1.3656		5.50205	14.6387	27.4769
293798	10.498	1.4674	1.369		5.41133	14.6447	27.5453
293998	10.454	1.4693	1.3738		5.38865	14.6637	27.6419
294198	10.394	1.4694	1.3756		5.35772	14.6647	27.6781
294398	10.406	1.4711	1.3772		5.36391	14.6816	27.7103
294598	10.386	1.4717	1.3788		5.3536	14.6876	27.7425
294798	10.388	1.4728	1.3799		5.35463	14.6986	27.7646
294998	10.384	1.4738	1.3812		5.35257	14.7086	27.7907
295198	10.39	1.4748	1.3824		5.35566	14.7186	27.8149
295398	10.39	1.4758	1.3834		5.35566	14.7285	27.835
295598	10.392	1.4766	1.3845		5.35669	14.7365	27.8571
295798	10.398	1.4778	1.3854		5.35978	14.7485	27.8753
295998	10.364	1.4788	1.388		5.34226	14.7585	27.9276
296198	10.33	1.48	1.3898		5.32473	14.7705	27.9638
296398	10.286	1.4811	1.3911		5.30205	14.7814	27.9899
296598	10.196	1.4823	1.3927		5.25566	14.7934	28.0221
296798	10.148	1.4827	1.3951		5.23092	14.7974	28.0704
296998	10.136	1.4835	1.3963		5.22473	14.8054	28.0946
297198	10.138	1.4847	1.3972		5.22576	14.8174	28.1127
297398	10.132	1.4858	1.3982		5.22267	14.8283	28.1328
297598	10.124	1.4867	1.3989		5.21855	14.8373	28.1469
297798	10.116	1.4875	1.3993		5.21442	14.8453	28.1549
297998	10.12	1.4887	1.4002		5.21648	14.8573	28.173
298198	10.122	1.4898	1.4011		5.21751	14.8683	28.1911
298398	10.118	1.4907	1.4018		5.21545	14.8772	28.2052
298598	10.116	1.4918	1.4022		5.21442	14.8882	28.2133
298798	10.114	1.4927	1.4029		5.21339	14.8972	28.2274
298998	10.112	1.4938	1.4035		5.21236	14.9082	28.2394
299198	9.876	1.4947	1.4008		5.09071	14.9172	28.1851
299398	9.856	1.4957	1.4015		5.0804	14.9271	28.1992
299598	9.844	1.4968	1.4022		5.07422	14.9381	28.2133
299798	9.836	1.4976	1.4029		5.07009	14.9461	28.2274
299998	9.838	1.4987	1.4035		5.07112	14.9571	28.2394
300198	9.844	1.4999	1.4042		5.07422	14.9691	28.2535
300398	9.846	1.5008	1.4049		5.07525	14.978	28.2676
300598	9.85	1.5019	1.4056		5.07731	14.989	28.2817
300798	9.852	1.5028	1.4062		5.07834	14.998	28.2938
300998	9.854	1.5037	1.4068		5.07937	15.007	28.3058
301198	9.856	1.5047	1.4075		5.0804	15.017	28.3199
301398	9.862	1.5057	1.4081		5.08349	15.0269	28.332
301598	9.656	1.507	1.4102		4.97731	15.0399	28.3742
301798	9.532	1.508	1.4115		4.91339	15.0499	28.4004
301998	9.108	1.5081	1.4171		4.69484	15.0509	28.5131
302198	9.114	1.5099	1.4187		4.69793	15.0689	28.5453
302398	9.104	1.5107	1.4198		4.69277	15.0768	28.5674
302598	9.092	1.5119	1.4209		4.68659	15.0888	28.5895
302798	9.082	1.5127	1.4219		4.68143	15.0968	28.6097
302998	9.082	1.5138	1.423		4.68143	15.1078	28.6318
303198	9.08	1.5148	1.4241		4.6804	15.1178	28.6539
303398	9.074	1.5157	1.4255		4.67731	15.1267	28.6821
303598	9.072	1.5167	1.4268		4.67628	15.1367	28.7082
303798	9.072	1.5177	1.4282		4.67628	15.1467	28.7364
303998	9.066	1.5187	1.4294		4.67319	15.1567	28.7606
304198	9.062	1.5197	1.4308		4.67112	15.1667	28.7887
304398	9.062	1.5207	1.4321		4.67112	15.1766	28.8149
304598	9.064	1.5216	1.4334		4.67215	15.1856	28.841
304798	9.062	1.5227	1.4348		4.67112	15.1966	28.8692
304998	9.062	1.5237	1.4361		4.67112	15.2066	28.8954
305198	9.058	1.5247	1.4375		4.66906	15.2166	28.9235
305398	9.058	1.5256	1.4388		4.66906	15.2255	28.9497
305598	9.06	1.5266	1.4401		4.67009	15.2355	28.9759
305798	9.056	1.5276	1.4414		4.66803	15.2455	29.002
305998	9.056	1.5287	1.4433		4.66803	15.2565	29.0402
306198	9.058	1.5297	1.4449		4.66906	15.2665	29.0724
306398	9.058	1.5307	1.4464		4.66906	15.2764	29.1026
306598	9.064	1.5318	1.4478		4.67215	15.2874	29.1308
306798	9.062	1.5329	1.4492		4.67112	15.2984	29.159
306998	9.056	1.5336	1.4503		4.66803	15.3054	29.1811
307198	9.06	1.5346	1.4515		4.67009	15.3154	29.2052
307398	9.064	1.5357	1.4529		4.67215	15.3263	29.2334
307598	9.06	1.5367	1.4542		4.67009	15.3363	29.2596
307798	9.062	1.5376	1.4557		4.67112	15.3453	29.2897
307998	9.064	1.5386	1.457		4.67215	15.3553	29.3159
308198	9.058	1.5397	1.4582		4.66906	15.3663	29.34
308398	9.056	1.5406	1.4595		4.66803	15.3752	29.3662
308598	9.06	1.5417	1.4609		4.67009	15.3862	29.3944
308798	9.058	1.5427	1.4621		4.66906	15.3962	29.4185
308998	9.06	1.5436	1.4633		4.67009	15.4052	29.4427
309198	9.066	1.5447	1.4646		4.67319	15.4162	29.4688
309398	9.066	1.5458	1.4658		4.67319	15.4271	29.493
309598	9.068	1.5466	1.4669		4.67422	15.4351	29.5151
309798	9.072	1.5477	1.4681		4.67628	15.4461	29.5392
309998	9.08	1.5487	1.4693		4.6804	15.4561	29.5634
310198	9.082	1.5497	1.4704		4.68143	15.4661	29.5855
310398	9.082	1.5507	1.4715		4.68143	15.476	29.6076
310598	9.088	1.5515	1.4727		4.68453	15.484	29.6318
310798	9.09	1.5527	1.4738		4.68556	15.496	29.6539
310998	9.094	1.5538	1.4751		4.68762	15.507	29.6801
311198	9.096	1.5548	1.4762		4.68865	15.517	29.7022
311398	9.096	1.5557	1.4775		4.68865	15.5259	29.7284
311598	9.1	1.5567	1.4786		4.69071	15.5359	29.7505
311798	9.104	1.5577	1.4798		4.69277	15.5459	29.7746
311998	9.11	1.5587	1.4809		4.69587	15.5559	29.7968
312198	9.114	1.5596	1.4823		4.69793	15.5649	29.8249
312398	9.114	1.5606	1.4833		4.69793	15.5749	29.8451
312598	9.118	1.5616	1.4846		4.69999	15.5848	29.8712
312798	9.122	1.5627	1.4858		4.70205	15.5958	29.8954
312998	9.12	1.5638	1.487		4.70102	15.6068	29.9195
313198	9.122	1.5647	1.4883		4.70205	15.6158	29.9457
313398	9.124	1.5658	1.4897		4.70308	15.6267	29.9738
313598	9.128	1.5668	1.4911		4.70514	15.6367	30.002
313798	9.12	1.5677	1.4924		4.70102	15.6457	30.0282
313998	9.12	1.5684	1.4935		4.70102	15.6527	30.0503
314198	9.126	1.5695	1.4947		4.70411	15.6637	30.0744
314398	9.13	1.5704	1.4962		4.70618	15.6727	30.1046
314598	9.132	1.5716	1.4976		4.70721	15.6846	30.1328
314798	9.136	1.5726	1.4989		4.70927	15.6946	30.159
314998	9.138	1.5736	1.5002		4.7103	15.7046	30.1851
315198	9.142	1.5745	1.5015		4.71236	15.7136	30.2113
315398	9.146	1.5756	1.503		4.71442	15.7246	30.2414
315598	9.148	1.5766	1.5045		4.71545	15.7345	30.2716
315798	9.148	1.5776	1.5062		4.71545	15.7445	30.3058
315998	9.15	1.5787	1.5076		4.71648	15.7555	30.334
316198	9.148	1.5796	1.509		4.71545	15.7645	30.3622
316398	9.15	1.5806	1.5104		4.71648	15.7745	30.3903
316598	9.16	1.5818	1.5118		4.72164	15.7864	30.4185
316798	9.156	1.5826	1.5133		4.71958	15.7944	30.4487
316998	9.158	1.5835	1.5146		4.72061	15.8034	30.4748
317198	9.164	1.5846	1.516		4.7237	15.8144	30.503
317398	9.166	1.5855	1.5173		4.72473	15.8234	30.5292
317598	9.174	1.5866	1.5188		4.72886	15.8343	30.5594
317798	9.176	1.5875	1.5201		4.72989	15.8433	30.5855
317998	9.186	1.5888	1.5218		4.73504	15.8563	30.6197
318198	9.182	1.5898	1.5235		4.73298	15.8663	30.6539
318398	9.186	1.5908	1.5248		4.73504	15.8762	30.6801
318598	9.182	1.5917	1.5263		4.73298	15.8852	30.7103
318798	9.176	1.5926	1.5278		4.72989	15.8942	30.7404
318998	9.17	1.5938	1.5295		4.72679	15.9062	30.7746
319198	9.162	1.5947	1.5313		4.72267	15.9152	30.8109
319398	9.162	1.5956	1.5328		4.72267	15.9242	30.841
319598	9.16	1.5967	1.5343		4.72164	15.9351	30.8712
319798	9.166	1.5978	1.5357		4.72473	15.9461	30.8994
319998	9.16	1.5987	1.5372		4.72164	15.9551	30.9296
320198	9.156	1.5997	1.5385		4.71958	15.9651	30.9557
320398	9.154	1.6007	1.5394		4.71855	15.975	30.9738
320598	9.148	1.6016	1.5416		4.71545	15.984	31.0181
320798	9.134	1.6028	1.5436		4.70824	15.996	31.0584
320998	9.116	1.6038	1.5453		4.69896	16.006	31.0926
321198	9.086	1.6046	1.5475		4.6835	16.014	31.1368
321398	9.032	1.6057	1.5498		4.65566	16.025	31.1831
321598	8.956	1.6066	1.5516		4.61648	16.0339	31.2193
321798	8.858	1.6075	1.5537		4.56597	16.0429	31.2616
321998	8.796	1.6089	1.5559		4.53401	16.0569	31.3058
322198	8.756	1.6097	1.5574		4.51339	16.0649	31.336
322398	8.7	1.6109	1.5605		4.48453	16.0768	31.3984
322598	8.66	1.6116	1.5621		4.46391	16.0838	31.4306
322798	8.646	1.6124	1.5632		4.45669	16.0918	31.4527
322998	8.638	1.6133	1.5645		4.45257	16.1008	31.4789
323198	8.634	1.6145	1.5656		4.45051	16.1128	31.501
323398	8.628	1.6158	1.567		4.44741	16.1257	31.5292
323598	8.556	1.6165	1.5683		4.4103	16.1327	31.5553
323798	8.476	1.6176	1.5698		4.36906	16.1437	31.5855
323998	8.336	1.6187	1.5715		4.2969	16.1547	31.6197
324198	8.18	1.6198	1.5737		4.21649	16.1657	31.664
324398	8.074	1.621	1.5764		4.16185	16.1776	31.7183
324598	7.992	1.6218	1.5784		4.11958	16.1856	31.7586
324798	7.956	1.6227	1.5802		4.10102	16.1946	31.7948
324998	7.934	1.6236	1.5815		4.08968	16.2036	31.8209
325198	7.91	1.6247	1.5829		4.07731	16.2146	31.8491
325398	7.896	1.6257	1.5843		4.07009	16.2246	31.8773
325598	7.884	1.6267	1.5856		4.06391	16.2345	31.9034
325798	7.87	1.6275	1.5868		4.05669	16.2425	31.9276
325998	7.864	1.6286	1.5878		4.0536	16.2535	31.9477
326198	7.858	1.6296	1.5889		4.05051	16.2635	31.9698
326398	7.858	1.6305	1.59		4.05051	16.2725	31.992
326598	7.856	1.6317	1.5911		4.04948	16.2844	32.0141
326798	7.848	1.6328	1.5921		4.04535	16.2954	32.0342
326998	7.846	1.6338	1.5931		4.04432	16.3054	32.0543
327198	7.844	1.6347	1.5941		4.04329	16.3144	32.0744
327398	7.834	1.6358	1.5951		4.03814	16.3253	32.0946
327598	7.83	1.6366	1.5959		4.03607	16.3333	32.1107
327798	7.83	1.6374	1.5967		4.03607	16.3413	32.1268
327998	7.828	1.6388	1.5978		4.03504	16.3553	32.1489
328198	7.818	1.6399	1.5992		4.02989	16.3663	32.1771
328398	7.804	1.6407	1.6005		4.02267	16.3743	32.2032
328598	7.8	1.6416	1.6015		4.02061	16.3832	32.2233
328798	7.8	1.6428	1.6025		4.02061	16.3952	32.2435
328998	7.8	1.6438	1.6036		4.02061	16.4052	32.2656
329198	7.792	1.6446	1.6046		4.01649	16.4132	32.2857
329398	7.788	1.6456	1.6057		4.01442	16.4232	32.3078
329598	7.782	1.6467	1.6068		4.01133	16.4341	32.33
329798	7.78	1.6477	1.6077		4.0103	16.4441	32.3481
329998	7.776	1.6486	1.6087		4.00824	16.4531	32.3682
330198	7.774	1.6495	1.6099		4.00721	16.4621	32.3924
330398	7.774	1.6505	1.6109		4.00721	16.4721	32.4125
330598	7.774	1.6515	1.6119		4.00721	16.482	32.4326
330798	7.774	1.6526	1.6131		4.00721	16.493	32.4567
330998	7.774	1.6535	1.6141		4.00721	16.502	32.4769
331198	7.776	1.6546	1.6153		4.00824	16.513	32.501
331398	7.776	1.6556	1.6163		4.00824	16.523	32.5211
331598	7.772	1.6565	1.6176		4.00618	16.5319	32.5473
331798	7.774	1.6575	1.6186		4.00721	16.5419	32.5674
331998	7.77	1.6585	1.6197		4.00515	16.5519	32.5895
332198	7.776	1.6596	1.6208		4.00824	16.5629	32.6117
332398	7.774	1.6607	1.6219		4.00721	16.5739	32.6338
332598	7.766	1.6616	1.6234		4.00308	16.5828	32.664
332798	7.768	1.6626	1.6247		4.00412	16.5928	32.6901
332998	7.764	1.6636	1.6259		4.00205	16.6028	32.7143
333198	7.76	1.6646	1.6273		3.99999	16.6128	32.7425
333398	7.758	1.6656	1.6288		3.99896	16.6228	32.7726
333598	7.752	1.6665	1.6299		3.99587	16.6317	32.7948
333798	7.752	1.6677	1.631		3.99587	16.6437	32.8169
333998	7.75	1.6686	1.6323		3.99484	16.6527	32.8431
334198	7.74	1.6696	1.6335		3.98968	16.6627	32.8672
334398	7.738	1.6705	1.6345		3.98865	16.6717	32.8873
334598	7.736	1.6715	1.6356		3.98762	16.6816	32.9095
334798	7.736	1.6726	1.6367		3.98762	16.6926	32.9316
334998	7.736	1.6737	1.6378		3.98762	16.7036	32.9537
335198	7.73	1.6746	1.639		3.98453	16.7126	32.9779
335398	7.728	1.6755	1.64		3.9835	16.7216	32.998
335598	7.726	1.6766	1.641		3.98247	16.7325	33.0181
335798	7.726	1.6775	1.6419		3.98247	16.7415	33.0362
335998	7.724	1.6785	1.6431		3.98143	16.7515	33.0604
336198	7.72	1.6795	1.6441		3.97937	16.7615	33.0805
336398	7.72	1.6805	1.6453		3.97937	16.7715	33.1046
336598	7.718	1.6816	1.6464		3.97834	16.7824	33.1268
336798	7.716	1.6824	1.6475		3.97731	16.7904	33.1489
336998	7.718	1.6836	1.6486		3.97834	16.8024	33.171
337198	7.716	1.6845	1.6496		3.97731	16.8114	33.1911
337398	7.712	1.6855	1.6507		3.97525	16.8214	33.2133
337598	7.716	1.6866	1.6516		3.97731	16.8323	33.2314
337798	7.71	1.6877	1.6527		3.97422	16.8433	33.2535
337998	7.704	1.6886	1.6539		3.97113	16.8523	33.2777
338198	7.702	1.6895	1.6549		3.97009	16.8613	33.2978
338398	7.694	1.6905	1.6559		3.96597	16.8713	33.3179
338598	7.69	1.6915	1.657		3.96391	16.8812	33.34
338798	7.69	1.6925	1.6582		3.96391	16.8912	33.3642
338998	7.688	1.6936	1.6594		3.96288	16.9022	33.3883
339198	7.688	1.6946	1.6607		3.96288	16.9122	33.4145
339398	7.688	1.6954	1.6617		3.96288	16.9202	33.4346
339598	7.688	1.6966	1.663		3.96288	16.9321	33.4608
339798	7.688	1.6977	1.6641		3.96288	16.9431	33.4829
339998	7.69	1.6986	1.6653		3.96391	16.9521	33.507
340198	7.688	1.6996	1.6665		3.96288	16.9621	33.5312
340398	7.69	1.7006	1.6678		3.96391	16.9721	33.5573
340598	7.69	1.7016	1.6689		3.96391	16.982	33.5795
340798	7.692	1.7026	1.6701		3.96494	16.992	33.6036
340998	7.69	1.7036	1.6711		3.96391	17.002	33.6237
341198	7.69	1.7045	1.6723		3.96391	17.011	33.6479
341398	7.69	1.7057	1.6734		3.96391	17.023	33.67
341598	7.688	1.7066	1.6745		3.96288	17.0319	33.6922
341798	7.686	1.7075	1.6757		3.96185	17.0409	33.7163
341998	7.68	1.7084	1.6769		3.95875	17.0499	33.7404
342198	7.678	1.7095	1.678		3.95772	17.0609	33.7626
342398	7.676	1.7106	1.6792		3.95669	17.0719	33.7867
342598	7.674	1.7117	1.6805		3.95566	17.0828	33.8129
342798	7.672	1.7127	1.6817		3.95463	17.0928	33.837
342998	7.666	1.7136	1.683		3.95154	17.1018	33.8632
343198	7.666	1.7146	1.6842		3.95154	17.1118	33.8873
343398	7.66	1.7155	1.6854		3.94845	17.1208	33.9115
343598	7.66	1.7165	1.6867		3.94845	17.1307	33.9376
343798	7.648	1.7175	1.6887		3.94226	17.1407	33.9779
343998	7.644	1.7186	1.6911		3.9402	17.1517	34.0262
344198	7.63	1.7197	1.6927		3.93298	17.1627	34.0584
344398	7.622	1.7207	1.6943		3.92886	17.1727	34.0905
344598	7.616	1.7216	1.6955		3.92576	17.1816	34.1147
344798	7.61	1.7225	1.6969		3.92267	17.1906	34.1429
344998	7.604	1.7236	1.698		3.91958	17.2016	34.165
345198	7.604	1.7246	1.6993		3.91958	17.2116	34.1911
345398	7.592	1.7257	1.7009		3.91339	17.2226	34.2233
345598	7.582	1.7266	1.7024		3.90824	17.2315	34.2535
345798	7.58	1.7276	1.7036		3.90721	17.2415	34.2777
345998	7.574	1.7287	1.7049		3.90412	17.2525	34.3038
346198	7.556	1.7295	1.7065		3.89484	17.2605	34.336
346398	7.526	1.7306	1.7089		3.87937	17.2715	34.3843
346598	7.504	1.7317	1.7112		3.86803	17.2824	34.4306
346798	7.486	1.7327	1.713		3.85875	17.2924	34.4668
346998	7.47	1.7337	1.7145		3.85051	17.3024	34.497
347198	7.46	1.7346	1.7159		3.84535	17.3114	34.5252
347398	7.442	1.7356	1.7174		3.83607	17.3214	34.5553
347598	7.428	1.7364	1.7188		3.82886	17.3293	34.5835
347798	7.422	1.7374	1.7202		3.82577	17.3393	34.6117
347998	7.416	1.7385	1.7216		3.82267	17.3503	34.6398
348198	7.41	1.7394	1.7229		3.81958	17.3593	34.666
348398	7.398	1.7405	1.7244		3.81339	17.3703	34.6962
348598	7.334	1.7422	1.7269		3.7804	17.3872	34.7465
348798	7.292	1.7426	1.7286		3.75875	17.3912	34.7807
348998	7.274	1.7431	1.7297		3.74948	17.3962	34.8028
349198	7.272	1.7442	1.7311		3.74845	17.4072	34.831
349398	7.268	1.7455	1.7327		3.74638	17.4202	34.8632
349598	7.248	1.7468	1.7346		3.73607	17.4331	34.9014
349798	7.228	1.7474	1.7365		3.72577	17.4391	34.9396
349998	7.218	1.7484	1.7381		3.72061	17.4491	34.9718
350198	7.212	1.7495	1.7395		3.71752	17.4601	35
350398	7.204	1.7505	1.7408		3.71339	17.4701	35.0262
350598	7.2	1.7515	1.7421		3.71133	17.48	35.0523
350798	7.19	1.7524	1.7432		3.70618	17.489	35.0744
350998	7.184	1.7536	1.7444		3.70308	17.501	35.0986
351198	7.18	1.7546	1.7456		3.70102	17.511	35.1227
351398	7.172	1.7555	1.747		3.6969	17.52	35.1509
351598	7.166	1.7565	1.7481		3.69381	17.5299	35.173
351798	7.154	1.7574	1.7497		3.68762	17.5389	35.2052
351998	7.15	1.7584	1.7509		3.68556	17.5489	35.2294
352198	7.148	1.7595	1.7524		3.68453	17.5599	35.2596
352398	7.144	1.7605	1.7536		3.68247	17.5699	35.2837
352598	7.142	1.7615	1.7549		3.68144	17.5798	35.3099
352798	7.146	1.7625	1.7563		3.6835	17.5898	35.338
352998	7.142	1.7635	1.7576		3.68144	17.5998	35.3642
353198	7.14	1.7645	1.7589		3.6804	17.6098	35.3903
353398	7.138	1.7656	1.7601		3.67937	17.6208	35.4145
353598	7.134	1.7666	1.7613		3.67731	17.6307	35.4386
353798	7.13	1.7676	1.7627		3.67525	17.6407	35.4668
353998	7.122	1.7685	1.7639		3.67113	17.6497	35.4909
354198	7.12	1.7695	1.7652		3.6701	17.6597	35.5171
354398	7.116	1.7704	1.7664		3.66803	17.6687	35.5412
354598	7.114	1.7715	1.7677		3.667	17.6796	35.5674
354798	7.106	1.7725	1.7693		3.66288	17.6896	35.5996
354998	6.954	1.7738	1.7748		3.58453	17.7026	35.7103
355198	6.9	1.7748	1.7785		3.55669	17.7126	35.7847
355398	6.876	1.7756	1.7806		3.54432	17.7206	35.827
355598	6.788	1.7771	1.7833		3.49896	17.7355	35.8813
355798	6.74	1.7777	1.7855		3.47422	17.7415	35.9256
355998	6.712	1.7782	1.7873		3.45979	17.7465	35.9618
356198	6.696	1.7791	1.7887		3.45154	17.7555	35.9899
356398	6.69	1.7804	1.7903		3.44845	17.7685	36.0221
356598	6.68	1.7817	1.7915		3.44329	17.7814	36.0463
356798	6.672	1.7825	1.7928		3.43917	17.7894	36.0724
356998	6.664	1.7835	1.7939		3.43504	17.7994	36.0946
357198	6.652	1.7845	1.7949		3.42886	17.8094	36.1147
357398	6.646	1.7855	1.7962		3.42577	17.8194	36.1408
357598	6.642	1.7864	1.7974		3.4237	17.8283	36.165
357798	6.63	1.7875	1.7986		3.41752	17.8393	36.1891
357998	6.624	1.7885	1.7997		3.41443	17.8493	36.2113
358198	6.612	1.7894	1.8011		3.40824	17.8583	36.2394
358398	6.606	1.7904	1.8024		3.40515	17.8683	36.2656
358598	6.576	1.7916	1.8043		3.38968	17.8802	36.3038
358798	6.548	1.7926	1.8066		3.37525	17.8902	36.3501
358998	6.534	1.7935	1.8085		3.36803	17.8992	36.3883
359198	6.522	1.7944	1.8099		3.36185	17.9082	36.4165
359398	6.51	1.7954	1.8115		3.35566	17.9182	36.4487
359598	6.502	1.7965	1.8131		3.35154	17.9291	36.4809
359798	6.48	1.7974	1.8149		3.3402	17.9381	36.5171
359998	6.462	1.7985	1.8171		3.33092	17.9491	36.5614
360198	6.448	1.7995	1.8188		3.3237	17.9591	36.5956
360398	6.436	1.8004	1.8201		3.31752	17.9681	36.6217
360598	6.424	1.8015	1.8217		3.31133	17.979	36.6539
360798	6.41	1.8026	1.8231		3.30412	17.99	36.6821
360998	6.398	1.8035	1.8245		3.29793	17.999	36.7103
361198	6.39	1.8045	1.8258		3.29381	18.009	36.7364
361398	6.38	1.8055	1.8271		3.28865	18.019	36.7626
361598	6.376	1.8065	1.8286		3.28659	18.0289	36.7928
361798	6.37	1.8074	1.8298		3.2835	18.0379	36.8169
361998	6.362	1.8085	1.8311		3.27937	18.0489	36.8431
362198	6.36	1.8094	1.8326		3.27834	18.0579	36.8732
362398	6.354	1.8104	1.834		3.27525	18.0679	36.9014
362598	6.322	1.8117	1.8356		3.25876	18.0808	36.9336
362798	6.308	1.8125	1.8371		3.25154	18.0888	36.9638
362998	6.298	1.8134	1.8386		3.24638	18.0978	36.994
363198	6.268	1.8148	1.8407		3.23092	18.1118	37.0362
363398	6.244	1.8159	1.8425		3.21855	18.1228	37.0724
363598	6.224	1.8165	1.8441		3.20824	18.1287	37.1046
363798	6.216	1.8174	1.8455		3.20412	18.1377	37.1328
363998	6.21	1.8183	1.8469		3.20102	18.1467	37.161
364198	6.204	1.8196	1.8482		3.19793	18.1597	37.1871
364398	6.194	1.8205	1.8496		3.19278	18.1687	37.2153
364598	6.19	1.8214	1.851		3.19071	18.1776	37.2435
364798	6.184	1.8223	1.8525		3.18762	18.1866	37.2736
364998	6.182	1.8233	1.8537		3.18659	18.1966	37.2978
365198	6.176	1.8243	1.8551		3.1835	18.2066	37.326
365398	6.172	1.8254	1.8566		3.18144	18.2176	37.3561
365598	6.164	1.8263	1.858		3.17731	18.2265	37.3843
365798	6.16	1.8275	1.8594		3.17525	18.2385	37.4125
365998	6.154	1.8283	1.8607		3.17216	18.2465	37.4386
366198	6.15	1.8293	1.8619		3.1701	18.2565	37.4628
366398	6.146	1.8304	1.8632		3.16803	18.2675	37.4889
366598	6.14	1.8314	1.8645		3.16494	18.2774	37.5151
366798	6.132	1.8323	1.8657		3.16082	18.2864	37.5392
366998	6.124	1.8333	1.8669		3.15669	18.2964	37.5634
367198	6.112	1.8345	1.8683		3.15051	18.3084	37.5915
367398	6.1	1.8355	1.8695		3.14432	18.3184	37.6157
367598	6.088	1.8365	1.8709		3.13814	18.3283	37.6439
367798	6.078	1.8375	1.872		3.13298	18.3383	37.666
367998	6.068	1.8383	1.8733		3.12783	18.3463	37.6922
368198	6.058	1.8395	1.8742		3.12267	18.3583	37.7103
368398	6.04	1.8406	1.8755		3.1134	18.3693	37.7364
368598	6.032	1.8418	1.8758		3.10927	18.3812	37.7425
368798	6.016	1.8424	1.8766		3.10102	18.3872	37.7586
368998	5.998	1.8435	1.8778		3.09175	18.3982	37.7827
369198	5.988	1.8444	1.879		3.08659	18.4072	37.8068
369398	5.98	1.8455	1.8803		3.08247	18.4182	37.833
369598	5.968	1.8466	1.8816		3.07628	18.4291	37.8592
369798	5.944	1.8475	1.8832		3.06391	18.4381	37.8913
369998	5.928	1.8487	1.8847		3.05566	18.4501	37.9215
370198	5.9	1.8499	1.8866		3.04123	18.4621	37.9598
370398	5.872	1.8508	1.8886		3.0268	18.4711	38
370598	5.856	1.8516	1.8899		3.01855	18.479	38.0262
370798	5.844	1.8525	1.891		3.01236	18.488	38.0483
370998	5.834	1.8533	1.8922		3.00721	18.496	38.0724
371198	5.83	1.8543	1.8934		3.00515	18.506	38.0966
371398	5.82	1.8555	1.8945		2.99999	18.518	38.1187
371598	5.814	1.8563	1.8956		2.9969	18.5259	38.1408
371798	5.804	1.8573	1.8968		2.99175	18.5359	38.165
371998	5.79	1.8584	1.8983		2.98453	18.5469	38.1952
372198	5.774	1.8596	1.8997		2.97628	18.5589	38.2233
372398	5.76	1.8605	1.9011		2.96907	18.5679	38.2515
372598	5.744	1.8613	1.9025		2.96082	18.5758	38.2797
372798	5.73	1.8624	1.9039		2.9536	18.5868	38.3078
372998	5.72	1.8634	1.9053		2.94845	18.5968	38.336
373198	5.712	1.8644	1.9065		2.94432	18.6068	38.3602
373398	5.706	1.8653	1.9078		2.94123	18.6158	38.3863
373598	5.694	1.8665	1.909		2.93505	18.6277	38.4105
373798	5.68	1.8674	1.9105		2.92783	18.6367	38.4406
373998	5.672	1.8683	1.9119		2.92371	18.6457	38.4688
374198	5.664	1.8694	1.9133		2.91958	18.6567	38.497
374398	5.656	1.8705	1.9145		2.91546	18.6677	38.5211
374598	5.646	1.8715	1.9158		2.9103	18.6776	38.5473
374798	5.64	1.8725	1.9171		2.90721	18.6876	38.5734
374998	5.624	1.8734	1.9186		2.89896	18.6966	38.6036
375198	5.616	1.8742	1.9199		2.89484	18.7046	38.6298
375398	5.598	1.8752	1.9213		2.88556	18.7146	38.6579
375598	5.584	1.8764	1.923		2.87834	18.7265	38.6922
375798	5.574	1.8772	1.9244		2.87319	18.7345	38.7203
375998	5.57	1.8782	1.9261		2.87113	18.7445	38.7545
376198	5.564	1.8793	1.9276		2.86804	18.7555	38.7847
376398	5.556	1.8803	1.9292		2.86391	18.7655	38.8169
376598	5.556	1.8813	1.9308		2.86391	18.7754	38.8491
376798	5.55	1.8823	1.9325		2.86082	18.7854	38.8833
376998	5.546	1.8832	1.9339		2.85876	18.7944	38.9115
377198	5.542	1.8844	1.9357		2.85669	18.8064	38.9477
377398	5.538	1.8853	1.9372		2.85463	18.8154	38.9779
377598	5.536	1.8864	1.9388		2.8536	18.8263	39.0101
377798	5.53	1.8875	1.9405		2.85051	18.8373	39.0443
377998	5.528	1.8884	1.9419		2.84948	18.8463	39.0724
378198	5.52	1.8893	1.9435		2.84535	18.8553	39.1046
378398	5.514	1.8904	1.9452		2.84226	18.8663	39.1388
378598	5.51	1.8913	1.9467		2.8402	18.8752	39.169
378798	5.506	1.8924	1.9483		2.83814	18.8862	39.2012
378998	5.504	1.8933	1.9498		2.83711	18.8952	39.2314
379198	5.504	1.8945	1.9515		2.83711	18.9072	39.2656
379398	5.496	1.8953	1.9531		2.83298	18.9152	39.2978
379598	5.49	1.8964	1.955		2.82989	18.9261	39.336
379798	5.488	1.8974	1.9567		2.82886	18.9361	39.3702
379998	5.478	1.8984	1.9585		2.82371	18.9461	39.4064
380198	5.472	1.8994	1.9603		2.82061	18.9561	39.4427
380398	5.466	1.9004	1.9622		2.81752	18.9661	39.4809
380598	5.464	1.9014	1.9638		2.81649	18.976	39.5131
380798	5.46	1.9023	1.9656		2.81443	18.985	39.5493
380998	5.454	1.9033	1.9674		2.81133	18.995	39.5855
381198	5.446	1.9043	1.9694		2.80721	19.005	39.6258
381398	5.442	1.9055	1.9713		2.80515	19.017	39.664
381598	5.432	1.9065	1.9732		2.79999	19.0269	39.7022
381798	5.424	1.9073	1.9751		2.79587	19.0349	39.7404
381998	5.418	1.9082	1.977		2.79278	19.0439	39.7787
382198	5.412	1.9096	1.9789		2.78968	19.0579	39.8169
382398	5.402	1.9103	1.9808		2.78453	19.0649	39.8551
382598	5.4	1.9114	1.9826		2.7835	19.0758	39.8913
382798	5.396	1.9125	1.9846		2.78144	19.0868	39.9316
382998	5.386	1.9134	1.9864		2.77628	19.0958	39.9678
383198	5.376	1.9144	1.988		2.77113	19.1058	40
383398	5.366	1.9154	1.9898		2.76597	19.1158	40.0362
383598	5.356	1.9164	1.9918		2.76082	19.1257	40.0765
383798	5.346	1.9174	1.9936		2.75566	19.1357	40.1127
383998	5.334	1.9184	1.9953		2.74948	19.1457	40.1469
384198	5.328	1.9193	1.997		2.74639	19.1547	40.1811
384398	5.32	1.9203	1.9987		2.74226	19.1647	40.2153
384598	5.314	1.9213	2.0006		2.73917	19.1747	40.2535
384798	5.308	1.9224	2.0019		2.73608	19.1856	40.2797
384998	5.302	1.9233	2.004		2.73298	19.1946	40.3219
385198	5.296	1.9243	2.0058		2.72989	19.2046	40.3581
385398	5.288	1.9255	2.0074		2.72577	19.2166	40.3903
385598	5.276	1.9264	2.0092		2.71958	19.2255	40.4266
385798	5.268	1.9274	2.0111		2.71546	19.2355	40.4648
385998	5.256	1.9283	2.0127		2.70927	19.2445	40.497
386198	5.242	1.9293	2.0145		2.70206	19.2545	40.5332
386398	5.23	1.9303	2.0164		2.69587	19.2645	40.5714
386598	5.22	1.9314	2.0182		2.69072	19.2754	40.6076
386798	5.208	1.9325	2.0199		2.68453	19.2864	40.6419
386998	5.196	1.9335	2.0215		2.67834	19.2964	40.674
387198	5.18	1.9345	2.0232		2.6701	19.3064	40.7082
387398	5.168	1.9355	2.0251		2.66391	19.3164	40.7465
387598	5.152	1.9366	2.0271		2.65566	19.3273	40.7867
387798	5.14	1.9376	2.029		2.64948	19.3373	40.8249
387998	5.128	1.9386	2.031		2.64329	19.3473	40.8652
388198	5.116	1.9395	2.0327		2.63711	19.3563	40.8994
388398	5.108	1.9404	2.0346		2.63298	19.3653	40.9376
388598	5.1	1.9414	2.0367		2.62886	19.3752	40.9799
388798	5.092	1.9425	2.0385		2.62474	19.3862	41.0161
388998	5.084	1.9434	2.0401		2.62061	19.3952	41.0483
389198	5.078	1.9445	2.0418		2.61752	19.4062	41.0825
389398	5.068	1.9455	2.0441		2.61237	19.4162	41.1288
389598	5.054	1.9465	2.0462		2.60515	19.4261	41.171
389798	5.044	1.9473	2.048		2.59999	19.4341	41.2072
389998	5.038	1.9484	2.0496		2.5969	19.4451	41.2394
390198	5.028	1.9493	2.0514		2.59175	19.4541	41.2757
390398	5.018	1.9503	2.0532		2.58659	19.4641	41.3119
390598	5.004	1.9513	2.0547		2.57938	19.4741	41.3421
390798	4.992	1.9524	2.0566		2.57319	19.485	41.3803
390998	4.976	1.9534	2.0584		2.56494	19.495	41.4165
391198	4.966	1.9543	2.0602		2.55979	19.504	41.4527
391398	4.954	1.9554	2.062		2.5536	19.515	41.4889
391598	4.946	1.9563	2.0636		2.54948	19.524	41.5211
391798	4.94	1.9574	2.0654		2.54639	19.5349	41.5573
391998	4.93	1.9583	2.067		2.54123	19.5439	41.5895
392198	4.922	1.9592	2.0689		2.53711	19.5529	41.6278
392398	4.91	1.9603	2.0709		2.53092	19.5639	41.668
392598	4.9	1.9614	2.0726		2.52577	19.5749	41.7022
392798	4.89	1.9624	2.0745		2.52061	19.5848	41.7404
392998	4.878	1.9634	2.0757		2.51443	19.5948	41.7646
393198	4.87	1.9642	2.0768		2.5103	19.6028	41.7867
393398	4.854	1.9655	2.0785		2.50206	19.6158	41.8209
393598	4.844	1.9663	2.0803		2.4969	19.6238	41.8571
393798	4.834	1.9674	2.082		2.49175	19.6347	41.8913
393998	4.826	1.9684	2.0835		2.48762	19.6447	41.9215
394198	4.82	1.9695	2.085		2.48453	19.6557	41.9517
394398	4.81	1.9704	2.0864		2.47938	19.6647	41.9799
394598	4.804	1.9713	2.0881		2.47628	19.6737	42.0141
394798	4.802	1.9723	2.0896		2.47525	19.6836	42.0443
394998	4.796	1.9734	2.091		2.47216	19.6946	42.0724
395198	4.79	1.9743	2.0926		2.46907	19.7036	42.1046
395398	4.784	1.9753	2.0941		2.46597	19.7136	42.1348
395598	4.782	1.9763	2.0955		2.46494	19.7236	42.163
395798	4.772	1.9773	2.0969		2.45979	19.7335	42.1911
395998	4.77	1.9784	2.0985		2.45876	19.7445	42.2233
396198	4.766	1.9793	2.1		2.4567	19.7535	42.2535
396398	4.756	1.9802	2.1014		2.45154	19.7625	42.2817
396598	4.752	1.9813	2.103		2.44948	19.7735	42.3139
396798	4.744	1.9824	2.1045		2.44536	19.7844	42.3441
396998	4.732	1.9835	2.1059		2.43917	19.7954	42.3722
397198	4.718	1.9844	2.1077		2.43195	19.8044	42.4085
397398	4.71	1.9855	2.1094		2.42783	19.8154	42.4427
397598	4.696	1.9864	2.1108		2.42061	19.8244	42.4708
397798	4.694	1.9873	2.1122		2.41958	19.8333	42.499
397998	4.68	1.9884	2.1139		2.41237	19.8443	42.5332
398198	4.678	1.9894	2.1155		2.41134	19.8543	42.5654
398398	4.672	1.9903	2.1171		2.40824	19.8633	42.5976
[truncated: 33 more rows]

## Sheet: GD-7
Force (small)	--	journey	) Results Report
17:21:53,06/23/2019
Diameter: 49.7	mm	Height: 100.0	mm
Vertical force transducer (Test piece vertical force)
Control mode: displacement	Waveform: Slope
mm/s	Force the finish:2.1076	mm	Confining pressure rate :0.500	MPa/s	End point of confining pressure :6.00060	MPa
Time (ms)	Vertical force (KN)	Vertical deformation (mm)	Confining pressure (MPa)		stress	Axial strain	Lateral strain
0	0	0	0		0	0	0
201	0.002	0	0.0001		0.00103093	0	0.00201207
401	0.036	0.0029	-0.0003		0.0185567	0.029	-0.00603622
601	0.016	0.0027	-0.0003		0.00824741	0.027	-0.00603622
801	0.038	0.0034	-0.0003		0.0195876	0.034	-0.00603622
1003	0.042	0.0052	-0.0005		0.0216494	0.052	-0.0100604
1203	0.042	0.0054	-0.0005		0.0216494	0.054	-0.0100604
1403	0.054	0.0074	-0.0007		0.027835	0.074	-0.0140845
1603	0.054	0.0079	-0.0006		0.027835	0.079	-0.0120724
1803	0.056	0.0086	-0.0007		0.0288659	0.086	-0.0140845
2003	0.062	0.0099	-0.0008		0.0319587	0.099	-0.0160966
2203	0.066	0.0113	-0.0008		0.0340205	0.113	-0.0160966
2403	0.068	0.0122	-0.0009		0.0350515	0.122	-0.0181087
2603	0.07	0.0131	-0.0009		0.0360824	0.131	-0.0181087
2803	0.074	0.0137	-0.001		0.0381442	0.137	-0.0201207
3003	0.078	0.0148	-0.001		0.0402061	0.148	-0.0201207
3203	0.08	0.0159	-0.0011		0.041237	0.159	-0.0221328
3403	0.086	0.017	-0.0011		0.0443298	0.17	-0.0221328
3603	0.088	0.0179	-0.0011		0.0453607	0.179	-0.0221328
3803	0.09	0.019	-0.0012		0.0463917	0.19	-0.0241449
4003	0.094	0.02	-0.0013		0.0484535	0.2	-0.0261569
4203	0.096	0.0211	-0.0013		0.0494844	0.211	-0.0261569
4403	0.1	0.0221	-0.0013		0.0515463	0.221	-0.0261569
4603	0.102	0.023	-0.0013		0.0525772	0.23	-0.0261569
4803	0.108	0.0241	-0.0015		0.05567	0.241	-0.0301811
5003	0.11	0.0251	-0.0015		0.0567009	0.251	-0.0301811
5203	0.112	0.0262	-0.0015		0.0577318	0.262	-0.0301811
5403	0.112	0.0271	-0.0016		0.0577318	0.271	-0.0321932
5603	0.118	0.028	-0.0016		0.0608246	0.28	-0.0321932
5803	0.118	0.0291	-0.0015		0.0608246	0.291	-0.0301811
6003	0.12	0.0301	-0.0017		0.0618555	0.301	-0.0342052
6203	0.124	0.0311	-0.0016		0.0639174	0.311	-0.0321932
6403	0.128	0.0322	-0.0017		0.0659792	0.322	-0.0342052
6603	0.13	0.0333	-0.0017		0.0670102	0.333	-0.0342052
6803	0.134	0.0341	-0.0018		0.069072	0.341	-0.0362173
7003	0.136	0.0352	-0.0018		0.0701029	0.352	-0.0362173
7203	0.138	0.036	-0.0018		0.0711339	0.36	-0.0362173
7403	0.142	0.0371	-0.002		0.0731957	0.371	-0.0402414
7603	0.146	0.0381	-0.0019		0.0752576	0.381	-0.0382294
7803	0.148	0.0391	-0.0019		0.0762885	0.391	-0.0382294
8003	0.152	0.0401	-0.0019		0.0783503	0.401	-0.0382294
8203	0.154	0.0412	-0.002		0.0793813	0.412	-0.0402414
8403	0.158	0.0421	-0.0019		0.0814431	0.421	-0.0382294
8603	0.16	0.0431	-0.002		0.0824741	0.431	-0.0402414
8803	0.164	0.0441	-0.0021		0.0845359	0.441	-0.0422535
9003	0.168	0.0451	-0.0022		0.0865978	0.451	-0.0442656
9203	0.172	0.046	-0.0022		0.0886596	0.46	-0.0442656
9403	0.174	0.0472	-0.0021		0.0896905	0.472	-0.0422535
9603	0.174	0.0482	-0.0021		0.0896905	0.482	-0.0422535
9803	0.178	0.0492	-0.0021		0.0917524	0.492	-0.0422535
10003	0.186	0.0503	-0.0021		0.0958761	0.503	-0.0422535
10203	0.186	0.0512	-0.0019		0.0958761	0.512	-0.0382294
10403	0.186	0.0521	-0.002		0.0958761	0.521	-0.0402414
10603	0.19	0.0531	-0.002		0.0979379	0.531	-0.0402414
10803	0.192	0.0542	-0.0019		0.0989689	0.542	-0.0382294
11003	0.198	0.0551	-0.0021		0.102062	0.551	-0.0422535
11203	0.198	0.056	-0.0021		0.102062	0.56	-0.0422535
11403	0.202	0.057	-0.0022		0.104123	0.57	-0.0442656
11603	0.202	0.0581	-0.0024		0.104123	0.581	-0.0482897
11803	0.206	0.0592	-0.0022		0.106185	0.592	-0.0442656
12003	0.208	0.0601	-0.0022		0.107216	0.601	-0.0442656
12203	0.212	0.0611	-0.0023		0.109278	0.611	-0.0462777
12403	0.212	0.0621	-0.0022		0.109278	0.621	-0.0442656
12603	0.218	0.0631	-0.0021		0.112371	0.631	-0.0422535
12803	0.22	0.0641	-0.0021		0.113402	0.641	-0.0422535
13003	0.224	0.0652	-0.0021		0.115464	0.652	-0.0422535
13203	0.226	0.0663	-0.0021		0.116495	0.663	-0.0422535
13403	0.23	0.0673	-0.0021		0.118556	0.673	-0.0422535
13603	0.232	0.0682	-0.0022		0.119587	0.682	-0.0442656
13803	0.234	0.0692	-0.0021		0.120618	0.692	-0.0422535
14003	0.24	0.0703	-0.0022		0.123711	0.703	-0.0442656
14203	0.24	0.0712	-0.0022		0.123711	0.712	-0.0442656
14403	0.244	0.0722	-0.0024		0.125773	0.722	-0.0482897
14603	0.248	0.0732	-0.0022		0.127835	0.732	-0.0442656
14803	0.25	0.0742	-0.0022		0.128866	0.742	-0.0442656
15003	0.256	0.0751	-0.0023		0.131958	0.751	-0.0462777
15203	0.256	0.0762	-0.0023		0.131958	0.762	-0.0462777
15403	0.258	0.0772	-0.0023		0.132989	0.772	-0.0462777
15603	0.262	0.078	-0.0023		0.135051	0.78	-0.0462777
15803	0.266	0.0792	-0.0024		0.137113	0.792	-0.0482897
16003	0.268	0.08	-0.0023		0.138144	0.8	-0.0462777
16203	0.27	0.0812	-0.0024		0.139175	0.812	-0.0482897
16403	0.274	0.082	-0.0024		0.141237	0.82	-0.0482897
16603	0.274	0.0832	-0.0024		0.141237	0.832	-0.0482897
16803	0.28	0.0843	-0.0024		0.14433	0.843	-0.0482897
17003	0.284	0.0853	-0.0024		0.146391	0.853	-0.0482897
17203	0.286	0.0861	-0.0024		0.147422	0.861	-0.0482897
17403	0.288	0.0869	-0.0024		0.148453	0.869	-0.0482897
17603	0.286	0.088	-0.0024		0.147422	0.88	-0.0482897
17803	0.296	0.0889	-0.0025		0.152577	0.889	-0.0503018
18003	0.296	0.09	-0.0024		0.152577	0.9	-0.0482897
18203	0.3	0.091	-0.0023		0.154639	0.91	-0.0462777
18403	0.302	0.0921	-0.0024		0.15567	0.921	-0.0482897
18603	0.306	0.0931	-0.0024		0.157732	0.931	-0.0482897
18803	0.308	0.094	-0.0024		0.158763	0.94	-0.0482897
19003	0.312	0.095	-0.0024		0.160824	0.95	-0.0482897
19203	0.316	0.0961	-0.0025		0.162886	0.961	-0.0503018
19403	0.316	0.0971	-0.0024		0.162886	0.971	-0.0482897
19603	0.322	0.0981	-0.0025		0.165979	0.981	-0.0503018
19803	0.326	0.0993	-0.0025		0.168041	0.993	-0.0503018
20003	0.328	0.1002	-0.0024		0.169072	1.002	-0.0482897
20203	0.332	0.1012	-0.0024		0.171134	1.012	-0.0482897
20403	0.334	0.1022	-0.0025		0.172165	1.022	-0.0503018
20603	0.334	0.1031	-0.0024		0.172165	1.031	-0.0482897
20803	0.34	0.104	-0.0025		0.175257	1.04	-0.0503018
21003	0.34	0.1051	-0.0024		0.175257	1.051	-0.0482897
21203	0.342	0.1061	-0.0024		0.176288	1.061	-0.0482897
21403	0.35	0.1073	-0.0023		0.180412	1.073	-0.0462777
21603	0.35	0.1083	-0.0024		0.180412	1.083	-0.0482897
21803	0.354	0.1091	-0.0024		0.182474	1.091	-0.0482897
22003	0.356	0.1101	-0.0024		0.183505	1.101	-0.0482897
22203	0.36	0.1111	-0.0025		0.185567	1.111	-0.0503018
22403	0.362	0.112	-0.0025		0.186598	1.12	-0.0503018
22603	0.368	0.1131	-0.0025		0.18969	1.131	-0.0503018
22803	0.37	0.114	-0.0025		0.190721	1.14	-0.0503018
23003	0.372	0.115	-0.0025		0.191752	1.15	-0.0503018
23203	0.376	0.1161	-0.0024		0.193814	1.161	-0.0482897
23403	0.378	0.1171	-0.0024		0.194845	1.171	-0.0482897
23603	0.384	0.1181	-0.0024		0.197938	1.181	-0.0482897
23803	0.386	0.119	-0.0025		0.198969	1.19	-0.0503018
24003	0.386	0.1201	-0.0025		0.198969	1.201	-0.0503018
24203	0.39	0.121	-0.0025		0.20103	1.21	-0.0503018
24403	0.394	0.1221	-0.0025		0.203092	1.221	-0.0503018
24603	0.396	0.1229	-0.0024		0.204123	1.229	-0.0482897
24803	0.402	0.1241	-0.0024		0.207216	1.241	-0.0482897
25003	0.402	0.1252	-0.0023		0.207216	1.252	-0.0462777
25203	0.404	0.1262	-0.0023		0.208247	1.262	-0.0462777
25403	0.41	0.1271	-0.0023		0.21134	1.271	-0.0462777
25603	0.414	0.1282	-0.0022		0.213402	1.282	-0.0442656
25803	0.414	0.1292	-0.0022		0.213402	1.292	-0.0442656
26003	0.416	0.1301	-0.0022		0.214433	1.301	-0.0442656
26203	0.42	0.1312	-0.0021		0.216494	1.312	-0.0422535
26403	0.422	0.1322	-0.0021		0.217525	1.322	-0.0422535
26603	0.428	0.1333	-0.0021		0.220618	1.333	-0.0422535
26803	0.432	0.134	-0.0021		0.22268	1.34	-0.0422535
27003	0.434	0.135	-0.0021		0.223711	1.35	-0.0422535
27203	0.436	0.1362	-0.0021		0.224742	1.362	-0.0422535
27403	0.44	0.1371	-0.0021		0.226804	1.371	-0.0422535
27603	0.444	0.1382	-0.0021		0.228865	1.382	-0.0422535
27803	0.446	0.139	-0.0022		0.229896	1.39	-0.0442656
28003	0.448	0.1401	-0.0023		0.230927	1.401	-0.0462777
28203	0.452	0.1412	-0.0022		0.232989	1.412	-0.0442656
28403	0.454	0.1422	-0.0021		0.23402	1.422	-0.0422535
28603	0.458	0.1431	-0.0022		0.236082	1.431	-0.0442656
28803	0.464	0.1441	-0.0022		0.239175	1.441	-0.0442656
29003	0.464	0.1451	-0.0022		0.239175	1.451	-0.0442656
29203	0.468	0.1461	-0.0022		0.241237	1.461	-0.0442656
29403	0.472	0.1471	-0.0023		0.243298	1.471	-0.0462777
29603	0.474	0.1481	-0.0022		0.244329	1.481	-0.0442656
29803	0.476	0.1491	-0.0023		0.24536	1.491	-0.0462777
30003	0.482	0.1501	-0.0024		0.248453	1.501	-0.0482897
30203	0.486	0.1511	-0.0024		0.250515	1.511	-0.0482897
30403	0.488	0.1521	-0.0022		0.251546	1.521	-0.0442656
30603	0.492	0.153	-0.0022		0.253608	1.53	-0.0442656
30803	0.496	0.1541	-0.0022		0.25567	1.541	-0.0442656
31003	0.5	0.1551	-0.0022		0.257731	1.551	-0.0442656
31203	0.502	0.1561	-0.0022		0.258762	1.561	-0.0442656
31403	0.508	0.157	-0.0022		0.261855	1.57	-0.0442656
31603	0.51	0.1581	-0.0022		0.262886	1.581	-0.0442656
31803	0.512	0.1591	-0.0022		0.263917	1.591	-0.0442656
32003	0.512	0.1601	-0.0022		0.263917	1.601	-0.0442656
32203	0.52	0.1611	-0.0022		0.268041	1.611	-0.0442656
32403	0.522	0.1621	-0.0022		0.269072	1.621	-0.0442656
32603	0.526	0.163	-0.0021		0.271133	1.63	-0.0422535
32803	0.528	0.164	-0.0022		0.272164	1.64	-0.0442656
33003	0.532	0.1651	-0.0021		0.274226	1.651	-0.0422535
33203	0.534	0.166	-0.0022		0.275257	1.66	-0.0442656
33403	0.542	0.167	-0.0023		0.279381	1.67	-0.0462777
33603	0.546	0.1681	-0.0021		0.281443	1.681	-0.0422535
33803	0.546	0.1691	-0.0022		0.281443	1.691	-0.0442656
34003	0.55	0.17	-0.0022		0.283505	1.7	-0.0442656
34203	0.554	0.1712	-0.0023		0.285566	1.712	-0.0462777
34403	0.558	0.172	-0.0022		0.287628	1.72	-0.0442656
34603	0.56	0.1729	-0.0023		0.288659	1.729	-0.0462777
34803	0.564	0.174	-0.0023		0.290721	1.74	-0.0462777
35003	0.566	0.1749	-0.0023		0.291752	1.749	-0.0462777
35203	0.572	0.176	-0.0023		0.294845	1.76	-0.0462777
35403	0.576	0.1771	-0.0022		0.296907	1.771	-0.0442656
35603	0.578	0.178	-0.0023		0.297938	1.78	-0.0462777
35803	0.582	0.1789	-0.0023		0.299999	1.789	-0.0462777
36003	0.586	0.1799	-0.0022		0.302061	1.799	-0.0442656
36203	0.592	0.1809	-0.0023		0.305154	1.809	-0.0462777
36403	0.596	0.182	-0.0024		0.307216	1.82	-0.0482897
36603	0.602	0.1829	-0.0023		0.310309	1.829	-0.0462777
36803	0.602	0.1841	-0.0023		0.310309	1.841	-0.0462777
37003	0.608	0.185	-0.0023		0.313401	1.85	-0.0462777
37203	0.612	0.1862	-0.0022		0.315463	1.862	-0.0442656
37403	0.616	0.1871	-0.0023		0.317525	1.871	-0.0462777
37603	0.62	0.188	-0.0024		0.319587	1.88	-0.0482897
37803	0.622	0.1891	-0.0023		0.320618	1.891	-0.0462777
38003	0.626	0.1899	-0.0023		0.32268	1.899	-0.0462777
38203	0.632	0.191	-0.0023		0.325772	1.91	-0.0462777
38403	0.632	0.1921	-0.0023		0.325772	1.921	-0.0462777
38603	0.636	0.1931	-0.0023		0.327834	1.931	-0.0462777
38803	0.64	0.1941	-0.0023		0.329896	1.941	-0.0462777
39003	0.646	0.1952	-0.0023		0.332989	1.952	-0.0462777
39203	0.648	0.1962	-0.0025		0.33402	1.962	-0.0503018
39403	0.652	0.1972	-0.0023		0.336082	1.972	-0.0462777
39603	0.658	0.1982	-0.0023		0.339175	1.982	-0.0462777
39803	0.664	0.1994	-0.0023		0.342267	1.994	-0.0462777
40003	0.664	0.2002	-0.0023		0.342267	2.002	-0.0462777
40203	0.668	0.2012	-0.0025		0.344329	2.012	-0.0503018
40403	0.672	0.2021	-0.0023		0.346391	2.021	-0.0462777
40603	0.678	0.2032	-0.0023		0.349484	2.032	-0.0462777
40803	0.684	0.2041	-0.0023		0.352577	2.041	-0.0462777
41003	0.686	0.2052	-0.0023		0.353607	2.052	-0.0462777
41203	0.694	0.206	-0.0025		0.357731	2.06	-0.0503018
41403	0.696	0.2071	-0.0025		0.358762	2.071	-0.0503018
41603	0.702	0.2081	-0.0025		0.361855	2.081	-0.0503018
41803	0.702	0.209	-0.0023		0.361855	2.09	-0.0462777
42003	0.706	0.2101	-0.0024		0.363917	2.101	-0.0482897
42203	0.71	0.2111	-0.0025		0.365979	2.111	-0.0503018
42403	0.714	0.212	-0.0025		0.36804	2.12	-0.0503018
42603	0.72	0.213	-0.0025		0.371133	2.13	-0.0503018
42803	0.722	0.2141	-0.0024		0.372164	2.141	-0.0482897
43003	0.726	0.2151	-0.0024		0.374226	2.151	-0.0482897
43203	0.73	0.2162	-0.0023		0.376288	2.162	-0.0462777
43403	0.734	0.2171	-0.0024		0.37835	2.171	-0.0482897
43603	0.74	0.2181	-0.0024		0.381442	2.181	-0.0482897
43803	0.744	0.2191	-0.0025		0.383504	2.191	-0.0503018
44003	0.75	0.2201	-0.0025		0.386597	2.201	-0.0503018
44203	0.754	0.221	-0.0025		0.388659	2.21	-0.0503018
44403	0.758	0.2219	-0.0023		0.390721	2.219	-0.0462777
44603	0.762	0.2229	-0.0024		0.392783	2.229	-0.0482897
44803	0.768	0.2242	-0.0025		0.395875	2.242	-0.0503018
45003	0.77	0.2251	-0.0026		0.396906	2.251	-0.0523139
45203	0.776	0.2261	-0.0025		0.399999	2.261	-0.0503018
45403	0.782	0.2273	-0.0024		0.403092	2.273	-0.0482897
45603	0.786	0.228	-0.0024		0.405154	2.28	-0.0482897
45803	0.79	0.2291	-0.0024		0.407216	2.291	-0.0482897
46003	0.79	0.23	-0.0024		0.407216	2.3	-0.0482897
46203	0.796	0.231	-0.0024		0.410308	2.31	-0.0482897
46403	0.802	0.2318	-0.0024		0.413401	2.318	-0.0482897
46603	0.802	0.2327	-0.0024		0.413401	2.327	-0.0482897
46803	0.81	0.234	-0.0025		0.417525	2.34	-0.0503018
47003	0.818	0.2349	-0.0024		0.421649	2.349	-0.0482897
47203	0.818	0.236	-0.0025		0.421649	2.36	-0.0503018
47403	0.826	0.237	-0.0025		0.425772	2.37	-0.0503018
47603	0.828	0.2379	-0.0024		0.426803	2.379	-0.0482897
47803	0.834	0.2389	-0.0025		0.429896	2.389	-0.0503018
48003	0.838	0.24	-0.0025		0.431958	2.4	-0.0503018
48203	0.844	0.241	-0.0025		0.435051	2.41	-0.0503018
48403	0.85	0.242	-0.0025		0.438143	2.42	-0.0503018
48603	0.854	0.243	-0.0024		0.440205	2.43	-0.0482897
48803	0.858	0.2441	-0.0025		0.442267	2.441	-0.0503018
49003	0.864	0.2451	-0.0027		0.44536	2.451	-0.054326
49203	0.87	0.2461	-0.0027		0.448453	2.461	-0.054326
49403	0.872	0.2471	-0.0027		0.449484	2.471	-0.054326
49603	0.88	0.2481	-0.0027		0.453607	2.481	-0.054326
49803	0.88	0.2491	-0.0027		0.453607	2.491	-0.054326
50003	0.888	0.2501	-0.0027		0.457731	2.501	-0.054326
50203	0.888	0.2511	-0.0027		0.457731	2.511	-0.054326
50403	0.894	0.2521	-0.0028		0.460824	2.521	-0.056338
50603	0.898	0.253	-0.0027		0.462886	2.53	-0.054326
50803	0.904	0.2541	-0.0027		0.465978	2.541	-0.054326
51003	0.908	0.2551	-0.0026		0.46804	2.551	-0.0523139
51203	0.914	0.2561	-0.0026		0.471133	2.561	-0.0523139
51403	0.916	0.2569	-0.0026		0.472164	2.569	-0.0523139
51603	0.924	0.2581	-0.0027		0.476288	2.581	-0.054326
51803	0.928	0.2591	-0.0026		0.478349	2.591	-0.0523139
52003	0.932	0.2602	-0.0027		0.480411	2.602	-0.054326
52203	0.938	0.2611	-0.0027		0.483504	2.611	-0.054326
52403	0.942	0.262	-0.0026		0.485566	2.62	-0.0523139
52603	0.946	0.2631	-0.0026		0.487628	2.631	-0.0523139
52803	0.95	0.2641	-0.0027		0.48969	2.641	-0.054326
53003	0.958	0.265	-0.0027		0.493813	2.65	-0.054326
53203	0.962	0.266	-0.0028		0.495875	2.66	-0.056338
53403	0.966	0.2671	-0.0027		0.497937	2.671	-0.054326
53603	0.972	0.268	-0.0028		0.50103	2.68	-0.056338
53803	0.978	0.269	-0.0029		0.504123	2.69	-0.0583501
54003	0.984	0.27	-0.0027		0.507215	2.7	-0.054326
54203	0.988	0.2709	-0.0027		0.509277	2.709	-0.054326
54403	0.99	0.2719	-0.0028		0.510308	2.719	-0.056338
54603	0.996	0.2728	-0.0028		0.513401	2.728	-0.056338
54803	1.002	0.274	-0.0027		0.516494	2.74	-0.054326
55003	1.008	0.2749	-0.0028		0.519587	2.749	-0.056338
55203	1.014	0.2758	-0.0028		0.522679	2.758	-0.056338
55403	1.018	0.2766	-0.0027		0.524741	2.766	-0.054326
55603	1.022	0.2776	-0.0027		0.526803	2.776	-0.054326
55803	1.028	0.2788	-0.0029		0.529896	2.788	-0.0583501
56003	1.036	0.2798	-0.0028		0.534019	2.798	-0.056338
56203	1.038	0.2809	-0.0028		0.53505	2.809	-0.056338
56403	1.044	0.2818	-0.0029		0.538143	2.818	-0.0583501
56603	1.052	0.2829	-0.0028		0.542267	2.829	-0.056338
56803	1.054	0.2839	-0.0028		0.543298	2.839	-0.056338
57003	1.06	0.2847	-0.0027		0.546391	2.847	-0.054326
57203	1.066	0.2857	-0.0028		0.549483	2.857	-0.056338
57403	1.072	0.2868	-0.0029		0.552576	2.868	-0.0583501
57603	1.076	0.2878	-0.0028		0.554638	2.878	-0.056338
57803	1.082	0.2889	-0.0028		0.557731	2.889	-0.056338
58003	1.084	0.29	-0.0029		0.558762	2.9	-0.0583501
58203	1.068	0.2907	-0.0028		0.550514	2.907	-0.056338
58403	1.076	0.2918	-0.0028		0.554638	2.918	-0.056338
58603	1.086	0.293	-0.0028		0.559793	2.93	-0.056338
58803	1.096	0.2939	-0.0029		0.564947	2.939	-0.0583501
59003	1.1	0.2951	-0.003		0.567009	2.951	-0.0603622
59203	1.108	0.2961	-0.003		0.571133	2.961	-0.0603622
59403	1.114	0.2971	-0.0031		0.574226	2.971	-0.0623742
59603	1.122	0.2981	-0.0032		0.578349	2.981	-0.0643863
59803	1.126	0.2991	-0.0032		0.580411	2.991	-0.0643863
60003	1.13	0.3002	-0.0031		0.582473	3.002	-0.0623742
60203	1.134	0.301	-0.0033		0.584535	3.01	-0.0663984
60403	1.14	0.3019	-0.0032		0.587628	3.019	-0.0643863
60603	1.146	0.3029	-0.0032		0.59072	3.029	-0.0643863
60803	1.154	0.3039	-0.0033		0.594844	3.039	-0.0663984
61003	1.16	0.3051	-0.0032		0.597937	3.051	-0.0643863
61203	1.166	0.306	-0.0033		0.60103	3.06	-0.0663984
61403	1.17	0.307	-0.0033		0.603091	3.07	-0.0663984
61603	1.176	0.308	-0.0032		0.606184	3.08	-0.0643863
61803	1.182	0.3089	-0.0033		0.609277	3.089	-0.0663984
62003	1.188	0.31	-0.0034		0.61237	3.1	-0.0684105
62203	1.194	0.311	-0.0033		0.615463	3.11	-0.0663984
62403	1.2	0.312	-0.0034		0.618555	3.12	-0.0684105
62603	1.204	0.313	-0.0034		0.620617	3.13	-0.0684105
62803	1.214	0.314	-0.0034		0.625772	3.14	-0.0684105
63003	1.22	0.3151	-0.0036		0.628865	3.151	-0.0724346
63203	1.224	0.316	-0.0036		0.630926	3.16	-0.0724346
63403	1.23	0.3171	-0.0035		0.634019	3.171	-0.0704225
63603	1.24	0.318	-0.0037		0.639174	3.18	-0.0744467
63803	1.242	0.319	-0.0037		0.640205	3.19	-0.0744467
64003	1.246	0.3202	-0.0037		0.642267	3.202	-0.0744467
64203	1.254	0.3211	-0.0038		0.64639	3.211	-0.0764588
64403	1.258	0.3221	-0.0038		0.648452	3.221	-0.0764588
64603	1.264	0.323	-0.0038		0.651545	3.23	-0.0764588
64803	1.27	0.3238	-0.0039		0.654638	3.238	-0.0784708
65003	1.278	0.325	-0.004		0.658761	3.25	-0.0804829
65203	1.284	0.3259	-0.004		0.661854	3.259	-0.0804829
65403	1.29	0.327	-0.004		0.664947	3.27	-0.0804829
65603	1.294	0.3281	-0.004		0.667009	3.281	-0.0804829
65803	1.3	0.329	-0.0042		0.670102	3.29	-0.084507
66003	1.308	0.33	-0.0042		0.674225	3.3	-0.084507
66203	1.314	0.331	-0.0043		0.677318	3.31	-0.0865191
66403	1.318	0.3319	-0.0043		0.67938	3.319	-0.0865191
66603	1.324	0.333	-0.0042		0.682473	3.33	-0.084507
66803	1.332	0.3339	-0.0043		0.686596	3.339	-0.0865191
67003	1.338	0.335	-0.0043		0.689689	3.35	-0.0865191
67203	1.344	0.3359	-0.0044		0.692782	3.359	-0.0885312
67403	1.352	0.3369	-0.0044		0.696906	3.369	-0.0885312
67603	1.356	0.3379	-0.0044		0.698968	3.379	-0.0885312
67803	1.362	0.3388	-0.0045		0.70206	3.388	-0.0905433
68003	1.37	0.3398	-0.0046		0.706184	3.398	-0.0925553
68203	1.374	0.3408	-0.0045		0.708246	3.408	-0.0905433
68403	1.382	0.3418	-0.0047		0.71237	3.418	-0.0945674
68603	1.388	0.3429	-0.0047		0.715462	3.429	-0.0945674
68803	1.392	0.3438	-0.0047		0.717524	3.438	-0.0945674
69003	1.398	0.3446	-0.0049		0.720617	3.446	-0.0985915
69203	1.408	0.3458	-0.0049		0.725772	3.458	-0.0985915
69403	1.414	0.3467	-0.005		0.728864	3.467	-0.100604
69603	1.42	0.3478	-0.0049		0.731957	3.478	-0.0985915
69803	1.424	0.3489	-0.005		0.734019	3.489	-0.100604
70003	1.432	0.3499	-0.0051		0.738143	3.499	-0.102616
70203	1.438	0.3509	-0.0051		0.741236	3.509	-0.102616
70403	1.446	0.3519	-0.0052		0.745359	3.519	-0.104628
70603	1.452	0.3529	-0.0051		0.748452	3.529	-0.102616
70803	1.46	0.3539	-0.0053		0.752576	3.539	-0.10664
71003	1.466	0.355	-0.0053		0.755668	3.55	-0.10664
71203	1.47	0.3558	-0.0054		0.75773	3.558	-0.108652
71403	1.478	0.3568	-0.0056		0.761854	3.568	-0.112676
71603	1.484	0.3578	-0.0054		0.764947	3.578	-0.108652
71803	1.49	0.3588	-0.0055		0.76804	3.588	-0.110664
72003	1.496	0.3597	-0.0056		0.771132	3.597	-0.112676
72203	1.504	0.3607	-0.0056		0.775256	3.607	-0.112676
72403	1.512	0.3618	-0.0057		0.77938	3.618	-0.114688
72603	1.516	0.3628	-0.0058		0.781442	3.628	-0.1167
72803	1.524	0.3637	-0.006		0.785565	3.637	-0.120724
73003	1.532	0.3647	-0.0061		0.789689	3.647	-0.122736
73203	1.54	0.3658	-0.0062		0.793813	3.658	-0.124748
73403	1.544	0.3668	-0.0061		0.795875	3.668	-0.122736
73603	1.55	0.3677	-0.006		0.798967	3.677	-0.120724
73803	1.562	0.3688	-0.0063		0.805153	3.688	-0.126761
74003	1.568	0.3698	-0.0063		0.808246	3.698	-0.126761
74203	1.574	0.3707	-0.0062		0.811338	3.707	-0.124748
74403	1.582	0.3718	-0.0062		0.815462	3.718	-0.124748
74603	1.584	0.3727	-0.0063		0.816493	3.727	-0.126761
74803	1.594	0.3737	-0.0063		0.821648	3.737	-0.126761
75003	1.6	0.3746	-0.0064		0.824741	3.746	-0.128773
75203	1.608	0.3757	-0.0065		0.828864	3.757	-0.130785
75403	1.614	0.3767	-0.0066		0.831957	3.767	-0.132797
75603	1.622	0.3777	-0.0068		0.836081	3.777	-0.136821
75803	1.63	0.3787	-0.0068		0.840204	3.787	-0.136821
76003	1.638	0.3797	-0.0068		0.844328	3.797	-0.136821
76203	1.644	0.3806	-0.0069		0.847421	3.806	-0.138833
76403	1.652	0.3817	-0.007		0.851545	3.817	-0.140845
76603	1.66	0.3827	-0.007		0.855668	3.827	-0.140845
76803	1.666	0.3837	-0.0071		0.858761	3.837	-0.142857
77003	1.674	0.3848	-0.0069		0.862885	3.848	-0.138833
77203	1.682	0.3858	-0.0069		0.867008	3.858	-0.138833
77403	1.69	0.3868	-0.007		0.871132	3.868	-0.140845
77603	1.694	0.3879	-0.007		0.873194	3.879	-0.140845
77803	1.706	0.3889	-0.0071		0.87938	3.889	-0.142857
78003	1.712	0.3899	-0.0072		0.882472	3.899	-0.144869
78203	1.72	0.3906	-0.0072		0.886596	3.906	-0.144869
78403	1.728	0.3917	-0.0074		0.89072	3.917	-0.148893
78603	1.73	0.3927	-0.0075		0.891751	3.927	-0.150905
78803	1.742	0.3938	-0.0075		0.897936	3.938	-0.150905
79003	1.746	0.3947	-0.0076		0.899998	3.947	-0.152918
79203	1.754	0.3958	-0.0075		0.904122	3.958	-0.150905
79403	1.762	0.3968	-0.0074		0.908245	3.968	-0.148893
79603	1.772	0.3979	-0.0077		0.9134	3.979	-0.15493
79803	1.78	0.3989	-0.0077		0.917524	3.989	-0.15493
80003	1.786	0.3999	-0.0078		0.920617	3.999	-0.156942
80203	1.79	0.4009	-0.0078		0.922678	4.009	-0.156942
80403	1.796	0.4019	-0.0077		0.925771	4.019	-0.15493
80603	1.798	0.4027	-0.0077		0.926802	4.027	-0.15493
80803	1.806	0.4039	-0.0076		0.930926	4.039	-0.152918
81003	1.814	0.4049	-0.0077		0.93505	4.049	-0.15493
81203	1.822	0.4058	-0.0076		0.939173	4.058	-0.152918
81403	1.83	0.4069	-0.0077		0.943297	4.069	-0.15493
81603	1.84	0.4079	-0.0078		0.948452	4.079	-0.156942
81803	1.846	0.4089	-0.0077		0.951544	4.089	-0.15493
82003	1.854	0.4098	-0.0077		0.955668	4.098	-0.15493
82203	1.86	0.4107	-0.0077		0.958761	4.107	-0.15493
82403	1.87	0.4117	-0.0078		0.963915	4.117	-0.156942
82603	1.876	0.4127	-0.0076		0.967008	4.127	-0.152918
82803	1.886	0.4137	-0.0079		0.972163	4.137	-0.158954
83003	1.892	0.4147	-0.0078		0.975256	4.147	-0.156942
83203	1.9	0.4156	-0.0079		0.979379	4.156	-0.158954
83403	1.91	0.4168	-0.0081		0.984534	4.168	-0.162978
83603	1.918	0.4178	-0.0081		0.988658	4.178	-0.162978
83803	1.926	0.4188	-0.0082		0.992781	4.188	-0.16499
84003	1.934	0.4199	-0.0082		0.996905	4.199	-0.16499
84203	1.94	0.4209	-0.0083		0.999998	4.209	-0.167002
84403	1.948	0.4219	-0.0083		1.00412	4.219	-0.167002
84603	1.956	0.4228	-0.0084		1.00825	4.228	-0.169014
84803	1.962	0.4238	-0.0085		1.01134	4.238	-0.171026
85003	1.974	0.4246	-0.0084		1.01752	4.246	-0.169014
85203	1.98	0.4258	-0.0084		1.02062	4.258	-0.169014
85403	1.988	0.4268	-0.0084		1.02474	4.268	-0.169014
85603	1.998	0.4277	-0.0087		1.02989	4.277	-0.17505
85803	2.006	0.4288	-0.0086		1.03402	4.288	-0.173038
86003	2.014	0.4299	-0.0086		1.03814	4.299	-0.173038
86203	2.02	0.4308	-0.0086		1.04123	4.308	-0.173038
86403	2.028	0.4318	-0.0087		1.04536	4.318	-0.17505
86603	2.038	0.4327	-0.0089		1.05051	4.327	-0.179074
86803	2.046	0.4338	-0.0088		1.05464	4.338	-0.177062
87003	2.054	0.4348	-0.0089		1.05876	4.348	-0.179074
87203	2.062	0.4357	-0.0089		1.06288	4.357	-0.179074
87403	2.072	0.4366	-0.0091		1.06804	4.366	-0.183099
87603	2.08	0.4379	-0.0091		1.07216	4.379	-0.183099
87803	2.086	0.4389	-0.0092		1.07526	4.389	-0.185111
88003	2.094	0.4399	-0.0092		1.07938	4.399	-0.185111
88203	2.102	0.4408	-0.0093		1.0835	4.408	-0.187123
88403	2.11	0.4419	-0.0093		1.08763	4.419	-0.187123
88603	2.118	0.4428	-0.0094		1.09175	4.428	-0.189135
88803	2.124	0.444	-0.0095		1.09484	4.44	-0.191147
89003	2.128	0.445	-0.0095		1.0969	4.45	-0.191147
89203	2.134	0.4459	-0.0095		1.1	4.459	-0.191147
89403	2.14	0.4469	-0.0094		1.10309	4.469	-0.189135
89603	2.146	0.4478	-0.0095		1.10618	4.478	-0.191147
89803	2.154	0.449	-0.0096		1.11031	4.49	-0.193159
90003	2.154	0.4501	-0.0094		1.11031	4.501	-0.189135
90203	2.158	0.4511	-0.0094		1.11237	4.511	-0.189135
90403	2.166	0.4522	-0.0094		1.11649	4.522	-0.189135
90603	2.168	0.453	-0.0094		1.11752	4.53	-0.189135
90803	2.172	0.4539	-0.0095		1.11959	4.539	-0.191147
91003	2.182	0.4549	-0.0095		1.12474	4.549	-0.191147
91203	2.188	0.4558	-0.0095		1.12783	4.558	-0.191147
91403	2.198	0.4569	-0.0096		1.13299	4.569	-0.193159
91603	2.208	0.4578	-0.0096		1.13814	4.578	-0.193159
91803	2.214	0.4587	-0.0097		1.14123	4.587	-0.195171
92003	2.226	0.4598	-0.0098		1.14742	4.598	-0.197183
92203	2.236	0.4607	-0.0099		1.15257	4.607	-0.199195
92403	2.242	0.4616	-0.01		1.15567	4.616	-0.201207
92603	2.252	0.4628	-0.0101		1.16082	4.628	-0.203219
92803	2.262	0.4636	-0.0101		1.16598	4.636	-0.203219
93003	2.274	0.4647	-0.0102		1.17216	4.647	-0.205231
93203	2.28	0.4657	-0.0104		1.17526	4.657	-0.209256
93403	2.29	0.4667	-0.0105		1.18041	4.667	-0.211268
93603	2.3	0.4679	-0.0106		1.18556	4.679	-0.21328
93803	2.308	0.4686	-0.0107		1.18969	4.686	-0.215292
94003	2.318	0.4696	-0.0107		1.19484	4.696	-0.215292
94203	2.326	0.4707	-0.0108		1.19897	4.707	-0.217304
94403	2.338	0.4717	-0.011		1.20515	4.717	-0.221328
94603	2.344	0.4727	-0.0109		1.20824	4.727	-0.219316
94803	2.354	0.4736	-0.011		1.2134	4.736	-0.221328
95003	2.364	0.4747	-0.0111		1.21855	4.747	-0.22334
95203	2.374	0.4756	-0.0112		1.22371	4.756	-0.225352
95403	2.386	0.4768	-0.0112		1.22989	4.768	-0.225352
95603	2.396	0.4779	-0.0114		1.23505	4.779	-0.229376
95803	2.406	0.4789	-0.0114		1.2402	4.789	-0.229376
96003	2.414	0.4798	-0.0116		1.24433	4.798	-0.2334
96203	2.424	0.4809	-0.0115		1.24948	4.809	-0.231388
96403	2.434	0.4819	-0.0116		1.25464	4.819	-0.2334
96603	2.442	0.4829	-0.0117		1.25876	4.829	-0.235412
96803	2.45	0.4838	-0.0116		1.26288	4.838	-0.2334
97003	2.46	0.4847	-0.0117		1.26804	4.847	-0.235412
97203	2.468	0.4856	-0.0119		1.27216	4.856	-0.239437
97403	2.484	0.4869	-0.012		1.28041	4.869	-0.241449
97603	2.488	0.4877	-0.0119		1.28247	4.877	-0.239437
97803	2.498	0.4887	-0.0119		1.28763	4.887	-0.239437
98003	2.508	0.4896	-0.0118		1.29278	4.896	-0.237425
98203	2.518	0.4906	-0.012		1.29794	4.906	-0.241449
98403	2.53	0.4917	-0.0121		1.30412	4.917	-0.243461
98603	2.538	0.4927	-0.0121		1.30824	4.927	-0.243461
98803	2.548	0.4938	-0.0122		1.3134	4.938	-0.245473
99003	2.556	0.4949	-0.0122		1.31752	4.949	-0.245473
99203	2.568	0.4958	-0.0122		1.32371	4.958	-0.245473
99403	2.576	0.4967	-0.0124		1.32783	4.967	-0.249497
99603	2.59	0.4977	-0.0127		1.33505	4.977	-0.255533
99803	2.596	0.4987	-0.0126		1.33814	4.987	-0.253521
100003	2.604	0.4999	-0.0125		1.34227	4.999	-0.251509
100203	2.616	0.5007	-0.0127		1.34845	5.007	-0.255533
100403	2.628	0.502	-0.0126		1.35464	5.02	-0.253521
100603	2.636	0.5027	-0.0127		1.35876	5.027	-0.255533
100803	2.648	0.5038	-0.0129		1.36495	5.038	-0.259557
101003	2.654	0.5047	-0.0129		1.36804	5.047	-0.259557
101203	2.664	0.5057	-0.0129		1.37319	5.057	-0.259557
101403	2.674	0.5068	-0.0129		1.37835	5.068	-0.259557
101603	2.682	0.5078	-0.0129		1.38247	5.078	-0.259557
101803	2.692	0.5088	-0.013		1.38763	5.088	-0.261569
102003	2.7	0.5097	-0.0131		1.39175	5.097	-0.263581
102203	2.71	0.5106	-0.0131		1.3969	5.106	-0.263581
102403	2.722	0.5117	-0.0131		1.40309	5.117	-0.263581
102603	2.734	0.5128	-0.0132		1.40928	5.128	-0.265594
102803	2.742	0.5137	-0.0133		1.4134	5.137	-0.267606
103003	2.75	0.5148	-0.0133		1.41752	5.148	-0.267606
103203	2.76	0.5156	-0.0133		1.42268	5.156	-0.267606
103403	2.77	0.5167	-0.0133		1.42783	5.167	-0.267606
103603	2.778	0.5177	-0.0137		1.43196	5.177	-0.275654
103803	2.79	0.5187	-0.0134		1.43814	5.187	-0.269618
104003	2.798	0.5197	-0.0133		1.44226	5.197	-0.267606
104203	2.81	0.5207	-0.0133		1.44845	5.207	-0.267606
104403	2.818	0.5215	-0.0134		1.45257	5.215	-0.269618
104603	2.828	0.5227	-0.0134		1.45773	5.227	-0.269618
104803	2.84	0.5236	-0.0135		1.46391	5.236	-0.27163
105003	2.848	0.5247	-0.0137		1.46804	5.247	-0.275654
105203	2.86	0.5256	-0.0136		1.47422	5.256	-0.273642
105403	2.872	0.5267	-0.0136		1.48041	5.267	-0.273642
105603	2.884	0.5275	-0.0136		1.48659	5.275	-0.273642
105803	2.892	0.5287	-0.0136		1.49072	5.287	-0.273642
106003	2.902	0.5296	-0.0137		1.49587	5.296	-0.275654
106203	2.912	0.5306	-0.0137		1.50103	5.306	-0.275654
106403	2.924	0.5316	-0.0138		1.50721	5.316	-0.277666
106603	2.936	0.5327	-0.014		1.5134	5.327	-0.28169
106803	2.944	0.5336	-0.014		1.51752	5.336	-0.28169
107003	2.954	0.5346	-0.0141		1.52268	5.346	-0.283702
107203	2.966	0.5356	-0.0142		1.52886	5.356	-0.285714
107403	2.978	0.5366	-0.0143		1.53505	5.366	-0.287726
107603	2.99	0.5376	-0.0144		1.54123	5.376	-0.289738
107803	2.998	0.5385	-0.0144		1.54536	5.385	-0.289738
108003	3.01	0.5395	-0.0143		1.55154	5.395	-0.287726
108203	3.02	0.5406	-0.0144		1.5567	5.406	-0.289738
108403	3.034	0.5416	-0.0144		1.56391	5.416	-0.289738
108603	3.046	0.5427	-0.0145		1.5701	5.427	-0.291751
108803	3.054	0.5437	-0.0147		1.57422	5.437	-0.295775
109003	3.066	0.5447	-0.0147		1.58041	5.447	-0.295775
109203	3.078	0.5456	-0.0148		1.58659	5.456	-0.297787
109403	3.088	0.5467	-0.0148		1.59175	5.467	-0.297787
109603	3.1	0.5476	-0.0149		1.59793	5.476	-0.299799
109803	3.11	0.5486	-0.0149		1.60309	5.486	-0.299799
110003	3.12	0.5496	-0.015		1.60824	5.496	-0.301811
110203	3.134	0.5504	-0.0151		1.61546	5.504	-0.303823
110403	3.146	0.5515	-0.0151		1.62165	5.515	-0.303823
110603	3.158	0.5525	-0.0152		1.62783	5.525	-0.305835
110803	3.168	0.5536	-0.0154		1.63299	5.536	-0.309859
111003	3.178	0.5546	-0.0153		1.63814	5.546	-0.307847
111203	3.196	0.5556	-0.0152		1.64742	5.556	-0.305835
111403	3.204	0.5565	-0.0153		1.65154	5.565	-0.307847
111603	3.218	0.5576	-0.0154		1.65876	5.576	-0.309859
111803	3.228	0.5587	-0.0155		1.66391	5.587	-0.311871
112003	3.24	0.5596	-0.0156		1.6701	5.596	-0.313883
112203	3.248	0.5606	-0.0154		1.67422	5.606	-0.309859
112403	3.26	0.5616	-0.0155		1.68041	5.616	-0.311871
112603	3.272	0.5626	-0.0156		1.68659	5.626	-0.313883
112803	3.284	0.5637	-0.0157		1.69278	5.637	-0.315895
113003	3.296	0.5646	-0.0158		1.69897	5.646	-0.317907
113203	3.308	0.5656	-0.0159		1.70515	5.656	-0.31992
113403	3.32	0.5666	-0.0159		1.71134	5.666	-0.31992
113603	3.332	0.5676	-0.0161		1.71752	5.676	-0.323944
113803	3.344	0.5686	-0.0161		1.72371	5.686	-0.323944
114003	3.352	0.5696	-0.0161		1.72783	5.696	-0.323944
114203	3.366	0.5705	-0.0162		1.73505	5.705	-0.325956
114403	3.378	0.5717	-0.0162		1.74123	5.717	-0.325956
114603	3.39	0.5725	-0.0163		1.74742	5.725	-0.327968
114803	3.404	0.5736	-0.0164		1.75464	5.736	-0.32998
115003	3.412	0.5747	-0.0163		1.75876	5.747	-0.327968
115203	3.424	0.5755	-0.0164		1.76494	5.755	-0.32998
115403	3.436	0.5766	-0.0165		1.77113	5.766	-0.331992
115603	3.448	0.5776	-0.0166		1.77732	5.776	-0.334004
115803	3.462	0.5786	-0.0166		1.78453	5.786	-0.334004
116003	3.472	0.5796	-0.0167		1.78969	5.796	-0.336016
116203	3.482	0.5805	-0.0168		1.79484	5.805	-0.338028
116403	3.494	0.5815	-0.0169		1.80103	5.815	-0.34004
116603	3.506	0.5826	-0.0171		1.80721	5.826	-0.344064
116803	3.52	0.5835	-0.0174		1.81443	5.835	-0.350101
117003	3.528	0.5846	-0.0175		1.81855	5.846	-0.352113
117203	3.542	0.5856	-0.0175		1.82577	5.856	-0.352113
117403	3.554	0.5865	-0.0175		1.83195	5.865	-0.352113
117603	3.566	0.5875	-0.0176		1.83814	5.875	-0.354125
117803	3.576	0.5886	-0.0177		1.8433	5.886	-0.356137
118003	3.588	0.5896	-0.0177		1.84948	5.896	-0.356137
118203	3.602	0.5906	-0.0177		1.8567	5.906	-0.356137
118403	3.608	0.5916	-0.0178		1.85979	5.916	-0.358149
118603	3.624	0.5926	-0.0178		1.86804	5.926	-0.358149
118803	3.636	0.5935	-0.0179		1.87422	5.935	-0.360161
119003	3.648	0.5946	-0.0179		1.88041	5.946	-0.360161
119203	3.66	0.5955	-0.0181		1.88659	5.955	-0.364185
119403	3.67	0.5964	-0.018		1.89175	5.964	-0.362173
119603	3.688	0.5977	-0.018		1.90103	5.977	-0.362173
119803	3.7	0.5987	-0.0181		1.90721	5.987	-0.364185
120003	3.712	0.5996	-0.0181		1.9134	5.996	-0.364185
120203	3.72	0.6006	-0.0182		1.91752	6.006	-0.366197
120403	3.734	0.6016	-0.0182		1.92474	6.016	-0.366197
120603	3.746	0.6025	-0.0183		1.93092	6.025	-0.368209
120803	3.76	0.6035	-0.0182		1.93814	6.035	-0.366197
121003	3.774	0.6046	-0.0182		1.94536	6.046	-0.366197
121203	3.792	0.6056	-0.0183		1.95463	6.056	-0.368209
121403	3.802	0.6066	-0.0183		1.95979	6.066	-0.368209
121603	3.814	0.6075	-0.0183		1.96598	6.075	-0.368209
121803	3.828	0.6086	-0.0186		1.97319	6.086	-0.374245
122003	3.84	0.6097	-0.0185		1.97938	6.097	-0.372233
122203	3.852	0.6105	-0.0185		1.98556	6.105	-0.372233
122403	3.864	0.6115	-0.0186		1.99175	6.115	-0.374245
122603	3.876	0.6124	-0.0187		1.99793	6.124	-0.376258
122803	3.886	0.6134	-0.0188		2.00309	6.134	-0.37827
123003	3.9	0.6145	-0.0188		2.0103	6.145	-0.37827
123203	3.916	0.6155	-0.0186		2.01855	6.155	-0.374245
123403	3.93	0.6165	-0.0186		2.02577	6.165	-0.374245
123603	3.944	0.6177	-0.0187		2.03299	6.177	-0.376258
123803	3.96	0.6185	-0.0188		2.04123	6.185	-0.37827
124003	3.972	0.6196	-0.0189		2.04742	6.196	-0.380282
124203	3.984	0.6205	-0.019		2.0536	6.205	-0.382294
124403	3.994	0.6215	-0.019		2.05876	6.215	-0.382294
124603	4.01	0.6226	-0.0191		2.06701	6.226	-0.384306
124803	4.024	0.6236	-0.0193		2.07422	6.236	-0.38833
125003	4.036	0.6246	-0.0194		2.08041	6.246	-0.390342
125203	4.05	0.6256	-0.0193		2.08762	6.256	-0.38833
125403	4.066	0.6266	-0.0193		2.09587	6.266	-0.38833
125603	4.078	0.6276	-0.0192		2.10206	6.276	-0.386318
125803	4.09	0.6286	-0.0192		2.10824	6.286	-0.386318
126003	4.104	0.6294	-0.0193		2.11546	6.294	-0.38833
126203	4.12	0.6305	-0.0193		2.12371	6.305	-0.38833
126403	4.134	0.6315	-0.0193		2.13092	6.315	-0.38833
126603	4.146	0.6324	-0.0194		2.13711	6.324	-0.390342
126803	4.16	0.6334	-0.0194		2.14433	6.334	-0.390342
127003	4.176	0.6345	-0.0195		2.15257	6.345	-0.392354
127203	4.192	0.6355	-0.0196		2.16082	6.355	-0.394366
127403	4.202	0.6364	-0.0196		2.16597	6.364	-0.394366
127603	4.218	0.6375	-0.0196		2.17422	6.375	-0.394366
127803	4.23	0.6384	-0.0196		2.18041	6.384	-0.394366
128003	4.244	0.6394	-0.0197		2.18762	6.394	-0.396378
128203	4.258	0.6405	-0.0198		2.19484	6.405	-0.39839
128403	4.272	0.6413	-0.0198		2.20206	6.413	-0.39839
128603	4.288	0.6424	-0.0197		2.2103	6.424	-0.396378
128803	4.302	0.6435	-0.0195		2.21752	6.435	-0.392354
129003	4.316	0.6444	-0.0195		2.22474	6.444	-0.392354
129203	4.328	0.6454	-0.0195		2.23092	6.454	-0.392354
129403	4.344	0.6464	-0.0196		2.23917	6.464	-0.394366
129603	4.36	0.6474	-0.0197		2.24742	6.474	-0.396378
129803	4.374	0.6484	-0.0198		2.25463	6.484	-0.39839
130003	4.384	0.6493	-0.0198		2.25979	6.493	-0.39839
130203	4.404	0.6506	-0.02		2.2701	6.506	-0.402414
130403	4.42	0.6516	-0.02		2.27835	6.516	-0.402414
130603	4.43	0.6526	-0.0201		2.2835	6.526	-0.404427
130803	4.438	0.6535	-0.0204		2.28762	6.535	-0.410463
131003	4.454	0.6546	-0.0204		2.29587	6.546	-0.410463
131203	4.47	0.6555	-0.0204		2.30412	6.555	-0.410463
131403	4.484	0.6565	-0.0205		2.31134	6.565	-0.412475
131603	4.5	0.6576	-0.0205		2.31958	6.576	-0.412475
131803	4.514	0.6586	-0.0206		2.3268	6.586	-0.414487
132003	4.53	0.6595	-0.0207		2.33505	6.595	-0.416499
132203	4.544	0.6606	-0.0206		2.34226	6.606	-0.414487
132403	4.558	0.6616	-0.0206		2.34948	6.616	-0.414487
132603	4.572	0.6626	-0.0208		2.3567	6.626	-0.418511
132803	4.588	0.6635	-0.0208		2.36494	6.635	-0.418511
133003	4.602	0.6645	-0.021		2.37216	6.645	-0.422535
133203	4.614	0.6654	-0.0211		2.37835	6.654	-0.424547
133403	4.63	0.6665	-0.0212		2.38659	6.665	-0.426559
133603	4.648	0.6676	-0.0213		2.39587	6.676	-0.428571
133803	4.662	0.6684	-0.0214		2.40309	6.684	-0.430584
134003	4.676	0.6694	-0.0214		2.4103	6.694	-0.430584
134203	4.692	0.6704	-0.0215		2.41855	6.704	-0.432596
134403	4.712	0.6715	-0.0215		2.42886	6.715	-0.432596
134603	4.724	0.6725	-0.0215		2.43505	6.725	-0.432596
134803	4.74	0.6734	-0.0215		2.44329	6.734	-0.432596
135003	4.754	0.6747	-0.0215		2.45051	6.747	-0.432596
135203	4.77	0.6754	-0.0218		2.45876	6.754	-0.438632
135403	4.784	0.6764	-0.0217		2.46597	6.764	-0.43662
135603	4.798	0.6774	-0.0216		2.47319	6.774	-0.434608
135803	4.812	0.6783	-0.0217		2.48041	6.783	-0.43662
136003	4.828	0.6795	-0.0218		2.48865	6.795	-0.438632
136203	4.844	0.6803	-0.0217		2.4969	6.803	-0.43662
136403	4.86	0.6813	-0.0218		2.50515	6.813	-0.438632
136603	4.872	0.6823	-0.0218		2.51133	6.823	-0.438632
136803	4.89	0.6834	-0.0218		2.52061	6.834	-0.438632
137003	4.904	0.6844	-0.022		2.52783	6.844	-0.442656
137203	4.918	0.6854	-0.0219		2.53505	6.854	-0.440644
137403	4.934	0.6865	-0.0219		2.54329	6.865	-0.440644
137603	4.95	0.6874	-0.022		2.55154	6.874	-0.442656
137803	4.964	0.6884	-0.022		2.55876	6.884	-0.442656
138003	4.984	0.6894	-0.022		2.56907	6.894	-0.442656
138203	4.994	0.6902	-0.0221		2.57422	6.902	-0.444668
138403	5.012	0.6912	-0.0221		2.5835	6.912	-0.444668
138603	5.028	0.6923	-0.0221		2.59175	6.923	-0.444668
138803	5.046	0.6934	-0.0221		2.60103	6.934	-0.444668
139003	5.058	0.6945	-0.0222		2.60721	6.945	-0.44668
139203	5.074	0.6954	-0.0222		2.61546	6.954	-0.44668
139403	5.09	0.6963	-0.0222		2.62371	6.963	-0.44668
139603	5.104	0.6975	-0.0222		2.63092	6.975	-0.44668
139803	5.122	0.6984	-0.0222		2.6402	6.984	-0.44668
140003	5.138	0.6995	-0.0222		2.64845	6.995	-0.44668
140203	5.15	0.7004	-0.0223		2.65463	7.004	-0.448692
140403	5.166	0.7014	-0.0223		2.66288	7.014	-0.448692
140603	5.182	0.7023	-0.0224		2.67113	7.023	-0.450704
140803	5.198	0.7033	-0.0225		2.67938	7.033	-0.452716
141003	5.216	0.7043	-0.0224		2.68865	7.043	-0.450704
141203	5.234	0.7052	-0.0224		2.69793	7.052	-0.450704
141403	5.246	0.7064	-0.0225		2.70412	7.064	-0.452716
141603	5.262	0.7073	-0.0224		2.71237	7.073	-0.450704
141803	5.28	0.7084	-0.0225		2.72164	7.084	-0.452716
142003	5.3	0.7094	-0.0225		2.73195	7.094	-0.452716
142203	5.316	0.7102	-0.0225		2.7402	7.102	-0.452716
142403	5.33	0.7113	-0.0225		2.74742	7.113	-0.452716
142603	5.346	0.7124	-0.0227		2.75566	7.124	-0.45674
142803	5.362	0.7133	-0.0227		2.76391	7.133	-0.45674
143003	5.376	0.7143	-0.0228		2.77113	7.143	-0.458753
143203	5.394	0.7154	-0.0228		2.78041	7.154	-0.458753
143403	5.408	0.7163	-0.0227		2.78762	7.163	-0.45674
143603	5.424	0.7172	-0.0227		2.79587	7.172	-0.45674
143803	5.44	0.7183	-0.0226		2.80412	7.183	-0.454728
144003	5.456	0.7192	-0.0226		2.81237	7.192	-0.454728
144203	5.474	0.7203	-0.0227		2.82164	7.203	-0.45674
144403	5.484	0.7214	-0.0226		2.8268	7.214	-0.454728
144603	5.5	0.7222	-0.0226		2.83505	7.222	-0.454728
144803	5.514	0.7233	-0.0228		2.84226	7.233	-0.458753
145003	5.53	0.7242	-0.0227		2.85051	7.242	-0.45674
145203	5.546	0.7253	-0.0227		2.85876	7.253	-0.45674
145403	5.562	0.7263	-0.0227		2.867	7.263	-0.45674
145603	5.578	0.7272	-0.0227		2.87525	7.272	-0.45674
145803	5.596	0.7282	-0.0227		2.88453	7.282	-0.45674
146003	5.612	0.7292	-0.0229		2.89278	7.292	-0.460765
146203	5.63	0.7301	-0.0228		2.90206	7.301	-0.458753
146403	5.65	0.7312	-0.0227		2.91236	7.312	-0.45674
146603	5.67	0.7324	-0.0228		2.92267	7.324	-0.458753
146803	5.682	0.7334	-0.0226		2.92886	7.334	-0.454728
147003	5.702	0.7343	-0.0227		2.93917	7.343	-0.45674
147203	5.714	0.7354	-0.0228		2.94535	7.354	-0.458753
147403	5.734	0.7363	-0.0229		2.95566	7.363	-0.460765
147603	5.748	0.7373	-0.0227		2.96288	7.373	-0.45674
147803	5.766	0.7383	-0.0228		2.97216	7.383	-0.458753
148003	5.78	0.7393	-0.0229		2.97938	7.393	-0.460765
148203	5.798	0.7402	-0.0229		2.98865	7.402	-0.460765
148403	5.818	0.7413	-0.0228		2.99896	7.413	-0.458753
148603	5.834	0.7422	-0.0228		3.00721	7.422	-0.458753
148803	5.856	0.7433	-0.0228		3.01855	7.433	-0.458753
149003	5.874	0.7443	-0.0229		3.02783	7.443	-0.460765
149203	5.89	0.7453	-0.0216		3.03608	7.453	-0.434608
149403	5.906	0.7463	-0.0216		3.04432	7.463	-0.434608
149603	5.922	0.7473	-0.0216		3.05257	7.473	-0.434608
149803	5.944	0.7483	-0.0217		3.06391	7.483	-0.43662
150003	5.962	0.7493	-0.0215		3.07319	7.493	-0.432596
150203	5.98	0.7505	-0.0215		3.08247	7.505	-0.432596
150403	5.996	0.7513	-0.0226		3.09072	7.513	-0.454728
150603	6.01	0.7523	-0.0222		3.09793	7.523	-0.44668
150803	6.034	0.7533	-0.0222		3.1103	7.533	-0.44668
151003	6.048	0.7543	-0.0221		3.11752	7.543	-0.444668
151203	6.066	0.7553	-0.0227		3.1268	7.553	-0.45674
151403	6.086	0.7563	-0.0212		3.13711	7.563	-0.426559
151603	6.104	0.7573	-0.0212		3.14639	7.573	-0.426559
151803	6.122	0.7585	-0.0214		3.15566	7.585	-0.430584
152003	6.14	0.7594	-0.0214		3.16494	7.594	-0.430584
152203	6.158	0.7605	-0.0216		3.17422	7.605	-0.434608
152403	6.176	0.7614	-0.0217		3.1835	7.614	-0.43662
152603	6.196	0.7623	-0.0207		3.19381	7.623	-0.416499
152803	6.212	0.7633	-0.0213		3.20206	7.633	-0.428571
153003	6.232	0.7645	-0.0211		3.21236	7.645	-0.424547
153203	6.25	0.7652	-0.0211		3.22164	7.652	-0.424547
153403	6.27	0.7664	-0.0207		3.23195	7.664	-0.416499
153603	6.286	0.7673	-0.0206		3.2402	7.673	-0.414487
153803	6.306	0.7682	-0.0205		3.25051	7.682	-0.412475
154003	6.322	0.7693	-0.0206		3.25876	7.693	-0.414487
154203	6.342	0.7704	-0.0224		3.26907	7.704	-0.450704
154403	6.36	0.7714	-0.0208		3.27834	7.714	-0.418511
154603	6.38	0.7723	-0.0207		3.28865	7.723	-0.416499
154803	6.398	0.7735	-0.0206		3.29793	7.735	-0.414487
155003	6.416	0.7743	-0.0207		3.30721	7.743	-0.416499
155203	6.432	0.7753	-0.0206		3.31546	7.753	-0.414487
155403	6.45	0.7763	-0.0206		3.32474	7.763	-0.414487
155603	6.47	0.7773	-0.0209		3.33504	7.773	-0.420523
155803	6.484	0.7781	-0.0207		3.34226	7.781	-0.416499
156003	6.502	0.7792	-0.0206		3.35154	7.792	-0.414487
156203	6.524	0.7802	-0.0206		3.36288	7.802	-0.414487
156403	6.542	0.7812	-0.0205		3.37216	7.812	-0.412475
156603	6.558	0.7823	-0.0207		3.38041	7.823	-0.416499
156803	6.58	0.7833	-0.0211		3.39175	7.833	-0.424547
157003	6.6	0.7842	-0.0209		3.40205	7.842	-0.420523
157203	6.622	0.7853	-0.0211		3.41339	7.853	-0.424547
157403	6.64	0.7864	-0.0237		3.42267	7.864	-0.476861
157603	6.658	0.7874	-0.0207		3.43195	7.874	-0.416499
157803	6.678	0.7883	-0.0206		3.44226	7.883	-0.414487
158003	6.7	0.7894	-0.0207		3.4536	7.894	-0.416499
158203	6.716	0.7904	-0.0207		3.46185	7.904	-0.416499
158403	6.732	0.7915	-0.0208		3.4701	7.915	-0.418511
158603	6.754	0.7924	-0.0211		3.48144	7.924	-0.424547
158803	6.77	0.7935	-0.0216		3.48968	7.935	-0.434608
159003	6.788	0.7945	-0.0219		3.49896	7.945	-0.440644
159203	6.806	0.7954	-0.0221		3.50824	7.954	-0.444668
159403	6.824	0.7963	-0.0222		3.51752	7.963	-0.44668
159603	6.844	0.7974	-0.0223		3.52783	7.974	-0.448692
159803	6.862	0.7983	-0.0226		3.53711	7.983	-0.454728
160003	6.882	0.7992	-0.023		3.54742	7.992	-0.462777
160203	6.906	0.8004	-0.0229		3.55979	8.004	-0.460765
160403	6.922	0.8014	-0.0228		3.56803	8.014	-0.458753
160603	6.936	0.8023	-0.0228		3.57525	8.023	-0.458753
160803	6.956	0.8033	-0.0226		3.58556	8.033	-0.454728
161003	6.974	0.8043	-0.0222		3.59484	8.043	-0.44668
161203	6.994	0.8052	-0.0218		3.60515	8.052	-0.438632
161403	7.014	0.8062	-0.021		3.61546	8.062	-0.422535
161603	7.03	0.8073	-0.0208		3.6237	8.073	-0.418511
161803	7.048	0.8082	-0.0206		3.63298	8.082	-0.414487
162003	7.072	0.8092	-0.0207		3.64535	8.092	-0.416499
162203	7.088	0.8103	-0.0207		3.6536	8.103	-0.416499
162403	7.106	0.8113	-0.0206		3.66288	8.113	-0.414487
162603	7.122	0.8123	-0.0213		3.67113	8.123	-0.428571
162803	7.14	0.8133	-0.0222		3.6804	8.133	-0.44668
163003	7.16	0.8141	-0.0208		3.69071	8.141	-0.418511
163203	7.182	0.8153	-0.0214		3.70205	8.153	-0.430584
163403	7.204	0.8162	-0.0208		3.71339	8.162	-0.418511
163603	7.218	0.8172	-0.0207		3.72061	8.172	-0.416499
163803	7.236	0.8182	-0.021		3.72989	8.182	-0.422535
164003	7.252	0.8193	-0.0233		3.73814	8.193	-0.468813
164203	7.272	0.8203	-0.0235		3.74845	8.203	-0.472837
164403	7.292	0.8212	-0.0208		3.75875	8.212	-0.418511
164603	7.31	0.8222	-0.0207		3.76803	8.222	-0.416499
164803	7.332	0.8232	-0.0208		3.77937	8.232	-0.418511
165003	7.346	0.8243	-0.0221		3.78659	8.243	-0.444668
165203	7.364	0.8253	-0.0236		3.79587	8.253	-0.474849
165403	7.384	0.8262	-0.0235		3.80618	8.262	-0.472837
165603	7.4	0.8272	-0.0208		3.81442	8.272	-0.418511
165803	7.418	0.8282	-0.0208		3.8237	8.282	-0.418511
166003	7.438	0.8292	-0.0207		3.83401	8.292	-0.416499
166203	7.46	0.8301	-0.0207		3.84535	8.301	-0.416499
166403	7.48	0.8312	-0.0206		3.85566	8.312	-0.414487
166603	7.5	0.832	-0.0206		3.86597	8.32	-0.414487
166803	7.518	0.8331	-0.0207		3.87525	8.331	-0.416499
167003	7.54	0.834	-0.0207		3.88659	8.34	-0.416499
167203	7.558	0.8351	-0.021		3.89587	8.351	-0.422535
167403	7.578	0.836	-0.021		3.90618	8.36	-0.422535
167603	7.596	0.8371	-0.0214		3.91546	8.371	-0.430584
167803	7.616	0.838	-0.0212		3.92576	8.38	-0.426559
168003	7.632	0.839	-0.0208		3.93401	8.39	-0.418511
168203	7.654	0.84	-0.0209		3.94535	8.4	-0.420523
168403	7.672	0.8411	-0.0208		3.95463	8.411	-0.418511
168603	7.7	0.8421	-0.0219		3.96906	8.421	-0.440644
168803	7.718	0.8432	-0.0209		3.97834	8.432	-0.420523
169003	7.738	0.8443	-0.0208		3.98865	8.443	-0.418511
169203	7.758	0.8452	-0.0207		3.99896	8.452	-0.416499
169403	7.778	0.8462	-0.0235		4.00927	8.462	-0.472837
169603	7.798	0.8472	-0.0234		4.01958	8.472	-0.470825
169803	7.814	0.848	-0.0209		4.02783	8.48	-0.420523
170003	7.832	0.8491	-0.0207		4.0371	8.491	-0.416499
170203	7.852	0.8502	-0.0207		4.04741	8.502	-0.416499
170403	7.87	0.8512	-0.0207		4.05669	8.512	-0.416499
170603	7.892	0.8521	-0.0209		4.06803	8.521	-0.420523
170803	7.91	0.8531	-0.0223		4.07731	8.531	-0.448692
171003	7.93	0.8541	-0.0236		4.08762	8.541	-0.474849
171203	7.948	0.8551	-0.0207		4.0969	8.551	-0.416499
171403	7.97	0.8561	-0.0207		4.10824	8.561	-0.416499
171603	7.988	0.8571	-0.0206		4.11752	8.571	-0.414487
171803	8.006	0.8581	-0.0206		4.1268	8.581	-0.414487
172003	8.03	0.8591	-0.0207		4.13917	8.591	-0.416499
172203	8.048	0.8601	-0.021		4.14844	8.601	-0.422535
172403	8.068	0.8611	-0.0234		4.15875	8.611	-0.470825
172603	8.086	0.8621	-0.0237		4.16803	8.621	-0.476861
172803	8.104	0.8631	-0.0237		4.17731	8.631	-0.476861
173003	8.124	0.8642	-0.0234		4.18762	8.642	-0.470825
173203	8.146	0.865	-0.0208		4.19896	8.65	-0.418511
173403	8.162	0.8661	-0.0208		4.20721	8.661	-0.418511
173603	8.184	0.8672	-0.0208		4.21855	8.672	-0.418511
173803	8.206	0.8683	-0.021		4.22989	8.683	-0.422535
174003	8.22	0.8691	-0.0238		4.2371	8.691	-0.478873
174203	8.24	0.87	-0.0236		4.24741	8.7	-0.474849
174403	8.26	0.871	-0.0208		4.25772	8.71	-0.418511
174603	8.278	0.872	-0.0208		4.267	8.72	-0.418511
174803	8.302	0.8731	-0.0207		4.27937	8.731	-0.416499
175003	8.324	0.874	-0.021		4.29071	8.74	-0.422535
175203	8.344	0.8752	-0.0209		4.30102	8.752	-0.420523
175403	8.362	0.8761	-0.0207		4.3103	8.761	-0.416499
175603	8.386	0.8771	-0.0213		4.32267	8.771	-0.428571
175803	8.406	0.8782	-0.0207		4.33298	8.782	-0.416499
176003	8.42	0.8792	-0.0208		4.3402	8.792	-0.418511
176203	8.438	0.88	-0.0207		4.34948	8.8	-0.416499
176403	8.46	0.8811	-0.0207		4.36082	8.811	-0.416499
176603	8.482	0.8822	-0.0207		4.37216	8.822	-0.416499
176803	8.504	0.8832	-0.0207		4.3835	8.832	-0.416499
177003	8.522	0.8841	-0.0207		4.39277	8.841	-0.416499
177203	8.544	0.885	-0.0207		4.40411	8.85	-0.416499
177403	8.564	0.8862	-0.0207		4.41442	8.862	-0.416499
177603	8.582	0.8871	-0.0207		4.4237	8.871	-0.416499
177803	8.604	0.8883	-0.0207		4.43504	8.883	-0.416499
178003	8.624	0.8891	-0.0207		4.44535	8.891	-0.416499
178203	8.642	0.8901	-0.0208		4.45463	8.901	-0.418511
178403	8.662	0.8911	-0.0206		4.46494	8.911	-0.414487
178603	8.686	0.8922	-0.0206		4.47731	8.922	-0.414487
178803	8.706	0.8931	-0.0207		4.48762	8.931	-0.416499
179003	8.726	0.8941	-0.0208		4.49793	8.941	-0.418511
179203	8.746	0.8951	-0.0207		4.50824	8.951	-0.416499
179403	8.766	0.8959	-0.0207		4.51855	8.959	-0.416499
179603	8.786	0.897	-0.0208		4.52886	8.97	-0.418511
179803	8.81	0.8979	-0.0208		4.54123	8.979	-0.418511
180003	8.83	0.8991	-0.0208		4.55154	8.991	-0.418511
180203	8.848	0.9	-0.0208		4.56081	9	-0.418511
180403	8.872	0.9011	-0.0207		4.57319	9.011	-0.416499
180603	8.894	0.902	-0.0207		4.58453	9.02	-0.416499
180803	8.914	0.903	-0.0207		4.59484	9.03	-0.416499
181003	8.934	0.904	-0.0208		4.60514	9.04	-0.418511
181203	8.954	0.905	-0.0207		4.61545	9.05	-0.416499
181403	8.972	0.906	-0.0208		4.62473	9.06	-0.418511
181603	8.994	0.9071	-0.0207		4.63607	9.071	-0.416499
181803	9.014	0.9081	-0.0207		4.64638	9.081	-0.416499
182003	9.034	0.9091	-0.0207		4.65669	9.091	-0.416499
182203	9.054	0.91	-0.0207		4.667	9.1	-0.416499
182403	9.076	0.9111	-0.0207		4.67834	9.111	-0.416499
182603	9.098	0.9121	-0.0207		4.68968	9.121	-0.416499
182803	9.122	0.9133	-0.0207		4.70205	9.133	-0.416499
183003	9.142	0.9142	-0.0207		4.71236	9.142	-0.416499
183203	9.16	0.9152	-0.0207		4.72164	9.152	-0.416499
183403	9.184	0.9161	-0.0207		4.73401	9.161	-0.416499
183603	9.204	0.9171	-0.0207		4.74432	9.171	-0.416499
183803	9.224	0.9182	-0.0207		4.75463	9.182	-0.416499
184003	9.242	0.919	-0.0207		4.76391	9.19	-0.416499
184203	9.264	0.92	-0.0207		4.77525	9.2	-0.416499
184403	9.288	0.9212	-0.0207		4.78762	9.212	-0.416499
184603	9.306	0.9221	-0.0207		4.7969	9.221	-0.416499
184803	9.33	0.9231	-0.0207		4.80927	9.231	-0.416499
185003	9.35	0.9242	-0.0207		4.81958	9.242	-0.416499
185203	9.37	0.925	-0.0207		4.82989	9.25	-0.416499
185403	9.39	0.926	-0.0208		4.8402	9.26	-0.418511
185603	9.414	0.927	-0.0207		4.85257	9.27	-0.416499
185803	9.434	0.928	-0.0207		4.86288	9.28	-0.416499
186003	9.456	0.929	-0.0207		4.87422	9.29	-0.416499
186203	9.478	0.9299	-0.0207		4.88556	9.299	-0.416499
186403	9.496	0.931	-0.0207		4.89483	9.31	-0.416499
186603	9.516	0.9321	-0.0207		4.90514	9.321	-0.416499
186803	9.536	0.933	-0.0206		4.91545	9.33	-0.414487
187003	9.556	0.9343	-0.0206		4.92576	9.343	-0.414487
187203	9.568	0.9351	-0.0206		4.93195	9.351	-0.414487
187403	9.59	0.9361	-0.0206		4.94329	9.361	-0.414487
187603	9.606	0.9371	-0.0205		4.95154	9.371	-0.412475
187803	9.626	0.9381	-0.0205		4.96185	9.381	-0.412475
188003	9.648	0.939	-0.0205		4.97319	9.39	-0.412475
188203	9.668	0.94	-0.0204		4.98349	9.4	-0.410463
188403	9.69	0.9411	-0.0204		4.99483	9.411	-0.410463
188603	9.714	0.9422	-0.0203		5.00721	9.422	-0.408451
188803	9.732	0.9432	-0.0201		5.01648	9.432	-0.404427
189003	9.748	0.9441	-0.0201		5.02473	9.441	-0.404427
189203	9.77	0.9451	-0.02		5.03607	9.451	-0.402414
189403	9.788	0.9461	-0.0199		5.04535	9.461	-0.400402
189603	9.804	0.9471	-0.0198		5.0536	9.471	-0.39839
189803	9.828	0.9481	-0.0197		5.06597	9.481	-0.396378
190003	9.848	0.9489	-0.0195		5.07628	9.489	-0.392354
190203	9.866	0.9501	-0.0193		5.08556	9.501	-0.38833
190403	9.884	0.9512	-0.0193		5.09483	9.512	-0.38833
190603	9.904	0.952	-0.0191		5.10514	9.52	-0.384306
190803	9.922	0.953	-0.0191		5.11442	9.53	-0.384306
191003	9.944	0.9541	-0.019		5.12576	9.541	-0.382294
191203	9.964	0.955	-0.0188		5.13607	9.55	-0.37827
191403	9.984	0.9561	-0.0187		5.14638	9.561	-0.376258
191603	10.002	0.957	-0.0186		5.15566	9.57	-0.374245
191803	10.024	0.9579	-0.0185		5.167	9.579	-0.372233
192003	10.046	0.9591	-0.0184		5.17834	9.591	-0.370221
192203	10.064	0.96	-0.0183		5.18762	9.6	-0.368209
192403	10.084	0.9611	-0.0181		5.19793	9.611	-0.364185
192603	10.106	0.9621	-0.0181		5.20927	9.621	-0.364185
192803	10.124	0.963	-0.018		5.21855	9.63	-0.362173
193003	10.138	0.9639	-0.0178		5.22576	9.639	-0.358149
193203	10.156	0.9652	-0.0177		5.23504	9.652	-0.356137
193403	10.168	0.9662	-0.0174		5.24123	9.662	-0.350101
193603	10.184	0.9672	-0.0171		5.24947	9.672	-0.344064
193803	10.2	0.9681	-0.0169		5.25772	9.681	-0.34004
194003	10.212	0.9691	-0.0167		5.26391	9.691	-0.336016
194203	10.23	0.9701	-0.0167		5.27318	9.701	-0.336016
194403	10.25	0.971	-0.0166		5.28349	9.71	-0.334004
194603	10.268	0.9719	-0.0164		5.29277	9.719	-0.32998
194803	10.29	0.973	-0.0164		5.30411	9.73	-0.32998
195003	10.31	0.9739	-0.0162		5.31442	9.739	-0.325956
195203	10.332	0.975	-0.0162		5.32576	9.75	-0.325956
195403	10.352	0.9759	-0.0161		5.33607	9.759	-0.323944
195603	10.374	0.9769	-0.0161		5.34741	9.769	-0.323944
195803	10.396	0.9781	-0.016		5.35875	9.781	-0.321932
196003	10.416	0.979	-0.0159		5.36906	9.79	-0.31992
196203	10.434	0.9799	-0.0158		5.37834	9.799	-0.317907
196403	10.458	0.981	-0.0158		5.39071	9.81	-0.317907
196603	10.48	0.9821	-0.0156		5.40205	9.821	-0.313883
196803	10.5	0.983	-0.0156		5.41236	9.83	-0.313883
197003	10.522	0.984	-0.0156		5.4237	9.84	-0.313883
197203	10.54	0.985	-0.0154		5.43298	9.85	-0.309859
197403	10.564	0.9859	-0.0154		5.44535	9.859	-0.309859
197603	10.586	0.987	-0.0154		5.45669	9.87	-0.309859
197803	10.614	0.9881	-0.0153		5.47112	9.881	-0.307847
198003	10.64	0.9891	-0.0152		5.48452	9.891	-0.305835
198203	10.658	0.99	-0.0152		5.4938	9.9	-0.305835
198403	10.686	0.9912	-0.015		5.50824	9.912	-0.301811
198603	10.706	0.9921	-0.015		5.51854	9.921	-0.301811
198803	10.724	0.9932	-0.0149		5.52782	9.932	-0.299799
199003	10.742	0.9942	-0.0148		5.5371	9.942	-0.297787
199203	10.764	0.9952	-0.0146		5.54844	9.952	-0.293763
199403	10.786	0.9961	-0.0145		5.55978	9.961	-0.291751
199603	10.808	0.9971	-0.0145		5.57112	9.971	-0.291751
199803	10.828	0.9981	-0.0144		5.58143	9.981	-0.289738
200003	10.85	0.9991	-0.0143		5.59277	9.991	-0.287726
200203	10.872	1	-0.0142		5.60411	10	-0.285714
200403	10.894	1.0012	-0.0141		5.61545	10.012	-0.283702
200603	10.91	1.0022	-0.014		5.6237	10.022	-0.28169
200803	10.93	1.0031	-0.014		5.63401	10.031	-0.28169
201003	10.948	1.004	-0.0139		5.64329	10.04	-0.279678
201203	10.97	1.0049	-0.0138		5.65463	10.049	-0.277666
201403	10.996	1.0061	-0.0137		5.66803	10.061	-0.275654
201603	11.014	1.0071	-0.0136		5.67731	10.071	-0.273642
201803	11.034	1.0079	-0.0136		5.68762	10.079	-0.273642
202003	11.058	1.009	-0.0135		5.69999	10.09	-0.27163
202203	11.08	1.0101	-0.0134		5.71133	10.101	-0.269618
202403	11.102	1.011	-0.0134		5.72267	10.11	-0.269618
202603	11.122	1.0121	-0.0134		5.73298	10.121	-0.269618
202803	11.148	1.0131	-0.0133		5.74638	10.131	-0.267606
203003	11.166	1.0141	-0.0133		5.75566	10.141	-0.267606
203203	11.19	1.0151	-0.0132		5.76803	10.151	-0.265594
203403	11.214	1.0161	-0.0131		5.7804	10.161	-0.263581
203603	11.232	1.017	-0.0131		5.78968	10.17	-0.263581
203803	11.256	1.0178	-0.013		5.80205	10.178	-0.261569
204003	11.28	1.019	-0.0129		5.81442	10.19	-0.259557
204203	11.306	1.02	-0.0128		5.82782	10.2	-0.257545
204403	11.322	1.021	-0.0129		5.83607	10.21	-0.259557
204603	11.346	1.0221	-0.0127		5.84844	10.221	-0.255533
204803	11.368	1.0231	-0.0127		5.85978	10.231	-0.255533
205003	11.388	1.024	-0.0126		5.87009	10.24	-0.253521
205203	11.412	1.025	-0.0127		5.88246	10.25	-0.255533
205403	11.432	1.0258	-0.0126		5.89277	10.258	-0.253521
205603	11.456	1.027	-0.0125		5.90514	10.27	-0.251509
205803	11.476	1.028	-0.0125		5.91545	10.28	-0.251509
206003	11.5	1.0289	-0.0123		5.92782	10.289	-0.247485
206203	11.522	1.03	-0.0123		5.93916	10.3	-0.247485
206403	11.544	1.031	-0.0123		5.9505	10.31	-0.247485
206603	11.566	1.032	-0.0123		5.96184	10.32	-0.247485
206803	11.588	1.0329	-0.0122		5.97318	10.329	-0.245473
207003	11.612	1.0341	-0.0121		5.98555	10.341	-0.243461
207203	11.632	1.0351	-0.0121		5.99586	10.351	-0.243461
207403	11.652	1.036	-0.012		6.00617	10.36	-0.241449
207603	11.674	1.037	-0.012		6.01751	10.37	-0.241449
207803	11.7	1.0381	-0.0119		6.03091	10.381	-0.239437
208003	11.722	1.039	-0.0119		6.04226	10.39	-0.239437
208203	11.746	1.0401	-0.0119		6.05463	10.401	-0.239437
208403	11.766	1.041	-0.0119		6.06494	10.41	-0.239437
208603	11.788	1.042	-0.0118		6.07628	10.42	-0.237425
208803	11.808	1.0429	-0.0118		6.08658	10.429	-0.237425
209003	11.832	1.044	-0.0118		6.09896	10.44	-0.237425
209203	11.854	1.045	-0.0117		6.1103	10.45	-0.235412
209403	11.878	1.0459	-0.0118		6.12267	10.459	-0.237425
209603	11.898	1.0469	-0.0116		6.13298	10.469	-0.2334
209803	11.924	1.0479	-0.0116		6.14638	10.479	-0.2334
210003	11.946	1.049	-0.0116		6.15772	10.49	-0.2334
210203	11.968	1.0499	-0.0116		6.16906	10.499	-0.2334
210403	11.99	1.0509	-0.0115		6.1804	10.509	-0.231388
210603	12.01	1.0519	-0.0115		6.19071	10.519	-0.231388
210803	12.034	1.0529	-0.0115		6.20308	10.529	-0.231388
211003	12.054	1.054	-0.0114		6.21339	10.54	-0.229376
211203	12.076	1.0549	-0.0116		6.22473	10.549	-0.2334
211403	12.098	1.0559	-0.0114		6.23607	10.559	-0.229376
211603	12.122	1.0569	-0.0115		6.24844	10.569	-0.231388
211803	12.146	1.058	-0.0113		6.26081	10.58	-0.227364
212003	12.17	1.059	-0.0112		6.27318	10.59	-0.225352
212203	12.19	1.0599	-0.0112		6.28349	10.599	-0.225352
212403	12.21	1.0609	-0.0111		6.2938	10.609	-0.22334
212603	12.232	1.0619	-0.0111		6.30514	10.619	-0.22334
212803	12.256	1.0629	-0.0112		6.31751	10.629	-0.225352
213003	12.276	1.0638	-0.011		6.32782	10.638	-0.221328
213203	12.304	1.0649	-0.0111		6.34225	10.649	-0.22334
213403	12.324	1.0657	-0.0111		6.35256	10.657	-0.22334
213603	12.354	1.0671	-0.0109		6.36803	10.671	-0.219316
213803	12.372	1.068	-0.0108		6.37731	10.68	-0.217304
214003	12.394	1.069	-0.0108		6.38865	10.69	-0.217304
214203	12.41	1.0701	-0.0108		6.39689	10.701	-0.217304
214403	12.434	1.071	-0.0107		6.40926	10.71	-0.215292
214603	12.452	1.072	-0.0107		6.41854	10.72	-0.215292
214803	12.474	1.073	-0.0107		6.42988	10.73	-0.215292
215003	12.494	1.0739	-0.0106		6.44019	10.739	-0.21328
215203	12.52	1.0748	-0.0106		6.45359	10.748	-0.21328
215403	12.544	1.0759	-0.0106		6.46597	10.759	-0.21328
215603	12.57	1.077	-0.0105		6.47937	10.77	-0.211268
215803	12.596	1.078	-0.0105		6.49277	10.78	-0.211268
216003	12.62	1.0791	-0.0106		6.50514	10.791	-0.21328
216203	12.638	1.0801	-0.0105		6.51442	10.801	-0.211268
216403	12.66	1.081	-0.0104		6.52576	10.81	-0.209256
216603	12.684	1.0819	-0.0105		6.53813	10.819	-0.211268
216803	12.704	1.083	-0.0104		6.54844	10.83	-0.209256
217003	12.726	1.084	-0.0104		6.55978	10.84	-0.209256
217203	12.746	1.085	-0.0103		6.57009	10.85	-0.207243
217403	12.764	1.086	-0.0103		6.57937	10.86	-0.207243
217603	12.788	1.0869	-0.0102		6.59174	10.869	-0.205231
217803	12.812	1.0879	-0.0102		6.60411	10.879	-0.205231
218003	12.83	1.0888	-0.0101		6.61339	10.888	-0.203219
218203	12.854	1.0898	-0.0101		6.62576	10.898	-0.203219
218403	12.876	1.0908	-0.01		6.6371	10.908	-0.201207
218603	12.898	1.0919	-0.0101		6.64844	10.919	-0.203219
218803	12.918	1.0929	-0.01		6.65875	10.929	-0.201207
219003	12.942	1.094	-0.0098		6.67112	10.94	-0.197183
219203	12.962	1.0949	-0.0098		6.68143	10.949	-0.197183
219403	12.986	1.0959	-0.0098		6.6938	10.959	-0.197183
219603	13.008	1.0969	-0.0099		6.70514	10.969	-0.199195
219803	13.03	1.0979	-0.0098		6.71648	10.979	-0.197183
220003	13.054	1.099	-0.0097		6.72885	10.99	-0.195171
220203	13.074	1.0999	-0.0097		6.73916	10.999	-0.195171
220403	13.092	1.1008	-0.0097		6.74844	11.008	-0.195171
220603	13.116	1.1018	-0.0096		6.76081	11.018	-0.193159
220803	13.144	1.1028	-0.0096		6.77524	11.028	-0.193159
221003	13.168	1.1038	-0.0096		6.78761	11.038	-0.193159
221203	13.192	1.1049	-0.0096		6.79999	11.049	-0.193159
221403	13.218	1.106	-0.0096		6.81339	11.06	-0.193159
221603	13.24	1.107	-0.0094		6.82473	11.07	-0.189135
221803	13.26	1.108	-0.0095		6.83504	11.08	-0.191147
222003	13.278	1.109	-0.0094		6.84432	11.09	-0.189135
222203	13.3	1.1099	-0.0094		6.85566	11.099	-0.189135
222403	13.32	1.1107	-0.0094		6.86596	11.107	-0.189135
222603	13.342	1.1118	-0.0093		6.8773	11.118	-0.187123
222803	13.368	1.1129	-0.0094		6.89071	11.129	-0.189135
223003	13.388	1.1139	-0.0093		6.90102	11.139	-0.187123
223203	13.412	1.1148	-0.0092		6.91339	11.148	-0.185111
223403	13.432	1.1158	-0.0092		6.9237	11.158	-0.185111
223603	13.456	1.1168	-0.0093		6.93607	11.168	-0.187123
223803	13.48	1.1179	-0.0092		6.94844	11.179	-0.185111
224003	13.504	1.1189	-0.0092		6.96081	11.189	-0.185111
224203	13.526	1.1199	-0.0091		6.97215	11.199	-0.183099
224403	13.548	1.1209	-0.0092		6.98349	11.209	-0.185111
224603	13.57	1.1219	-0.0093		6.99483	11.219	-0.187123
224803	13.592	1.123	-0.0096		7.00617	11.23	-0.193159
225003	13.612	1.1239	-0.0095		7.01648	11.239	-0.191147
225203	13.632	1.1249	-0.0096		7.02679	11.249	-0.193159
225403	13.656	1.1258	-0.0093		7.03916	11.258	-0.187123
225603	13.678	1.1268	-0.0093		7.0505	11.268	-0.187123
225803	13.704	1.1278	-0.0091		7.0639	11.278	-0.183099
226003	13.724	1.1289	-0.0091		7.07421	11.289	-0.183099
226203	13.75	1.1297	-0.0091		7.08761	11.297	-0.183099
226403	13.774	1.1309	-0.0089		7.09998	11.309	-0.179074
226603	13.798	1.1318	-0.0087		7.11236	11.318	-0.17505
226803	13.818	1.1328	-0.009		7.12267	11.328	-0.181087
227003	13.842	1.1338	-0.0095		7.13504	11.338	-0.191147
227203	13.862	1.1348	-0.0105		7.14535	11.348	-0.211268
227403	13.888	1.1359	-0.0107		7.15875	11.359	-0.215292
227603	13.908	1.1368	-0.0107		7.16906	11.368	-0.215292
227803	13.926	1.1378	-0.0107		7.17834	11.378	-0.215292
228003	13.948	1.1388	-0.0106		7.18968	11.388	-0.21328
228203	13.97	1.1399	-0.0106		7.20102	11.399	-0.21328
228403	13.992	1.1409	-0.0106		7.21236	11.409	-0.21328
228603	14.018	1.1419	-0.0105		7.22576	11.419	-0.211268
228803	14.042	1.1428	-0.0104		7.23813	11.428	-0.209256
229003	14.064	1.1439	-0.0104		7.24947	11.439	-0.209256
229203	14.086	1.1447	-0.0103		7.26081	11.447	-0.207243
229403	14.108	1.1458	-0.0102		7.27215	11.458	-0.205231
229603	14.132	1.1467	-0.0103		7.28452	11.467	-0.207243
229803	14.15	1.1478	-0.0102		7.2938	11.478	-0.205231
230003	14.174	1.1487	-0.0101		7.30617	11.487	-0.203219
230203	14.2	1.1498	-0.01		7.31957	11.498	-0.201207
230403	14.22	1.1509	-0.0099		7.32988	11.509	-0.199195
230603	14.244	1.1517	-0.0099		7.34225	11.517	-0.199195
230803	14.264	1.1527	-0.0098		7.35256	11.527	-0.197183
231003	14.286	1.1537	-0.0097		7.3639	11.537	-0.195171
231203	14.308	1.1548	-0.0096		7.37524	11.548	-0.193159
231403	14.332	1.1557	-0.0095		7.38761	11.557	-0.191147
231603	14.352	1.1567	-0.0094		7.39792	11.567	-0.189135
231803	14.376	1.1578	-0.0093		7.41029	11.578	-0.187123
232003	14.398	1.1587	-0.0091		7.42163	11.587	-0.183099
232203	14.424	1.1597	-0.0091		7.43504	11.597	-0.183099
232403	14.446	1.1608	-0.0089		7.44638	11.608	-0.179074
232603	14.466	1.1618	-0.0089		7.45669	11.618	-0.179074
232803	14.488	1.1628	-0.0087		7.46803	11.628	-0.17505
233003	14.504	1.1637	-0.0085		7.47627	11.637	-0.171026
233203	14.526	1.1647	-0.008		7.48761	11.647	-0.160966
233403	14.548	1.1657	-0.0083		7.49895	11.657	-0.167002
233603	14.57	1.1666	-0.0081		7.51029	11.666	-0.162978
233803	14.594	1.1677	-0.0079		7.52266	11.677	-0.158954
234003	14.616	1.1688	-0.0079		7.534	11.688	-0.158954
234203	14.64	1.1697	-0.0077		7.54638	11.697	-0.15493
234403	14.664	1.1707	-0.0077		7.55875	11.707	-0.15493
234603	14.692	1.1718	-0.0075		7.57318	11.718	-0.150905
234803	14.714	1.1729	-0.0073		7.58452	11.729	-0.146881
235003	14.734	1.1738	-0.0073		7.59483	11.738	-0.146881
235203	14.756	1.1747	-0.0073		7.60617	11.747	-0.146881
235403	14.78	1.1759	-0.0071		7.61854	11.759	-0.142857
235603	14.798	1.1767	-0.0069		7.62782	11.767	-0.138833
235803	14.822	1.1779	-0.0068		7.64019	11.779	-0.136821
236003	14.84	1.1787	-0.0067		7.64947	11.787	-0.134809
236203	14.864	1.1797	-0.0067		7.66184	11.797	-0.134809
236403	14.886	1.1806	-0.0065		7.67318	11.806	-0.130785
236603	14.912	1.1818	-0.0066		7.68658	11.818	-0.132797
236803	14.932	1.1827	-0.0064		7.69689	11.827	-0.128773
237003	14.954	1.1837	-0.0062		7.70823	11.837	-0.124748
237203	14.976	1.1848	-0.0062		7.71957	11.848	-0.124748
237403	14.994	1.1858	-0.0061		7.72885	11.858	-0.122736
237603	15.024	1.1867	-0.0059		7.74431	11.867	-0.118712
237803	15.046	1.1877	-0.0058		7.75565	11.877	-0.1167
238003	15.072	1.1889	-0.0057		7.76906	11.889	-0.114688
238203	15.094	1.1899	-0.0054		7.7804	11.899	-0.108652
238403	15.118	1.191	-0.005		7.79277	11.91	-0.100604
238603	15.138	1.1919	-0.0048		7.80308	11.919	-0.0965795
238803	15.16	1.1929	-0.0047		7.81442	11.929	-0.0945674
239003	15.178	1.1939	-0.0046		7.82369	11.939	-0.0925553
239203	15.2	1.1948	-0.0043		7.83503	11.948	-0.0865191
239403	15.224	1.1958	-0.0041		7.84741	11.958	-0.082495
239603	15.244	1.1969	-0.004		7.85772	11.969	-0.0804829
239803	15.262	1.1977	-0.0035		7.86699	11.977	-0.0704225
240003	15.274	1.1988	-0.003		7.87318	11.988	-0.0603622
240203	15.294	1.1998	-0.0022		7.88349	11.998	-0.0442656
240403	15.312	1.2008	0.0001		7.89277	12.008	0.00201207
240603	15.304	1.202	0.0011		7.88864	12.02	0.0221328
240803	15.306	1.2031	0.0025		7.88967	12.031	0.0503018
241003	15.308	1.2041	0.0031		7.8907	12.041	0.0623742
241203	15.3	1.2052	0.0038		7.88658	12.052	0.0764588
241403	15.296	1.2059	0.0046		7.88452	12.059	0.0925553
241603	15.306	1.2069	0.005		7.88967	12.069	0.100604
241803	15.318	1.2077	0.0052		7.89586	12.077	0.104628
242003	15.34	1.2087	0.0054		7.9072	12.087	0.108652
242203	15.362	1.2097	0.0056		7.91854	12.097	0.112676
242403	15.382	1.2108	0.0058		7.92885	12.108	0.1167
242603	15.404	1.2116	0.0058		7.94019	12.116	0.1167
242803	15.424	1.2126	0.006		7.9505	12.126	0.120724
243003	15.448	1.2137	0.0061		7.96287	12.137	0.122736
243203	15.47	1.2146	0.0062		7.97421	12.146	0.124748
243403	15.494	1.2157	0.0065		7.98658	12.157	0.130785
243603	15.516	1.2166	0.0066		7.99792	12.166	0.132797
243803	15.536	1.2177	0.0067		8.00823	12.177	0.134809
244003	15.558	1.2188	0.0069		8.01957	12.188	0.138833
244203	15.584	1.2196	0.0071		8.03297	12.196	0.142857
244403	15.608	1.2207	0.0072		8.04534	12.207	0.144869
244603	15.628	1.2216	0.0073		8.05565	12.216	0.146881
244803	15.654	1.2226	0.0075		8.06905	12.226	0.150905
245003	15.682	1.2237	0.0078		8.08349	12.237	0.156942
245203	15.704	1.2247	0.0079		8.09483	12.247	0.158954
245403	15.726	1.2256	0.0081		8.10617	12.256	0.162978
245603	15.746	1.2267	0.0083		8.11648	12.267	0.167002
245803	15.768	1.2277	0.0084		8.12782	12.277	0.169014
246003	15.79	1.2286	0.0085		8.13916	12.286	0.171026
246203	15.812	1.2297	0.0088		8.1505	12.297	0.177062
246403	15.832	1.2307	0.009		8.16081	12.307	0.181087
246603	15.852	1.2317	0.0092		8.17112	12.317	0.185111
246803	15.878	1.2327	0.0094		8.18452	12.327	0.189135
247003	15.898	1.2337	0.0096		8.19483	12.337	0.193159
247203	15.918	1.2347	0.0098		8.20514	12.347	0.197183
247403	15.95	1.2357	0.0099		8.22163	12.357	0.199195
247603	15.968	1.2368	0.0102		8.23091	12.368	0.205231
247803	15.988	1.2377	0.0104		8.24122	12.377	0.209256
248003	16.01	1.2387	0.0106		8.25256	12.387	0.21328
248203	16.03	1.2395	0.0108		8.26287	12.395	0.217304
248403	16.054	1.2406	0.011		8.27524	12.406	0.221328
248603	16.07	1.2417	0.0112		8.28349	12.417	0.225352
248803	16.092	1.2425	0.0114		8.29483	12.425	0.229376
249003	16.114	1.2437	0.0117		8.30617	12.437	0.235412
249203	16.132	1.2446	0.0119		8.31545	12.446	0.239437
249403	16.156	1.2457	0.0123		8.32782	12.457	0.247485
249603	16.176	1.2466	0.0126		8.33813	12.466	0.253521
249803	16.192	1.2476	0.0128		8.34637	12.476	0.257545
250003	16.216	1.2486	0.0131		8.35875	12.486	0.263581
250203	16.236	1.2497	0.0132		8.36905	12.497	0.265594
250403	16.256	1.2505	0.0135		8.37936	12.505	0.27163
250603	16.28	1.2516	0.0137		8.39173	12.516	0.275654
250803	16.302	1.2528	0.0139		8.40307	12.528	0.279678
251003	16.328	1.2537	0.0141		8.41648	12.537	0.283702
251203	16.344	1.2547	0.0143		8.42472	12.547	0.287726
251403	16.364	1.2557	0.0146		8.43503	12.557	0.293763
251603	16.386	1.2567	0.0148		8.44637	12.567	0.297787
251803	16.408	1.2577	0.015		8.45771	12.577	0.301811
252003	16.426	1.2586	0.0154		8.46699	12.586	0.309859
252203	16.448	1.2597	0.0155		8.47833	12.597	0.311871
252403	16.472	1.2608	0.0157		8.4907	12.608	0.315895
252603	16.492	1.2618	0.0158		8.50101	12.618	0.317907
252803	16.512	1.2628	0.016		8.51132	12.628	0.321932
253003	16.528	1.2637	0.0162		8.51957	12.637	0.325956
253203	16.55	1.2647	0.0163		8.53091	12.647	0.327968
253403	16.572	1.2657	0.0165		8.54225	12.657	0.331992
253603	16.594	1.2667	0.0167		8.55359	12.667	0.336016
253803	16.618	1.2678	0.0168		8.56596	12.678	0.338028
254003	16.636	1.2687	0.017		8.57524	12.687	0.342052
254203	16.658	1.2696	0.0173		8.58658	12.696	0.348089
254403	16.678	1.2709	0.0176		8.59689	12.709	0.354125
254603	16.7	1.2719	0.0179		8.60823	12.719	0.360161
254803	16.72	1.2728	0.0182		8.61854	12.728	0.366197
255003	16.74	1.2737	0.0183		8.62885	12.737	0.368209
255203	16.76	1.2748	0.0185		8.63916	12.748	0.372233
255403	16.776	1.2757	0.0187		8.6474	12.757	0.376258
255603	16.798	1.2767	0.019		8.65874	12.767	0.382294
255803	16.814	1.2777	0.0192		8.66699	12.777	0.386318
256003	16.83	1.2788	0.0194		8.67524	12.788	0.390342
256203	16.852	1.2796	0.0197		8.68658	12.796	0.396378
256403	16.868	1.2808	0.02		8.69483	12.808	0.402414
256603	16.888	1.2816	0.0203		8.70514	12.816	0.408451
256803	16.91	1.2826	0.0205		8.71648	12.826	0.412475
257003	16.932	1.2838	0.0208		8.72782	12.838	0.418511
257203	16.948	1.2847	0.021		8.73606	12.847	0.422535
257403	16.966	1.2858	0.0212		8.74534	12.858	0.426559
257603	16.982	1.2866	0.0215		8.75359	12.866	0.432596
257803	16.996	1.2876	0.0217		8.76081	12.876	0.43662
258003	17.006	1.2887	0.0219		8.76596	12.887	0.440644
258203	17.018	1.2896	0.0221		8.77215	12.896	0.444668
258403	17.028	1.2906	0.0224		8.7773	12.906	0.450704
258603	16.89	1.2924	0.025		8.70617	12.924	0.503018
258803	16.836	1.2931	0.0282		8.67833	12.931	0.567404
259003	16.81	1.2937	0.0296		8.66493	12.937	0.595573
259203	16.794	1.2946	0.0304		8.65668	12.946	0.61167
259403	16.792	1.2955	0.031		8.65565	12.955	0.623742
259603	16.806	1.2966	0.0316		8.66287	12.966	0.635815
259803	16.274	1.2982	0.0426		8.38864	12.982	0.857143
260003	15.918	1.298	0.0526		8.20514	12.98	1.05835
260203	15.886	1.2999	0.0555		8.18864	12.999	1.1167
260403	15.854	1.3003	0.0569		8.17215	13.003	1.14487
260603	15.87	1.3017	0.0575		8.18039	13.017	1.15694
260803	15.878	1.3028	0.058		8.18452	13.028	1.167
261003	15.85	1.3041	0.0583		8.17009	13.041	1.17304
261203	15.816	1.3048	0.0584		8.15256	13.048	1.17505
261403	15.814	1.3057	0.0588		8.15153	13.057	1.1831
261603	15.832	1.3067	0.0591		8.16081	13.067	1.18913
261803	15.846	1.3079	0.0594		8.16802	13.079	1.19517
262003	15.856	1.3088	0.0598		8.17318	13.088	1.20322
262203	15.866	1.3097	0.0602		8.17833	13.097	1.21127
262403	15.88	1.3106	0.0603		8.18555	13.106	1.21328
262603	15.902	1.3117	0.0607		8.19689	13.117	1.22133
262803	15.92	1.3125	0.061		8.20617	13.125	1.22736
263003	15.944	1.3137	0.0611		8.21854	13.137	1.22938
263203	15.964	1.3146	0.0614		8.22885	13.146	1.23541
263403	15.986	1.3157	0.0616		8.24019	13.157	1.23944
263603	16.004	1.3166	0.0618		8.24947	13.166	1.24346
263803	16.024	1.3176	0.062		8.25978	13.176	1.24748
264003	16.044	1.3186	0.0622		8.27009	13.186	1.25151
264203	16.064	1.3196	0.0626		8.28039	13.196	1.25956
264403	16.084	1.3207	0.063		8.2907	13.207	1.26761
264603	16.094	1.3216	0.0635		8.29586	13.216	1.27767
264803	16.112	1.3227	0.0638		8.30514	13.227	1.2837
265003	16.128	1.3235	0.0642		8.31338	13.235	1.29175
265203	16.144	1.3246	0.0644		8.32163	13.246	1.29577
265403	16.158	1.3257	0.0648		8.32885	13.257	1.30382
265603	16.166	1.3267	0.0653		8.33297	13.267	1.31388
265803	16.178	1.3277	0.0656		8.33916	13.277	1.31992
266003	16.194	1.3285	0.066		8.3474	13.285	1.32797
266203	16.21	1.3296	0.0662		8.35565	13.296	1.33199
266403	16.23	1.3306	0.0665		8.36596	13.306	1.33803
266603	16.248	1.3316	0.0668		8.37524	13.316	1.34406
266803	16.272	1.3325	0.067		8.38761	13.325	1.34809
267003	16.29	1.3336	0.0673		8.39689	13.336	1.35412
267203	16.308	1.3348	0.0675		8.40617	13.348	1.35815
267403	16.328	1.3356	0.0678		8.41648	13.356	1.36419
267603	16.348	1.3368	0.0681		8.42679	13.368	1.37022
267803	16.362	1.3379	0.0684		8.434	13.379	1.37626
268003	16.248	1.3395	0.0695		8.37524	13.395	1.39839
268203	16.122	1.3396	0.0716		8.31029	13.396	1.44064
268403	16.12	1.3403	0.0726		8.30926	13.403	1.46076
268603	16.148	1.3421	0.0733		8.32369	13.421	1.47485
268803	16.138	1.3425	0.0739		8.31854	13.425	1.48692
269003	16.154	1.3434	0.0743		8.32679	13.434	1.49497
269203	16.188	1.3447	0.0745		8.34431	13.447	1.49899
269403	16.21	1.3458	0.0748		8.35565	13.458	1.50503
269603	16.22	1.3467	0.0751		8.36081	13.467	1.51107
269803	16.24	1.3477	0.0754		8.37112	13.477	1.5171
270003	16.256	1.3485	0.0757		8.37936	13.485	1.52314
270203	16.276	1.3497	0.076		8.38967	13.497	1.52918
270403	16.3	1.3507	0.0763		8.40204	13.507	1.53521
270603	16.304	1.3517	0.0768		8.40411	13.517	1.54527
270803	16.312	1.3529	0.0773		8.40823	13.529	1.55533
271003	16.318	1.3537	0.0777		8.41132	13.537	1.56338
271203	16.338	1.3546	0.0781		8.42163	13.546	1.57143
271403	16.354	1.3556	0.0784		8.42988	13.556	1.57746
271603	16.372	1.3566	0.0787		8.43916	13.566	1.5835
271803	16.394	1.3577	0.0791		8.4505	13.577	1.59155
272003	16.416	1.3587	0.0795		8.46184	13.587	1.5996
272203	16.424	1.3597	0.0802		8.46596	13.597	1.61368
272403	16.378	1.361	0.0827		8.44225	13.61	1.66398
272603	16.382	1.3619	0.0833		8.44431	13.619	1.67606
272803	16.374	1.3629	0.0843		8.44019	13.629	1.69618
273003	16.37	1.3638	0.0851		8.43813	13.638	1.71227
273203	16.372	1.3648	0.0855		8.43916	13.648	1.72032
273403	16.378	1.3657	0.086		8.44225	13.657	1.73038
273603	16.394	1.3667	0.0863		8.4505	13.667	1.73642
273803	16.398	1.3678	0.0866		8.45256	13.678	1.74245
274003	16.364	1.3688	0.0877		8.43503	13.688	1.76459
274203	16.354	1.3699	0.0889		8.42988	13.699	1.78873
274403	16.358	1.3707	0.0894		8.43194	13.707	1.79879
274603	16.372	1.3715	0.0897		8.43916	13.715	1.80483
274803	16.392	1.3725	0.0901		8.44947	13.725	1.81288
275003	16.408	1.3736	0.0905		8.45771	13.736	1.82093
275203	16.424	1.3745	0.0907		8.46596	13.745	1.82495
275403	16.438	1.3757	0.091		8.47318	13.757	1.83099
275603	16.454	1.3766	0.0913		8.48143	13.766	1.83702
275803	16.468	1.3775	0.0915		8.48864	13.775	1.84105
276003	16.488	1.3787	0.0918		8.49895	13.787	1.84708
276203	16.5	1.3794	0.0921		8.50514	13.794	1.85312
276403	16.52	1.3807	0.0924		8.51545	13.807	1.85915
276603	16.536	1.3814	0.0926		8.52369	13.814	1.86318
276803	16.552	1.3826	0.093		8.53194	13.826	1.87123
277003	16.558	1.3838	0.0933		8.53503	13.838	1.87726
277203	16.536	1.3848	0.0938		8.52369	13.848	1.88732
277403	16.512	1.3857	0.0944		8.51132	13.857	1.8994
277603	16.502	1.3866	0.0951		8.50617	13.866	1.91348
277803	16.478	1.3876	0.096		8.4938	13.876	1.93159
278003	16.464	1.3885	0.097		8.48658	13.885	1.95171
278203	16.46	1.3896	0.098		8.48452	13.896	1.97183
278403	16.464	1.3906	0.0992		8.48658	13.906	1.99598
278603	16.472	1.3916	0.1001		8.4907	13.916	2.01408
278803	16.482	1.3925	0.1013		8.49586	13.925	2.03823
279003	16.484	1.3936	0.1037		8.49689	13.936	2.08652
279203	16.46	1.3949	0.1209		8.48452	13.949	2.4326
279403	16.424	1.3959	0.1404		8.46596	13.959	2.82495
279603	16.366	1.397	0.1723		8.43606	13.97	3.4668
279803	16.338	1.3978	0.1774		8.42163	13.978	3.56942
280003	16.318	1.399	0.1814		8.41132	13.99	3.6499
280203	16.188	1.4005	0.19		8.34431	14.005	3.82294
280403	16.042	1.4003	0.1953		8.26905	14.003	3.92958
280603	15.966	1.4013	0.1996		8.22988	14.013	4.0161
280803	15.922	1.4026	0.2029		8.2072	14.026	4.08249
281003	15.888	1.4035	0.2059		8.18967	14.035	4.14286
281203	15.884	1.4046	0.2077		8.18761	14.046	4.17907
281403	15.87	1.4057	0.2119		8.18039	14.057	4.26358
281603	15.868	1.4068	0.214		8.17936	14.068	4.30584
281803	15.866	1.4075	0.2155		8.17833	14.075	4.33602
282003	15.876	1.4084	0.2165		8.18349	14.084	4.35614
282203	15.894	1.4095	0.2176		8.19277	14.095	4.37827
282403	15.906	1.4106	0.2183		8.19895	14.106	4.39235
282603	15.89	1.4117	0.221		8.1907	14.117	4.44668
282803	15.89	1.4125	0.2226		8.1907	14.125	4.47887
283003	15.882	1.4138	0.2236		8.18658	14.138	4.49899
283203	15.876	1.4146	0.2243		8.18349	14.146	4.51308
283403	15.878	1.4155	0.225		8.18452	14.155	4.52716
283603	15.882	1.4164	0.2258		8.18658	14.164	4.54326
283803	15.892	1.4172	0.2266		8.19174	14.172	4.55936
284003	15.908	1.4183	0.2273		8.19998	14.183	4.57344
284203	15.926	1.4194	0.2281		8.20926	14.194	4.58954
284403	15.946	1.4204	0.2287		8.21957	14.204	4.60161
284603	15.968	1.4214	0.2295		8.23091	14.214	4.61771
284803	15.988	1.4224	0.2302		8.24122	14.224	4.63179
285003	16.006	1.4235	0.2309		8.2505	14.235	4.64588
285203	16.024	1.4244	0.2316		8.25978	14.244	4.65996
285403	16.05	1.4255	0.2323		8.27318	14.255	4.67404
285603	16.066	1.4265	0.2328		8.28143	14.265	4.6841
285803	16.086	1.4274	0.2335		8.29173	14.274	4.69819
286003	16.106	1.4284	0.2341		8.30204	14.284	4.71026
286203	16.126	1.4294	0.2347		8.31235	14.294	4.72233
286403	16.144	1.4304	0.2355		8.32163	14.304	4.73843
286603	16.154	1.4314	0.2361		8.32679	14.314	4.7505
286803	16.17	1.4324	0.2367		8.33503	14.324	4.76258
287003	16.188	1.4334	0.2375		8.34431	14.334	4.77867
287203	16.204	1.4345	0.2382		8.35256	14.345	4.79276
287403	16.22	1.4355	0.2388		8.36081	14.355	4.80483
287603	16.236	1.4364	0.2397		8.36905	14.364	4.82294
287803	16.256	1.4373	0.2403		8.37936	14.373	4.83501
288003	16.276	1.4385	0.2411		8.38967	14.385	4.85111
288203	16.296	1.4395	0.2418		8.39998	14.395	4.86519
288403	16.308	1.4404	0.2425		8.40617	14.404	4.87928
288603	16.328	1.4414	0.2432		8.41648	14.414	4.89336
288803	16.348	1.4425	0.2438		8.42679	14.425	4.90543
289003	16.366	1.4435	0.2445		8.43606	14.435	4.91952
289203	16.382	1.4445	0.2452		8.44431	14.445	4.9336
289403	16.4	1.4455	0.2462		8.45359	14.455	4.95372
289603	16.414	1.4465	0.2471		8.46081	14.465	4.97183
289803	16.428	1.4475	0.2481		8.46802	14.475	4.99195
290003	16.444	1.4485	0.249		8.47627	14.485	5.01006
290203	16.46	1.4495	0.2498		8.48452	14.495	5.02616
290403	16.472	1.4505	0.2505		8.4907	14.505	5.04024
290603	16.484	1.4515	0.2513		8.49689	14.515	5.05634
290803	16.496	1.4526	0.2521		8.50307	14.526	5.07243
291003	16.504	1.4535	0.2529		8.5072	14.535	5.08853
291203	16.516	1.4546	0.2537		8.51338	14.546	5.10463
291403	16.528	1.4557	0.2545		8.51957	14.557	5.12072
291603	16.536	1.4567	0.2552		8.52369	14.567	5.13481
291803	16.544	1.4577	0.2559		8.52782	14.577	5.14889
292003	16.556	1.4586	0.2566		8.534	14.586	5.16298
292203	16.564	1.4595	0.2572		8.53813	14.595	5.17505
292403	16.572	1.4605	0.2579		8.54225	14.605	5.18913
292603	16.582	1.4615	0.2585		8.5474	14.615	5.20121
292803	16.596	1.4625	0.2592		8.55462	14.625	5.21529
293003	16.604	1.4635	0.2599		8.55874	14.635	5.22938
293203	16.62	1.4644	0.2604		8.56699	14.644	5.23944
293403	16.638	1.4655	0.2611		8.57627	14.655	5.25352
293603	16.65	1.4666	0.2618		8.58246	14.666	5.26761
293803	16.664	1.4675	0.2623		8.58967	14.675	5.27767
294003	16.678	1.4685	0.2629		8.59689	14.685	5.28974
294203	16.698	1.4697	0.2635		8.6072	14.697	5.30181
294403	16.71	1.4706	0.2641		8.61338	14.706	5.31388
294603	16.718	1.4717	0.2648		8.61751	14.717	5.32797
294803	16.722	1.4726	0.2654		8.61957	14.726	5.34004
295003	16.728	1.4738	0.2661		8.62266	14.738	5.35412
295203	16.732	1.4746	0.2668		8.62472	14.746	5.36821
295403	16.742	1.4755	0.2675		8.62988	14.755	5.38229
295603	16.756	1.4766	0.2681		8.63709	14.766	5.39437
295803	16.766	1.4775	0.2687		8.64225	14.775	5.40644
296003	16.78	1.4784	0.2694		8.64947	14.784	5.42052
296203	16.79	1.4794	0.2701		8.65462	14.794	5.43461
296403	16.804	1.4804	0.2707		8.66184	14.804	5.44668
296603	16.816	1.4815	0.2715		8.66802	14.815	5.46278
296803	16.826	1.4824	0.2721		8.67318	14.824	5.47485
297003	16.834	1.4834	0.2728		8.6773	14.834	5.48893
297203	16.844	1.4845	0.2735		8.68246	14.845	5.50302
297403	16.86	1.4855	0.2741		8.6907	14.855	5.51509
297603	16.87	1.4864	0.2748		8.69586	14.864	5.52918
297803	16.882	1.4873	0.2756		8.70204	14.873	5.54527
298003	16.898	1.4885	0.2765		8.71029	14.885	5.56338
298203	16.912	1.4894	0.2772		8.71751	14.894	5.57746
298403	16.928	1.4905	0.2777		8.72575	14.905	5.58753
298603	16.938	1.4915	0.2784		8.73091	14.915	5.60161
298803	16.95	1.4924	0.2791		8.73709	14.924	5.61569
299003	16.962	1.4936	0.2799		8.74328	14.936	5.63179
299203	16.972	1.4945	0.2805		8.74843	14.945	5.64386
299403	16.5	1.4932	0.2966		8.50514	14.932	5.96781
299603	16.374	1.4951	0.3009		8.44019	14.951	6.05433
299803	16.56	1.4991	0.3028		8.53606	14.991	6.09256
300003	16.446	1.4974	0.3042		8.4773	14.974	6.12072
300203	16.554	1.499	0.3051		8.53297	14.99	6.13883
300403	16.58	1.5004	0.306		8.54637	15.004	6.15694
300603	16.58	1.5011	0.307		8.54637	15.011	6.17706
300803	16.538	1.5017	0.3079		8.52472	15.017	6.19517
301003	16.564	1.5036	0.3087		8.53813	15.036	6.21127
301203	16.662	1.5053	0.3094		8.58864	15.053	6.22535
301403	16.596	1.5049	0.3103		8.55462	15.049	6.24346
301603	16.616	1.5066	0.3113		8.56493	15.066	6.26358
301803	16.652	1.5074	0.3123		8.58349	15.074	6.2837
302003	16.598	1.508	0.3134		8.55565	15.08	6.30584
302203	16.686	1.5099	0.3145		8.60101	15.099	6.32797
302403	16.656	1.5105	0.3158		8.58555	15.105	6.35412
302603	16.648	1.5112	0.3173		8.58142	15.112	6.38431
302803	16.666	1.5125	0.3187		8.5907	15.125	6.41247
303003	16.652	1.5136	0.3214		8.58349	15.136	6.4668
303203	16.624	1.5147	0.3252		8.56905	15.147	6.54326
303403	16.604	1.5156	0.3283		8.55874	15.156	6.60563
303603	16.588	1.5166	0.3306		8.5505	15.166	6.65191
303803	16.586	1.5175	0.3324		8.54947	15.175	6.68813
304003	16.588	1.5186	0.334		8.5505	15.186	6.72032
304203	16.588	1.5194	0.3356		8.5505	15.194	6.75252
304403	16.6	1.5205	0.337		8.55668	15.205	6.78068
304603	16.61	1.5214	0.3384		8.56184	15.214	6.80885
304803	16.62	1.5224	0.3396		8.56699	15.224	6.833
305003	16.632	1.5235	0.3408		8.57318	15.235	6.85714
305203	16.644	1.5245	0.3422		8.57936	15.245	6.88531
305403	16.654	1.5257	0.3433		8.58452	15.257	6.90744
305603	16.668	1.5265	0.3445		8.59173	15.265	6.93159
305803	16.682	1.5275	0.3455		8.59895	15.275	6.95171
306003	16.696	1.5285	0.3466		8.60617	15.285	6.97384
306203	16.704	1.5294	0.3476		8.61029	15.294	6.99396
306403	16.722	1.5305	0.3487		8.61957	15.305	7.0161
306603	16.728	1.5314	0.3496		8.62266	15.314	7.03421
306803	16.748	1.5326	0.3506		8.63297	15.326	7.05433
307003	16.754	1.5335	0.3517		8.63606	15.335	7.07646
307203	16.758	1.5346	0.3546		8.63813	15.346	7.13481
307403	16.764	1.5354	0.3563		8.64122	15.354	7.16901
307603	16.766	1.5364	0.358		8.64225	15.364	7.20322
307803	16.774	1.5375	0.3596		8.64637	15.375	7.23541
308003	16.77	1.5384	0.3609		8.64431	15.384	7.26157
308203	16.78	1.5394	0.3622		8.64947	15.394	7.28773
308403	16.788	1.5403	0.3635		8.65359	15.403	7.31388
308603	16.802	1.5413	0.3646		8.66081	15.413	7.33602
308803	16.81	1.5424	0.3659		8.66493	15.424	7.36217
309003	16.82	1.5433	0.3672		8.67008	15.433	7.38833
309203	16.82	1.5446	0.3692		8.67008	15.446	7.42857
309403	16.82	1.5456	0.3715		8.67008	15.456	7.47485
309603	16.814	1.5466	0.3733		8.66699	15.466	7.51107
309803	16.818	1.5475	0.3747		8.66905	15.475	7.53924
310003	16.826	1.5485	0.3759		8.67318	15.485	7.56338
310203	16.808	1.5498	0.3774		8.6639	15.498	7.59356
310403	16.722	1.551	0.3815		8.61957	15.51	7.67606
310603	16.684	1.5519	0.3859		8.59998	15.519	7.76459
310803	16.664	1.5525	0.3887		8.58967	15.525	7.82093
311003	16.656	1.5535	0.3909		8.58555	15.535	7.86519
311203	16.612	1.5549	0.3928		8.56287	15.549	7.90342
311403	16.584	1.5557	0.395		8.54844	15.557	7.94769
311603	16.556	1.5567	0.397		8.534	15.567	7.98793
311803	16.534	1.5575	0.3986		8.52266	15.575	8.02012
312003	16.53	1.5585	0.4009		8.5206	15.585	8.0664
312203	16.372	1.5602	0.4075		8.43916	15.602	8.1992
312403	16.29	1.5601	0.4102		8.39689	15.601	8.25352
312603	16.312	1.5613	0.4099		8.40823	15.613	8.24748
312803	16.286	1.5627	0.4119		8.39483	15.627	8.28773
313003	16.234	1.563	0.4163		8.36802	15.63	8.37626
313203	16.27	1.5649	0.418		8.38658	15.649	8.41046
313403	16.26	1.5657	0.4196		8.38143	15.657	8.44266
313603	16.256	1.5664	0.4209		8.37936	15.664	8.46881
313803	16.272	1.5673	0.422		8.38761	15.673	8.49095
314003	16.276	1.5682	0.4229		8.38967	15.682	8.50905
314203	16.28	1.5694	0.4242		8.39173	15.694	8.53521
314403	16.292	1.5704	0.4264		8.39792	15.704	8.57948
314603	16.298	1.5715	0.4284		8.40101	15.715	8.61972
314803	16.292	1.5727	0.4301		8.39792	15.727	8.65392
315003	16.294	1.5734	0.4317		8.39895	15.734	8.68612
315203	16.3	1.5743	0.4328		8.40204	15.743	8.70825
315403	16.318	1.5755	0.4339		8.41132	15.755	8.73038
315603	16.33	1.5765	0.435		8.41751	15.765	8.75252
315803	16.346	1.5775	0.4359		8.42576	15.775	8.77062
316003	16.354	1.5784	0.4371		8.42988	15.784	8.79477
316203	16.36	1.5793	0.4385		8.43297	15.793	8.82294
316403	16.372	1.5804	0.44		8.43916	15.804	8.85312
316603	16.38	1.5815	0.4417		8.44328	15.815	8.88732
316803	16.392	1.5825	0.4442		8.44947	15.825	8.93763
317003	16.4	1.5835	0.4468		8.45359	15.835	8.98994
317203	16.412	1.5845	0.4491		8.45978	15.845	9.03622
317403	16.416	1.5855	0.4509		8.46184	15.855	9.07243
317603	16.42	1.5862	0.4527		8.4639	15.862	9.10865
317803	16.426	1.5873	0.4542		8.46699	15.873	9.13883
318003	16.444	1.5885	0.4556		8.47627	15.885	9.167
318203	16.448	1.5894	0.4571		8.47833	15.894	9.19718
318403	16.444	1.5905	0.4585		8.47627	15.905	9.22535
318603	16.108	1.5912	0.4692		8.30308	15.912	9.44064
318803	15.96	1.5924	0.4821		8.22679	15.924	9.7002
319003	15.902	1.5937	0.4873		8.19689	15.937	9.80483
319203	15.866	1.5945	0.4904		8.17833	15.945	9.8672
319403	15.844	1.5955	0.4925		8.16699	15.955	9.90946
319603	15.802	1.5965	0.4947		8.14534	15.965	9.95372
319803	15.778	1.5976	0.4968		8.13297	15.976	9.99598
320003	15.77	1.5986	0.4985		8.12885	15.986	10.0302
320203	15.648	1.6001	0.5039		8.06596	16.001	10.1388
320403	15.6	1.6003	0.5058		8.04122	16.003	10.1771
320603	15.604	1.601	0.5068		8.04328	16.01	10.1972
320803	15.642	1.6026	0.5078		8.06287	16.026	10.2173
321003	15.66	1.6038	0.5088		8.07215	16.038	10.2374
321203	15.666	1.6045	0.5097		8.07524	16.045	10.2555
321403	15.682	1.6054	0.5106		8.08349	16.054	10.2736
321603	15.694	1.6064	0.5115		8.08967	16.064	10.2918
321803	15.712	1.6074	0.5123		8.09895	16.074	10.3078
322003	15.734	1.6084	0.5132		8.11029	16.084	10.326
322203	15.744	1.6095	0.5142		8.11545	16.095	10.3461
322403	15.762	1.6103	0.515		8.12472	16.103	10.3622
322603	15.778	1.6114	0.5159		8.13297	16.114	10.3803
322803	15.798	1.6124	0.5168		8.14328	16.124	10.3984
323003	15.814	1.6134	0.5175		8.15153	16.134	10.4125
323203	15.832	1.6143	0.5185		8.16081	16.143	10.4326
323403	15.85	1.6156	0.5193		8.17009	16.156	10.4487
323603	15.864	1.6165	0.5202		8.1773	16.165	10.4668
323803	15.878	1.6174	0.5211		8.18452	16.174	10.4849
324003	15.894	1.6184	0.5221		8.19277	16.184	10.505
324203	15.908	1.6194	0.523		8.19998	16.194	10.5231
324403	15.922	1.6205	0.524		8.2072	16.205	10.5433
324603	15.928	1.6214	0.525		8.21029	16.214	10.5634
324803	15.932	1.6225	0.5259		8.21235	16.225	10.5815
325003	15.942	1.6235	0.5269		8.21751	16.235	10.6016
325203	15.95	1.6245	0.5279		8.22163	16.245	10.6217
325403	15.964	1.6254	0.5288		8.22885	16.254	10.6398
325603	15.976	1.6264	0.5297		8.23503	16.264	10.6579
325803	15.99	1.6276	0.5308		8.24225	16.276	10.6801
326003	16.004	1.6285	0.532		8.24947	16.285	10.7042
326203	16.01	1.6294	0.5332		8.25256	16.294	10.7284
326403	16.02	1.6305	0.5344		8.25771	16.305	10.7525
[truncated: 478 more rows]
