# Supplementary material for: Physical and Mechanical Properties of Gypsum‐Like Rock Materials
Source: Hindawi journal article supplement (doi:10.1155/2020/3703706), 2020-01-01
Supplement: f1 [file 3703706.f1.zip › 3703706.f1/Natural triaxial compression test data.xlsx]

## Sheet: F-3
Force (large)	--	journey	) Results Report
17:21:53,06/23/2019
Diameter: 49.9	mm	Height: 99.9	mm
Vertical force transducer (Test piece vertical force)
Control mode: force/confining pressure	Waveform: Slope
KN/s	Force the finish: 5.780	KN	Confining pressure rate :0.500	MPa/s	End point of confining pressure 2.9640	MPa
Time (ms)	Vertical force (KN)	Vertical deformation (mm)	Confining pressure (MPa)				stress	axial strain
0	0	0	0				0	0
200	0.04	-0.00031	0.002				0.0204536	-0.0031031
400	0.06	-0.00032	0				0.0306803	-0.0032032
600	0.18	-0.00036	0.004				0.092041	-0.0036036
801	0.46	-0.00036	0.014				0.235216	-0.0036036
1003	0.56	-0.0005	0.019				0.28635	-0.00500501
1204	0.76	-0.00067	0.028				0.388618	-0.00670671
1404	0.94	-0.00173	0.04				0.480659	-0.0173173
1604	1.16	-0.00441	0.062				0.593153	-0.0441441
1805	1.26	-0.00704	0.088				0.644287	-0.0704705
2005	1.52	-0.00933	0.131				0.777235	-0.0933934
2206	1.8	-0.01173	0.189				0.92041	-0.117417
2406	1.88	-0.01276	0.272				0.961318	-0.127728
2606	2.14	-0.01235	0.367				1.09427	-0.123624
2807	2.52	-0.01118	0.447				1.28857	-0.111912
3007	2.88	-0.00781	0.523				1.47266	-0.0781782
3208	2.98	-0.00664	0.589				1.52379	-0.0664665
3408	3.04	-0.00546	0.673				1.55447	-0.0546547
3608	3.26	-0.00324	0.777				1.66697	-0.0324324
3808	3.54	0.00356	0.94				1.81014	0.0356356
4009	3.92	0.00873	1.261				2.00445	0.0873874
4211	4.06	0.01208	1.697				2.07604	0.120921
4412	4.2	0.01393	1.902				2.14762	0.139439
4612	4.34	0.01588	2.043				2.21921	0.158959
4812	4.62	0.01808	2.39				2.36239	0.180981
5013	4.72	0.02045	2.493				2.41352	0.204705
5213	4.74	0.02254	2.56				2.42375	0.225626
5414	5	0.02495	2.663				2.5567	0.24975
5614	5.28	0.02915	2.767				2.69987	0.291792
5814	5.6	0.03314	2.867				2.8635	0.331732
6015	5.78	0.03708	2.964				2.95554	0.371171
6119	5.96	0.03921	3.015				3.04758	0.392492
6137	6.06	0.03928	3.015				3.09872	0.393193
6337	5.64	0.04033	2.994				2.88395	0.403704
6537	6.12	0.04156	2.992				3.1294	0.416016
6737	5.96	0.04251	2.992				3.04758	0.425526
6937	6.04	0.04329	2.991				3.08849	0.433333
7137	6.14	0.04435	2.992				3.13962	0.443944
7337	6.24	0.04542	2.991				3.19076	0.454655
7537	6.3	0.0465	2.989				3.22144	0.465465
7737	6.36	0.04747	2.992				3.25212	0.475175
7937	6.42	0.04845	2.992				3.2828	0.484985
8137	6.44	0.04945	2.99				3.29302	0.494995
8337	6.46	0.05044	2.991				3.30325	0.504905
8537	6.64	0.05138	2.992				3.39529	0.514314
8737	6.7	0.05226	2.991				3.42597	0.523123
8937	6.66	0.05337	2.989				3.40552	0.534234
9137	6.76	0.05443	2.99				3.45665	0.544845
9337	6.82	0.05531	2.992				3.48733	0.553654
9537	6.86	0.0563	2.992				3.50779	0.563564
9737	6.94	0.05737	2.99				3.54869	0.574274
9937	7.02	0.05834	2.99				3.5896	0.583984
10137	7.12	0.05921	2.99				3.64073	0.592693
10337	7.16	0.06019	2.989				3.66119	0.602503
10537	7.26	0.06126	2.989				3.71232	0.613213
10737	7.4	0.06211	2.99				3.78391	0.621722
10937	7.46	0.06309	2.991				3.81459	0.631532
11137	7.42	0.0641	2.991				3.79414	0.641642
11337	7.58	0.06505	2.989				3.87595	0.651151
11537	7.62	0.06603	2.993				3.8964	0.660961
11737	7.58	0.06695	2.991				3.87595	0.67017
11937	7.72	0.068	2.989				3.94754	0.680681
12137	7.62	0.06893	2.987				3.8964	0.68999
12337	7.8	0.06987	2.991				3.98845	0.699399
12537	7.98	0.07081	2.99				4.08049	0.708809
12737	7.88	0.07174	2.989				4.02935	0.718118
12937	7.94	0.07272	2.991				4.06003	0.727928
13137	8.08	0.07367	2.991				4.13162	0.737437
13337	8.18	0.07454	2.992				4.18275	0.746146
13537	8.2	0.07553	2.99				4.19298	0.756056
13737	8.34	0.07648	2.988				4.26457	0.765566
13937	8.28	0.0775	2.99				4.23389	0.775776
14137	8.4	0.07856	2.99				4.29525	0.786386
14337	8.4	0.07946	2.987				4.29525	0.795395
14537	8.52	0.08032	2.99				4.35661	0.804004
14737	8.48	0.08133	2.99				4.33616	0.814114
14937	8.58	0.0823	2.99				4.38729	0.823824
15137	8.7	0.08336	2.991				4.44865	0.834434
15337	8.72	0.08445	2.99				4.45888	0.845345
15537	8.82	0.08541	2.99				4.51001	0.854955
15737	8.9	0.08639	2.993				4.55092	0.864765
15937	9.02	0.08734	2.989				4.61228	0.874274
16137	8.94	0.08837	2.989				4.57137	0.884585
16337	9.12	0.08931	2.989				4.66341	0.893994
16537	9.16	0.09039	2.988				4.68387	0.904805
16737	9.2	0.09138	2.988				4.70432	0.914715
16937	9.34	0.09233	2.987				4.77591	0.924224
17137	9.36	0.09322	2.989				4.78613	0.933133
17337	9.44	0.0942	2.989				4.82704	0.942943
17537	9.54	0.09516	2.993				4.87818	0.952553
17737	9.54	0.09516	2.993				4.87818	0.952553
17937	9.42	0.0972	2.99				4.81681	0.972973
18137	9.3	0.09825	2.988				4.75545	0.983483
18337	9.4	0.09891	2.991				4.80659	0.99009
18537	9.6	0.09964	2.989				4.90886	0.997397
18737	9.72	0.1011	2.988				4.97022	1.01201
18937	9.68	0.10231	2.992				4.94976	1.02412
19137	9.76	0.10328	2.991				4.99067	1.03383
19337	9.8	0.10427	2.989				5.01112	1.04374
19537	9.9	0.10514	2.991				5.06226	1.05245
19737	9.94	0.10612	2.993				5.08271	1.06226
19937	10	0.1071	2.991				5.11339	1.07207
20137	10.04	0.10799	2.991				5.13384	1.08098
20337	10.06	0.10898	2.992				5.14407	1.09089
20537	10.08	0.10997	2.989				5.1543	1.1008
20737	10.2	0.11083	2.992				5.21566	1.10941
20937	10.3	0.1119	2.993				5.26679	1.12012
21137	10.32	0.11289	2.991				5.27702	1.13003
21337	10.42	0.11385	2.989				5.32815	1.13964
21537	10.48	0.11493	2.993				5.35883	1.15045
21737	10.62	0.11578	2.991				5.43042	1.15896
21937	10.58	0.1168	2.985				5.40997	1.16917
22137	10.58	0.1178	2.995				5.40997	1.17918
22337	10.64	0.11888	2.988				5.44065	1.18999
22537	10.78	0.11973	2.988				5.51224	1.1985
22737	10.9	0.12089	2.991				5.5736	1.21011
22937	10.84	0.12171	2.99				5.54292	1.21832
23137	11	0.12255	2.992				5.62473	1.22673
23337	10.94	0.12357	2.993				5.59405	1.23694
23537	11.04	0.12444	2.99				5.64518	1.24565
23737	11.16	0.12539	2.988				5.70654	1.25516
23937	11.08	0.12642	2.993				5.66564	1.26547
24137	11.24	0.12727	2.987				5.74745	1.27397
24337	11.24	0.12837	2.992				5.74745	1.28498
24537	11.28	0.12945	2.994				5.76791	1.2958
24737	11.44	0.1303	2.989				5.84972	1.3043
24937	11.46	0.13129	2.993				5.85995	1.31421
25137	11.52	0.13227	2.99				5.89063	1.32402
25337	11.54	0.13316	2.99				5.90085	1.33293
25537	11.6	0.13414	2.993				5.93153	1.34274
25737	11.7	0.13501	2.991				5.98267	1.35145
25937	11.86	0.13585	2.992				6.06448	1.35986
26137	11.86	0.13695	2.991				6.06448	1.37087
26337	11.92	0.13793	2.991				6.09516	1.38068
26537	12.06	0.13888	2.99				6.16675	1.39019
26737	12.02	0.13989	2.992				6.1463	1.4003
26937	12.1	0.14097	2.989				6.1872	1.41111
27137	12.2	0.14193	2.988				6.23834	1.42072
27337	12.24	0.14302	2.991				6.25879	1.43163
27537	12.34	0.14398	2.991				6.30992	1.44124
27737	12.46	0.14514	2.993				6.37129	1.45285
27937	12.44	0.14595	2.986				6.36106	1.46096
28137	12.4	0.14696	2.99				6.34061	1.47107
28337	12.38	0.14787	2.99				6.33038	1.48018
28537	12.52	0.14882	2.99				6.40197	1.48969
28737	12.62	0.14978	2.991				6.4531	1.4993
28937	12.64	0.15068	2.992				6.46333	1.50831
29137	12.78	0.15163	2.989				6.53491	1.51782
29337	12.74	0.15264	2.988				6.51446	1.52793
29537	12.84	0.15351	2.991				6.56559	1.53664
29737	12.9	0.15459	2.99				6.59627	1.54745
29937	13	0.15555	2.989				6.64741	1.55706
30137	13.02	0.15654	2.989				6.65764	1.56697
30337	13.08	0.15752	2.989				6.68832	1.57678
30537	13.14	0.1586	2.992				6.719	1.58759
30737	13.2	0.15948	2.993				6.74968	1.5964
30937	13.22	0.16047	2.991				6.7599	1.60631
31137	13.3	0.16145	2.99				6.80081	1.61612
31337	13.34	0.16243	2.99				6.82126	1.62593
31537	13.44	0.1633	2.992				6.8724	1.63463
31737	13.62	0.16433	2.99				6.96444	1.64494
31937	13.62	0.16533	2.989				6.96444	1.65495
32137	13.68	0.16631	2.99				6.99512	1.66476
32337	13.72	0.1673	2.989				7.01557	1.67467
32537	13.82	0.16836	2.989				7.06671	1.68529
32737	13.84	0.16936	2.991				7.07693	1.6953
32937	13.92	0.17033	2.989				7.11784	1.70501
33137	14.04	0.17129	2.994				7.1792	1.71461
33337	14.1	0.17227	2.99				7.20988	1.72442
33537	14.12	0.17316	2.992				7.22011	1.73333
33737	14.18	0.17414	2.99				7.25079	1.74314
33937	14.34	0.17518	2.993				7.3326	1.75355
34137	14.38	0.17607	2.988				7.35306	1.76246
34337	14.42	0.17705	2.992				7.37351	1.77227
34537	14.54	0.17811	2.992				7.43487	1.78288
34737	14.52	0.17912	2.991				7.42464	1.79299
34937	14.58	0.1802	2.99				7.45532	1.8038
35137	14.76	0.18123	2.991				7.54737	1.81411
35337	14.78	0.18213	2.991				7.55759	1.82312
35537	14.84	0.18301	2.99				7.58827	1.83193
35737	14.92	0.18398	2.992				7.62918	1.84164
35937	15.04	0.18494	2.991				7.69054	1.85125
36137	15.12	0.18591	2.991				7.73145	1.86096
36337	15.06	0.18683	2.991				7.70077	1.87017
36537	15.2	0.18778	2.99				7.77235	1.87968
36737	15.28	0.18865	2.989				7.81326	1.88839
36937	15.28	0.18965	2.99				7.81326	1.8984
37137	15.32	0.19064	2.991				7.83372	1.90831
37337	15.48	0.19168	2.989				7.91553	1.91872
37537	15.5	0.19258	2.991				7.92576	1.92773
37737	15.62	0.19343	2.992				7.98712	1.93624
37937	15.64	0.19453	2.991				7.99734	1.94725
38137	15.68	0.19561	2.989				8.0178	1.95806
38337	15.72	0.1967	2.989				8.03825	1.96897
38537	15.86	0.19755	2.994				8.10984	1.97748
38737	15.84	0.19866	2.991				8.09961	1.98859
38937	15.98	0.19961	2.992				8.1712	1.9981
39137	16.08	0.20057	2.989				8.22233	2.00771
39337	16.1	0.20147	2.991				8.23256	2.01672
39537	16.22	0.20252	2.991				8.29392	2.02723
39737	16.24	0.20342	2.991				8.30415	2.03624
39937	16.32	0.20429	2.986				8.34505	2.04494
40137	16.4	0.20536	2.993				8.38596	2.05566
40337	16.5	0.20633	2.989				8.4371	2.06537
40537	16.48	0.20723	2.989				8.42687	2.07437
40737	16.56	0.2083	2.991				8.46778	2.08509
40937	16.72	0.20935	2.993				8.54959	2.0956
41137	16.7	0.21036	2.989				8.53936	2.10571
41337	16.8	0.21132	2.985				8.5905	2.11532
41537	16.6	0.21289	2.992				8.48823	2.13103
41737	16.68	0.21376	2.991				8.52914	2.13974
41937	16.72	0.21445	2.99				8.54959	2.14665
42137	16.74	0.21514	2.987				8.55982	2.15355
42337	16.8	0.21602	2.99				8.5905	2.16236
42537	16.98	0.21726	2.991				8.68254	2.17477
42737	17.02	0.21834	2.99				8.70299	2.18559
42937	17	0.21935	2.987				8.69277	2.1957
43137	17.18	0.22029	2.99				8.78481	2.20511
43337	17.26	0.22126	2.987				8.82571	2.21481
43537	17.3	0.22225	2.992				8.84617	2.22472
43737	17.42	0.2233	2.99				8.90753	2.23524
43937	17.48	0.22408	2.989				8.93821	2.24304
44137	17.58	0.22505	2.987				8.98934	2.25275
44337	17.62	0.22603	2.99				9.0098	2.26256
44537	17.76	0.22688	2.989				9.08138	2.27107
44737	17.76	0.22778	2.989				9.08138	2.28008
44937	17.76	0.22878	2.992				9.08138	2.29009
45137	17.92	0.22973	2.989				9.1632	2.2996
45337	17.96	0.23081	2.989				9.18365	2.31041
45537	18.1	0.23157	2.99				9.25524	2.31802
45737	18.14	0.23265	2.989				9.27569	2.32883
45937	18.24	0.23362	2.987				9.32683	2.33854
46137	18.36	0.23467	2.991				9.38819	2.34905
46337	18.38	0.23567	2.988				9.39841	2.35906
46537	18.42	0.23675	2.989				9.41887	2.36987
46737	18.44	0.23765	2.987				9.42909	2.37888
46937	18.56	0.2385	2.991				9.49045	2.38739
47137	18.62	0.23958	2.993				9.52113	2.3982
47337	18.72	0.24055	2.99				9.57227	2.40791
47537	18.76	0.24153	2.99				9.59272	2.41772
47737	18.8	0.24242	2.991				9.61318	2.42663
47937	18.86	0.2435	2.992				9.64386	2.43744
48137	19.04	0.24444	2.991				9.7359	2.44685
48337	19.02	0.24544	2.991				9.72567	2.45686
48537	19.18	0.24659	2.992				9.80748	2.46837
48737	19.24	0.24757	2.991				9.83816	2.47818
48937	19.24	0.24857	2.995				9.83816	2.48819
49137	19.06	0.25113	2.99				9.74612	2.51381
49337	18.32	0.25039	2.993				9.36773	2.50641
49537	18.82	0.25181	2.991				9.6234	2.52062
49737	19.02	0.25184	2.989				9.72567	2.52092
49937	19.46	0.25369	2.99				9.95066	2.53944
50137	19.3	0.25465	2.989				9.86885	2.54905
50337	19.34	0.25523	2.992				9.8893	2.55485
50537	19.46	0.25599	2.988				9.95066	2.56246
50737	19.56	0.25715	2.993				10.0018	2.57407
50937	19.54	0.25816	2.988				9.99157	2.58418
51137	19.66	0.25912	2.988				10.0529	2.59379
51337	19.7	0.26	2.991				10.0734	2.6026
51537	19.9	0.26103	2.993				10.1756	2.61291
51737	19.9	0.26204	2.991				10.1756	2.62302
51937	20.04	0.26299	2.994				10.2472	2.63253
52137	20.08	0.26397	2.993				10.2677	2.64234
52337	20.14	0.26505	2.99				10.2984	2.65315
52537	20.28	0.266	2.99				10.37	2.66266
52737	20.36	0.26687	2.99				10.4109	2.67137
52937	20.52	0.26782	2.993				10.4927	2.68088
53137	20.56	0.2689	2.99				10.5131	2.69169
53337	20.6	0.26979	2.992				10.5336	2.7006
53537	20.68	0.27076	2.989				10.5745	2.71031
53737	20.8	0.27172	2.989				10.6359	2.71992
53937	20.76	0.27273	2.991				10.6154	2.73003
54137	20.84	0.27361	2.989				10.6563	2.73884
54337	20.9	0.27468	2.989				10.687	2.74955
54537	21	0.27565	2.988				10.7381	2.75926
54737	21.1	0.27662	2.991				10.7893	2.76897
54937	21.18	0.27759	2.991				10.8302	2.77868
55137	21.28	0.27855	2.99				10.8813	2.78829
55337	21.34	0.27963	2.99				10.912	2.7991
55537	21.32	0.28054	2.991				10.9018	2.80821
55737	21.44	0.2815	2.989				10.9631	2.81782
55937	21.6	0.28244	2.987				11.0449	2.82723
56137	21.62	0.28343	2.99				11.0552	2.83714
56337	21.66	0.28442	2.989				11.0756	2.84705
56537	21.82	0.28526	2.988				11.1574	2.85546
56737	21.88	0.28624	2.991				11.1881	2.86527
56937	21.84	0.28726	2.99				11.1676	2.87548
57137	22	0.2884	2.989				11.2495	2.88689
57337	22.04	0.28929	2.99				11.2699	2.8958
57537	22.08	0.29027	2.991				11.2904	2.90561
57737	22.28	0.2911	2.989				11.3926	2.91391
57937	22.34	0.29208	2.991				11.4233	2.92372
58137	22.34	0.29308	2.993				11.4233	2.93373
58337	22.44	0.29395	2.991				11.4745	2.94244
58537	22.54	0.29491	2.986				11.5256	2.95205
58737	22.56	0.2959	2.989				11.5358	2.96196
58937	22.66	0.29697	2.988				11.5869	2.97267
59137	22.62	0.29788	2.992				11.5665	2.98178
59337	22.88	0.29889	2.989				11.6994	2.99189
59537	22.88	0.29989	2.988				11.6994	3.0019
59737	22.98	0.30076	2.992				11.7506	3.01061
59937	23.06	0.30173	2.987				11.7915	3.02032
60137	23.16	0.30269	2.989				11.8426	3.02993
60337	23.28	0.30365	2.991				11.904	3.03954
60537	23.28	0.30495	2.992				11.904	3.05255
60737	23.38	0.30582	2.99				11.9551	3.06126
60937	23.46	0.30669	2.991				11.996	3.06997
61137	23.54	0.30776	2.992				12.0369	3.08068
61337	23.6	0.30874	2.989				12.0676	3.09049
61537	23.7	0.30961	2.989				12.1187	3.0992
61737	23.64	0.31063	2.99				12.0881	3.10941
61937	23.76	0.31158	2.99				12.1494	3.11892
62137	23.88	0.31264	2.99				12.2108	3.12953
62337	23.92	0.31353	2.993				12.2312	3.13844
62537	24.02	0.31439	2.991				12.2824	3.14705
62737	24.12	0.31536	2.992				12.3335	3.15676
62937	24.24	0.31642	2.991				12.3949	3.16737
63137	24.26	0.31731	2.988				12.4051	3.17628
63337	24.48	0.31823	2.992				12.5176	3.18549
63537	24.52	0.31932	2.992				12.538	3.1964
63737	24.52	0.32032	2.992				12.538	3.20641
63937	24.6	0.32129	2.991				12.5789	3.21612
64137	24.66	0.32237	2.993				12.6096	3.22693
64337	24.82	0.32341	2.991				12.6914	3.23734
64537	24.7	0.32466	2.992				12.6301	3.24985
64737	24.88	0.32549	2.991				12.7221	3.25816
64937	25	0.32635	2.992				12.7835	3.26677
65137	25.1	0.32732	2.991				12.8346	3.27648
65337	25.14	0.3283	2.991				12.8551	3.28629
65537	25.18	0.32929	2.99				12.8755	3.2962
65737	25.26	0.33036	2.992				12.9164	3.30691
65937	25.42	0.3311	2.99				12.9982	3.31431
66137	25.4	0.33221	2.987				12.988	3.32543
66337	25.56	0.33305	2.99				13.0698	3.33383
66537	25.52	0.33407	2.989				13.0494	3.34404
66737	25.58	0.33485	2.993				13.0801	3.35185
66937	25.76	0.33578	2.995				13.1721	3.36116
67137	25.78	0.33688	2.991				13.1823	3.37217
67337	25.94	0.33782	2.989				13.2641	3.38158
67537	25.98	0.33871	2.989				13.2846	3.39049
67737	26.04	0.33979	2.992				13.3153	3.4013
67937	26.14	0.34075	2.991				13.3664	3.41091
68137	26.24	0.34172	2.991				13.4175	3.42062
68337	26.28	0.3431	2.991				13.438	3.43443
68537	26.32	0.34409	2.987				13.4584	3.44434
68737	26.28	0.345	2.989				13.438	3.45345
68937	26.48	0.34603	2.989				13.5403	3.46376
69137	26.5	0.34693	2.992				13.5505	3.47277
69337	26.56	0.3478	2.991				13.5812	3.48148
69537	26.62	0.34868	2.991				13.6118	3.49029
69737	26.66	0.34967	2.99				13.6323	3.5002
69937	26.8	0.35052	2.989				13.7039	3.50871
70137	26.86	0.3515	2.989				13.7346	3.51852
70337	26.92	0.35238	2.987				13.7652	3.52733
70537	27.06	0.35323	2.993				13.8368	3.53584
70737	27.14	0.3544	2.99				13.8777	3.54755
70937	27.22	0.35547	2.988				13.9187	3.55826
71137	27.3	0.35634	2.991				13.9596	3.56697
71337	27.48	0.35728	2.992				14.0516	3.57638
71537	27.54	0.35826	2.99				14.0823	3.58619
71737	27.6	0.35914	2.989				14.113	3.59499
71937	27.76	0.36018	2.989				14.1948	3.60541
72137	27.7	0.36111	2.992				14.1641	3.61471
72337	27.62	0.36273	2.991				14.1232	3.63093
72537	27.62	0.36273	2.991				14.1232	3.63093
72737	26.86	0.364	2.991				13.7346	3.64364
72937	27.22	0.36607	2.989				13.9187	3.66436
73137	27.22	0.36607	2.989				13.9187	3.66436
73337	27.22	0.36607	2.989				13.9187	3.66436
73537	27.26	0.36836	2.992				13.9391	3.68729
73737	27.92	0.36913	2.989				14.2766	3.69499
73937	28.08	0.37057	2.986				14.3584	3.70941
74137	28.2	0.37193	2.99				14.4198	3.72302
74337	28.08	0.37247	2.99				14.3584	3.72843
74537	28.06	0.37318	2.989				14.3482	3.73554
74737	28.26	0.37391	2.992				14.4504	3.74284
74937	28.18	0.37504	2.99				14.4095	3.75415
75137	28.38	0.37597	2.988				14.5118	3.76346
75337	28.44	0.37705	2.988				14.5425	3.77427
75537	28.5	0.37813	2.987				14.5732	3.78509
75737	28.56	0.3793	2.99				14.6038	3.7968
75937	28.7	0.38016	2.989				14.6754	3.80541
76137	28.7	0.38106	2.989				14.6754	3.81441
76337	28.84	0.38191	2.989				14.747	3.82292
76537	28.94	0.38287	2.992				14.7982	3.83253
76737	28.94	0.38387	2.99				14.7982	3.84254
76937	29.06	0.38483	2.992				14.8595	3.85215
77137	29.12	0.38571	2.987				14.8902	3.86096
77337	29.36	0.38652	2.994				15.0129	3.86907
77537	29.44	0.3876	2.986				15.0538	3.87988
77737	29.5	0.38848	2.995				15.0845	3.88869
77937	29.66	0.38942	2.991				15.1663	3.8981
78137	29.72	0.3906	2.991				15.197	3.90991
78337	29.66	0.39162	2.991				15.1663	3.92012
78537	29.76	0.39258	2.988				15.2175	3.92973
78737	29.9	0.39344	2.991				15.289	3.93834
78937	29.98	0.39451	2.992				15.3299	3.94905
79137	30.04	0.39539	2.987				15.3606	3.95786
79337	30.2	0.39633	2.994				15.4424	3.96727
79537	30.24	0.39722	2.991				15.4629	3.97618
79737	30.24	0.39822	2.989				15.4629	3.98619
79937	30.36	0.39917	2.994				15.5243	3.9957
80137	30.46	0.40004	2.989				15.5754	4.0044
80337	30.54	0.40101	2.992				15.6163	4.01411
80537	30.62	0.40208	2.989				15.6572	4.02482
80737	30.72	0.40315	2.993				15.7083	4.03554
80937	30.8	0.40402	2.99				15.7492	4.04424
81137	30.82	0.40511	2.993				15.7595	4.05516
81337	30.9	0.40609	2.989				15.8004	4.06496
81537	30.96	0.40706	2.989				15.8311	4.07467
81737	31.08	0.40812	2.989				15.8924	4.08529
81937	31.08	0.40902	2.989				15.8924	4.09429
82137	31.1	0.41002	2.99				15.9026	4.1043
82337	31.26	0.41086	2.992				15.9845	4.11271
82537	31.34	0.41183	2.989				16.0254	4.12242
82737	31.36	0.41282	2.99				16.0356	4.13233
82937	31.46	0.41369	2.99				16.0867	4.14104
83137	31.58	0.41485	2.989				16.1481	4.15265
83337	31.52	0.41577	2.994				16.1174	4.16186
83537	31.7	0.41681	2.986				16.2095	4.17227
83737	31.74	0.41789	2.995				16.2299	4.18308
83937	31.76	0.41878	2.991				16.2401	4.19199
84137	31.8	0.41967	2.988				16.2606	4.2009
84337	31.84	0.42076	2.989				16.281	4.21181
84537	32.02	0.42149	2.994				16.3731	4.21912
84737	32.08	0.42257	2.987				16.4038	4.22993
84937	32.16	0.42344	2.99				16.4447	4.23864
85137	32.2	0.42453	2.99				16.4651	4.24955
85337	32.4	0.42546	2.99				16.5674	4.25886
85537	32.54	0.42651	2.986				16.639	4.26937
85737	32.52	0.42752	2.99				16.6287	4.27948
85937	32.7	0.42856	2.988				16.7208	4.28989
86137	32.78	0.42963	2.991				16.7617	4.3006
86337	32.82	0.43061	2.994				16.7822	4.31041
86537	32.96	0.43156	2.989				16.8537	4.31992
86737	33.14	0.4325	2.987				16.9458	4.32933
86937	33.26	0.43346	2.991				17.0071	4.33894
87137	33.3	0.43445	2.993				17.0276	4.34885
87337	33.3	0.43535	2.99				17.0276	4.35786
87537	33.36	0.43622	2.993				17.0583	4.36657
87737	33.34	0.43713	2.992				17.048	4.37568
87937	33.46	0.43809	2.99				17.1094	4.38529
88137	33.52	0.43897	2.989				17.1401	4.39409
88337	33.64	0.44003	2.993				17.2014	4.4047
88537	33.8	0.44097	2.991				17.2833	4.41411
88737	33.88	0.44204	2.988				17.3242	4.42482
88937	33.96	0.44291	2.992				17.3651	4.43353
89137	33.98	0.44391	2.99				17.3753	4.44354
89337	34.08	0.44497	2.99				17.4264	4.45415
89537	34.18	0.44594	2.993				17.4776	4.46386
89737	34.18	0.44684	2.989				17.4776	4.47287
89937	34.24	0.44792	2.988				17.5083	4.48368
90137	34.4	0.44896	2.992				17.5901	4.49409
90337	34.38	0.44977	2.99				17.5798	4.5022
90537	34.44	0.45095	2.989				17.6105	4.51401
90737	34.6	0.45179	2.99				17.6923	4.52242
90937	34.72	0.45265	2.993				17.7537	4.53103
91137	34.76	0.45353	2.988				17.7741	4.53984
91337	34.82	0.45451	2.994				17.8048	4.54965
91537	34.9	0.45569	2.991				17.8457	4.56146
91737	34.88	0.45659	2.993				17.8355	4.57047
91937	35.04	0.45764	2.991				17.9173	4.58098
92137	35.02	0.45844	2.989				17.9071	4.58899
92337	35.12	0.45941	2.991				17.9582	4.5987
92537	35.22	0.46037	2.989				18.0094	4.60831
92737	35.42	0.4614	2.992				18.1116	4.61862
92937	35.54	0.46216	2.99				18.173	4.62623
93137	35.6	0.46324	2.988				18.2037	4.63704
93337	35.64	0.46413	2.99				18.2241	4.64595
93537	35.74	0.46509	2.991				18.2753	4.65556
93737	35.82	0.46616	2.99				18.3162	4.66627
93937	35.84	0.46726	2.993				18.3264	4.67728
94137	35.88	0.46824	2.993				18.3468	4.68709
94337	35.84	0.46926	2.987				18.3264	4.6973
94537	35.96	0.47021	2.989				18.3878	4.70681
94737	35.98	0.47101	2.99				18.398	4.71481
94937	36.18	0.47204	2.991				18.5002	4.72513
95137	36.26	0.47291	2.992				18.5412	4.73383
95337	36.32	0.47409	2.993				18.5718	4.74565
95537	36.4	0.47526	2.992				18.6127	4.75736
95737	36.5	0.47613	2.989				18.6639	4.76607
95937	36.62	0.47728	2.993				18.7252	4.77758
96137	36.56	0.4784	2.989				18.6946	4.78879
96337	36.52	0.47952	2.991				18.6741	4.8
96537	36.68	0.48036	2.992				18.7559	4.80841
96737	36.82	0.48131	2.991				18.8275	4.81792
96937	36.82	0.48231	2.99				18.8275	4.82793
97137	36.92	0.48328	2.989				18.8786	4.83764
97337	36.98	0.48416	2.994				18.9093	4.84645
97537	37.08	0.48502	2.993				18.9605	4.85506
97737	37.14	0.4862	2.99				18.9911	4.86687
97937	37.28	0.48695	2.989				19.0627	4.87437
98137	37.36	0.48792	2.989				19.1036	4.88408
98337	37.44	0.4889	2.992				19.1445	4.89389
98537	37.52	0.48977	2.989				19.1854	4.9026
98737	37.5	0.49077	2.99				19.1752	4.91261
98937	37.7	0.49161	2.99				19.2775	4.92102
99137	37.76	0.49268	2.992				19.3082	4.93173
99337	37.84	0.49366	2.992				19.3491	4.94154
99537	37.94	0.49462	2.99				19.4002	4.95115
99737	38	0.4956	2.989				19.4309	4.96096
99937	38.1	0.49657	2.988				19.482	4.97067
100137	38.22	0.49752	2.992				19.5434	4.98018
100337	38.38	0.49847	2.99				19.6252	4.98969
100537	38.42	0.49945	2.991				19.6456	4.9995
100737	38.46	0.50054	2.99				19.6661	5.01041
100937	38.46	0.50154	2.989				19.6661	5.02042
101137	38.58	0.5025	2.989				19.7275	5.03003
101337	38.6	0.50359	2.99				19.7377	5.04094
101537	38.56	0.5048	2.99				19.7172	5.05305
101737	38.64	0.50558	2.988				19.7581	5.06086
101937	38.78	0.50653	2.989				19.8297	5.07037
102137	38.82	0.50741	2.991				19.8502	5.07918
102337	38.88	0.50819	2.987				19.8809	5.08699
102537	39	0.50905	2.99				19.9422	5.0956
102737	39.12	0.51001	2.994				20.0036	5.10521
102937	39.14	0.511	2.989				20.0138	5.11512
103137	39.22	0.51187	2.989				20.0547	5.12382
103337	39.32	0.51284	2.99				20.1059	5.13353
103537	39.32	0.51394	2.991				20.1059	5.14454
103737	39.44	0.5149	2.991				20.1672	5.15415
103937	39.66	0.51582	2.987				20.2797	5.16336
104137	39.78	0.51688	2.989				20.3411	5.17397
104337	39.74	0.51769	2.989				20.3206	5.18208
104537	39.92	0.51873	2.99				20.4127	5.19249
104737	39.94	0.51972	2.989				20.4229	5.2024
104937	39.98	0.52071	2.988				20.4433	5.21231
105137	40.08	0.52177	2.99				20.4945	5.22292
105337	40.26	0.52271	2.99				20.5865	5.23233
105537	40.36	0.52367	2.987				20.6376	5.24194
105737	40.34	0.52468	2.991				20.6274	5.25205
105937	40.36	0.52577	2.99				20.6376	5.26296
106137	40.5	0.52653	2.989				20.7092	5.27057
106337	40.64	0.52768	2.991				20.7808	5.28208
106537	40.68	0.52866	2.989				20.8013	5.29189
106737	40.72	0.52955	2.988				20.8217	5.3008
106937	40.78	0.53063	2.989				20.8524	5.31161
107137	40.86	0.5316	2.989				20.8933	5.32132
107337	40.9	0.53249	2.991				20.9138	5.33023
107537	40.96	0.53346	2.989				20.9445	5.33994
107737	41.06	0.53443	2.986				20.9956	5.34965
107937	41.16	0.53529	2.989				21.0467	5.35826
108137	41.26	0.53626	2.991				21.0979	5.36797
108337	41.44	0.5371	2.99				21.1899	5.37638
108537	41.48	0.53818	2.991				21.2103	5.38719
108737	41.56	0.53915	2.988				21.2513	5.3969
108937	41.52	0.54017	2.992				21.2308	5.40711
109137	40.88	0.54239	2.992				20.9035	5.42933
109337	40.88	0.54239	2.992				20.9035	5.42933
109537	40.98	0.54306	2.989				20.9547	5.43604
109737	41.32	0.54464	2.993				21.1285	5.45185
109937	41.44	0.5459	2.99				21.1899	5.46446
110137	41.42	0.547	2.989				21.1797	5.47548
110337	41.44	0.5478	2.994				21.1899	5.48348
110537	41.5	0.54858	2.989				21.2206	5.49129
110737	41.54	0.54946	2.989				21.241	5.5001
110937	41.76	0.55018	2.99				21.3535	5.50731
111137	41.96	0.55111	2.992				21.4558	5.51662
111337	41.92	0.55223	2.99				21.4353	5.52783
111537	42.06	0.55308	2.992				21.5069	5.53634
111737	42.04	0.55419	2.992				21.4967	5.54745
111937	42.1	0.55507	2.989				21.5274	5.55626
112137	42.2	0.55603	2.989				21.5785	5.56587
112337	42.32	0.55699	2.99				21.6399	5.57548
112537	42.4	0.55786	2.993				21.6808	5.58418
112737	42.46	0.55914	2.991				21.7115	5.597
112937	42.3	0.5604	2.989				21.6296	5.60961
113137	42.18	0.56174	2.989				21.5683	5.62302
113337	42.14	0.56265	2.99				21.5478	5.63213
113537	42.14	0.56345	2.992				21.5478	5.64014
113737	42.1	0.56427	2.993				21.5274	5.64835
113937	42.16	0.56504	2.991				21.5581	5.65606
114137	42.28	0.5659	2.988				21.6194	5.66466
114337	42.36	0.56687	2.993				21.6603	5.67437
114537	42.54	0.56791	2.991				21.7524	5.68478
114737	42.6	0.56879	2.991				21.783	5.69359
114937	42.66	0.56997	2.987				21.8137	5.70541
115137	42.7	0.57076	2.991				21.8342	5.71331
115337	42.88	0.57169	2.991				21.9262	5.72262
115537	42.9	0.57269	2.991				21.9364	5.73263
115737	43.04	0.57354	2.992				22.008	5.74114
115937	43.08	0.57462	2.989				22.0285	5.75195
116137	43.26	0.57536	2.992				22.1205	5.75936
116337	43.46	0.57659	2.99				22.2228	5.77167
116537	43.44	0.5776	2.989				22.2126	5.78178
116737	43.62	0.57853	2.993				22.3046	5.79109
116937	43.62	0.57963	2.989				22.3046	5.8021
117137	43.7	0.5806	2.991				22.3455	5.81181
117337	43.72	0.5817	2.989				22.3557	5.82282
117537	43.8	0.58267	2.993				22.3967	5.83253
117737	43.88	0.58364	2.991				22.4376	5.84224
117937	43.9	0.58454	2.991				22.4478	5.85125
118137	43.88	0.58554	2.99				22.4376	5.86126
118337	44.02	0.58639	2.989				22.5091	5.86977
118537	44.08	0.58747	2.987				22.5398	5.88058
118737	44.1	0.58847	2.989				22.5501	5.89059
118937	44.18	0.58944	2.993				22.591	5.9003
119137	44.1	0.59067	2.986				22.5501	5.91261
119337	44.16	0.59154	2.987				22.5807	5.92132
119537	44.3	0.5925	2.99				22.6523	5.93093
119737	44.32	0.59349	2.99				22.6626	5.94084
119937	44.36	0.59437	2.991				22.683	5.94965
120137	44.58	0.5953	2.989				22.7955	5.95896
120337	44.5	0.59623	2.99				22.7546	5.96827
120537	44.68	0.59706	2.991				22.8466	5.97658
120737	44.7	0.59795	2.988				22.8569	5.98549
120937	44.82	0.59891	2.993				22.9182	5.9951
121137	44.84	0.60001	2.987				22.9284	6.00611
121337	44.96	0.60076	2.989				22.9898	6.01361
121537	45.02	0.60194	2.992				23.0205	6.02543
121737	45.04	0.60284	2.993				23.0307	6.03443
121937	45.16	0.60379	2.988				23.0921	6.04394
122137	45.22	0.60487	2.99				23.1228	6.05475
122337	45.34	0.60583	2.991				23.1841	6.06436
122537	45.48	0.60668	2.991				23.2557	6.07287
122737	45.44	0.6079	2.99				23.2353	6.08509
122937	45.56	0.60895	2.991				23.2966	6.0956
123137	45.64	0.61003	2.992				23.3375	6.10641
123337	45.72	0.6109	2.993				23.3784	6.11512
123537	45.8	0.61187	2.988				23.4193	6.12482
123737	46.04	0.61269	2.989				23.5421	6.13303
123937	46	0.6137	2.995				23.5216	6.14314
124137	46.06	0.61468	2.989				23.5523	6.15295
124337	46.1	0.61577	2.992				23.5727	6.16386
124537	46.04	0.61679	2.989				23.5421	6.17407
124737	46.16	0.61774	2.989				23.6034	6.18358
124937	46.4	0.61866	2.989				23.7261	6.19279
125137	46.3	0.61959	2.992				23.675	6.2021
125337	46.5	0.62053	2.992				23.7773	6.21151
125537	46.46	0.62154	2.989				23.7568	6.22162
125737	46.64	0.62248	2.993				23.8489	6.23103
125937	46.62	0.62348	2.99				23.8386	6.24104
126137	46.66	0.62467	2.993				23.8591	6.25295
126337	46.74	0.62554	2.988				23.9	6.26166
126537	46.8	0.62652	2.992				23.9307	6.27147
126737	46.88	0.62749	2.99				23.9716	6.28118
126937	47.02	0.62854	2.988				24.0432	6.29169
127137	46.9	0.62949	2.994				23.9818	6.3012
127337	47.08	0.63052	2.991				24.0738	6.31151
127537	47.22	0.63147	2.991				24.1454	6.32102
127737	47.2	0.63228	2.994				24.1352	6.32913
127937	47.3	0.63314	2.991				24.1863	6.33774
128137	47.36	0.63412	2.99				24.217	6.34755
128337	47.44	0.6352	2.994				24.2579	6.35836
128537	47.6	0.63604	2.991				24.3397	6.36677
128737	47.6	0.63704	2.991				24.3397	6.37678
128937	47.78	0.63798	2.992				24.4318	6.38619
129137	47.88	0.63894	2.993				24.4829	6.3958
129337	47.9	0.63994	2.99				24.4931	6.40581
129537	47.96	0.64101	2.993				24.5238	6.41652
129738	48.04	0.64209	2.989				24.5647	6.42733
129939	48.02	0.64299	2.991				24.5545	6.43634
130140	48.04	0.64409	2.989				24.5647	6.44735
130341	48.04	0.64529	2.991				24.5647	6.45936
130541	48.06	0.64628	2.991				24.575	6.46927
130741	48.02	0.64719	2.991				24.5545	6.47838
130941	48.12	0.64806	2.99				24.6056	6.48709
131141	48.24	0.64892	2.991				24.667	6.4957
131341	48.28	0.6497	2.989				24.6875	6.5035
131541	48.34	0.65068	2.99				24.7181	6.51331
131741	48.4	0.65156	2.991				24.7488	6.52212
131941	48.58	0.6526	2.99				24.8409	6.53253
132141	48.58	0.6535	2.988				24.8409	6.54154
132341	48.7	0.65465	2.992				24.9022	6.55305
132541	48.86	0.6555	2.99				24.984	6.56156
132741	48.86	0.6566	2.992				24.984	6.57257
132941	49.08	0.65742	2.992				25.0965	6.58078
133141	49.1	0.65862	2.991				25.1068	6.59279
133341	49.12	0.65951	2.992				25.117	6.6017
133541	49.24	0.66047	2.989				25.1783	6.61131
133741	49.36	0.66132	2.991				25.2397	6.61982
133941	49.3	0.66255	2.991				25.209	6.63213
134141	49.46	0.66339	2.991				25.2908	6.64054
134341	49.54	0.66436	2.992				25.3317	6.65025
134541	49.62	0.66533	2.99				25.3726	6.65996
134741	49.72	0.6664	2.989				25.4238	6.67067
134941	49.78	0.66748	2.993				25.4545	6.68148
135141	49.68	0.66851	2.991				25.4033	6.69179
135341	49.72	0.6696	2.991				25.4238	6.7027
135541	49.78	0.67058	2.989				25.4545	6.71251
135741	49.86	0.67155	2.991				25.4954	6.72222
135941	49.88	0.67244	2.993				25.5056	6.73113
136141	49.96	0.67321	2.992				25.5465	6.73884
136341	50.02	0.67419	2.99				25.5772	6.74865
136541	50.06	0.67518	2.988				25.5976	6.75856
136741	50.18	0.67624	2.991				25.659	6.76917
136941	50.34	0.67718	2.993				25.7408	6.77858
137141	50.44	0.67815	2.988				25.7919	6.78829
137341	50.48	0.67913	2.989				25.8124	6.7981
137641	50.58	0.6806	2.992				25.8635	6.81281
137841	50.62	0.68168	2.991				25.884	6.82362
138041	50.8	0.68262	2.99				25.976	6.83303
138241	50.86	0.6835	2.99				26.0067	6.84184
138441	50.82	0.68461	2.992				25.9863	6.85295
138641	50.84	0.68561	2.993				25.9965	6.86296
138841	50.88	0.68669	2.99				26.0169	6.87377
139041	51.02	0.68744	2.993				26.0885	6.88128
139241	51.02	0.68854	2.992				26.0885	6.89229
139441	51.14	0.6894	2.99				26.1499	6.9009
139641	51.22	0.69037	2.989				26.1908	6.91061
139841	51.32	0.69124	2.993				26.2419	6.91932
140041	51.28	0.69235	2.989				26.2215	6.93043
140241	51.34	0.69323	2.989				26.2522	6.93924
140441	51.4	0.69421	2.99				26.2828	6.94905
140641	51.42	0.6952	2.99				26.2931	6.95896
140841	51.48	0.69608	2.989				26.3237	6.96777
141041	51.52	0.69697	2.989				26.3442	6.97668
141241	51.6	0.69794	2.987				26.3851	6.98639
141441	51.76	0.69898	2.989				26.4669	6.9968
141641	51.74	0.69989	2.991				26.4567	7.00591
141841	51.86	0.70085	2.988				26.518	7.01552
142041	52.02	0.70199	2.991				26.5999	7.02693
142241	51.92	0.70303	2.988				26.5487	7.03734
142441	51.96	0.70431	2.99				26.5692	7.05015
142641	51.84	0.70536	2.989				26.5078	7.06066
142841	51.98	0.70641	2.992				26.5794	7.07117
143041	51.94	0.70742	2.989				26.559	7.08128
143241	52	0.7082	2.988				26.5896	7.08909
143441	52	0.7092	2.99				26.5896	7.0991
143641	52.22	0.70982	2.988				26.7021	7.10531
143841	52.08	0.71087	2.99				26.6305	7.11582
144041	52.18	0.71174	2.987				26.6817	7.12452
144241	52.36	0.71267	2.991				26.7737	7.13383
144441	52.3	0.714	2.986				26.743	7.14715
144641	52.28	0.7152	2.988				26.7328	7.15916
144841	52.34	0.71618	2.99				26.7635	7.16897
145041	52.3	0.71729	2.988				26.743	7.18008
145241	52.3	0.7185	2.99				26.743	7.19219
145441	52.32	0.71939	2.989				26.7533	7.2011
145641	52.36	0.72037	2.992				26.7737	7.21091
145841	52.38	0.72117	2.989				26.7839	7.21892
146041	52.44	0.72215	2.989				26.8146	7.22873
146241	52.54	0.72291	2.987				26.8658	7.23634
146441	52.52	0.72362	2.988				26.8555	7.24344
146641	52.6	0.72469	2.99				26.8964	7.25415
146841	52.76	0.72563	2.99				26.9783	7.26356
147041	52.78	0.72663	2.99				26.9885	7.27357
147241	52.82	0.72751	2.99				27.0089	7.28238
147441	53.02	0.72854	2.993				27.1112	7.29269
147641	53.16	0.72949	2.985				27.1828	7.3022
147841	53.22	0.73047	2.988				27.2135	7.31201
148041	53.32	0.73144	2.987				27.2646	7.32172
148241	53.38	0.73242	2.989				27.2953	7.33153
148441	53.52	0.73337	2.991				27.3669	7.34104
148641	53.62	0.73433	2.989				27.418	7.35065
148841	53.66	0.73532	2.99				27.4385	7.36056
149041	53.72	0.7364	2.988				27.4691	7.37137
149241	53.84	0.73736	2.992				27.5305	7.38098
149441	53.92	0.73833	2.99				27.5714	7.39069
149641	54	0.7395	2.99				27.6123	7.4024
149841	54.02	0.74039	2.987				27.6225	7.41131
150041	53.98	0.74131	2.99				27.6021	7.42052
150241	54.02	0.74249	2.99				27.6225	7.43233
150441	54.22	0.74332	2.991				27.7248	7.44064
150641	54.16	0.74424	2.989				27.6941	7.44985
150841	54.34	0.74518	2.988				27.7862	7.45926
151041	54.38	0.74607	2.988				27.8066	7.46817
151241	54.4	0.74696	2.99				27.8168	7.47708
151441	54.52	0.74802	2.991				27.8782	7.48769
151641	54.66	0.74887	2.993				27.9498	7.4962
151841	54.66	0.74997	2.99				27.9498	7.50721
152041	54.88	0.75079	2.989				28.0623	7.51542
152241	54.88	0.75169	2.988				28.0623	7.52442
152441	54.96	0.75266	2.988				28.1032	7.53413
152641	55.04	0.75364	2.991				28.1441	7.54394
152841	55.14	0.7546	2.987				28.1952	7.55355
153041	55.24	0.75587	2.99				28.2464	7.56627
153241	55.32	0.75684	2.988				28.2873	7.57598
153441	55.28	0.75785	2.989				28.2668	7.58609
153641	55.36	0.75902	2.989				28.3077	7.5978
153841	55.38	0.76012	2.991				28.318	7.60881
154041	55.58	0.76105	2.989				28.4202	7.61812
154241	55.54	0.76206	2.987				28.3998	7.62823
154441	55.72	0.763	2.988				28.4918	7.63764
154641	55.56	0.76405	2.989				28.41	7.64815
154841	55.76	0.76498	2.994				28.5123	7.65746
155041	55.8	0.76587	2.989				28.5327	7.66637
155241	55.8	0.76677	2.989				28.5327	7.67538
155441	55.9	0.76784	2.99				28.5839	7.68609
155641	55.92	0.76883	2.988				28.5941	7.696
155841	55.98	0.76971	2.99				28.6248	7.7048
156041	56.06	0.77078	2.99				28.6657	7.71552
156241	56.1	0.77176	2.988				28.6861	7.72533
156441	56.2	0.77273	2.991				28.7373	7.73504
156641	56.2	0.77353	2.989				28.7373	7.74304
156841	56.22	0.77462	2.987				28.7475	7.75395
157041	56.3	0.7756	2.993				28.7884	7.76376
157241	56.44	0.77645	2.988				28.86	7.77227
157441	56.44	0.77745	2.988				28.86	7.78228
157641	56.58	0.7784	2.99				28.9316	7.79179
157841	56.54	0.77941	2.989				28.9111	7.8019
158041	56.74	0.78034	2.989				29.0134	7.81121
158241	56.72	0.78115	2.99				29.0032	7.81932
158441	56.8	0.78222	2.989				29.0441	7.83003
158641	56.78	0.78333	2.991				29.0338	7.84114
158841	56.84	0.78431	2.989				29.0645	7.85095
159041	57	0.78505	2.99				29.1463	7.85836
159241	57.06	0.78613	2.988				29.177	7.86917
159441	57.04	0.78714	2.99				29.1668	7.87928
159641	57.16	0.78809	2.991				29.2281	7.88879
159841	57.26	0.78916	2.988				29.2793	7.8995
160041	57.36	0.79012	2.989				29.3304	7.90911
160241	57.4	0.79131	2.989				29.3509	7.92102
160441	57.56	0.79225	2.992				29.4327	7.93043
160641	57.48	0.79338	2.986				29.3918	7.94174
160841	57.46	0.79449	2.986				29.3815	7.95285
161041	57.48	0.79548	2.99				29.3918	7.96276
161241	57.46	0.79639	2.989				29.3815	7.97187
161441	57.54	0.79746	2.988				29.4225	7.98258
161641	57.64	0.79823	2.99				29.4736	7.99029
161841	57.66	0.79912	2.984				29.4838	7.9992
162041	57.76	0.80018	2.994				29.5349	8.00981
162241	57.88	0.80104	2.989				29.5963	8.01842
162441	57.88	0.80194	2.99				29.5963	8.02743
162641	57.94	0.80292	2.988				29.627	8.03724
162841	58.02	0.80389	2.989				29.6679	8.04695
163041	58.18	0.80484	2.992				29.7497	8.05646
163241	58.28	0.8059	2.991				29.8008	8.06707
163441	58.24	0.80702	2.989				29.7804	8.07828
163641	58.32	0.80799	2.99				29.8213	8.08799
163841	58.34	0.80898	2.991				29.8315	8.0979
164041	58.4	0.80976	2.99				29.8622	8.10571
164241	58.56	0.8108	2.988				29.944	8.11612
164441	58.64	0.81178	2.991				29.9849	8.12593
164641	58.66	0.81277	2.987				29.9952	8.13584
164841	58.68	0.81376	2.99				30.0054	8.14575
165041	58.76	0.81473	2.993				30.0463	8.15546
165241	58.82	0.81571	2.99				30.077	8.16527
165441	58.9	0.81689	2.991				30.1179	8.17708
165641	59	0.81795	2.989				30.169	8.18769
165841	58.96	0.81886	2.991				30.1486	8.1968
166041	59	0.81985	2.986				30.169	8.20671
166241	58.92	0.82088	2.989				30.1281	8.21702
166441	59	0.82185	2.99				30.169	8.22673
166641	58.94	0.82287	2.989				30.1383	8.23694
166841	58.9	0.82389	2.991				30.1179	8.24715
167041	59.02	0.82484	2.988				30.1792	8.25666
167241	58.98	0.82576	2.988				30.1588	8.26587
167441	59.02	0.82664	2.992				30.1792	8.27467
167641	58.74	0.82814	2.99				30.0361	8.28969
167841	58.18	0.82974	2.986				29.7497	8.30571
168041	57.08	0.83052	2.987				29.1872	8.31351
168241	57.4	0.83071	2.985				29.3509	8.31542
168441	58.1	0.83176	2.992				29.7088	8.32593
168641	58.22	0.83292	2.99				29.7702	8.33754
168841	58.38	0.83397	2.988				29.852	8.34805
169041	58.48	0.83493	2.994				29.9031	8.35766
169241	58.56	0.836	2.991				29.944	8.36837
169441	58.72	0.83695	2.988				30.0258	8.37788
169641	58.74	0.83794	2.988				30.0361	8.38779
169841	58.86	0.8388	2.985				30.0974	8.3964
170041	58.96	0.83986	2.99				30.1486	8.40701
170241	59.06	0.84083	2.991				30.1997	8.41672
170441	59.12	0.84161	2.987				30.2304	8.42452
170641	59.12	0.84271	2.989				30.2304	8.43554
170841	59.4	0.84361	2.992				30.3735	8.44454
171041	59.44	0.8445	2.988				30.394	8.45345
171241	59.56	0.84545	2.989				30.4554	8.46296
171441	59.5	0.84648	2.99				30.4247	8.47327
171641	59.64	0.84753	2.986				30.4963	8.48378
171841	59.7	0.84841	2.991				30.5269	8.49259
172041	59.74	0.84929	2.99				30.5474	8.5014
172241	59.84	0.85036	2.988				30.5985	8.51211
172441	59.8	0.85137	2.99				30.5781	8.52222
172641	59.84	0.85226	2.988				30.5985	8.53113
172841	59.92	0.85323	2.987				30.6394	8.54084
173041	60.04	0.85429	2.989				30.7008	8.55145
173241	59.98	0.85531	2.989				30.6701	8.56166
173441	60.12	0.85626	2.987				30.7417	8.57117
173641	60.16	0.85724	2.989				30.7622	8.58098
173841	60.28	0.8581	2.991				30.8235	8.58959
174041	60.24	0.85922	2.991				30.8031	8.6008
174241	60.26	0.86031	2.989				30.8133	8.61171
174441	60.22	0.86152	2.992				30.7928	8.62382
174641	60.24	0.86262	2.988				30.8031	8.63483
174841	60.26	0.86371	2.988				30.8133	8.64575
175041	60.22	0.86452	2.988				30.7928	8.65385
175241	60.22	0.86552	2.99				30.7928	8.66386
175441	60.36	0.86637	2.99				30.8644	8.67237
175641	60.32	0.86729	2.992				30.844	8.68158
175841	60.42	0.86815	2.988				30.8951	8.69019
176041	60.42	0.86925	2.99				30.8951	8.7012
176241	60.52	0.87012	2.988				30.9462	8.70991
176441	60.62	0.87098	2.989				30.9974	8.71852
176641	60.7	0.87205	2.989				31.0383	8.72923
176841	60.7	0.87286	2.99				31.0383	8.73734
177041	60.74	0.87394	2.989				31.0587	8.74815
177241	60.82	0.87491	2.988				31.0996	8.75786
177441	60.88	0.87599	2.99				31.1303	8.76867
177641	60.96	0.87696	2.992				31.1712	8.77838
177841	61	0.87795	2.988				31.1917	8.78829
178041	61.06	0.87893	2.989				31.2224	8.7981
178241	61.2	0.87988	2.989				31.294	8.80761
178441	61.34	0.88083	2.989				31.3655	8.81712
178641	61.4	0.88181	2.989				31.3962	8.82693
178841	61.4	0.88291	2.989				31.3962	8.83794
179041	61.54	0.88376	2.989				31.4678	8.84645
179241	61.56	0.88465	2.989				31.478	8.85536
179441	61.56	0.88565	2.99				31.478	8.86537
179641	61.72	0.8865	2.993				31.5599	8.87387
179841	61.74	0.88749	2.989				31.5701	8.88378
180041	61.74	0.88839	2.987				31.5701	8.89279
180241	61.84	0.88936	2.987				31.6212	8.9025
180441	61.92	0.89043	2.991				31.6621	8.91321
180641	61.94	0.89142	2.989				31.6723	8.92312
180841	62.02	0.89219	2.989				31.7133	8.93083
181041	62	0.8933	2.989				31.703	8.94194
181241	62.06	0.89428	2.988				31.7337	8.95175
181441	62.08	0.89537	2.99				31.7439	8.96266
181641	62.04	0.89639	2.991				31.7235	8.97287
181841	62.1	0.89736	2.989				31.7542	8.98258
182041	62.12	0.89836	2.987				31.7644	8.99259
182241	62.2	0.89923	2.988				31.8053	9.0013
182441	62.24	0.90042	2.987				31.8257	9.01321
182641	62.22	0.90122	2.989				31.8155	9.02122
182841	62.34	0.90218	2.989				31.8769	9.03083
183041	62.4	0.90326	2.989				31.9076	9.04164
183241	62.48	0.90423	2.988				31.9485	9.05135
183441	62.44	0.90525	2.992				31.928	9.06156
183641	62.54	0.90621	2.989				31.9791	9.07117
183841	62.52	0.90722	2.989				31.9689	9.08128
184041	62.6	0.90819	2.991				32.0098	9.09099
184241	62.66	0.90917	2.992				32.0405	9.1008
184441	62.8	0.91012	2.99				32.1121	9.11031
184641	62.84	0.91111	2.988				32.1326	9.12022
184841	62.9	0.91219	2.99				32.1632	9.13103
185041	62.98	0.91316	2.99				32.2041	9.14074
185241	63.04	0.91414	2.99				32.2348	9.15055
185441	63.12	0.91511	2.986				32.2757	9.16026
185641	63.14	0.9161	2.991				32.286	9.17017
185841	63.26	0.91686	2.993				32.3473	9.17778
186041	63.32	0.91814	2.989				32.378	9.19059
186241	63.3	0.91895	2.99				32.3678	9.1987
186441	63.36	0.92002	2.993				32.3984	9.20941
186641	63.46	0.92089	2.986				32.4496	9.21812
186841	63.54	0.92186	2.988				32.4905	9.22783
187041	63.56	0.92285	2.991				32.5007	9.23774
187241	63.58	0.92365	2.988				32.5109	9.24575
187441	63.68	0.92461	2.989				32.5621	9.25536
187641	63.72	0.9256	2.99				32.5825	9.26527
187841	63.9	0.92644	2.989				32.6746	9.27367
188041	64	0.9275	2.991				32.7257	9.28428
188241	64.02	0.92849	2.987				32.7359	9.29419
188441	64.1	0.92957	2.992				32.7768	9.30501
188641	64.12	0.93046	2.991				32.7871	9.31391
188841	64.18	0.93164	2.988				32.8177	9.32573
189041	64.14	0.93275	2.991				32.7973	9.33684
189241	64.12	0.93386	2.99				32.7871	9.34795
189441	64.18	0.93474	2.991				32.8177	9.35676
189641	64.24	0.93572	2.99				32.8484	9.36657
189841	64.28	0.9366	2.99				32.8689	9.37538
190041	64.26	0.93761	2.993				32.8587	9.38549
190241	64.42	0.93845	2.991				32.9405	9.39389
190441	64.5	0.93942	2.991				32.9814	9.4036
190641	64.54	0.94041	2.989				33.0018	9.41351
190841	64.54	0.94141	2.991				33.0018	9.42352
191041	64.48	0.94273	2.993				32.9711	9.43674
191241	64.54	0.94391	2.992				33.0018	9.44855
191441	64.52	0.94502	2.987				32.9916	9.45966
191641	64.4	0.94616	2.989				32.9302	9.47107
191841	64.42	0.94725	2.994				32.9405	9.48198
192041	64.38	0.94807	2.989				32.92	9.49019
192241	64.3	0.949	2.988				32.8791	9.4995
192441	64.34	0.94978	2.991				32.8996	9.50731
192641	64.4	0.95056	2.988				32.9302	9.51512
192841	64.46	0.95144	2.986				32.9609	9.52392
193041	64.5	0.95243	2.989				32.9814	9.53383
193241	64.64	0.95338	2.991				33.053	9.54334
193441	64.7	0.95426	2.991				33.0836	9.55215
193641	64.84	0.95531	2.989				33.1552	9.56266
193841	64.86	0.9564	2.989				33.1655	9.57357
194041	64.96	0.95746	2.989				33.2166	9.58418
194241	65.14	0.9583	2.99				33.3086	9.59259
194441	65.18	0.95939	2.99				33.3291	9.6035
194641	65.26	0.96026	2.992				33.37	9.61221
194841	65.28	0.96135	2.986				33.3802	9.62312
195041	65.24	0.96237	2.99				33.3598	9.63333
195241	65.3	0.96355	2.991				33.3904	9.64515
195441	65.28	0.96455	2.99				33.3802	9.65516
195641	65.32	0.96554	2.992				33.4007	9.66507
195841	65.34	0.96643	2.988				33.4109	9.67397
196041	65.34	0.96743	2.991				33.4109	9.68398
196241	65.52	0.96827	2.988				33.5029	9.69239
196441	65.42	0.9693	2.989				33.4518	9.7027
196641	65.52	0.97027	2.99				33.5029	9.71241
196841	65.68	0.97111	2.992				33.5848	9.72082
197041	65.8	0.97207	2.99				33.6461	9.73043
197241	65.68	0.97301	2.99				33.5848	9.73984
197441	65.82	0.97386	2.989				33.6563	9.74835
197641	65.8	0.97487	2.992				33.6461	9.75846
197841	65.92	0.97583	2.989				33.7075	9.76807
198041	65.96	0.97681	2.994				33.7279	9.77788
198241	66.1	0.97787	2.989				33.7995	9.78849
198441	66.18	0.97894	2.99				33.8404	9.7992
198641	66.14	0.98005	2.991				33.82	9.81031
198841	66.24	0.98122	2.99				33.8711	9.82202
199041	66.24	0.98232	2.989				33.8711	9.83303
199241	66.26	0.98341	2.991				33.8813	9.84394
199441	66.18	0.98454	2.99				33.8404	9.85526
199641	66.12	0.98556	2.99				33.8097	9.86547
199841	66.12	0.98656	2.99				33.8097	9.87548
200041	66.02	0.98769	2.992				33.7586	9.88679
200241	65.98	0.98871	2.989				33.7382	9.897
200441	66	0.9894	2.992				33.7484	9.9039
200641	65.96	0.99021	2.991				33.7279	9.91201
200841	65.96	0.99091	2.992				33.7279	9.91902
201041	66.1	0.99186	2.989				33.7995	9.92853
201241	66.16	0.99294	2.991				33.8302	9.93934
201441	66.22	0.99382	2.995				33.8609	9.94815
201641	66.26	0.99491	2.989				33.8813	9.95906
201841	66.34	0.99588	2.988				33.9222	9.96877
202041	66.42	0.99695	2.99				33.9631	9.97948
202241	66.46	0.99804	2.993				33.9836	9.99039
202441	66.4	0.99906	2.992				33.9529	10.0006
202641	66.4	1.00036	2.992				33.9529	10.0136
202841	66.18	1.00174	2.991				33.8404	10.0274
203041	66.18	1.00174	2.991				33.8404	10.0274
203241	66.18	1.00174	2.991				33.8404	10.0274
203441	65.18	1.00499	2.99				33.3291	10.06
203641	65.18	1.00499	2.99				33.3291	10.06
203841	64.86	1.0061	2.99				33.1655	10.0711
204041	65.28	1.00745	2.991				33.3802	10.0846
204241	65.28	1.00885	2.991				33.3802	10.0986
204441	65.22	1.00977	2.991				33.3495	10.1078
204641	65.14	1.0104	2.99				33.3086	10.1141
204841	65.26	1.01106	2.991				33.37	10.1207
205041	65.38	1.01192	2.993				33.4314	10.1293
205241	65.56	1.01305	2.99				33.5234	10.1406
205441	65.74	1.01399	2.99				33.6154	10.1501
205641	65.8	1.01527	2.993				33.6461	10.1629
205841	65.92	1.01633	2.989				33.7075	10.1735
206041	65.96	1.01741	2.991				33.7279	10.1843
206241	65.94	1.01852	2.99				33.7177	10.1954
206441	65.98	1.01941	2.991				33.7382	10.2043
206641	66.1	1.02027	2.99				33.7995	10.2129
206841	66.1	1.02127	2.993				33.7995	10.2229
207041	66.14	1.02225	2.993				33.82	10.2327
207241	66.22	1.02322	2.991				33.8609	10.2424
207441	66.3	1.02409	2.99				33.9018	10.2512
207641	66.32	1.02509	2.991				33.912	10.2612
207841	66.3	1.02619	2.989				33.9018	10.2722
208041	66.38	1.02727	2.988				33.9427	10.283
208241	66.34	1.02838	2.991				33.9222	10.2941
208441	66.28	1.0294	2.991				33.8916	10.3043
208641	66.08	1.03067	2.991				33.7893	10.317
208841	64.98	1.03246	2.992				33.2268	10.3349
209041	64.98	1.03246	2.992				33.2268	10.3349
209241	64.98	1.03246	2.992				33.2268	10.3349
209441	64.24	1.03522	2.988				32.8484	10.3626
209641	64.12	1.03576	2.99				32.7871	10.368
209841	64.32	1.03629	2.99				32.8893	10.3733
210041	64.52	1.03742	2.989				32.9916	10.3846
210241	64.68	1.03846	2.99				33.0734	10.395
210441	64.88	1.03959	2.991				33.1757	10.4063
210641	65.02	1.04054	2.992				33.2473	10.4158
210841	65.02	1.04154	2.992				33.2473	10.4258
211041	65.1	1.04242	2.991				33.2882	10.4346
211241	65.26	1.04356	2.992				33.37	10.446
211441	65.38	1.04442	2.991				33.4314	10.4547
211641	65.48	1.04548	2.991				33.4825	10.4653
211841	65.44	1.0464	2.989				33.462	10.4745
212041	65.62	1.04743	2.988				33.5541	10.4848
212241	65.74	1.04839	2.996				33.6154	10.4944
212441	65.72	1.0494	2.989				33.6052	10.5045
212641	65.68	1.05061	2.989				33.5848	10.5166
212841	65.86	1.05155	2.994				33.6768	10.526
213041	65.96	1.05251	2.989				33.7279	10.5356
213241	65.8	1.05367	2.992				33.6461	10.5472
213441	65.84	1.05456	2.996				33.6666	10.5562
213641	65.82	1.05536	2.99				33.6563	10.5642
213841	65.9	1.05624	2.991				33.6972	10.573
214041	65.92	1.05733	2.988				33.7075	10.5839
214241	65.9	1.05824	2.994				33.6972	10.593
214441	65.92	1.05903	2.99				33.7075	10.6009
214641	65.94	1.06012	2.99				33.7177	10.6118
214841	66.06	1.06098	2.993				33.7791	10.6204
215041	66.1	1.06197	2.989				33.7995	10.6303
215241	66.16	1.06294	2.991				33.8302	10.64
215441	66.2	1.06393	2.993				33.8507	10.6499
215641	66.36	1.06467	2.992				33.9325	10.6574
215841	66.34	1.06568	2.991				33.9222	10.6675
216041	66.32	1.06669	2.99				33.912	10.6776
216241	66.38	1.06797	2.992				33.9427	10.6904
216441	66.48	1.06893	2.993				33.9938	10.7
216641	66.44	1.07015	2.99				33.9734	10.7122
216841	66.48	1.07123	2.989				33.9938	10.723
217041	66.5	1.07222	2.992				34.0041	10.7329
217241	66.36	1.07337	2.991				33.9325	10.7444
217441	66.36	1.07437	2.989				33.9325	10.7545
217641	66.38	1.07527	2.989				33.9427	10.7635
217841	66.16	1.07624	2.993				33.8302	10.7732
218041	66.14	1.07705	2.99				33.82	10.7813
218241	66.24	1.07782	2.994				33.8711	10.789
218441	66.1	1.07887	2.991				33.7995	10.7995
218641	66.24	1.07962	2.991				33.8711	10.807
218841	66.28	1.0807	2.993				33.8916	10.8178
219041	66.24	1.08172	2.989				33.8711	10.828
219241	66.34	1.08278	2.993				33.9222	10.8386
219441	66.24	1.08392	2.99				33.8711	10.8501
219641	66.32	1.08489	2.992				33.912	10.8598
219841	66.24	1.08592	2.989				33.8711	10.8701
220041	66.3	1.08689	2.994				33.9018	10.8798
220241	66.24	1.08792	2.99				33.8711	10.8901
220441	66.24	1.08892	2.991				33.8711	10.9001
220641	66.3	1.08979	2.992				33.9018	10.9088
220841	66.32	1.09079	2.988				33.912	10.9188
221041	66.3	1.09179	2.993				33.9018	10.9288
221241	66.3	1.0928	2.991				33.9018	10.9389
221441	66.28	1.0938	2.993				33.8916	10.9489
221641	66.34	1.09488	2.991				33.9222	10.9598
221841	66.34	1.09588	2.995				33.9222	10.9698
222041	66.3	1.09699	2.993				33.9018	10.9809
222241	66.24	1.09812	2.991				33.8711	10.9922
222441	66.2	1.09913	2.99				33.8507	11.0023
222641	66.22	1.10012	2.991				33.8609	11.0122
222841	66.22	1.10112	2.992				33.8609	11.0222
223041	66.16	1.10224	2.993				33.8302	11.0334
223241	66.14	1.10325	2.991				33.82	11.0435
223441	66.12	1.10426	2.989				33.8097	11.0537
223641	66.02	1.10539	2.987				33.7586	11.065
223841	65.92	1.10633	2.991				33.7075	11.0744
224041	65.96	1.10731	2.991				33.7279	11.0842
224241	65.98	1.10831	2.992				33.7382	11.0942
224441	65.94	1.10912	2.992				33.7177	11.1023
224641	66	1.1101	2.996				33.7484	11.1121
224841	65.92	1.11103	2.99				33.7075	11.1214
225041	65.94	1.11202	2.995				33.7177	11.1313
225241	65.9	1.11304	2.99				33.6972	11.1415
225441	65.86	1.11405	2.993				33.6768	11.1517
225641	65.7	1.11531	2.993				33.595	11.1643
225785	55.56	1.12435	3.022				28.41	11.2548
225985	49.2	1.12368	3.024				25.1579	11.248
226185	46.02	1.12479	2.967				23.5318	11.2592
226385	46.1	1.12607	2.994				23.5727	11.272
226585	46.62	1.12668	2.989				23.8386	11.2781
226785	46.7	1.12815	2.99				23.8795	11.2928
226985	46.5	1.12902	2.994				23.7773	11.3015
227185	46.64	1.12978	2.989				23.8489	11.3091
227385	46.74	1.13074	2.989				23.9	11.3187
227585	46.88	1.13199	2.99				23.9716	11.3312
227785	47.06	1.13303	2.992				24.0636	11.3416
227985	46.98	1.13406	2.989				24.0227	11.352
228185	47.04	1.13494	2.989				24.0534	11.3608
228385	47.1	1.13582	2.99				24.0841	11.3696
228585	47.18	1.13679	2.989				24.125	11.3793
228785	47.22	1.13777	2.989				24.1454	11.3891
228985	47.34	1.13873	2.989				24.2068	11.3987
229185	47.52	1.13957	2.988				24.2988	11.4071
229385	47.5	1.14057	2.99				24.2886	11.4171
229585	47.48	1.14158	2.989				24.2784	11.4272
229785	47.58	1.14265	2.99				24.3295	11.4379
229985	47.6	1.14354	2.991				24.3397	11.4468
230185	47.74	1.14459	2.988				24.4113	11.4574
230385	47.7	1.1455	2.99				24.3909	11.4665
230585	47.76	1.14658	2.992				24.4216	11.4773
230785	47.72	1.1477	2.991				24.4011	11.4885
230985	47.7	1.14871	2.989				24.3909	11.4986
231185	47.68	1.14971	2.99				24.3806	11.5086
231385	47.52	1.15087	2.987				24.2988	11.5202
231585	47.56	1.15185	2.99				24.3193	11.53
231785	47.48	1.15278	2.987				24.2784	11.5393

## Sheet: F-4
Force (large)	--	journey	) Results Report
17:21:53,06/23/2019
Diameter: 49.9	mm	Height: 99.7	mm
Vertical force transducer (Test piece vertical force)
Control mode: force/confining pressure	Waveform: Slope
KN/s	Force the finish: 11.680	KN	Confining pressure rate :0.500	MPa/s	End point of confining pressure :5.9730	MPa
Time (ms)	Vertical force (KN)	Vertical deformation (mm)	Confining pressure (MPa)				stress	axial strain
0	0	0	0				0	0
200	0	-0.0016	0				0	-0.0160481
400	0	-0.0014	0				0	-0.0140421
600	0.4	-0.00114	0.002				0.204536	-0.0114343
801	0.74	-0.00086	0.006				0.378391	-0.00862588
1003	0.5	-0.00087	0.009				0.25567	-0.00872618
1204	0.7	-0.00084	0.016				0.357937	-0.00842528
1404	1	0.00045	0.026				0.511339	0.00451354
1604	1.08	0.00152	0.043				0.552246	0.0152457
1804	1.3	0.00365	0.062				0.664741	0.0366098
2005	1.46	0.00849	0.094				0.746555	0.0851555
2206	1.7	0.01431	0.131				0.869277	0.143531
2406	1.9	0.01964	0.184				0.971544	0.196991
2606	2.04	0.02379	0.28				1.04313	0.238616
2806	2.22	0.02842	0.384				1.13517	0.285055
3007	2.5	0.03323	0.482				1.27835	0.3333
3208	2.84	0.03851	0.559				1.4522	0.386259
3408	3.12	0.04491	0.634				1.59538	0.450451
3608	3.46	0.05199	0.73				1.76923	0.521464
3808	3.58	0.05605	0.912				1.83059	0.562187
4009	3.78	0.05928	1.299				1.93286	0.594584
4211	3.94	0.06242	1.759				2.01468	0.626078
4412	4.04	0.06489	1.909				2.06581	0.650853
4612	4.24	0.06732	2.22				2.16808	0.675226
4812	4.38	0.06987	2.41				2.23967	0.700802
5012	4.56	0.0726	2.465				2.33171	0.728185
5213	4.8	0.07612	2.558				2.45443	0.76349
5414	5.08	0.07962	2.662				2.5976	0.798596
5614	5.38	0.08322	2.763				2.751	0.834704
5814	5.48	0.08668	2.863				2.80214	0.869408
6014	5.76	0.09008	2.965				2.94531	0.903511
6215	5.96	0.09341	3.065				3.04758	0.936911
6416	6.24	0.09572	3.165				3.19076	0.96008
6616	6.3	0.0978	3.267				3.22144	0.980943
6816	6.48	0.09953	3.363				3.31348	0.998295
7016	6.58	0.1014	3.462				3.36461	1.01705
7217	6.76	0.10333	3.561				3.45665	1.03641
7419	6.92	0.10528	3.668				3.53847	1.05597
7620	7.22	0.10797	3.762				3.69187	1.08295
7820	7.58	0.11095	3.865				3.87595	1.11284
8020	7.74	0.11369	3.965				3.95776	1.14032
8220	8	0.1163	4.064				4.09071	1.1665
8421	8.22	0.11882	4.167				4.20321	1.19178
8622	8.4	0.12046	4.267				4.29525	1.20822
8822	8.52	0.12182	4.365				4.35661	1.22187
9022	8.64	0.12308	4.467				4.41797	1.2345
9222	8.84	0.12421	4.566				4.52024	1.24584
9423	8.94	0.12547	4.666				4.57137	1.25848
9624	9.04	0.12654	4.767				4.62251	1.26921
9824	9.44	0.129	4.866				4.82704	1.29388
10024	9.64	0.13153	4.969				4.92931	1.31926
10224	9.98	0.13411	5.069				5.10316	1.34514
10425	10.22	0.13652	5.169				5.22589	1.36931
10627	10.4	0.13896	5.27				5.31793	1.39378
10828	10.52	0.14012	5.37				5.37929	1.40542
11028	10.56	0.1408	5.47				5.39974	1.41224
11228	10.72	0.14175	5.57				5.48156	1.42177
11428	10.96	0.14366	5.671				5.60428	1.44092
11629	11.24	0.14597	5.771				5.74745	1.46409
11830	11.44	0.1482	5.871				5.84972	1.48646
12030	11.68	0.15041	5.973				5.97244	1.50863
12192	12.02	0.15219	6.012				6.1463	1.52648
12225	11.96	0.15231	6.01				6.11562	1.52768
12426	11.66	0.15282	5.986				5.96221	1.5328
12626	12.06	0.15298	5.99				6.16675	1.5344
12826	12.2	0.15463	5.987				6.23834	1.55095
13026	12.38	0.15597	5.989				6.33038	1.56439
13228	12.24	0.15672	5.987				6.25879	1.57192
13429	12.28	0.1573	5.985				6.27924	1.57773
13630	12.44	0.15825	5.986				6.36106	1.58726
13830	12.66	0.15907	5.986				6.47355	1.59549
14030	12.76	0.16003	5.984				6.52469	1.60512
14230	12.84	0.16111	5.984				6.56559	1.61595
14431	12.94	0.16307	5.987				6.61673	1.63561
14632	12.64	0.16358	5.986				6.46333	1.64072
14832	12.88	0.16389	5.987				6.58605	1.64383
15032	13.06	0.16513	5.987				6.67809	1.65627
15232	13.2	0.16638	5.986				6.74968	1.66881
15433	13.3	0.16755	5.989				6.80081	1.68054
15634	13.36	0.16842	5.989				6.83149	1.68927
15834	13.42	0.1694	5.988				6.86217	1.6991
16034	13.56	0.17035	5.989				6.93376	1.70863
16234	13.68	0.17111	5.987				6.99512	1.71625
16436	13.8	0.17217	5.987				7.05648	1.72688
16637	13.8	0.17307	5.987				7.05648	1.73591
16838	13.96	0.17381	5.986				7.13829	1.74333
17038	14.2	0.17483	5.988				7.26102	1.75356
17238	14.16	0.17594	5.991				7.24056	1.76469
17438	14.34	0.17688	5.988				7.3326	1.77412
17639	14.42	0.17785	5.985				7.37351	1.78385
17840	14.5	0.17883	5.985				7.41442	1.79368
18040	14.58	0.1799	5.988				7.45532	1.80441
18240	14.68	0.18086	5.982				7.50646	1.81404
18440	14.82	0.18181	5.985				7.57805	1.82357
18641	14.94	0.18277	5.986				7.63941	1.8332
18842	15.04	0.18374	5.986				7.69054	1.84293
19042	15.2	0.18468	5.986				7.77235	1.85236
19242	15.22	0.18567	5.987				7.78258	1.86229
19442	15.44	0.1865	5.988				7.89508	1.87061
19644	15.52	0.18737	5.989				7.93598	1.87934
19844	15.56	0.18835	5.985				7.95644	1.88917
20044	15.78	0.18928	5.99				8.06893	1.8985
20244	15.78	0.19018	5.985				8.06893	1.90752
20444	15.92	0.19113	5.984				8.14052	1.91705
20644	16	0.1922	5.987				8.18143	1.92778
20844	16.06	0.19318	5.985				8.21211	1.93761
21044	16.36	0.19407	5.985				8.36551	1.94654
21244	16.5	0.19493	5.986				8.4371	1.95517
21444	16.52	0.19602	5.985				8.44732	1.9661
21644	16.64	0.19708	5.985				8.50868	1.97673
21844	16.92	0.19788	5.986				8.65186	1.98475
22044	16.98	0.19886	5.988				8.68254	1.99458
22244	17.08	0.19982	5.983				8.73367	2.00421
22444	17.26	0.20076	5.985				8.82571	2.01364
22644	17.4	0.20161	5.987				8.8973	2.02217
22844	17.54	0.20266	5.988				8.96889	2.0327
23044	17.64	0.20363	5.987				9.02002	2.04243
23244	17.76	0.20458	5.987				9.08138	2.05196
23444	17.94	0.20562	5.987				9.17342	2.06239
23644	17.96	0.20651	5.985				9.18365	2.07131
23844	18.22	0.20742	5.987				9.3166	2.08044
24044	18.3	0.2084	5.985				9.35751	2.09027
24244	18.44	0.20935	5.985				9.42909	2.0998
24444	18.5	0.21023	5.987				9.45977	2.10863
24644	18.6	0.21109	5.985				9.51091	2.11725
24844	18.72	0.21205	5.987				9.57227	2.12688
25044	18.86	0.213	5.985				9.64386	2.13641
25244	19.06	0.21393	5.985				9.74612	2.14574
25444	19.16	0.21489	5.985				9.79726	2.15537
25644	19.3	0.21585	5.982				9.86885	2.16499
25844	19.42	0.2168	5.988				9.93021	2.17452
26044	19.6	0.21774	5.987				10.0222	2.18395
26244	19.82	0.21866	5.985				10.1347	2.19318
26444	19.94	0.21962	5.985				10.1961	2.20281
26644	20.1	0.22057	5.987				10.2779	2.21234
26844	20.1	0.22157	5.986				10.2779	2.22237
27044	20.32	0.22269	5.986				10.3904	2.2336
27244	20.52	0.22352	5.987				10.4927	2.24193
27444	20.62	0.22448	5.985				10.5438	2.25155
27644	20.82	0.22541	5.984				10.6461	2.26088
27844	20.76	0.22643	5.987				10.6154	2.27111
28044	21	0.22725	5.988				10.7381	2.27934
28244	21.18	0.22819	5.986				10.8302	2.28877
28444	21.22	0.22917	5.987				10.8506	2.2986
28644	21.4	0.23001	5.986				10.9427	2.30702
28844	21.58	0.23095	5.985				11.0347	2.31645
29044	21.68	0.23191	5.986				11.0858	2.32608
29244	21.86	0.23295	5.985				11.1779	2.33651
29444	21.98	0.23401	5.989				11.2392	2.34714
29644	22.16	0.23474	5.985				11.3313	2.35446
29844	22.3	0.2357	5.988				11.4029	2.36409
30044	22.48	0.23673	5.987				11.4949	2.37442
30244	22.58	0.2377	5.986				11.546	2.38415
30444	22.76	0.23873	5.991				11.6381	2.39448
30644	22.8	0.23962	5.983				11.6585	2.40341
30844	22.94	0.24067	5.99				11.7301	2.41394
31044	23.12	0.24151	5.984				11.8222	2.42237
31244	23.26	0.24236	5.987				11.8937	2.43089
31444	23.5	0.24338	5.984				12.0165	2.44112
31644	23.7	0.24421	5.99				12.1187	2.44945
31844	23.76	0.24518	5.983				12.1494	2.45918
32044	23.9	0.24624	5.986				12.221	2.46981
32244	24.1	0.24727	5.986				12.3233	2.48014
32444	24.22	0.24802	5.986				12.3846	2.48766
32644	24.46	0.24914	5.987				12.5074	2.4989
32844	24.48	0.25013	5.988				12.5176	2.50883
33044	24.64	0.25108	5.985				12.5994	2.51836
33244	24.86	0.2521	5.987				12.7119	2.52859
33444	25.04	0.25304	5.985				12.8039	2.53801
33644	25.04	0.25394	5.987				12.8039	2.54704
33844	25.2	0.25488	5.985				12.8857	2.55647
34044	25.38	0.25582	5.983				12.9778	2.5659
34244	25.54	0.25686	5.986				13.0596	2.57633
34444	25.66	0.25772	5.99				13.121	2.58495
34644	25.8	0.25847	5.987				13.1925	2.59248
34844	25.96	0.25951	5.985				13.2744	2.60291
35044	26.14	0.26045	5.986				13.3664	2.61234
35244	26.2	0.26143	5.987				13.3971	2.62217
35444	26.38	0.26227	5.989				13.4891	2.63059
35644	26.54	0.26331	5.987				13.5709	2.64102
35844	26.68	0.26426	5.986				13.6425	2.65055
36044	26.82	0.26511	5.99				13.7141	2.65908
36244	27.02	0.26624	5.987				13.8164	2.67041
36444	27.18	0.26739	5.987				13.8982	2.68195
36644	27.44	0.2683	5.988				14.0311	2.69107
36844	27.54	0.26926	5.987				14.0823	2.7007
37044	27.66	0.27022	5.985				14.1436	2.71033
37244	27.84	0.27126	5.989				14.2357	2.72076
37444	28.06	0.27208	5.988				14.3482	2.72899
37644	28.18	0.27304	5.985				14.4095	2.73862
37844	28.3	0.2739	5.986				14.4709	2.74724
38044	28.54	0.27481	5.987				14.5936	2.75637
38244	28.64	0.27568	5.987				14.6448	2.7651
38444	28.8	0.27662	5.989				14.7266	2.77452
38644	28.98	0.27766	5.985				14.8186	2.78495
38844	29.12	0.27851	5.987				14.8902	2.79348
39044	29.24	0.27947	5.985				14.9516	2.80311
39244	29.42	0.2804	5.987				15.0436	2.81244
39444	29.6	0.28144	5.981				15.1356	2.82287
39644	29.76	0.28248	5.99				15.2175	2.8333
39844	29.96	0.28341	5.984				15.3197	2.84263
40044	30.12	0.28426	5.986				15.4015	2.85115
40244	30.22	0.28522	5.984				15.4527	2.86078
40444	30.36	0.28617	5.986				15.5243	2.87031
40644	30.52	0.28722	5.988				15.6061	2.88084
40844	30.68	0.28806	5.985				15.6879	2.88927
41044	30.82	0.28901	5.988				15.7595	2.8988
41244	31.08	0.28982	5.988				15.8924	2.90692
41444	31.12	0.29081	5.986				15.9129	2.91685
41644	31.28	0.29185	5.988				15.9947	2.92728
41844	31.48	0.29278	5.983				16.097	2.93661
42044	31.72	0.2937	5.985				16.2197	2.94584
42244	31.76	0.29448	5.985				16.2401	2.95366
42444	31.94	0.29542	5.987				16.3322	2.96309
42644	32.12	0.29636	5.989				16.4242	2.97252
42844	32.22	0.29732	5.987				16.4753	2.98215
43044	32.46	0.29824	5.984				16.5981	2.99137
43244	32.6	0.29919	5.986				16.6697	3.0009
43444	32.8	0.30012	5.987				16.7719	3.01023
43644	32.96	0.30096	5.988				16.8537	3.01866
43844	33.04	0.30194	5.985				16.8946	3.02849
44044	33.16	0.30299	5.983				16.956	3.03902
44244	33.34	0.30393	5.988				17.048	3.04845
44444	33.54	0.30496	5.985				17.1503	3.05878
44644	33.68	0.30621	5.985				17.2219	3.07131
44844	34.04	0.30729	5.989				17.406	3.08215
45044	34.1	0.30827	5.987				17.4367	3.09198
45244	34.3	0.3092	5.988				17.5389	3.1013
45444	34.36	0.31007	5.988				17.5696	3.11003
45644	34.58	0.3109	5.986				17.6821	3.11836
45844	34.8	0.31162	5.984				17.7946	3.12558
46044	34.98	0.31256	5.988				17.8866	3.13501
46244	35	0.31345	5.988				17.8969	3.14393
46444	35.26	0.31426	5.989				18.0298	3.15206
46644	35.28	0.31525	5.989				18.04	3.16199
46844	35.5	0.31608	5.988				18.1525	3.17031
47044	35.72	0.3172	5.987				18.265	3.18154
47244	35.9	0.31804	5.985				18.3571	3.18997
47444	36.06	0.31908	5.987				18.4389	3.2004
47644	36.16	0.32004	5.985				18.49	3.21003
47844	36.26	0.32091	5.987				18.5412	3.21876
48044	36.38	0.32167	5.985				18.6025	3.22638
48244	36.64	0.32278	5.988				18.7355	3.23751
48444	36.8	0.32372	5.989				18.8173	3.24694
48644	37	0.32455	5.986				18.9195	3.25527
48844	37.16	0.32559	5.986				19.0014	3.2657
49044	37.28	0.32655	5.988				19.0627	3.27533
49244	37.48	0.32728	5.987				19.165	3.28265
49444	37.66	0.32822	5.986				19.257	3.29208
49644	37.72	0.3292	5.993				19.2877	3.30191
49844	37.94	0.33012	5.987				19.4002	3.31113
50044	38.18	0.33104	5.984				19.5229	3.32036
50244	38.24	0.33202	5.987				19.5536	3.33019
50444	38.46	0.33314	5.988				19.6661	3.34142
50644	38.76	0.33423	5.989				19.8195	3.35236
50844	38.92	0.33518	5.985				19.9013	3.36189
51044	39.02	0.33624	5.987				19.9525	3.37252
51244	39.26	0.33706	5.99				20.0752	3.38074
51444	39.4	0.33811	5.985				20.1468	3.39127
51644	39.66	0.33892	5.989				20.2797	3.3994
51844	39.78	0.33988	5.989				20.3411	3.40903
52044	39.8	0.34077	5.989				20.3513	3.41795
52244	40.14	0.34165	5.987				20.5252	3.42678
52444	40.24	0.34252	5.988				20.5763	3.43551
52644	40.36	0.34347	5.988				20.6376	3.44504
52844	40.42	0.34445	5.986				20.6683	3.45486
53044	40.56	0.3453	5.985				20.7399	3.46339
53244	40.72	0.34635	5.987				20.8217	3.47392
53444	41.06	0.34713	5.987				20.9956	3.48175
53644	41.14	0.3482	5.987				21.0365	3.49248
53844	41.32	0.34914	5.99				21.1285	3.50191
54044	41.42	0.3502	5.987				21.1797	3.51254
54244	41.66	0.35112	5.991				21.3024	3.52177
54444	41.78	0.35188	5.988				21.3637	3.52939
54644	41.94	0.35282	5.987				21.4456	3.53882
54844	42.06	0.35378	5.986				21.5069	3.54845
55044	42.32	0.35459	5.99				21.6399	3.55657
55244	42.38	0.35557	5.987				21.6706	3.5664
55444	42.62	0.35638	5.987				21.7933	3.57452
55644	42.76	0.35733	5.99				21.8649	3.58405
55844	43.06	0.35843	5.984				22.0183	3.59509
56044	43.34	0.35963	5.989				22.1614	3.60712
56244	43.54	0.36066	5.987				22.2637	3.61745
56444	43.72	0.3618	5.99				22.3557	3.62889
56644	43.88	0.36274	5.99				22.4376	3.63831
56844	44.12	0.36366	5.986				22.5603	3.64754
57044	44.16	0.36444	5.987				22.5807	3.65537
57244	44.34	0.36538	5.987				22.6728	3.66479
57444	44.42	0.36625	5.986				22.7137	3.67352
57644	44.62	0.36718	5.988				22.816	3.68285
57844	44.86	0.368	5.989				22.9387	3.69107
58044	44.94	0.36887	5.986				22.9796	3.6998
58244	45.1	0.36992	5.988				23.0614	3.71033
58444	45.24	0.37077	5.988				23.133	3.71886
58644	45.44	0.3716	5.986				23.2353	3.72718
58844	45.62	0.37253	5.988				23.3273	3.73651
59044	45.66	0.37352	5.985				23.3477	3.74644
59244	45.88	0.37434	5.989				23.4602	3.75466
59444	45.98	0.37541	5.983				23.5114	3.7654
59644	46.2	0.37633	5.989				23.6239	3.77462
59844	46.38	0.37727	5.985				23.7159	3.78405
60044	46.58	0.3782	5.986				23.8182	3.79338
60244	46.74	0.37914	5.988				23.9	3.80281
60444	46.94	0.38007	5.987				24.0023	3.81214
60644	47.12	0.38101	5.99				24.0943	3.82156
60844	47.22	0.38197	5.987				24.1454	3.83119
61044	47.38	0.38292	5.989				24.2272	3.84072
61244	47.56	0.38375	5.987				24.3193	3.84905
61444	47.6	0.38474	5.988				24.3397	3.85898
61644	47.86	0.38565	5.988				24.4727	3.8681
61844	48.02	0.38669	5.987				24.5545	3.87854
62044	48.22	0.38752	5.986				24.6568	3.88686
62244	48.36	0.38857	5.988				24.7284	3.89739
62444	48.52	0.38952	5.987				24.8102	3.90692
62644	48.7	0.39036	5.986				24.9022	3.91535
62844	48.82	0.39131	5.985				24.9636	3.92487
63044	49.06	0.39223	5.986				25.0863	3.9341
63244	49.3	0.39305	5.988				25.209	3.94233
63444	49.5	0.39428	5.987				25.3113	3.95466
63644	49.62	0.39533	5.985				25.3726	3.9652
63844	49.9	0.39644	5.984				25.5158	3.97633
64044	49.9	0.39754	5.989				25.5158	3.98736
64244	50.12	0.39836	5.986				25.6283	3.99559
64444	50.34	0.39948	5.987				25.7408	4.00682
64644	50.52	0.40022	5.984				25.8329	4.01424
64844	50.64	0.40108	5.985				25.8942	4.02287
65044	50.78	0.40193	5.987				25.9658	4.03139
65244	50.9	0.40289	5.988				26.0272	4.04102
65444	51.08	0.40372	5.985				26.1192	4.04935
65644	51.28	0.40455	5.986				26.2215	4.05767
65844	51.42	0.4055	5.983				26.2931	4.0672
66044	51.62	0.40633	5.986				26.3953	4.07553
66244	51.76	0.40738	5.986				26.4669	4.08606
66444	51.86	0.40835	5.985				26.518	4.09579
66644	52.1	0.40917	5.985				26.6408	4.10401
66844	52.28	0.4102	5.985				26.7328	4.11434
67044	52.42	0.41115	5.987				26.8044	4.12387
67244	52.58	0.412	5.987				26.8862	4.1324
67444	52.86	0.4128	5.985				27.0294	4.14042
67644	52.96	0.41376	5.985				27.0805	4.15005
67844	53.08	0.41472	5.983				27.1419	4.15968
68044	53.28	0.41575	5.987				27.2441	4.17001
68244	53.46	0.41659	5.985				27.3362	4.17844
68444	53.58	0.41745	5.988				27.3976	4.18706
68644	53.84	0.41836	5.984				27.5305	4.19619
68844	53.98	0.41931	5.987				27.6021	4.20572
69044	54.22	0.42042	5.985				27.7248	4.21685
69244	54.4	0.42136	5.986				27.8168	4.22628
69444	54.52	0.42232	5.988				27.8782	4.23591
69644	54.8	0.42332	5.985				28.0214	4.24594
69844	54.92	0.42428	5.985				28.0827	4.25557
70044	55.2	0.42518	5.987				28.2259	4.26459
70244	55.28	0.42605	5.985				28.2668	4.27332
70444	55.46	0.42699	5.987				28.3589	4.28275
70644	55.58	0.42795	5.983				28.4202	4.29238
70844	55.8	0.42867	5.988				28.5327	4.2996
71044	56.02	0.42969	5.989				28.6452	4.30983
71244	56.1	0.43057	5.986				28.6861	4.31866
71444	56.22	0.43152	5.984				28.7475	4.32818
71644	56.32	0.43249	5.988				28.7986	4.33791
71844	56.58	0.4335	5.987				28.9316	4.34804
72044	56.82	0.43461	5.989				29.0543	4.35918
72244	57	0.43545	5.987				29.1463	4.3676
72444	57.26	0.43646	5.987				29.2793	4.37773
72644	57.4	0.43731	5.987				29.3509	4.38626
72844	57.48	0.43828	5.987				29.3918	4.39599
73044	57.66	0.43922	5.987				29.4838	4.40542
73244	57.8	0.44017	5.983				29.5554	4.41494
73444	57.98	0.44111	5.986				29.6474	4.42437
73644	58.2	0.44203	5.988				29.7599	4.4336
73844	58.4	0.44296	5.988				29.8622	4.44293
74044	58.58	0.4439	5.987				29.9542	4.45236
74244	58.7	0.44466	5.987				30.0156	4.45998
74444	58.82	0.44581	5.987				30.077	4.47151
74644	59.1	0.44682	5.987				30.2201	4.48164
74844	59.24	0.44777	5.99				30.2917	4.49117
75044	59.44	0.4487	5.989				30.394	4.5005
75244	59.68	0.44951	5.987				30.5167	4.50863
75444	59.68	0.45061	5.985				30.5167	4.51966
75644	59.88	0.45154	5.987				30.619	4.52899
75844	60.06	0.45238	5.987				30.711	4.53741
76044	60.24	0.45332	5.989				30.8031	4.54684
76244	60.38	0.45407	5.989				30.8747	4.55436
76444	60.54	0.45501	5.987				30.9565	4.56379
76644	60.76	0.45603	5.988				31.069	4.57402
76844	60.92	0.45698	5.989				31.1508	4.58355
77044	61.14	0.4578	5.988				31.2633	4.59178
77244	61.24	0.45877	5.987				31.3144	4.6015
77444	61.52	0.45967	5.989				31.4576	4.61053
77644	61.56	0.46065	5.987				31.478	4.62036
77844	61.86	0.46175	5.991				31.6314	4.63139
78044	61.96	0.46261	5.988				31.6826	4.64002
78244	62.16	0.46354	5.99				31.7848	4.64935
78444	62.36	0.46457	5.987				31.8871	4.65968
78644	62.52	0.46542	5.988				31.9689	4.6682
78844	62.64	0.46628	5.989				32.0303	4.67683
79044	62.9	0.46719	5.989				32.1632	4.68596
79244	63.02	0.46814	5.987				32.2246	4.69549
79444	63.04	0.46914	5.987				32.2348	4.70552
79644	63.28	0.47005	5.989				32.3575	4.71464
79844	63.46	0.47099	5.986				32.4496	4.72407
80044	63.66	0.47202	5.986				32.5518	4.7344
80244	63.72	0.4731	5.986				32.5825	4.74524
80444	64	0.4741	5.986				32.7257	4.75527
80644	64.26	0.47501	5.987				32.8587	4.76439
80844	64.32	0.47589	5.987				32.8893	4.77322
81044	64.58	0.4768	5.989				33.0223	4.78235
81244	64.6	0.47779	5.987				33.0325	4.79228
81444	64.82	0.47871	5.989				33.145	4.8015
81644	65	0.47955	5.989				33.237	4.80993
81844	65.12	0.48051	5.986				33.2984	4.81956
82044	65.26	0.48136	5.986				33.37	4.82808
82244	65.54	0.48226	5.987				33.5132	4.83711
82444	65.6	0.48334	5.985				33.5438	4.84794
82644	65.88	0.48424	5.987				33.687	4.85697
82844	66	0.4852	5.987				33.7484	4.8666
83044	66.16	0.48634	5.989				33.8302	4.87803
83244	66.28	0.4875	5.986				33.8916	4.88967
83444	66.52	0.48832	5.988				34.0143	4.89789
83644	66.72	0.48915	5.987				34.1165	4.90622
83844	66.9	0.49009	5.986				34.2086	4.91565
84044	67.02	0.49104	5.987				34.2699	4.92518
84244	67.24	0.49187	5.986				34.3824	4.9335
84444	67.36	0.49272	5.987				34.4438	4.94203
84644	67.44	0.4937	5.988				34.4847	4.95186
84844	67.6	0.49454	5.987				34.5665	4.96028
85044	67.84	0.49546	5.987				34.6892	4.96951
85244	68.04	0.49639	5.989				34.7915	4.97884
85444	68.14	0.49745	5.987				34.8426	4.98947
85644	68.32	0.49829	5.986				34.9347	4.99789
85844	68.52	0.49932	5.986				35.037	5.00822
86044	68.64	0.50018	5.985				35.0983	5.01685
86244	68.82	0.50111	5.988				35.1904	5.02618
86444	69	0.50195	5.988				35.2824	5.0346
86644	69.24	0.50297	5.987				35.4051	5.04483
86844	69.48	0.50408	5.988				35.5278	5.05597
87044	69.64	0.50503	5.987				35.6097	5.0655
87244	69.76	0.50618	5.987				35.671	5.07703
87444	69.94	0.50712	5.987				35.7631	5.08646
87644	70.14	0.50805	5.986				35.8653	5.09579
87844	70.26	0.50881	5.987				35.9267	5.10341
88044	70.48	0.50983	5.985				36.0392	5.11364
88244	70.66	0.51067	5.988				36.1312	5.12207
88444	70.72	0.51165	5.988				36.1619	5.1319
88644	70.96	0.51266	5.987				36.2846	5.14203
88844	71.12	0.51351	5.988				36.3664	5.15055
89044	71.28	0.51435	5.989				36.4483	5.15898
89244	71.38	0.51532	5.99				36.4994	5.16871
89444	71.56	0.51635	5.987				36.5914	5.17904
89644	71.76	0.51718	5.987				36.6937	5.18736
89844	71.92	0.51813	5.987				36.7755	5.19689
90044	72.06	0.51908	5.987				36.8471	5.20642
90244	72.26	0.52001	5.987				36.9494	5.21575
90444	72.54	0.52091	5.989				37.0925	5.22477
90644	72.64	0.52178	5.991				37.1437	5.2335
90844	72.76	0.52263	5.989				37.205	5.24203
91044	73	0.52345	5.986				37.3278	5.25025
91244	73.18	0.52449	5.984				37.4198	5.26068
91444	73.34	0.52543	5.985				37.5016	5.27011
91644	73.54	0.52646	5.986				37.6039	5.28044
91844	73.74	0.52759	5.987				37.7061	5.29178
92044	73.96	0.52861	5.987				37.8186	5.30201
92244	74.1	0.52947	5.991				37.8902	5.31063
92444	74.26	0.53051	5.988				37.972	5.32106
92644	74.48	0.53133	5.987				38.0845	5.32929
92844	74.54	0.53231	5.992				38.1152	5.33912
93044	74.68	0.53316	5.989				38.1868	5.34764
93244	74.82	0.53411	5.985				38.2584	5.35717
93444	74.88	0.53519	5.989				38.2891	5.368
93644	75.16	0.53599	5.986				38.4322	5.37603
93844	75.32	0.53694	5.985				38.5141	5.38556
94044	75.48	0.53778	5.987				38.5959	5.39398
94244	75.76	0.53888	5.986				38.7391	5.40502
94444	75.9	0.53983	5.987				38.8106	5.41454
94644	76.08	0.54087	5.985				38.9027	5.42497
94844	76.18	0.54174	5.989				38.9538	5.4337
95044	76.28	0.5426	5.986				39.0049	5.44233
95244	76.44	0.54355	5.987				39.0868	5.45186
95444	76.66	0.54437	5.985				39.1993	5.46008
95644	76.88	0.54529	5.987				39.3118	5.46931
95844	77.02	0.54634	5.987				39.3833	5.47984
96044	77.16	0.54729	5.988				39.4549	5.48937
96244	77.34	0.54823	5.988				39.547	5.4988
96444	77.44	0.5491	5.986				39.5981	5.50752
96644	77.7	0.54991	5.986				39.7311	5.51565
96844	77.82	0.55086	5.989				39.7924	5.52518
97044	77.98	0.55191	5.985				39.8742	5.53571
97244	78.12	0.55286	5.987				39.9458	5.54524
97444	78.26	0.55371	5.987				40.0174	5.55376
97644	78.64	0.55498	5.986				40.2117	5.5665
97844	78.78	0.55623	5.987				40.2833	5.57904
98044	78.98	0.55726	5.984				40.3856	5.58937
98244	79.24	0.55817	5.985				40.5185	5.5985
98444	79.32	0.55904	5.986				40.5594	5.60722
98644	79.54	0.55996	5.987				40.6719	5.61645
98844	79.52	0.56087	5.985				40.6617	5.62558
99044	79.72	0.5616	5.986				40.764	5.6329
99244	79.74	0.56249	5.989				40.7742	5.64183
99444	79.92	0.56333	5.985				40.8662	5.65025
99644	80.06	0.56438	5.984				40.9378	5.66078
99844	80.18	0.56524	5.987				40.9992	5.66941
100044	80.34	0.56608	5.984				41.081	5.67783
100244	80.58	0.567	5.985				41.2037	5.68706
100444	80.72	0.56805	5.983				41.2753	5.69759
100644	80.96	0.56886	5.985				41.398	5.70572
100844	80.98	0.56996	5.985				41.4082	5.71675
101044	81.26	0.57076	5.985				41.5514	5.72477
101244	81.34	0.57173	5.984				41.5923	5.7345
101444	81.5	0.57278	5.987				41.6741	5.74504
101644	81.68	0.57351	5.986				41.7662	5.75236
101844	81.82	0.57446	5.987				41.8378	5.76189
102044	81.96	0.57541	5.986				41.9094	5.77141
102244	82.08	0.57637	5.987				41.9707	5.78104
102444	82.32	0.57739	5.987				42.0934	5.79127
102644	82.42	0.57835	5.985				42.1446	5.8009
102844	82.6	0.57929	5.988				42.2366	5.81033
103044	82.96	0.58026	5.987				42.4207	5.82006
103244	83.12	0.58131	5.985				42.5025	5.83059
103444	83.24	0.58227	5.987				42.5639	5.84022
103644	83.46	0.58329	5.989				42.6764	5.85045
103844	83.66	0.58422	5.987				42.7786	5.85978
104044	83.72	0.585	5.984				42.8093	5.8676
104244	83.94	0.58592	5.992				42.9218	5.87683
104444	84.06	0.58688	5.989				42.9832	5.88646
104644	84.3	0.5877	5.987				43.1059	5.89468
104844	84.26	0.58871	5.985				43.0854	5.90481
105044	84.54	0.58961	5.987				43.2286	5.91384
105244	84.6	0.59049	5.988				43.2593	5.92267
105444	84.7	0.59135	5.987				43.3104	5.93129
105644	84.94	0.59237	5.987				43.4331	5.94152
105844	85.22	0.59327	5.989				43.5763	5.95055
106044	85.24	0.59437	5.985				43.5865	5.96158
106244	85.52	0.59527	5.989				43.7297	5.97061
106444	85.54	0.59626	5.992				43.7399	5.98054
106644	85.76	0.59708	5.988				43.8524	5.98877
106844	85.92	0.59803	5.988				43.9343	5.99829
107044	86.02	0.59889	5.988				43.9854	6.00692
107244	86.28	0.5999	5.986				44.1183	6.01705
107444	86.3	0.6007	5.985				44.1286	6.02508
107644	86.52	0.60172	5.989				44.2411	6.03531
107844	86.68	0.60266	5.989				44.3229	6.04473
108044	87.02	0.60364	5.989				44.4967	6.05456
108244	87.12	0.60471	5.987				44.5479	6.0653
108444	87.1	0.60582	5.987				44.5376	6.07643
108644	87.34	0.60653	5.987				44.6604	6.08355
108844	87.46	0.60749	5.985				44.7217	6.09318
109044	87.58	0.60845	5.989				44.7831	6.10281
109244	87.78	0.60938	5.989				44.8853	6.11214
109444	87.92	0.61023	5.987				44.9569	6.12066
109644	87.96	0.61121	5.987				44.9774	6.13049
109844	88.14	0.61215	5.991				45.0694	6.13992
110044	88.36	0.61297	5.985				45.1819	6.14814
110244	88.52	0.61392	5.985				45.2637	6.15767
110444	88.74	0.61494	5.988				45.3762	6.1679
110644	89.06	0.61593	5.985				45.5399	6.17783
110844	89.12	0.61701	5.982				45.5705	6.18867
111044	89.2	0.61798	5.986				45.6115	6.1984
111244	89.38	0.61902	5.989				45.7035	6.20883
111444	89.4	0.61991	5.988				45.7137	6.21775
111644	89.62	0.62083	5.986				45.8262	6.22698
111844	89.74	0.62169	5.988				45.8876	6.23561
112044	89.98	0.62271	5.988				46.0103	6.24584
112244	90.06	0.62358	5.983				46.0512	6.25456
112444	90.3	0.6244	5.986				46.1739	6.26279
112644	90.4	0.62546	5.989				46.2251	6.27342
112844	90.64	0.62638	5.987				46.3478	6.28265
113044	90.68	0.62726	5.989				46.3682	6.29147
113244	90.88	0.62819	5.987				46.4705	6.3008
113444	91.06	0.62913	5.987				46.5625	6.31023
113644	91.22	0.63007	5.985				46.6444	6.31966
113844	91.4	0.63101	5.985				46.7364	6.32909
114044	91.4	0.63201	5.99				46.7364	6.33912
114244	91.58	0.63305	5.988				46.8284	6.34955
114444	91.9	0.63394	5.99				46.9921	6.35848
114644	91.92	0.63493	5.985				47.0023	6.36841
114844	92.12	0.63586	5.985				47.1046	6.37773
115044	92.36	0.63677	5.986				47.2273	6.38686
115244	92.48	0.63773	5.988				47.2886	6.39649
115444	92.72	0.63865	5.988				47.4114	6.40572
115644	92.88	0.63949	5.985				47.4932	6.41414
115844	92.94	0.64047	5.987				47.5239	6.42397
116044	93.12	0.64141	5.988				47.6159	6.4334
116244	93.16	0.64239	5.988				47.6364	6.44323
116444	93.36	0.64332	5.987				47.7386	6.45256
116644	93.48	0.64418	5.986				47.8	6.46118
116844	93.56	0.64525	5.985				47.8409	6.47192
117044	93.7	0.64621	5.986				47.9125	6.48154
117244	93.88	0.64704	5.987				48.0045	6.48987
117444	94.04	0.64799	5.989				48.0863	6.4994
117644	94.18	0.64894	5.984				48.1579	6.50893
117844	94.28	0.6499	5.986				48.2091	6.51856
118044	94.48	0.65083	5.986				48.3113	6.52788
118244	94.6	0.65199	5.986				48.3727	6.53952
118444	94.86	0.6531	5.987				48.5056	6.55065
118644	94.94	0.65397	5.987				48.5465	6.55938
118844	95.12	0.65501	5.987				48.6386	6.56981
119044	95.08	0.65602	5.985				48.6181	6.57994
119244	95.18	0.65699	5.989				48.6693	6.58967
119444	95.26	0.65786	5.99				48.7102	6.5984
119644	95.4	0.65861	5.99				48.7818	6.60592
119844	95.58	0.65965	5.991				48.8738	6.61635
120044	95.62	0.66063	5.986				48.8942	6.62618
120244	95.82	0.66146	5.984				48.9965	6.6345
120444	96.04	0.66239	5.987				49.109	6.64383
120644	96.2	0.66343	5.987				49.1908	6.65426
120844	96.26	0.66431	5.988				49.2215	6.66309
121044	96.36	0.66527	5.989				49.2726	6.67272
121244	96.46	0.66624	5.982				49.3238	6.68245
121444	96.7	0.66716	5.987				49.4465	6.69168
121644	96.7	0.66826	5.987				49.4465	6.70271
121844	96.78	0.66963	5.988				49.4874	6.71645
122044	96.74	0.67064	5.991				49.4669	6.72658
122244	96.72	0.67155	5.988				49.4567	6.73571
122444	96.78	0.67253	5.985				49.4874	6.74554
122644	96.8	0.67332	5.983				49.4976	6.75346
122844	97.02	0.67414	5.987				49.6101	6.76169
123044	97.1	0.67501	5.986				49.651	6.77041
123244	97.36	0.67582	5.984				49.784	6.77854
123444	97.4	0.67671	5.986				49.8044	6.78746
123644	97.58	0.67765	5.987				49.8965	6.79689
123844	97.64	0.67853	5.988				49.9272	6.80572
124044	97.78	0.67968	5.988				49.9987	6.81725
124244	97.84	0.68066	5.985				50.0294	6.82708
124444	97.98	0.68171	5.989				50.101	6.83761
124644	98.18	0.68254	5.988				50.2033	6.84594
124844	98.22	0.68362	5.989				50.2237	6.85677
125044	98.42	0.68455	5.988				50.326	6.8661
125244	98.48	0.68563	5.984				50.3567	6.87693
125444	98.62	0.68648	5.987				50.4283	6.88546
125644	98.64	0.68748	5.987				50.4385	6.89549
125844	98.88	0.68849	5.988				50.5612	6.90562
126044	98.96	0.68956	5.989				50.6021	6.91635
126244	99.08	0.69052	5.986				50.6635	6.92598
126444	99.08	0.69132	5.988				50.6635	6.934
126644	99.2	0.69228	5.986				50.7248	6.94363
126844	99.32	0.69324	5.984				50.7862	6.95326
127044	99.46	0.69419	5.988				50.8578	6.96279
127244	99.62	0.69503	5.986				50.9396	6.97121
127444	99.68	0.69601	5.986				50.9703	6.98104
127644	99.76	0.69698	5.985				51.0112	6.99077
127844	99.96	0.69791	5.987				51.1135	7.0001
128044	99.98	0.69891	5.986				51.1237	7.01013
128244	100.2	0.69993	5.986				51.2362	7.02036
128444	100.3	0.701	5.987				51.2873	7.03109
128644	100.5	0.70192	5.983				51.3896	7.04032
128844	100.74	0.70294	5.987				51.5123	7.05055
129044	100.8	0.70402	5.987				51.543	7.06138
129244	100.92	0.70488	5.989				51.6043	7.07001
129444	100.98	0.70586	5.987				51.635	7.07984
129644	101.08	0.70682	5.987				51.6862	7.08947
129844	101.16	0.70769	5.987				51.7271	7.09819
130044	101.34	0.70863	5.985				51.8191	7.10762
130244	101.4	0.70941	5.986				51.8498	7.11545
130444	101.54	0.71046	5.987				51.9214	7.12598
130644	101.44	0.7117	5.987				51.8702	7.13842
130844	100.62	0.71368	5.985				51.4509	7.15827
131044	100.4	0.71436	5.987				51.3384	7.1651
131244	100.38	0.71477	5.987				51.3282	7.16921
131444	100.5	0.71552	5.987				51.3896	7.17673
131644	100.7	0.71686	5.985				51.4919	7.19017
131844	100.86	0.718	5.987				51.5737	7.2016
132044	100.98	0.71906	5.988				51.635	7.21224
132244	101.16	0.72009	5.982				51.7271	7.22257
132444	101.22	0.72097	5.984				51.7577	7.23139
132644	101.32	0.72204	5.984				51.8089	7.24213
132844	101.36	0.72292	5.986				51.8293	7.25095
133044	101.56	0.72375	5.987				51.9316	7.25928
133244	101.48	0.72488	5.988				51.8907	7.27061
133444	101.48	0.72578	5.985				51.8907	7.27964
133644	101.56	0.72655	5.985				51.9316	7.28736
133844	101.66	0.72752	5.987				51.9827	7.29709
134044	101.82	0.72836	5.986				52.0646	7.30552
134244	101.86	0.72945	5.989				52.085	7.31645
134444	101.98	0.73031	5.984				52.1464	7.32508
134644	102.12	0.73126	5.99				52.218	7.3346
134844	102.22	0.73212	5.988				52.2691	7.34323
135044	102.3	0.7331	5.989				52.31	7.35306
135244	102.4	0.73416	5.985				52.3611	7.36369
135444	102.48	0.73513	5.987				52.402	7.37342
135644	102.6	0.73609	5.985				52.4634	7.38305
135844	102.8	0.73702	5.986				52.5657	7.39238
136044	102.78	0.73803	5.987				52.5554	7.40251
136244	102.94	0.73897	5.989				52.6372	7.41194
136444	102.94	0.73997	5.99				52.6372	7.42197
136644	102.82	0.74131	5.984				52.5759	7.43541
136844	102.82	0.74231	5.984				52.5759	7.44544
137044	102.9	0.74319	5.987				52.6168	7.45426
137244	103.06	0.74403	5.989				52.6986	7.46269
137444	103.16	0.74489	5.989				52.7497	7.47131
137644	103.32	0.74584	5.986				52.8316	7.48084
137844	103.4	0.74671	5.989				52.8725	7.48957
138044	103.44	0.7476	5.987				52.8929	7.4985
138244	103.48	0.74868	5.987				52.9134	7.50933
138444	103.7	0.74951	5.99				53.0259	7.51765
138644	103.8	0.75047	5.992				53.077	7.52728
138844	103.88	0.75144	5.987				53.1179	7.53701
139044	104.06	0.75248	5.985				53.2099	7.54744
139244	104.16	0.75334	5.989				53.2611	7.55607
139444	104.16	0.75454	5.989				53.2611	7.5681
139644	104.2	0.75563	5.988				53.2815	7.57904
139844	104.26	0.75661	5.987				53.3122	7.58887
140044	104.4	0.75756	5.986				53.3838	7.5984
140244	104.32	0.75849	5.987				53.3429	7.60772
140444	104.42	0.75945	5.985				53.394	7.61735
140644	104.52	0.76042	5.987				53.4452	7.62708
140844	104.64	0.76138	5.985				53.5065	7.63671
141044	104.58	0.7623	5.987				53.4758	7.64594
141244	104.78	0.76333	5.986				53.5781	7.65627
141444	104.9	0.76429	5.988				53.6395	7.6659
141644	105.04	0.76534	5.987				53.7111	7.67643
141844	105.2	0.76628	5.985				53.7929	7.68586
142044	105.12	0.76741	5.985				53.752	7.69719
142244	105.04	0.76864	5.988				53.7111	7.70953
142444	105	0.76965	5.988				53.6906	7.71966
142644	105.14	0.7705	5.987				53.7622	7.72818
142844	105.28	0.77145	5.987				53.8338	7.73771
143044	105.24	0.77227	5.985				53.8133	7.74594
143244	105.4	0.77321	5.987				53.8951	7.75537
143444	105.48	0.77398	5.989				53.9361	7.76309
143644	105.56	0.77515	5.987				53.977	7.77482
143844	105.78	0.77598	5.986				54.0895	7.78315
144044	105.88	0.77694	5.985				54.1406	7.79278
144244	106.04	0.77789	5.985				54.2224	7.80231
144444	106.04	0.77889	5.989				54.2224	7.81234
144644	106.02	0.77989	5.987				54.2122	7.82237
144844	106.08	0.78087	5.99				54.2429	7.8322
145044	106.12	0.78196	5.983				54.2633	7.84313
145244	105.94	0.78362	5.986				54.1713	7.85978
145444	105.78	0.78458	5.986				54.0895	7.86941
145644	105.88	0.78534	5.989				54.1406	7.87703
145844	105.84	0.78626	5.985				54.1201	7.88626
146044	105.96	0.78701	5.988				54.1815	7.89378
146244	106.1	0.78787	5.985				54.2531	7.90241
146444	106.2	0.78883	5.986				54.3042	7.91204
146644	106.22	0.78982	5.986				54.3144	7.92197
146844	106.34	0.79078	5.989				54.3758	7.93159
147044	106.46	0.79174	5.988				54.4372	7.94122
147244	106.48	0.79263	5.985				54.4474	7.95015
147444	106.56	0.7937	5.986				54.4883	7.96088
147644	106.08	0.79587	5.991				54.2429	7.98265
147844	106.08	0.79587	5.991				54.2429	7.98265
148044	104.28	0.798	5.985				53.3224	8.00401
148244	104.2	0.79893	5.987				53.2815	8.01334
148444	104.2	0.79943	5.988				53.2815	8.01836
148644	104.32	0.80029	5.984				53.3429	8.02698
148844	104.58	0.8013	5.987				53.4758	8.03711
149044	104.52	0.80242	5.987				53.4452	8.04835
149244	104.68	0.80346	5.985				53.527	8.05878
149444	104.76	0.80443	5.988				53.5679	8.06851
149644	104.82	0.80551	5.987				53.5986	8.07934
149844	104.9	0.80639	5.985				53.6395	8.08816
150044	105	0.80735	5.986				53.6906	8.09779
150244	105.08	0.80842	5.989				53.7315	8.10853
150444	105.1	0.80942	5.984				53.7417	8.11856
150644	105.02	0.81064	5.985				53.7008	8.13079
150844	105.02	0.81064	5.985				53.7008	8.13079
151044	103.6	0.81284	5.986				52.9747	8.15286
151244	103.78	0.81418	5.981				53.0668	8.1663
151444	103.72	0.8146	5.988				53.0361	8.17051
151644	103.92	0.81543	5.986				53.1384	8.17884
151844	104.2	0.81643	5.987				53.2815	8.18887
152044	104.34	0.81758	5.987				53.3531	8.2004
152244	104.42	0.81855	5.989				53.394	8.21013
152444	104.6	0.81959	5.988				53.4861	8.22056
152644	104.68	0.82056	5.985				53.527	8.23029
152844	104.72	0.82155	5.986				53.5474	8.24022
153044	104.88	0.82249	5.986				53.6292	8.24965
153244	104.84	0.82361	5.988				53.6088	8.26088
153444	104.76	0.82483	5.989				53.5679	8.27312
153644	104.64	0.82598	5.987				53.5065	8.28465
153844	104.36	0.82727	5.988				53.3634	8.29759
154044	104.02	0.82789	5.984				53.1895	8.30381
154244	103.9	0.82854	5.985				53.1281	8.31033
154444	104.06	0.82928	5.987				53.2099	8.31775
154644	104.2	0.83033	5.985				53.2815	8.32828
154844	104.3	0.8315	5.988				53.3327	8.34002
155044	104.44	0.83255	5.987				53.4043	8.35055
155244	104.62	0.83358	5.986				53.4963	8.36088
155444	104.76	0.83453	5.986				53.5679	8.37041
155644	104.78	0.83543	5.988				53.5781	8.37944
155844	104.9	0.83649	5.986				53.6395	8.39007
156044	104.96	0.83746	5.988				53.6702	8.3998
156244	105.1	0.83832	5.987				53.7417	8.40843
156444	105.1	0.83931	5.987				53.7417	8.41836
156644	105.14	0.8403	5.988				53.7622	8.42828
156844	105.26	0.84136	5.987				53.8236	8.43892
157044	105.42	0.8421	5.988				53.9054	8.44634
157244	105.38	0.84322	5.988				53.8849	8.45757
157444	105.44	0.8442	5.988				53.9156	8.4674
157644	105.54	0.84526	5.989				53.9667	8.47803
157844	105.48	0.84638	5.987				53.9361	8.48927
158044	105.54	0.84756	5.987				53.9667	8.5011
158244	105.42	0.8486	5.988				53.9054	8.51153
158444	105.26	0.84966	5.987				53.8236	8.52217
158644	105.18	0.85059	5.986				53.7826	8.53149
158844	105.12	0.85141	5.986				53.752	8.53972
159044	105.22	0.85227	5.989				53.8031	8.54835
159244	105.26	0.85306	5.987				53.8236	8.55627
159444	105.32	0.85394	5.985				53.8542	8.5651
159644	105.46	0.85489	5.986				53.9258	8.57462
159844	105.5	0.85588	5.987				53.9463	8.58455
160044	105.64	0.85693	5.985				54.0179	8.59509
160244	105.8	0.85787	5.985				54.0997	8.60451
160444	105.86	0.85885	5.986				54.1304	8.61434
160644	105.94	0.85982	5.987				54.1713	8.62407
160844	106.06	0.86088	5.989				54.2326	8.6347
161044	106.2	0.86183	5.985				54.3042	8.64423
161244	106.26	0.86281	5.982				54.3349	8.65406
161444	106.32	0.86389	5.988				54.3656	8.66489
161644	106.4	0.86496	5.985				54.4065	8.67563
161844	106.42	0.86595	5.983				54.4167	8.68556
162044	106.44	0.86695	5.987				54.4269	8.69559
162244	106.54	0.86811	5.985				54.4781	8.70722
162444	106.56	0.869	5.987				54.4883	8.71615
162644	106.48	0.87003	5.983				54.4474	8.72648
162844	106.42	0.87125	5.986				54.4167	8.73872
163044	106.26	0.87231	5.985				54.3349	8.74935
163244	106.24	0.87332	5.984				54.3247	8.75948
163444	106.14	0.87415	5.988				54.2735	8.7678
163644	106.06	0.87498	5.986				54.2326	8.77613
163844	106.14	0.87575	5.99				54.2735	8.78385
164044	106.02	0.87669	5.984				54.2122	8.79328
164244	106.08	0.87757	5.983				54.2429	8.80211
164444	106.32	0.87869	5.986				54.3656	8.81334
164644	106.52	0.87992	5.988				54.4678	8.82568
164844	106.54	0.88101	5.984				54.4781	8.83661
165044	106.62	0.88198	5.986				54.519	8.84634
165244	106.68	0.88296	5.988				54.5497	8.85617
165444	106.7	0.88386	5.988				54.5599	8.8652
165644	106.8	0.88482	5.988				54.611	8.87482
165844	106.88	0.88579	5.987				54.6519	8.88455
166044	106.84	0.88671	5.988				54.6315	8.89378
166244	106.9	0.88769	5.987				54.6622	8.90361
166444	107.02	0.88864	5.986				54.7235	8.91314
166644	107.04	0.88974	5.984				54.7337	8.92417
166844	107.06	0.89073	5.989				54.744	8.9341
167044	107.08	0.89172	5.987				54.7542	8.94403
167244	107.06	0.89273	5.99				54.744	8.95416
167444	106.8	0.89402	5.983				54.611	8.9671
167644	106.42	0.89525	5.987				54.4167	8.97944
167844	106.32	0.89629	5.986				54.3656	8.98987
168044	106.24	0.89702	5.987				54.3247	8.99719
168244	106.3	0.8979	5.987				54.3553	9.00602
168444	106.18	0.89874	5.987				54.294	9.01444
168644	106.34	0.89958	5.987				54.3758	9.02287
168844	106.5	0.90043	5.984				54.4576	9.03139
169044	106.52	0.90152	5.988				54.4678	9.04233
169244	106.7	0.90266	5.988				54.5599	9.05376
169444	106.88	0.90359	5.989				54.6519	9.06309
169644	107	0.90465	5.986				54.7133	9.07372
169844	107	0.90565	5.988				54.7133	9.08375
170044	107.16	0.90659	5.988				54.7951	9.09318
170244	107.2	0.90758	5.987				54.8156	9.10311
170444	107.34	0.90833	5.986				54.8871	9.11063
170644	107.36	0.90932	5.989				54.8974	9.12056
170844	107.36	0.91042	5.985				54.8974	9.13159
171044	107.42	0.9113	5.987				54.928	9.14042
171244	107.6	0.91224	5.989				55.0201	9.14985
171444	107.52	0.91327	5.988				54.9792	9.16018
171644	107.52	0.91427	5.988				54.9792	9.17021
171844	107.64	0.91523	5.988				55.0405	9.17984
172044	107.6	0.91624	5.986				55.0201	9.18997
172244	107.6	0.91724	5.985				55.0201	9.2
172444	107.66	0.91822	5.987				55.0508	9.20983
172644	107.74	0.91929	5.988				55.0917	9.22056
172844	107.62	0.92043	5.986				55.0303	9.232
173044	107.5	0.92158	5.986				54.969	9.24353
173244	107.4	0.92271	5.985				54.9178	9.25486
173444	107.52	0.92367	5.988				54.9792	9.26449
173644	107.48	0.92468	5.986				54.9587	9.27462
173844	107.42	0.9257	5.988				54.928	9.28485
174044	107.52	0.92657	5.985				54.9792	9.29358
174244	107.4	0.92761	5.989				54.9178	9.30401
174444	107.46	0.92859	5.989				54.9485	9.31384
174644	107.48	0.92948	5.985				54.9587	9.32277
174844	107.44	0.9305	5.988				54.9383	9.333
175044	107.52	0.93137	5.986				54.9792	9.34173
175244	107.48	0.93248	5.984				54.9587	9.35286
175444	107.5	0.93338	5.987				54.969	9.36189
175644	107.32	0.93434	5.987				54.8769	9.37151
175844	107.18	0.93549	5.988				54.8053	9.38305
176044	107.18	0.93649	5.986				54.8053	9.39308
176244	107.08	0.93752	5.984				54.7542	9.40341
176444	107.08	0.93852	5.988				54.7542	9.41344
176644	107.16	0.93939	5.987				54.7951	9.42217
176844	107.16	0.94049	5.988				54.7951	9.4332
177044	107.06	0.94163	5.986				54.744	9.44463
177244	107.2	0.94258	5.986				54.8156	9.45416
177444	107.26	0.94356	5.987				54.8462	9.46399
177644	107.16	0.94469	5.986				54.7951	9.47533
177844	107.12	0.94571	5.987				54.7746	9.48556
178044	107.1	0.94671	5.985				54.7644	9.49559
178244	107.14	0.9478	5.985				54.7849	9.50652
178444	107	0.94895	5.985				54.7133	9.51805
178644	107.04	0.94984	5.986				54.7337	9.52698
178844	107.1	0.95101	5.988				54.7644	9.53872
179044	107.12	0.95201	5.985				54.7746	9.54875
179244	107.12	0.95311	5.989				54.7746	9.55978
179444	107.06	0.95423	5.988				54.744	9.57101
179644	106.9	0.95538	5.987				54.6622	9.58255
179844	106.52	0.95692	5.987				54.4678	9.59799
180044	104.28	0.9588	5.987				53.3224	9.61685
180244	104.28	0.9588	5.987				53.3224	9.61685
180444	104.12	0.95966	5.986				53.2406	9.62548
180644	104.12	0.95966	5.986				53.2406	9.62548
180844	103.6	0.96264	5.987				52.9747	9.65537
181044	103.6	0.96264	5.987				52.9747	9.65537
181244	103.32	0.96364	5.987				52.8316	9.6654
181444	103.52	0.96487	5.985				52.9338	9.67773
181644	103.7	0.96591	5.991				53.0259	9.68816
181844	103.66	0.96702	5.987				53.0054	9.6993
182044	103.72	0.9679	5.984				53.0361	9.70812
182244	103.76	0.96888	5.984				53.0565	9.71795
182444	103.76	0.96988	5.985				53.0565	9.72798
182644	103.78	0.97088	5.988				53.0668	9.73801
182844	103.82	0.97176	5.989				53.0872	9.74684
183044	103.8	0.97287	5.988				53.077	9.75797
183244	103.74	0.97379	5.986				53.0463	9.7672
183444	103.7	0.97491	5.987				53.0259	9.77844
183644	103.64	0.97593	5.987				52.9952	9.78867
183844	103.48	0.97698	5.987				52.9134	9.7992
184044	103.24	0.97817	5.987				52.7907	9.81113
184244	103.14	0.9793	5.987				52.7395	9.82247
184444	102.96	0.98046	5.983				52.6475	9.8341
184644	102.9	0.98139	5.987				52.6168	9.84343
184844	102.8	0.98242	5.989				52.5657	9.85376
185044	102.74	0.98334	5.987				52.535	9.86299
185244	102.74	0.98434	5.989				52.535	9.87302
185444	102.8	0.98532	5.99				52.5657	9.88285
185644	102.74	0.98614	5.987				52.535	9.89107
185844	102.68	0.98716	5.988				52.5043	9.9013
186044	102.72	0.98815	5.987				52.5248	9.91123
186244	102.82	0.98911	5.988				52.5759	9.92086
186444	102.78	0.99003	5.988				52.5554	9.93009
186644	102.84	0.99101	5.986				52.5861	9.93992
186844	102.88	0.99189	5.988				52.6066	9.94875
187044	102.7	0.99316	5.989				52.5145	9.96148
187244	102.88	0.99399	5.987				52.6066	9.96981
187444	102.7	0.99516	5.986				52.5145	9.98154
187644	102.56	0.9963	5.989				52.4429	9.99298
187844	102.62	0.99738	5.987				52.4736	10.0038
188044	102.56	0.9985	5.99				52.4429	10.015
188244	102.42	0.99935	5.985				52.3714	10.0236
188444	102.2	1.00073	5.988				52.2589	10.0374
188644	101.72	1.0024	5.992				52.0134	10.0542
188844	94.78	1.00733	6.002				48.4647	10.1036
189044	89.86	1.00815	5.976				45.9489	10.1118
189244	90.02	1.00839	5.988				46.0307	10.1142
189444	90.38	1.00987	5.985				46.2148	10.1291
189644	90.18	1.01064	5.984				46.1126	10.1368
189844	90.24	1.01142	5.988				46.1432	10.1446
190044	90.36	1.01257	5.987				46.2046	10.1562
190244	90.38	1.01367	5.985				46.2148	10.1672
190444	90.44	1.01465	5.986				46.2455	10.177
190644	90.42	1.01565	5.983				46.2353	10.1871
190844	90.44	1.01635	5.985				46.2455	10.1941
191044	90.66	1.01727	5.986				46.358	10.2033
191244	90.78	1.01843	5.986				46.4194	10.2149
191444	90.94	1.01947	5.986				46.5012	10.2254
191644	91	1.02055	5.988				46.5319	10.2362
191844	91.02	1.02154	5.986				46.5421	10.2461
192044	91.08	1.02252	5.985				46.5728	10.256
192244	91.12	1.02321	5.985				46.5932	10.2629
192444	91.04	1.02434	5.987				46.5523	10.2742
192644	91.12	1.02551	5.985				46.5932	10.286
192844	91.24	1.02657	5.985				46.6546	10.2966
193044	91.32	1.02774	5.985				46.6955	10.3083
193244	91.1	1.02841	5.984				46.583	10.315
193444	91.16	1.02909	5.986				46.6137	10.3219
193644	91.12	1.03011	5.989				46.5932	10.3321
193844	91.24	1.03117	5.986				46.6546	10.3427
194044	91.26	1.03226	5.985				46.6648	10.3537
194244	91.26	1.03326	5.986				46.6648	10.3637
194444	91.28	1.03435	5.988				46.675	10.3746
194644	91.16	1.03539	5.985				46.6137	10.3851
194844	91.14	1.0364	5.986				46.6034	10.3952
195044	91.06	1.03733	5.985				46.5625	10.4045
195244	90.96	1.03836	5.987				46.5114	10.4148
195444	90.9	1.03948	5.989				46.4807	10.4261
195644	90.72	1.04045	5.984				46.3887	10.4358
195844	90.58	1.0416	5.981				46.3171	10.4473
196044	90.44	1.04265	5.987				46.2455	10.4579
196244	90.18	1.04364	5.987				46.1126	10.4678
196444	90.18	1.04464	5.984				46.1126	10.4778
196644	90.12	1.04576	5.985				46.0819	10.4891
196844	89.82	1.04696	5.99				45.9285	10.5011
197044	89.6	1.04804	5.99				45.816	10.5119
197244	89.34	1.04933	5.984				45.683	10.5249
197444	89.06	1.05033	5.987				45.5399	10.5349
197644	88.84	1.05121	5.986				45.4274	10.5437
197844	88.56	1.052	5.984				45.2842	10.5517
198044	88.38	1.05307	5.986				45.1922	10.5624
198244	88.28	1.0541	5.985				45.141	10.5727
198444	88.22	1.05542	5.989				45.1103	10.586
198644	88.2	1.05643	5.985				45.1001	10.5961
198844	88.1	1.05756	5.987				45.049	10.6074
199044	88	1.0585	5.99				44.9978	10.6169
199244	87.92	1.05943	5.989				44.9569	10.6262
199444	87.88	1.06054	5.986				44.9365	10.6373
199644	87.9	1.06143	5.987				44.9467	10.6462
199844	87.94	1.06232	5.987				44.9672	10.6552
200044	87.88	1.06334	5.984				44.9365	10.6654
200244	87.88	1.06444	5.985				44.9365	10.6764
200444	87.98	1.06531	5.988				44.9876	10.6852
200644	87.84	1.06646	5.989				44.916	10.6967
200844	87.96	1.06741	5.988				44.9774	10.7062
201044	87.86	1.06855	5.988				44.9263	10.7177
201244	87.86	1.06955	5.986				44.9263	10.7277
201444	87.76	1.07058	5.989				44.8751	10.738
201644	87.74	1.07149	5.985				44.8649	10.7471
201844	87.72	1.0724	5.986				44.8547	10.7563
202044	87.58	1.07325	5.988				44.7831	10.7648
202244	87.36	1.07452	5.986				44.6706	10.7775
202444	87.28	1.07575	5.989				44.6297	10.7899
202644	87.06	1.07693	5.987				44.5172	10.8017
202844	86.84	1.07811	5.986				44.4047	10.8135
203044	86.6	1.07909	5.984				44.282	10.8234
203244	86.42	1.07995	5.988				44.1899	10.832
203444	86.22	1.08072	5.988				44.0877	10.8397
203644	86.02	1.08199	5.988				43.9854	10.8525
203844	85.82	1.08336	5.986				43.8831	10.8662
204044	85.66	1.08452	5.988				43.8013	10.8778
204244	85.6	1.08554	5.988				43.7706	10.8881
204444	85.5	1.08658	5.985				43.7195	10.8985
204644	85.34	1.08753	5.988				43.6377	10.908
204844	85.32	1.08834	5.983				43.6275	10.9161
205044	85.38	1.08932	5.987				43.6581	10.926
205244	85.32	1.09024	5.986				43.6275	10.9352
205444	85.44	1.0912	5.987				43.6888	10.9448
205644	85.42	1.0923	5.985				43.6786	10.9559
205844	85.36	1.09332	5.987				43.6479	10.9661
206044	85.46	1.09429	5.985				43.699	10.9758
206244	85.38	1.09532	5.986				43.6581	10.9862
206444	85.44	1.0963	5.986				43.6888	10.996
206644	85.48	1.09728	5.986				43.7093	11.0058
206844	85.42	1.0983	5.985				43.6786	11.016
207044	85.46	1.09939	5.987				43.699	11.027
207244	85.42	1.1004	5.987				43.6786	11.0371
207444	85.38	1.10132	5.987				43.6581	11.0463
207644	85.32	1.10244	5.989				43.6275	11.0576
207844	85.44	1.1035	5.988				43.6888	11.0682
208044	85.36	1.10442	5.988				43.6479	11.0774
208244	85.32	1.10554	5.984				43.6275	11.0887
208444	85.34	1.10653	5.984				43.6377	11.0986
208644	85.22	1.10757	5.986				43.5763	11.109
208844	85.16	1.10859	5.984				43.5456	11.1193
209044	85.2	1.10948	5.984				43.5661	11.1282
209244	85.12	1.11051	5.986				43.5252	11.1385
209444	85.12	1.11141	5.987				43.5252	11.1475
209644	85.1	1.11251	5.988				43.515	11.1586
209844	85.18	1.11349	5.988				43.5559	11.1684
210044	85.14	1.1145	5.987				43.5354	11.1785
210244	85.1	1.11551	5.99				43.515	11.1887
210444	85.1	1.11652	5.983				43.515	11.1988
210644	84.94	1.11767	5.985				43.4331	11.2103
210844	84.98	1.11856	5.987				43.4536	11.2193
211044	84.96	1.11956	5.987				43.4434	11.2293
211244	84.88	1.12059	5.99				43.4025	11.2396
211444	84.82	1.12151	5.984				43.3718	11.2488
211644	84.76	1.12263	5.986				43.3411	11.2601
211844	84.76	1.12353	5.985				43.3411	11.2691
212044	84.7	1.12456	5.988				43.3104	11.2794
212244	84.58	1.1257	5.988				43.2491	11.2909
212444	84.46	1.12674	5.988				43.1877	11.3013
212644	84.5	1.12773	5.984				43.2082	11.3112
212844	84.5	1.12873	5.985				43.2082	11.3213
213044	84.46	1.12974	5.987				43.1877	11.3314
213244	84.36	1.13067	5.988				43.1366	11.3407
213444	84.4	1.13176	5.985				43.157	11.3517
213644	84.5	1.13273	5.985				43.2082	11.3614
213844	84.42	1.13385	5.988				43.1672	11.3726
214044	84.34	1.13478	5.987				43.1263	11.3819
214244	84.42	1.13575	5.987				43.1672	11.3917
214444	84.22	1.13682	5.987				43.065	11.4024
214644	84.22	1.13772	5.985				43.065	11.4114
214844	84.2	1.13863	5.987				43.0548	11.4206
215044	84.12	1.13956	5.987				43.0138	11.4299
215244	84.14	1.14065	5.987				43.0241	11.4408
215444	84.22	1.14182	5.989				43.065	11.4526
215644	84.18	1.14264	5.989				43.0445	11.4608
215844	84.06	1.14378	5.988				42.9832	11.4722
216044	84.04	1.14499	5.985				42.9729	11.4844
216244	84.06	1.14608	5.987				42.9832	11.4953
216444	84	1.1471	5.987				42.9525	11.5055
216644	83.92	1.14813	5.987				42.9116	11.5158
216844	83.86	1.14905	5.987				42.8809	11.5251
217044	83.94	1.15012	5.987				42.9218	11.5358
217244	83.8	1.15107	5.988				42.8502	11.5453
217444	83.86	1.15215	5.984				42.8809	11.5562
217644	83.76	1.15318	5.987				42.8298	11.5665
217844	83.74	1.15419	5.984				42.8195	11.5766
218044	83.62	1.15513	5.986				42.7582	11.5861
218244	83.56	1.15625	5.988				42.7275	11.5973
218444	83.6	1.15714	5.985				42.748	11.6062
218644	83.54	1.15826	5.988				42.7173	11.6175
218844	83.54	1.15916	5.986				42.7173	11.6265
219044	83.38	1.16032	5.985				42.6355	11.6381
219244	83.34	1.16113	5.987				42.615	11.6462
219444	83.28	1.16225	5.985				42.5843	11.6575
219644	83.18	1.16319	5.985				42.5332	11.6669
219844	83.18	1.16419	5.987				42.5332	11.6769
220044	83.14	1.1651	5.985				42.5127	11.6861
220244	83.1	1.16621	5.985				42.4923	11.6972
220444	83.1	1.16721	5.99				42.4923	11.7072
220644	83.1	1.16822	5.987				42.4923	11.7174
220844	82.94	1.16927	5.983				42.4105	11.7279
221044	82.86	1.1703	5.984				42.3696	11.7382
221244	82.8	1.17142	5.985				42.3389	11.7494
221444	82.72	1.17235	5.987				42.298	11.7588
221644	82.62	1.17338	5.985				42.2468	11.7691
221844	82.62	1.17448	5.986				42.2468	11.7801
222044	82.48	1.17553	5.985				42.1753	11.7907
222244	82.46	1.17654	5.987				42.165	11.8008
222444	82.42	1.17765	5.985				42.1446	11.8119
222644	82.32	1.17849	5.987				42.0934	11.8204
222844	82.26	1.17941	5.986				42.0628	11.8296
223044	82.34	1.18028	5.984				42.1037	11.8383
223244	82.3	1.1814	5.986				42.0832	11.8495
223444	82.22	1.18232	5.987				42.0423	11.8588
223644	82.16	1.18334	5.988				42.0116	11.869
223844	82.14	1.18435	5.987				42.0014	11.8791
224044	82.22	1.18542	5.987				42.0423	11.8899
224244	82.26	1.18641	5.989				42.0628	11.8998
224444	82.18	1.18744	5.985				42.0218	11.9101
224644	82.06	1.18858	5.986				41.9605	11.9216
224844	82.02	1.18939	5.99				41.94	11.9297
225044	81.96	1.19041	5.986				41.9094	11.9399
225244	81.92	1.19153	5.988				41.8889	11.9512
225444	82	1.1924	5.985				41.9298	11.9599
225644	82	1.1935	5.985				41.9298	11.9709
225844	81.96	1.19451	5.986				41.9094	11.981
226044	81.98	1.19561	5.988				41.9196	11.9921
226244	81.84	1.19666	5.985				41.848	12.0026
226444	81.76	1.19758	5.989				41.8071	12.0118
226644	81.76	1.19868	5.987				41.8071	12.0229
226844	81.84	1.19956	5.984				41.848	12.0317
227044	81.76	1.20048	5.986				41.8071	12.0409
227244	81.72	1.2016	5.987				41.7866	12.0522
227444	81.74	1.20259	5.989				41.7969	12.0621
227644	81.58	1.20375	5.983				41.715	12.0737
227844	81.64	1.20473	5.987				41.7457	12.0836
228044	81.56	1.20575	5.988				41.7048	12.0938
228244	81.6	1.20664	5.987				41.7253	12.1027
228444	81.6	1.20764	5.987				41.7253	12.1127
228644	81.44	1.2087	5.984				41.6435	12.1234
228844	81.58	1.20965	5.987				41.715	12.1329
229044	81.48	1.21078	5.987				41.6639	12.1442
229244	81.52	1.21187	5.987				41.6844	12.1552

## Sheet: F-5
Force (large)	--	journey	) Results Report
17:21:53,06/23/2019
Diameter: 50.1	mm	Height: 99.8	mm
Vertical force transducer (Test piece vertical force)
Control mode: force/confining pressure	Waveform: Slope
KN/s	Force the finish: 17.840	KN	Confining pressure rate :0.500	MPa/s	End point of confining pressure :9.0040	MPa
Time (ms)	Vertical force (KN)	Vertical deformation (mm)	Confining pressure (MPa)				stress	axial strain
0	0	0	0				0	0
200	0	-0.001	0				0	-0.01002
401	0	-0.0007	0				0	-0.00701403
601	0.34	-0.00072	0.004				0.17247	-0.00721443
801	0.5	-0.00078	0.011				0.253632	-0.00781563
1003	0.62	-0.00062	0.017				0.314504	-0.00621242
1204	0.7	-0.00055	0.029				0.355085	-0.00551102
1404	0.92	-0.00042	0.039				0.466684	-0.00420842
1605	1.24	0.00077	0.055				0.629008	0.00771543
1805	1.52	0.00367	0.078				0.771042	0.0367735
2005	1.5	0.00727	0.111				0.760897	0.0728457
2206	1.66	0.01162	0.16				0.842059	0.116433
2406	1.94	0.01902	0.232				0.984094	0.190581
2607	2.16	0.02614	0.325				1.09569	0.261924
2807	2.44	0.03255	0.425				1.23773	0.326152
3007	2.74	0.03854	0.5				1.38991	0.386172
3208	2.96	0.04366	0.571				1.5015	0.437475
3408	3.2	0.04758	0.648				1.62325	0.476754
3609	3.4	0.04991	0.744				1.7247	0.5001
3809	3.48	0.05118	0.904				1.76528	0.512826
4009	3.76	0.05158	1.224				1.90732	0.516834
4211	4.06	0.05148	1.683				2.05949	0.515832
4412	4.16	0.05134	1.886				2.11022	0.514429
4612	4.24	0.05182	2.061				2.1508	0.519238
4813	4.38	0.05207	2.4				2.22182	0.521743
5013	4.44	0.05285	2.487				2.25226	0.529559
5213	4.84	0.05491	2.557				2.45516	0.5502
5414	5.04	0.05704	2.664				2.55661	0.571543
5614	5.48	0.05868	2.764				2.77981	0.587976
5815	5.54	0.05946	2.863				2.81025	0.595792
6015	5.74	0.05999	2.963				2.9117	0.601102
6215	5.8	0.06047	3.062				2.94214	0.605912
6416	5.92	0.06103	3.165				3.00301	0.611523
6616	6.16	0.06154	3.264				3.12475	0.616633
6817	6.46	0.06244	3.365				3.27693	0.625651
7017	6.76	0.06333	3.465				3.42911	0.634569
7217	7	0.06405	3.565				3.55085	0.641784
7419	7.28	0.06445	3.666				3.69289	0.645792
7620	7.28	0.06465	3.769				3.69289	0.647796
7820	7.44	0.0648	3.868				3.77405	0.649299
8021	7.66	0.06492	3.97				3.88565	0.650501
8221	7.78	0.06518	4.065				3.94652	0.653106
8421	8.08	0.06607	4.169				4.0987	0.662024
8622	8.36	0.06717	4.264				4.24073	0.673046
8822	8.5	0.06772	4.365				4.31175	0.678557
9023	8.62	0.06788	4.464				4.37262	0.68016
9223	8.78	0.06823	4.569				4.45378	0.683667
9423	8.98	0.06876	4.665				4.55524	0.688978
9624	9.2	0.06948	4.768				4.66684	0.696192
9824	9.52	0.07077	4.868				4.82916	0.709118
10025	9.76	0.07188	4.969				4.9509	0.72024
10225	10.1	0.07276	5.072				5.12337	0.729058
10425	10.02	0.07319	5.167				5.08279	0.733367
10627	10.26	0.07351	5.269				5.20454	0.736573
10828	10.32	0.07389	5.37				5.23497	0.740381
11028	10.58	0.0744	5.471				5.36686	0.745491
11229	10.86	0.0753	5.57				5.50889	0.754509
11429	11.18	0.07619	5.673				5.67122	0.763427
11629	11.4	0.07701	5.772				5.78282	0.771643
11830	11.64	0.07763	5.871				5.90456	0.777856
12030	11.84	0.07836	5.972				6.00601	0.78517
12231	11.96	0.07911	6.072				6.06689	0.792685
12431	12.12	0.07946	6.17				6.14805	0.796192
12631	12.2	0.07993	6.271				6.18863	0.800902
12832	12.42	0.08035	6.372				6.30023	0.80511
13032	12.62	0.08108	6.475				6.40168	0.812425
13233	12.9	0.08188	6.571				6.54372	0.820441
13433	13.16	0.08249	6.672				6.6756	0.826553
13633	13.36	0.08322	6.771				6.77706	0.833868
13835	13.54	0.08406	6.876				6.86836	0.842285
14036	13.8	0.08487	6.973				7.00025	0.850401
14236	13.96	0.08541	7.071				7.08142	0.855812
14437	14.14	0.08615	7.171				7.17272	0.863226
14637	14.36	0.08677	7.273				7.28432	0.869439
14837	14.64	0.08738	7.371				7.42636	0.875551
15038	14.76	0.08793	7.472				7.48723	0.881062
15238	15.04	0.08864	7.576				7.62926	0.888176
15439	15.22	0.08917	7.677				7.72057	0.893487
15639	15.36	0.08972	7.775				7.79159	0.898998
15839	15.64	0.09023	7.875				7.93362	0.904108
16040	15.78	0.09078	7.972				8.00464	0.909619
16240	15.98	0.09141	8.077				8.10609	0.915932
16441	16.04	0.09189	8.174				8.13653	0.920741
16641	16.28	0.0923	8.271				8.25827	0.92485
16841	16.44	0.09295	8.373				8.33943	0.931363
17043	16.64	0.09338	8.477				8.44089	0.935671
17244	16.86	0.0938	8.577				8.55248	0.93988
17444	16.96	0.09456	8.675				8.60321	0.947495
17645	17.3	0.09504	8.775				8.77568	0.952305
17845	17.46	0.09539	8.875				8.85684	0.955812
18045	17.58	0.09615	8.976				8.91771	0.963427
18246	17.84	0.09666	9.004				9.0496	0.968537
18320	18	0.0969	9.007				9.13077	0.970942
18353	17.98	0.09701	9.003				9.12062	0.972044
18553	18.08	0.09767	8.981				9.17135	0.978657
18753	18.32	0.09819	8.982				9.29309	0.983868
18953	18.42	0.09885	8.983				9.34382	0.990481
19153	18.64	0.09978	8.981				9.45541	0.9998
19353	18.94	0.10097	8.983				9.60759	1.01172
19553	19.16	0.10199	8.981				9.71919	1.02194
19753	19.4	0.10301	8.984				9.84094	1.03216
19953	19.52	0.10377	8.98				9.90181	1.03978
20153	19.74	0.10459	8.983				10.0134	1.048
20353	19.96	0.10551	8.985				10.125	1.05721
20553	20.12	0.10646	8.98				10.2062	1.06673
20753	20.34	0.10738	8.985				10.3178	1.07595
20953	20.62	0.10838	8.983				10.4598	1.08597
21153	20.78	0.10923	8.984				10.541	1.09449
21353	21	0.11015	8.982				10.6526	1.10371
21553	21.14	0.1112	8.982				10.7236	1.11423
21753	21.46	0.11199	8.982				10.8859	1.12214
21953	21.62	0.11293	8.982				10.9671	1.13156
22153	21.9	0.11393	8.982				11.1091	1.14158
22353	22.1	0.11486	8.982				11.2106	1.1509
22553	22.32	0.11579	8.979				11.3221	1.16022
22753	22.64	0.11678	8.98				11.4845	1.17014
22953	22.88	0.11769	8.982				11.6062	1.17926
23153	23.14	0.1186	8.982				11.7381	1.18838
23353	23.34	0.11953	8.982				11.8396	1.1977
23553	23.44	0.1205	8.983				11.8903	1.20741
23753	23.64	0.12143	8.982				11.9917	1.21673
23953	23.82	0.12226	8.981				12.083	1.22505
24153	23.98	0.12321	8.984				12.1642	1.23457
24353	24.22	0.12412	8.981				12.286	1.24369
24553	24.46	0.12504	8.984				12.4077	1.25291
24753	24.66	0.12587	8.982				12.5091	1.26122
24953	24.88	0.12669	8.982				12.6207	1.26944
25153	25.18	0.12779	8.984				12.7729	1.28046
25353	25.38	0.12852	8.984				12.8744	1.28778
25553	25.66	0.12942	8.982				13.0164	1.29679
25753	25.74	0.13039	8.982				13.057	1.30651
25953	26.02	0.13129	8.983				13.199	1.31553
26153	26.12	0.13226	8.983				13.2498	1.32525
26353	26.48	0.13313	8.982				13.4324	1.33397
26553	26.56	0.134	8.983				13.473	1.34269
26753	26.88	0.13489	8.981				13.6353	1.3516
26953	26.98	0.13596	8.982				13.686	1.36232
27153	27.18	0.13679	8.981				13.7875	1.37064
27353	27.5	0.13767	8.982				13.9498	1.37946
27553	27.64	0.13863	8.98				14.0208	1.38908
27753	27.84	0.13946	8.982				14.1223	1.39739
27953	28.1	0.14046	8.982				14.2541	1.40741
28153	28.34	0.14138	8.979				14.3759	1.41663
28353	28.62	0.14248	8.982				14.5179	1.42766
28553	28.88	0.14329	8.984				14.6498	1.43577
28753	29.1	0.14441	8.98				14.7614	1.44699
28953	29.3	0.14534	8.982				14.8629	1.45631
29153	29.58	0.14625	8.982				15.0049	1.46543
29353	29.76	0.14718	8.984				15.0962	1.47475
29553	29.94	0.14792	8.982				15.1875	1.48216
29753	30.08	0.14887	8.983				15.2585	1.49168
29953	30.34	0.14968	8.983				15.3904	1.4998
30153	30.6	0.15059	8.983				15.5223	1.50892
30353	30.74	0.15154	8.981				15.5933	1.51844
30553	31.06	0.15243	8.982				15.7556	1.52735
30753	31.22	0.15337	8.982				15.8368	1.53677
30953	31.38	0.15442	8.981				15.918	1.54729
31153	31.66	0.15522	8.98				16.06	1.55531
31353	31.84	0.15626	8.983				16.1513	1.56573
31553	32.04	0.15709	8.981				16.2528	1.57405
31753	32.2	0.15813	8.979				16.3339	1.58447
31953	32.48	0.15903	8.979				16.476	1.59349
32153	32.8	0.15982	8.981				16.6383	1.6014
32353	33	0.16085	8.984				16.7397	1.61172
32553	33.16	0.16179	8.982				16.8209	1.62114
32753	33.3	0.16254	8.984				16.8919	1.62866
32953	33.62	0.16353	8.983				17.0542	1.63858
33153	33.88	0.16444	8.983				17.1861	1.6477
33353	34.06	0.16528	8.984				17.2774	1.65611
33553	34.26	0.16621	8.981				17.3789	1.66543
33753	34.5	0.16712	8.983				17.5006	1.67455
33953	34.68	0.16806	8.984				17.5919	1.68397
34153	35.04	0.16894	8.983				17.7746	1.69279
34353	35.16	0.16989	8.983				17.8354	1.7023
34553	35.44	0.1709	8.982				17.9775	1.71242
34753	35.6	0.17184	8.984				18.0586	1.72184
34953	35.82	0.17266	8.983				18.1702	1.73006
35153	36.06	0.17368	8.985				18.292	1.74028
35353	36.26	0.17471	8.982				18.3934	1.7506
35553	36.58	0.1756	8.982				18.5557	1.75952
35753	36.8	0.17662	8.982				18.6673	1.76974
35953	36.98	0.17766	8.982				18.7586	1.78016
36153	37.3	0.17844	8.982				18.921	1.78798
36353	37.44	0.1795	8.984				18.992	1.7986
36553	37.6	0.18034	8.98				19.0732	1.80701
36753	37.86	0.18135	8.981				19.205	1.81713
36953	38.22	0.18202	8.984				19.3877	1.82385
37153	38.32	0.18299	8.98				19.4384	1.83357
37353	38.48	0.18383	8.983				19.5195	1.84198
37553	38.74	0.18494	8.981				19.6514	1.85311
37753	39	0.18575	8.984				19.7833	1.86122
37953	39.22	0.18667	8.983				19.8949	1.87044
38153	39.34	0.18753	8.981				19.9558	1.87906
38353	39.56	0.18835	8.982				20.0674	1.88727
38553	39.82	0.18926	8.979				20.1993	1.89639
38753	40.04	0.19029	8.982				20.3109	1.90671
38953	40.22	0.19112	8.98				20.4022	1.91503
39153	40.56	0.1921	8.982				20.5747	1.92485
39353	40.72	0.19305	8.981				20.6558	1.93437
39553	40.92	0.19408	8.98				20.7573	1.94469
39753	41.2	0.19508	8.981				20.8993	1.95471
39953	41.4	0.19591	8.982				21.0008	1.96303
40153	41.64	0.19693	8.984				21.1225	1.97325
40353	41.84	0.19776	8.982				21.224	1.98156
40553	42.02	0.19869	8.981				21.3153	1.99088
40753	42.26	0.19971	8.98				21.437	2.0011
40953	42.46	0.20064	8.98				21.5385	2.01042
41153	42.62	0.20148	8.987				21.6196	2.01884
41353	42.94	0.20227	8.981				21.7819	2.02675
41553	43.06	0.20333	8.979				21.8428	2.03737
41753	43.34	0.20433	8.978				21.9849	2.04739
41953	43.62	0.20513	8.979				22.1269	2.05541
42153	43.8	0.20617	8.982				22.2182	2.06583
42353	44.02	0.20699	8.979				22.3298	2.07405
42553	44.28	0.208	8.988				22.4617	2.08417
42753	44.48	0.20893	8.978				22.5631	2.09349
42953	44.68	0.20986	8.983				22.6646	2.10281
43153	44.9	0.21058	8.98				22.7762	2.11002
43353	44.98	0.21156	8.982				22.8168	2.11984
43553	45.24	0.21247	8.981				22.9487	2.12896
43753	45.42	0.2134	8.981				23.04	2.13828
43953	45.62	0.21433	8.982				23.1414	2.1476
44153	46	0.215	8.982				23.3342	2.15431
44353	46.24	0.21612	8.982				23.4559	2.16553
44553	46.38	0.21717	8.982				23.5269	2.17605
44753	46.56	0.218	8.98				23.6182	2.18437
44953	46.82	0.21911	8.983				23.7501	2.19549
45153	47.1	0.22001	8.983				23.8922	2.20451
45353	47.3	0.22084	8.982				23.9936	2.21283
45553	47.46	0.22189	8.981				24.0748	2.22335
45753	47.68	0.22261	8.984				24.1864	2.23056
45953	47.78	0.22358	8.98				24.2371	2.24028
46153	48.04	0.22449	8.981				24.369	2.2494
46353	48.2	0.22533	8.981				24.4502	2.25782
46553	48.44	0.22635	8.983				24.5719	2.26804
46753	48.66	0.22727	8.982				24.6835	2.27725
46953	48.94	0.22827	8.982				24.8255	2.28727
47153	49.18	0.22909	8.98				24.9473	2.29549
47353	49.36	0.23002	8.981				25.0386	2.30481
47553	49.64	0.23103	8.983				25.1806	2.31493
47753	49.8	0.23187	8.98				25.2618	2.32335
47953	50.1	0.23276	8.981				25.414	2.33226
48153	50.2	0.23383	8.983				25.4647	2.34299
48353	50.44	0.23465	8.98				25.5864	2.3512
48553	50.7	0.23555	8.983				25.7183	2.36022
48753	50.9	0.23648	8.984				25.8198	2.36954
48953	51.12	0.23751	8.98				25.9314	2.37986
49153	51.4	0.23851	8.986				26.0734	2.38988
49353	51.62	0.23943	8.981				26.185	2.3991
49553	51.74	0.24029	8.984				26.2459	2.40772
49753	51.98	0.24111	8.98				26.3676	2.41593
49953	52.18	0.24204	8.981				26.4691	2.42525
50153	52.42	0.24305	8.982				26.5908	2.43537
50353	52.6	0.24389	8.983				26.6821	2.44379
50553	52.84	0.24481	8.983				26.8039	2.45301
50753	53	0.24575	8.983				26.885	2.46242
50953	53.3	0.24674	8.981				27.0372	2.47234
51153	53.46	0.24769	8.985				27.1184	2.48186
51353	53.66	0.24862	8.98				27.2198	2.49118
51553	53.94	0.24942	8.981				27.3619	2.4992
51753	54.2	0.25033	8.983				27.4937	2.50832
51953	54.16	0.25124	8.984				27.4735	2.51743
52153	54.46	0.25214	8.982				27.6256	2.52645
52353	54.68	0.25306	8.984				27.7372	2.53567
52553	54.88	0.25409	8.984				27.8387	2.54599
52753	55.06	0.25503	8.983				27.93	2.55541
52953	55.38	0.25582	8.982				28.0923	2.56333
53153	55.58	0.25695	8.985				28.1938	2.57465
53353	55.7	0.2578	8.98				28.2546	2.58317
53553	55.94	0.25872	8.983				28.3764	2.59238
53753	56.2	0.25953	8.982				28.5083	2.6005
53953	56.36	0.26067	8.983				28.5894	2.61192
54153	56.52	0.26142	8.981				28.6706	2.61944
54353	56.82	0.26231	8.983				28.8228	2.62836
54553	56.96	0.26326	8.982				28.8938	2.63788
54753	57.24	0.26427	8.982				29.0358	2.648
54953	57.46	0.26519	8.983				29.1474	2.65721
55153	57.64	0.26633	8.983				29.2387	2.66864
55353	57.92	0.26723	8.983				29.3808	2.67766
55553	58.04	0.26819	8.98				29.4416	2.68727
55753	58.28	0.269	8.984				29.5634	2.69539
55953	58.5	0.26992	8.983				29.675	2.70461
56153	58.66	0.27087	8.985				29.7561	2.71413
56353	58.84	0.27181	8.984				29.8475	2.72355
56553	59.14	0.2727	8.981				29.9996	2.73246
56753	59.36	0.27362	8.982				30.1112	2.74168
56953	59.54	0.27456	8.981				30.2025	2.7511
57153	59.62	0.27553	8.981				30.2431	2.76082
57353	59.86	0.27645	8.984				30.3649	2.77004
57553	60.1	0.27736	8.984				30.4866	2.77916
57753	60.38	0.27817	8.98				30.6286	2.78727
57953	60.56	0.279	8.98				30.72	2.79559
58153	60.88	0.28009	8.981				30.8823	2.80651
58353	61.04	0.28094	8.982				30.9634	2.81503
58553	61.34	0.28183	8.984				31.1156	2.82395
58753	61.42	0.2827	8.982				31.1562	2.83267
58953	61.6	0.28364	8.983				31.2475	2.84208
59153	61.82	0.28446	8.983				31.3591	2.8503
59353	62.06	0.28548	8.98				31.4808	2.86052
59553	62.26	0.28631	8.979				31.5823	2.86884
59753	62.44	0.28715	8.978				31.6736	2.87725
59953	62.62	0.28818	8.982				31.7649	2.88758
60153	62.78	0.28903	8.983				31.8461	2.89609
60353	63.18	0.28999	8.982				32.049	2.90571
60553	63.38	0.29102	8.981				32.1504	2.91603
60753	63.54	0.29196	8.978				32.2316	2.92545
60953	63.72	0.2929	8.979				32.3229	2.93487
61153	63.92	0.29393	8.982				32.4244	2.94519
61353	64.2	0.29483	8.98				32.5664	2.95421
61553	64.42	0.29575	8.983				32.678	2.96343
61753	64.56	0.2967	8.982				32.749	2.97295
61953	64.7	0.29755	8.978				32.82	2.98146
62153	64.98	0.29846	8.982				32.9621	2.99058
62353	65.16	0.29939	8.981				33.0534	2.9999
62553	65.3	0.30034	8.98				33.1244	3.00942
62753	65.6	0.30114	8.982				33.2766	3.01743
62953	65.82	0.30206	8.981				33.3882	3.02665
63153	65.92	0.30313	8.98				33.4389	3.03737
63353	66.18	0.30394	8.979				33.5708	3.04549
63553	66.38	0.30517	8.982				33.6722	3.05782
63753	66.7	0.30605	8.979				33.8346	3.06663
63953	66.86	0.307	8.979				33.9157	3.07615
64153	66.98	0.30806	8.984				33.9766	3.08677
64353	67.3	0.30884	8.982				34.1389	3.09459
64553	67.44	0.3099	8.983				34.2099	3.10521
64753	67.64	0.31083	8.984				34.3114	3.11453
64953	67.78	0.31158	8.982				34.3824	3.12204
65153	67.86	0.31245	8.982				34.423	3.13076
65353	68.12	0.31326	8.982				34.5549	3.13888
65553	68.38	0.31417	8.98				34.6868	3.148
65753	68.56	0.3153	8.98				34.7781	3.15932
65953	68.78	0.31623	8.982				34.8897	3.16864
66153	68.94	0.31727	8.979				34.9708	3.17906
66353	69.22	0.31807	8.982				35.1129	3.18707
66553	69.48	0.31908	8.98				35.2448	3.19719
66753	69.6	0.31994	8.982				35.3056	3.20581
66953	69.76	0.32088	8.986				35.3868	3.21523
67153	69.92	0.32163	8.98				35.4679	3.22275
67353	70.08	0.32267	8.981				35.5491	3.23317
67553	70.38	0.32357	8.983				35.7013	3.24218
67753	70.5	0.32462	8.982				35.7622	3.25271
67953	70.8	0.32552	8.981				35.9143	3.26172
68153	70.98	0.32626	8.978				36.0057	3.26914
68353	71.2	0.32728	8.981				36.1172	3.27936
68553	71.42	0.3281	8.98				36.2288	3.28758
68753	71.54	0.32906	8.979				36.2897	3.29719
68953	71.76	0.32988	8.981				36.4013	3.30541
69153	71.96	0.33081	8.984				36.5028	3.31473
69353	72.16	0.33184	8.982				36.6042	3.32505
69553	72.46	0.33294	8.981				36.7564	3.33607
69753	72.7	0.33405	8.983				36.8781	3.34719
69953	72.94	0.33507	8.98				36.9999	3.35741
70153	73.14	0.3359	8.98				37.1013	3.36573
70353	73.24	0.33677	8.979				37.1521	3.37445
70553	73.36	0.33762	8.982				37.2129	3.38297
70753	73.6	0.33844	8.983				37.3347	3.39118
70953	73.76	0.33938	8.981				37.4158	3.4006
71153	74	0.3402	8.979				37.5376	3.40882
71353	74.14	0.34115	8.983				37.6086	3.41834
71553	74.32	0.34209	8.982				37.6999	3.42776
71753	74.6	0.34299	8.984				37.8419	3.43677
71953	74.8	0.34392	8.98				37.9434	3.44609
72153	74.98	0.34486	8.984				38.0347	3.45551
72353	75.22	0.34587	8.982				38.1565	3.46563
72553	75.42	0.3468	8.982				38.2579	3.47495
72753	75.66	0.34762	8.983				38.3796	3.48317
72953	75.8	0.34877	8.982				38.4507	3.49469
73153	75.92	0.34973	8.981				38.5115	3.50431
73353	76.18	0.35064	8.981				38.6434	3.51343
73553	76.42	0.35135	8.982				38.7652	3.52054
73753	76.64	0.35238	8.983				38.8768	3.53086
73953	76.72	0.35355	8.982				38.9174	3.54259
74153	76.92	0.35448	8.981				39.0188	3.5519
74353	77.16	0.35519	8.982				39.1405	3.55902
74553	77.28	0.35615	8.982				39.2014	3.56864
74753	77.5	0.35697	8.982				39.313	3.57685
74953	77.78	0.35788	8.983				39.4551	3.58597
75153	77.94	0.35882	8.982				39.5362	3.59539
75353	78.16	0.35964	8.982				39.6478	3.60361
75553	78.38	0.36067	8.982				39.7594	3.61393
75753	78.58	0.3617	8.984				39.8609	3.62425
75953	78.84	0.36261	8.982				39.9928	3.63337
76153	79.02	0.36364	8.98				40.0841	3.64369
76353	79.2	0.36448	8.983				40.1754	3.6521
76553	79.34	0.36553	8.982				40.2464	3.66263
76753	79.56	0.36635	8.984				40.358	3.67084
76953	79.8	0.36717	8.986				40.4797	3.67906
77153	79.92	0.36813	8.981				40.5406	3.68868
77353	80.18	0.36904	8.979				40.6725	3.6978
77553	80.44	0.36995	8.984				40.8044	3.70691
77753	80.52	0.37072	8.984				40.845	3.71463
77953	80.72	0.37165	8.981				40.9464	3.72395
78153	80.9	0.37278	8.983				41.0377	3.73527
78353	81.12	0.37381	8.982				41.1493	3.74559
78553	81.4	0.37461	8.98				41.2913	3.75361
78753	81.54	0.37556	8.982				41.3624	3.76313
78953	81.76	0.37648	8.982				41.474	3.77234
79153	81.88	0.37744	8.98				41.5348	3.78196
79353	82.08	0.37837	8.982				41.6363	3.79128
79553	82.32	0.37919	8.982				41.758	3.7995
79753	82.46	0.38024	8.985				41.829	3.81002
79953	82.74	0.38124	8.982				41.9711	3.82004
80153	82.98	0.38236	8.985				42.0928	3.83126
80353	83.16	0.38339	8.983				42.1841	3.84158
80553	83.42	0.3842	8.982				42.316	3.8497
80753	83.46	0.38519	8.982				42.3363	3.85962
80953	83.68	0.38611	8.981				42.4479	3.86884
81153	83.9	0.38693	8.982				42.5595	3.87705
81353	84.02	0.38789	8.979				42.6204	3.88667
81553	84.26	0.38871	8.98				42.7421	3.89489
81753	84.36	0.38967	8.981				42.7929	3.90451
81953	84.58	0.3905	8.978				42.9045	3.91283
82153	84.78	0.39153	8.98				43.0059	3.92315
82353	85.02	0.39234	8.981				43.1276	3.93126
82553	85.1	0.39321	8.981				43.1682	3.93998
82753	85.44	0.3941	8.981				43.3407	3.9489
82953	85.58	0.39505	8.984				43.4117	3.95842
83153	85.84	0.39596	8.982				43.5436	3.96754
83353	85.98	0.39681	8.98				43.6146	3.97605
83553	86.28	0.3977	8.979				43.7668	3.98497
83753	86.34	0.39868	8.983				43.7972	3.99479
83953	86.68	0.39956	8.982				43.9697	4.00361
84153	86.8	0.40072	8.982				44.0306	4.01523
84353	87.12	0.40151	8.983				44.1929	4.02315
84553	87.16	0.40279	8.983				44.2132	4.03597
84753	87.4	0.40371	8.984				44.3349	4.04519
84953	87.64	0.40453	8.983				44.4567	4.05341
85153	87.82	0.40556	8.983				44.548	4.06373
85353	88.04	0.40639	8.982				44.6596	4.07204
85553	88.3	0.40729	8.985				44.7915	4.08106
85753	88.38	0.40827	8.979				44.8321	4.09088
85953	88.56	0.4091	8.981				44.9234	4.0992
86153	88.78	0.40993	8.981				45.035	4.10752
86353	88.84	0.41091	8.982				45.0654	4.11733
86553	89.04	0.41174	8.984				45.1669	4.12565
86753	89.2	0.41278	8.984				45.248	4.13607
86953	89.4	0.41371	8.98				45.3495	4.14539
87153	89.58	0.41455	8.982				45.4408	4.15381
87353	89.82	0.41556	8.981				45.5625	4.16393
87553	90.04	0.41659	8.98				45.6741	4.17425
87753	90.24	0.41752	8.983				45.7756	4.18357
87953	90.46	0.41834	8.982				45.8872	4.19178
88153	90.64	0.41938	8.983				45.9785	4.2022
88353	90.88	0.42029	8.982				46.1002	4.21132
88553	91.04	0.42134	8.983				46.1814	4.22184
88753	91.16	0.42219	8.983				46.2423	4.23036
88953	91.5	0.42307	8.982				46.4147	4.23918
89153	91.56	0.42415	8.98				46.4452	4.25
89353	91.64	0.42503	8.984				46.4857	4.25882
89553	91.9	0.42583	8.984				46.6176	4.26683
89753	92.08	0.42677	8.983				46.7089	4.27625
89953	92.24	0.42762	8.983				46.7901	4.28477
90153	92.42	0.42865	8.981				46.8814	4.29509
90353	92.54	0.42951	8.982				46.9423	4.30371
90553	92.7	0.43055	8.98				47.0234	4.31413
90753	92.88	0.43149	8.982				47.1147	4.32355
90953	93.06	0.43243	8.982				47.2061	4.33297
91153	93.4	0.43331	8.982				47.3785	4.34178
91353	93.52	0.43437	8.983				47.4394	4.3524
91553	93.74	0.43549	8.982				47.551	4.36363
91753	93.9	0.43643	8.98				47.6322	4.37305
91953	94.2	0.43743	8.983				47.7843	4.38307
92153	94.26	0.43831	8.982				47.8148	4.39188
92353	94.46	0.43934	8.98				47.9162	4.4022
92553	94.66	0.44017	8.982				48.0177	4.41052
92753	94.78	0.44113	8.983				48.0786	4.42014
92953	94.92	0.44198	8.982				48.1496	4.42866
93153	95.18	0.44289	8.983				48.2815	4.43778
93353	95.26	0.44376	8.983				48.322	4.44649
93553	95.5	0.44467	8.983				48.4438	4.45561
93753	95.64	0.44543	8.984				48.5148	4.46323
93953	95.84	0.44656	8.982				48.6163	4.47455
94153	96.08	0.44737	8.98				48.738	4.48267
94353	96.22	0.44842	8.984				48.809	4.49319
94553	96.34	0.44938	8.98				48.8699	4.50281
94753	96.5	0.45032	8.981				48.951	4.51222
94953	96.74	0.45124	8.98				49.0728	4.52144
95153	96.84	0.45211	8.98				49.1235	4.53016
95353	97.06	0.45293	8.981				49.2351	4.53838
95553	97.28	0.45385	8.981				49.3467	4.5476
95753	97.36	0.45482	8.979				49.3873	4.55731
95953	97.5	0.45577	8.981				49.4583	4.56683
96153	97.72	0.4566	8.98				49.5699	4.57515
96353	97.9	0.45753	8.985				49.6612	4.58447
96553	98.08	0.45837	8.984				49.7525	4.59289
96753	98.32	0.45959	8.981				49.8743	4.60511
96953	98.5	0.46072	8.98				49.9656	4.61643
97153	98.84	0.46191	8.982				50.138	4.62836
97353	98.94	0.46287	8.982				50.1888	4.63798
97553	99.1	0.46381	8.98				50.2699	4.64739
97753	99.26	0.46476	8.98				50.3511	4.65691
97953	99.44	0.4657	8.979				50.4424	4.66633
98153	99.52	0.46647	8.984				50.483	4.67405
98353	99.7	0.4674	8.982				50.5743	4.68337
98553	99.78	0.46828	8.979				50.6149	4.69218
98753	100.08	0.46907	8.982				50.7671	4.7001
98953	100.18	0.47004	8.983				50.8178	4.70982
99153	100.42	0.47095	8.98				50.9395	4.71894
99353	100.56	0.4718	8.98				51.0105	4.72745
99553	100.76	0.47273	8.984				51.112	4.73677
99753	100.88	0.47359	8.982				51.1729	4.74539
99953	101.04	0.47454	8.981				51.254	4.75491
100153	101.16	0.47549	8.983				51.3149	4.76443
100353	101.28	0.47655	8.981				51.3758	4.77505
100553	101.44	0.4773	8.981				51.4569	4.78257
100753	101.64	0.47833	8.98				51.5584	4.79289
100953	101.8	0.47937	8.982				51.6395	4.80331
101153	101.92	0.48023	8.982				51.7004	4.81192
101353	102.2	0.48123	8.983				51.8425	4.82194
101553	102.38	0.48227	8.982				51.9338	4.83236
101753	102.4	0.48306	8.983				51.9439	4.84028
101953	102.62	0.48408	8.98				52.0555	4.8505
102153	102.82	0.48521	8.98				52.157	4.86182
102353	103.1	0.48591	8.984				52.299	4.86884
102553	103.24	0.48697	8.982				52.37	4.87946
102753	103.38	0.48792	8.982				52.441	4.88898
102953	103.54	0.48886	8.982				52.5222	4.8984
103153	103.64	0.48983	8.982				52.5729	4.90812
103353	103.82	0.49066	8.982				52.6642	4.91643
103553	103.9	0.49153	8.984				52.7048	4.92515
103753	104.14	0.49235	8.983				52.8265	4.93337
103953	104.16	0.49344	8.981				52.8367	4.94429
104153	104.42	0.49425	8.983				52.9686	4.9524
104353	104.56	0.4952	8.981				53.0396	4.96192
104553	104.74	0.49624	8.984				53.1309	4.97234
104753	104.82	0.49721	8.984				53.1715	4.98206
104953	105.06	0.49813	8.984				53.2932	4.99128
105153	105.3	0.49934	8.98				53.415	5.00341
105353	105.42	0.5003	8.98				53.4758	5.01303
105553	105.54	0.50126	8.982				53.5367	5.02265
105753	105.76	0.50218	8.98				53.6483	5.03186
105953	105.88	0.50314	8.981				53.7092	5.04148
106153	106.04	0.50409	8.982				53.7904	5.051
106353	106.08	0.50497	8.979				53.8106	5.05982
106553	106.34	0.50598	8.981				53.9425	5.06994
106753	106.5	0.50682	8.984				54.0237	5.07836
106953	106.6	0.50769	8.98				54.0744	5.08707
107153	106.76	0.50863	8.981				54.1556	5.09649
107353	106.9	0.50948	8.981				54.2266	5.10501
107553	107	0.51055	8.98				54.2773	5.11573
107753	107.26	0.51146	8.982				54.4092	5.12485
107953	107.38	0.51242	8.981				54.4701	5.13447
108153	107.44	0.5133	8.981				54.5005	5.14329
108353	107.7	0.5142	8.982				54.6324	5.1523
108553	107.82	0.51516	8.98				54.6933	5.16192
108753	108.04	0.51599	8.98				54.8049	5.17024
108953	108.28	0.5169	8.978				54.9266	5.17936
109153	108.4	0.51786	8.978				54.9875	5.18898
109353	108.52	0.51882	8.983				55.0484	5.1986
109553	108.64	0.51988	8.98				55.1092	5.20922
109753	108.78	0.52073	8.984				55.1803	5.21774
109953	109.02	0.52184	8.982				55.302	5.22886
110153	109.12	0.52281	8.984				55.3527	5.23858
110353	109.28	0.52385	8.978				55.4339	5.249
110553	109.48	0.52488	8.981				55.5353	5.25932
110753	109.72	0.5256	8.978				55.6571	5.26653
110953	109.78	0.52658	8.982				55.6875	5.27635
111153	109.98	0.52761	8.981				55.789	5.28667
111353	110	0.5285	8.982				55.7991	5.29559
111553	110.14	0.52935	8.982				55.8701	5.30411
111753	110.34	0.53038	8.983				55.9716	5.31443
111953	110.42	0.53135	8.98				56.0122	5.32415
112153	110.66	0.53217	8.981				56.1339	5.33236
112353	110.72	0.53315	8.986				56.1644	5.34218
112553	110.88	0.53409	8.981				56.2455	5.3516
112753	110.98	0.53506	8.982				56.2962	5.36132
112953	111.16	0.53599	8.979				56.3875	5.37064
113153	111.26	0.53706	8.98				56.4383	5.38136
113353	111.46	0.53779	8.982				56.5397	5.38868
113553	111.6	0.53894	8.982				56.6107	5.4002
113753	111.76	0.53968	8.98				56.6919	5.40762
113953	111.9	0.54063	8.982				56.7629	5.41713
114153	112	0.5416	8.982				56.8136	5.42685
114353	112.14	0.54265	8.98				56.8847	5.43737
114553	112.3	0.54369	8.982				56.9658	5.4478
114753	112.42	0.54475	8.983				57.0267	5.45842
114953	112.56	0.5456	8.978				57.0977	5.46693
115153	112.82	0.54671	8.982				57.2296	5.47806
115353	112.86	0.5477	8.98				57.2499	5.48798
115553	113.1	0.54851	8.979				57.3716	5.49609
115753	113.18	0.54949	8.984				57.4122	5.50591
115953	113.32	0.55034	8.981				57.4832	5.51443
116153	113.44	0.5513	8.979				57.5441	5.52405
116353	113.6	0.55224	8.984				57.6253	5.53347
116553	113.78	0.55318	8.983				57.7166	5.54289
116753	113.9	0.55393	8.979				57.7775	5.5504
116953	114	0.555	8.982				57.8282	5.56112
117153	114.26	0.55581	8.98				57.9601	5.56924
117353	114.34	0.55678	8.984				58.0006	5.57896
117553	114.44	0.55775	8.982				58.0514	5.58868
117753	114.6	0.55879	8.981				58.1325	5.5991
117953	114.72	0.55965	8.982				58.1934	5.60772
118153	114.84	0.56061	8.979				58.2543	5.61733
118353	114.92	0.56158	8.978				58.2949	5.62705
118553	115.16	0.56249	8.981				58.4166	5.63617
118753	115.28	0.56355	8.98				58.4775	5.64679
118953	115.46	0.56439	8.98				58.5688	5.65521
119153	115.58	0.56545	8.982				58.6297	5.66583
119353	115.66	0.56652	8.981				58.6702	5.67655
119553	115.82	0.56746	8.981				58.7514	5.68597
119753	115.92	0.56843	8.979				58.8021	5.69569
119953	116.06	0.56928	8.982				58.8731	5.70421
120153	116.2	0.57043	8.98				58.9442	5.71573
120353	116.3	0.57119	8.978				58.9949	5.72335
120553	116.38	0.57227	8.982				59.0355	5.73417
120753	116.54	0.57311	8.982				59.1166	5.74259
120953	116.72	0.57405	8.982				59.2079	5.752
121153	116.86	0.575	8.984				59.279	5.76152
121353	116.9	0.57598	8.982				59.2992	5.77134
121553	116.96	0.57686	8.981				59.3297	5.78016
121753	117.22	0.57787	8.98				59.4616	5.79028
121953	117.28	0.57875	8.982				59.492	5.7991
122153	117.32	0.57964	8.979				59.5123	5.80802
122353	117.56	0.58075	8.98				59.634	5.81914
122553	117.66	0.58162	8.981				59.6848	5.82786
122753	117.84	0.58246	8.979				59.7761	5.83627
122953	117.94	0.58342	8.982				59.8268	5.84589
123153	117.94	0.58442	8.98				59.8268	5.85591
123353	118.16	0.58534	8.982				59.9384	5.86513
123553	118.26	0.58631	8.982				59.9891	5.87485
123753	118.48	0.58733	8.983				60.1007	5.88507
123953	118.66	0.58827	8.98				60.192	5.89449
124153	118.64	0.58928	8.98				60.1819	5.90461
124353	118.82	0.59031	8.982				60.2732	5.91493
124553	119.02	0.59134	8.981				60.3746	5.92525
124753	119.12	0.59241	8.984				60.4254	5.93597
124953	119.3	0.59344	8.982				60.5167	5.94629
125153	119.36	0.59442	8.981				60.5471	5.95611
125353	119.44	0.5954	8.981				60.5877	5.96593
125553	119.36	0.59642	8.98				60.5471	5.97615
125753	119.48	0.59728	8.982				60.608	5.98477
125953	119.6	0.59834	8.981				60.6689	5.99539
126153	119.68	0.59911	8.982				60.7094	6.00311
126353	119.72	0.6001	8.979				60.7297	6.01303
126553	119.86	0.60115	8.984				60.8008	6.02355
126753	119.94	0.60192	8.981				60.8413	6.03126
126953	120.1	0.60296	8.98				60.9225	6.04168
127153	120.12	0.60386	8.982				60.9326	6.0507
127353	120.36	0.60477	8.982				61.0544	6.05982
127553	120.34	0.60578	8.978				61.0442	6.06994
127753	120.54	0.60671	8.983				61.1457	6.07926
127953	120.68	0.60766	8.982				61.2167	6.08878
128153	120.66	0.60887	8.982				61.2066	6.1009
128353	120.9	0.60968	8.983				61.3283	6.10902
128553	120.9	0.61058	8.979				61.3283	6.11804
128753	121.04	0.61154	8.982				61.3993	6.12766
128953	121.02	0.61254	8.984				61.3892	6.13768
129153	121.06	0.61353	8.98				61.4095	6.1476
129353	121.24	0.61437	8.982				61.5008	6.15601
129553	121.34	0.61533	8.982				61.5515	6.16563
129753	121.48	0.61628	8.98				61.6225	6.17515
129953	121.54	0.61736	8.98				61.653	6.18597
130153	121.64	0.61833	8.982				61.7037	6.19569
130353	121.68	0.61931	8.981				61.724	6.20551
130553	121.8	0.62027	8.981				61.7848	6.21513
130753	121.98	0.62121	8.983				61.8762	6.22455
130953	121.92	0.62213	8.98				61.8457	6.23377
131153	121.92	0.62323	8.98				61.8457	6.24479
131353	122.16	0.62404	8.982				61.9675	6.25291
131553	122.22	0.62502	8.981				61.9979	6.26273
131753	122.28	0.626	8.981				62.0283	6.27255
131953	122.34	0.62698	8.982				62.0588	6.28236
132153	122.48	0.62783	8.979				62.1298	6.29088
132353	122.62	0.62888	8.982				62.2008	6.3014
132553	122.7	0.62995	8.983				62.2414	6.31212
132753	122.74	0.63084	8.982				62.2617	6.32104
132953	122.68	0.63186	8.982				62.2312	6.33126
133153	122.46	0.63314	8.98				62.1196	6.34409
133353	122.18	0.63444	8.982				61.9776	6.35711
133553	122.08	0.63567	8.982				61.9269	6.36944
133753	121.98	0.63671	8.984				61.8762	6.37986
133953	121.98	0.63761	8.984				61.8762	6.38888
134153	121.94	0.63872	8.981				61.8559	6.4
134353	122.04	0.63959	8.982				61.9066	6.40872
134553	122.02	0.64049	8.98				61.8964	6.41774
134753	121.9	0.64153	8.984				61.8356	6.42816
134953	121.96	0.64231	8.982				61.866	6.43597
135153	122.04	0.64339	8.984				61.9066	6.44679
135353	122.02	0.64439	8.982				61.8964	6.45681
135553	121.4	0.64601	8.985				61.5819	6.47305
135753	118.86	0.6479	8.98				60.2935	6.49198
135953	118.92	0.64788	8.982				60.3239	6.49178
136153	118.92	0.64788	8.982				60.3239	6.49178
136353	118.52	0.65012	8.98				60.121	6.51423
136553	119.92	0.65163	8.981				60.8312	6.52936
136753	119.78	0.65228	8.982				60.7602	6.53587
136953	119.64	0.65293	8.982				60.6892	6.54238
137153	119.8	0.65387	8.982				60.7703	6.5518
137353	119.84	0.65516	8.982				60.7906	6.56473
137553	119.92	0.65643	8.982				60.8312	6.57745
137753	119.66	0.65762	8.98				60.6993	6.58938
137953	119.24	0.65857	8.983				60.4862	6.5989
138153	114.6	0.66089	8.982				58.1325	6.62214
138353	114.6	0.66089	8.982				58.1325	6.62214
138553	114.94	0.66317	8.983				58.305	6.64499
138753	114.48	0.66413	8.984				58.0717	6.65461
138953	114.12	0.66506	8.981				57.8891	6.66393
139095	103.2	0.67298	9.06				52.3497	6.74329
139295	103.2	0.67298	9.06				52.3497	6.74329
139495	98.72	0.67335	8.983				50.0772	6.74699
139695	98.72	0.67335	8.983				50.0772	6.74699
139896	98.92	0.67558	8.982				50.1786	6.76934
140097	98.86	0.6762	8.978				50.1482	6.77555
140297	99.16	0.67709	8.982				50.3004	6.78447
140497	99.32	0.67814	8.979				50.3815	6.79499
140697	99.58	0.67915	8.981				50.5134	6.80511
140898	99.74	0.68009	8.981				50.5946	6.81453
141099	99.86	0.68085	8.981				50.6555	6.82214
141299	99.94	0.68172	8.979				50.696	6.83086
141499	100.2	0.68253	8.982				50.8279	6.83898
141699	100.28	0.6837	8.982				50.8685	6.8507
141900	100.48	0.68463	8.979				50.97	6.86002
142101	100.74	0.68554	8.984				51.1018	6.86914
142301	100.92	0.68648	8.981				51.1932	6.87856
142501	101.16	0.68729	8.98				51.3149	6.88667
142701	101.26	0.68826	8.982				51.3656	6.89639
142901	101.4	0.68921	8.982				51.4366	6.90591
143101	101.64	0.69013	8.979				51.5584	6.91513
143301	101.82	0.69116	8.982				51.6497	6.92545
143501	102.04	0.69209	8.982				51.7613	6.93477
143701	102.22	0.69302	8.981				51.8526	6.94409
143901	102.42	0.69395	8.983				51.9541	6.95341
144101	102.56	0.6948	8.982				52.0251	6.96192
144301	102.7	0.69585	8.982				52.0961	6.97244
144501	102.94	0.69657	8.981				52.2178	6.97966
144701	103.06	0.69763	8.98				52.2787	6.99028
144901	103.24	0.69847	8.984				52.37	6.9987
145101	103.42	0.6994	8.982				52.4613	7.00802
145301	103.52	0.70047	8.981				52.512	7.01874
145501	103.68	0.70151	8.982				52.5932	7.02916
145701	103.82	0.70256	8.982				52.6642	7.03968
145901	103.94	0.70352	8.982				52.7251	7.0493
146101	104.1	0.70446	8.982				52.8063	7.05872
146301	104.18	0.70524	8.982				52.8468	7.06653
146501	104.26	0.70631	8.978				52.8874	7.07725
146701	104.34	0.70728	8.978				52.928	7.08697
146901	104.48	0.70833	8.98				52.999	7.09749
147101	104.5	0.70922	8.982				53.0092	7.10641
147301	104.5	0.70922	8.982				53.0092	7.10641
147501	104.5	0.70922	8.982				53.0092	7.10641
147701	97.82	0.71476	8.981				49.6206	7.16192
147901	97.88	0.71584	8.98				49.6511	7.17275
148101	97.96	0.71641	8.981				49.6917	7.17846
148301	98.28	0.7175	8.984				49.854	7.18938
148501	98.56	0.7186	8.98				49.996	7.2004
148701	98.74	0.71944	8.983				50.0873	7.20882
148901	98.84	0.72011	8.978				50.138	7.21553
149101	99.08	0.72102	8.98				50.2598	7.22465
149301	99.24	0.72207	8.98				50.341	7.23517
149501	99.4	0.72311	8.979				50.4221	7.24559
149701	99.6	0.72404	8.979				50.5236	7.25491
149901	99.82	0.72496	8.978				50.6352	7.26413
150101	100.04	0.72579	8.982				50.7468	7.27244
150301	100.18	0.72684	8.978				50.8178	7.28297
150501	100.34	0.72768	8.982				50.8989	7.29138
150701	100.5	0.72852	8.981				50.9801	7.2998
150901	100.74	0.72954	8.983				51.1018	7.31002
151101	100.84	0.73031	8.984				51.1526	7.31774
151301	100.98	0.73136	8.981				51.2236	7.32826
151501	101.28	0.73225	8.979				51.3758	7.33717
151701	101.38	0.73322	8.981				51.4265	7.34689
151901	101.52	0.73417	8.981				51.4975	7.35641
152101	101.8	0.73507	8.984				51.6395	7.36543
152301	101.88	0.73614	8.978				51.6801	7.37615
152501	102.1	0.73716	8.981				51.7917	7.38637
152701	102.26	0.73801	8.981				51.8729	7.39489
152901	102.32	0.73889	8.981				51.9033	7.40371
153101	102.54	0.73991	8.978				52.0149	7.41393
153301	102.66	0.74087	8.982				52.0758	7.42355
153501	102.64	0.74188	8.981				52.0657	7.43367
153701	102.86	0.7427	8.981				52.1773	7.44188
153901	102.84	0.74381	8.982				52.1671	7.45301
154101	102.86	0.7448	8.982				52.1773	7.46293
154301	102.88	0.74579	8.981				52.1874	7.47285
154501	101.4	0.74781	8.988				51.4366	7.49309
154701	97.46	0.75009	8.98				49.438	7.51593
154901	97.46	0.75069	8.983				49.438	7.52194
155101	97.84	0.75176	8.983				49.6308	7.53267
155301	97.88	0.75264	8.978				49.6511	7.54148
155501	97.98	0.75341	8.982				49.7018	7.5492
155701	98.16	0.75424	8.978				49.7931	7.55752
155901	98.32	0.75509	8.982				49.8743	7.56603
156101	98.58	0.7562	8.979				50.0062	7.57715
156301	98.82	0.75721	8.981				50.1279	7.58727
156501	99.02	0.75834	8.98				50.2294	7.5986
156701	99.24	0.75927	8.978				50.341	7.60792
156901	99.36	0.76012	8.98				50.4018	7.61643
157101	99.48	0.76118	8.982				50.4627	7.62705
157301	99.7	0.762	8.981				50.5743	7.63527
157501	99.9	0.76303	8.979				50.6757	7.64559
157701	100.02	0.76389	8.982				50.7366	7.65421
157901	100.2	0.76483	8.98				50.8279	7.66363
158101	100.28	0.7656	8.977				50.8685	7.67134
158301	100.44	0.76665	8.982				50.9497	7.68186
158501	100.58	0.7673	8.982				51.0207	7.68838
158701	100.68	0.76836	8.982				51.0714	7.699
158901	101	0.76945	8.984				51.2337	7.70992
159101	101.18	0.77029	8.982				51.325	7.71834
159301	101.22	0.77147	8.979				51.3453	7.73016
159501	101.34	0.77233	8.98				51.4062	7.73878
159701	101.54	0.77326	8.983				51.5077	7.7481
159901	101.64	0.77423	8.981				51.5584	7.75782
160101	101.66	0.77512	8.982				51.5685	7.76673
160301	101.7	0.77621	8.981				51.5888	7.77766
160501	101.88	0.77714	8.985				51.6801	7.78697
160701	101.88	0.77814	8.981				51.6801	7.79699
160901	101.84	0.77916	8.98				51.6598	7.80721
161101	101.8	0.78017	8.98				51.6395	7.81733
161301	101.78	0.78128	8.982				51.6294	7.82846
161501	100.68	0.78316	8.985				51.0714	7.84729
161701	97.06	0.78503	8.982				49.2351	7.86603
161901	96.88	0.78569	8.982				49.1438	7.87265
162101	97.56	0.78695	8.98				49.4887	7.88527
162301	97.56	0.78785	8.981				49.4887	7.89429
162501	97.86	0.78855	8.982				49.6409	7.9013
162701	98	0.7896	8.979				49.7119	7.91182
162901	98.12	0.79046	8.98				49.7728	7.92044
163101	98.24	0.79122	8.982				49.8337	7.92806
163301	98.34	0.79208	8.982				49.8844	7.93667
163501	98.5	0.79302	8.98				49.9656	7.94609
163701	98.76	0.79403	8.982				50.0975	7.95621
163901	98.92	0.79518	8.983				50.1786	7.96774
164101	99.2	0.79608	8.98				50.3207	7.97675
164301	99.28	0.79715	8.983				50.3612	7.98747
164501	99.48	0.79828	8.982				50.4627	7.9988
164701	99.52	0.79917	8.979				50.483	8.00772
164901	99.66	0.80012	8.98				50.554	8.01723
165101	99.74	0.80099	8.983				50.5946	8.02595
165301	99.88	0.80184	8.982				50.6656	8.03447
165501	99.96	0.80271	8.982				50.7062	8.04319
165701	100.18	0.80364	8.98				50.8178	8.05251
165901	100.28	0.8046	8.986				50.8685	8.06212
166101	100.46	0.80564	8.982				50.9598	8.07255
166301	100.5	0.80662	8.982				50.9801	8.08236
166501	100.58	0.8077	8.983				51.0207	8.09319
166701	100.72	0.80875	8.984				51.0917	8.10371
166901	100.74	0.80974	8.982				51.1018	8.11363
167101	100.66	0.81067	8.982				51.0613	8.12295
167301	100.52	0.81162	8.982				50.9903	8.13246
167501	100.22	0.81282	8.981				50.8381	8.14449
167701	100.1	0.81406	8.984				50.7772	8.15691
167901	99.54	0.81536	8.982				50.4931	8.16994
168101	98.46	0.81684	8.983				49.9453	8.18477
168301	97.76	0.81698	8.982				49.5902	8.18617
168501	97.96	0.81871	8.98				49.6917	8.20351
168701	98.28	0.8191	8.982				49.854	8.20741
168901	98.52	0.82072	8.981				49.9757	8.22365
169101	98.36	0.82147	8.983				49.8946	8.23116
169301	98.42	0.82195	8.98				49.925	8.23597
169501	98.74	0.82344	8.982				50.0873	8.2509
169701	98.84	0.82461	8.981				50.138	8.26263
169901	98.88	0.82539	8.981				50.1583	8.27044
170101	98.9	0.82618	8.982				50.1685	8.27836
170301	99	0.82715	8.983				50.2192	8.28808
170501	99.1	0.82811	8.981				50.2699	8.2977
170701	99.18	0.82899	8.982				50.3105	8.30651
170901	99.28	0.83005	8.982				50.3612	8.31713
171101	99.28	0.83095	8.979				50.3612	8.32615
171301	99.36	0.83202	8.981				50.4018	8.33687
171501	99.42	0.833	8.98				50.4323	8.34669
171701	99.46	0.83399	8.982				50.4526	8.35661
171901	99.48	0.83498	8.982				50.4627	8.36653
172101	99.56	0.83595	8.981				50.5033	8.37625
172301	99.44	0.837	8.982				50.4424	8.38677
172501	99.4	0.83801	8.981				50.4221	8.39689
172701	99.54	0.83906	8.983				50.4931	8.40741
172901	99.36	0.84032	8.982				50.4018	8.42004
173101	99.2	0.84118	8.98				50.3207	8.42866
173301	98.84	0.84251	8.983				50.138	8.44198
173501	98.42	0.84395	8.983				49.925	8.45641
173701	97.8	0.84487	8.979				49.6105	8.46563
173901	97.66	0.84552	8.982				49.5395	8.47214
174101	97.6	0.84644	8.981				49.509	8.48136
174301	97.68	0.84731	8.982				49.5496	8.49008
174501	97.74	0.84839	8.981				49.5801	8.5009
174701	97.86	0.84945	8.98				49.6409	8.51152
174901	98	0.8504	8.983				49.7119	8.52104
175101	98.02	0.85139	8.98				49.7221	8.53096
175301	98.18	0.85224	8.982				49.8033	8.53948
175501	98.2	0.85333	8.983				49.8134	8.5504
175701	98.4	0.85426	8.981				49.9148	8.55972
175901	98.46	0.85524	8.982				49.9453	8.56954
176101	98.5	0.85632	8.982				49.9656	8.58036
176301	98.68	0.85716	8.981				50.0569	8.58878
176501	98.56	0.8582	8.983				49.996	8.5992
176701	98.74	0.85924	8.981				50.0873	8.60962
176901	98.72	0.86025	8.978				50.0772	8.61974
177101	98.7	0.86125	8.983				50.067	8.62976
177301	98.74	0.86224	8.978				50.0873	8.63968
177501	98.82	0.86321	8.983				50.1279	8.6494
177701	98.76	0.86423	8.98				50.0975	8.65962
177901	98.68	0.86526	8.98				50.0569	8.66994
178101	98.68	0.86626	8.979				50.0569	8.67996
178301	98.64	0.86728	8.985				50.0366	8.69018
178501	98.54	0.86841	8.983				49.9859	8.7015
178701	98.52	0.86932	8.978				49.9757	8.71062
178901	98.34	0.87038	8.984				49.8844	8.72124
179101	98.24	0.87142	8.983				49.8337	8.73166
179301	98.24	0.87242	8.986				49.8337	8.74168
179501	98.14	0.87355	8.982				49.783	8.75301
179701	98.18	0.87444	8.982				49.8033	8.76192
179901	98.04	0.87549	8.981				49.7322	8.77244
180101	97.92	0.87653	8.983				49.6714	8.78287
180301	97.96	0.87761	8.979				49.6917	8.79369
180501	97.94	0.87852	8.982				49.6815	8.80281
180701	97.98	0.87951	8.983				49.7018	8.81273
180901	98	0.8805	8.981				49.7119	8.82265
181101	97.88	0.88164	8.979				49.6511	8.83407
181301	97.92	0.88253	8.982				49.6714	8.84299
181501	97.94	0.88352	8.978				49.6815	8.85291
181701	97.92	0.88463	8.982				49.6714	8.86403
181901	97.9	0.88554	8.978				49.6612	8.87315
182101	97.9	0.88664	8.981				49.6612	8.88417
182301	97.82	0.88766	8.982				49.6206	8.89439
182501	97.92	0.88853	8.983				49.6714	8.90311
182701	97.92	0.88953	8.981				49.6714	8.91313
182901	97.92	0.89063	8.982				49.6714	8.92415
183101	97.94	0.89162	8.98				49.6815	8.93407
183301	97.9	0.89263	8.98				49.6612	8.94419
183501	97.9	0.89363	8.98				49.6612	8.95421
183701	97.86	0.89475	8.983				49.6409	8.96543
183901	97.92	0.89563	8.979				49.6714	8.97425
184101	97.82	0.89656	8.98				49.6206	8.98357
184301	97.9	0.89773	8.98				49.6612	8.99529
184501	97.8	0.89877	8.982				49.6105	9.00571
184701	97.8	0.89967	8.983				49.6105	9.01473
184901	97.88	0.90084	8.981				49.6511	9.02645
185101	97.86	0.90185	8.979				49.6409	9.03657
185301	97.66	0.90282	8.98				49.5395	9.04629
185501	97.76	0.90388	8.98				49.5902	9.05691
185701	97.7	0.9049	8.979				49.5598	9.06713
185901	97.6	0.90594	8.98				49.509	9.07756
186101	97.5	0.90688	8.982				49.4583	9.08697
186301	97.54	0.90786	8.982				49.4786	9.09679
186501	97.46	0.90889	8.983				49.438	9.10711
186701	97.52	0.90977	8.983				49.4685	9.11593
186901	97.38	0.91072	8.98				49.3974	9.12545
187101	97.42	0.9116	8.98				49.4177	9.13427
187301	97.32	0.91284	8.98				49.367	9.14669
187501	97.36	0.91372	8.982				49.3873	9.15551
187701	97.32	0.91474	8.981				49.367	9.16573
187901	97.38	0.91572	8.982				49.3974	9.17555
188101	97.26	0.91686	8.984				49.3366	9.18697
188301	97.36	0.91772	8.983				49.3873	9.19559
188501	97.34	0.91873	8.984				49.3771	9.20571
188701	97.38	0.91972	8.981				49.3974	9.21563
188901	97.36	0.92082	8.98				49.3873	9.22665
189101	97.38	0.92182	8.981				49.3974	9.23667
189301	97.4	0.92281	8.983				49.4076	9.24659
189501	97.26	0.92386	8.982				49.3366	9.25711
189701	97.32	0.92484	8.981				49.367	9.26693

## Sheet: F-6
Force (large)	--	journey	) Results Report
17:21:53,06/23/2019
Diameter: 50.0	mm	Height: 99.7	mm
Vertical force transducer (Test piece vertical force)
Control mode: force/confining pressure	Waveform: Slope
KN/s	Force the finish: 24.020	KN	Confining pressure rate :0.500	MPa/s	End point of confining pressure :12.0040	MPa
Time (ms)	Vertical force (KN)	Vertical deformation (mm)	Confining pressure (MPa)				stress	axial strain
0	0	0	0				0	0
200	0	-0.0015	0				0	-0.0150451
400	0	-0.0014	0				0	-0.0140421
601	0.4	-0.00134	0.002				0.203718	-0.0134403
801	0.34	-0.00132	0.006				0.173161	-0.0132397
1003	0.88	-0.00131	0.011				0.44818	-0.0131394
1204	0.66	-0.00103	0.024				0.336135	-0.010331
1404	1.04	-0.00076	0.034				0.529668	-0.00762287
1604	1.16	-0.00011	0.057				0.590783	-0.00110331
1805	1.3	0.00094	0.083				0.662085	0.00942828
2005	1.54	0.00426	0.121				0.784316	0.0427282
2206	1.76	0.00888	0.182				0.896361	0.0890672
2406	1.98	0.01331	0.261				1.00841	0.133501
2606	2.3	0.01749	0.352				1.17138	0.175426
2807	2.48	0.02193	0.428				1.26305	0.21996
3007	2.6	0.02639	0.505				1.32417	0.264694
3208	2.96	0.03106	0.576				1.50752	0.311535
3408	3.1	0.03481	0.647				1.57882	0.349147
3608	3.32	0.03774	0.743				1.69086	0.378536
3809	3.42	0.0404	0.89				1.74179	0.405216
4009	3.72	0.0426	1.195				1.89458	0.427282
4211	3.9	0.04513	1.657				1.98625	0.452658
4412	4.16	0.04844	1.9				2.11867	0.485858
4612	4.34	0.05178	2.021				2.21034	0.519358
4813	4.6	0.05489	2.377				2.34276	0.550552
5013	4.8	0.05822	2.498				2.44462	0.583952
5213	4.94	0.06157	2.565				2.51592	0.617553
5414	5.18	0.06509	2.666				2.63815	0.652859
5614	5.28	0.06835	2.769				2.68908	0.685557
5814	5.58	0.07195	2.866				2.84187	0.721665
6015	5.7	0.0756	2.966				2.90299	0.758275
6215	5.94	0.07942	3.068				3.02522	0.79659
6416	6.18	0.08294	3.168				3.14745	0.831896
6616	6.38	0.08637	3.268				3.24931	0.866299
6816	6.62	0.08958	3.369				3.37154	0.898495
7017	6.78	0.09153	3.467				3.45303	0.918054
7217	6.78	0.09323	3.566				3.45303	0.935105
7419	7.02	0.09494	3.669				3.57526	0.952257
7620	7.18	0.09659	3.772				3.65674	0.968806
7820	7.36	0.09842	3.871				3.74842	0.987161
8021	7.6	0.10034	3.968				3.87065	1.00642
8221	7.8	0.10237	4.068				3.97251	1.02678
8421	8.02	0.10449	4.174				4.08455	1.04804
8622	8.38	0.10647	4.272				4.2679	1.0679
8822	8.5	0.10852	4.373				4.32901	1.08847
9022	8.7	0.11045	4.474				4.43087	1.10782
9223	8.88	0.11239	4.572				4.52255	1.12728
9423	9.1	0.11421	4.673				4.63459	1.14554
9624	9.38	0.11602	4.77				4.77719	1.16369
9824	9.6	0.11784	4.874				4.88924	1.18195
10024	9.78	0.11968	4.969				4.98091	1.2004
10225	9.82	0.12136	5.069				5.00128	1.21725
10425	10.12	0.12316	5.172				5.15407	1.23531
10627	10.28	0.1249	5.274				5.23556	1.25276
10828	10.52	0.12662	5.373				5.35779	1.27001
11028	10.72	0.12845	5.476				5.45965	1.28837
11229	10.96	0.13006	5.575				5.58188	1.30451
11429	11.22	0.13187	5.676				5.7143	1.32267
11629	11.4	0.13341	5.778				5.80597	1.33811
11830	11.62	0.13503	5.875				5.91802	1.35436
12030	11.8	0.13657	5.977				6.00969	1.36981
12230	11.92	0.13803	6.078				6.07081	1.38445
12431	12.14	0.13945	6.178				6.18285	1.3987
12631	12.34	0.14058	6.274				6.28471	1.41003
12832	12.64	0.14208	6.376				6.4375	1.42508
13032	12.74	0.14324	6.475				6.48843	1.43671
13232	12.86	0.1444	6.576				6.54954	1.44835
13433	13.1	0.14581	6.673				6.67178	1.46249
13633	13.3	0.14694	6.777				6.77363	1.47382
13835	13.42	0.1483	6.872				6.83475	1.48746
14036	13.62	0.14943	6.977				6.93661	1.4988
14236	13.9	0.15063	7.077				7.07921	1.51083
14437	14.04	0.15179	7.177				7.15051	1.52247
14637	14.3	0.15289	7.278				7.28293	1.5335
14837	14.42	0.15415	7.378				7.34405	1.54614
15038	14.58	0.1554	7.474				7.42553	1.55868
15238	14.88	0.15659	7.579				7.57832	1.57061
15438	15.08	0.15782	7.68				7.68018	1.58295
15639	15.28	0.15915	7.776				7.78204	1.59629
15839	15.48	0.16038	7.878				7.8839	1.60863
16040	15.76	0.16158	7.974				8.0265	1.62066
16240	15.94	0.16302	8.078				8.11818	1.63511
16440	16.14	0.16425	8.179				8.22003	1.64744
16641	16.36	0.16537	8.277				8.33208	1.65868
16841	16.6	0.16669	8.378				8.45431	1.67192
17043	16.86	0.1678	8.479				8.58673	1.68305
17244	17	0.16895	8.581				8.65803	1.69458
17444	17.2	0.16998	8.68				8.75989	1.70491
17645	17.4	0.17111	8.779				8.86175	1.71625
17845	17.58	0.17205	8.88				8.95342	1.72568
18045	17.74	0.17279	8.981				9.03491	1.7331
18246	17.9	0.17353	9.081				9.1164	1.74052
18446	18.08	0.17417	9.183				9.20807	1.74694
18646	18.18	0.17484	9.279				9.259	1.75366
18847	18.38	0.17557	9.383				9.36086	1.76098
19047	18.62	0.17658	9.481				9.48309	1.77111
19248	18.94	0.17787	9.582				9.64606	1.78405
19448	19.18	0.17919	9.685				9.76829	1.79729
19648	19.42	0.1804	9.782				9.89052	1.80943
19849	19.58	0.18125	9.884				9.97201	1.81795
20049	19.72	0.1821	9.981				10.0433	1.82648
20250	19.8	0.18277	10.081				10.0841	1.8332
20450	20	0.1834	10.182				10.1859	1.83952
20650	20.16	0.18414	10.284				10.2674	1.84694
20851	20.46	0.18484	10.38				10.4202	1.85396
21051	20.6	0.18579	10.483				10.4915	1.86349
21253	20.82	0.18661	10.584				10.6035	1.87172
21454	21	0.18765	10.686				10.6952	1.88215
21654	21.3	0.18884	10.787				10.848	1.89408
21854	21.56	0.19015	10.885				10.9804	1.90722
22055	21.82	0.19146	10.986				11.1128	1.92036
22255	22.02	0.19259	11.089				11.2147	1.9317
22456	22.28	0.1937	11.186				11.3471	1.94283
22656	22.28	0.194	11.286				11.3471	1.94584
22856	22.34	0.19428	11.385				11.3777	1.94865
23057	22.66	0.19517	11.486				11.5406	1.95757
23257	22.82	0.19621	11.589				11.6221	1.968
23458	23.14	0.1973	11.686				11.7851	1.97894
23658	23.36	0.19832	11.786				11.8972	1.98917
23858	23.64	0.19913	11.884				12.0398	1.99729
24059	23.74	0.19989	11.985				12.0907	2.00491
24259	23.82	0.20066	12.007				12.1314	2.01264
24461	24.02	0.20149	12.004				12.2333	2.02096
24462	23.96	0.20151	12.005				12.2027	2.02116
24479	24	0.2015	12.002				12.2231	2.02106
24680	23.98	0.20201	11.977				12.2129	2.02618
24880	24.22	0.20242	11.982				12.3351	2.03029
25080	24.38	0.20337	11.977				12.4166	2.03982
25280	24.7	0.20445	11.978				12.5796	2.05065
25482	24.84	0.20571	11.979				12.6509	2.06329
25682	25	0.20685	11.98				12.7324	2.07472
25882	25.18	0.20769	11.978				12.8241	2.08315
26082	25.36	0.20862	11.981				12.9157	2.09248
26282	25.58	0.20955	11.978				13.0278	2.10181
26482	25.66	0.21042	11.98				13.0685	2.11053
26682	25.82	0.21126	11.982				13.15	2.11896
26882	25.94	0.21222	11.978				13.2111	2.12859
27082	26.14	0.21305	11.98				13.313	2.13691
27282	26.24	0.21392	11.977				13.3639	2.14564
27482	26.44	0.21495	11.98				13.4658	2.15597
27682	26.6	0.21589	11.98				13.5473	2.1654
27882	26.74	0.21674	11.98				13.6186	2.17392
28082	26.86	0.2177	11.978				13.6797	2.18355
28282	27.1	0.21861	11.98				13.8019	2.19268
28482	27.28	0.21955	11.979				13.8936	2.20211
28682	27.4	0.22051	11.979				13.9547	2.21174
28882	27.6	0.22144	11.98				14.0566	2.22106
29082	27.88	0.22224	11.978				14.1992	2.22909
29282	28	0.2233	11.98				14.2603	2.23972
29482	28.12	0.22416	11.979				14.3214	2.24835
29682	28.36	0.22517	11.98				14.4436	2.25848
29882	28.56	0.2261	11.979				14.5455	2.2678
30082	28.74	0.22704	11.983				14.6372	2.27723
30282	28.88	0.22819	11.979				14.7085	2.28877
30482	29.02	0.22904	11.982				14.7798	2.29729
30682	29.28	0.22985	11.98				14.9122	2.30542
30882	29.42	0.2308	11.979				14.9835	2.31494
31082	29.58	0.23175	11.98				15.065	2.32447
31282	29.66	0.23262	11.984				15.1057	2.3332
31482	29.86	0.23365	11.978				15.2076	2.34353
31682	30.04	0.23439	11.98				15.2992	2.35095
31882	30.18	0.23534	11.98				15.3705	2.36048
32082	30.42	0.23635	11.982				15.4928	2.37061
32282	30.52	0.23732	11.98				15.5437	2.38034
32482	30.86	0.2382	11.98				15.7169	2.38917
32682	30.94	0.23917	11.979				15.7576	2.3989
32882	31.1	0.24011	11.978				15.8391	2.40832
33082	31.32	0.24114	11.981				15.9511	2.41866
33282	31.44	0.2421	11.976				16.0123	2.42828
33482	31.58	0.24305	11.98				16.0836	2.43781
33682	31.82	0.24386	11.981				16.2058	2.44594
33882	32.1	0.24486	11.98				16.3484	2.45597
34082	32.2	0.24583	11.98				16.3993	2.4657
34282	32.3	0.24669	11.977				16.4503	2.47432
34482	32.58	0.2475	11.979				16.5929	2.48245
34682	32.72	0.24865	11.981				16.6642	2.49398
34882	32.92	0.24948	11.978				16.766	2.50231
35082	33.22	0.25047	11.978				16.9188	2.51224
35282	33.32	0.25144	11.98				16.9697	2.52197
35482	33.5	0.25247	11.979				17.0614	2.5323
35682	33.72	0.2534	11.978				17.1735	2.54162
35882	33.9	0.25433	11.98				17.2651	2.55095
36082	34	0.2553	11.978				17.3161	2.56068
36282	34.22	0.25612	11.979				17.4281	2.56891
36482	34.36	0.25687	11.978				17.4994	2.57643
36682	34.48	0.25803	11.977				17.5605	2.58806
36882	34.7	0.25885	11.976				17.6726	2.59629
37082	34.96	0.25976	11.981				17.805	2.60542
37282	35.02	0.26084	11.978				17.8355	2.61625
37482	35.26	0.26176	11.981				17.9578	2.62548
37682	35.54	0.26266	11.98				18.1004	2.6345
37882	35.64	0.26363	11.978				18.1513	2.64423
38082	35.8	0.26467	11.976				18.2328	2.65466
38282	36.02	0.26549	11.977				18.3448	2.66289
38482	36.12	0.26656	11.977				18.3958	2.67362
38682	36.34	0.26728	11.98				18.5078	2.68084
38882	36.46	0.26824	11.976				18.5689	2.69047
39082	36.72	0.26915	11.975				18.7013	2.6996
39282	37.04	0.27014	11.978				18.8643	2.70953
39482	37.18	0.27109	11.982				18.9356	2.71906
39682	37.38	0.27192	11.978				19.0375	2.72738
39882	37.56	0.27285	11.979				19.1292	2.73671
40082	37.76	0.27388	11.976				19.231	2.74704
40282	37.98	0.27481	11.978				19.3431	2.75637
40482	38.04	0.27589	11.979				19.3736	2.7672
40682	38.26	0.27681	11.981				19.4857	2.77643
40882	38.48	0.27773	11.978				19.5977	2.78566
41082	38.68	0.27876	11.976				19.6996	2.79599
41282	39	0.27965	11.979				19.8625	2.80491
41482	39.1	0.28071	11.982				19.9135	2.81555
41682	39.24	0.28157	11.982				19.9848	2.82417
41882	39.42	0.2824	11.978				20.0764	2.8325
42082	39.52	0.28327	11.979				20.1274	2.84122
42282	39.68	0.28431	11.979				20.2089	2.85165
42482	39.88	0.28524	11.977				20.3107	2.86098
42682	40.16	0.28594	11.978				20.4533	2.868
42882	40.36	0.28697	11.982				20.5552	2.87834
43082	40.44	0.28785	11.982				20.5959	2.88716
43282	40.66	0.28867	11.977				20.708	2.89539
43482	40.84	0.28971	11.981				20.7996	2.90582
43682	41.02	0.29064	11.979				20.8913	2.91515
43882	41.22	0.29157	11.98				20.9932	2.92447
44082	41.44	0.2924	11.981				21.1052	2.9328
44282	41.52	0.29337	11.982				21.146	2.94253
44482	41.76	0.29428	11.982				21.2682	2.95165
44682	41.98	0.29521	11.981				21.3802	2.96098
44882	42.12	0.29616	11.981				21.4515	2.97051
45082	42.38	0.29687	11.985				21.584	2.97763
45282	42.54	0.29801	11.98				21.6654	2.98907
45482	42.68	0.29896	11.98				21.7367	2.9986
45682	42.86	0.3	11.981				21.8284	3.00903
45882	43.14	0.3009	11.98				21.971	3.01805
46082	43.28	0.30195	11.981				22.0423	3.02859
46282	43.48	0.30298	11.979				22.1442	3.03892
46482	43.54	0.30386	11.978				22.1747	3.04774
46682	43.8	0.30477	11.978				22.3072	3.05687
46882	44.1	0.30566	11.98				22.4599	3.0658
47082	44.12	0.30656	11.982				22.4701	3.07482
47282	44.32	0.30759	11.982				22.572	3.08516
47482	44.56	0.3085	11.984				22.6942	3.09428
47682	44.78	0.30943	11.978				22.8063	3.10361
47882	44.94	0.31037	11.981				22.8878	3.11304
48082	45.2	0.31138	11.979				23.0202	3.12317
48282	45.34	0.31233	11.981				23.0915	3.1327
48482	45.5	0.31317	11.982				23.173	3.14112
48682	45.7	0.3141	11.98				23.2748	3.15045
48882	45.9	0.31493	11.979				23.3767	3.15878
49082	46.06	0.31578	11.976				23.4582	3.1673
49282	46.32	0.31669	11.977				23.5906	3.17643
49482	46.54	0.31751	11.981				23.7026	3.18465
49682	46.66	0.31857	11.981				23.7637	3.19529
49882	46.92	0.31968	11.978				23.8962	3.20642
50082	47.08	0.32062	11.98				23.9776	3.21585
50282	47.24	0.32167	11.977				24.0591	3.22638
50482	47.4	0.32271	11.976				24.1406	3.23681
50682	47.74	0.32359	11.978				24.3138	3.24564
50882	47.78	0.32458	11.978				24.3342	3.25557
51082	48	0.3254	11.979				24.4462	3.26379
51282	48.16	0.32634	11.98				24.5277	3.27322
51482	48.48	0.32723	11.976				24.6907	3.28215
51682	48.6	0.32819	11.978				24.7518	3.29178
51882	48.86	0.329	11.981				24.8842	3.2999
52082	48.92	0.32998	11.979				24.9148	3.30973
52282	49.28	0.33085	11.978				25.0981	3.31846
52482	49.36	0.33192	11.978				25.1388	3.32919
52682	49.62	0.33293	11.977				25.2713	3.33932
52882	49.76	0.33398	11.982				25.3426	3.34985
53082	49.86	0.33485	11.978				25.3935	3.35858
53282	50.12	0.33576	11.975				25.5259	3.3677
53482	50.38	0.33657	11.981				25.6583	3.37583
53682	50.54	0.33761	11.98				25.7398	3.38626
53882	50.72	0.33855	11.98				25.8315	3.39569
54082	50.86	0.3394	11.978				25.9028	3.40421
54282	51.04	0.34024	11.979				25.9945	3.41264
54482	51.24	0.34127	11.98				26.0963	3.42297
54682	51.4	0.34201	11.976				26.1778	3.43039
54882	51.54	0.34296	11.981				26.2491	3.43992
55082	51.72	0.3438	11.981				26.3408	3.44835
55282	51.9	0.34473	11.98				26.4325	3.45767
55482	52.08	0.34557	11.98				26.5241	3.4661
55682	52.36	0.34657	11.98				26.6667	3.47613
55882	52.56	0.3475	11.982				26.7686	3.48546
56082	52.78	0.34863	11.982				26.8806	3.49679
56282	53.02	0.34974	11.976				27.0029	3.50792
56482	53.36	0.35072	11.978				27.176	3.51775
56682	53.48	0.35158	11.981				27.2371	3.52638
56882	53.7	0.3526	11.98				27.3492	3.53661
57082	53.94	0.35352	11.979				27.4714	3.54584
57282	54.04	0.35449	11.978				27.5223	3.55557
57482	54.24	0.35532	11.978				27.6242	3.56389
57682	54.48	0.35603	11.975				27.7464	3.57101
57882	54.5	0.35682	11.979				27.7566	3.57894
58082	54.7	0.35785	11.98				27.8585	3.58927
58282	54.84	0.35881	11.98				27.9298	3.5989
58482	55.14	0.3598	11.979				28.0826	3.60883
58682	55.34	0.36063	11.979				28.1844	3.61715
58882	55.46	0.36169	11.98				28.2455	3.62778
59082	55.6	0.36264	11.98				28.3168	3.63731
59282	55.84	0.36356	11.979				28.4391	3.64654
59482	56.08	0.36447	11.978				28.5613	3.65567
59682	56.36	0.36537	11.981				28.7039	3.66469
59882	56.46	0.36634	11.978				28.7548	3.67442
60082	56.68	0.36746	11.982				28.8669	3.68566
60282	56.94	0.36837	11.982				28.9993	3.69478
60482	57.1	0.36931	11.979				29.0808	3.70421
60682	57.28	0.37025	11.982				29.1725	3.71364
60882	57.44	0.3712	11.984				29.254	3.72317
61082	57.56	0.37205	11.982				29.3151	3.7317
61282	57.84	0.37286	11.976				29.4577	3.73982
61482	57.98	0.37391	11.982				29.529	3.75035
61682	58.16	0.37464	11.978				29.6206	3.75767
61882	58.36	0.37547	11.98				29.7225	3.766
62082	58.52	0.37642	11.98				29.804	3.77553
62282	58.68	0.37736	11.979				29.8855	3.78495
62482	58.92	0.37828	11.983				30.0077	3.79418
62682	59.22	0.37967	11.979				30.1605	3.80812
62882	59.5	0.38087	11.98				30.3031	3.82016
63082	59.72	0.3819	11.981				30.4151	3.83049
63282	59.68	0.38291	11.979				30.3948	3.84062
63482	59.86	0.38335	11.979				30.4864	3.84504
63682	59.94	0.38402	11.979				30.5272	3.85176
63882	60.16	0.38464	11.978				30.6392	3.85797
64082	60.5	0.38592	11.982				30.8124	3.87081
64282	60.78	0.38713	11.976				30.955	3.88295
64482	60.9	0.38828	11.976				31.0161	3.89448
64682	61.04	0.38904	11.979				31.0874	3.90211
64882	61.1	0.38971	11.982				31.118	3.90883
65082	61.4	0.39051	11.98				31.2708	3.91685
65282	61.58	0.39135	11.976				31.3624	3.92528
65482	61.74	0.39229	11.977				31.4439	3.9347
65682	61.98	0.39321	11.979				31.5662	3.94393
65882	62.3	0.39419	11.979				31.7291	3.95376
66082	62.44	0.39505	11.978				31.8004	3.96239
66282	62.6	0.39609	11.98				31.8819	3.97282
66482	62.82	0.39701	11.976				31.994	3.98205
66682	62.98	0.39806	11.982				32.0755	3.99258
66882	63.12	0.39891	11.978				32.1468	4.0011
67082	63.22	0.39977	11.979				32.1977	4.00973
67282	63.4	0.40071	11.978				32.2894	4.01916
67482	63.64	0.40163	11.978				32.4116	4.02839
67682	63.88	0.40244	11.978				32.5338	4.03651
67882	64.02	0.40349	11.98				32.6051	4.04704
68082	64.28	0.4045	11.977				32.7375	4.05717
68282	64.44	0.40555	11.978				32.819	4.0677
68482	64.64	0.40658	11.977				32.9209	4.07803
68682	64.86	0.4075	11.98				33.0329	4.08726
68882	65.06	0.40833	11.976				33.1348	4.09559
69082	65.2	0.40938	11.98				33.2061	4.10612
69282	65.38	0.41022	11.979				33.2978	4.11454
69482	65.56	0.41105	11.977				33.3894	4.12287
69682	65.78	0.41188	11.981				33.5015	4.13119
69882	65.98	0.41281	11.979				33.6033	4.14052
70082	66.12	0.41366	11.975				33.6746	4.14905
70282	66.3	0.41459	11.978				33.7663	4.15838
70482	66.42	0.41555	11.978				33.8274	4.168
70682	66.72	0.41645	11.976				33.9802	4.17703
70882	66.94	0.41747	11.98				34.0923	4.18726
71082	67.02	0.41844	11.981				34.133	4.19699
71282	67.16	0.41929	11.982				34.2043	4.20552
71482	67.38	0.42032	11.978				34.3164	4.21585
71682	67.62	0.42113	11.983				34.4386	4.22397
71882	67.76	0.42198	11.978				34.5099	4.2325
72082	67.94	0.42292	11.979				34.6016	4.24193
72282	68.04	0.42399	11.978				34.6525	4.25266
72482	68.3	0.42479	11.982				34.7849	4.26068
72682	68.44	0.42575	11.984				34.8562	4.27031
72882	68.66	0.42677	11.979				34.9683	4.28054
73082	68.9	0.42768	11.979				35.0905	4.28967
73282	69.18	0.42879	11.98				35.2331	4.3008
73482	69.44	0.4298	11.979				35.3655	4.31093
73682	69.68	0.43091	11.981				35.4877	4.32207
73882	69.78	0.43198	11.982				35.5387	4.3328
74082	70.02	0.43299	11.976				35.6609	4.34293
74282	70.14	0.43395	11.981				35.722	4.35256
74482	70.26	0.43481	11.98				35.7831	4.36118
74682	70.46	0.43574	11.979				35.885	4.37051
74882	70.72	0.43655	11.98				36.0174	4.37864
75082	70.86	0.4374	11.978				36.0887	4.38716
75282	70.96	0.43836	11.982				36.1396	4.39679
75482	71.2	0.43918	11.98				36.2619	4.40502
75682	71.34	0.44013	11.978				36.3332	4.41454
75882	71.52	0.44087	11.98				36.4248	4.42197
76082	71.56	0.44175	11.981				36.4452	4.43079
76282	71.96	0.44271	11.98				36.6489	4.44042
76482	71.98	0.44371	11.984				36.6591	4.45045
76682	72.16	0.44454	11.98				36.7508	4.45878
76882	72.32	0.44549	11.982				36.8323	4.4683
77082	72.58	0.4465	11.981				36.9647	4.47844
77282	72.84	0.44731	11.98				37.0971	4.48656
77482	72.88	0.44829	11.984				37.1175	4.49639
77682	73.18	0.44919	11.977				37.2703	4.50542
77882	73.44	0.4502	11.98				37.4027	4.51555
78082	73.62	0.45113	11.981				37.4944	4.52487
78282	73.82	0.45216	11.98				37.5962	4.53521
78482	74	0.4532	11.982				37.6879	4.54564
78682	74.14	0.45415	11.981				37.7592	4.55517
78882	74.34	0.45508	11.978				37.8611	4.56449
79082	74.44	0.45615	11.977				37.912	4.57523
79282	74.66	0.45697	11.98				38.024	4.58345
79482	74.82	0.45791	11.979				38.1055	4.59288
79682	75	0.45875	11.979				38.1972	4.6013
79882	75.14	0.4596	11.98				38.2685	4.60983
80082	75.3	0.46044	11.98				38.35	4.61825
80282	75.56	0.46145	11.978				38.4824	4.62839
80482	75.78	0.46238	11.981				38.5944	4.63771
80682	75.94	0.46322	11.978				38.6759	4.64614
80882	76.1	0.46426	11.978				38.7574	4.65657
81082	76.4	0.46516	11.975				38.9102	4.6656
81282	76.52	0.46612	11.978				38.9713	4.67523
81482	76.74	0.46714	11.981				39.0834	4.68546
81682	76.82	0.46811	11.981				39.1241	4.69519
81882	77	0.46895	11.978				39.2158	4.70361
82082	77.14	0.4698	11.982				39.2871	4.71214
82282	77.38	0.47082	11.978				39.4093	4.72237
82482	77.58	0.47175	11.978				39.5112	4.7317
82682	77.76	0.47278	11.979				39.6028	4.74203
82882	78	0.4738	11.979				39.7251	4.75226
83082	78.18	0.47474	11.979				39.8167	4.76169
83282	78.38	0.47577	11.98				39.9186	4.77202
83482	78.54	0.47661	11.98				40.0001	4.78044
83682	78.78	0.47753	11.978				40.1223	4.78967
83882	78.94	0.47857	11.981				40.2038	4.8001
84082	79.2	0.47938	11.978				40.3362	4.80822
84282	79.28	0.48045	11.978				40.377	4.81896
84482	79.48	0.48128	11.979				40.4788	4.82728
84682	79.5	0.48217	11.981				40.489	4.83621
84882	79.66	0.48322	11.977				40.5705	4.84674
85082	79.86	0.48405	11.983				40.6724	4.85507
85282	80.08	0.48487	11.978				40.7844	4.86329
85482	80.16	0.48574	11.975				40.8252	4.87202
85682	80.34	0.48668	11.981				40.9168	4.88144
85882	80.6	0.48769	11.98				41.0492	4.89157
86082	80.86	0.4887	11.979				41.1817	4.90171
86282	81.02	0.48974	11.977				41.2631	4.91214
86482	81.24	0.49067	11.98				41.3752	4.92146
86682	81.48	0.49158	11.98				41.4974	4.93059
86882	81.58	0.49265	11.979				41.5484	4.94132
87082	81.78	0.49348	11.978				41.6502	4.94965
87282	81.86	0.49435	11.98				41.691	4.95838
87482	82.08	0.49527	11.976				41.803	4.9676
87682	82.18	0.49624	11.981				41.8539	4.97733
87882	82.48	0.49723	11.98				42.0067	4.98726
88082	82.68	0.49826	11.98				42.1086	4.99759
88282	82.88	0.49909	11.979				42.2104	5.00592
88482	83	0.50015	11.976				42.2716	5.01655
88682	83.08	0.50112	11.981				42.3123	5.02628
88882	83.32	0.50204	11.979				42.4345	5.03551
89082	83.48	0.50288	11.981				42.516	5.04393
89282	83.54	0.50386	11.978				42.5466	5.05376
89482	83.76	0.50478	11.978				42.6586	5.06299
89682	83.94	0.50562	11.981				42.7503	5.07141
89882	84.12	0.50646	11.983				42.842	5.07984
90082	84.32	0.50729	11.979				42.9438	5.08816
90282	84.44	0.50835	11.98				43.0049	5.0988
90482	84.68	0.50916	11.981				43.1272	5.10692
90682	84.84	0.51021	11.981				43.2087	5.11745
90882	85.12	0.51101	11.98				43.3513	5.12548
91082	85.26	0.51206	11.982				43.4226	5.13601
91282	85.6	0.51274	11.978				43.5957	5.14283
91482	85.66	0.51382	11.981				43.6263	5.15366
91682	85.8	0.51477	11.982				43.6976	5.16319
91882	86.1	0.51556	11.982				43.8504	5.17111
92082	86.12	0.51676	11.981				43.8606	5.18315
92282	86.36	0.51777	11.978				43.9828	5.19328
92482	86.56	0.5187	11.982				44.0846	5.20261
92682	86.86	0.5197	11.98				44.2374	5.21264
92882	86.92	0.52068	11.982				44.268	5.22247
93082	87.1	0.52152	11.982				44.3597	5.23089
93282	87.28	0.52245	11.978				44.4513	5.24022
93482	87.32	0.52344	11.98				44.4717	5.25015
93682	87.52	0.52427	11.98				44.5736	5.25848
93882	87.66	0.52512	11.982				44.6449	5.267
94082	87.82	0.52596	11.979				44.7264	5.27543
94282	87.96	0.52691	11.978				44.7977	5.28495
94482	88.18	0.52794	11.979				44.9097	5.29529
94682	88.4	0.52866	11.982				45.0218	5.30251
94882	88.5	0.52962	11.983				45.0727	5.31214
95082	88.7	0.53065	11.978				45.1745	5.32247
95282	89.02	0.53164	11.981				45.3375	5.3324
95482	89.14	0.5326	11.977				45.3986	5.34203
95682	89.4	0.53351	11.978				45.531	5.35115
95882	89.5	0.53457	11.978				45.582	5.36179
96082	89.56	0.53555	11.98				45.6125	5.37161
96282	89.82	0.53636	11.978				45.745	5.37974
96482	89.9	0.53733	11.981				45.7857	5.38947
96682	90.02	0.53829	11.976				45.8468	5.3991
96882	90.22	0.53922	11.978				45.9487	5.40843
97082	90.38	0.54007	11.976				46.0302	5.41695
97282	90.58	0.541	11.979				46.132	5.42628
97482	90.84	0.54211	11.979				46.2644	5.43741
97682	91.06	0.54323	11.98				46.3765	5.44865
97882	91.24	0.54427	11.98				46.4682	5.45908
98082	91.36	0.54522	11.978				46.5293	5.46861
98282	91.64	0.54613	11.98				46.6719	5.47773
98482	91.78	0.54708	11.979				46.7432	5.48726
98682	91.8	0.54807	11.978				46.7534	5.49719
98882	91.92	0.54893	11.975				46.8145	5.50582
99082	92.16	0.54994	11.98				46.9367	5.51595
99282	92.44	0.55075	11.98				47.0793	5.52407
99482	92.52	0.55172	11.979				47.12	5.5338
99682	92.58	0.5525	11.977				47.1506	5.54162
99882	92.84	0.55351	11.981				47.283	5.55176
100082	92.94	0.55437	11.979				47.334	5.56038
100282	93.1	0.55521	11.975				47.4154	5.56881
100482	93.24	0.55607	11.978				47.4867	5.57743
100682	93.4	0.55711	11.976				47.5682	5.58786
100882	93.58	0.55805	11.978				47.6599	5.59729
101082	93.82	0.55896	11.978				47.7821	5.60642
101282	93.96	0.55981	11.98				47.8534	5.61494
101482	94.1	0.56086	11.978				47.9247	5.62548
101682	94.26	0.56171	11.977				48.0062	5.634
101882	94.48	0.56263	11.975				48.1183	5.64323
102082	94.68	0.56366	11.98				48.2201	5.65356
102282	94.8	0.56462	11.978				48.2812	5.66319
102482	95	0.56555	11.979				48.3831	5.67252
102682	95.04	0.56644	11.98				48.4035	5.68144
102882	95.2	0.56728	11.979				48.485	5.68987
103082	95.32	0.56824	11.976				48.5461	5.6995
103282	95.56	0.56915	11.98				48.6683	5.70863
103482	95.78	0.57008	11.98				48.7804	5.71795
103682	95.9	0.57104	11.979				48.8415	5.72758
103882	96.16	0.57194	11.98				48.9739	5.73661
104082	96.22	0.57302	11.976				49.0044	5.74744
104282	96.52	0.57402	11.981				49.1572	5.75747
104482	96.68	0.57506	11.978				49.2387	5.7679
104682	96.8	0.57602	11.978				49.2998	5.77753
104882	96.94	0.57697	11.978				49.3711	5.78706
105082	97.08	0.57782	11.978				49.4424	5.79559
105282	97.24	0.57877	11.982				49.5239	5.80512
105482	97.44	0.5797	11.982				49.6258	5.81444
105682	97.58	0.58055	11.977				49.6971	5.82297
105882	97.62	0.58153	11.98				49.7175	5.8328
106082	97.84	0.58246	11.982				49.8295	5.84213
106282	98.02	0.58329	11.978				49.9212	5.85045
106482	98.26	0.58431	11.978				50.0434	5.86068
106682	98.4	0.58526	11.982				50.1147	5.87021
106882	98.46	0.58624	11.978				50.1453	5.88004
107082	98.7	0.58745	11.978				50.2675	5.89218
107282	98.96	0.58856	11.98				50.3999	5.90331
107482	99.14	0.5896	11.982				50.4916	5.91374
107682	99.26	0.59066	11.981				50.5527	5.92437
107882	99.54	0.59166	11.98				50.6953	5.9344
108082	99.64	0.59253	11.98				50.7462	5.94313
108282	99.84	0.59336	11.98				50.8481	5.95145
108482	99.86	0.59435	11.982				50.8583	5.96138
108682	100.06	0.59508	11.979				50.9601	5.96871
108882	100.12	0.59606	11.978				50.9907	5.97854
109082	100.26	0.59701	11.979				51.062	5.98806
109282	100.4	0.59786	11.982				51.1333	5.99659
109482	100.64	0.59868	11.979				51.2555	6.00481
109682	100.78	0.59973	11.979				51.3268	6.01535
109882	100.86	0.6006	11.981				51.3676	6.02407
110082	101	0.60155	11.982				51.4389	6.0336
110282	101.16	0.60239	11.98				51.5204	6.04203
110482	101.3	0.60334	11.979				51.5917	6.05155
110682	101.42	0.6042	11.98				51.6528	6.06018
110882	101.56	0.60515	11.981				51.7241	6.06971
111082	101.82	0.60606	11.98				51.8565	6.07884
111282	101.94	0.60712	11.982				51.9176	6.08947
111482	101.98	0.60811	11.979				51.938	6.0994
111682	102.18	0.60904	11.977				52.0398	6.10873
111882	102.22	0.60982	11.98				52.0602	6.11655
112082	102.46	0.61074	11.976				52.1824	6.12578
112282	102.68	0.61176	11.983				52.2945	6.13601
112482	102.78	0.61263	11.979				52.3454	6.14473
112682	103	0.61345	11.979				52.4575	6.15296
112882	103.24	0.61457	11.978				52.5797	6.16419
113082	103.54	0.61586	11.978				52.7325	6.17713
113282	103.64	0.61693	11.978				52.7834	6.18786
113482	103.8	0.61807	11.983				52.8649	6.1993
113682	103.86	0.61895	11.976				52.8955	6.20812
113882	104.08	0.61987	11.978				53.0075	6.21735
114082	104.16	0.62074	11.977				53.0483	6.22608
114282	104.28	0.6215	11.981				53.1094	6.2337
114482	104.38	0.62237	11.979				53.1603	6.24243
114682	104.52	0.62322	11.976				53.2316	6.25095
114882	104.62	0.62418	11.979				53.2825	6.26058
115082	104.78	0.62513	11.978				53.364	6.27011
115282	105.02	0.62604	11.98				53.4862	6.27924
115482	105.08	0.62702	11.978				53.5168	6.28907
115682	105.22	0.62787	11.979				53.5881	6.29759
115882	105.4	0.62891	11.979				53.6798	6.30802
116082	105.48	0.62968	11.976				53.7205	6.31575
116282	105.74	0.63069	11.982				53.8529	6.32588
116482	105.84	0.63166	11.978				53.9039	6.33561
116682	106.06	0.63268	11.981				54.0159	6.34584
116882	106.1	0.63366	11.978				54.0363	6.35567
117082	106.3	0.63459	11.978				54.1381	6.36499
117282	106.48	0.63543	11.976				54.2298	6.37342
117482	106.6	0.63649	11.979				54.2909	6.38405
117682	106.72	0.63725	11.982				54.352	6.39168
117882	106.88	0.63819	11.98				54.4335	6.4011
118082	107.04	0.63914	11.98				54.515	6.41063
118282	107.12	0.64011	11.977				54.5558	6.42036
118482	107.24	0.64097	11.98				54.6169	6.42899
118682	107.54	0.64176	11.978				54.7697	6.43691
118882	107.58	0.64275	11.978				54.79	6.44684
119082	107.7	0.6438	11.976				54.8512	6.45737
119282	107.88	0.64464	11.979				54.9428	6.4658
119482	107.98	0.64571	11.976				54.9938	6.47653
119682	108.1	0.64666	11.978				55.0549	6.48606
119882	108.3	0.6477	11.979				55.1567	6.49649
120082	108.44	0.64855	11.98				55.228	6.50502
120282	108.66	0.64947	11.98				55.3401	6.51424
120482	108.7	0.65045	11.978				55.3605	6.52407
120682	108.86	0.6514	11.982				55.4419	6.5336
120882	108.96	0.65226	11.978				55.4929	6.54223
121082	109.08	0.65322	11.982				55.554	6.55186
121282	109.28	0.65415	11.978				55.6558	6.56118
121482	109.26	0.65516	11.98				55.6457	6.57131
121682	109.52	0.65627	11.98				55.7781	6.58245
121882	109.62	0.65733	11.98				55.829	6.59308
122082	109.82	0.65816	11.98				55.9309	6.6014
122282	110.04	0.65929	11.978				56.0429	6.61274
122482	110.26	0.66021	11.978				56.155	6.62197
122682	110.36	0.66117	11.979				56.2059	6.63159
122882	110.42	0.66215	11.976				56.2364	6.64142
123082	110.56	0.663	11.982				56.3077	6.64995
123282	110.7	0.66395	11.982				56.379	6.65948
123482	110.76	0.66493	11.982				56.4096	6.66931
123682	110.86	0.6659	11.977				56.4605	6.67904
123882	110.96	0.66666	11.977				56.5115	6.68666
124082	111.18	0.66759	11.982				56.6235	6.69599
124282	111.22	0.66857	11.978				56.6439	6.70582
124482	111.4	0.66951	11.977				56.7356	6.71525
124682	111.54	0.67046	11.977				56.8069	6.72477
124882	111.7	0.6715	11.982				56.8883	6.73521
125082	111.76	0.67238	11.978				56.9189	6.74403
125282	111.86	0.67345	11.98				56.9698	6.75476
125482	112.02	0.67429	11.98				57.0513	6.76319
125682	112.16	0.67524	11.979				57.1226	6.77272
125882	112.3	0.67629	11.977				57.1939	6.78325
126082	112.36	0.67717	11.98				57.2245	6.79208
126282	112.58	0.6781	11.979				57.3365	6.8014
126482	112.68	0.67906	11.982				57.3875	6.81103
126682	112.84	0.68001	11.979				57.4689	6.82056
126882	112.96	0.68106	11.98				57.5301	6.83109
127082	113.12	0.68211	11.98				57.6115	6.84162
127282	113.24	0.68307	11.976				57.6727	6.85125
127482	113.38	0.68402	11.982				57.744	6.86078
127682	113.5	0.68507	11.981				57.8051	6.87131
127882	113.72	0.686	11.981				57.9171	6.88064
128082	113.84	0.68696	11.979				57.9782	6.89027
128282	113.98	0.68781	11.978				58.0495	6.8988
128482	114.04	0.68889	11.978				58.0801	6.90963
128682	114.2	0.68973	11.979				58.1616	6.91805
128882	114.28	0.6907	11.979				58.2023	6.92778
129082	114.48	0.69173	11.976				58.3042	6.93811
129282	114.5	0.69273	11.98				58.3144	6.94814
129482	114.7	0.69366	11.98				58.4162	6.95747
129682	114.8	0.69462	11.978				58.4672	6.9671
129882	114.86	0.6955	11.981				58.4977	6.97593
130082	114.92	0.69668	11.978				58.5283	6.98776
130282	115.16	0.69749	11.976				58.6505	6.99589
130482	115.24	0.69847	11.98				58.6913	7.00572
130682	115.38	0.69942	11.976				58.7626	7.01525
130882	115.5	0.70037	11.979				58.8237	7.02477
131082	115.68	0.70121	11.976				58.9153	7.0332
131282	115.7	0.70221	11.978				58.9255	7.04323
131482	115.76	0.70298	11.978				58.9561	7.05095
131682	115.9	0.70383	11.975				59.0274	7.05948
131882	116.04	0.70479	11.978				59.0987	7.06911
132082	116.22	0.70572	11.978				59.1904	7.07844
132282	116.22	0.70672	11.975				59.1904	7.08847
132482	116.4	0.70766	11.975				59.282	7.09789
132682	116.56	0.7087	11.978				59.3635	7.10832
132882	116.76	0.70983	11.979				59.4654	7.11966
133082	117.02	0.71094	11.978				59.5978	7.13079
133282	117.08	0.71212	11.98				59.6284	7.14263
133482	117.26	0.71316	11.979				59.72	7.15306
133682	117.28	0.71415	11.978				59.7302	7.16299
133882	117.4	0.71511	11.977				59.7913	7.17262
134082	117.56	0.71585	11.979				59.8728	7.18004
134282	117.58	0.71685	11.98				59.883	7.19007
134482	117.72	0.7177	11.979				59.9543	7.1986
134682	117.84	0.71866	11.981				60.0154	7.20822
134882	117.88	0.71954	11.977				60.0358	7.21705
135082	118.02	0.72059	11.978				60.1071	7.22758
135282	118.16	0.72154	11.977				60.1784	7.23711
135482	118.16	0.72244	11.979				60.1784	7.24614
135682	118.38	0.72327	11.978				60.2904	7.25446
135882	118.44	0.72415	11.979				60.321	7.26329
136082	118.6	0.72519	11.979				60.4025	7.27372
136282	118.64	0.72608	11.978				60.4229	7.28265
136482	118.74	0.72694	11.978				60.4738	7.29127
136682	118.92	0.72778	11.977				60.5655	7.2997
136882	119	0.72875	11.98				60.6062	7.30943
137082	119.06	0.72983	11.978				60.6368	7.32026
137282	119.24	0.73077	11.976				60.7284	7.32969
137482	119.26	0.73186	11.981				60.7386	7.34062
137682	119.4	0.73271	11.981				60.8099	7.34915
137882	119.44	0.7337	11.978				60.8303	7.35908
138082	119.48	0.73458	11.978				60.8507	7.3679
138282	119.56	0.73565	11.979				60.8914	7.37864
138482	119.76	0.73668	11.978				60.9933	7.38897
138682	119.7	0.73761	11.976				60.9627	7.39829
138882	119.86	0.73855	11.98				61.0442	7.40772
139082	120.06	0.73948	11.982				61.1461	7.41705
139282	120.24	0.74042	11.977				61.2377	7.42648
139482	120.24	0.74142	11.976				61.2377	7.43651
139682	120.32	0.74239	11.977				61.2785	7.44624
139882	120.58	0.7433	11.981				61.4109	7.45537
140082	120.54	0.74421	11.979				61.3905	7.46449
140282	120.7	0.74516	11.978				61.472	7.47402
140482	120.82	0.74621	11.978				61.5331	7.48455
140682	120.9	0.74728	11.975				61.5739	7.49529
140882	121	0.74825	11.976				61.6248	7.50502
141082	121.1	0.74922	11.979				61.6757	7.51474
141282	121.22	0.75017	11.978				61.7368	7.52427
141482	121.34	0.75113	11.98				61.798	7.5339
141682	121.44	0.7521	11.98				61.8489	7.54363
141882	121.6	0.75304	11.981				61.9304	7.55306
142082	121.66	0.75402	11.98				61.9609	7.56289
142282	121.74	0.75499	11.978				62.0017	7.57262
142482	121.74	0.75589	11.979				62.0017	7.58164
142682	121.96	0.75691	11.98				62.1137	7.59188
142882	122.06	0.75778	11.98				62.1646	7.6006
143082	122.04	0.75869	11.979				62.1545	7.60973
143282	122.3	0.75969	11.98				62.2869	7.61976
143482	122.38	0.76087	11.978				62.3276	7.63159
143682	122.48	0.76193	11.979				62.3786	7.64223
143882	122.58	0.7629	11.98				62.4295	7.65196
144082	122.76	0.76383	11.98				62.5212	7.66128
144282	122.76	0.76483	11.976				62.5212	7.67131
144482	122.86	0.7658	11.981				62.5721	7.68104
144682	122.96	0.76666	11.98				62.623	7.68967
144882	123.12	0.76771	11.978				62.7045	7.7002
145082	123.2	0.76868	11.98				62.7452	7.70993
145282	123.24	0.76957	11.978				62.7656	7.71886
145482	123.26	0.77056	11.978				62.7758	7.72879
145682	123.34	0.77143	11.979				62.8165	7.73751
145882	123.38	0.77242	11.98				62.8369	7.74744
146082	123.48	0.77338	11.981				62.8878	7.75707
146282	123.56	0.77425	11.978				62.9286	7.7658
146482	123.64	0.77523	11.978				62.9693	7.77563
146682	123.72	0.7761	11.98				63.0101	7.78435
146882	123.84	0.77706	11.978				63.0712	7.79398
147082	123.76	0.77818	11.98				63.0305	7.80522
147282	123.98	0.77901	11.977				63.1425	7.81354
147482	124.14	0.77995	11.98				63.224	7.82297
147682	124.18	0.78094	11.978				63.2444	7.8329
147882	124.36	0.78207	11.977				63.336	7.84423
148082	124.44	0.78295	11.979				63.3768	7.85306
148282	124.54	0.78401	11.976				63.4277	7.86369
148482	124.62	0.78498	11.98				63.4684	7.87342
148682	124.76	0.78593	11.981				63.5397	7.88295
148882	124.8	0.78692	11.978				63.5601	7.89288
149082	124.9	0.78778	11.982				63.611	7.9015
149282	124.88	0.78879	11.979				63.6009	7.91163
149482	124.96	0.78976	11.978				63.6416	7.92136
149682	125	0.79075	11.979				63.662	7.93129
149882	125.04	0.79174	11.981				63.6823	7.94122
150082	125.18	0.79259	11.981				63.7537	7.94975
150282	125.32	0.79364	11.979				63.825	7.96028
150482	125.32	0.79464	11.976				63.825	7.97031
150682	125.44	0.7957	11.979				63.8861	7.98094
150882	125.6	0.79664	11.98				63.9676	7.99037
151082	125.54	0.79746	11.978				63.937	7.9986
151282	125.7	0.7986	11.977				64.0185	8.01003
151482	125.9	0.79943	11.979				64.1203	8.01836
151682	125.92	0.80043	11.982				64.1305	8.02839
151882	125.88	0.80144	11.979				64.1102	8.03852
152082	125.94	0.80242	11.981				64.1407	8.04835
152282	126.16	0.80344	11.982				64.2528	8.05858
152482	126.22	0.80452	11.978				64.2833	8.06941
152682	126.4	0.80556	11.979				64.375	8.07984
152882	126.4	0.80676	11.979				64.375	8.09188
153082	126.46	0.80774	11.978				64.4055	8.10171
153282	126.64	0.80868	11.979				64.4972	8.11113
153482	126.56	0.8097	11.979				64.4565	8.12136
153682	126.68	0.81066	11.983				64.5176	8.13099
153882	126.72	0.81155	11.979				64.538	8.13992
154082	126.8	0.81242	11.98				64.5787	8.14865
154282	126.86	0.8134	11.981				64.6093	8.15848
154482	126.86	0.8144	11.978				64.6093	8.16851
154682	126.98	0.81526	11.98				64.6704	8.17713
154882	127.12	0.81621	11.98				64.7417	8.18666
155082	127.16	0.81709	11.981				64.7621	8.19549
155282	127.18	0.81809	11.98				64.7722	8.20552
155482	127.22	0.81917	11.982				64.7926	8.21635
155682	127.32	0.82014	11.979				64.8435	8.22608
155882	127.38	0.82102	11.978				64.8741	8.2349
156082	127.52	0.82197	11.981				64.9454	8.24443
156282	127.54	0.82286	11.982				64.9556	8.25336
156482	127.6	0.82384	11.982				64.9861	8.26319
156682	127.66	0.82482	11.98				65.0167	8.27302
156882	127.62	0.82593	11.979				64.9963	8.28415
157082	127.74	0.82669	11.984				65.0574	8.29178
157282	127.74	0.82769	11.982				65.0574	8.30181
157482	127.84	0.82866	11.98				65.1084	8.31153
157682	127.92	0.82973	11.982				65.1491	8.32227
157882	127.94	0.83072	11.982				65.1593	8.3322
158082	128	0.8317	11.978				65.1899	8.34203
158282	128.04	0.83269	11.979				65.2102	8.35196
158482	128.1	0.83367	11.979				65.2408	8.36179
158682	128.24	0.83462	11.979				65.3121	8.37131
158882	128.24	0.83562	11.979				65.3121	8.38134
159082	128.26	0.83661	11.976				65.3223	8.39127
159282	128.36	0.83757	11.981				65.3732	8.4009
159482	128.58	0.8385	11.981				65.4853	8.41023
159682	128.54	0.83941	11.981				65.4649	8.41936
159882	128.6	0.84039	11.978				65.4954	8.42919
160082	128.6	0.84139	11.982				65.4954	8.43922
160282	128.76	0.84223	11.98				65.5769	8.44764
160482	128.92	0.84338	11.978				65.6584	8.45918
160682	128.82	0.84441	11.978				65.6075	8.46951
160882	129	0.84545	11.981				65.6992	8.47994
161082	129	0.84655	11.981				65.6992	8.49097
161282	129.06	0.84743	11.98				65.7297	8.4998
161482	129.16	0.84849	11.98				65.7806	8.51043
161682	129.32	0.84944	11.978				65.8621	8.51996
161882	129.28	0.85045	11.979				65.8418	8.53009
162082	129.36	0.85142	11.979				65.8825	8.53982
162282	129.4	0.85231	11.981				65.9029	8.54875
162482	129.38	0.85332	11.98				65.8927	8.55888
162682	129.48	0.85428	11.977				65.9436	8.56851
162882	129.52	0.85527	11.98				65.964	8.57844
163082	129.66	0.85622	11.977				66.0353	8.58796
163282	129.64	0.85723	11.977				66.0251	8.59809
163482	129.76	0.85818	11.977				66.0862	8.60762
163682	129.78	0.85918	11.979				66.0964	8.61765
163882	129.8	0.86007	11.982				66.1066	8.62658
164082	129.8	0.86107	11.978				66.1066	8.63661
164282	130	0.862	11.982				66.2085	8.64594
164482	130	0.8629	11.978				66.2085	8.65496
164682	130.14	0.86385	11.978				66.2798	8.66449
164882	130.1	0.86476	11.978				66.2594	8.67362
165082	130.2	0.86583	11.979				66.3103	8.68435
165282	130.4	0.86666	11.98				66.4122	8.69268
165482	130.44	0.86785	11.976				66.4325	8.70461
165682	130.56	0.8689	11.98				66.4937	8.71515
165882	130.64	0.86988	11.978				66.5344	8.72497
166082	130.74	0.87084	11.975				66.5853	8.7346
166282	130.8	0.87202	11.98				66.6159	8.74644
166482	130.92	0.87288	11.983				66.677	8.75507
166682	130.84	0.87401	11.978				66.6363	8.7664
166882	130.84	0.87491	11.979				66.6363	8.77543
167082	131.06	0.87593	11.978				66.7483	8.78566
167282	131.08	0.87702	11.979				66.7585	8.79659
167482	131.1	0.87801	11.979				66.7687	8.80652
167682	131.12	0.87891	11.98				66.7789	8.81555
167882	131.16	0.87999	11.98				66.7992	8.82638
168082	131.16	0.88089	11.979				66.7992	8.83541
168282	131.3	0.88184	11.978				66.8705	8.84493
168482	131.36	0.88282	11.978				66.9011	8.85476
168682	131.32	0.88384	11.978				66.8807	8.86499
168882	131.34	0.88483	11.975				66.8909	8.87492
169082	131.44	0.8858	11.982				66.9418	8.88465
169282	131.48	0.88668	11.977				66.9622	8.89348
169482	131.44	0.8878	11.979				66.9418	8.90471
169682	131.48	0.88868	11.98				66.9622	8.91354
169882	131.48	0.88958	11.977				66.9622	8.92257
170082	131.58	0.89055	11.98				67.0131	8.9323
170282	131.64	0.89153	11.977				67.0437	8.94213
170482	131.68	0.89261	11.978				67.0641	8.95296
170682	131.78	0.89358	11.978				67.115	8.96269
170882	131.86	0.89435	11.977				67.1557	8.97041
171082	131.9	0.89534	11.977				67.1761	8.98034
171282	131.84	0.89656	11.977				67.1456	8.99258
171482	131.9	0.89753	11.978				67.1761	9.00231
171682	132	0.8984	11.978				67.227	9.01103
171882	131.92	0.89953	11.979				67.1863	9.02237
172082	132.06	0.90038	11.979				67.2576	9.03089
172282	132.08	0.90137	11.978				67.2678	9.04082
172482	132.18	0.90224	11.977				67.3187	9.04955
172682	132.18	0.90314	11.98				67.3187	9.05858
172882	132.12	0.90416	11.978				67.2882	9.06881
173082	132.18	0.90524	11.979				67.3187	9.07964
173282	132.2	0.90613	11.978				67.3289	9.08857
173482	132.32	0.90709	11.982				67.39	9.09819
173682	132.34	0.90808	11.978				67.4002	9.10812
173882	132.44	0.90905	11.976				67.4511	9.11785
174082	132.5	0.91003	11.98				67.4817	9.12768
174282	132.48	0.91103	11.981				67.4715	9.13771
174482	132.5	0.91212	11.978				67.4817	9.14865
174682	132.5	0.91303	11.978				67.4817	9.15777
174882	132.54	0.91401	11.978				67.5021	9.1676
175082	132.52	0.91502	11.975				67.4919	9.17773
175282	132.56	0.9161	11.976				67.5123	9.18857
175482	132.6	0.91709	11.977				67.5326	9.1985
175682	132.64	0.91788	11.978				67.553	9.20642
175882	132.68	0.91896	11.979				67.5734	9.21725
176082	132.76	0.91993	11.977				67.6141	9.22698
176282	132.74	0.92094	11.978				67.6039	9.23711
176482	132.84	0.92191	11.979				67.6549	9.24684
176682	132.88	0.92289	11.981				67.6752	9.25667
176882	132.88	0.92389	11.983				67.6752	9.2667
177082	132.98	0.92486	11.983				67.7262	9.27643
177282	132.96	0.92596	11.979				67.716	9.28746
177482	132.92	0.92688	11.979				67.6956	9.29669
177682	133.02	0.92784	11.98				67.7465	9.30632
177882	133.02	0.92894	11.979				67.7465	9.31735
178082	133.18	0.92989	11.978				67.828	9.32688
178282	133.12	0.93081	11.981				67.7975	9.33611
178482	133.24	0.93177	11.98				67.8586	9.34574
178682	133.26	0.93276	11.978				67.8688	9.35567
178882	133.22	0.93397	11.976				67.8484	9.3678
179082	133.2	0.93498	11.98				67.8382	9.37793
179282	133.24	0.93597	11.976				67.8586	9.38786
179482	133.16	0.93699	11.98				67.8178	9.39809
179682	133.12	0.93791	11.977				67.7975	9.40732
179882	133.26	0.93886	11.978				67.8688	9.41685
180082	133.3	0.93975	11.982				67.8891	9.42578
180282	133.36	0.94072	11.98				67.9197	9.43551
180482	133.4	0.94181	11.979				67.9401	9.44644
180682	133.42	0.9427	11.978				67.9502	9.45537
180882	133.44	0.9438	11.982				67.9604	9.4664
181082	133.4	0.94481	11.979				67.9401	9.47653
181282	133.54	0.94566	11.98				68.0114	9.48506
181482	133.56	0.94675	11.981				68.0215	9.49599
181682	133.64	0.94763	11.978				68.0623	9.50481
181882	133.52	0.94857	11.978				68.0012	9.51424
182082	133.56	0.94965	11.978				68.0215	9.52508
182282	133.62	0.95053	11.978				68.0521	9.5339
182482	133.56	0.95165	11.983				68.0215	9.54514
182682	133.58	0.95265	11.976				68.0317	9.55517
182882	133.74	0.95349	11.977				68.1132	9.56359
183082	133.74	0.95449	11.976				68.1132	9.57362
183282	133.74	0.95549	11.98				68.1132	9.58365
183482	133.66	0.95652	11.979				68.0725	9.59398
183682	133.72	0.9574	11.98				68.103	9.60281
183882	133.68	0.95851	11.976				68.0827	9.61394
184082	133.6	0.95964	11.976				68.0419	9.62528
184282	133.58	0.96055	11.98				68.0317	9.6344
184482	133.66	0.96172	11.976				68.0725	9.64614
184682	133.62	0.96263	11.976				68.0521	9.65527
184882	133.74	0.96369	11.978				68.1132	9.6659
185082	133.72	0.9647	11.976				68.103	9.67603
185282	133.72	0.9657	11.976				68.103	9.68606
185482	133.72	0.9668	11.98				68.103	9.69709
185682	133.72	0.9677	11.98				68.103	9.70612
185882	133.72	0.9688	11.977				68.103	9.71715
186082	133.8	0.96967	11.975				68.1438	9.72588
186282	133.74	0.97079	11.978				68.1132	9.73711
186482	133.72	0.9717	11.979				68.103	9.74624
186682	133.68	0.97281	11.981				68.0827	9.75737
186882	133.68	0.97381	11.978				68.0827	9.7674
187082	133.74	0.97479	11.976				68.1132	9.77723
187282	133.74	0.97579	11.98				68.1132	9.78726
187482	133.82	0.97676	11.976				68.154	9.79699
187682	133.86	0.97775	11.979				68.1743	9.80692
187882	133.88	0.97874	11.978				68.1845	9.81685
188082	133.92	0.97973	11.981				68.2049	9.82678
188282	133.9	0.98073	11.978				68.1947	9.83681
188482	133.86	0.98175	11.978				68.1743	9.84704
188682	133.94	0.98272	11.981				68.2151	9.85677
188882	133.98	0.98371	11.979				68.2355	9.8667
189082	134	0.9846	11.976				68.2456	9.87563
189282	133.9	0.98564	11.98				68.1947	9.88606
189482	133.82	0.98666	11.978				68.154	9.89629
189682	133.82	0.98756	11.976				68.154	9.90532
189882	133.86	0.98865	11.976				68.1743	9.91625
190082	133.9	0.98963	11.981				68.1947	9.92608
190282	133.98	0.99061	11.979				68.2355	9.93591
190482	133.98	0.99161	11.98				68.2355	9.94594
190682	133.88	0.99264	11.979				68.1845	9.95627
190882	133.9	0.99363	11.981				68.1947	9.9662
191082	133.98	0.99461	11.978				68.2355	9.97603
191282	134	0.9956	11.98				68.2456	9.98596
191482	133.98	0.99671	11.98				68.2355	9.99709
191682	134.1	0.99766	11.981				68.2966	10.0066
191882	134.06	0.99868	11.978				68.2762	10.0169
192082	134.08	0.99967	11.98				68.2864	10.0268
192282	134.08	1.00057	11.978				68.2864	10.0358
192482	134.06	1.00168	11.98				68.2762	10.0469
192682	133.96	1.00271	11.98				68.2253	10.0573
192882	134	1.0037	11.982				68.2456	10.0672
193082	133.94	1.00472	11.977				68.2151	10.0774
193282	133.96	1.00561	11.978				68.2253	10.0864
193482	134.04	1.00659	11.979				68.266	10.0962
193682	134.04	1.00769	11.978				68.266	10.1072
193882	134.02	1.00869	11.978				68.2558	10.1173
194082	134.1	1.00956	11.981				68.2966	10.126
194282	133.98	1.01071	11.98				68.2355	10.1375
194482	134.1	1.01166	11.98				68.2966	10.147
194682	134.06	1.01268	11.978				68.2762	10.1573
194882	134.02	1.01369	11.98				68.2558	10.1674
195082	133.9	1.01463	11.979				68.1947	10.1768
195282	134	1.0156	11.982				68.2456	10.1866
195482	133.96	1.01671	11.978				68.2253	10.1977
195682	133.92	1.01763	11.978				68.2049	10.2069
195882	133.86	1.01875	11.979				68.1743	10.2182
196082	133.84	1.01976	11.978				68.1642	10.2283
196282	133.9	1.02074	11.978				68.1947	10.2381
196482	133.92	1.02163	11.979				68.2049	10.247
196682	133.88	1.02264	11.98				68.1845	10.2572
196882	133.9	1.02364	11.978				68.1947	10.2672
197082	133.92	1.02473	11.982				68.2049	10.2781
197282	133.92	1.02563	11.98				68.2049	10.2872
197482	133.84	1.02676	11.98				68.1642	10.2985
197682	133.8	1.02777	11.98				68.1438	10.3086
197882	133.82	1.02856	11.98				68.154	10.3165
198082	133.88	1.02964	11.978				68.1845	10.3274
198282	133.86	1.03085	11.98				68.1743	10.3395
198482	133.96	1.03171	11.979				68.2253	10.3481
198682	133.96	1.03271	11.978				68.2253	10.3582
198882	133.94	1.03372	11.979				68.2151	10.3683
199082	133.82	1.03476	11.978				68.154	10.3787
199282	133.88	1.03574	11.978				68.1845	10.3886
199482	133.88	1.03674	11.979				68.1845	10.3986
199682	133.94	1.03782	11.978				68.2151	10.4094
199882	133.8	1.03877	11.98				68.1438	10.419
200082	133.88	1.03974	11.977				68.1845	10.4287
200282	133.82	1.04076	11.982				68.154	10.4389
200482	133.84	1.04186	11.978				68.1642	10.4499
200682	133.84	1.04276	11.979				68.1642	10.459
200882	133.84	1.04376	11.981				68.1642	10.469
201082	133.82	1.04486	11.979				68.154	10.48
201282	133.74	1.04589	11.974				68.1132	10.4904
201482	133.78	1.04678	11.982				68.1336	10.4993
201682	133.82	1.04776	11.977				68.154	10.5091
201882	133.82	1.04886	11.978				68.154	10.5202
202082	133.76	1.04978	11.975				68.1234	10.5294
202282	133.7	1.0509	11.978				68.0929	10.5406
202482	133.74	1.05189	11.979				68.1132	10.5506
202682	133.82	1.05286	11.978				68.154	10.5603
202882	133.74	1.05389	11.978				68.1132	10.5706
203082	133.78	1.05488	11.978				68.1336	10.5805
203282	133.84	1.05576	11.978				68.1642	10.5894
203482	133.74	1.05679	11.981				68.1132	10.5997
203682	133.72	1.0578	11.977				68.103	10.6098
203882	133.7	1.0588	11.977				68.0929	10.6199
204082	133.62	1.05973	11.978				68.0521	10.6292
204282	133.64	1.06073	11.98				68.0623	10.6392
204482	133.66	1.06182	11.98				68.0725	10.6502
204682	133.7	1.0628	11.976				68.0929	10.66
204882	133.68	1.06381	11.979				68.0827	10.6701
205082	133.62	1.06483	11.977				68.0521	10.6803
205282	133.6	1.06584	11.981				68.0419	10.6905
205482	133.72	1.0668	11.979				68.103	10.7001
205682	133.7	1.0677	11.98				68.0929	10.7091
205882	133.62	1.06903	11.979				68.0521	10.7225
206082	133.68	1.06981	11.976				68.0827	10.7303
206282	133.6	1.07084	11.978				68.0419	10.7406
206482	133.56	1.07185	11.979				68.0215	10.7508
206682	133.66	1.07282	11.98				68.0725	10.7605
206882	133.62	1.07373	11.98				68.0521	10.7696
207082	133.66	1.07482	11.981				68.0725	10.7805
207282	133.56	1.07585	11.975				68.0215	10.7909
207482	133.6	1.07674	11.978				68.0419	10.7998
207682	133.54	1.07776	11.98				68.0114	10.81
207882	133.66	1.07872	11.979				68.0725	10.8197
208082	133.62	1.07983	11.981				68.0521	10.8308
208282	133.62	1.08083	11.98				68.0521	10.8408
208482	133.62	1.08173	11.977				68.0521	10.8498
208682	133.56	1.08285	11.982				68.0215	10.8611
208882	133.6	1.08374	11.977				68.0419	10.87
209082	133.62	1.08473	11.979				68.0521	10.8799
209282	133.74	1.08579	11.978				68.1132	10.8906
209482	133.66	1.08672	11.976				68.0725	10.8999
209682	133.6	1.08784	11.979				68.0419	10.9111
209882	133.58	1.08895	11.976				68.0317	10.9223
210082	133.66	1.08982	11.979				68.0725	10.931
210282	133.52	1.09097	11.979				68.0012	10.9425
210482	133.64	1.09193	11.981				68.0623	10.9522
210682	133.54	1.09286	11.975				68.0114	10.9615
210882	133.54	1.09386	11.979				68.0114	10.9715
211082	133.54	1.09496	11.979				68.0114	10.9825
211282	133.5	1.09597	11.978				67.991	10.9927
211482	133.52	1.09697	11.979				68.0012	11.0027
211682	133.46	1.09799	11.977				67.9706	11.0129
211882	133.32	1.09904	11.976				67.8993	11.0235
212082	133.42	1.1	11.979				67.9502	11.0331
212282	133.22	1.10117	11.981				67.8484	11.0448
212482	133.14	1.1022	11.981				67.8076	11.0552
212682	133.16	1.10319	11.977				67.8178	11.0651
212882	133.14	1.1042	11.978				67.8076	11.0752
213082	133.1	1.10512	11.978				67.7873	11.0845
213282	133.1	1.10632	11.978				67.7873	11.0965
213482	133.14	1.1072	11.98				67.8076	11.1053
213682	133.12	1.10821	11.978				67.7975	11.1154
213882	133.2	1.10918	11.978				67.8382	11.1252
214082	133.14	1.1103	11.979				67.8076	11.1364
214282	133.08	1.11122	11.981				67.7771	11.1456
214482	133.12	1.11221	11.979				67.7975	11.1556
214682	133.08	1.11322	11.978				67.7771	11.1657
214882	133.1	1.11422	11.978				67.7873	11.1757
215082	133.08	1.11522	11.975				67.7771	11.1858
215282	133.18	1.11629	11.978				67.828	11.1965
215482	133.12	1.11721	11.978				67.7975	11.2057
215682	133.08	1.11822	11.978				67.7771	11.2158
215882	133.04	1.11924	11.977				67.7567	11.2261
216082	133.06	1.12023	11.977				67.7669	11.236
216282	133.12	1.12121	11.978				67.7975	11.2458
216482	133.04	1.12234	11.98				67.7567	11.2572
216682	133.1	1.12312	11.979				67.7873	11.265
216882	133.08	1.12412	11.98				67.7771	11.275
217082	133.06	1.12523	11.982				67.7669	11.2862
217282	133.14	1.1262	11.977				67.8076	11.2959
217482	133.1	1.12722	11.98				67.7873	11.3061
217682	133.06	1.12833	11.977				67.7669	11.3173
217882	133.08	1.12932	11.977				67.7771	11.3272
218082	133.04	1.13024	11.976				67.7567	11.3364
218282	132.98	1.13126	11.976				67.7262	11.3466
218482	133.08	1.13212	11.978				67.7771	11.3553
218682	133.04	1.13314	11.979				67.7567	11.3655
218882	132.92	1.13418	11.978				67.6956	11.3759
219082	133	1.13505	11.978				67.7363	11.3847
219282	133	1.13605	11.978				67.7363	11.3947
219482	133.06	1.13723	11.982				67.7669	11.4065
219682	132.9	1.13829	11.979				67.6854	11.4172
219882	132.88	1.13919	11.979				67.6752	11.4262
220082	132.86	1.1402	11.979				67.665	11.4363
220282	132.92	1.14128	11.978				67.6956	11.4471
220482	132.82	1.14221	11.976				67.6447	11.4565
220682	132.82	1.14321	11.979				67.6447	11.4665
220882	132.86	1.1442	11.979				67.665	11.4764
221082	132.82	1.14521	11.978				67.6447	11.4866
221282	132.86	1.1462	11.978				67.665	11.4965
221482	132.84	1.14711	11.98				67.6549	11.5056
221682	132.9	1.14819	11.979				67.6854	11.5164
221882	132.82	1.14921	11.981				67.6447	11.5267
222082	132.78	1.15023	11.978				67.6243	11.5369
222282	132.8	1.15122	11.98				67.6345	11.5468
222482	132.68	1.15226	11.979				67.5734	11.5573
222682	132.74	1.15324	11.977				67.6039	11.5671
222882	132.66	1.15427	11.979				67.5632	11.5774
223082	132.8	1.15522	11.978				67.6345	11.587
223282	132.74	1.15624	11.976				67.6039	11.5972
223482	132.66	1.15717	11.979				67.5632	11.6065
223682	132.58	1.1582	11.981				67.5224	11.6169
223882	132.7	1.15926	11.979				67.5836	11.6275
224082	132.6	1.16019	11.98				67.5326	11.6368
224282	132.56	1.1611	11.981				67.5123	11.6459
224482	132.34	1.16208	11.979				67.4002	11.6558
224682	132	1.1626	11.981				67.227	11.661
224882	131.88	1.16404	11.978				67.1659	11.6754
225082	131.98	1.16571	11.977				67.2169	11.6922
225282	131.72	1.167	11.978				67.0844	11.7051
225482	131.56	1.16775	11.98				67.003	11.7126
225682	131.4	1.16851	11.979				66.9215	11.7203
225882	131.28	1.16945	11.977				66.8604	11.7297
226082	131.28	1.17005	11.978				66.8604	11.7357
226282	131.44	1.1712	11.98				66.9418	11.7472
226482	131.44	1.1723	11.978				66.9418	11.7583
226682	131.48	1.17348	11.982				66.9622	11.7701
226882	131.46	1.17459	11.984				66.952	11.7812
227082	131.52	1.17567	11.978				66.9826	11.7921
227282	131.52	1.17677	11.98				66.9826	11.8031
227482	131.58	1.17785	11.983				67.0131	11.8139
227682	131.5	1.17877	11.98				66.9724	11.8232
227882	131.46	1.17989	11.98				66.952	11.8344
228082	131.54	1.18086	11.98				66.9928	11.8441
228282	131.56	1.18185	11.978				67.003	11.8541
228482	131.46	1.18279	11.975				66.952	11.8635
228682	131.42	1.1836	11.978				66.9317	11.8716
228882	131.5	1.18457	11.978				66.9724	11.8813
229082	131.54	1.18556	11.98				66.9928	11.8913
229282	131.48	1.18658	11.98				66.9622	11.9015
229482	131.48	1.18758	11.982				66.9622	11.9115
229682	131.5	1.18857	11.979				66.9724	11.9215
229882	131.54	1.18956	11.979				66.9928	11.9314
230082	131.58	1.19055	11.978				67.0131	11.9413
230282	131.62	1.19163	11.978				67.0335	11.9522
230482	131.58	1.19255	11.978				67.0131	11.9614
230682	131.68	1.19341	11.978				67.0641	11.97
230882	131.54	1.19446	11.976				66.9928	11.9805
231082	131.52	1.19547	11.978				66.9826	11.9907
231282	131.62	1.19653	11.979				67.0335	12.0013
231482	131.7	1.1974	11.979				67.0743	12.01
231682	131.64	1.19833	11.978				67.0437	12.0194
231882	131.74	1.19929	11.979				67.0946	12.029
232082	131.76	1.20028	11.978				67.1048	12.0389
232282	131.7	1.2013	11.976				67.0743	12.0491
232482	131.64	1.20223	11.979				67.0437	12.0585
232682	131.82	1.20326	11.978				67.1354	12.0688
232882	131.66	1.20432	11.981				67.0539	12.0794
233082	131.7	1.2054	11.978				67.0743	12.0903
233282	131.62	1.20623	11.98				67.0335	12.0986
233482	131.68	1.20731	11.976				67.0641	12.1094
233682	131.58	1.20825	11.978				67.0131	12.1189
233882	131.6	1.20924	11.978				67.0233	12.1288
234082	131.56	1.21015	11.981				67.003	12.1379
234282	131.66	1.21092	11.98				67.0539	12.1456
234482	134.38	1.21047	11.986				68.4392	12.1411
234682	129.34	1.21343	11.991				65.8723	12.1708
234804	119.34	1.22023	11.976				60.7794	12.239
235004	119.52	1.21987	11.98				60.871	12.2354
235204	118.94	1.22087	11.976				60.5756	12.2454
235404	118.7	1.22165	11.978				60.4534	12.2533
235604	118.94	1.22267	11.98				60.5756	12.2635
235804	118.86	1.2241	11.979				60.5349	12.2778
236004	118.8	1.22502	11.978				60.5043	12.2871
236204	118.82	1.22591	11.98				60.5145	12.296
236404	118.92	1.22678	11.978				60.5655	12.3047
236604	118.88	1.22769	11.978				60.5451	12.3138
236804	119.1	1.22871	11.98				60.6571	12.3241
237004	119.04	1.22974	11.979				60.6266	12.3344
237204	119.14	1.2306	11.977				60.6775	12.343
237404	119.14	1.2316	11.981				60.6775	12.3531
237604	119.26	1.23246	11.978				60.7386	12.3617
237804	119.34	1.23333	11.976				60.7794	12.3704
238004	119.38	1.23432	11.977				60.7997	12.3803
238204	119.48	1.23528	11.978				60.8507	12.39
238404	119.56	1.23635	11.976				60.8914	12.4007
238604	119.72	1.2372	11.976				60.9729	12.4092
238804	119.82	1.23816	11.982				61.0238	12.4189
239004	120.06	1.23908	11.98				61.1461	12.4281
239204	120.12	1.24026	11.98				61.1766	12.4399
239404	120.2	1.24113	11.978				61.2174	12.4486
239604	120.32	1.24209	11.982				61.2785	12.4583
239804	120.44	1.24315	11.977				61.3396	12.4689
240004	120.54	1.24421	11.978				61.3905	12.4795
240204	120.6	1.24509	11.976				61.4211	12.4884
240404	120.64	1.24598	11.978				61.4414	12.4973
240604	120.78	1.24693	11.98				61.5127	12.5068
240804	120.86	1.2478	11.978				61.5535	12.5155
241004	120.98	1.24876	11.98				61.6146	12.5252
241204	121.02	1.24964	11.979				61.635	12.534
241404	121.3	1.25055	11.98				61.7776	12.5431
241604	121.26	1.25156	11.978				61.7572	12.5533
241804	121.42	1.2525	11.978				61.8387	12.5627
242004	121.6	1.25344	11.979				61.9304	12.5721
242204	121.68	1.25441	11.98				61.9711	12.5818
242404	121.72	1.2553	11.98				61.9915	12.5908
242604	121.92	1.25633	11.98				62.0933	12.6011
242804	122	1.2573	11.982				62.1341	12.6108
243004	122.04	1.25839	11.977				62.1545	12.6218
243204	122.08	1.25917	11.978				62.1748	12.6296
243404	122.18	1.26014	11.983				62.2258	12.6393
243604	122.32	1.26119	11.976				62.2971	12.6498
243804	122.32	1.26219	11.98				62.2971	12.6599
244004	122.5	1.26312	11.978				62.3887	12.6692
244204	122.56	1.2641	11.981				62.4193	12.679
244404	122.66	1.26507	11.979				62.4702	12.6888
244604	122.68	1.26616	11.978				62.4804	12.6997
244804	122.8	1.26692	11.975				62.5415	12.7073
245004	122.8	1.26782	11.978				62.5415	12.7163
245204	122.96	1.26896	11.978				62.623	12.7278
245404	123.06	1.26993	11.98				62.6739	12.7375
245604	123.1	1.27111	11.98				62.6943	12.7493
245804	123.24	1.27217	11.98				62.7656	12.76
246004	123.22	1.27327	11.977				62.7554	12.771
246204	123.3	1.27415	11.979				62.7962	12.7798
246404	123.38	1.27532	11.98				62.8369	12.7916
246604	123.34	1.27643	11.978				62.8165	12.8027
246804	123.26	1.27746	11.98				62.7758	12.813
247004	123.28	1.27845	11.978				62.786	12.823
247204	123.16	1.27949	11.979				62.7249	12.8334
247404	123.12	1.28051	11.976				62.7045	12.8436
247604	122.96	1.28156	11.979				62.623	12.8542
247804	122.82	1.28271	11.981				62.5517	12.8657
248004	122.7	1.28385	11.976				62.4906	12.8771
248204	122.48	1.28493	11.979				62.3786	12.888
248404	122.16	1.28584	11.975				62.2156	12.8971
248604	121.84	1.28696	11.98				62.0526	12.9083
248804	121.7	1.2878	11.978				61.9813	12.9168
249004	121.5	1.28867	11.977				61.8794	12.9255
249204	121.36	1.28962	11.978				61.8081	12.935
249404	121.2	1.29078	11.975				61.7267	12.9466
249604	121.26	1.29176	11.98				61.7572	12.9565
249804	120.92	1.29288	11.974				61.5841	12.9677
250004	120.96	1.29386	11.976				61.6044	12.9775
250204	120.78	1.29483	11.978				61.5127	12.9873
250404	120.8	1.29582	11.982				61.5229	12.9972
250604	120.68	1.29706	11.979				61.4618	13.0096
250804	120.72	1.29795	11.98				61.4822	13.0186
251004	120.64	1.29898	11.976				61.4414	13.0289
251204	120.56	1.3001	11.978				61.4007	13.0401
251404	120.58	1.3011	11.979				61.4109	13.0502
251604	120.48	1.30223	11.981				61.36	13.0615
251804	120.42	1.30315	11.978				61.3294	13.0707
252004	120.5	1.30402	11.979				61.3701	13.0794
252204	120.48	1.30503	11.98				61.36	13.0896
252404	120.58	1.3059	11.976				61.4109	13.0983
252604	120.54	1.30701	11.977				61.3905	13.1094
252804	120.56	1.308	11.98				61.4007	13.1194
253004	120.62	1.30878	11.977				61.4313	13.1272
253204	120.5	1.31002	11.978				61.3701	13.1396
253404	120.64	1.31098	11.976				61.4414	13.1492
253604	120.7	1.31195	11.979				61.472	13.159
253804	120.62	1.31298	11.979				61.4313	13.1693
254004	120.64	1.31398	11.978				61.4414	13.1793
254204	120.74	1.31494	11.982				61.4924	13.189
254404	120.68	1.31606	11.973				61.4618	13.2002
254604	120.7	1.31705	11.976				61.472	13.2101
254804	120.7	1.31795	11.976				61.472	13.2192
255004	120.66	1.31907	11.98				61.4516	13.2304
255204	120.7	1.32006	11.98				61.472	13.2403
255404	120.66	1.32107	11.979				61.4516	13.2505
255604	120.68	1.32216	11.978				61.4618	13.2614
255804	120.52	1.32322	11.978				61.3803	13.272
256004	120.48	1.32423	11.979				61.36	13.2821
256204	120.56	1.3251	11.979				61.4007	13.2909
256404	120.5	1.32622	11.979				61.3701	13.3021
256604	120.52	1.32722	11.98				61.3803	13.3121
256804	120.44	1.32825	11.978				61.3396	13.3225
257004	120.48	1.32933	11.981				61.36	13.3333
257204	120.46	1.33034	11.983				61.3498	13.3434
257404	120.4	1.33126	11.978				61.3192	13.3527
257604	120.34	1.33228	11.978				61.2887	13.3629
257804	120.32	1.33329	11.98				61.2785	13.373
258004	120.26	1.33431	11.984				61.2479	13.3832
258204	120.2	1.33523	11.98				61.2174	13.3925
258404	120.12	1.33646	11.977				61.1766	13.4048
258604	120.24	1.33732	11.978				61.2377	13.4134
258804	120.16	1.33844	11.976				61.197	13.4247
259004	120.06	1.33948	11.981				61.1461	13.4351
259204	119.92	1.34043	11.981				61.0748	13.4446
259404	119.84	1.34146	11.981				61.034	13.455
259604	119.86	1.34245	11.98				61.0442	13.4649
259804	119.74	1.34359	11.981				60.9831	13.4763
260004	119.76	1.34458	11.98				60.9933	13.4863
260204	119.66	1.34562	11.982				60.9423	13.4967
260404	119.6	1.34664	11.98				60.9118	13.5069
260604	119.62	1.34753	11.979				60.922	13.5158
260804	119.66	1.34852	11.978				60.9423	13.5258
261004	119.58	1.34945	11.981				60.9016	13.5351
261204	119.5	1.35047	11.977				60.8609	13.5453
261404	119.42	1.3515	11.978				60.8201	13.5557
261604	119.52	1.35267	11.978				60.871	13.5674
261804	119.46	1.35359	11.98				60.8405	13.5766
262004	119.4	1.35451	11.981				60.8099	13.5859
262204	119.38	1.35562	11.976				60.7997	13.597
262404	119.38	1.35672	11.979				60.7997	13.608
262604	119.26	1.35776	11.98				60.7386	13.6185
262804	119.16	1.35869	11.978				60.6877	13.6278
263004	119.3	1.35975	11.976				60.759	13.6384
263204	119.32	1.36064	11.979				60.7692	13.6473
263404	119.22	1.36177	11.981				60.7182	13.6587
263604	119.3	1.36275	11.98				60.759	13.6685
263804	119.2	1.36378	11.977				60.7081	13.6788
264004	119.24	1.36477	11.982				60.7284	13.6888
264204	119.24	1.36577	11.976				60.7284	13.6988
264404	119.12	1.36681	11.98				60.6673	13.7092
264604	119.16	1.36789	11.982				60.6877	13.7201
264804	119.06	1.36883	11.979				60.6368	13.7295
265004	119.2	1.36978	11.978				60.7081	13.739
265204	119.06	1.37093	11.978				60.6368	13.7506
265404	119.12	1.37191	11.978				60.6673	13.7604
265604	119.08	1.37292	11.979				60.6469	13.7705
265804	119.06	1.37393	11.981				60.6368	13.7806
266004	119.08	1.37502	11.98				60.6469	13.7916
266204	119.06	1.37603	11.979				60.6368	13.8017
266404	118.88	1.37709	11.975				60.5451	13.8123
266604	118.96	1.37786	11.978				60.5858	13.8201
266804	118.92	1.37888	11.979				60.5655	13.8303
267004	118.88	1.37979	11.977				60.5451	13.8394
267204	118.86	1.3808	11.976				60.5349	13.8495
267404	118.82	1.38171	11.977				60.5145	13.8587
267604	118.78	1.38273	11.976				60.4942	13.8689
267804	118.84	1.38371	11.977				60.5247	13.8787
268004	118.92	1.38468	11.98				60.5655	13.8885
268204	118.78	1.38573	11.981				60.4942	13.899
268404	118.88	1.38679	11.98				60.5451	13.9096
268604	118.74	1.38774	11.978				60.4738	13.9192
268804	118.84	1.38871	11.977				60.5247	13.9289
269004	118.78	1.38973	11.976				60.4942	13.9391
269204	118.78	1.39063	11.977				60.4942	13.9481
269404	118.88	1.39169	11.979				60.5451	13.9588
269604	118.92	1.39268	11.978				60.5655	13.9687
269804	118.9	1.39368	11.979				60.5553	13.9787
270004	118.94	1.39457	11.978				60.5756	13.9877
270204	118.94	1.39567	11.978				60.5756	13.9987
270404	118.86	1.3966	11.981				60.5349	14.008
270604	118.86	1.3976	11.981				60.5349	14.0181
270804	118.84	1.39861	11.979				60.5247	14.0282
271004	118.86	1.3995	11.981				60.5349	14.0371
271204	118.86	1.4005	11.981				60.5349	14.0471
271404	118.98	1.40156	11.982				60.596	14.0578
271604	118.82	1.40241	11.979				60.5145	14.0663
271804	118.88	1.40349	11.978				60.5451	14.0771
272004	118.96	1.40436	11.978				60.5858	14.0859
272204	118.88	1.40549	11.979				60.5451	14.0972
272404	118.94	1.40637	11.981				60.5756	14.106
272604	118.82	1.40751	11.982				60.5145	14.1175
272804	118.84	1.40841	11.979				60.5247	14.1265
273004	118.86	1.4095	11.979				60.5349	14.1374
273204	118.92	1.41048	11.982				60.5655	14.1472
273404	118.82	1.41151	11.98				60.5145	14.1576
273604	118.86	1.4126	11.979				60.5349	14.1685
273804	118.94	1.41367	11.98				60.5756	14.1792
274004	118.84	1.41471	11.979				60.5247	14.1897
274204	118.84	1.41571	11.974				60.5247	14.1997
274404	118.86	1.4167	11.981				60.5349	14.2096
274604	118.86	1.4176	11.978				60.5349	14.2187
274804	118.88	1.41859	11.979				60.5451	14.2286
275004	118.9	1.41958	11.982				60.5553	14.2385
275204	118.78	1.42053	11.982				60.4942	14.248
275404	118.8	1.42162	11.98				60.5043	14.259
275604	118.8	1.42262	11.98				60.5043	14.269
275804	118.84	1.42361	11.977				60.5247	14.2789
276004	118.8	1.42462	11.981				60.5043	14.2891
276204	118.78	1.42563	11.977				60.4942	14.2992
276404	118.72	1.42665	11.979				60.4636	14.3094
276604	118.68	1.42756	11.976				60.4432	14.3186
276804	118.74	1.42864	11.975				60.4738	14.3294
277004	118.62	1.42978	11.976				60.4127	14.3408
277204	118.7	1.43066	11.978				60.4534	14.3496
277404	118.78	1.43163	11.979				60.4942	14.3594
277604	118.64	1.43268	11.978				60.4229	14.3699
277804	118.68	1.43376	11.977				60.4432	14.3807
278004	118.66	1.43467	11.976				60.433	14.3899
278204	118.74	1.43564	11.978				60.4738	14.3996
278404	118.62	1.43668	11.98				60.4127	14.41
278604	118.62	1.43768	11.978				60.4127	14.4201
278804	118.64	1.43868	11.977				60.4229	14.4301
279004	118.58	1.4397	11.978				60.3923	14.4403
279204	118.6	1.44079	11.978				60.4025	14.4513
279404	118.68	1.44166	11.976				60.4432	14.46
279604	118.62	1.44278	11.978				60.4127	14.4712
279804	118.7	1.44375	11.976				60.4534	14.4809
280004	118.52	1.44482	11.979				60.3617	14.4917
280204	118.6	1.44569	11.978				60.4025	14.5004
280404	118.62	1.44668	11.979				60.4127	14.5103
280604	118.62	1.44768	11.978				60.4127	14.5204
280804	118.68	1.44866	11.978				60.4432	14.5302
281004	118.66	1.44967	11.979				60.433	14.5403
281204	118.7	1.45065	11.978				60.4534	14.5502
281404	118.7	1.45175	11.975				60.4534	14.5612
281604	118.7	1.45275	11.978				60.4534	14.5712
281804	118.68	1.45366	11.979				60.4432	14.5803
282004	118.68	1.45476	11.978				60.4432	14.5914
282204	118.62	1.45568	11.976				60.4127	14.6006
282404	118.64	1.45668	11.981				60.4229	14.6106
282604	118.66	1.45777	11.977				60.433	14.6216
282804	118.68	1.45876	11.979				60.4432	14.6315
283004	118.62	1.45968	11.981				60.4127	14.6407
283204	118.64	1.46078	11.978				60.4229	14.6518
283404	118.76	1.46173	11.98				60.484	14.6613
283604	118.74	1.46274	11.978				60.4738	14.6714
283804	118.64	1.46368	11.979				60.4229	14.6808
284004	118.62	1.46468	11.979				60.4127	14.6909
284204	118.66	1.46577	11.978				60.433	14.7018
284404	118.7	1.46665	11.978				60.4534	14.7106
284604	118.66	1.46767	11.978				60.433	14.7209
284804	118.72	1.46865	11.976				60.4636	14.7307
285004	118.7	1.46965	11.978				60.4534	14.7407
285204	118.76	1.47073	11.978				60.484	14.7516
285404	118.58	1.4717	11.981				60.3923	14.7613
285604	118.7	1.47265	11.975				60.4534	14.7708
285804	118.62	1.47368	11.978				60.4127	14.7811
286004	118.68	1.47466	11.976				60.4432	14.791
286204	118.64	1.47578	11.978				60.4229	14.8022
286404	118.7	1.47666	11.979				60.4534	14.811
286604	118.5	1.47772	11.978				60.3516	14.8217
286804	118.6	1.47879	11.979				60.4025	14.8324
287004	118.56	1.4799	11.978				60.3821	14.8435
287204	118.56	1.4808	11.978				60.3821	14.8526
287404	118.52	1.48182	11.981				60.3617	14.8628
287604	118.56	1.4827	11.978				60.3821	14.8716
287804	118.6	1.48379	11.982				60.4025	14.8825
288004	118.62	1.48468	11.98				60.4127	14.8915
288204	118.52	1.48572	11.981				60.3617	14.9019
288404	118.56	1.4866	11.982				60.3821	14.9107

## Sheet: F-7
Force (large)	--	journey	) Results Report
17:21:53,06/23/2019
Diameter: 50.0	mm	Height: 100.1	mm
Vertical force transducer (Test piece vertical force)
Control mode: force/confining pressure	Waveform: Slope
KN/s	Force the finish: 29.780	KN	Confining pressure rate :0.500	MPa/s	End point of confining pressure :15.0020	MPa
Time (ms)	Vertical force (KN)	Vertical deformation (mm)	Confining pressure (MPa)				stress	axial strain
0	0	0	0				0	0
200	0	-0.0007	0				0	-0.00699301
400	0.04	-0.00051	0				0.0203718	-0.00509491
600	0.26	-0.00059	0.004				0.132417	-0.00589411
801	0.5	-0.00067	0.012				0.254648	-0.00669331
1003	0.54	-0.00059	0.017				0.27502	-0.00589411
1204	0.8	-0.00048	0.028				0.407437	-0.0047952
1404	0.98	-0.00024	0.035				0.49911	-0.0023976
1604	1.16	0.00069	0.058				0.590783	0.00689311
1804	1.28	0.00215	0.084				0.651899	0.0214785
2005	1.6	0.00444	0.123				0.814873	0.0443556
2206	1.72	0.0077	0.18				0.875989	0.0769231
2406	1.86	0.01195	0.263				0.94729	0.119381
2606	2.12	0.01766	0.351				1.07971	0.176424
2806	2.44	0.02355	0.437				1.24268	0.235265
3007	2.76	0.02913	0.507				1.40566	0.291009
3208	3.06	0.03493	0.572				1.55845	0.348951
3408	3.1	0.03922	0.642				1.57882	0.391808
3608	3.34	0.04293	0.73				1.70105	0.428871
3808	3.64	0.04763	0.868				1.85384	0.475824
4009	3.84	0.05206	1.129				1.9557	0.52008
4211	4	0.0559	1.582				2.03718	0.558442
4412	4.18	0.05904	1.908				2.12886	0.58981
4612	4.3	0.0615	2.021				2.18997	0.614386
4812	4.46	0.06414	2.38				2.27146	0.640759
5012	4.6	0.06709	2.495				2.34276	0.67023
5213	4.7	0.07046	2.56				2.39369	0.703896
5414	5	0.07365	2.663				2.54648	0.735764
5614	5.2	0.07668	2.765				2.64834	0.766034
5814	5.42	0.0799	2.865				2.76038	0.798202
6014	5.68	0.08321	2.965				2.8928	0.831269
6215	6	0.0866	3.065				3.05577	0.865135
6416	6.28	0.0897	3.166				3.19838	0.896104
6616	6.32	0.09209	3.262				3.21875	0.91998
6816	6.5	0.09403	3.363				3.31042	0.939361
7016	6.64	0.09588	3.466				3.38172	0.957842
7217	6.8	0.09762	3.563				3.46321	0.975225
7419	6.96	0.09936	3.665				3.5447	0.992607
7620	7.16	0.10209	3.768				3.64656	1.01988
7820	7.52	0.10547	3.871				3.8299	1.05365
8020	7.78	0.10868	3.967				3.96232	1.08571
8220	8.04	0.11169	4.066				4.09474	1.11578
8421	8.18	0.11404	4.17				4.16604	1.13926
8622	8.28	0.1156	4.268				4.21697	1.15485
8822	8.48	0.11723	4.371				4.31883	1.17113
9022	8.66	0.11937	4.468				4.4105	1.19251
9222	8.76	0.12143	4.566				4.46143	1.21309
9423	8.98	0.12406	4.668				4.57348	1.23936
9624	9.26	0.12686	4.771				4.71608	1.26733
9824	9.52	0.12997	4.869				4.8485	1.2984
10024	9.76	0.13308	4.968				4.97073	1.32947
10224	10.04	0.13619	5.071				5.11333	1.36054
10425	10.18	0.13884	5.168				5.18463	1.38701
10627	10.36	0.14147	5.27				5.2763	1.41329
10828	10.64	0.14398	5.371				5.41891	1.43836
11028	10.76	0.14673	5.467				5.48002	1.46583
11228	11	0.14975	5.569				5.60225	1.496
11428	11.26	0.15276	5.669				5.73467	1.52607
11629	11.2	0.15378	5.768				5.70411	1.53626
11830	11.42	0.1553	5.872				5.81616	1.55145
12030	11.56	0.15695	5.971				5.88746	1.56793
12230	11.88	0.15954	6.072				6.05043	1.59381
12430	12.14	0.16235	6.17				6.18285	1.62188
12631	12.42	0.16515	6.272				6.32545	1.64985
12832	12.66	0.16777	6.373				6.44769	1.67602
13032	12.8	0.16972	6.471				6.51899	1.6955
13232	12.9	0.17088	6.571				6.56992	1.70709
13432	13.08	0.17232	6.674				6.66159	1.72148
13633	13.24	0.17397	6.77				6.74308	1.73796
13835	13.4	0.17581	6.87				6.82456	1.75634
14036	13.54	0.17786	6.971				6.89587	1.77682
14236	13.9	0.17994	7.073				7.07921	1.7976
14436	14.04	0.18209	7.174				7.15051	1.81908
14636	14.32	0.18399	7.275				7.29312	1.83806
14837	14.54	0.18601	7.372				7.40516	1.85824
15038	14.72	0.18815	7.474				7.49683	1.87962
15238	14.94	0.19017	7.576				7.60888	1.8998
15438	15.2	0.19208	7.676				7.7413	1.91888
15638	15.4	0.19401	7.774				7.84316	1.93816
15839	15.5	0.19598	7.873				7.89409	1.95784
16040	15.8	0.19787	7.976				8.04687	1.97672
16240	15.98	0.19981	8.074				8.13855	1.9961
16440	16.18	0.20174	8.174				8.24041	2.01538
16640	16.36	0.20347	8.274				8.33208	2.03267
16841	16.6	0.20519	8.377				8.45431	2.04985
17043	16.74	0.20714	8.476				8.52561	2.06933
17244	17.06	0.20883	8.578				8.68859	2.08621
17444	17.3	0.21055	8.68				8.81082	2.1034
17644	17.36	0.21212	8.777				8.84138	2.11908
17844	17.48	0.21398	8.877				8.90249	2.13766
18045	17.7	0.21551	8.979				9.01454	2.15295
18246	17.92	0.21733	9.079				9.12658	2.17113
18446	18.14	0.21895	9.182				9.23863	2.18731
18646	18.3	0.2206	9.28				9.32011	2.2038
18846	18.52	0.22222	9.377				9.43216	2.21998
19047	18.66	0.22377	9.481				9.50346	2.23546
19248	18.88	0.22539	9.582				9.61551	2.25165
19448	19.14	0.227	9.68				9.74792	2.26773
19648	19.3	0.22845	9.778				9.82941	2.28222
19848	19.4	0.23001	9.879				9.88034	2.2978
20049	19.6	0.23154	9.979				9.9822	2.31309
20250	19.76	0.23318	10.077				10.0637	2.32947
20450	20.02	0.23479	10.18				10.1961	2.34555
20650	20.16	0.23644	10.282				10.2674	2.36204
20850	20.52	0.23832	10.379				10.4508	2.38082
21051	20.74	0.24004	10.48				10.5628	2.398
21253	20.98	0.24176	10.579				10.685	2.41518
21454	21.16	0.24349	10.682				10.7767	2.43247
21654	21.38	0.24522	10.78				10.8887	2.44975
21854	21.7	0.2469	10.881				11.0517	2.46653
22054	21.76	0.24858	10.984				11.0823	2.48332
22255	21.9	0.25014	11.083				11.1536	2.4989
22456	22.18	0.25194	11.182				11.2962	2.51688
22656	22.46	0.25354	11.282				11.4388	2.53287
22856	22.68	0.25506	11.38				11.5508	2.54805
23056	22.82	0.25651	11.483				11.6221	2.56254
23257	23.06	0.25793	11.581				11.7444	2.57672
23458	23.14	0.2595	11.683				11.7851	2.59241
23658	23.34	0.26093	11.784				11.887	2.60669
23858	23.54	0.26236	11.883				11.9888	2.62098
24058	23.76	0.26358	11.982				12.1009	2.63317
24259	23.92	0.26503	12.085				12.1824	2.64765
24461	24.12	0.26646	12.184				12.2842	2.66194
24662	24.3	0.2678	12.284				12.3759	2.67532
24862	24.5	0.26923	12.384				12.4777	2.68961
25062	24.72	0.27045	12.484				12.5898	2.7018
25262	24.88	0.27179	12.585				12.6713	2.71518
25463	25.04	0.27314	12.686				12.7528	2.72867
25664	25.32	0.27454	12.787				12.8954	2.74266
25864	25.44	0.2759	12.886				12.9565	2.75624
26064	25.58	0.27725	12.986				13.0278	2.76973
26264	25.8	0.27847	13.086				13.1398	2.78192
26465	25.94	0.28002	13.186				13.2111	2.7974
26666	26.4	0.28226	13.286				13.4454	2.81978
26866	26.72	0.28495	13.386				13.6084	2.84665
27066	26.84	0.28661	13.489				13.6695	2.86324
27266	26.9	0.28759	13.588				13.7001	2.87303
27467	27.06	0.28853	13.686				13.7815	2.88242
27669	27.16	0.28949	13.789				13.8325	2.89201
27870	27.4	0.29051	13.889				13.9547	2.9022
28070	27.66	0.29182	13.993				14.0871	2.91528
28270	27.82	0.29316	14.087				14.1686	2.92867
28470	28.08	0.29497	14.188				14.301	2.94675
28671	28.4	0.29666	14.29				14.464	2.96364
28872	28.66	0.29847	14.391				14.5964	2.98172
29072	28.96	0.29996	14.491				14.7492	2.9966
29272	28.98	0.30116	14.588				14.7594	3.00859
29472	29.26	0.30236	14.689				14.902	3.02058
29673	29.36	0.30342	14.792				14.9529	3.03117
29874	29.4	0.30451	14.89				14.9733	3.04206
30074	29.72	0.3056	14.989				15.1363	3.05295
30274	29.78	0.30698	15.002				15.1668	3.06673
30414	29.98	0.30801	14.998				15.2687	3.07702
30447	29.98	0.30801	15.001				15.2687	3.07702
30647	30.02	0.30889	14.971				15.2891	3.08581
30847	30.02	0.30959	14.971				15.2891	3.09281
31048	30.08	0.31037	14.974				15.3196	3.1006
31248	30.2	0.31113	14.973				15.3807	3.10819
31450	30.3	0.3122	14.969				15.4317	3.11888
31651	30.44	0.31305	14.975				15.503	3.12737
31851	30.48	0.31423	14.975				15.5233	3.13916
32052	30.68	0.31526	14.975				15.6252	3.14945
32252	30.74	0.31644	14.972				15.6558	3.16124
32452	30.82	0.31741	14.973				15.6965	3.17093
32653	30.9	0.31849	14.973				15.7372	3.18172
32853	31.16	0.31929	14.974				15.8697	3.18971
33053	31.24	0.32037	14.973				15.9104	3.2005
33254	31.4	0.32121	14.973				15.9919	3.20889
33454	31.46	0.32219	14.975				16.0224	3.21868
33655	31.48	0.32318	14.971				16.0326	3.22857
33855	31.58	0.32405	14.971				16.0836	3.23726
34055	31.74	0.32499	14.971				16.165	3.24665
34256	31.9	0.32594	14.972				16.2465	3.25614
34456	32.04	0.32699	14.974				16.3178	3.26663
34658	32.2	0.32773	14.968				16.3993	3.27403
34859	32.24	0.32882	14.971				16.4197	3.28492
35059	32.36	0.32967	14.971				16.4808	3.29341
35260	32.4	0.33066	14.97				16.5012	3.3033
35460	32.58	0.3316	14.971				16.5929	3.31269
35660	32.76	0.33253	14.969				16.6845	3.32198
35861	32.86	0.3337	14.969				16.7355	3.33367
36061	32.88	0.33489	14.968				16.7456	3.34555
36261	33.02	0.33584	14.969				16.8169	3.35504
36462	33.06	0.33673	14.969				16.8373	3.36394
36662	33.2	0.33768	14.972				16.9086	3.37343
36863	33.32	0.33864	14.969				16.9697	3.38302
37063	33.48	0.33938	14.97				17.0512	3.39041
37263	33.48	0.34048	14.969				17.0512	3.4014
37464	33.54	0.34136	14.971				17.0818	3.41019
37664	33.78	0.34228	14.969				17.204	3.41938
37866	33.96	0.34331	14.974				17.2957	3.42967
38067	34.14	0.34425	14.971				17.3874	3.43906
38267	34.16	0.34514	14.97				17.3975	3.44795
38468	34.26	0.34621	14.97				17.4485	3.45864
38668	34.38	0.34717	14.973				17.5096	3.46823
38868	34.56	0.348	14.971				17.6013	3.47652
39069	34.56	0.3489	14.971				17.6013	3.48551
39269	34.78	0.34993	14.97				17.7133	3.4958
39469	34.8	0.35072	14.972				17.7235	3.5037
39670	35.02	0.35174	14.973				17.8355	3.51389
39870	35.06	0.35263	14.971				17.8559	3.52278
40071	35.2	0.35358	14.971				17.9272	3.53227
40271	35.38	0.35452	14.973				18.0189	3.54166
40471	35.48	0.35548	14.973				18.0698	3.55125
40672	35.6	0.35644	14.973				18.1309	3.56084
40872	35.58	0.35735	14.97				18.1207	3.56993
41074	35.82	0.35826	14.973				18.243	3.57902
41275	35.82	0.35916	14.973				18.243	3.58801
41475	35.94	0.36022	14.972				18.3041	3.5986
41676	36.1	0.36117	14.973				18.3856	3.60809
41876	36.2	0.36223	14.972				18.4365	3.61868
42076	36.32	0.36319	14.973				18.4976	3.62827
42277	36.58	0.3641	14.971				18.63	3.63736
42477	36.66	0.36507	14.973				18.6708	3.64705
42677	36.84	0.36601	14.972				18.7625	3.65644
42878	36.88	0.36699	14.973				18.7828	3.66623
43078	37	0.36795	14.972				18.8439	3.67582
43279	37.18	0.36899	14.97				18.9356	3.68621
43479	37.22	0.36997	14.97				18.956	3.696
43679	37.32	0.37084	14.971				19.0069	3.7047
43880	37.4	0.37181	14.972				19.0477	3.71439
44080	37.54	0.37276	14.973				19.119	3.72388
44282	37.56	0.37365	14.969				19.1292	3.73277
44483	37.78	0.37478	14.971				19.2412	3.74406
44683	37.88	0.37564	14.972				19.2921	3.75265
44884	38.12	0.37656	14.97				19.4144	3.76184
45084	38.16	0.37764	14.968				19.4347	3.77263
45284	38.3	0.3786	14.971				19.506	3.78222
45485	38.38	0.37957	14.971				19.5468	3.79191
45685	38.5	0.38063	14.972				19.6079	3.8025
45885	38.66	0.38157	14.971				19.6894	3.81189
46086	38.82	0.38251	14.973				19.7709	3.82128
46286	38.94	0.38347	14.972				19.832	3.83087
46487	39.02	0.38454	14.974				19.8727	3.84156
46687	39.14	0.3854	14.973				19.9338	3.85015
46887	39.16	0.38629	14.973				19.944	3.85904
47088	39.36	0.38722	14.974				20.0459	3.86833
47288	39.42	0.3882	14.974				20.0764	3.87812
47490	39.56	0.38915	14.975				20.1477	3.88761
47691	39.72	0.3901	14.973				20.2292	3.8971
47891	39.94	0.39102	14.973				20.3413	3.90629
48092	39.98	0.39191	14.973				20.3616	3.91518
48292	40.04	0.39289	14.971				20.3922	3.92498
48492	40.08	0.39397	14.972				20.4126	3.93576
48693	40.46	0.39494	14.972				20.6061	3.94545
48893	40.52	0.39652	14.971				20.6367	3.96124
49094	40.66	0.39737	14.972				20.708	3.96973
49294	40.76	0.39803	14.972				20.7589	3.97632
49494	40.76	0.39893	14.971				20.7589	3.98531
49695	41.02	0.39984	14.975				20.8913	3.99441
49895	41.04	0.40094	14.972				20.9015	4.00539
50095	41.18	0.40189	14.969				20.9728	4.01489
50296	41.22	0.40287	14.975				20.9932	4.02468
50496	41.34	0.40383	14.97				21.0543	4.03427
50697	41.38	0.40472	14.974				21.0747	4.04316
50897	41.6	0.40574	14.975				21.1867	4.05335
51097	41.8	0.40657	14.972				21.2886	4.06164
51298	41.84	0.40756	14.975				21.3089	4.07153
51498	41.94	0.40852	14.973				21.3599	4.08112
51700	42.06	0.40948	14.972				21.421	4.09071
51901	42.18	0.41064	14.971				21.4821	4.1023
52101	42.32	0.41159	14.971				21.5534	4.11179
52302	42.42	0.41245	14.969				21.6043	4.12038
52502	42.6	0.41339	14.97				21.696	4.12977
52702	42.72	0.41435	14.97				21.7571	4.13936
52903	42.82	0.41531	14.97				21.808	4.14895
53103	42.82	0.41621	14.971				21.808	4.15794
53303	43.12	0.41711	14.969				21.9608	4.16693
53504	43.14	0.418	14.969				21.971	4.17582
53704	43.16	0.41899	14.971				21.9812	4.18571
53905	43.3	0.41985	14.973				22.0525	4.19431
54105	43.42	0.4208	14.971				22.1136	4.2038
54305	43.52	0.42177	14.97				22.1646	4.21349
54506	43.64	0.42273	14.976				22.2257	4.22308
54706	43.74	0.42359	14.971				22.2766	4.23167
54908	43.84	0.42456	14.971				22.3275	4.24136
55109	43.98	0.42561	14.97				22.3988	4.25185
55309	44.24	0.42672	14.973				22.5312	4.26294
55510	44.42	0.42795	14.971				22.6229	4.27522
55710	44.52	0.42902	14.974				22.6738	4.28591
55910	44.52	0.42982	14.974				22.6738	4.29391
56111	44.5	0.43073	14.969				22.6637	4.303
56311	44.7	0.43156	14.97				22.7655	4.31129
56511	44.88	0.43249	14.968				22.8572	4.32058
56712	44.94	0.43357	14.969				22.8878	4.33137
56912	45.02	0.43454	14.971				22.9285	4.34106
57113	45.18	0.43559	14.972				23.01	4.35155
57313	45.34	0.43643	14.97				23.0915	4.35994
57513	45.4	0.43741	14.973				23.122	4.36973
57714	45.5	0.43828	14.971				23.173	4.37842
57914	45.64	0.43913	14.971				23.2443	4.38691
58116	45.72	0.4401	14.972				23.285	4.3966
58317	45.82	0.44116	14.973				23.3359	4.40719
58517	46.02	0.44199	14.969				23.4378	4.41548
58718	46.14	0.44315	14.972				23.4989	4.42707
58918	46.3	0.44399	14.972				23.5804	4.43546
59118	46.38	0.44497	14.973				23.6211	4.44525
59319	46.56	0.4459	14.972				23.7128	4.45455
59519	46.62	0.44688	14.971				23.7434	4.46434
59719	46.62	0.44788	14.969				23.7434	4.47433
59920	46.82	0.44881	14.974				23.8452	4.48362
60120	46.98	0.44976	14.97				23.9267	4.49311
60321	47.12	0.45091	14.971				23.998	4.5046
60521	47.22	0.45207	14.971				24.0489	4.51618
60721	47.32	0.45304	14.971				24.0999	4.52587
60922	47.48	0.45398	14.971				24.1814	4.53526
61122	47.58	0.45485	14.969				24.2323	4.54396
61324	47.6	0.45574	14.97				24.2425	4.55285
61525	47.82	0.45666	14.973				24.3545	4.56204
61725	47.86	0.45765	14.97				24.3749	4.57193
61926	48	0.4585	14.973				24.4462	4.58042
62126	48.04	0.45949	14.973				24.4666	4.59031
62326	48.2	0.46033	14.971				24.5481	4.5987
62527	48.32	0.46119	14.969				24.6092	4.60729
62727	48.48	0.46223	14.974				24.6907	4.61768
62927	48.54	0.46321	14.968				24.7212	4.62747
63128	48.74	0.46394	14.973				24.8231	4.63477
63328	48.86	0.4649	14.973				24.8842	4.64436
63529	49.02	0.46584	14.97				24.9657	4.65375
63729	49.08	0.46692	14.971				24.9962	4.66454
63929	49.16	0.46789	14.971				25.037	4.67423
64130	49.32	0.46894	14.972				25.1185	4.68472
64330	49.42	0.4699	14.973				25.1694	4.69431
64532	49.54	0.47096	14.974				25.2305	4.7049
64733	49.58	0.47195	14.971				25.2509	4.71479
64933	49.7	0.47291	14.974				25.312	4.72438
65134	50	0.4738	14.971				25.4648	4.73327
65334	50.1	0.47477	14.977				25.5157	4.74296
65534	50.2	0.47583	14.969				25.5667	4.75355
65735	50.16	0.47674	14.971				25.5463	4.76264
65935	50.44	0.47755	14.971				25.6889	4.77073
66135	50.54	0.47851	14.973				25.7398	4.78032
66336	50.72	0.47945	14.971				25.8315	4.78971
66536	50.78	0.48033	14.973				25.862	4.7985
66737	50.86	0.4813	14.971				25.9028	4.80819
66937	50.96	0.48216	14.972				25.9537	4.81678
67137	51.04	0.48314	14.973				25.9945	4.82657
67338	51.18	0.48409	14.971				26.0658	4.83606
67538	51.26	0.48506	14.971				26.1065	4.84575
67740	51.48	0.48618	14.973				26.2185	4.85694
67941	51.8	0.48757	14.969				26.3815	4.87083
68141	51.68	0.48841	14.971				26.3204	4.87922
68342	51.82	0.48906	14.971				26.3917	4.88571
68542	52.02	0.49009	14.969				26.4936	4.896
68742	52.2	0.49113	14.97				26.5852	4.90639
68943	52.3	0.4922	14.972				26.6362	4.91708
69143	52.38	0.49317	14.973				26.6769	4.92677
69344	52.5	0.49403	14.973				26.738	4.93536
69544	52.6	0.49499	14.97				26.789	4.94496
69744	52.78	0.49573	14.971				26.8806	4.95235
69945	52.82	0.49671	14.973				26.901	4.96214
70145	52.98	0.49756	14.972				26.9825	4.97063
70345	53.22	0.49857	14.973				27.1047	4.98072
70546	53.34	0.49983	14.972				27.1658	4.99331
70746	53.46	0.50089	14.973				27.227	5.0039
70947	53.52	0.50177	14.975				27.2575	5.01269
71147	53.64	0.50253	14.971				27.3186	5.02028
71347	53.68	0.50351	14.971				27.339	5.03007
71548	53.88	0.50434	14.973				27.4409	5.03836
71748	54	0.5053	14.973				27.502	5.04795
71950	54.2	0.50623	14.969				27.6038	5.05724
72151	54.16	0.50724	14.972				27.5835	5.06733
72351	54.36	0.50807	14.973				27.6853	5.07562
72552	54.54	0.50911	14.971				27.777	5.08601
72752	54.58	0.51	14.97				27.7974	5.09491
72952	54.72	0.51105	14.97				27.8687	5.10539
73153	54.98	0.51216	14.972				28.0011	5.11648
73353	55.12	0.51321	14.975				28.0724	5.12697
73553	55.16	0.51429	14.973				28.0928	5.13776
73754	55.34	0.51513	14.973				28.1844	5.14615
73954	55.46	0.51609	14.974				28.2455	5.15574
74155	55.44	0.517	14.971				28.2354	5.16484
74355	55.68	0.51781	14.973				28.3576	5.17293
74555	55.82	0.51876	14.971				28.4289	5.18242
74756	55.88	0.51964	14.973				28.4595	5.19121
74956	56	0.5207	14.971				28.5206	5.2018
75158	56.3	0.5217	14.974				28.6734	5.21179
75359	56.36	0.52267	14.97				28.7039	5.22148
75559	56.54	0.52371	14.972				28.7956	5.23187
75760	56.64	0.52478	14.971				28.8465	5.24256
75960	56.62	0.52578	14.974				28.8363	5.25255
76160	56.76	0.52653	14.971				28.9076	5.26004
76361	56.88	0.52749	14.973				28.9687	5.26963
76561	56.92	0.52848	14.973				28.9891	5.27952
76761	57.12	0.52941	14.975				29.091	5.28881
76962	57.3	0.53014	14.971				29.1827	5.2961
77162	57.34	0.53113	14.971				29.203	5.30599
77363	57.52	0.53207	14.972				29.2947	5.31538
77563	57.62	0.53303	14.973				29.3456	5.32498
77763	57.62	0.53393	14.975				29.3456	5.33397
77964	57.8	0.53487	14.97				29.4373	5.34336
78164	58.14	0.53605	14.974				29.6105	5.35514
78366	58.22	0.53732	14.972				29.6512	5.36783
78567	58.32	0.53839	14.973				29.7021	5.37852
78767	58.36	0.53897	14.973				29.7225	5.38432
78968	58.44	0.53965	14.972				29.7632	5.39111
79168	58.6	0.54059	14.971				29.8447	5.4005
79368	58.82	0.54151	14.969				29.9568	5.40969
79569	58.94	0.54247	14.972				30.0179	5.41928
79769	59.04	0.54344	14.974				30.0688	5.42897
79969	59.28	0.54435	14.972				30.1911	5.43806
80170	59.28	0.54555	14.971				30.1911	5.45005
80370	59.4	0.54641	14.971				30.2522	5.45864
80571	59.5	0.54728	14.973				30.3031	5.46733
80771	59.58	0.54825	14.975				30.3438	5.47702
80971	59.72	0.5492	14.973				30.4151	5.48651
81172	59.84	0.55016	14.971				30.4763	5.4961
81372	60.02	0.55099	14.973				30.5679	5.5044
81574	60.08	0.55207	14.973				30.5985	5.51518
81775	60.26	0.55301	14.969				30.6902	5.52458
81975	60.42	0.55395	14.969				30.7717	5.53397
82176	60.52	0.55492	14.969				30.8226	5.54366
82376	60.82	0.55621	14.97				30.9754	5.55654
82576	61	0.55745	14.97				31.067	5.56893
82777	60.92	0.55818	14.972				31.0263	5.57622
82977	61.06	0.55893	14.971				31.0976	5.58372
83177	61.16	0.55989	14.969				31.1485	5.59331
83378	61.24	0.56077	14.972				31.1893	5.6021
83578	61.38	0.56172	14.97				31.2606	5.61159
83779	61.54	0.56256	14.974				31.3421	5.61998
83979	61.7	0.5635	14.973				31.4236	5.62937
84179	61.78	0.56448	14.973				31.4643	5.63916
84380	61.94	0.56542	14.973				31.5458	5.64855
84580	62.06	0.56648	14.973				31.6069	5.65914
84782	62.12	0.56736	14.973				31.6375	5.66793
84983	62.28	0.5683	14.975				31.7189	5.67732
85183	62.5	0.56932	14.97				31.831	5.68751
85384	62.58	0.5701	14.971				31.8717	5.6953
85584	62.72	0.57105	14.969				31.943	5.7048
85784	62.92	0.57198	14.972				32.0449	5.71409
85985	62.92	0.57298	14.971				32.0449	5.72408
86185	63.06	0.57413	14.974				32.1162	5.73556
86385	63.16	0.57509	14.971				32.1671	5.74515
86586	63.34	0.57613	14.973				32.2588	5.75554
86786	63.46	0.57719	14.971				32.3199	5.76613
86987	63.66	0.57812	14.974				32.4218	5.77542
87187	63.7	0.57911	14.973				32.4421	5.78531
87387	63.84	0.57996	14.973				32.5134	5.79381
87588	63.92	0.58093	14.971				32.5542	5.8035
87788	64.18	0.58184	14.973				32.6866	5.81259
87990	64.36	0.58297	14.972				32.7783	5.82388
88191	64.46	0.58394	14.972				32.8292	5.83357
88391	64.66	0.58497	14.974				32.9311	5.84386
88592	64.7	0.58596	14.966				32.9514	5.85375
88792	64.8	0.58682	14.969				33.0024	5.86234
88992	64.96	0.58776	14.973				33.0839	5.87173
89193	65.08	0.58872	14.969				33.145	5.88132
89393	65.16	0.58969	14.972				33.1857	5.89101
89594	65.32	0.59054	14.969				33.2672	5.8995
89794	65.44	0.5915	14.97				33.3283	5.90909
89994	65.5	0.59247	14.971				33.3589	5.91878
90195	65.76	0.59348	14.971				33.4913	5.92887
90395	65.82	0.59436	14.972				33.5219	5.93766
90595	65.88	0.59524	14.969				33.5524	5.94645
90796	66	0.5962	14.973				33.6135	5.95604
90996	66.24	0.59712	14.971				33.7358	5.96523
91197	66.38	0.59807	14.973				33.8071	5.97473
91397	66.58	0.5991	14.974				33.9089	5.98501
91597	66.64	0.60008	14.969				33.9395	5.99481
91798	66.92	0.60108	14.973				34.0821	6.0048
91998	67.06	0.60223	14.971				34.1534	6.01628
92200	67.08	0.60322	14.973				34.1636	6.02617
92401	67.18	0.60399	14.973				34.2145	6.03387
92601	67.36	0.60512	14.969				34.3062	6.04515
92802	67.28	0.60585	14.971				34.2654	6.05245
93002	67.52	0.60677	14.969				34.3877	6.06164
93202	67.64	0.60753	14.97				34.4488	6.06923
93403	67.72	0.6085	14.975				34.4895	6.07892
93603	67.9	0.60943	14.969				34.5812	6.08821
93803	67.94	0.61042	14.97				34.6016	6.0981
94004	68.14	0.61135	14.971				34.7034	6.10739
94204	68.32	0.61229	14.973				34.7951	6.11678
94405	68.36	0.61337	14.969				34.8155	6.12757
94605	68.56	0.6142	14.971				34.9173	6.13586
94805	68.52	0.61522	14.973				34.8969	6.14605
95006	68.72	0.61615	14.973				34.9988	6.15534
95206	69	0.61705	14.971				35.1414	6.16434
95408	69.08	0.61792	14.974				35.1822	6.17303
95609	69.16	0.61899	14.972				35.2229	6.18372
95809	69.38	0.61992	14.969				35.3349	6.19301
96010	69.5	0.62107	14.971				35.3961	6.2045
96210	69.6	0.62204	14.969				35.447	6.21419
96410	69.76	0.62318	14.969				35.5285	6.22557
96611	69.92	0.62403	14.97				35.61	6.23407
96811	70.02	0.62509	14.97				35.6609	6.24466
97011	70.18	0.62594	14.97				35.7424	6.25315
97212	70.36	0.62687	14.97				35.8341	6.26244
97412	70.42	0.62785	14.973				35.8646	6.27223
97613	70.5	0.62883	14.971				35.9054	6.28202
97813	70.68	0.62976	14.975				35.997	6.29131
98013	70.84	0.63071	14.973				36.0785	6.3008
98214	70.9	0.63159	14.971				36.1091	6.30959
98414	71.02	0.63254	14.975				36.1702	6.31908
98616	71.22	0.63337	14.972				36.272	6.32737
98817	71.26	0.63436	14.97				36.2924	6.33726
99017	71.46	0.63509	14.969				36.3943	6.34456
99218	71.58	0.63645	14.974				36.4554	6.35814
99418	71.76	0.63748	14.971				36.5471	6.36843
99618	71.86	0.63845	14.973				36.598	6.37812
99819	72.1	0.63947	14.973				36.7202	6.38831
100019	72.1	0.64037	14.973				36.7202	6.3973
100219	72.16	0.64134	14.971				36.7508	6.40699
100420	72.32	0.64219	14.968				36.8323	6.41548
100620	72.52	0.64312	14.972				36.9341	6.42478
100821	72.6	0.64399	14.971				36.9749	6.43347
101021	72.84	0.64491	14.975				37.0971	6.44266
101221	72.98	0.64586	14.972				37.1684	6.45215
101422	73.04	0.64684	14.969				37.199	6.46194
101622	73.26	0.64796	14.971				37.311	6.47313
101824	73.4	0.64881	14.975				37.3823	6.48162
102025	73.52	0.64987	14.972				37.4434	6.49221
102225	73.62	0.65073	14.971				37.4944	6.5008
102426	73.74	0.65149	14.973				37.5555	6.50839
102626	73.86	0.65255	14.972				37.6166	6.51898
102826	73.98	0.65341	14.973				37.6777	6.52757
103027	74.1	0.65447	14.971				37.7388	6.53816
103227	74.22	0.65562	14.969				37.7999	6.54965
103427	74.34	0.65658	14.969				37.8611	6.55924
103628	74.58	0.6576	14.972				37.9833	6.56943
103828	74.7	0.65846	14.969				38.0444	6.57802
104029	74.88	0.65949	14.97				38.1361	6.58831
104229	74.98	0.66036	14.97				38.187	6.597
104429	75.04	0.66124	14.971				38.2176	6.60579
104630	75.2	0.66228	14.971				38.299	6.61618
104830	75.28	0.66305	14.972				38.3398	6.62388
105032	75.46	0.66409	14.971				38.4315	6.63427
105233	75.54	0.66496	14.971				38.4722	6.64296
105433	75.7	0.6659	14.973				38.5537	6.65235
105634	75.84	0.66696	14.971				38.625	6.66294
105834	76.08	0.66807	14.975				38.7472	6.67403
106034	76.2	0.66903	14.971				38.8083	6.68362
106235	76.3	0.66999	14.973				38.8593	6.69321
106435	76.4	0.67096	14.973				38.9102	6.7029
106635	76.48	0.67183	14.974				38.9509	6.71159
106836	76.66	0.67287	14.973				39.0426	6.72198
107036	76.8	0.67362	14.972				39.1139	6.72947
107237	76.92	0.67458	14.973				39.175	6.73906
107437	77.02	0.67564	14.972				39.226	6.74965
107637	77.06	0.67663	14.971				39.2463	6.75954
107838	77.34	0.67743	14.972				39.3889	6.76753
108038	77.38	0.67852	14.971				39.4093	6.77842
108240	77.54	0.67936	14.974				39.4908	6.78681
108441	77.74	0.68029	14.971				39.5927	6.7961
108641	77.82	0.68126	14.971				39.6334	6.80579
108842	77.98	0.68211	14.969				39.7149	6.81429
109042	78.04	0.68309	14.974				39.7454	6.82408
109242	78.28	0.6839	14.969				39.8677	6.83217
109443	78.4	0.68476	14.971				39.9288	6.84076
109643	78.5	0.68593	14.971				39.9797	6.85245
109844	78.58	0.6867	14.973				40.0205	6.86014
110044	78.72	0.68765	14.972				40.0918	6.86963
110244	78.88	0.68859	14.973				40.1733	6.87902
110445	78.96	0.68956	14.973				40.214	6.88871
110645	79.14	0.6904	14.972				40.3057	6.8971
110845	79.18	0.69139	14.975				40.326	6.90699
111046	79.4	0.69231	14.972				40.4381	6.91618
111246	79.5	0.69337	14.967				40.489	6.92677
111447	79.54	0.69426	14.973				40.5094	6.93566
111647	79.66	0.69522	14.973				40.5705	6.94525
111847	79.84	0.69616	14.971				40.6622	6.95465
112048	79.96	0.69711	14.97				40.7233	6.96414
112248	80.12	0.69816	14.972				40.8048	6.97463
112450	80.28	0.6993	14.97				40.8863	6.98601
112651	80.48	0.70023	14.968				40.9881	6.9953
112851	80.62	0.70128	14.971				41.0594	7.00579
113052	80.76	0.70223	14.972				41.1307	7.01528
113252	80.82	0.70331	14.974				41.1613	7.02607
113452	80.9	0.70419	14.971				41.202	7.03487
113653	81.08	0.70512	14.969				41.2937	7.04416
113853	81.2	0.70608	14.971				41.3548	7.05375
114053	81.42	0.7071	14.971				41.4669	7.06394
114254	81.46	0.70809	14.969				41.4872	7.07383
114454	81.5	0.70898	14.97				41.5076	7.08272
114655	81.76	0.70988	14.972				41.64	7.09171
114855	81.94	0.71082	14.973				41.7317	7.1011
115055	81.98	0.71181	14.974				41.7521	7.11099
115256	82.06	0.71288	14.972				41.7928	7.12168
115456	82.24	0.71362	14.973				41.8845	7.12907
115658	82.3	0.71469	14.971				41.915	7.13976
115859	82.5	0.71553	14.974				42.0169	7.14815
116059	82.68	0.71666	14.971				42.1086	7.15944
116260	82.82	0.71761	14.971				42.1799	7.16893
116460	82.84	0.71861	14.972				42.1901	7.17892
116660	83.04	0.71954	14.969				42.2919	7.18821
116861	83.06	0.72043	14.972				42.3021	7.1971
117061	83.24	0.72147	14.974				42.3938	7.20749
117261	83.36	0.72242	14.971				42.4549	7.21698
117462	83.44	0.7234	14.971				42.4956	7.22677
117662	83.5	0.72427	14.974				42.5262	7.23546
117863	83.66	0.72522	14.969				42.6077	7.24496
118063	83.92	0.72613	14.97				42.7401	7.25405
118263	83.96	0.72701	14.971				42.7605	7.26284
118464	83.98	0.72801	14.971				42.7707	7.27283
118664	84.02	0.72889	14.973				42.791	7.28162
118866	84.28	0.7298	14.972				42.9235	7.29071
119067	84.5	0.73083	14.97				43.0355	7.301
119267	84.7	0.73206	14.973				43.1374	7.31329
119468	84.86	0.7334	14.973				43.2188	7.32667
119668	84.88	0.73419	14.971				43.229	7.33457
119868	84.9	0.73498	14.974				43.2392	7.34246
120069	85.06	0.73583	14.973				43.3207	7.35095
120269	85.22	0.73647	14.975				43.4022	7.35734
120469	85.28	0.73745	14.97				43.4327	7.36713
120670	85.48	0.73848	14.971				43.5346	7.37742
120870	85.58	0.73945	14.971				43.5855	7.38711
121071	85.64	0.74043	14.973				43.6161	7.3969
121271	85.72	0.7413	14.971				43.6568	7.40559
121471	85.88	0.74224	14.97				43.7383	7.41499
121672	85.96	0.74321	14.971				43.7791	7.42468
121872	86.16	0.74404	14.971				43.8809	7.43297
122074	86.28	0.745	14.971				43.942	7.44256
122275	86.42	0.74605	14.971				44.0133	7.45305
122475	86.5	0.74703	14.972				44.0541	7.46284
122676	86.54	0.74801	14.971				44.0745	7.47263
122876	86.7	0.74896	14.973				44.1559	7.48212
123076	86.86	0.7499	14.97				44.2374	7.49151
123277	87.04	0.75094	14.973				44.3291	7.5019
123477	87.12	0.75181	14.969				44.3699	7.51059
123677	87.18	0.75269	14.975				44.4004	7.51938
123878	87.24	0.75367	14.973				44.431	7.52917
124078	87.38	0.75462	14.975				44.5023	7.53866
124279	87.56	0.75555	14.971				44.5939	7.54795
124479	87.78	0.75648	14.974				44.706	7.55724
124679	87.92	0.75743	14.975				44.7773	7.56673
124880	88.06	0.75848	14.973				44.8486	7.57722
125080	88.2	0.75943	14.972				44.9199	7.58671
125282	88.24	0.76042	14.971				44.9403	7.5966
125483	88.42	0.76125	14.969				45.0319	7.6049
125683	88.56	0.7623	14.971				45.1032	7.61538
125884	88.62	0.76328	14.973				45.1338	7.62517
126084	88.86	0.7641	14.969				45.256	7.63337
126284	88.96	0.76506	14.97				45.307	7.64296
126485	89.08	0.76602	14.972				45.3681	7.65255
126685	89.22	0.76697	14.971				45.4394	7.66204
126885	89.28	0.76785	14.974				45.4699	7.67083
127086	89.74	0.76929	14.969				45.7042	7.68521
127286	89.74	0.77079	14.971				45.7042	7.7002
127487	89.72	0.7715	14.972				45.694	7.70729
127687	89.8	0.77207	14.971				45.7348	7.71299
127887	90	0.7729	14.97				45.8366	7.72128
128088	90.14	0.77365	14.973				45.9079	7.72877
128288	90.22	0.77462	14.971				45.9487	7.73846
128490	90.34	0.77558	14.974				46.0098	7.74805
128691	90.54	0.77661	14.972				46.1116	7.75834
128891	90.74	0.77764	14.975				46.2135	7.76863
129092	90.78	0.77863	14.974				46.2339	7.77852
129292	90.92	0.77958	14.973				46.3052	7.78801
129492	90.94	0.78057	14.968				46.3154	7.7979
129693	91.22	0.78167	14.971				46.458	7.80889
129893	91.5	0.78298	14.971				46.6006	7.82198
130094	91.52	0.78397	14.971				46.6108	7.83187
130294	91.38	0.78472	14.969				46.5395	7.83936
130494	91.52	0.78557	14.971				46.6108	7.84785
130695	91.68	0.78641	14.971				46.6922	7.85624
130895	92	0.7876	14.969				46.8552	7.86813
131095	92.2	0.78883	14.97				46.9571	7.88042
131296	92.3	0.79	14.97				47.008	7.89211
131496	92.38	0.79067	14.97				47.0487	7.8988
131697	92.36	0.79147	14.969				47.0386	7.90679
131897	92.46	0.79234	14.971				47.0895	7.91548
132097	92.56	0.7932	14.973				47.1404	7.92408
132298	92.68	0.79426	14.97				47.2015	7.93467
132498	92.86	0.7952	14.975				47.2932	7.94406
132700	93	0.79625	14.971				47.3645	7.95455
132901	93.14	0.7972	14.973				47.4358	7.96404
133101	93.24	0.79827	14.971				47.4867	7.97473
133302	93.18	0.79929	14.971				47.4562	7.98492
133502	93.32	0.80014	14.971				47.5275	7.99341
133702	93.52	0.80107	14.974				47.6293	8.0027
133903	93.68	0.80191	14.969				47.7108	8.01109
134103	93.8	0.80277	14.973				47.7719	8.01968
134303	93.9	0.80384	14.972				47.8229	8.03037
134504	94	0.8047	14.97				47.8738	8.03896
134704	94.12	0.80566	14.969				47.9349	8.04855
134905	94.26	0.80671	14.972				48.0062	8.05904
135105	94.38	0.80777	14.97				48.0673	8.06963
135305	94.56	0.8087	14.973				48.159	8.07892
135506	94.68	0.80976	14.969				48.2201	8.08951
135706	94.76	0.81063	14.971				48.2609	8.0982
135908	94.84	0.81161	14.972				48.3016	8.10799
136109	94.92	0.81248	14.971				48.3424	8.11668
136309	95.02	0.81354	14.971				48.3933	8.12727
136510	95.18	0.81449	14.974				48.4748	8.13676
136710	95.24	0.81537	14.975				48.5053	8.14555
136910	95.4	0.81621	14.975				48.5868	8.15395
137111	95.54	0.81716	14.975				48.6581	8.16344
137311	95.72	0.8181	14.975				48.7498	8.17283
137511	95.82	0.81906	14.972				48.8007	8.18242
137712	95.92	0.82003	14.973				48.8517	8.19211
137912	96.04	0.82089	14.969				48.9128	8.2007
138113	96.12	0.82186	14.969				48.9535	8.21039
138313	96.28	0.823	14.97				49.035	8.22178
138513	96.46	0.82384	14.973				49.1267	8.23017
138714	96.48	0.82493	14.973				49.1369	8.24106
138914	96.64	0.82588	14.974				49.2183	8.25055
139116	96.84	0.82681	14.97				49.3202	8.25984
139317	96.88	0.82779	14.972				49.3406	8.26963
139517	97.02	0.82864	14.969				49.4119	8.27812
139718	97.14	0.8297	14.974				49.473	8.28871
139918	97.32	0.83054	14.971				49.5647	8.2971
140118	97.34	0.83163	14.971				49.5749	8.30799
140319	97.44	0.8325	14.971				49.6258	8.31668
140519	97.54	0.83346	14.974				49.6767	8.32627
140719	97.64	0.83443	14.969				49.7276	8.33596
140920	97.86	0.83535	14.973				49.8397	8.34515
141120	98.02	0.83639	14.975				49.9212	8.35554
141321	98.12	0.83726	14.972				49.9721	8.36424
141521	98.18	0.83814	14.97				50.0027	8.37303
141721	98.42	0.83905	14.972				50.1249	8.38212
141922	98.52	0.84032	14.971				50.1758	8.39481
142122	98.72	0.84135	14.973				50.2777	8.40509
142324	98.86	0.8425	14.971				50.349	8.41658
142525	98.96	0.84346	14.971				50.3999	8.42617
142725	99.02	0.84444	14.971				50.4305	8.43596
142926	99.26	0.84536	14.972				50.5527	8.44515
143126	99.26	0.84636	14.971				50.5527	8.45514
143326	99.36	0.84722	14.97				50.6036	8.46374
143527	99.48	0.84828	14.973				50.6647	8.47433
143727	99.74	0.84909	14.971				50.7972	8.48242
143927	99.8	0.85007	14.97				50.8277	8.49221
144128	99.9	0.85103	14.974				50.8787	8.5018
144328	99.98	0.85191	14.974				50.9194	8.51059
144529	100.06	0.85278	14.971				50.9601	8.51928
144729	100.16	0.85374	14.973				51.0111	8.52887
144929	100.26	0.85471	14.97				51.062	8.53856
145130	100.36	0.85577	14.975				51.1129	8.54915
145330	100.38	0.85657	14.971				51.1231	8.55714
145532	100.58	0.8574	14.975				51.225	8.56543
145733	100.76	0.85843	14.97				51.3166	8.57572
145933	101	0.85955	14.971				51.4389	8.58691
146134	101.04	0.86054	14.969				51.4592	8.5968
146334	101.1	0.86151	14.972				51.4898	8.60649
146534	101.26	0.86266	14.969				51.5713	8.61798
146735	101.32	0.86354	14.973				51.6019	8.62677
146935	101.42	0.8644	14.973				51.6528	8.63536
147135	101.44	0.8654	14.969				51.663	8.64535
147336	101.64	0.86623	14.972				51.7648	8.65365
147536	101.8	0.86727	14.972				51.8463	8.66404
147737	101.9	0.86814	14.973				51.8972	8.67273
147937	101.98	0.86901	14.972				51.938	8.68142
148137	102.14	0.87005	14.974				52.0195	8.69181
148338	102.24	0.87102	14.973				52.0704	8.7015
148538	102.34	0.87188	14.971				52.1213	8.71009
148740	102.48	0.87283	14.97				52.1926	8.71958
148941	102.62	0.87378	14.971				52.2639	8.72907
149141	102.72	0.87465	14.971				52.3149	8.73776
149342	102.84	0.87561	14.974				52.376	8.74735
149542	102.92	0.87658	14.971				52.4167	8.75704
149742	103	0.87745	14.971				52.4575	8.76573
149943	103.2	0.87838	14.975				52.5593	8.77502
150143	103.36	0.87952	14.974				52.6408	8.78641
150344	103.56	0.88055	14.971				52.7427	8.7967
150544	103.62	0.88163	14.973				52.7732	8.80749
150744	103.7	0.8825	14.972				52.814	8.81618
150945	103.86	0.88345	14.974				52.8955	8.82567
151145	103.92	0.88453	14.977				52.926	8.83646
151345	104.08	0.88537	14.971				53.0075	8.84486
151546	104.18	0.88644	14.973				53.0584	8.85554
151746	104.28	0.8873	14.973				53.1094	8.86414
151947	104.34	0.88838	14.972				53.1399	8.87493
152147	104.52	0.88912	14.97				53.2316	8.88232
152347	104.48	0.89013	14.972				53.2112	8.89241
152548	104.66	0.89107	14.971				53.3029	8.9018
152748	104.78	0.89203	14.97				53.364	8.91139
152950	104.92	0.89298	14.972				53.4353	8.92088
153151	105.06	0.89393	14.972				53.5066	8.93037
153351	105.28	0.89495	14.974				53.6187	8.94056
153552	105.4	0.89621	14.974				53.6798	8.95315
153752	105.58	0.89695	14.973				53.7715	8.96054
153952	105.66	0.89792	14.971				53.8122	8.97023
154153	105.68	0.89901	14.975				53.8224	8.98112
154353	105.86	0.89995	14.973				53.9141	8.99051
154553	105.86	0.90095	14.974				53.9141	9.0005
154754	105.96	0.90191	14.973				53.965	9.01009
154954	106.14	0.90275	14.973				54.0567	9.01848
155155	106.3	0.9038	14.971				54.1381	9.02897
155355	106.36	0.90457	14.97				54.1687	9.03666
155555	106.4	0.90556	14.97				54.1891	9.04655
155756	106.52	0.90652	14.974				54.2502	9.05614
155956	106.72	0.90735	14.971				54.352	9.06444
156158	106.8	0.90842	14.971				54.3928	9.07512
156359	106.86	0.9093	14.972				54.4234	9.08392
156559	106.98	0.91036	14.971				54.4845	9.09451
156760	107.16	0.91119	14.973				54.5761	9.1028
156960	107.14	0.9122	14.974				54.566	9.11289
157160	107.32	0.91314	14.971				54.6576	9.12228
157361	107.38	0.91412	14.975				54.6882	9.13207
157561	107.42	0.9151	14.973				54.7086	9.14186
157761	107.7	0.9159	14.972				54.8512	9.14985
157962	107.8	0.91707	14.971				54.9021	9.16154
158162	107.98	0.91811	14.973				54.9938	9.17193
158363	108.08	0.91907	14.974				55.0447	9.18152
158563	108.14	0.92005	14.969				55.0752	9.19131
158763	108.26	0.92091	14.971				55.1364	9.1999
158964	108.26	0.92201	14.971				55.1364	9.21089
159164	108.36	0.92287	14.969				55.1873	9.21948
159366	108.52	0.92382	14.97				55.2688	9.22897
159567	108.56	0.9248	14.972				55.2892	9.23876
159767	108.76	0.92573	14.974				55.391	9.24805
159968	108.82	0.92661	14.973				55.4216	9.25684
160168	109	0.92775	14.974				55.5132	9.26823
160368	109	0.92865	14.971				55.5132	9.27722
160569	109.12	0.92951	14.974				55.5744	9.28581
160769	109.26	0.93046	14.975				55.6457	9.2953
160969	109.42	0.9313	14.972				55.7271	9.3037
161170	109.62	0.93233	14.975				55.829	9.31399
161370	109.74	0.93349	14.97				55.8901	9.32557
161571	109.9	0.93453	14.971				55.9716	9.33596
161771	109.92	0.93563	14.971				55.9818	9.34695
161971	109.98	0.93671	14.971				56.0124	9.35774
162172	110.14	0.93755	14.969				56.0938	9.36613
162372	110.2	0.93853	14.969				56.1244	9.37592
162574	110.26	0.93951	14.971				56.155	9.38571
162775	110.42	0.94055	14.971				56.2364	9.3961
162975	110.48	0.94143	14.971				56.267	9.4049
163176	110.56	0.9424	14.971				56.3077	9.41459
163376	110.72	0.94335	14.97				56.3892	9.42408
163576	110.86	0.9442	14.969				56.4605	9.43257
163777	110.94	0.94527	14.973				56.5013	9.44326
163977	111.04	0.94604	14.971				56.5522	9.45095
164177	111.14	0.9471	14.969				56.6031	9.46154
164378	111.22	0.94797	14.971				56.6439	9.47023
164578	111.4	0.94891	14.973				56.7356	9.47962
164779	111.48	0.94988	14.973				56.7763	9.48931
164979	111.56	0.95075	14.973				56.817	9.498
165179	111.7	0.95171	14.97				56.8883	9.50759
165380	111.74	0.95269	14.972				56.9087	9.51738
165580	111.86	0.95365	14.971				56.9698	9.52697
165782	111.9	0.95454	14.973				56.9902	9.53586
165983	112.04	0.95549	14.971				57.0615	9.54535
166183	112.12	0.95656	14.972				57.1022	9.55604
166384	112.28	0.9574	14.973				57.1837	9.56444
166584	112.44	0.95845	14.971				57.2652	9.57493
166784	112.5	0.95933	14.973				57.2958	9.58372
166985	112.64	0.96038	14.971				57.3671	9.59421
167185	112.72	0.96135	14.975				57.4078	9.6039
167385	112.84	0.96231	14.969				57.4689	9.61349
167586	112.9	0.96328	14.972				57.4995	9.62318
167786	112.96	0.96426	14.973				57.5301	9.63297
167987	113.18	0.96519	14.973				57.6421	9.64226
168187	113.2	0.96618	14.972				57.6523	9.65215
168387	113.38	0.96722	14.972				57.744	9.66254
168588	113.46	0.96819	14.977				57.7847	9.67223
168788	113.56	0.96915	14.971				57.8356	9.68182
168990	113.68	0.97011	14.971				57.8967	9.69141
169191	113.82	0.97106	14.971				57.968	9.7009
169391	113.92	0.97203	14.973				58.019	9.71059
169592	114.02	0.97299	14.974				58.0699	9.72018
169792	114.06	0.97388	14.975				58.0903	9.72907
169992	114.14	0.97495	14.975				58.131	9.73976
170193	114.22	0.97582	14.973				58.1718	9.74845
170393	114.32	0.97689	14.975				58.2227	9.75914
170594	114.38	0.97777	14.973				58.2533	9.76793
170794	114.52	0.97882	14.973				58.3246	9.77842
170994	114.7	0.97956	14.974				58.4162	9.78581
171195	114.68	0.98066	14.973				58.406	9.7968
171395	114.88	0.98139	14.967				58.5079	9.8041
171595	115	0.98245	14.969				58.569	9.81469
171796	114.96	0.98366	14.971				58.5486	9.82677
171996	115.2	0.98468	14.972				58.6709	9.83696
172197	115.28	0.98565	14.974				58.7116	9.84665
172397	115.28	0.98655	14.975				58.7116	9.85564
172597	115.42	0.9875	14.969				58.7829	9.86513
172798	115.58	0.98845	14.969				58.8644	9.87463
172998	115.8	0.98927	14.971				58.9765	9.88282
173200	115.78	0.99038	14.973				58.9663	9.89391
173401	115.98	0.99121	14.974				59.0681	9.9022
173601	116.02	0.99219	14.973				59.0885	9.91199
173802	116.12	0.99326	14.975				59.1394	9.92268
174002	116.28	0.9942	14.972				59.2209	9.93207
174202	116.34	0.99508	14.973				59.2515	9.94086
174403	116.36	0.99617	14.972				59.2617	9.95175
174603	116.5	0.99702	14.972				59.333	9.96024
174803	116.68	0.99806	14.972				59.4246	9.97063
175004	116.72	0.99885	14.969				59.445	9.97852
175204	116.8	0.99992	14.974				59.4858	9.98921
175405	116.92	1.00078	14.969				59.5469	9.9978
175605	117.02	1.00184	14.971				59.5978	10.0084
175805	117.16	1.00269	14.973				59.6691	10.0169
176006	117.2	1.00388	14.973				59.6895	10.0288
176206	117.36	1.00482	14.97				59.771	10.0382
176408	117.46	1.00579	14.969				59.8219	10.0479
176609	117.66	1.00672	14.974				59.9237	10.0571
176809	117.68	1.00781	14.973				59.9339	10.068
177010	117.74	1.00869	14.973				59.9645	10.0768
177210	117.9	1.00953	14.974				60.046	10.0852
177410	118.06	1.01058	14.975				60.1275	10.0957
177611	118.04	1.01169	14.971				60.1173	10.1068
177811	118.28	1.0126	14.969				60.2395	10.1159
178011	118.14	1.01355	14.972				60.1682	10.1254
178212	118.34	1.01438	14.971				60.2701	10.1337
178412	118.42	1.01535	14.969				60.3108	10.1434
178613	118.46	1.01644	14.969				60.3312	10.1542
178813	118.54	1.01731	14.969				60.3719	10.1629
179013	118.78	1.01833	14.972				60.4942	10.1731
179214	118.8	1.01942	14.972				60.5043	10.184
179414	118.94	1.02037	14.971				60.5756	10.1935
179616	118.86	1.0214	14.973				60.5349	10.2038
179817	119.12	1.02221	14.971				60.6673	10.2119
180017	119.16	1.02329	14.971				60.6877	10.2227
180218	119.22	1.02427	14.974				60.7182	10.2325
180418	119.32	1.02514	14.974				60.7692	10.2412
180618	119.4	1.02611	14.973				60.8099	10.2508
180819	119.42	1.0272	14.97				60.8201	10.2617
181019	119.64	1.02803	14.971				60.9322	10.27
181219	119.7	1.029	14.972				60.9627	10.2797
181420	119.8	1.02997	14.973				61.0136	10.2894
181620	119.9	1.03084	14.97				61.0646	10.2981
181821	119.88	1.03194	14.972				61.0544	10.3091
182021	120	1.0329	14.972				61.1155	10.3187
182221	120.12	1.03396	14.971				61.1766	10.3293
182422	120.28	1.0348	14.971				61.2581	10.3377
182622	120.36	1.03567	14.972				61.2988	10.3464
182824	120.38	1.03677	14.973				61.309	10.3573
183025	120.66	1.03777	14.972				61.4516	10.3673
183225	120.66	1.03867	14.973				61.4516	10.3763
183426	120.74	1.03964	14.97				61.4924	10.386
183626	120.82	1.04061	14.972				61.5331	10.3957
183826	121	1.04165	14.972				61.6248	10.4061
184027	121.08	1.04262	14.973				61.6655	10.4158
184227	121.18	1.04359	14.971				61.7165	10.4255
184427	121.38	1.04462	14.971				61.8183	10.4358
184628	121.5	1.04567	14.973				61.8794	10.4463
184828	121.42	1.0466	14.973				61.8387	10.4555
185029	121.6	1.04744	14.97				61.9304	10.4639
185229	121.62	1.04843	14.971				61.9406	10.4738
185429	121.74	1.04939	14.967				62.0017	10.4834
185630	121.74	1.05039	14.969				62.0017	10.4934
185830	121.88	1.05134	14.972				62.073	10.5029
186032	122.06	1.05228	14.972				62.1646	10.5123
186233	122.08	1.05317	14.969				62.1748	10.5212
186433	122.24	1.05412	14.97				62.2563	10.5307
186634	122.18	1.05514	14.974				62.2258	10.5409
186834	122.22	1.05602	14.974				62.2461	10.5497
187034	122.34	1.05728	14.972				62.3073	10.5622
187235	122.4	1.05826	14.972				62.3378	10.572
187435	122.64	1.05908	14.974				62.46	10.5802
187635	122.74	1.06004	14.972				62.511	10.5898
187836	122.7	1.06105	14.972				62.4906	10.5999
188036	122.9	1.06188	14.969				62.5925	10.6082
188237	122.96	1.06286	14.97				62.623	10.618
188437	122.98	1.06386	14.973				62.6332	10.628
188637	123.06	1.06473	14.969				62.6739	10.6367
188838	123.16	1.06579	14.971				62.7249	10.6473
189038	123.3	1.06685	14.969				62.7962	10.6578
189240	123.44	1.0679	14.97				62.8675	10.6683
189441	123.52	1.06907	14.969				62.9082	10.68
189641	123.6	1.06994	14.97				62.949	10.6887
189842	123.74	1.07109	14.973				63.0203	10.7002
190042	123.78	1.07198	14.973				63.0406	10.7091
190242	123.98	1.07291	14.972				63.1425	10.7184
190443	123.92	1.07393	14.973				63.1119	10.7286
190643	123.9	1.07474	14.97				63.1018	10.7367
190844	124.06	1.07568	14.973				63.1832	10.7461
191044	124.16	1.07664	14.974				63.2342	10.7556
191244	124.3	1.07759	14.974				63.3055	10.7651
191445	124.36	1.07857	14.973				63.336	10.7749
191645	124.3	1.0796	14.971				63.3055	10.7852
191845	124.4	1.08056	14.972				63.3564	10.7948
192046	124.46	1.08154	14.973				63.387	10.8046
192246	124.5	1.08242	14.975				63.4073	10.8134
192447	124.66	1.08347	14.969				63.4888	10.8239
192647	124.7	1.08446	14.971				63.5092	10.8338
192847	124.72	1.08545	14.973				63.5194	10.8437
193048	124.84	1.08641	14.969				63.5805	10.8532
193248	124.98	1.08736	14.971				63.6518	10.8627
193450	125.04	1.08834	14.97				63.6823	10.8725
193651	125.08	1.08932	14.969				63.7027	10.8823
193851	125.3	1.09025	14.972				63.8148	10.8916
194052	125.3	1.09125	14.973				63.8148	10.9016
194252	125.38	1.09222	14.974				63.8555	10.9113
194452	125.52	1.09297	14.969				63.9268	10.9188
194653	125.56	1.09415	14.97				63.9472	10.9306
194853	125.62	1.09513	14.974				63.9777	10.9404
195053	125.66	1.09612	14.973				63.9981	10.9502
195254	125.8	1.09707	14.973				64.0694	10.9597
195454	125.78	1.09798	14.971				64.0592	10.9688
195655	125.92	1.09903	14.973				64.1305	10.9793
195855	125.98	1.09991	14.97				64.1611	10.9881
196055	126.14	1.10085	14.971				64.2426	10.9975
196256	126.24	1.10182	14.971				64.2935	11.0072
196456	126.32	1.10279	14.97				64.3342	11.0169
196658	126.38	1.10367	14.971				64.3648	11.0257
196859	126.46	1.10474	14.972				64.4055	11.0364
197059	126.54	1.10551	14.972				64.4463	11.0441
197260	126.62	1.10658	14.973				64.487	11.0547
197460	126.68	1.10756	14.967				64.5176	11.0645
197660	126.8	1.10852	14.975				64.5787	11.0741
197861	126.9	1.10959	14.973				64.6296	11.0848
198061	127.02	1.11054	14.971				64.6908	11.0943
198261	127.18	1.11149	14.973				64.7722	11.1038
198462	127.22	1.11257	14.974				64.7926	11.1146
198662	127.18	1.11349	14.973				64.7722	11.1238
198863	127.26	1.11456	14.97				64.813	11.1345
199063	127.36	1.11542	14.972				64.8639	11.1431
199263	127.4	1.11651	14.973				64.8843	11.1539
199464	127.5	1.11747	14.973				64.9352	11.1635
199664	127.6	1.11834	14.97				64.9861	11.1722
199866	127.64	1.11943	14.97				65.0065	11.1831
200067	127.6	1.12034	14.971				64.9861	11.1922
200267	127.72	1.1213	14.97				65.0473	11.2018
200468	127.82	1.12226	14.97				65.0982	11.2114
200668	127.92	1.12313	14.973				65.1491	11.2201
200868	128	1.1242	14.972				65.1899	11.2308
201069	128.08	1.12517	14.971				65.2306	11.2405
201269	128.2	1.12613	14.972				65.2917	11.25
201469	128.28	1.1271	14.973				65.3325	11.2597
201670	128.24	1.12802	14.972				65.3121	11.2689
201870	128.32	1.12909	14.969				65.3528	11.2796
202071	128.46	1.12994	14.969				65.4241	11.2881
202271	128.4	1.13106	14.971				65.3936	11.2993
202471	128.56	1.132	14.969				65.4751	11.3087
202672	128.68	1.13296	14.973				65.5362	11.3183
202872	128.76	1.13393	14.973				65.5769	11.328
203074	128.82	1.13491	14.971				65.6075	11.3378
203275	128.86	1.1359	14.971				65.6279	11.3477
203475	129.04	1.13694	14.972				65.7195	11.358
203676	129.16	1.13779	14.971				65.7806	11.3665
203876	129.18	1.13879	14.97				65.7908	11.3765
204076	129.26	1.13986	14.972				65.8316	11.3872
204277	129.4	1.14081	14.973				65.9029	11.3967
204477	129.48	1.14178	14.97				65.9436	11.4064
204677	129.52	1.14277	14.975				65.964	11.4163
204878	129.6	1.14394	14.973				66.0047	11.428
205078	129.68	1.14491	14.972				66.0455	11.4377
205279	129.72	1.1459	14.972				66.0659	11.4476
205479	129.86	1.14695	14.972				66.1372	11.458
205679	129.94	1.14782	14.973				66.1779	11.4667
205880	129.9	1.14874	14.971				66.1575	11.4759
206080	130	1.1497	14.971				66.2085	11.4855
206282	130.12	1.15056	14.969				66.2696	11.4941
206483	130.1	1.15167	14.971				66.2594	11.5052
206683	130.24	1.15262	14.971				66.3307	11.5147
206884	130.22	1.15362	14.969				66.3205	11.5247
207084	130.28	1.1545	14.973				66.3511	11.5335
207284	130.36	1.15557	14.973				66.3918	11.5442
207485	130.42	1.15655	14.971				66.4224	11.5539
207685	130.54	1.15751	14.969				66.4835	11.5635
207885	130.58	1.1584	14.97				66.5038	11.5724
208086	130.58	1.1595	14.971				66.5038	11.5834
208286	130.64	1.16038	14.971				66.5344	11.5922
208487	130.7	1.16136	14.972				66.565	11.602
208687	130.9	1.16228	14.973				66.6668	11.6112
208887	130.92	1.16318	14.97				66.677	11.6202
209088	131.04	1.16414	14.973				66.7381	11.6298
209288	131	1.16515	14.972				66.7178	11.6399
209490	131.12	1.16611	14.973				66.7789	11.6495
209691	131.14	1.1671	14.974				66.7891	11.6593
209891	131.34	1.16813	14.969				66.8909	11.6696
210092	131.32	1.16914	14.973				66.8807	11.6797
210292	131.32	1.17014	14.972				66.8807	11.6897
210492	131.5	1.17097	14.969				66.9724	11.698
210693	131.52	1.17197	14.973				66.9826	11.708
210893	131.6	1.17304	14.973				67.0233	11.7187
211094	131.62	1.17393	14.969				67.0335	11.7276
211294	131.72	1.175	14.973				67.0844	11.7383
211494	131.8	1.17597	14.973				67.1252	11.748
211695	131.88	1.17694	14.973				67.1659	11.7576
211895	131.96	1.17801	14.971				67.2067	11.7683
212095	131.9	1.17894	14.97				67.1761	11.7776
212296	132.06	1.17988	14.971				67.2576	11.787
212496	132.08	1.18087	14.969				67.2678	11.7969
212697	132.2	1.18183	14.973				67.3289	11.8065
212897	132.32	1.18289	14.973				67.39	11.8171
213097	132.38	1.18387	14.972				67.4206	11.8269
213298	132.48	1.18483	14.974				67.4715	11.8365
213498	132.54	1.18571	14.973				67.5021	11.8453
213700	132.62	1.18678	14.971				67.5428	11.8559
213901	132.72	1.18785	14.971				67.5937	11.8666
214101	132.7	1.18886	14.969				67.5836	11.8767
214302	132.82	1.19001	14.971				67.6447	11.8882
214502	132.8	1.19102	14.969				67.6345	11.8983
214702	132.84	1.19201	14.973				67.6549	11.9082
214903	132.9	1.19299	14.971				67.6854	11.918
215103	132.9	1.19398	14.968				67.6854	11.9279
215303	132.88	1.19489	14.971				67.6752	11.937
215504	132.96	1.19576	14.972				67.716	11.9457
215704	133.06	1.19673	14.97				67.7669	11.9553
215905	133.08	1.19782	14.973				67.7771	11.9662
216105	133.16	1.19869	14.971				67.8178	11.9749
216305	133.3	1.19964	14.975				67.8891	11.9844
216506	133.28	1.20065	14.969				67.8789	11.9945
216706	133.32	1.20154	14.97				67.8993	12.0034
216908	133.38	1.20252	14.975				67.9299	12.0132
217109	133.42	1.2035	14.972				67.9502	12.023
217309	133.62	1.20443	14.976				68.0521	12.0323
217510	133.6	1.20544	14.973				68.0419	12.0424
217710	133.7	1.20641	14.972				68.0929	12.052
217910	133.72	1.2075	14.975				68.103	12.0629
218111	133.8	1.20847	14.971				68.1438	12.0726
218311	133.78	1.20958	14.973				68.1336	12.0837
218511	133.88	1.21044	14.974				68.1845	12.0923
218712	133.92	1.21153	14.969				68.2049	12.1032
218912	133.96	1.21241	14.969				68.2253	12.112
219113	133.98	1.21331	14.973				68.2355	12.121
219313	134.1	1.21437	14.974				68.2966	12.1316
219513	134.14	1.21525	14.971				68.3169	12.1404
219714	134.14	1.21635	14.971				68.3169	12.1513
219914	134.26	1.21731	14.969				68.3781	12.1609
220116	134.36	1.21817	14.973				68.429	12.1695
220317	134.46	1.21934	14.977				68.4799	12.1812
220517	134.56	1.2203	14.973				68.5308	12.1908
220718	134.58	1.2214	14.973				68.541	12.2018
220918	134.56	1.2223	14.972				68.5308	12.2108
221118	134.7	1.22326	14.971				68.6021	12.2204
221319	134.76	1.22413	14.973				68.6327	12.2291
221519	134.7	1.22505	14.974				68.6021	12.2383
221719	134.64	1.22608	14.974				68.5716	12.2486
221920	134.72	1.22725	14.971				68.6123	12.2602
222120	134.84	1.22811	14.973				68.6734	12.2688
222321	134.9	1.22908	14.97				68.704	12.2785
222521	135.06	1.23013	14.973				68.7855	12.289
222721	135.08	1.23102	14.969				68.7957	12.2979
222922	135.14	1.232	14.971				68.8262	12.3077
223122	135.14	1.2329	14.971				68.8262	12.3167
223324	135.1	1.23392	14.971				68.8059	12.3269
223525	135.26	1.23486	14.973				68.8874	12.3363
223725	135.3	1.23584	14.972				68.9077	12.3461
223926	135.36	1.23682	14.971				68.9383	12.3558
224126	135.36	1.23792	14.97				68.9383	12.3668
224326	135.34	1.23883	14.97				68.9281	12.3759
224527	135.42	1.2399	14.973				68.9688	12.3866
224727	135.54	1.24076	14.971				69.03	12.3952
224927	135.56	1.24175	14.971				69.0401	12.4051
225128	135.62	1.24273	14.973				69.0707	12.4149
225328	135.68	1.24381	14.972				69.1013	12.4257
225529	135.78	1.24488	14.971				69.1522	12.4364
225729	135.78	1.24578	14.972				69.1522	12.4454
225929	135.88	1.24694	14.973				69.2031	12.4569
226130	135.86	1.24795	14.97				69.1929	12.467
226330	135.88	1.24894	14.973				69.2031	12.4769
226532	135.9	1.24973	14.969				69.2133	12.4848
226733	135.86	1.25085	14.97				69.1929	12.496
226933	136.04	1.25179	14.971				69.2846	12.5054
227134	136.06	1.25268	14.971				69.2948	12.5143
227334	136.08	1.25367	14.97				69.305	12.5242
227534	136.12	1.25466	14.971				69.3253	12.5341
227735	136.22	1.25562	14.971				69.3763	12.5437
227935	136.16	1.25674	14.973				69.3457	12.5548
228135	136.14	1.25785	14.971				69.3355	12.5659
228336	136.22	1.25872	14.97				69.3763	12.5746
228536	136.32	1.25969	14.969				69.4272	12.5843
228737	136.3	1.26049	14.973				69.417	12.5923
228937	136.38	1.26167	14.973				69.4578	12.6041
229137	136.44	1.26255	14.97				69.4883	12.6129
229338	136.48	1.26363	14.97				69.5087	12.6237
229538	136.5	1.26442	14.972				69.5189	12.6316
229740	136.54	1.26541	14.973				69.5393	12.6415
229941	136.58	1.2664	14.971				69.5596	12.6513
230141	136.56	1.2674	14.973				69.5494	12.6613
230342	136.68	1.26836	14.973				69.6106	12.6709
230542	136.74	1.26914	14.974				69.6411	12.6787
230742	136.98	1.27046	14.974				69.7633	12.6919
230943	137.14	1.2719	14.969				69.8448	12.7063
231143	137.06	1.27303	14.969				69.8041	12.7176
231344	137.02	1.27384	14.97				69.7837	12.7257
231544	136.96	1.27476	14.97				69.7532	12.7349
231744	136.9	1.27549	14.971				69.7226	12.7422
231945	136.98	1.27636	14.973				69.7633	12.7508
232145	137.08	1.27742	14.974				69.8143	12.7614
232345	137.14	1.2784	14.973				69.8448	12.7712
232546	137.12	1.27951	14.971				69.8346	12.7823
232746	137.18	1.28049	14.969				69.8652	12.7921
232947	137.36	1.28142	14.974				69.9569	12.8014
233147	137.3	1.28254	14.969				69.9263	12.8126
233347	137.32	1.28354	14.971				69.9365	12.8226
233548	137.24	1.28437	14.972				69.8958	12.8309
233748	137.3	1.28544	14.969				69.9263	12.8416
233950	137.3	1.28644	14.973				69.9263	12.8515
234151	137.4	1.28741	14.971				69.9772	12.8612
234351	137.44	1.2885	14.97				69.9976	12.8721
234552	137.52	1.28927	14.973				70.0384	12.8798
234752	137.56	1.29035	14.973				70.0587	12.8906
234952	137.54	1.29126	14.973				70.0485	12.8997
235153	137.56	1.29225	14.969				70.0587	12.9096
235353	137.62	1.29333	14.972				70.0893	12.9204
235553	137.58	1.29425	14.974				70.0689	12.9296
235754	137.7	1.29531	14.973				70.13	12.9402
235954	137.76	1.29618	14.971				70.1606	12.9489
236155	137.88	1.29724	14.974				70.2217	12.9594
236355	137.72	1.2983	14.971				70.1402	12.97
236555	137.8	1.29927	14.972				70.181	12.9797
236756	137.78	1.30018	14.971				70.1708	12.9888
236956	137.9	1.30114	14.972				70.2319	12.9984
237158	137.9	1.30213	14.973				70.2319	13.0083
237359	137.94	1.30302	14.971				70.2523	13.0172
237559	138.04	1.30409	14.97				70.3032	13.0279
237760	138.04	1.30509	14.972				70.3032	13.0379
237960	138.06	1.30598	14.972				70.3134	13.0468
238160	138.02	1.30709	14.972				70.293	13.0578
238361	138.1	1.30797	14.971				70.3338	13.0666
238561	138.18	1.30894	14.975				70.3745	13.0763
238761	138.18	1.31004	14.975				70.3745	13.0873
238962	138.18	1.31104	14.972				70.3745	13.0973
239162	138.3	1.31209	14.972				70.4356	13.1078
239363	138.34	1.31308	14.972				70.456	13.1177
239563	138.32	1.31419	14.974				70.4458	13.1288
239763	138.4	1.31506	14.974				70.4865	13.1375
239964	138.5	1.31603	14.974				70.5375	13.1472
240164	138.46	1.31704	14.972				70.5171	13.1572
240366	138.54	1.31791	14.973				70.5578	13.1659
240567	138.44	1.31895	14.972				70.5069	13.1763
240767	138.56	1.3199	14.972				70.568	13.1858
240968	138.72	1.32095	14.974				70.6495	13.1963
241168	138.74	1.32194	14.974				70.6597	13.2062
241368	138.76	1.32303	14.973				70.6699	13.2171
241569	138.74	1.32414	14.972				70.6597	13.2282
241769	138.88	1.32499	14.973				70.731	13.2367
241969	138.84	1.32601	14.97				70.7106	13.2469
242170	138.78	1.32693	14.97				70.6801	13.256
242370	138.82	1.32811	14.969				70.7004	13.2678
242571	138.82	1.32911	14.971				70.7004	13.2778
242771	138.96	1.33006	14.97				70.7717	13.2873
242971	138.92	1.33088	14.972				70.7514	13.2955
243172	138.98	1.33186	14.972				70.7819	13.3053
243372	139.14	1.3328	14.971				70.8634	13.3147
243574	139.06	1.33393	14.973				70.8227	13.326
243775	139.16	1.33489	14.975				70.8736	13.3356
243975	139.1	1.33592	14.97				70.843	13.3459
244176	139.06	1.33683	14.973				70.8227	13.3549
244376	139.1	1.33782	14.972				70.843	13.3648
244576	139.24	1.33877	14.973				70.9143	13.3743
244777	139.2	1.33978	14.971				70.894	13.3844
244977	139.24	1.34077	14.971				70.9143	13.3943
245177	139.28	1.34165	14.975				70.9347	13.4031
245378	139.26	1.34276	14.97				70.9245	13.4142
245578	139.38	1.34372	14.973				70.9857	13.4238
245779	139.42	1.3446	14.973				71.006	13.4326
245979	139.44	1.3456	14.973				71.0162	13.4426
246179	139.36	1.34672	14.975				70.9755	13.4537
246380	139.46	1.34759	14.971				71.0264	13.4624
246580	139.46	1.34859	14.974				71.0264	13.4724
246782	139.46	1.34959	14.97				71.0264	13.4824
246983	139.58	1.35065	14.972				71.0875	13.493
247183	139.58	1.35165	14.97				71.0875	13.503
247384	139.6	1.35264	14.97				71.0977	13.5129
247584	139.5	1.35357	14.969				71.0468	13.5222
247784	139.6	1.35454	14.971				71.0977	13.5319
247985	139.6	1.35554	14.971				71.0977	13.5419
248185	139.64	1.35643	14.973				71.1181	13.5507
248385	139.72	1.3575	14.97				71.1588	13.5614
248586	139.78	1.35848	14.97				71.1894	13.5712
248786	139.72	1.3595	14.971				71.1588	13.5814
248987	139.76	1.36048	14.972				71.1792	13.5912
249187	139.86	1.36155	14.973				71.2301	13.6019
249387	139.78	1.36248	14.975				71.1894	13.6112
249588	139.88	1.36344	14.972				71.2403	13.6208
249788	139.9	1.36444	14.975				71.2505	13.6308
249990	139.96	1.36541	14.974				71.281	13.6405
250191	139.92	1.36653	14.973				71.2607	13.6516
250391	139.88	1.36744	14.973				71.2403	13.6607
250592	139.9	1.36854	14.967				71.2505	13.6717
250792	140	1.3695	14.971				71.3014	13.6813
250992	140.04	1.37049	14.967				71.3218	13.6912
251193	139.98	1.37161	14.97				71.2912	13.7024
251393	140.02	1.37249	14.972				71.3116	13.7112
251594	140	1.3735	14.971				71.3014	13.7213
251794	140.1	1.37467	14.972				71.3523	13.733
251994	140.06	1.37568	14.969				71.332	13.7431
252195	140.14	1.37665	14.969				71.3727	13.7527
252395	140.22	1.37752	14.971				71.4135	13.7614
252595	140.24	1.37842	14.969				71.4236	13.7704
252796	140.16	1.37964	14.969				71.3829	13.7826
252996	140.28	1.3805	14.971				71.444	13.7912
253197	140.24	1.38142	14.969				71.4236	13.8004
253397	140.18	1.38254	14.969				71.3931	13.8116
253597	140.16	1.38354	14.97				71.3829	13.8216
253798	140.26	1.38441	14.971				71.4338	13.8303
253998	140.16	1.38544	14.967				71.3829	13.8406
254200	140.3	1.38649	14.971				71.4542	13.851
254401	140.22	1.38752	14.974				71.4135	13.8613
254601	140.28	1.3884	14.971				71.444	13.8701
254802	140.24	1.38932	14.97				71.4236	13.8793
255002	140.4	1.39026	14.974				71.5051	13.8887
255202	140.42	1.39135	14.971				71.5153	13.8996
255403	140.36	1.39257	14.971				71.4848	13.9118
255603	140.48	1.39363	14.973				71.5459	13.9224
255803	140.44	1.39465	14.972				71.5255	13.9326
256004	140.46	1.39574	14.968				71.5357	13.9435
256204	140.48	1.39673	14.973				71.5459	13.9533
256405	140.64	1.39778	14.969				71.6274	13.9638
256605	140.6	1.39879	14.973				71.607	13.9739
256805	140.64	1.39968	14.973				71.6274	13.9828
257006	140.56	1.4007	14.973				71.5866	13.993
257206	140.56	1.4017	14.974				71.5866	14.003
257408	140.64	1.40278	14.971				71.6274	14.0138
257609	140.54	1.40371	14.973				71.5764	14.0231
257809	140.68	1.40476	14.974				71.6477	14.0336
258010	140.66	1.40587	14.973				71.6375	14.0447
258210	140.62	1.40678	14.971				71.6172	14.0537
258410	140.64	1.40788	14.975				71.6274	14.0647
258611	140.6	1.40879	14.972				71.607	14.0738
258811	140.7	1.40975	14.971				71.6579	14.0834
259011	140.68	1.41076	14.975				71.6477	14.0935
259212	140.74	1.41174	14.97				71.6783	14.1033
259412	140.74	1.41274	14.97				71.6783	14.1133
259613	140.82	1.41361	14.972				71.719	14.122
259813	140.84	1.41471	14.972				71.7292	14.133
260013	140.88	1.41569	14.972				71.7496	14.1428
260214	140.84	1.41671	14.971				71.7292	14.1529
260414	140.86	1.4176	14.972				71.7394	14.1618
260616	140.86	1.4187	14.973				71.7394	14.1728
260817	140.88	1.41969	14.971				71.7496	14.1827
261017	140.9	1.42079	14.968				71.7598	14.1937
261218	140.86	1.4217	14.973				71.7394	14.2028
261418	140.84	1.42271	14.971				71.7292	14.2129
261618	140.86	1.4237	14.973				71.7394	14.2228
261819	140.92	1.42468	14.968				71.77	14.2326
262019	140.94	1.42557	14.973				71.7802	14.2415
262219	140.98	1.42666	14.972				71.8005	14.2523
262420	141.02	1.42744	14.969				71.8209	14.2601
262620	141	1.42855	14.973				71.8107	14.2712
262821	141.02	1.42944	14.971				71.8209	14.2801
263021	140.96	1.43056	14.968				71.7903	14.2913
263221	141.04	1.43154	14.971				71.8311	14.3011
263422	141.04	1.43254	14.971				71.8311	14.3111
263622	141.1	1.43352	14.971				71.8616	14.3209
263824	141.02	1.43444	14.972				71.8209	14.3301
264025	141.04	1.43564	14.972				71.8311	14.3421
264225	141.08	1.43662	14.973				71.8515	14.3518
264426	141.1	1.43762	14.972				71.8616	14.3618
264626	141.04	1.43864	14.971				71.8311	14.372
264826	141.08	1.43952	14.973				71.8515	14.3808
265027	141.18	1.44049	14.97				71.9024	14.3905
265227	141.14	1.4416	14.971				71.882	14.4016
265427	141.24	1.44257	14.974				71.9329	14.4113
265628	141.22	1.44347	14.973				71.9228	14.4203
265828	141.26	1.44446	14.973				71.9431	14.4302
266029	141.24	1.44547	14.972				71.9329	14.4403
266229	141.16	1.44639	14.974				71.8922	14.4495
266429	141.32	1.44754	14.971				71.9737	14.4609
266630	141.28	1.44855	14.972				71.9533	14.471
266830	141.36	1.44952	14.971				71.9941	14.4807
267032	141.34	1.45043	14.971				71.9839	14.4898
267233	141.34	1.45153	14.97				71.9839	14.5008
267433	141.3	1.45254	14.973				71.9635	14.5109
267634	141.34	1.45343	14.972				71.9839	14.5198
267834	141.36	1.45452	14.972				71.9941	14.5307
268034	141.44	1.4554	14.973				72.0348	14.5395
268235	141.42	1.4563	14.974				72.0246	14.5485
268435	141.32	1.45744	14.974				71.9737	14.5598
268635	141.34	1.45843	14.971				71.9839	14.5697
268836	141.38	1.45942	14.973				72.0042	14.5796
269036	141.34	1.46043	14.972				71.9839	14.5897
269237	141.46	1.46149	14.973				72.045	14.6003
269437	141.42	1.4624	14.975				72.0246	14.6094
269637	141.4	1.46341	14.973				72.0144	14.6195
269838	141.5	1.46448	14.971				72.0654	14.6302
270038	141.52	1.46547	14.972				72.0755	14.6401
270240	141.48	1.46648	14.969				72.0552	14.6501
270441	141.46	1.46739	14.97				72.045	14.6592
270641	141.46	1.46849	14.97				72.045	14.6702
270842	141.5	1.46948	14.971				72.0654	14.6801
271042	141.5	1.47057	14.973				72.0654	14.691
271242	141.48	1.47148	14.972				72.0552	14.7001
271443	141.48	1.47238	14.971				72.0552	14.7091
271643	141.52	1.47347	14.969				72.0755	14.72
271844	141.58	1.47445	14.97				72.1061	14.7298
272044	141.5	1.47547	14.971				72.0654	14.74
272244	141.54	1.47656	14.972				72.0857	14.7508
272445	141.58	1.47745	14.972				72.1061	14.7597
272645	141.64	1.47833	14.973				72.1367	14.7685
272845	141.62	1.47933	14.971				72.1265	14.7785
273046	141.62	1.48033	14.974				72.1265	14.7885
273246	141.6	1.48134	14.972				72.1163	14.7986
273447	141.58	1.48245	14.973				72.1061	14.8097
273647	141.48	1.48338	14.971				72.0552	14.819
273847	141.48	1.48438	14.971				72.0552	14.829
274048	141.56	1.48545	14.973				72.0959	14.8397
274248	141.5	1.48658	14.969				72.0654	14.8509
274450	141.56	1.48745	14.972				72.0959	14.8596
274651	141.62	1.48843	14.97				72.1265	14.8694
274851	141.6	1.48954	14.971				72.1163	14.8805
275052	141.62	1.49033	14.974				72.1265	14.8884
275252	141.5	1.49137	14.971				72.0654	14.8988
275452	141.54	1.49236	14.97				72.0857	14.9087
275653	141.66	1.49332	14.971				72.1468	14.9183
275853	141.6	1.49434	14.97				72.1163	14.9285
276053	141.68	1.49531	14.971				72.157	14.9382
276254	141.64	1.49643	14.973				72.1367	14.9494
276454	141.64	1.49743	14.971				72.1367	14.9593
276655	141.64	1.49843	14.974				72.1367	14.9693
276855	141.66	1.49952	14.975				72.1468	14.9802
277055	141.66	1.50052	14.973				72.1468	14.9902
277256	141.64	1.50143	14.971				72.1367	14.9993
277456	141.72	1.5025	14.974				72.1774	15.01
277658	141.68	1.50341	14.971				72.157	15.0191
277859	141.68	1.50441	14.97				72.157	15.0291
278059	141.78	1.50538	14.975				72.208	15.0388
278260	141.6	1.50644	14.973				72.1163	15.0494
278460	141.7	1.50751	14.973				72.1672	15.06
278660	141.72	1.5085	14.971				72.1774	15.0699
278861	141.66	1.50952	14.97				72.1468	15.0801
279061	141.68	1.51061	14.973				72.157	15.091
279261	141.76	1.51148	14.972				72.1978	15.0997
279462	141.72	1.5124	14.971				72.1774	15.1089
279662	141.72	1.5135	14.969				72.1774	15.1199
279863	141.76	1.51438	14.973				72.1978	15.1287
280063	141.8	1.51537	14.972				72.2181	15.1386
280263	141.68	1.51641	14.971				72.157	15.149
280464	141.68	1.51751	14.973				72.157	15.1599
280664	141.78	1.51848	14.969				72.208	15.1696
280866	141.74	1.51939	14.971				72.1876	15.1787
281067	141.66	1.52052	14.971				72.1468	15.19
281267	141.82	1.52156	14.975				72.2283	15.2004
281468	141.76	1.52258	14.973				72.1978	15.2106
281668	141.74	1.52339	14.971				72.1876	15.2187
281868	141.76	1.52458	14.973				72.1978	15.2306
282069	141.8	1.52557	14.971				72.2181	15.2405
282269	141.8	1.52657	14.972				72.2181	15.2504
282469	141.8	1.52747	14.975				72.2181	15.2594
282670	141.76	1.52858	14.969				72.1978	15.2705
282870	141.82	1.52946	14.971				72.2283	15.2793
283071	141.84	1.53046	14.972				72.2385	15.2893
283271	141.76	1.53138	14.972				72.1978	15.2985
283471	141.76	1.53248	14.971				72.1978	15.3095
283672	141.76	1.53358	14.974				72.1978	15.3205
283872	141.76	1.53458	14.974				72.1978	15.3305
284074	141.72	1.5356	14.973				72.1774	15.3407
284275	141.66	1.53662	14.972				72.1468	15.3508
284475	141.8	1.53747	14.972				72.2181	15.3593
284676	141.76	1.53858	14.973				72.1978	15.3704
284876	141.82	1.53946	14.972				72.2283	15.3792
285076	141.7	1.54051	14.973				72.1672	15.3897
285277	141.72	1.5415	14.973				72.1774	15.3996
285477	141.8	1.54257	14.977				72.2181	15.4103
285677	141.76	1.54358	14.969				72.1978	15.4204
285878	141.74	1.54459	14.97				72.1876	15.4305
286078	141.76	1.54558	14.969				72.1978	15.4404
286279	141.68	1.54661	14.97				72.157	15.4506
286479	141.68	1.54751	14.97				72.157	15.4596
286679	141.72	1.5486	14.971				72.1774	15.4705
286880	141.76	1.54948	14.972				72.1978	15.4793
287080	141.8	1.55057	14.974				72.2181	15.4902
287282	141.78	1.55158	14.973				72.208	15.5003
287483	141.68	1.55271	14.975				72.157	15.5116
287683	141.64	1.55363	14.975				72.1367	15.5208
287884	141.46	1.55469	14.971				72.045	15.5314
288084	141.52	1.55577	14.972				72.0755	15.5422
288284	141.56	1.55675	14.972				72.0959	15.5519
288485	141.44	1.5578	14.971				72.0348	15.5624
288685	141.46	1.55889	14.972				72.045	15.5733
288885	141.38	1.55992	14.969				72.0042	15.5836
289086	141.34	1.56093	14.97				71.9839	15.5937
289286	141.32	1.56194	14.968				71.9737	15.6038
289487	141.28	1.56285	14.971				71.9533	15.6129
289687	141.28	1.56405	14.974				71.9533	15.6249
289887	141.2	1.56518	14.977				71.9126	15.6362
290088	141.2	1.56608	14.97				71.9126	15.6452
290288	141.16	1.56709	14.973				71.8922	15.6552
290490	141.06	1.56813	14.974				71.8413	15.6656
290691	141.12	1.56921	14.972				71.8718	15.6764
290891	141.08	1.57022	14.971				71.8515	15.6865
291092	141.06	1.57123	14.972				71.8413	15.6966
291292	141.06	1.57223	14.973				71.8413	15.7066
291492	140.88	1.57329	14.969				71.7496	15.7172
291693	140.94	1.57437	14.969				71.7802	15.728
291893	140.9	1.57529	14.973				71.7598	15.7372
292094	140.9	1.57618	14.972				71.7598	15.7461
292294	140.86	1.5772	14.971				71.7394	15.7562
292494	140.8	1.57812	14.973				71.7089	15.7654
292695	140.84	1.57901	14.973				71.7292	15.7743
292895	140.8	1.57992	14.969				71.7089	15.7834
293095	140.78	1.58103	14.971				71.6987	15.7945
293296	140.74	1.58194	14.976				71.6783	15.8036
293496	140.76	1.58293	14.969				71.6885	15.8135
293697	140.74	1.58404	14.973				71.6783	15.8246
293897	140.78	1.58493	14.973				71.6987	15.8335
294097	140.86	1.5859	14.974				71.7394	15.8432
294298	140.76	1.58683	14.973				71.6885	15.8524
294498	140.84	1.58781	14.972				71.7292	15.8622
294700	140.86	1.5888	14.97				71.7394	15.8721
294901	140.84	1.58971	14.97				71.7292	15.8812
295101	140.82	1.59091	14.972				71.719	15.8932
295302	140.82	1.59191	14.975				71.719	15.9032
295502	140.74	1.59304	14.969				71.6783	15.9145
295702	140.72	1.59395	14.973				71.6681	15.9236
295903	140.76	1.59493	14.971				71.6885	15.9334
296103	140.74	1.59594	14.973				71.6783	15.9435
296303	140.8	1.59692	14.973				71.7089	15.9532
296504	140.68	1.59806	14.973				71.6477	15.9646
296704	140.72	1.59905	14.973				71.6681	15.9745
296905	140.72	1.59995	14.972				71.6681	15.9835
297105	140.86	1.601	14.973				71.7394	15.994
297305	140.72	1.60205	14.976				71.6681	16.0045
297506	140.76	1.60293	14.975				71.6885	16.0133
297706	140.84	1.60401	14.972				71.7292	16.0241
297908	140.8	1.60502	14.973				71.7089	16.0342
298109	140.7	1.60596	14.969				71.6579	16.0436
298309	140.82	1.60691	14.973				71.719	16.053
298510	140.86	1.6079	14.97				71.7394	16.0629
298710	140.84	1.60891	14.971				71.7292	16.073
298910	140.78	1.61013	14.971				71.6987	16.0852
299111	140.7	1.61116	14.972				71.6579	16.0955
299311	140.72	1.61205	14.967				71.6681	16.1044
299511	140.7	1.61305	14.973				71.6579	16.1144
299712	140.68	1.61406	14.973				71.6477	16.1245
299912	140.78	1.61513	14.972				71.6987	16.1352
300113	140.68	1.61606	14.969				71.6477	16.1445
300313	140.76	1.61703	14.971				71.6885	16.1541
300513	140.8	1.61812	14.972				71.7089	16.165
300714	140.74	1.61914	14.971				71.6783	16.1752
300914	140.64	1.62018	14.972				71.6274	16.1856
301116	140.68	1.62106	14.972				71.6477	16.1944
301317	140.64	1.62218	14.971				71.6274	16.2056
301517	140.68	1.62306	14.972				71.6477	16.2144
301718	140.76	1.62393	14.973				71.6885	16.2231
301918	140.62	1.62508	14.971				71.6172	16.2346
302118	140.66	1.62607	14.971				71.6375	16.2445
302319	140.66	1.62717	14.971				71.6375	16.2554
302519	140.66	1.62817	14.974				71.6375	16.2654
302719	140.56	1.6292	14.975				71.5866	16.2757
302920	140.58	1.6302	14.975				71.5968	16.2857
303120	140.6	1.63119	14.969				71.607	16.2956
303321	140.52	1.63212	14.97				71.5662	16.3049
303521	140.44	1.63315	14.971				71.5255	16.3152
303721	140.62	1.63418	14.972				71.6172	16.3255
303922	140.56	1.6351	14.971				71.5866	16.3347
304122	140.54	1.63621	14.973				71.5764	16.3458
304324	140.52	1.63712	14.971				71.5662	16.3548
304525	140.4	1.63806	14.973				71.5051	16.3642
304725	140.56	1.6392	14.971				71.5866	16.3756
304926	140.54	1.64011	14.971				71.5764	16.3847
305126	140.5	1.64112	14.973				71.5561	16.3948
305326	140.42	1.64215	14.973				71.5153	16.4051
305527	140.44	1.64315	14.973				71.5255	16.4151
305727	140.44	1.64425	14.971				71.5255	16.4261
305927	140.36	1.64537	14.971				71.4848	16.4373
306128	140.5	1.64622	14.973				71.5561	16.4458
306328	140.5	1.64723	14.974				71.5561	16.4558
306529	140.32	1.64839	14.971				71.4644	16.4674
306729	140.3	1.64929	14.972				71.4542	16.4764
306929	140.36	1.65037	14.969				71.4848	16.4872
307130	140.28	1.6513	14.969				71.444	16.4965
307330	140.3	1.6524	14.97				71.4542	16.5075
307532	140.26	1.65351	14.97				71.4338	16.5186
307733	140.16	1.65444	14.971				71.3829	16.5279
307933	140.14	1.65555	14.972				71.3727	16.539
308134	140.18	1.65644	14.975				71.3931	16.5479
308334	140.22	1.65732	14.971				71.4135	16.5566
308534	140.24	1.65852	14.971				71.4236	16.5686
308735	140.12	1.65946	14.973				71.3625	16.578
308935	140.08	1.66067	14.973				71.3422	16.5901
309135	140	1.6615	14.973				71.3014	16.5984
309336	140.04	1.66269	14.974				71.3218	16.6103
309536	140.14	1.66345	14.972				71.3727	16.6179
309737	140.06	1.66448	14.973				71.332	16.6282
309937	140.02	1.66549	14.97				71.3116	16.6383
310137	139.98	1.66661	14.97				71.2912	16.6495
310338	139.78	1.66778	14.971				71.1894	16.6611
310538	139.82	1.66876	14.973				71.2097	16.6709
310740	139.7	1.66961	14.97				71.1486	16.6794
310941	139.56	1.67035	14.97				71.0773	16.6868
311141	139.58	1.67115	14.967				71.0875	16.6948
311342	139.56	1.67225	14.97				71.0773	16.7058
311542	139.6	1.67314	14.973				71.0977	16.7147
311742	139.6	1.67424	14.971				71.0977	16.7257
311943	139.56	1.67535	14.974				71.0773	16.7368
312143	139.6	1.67634	14.973				71.0977	16.7467
312344	139.64	1.67743	14.973				71.1181	16.7575
312544	139.74	1.67829	14.974				71.169	16.7661
312744	139.58	1.67965	14.973				71.0875	16.7797
312945	139.6	1.68054	14.971				71.0977	16.7886
313145	139.6	1.68154	14.972				71.0977	16.7986
313345	139.6	1.68264	14.973				71.0977	16.8096
313546	139.58	1.68365	14.974				71.0875	16.8197
313746	139.58	1.68455	14.971				71.0875	16.8287
313947	139.48	1.68558	14.971				71.0366	16.839
314147	139.58	1.68665	14.972				71.0875	16.8497
314347	139.58	1.68765	14.972				71.0875	16.8596
314548	139.54	1.68866	14.973				71.0671	16.8697
314748	139.5	1.68957	14.971				71.0468	16.8788
314950	139.54	1.69046	14.971				71.0671	16.8877
315151	139.5	1.69167	14.969				71.0468	16.8998
315351	139.34	1.69273	14.972				70.9653	16.9104
315552	139.5	1.69367	14.971				71.0468	16.9198
315752	139.46	1.69469	14.969				71.0264	16.93
315952	139.4	1.69571	14.972				70.9958	16.9402
316153	139.36	1.69672	14.972				70.9755	16.9502
316353	139.42	1.6977	14.971				71.006	16.96
316553	139.38	1.69872	14.973				70.9857	16.9702
316754	139.36	1.69972	14.971				70.9755	16.9802
316954	139.28	1.70065	14.973				70.9347	16.9895
317155	139.3	1.70174	14.97				70.9449	17.0004
317355	139.34	1.70273	14.977				70.9653	17.0103
317555	139.36	1.70372	14.974				70.9755	17.0202
317756	139.38	1.70472	14.973				70.9857	17.0302
317956	139.26	1.70576	14.972				70.9245	17.0406
318158	139.36	1.70662	14.97				70.9755	17.0492
318359	139.38	1.70772	14.969				70.9857	17.0601
318559	139.24	1.70877	14.971				70.9143	17.0706
318760	139.26	1.70966	14.973				70.9245	17.0795
318960	139.24	1.71077	14.971				70.9143	17.0906
319160	139.32	1.71174	14.97				70.9551	17.1003
319361	139.12	1.71281	14.97				70.8532	17.111
319561	139.14	1.7139	14.974				70.8634	17.1219
319761	139.18	1.71489	14.975				70.8838	17.1318
319962	139.06	1.71583	14.972				70.8227	17.1412
320162	139.06	1.71683	14.969				70.8227	17.1511
320363	139.1	1.71782	14.975				70.843	17.161
320563	139.04	1.71884	14.975				70.8125	17.1712
320763	138.98	1.71996	14.971				70.7819	17.1824
320964	138.96	1.72106	14.971				70.7717	17.1934
321164	138.96	1.72196	14.975				70.7717	17.2024
321366	138.9	1.72289	14.972				70.7412	17.2117
321567	138.98	1.72376	14.971				70.7819	17.2204
321767	138.98	1.72496	14.973				70.7819	17.2324
321968	138.96	1.72596	14.971				70.7717	17.2424
322168	138.88	1.72699	14.97				70.731	17.2526
322368	138.88	1.72789	14.977				70.731	17.2616
322569	138.92	1.72908	14.971				70.7514	17.2735
322769	138.94	1.72987	14.97				70.7616	17.2814
322969	138.9	1.73079	14.968				70.7412	17.2906
323170	138.96	1.73186	14.973				70.7717	17.3013
323370	138.98	1.73296	14.97				70.7819	17.3123
323571	138.96	1.73406	14.968				70.7717	17.3233
323771	138.98	1.73506	14.971				70.7819	17.3333
323971	139	1.73605	14.97				70.7921	17.3432
324172	138.96	1.73706	14.971				70.7717	17.3532
324372	139	1.73815	14.97				70.7921	17.3641
324574	138.9	1.73909	14.97				70.7412	17.3735
324775	138.92	1.74008	14.969				70.7514	17.3834
324975	138.92	1.74108	14.97				70.7514	17.3934
325176	138.86	1.7421	14.973				70.7208	17.4036
325376	138.82	1.74311	14.973				70.7004	17.4137
325576	138.84	1.74411	14.972				70.7106	17.4237
325777	138.88	1.74499	14.972				70.731	17.4325
325977	138.98	1.74616	14.973				70.7819	17.4442
326177	138.9	1.74708	14.974				70.7412	17.4533
326378	138.86	1.7481	14.972				70.7208	17.4635
326578	138.88	1.74909	14.973				70.731	17.4734
326779	138.88	1.74999	14.973				70.731	17.4824
326979	138.86	1.7512	14.974				70.7208	17.4945
327179	138.78	1.75213	14.973				70.6801	17.5038
327380	138.88	1.75309	14.971				70.731	17.5134
327580	138.76	1.75403	14.971				70.6699	17.5228
327782	138.8	1.75492	14.973				70.6903	17.5317
327983	138.78	1.75593	14.969				70.6801	17.5418
328183	138.66	1.75697	14.973				70.619	17.5521
328384	138.7	1.75786	14.973				70.6393	17.561
328584	138.66	1.75897	14.972				70.619	17.5721
328784	138.6	1.75989	14.971				70.5884	17.5813
328985	138.58	1.761	14.975				70.5782	17.5924
329185	138.66	1.76187	14.973				70.619	17.6011
329385	138.68	1.76286	14.973				70.6291	17.611
329586	138.7	1.76385	14.971				70.6393	17.6209
329786	138.72	1.76495	14.969				70.6495	17.6319
329987	138.7	1.76585	14.973				70.6393	17.6409
330187	138.68	1.76696	14.971				70.6291	17.6519
330387	138.7	1.76795	14.975				70.6393	17.6618
330588	138.72	1.76895	14.973				70.6495	17.6718
330788	138.68	1.76996	14.972				70.6291	17.6819
330990	138.68	1.77096	14.975				70.6291	17.6919
331191	138.72	1.77205	14.97				70.6495	17.7028
331391	138.64	1.77308	14.97				70.6088	17.7131
331592	138.78	1.77393	14.972				70.6801	17.7216
331792	138.76	1.77503	14.97				70.6699	17.7326
331992	138.76	1.77603	14.976				70.6699	17.7426
332193	138.76	1.77693	14.972				70.6699	17.7515
332393	138.64	1.77798	14.97				70.6088	17.762
332594	138.76	1.77903	14.972				70.6699	17.7725
332794	138.62	1.78008	14.975				70.5986	17.783
332994	138.76	1.78103	14.967				70.6699	17.7925
333195	138.68	1.78206	14.971				70.6291	17.8028
333395	138.66	1.78307	14.972				70.619	17.8129
333595	138.58	1.7841	14.971				70.5782	17.8232
333796	138.68	1.78506	14.969				70.6291	17.8328
333996	138.7	1.78605	14.971				70.6393	17.8427
334197	138.68	1.78706	14.971				70.6291	17.8527
334397	138.78	1.78793	14.969				70.6801	17.8614
334597	138.76	1.78903	14.969				70.6699	17.8724
334798	138.76	1.79003	14.968				70.6699	17.8824
334998	138.72	1.79095	14.969				70.6495	17.8916
335200	138.7	1.79206	14.971				70.6393	17.9027
335401	138.66	1.79307	14.97				70.619	17.9128
335601	138.72	1.79405	14.969				70.6495	17.9226
335802	138.68	1.79506	14.974				70.6291	17.9327
336002	138.7	1.79615	14.97				70.6393	17.9436
336202	138.74	1.79714	14.971				70.6597	17.9534
336403	138.7	1.79815	14.971				70.6393	17.9635
336603	138.64	1.79908	14.973				70.6088	17.9728
336803	138.78	1.80003	14.971				70.6801	17.9823
337004	138.8	1.80112	14.973				70.6903	17.9932
337204	138.88	1.80199	14.972				70.731	18.0019
337405	138.74	1.80284	14.973				70.6597	18.0104
337605	138.76	1.80393	14.975				70.6699	18.0213
337805	138.82	1.80481	14.975				70.7004	18.0301
338006	138.76	1.80593	14.971				70.6699	18.0413
338206	138.72	1.80695	14.97				70.6495	18.0514
338408	138.74	1.80794	14.971				70.6597	18.0613
338609	138.82	1.80881	14.971				70.7004	18.07
338809	138.84	1.80991	14.973				70.7106	18.081
339010	138.78	1.81093	14.971				70.6801	18.0912
339210	138.82	1.81191	14.973				70.7004	18.101
339410	138.82	1.81281	14.971				70.7004	18.11
339611	138.8	1.81392	14.972				70.6903	18.1211
339811	138.8	1.81492	14.973				70.6903	18.1311
340011	138.76	1.81583	14.973				70.6699	18.1402
340212	138.7	1.81685	14.971				70.6393	18.1503
340412	138.74	1.81794	14.969				70.6597	18.1612
340613	138.72	1.81895	14.974				70.6495	18.1713
340813	138.76	1.81993	14.974				70.6699	18.1811
341013	138.62	1.82098	14.971				70.5986	18.1916
341214	138.7	1.82195	14.973				70.6393	18.2013
341414	138.74	1.82314	14.973				70.6597	18.2132
341616	138.8	1.82402	14.972				70.6903	18.222
341817	138.9	1.82489	14.971				70.7412	18.2307
342017	138.76	1.82593	14.973				70.6699	18.2411
342218	138.82	1.82701	14.971				70.7004	18.2518
342418	138.78	1.82803	14.97				70.6801	18.262
342618	138.78	1.82903	14.973				70.6801	18.272
342819	138.78	1.82993	14.968				70.6801	18.281
343019	138.82	1.83091	14.968				70.7004	18.2908
343219	138.78	1.83203	14.97				70.6801	18.302
343420	138.72	1.83305	14.973				70.6495	18.3122
343620	138.72	1.83385	14.971				70.6495	18.3202
343821	138.76	1.83503	14.97				70.6699	18.332
344021	138.72	1.83615	14.97				70.6495	18.3432
344221	138.74	1.83704	14.971				70.6597	18.352
344422	138.74	1.83794	14.97				70.6597	18.361
344622	138.82	1.83911	14.971				70.7004	18.3727
344824	138.74	1.84014	14.97				70.6597	18.383
345025	138.74	1.84114	14.972				70.6597	18.393
345225	138.74	1.84204	14.973				70.6597	18.402
345426	138.7	1.84316	14.974				70.6393	18.4132
345626	138.72	1.84395	14.972				70.6495	18.4211
345826	138.68	1.84496	14.972				70.6291	18.4312
346027	138.7	1.84606	14.971				70.6393	18.4422
346227	138.58	1.8471	14.971				70.5782	18.4525
346427	138.62	1.84808	14.972				70.5986	18.4623
346628	138.64	1.84908	14.975				70.6088	18.4723
346828	138.68	1.85006	14.973				70.6291	18.4821
347029	138.8	1.85102	14.972				70.6903	18.4917
347229	138.72	1.85205	14.973				70.6495	18.502
347429	138.72	1.85305	14.973				70.6495	18.512
347630	138.68	1.85416	14.971				70.6291	18.5231
347830	138.6	1.85519	14.973				70.5884	18.5334
348032	138.7	1.85616	14.973				70.6393	18.5431
348233	138.64	1.85708	14.971				70.6088	18.5522
348433	138.6	1.85809	14.973				70.5884	18.5623
348634	138.68	1.85916	14.973				70.6291	18.573
348834	138.74	1.86004	14.972				70.6597	18.5818
349034	138.6	1.86109	14.971				70.5884	18.5923
349235	138.6	1.86219	14.971				70.5884	18.6033
349435	138.68	1.86326	14.973				70.6291	18.614
349635	138.62	1.86428	14.971				70.5986	18.6242
349836	138.64	1.86528	14.973				70.6088	18.6342
350036	138.66	1.86617	14.971				70.619	18.6431
350237	138.64	1.86728	14.972				70.6088	18.6541
350437	138.66	1.86827	14.97				70.619	18.664
350637	138.58	1.8691	14.973				70.5782	18.6723
350838	138.66	1.87007	14.971				70.619	18.682
351038	138.66	1.87117	14.969				70.619	18.693
351240	138.62	1.87228	14.973				70.5986	18.7041
351441	138.58	1.8733	14.971				70.5782	18.7143
351641	138.64	1.87418	14.973				70.6088	18.7231
351842	138.64	1.87528	14.969				70.6088	18.7341
352042	138.58	1.8763	14.973				70.5782	18.7443
352242	138.64	1.87718	14.974				70.6088	18.753
352443	138.56	1.8782	14.97				70.568	18.7632
352643	138.56	1.8793	14.967				70.568	18.7742
352844	138.58	1.8802	14.976				70.5782	18.7832
353044	138.56	1.8812	14.973				70.568	18.7932
353244	138.66	1.88227	14.972				70.619	18.8039
353445	138.62	1.88308	14.97				70.5986	18.812
353645	138.66	1.88427	14.973				70.619	18.8239
353845	138.66	1.88527	14.969				70.619	18.8339
354046	138.64	1.88638	14.969				70.6088	18.845
354246	138.66	1.88737	14.971				70.619	18.8548
354447	138.66	1.88837	14.974				70.619	18.8648
354647	138.7	1.88935	14.971				70.6393	18.8746
354847	138.6	1.89049	14.969				70.5884	18.886
355048	138.6	1.89139	14.97				70.5884	18.895
355248	138.58	1.8925	14.969				70.5782	18.9061
355450	138.72	1.89335	14.972				70.6495	18.9146
355651	138.6	1.89449	14.973				70.5884	18.926
355851	138.62	1.89538	14.972				70.5986	18.9349
356052	138.6	1.89639	14.974				70.5884	18.945
356252	138.64	1.89748	14.971				70.6088	18.9558
356452	138.66	1.89847	14.973				70.619	18.9657
356653	138.64	1.89938	14.971				70.6088	18.9748
356853	138.58	1.9004	14.975				70.5782	18.985
357053	138.58	1.9013	14.971				70.5782	18.994
357254	138.5	1.90233	14.974				70.5375	19.0043
357454	138.56	1.9033	14.975				70.568	19.014
357655	138.52	1.90442	14.973				70.5477	19.0252
357855	138.6	1.90539	14.97				70.5884	19.0349
358055	138.58	1.9063	14.971				70.5782	19.044
358256	138.6	1.90739	14.972				70.5884	19.0548
358456	138.52	1.90842	14.97				70.5477	19.0651
358658	138.54	1.90931	14.973				70.5578	19.074
358859	138.42	1.91035	14.971				70.4967	19.0844
359059	138.5	1.91142	14.974				70.5375	19.0951
359260	138.58	1.9125	14.971				70.5782	19.1059
359460	138.46	1.91344	14.974				70.5171	19.1153
359660	138.54	1.91451	14.973				70.5578	19.126
359861	138.52	1.91552	14.972				70.5477	19.1361
360061	138.44	1.91655	14.969				70.5069	19.1464
360261	138.52	1.91752	14.976				70.5477	19.156
360462	138.54	1.91851	14.973				70.5578	19.1659
360662	138.4	1.91946	14.974				70.4865	19.1754
360863	138.52	1.92042	14.971				70.5477	19.185
361063	138.46	1.92154	14.974				70.5171	19.1962
361263	138.5	1.92252	14.973				70.5375	19.206
361464	138.5	1.92352	14.971				70.5375	19.216
361664	138.48	1.92453	14.975				70.5273	19.2261
361866	138.5	1.92552	14.971				70.5375	19.236
362067	138.5	1.92663	14.971				70.5375	19.2471
362267	138.48	1.92743	14.974				70.5273	19.255
362468	138.54	1.92841	14.972				70.5578	19.2648
362668	138.34	1.92938	14.973				70.456	19.2745
362868	138.4	1.93036	14.97				70.4865	19.2843
363069	138.42	1.93125	14.973				70.4967	19.2932
363269	138.46	1.93224	14.975				70.5171	19.3031
363469	138.4	1.93326	14.971				70.4865	19.3133
363670	138.44	1.93425	14.975				70.5069	19.3232
363870	138.36	1.93537	14.972				70.4662	19.3344
364071	138.38	1.93627	14.969				70.4764	19.3434
364271	138.42	1.93735	14.973				70.4967	19.3541
364471	138.52	1.93832	14.971				70.5477	19.3638
364672	138.4	1.93936	14.973				70.4865	19.3742
364872	138.5	1.94012	14.977				70.5375	19.3818
365074	138.54	1.94121	14.971				70.5578	19.3927
365275	138.36	1.94227	14.971				70.4662	19.4033
365475	138.5	1.94323	14.974				70.5375	19.4129
365676	138.52	1.94432	14.974				70.5477	19.4238
365876	138.58	1.9452	14.974				70.5782	19.4326
366076	138.56	1.9461	14.971				70.568	19.4416
366277	138.54	1.94711	14.975				70.5578	19.4516
366477	138.56	1.9483	14.972				70.568	19.4635
366677	138.52	1.94922	14.971				70.5477	19.4727
366878	138.52	1.95022	14.972				70.5477	19.4827
367078	138.52	1.95132	14.972				70.5477	19.4937
367279	138.56	1.9521	14.97				70.568	19.5015
367479	138.44	1.95335	14.973				70.5069	19.514
367679	138.46	1.95434	14.97				70.5171	19.5239
367880	138.56	1.9554	14.973				70.568	19.5345
368080	138.58	1.9564	14.971				70.5782	19.5445
368282	138.6	1.95729	14.972				70.5884	19.5533
368483	138.6	1.95839	14.975				70.5884	19.5643
368683	138.54	1.95941	14.973				70.5578	19.5745
368884	138.58	1.9604	14.971				70.5782	19.5844
369084	138.6	1.96149	14.973				70.5884	19.5953
369284	138.52	1.96262	14.971				70.5477	19.6066
369485	138.52	1.96352	14.97				70.5477	19.6156
369685	138.58	1.9644	14.974				70.5782	19.6244
369885	138.6	1.96549	14.973				70.5884	19.6353
370086	138.56	1.9664	14.969				70.568	19.6444
370286	138.62	1.96738	14.971				70.5986	19.6541
370487	138.54	1.96841	14.972				70.5578	19.6644
370687	138.5	1.96953	14.974				70.5375	19.6756
370887	138.58	1.9706	14.973				70.5782	19.6863
371088	138.7	1.97145	14.97				70.6393	19.6948
371288	138.54	1.97261	14.97				70.5578	19.7064
371490	138.68	1.97346	14.971				70.6291	19.7149
371691	138.6	1.97449	14.972				70.5884	19.7252
371891	138.62	1.97548	14.973				70.5986	19.7351
372092	138.58	1.9765	14.971				70.5782	19.7453
372292	138.54	1.97751	14.971				70.5578	19.7553
372492	138.48	1.97853	14.972				70.5273	19.7655
372693	138.46	1.97964	14.973				70.5171	19.7766
372893	138.46	1.98044	14.973				70.5171	19.7846
373094	138.6	1.98159	14.97				70.5884	19.7961
373294	138.46	1.98254	14.974				70.5171	19.8056
373494	138.62	1.98358	14.973				70.5986	19.816
373695	138.64	1.98448	14.977				70.6088	19.825
373895	138.58	1.9856	14.974				70.5782	19.8362
374095	138.66	1.98647	14.973				70.619	19.8449
374296	138.6	1.98759	14.974				70.5884	19.856
374496	138.66	1.98847	14.973				70.619	19.8648
374697	138.66	1.98957	14.974				70.619	19.8758
374897	138.56	1.9906	14.971				70.568	19.8861
375097	138.58	1.9916	14.971				70.5782	19.8961
375298	138.72	1.99255	14.971				70.6495	19.9056
375498	138.64	1.99348	14.973				70.6088	19.9149
375700	138.68	1.99466	14.974				70.6291	19.9267
375901	138.7	1.99545	14.971				70.6393	19.9346
376101	138.56	1.9966	14.974				70.568	19.9461
376302	138.62	1.99758	14.973				70.5986	19.9558
376502	138.64	1.99868	14.973				70.6088	19.9668
376702	138.52	1.99962	14.973				70.5477	19.9762
376903	138.62	2.00058	14.971				70.5986	19.9858
377103	138.6	2.00179	14.974				70.5884	19.9979
377303	138.54	2.00271	14.974				70.5578	20.0071
377504	138.48	2.00353	14.974				70.5273	20.0153
377704	138.54	2.00461	14.97				70.5578	20.0261
377905	138.48	2.00553	14.973				70.5273	20.0353
378105	138.54	2.00651	14.973				70.5578	20.0451
378305	138.42	2.00755	14.974				70.4967	20.0554
378506	138.44	2.00855	14.973				70.5069	20.0654
378706	138.54	2.00951	14.973				70.5578	20.075
378908	138.48	2.01053	14.975				70.5273	20.0852
379109	138.54	2.01161	14.971				70.5578	20.096
379309	138.48	2.01263	14.968				70.5273	20.1062
379510	138.62	2.01338	14.971				70.5986	20.1137
379710	138.5	2.01463	14.972				70.5375	20.1262
379910	138.58	2.0156	14.969				70.5782	20.1359
380111	138.6	2.01649	14.971				70.5884	20.1448
380311	138.44	2.01765	14.972				70.5069	20.1563
380511	138.48	2.01853	14.974				70.5273	20.1651
380712	138.48	2.01973	14.972				70.5273	20.1771
380912	138.46	2.02074	14.973				70.5171	20.1872
381113	138.44	2.02165	14.973				70.5069	20.1963
381313	138.58	2.0226	14.971				70.5782	20.2058
381513	138.52	2.02372	14.973				70.5477	20.217
381714	138.5	2.02472	14.972				70.5375	20.227
381914	138.48	2.02563	14.97				70.5273	20.2361
382116	138.54	2.02671	14.972				70.5578	20.2469
382317	138.62	2.02778	14.973				70.5986	20.2575
382517	138.58	2.0288	14.97				70.5782	20.2677
382718	138.64	2.02978	14.973				70.6088	20.2775
382918	138.66	2.03077	14.972				70.619	20.2874
383118	138.56	2.0319	14.974				70.568	20.2987
383319	138.58	2.0328	14.973				70.5782	20.3077
383519	138.54	2.03381	14.972				70.5578	20.3178
383719	138.44	2.03485	14.97				70.5069	20.3282
383920	138.62	2.03568	14.971				70.5986	20.3365
384120	138.48	2.03683	14.973				70.5273	20.348
384321	138.5	2.03772	14.971				70.5375	20.3568
384521	138.56	2.0388	14.972				70.568	20.3676
384721	138.5	2.03973	14.971				70.5375	20.3769
384922	138.6	2.04069	14.97				70.5884	20.3865
385122	138.46	2.04174	14.972				70.5171	20.397
385324	138.5	2.04273	14.972				70.5375	20.4069
385525	138.52	2.04382	14.971				70.5477	20.4178
385725	138.56	2.0447	14.974				70.568	20.4266
385926	138.48	2.04573	14.973				70.5273	20.4369
386126	138.6	2.04669	14.972				70.5884	20.4465
386326	138.6	2.04769	14.973				70.5884	20.4564
386527	138.56	2.0488	14.973				70.568	20.4675
386727	138.6	2.04969	14.974				70.5884	20.4764
386927	138.42	2.05075	14.973				70.4967	20.487
387128	138.54	2.05171	14.972				70.5578	20.4966
387328	138.54	2.05271	14.971				70.5578	20.5066
387529	138.56	2.0537	14.973				70.568	20.5165
387729	138.6	2.05469	14.974				70.5884	20.5264
387929	138.52	2.05582	14.973				70.5477	20.5377
388130	138.62	2.05668	14.973				70.5986	20.5463
388330	138.62	2.05768	14.974				70.5986	20.5562
388532	138.58	2.0587	14.972				70.5782	20.5664
388733	138.6	2.05979	14.971				70.5884	20.5773
388933	138.6	2.06079	14.97				70.5884	20.5873
389134	138.46	2.06174	14.97				70.5171	20.5968
389334	138.52	2.06262	14.969				70.5477	20.6056
389534	138.52	2.06372	14.969				70.5477	20.6166
389735	138.38	2.06487	14.972				70.4764	20.6281
389935	138.42	2.06595	14.973				70.4967	20.6389
390135	138.42	2.06685	14.971				70.4967	20.6479
390336	138.38	2.06767	14.971				70.4764	20.656
390536	138.34	2.06858	14.97				70.456	20.6651
390737	138.44	2.06945	14.969				70.5069	20.6738
390937	138.32	2.07039	14.97				70.4458	20.6832
391137	138.32	2.07139	14.97				70.4458	20.6932
391338	138.38	2.07237	14.973				70.4764	20.703
391538	138.3	2.0734	14.972				70.4356	20.7133
391740	138.4	2.07436	14.972				70.4865	20.7229
391941	138.4	2.07546	14.971				70.4865	20.7339
392141	138.46	2.07654	14.971				70.5171	20.7447
392342	138.44	2.07765	14.975				70.5069	20.7557
392542	138.48	2.07853	14.975				70.5273	20.7645
392742	138.38	2.07977	14.972				70.4764	20.7769
392943	138.48	2.08063	14.973				70.5273	20.7855
393143	138.42	2.08175	14.971				70.4967	20.7967
393344	138.5	2.08262	14.968				70.5375	20.8054
393544	138.48	2.08353	14.973				70.5273	20.8145
393744	138.46	2.08464	14.971				70.5171	20.8256
393945	138.5	2.08562	14.97				70.5375	20.8354
394145	138.48	2.08663	14.971				70.5273	20.8455
394345	138.5	2.08772	14.973				70.5375	20.8563
394546	138.4	2.08866	14.973				70.4865	20.8657
394746	138.44	2.08965	14.973				70.5069	20.8756
394947	138.52	2.09082	14.974				70.5477	20.8873
395147	138.38	2.09177	14.973				70.4764	20.8968
395347	138.46	2.09274	14.972				70.5171	20.9065
395548	138.6	2.09359	14.97				70.5884	20.915
395748	138.5	2.09462	14.969				70.5375	20.9253
395950	138.5	2.09582	14.971				70.5375	20.9373
396151	138.56	2.0966	14.977				70.568	20.9451
396351	138.52	2.09772	14.973				70.5477	20.9562
396552	138.48	2.09873	14.976				70.5273	20.9663
396752	138.48	2.09973	14.975				70.5273	20.9763
396952	138.48	2.10083	14.971				70.5273	20.9873
397153	138.48	2.10163	14.969				70.5273	20.9953
397353	138.42	2.10275	14.973				70.4967	21.0065
397553	138.42	2.10365	14.973				70.4967	21.0155
397754	138.42	2.10465	14.973				70.4967	21.0255
397954	138.46	2.10564	14.969				70.5171	21.0354
398155	138.38	2.10657	14.971				70.4764	21.0447
398355	138.36	2.10757	14.971				70.4662	21.0546
398555	138.38	2.10867	14.973				70.4764	21.0656
398756	138.38	2.10957	14.973				70.4764	21.0746
398956	138.46	2.11064	14.973				70.5171	21.0853
399158	138.42	2.11165	14.971				70.4967	21.0954
[truncated: 567 more rows]

## Sheet: F-8
Force (large)	--	journey	) Results Report
17:21:53,06/23/2019
Diameter: 50.0	mm	Height: 100.2	mm
Vertical force transducer (Test piece vertical force)
Control mode: force/confining pressure	Waveform: Slope
KN/s	Force the finish: 5.720	KN	Confining pressure rate :0.500	MPa/s	End point of confining pressure :2.9610	MPa
Time (ms)	Vertical force (KN)	Vertical deformation (mm)	Confining pressure (MPa)				stress	axial strain
0	0	0	0				0	0
200	0	-0.0002	0.002				0	-0.00199601
401	0.1	-0.00024	0.003				0.0509296	-0.00239521
601	0.16	-0.00016	0.006				0.0814873	-0.00159681
801	0.54	0.00011	0.013				0.27502	0.0010978
1003	0.58	0.0003	0.019				0.295392	0.00299401
1204	0.72	0.00095	0.026				0.366693	0.00948104
1404	0.94	0.00467	0.036				0.478738	0.0466068
1605	1.18	0.00929	0.059				0.600969	0.0927146
1805	1.44	0.0163	0.085				0.733386	0.162675
2005	1.62	0.02313	0.126				0.825059	0.230838
2206	1.9	0.02993	0.178				0.967662	0.298703
2406	2.06	0.03648	0.261				1.04915	0.364072
2607	2.34	0.04298	0.352				1.19175	0.428942
2807	2.58	0.0491	0.438				1.31398	0.49002
3007	2.86	0.0544	0.51				1.45659	0.542914
3208	3.16	0.05909	0.573				1.60937	0.589721
3408	3.06	0.06123	0.638				1.55845	0.611078
3609	3.22	0.06287	0.721				1.63993	0.627445
3809	3.36	0.06502	0.848				1.71123	0.648902
4009	3.66	0.06732	1.081				1.86402	0.671856
4211	3.96	0.06961	1.523				2.01681	0.694711
4412	4.14	0.07185	1.895				2.10848	0.717066
4612	4.42	0.07445	1.994				2.25109	0.743014
4813	4.72	0.07665	2.302				2.40388	0.76497
5013	4.82	0.07811	2.507				2.45481	0.779541
5213	4.8	0.07922	2.565				2.44462	0.790619
5414	4.94	0.08047	2.659				2.51592	0.803094
5614	5.28	0.08285	2.765				2.68908	0.826846
5815	5.54	0.08586	2.862				2.8215	0.856886
6015	5.72	0.0887	2.961				2.91317	0.88523
6151	5.98	0.09081	3.017				3.04559	0.906287
6185	5.96	0.09101	3.013				3.0354	0.908283
6385	5.96	0.09101	3.013				3.0354	0.908283
6585	6.04	0.09269	2.989				3.07615	0.92505
6785	5.64	0.09403	2.994				2.87243	0.938423
6985	6.12	0.09466	2.994				3.11689	0.944711
7185	6.16	0.09624	2.991				3.13726	0.960479
7385	6.22	0.09652	2.993				3.16782	0.963273
7585	6.4	0.09766	2.992				3.25949	0.974651
7785	6.44	0.09895	2.993				3.27987	0.987525
7985	6.52	0.09982	2.991				3.32061	0.996208
8185	6.6	0.10039	2.994				3.36135	1.0019
8385	6.74	0.10134	2.991				3.43265	1.01138
8585	6.82	0.10241	2.99				3.4734	1.02206
8785	6.92	0.10348	2.993				3.52433	1.03273
8985	6.98	0.10446	2.995				3.55488	1.04251
9185	7	0.10545	2.991				3.56507	1.0524
9385	7.18	0.10639	2.991				3.65674	1.06178
9585	7.22	0.10727	2.993				3.67712	1.07056
9785	7.3	0.10834	2.994				3.71786	1.08124
9985	7.46	0.10919	2.992				3.79935	1.08972
10185	7.5	0.11017	2.99				3.81972	1.0995
10385	7.54	0.11106	2.993				3.84009	1.10838
10585	7.64	0.11213	2.991				3.89102	1.11906
10785	7.82	0.11316	2.992				3.98269	1.12934
10985	7.84	0.11416	2.989				3.99288	1.13932
11185	7.92	0.11513	2.99				4.03362	1.149
11385	8.06	0.11618	2.992				4.10492	1.15948
11585	8.24	0.11722	2.992				4.1966	1.16986
11785	8.28	0.1181	2.992				4.21697	1.17864
11985	8.36	0.11897	2.992				4.25771	1.18733
12185	8.54	0.11991	2.993				4.34939	1.19671
12385	8.52	0.12082	2.993				4.3392	1.20579
12585	8.72	0.12175	2.989				4.44106	1.21507
12785	8.84	0.12281	2.99				4.50218	1.22565
12985	8.8	0.12382	2.991				4.4818	1.23573
13185	9	0.12465	2.991				4.58366	1.24401
13385	9.12	0.12551	2.989				4.64478	1.25259
13585	9.22	0.12657	2.989				4.69571	1.26317
13785	9.36	0.12752	2.989				4.76701	1.27265
13985	9.48	0.12858	2.989				4.82812	1.28323
14185	9.62	0.12953	2.991				4.89943	1.29271
14385	9.68	0.13051	2.991				4.92998	1.3025
14585	9.8	0.13167	2.992				4.9911	1.31407
14785	9.82	0.13256	2.991				5.00128	1.32295
14985	9.96	0.13341	2.99				5.07259	1.33144
15185	10	0.1345	2.992				5.09296	1.34232
15385	10.22	0.13532	2.991				5.205	1.3505
15585	10.3	0.13629	2.991				5.24575	1.36018
15785	10.46	0.13714	2.99				5.32723	1.36866
15985	10.38	0.13817	2.99				5.28649	1.37894
16185	10.58	0.1391	2.99				5.38835	1.38822
16385	10.7	0.14015	2.99				5.44947	1.3987
16585	10.8	0.14112	2.992				5.50039	1.40838
16785	10.92	0.14198	2.989				5.56151	1.41697
16985	11.06	0.14283	2.989				5.63281	1.42545
17185	11.24	0.14397	2.991				5.72448	1.43683
17385	11.36	0.14492	2.993				5.7856	1.44631
17585	11.4	0.14591	2.99				5.80597	1.45619
17785	11.56	0.14695	2.992				5.88746	1.46657
17985	11.62	0.14803	2.989				5.91802	1.47735
18185	11.72	0.149	2.989				5.96895	1.48703
18385	11.8	0.14997	2.991				6.00969	1.49671
18585	12.06	0.15098	2.992				6.14211	1.50679
18785	12.22	0.15182	2.991				6.22359	1.51517
18985	12.26	0.15281	2.987				6.24397	1.52505
19185	12.36	0.15377	2.99				6.2949	1.53463
19385	12.52	0.15462	2.992				6.37638	1.54311
19585	12.58	0.1556	2.99				6.40694	1.55289
19785	12.66	0.15657	2.989				6.44769	1.56257
19985	12.72	0.15745	2.99				6.47824	1.57136
20185	12.84	0.15841	2.989				6.53936	1.58094
20385	13	0.15935	2.993				6.62085	1.59032
20585	13.04	0.16044	2.993				6.64122	1.6012
20785	13.22	0.16127	2.99				6.73289	1.60948
20985	13.36	0.16222	2.99				6.80419	1.61896
21185	13.46	0.16329	2.99				6.85512	1.62964
21385	13.54	0.16426	2.99				6.89587	1.63932
21585	13.78	0.16518	2.991				7.0181	1.6485
21785	13.84	0.16616	2.991				7.04865	1.65828
21985	14.02	0.16709	2.99				7.14033	1.66756
22185	13.98	0.16811	2.99				7.11996	1.67774
22385	14.1	0.16906	2.991				7.18107	1.68723
22585	14.2	0.16993	2.99				7.232	1.69591
22785	14.46	0.17094	2.987				7.36442	1.70599
22985	14.52	0.17172	2.991				7.39498	1.71377
23185	14.66	0.17267	2.993				7.46628	1.72325
23385	14.86	0.1738	2.991				7.56814	1.73453
23585	14.98	0.17476	2.988				7.62925	1.74411
23785	15.12	0.17551	2.991				7.70055	1.7516
23985	15.16	0.17659	2.989				7.72092	1.76238
24185	15.38	0.17752	2.99				7.83297	1.77166
24385	15.48	0.17848	2.989				7.8839	1.78124
24585	15.64	0.17943	2.991				7.96539	1.79072
24785	15.86	0.18015	2.988				8.07743	1.7979
24985	15.98	0.18121	2.991				8.13855	1.80848
25185	16.12	0.18206	2.989				8.20985	1.81697
25385	16.24	0.18312	2.99				8.27096	1.82754
25585	16.4	0.18406	2.991				8.35245	1.83693
25785	16.62	0.18518	2.99				8.4645	1.8481
25985	16.76	0.18623	2.988				8.5358	1.85858
26185	16.98	0.18706	2.992				8.64784	1.86687
26385	16.96	0.18806	2.989				8.63766	1.87685
26585	17.14	0.189	2.988				8.72933	1.88623
26785	17.24	0.18997	2.991				8.78026	1.89591
26985	17.48	0.19088	2.99				8.90249	1.90499
27185	17.54	0.19186	2.99				8.93305	1.91477
27385	17.58	0.19275	2.993				8.95342	1.92365
27585	17.7	0.1936	2.99				9.01454	1.93214
27785	17.92	0.19453	2.989				9.12658	1.94142
27985	18.04	0.19549	2.992				9.1877	1.951
28185	18.22	0.19642	2.99				9.27937	1.96028
28385	18.36	0.19737	2.99				9.35067	1.96976
28585	18.5	0.19832	2.992				9.42197	1.97924
28785	18.64	0.19938	2.988				9.49327	1.98982
28985	18.88	0.20039	2.988				9.61551	1.9999
29185	19	0.20125	2.991				9.67662	2.00848
29385	19.18	0.20229	2.991				9.76829	2.01886
29585	19.36	0.20322	2.989				9.85997	2.02814
29785	19.48	0.20418	2.99				9.92108	2.03772
29985	19.62	0.20513	2.992				9.99238	2.04721
30185	19.72	0.206	2.994				10.0433	2.05589
30385	19.84	0.20686	2.991				10.1044	2.06447
30585	20.04	0.20779	2.99				10.2063	2.07375
30785	20.14	0.20885	2.99				10.2572	2.08433
30985	20.3	0.20969	2.99				10.3387	2.09271
31185	20.38	0.21077	2.992				10.3794	2.10349
31385	20.58	0.2117	2.991				10.4813	2.11277
31585	20.68	0.21256	2.991				10.5322	2.12136
31785	20.92	0.21358	2.992				10.6545	2.13154
31985	21.1	0.21451	2.989				10.7461	2.14082
32185	21.14	0.2154	2.993				10.7665	2.1497
32385	21.38	0.21632	2.99				10.8887	2.15888
32585	21.42	0.2173	2.99				10.9091	2.16866
32785	21.54	0.21836	2.989				10.9702	2.17924
32985	21.74	0.21919	2.988				11.0721	2.18752
33185	21.92	0.22013	2.989				11.1638	2.19691
33385	22.02	0.22119	2.991				11.2147	2.20749
33585	22.14	0.22225	2.988				11.2758	2.21806
33785	22.32	0.22319	2.992				11.3675	2.22745
33985	22.58	0.2241	2.991				11.4999	2.23653
34185	22.68	0.22506	2.993				11.5508	2.24611
34385	22.82	0.22581	2.989				11.6221	2.25359
34585	22.92	0.22698	2.991				11.6731	2.26527
34785	23.06	0.22783	2.993				11.7444	2.27375
34985	23.16	0.22879	2.992				11.7953	2.28333
35185	23.38	0.22972	2.992				11.9073	2.29261
35385	23.56	0.23055	2.992				11.999	2.3009
35585	23.7	0.2316	2.989				12.0703	2.31138
35785	23.82	0.23266	2.991				12.1314	2.32196
35985	24.02	0.23349	2.994				12.2333	2.33024
36185	24.22	0.23442	2.988				12.3351	2.33952
36385	24.26	0.23531	2.991				12.3555	2.3484
36585	24.54	0.23631	2.992				12.4981	2.35838
36785	24.64	0.23718	2.991				12.549	2.36707
36985	24.82	0.23821	2.99				12.6407	2.37735
37185	25.04	0.23914	2.994				12.7528	2.38663
37385	25.22	0.24017	2.991				12.8444	2.39691
37585	25.26	0.24126	2.992				12.8648	2.40778
37785	25.52	0.24217	2.988				12.9972	2.41687
37985	25.64	0.24313	2.99				13.0583	2.42645
38185	25.8	0.24397	2.992				13.1398	2.43483
38385	25.96	0.24501	2.992				13.2213	2.44521
38585	26.04	0.24589	2.993				13.2621	2.45399
38785	26.08	0.24687	2.989				13.2824	2.46377
38985	26.32	0.24779	2.99				13.4047	2.47295
39185	26.4	0.24866	2.994				13.4454	2.48164
39385	26.64	0.24958	2.989				13.5676	2.49082
39585	26.7	0.25035	2.992				13.5982	2.4985
39785	26.94	0.25137	2.991				13.7204	2.50868
39985	27.14	0.2523	2.991				13.8223	2.51796
40185	27.32	0.25354	2.995				13.914	2.53034
40385	27.5	0.25447	2.992				14.0056	2.53962
40585	27.68	0.25551	2.99				14.0973	2.55
40785	27.8	0.25657	2.991				14.1584	2.56058
40985	28	0.2575	2.992				14.2603	2.56986
41185	28.18	0.25844	2.987				14.352	2.57924
41385	28.36	0.25937	2.996				14.4436	2.58852
41585	28.46	0.26024	2.99				14.4946	2.59721
41785	28.64	0.26118	2.991				14.5862	2.60659
41985	28.74	0.26214	2.991				14.6372	2.61617
42185	28.88	0.26299	2.99				14.7085	2.62465
42385	29.06	0.26383	2.993				14.8001	2.63303
42585	29.16	0.26469	2.993				14.8511	2.64162
42785	29.28	0.26565	2.989				14.9122	2.6512
42985	29.52	0.26657	2.992				15.0344	2.66038
43185	29.74	0.26729	2.991				15.1465	2.66756
43385	29.72	0.2683	2.992				15.1363	2.67764
43585	29.92	0.26923	2.991				15.2381	2.68693
43785	30.08	0.27027	2.991				15.3196	2.69731
43985	30.26	0.27121	2.992				15.4113	2.70669
44185	30.48	0.27203	2.994				15.5233	2.71487
44385	30.68	0.27296	2.991				15.6252	2.72415
44585	30.84	0.27411	2.99				15.7067	2.73563
44785	31.08	0.27502	2.991				15.8289	2.74471
44985	31.2	0.27598	2.988				15.89	2.75429
45185	31.24	0.27707	2.989				15.9104	2.76517
45385	31.38	0.27802	2.992				15.9817	2.77465
45585	31.68	0.27881	2.993				16.1345	2.78253
45785	31.8	0.27977	2.991				16.1956	2.79212
45985	31.98	0.28061	2.994				16.2873	2.8005
46185	32.02	0.28169	2.993				16.3077	2.81128
46385	32.28	0.2825	2.992				16.4401	2.81936
46585	32.5	0.28332	2.992				16.5521	2.82754
46785	32.6	0.28429	2.993				16.603	2.83723
46985	32.84	0.28551	2.991				16.7253	2.8494
47185	33.02	0.28654	2.989				16.8169	2.85968
47385	33.16	0.28749	2.992				16.8882	2.86916
47585	33.22	0.28867	2.992				16.9188	2.88094
47785	33.44	0.2894	2.993				17.0309	2.88822
47985	33.58	0.29035	2.992				17.1022	2.8977
48185	33.7	0.2913	2.989				17.1633	2.90719
48385	33.9	0.29213	2.991				17.2651	2.91547
48585	34.06	0.29308	2.992				17.3466	2.92495
48785	34.26	0.29411	2.993				17.4485	2.93523
48985	34.2	0.29503	2.991				17.4179	2.94441
49185	34.44	0.29595	2.991				17.5401	2.95359
49385	34.56	0.2969	2.992				17.6013	2.96307
49585	34.78	0.29763	2.99				17.7133	2.97036
49785	34.98	0.29856	2.99				17.8152	2.97964
49985	35.2	0.29948	2.993				17.9272	2.98882
50185	35.2	0.30048	2.994				17.9272	2.9988
50385	35.4	0.30121	2.993				18.0291	3.00609
50585	35.58	0.30215	2.987				18.1207	3.01547
50785	35.8	0.30307	2.993				18.2328	3.02465
50985	35.92	0.30413	2.991				18.2939	3.03523
51185	36.2	0.30513	2.99				18.4365	3.04521
51385	36.32	0.30609	2.992				18.4976	3.05479
51585	36.48	0.30713	2.991				18.5791	3.06517
51785	36.7	0.30815	2.991				18.6912	3.07535
51985	36.86	0.3089	2.991				18.7726	3.08283
52185	37.08	0.31002	2.993				18.8847	3.09401
52385	37.14	0.3108	2.991				18.9152	3.1018
52585	37.3	0.31174	2.99				18.9967	3.11118
52785	37.44	0.3127	2.989				19.068	3.12076
52985	37.56	0.31365	2.992				19.1292	3.13024
53185	37.68	0.31461	2.991				19.1903	3.13982
53385	37.82	0.31546	2.998				19.2616	3.1483
53585	38.04	0.31629	2.986				19.3736	3.15659
53785	38.18	0.31724	2.992				19.4449	3.16607
53985	38.28	0.3182	2.991				19.4958	3.17565
54185	38.52	0.31912	2.993				19.6181	3.18483
54385	38.68	0.32006	2.993				19.6996	3.19421
54585	38.76	0.32103	2.991				19.7403	3.20389
54785	38.94	0.32197	2.992				19.832	3.21327
54985	39.1	0.32311	2.991				19.9135	3.22465
55185	39.34	0.32413	2.99				20.0357	3.23483
55385	39.5	0.32497	2.994				20.1172	3.24321
55585	39.64	0.32603	2.993				20.1885	3.25379
55785	39.84	0.32696	2.992				20.2903	3.26307
55985	39.92	0.32803	2.99				20.3311	3.27375
56185	40.12	0.32876	2.988				20.4329	3.28104
56385	40.26	0.32971	2.992				20.5042	3.29052
56585	40.44	0.33065	2.99				20.5959	3.2999
56785	40.62	0.33148	2.992				20.6876	3.30818
56985	40.72	0.33255	2.99				20.7385	3.31886
57185	40.82	0.33351	2.99				20.7895	3.32844
57385	41.02	0.33444	2.987				20.8913	3.33772
57585	41.2	0.33518	2.991				20.983	3.34511
57785	41.3	0.33614	2.991				21.0339	3.35469
57985	41.54	0.33706	2.991				21.1561	3.36387
58185	41.72	0.338	2.994				21.2478	3.37325
58385	41.9	0.33903	2.989				21.3395	3.38353
58585	42.12	0.33986	2.99				21.4515	3.39182
58785	42.36	0.34077	2.991				21.5738	3.4009
58985	42.42	0.34185	2.993				21.6043	3.41168
59185	42.6	0.34289	2.989				21.696	3.42206
59385	42.78	0.34383	2.994				21.7877	3.43144
59585	42.86	0.3448	2.989				21.8284	3.44112
59785	43.02	0.34564	2.989				21.9099	3.4495
59985	43.18	0.34659	2.996				21.9914	3.45898
60185	43.38	0.34742	2.989				22.0933	3.46727
60385	43.46	0.34839	2.99				22.134	3.47695
60585	43.6	0.34934	2.989				22.2053	3.48643
60785	43.68	0.35031	2.988				22.246	3.49611
60985	43.92	0.35103	2.989				22.3683	3.50329
61185	44.14	0.35225	2.991				22.4803	3.51547
61385	44.4	0.35326	2.993				22.6127	3.52555
61585	44.5	0.35432	2.991				22.6637	3.53613
61785	44.66	0.35527	2.991				22.7452	3.54561
61985	44.96	0.35616	2.992				22.8979	3.55449
62185	45.04	0.35714	2.992				22.9387	3.56427
62385	45.22	0.35807	2.989				23.0304	3.57355
62585	45.42	0.3589	2.99				23.1322	3.58184
62785	45.3	0.36014	2.989				23.0711	3.59421
62985	45.66	0.36092	2.993				23.2544	3.602
63185	45.78	0.36188	2.988				23.3156	3.61158
63385	45.94	0.36272	2.991				23.397	3.61996
63585	46.02	0.36349	2.992				23.4378	3.62764
63785	46.18	0.36434	2.989				23.5193	3.63613
63985	46.38	0.36537	2.992				23.6211	3.64641
64185	46.5	0.36622	2.987				23.6823	3.65489
64385	46.74	0.36724	2.989				23.8045	3.66507
64585	46.96	0.36816	2.991				23.9165	3.67425
64785	47.12	0.36931	2.989				23.998	3.68573
64985	47.14	0.3703	2.991				24.0082	3.69561
65185	47.36	0.37122	2.991				24.1202	3.70479
65385	47.58	0.37215	2.991				24.2323	3.71407
65585	47.82	0.37296	2.987				24.3545	3.72216
65785	47.84	0.37396	2.99				24.3647	3.73214
65985	48.02	0.37479	2.991				24.4564	3.74042
66185	48.22	0.37582	2.989				24.5582	3.7507
66385	48.34	0.37658	2.988				24.6194	3.75828
66585	48.4	0.37756	2.991				24.6499	3.76806
66785	48.68	0.37846	2.988				24.7925	3.77705
66985	48.86	0.3796	2.988				24.8842	3.78842
67185	48.96	0.38046	2.99				24.9351	3.79701
67385	49.18	0.38149	2.99				25.0472	3.80729
67585	49.38	0.38232	2.99				25.149	3.81557
67785	49.46	0.38339	2.99				25.1898	3.82625
67985	49.62	0.38423	2.99				25.2713	3.83463
68185	49.78	0.38528	2.991				25.3527	3.84511
68385	49.94	0.38622	2.993				25.4342	3.85449
68585	50.14	0.38715	2.993				25.5361	3.86377
68785	50.44	0.38805	2.991				25.6889	3.87275
68985	50.62	0.38898	2.989				25.7806	3.88204
69185	50.66	0.38997	2.99				25.8009	3.89192
69385	50.7	0.39095	2.992				25.8213	3.9017
69585	50.82	0.39201	2.989				25.8824	3.91228
69785	51.02	0.39284	2.992				25.9843	3.92056
69985	51.1	0.39381	2.988				26.025	3.93024
70185	51.26	0.39466	2.991				26.1065	3.93872
70385	51.5	0.39557	2.993				26.2287	3.9478
70585	51.66	0.39652	2.991				26.3102	3.95729
70785	51.8	0.39737	2.988				26.3815	3.96577
70985	51.88	0.39844	2.99				26.4223	3.97645
71185	52.14	0.39935	2.991				26.5547	3.98553
71385	52.28	0.4003	2.992				26.626	3.99501
71585	52.46	0.40124	2.99				26.7177	4.00439
71785	52.68	0.40216	2.991				26.8297	4.01357
71985	52.86	0.403	2.992				26.9214	4.02196
72185	52.98	0.40406	2.991				26.9825	4.03253
72385	53.14	0.4049	2.99				27.064	4.04092
72585	53.22	0.40587	2.993				27.1047	4.0506
72785	53.44	0.4068	2.993				27.2168	4.05988
72985	53.54	0.40776	2.991				27.2677	4.06946
73185	53.74	0.40869	2.99				27.3696	4.07874
73385	53.98	0.40961	2.992				27.4918	4.08792
73585	54.08	0.41057	2.99				27.5427	4.0975
73785	54.22	0.41152	2.992				27.614	4.10699
73985	54.4	0.41246	2.994				27.7057	4.11637
74185	54.52	0.41342	2.986				27.7668	4.12595
74385	54.7	0.41435	2.989				27.8585	4.13523
74585	54.84	0.41531	2.992				27.9298	4.14481
74785	54.96	0.41636	2.992				27.9909	4.15529
74985	55.2	0.41718	2.987				28.1131	4.16347
75185	55.34	0.41813	2.992				28.1844	4.17295
75385	55.48	0.41908	2.991				28.2557	4.18244
75585	55.66	0.42002	2.992				28.3474	4.19182
75785	55.9	0.42093	2.993				28.4696	4.2009
75985	55.92	0.42193	2.99				28.4798	4.21088
76185	56.12	0.42286	2.991				28.5817	4.22016
76385	56.38	0.42387	2.99				28.7141	4.23024
76585	56.36	0.42487	2.991				28.7039	4.24022
76785	56.58	0.4257	2.991				28.816	4.2485
76985	56.74	0.42664	2.993				28.8974	4.25788
77185	56.92	0.42758	2.989				28.9891	4.26727
77385	56.92	0.42848	2.993				28.9891	4.27625
77585	57.16	0.42939	2.993				29.1113	4.28533
77785	57.22	0.43047	2.991				29.1419	4.29611
77985	57.5	0.43127	2.991				29.2845	4.30409
78185	57.6	0.43234	2.989				29.3354	4.31477
78385	57.66	0.43312	2.992				29.366	4.32255
78585	57.92	0.43423	2.989				29.4984	4.33363
78785	58	0.4351	2.991				29.5392	4.34232
78985	58.22	0.43602	2.991				29.6512	4.3515
79185	58.32	0.43709	2.992				29.7021	4.36218
79385	58.58	0.4381	2.989				29.8345	4.37226
79585	58.68	0.43906	2.988				29.8855	4.38184
79785	58.9	0.43998	2.99				29.9975	4.39102
79985	59.02	0.44104	2.99				30.0586	4.4016
80185	59.2	0.44198	2.99				30.1503	4.41098
80385	59.3	0.44284	2.987				30.2012	4.41956
80585	59.52	0.44377	2.993				30.3133	4.42884
80785	59.56	0.44465	2.993				30.3337	4.43762
80985	59.7	0.4456	2.992				30.405	4.44711
81185	59.92	0.44653	2.989				30.517	4.45639
81385	60.06	0.44738	2.99				30.5883	4.46487
81585	60.12	0.44836	2.993				30.6189	4.47465
81785	60.26	0.44921	2.992				30.6902	4.48313
81985	60.44	0.45015	2.993				30.7818	4.49251
82185	60.54	0.45111	2.988				30.8328	4.5021
82385	60.86	0.452	2.994				30.9957	4.51098
82585	60.98	0.45306	2.993				31.0569	4.52156
82785	61.12	0.45411	2.995				31.1282	4.53204
82985	61.3	0.45504	2.991				31.2198	4.54132
83185	61.5	0.45607	2.992				31.3217	4.5516
83385	61.64	0.45693	2.99				31.393	4.56018
83585	61.84	0.45796	2.991				31.4949	4.57046
83785	62	0.4588	2.993				31.5763	4.57884
83985	62.16	0.45984	2.991				31.6578	4.58922
84185	62.16	0.46074	2.988				31.6578	4.5982
84385	62.42	0.46165	2.991				31.7902	4.60729
84585	62.64	0.46258	2.991				31.9023	4.61657
84785	62.68	0.46356	2.991				31.9227	4.62635
84985	62.9	0.46438	2.993				32.0347	4.63453
85185	62.82	0.46541	2.992				31.994	4.64481
85385	63.08	0.46632	2.989				32.1264	4.65389
85585	63.36	0.46712	2.991				32.269	4.66188
85785	63.48	0.46818	2.99				32.3301	4.67246
85985	63.58	0.46915	2.989				32.381	4.68214
86185	63.76	0.47008	2.995				32.4727	4.69142
86385	63.88	0.47104	2.989				32.5338	4.701
86585	64.02	0.47189	2.988				32.6051	4.70948
86785	64.14	0.47285	2.994				32.6662	4.71906
86985	64.42	0.47385	2.99				32.8088	4.72904
87185	64.66	0.47467	2.993				32.9311	4.73723
87385	64.78	0.47593	2.991				32.9922	4.7498
87585	64.82	0.47691	2.993				33.0126	4.75958
87785	65.08	0.47782	2.988				33.145	4.76866
87985	65.12	0.47891	2.993				33.1653	4.77954
88185	65.32	0.47974	2.993				33.2672	4.78782
88385	65.38	0.48062	2.992				33.2978	4.79661
88585	65.54	0.48166	2.991				33.3792	4.80699
88785	65.64	0.48253	2.992				33.4302	4.81567
88985	65.82	0.48336	2.992				33.5219	4.82395
89185	65.96	0.48431	2.992				33.5932	4.83343
89385	66.1	0.48516	2.991				33.6645	4.84192
89585	66.34	0.48608	2.993				33.7867	4.8511
89785	66.48	0.48713	2.989				33.858	4.86158
89985	66.52	0.48832	2.992				33.8784	4.87345
90185	66.68	0.48906	2.992				33.9598	4.88084
90385	66.78	0.49003	2.992				34.0108	4.89052
90585	66.94	0.49097	2.994				34.0923	4.8999
90785	67.2	0.49198	2.992				34.2247	4.90998
90985	67.18	0.49289	2.989				34.2145	4.91906
91185	67.28	0.49375	2.991				34.2654	4.92764
91385	67.5	0.49477	2.992				34.3775	4.93782
91585	67.62	0.49583	2.992				34.4386	4.9484
91785	67.76	0.49668	2.992				34.5099	4.95689
91985	67.88	0.49764	2.992				34.571	4.96647
92185	68.04	0.49859	2.99				34.6525	4.97595
92385	68.24	0.49952	2.995				34.7543	4.98523
92585	68.38	0.50037	2.989				34.8256	4.99371
92785	68.52	0.50142	2.995				34.8969	5.00419
92985	68.72	0.50245	2.993				34.9988	5.01447
93185	68.86	0.5033	2.989				35.0701	5.02295
93385	69	0.50435	2.993				35.1414	5.03343
93585	69.12	0.50521	2.993				35.2025	5.04202
93785	69.22	0.50627	2.993				35.2535	5.05259
93985	69.38	0.50712	2.991				35.3349	5.06108
94185	69.46	0.50809	2.992				35.3757	5.07076
94385	69.68	0.50891	2.992				35.4877	5.07894
94585	69.74	0.50979	2.991				35.5183	5.08772
94785	69.94	0.51082	2.991				35.6201	5.098
94985	70	0.5117	2.992				35.6507	5.10679
95185	70.26	0.51271	2.992				35.7831	5.11687
95385	70.36	0.51387	2.993				35.8341	5.12844
95585	70.48	0.51473	2.991				35.8952	5.13703
95785	70.74	0.51574	2.989				36.0276	5.14711
95985	70.8	0.51672	2.993				36.0581	5.15689
96185	70.9	0.51778	2.99				36.1091	5.16747
96385	70.98	0.51876	2.99				36.1498	5.17725
96585	71.2	0.51958	2.991				36.2619	5.18543
96785	71.36	0.52052	2.99				36.3433	5.19481
96985	71.5	0.52147	2.989				36.4147	5.20429
97185	71.52	0.52237	2.989				36.4248	5.21327
97385	71.7	0.5233	2.991				36.5165	5.22255
97585	71.74	0.52429	2.992				36.5369	5.23244
97785	71.96	0.52521	2.99				36.6489	5.24162
97985	72.1	0.52616	2.993				36.7202	5.2511
98185	72.2	0.52703	2.99				36.7712	5.25978
98385	72.22	0.52802	2.991				36.7813	5.26966
98585	72.44	0.52895	2.992				36.8934	5.27894
98785	72.56	0.53	2.99				36.9545	5.28942
98985	72.78	0.53083	2.992				37.0665	5.2977
99185	72.8	0.53182	2.991				37.0767	5.30758
99385	72.92	0.53268	2.99				37.1379	5.31617
99585	73.04	0.53364	2.992				37.199	5.32575
99785	73.2	0.53468	2.989				37.2805	5.33613
99985	73.32	0.53564	2.992				37.3416	5.34571
100185	73.6	0.53664	2.991				37.4842	5.35569
100385	73.64	0.53763	2.991				37.5045	5.36557
100585	73.8	0.53867	2.991				37.586	5.37595
100785	74.06	0.53978	2.99				37.7184	5.38703
100985	74.22	0.54092	2.989				37.7999	5.3984
101185	74.32	0.54189	2.987				37.8509	5.40808
101385	74.36	0.54287	2.99				37.8712	5.41786
101585	74.52	0.54372	2.991				37.9527	5.42635
101785	74.6	0.54459	2.99				37.9935	5.43503
101985	74.7	0.54555	2.991				38.0444	5.44461
102185	74.76	0.54643	2.992				38.075	5.45339
102385	74.92	0.54728	2.991				38.1564	5.46188
102585	75.04	0.54824	2.99				38.2176	5.47146
102785	75.12	0.54931	2.992				38.2583	5.48214
102985	75.42	0.55	2.986				38.4111	5.48902
103185	75.48	0.55108	2.993				38.4416	5.4998
103385	75.54	0.55216	2.989				38.4722	5.51058
103585	75.7	0.553	2.991				38.5537	5.51896
103785	75.84	0.55396	2.988				38.625	5.52854
103985	75.94	0.55482	2.99				38.6759	5.53713
104185	76.02	0.55579	2.987				38.7167	5.54681
104385	76.1	0.55676	2.99				38.7574	5.55649
104585	76.26	0.55761	2.991				38.8389	5.56497
104785	76.42	0.55855	2.989				38.9204	5.57435
104985	76.56	0.5595	2.987				38.9917	5.58383
105185	76.72	0.56035	2.991				39.0732	5.59232
105385	76.8	0.56142	2.989				39.1139	5.60299
105585	76.96	0.56246	2.99				39.1954	5.61337
105785	77.12	0.56331	2.992				39.2769	5.62186
105985	77.28	0.56435	2.99				39.3584	5.63224
106185	77.42	0.5654	2.989				39.4297	5.64271
106385	77.48	0.56638	2.99				39.4602	5.6525
106585	77.58	0.56745	2.99				39.5112	5.66317
106785	77.76	0.56828	2.99				39.6028	5.67146
106985	77.8	0.56917	2.994				39.6232	5.68034
107185	78.1	0.57006	2.991				39.776	5.68922
107385	78.18	0.57094	2.991				39.8167	5.698
107585	78.16	0.57194	2.992				39.8066	5.70798
107785	78.34	0.57288	2.989				39.8982	5.71737
107985	78.46	0.57384	2.99				39.9593	5.72695
108185	78.56	0.5748	2.99				40.0103	5.73653
108385	78.66	0.57567	2.994				40.0612	5.74521
108585	78.78	0.57673	2.989				40.1223	5.75579
108785	78.86	0.5777	2.988				40.1631	5.76547
108985	79	0.57865	2.992				40.2344	5.77495
109185	79.08	0.57952	2.993				40.2751	5.78363
109385	79.22	0.58057	2.99				40.3464	5.79411
109585	79.42	0.5816	2.989				40.4483	5.80439
109785	79.46	0.58239	2.987				40.4686	5.81228
109985	79.54	0.58356	2.991				40.5094	5.82395
110185	79.66	0.58442	2.99				40.5705	5.83253
110385	79.82	0.58536	2.993				40.652	5.84192
110585	79.94	0.58632	2.991				40.7131	5.8515
110785	79.96	0.58721	2.993				40.7233	5.86038
110985	80.24	0.58812	2.991				40.8659	5.86946
111185	80.32	0.58919	2.994				40.9066	5.88014
111385	80.44	0.59015	2.991				40.9678	5.88972
111585	80.46	0.59124	2.991				40.9779	5.9006
111785	80.64	0.59208	2.992				41.0696	5.90898
111985	80.76	0.59313	2.991				41.1307	5.91946
112185	80.86	0.594	2.99				41.1817	5.92814
112385	80.92	0.59498	2.995				41.2122	5.93792
112585	81.06	0.59593	2.99				41.2835	5.94741
112785	81.12	0.59691	2.991				41.3141	5.95719
112985	81.3	0.59774	2.993				41.4057	5.96547
113185	81.42	0.5987	2.994				41.4669	5.97505
113385	81.4	0.59971	2.991				41.4567	5.98513
113585	81.6	0.60064	2.992				41.5585	5.99441
113785	81.8	0.60157	2.992				41.6604	6.00369
113985	81.8	0.60267	2.994				41.6604	6.01467
114185	81.9	0.60353	2.99				41.7113	6.02325
114385	82.14	0.60465	2.99				41.8336	6.03443
114585	82.16	0.60564	2.991				41.8437	6.04431
114785	82.2	0.60653	2.992				41.8641	6.05319
114985	82.28	0.6075	2.993				41.9049	6.06287
115185	82.5	0.60852	2.989				42.0169	6.07305
115385	82.58	0.6094	2.99				42.0576	6.08184
115585	82.7	0.61045	2.994				42.1188	6.09232
115785	82.74	0.61124	2.994				42.1391	6.1002
115985	82.9	0.61228	2.992				42.2206	6.11058
116185	83.02	0.61324	2.991				42.2817	6.12016
116385	83.08	0.61422	2.993				42.3123	6.12994
116585	83.2	0.61508	2.991				42.3734	6.13852
116785	83.26	0.61606	2.993				42.404	6.1483
116985	83.42	0.6171	2.992				42.4855	6.15868
117185	83.52	0.61797	2.987				42.5364	6.16737
117385	83.62	0.61893	2.995				42.5873	6.17695
117585	83.76	0.61998	2.993				42.6586	6.18743
117785	83.82	0.62096	2.991				42.6892	6.19721
117985	83.88	0.62184	2.991				42.7197	6.20599
118185	84	0.6228	2.992				42.7808	6.21557
118385	84.1	0.62376	2.992				42.8318	6.22515
118585	84.2	0.62473	2.991				42.8827	6.23483
118785	84.4	0.62556	2.991				42.9846	6.24311
118985	84.44	0.62665	2.991				43.0049	6.25399
119185	84.54	0.62761	2.99				43.0559	6.26357
119385	84.66	0.62847	2.99				43.117	6.27216
119585	84.76	0.62953	2.99				43.1679	6.28273
119785	84.86	0.6304	2.99				43.2188	6.29142
119985	84.94	0.63137	2.99				43.2596	6.3011
120185	85.04	0.63244	2.991				43.3105	6.31178
120385	85.16	0.63329	2.991				43.3716	6.32026
120585	85.22	0.63447	2.99				43.4022	6.33204
120785	85.4	0.63531	2.989				43.4939	6.34042
120985	85.44	0.6364	2.993				43.5142	6.3513
121185	85.68	0.63731	2.991				43.6365	6.36038
121385	85.74	0.63829	2.986				43.667	6.37016
121585	85.8	0.63937	2.99				43.6976	6.38094
121785	85.9	0.64023	2.989				43.7485	6.38952
121985	85.92	0.64123	2.992				43.7587	6.3995
122185	86.08	0.64227	2.991				43.8402	6.40988
122385	86.06	0.64318	2.992				43.83	6.41896
122585	86.2	0.64413	2.992				43.9013	6.42844
122785	86.22	0.64512	2.99				43.9115	6.43832
122985	86.36	0.64607	2.99				43.9828	6.4478
123185	86.4	0.64696	2.99				44.0032	6.45669
123385	86.52	0.64792	2.99				44.0643	6.46627
123585	86.56	0.6488	2.99				44.0846	6.47505
123785	86.66	0.64977	2.991				44.1356	6.48473
123985	86.86	0.6509	2.988				44.2374	6.49601
124185	86.94	0.65197	2.991				44.2782	6.50669
124385	86.94	0.65297	2.991				44.2782	6.51667
124585	87.16	0.65389	2.991				44.3902	6.52585
124785	87.26	0.65496	2.99				44.4412	6.53653
124985	87.36	0.65592	2.992				44.4921	6.54611
125185	87.34	0.65683	2.991				44.4819	6.55519
125385	87.4	0.65781	2.99				44.5125	6.56497
125585	87.68	0.65861	2.991				44.6551	6.57295
125785	87.68	0.65971	2.986				44.6551	6.58393
125985	87.78	0.66068	2.989				44.706	6.59361
126185	87.8	0.66167	2.992				44.7162	6.60349
126385	87.98	0.66241	2.99				44.8078	6.61088
126585	88.06	0.66348	2.99				44.8486	6.62156
126785	88.1	0.66446	2.993				44.869	6.63134
126985	88.16	0.66524	2.994				44.8995	6.63912
127185	88.18	0.66634	2.991				44.9097	6.6501
127385	88.22	0.66732	2.991				44.9301	6.65988
127585	88.3	0.66829	2.992				44.9708	6.66956
127785	88.32	0.66919	2.991				44.981	6.67854
127985	88.4	0.67016	2.993				45.0218	6.68822
128185	88.5	0.67102	2.989				45.0727	6.69681
128385	88.66	0.67217	2.992				45.1542	6.70828
128585	88.7	0.67315	2.992				45.1745	6.71806
128785	88.78	0.67413	2.99				45.2153	6.72784
128985	88.8	0.67522	2.991				45.2255	6.73872
129185	88.92	0.67608	2.992				45.2866	6.74731
129385	89.04	0.67724	2.994				45.3477	6.75888
129585	89.24	0.67797	2.991				45.4496	6.76617
129785	89.18	0.67909	2.991				45.419	6.77735
129985	89.22	0.67997	2.992				45.4394	6.78613
130185	89.34	0.68093	2.991				45.5005	6.79571
130385	89.36	0.68192	2.993				45.5107	6.80559
130585	89.44	0.6829	2.993				45.5514	6.81537
130785	89.5	0.68377	2.992				45.582	6.82405
130985	89.52	0.68467	2.99				45.5922	6.83303
131185	89.66	0.68562	2.993				45.6635	6.84251
131385	89.66	0.68662	2.993				45.6635	6.8525
131585	89.78	0.68778	2.991				45.7246	6.86407
131785	89.9	0.68873	2.992				45.7857	6.87355
131985	90	0.6898	2.992				45.8366	6.88423
132185	90.02	0.69079	2.991				45.8468	6.89411
132385	90.12	0.69176	2.989				45.8977	6.90379
132585	90.32	0.69279	2.992				45.9996	6.91407
132785	90.34	0.69378	2.994				46.0098	6.92395
132985	90.28	0.6948	2.986				45.9792	6.93413
133185	90.44	0.69575	2.994				46.0607	6.94361
133385	90.36	0.69667	2.992				46.02	6.95279
133585	90.58	0.6976	2.993				46.132	6.96208
133785	90.56	0.6986	2.99				46.1218	6.97206
133985	90.64	0.69958	2.993				46.1626	6.98184
134185	90.72	0.70055	2.991				46.2033	6.99152
134385	90.72	0.70155	2.989				46.2033	7.0015
134585	90.76	0.70243	2.992				46.2237	7.01028
134785	90.86	0.7034	2.993				46.2746	7.01996
134985	90.82	0.70451	2.99				46.2542	7.03104
135185	90.84	0.70551	2.991				46.2644	7.04102
135385	91.02	0.70624	2.994				46.3561	7.0483
135585	90.94	0.70737	2.987				46.3154	7.05958
135785	91.08	0.70822	2.99				46.3867	7.06806
135985	91.08	0.70932	2.995				46.3867	7.07904
136185	91.06	0.71023	2.99				46.3765	7.08812
136385	91.16	0.71129	2.99				46.4274	7.0987
136585	91.22	0.71227	2.991				46.458	7.10848
136785	91.22	0.71327	2.992				46.458	7.11846
136985	91.16	0.71429	2.99				46.4274	7.12864
137185	91.28	0.71505	2.989				46.4885	7.13623
137385	91.34	0.71613	2.988				46.5191	7.14701
137585	91.42	0.717	2.988				46.5598	7.15569
137785	91.5	0.71807	2.989				46.6006	7.16637
137985	91.54	0.71906	2.988				46.6209	7.17625
138185	91.6	0.72004	2.992				46.6515	7.18603
138385	91.54	0.72116	2.993				46.6209	7.19721
138585	91.42	0.7221	2.99				46.5598	7.20659
138785	91.62	0.72313	2.985				46.6617	7.21687
138985	91.64	0.72403	2.991				46.6719	7.22585
139185	91.5	0.72517	2.991				46.6006	7.23723
139385	91.58	0.72635	2.99				46.6413	7.249
139585	91.56	0.72725	2.989				46.6311	7.25798
139785	91.58	0.72825	2.991				46.6413	7.26796
139985	91.56	0.72925	2.989				46.6311	7.27794
140185	91.6	0.73024	2.991				46.6515	7.28782
140385	91.6	0.73124	2.987				46.6515	7.2978
140585	91.6	0.73224	2.99				46.6515	7.30778
140785	91.68	0.73321	2.99				46.6922	7.31747
140985	91.64	0.73423	2.987				46.6719	7.32764
141185	91.68	0.73521	2.989				46.6922	7.33743
141385	91.7	0.7362	2.991				46.7024	7.34731
141585	91.68	0.73711	2.99				46.6922	7.35639
141785	91.78	0.73808	2.991				46.7432	7.36607
141985	91.72	0.7392	2.992				46.7126	7.37725
142185	91.78	0.73998	2.99				46.7432	7.38503
142385	91.8	0.74107	2.991				46.7534	7.39591
142585	91.9	0.74203	2.99				46.8043	7.40549
142785	91.88	0.74314	2.99				46.7941	7.41657
142985	91.88	0.74394	2.987				46.7941	7.42455
143185	91.92	0.74493	2.99				46.8145	7.43443
143385	91.92	0.74603	2.989				46.8145	7.44541
143585	91.88	0.74704	2.991				46.7941	7.45549
143785	91.96	0.74791	2.988				46.8348	7.46417
143985	91.98	0.74911	2.988				46.845	7.47615
144185	91.78	0.75018	2.991				46.7432	7.48683
144385	91.54	0.75126	2.989				46.6209	7.4976
144585	91.22	0.75267	2.992				46.458	7.51168
144785	90.84	0.75401	2.991				46.2644	7.52505
144985	87.9	0.75603	2.992				44.7671	7.54521
145185	88.04	0.75609	2.992				44.8384	7.54581
145385	87.08	0.75882	2.991				44.3495	7.57305
145443	74.58	0.7688	3.039				37.9833	7.67265
145447	61.24	0.77727	3.085				31.1893	7.75719
145461	51.1	0.78781	3.295				26.025	7.86238
145661	51.1	0.78781	3.295				26.025	7.86238
145861	49.3	0.78844	3				25.1083	7.86866
146062	49.14	0.7885	2.991				25.0268	7.86926
146263	49.34	0.78843	2.988				25.1287	7.86856
146463	49.42	0.7884	2.992				25.1694	7.86826
146663	49.42	0.7884	2.991				25.1694	7.86826
146863	49.58	0.77875	2.988				25.2509	7.77196
147064	49.62	0.77983	2.988				25.2713	7.78273
147265	49.58	0.78065	2.989				25.2509	7.79092
147465	49.7	0.7816	2.99				25.312	7.8004
147665	49.78	0.78258	2.989				25.3527	7.81018
147865	49.96	0.78361	2.99				25.4444	7.82046
148066	50.04	0.78449	2.99				25.4852	7.82924
148267	50.14	0.78545	2.987				25.5361	7.83882
148467	50.08	0.78657	2.988				25.5055	7.85
148667	50.2	0.78743	2.992				25.5667	7.85858
148867	50.24	0.78842	2.99				25.587	7.86846
149068	50.44	0.78935	2.99				25.6889	7.87774
149270	50.52	0.79032	2.99				25.7296	7.88743
149471	50.58	0.7914	2.99				25.7602	7.8982
149671	50.72	0.79235	2.992				25.8315	7.90768
149871	50.8	0.79322	2.991				25.8722	7.91637
150071	50.94	0.79417	2.99				25.9435	7.92585
150272	50.9	0.79528	2.992				25.9232	7.93693
150473	51.08	0.79612	2.989				26.0148	7.94531
150673	51.18	0.79709	2.992				26.0658	7.95499
150873	51.16	0.79809	2.991				26.0556	7.96497
151073	51.34	0.79893	2.992				26.1472	7.97335
151274	51.36	0.80002	2.987				26.1574	7.98423
151475	51.48	0.80088	2.991				26.2185	7.99281
151675	51.54	0.80186	2.991				26.2491	8.00259
151875	51.58	0.80285	2.991				26.2695	8.01248
152075	51.76	0.80378	2.991				26.3612	8.02176
152276	51.76	0.80478	2.99				26.3612	8.03174
152478	51.82	0.80586	2.99				26.3917	8.04251
152679	51.94	0.80702	2.99				26.4528	8.05409
152879	51.98	0.80811	2.989				26.4732	8.06497
153079	52.06	0.80888	2.993				26.5139	8.07265
153279	52.18	0.80984	2.989				26.5751	8.08224
153480	52.2	0.81083	2.989				26.5852	8.09212
153681	52.26	0.81191	2.99				26.6158	8.10289
153881	52.28	0.8129	2.992				26.626	8.11277
154081	52.28	0.8138	2.99				26.626	8.12176
154281	52.34	0.81488	2.991				26.6565	8.13253
154482	52.4	0.81576	2.992				26.6871	8.14132
154683	52.26	0.81691	2.988				26.6158	8.15279
154883	52.28	0.8177	2.99				26.626	8.16068
155083	52.2	0.81883	2.993				26.5852	8.17196
155283	52.2	0.81983	2.987				26.5852	8.18194
155484	52.2	0.82093	2.991				26.5852	8.19291
155685	52.14	0.82185	2.991				26.5547	8.2021
155885	52.06	0.82278	2.989				26.5139	8.21138
156085	52.04	0.82389	2.99				26.5038	8.22246
156285	51.96	0.82491	2.993				26.463	8.23263
156485	51.96	0.82601	2.99				26.463	8.24361
156685	51.86	0.82695	2.99				26.4121	8.25299
156885	51.86	0.82805	2.986				26.4121	8.26397
157085	51.68	0.82911	2.991				26.3204	8.27455
157285	51.68	0.83011	2.99				26.3204	8.28453
157485	51.68	0.83111	2.991				26.3204	8.29451
157685	51.66	0.83202	2.991				26.3102	8.30359
157885	51.46	0.83319	2.993				26.2084	8.31527
158085	51.52	0.83417	2.994				26.2389	8.32505
158285	51.42	0.8351	2.989				26.188	8.33433
158485	51.38	0.83622	2.992				26.1676	8.34551
158685	51.38	0.83712	2.991				26.1676	8.35449
158885	51.4	0.83821	2.99				26.1778	8.36537
159085	51.36	0.83922	2.987				26.1574	8.37545
159285	51.3	0.84024	2.989				26.1269	8.38563
159485	51.32	0.84114	2.988				26.1371	8.39461
159685	51.06	0.84233	2.992				26.0046	8.40649
159885	51.14	0.8432	2.991				26.0454	8.41517
160085	51.12	0.84421	2.988				26.0352	8.42525
160285	51.22	0.84517	2.993				26.0861	8.43483
160485	51.2	0.84628	2.992				26.0759	8.44591
160685	51.1	0.84731	2.991				26.025	8.45619
160885	51.08	0.84832	2.994				26.0148	8.46627
161085	51.1	0.84921	2.99				26.025	8.47515
161285	51.1	0.85021	2.99				26.025	8.48513
161485	51.08	0.85122	2.989				26.0148	8.49521
161685	51.04	0.85224	2.991				25.9945	8.50539
161885	51.02	0.85334	2.991				25.9843	8.51637
162085	51.06	0.85433	2.99				26.0046	8.52625
162285	50.98	0.85536	2.991				25.9639	8.53653
162485	50.98	0.85636	2.991				25.9639	8.54651
162685	50.92	0.85728	2.989				25.9333	8.55569
162885	50.96	0.85836	2.991				25.9537	8.56647
163085	50.88	0.85939	2.991				25.913	8.57675
163285	50.9	0.86028	2.993				25.9232	8.58563
163485	50.86	0.8613	2.991				25.9028	8.59581
163685	50.8	0.86242	2.992				25.8722	8.60699
163885	50.88	0.86329	2.991				25.913	8.61567
164085	50.7	0.86445	2.991				25.8213	8.62725
164285	50.74	0.86524	2.992				25.8417	8.63513
164485	50.76	0.86613	2.992				25.8519	8.64401
164685	50.78	0.86723	2.993				25.862	8.65499
164885	50.66	0.86827	2.99				25.8009	8.66537
165085	50.6	0.86939	2.992				25.7704	8.67655
165285	50.68	0.87026	2.993				25.8111	8.68523
165485	50.6	0.87139	2.992				25.7704	8.69651
165685	50.58	0.8724	2.993				25.7602	8.70659
165885	50.52	0.87352	2.992				25.7296	8.71776
166085	50.56	0.8745	2.991				25.75	8.72754
166285	50.48	0.87553	2.991				25.7093	8.73782
166485	50.44	0.87655	2.99				25.6889	8.748
166685	50.44	0.87755	2.99				25.6889	8.75798
166885	50.44	0.87855	2.987				25.6889	8.76796
167085	50.3	0.87949	2.991				25.6176	8.77735
167285	50.32	0.88059	2.989				25.6278	8.78832
167485	50.36	0.88157	2.991				25.6481	8.7981
167685	50.34	0.88258	2.988				25.638	8.80818
167885	50.22	0.88362	2.991				25.5768	8.81856
168085	50.1	0.88456	2.989				25.5157	8.82794
168285	50.1	0.88556	2.988				25.5157	8.83792
168485	50.04	0.88649	2.99				25.4852	8.84721
168685	49.98	0.88761	2.99				25.4546	8.85838
168885	49.96	0.88861	2.991				25.4444	8.86836
169085	50.04	0.88959	2.987				25.4852	8.87814
169285	50	0.8907	2.99				25.4648	8.88922
169485	49.78	0.89168	2.989				25.3527	8.899
169685	49.86	0.89255	2.99				25.3935	8.90768
169885	49.8	0.89367	2.99				25.3629	8.91886
170085	49.82	0.89466	2.99				25.3731	8.92874
170285	49.72	0.8957	2.99				25.3222	8.93912
170485	49.78	0.89668	2.989				25.3527	8.9489
170685	49.7	0.8977	2.989				25.312	8.95908
170885	49.68	0.89881	2.991				25.3018	8.97016
171085	49.6	0.89984	2.991				25.2611	8.98044
171285	49.56	0.90075	2.989				25.2407	8.98952
171485	49.6	0.90174	2.989				25.2611	8.9994
171685	49.64	0.90273	2.988				25.2814	9.00928
171885	49.52	0.90377	2.989				25.2203	9.01966
172085	49.54	0.90476	2.994				25.2305	9.02954
172285	49.5	0.90577	2.986				25.2101	9.03962
172485	49.5	0.90657	2.993				25.2101	9.0476
172685	49.46	0.90759	2.992				25.1898	9.05778
172885	49.4	0.90871	2.992				25.1592	9.06896
173085	49.48	0.90968	2.989				25.2	9.07864
173285	49.42	0.9108	2.988				25.1694	9.08982
173485	49.52	0.91177	2.991				25.2203	9.0995
173685	49.48	0.91288	2.988				25.2	9.11058
173885	49.42	0.9138	2.989				25.1694	9.11976
174085	49.28	0.91485	2.99				25.0981	9.13024
174285	49.34	0.91583	2.99				25.1287	9.14002
174485	49.28	0.91695	2.99				25.0981	9.1512
174685	49.14	0.918	2.988				25.0268	9.16168
174885	48.8	0.91882	2.993				24.8536	9.16986
175085	48.62	0.91978	2.989				24.762	9.17944
175285	48.3	0.92139	2.988				24.599	9.19551
175485	48.2	0.92253	2.991				24.5481	9.20689
175685	47.86	0.92355	2.99				24.3749	9.21707
175885	47.8	0.92437	2.988				24.3443	9.22525
176085	47.72	0.9253	2.989				24.3036	9.23453
176285	47.74	0.92609	2.99				24.3138	9.24242
176485	47.74	0.92709	2.991				24.3138	9.2524
176685	47.74	0.92819	2.989				24.3138	9.26337
176885	47.76	0.92918	2.99				24.324	9.27325
177085	47.82	0.93006	2.993				24.3545	9.28204
177285	47.78	0.93128	2.991				24.3342	9.29421
177485	47.8	0.93227	2.99				24.3443	9.30409
177685	47.72	0.9332	2.989				24.3036	9.31337
177885	47.64	0.93433	2.99				24.2629	9.32465
178085	47.66	0.93522	2.991				24.273	9.33353
178285	47.64	0.93623	2.988				24.2629	9.34361
178485	47.6	0.93704	2.987				24.2425	9.3517
178685	47.56	0.93835	2.987				24.2221	9.36477
178885	47.5	0.93957	2.99				24.1916	9.37695
179085	47.4	0.94071	2.99				24.1406	9.38832
179285	47.2	0.94158	2.992				24.0388	9.39701
179485	47.16	0.94259	2.988				24.0184	9.40709
179685	47.06	0.94353	2.992				23.9675	9.41647
179885	47.14	0.9445	2.99				24.0082	9.42615
180085	47.14	0.9456	2.988				24.0082	9.43713
180285	47.02	0.94654	2.991				23.9471	9.44651
180485	47.08	0.94752	2.99				23.9776	9.45629
180685	46.98	0.94856	2.991				23.9267	9.46667
180885	47.1	0.94951	2.991				23.9878	9.47615
181085	47.04	0.95064	2.991				23.9573	9.48743
181285	46.96	0.95166	2.99				23.9165	9.4976
181485	46.9	0.95248	2.989				23.886	9.50579
181685	46.92	0.95348	2.992				23.8962	9.51577
181885	47.02	0.95454	2.99				23.9471	9.52635
182085	46.96	0.95556	2.991				23.9165	9.53653
182285	46.9	0.95658	2.988				23.886	9.54671
182485	46.94	0.95757	2.99				23.9063	9.55659
182685	46.92	0.95848	2.988				23.8962	9.56567
182885	46.88	0.95959	2.99				23.8758	9.57675
183085	46.86	0.9605	2.99				23.8656	9.58583
183285	46.94	0.96147	2.993				23.9063	9.59551
183485	46.98	0.96246	2.99				23.9267	9.60539
183685	46.9	0.96348	2.991				23.886	9.61557
183885	46.86	0.9645	2.99				23.8656	9.62575
184085	46.9	0.96558	2.989				23.886	9.63653
184285	46.92	0.96648	2.989				23.8962	9.64551
184485	46.94	0.96747	2.989				23.9063	9.65539
184685	46.96	0.96856	2.991				23.9165	9.66627
184885	46.9	0.96948	2.991				23.886	9.67545
185085	46.86	0.9706	2.989				23.8656	9.68663
185285	46.86	0.9715	2.986				23.8656	9.69561
185485	46.74	0.97254	2.989				23.8045	9.70599
185685	46.82	0.97351	2.991				23.8452	9.71567
185885	46.76	0.97463	2.989				23.8147	9.72685
186085	46.7	0.97555	2.988				23.7841	9.73603
186285	46.66	0.97667	2.992				23.7637	9.74721
186485	46.74	0.97774	2.991				23.8045	9.75788
186685	46.62	0.97878	2.991				23.7434	9.76826
186885	46.72	0.97965	2.99				23.7943	9.77695
187085	46.6	0.98079	2.99				23.7332	9.78832
187285	46.62	0.98178	2.993				23.7434	9.7982
187485	46.62	0.98278	2.989				23.7434	9.80818
187685	46.54	0.98381	2.991				23.7026	9.81846
187885	46.62	0.98478	2.993				23.7434	9.82814
188085	46.5	0.98583	2.989				23.6823	9.83862
188285	46.56	0.9866	2.991				23.7128	9.84631
188485	46.48	0.98773	2.989				23.6721	9.85758
188685	46.48	0.98873	2.99				23.6721	9.86756
188885	46.5	0.98972	2.992				23.6823	9.87745
189085	46.42	0.99065	2.993				23.6415	9.88673
189285	46.46	0.99164	2.991				23.6619	9.89661
189485	46.48	0.99263	2.991				23.6721	9.90649
189685	46.48	0.99373	2.991				23.6721	9.91747
189885	46.56	0.9947	2.992				23.7128	9.92715
190085	46.36	0.99567	2.991				23.611	9.93683
190285	46.44	0.99675	2.99				23.6517	9.9476
190485	46.42	0.99775	2.991				23.6415	9.95758
190685	46.4	0.99866	2.994				23.6313	9.96667
190885	46.38	0.99977	2.988				23.6211	9.97774
191085	46.46	1.00074	2.992				23.6619	9.98743
191285	46.4	1.00176	2.994				23.6313	9.9976
191485	46.36	1.00277	2.993				23.611	10.0077
191685	46.44	1.00365	2.993				23.6517	10.0165
191885	46.46	1.00464	2.992				23.6619	10.0263
192085	46.34	1.00578	2.992				23.6008	10.0377
192285	46.36	1.00677	2.991				23.611	10.0476
192485	46.32	1.00779	2.991				23.5906	10.0578
192685	46.3	1.0088	2.99				23.5804	10.0679
192885	46.42	1.00975	2.992				23.6415	10.0773
193085	46.32	1.01089	2.991				23.5906	10.0887
193285	46.34	1.01188	2.99				23.6008	10.0986
193485	46.3	1.01289	2.994				23.5804	10.1087
193685	46.34	1.01388	2.992				23.6008	10.1186
193885	46.32	1.01489	2.99				23.5906	10.1286
194085	46.2	1.01593	2.991				23.5295	10.139
194285	46.22	1.01692	2.989				23.5397	10.1489
194485	46.28	1.0179	2.991				23.5702	10.1587
194685	46.24	1.01882	2.991				23.5498	10.1679
194885	46.12	1.01996	2.99				23.4887	10.1792
195085	46.22	1.02082	2.991				23.5397	10.1878
195285	46.08	1.02187	2.991				23.4684	10.1983
195485	46.06	1.02298	2.991				23.4582	10.2094
195685	46.1	1.02397	2.989				23.4785	10.2193
195885	46.08	1.02497	2.992				23.4684	10.2292
196085	46	1.0259	2.992				23.4276	10.2385
196285	46.02	1.02689	2.989				23.4378	10.2484
196485	46.1	1.02786	2.989				23.4785	10.2581
196685	46.1	1.02886	2.991				23.4785	10.2681
196885	46	1.0298	2.99				23.4276	10.2774
197085	45.96	1.03091	2.991				23.4072	10.2885
197285	46.02	1.03189	2.99				23.4378	10.2983
197485	46	1.033	2.992				23.4276	10.3094
197685	46.04	1.03389	2.99				23.448	10.3183
197885	46	1.0349	2.99				23.4276	10.3283
198085	46.02	1.03599	2.987				23.4378	10.3392
198285	45.98	1.03691	2.989				23.4174	10.3484
198485	45.98	1.03791	2.991				23.4174	10.3584
198685	45.9	1.03893	2.991				23.3767	10.3686
198885	45.96	1.03981	2.988				23.4072	10.3773
199085	45.88	1.04084	2.99				23.3665	10.3876
199285	45.86	1.04185	2.99				23.3563	10.3977
199485	45.84	1.04286	2.99				23.3461	10.4078
199685	45.8	1.04397	2.992				23.3257	10.4189
199885	45.84	1.04506	2.989				23.3461	10.4297
200085	45.74	1.04599	2.991				23.2952	10.439
200285	45.76	1.04698	2.989				23.3054	10.4489
200485	45.78	1.04798	2.989				23.3156	10.4589
200685	45.78	1.04888	2.99				23.3156	10.4679
200885	45.8	1.04997	2.989				23.3257	10.4787
201085	45.82	1.05096	2.99				23.3359	10.4886
201285	45.76	1.05198	2.99				23.3054	10.4988
201485	45.78	1.05298	2.99				23.3156	10.5088
201685	45.7	1.0541	2.989				23.2748	10.52
201885	45.74	1.05499	2.989				23.2952	10.5288
202085	45.68	1.05611	2.989				23.2646	10.54
