# Supplementary material for: Physical and Mechanical Properties of Gypsum‐Like Rock Materials
Source: Hindawi journal article supplement (doi:10.1155/2020/3703706), 2020-01-01
Supplement: f1 [file 3703706.f1.zip › 3703706.f1/Natural uniaxial compression test data.xlsx]

## Sheet: A-1
Force (small)	--	journey	) Results Report
17:21:53,06/23/2019
Diameter: 49.1	mm	Height: 100.4	mm
Vertical force transducer (Test piece vertical force)
Control mode: displacement	Waveform: Slope
mm/s	Force the finish:1.2502	mm
Time (ms)	Vertical force (KN)	Vertical deformation (mm)	Transverse deformation (mm)		stress	Axial strain	transvrsal strain
0	0	0	0		0	0	0
200	0.022	0.0014	0.0001		0.011619	0.0139442	0.00203666
401	0.018	0.002	0		0.00950648	0.0199203	0
601	0.038	0.0032	0		0.0200692	0.0318725	0
801	0.042	0.0042	-0.0001		0.0221818	0.0418327	-0.00203666
1003	0.05	0.0048	0		0.0264069	0.0478088	0
1204	0.056	0.0062	0		0.0295757	0.061753	0
1404	0.066	0.0071	-0.0001		0.0348571	0.0707171	-0.00203666
1605	0.07	0.0079	-0.0001		0.0369696	0.0786853	-0.00203666
1805	0.076	0.0088	-0.0001		0.0401385	0.0876494	-0.00203666
2005	0.09	0.0098	-0.0001		0.0475324	0.0976096	-0.00203666
2206	0.1	0.0109	-0.0001		0.0528138	0.108566	-0.00203666
2406	0.108	0.012	-0.0001		0.0570389	0.119522	-0.00203666
2607	0.114	0.0131	-0.0001		0.0602077	0.130478	-0.00203666
2807	0.122	0.0142	-0.0001		0.0644328	0.141434	-0.00203666
3007	0.128	0.0152	-0.0001		0.0676016	0.151394	-0.00203666
3208	0.136	0.0162	-0.0001		0.0718267	0.161355	-0.00203666
3408	0.146	0.0172	-0.0001		0.0771081	0.171315	-0.00203666
3609	0.152	0.0181	-0.0001		0.0802769	0.180279	-0.00203666
3809	0.156	0.0191	-0.0001		0.0823895	0.190239	-0.00203666
4009	0.168	0.02	-0.0001		0.0887271	0.199203	-0.00203666
4211	0.174	0.0211	-0.0001		0.091896	0.210159	-0.00203666
4412	0.182	0.0218	-0.0001		0.0961211	0.217131	-0.00203666
4612	0.194	0.023	-0.0001		0.102459	0.229084	-0.00203666
4813	0.202	0.0238	-0.0001		0.106684	0.237052	-0.00203666
5013	0.21	0.025	-0.0001		0.110909	0.249004	-0.00203666
5213	0.22	0.026	0		0.11619	0.258964	0
5414	0.226	0.027	0		0.119359	0.268924	0
5614	0.234	0.0278	0		0.123584	0.276892	0
5815	0.244	0.029	0.0001		0.128866	0.288845	0.00203666
6015	0.254	0.0299	-0.0001		0.134147	0.297809	-0.00203666
6215	0.264	0.031	-0.0001		0.139428	0.308765	-0.00203666
6416	0.27	0.0319	-0.0001		0.142597	0.317729	-0.00203666
6616	0.282	0.033	-0.0001		0.148935	0.328685	-0.00203666
6817	0.294	0.0339	-0.0001		0.155272	0.337649	-0.00203666
7017	0.304	0.0349	-0.0001		0.160554	0.34761	-0.00203666
7217	0.312	0.036	-0.0001		0.164779	0.358566	-0.00203666
7419	0.324	0.037	-0.0001		0.171117	0.368526	-0.00203666
7620	0.336	0.038	-0.0001		0.177454	0.378486	-0.00203666
7820	0.344	0.039	-0.0001		0.181679	0.388446	-0.00203666
8021	0.356	0.0401	0		0.188017	0.399402	0
8221	0.366	0.0409	-0.0001		0.193298	0.407371	-0.00203666
8421	0.378	0.0421	-0.0001		0.199636	0.419323	-0.00203666
8622	0.388	0.043	0		0.204917	0.428287	0
8822	0.402	0.0441	0		0.212311	0.439243	0
9023	0.414	0.0452	-0.0001		0.218649	0.450199	-0.00203666
9223	0.424	0.0461	0		0.22393	0.459163	0
9423	0.438	0.0471	0		0.231324	0.469124	0
9624	0.448	0.0481	-0.0001		0.236606	0.479084	-0.00203666
9824	0.462	0.0491	0		0.244	0.489044	0
10025	0.472	0.0502	0		0.249281	0.5	0
10225	0.486	0.0512	0		0.256675	0.50996	0
10425	0.498	0.0522	0		0.263013	0.51992	0
10627	0.51	0.0532	0.0001		0.26935	0.52988	0.00203666
10828	0.522	0.0543	0.0002		0.275688	0.540837	0.00407332
11028	0.532	0.0552	0.0003		0.280969	0.549801	0.00610998
11229	0.546	0.0561	0.0004		0.288363	0.558765	0.00814664
11429	0.556	0.0571	0.0005		0.293645	0.568725	0.0101833
11629	0.57	0.0581	0.0007		0.301038	0.578685	0.0142566
11830	0.582	0.0592	0.0009		0.307376	0.589641	0.0183299
12030	0.598	0.0602	0.001		0.315826	0.599602	0.0203666
12231	0.612	0.0614	0.0012		0.32322	0.611554	0.0244399
12431	0.624	0.0623	0.0014		0.329558	0.620518	0.0285132
12631	0.638	0.0632	0.0016		0.336952	0.629482	0.0325866
12832	0.652	0.0643	0.0018		0.344346	0.640438	0.0366599
13032	0.666	0.0652	0.002		0.35174	0.649402	0.0407332
13233	0.682	0.0664	0.0022		0.36019	0.661355	0.0448065
13433	0.696	0.0674	0.0025		0.367584	0.671315	0.0509165
13633	0.71	0.0684	0.0026		0.374978	0.681275	0.0529532
13835	0.726	0.0692	0.0028		0.383428	0.689243	0.0570265
14036	0.74	0.0702	0.003		0.390822	0.699203	0.0610998
14236	0.756	0.071	0.0032		0.399272	0.707171	0.0651731
14437	0.768	0.0722	0.0033		0.40561	0.719124	0.0672098
14637	0.784	0.0731	0.0036		0.41406	0.728088	0.0733198
14837	0.8	0.0742	0.0038		0.42251	0.739044	0.0773931
15038	0.816	0.0753	0.0041		0.43096	0.75	0.0835031
15238	0.834	0.0762	0.0042		0.440467	0.758964	0.0855397
15439	0.85	0.0772	0.0045		0.448917	0.768924	0.0916497
15639	0.868	0.0782	0.0046		0.458423	0.778884	0.0936864
15839	0.884	0.0792	0.0049		0.466874	0.788845	0.0997963
16040	0.902	0.0802	0.0051		0.47638	0.798805	0.10387
16240	0.922	0.0812	0.0053		0.486943	0.808765	0.107943
16441	0.938	0.0822	0.0055		0.495393	0.818725	0.112016
16641	0.958	0.0832	0.0058		0.505956	0.828685	0.118126
16841	0.974	0.0842	0.0061		0.514406	0.838645	0.124236
17043	0.996	0.0851	0.0063		0.526025	0.84761	0.12831
17244	1.014	0.0862	0.0065		0.535532	0.858566	0.132383
17444	1.034	0.0871	0.0068		0.546094	0.86753	0.138493
17645	1.054	0.0881	0.0071		0.556657	0.87749	0.144603
17845	1.076	0.0892	0.0073		0.568276	0.888446	0.148676
18045	1.096	0.09	0.0076		0.578839	0.896414	0.154786
18246	1.118	0.091	0.0078		0.590458	0.906375	0.158859
18446	1.144	0.092	0.0082		0.604189	0.916335	0.167006
18647	1.168	0.0931	0.008		0.616865	0.927291	0.162933
18847	1.19	0.094	0.0083		0.628484	0.936255	0.169043
19047	1.218	0.095	0.0086		0.643272	0.946215	0.175153
19248	1.246	0.096	0.009		0.65806	0.956175	0.183299
19448	1.28	0.097	0.0096		0.676016	0.966135	0.195519
19649	1.314	0.0981	0.0099		0.693973	0.977092	0.201629
19849	1.348	0.099	0.0105		0.71193	0.986056	0.213849
20049	1.384	0.1	0.0108		0.730943	0.996016	0.219959
20250	1.42	0.101	0.0114		0.749955	1.00598	0.232179
20450	1.458	0.1021	0.0115		0.770025	1.01693	0.234216
20651	1.492	0.1031	0.0118		0.787981	1.02689	0.240326
20851	1.53	0.104	0.0122		0.808051	1.03586	0.248473
21051	1.566	0.105	0.0124		0.827064	1.04582	0.252546
21253	1.61	0.106	0.0128		0.850302	1.05578	0.260692
21454	1.646	0.1071	0.0132		0.869315	1.06673	0.268839
21654	1.682	0.1081	0.0135		0.888328	1.07669	0.274949
21855	1.724	0.1091	0.0138		0.910509	1.08665	0.281059
22055	1.764	0.1102	0.0142		0.931635	1.09761	0.289206
22255	1.804	0.1111	0.0145		0.95276	1.10657	0.295316
22456	1.842	0.1121	0.0148		0.97283	1.11653	0.301426
22656	1.886	0.1131	0.0151		0.996068	1.12649	0.307536
22857	1.932	0.1143	0.0155		1.02036	1.13845	0.315682
23057	1.972	0.1152	0.0158		1.04149	1.14741	0.321792
23257	2.016	0.1162	0.0162		1.06473	1.15737	0.329939
23458	2.058	0.1172	0.0166		1.08691	1.16733	0.338086
23658	2.098	0.1182	0.0169		1.10803	1.17729	0.344196
23859	2.142	0.1191	0.0173		1.13127	1.18625	0.352342
24059	2.184	0.1203	0.0176		1.15345	1.19821	0.358452
24259	2.23	0.1213	0.0179		1.17775	1.20817	0.364562
24461	2.272	0.1223	0.0182		1.19993	1.21813	0.370672
24662	2.316	0.1233	0.0185		1.22317	1.22809	0.376782
24862	2.358	0.1243	0.0188		1.24535	1.23805	0.382892
25063	2.398	0.1253	0.0191		1.26647	1.24801	0.389002
25263	2.442	0.1264	0.0194		1.28971	1.25896	0.395112
25463	2.486	0.1273	0.0197		1.31295	1.26793	0.401222
25664	2.532	0.1283	0.02		1.33724	1.27789	0.407332
25864	2.58	0.1292	0.0202		1.3626	1.28685	0.411405
26065	2.62	0.1303	0.0205		1.38372	1.29781	0.417515
26265	2.664	0.1314	0.0208		1.40696	1.30876	0.423625
26465	2.706	0.1324	0.021		1.42914	1.31873	0.427699
26666	2.748	0.1333	0.0213		1.45132	1.32769	0.433809
26866	2.788	0.1343	0.0216		1.47245	1.33765	0.439919
27067	2.834	0.1352	0.0218		1.49674	1.34661	0.443992
27267	2.876	0.1363	0.0221		1.51892	1.35757	0.450102
27467	2.92	0.1373	0.0224		1.54216	1.36753	0.456212
27669	2.96	0.1383	0.0225		1.56329	1.37749	0.458248
27870	3.004	0.1392	0.0227		1.58653	1.38645	0.462322
28070	3.048	0.1404	0.0229		1.60976	1.39841	0.466395
28271	3.088	0.1413	0.0232		1.63089	1.40737	0.472505
28471	3.13	0.1422	0.0235		1.65307	1.41633	0.478615
28671	3.174	0.1431	0.0236		1.67631	1.4253	0.480652
28872	3.22	0.1443	0.0238		1.7006	1.43725	0.484725
29072	3.264	0.1453	0.0242		1.72384	1.44721	0.492872
29273	3.308	0.1463	0.0243		1.74708	1.45717	0.494908
29473	3.348	0.1473	0.0245		1.7682	1.46713	0.498982
29673	3.394	0.1482	0.0247		1.7925	1.4761	0.503055
29874	3.434	0.1493	0.0249		1.81362	1.48705	0.507128
30074	3.478	0.1503	0.0252		1.83686	1.49701	0.513238
30275	3.522	0.1513	0.0254		1.8601	1.50697	0.517312
30475	3.566	0.1522	0.0256		1.88334	1.51594	0.521385
30675	3.61	0.1533	0.0258		1.90658	1.52689	0.525458
30877	3.652	0.1543	0.026		1.92876	1.53685	0.529532
31078	3.696	0.1553	0.0263		1.952	1.54681	0.535642
31278	3.738	0.1564	0.0264		1.97418	1.55777	0.537678
31479	3.782	0.1572	0.0266		1.99742	1.56574	0.541752
31679	3.826	0.1582	0.0269		2.02065	1.5757	0.547862
31879	3.87	0.1593	0.0271		2.04389	1.58665	0.551935
32080	3.914	0.1604	0.0273		2.06713	1.59761	0.556008
32280	3.956	0.1613	0.0275		2.08931	1.60657	0.560081
32481	3.998	0.1623	0.0277		2.11149	1.61653	0.564155
32681	4.04	0.1633	0.0278		2.13368	1.62649	0.566191
32881	4.08	0.1645	0.028		2.1548	1.63845	0.570265
33082	4.122	0.1654	0.0282		2.17698	1.64741	0.574338
33282	4.162	0.1664	0.0282		2.19811	1.65737	0.574338
33483	4.206	0.1672	0.0284		2.22135	1.66534	0.578411
33683	4.244	0.1683	0.0286		2.24142	1.67629	0.582485
33883	4.288	0.1693	0.0288		2.26465	1.68625	0.586558
34085	4.328	0.1704	0.029		2.28578	1.69721	0.590631
34286	4.368	0.1712	0.029		2.30691	1.70518	0.590631
34486	4.414	0.1723	0.0293		2.3312	1.71614	0.596741
34687	4.456	0.1733	0.0296		2.35338	1.7261	0.602851
34887	4.498	0.1743	0.0296		2.37556	1.73606	0.602851
35087	4.54	0.1752	0.0298		2.39774	1.74502	0.606925
35288	4.58	0.1763	0.03		2.41887	1.75598	0.610998
35488	4.622	0.1773	0.0301		2.44105	1.76594	0.613035
35689	4.666	0.1783	0.0302		2.46429	1.7759	0.615071
35889	4.708	0.1793	0.0304		2.48647	1.78586	0.619145
36089	4.75	0.1803	0.0305		2.50865	1.79582	0.621181
36290	4.79	0.1813	0.0307		2.52978	1.80578	0.625255
36490	4.832	0.1823	0.0309		2.55196	1.81574	0.629328
36691	4.87	0.1833	0.031		2.57203	1.8257	0.631365
36891	4.916	0.1843	0.0312		2.59632	1.83566	0.635438
37091	4.956	0.1853	0.0313		2.61745	1.84562	0.637475
37293	4.996	0.1863	0.0314		2.63858	1.85558	0.639511
37494	5.038	0.1873	0.0316		2.66076	1.86554	0.643585
37694	5.08	0.1883	0.0317		2.68294	1.8755	0.645621
37895	5.122	0.1893	0.0319		2.70512	1.88546	0.649695
38095	5.164	0.1903	0.0321		2.7273	1.89542	0.653768
38295	5.208	0.1913	0.0322		2.75054	1.90538	0.655804
38496	5.246	0.1923	0.0324		2.77061	1.91534	0.659878
38696	5.288	0.1933	0.0325		2.79279	1.9253	0.661914
38897	5.33	0.1942	0.0327		2.81497	1.93426	0.665988
39097	5.372	0.1952	0.0327		2.83716	1.94422	0.665988
39297	5.412	0.1961	0.0329		2.85828	1.95319	0.670061
39498	5.454	0.1972	0.0331		2.88046	1.96414	0.674134
39698	5.502	0.1982	0.0332		2.90581	1.9741	0.676171
39899	5.542	0.1992	0.0334		2.92694	1.98406	0.680244
40099	5.582	0.2002	0.0335		2.94806	1.99402	0.682281
40299	5.626	0.2011	0.0337		2.9713	2.00299	0.686354
40500	5.674	0.2022	0.0338		2.99665	2.01394	0.688391
40700	5.72	0.2032	0.0338		3.02095	2.0239	0.688391
40901	5.762	0.2043	0.0341		3.04313	2.03486	0.694501
41101	5.806	0.2052	0.0341		3.06637	2.04382	0.694501
41301	5.85	0.2062	0.0342		3.08961	2.05378	0.696538
41503	5.892	0.2072	0.0343		3.11179	2.06375	0.698574
41704	5.936	0.2083	0.0345		3.13503	2.0747	0.702648
41904	5.978	0.2091	0.0347		3.15721	2.08267	0.706721
42105	6.02	0.2102	0.0349		3.17939	2.09363	0.710794
42305	6.064	0.2112	0.0348		3.20263	2.10359	0.708758
42505	6.106	0.212	0.0351		3.22481	2.11155	0.714868
42706	6.15	0.2132	0.0352		3.24805	2.12351	0.716904
42906	6.196	0.2141	0.0352		3.27234	2.13247	0.716904
43107	6.248	0.2153	0.0354		3.2998	2.14442	0.720978
43307	6.298	0.2162	0.0355		3.32621	2.15339	0.723014
43507	6.35	0.2174	0.0356		3.35367	2.16534	0.725051
43708	6.394	0.2184	0.0358		3.37691	2.1753	0.729124
43908	6.438	0.2194	0.0359		3.40015	2.18526	0.731161
44109	6.484	0.2203	0.036		3.42444	2.19422	0.733198
44309	6.53	0.2213	0.0363		3.44874	2.20418	0.739308
44509	6.578	0.2223	0.0363		3.47409	2.21414	0.739308
44711	6.622	0.2233	0.0365		3.49733	2.2241	0.743381
44912	6.67	0.2243	0.0366		3.52268	2.23406	0.745418
45112	6.72	0.2253	0.0367		3.54909	2.24402	0.747454
45313	6.77	0.2263	0.0369		3.57549	2.25398	0.751527
45513	6.816	0.2273	0.037		3.59979	2.26394	0.753564
45713	6.864	0.2283	0.0371		3.62514	2.2739	0.755601
45914	6.912	0.2293	0.0374		3.65049	2.28386	0.761711
46114	6.964	0.2303	0.0375		3.67795	2.29382	0.763747
46315	7.012	0.2312	0.0375		3.7033	2.30279	0.763747
46515	7.058	0.2322	0.0376		3.7276	2.31275	0.765784
46715	7.11	0.2332	0.0377		3.75506	2.32271	0.767821
46916	7.16	0.2343	0.0378		3.78147	2.33367	0.769857
47116	7.21	0.2353	0.038		3.80787	2.34363	0.773931
47317	7.258	0.2361	0.038		3.83322	2.35159	0.773931
47517	7.314	0.2371	0.0381		3.8628	2.36155	0.775967
47717	7.364	0.2381	0.0384		3.88921	2.37151	0.782077
47919	7.416	0.2392	0.0384		3.91667	2.38247	0.782077
48120	7.476	0.2401	0.0385		3.94836	2.39143	0.784114
48320	7.536	0.2412	0.0386		3.98005	2.40239	0.786151
48521	7.594	0.2423	0.0387		4.01068	2.41335	0.788187
48721	7.65	0.2433	0.0389		4.04025	2.42331	0.792261
48921	7.708	0.2443	0.0389		4.07089	2.43327	0.792261
49122	7.76	0.2452	0.0391		4.09835	2.44223	0.796334
49322	7.816	0.2463	0.0393		4.12792	2.45319	0.800407
49523	7.874	0.2471	0.0394		4.15856	2.46116	0.802444
49723	7.932	0.2483	0.0395		4.18919	2.47311	0.804481
49923	7.988	0.2492	0.0395		4.21876	2.48207	0.804481
50124	8.048	0.2502	0.0397		4.25045	2.49203	0.808554
50324	8.108	0.2512	0.0397		4.28214	2.50199	0.808554
50525	8.17	0.2521	0.0399		4.31488	2.51096	0.812627
50725	8.234	0.2532	0.0399		4.34869	2.52191	0.812627
50925	8.292	0.2543	0.0399		4.37932	2.53287	0.812627
51127	8.348	0.2552	0.0402		4.40889	2.54183	0.818737
51328	8.406	0.2563	0.0402		4.43953	2.55279	0.818737
51528	8.468	0.2572	0.0402		4.47227	2.56175	0.818737
51729	8.526	0.2582	0.0404		4.5029	2.57171	0.822811
51929	8.59	0.2592	0.0404		4.5367	2.58167	0.822811
52129	8.65	0.2601	0.0406		4.56839	2.59064	0.826884
52330	8.708	0.2609	0.0407		4.59902	2.59861	0.828921
52530	8.776	0.2621	0.0408		4.63494	2.61056	0.830957
52731	8.838	0.2631	0.0409		4.66768	2.62052	0.832994
52931	8.9	0.2641	0.0409		4.70043	2.63048	0.832994
53131	8.966	0.2651	0.0411		4.73528	2.64044	0.837067
53332	9.028	0.2661	0.0411		4.76803	2.6504	0.837067
53532	9.092	0.2671	0.0411		4.80183	2.66036	0.837067
53733	9.154	0.268	0.0413		4.83457	2.66932	0.841141
53933	9.218	0.2691	0.0413		4.86837	2.68028	0.841141
54133	9.284	0.27	0.0413		4.90323	2.68924	0.841141
54335	9.35	0.271	0.0414		4.93809	2.6992	0.843177
54536	9.426	0.2721	0.0415		4.97823	2.71016	0.845214
54736	9.5	0.2732	0.0417		5.01731	2.72112	0.849287
54937	9.566	0.2743	0.0419		5.05216	2.73207	0.85336
55137	9.634	0.2753	0.0418		5.08808	2.74203	0.851324
55337	9.7	0.2762	0.042		5.12294	2.751	0.855397
55538	9.768	0.2773	0.042		5.15885	2.76195	0.855397
55738	9.832	0.2783	0.0421		5.19265	2.77191	0.857434
55939	9.898	0.2792	0.042		5.22751	2.78088	0.855397
56139	9.968	0.2803	0.0422		5.26448	2.79183	0.85947
56339	10.04	0.2812	0.0423		5.3025	2.8008	0.861507
56540	10.108	0.2822	0.0423		5.33842	2.81076	0.861507
56740	10.174	0.2832	0.0422		5.37327	2.82072	0.85947
56941	10.244	0.2842	0.0423		5.41024	2.83068	0.861507
57141	10.312	0.2852	0.0424		5.44616	2.84064	0.863544
57341	10.38	0.2861	0.0425		5.48207	2.8496	0.86558
57543	10.446	0.2871	0.0427		5.51693	2.85956	0.869654
57744	10.514	0.2882	0.0428		5.55284	2.87052	0.87169
57944	10.582	0.2891	0.0427		5.58875	2.87948	0.869654
58145	10.65	0.29	0.0428		5.62467	2.88845	0.87169
58345	10.728	0.2911	0.0429		5.66586	2.8994	0.873727
58545	10.804	0.2921	0.0429		5.706	2.90936	0.873727
58746	10.876	0.2932	0.0429		5.74403	2.92032	0.873727
58946	10.948	0.2943	0.043		5.78205	2.93127	0.875764
59147	11.016	0.2952	0.043		5.81796	2.94024	0.875764
59347	11.086	0.2963	0.0431		5.85493	2.9512	0.8778
59547	11.156	0.2972	0.0432		5.8919	2.96016	0.879837
59748	11.236	0.2982	0.0432		5.93415	2.97012	0.879837
59948	11.31	0.2992	0.0432		5.97324	2.98008	0.879837
60149	11.386	0.3002	0.0433		6.01338	2.99004	0.881874
60349	11.454	0.3012	0.0433		6.04929	3	0.881874
60549	11.526	0.3022	0.0435		6.08731	3.00996	0.885947
60750	11.598	0.3032	0.0435		6.12534	3.01992	0.885947
60950	11.672	0.3043	0.0435		6.16442	3.03088	0.885947
61151	11.742	0.3052	0.0435		6.20139	3.03984	0.885947
61351	11.816	0.3062	0.0437		6.24047	3.0498	0.89002
61551	11.888	0.3071	0.0437		6.2785	3.05876	0.89002
61753	11.964	0.3081	0.0437		6.31864	3.06873	0.89002
61954	12.036	0.3093	0.0438		6.35666	3.08068	0.892057
62154	12.108	0.3101	0.0439		6.39469	3.08865	0.894094
62355	12.182	0.3111	0.044		6.43377	3.09861	0.89613
62555	12.254	0.312	0.0441		6.4718	3.10757	0.898167
62755	12.33	0.3132	0.044		6.51194	3.11952	0.89613
62956	12.408	0.3142	0.0441		6.55313	3.12948	0.898167
63156	12.482	0.3153	0.0441		6.59221	3.14044	0.898167
63357	12.562	0.3161	0.0441		6.63447	3.14841	0.898167
63557	12.644	0.3171	0.0442		6.67777	3.15837	0.900204
63757	12.72	0.3183	0.0443		6.71791	3.17032	0.90224
63958	12.796	0.3192	0.0443		6.75805	3.17928	0.90224
64158	12.866	0.3203	0.0444		6.79502	3.19024	0.904277
64359	12.936	0.3212	0.0444		6.83199	3.1992	0.904277
64559	13.008	0.3221	0.0444		6.87001	3.20817	0.904277
64759	13.082	0.3232	0.0445		6.9091	3.21912	0.906314
64961	13.172	0.3242	0.0446		6.95663	3.22908	0.90835
65162	13.256	0.3253	0.0446		7.00099	3.24004	0.90835
65362	13.334	0.3264	0.0446		7.04219	3.251	0.90835
65563	13.406	0.3273	0.0446		7.08021	3.25996	0.90835
65763	13.486	0.3283	0.0448		7.12246	3.26992	0.912424
65963	13.558	0.3292	0.0449		7.16049	3.27888	0.91446
66164	13.634	0.3304	0.0448		7.20063	3.29084	0.912424
66364	13.71	0.3312	0.045		7.24077	3.2988	0.916497
66565	13.79	0.3322	0.045		7.28302	3.30876	0.916497
66765	13.872	0.3333	0.045		7.32633	3.31972	0.916497
66965	13.948	0.3343	0.0451		7.36646	3.32968	0.918534
67166	14.024	0.3353	0.0451		7.4066	3.33964	0.918534
67366	14.096	0.3363	0.0453		7.44463	3.3496	0.922607
67567	14.17	0.3372	0.0452		7.48371	3.35857	0.92057
67767	14.248	0.3381	0.0453		7.52491	3.36753	0.922607
67967	14.324	0.3393	0.0453		7.56504	3.37948	0.922607
68169	14.4	0.34	0.0454		7.60518	3.38645	0.924644
68370	14.484	0.3412	0.0455		7.64955	3.39841	0.92668
68570	14.572	0.3423	0.0455		7.69602	3.40936	0.92668
68771	14.65	0.3433	0.0455		7.73722	3.41932	0.92668
68971	14.732	0.3442	0.0456		7.78052	3.42829	0.928717
69171	14.808	0.3453	0.0456		7.82066	3.43924	0.928717
69372	14.884	0.3462	0.0457		7.8608	3.44821	0.930754
69572	14.964	0.3472	0.0457		7.90305	3.45817	0.930754
69773	15.04	0.3482	0.0457		7.94319	3.46813	0.930754
69973	15.12	0.3492	0.0458		7.98544	3.47809	0.93279
70173	15.202	0.3502	0.0459		8.02875	3.48805	0.934827
70374	15.28	0.3512	0.0459		8.06994	3.49801	0.934827
70574	15.354	0.3523	0.0459		8.10903	3.50896	0.934827
70775	15.434	0.3531	0.046		8.15128	3.51693	0.936864
70975	15.512	0.3541	0.0461		8.19247	3.52689	0.9389
71175	15.588	0.3551	0.0462		8.23261	3.53685	0.940937
71377	15.67	0.356	0.0462		8.27592	3.54582	0.940937
71578	15.756	0.3571	0.0463		8.32134	3.55677	0.942974
71778	15.836	0.3582	0.0463		8.36359	3.56773	0.942974
71979	15.92	0.3592	0.0463		8.40795	3.57769	0.942974
72179	16	0.3602	0.0465		8.4502	3.58765	0.947047
72379	16.08	0.3612	0.0465		8.49245	3.59761	0.947047
72580	16.162	0.3622	0.0465		8.53576	3.60757	0.947047
72780	16.242	0.3633	0.0466		8.57801	3.61853	0.949084
72981	16.322	0.3642	0.0466		8.62026	3.62749	0.949084
73181	16.402	0.3652	0.0466		8.66251	3.63745	0.949084
73381	16.486	0.3662	0.0468		8.70688	3.64741	0.953157
73582	16.566	0.3671	0.0468		8.74913	3.65637	0.953157
73782	16.646	0.3684	0.0468		8.79138	3.66932	0.953157
73983	16.726	0.3692	0.047		8.83363	3.67729	0.95723
74183	16.804	0.3702	0.047		8.87483	3.68725	0.95723
74383	16.884	0.3711	0.047		8.91708	3.69622	0.95723
74585	16.966	0.3722	0.047		8.96038	3.70717	0.95723
74786	17.052	0.3733	0.0471		9.0058	3.71813	0.959267
74986	17.14	0.3743	0.0472		9.05228	3.72809	0.961303
75187	17.226	0.3753	0.0472		9.0977	3.73805	0.961303
75387	17.304	0.3764	0.0473		9.13889	3.749	0.96334
75587	17.386	0.3774	0.0473		9.1822	3.75896	0.96334
75788	17.462	0.3784	0.0474		9.22234	3.76892	0.965377
75988	17.542	0.3792	0.0475		9.26459	3.77689	0.967413
76189	17.622	0.3803	0.0475		9.30684	3.78785	0.967413
76389	17.704	0.3813	0.0475		9.35015	3.79781	0.967413
76589	17.788	0.3822	0.0476		9.39451	3.80677	0.96945
76790	17.868	0.3834	0.0477		9.43676	3.81873	0.971487
76990	17.948	0.3845	0.0477		9.47901	3.82968	0.971487
77191	18.024	0.3853	0.0478		9.51915	3.83765	0.973523
77391	18.102	0.3862	0.0479		9.56035	3.84661	0.97556
77591	18.184	0.3873	0.0479		9.60366	3.85757	0.97556
77793	18.266	0.3882	0.0479		9.64696	3.86653	0.97556
77994	18.344	0.3892	0.0479		9.68816	3.87649	0.97556
78194	18.424	0.3902	0.048		9.73041	3.88645	0.977597
78395	18.506	0.3911	0.0481		9.77372	3.89542	0.979633
78595	18.586	0.3923	0.0481		9.81597	3.90737	0.979633
78795	18.67	0.3931	0.0481		9.86033	3.91534	0.979633
78996	18.756	0.3942	0.0483		9.90575	3.92629	0.983707
79196	18.856	0.3952	0.0484		9.95856	3.93625	0.985743
79397	18.942	0.3962	0.0484		10.004	3.94622	0.985743
79597	19.024	0.3974	0.0485		10.0473	3.95817	0.98778
79797	19.108	0.3984	0.0485		10.0917	3.96813	0.98778
79998	19.184	0.3992	0.0485		10.1318	3.9761	0.98778
80198	19.27	0.4004	0.0486		10.1772	3.98805	0.989817
80399	19.354	0.4013	0.0487		10.2216	3.99701	0.991853
80599	19.44	0.4023	0.0487		10.267	4.00697	0.991853
80799	19.526	0.4033	0.0487		10.3124	4.01693	0.991853
81000	19.61	0.4044	0.0488		10.3568	4.02789	0.99389
81200	19.694	0.4053	0.0488		10.4011	4.03685	0.99389
81401	19.776	0.4063	0.0488		10.4445	4.04681	0.99389
81601	19.856	0.4073	0.0489		10.4867	4.05677	0.995927
81801	19.938	0.4082	0.049		10.53	4.06574	0.997963
82003	20.016	0.4092	0.049		10.5712	4.0757	0.997963
82204	20.1	0.4102	0.049		10.6156	4.08566	0.997963
82404	20.18	0.4112	0.0491		10.6578	4.09562	1
82605	20.266	0.4122	0.0492		10.7032	4.10558	1.00204
82805	20.35	0.4131	0.0492		10.7476	4.11454	1.00204
83005	20.43	0.4142	0.0493		10.7899	4.1255	1.00407
83206	20.514	0.4153	0.0493		10.8342	4.13645	1.00407
83406	20.598	0.4162	0.0494		10.8786	4.14542	1.00611
83607	20.684	0.4171	0.0495		10.924	4.15438	1.00815
83807	20.778	0.4181	0.0495		10.9736	4.16434	1.00815
84007	20.872	0.4193	0.0496		11.0233	4.17629	1.01018
84208	20.956	0.4202	0.0496		11.0677	4.18526	1.01018
84408	21.048	0.4214	0.0496		11.1162	4.19721	1.01018
84609	21.134	0.4223	0.0497		11.1617	4.20618	1.01222
84809	21.22	0.4234	0.0497		11.2071	4.21713	1.01222
85009	21.306	0.4242	0.0498		11.2525	4.2251	1.01426
85211	21.392	0.4253	0.0499		11.2979	4.23606	1.01629
85412	21.476	0.4263	0.0499		11.3423	4.24602	1.01629
85612	21.558	0.4272	0.05		11.3856	4.25498	1.01833
85813	21.638	0.4282	0.0501		11.4278	4.26494	1.02037
86013	21.724	0.4292	0.0501		11.4733	4.2749	1.02037
86213	21.808	0.4302	0.0501		11.5176	4.28486	1.02037
86414	21.892	0.4311	0.0501		11.562	4.29382	1.02037
86614	21.994	0.4323	0.0501		11.6159	4.30578	1.02037
86815	22.088	0.4335	0.0503		11.6655	4.31773	1.02444
87015	22.176	0.4344	0.0502		11.712	4.32669	1.0224
87215	22.258	0.4354	0.0503		11.7553	4.33665	1.02444
87416	22.338	0.4363	0.0503		11.7975	4.34562	1.02444
87616	22.422	0.4373	0.0503		11.8419	4.35558	1.02444
87817	22.508	0.4382	0.0505		11.8873	4.36454	1.02851
88017	22.602	0.4394	0.0505		11.937	4.37649	1.02851
88217	22.69	0.4404	0.0506		11.9834	4.38645	1.03055
88419	22.776	0.4414	0.0506		12.0289	4.39641	1.03055
88620	22.864	0.4423	0.0506		12.0753	4.40538	1.03055
88820	22.95	0.4434	0.0507		12.1208	4.41633	1.03259
89021	23.028	0.4443	0.0507		12.162	4.4253	1.03259
89221	23.11	0.4454	0.0507		12.2053	4.43625	1.03259
89421	23.192	0.4462	0.0508		12.2486	4.44422	1.03462
89622	23.278	0.4471	0.0509		12.294	4.45319	1.03666
89822	23.366	0.4481	0.0509		12.3405	4.46315	1.03666
90023	23.452	0.4491	0.051		12.3859	4.47311	1.0387
90223	23.538	0.4502	0.051		12.4313	4.48406	1.0387
90423	23.622	0.451	0.051		12.4757	4.49203	1.0387
90624	23.712	0.4522	0.0511		12.5232	4.50398	1.04073
90824	23.796	0.4531	0.051		12.5676	4.51295	1.0387
91025	23.884	0.4541	0.0511		12.614	4.52291	1.04073
91225	23.968	0.455	0.0512		12.6584	4.53187	1.04277
91425	24.052	0.456	0.0512		12.7028	4.54183	1.04277
91627	24.134	0.457	0.0512		12.7461	4.55179	1.04277
91828	24.222	0.4581	0.0513		12.7926	4.56275	1.04481
92028	24.318	0.4592	0.0513		12.8433	4.57371	1.04481
92229	24.416	0.4601	0.0514		12.895	4.58267	1.04684
92429	24.504	0.4612	0.0514		12.9415	4.59363	1.04684
92629	24.59	0.4623	0.0514		12.9869	4.60458	1.04684
92830	24.678	0.4633	0.0514		13.0334	4.61454	1.04684
93030	24.764	0.4642	0.0515		13.0788	4.62351	1.04888
93231	24.848	0.4652	0.0515		13.1232	4.63347	1.04888
93431	24.934	0.4661	0.0516		13.1686	4.64243	1.05092
93631	25.022	0.4671	0.0517		13.2151	4.65239	1.05295
93832	25.108	0.468	0.0517		13.2605	4.66135	1.05295
94032	25.21	0.4691	0.0517		13.3144	4.67231	1.05295
94233	25.306	0.4703	0.0519		13.3651	4.68426	1.05703
94433	25.398	0.4713	0.0519		13.4136	4.69422	1.05703
94633	25.484	0.4723	0.0518		13.4591	4.70418	1.05499
94835	25.566	0.4734	0.0518		13.5024	4.71514	1.05499
95036	25.65	0.4742	0.0518		13.5467	4.72311	1.05499
95236	25.744	0.4753	0.0518		13.5964	4.73406	1.05499
95437	25.834	0.4762	0.0518		13.6439	4.74303	1.05499
95637	25.918	0.4771	0.0519		13.6883	4.75199	1.05703
95837	26.004	0.4782	0.052		13.7337	4.76295	1.05906
96038	26.092	0.4791	0.0519		13.7802	4.77191	1.05703
96238	26.18	0.4801	0.052		13.8266	4.78187	1.05906
96439	26.268	0.481	0.052		13.8731	4.79084	1.05906
96639	26.354	0.4821	0.0521		13.9185	4.80179	1.0611
96839	26.45	0.4832	0.0521		13.9692	4.81275	1.0611
97040	26.546	0.4841	0.0521		14.0199	4.82171	1.0611
97240	26.636	0.4852	0.0521		14.0675	4.83267	1.0611
97441	26.728	0.4862	0.0521		14.1161	4.84263	1.0611
97641	26.816	0.4872	0.0521		14.1625	4.85259	1.0611
97841	26.904	0.4882	0.0521		14.209	4.86255	1.0611
98043	26.996	0.4891	0.0521		14.2576	4.87151	1.0611
98244	27.086	0.4901	0.0521		14.3051	4.88147	1.0611
98444	27.176	0.4912	0.0521		14.3527	4.89243	1.0611
98645	27.274	0.4921	0.0522		14.4044	4.90139	1.06314
98845	27.368	0.4932	0.0522		14.4541	4.91235	1.06314
99045	27.458	0.4941	0.0523		14.5016	4.92131	1.06517
99246	27.546	0.495	0.0523		14.5481	4.93028	1.06517
99446	27.638	0.4962	0.0523		14.5967	4.94223	1.06517
99647	27.734	0.4971	0.0523		14.6474	4.9512	1.06517
99847	27.832	0.4984	0.0523		14.6991	4.96414	1.06517
100047	27.916	0.4993	0.0523		14.7435	4.97311	1.06517
100248	28.008	0.5002	0.0524		14.7921	4.98207	1.06721
100448	28.098	0.5011	0.0524		14.8396	4.99104	1.06721
100649	28.186	0.5021	0.0523		14.8861	5.001	1.06517
100849	28.276	0.5031	0.0524		14.9336	5.01096	1.06721
101049	28.366	0.5041	0.0525		14.9812	5.02092	1.06925
101250	28.468	0.5053	0.0525		15.035	5.03287	1.06925
101450	28.56	0.5063	0.0525		15.0836	5.04283	1.06925
101651	28.65	0.5073	0.0525		15.1311	5.05279	1.06925
101851	28.738	0.5083	0.0525		15.1776	5.06275	1.06925
102051	28.832	0.5092	0.0525		15.2273	5.07171	1.06925
102253	28.924	0.5102	0.0526		15.2759	5.08167	1.07128
102454	29.01	0.5112	0.0527		15.3213	5.09163	1.07332
102654	29.1	0.5122	0.0526		15.3688	5.10159	1.07128
102855	29.196	0.5133	0.0527		15.4195	5.11255	1.07332
103055	29.288	0.5143	0.0527		15.4681	5.12251	1.07332
103255	29.378	0.5153	0.0527		15.5156	5.13247	1.07332
103456	29.47	0.5163	0.0527		15.5642	5.14243	1.07332
103656	29.56	0.5172	0.0528		15.6117	5.15139	1.07536
103857	29.648	0.5183	0.0528		15.6582	5.16235	1.07536
104057	29.738	0.5192	0.0528		15.7058	5.17131	1.07536
104257	29.824	0.5201	0.0529		15.7512	5.18028	1.07739
104458	29.908	0.5212	0.0529		15.7955	5.19124	1.07739
104658	29.992	0.5222	0.053		15.8399	5.2012	1.07943
104859	30.084	0.5232	0.0529		15.8885	5.21116	1.07739
105059	30.176	0.5241	0.0529		15.9371	5.22012	1.07739
105259	30.274	0.5253	0.053		15.9888	5.23207	1.07943
105461	30.37	0.5263	0.053		16.0395	5.24203	1.07943
105662	30.462	0.5273	0.0531		16.0881	5.25199	1.08147
105862	30.556	0.5284	0.0531		16.1378	5.26295	1.08147
106063	30.646	0.5292	0.0531		16.1853	5.27092	1.08147
106263	30.744	0.5303	0.0531		16.2371	5.28187	1.08147
106463	30.836	0.5312	0.0531		16.2857	5.29084	1.08147
106664	30.924	0.5323	0.0532		16.3321	5.30179	1.0835
106864	31.008	0.5332	0.0532		16.3765	5.31076	1.0835
107065	31.096	0.5343	0.0532		16.423	5.32171	1.0835
107265	31.184	0.5353	0.0532		16.4694	5.33167	1.0835
107465	31.274	0.5362	0.0532		16.517	5.34064	1.0835
107666	31.364	0.5373	0.0534		16.5645	5.35159	1.08758
107866	31.456	0.5383	0.0533		16.6131	5.36155	1.08554
108067	31.548	0.5392	0.0533		16.6617	5.37052	1.08554
108267	31.648	0.5403	0.0534		16.7145	5.38147	1.08758
108467	31.738	0.5413	0.0534		16.762	5.39143	1.08758
108669	31.828	0.5422	0.0534		16.8096	5.4004	1.08758
108870	31.92	0.5432	0.0534		16.8582	5.41036	1.08758
109070	32.016	0.5442	0.0534		16.9089	5.42032	1.08758
109271	32.104	0.5452	0.0534		16.9553	5.43028	1.08758
109471	32.2	0.5463	0.0535		17.006	5.44124	1.08961
109671	32.292	0.5473	0.0535		17.0546	5.4512	1.08961
109872	32.388	0.5483	0.0535		17.1053	5.46116	1.08961
110072	32.476	0.5493	0.0535		17.1518	5.47112	1.08961
110273	32.57	0.5503	0.0536		17.2014	5.48108	1.09165
110473	32.668	0.5513	0.0536		17.2532	5.49104	1.09165
110673	32.76	0.5523	0.0537		17.3018	5.501	1.09369
110874	32.85	0.5533	0.0538		17.3493	5.51096	1.09572
111074	32.934	0.5543	0.0537		17.3937	5.52092	1.09369
111275	33.022	0.5553	0.0536		17.4402	5.53088	1.09165
111475	33.11	0.5563	0.0536		17.4866	5.54084	1.09165
111675	33.208	0.5572	0.0537		17.5384	5.5498	1.09369
111877	33.33	0.5584	0.0537		17.6028	5.56175	1.09369
112078	33.446	0.5597	0.0537		17.6641	5.5747	1.09369
112278	33.54	0.5607	0.0537		17.7137	5.58466	1.09369
112479	33.614	0.5618	0.0538		17.7528	5.59562	1.09572
112679	33.69	0.5625	0.0538		17.793	5.60259	1.09572
112879	33.774	0.5634	0.0539		17.8373	5.61155	1.09776
113080	33.866	0.5644	0.0538		17.8859	5.62151	1.09572
113280	33.954	0.5653	0.0539		17.9324	5.63048	1.09776
113481	34.044	0.5662	0.0539		17.9799	5.63944	1.09776
113681	34.134	0.5673	0.0539		18.0275	5.6504	1.09776
113881	34.23	0.5684	0.0539		18.0782	5.66135	1.09776
114082	34.322	0.5694	0.054		18.1267	5.67131	1.0998
114282	34.416	0.5703	0.054		18.1764	5.68028	1.0998
114483	34.51	0.5713	0.054		18.226	5.69024	1.0998
114683	34.6	0.5723	0.0541		18.2736	5.7002	1.10183
114883	34.686	0.5732	0.054		18.319	5.70916	1.0998
115085	34.782	0.5744	0.0541		18.3697	5.72112	1.10183
115286	34.866	0.5754	0.054		18.414	5.73108	1.0998
115486	34.958	0.5764	0.0541		18.4626	5.74104	1.10183
115687	35.048	0.5772	0.0541		18.5102	5.749	1.10183
115887	35.142	0.5782	0.0541		18.5598	5.75896	1.10183
116087	35.24	0.5792	0.0542		18.6116	5.76892	1.10387
116288	35.332	0.5803	0.0542		18.6602	5.77988	1.10387
116488	35.424	0.5812	0.0542		18.7087	5.78884	1.10387
116689	35.516	0.5822	0.0541		18.7573	5.7988	1.10183
116889	35.602	0.5833	0.0542		18.8028	5.80976	1.10387
117089	35.702	0.5842	0.0542		18.8556	5.81873	1.10387
117290	35.792	0.5851	0.0543		18.9031	5.82769	1.10591
117490	35.91	0.5865	0.0542		18.9654	5.84163	1.10387
117691	36.022	0.5876	0.0543		19.0246	5.85259	1.10591
117891	36.112	0.5887	0.0543		19.0721	5.86355	1.10591
118091	36.194	0.5896	0.0543		19.1154	5.87251	1.10591
118293	36.276	0.5903	0.0543		19.1587	5.87948	1.10591
118494	36.366	0.5914	0.0543		19.2063	5.89044	1.10591
118694	36.46	0.5924	0.0543		19.2559	5.9004	1.10591
118895	36.548	0.5933	0.0544		19.3024	5.90936	1.10794
119095	36.634	0.5943	0.0544		19.3478	5.91932	1.10794
119295	36.73	0.5954	0.0544		19.3985	5.93028	1.10794
119496	36.822	0.5963	0.0545		19.4471	5.93924	1.10998
119696	36.91	0.5973	0.0544		19.4936	5.9492	1.10794
119897	37.014	0.5983	0.0545		19.5485	5.95916	1.10998
120097	37.108	0.5993	0.0545		19.5981	5.96912	1.10998
120297	37.2	0.6004	0.0545		19.6467	5.98008	1.10998
120498	37.292	0.6014	0.0545		19.6953	5.99004	1.10998
120698	37.382	0.6024	0.0545		19.7428	6	1.10998
120899	37.472	0.6033	0.0545		19.7904	6.00896	1.10998
121099	37.564	0.6042	0.0545		19.839	6.01793	1.10998
121299	37.662	0.6052	0.0545		19.8907	6.02789	1.10998
121500	37.766	0.6063	0.0545		19.9456	6.03884	1.10998
121700	37.866	0.6075	0.0545		19.9985	6.0508	1.10998
121901	37.958	0.6084	0.0546		20.047	6.05976	1.11202
122101	38.05	0.6094	0.0546		20.0956	6.06972	1.11202
122301	38.138	0.6102	0.0545		20.1421	6.07769	1.10998
122503	38.234	0.6113	0.0545		20.1928	6.08865	1.10998
122704	38.322	0.6124	0.0547		20.2393	6.0996	1.11405
122904	38.414	0.6133	0.0547		20.2879	6.10857	1.11405
123105	38.5	0.6142	0.0547		20.3333	6.11753	1.11405
123305	38.59	0.6152	0.0547		20.3808	6.12749	1.11405
123505	38.676	0.6162	0.0547		20.4263	6.13745	1.11405
123706	38.77	0.6171	0.0547		20.4759	6.14641	1.11405
123906	38.87	0.6181	0.0547		20.5287	6.15637	1.11405
124107	38.972	0.6193	0.0547		20.5826	6.16833	1.11405
124307	39.08	0.6203	0.0547		20.6396	6.17829	1.11405
124507	39.18	0.6215	0.0547		20.6924	6.19024	1.11405
124708	39.268	0.6224	0.0547		20.7389	6.1992	1.11405
124908	39.358	0.6234	0.0547		20.7864	6.20916	1.11405
125109	39.454	0.6243	0.0548		20.8371	6.21813	1.11609
125309	39.554	0.6253	0.0548		20.89	6.22809	1.11609
125509	39.65	0.6264	0.0548		20.9407	6.23904	1.11609
125711	39.744	0.6275	0.0548		20.9903	6.25	1.11609
125912	39.832	0.6284	0.0548		21.0368	6.25896	1.11609
126112	39.92	0.6293	0.0549		21.0833	6.26793	1.11813
126313	40.014	0.6302	0.0549		21.1329	6.27689	1.11813
126513	40.114	0.6312	0.0549		21.1857	6.28685	1.11813
126713	40.212	0.6322	0.0549		21.2375	6.29681	1.11813
126914	40.31	0.6332	0.0549		21.2892	6.30677	1.11813
127114	40.408	0.6344	0.0549		21.341	6.31873	1.11813
127315	40.502	0.6354	0.0549		21.3906	6.32869	1.11813
127515	40.594	0.6363	0.0549		21.4392	6.33765	1.11813
127715	40.692	0.6372	0.0549		21.491	6.34661	1.11813
127916	40.792	0.6382	0.0549		21.5438	6.35657	1.11813
128116	40.884	0.6393	0.0549		21.5924	6.36753	1.11813
128317	40.98	0.6403	0.0549		21.6431	6.37749	1.11813
128517	41.072	0.6413	0.0549		21.6917	6.38745	1.11813
128717	41.164	0.6423	0.0548		21.7403	6.39741	1.11609
128919	41.258	0.6431	0.0549		21.7899	6.40538	1.11813
129120	41.354	0.6442	0.0549		21.8406	6.41633	1.11813
129320	41.466	0.6454	0.0549		21.8998	6.42829	1.11813
129521	41.572	0.6465	0.0549		21.9557	6.43924	1.11813
129721	41.662	0.6476	0.0549		22.0033	6.4502	1.11813
129921	41.756	0.6484	0.055		22.0529	6.45817	1.12016
130122	41.844	0.6494	0.0549		22.0994	6.46813	1.11813
130322	41.936	0.6503	0.0549		22.148	6.47709	1.11813
130523	42.028	0.6513	0.0549		22.1966	6.48705	1.11813
130723	42.126	0.6523	0.0549		22.2483	6.49701	1.11813
130923	42.222	0.6533	0.0549		22.299	6.50697	1.11813
131124	42.312	0.6544	0.0549		22.3466	6.51793	1.11813
131324	42.394	0.6555	0.0549		22.3899	6.52888	1.11813
131525	42.484	0.6563	0.055		22.4374	6.53685	1.12016
131725	42.584	0.6573	0.0549		22.4902	6.54681	1.11813
131925	42.682	0.6583	0.0549		22.542	6.55677	1.11813
132127	42.782	0.6593	0.055		22.5948	6.56673	1.12016
132328	42.876	0.6605	0.0549		22.6444	6.57869	1.11813
132528	42.964	0.6614	0.055		22.6909	6.58765	1.12016
132729	43.056	0.6623	0.0549		22.7395	6.59661	1.11813
132929	43.148	0.6633	0.0549		22.7881	6.60657	1.11813
133129	43.242	0.6643	0.0549		22.8377	6.61653	1.11813
133330	43.336	0.6652	0.0549		22.8874	6.6255	1.11813
133530	43.426	0.6662	0.0549		22.9349	6.63546	1.11813
133731	43.522	0.6671	0.0549		22.9856	6.64442	1.11813
133931	43.614	0.6682	0.0548		23.0342	6.65538	1.11609
134131	43.706	0.6692	0.0549		23.0828	6.66534	1.11813
134332	43.802	0.6701	0.0549		23.1335	6.6743	1.11813
134532	43.906	0.6712	0.0549		23.1884	6.68526	1.11813
134733	44.016	0.6722	0.0549		23.2465	6.69522	1.11813
134933	44.124	0.6734	0.0549		23.3035	6.70717	1.11813
135133	44.226	0.6744	0.0549		23.3574	6.71713	1.11813
135335	44.31	0.6755	0.0549		23.4018	6.72809	1.11813
135536	44.404	0.6763	0.0549		23.4514	6.73606	1.11813
135736	44.502	0.6775	0.0549		23.5032	6.74801	1.11813
135937	44.596	0.6784	0.055		23.5528	6.75697	1.12016
136137	44.684	0.6794	0.055		23.5993	6.76693	1.12016
136337	44.778	0.6804	0.0549		23.6489	6.77689	1.11813
136538	44.868	0.6813	0.055		23.6965	6.78586	1.12016
136738	44.96	0.6823	0.055		23.7451	6.79582	1.12016
136939	45.056	0.6832	0.055		23.7958	6.80478	1.12016
137139	45.154	0.6843	0.0549		23.8475	6.81574	1.11813
137339	45.248	0.6852	0.055		23.8972	6.8247	1.12016
137540	45.342	0.6862	0.055		23.9468	6.83466	1.12016
137740	45.436	0.6873	0.055		23.9965	6.84562	1.12016
137941	45.528	0.6882	0.055		24.0451	6.85458	1.12016
138141	45.616	0.6892	0.055		24.0915	6.86454	1.12016
138341	45.712	0.6902	0.055		24.1422	6.8745	1.12016
138543	45.808	0.6911	0.055		24.1929	6.88347	1.12016
138744	45.904	0.6922	0.055		24.2436	6.89442	1.12016
138944	46.008	0.6932	0.055		24.2986	6.90438	1.12016
139145	46.108	0.6942	0.0551		24.3514	6.91434	1.1222
139345	46.206	0.6953	0.0551		24.4031	6.9253	1.1222
139545	46.304	0.6962	0.055		24.4549	6.93426	1.12016
139746	46.41	0.6973	0.0551		24.5109	6.94522	1.1222
139946	46.506	0.6984	0.0552		24.5616	6.95618	1.12424
140147	46.602	0.6993	0.0552		24.6123	6.96514	1.12424
140347	46.692	0.7004	0.0553		24.6598	6.9761	1.12627
140547	46.788	0.7013	0.0554		24.7105	6.98506	1.12831
140748	46.886	0.7022	0.0553		24.7623	6.99402	1.12627
140948	47	0.7034	0.0553		24.8225	7.00598	1.12627
141149	47.104	0.7045	0.0554		24.8774	7.01693	1.12831
141349	47.202	0.7055	0.0554		24.9292	7.02689	1.12831
141549	47.302	0.7066	0.0554		24.982	7.03785	1.12831
141750	47.398	0.7075	0.0554		25.0327	7.04681	1.12831
141950	47.492	0.7085	0.0554		25.0823	7.05677	1.12831
142151	47.586	0.7094	0.0554		25.132	7.06574	1.12831
142351	47.682	0.7104	0.0555		25.1827	7.0757	1.13035
142551	47.778	0.7113	0.0554		25.2334	7.08466	1.12831
142753	47.872	0.7124	0.0554		25.283	7.09562	1.12831
142954	47.966	0.7135	0.0556		25.3327	7.10657	1.13238
143154	48.05	0.7144	0.0555		25.377	7.11554	1.13035
143355	48.14	0.7153	0.0555		25.4245	7.1245	1.13035
143555	48.232	0.7164	0.0555		25.4731	7.13546	1.13035
143755	48.328	0.7173	0.0555		25.5238	7.14442	1.13035
143956	48.426	0.7183	0.0555		25.5756	7.15438	1.13035
144156	48.518	0.7194	0.0556		25.6242	7.16534	1.13238
144357	48.61	0.7203	0.0556		25.6728	7.1743	1.13238
144557	48.7	0.7213	0.0556		25.7203	7.18426	1.13238
144757	48.794	0.7222	0.0556		25.7699	7.19323	1.13238
144958	48.886	0.7233	0.0556		25.8185	7.20418	1.13238
145158	48.99	0.7243	0.0556		25.8735	7.21414	1.13238
145359	49.084	0.7253	0.0556		25.9231	7.2241	1.13238
145559	49.18	0.7264	0.0556		25.9738	7.23506	1.13238
145759	49.276	0.7272	0.0556		26.0245	7.24303	1.13238
145961	49.368	0.7284	0.0556		26.0731	7.25498	1.13238
146162	49.468	0.7293	0.0556		26.1259	7.26394	1.13238
146362	49.564	0.7305	0.0556		26.1766	7.2759	1.13238
146563	49.66	0.7314	0.0556		26.2273	7.28486	1.13238
146763	49.758	0.7323	0.0556		26.2791	7.29382	1.13238
146963	49.846	0.7333	0.0557		26.3255	7.30378	1.13442
147164	49.936	0.7343	0.0556		26.3731	7.31375	1.13238
147364	50.038	0.7352	0.0556		26.427	7.32271	1.13238
147565	50.14	0.7362	0.0557		26.4808	7.33267	1.13442
147765	50.24	0.7372	0.0556		26.5336	7.34263	1.13238
147965	50.334	0.7383	0.0557		26.5833	7.35359	1.13442
148166	50.422	0.7395	0.0674		26.6298	7.36554	1.37271
148366	50.506	0.7404	0.0674		26.6741	7.3745	1.37271
148567	50.592	0.7414	0.0674		26.7195	7.38446	1.37271
148767	50.684	0.7423	0.0673		26.7681	7.39343	1.37067
148967	50.774	0.7433	0.0674		26.8157	7.40339	1.37271
149169	50.864	0.7442	0.0674		26.8632	7.41235	1.37271
149370	50.958	0.7452	0.0674		26.9128	7.42231	1.37271
149570	51.05	0.7462	0.0674		26.9614	7.43227	1.37271
149771	51.144	0.7472	0.0674		27.0111	7.44223	1.37271
149971	51.236	0.7482	0.0674		27.0597	7.45219	1.37271
150171	51.338	0.7492	0.0673		27.1135	7.46215	1.37067
150372	51.446	0.7502	0.0673		27.1706	7.47211	1.37067
150572	51.544	0.7514	0.0674		27.2223	7.48406	1.37271
150773	51.636	0.7524	0.0674		27.2709	7.49402	1.37271
150973	51.734	0.7535	0.0674		27.3227	7.50498	1.37271
151173	51.824	0.7543	0.0674		27.3702	7.51295	1.37271
151374	51.92	0.7553	0.0674		27.4209	7.52291	1.37271
151574	52.016	0.7563	0.0672		27.4716	7.53287	1.36864
151775	52.128	0.7573	0.0674		27.5308	7.54283	1.37271
151975	52.228	0.7585	0.0674		27.5836	7.55478	1.37271
152175	52.316	0.7596	0.0674		27.63	7.56574	1.37271
152377	52.406	0.7607	0.0674		27.6776	7.57669	1.37271
152578	52.496	0.7614	0.0674		27.7251	7.58367	1.37271
152778	52.588	0.7624	0.0673		27.7737	7.59363	1.37067
152979	52.684	0.7634	0.0674		27.8244	7.60359	1.37271
153179	52.778	0.7644	0.0674		27.874	7.61355	1.37271
153379	52.87	0.7654	0.0674		27.9226	7.62351	1.37271
153580	52.962	0.7664	0.0673		27.9712	7.63347	1.37067
153780	53.052	0.7673	0.0674		28.0188	7.64243	1.37271
153981	53.144	0.7683	0.0674		28.0673	7.65239	1.37271
154181	53.24	0.7693	0.0673		28.118	7.66235	1.37067
154381	53.332	0.7703	0.0674		28.1666	7.67231	1.37271
154582	53.426	0.7713	0.0674		28.2163	7.68227	1.37271
154782	53.514	0.7723	0.0674		28.2628	7.69223	1.37271
154983	53.608	0.7734	0.0674		28.3124	7.70319	1.37271
155183	53.696	0.7743	0.0674		28.3589	7.71215	1.37271
155383	53.792	0.7751	0.0674		28.4096	7.72012	1.37271
155585	53.888	0.7762	0.0674		28.4603	7.73108	1.37271
155786	53.984	0.7772	0.0674		28.511	7.74104	1.37271
155986	54.086	0.7784	0.0673		28.5649	7.75299	1.37067
156187	54.182	0.7793	0.0674		28.6156	7.76195	1.37271
156387	54.274	0.7804	0.0674		28.6641	7.77291	1.37271
156587	54.364	0.7814	0.0674		28.7117	7.78287	1.37271
156788	54.458	0.7823	0.0674		28.7613	7.79183	1.37271
156988	54.554	0.7831	0.0674		28.812	7.7998	1.37271
157189	54.646	0.7842	0.0674		28.8606	7.81076	1.37271
157389	54.758	0.7853	0.0674		28.9198	7.82171	1.37271
157589	54.876	0.7866	0.0674		28.9821	7.83466	1.37271
157790	54.968	0.7878	0.0674		29.0307	7.84661	1.37271
157990	55.054	0.7885	0.0674		29.0761	7.85359	1.37271
158191	55.14	0.7895	0.0674		29.1215	7.86355	1.37271
158391	55.236	0.7905	0.0674		29.1722	7.87351	1.37271
158591	55.322	0.7915	0.0673		29.2176	7.88347	1.37067
158793	55.41	0.7925	0.0674		29.2641	7.89343	1.37271
158994	55.5	0.7935	0.0674		29.3116	7.90339	1.37271
159194	55.586	0.7945	0.0673		29.3571	7.91335	1.37067
159395	55.678	0.7953	0.0674		29.4056	7.92131	1.37271
159595	55.778	0.7964	0.0673		29.4585	7.93227	1.37067
159795	55.87	0.7972	0.0674		29.5071	7.94024	1.37271
159996	55.966	0.7984	0.0674		29.5578	7.95219	1.37271
160196	56.064	0.7994	0.0674		29.6095	7.96215	1.37271
160397	56.152	0.8004	0.0674		29.656	7.97211	1.37271
160597	56.24	0.8014	0.0674		29.7025	7.98207	1.37271
160797	56.33	0.8024	0.0674		29.75	7.99203	1.37271
160998	56.424	0.8033	0.0674		29.7996	8.001	1.37271
161198	56.514	0.8042	0.0674		29.8472	8.00996	1.37271
161399	56.614	0.8053	0.0673		29.9	8.02092	1.37067
161599	56.722	0.8064	0.0674		29.957	8.03187	1.37271
161799	56.824	0.8075	0.0673		30.0109	8.04283	1.37067
162000	56.918	0.8085	0.0674		30.0605	8.05279	1.37271
162200	57.008	0.8095	0.0674		30.1081	8.06275	1.37271
162401	57.1	0.8104	0.0674		30.1567	8.07171	1.37271
162601	57.19	0.8115	0.0674		30.2042	8.08267	1.37271
162801	57.278	0.8125	0.0674		30.2507	8.09263	1.37271
163003	57.372	0.8134	0.0673		30.3003	8.10159	1.37067
163204	57.458	0.8144	0.0674		30.3457	8.11155	1.37271
163404	57.546	0.8153	0.0674		30.3922	8.12052	1.37271
163605	57.644	0.8163	0.0674		30.444	8.13048	1.37271
163805	57.736	0.8173	0.0674		30.4926	8.14044	1.37271
164005	57.826	0.8184	0.0674		30.5401	8.15139	1.37271
164206	57.918	0.8193	0.0674		30.5887	8.16036	1.37271
164406	58.004	0.8203	0.0674		30.6341	8.17032	1.37271
164607	58.1	0.8213	0.0674		30.6848	8.18028	1.37271
164807	58.208	0.8224	0.0674		30.7418	8.19124	1.37271
165007	58.306	0.8234	0.0674		30.7936	8.2012	1.37271
165208	58.4	0.8244	0.0674		30.8432	8.21116	1.37271
165408	58.49	0.8254	0.0674		30.8908	8.22112	1.37271
165609	58.58	0.8264	0.0675		30.9383	8.23108	1.37475
165809	58.668	0.8274	0.0674		30.9848	8.24104	1.37271
166009	58.758	0.8281	0.0674		31.0323	8.24801	1.37271
166211	58.872	0.8295	0.0674		31.0925	8.26195	1.37271
166412	58.972	0.8306	0.0674		31.1453	8.27291	1.37271
166612	59.068	0.8315	0.0674		31.196	8.28187	1.37271
166813	59.16	0.8325	0.0674		31.2446	8.29183	1.37271
167013	59.25	0.8335	0.0675		31.2922	8.30179	1.37475
167213	59.338	0.8346	0.0675		31.3386	8.31275	1.37475
167414	59.434	0.8355	0.0675		31.3893	8.32171	1.37475
167614	59.522	0.8365	0.0676		31.4358	8.33167	1.37678
167815	59.614	0.8374	0.0676		31.4844	8.34064	1.37678
168015	59.702	0.8384	0.0676		31.5309	8.3506	1.37678
168215	59.788	0.8394	0.0674		31.5763	8.36056	1.37271
168416	59.874	0.8404	0.0675		31.6217	8.37052	1.37475
168616	59.962	0.8414	0.0675		31.6682	8.38048	1.37475
168817	60.064	0.8423	0.0674		31.7221	8.38944	1.37271
169017	60.182	0.8435	0.0675		31.7844	8.40139	1.37475
169217	60.286	0.8446	0.0675		31.8393	8.41235	1.37475
169419	60.386	0.8457	0.0674		31.8921	8.42331	1.37271
169620	60.474	0.8467	0.0675		31.9386	8.43327	1.37475
169820	60.56	0.8477	0.0675		31.984	8.44323	1.37475
170021	60.638	0.8486	0.0675		32.0252	8.45219	1.37475
170221	60.732	0.8495	0.0675		32.0749	8.46116	1.37475
170421	60.82	0.8506	0.0675		32.1213	8.47211	1.37475
170622	60.906	0.8514	0.0675		32.1668	8.48008	1.37475
170822	60.998	0.8525	0.0674		32.2153	8.49104	1.37271
171023	61.082	0.8535	0.0675		32.2597	8.501	1.37475
171223	61.164	0.8544	0.0675		32.303	8.50996	1.37475
171423	61.254	0.8553	0.0675		32.3505	8.51892	1.37475
171624	61.344	0.8564	0.0675		32.3981	8.52988	1.37475
171824	61.434	0.8573	0.0675		32.4456	8.53884	1.37475
172025	61.524	0.8583	0.0675		32.4931	8.5488	1.37475
172225	61.622	0.8592	0.0675		32.5449	8.55777	1.37475
172425	61.712	0.8604	0.0675		32.5924	8.56972	1.37475
172627	61.804	0.8614	0.0675		32.641	8.57968	1.37475
172828	61.892	0.8623	0.0675		32.6875	8.58865	1.37475
173028	61.984	0.8634	0.0675		32.7361	8.5996	1.37475
173229	62.072	0.8643	0.0675		32.7826	8.60857	1.37475
173429	62.162	0.8653	0.0675		32.8301	8.61853	1.37475
173629	62.264	0.8664	0.0675		32.884	8.62948	1.37475
173830	62.352	0.8674	0.0675		32.9304	8.63944	1.37475
174030	62.444	0.8685	0.0675		32.979	8.6504	1.37475
174231	62.538	0.8693	0.0676		33.0287	8.65837	1.37678
174431	62.624	0.8703	0.0675		33.0741	8.66833	1.37475
174631	62.718	0.8714	0.0675		33.1237	8.67928	1.37475
174832	62.808	0.8722	0.0675		33.1713	8.68725	1.37475
175032	62.902	0.8734	0.0675		33.2209	8.6992	1.37475
175233	62.996	0.8744	0.0675		33.2706	8.70916	1.37475
175433	63.08	0.8754	0.0675		33.3149	8.71912	1.37475
175633	63.174	0.8763	0.0675		33.3646	8.72809	1.37475
175835	63.27	0.8773	0.0675		33.4153	8.73805	1.37475
176036	63.356	0.8784	0.0675		33.4607	8.749	1.37475
176236	63.44	0.8793	0.0675		33.5051	8.75797	1.37475
176437	63.528	0.8802	0.0675		33.5515	8.76693	1.37475
176637	63.614	0.8813	0.0675		33.5969	8.77789	1.37475
176837	63.702	0.8821	0.0674		33.6434	8.78586	1.37271
177038	63.79	0.8832	0.0675		33.6899	8.79681	1.37475
177238	63.892	0.8841	0.0674		33.7438	8.80578	1.37271
177439	63.994	0.8852	0.0674		33.7976	8.81673	1.37271
177639	64.094	0.8864	0.0674		33.8505	8.82869	1.37271
177839	64.19	0.8875	0.0674		33.9012	8.83964	1.37271
178040	64.282	0.8884	0.0675		33.9497	8.84861	1.37475
178240	64.372	0.8894	0.0674		33.9973	8.85857	1.37271
178441	64.458	0.8904	0.0675		34.0427	8.86853	1.37475
178641	64.556	0.8914	0.0675		34.0945	8.87849	1.37475
178841	64.66	0.8926	0.0675		34.1494	8.89044	1.37475
179043	64.75	0.8936	0.0674		34.1969	8.9004	1.37271
179244	64.84	0.8945	0.0674		34.2444	8.90936	1.37271
179444	64.922	0.8955	0.0675		34.2878	8.91932	1.37475
179645	65.008	0.8965	0.0674		34.3332	8.92928	1.37271
179845	65.102	0.8974	0.0675		34.3828	8.93825	1.37475
180045	65.196	0.8984	0.0676		34.4325	8.94821	1.37678
180246	65.288	0.8994	0.0676		34.4811	8.95817	1.37678
180446	65.38	0.9004	0.0676		34.5296	8.96813	1.37678
180647	65.468	0.9014	0.0674		34.5761	8.97809	1.37271
180847	65.554	0.9024	0.0675		34.6215	8.98805	1.37475
181047	65.638	0.9033	0.0675		34.6659	8.99701	1.37475
181248	65.73	0.9044	0.0674		34.7145	9.00797	1.37271
181448	65.832	0.9054	0.0675		34.7684	9.01793	1.37475
181649	65.926	0.9065	0.0674		34.818	9.02888	1.37271
181849	66.016	0.9075	0.0674		34.8655	9.03884	1.37271
182049	66.106	0.9085	0.0675		34.9131	9.0488	1.37475
182250	66.192	0.9095	0.0675		34.9585	9.05876	1.37475
182450	66.284	0.9104	0.0676		35.0071	9.06773	1.37678
182651	66.372	0.9114	0.0676		35.0536	9.07769	1.37678
182851	66.462	0.9124	0.0674		35.1011	9.08765	1.37271
183051	66.552	0.9135	0.0675		35.1486	9.09861	1.37475
183253	66.642	0.9144	0.0675		35.1961	9.10757	1.37475
183454	66.728	0.9154	0.0673		35.2416	9.11753	1.37067
183654	66.812	0.9164	0.0673		35.2859	9.12749	1.37067
183855	66.894	0.9172	0.0672		35.3292	9.13546	1.36864
184055	66.986	0.9183	0.0671		35.3778	9.14641	1.3666
184255	67.074	0.9194	0.0671		35.4243	9.15737	1.3666
184456	67.162	0.9204	0.0671		35.4708	9.16733	1.3666
184656	67.248	0.9214	0.067		35.5162	9.17729	1.36456
184857	67.332	0.9224	0.0671		35.5606	9.18725	1.3666
185057	67.416	0.9234	0.0671		35.6049	9.19721	1.3666
185257	67.508	0.9242	0.067		35.6535	9.20518	1.36456
185458	67.606	0.9255	0.067		35.7053	9.21813	1.36456
185658	67.7	0.9265	0.0674		35.7549	9.22809	1.37271
185859	67.804	0.9275	0.0674		35.8098	9.23805	1.37271
186059	67.906	0.9287	0.0674		35.8637	9.25	1.37271
186259	68	0.9295	0.0674		35.9134	9.25797	1.37271
186461	68.082	0.9307	0.0673		35.9567	9.26992	1.37067
186662	68.172	0.9316	0.0674		36.0042	9.27888	1.37271
186862	68.264	0.9327	0.0673		36.0528	9.28984	1.37067
187063	68.354	0.9337	0.0674		36.1003	9.2998	1.37271
187263	68.438	0.9346	0.0674		36.1447	9.30876	1.37271
187463	68.522	0.9356	0.0673		36.189	9.31873	1.37067
187664	68.604	0.9365	0.0674		36.2324	9.32769	1.37271
187864	68.69	0.9376	0.0674		36.2778	9.33865	1.37271
188065	68.776	0.9385	0.0674		36.3232	9.34761	1.37271
188265	68.862	0.9394	0.0674		36.3686	9.35657	1.37271
188465	68.954	0.9404	0.0674		36.4172	9.36653	1.37271
188666	69.042	0.9416	0.0673		36.4637	9.37849	1.37067
188866	69.124	0.9426	0.0674		36.507	9.38845	1.37271
189067	69.212	0.9434	0.0674		36.5535	9.39641	1.37271
189267	69.3	0.9446	0.0674		36.5999	9.40837	1.37271
189467	69.384	0.9453	0.0674		36.6443	9.41534	1.37271
189669	69.486	0.9465	0.0674		36.6982	9.42729	1.37271
189870	69.586	0.9475	0.0674		36.751	9.43725	1.37271
190070	69.678	0.9485	0.0673		36.7996	9.44721	1.37067
190271	69.766	0.9495	0.0674		36.8461	9.45717	1.37271
190471	69.85	0.9505	0.0674		36.8904	9.46713	1.37271
190671	69.936	0.9515	0.0674		36.9358	9.47709	1.37271
190872	70.02	0.9524	0.0674		36.9802	9.48606	1.37271
191072	70.106	0.9534	0.0673		37.0256	9.49602	1.37067
191273	70.194	0.9543	0.0673		37.0721	9.50498	1.37067
191473	70.28	0.9554	0.0673		37.1175	9.51594	1.37067
191673	70.364	0.9563	0.0673		37.1619	9.5249	1.37067
191874	70.456	0.9574	0.0673		37.2105	9.53586	1.37067
192074	70.548	0.9585	0.0673		37.2591	9.54681	1.37067
192275	70.636	0.9593	0.0673		37.3055	9.55478	1.37067
192475	70.734	0.9605	0.0672		37.3573	9.56673	1.36864
192675	70.822	0.9614	0.0673		37.4038	9.5757	1.37067
192877	70.912	0.9624	0.0672		37.4513	9.58566	1.36864
193078	71.004	0.9634	0.0673		37.4999	9.59562	1.37067
193278	71.092	0.9646	0.0672		37.5464	9.60757	1.36864
193479	71.174	0.9655	0.0673		37.5897	9.61653	1.37067
193679	71.264	0.9664	0.0673		37.6372	9.6255	1.37067
193879	71.346	0.9673	0.0673		37.6805	9.63446	1.37067
194080	71.436	0.9684	0.0672		37.728	9.64542	1.36864
194280	71.522	0.9693	0.0672		37.7735	9.65438	1.36864
194481	71.606	0.9704	0.0672		37.8178	9.66534	1.36864
194681	71.71	0.9715	0.0672		37.8728	9.67629	1.36864
194881	71.81	0.9725	0.0672		37.9256	9.68625	1.36864
195082	71.904	0.9736	0.0673		37.9752	9.69721	1.37067
195282	72	0.9747	0.0672		38.0259	9.70817	1.36864
195483	72.084	0.9755	0.0672		38.0703	9.71614	1.36864
195683	72.17	0.9767	0.0672		38.1157	9.72809	1.36864
195883	72.256	0.9776	0.0674		38.1611	9.73705	1.37271
196085	72.336	0.9786	0.0674		38.2034	9.74701	1.37271
196286	72.414	0.9796	0.0672		38.2446	9.75697	1.36864
196486	72.498	0.9806	0.0674		38.2889	9.76693	1.37271
196687	72.6	0.9817	0.0675		38.3428	9.77789	1.37475
196887	72.69	0.9827	0.0673		38.3903	9.78785	1.37067
197087	72.778	0.9838	0.0674		38.4368	9.7988	1.37271
197288	72.858	0.9848	0.0675		38.4791	9.80876	1.37475
197488	72.94	0.9856	0.0674		38.5224	9.81673	1.37271
197689	73.02	0.9868	0.0674		38.5646	9.82869	1.37271
197889	73.1	0.9877	0.0674		38.6069	9.83765	1.37271
198089	73.186	0.9886	0.0675		38.6523	9.84661	1.37475
198290	73.268	0.9896	0.0674		38.6956	9.85657	1.37271
198490	73.352	0.9906	0.0674		38.74	9.86653	1.37271
198691	73.43	0.9916	0.0673		38.7811	9.87649	1.37067
198891	73.512	0.9926	0.0675		38.8245	9.88645	1.37475
199091	73.596	0.9935	0.0673		38.8688	9.89542	1.37067
199293	73.676	0.9946	0.0672		38.9111	9.90637	1.36864
199494	73.754	0.9954	0.0673		38.9523	9.91434	1.37067
199694	73.848	0.9965	0.0673		39.0019	9.9253	1.37067
199895	73.928	0.9974	0.0672		39.0442	9.93426	1.36864
200095	74.014	0.9983	0.0673		39.0896	9.94323	1.37067
200295	74.1	0.9994	0.0672		39.135	9.95418	1.36864
200496	74.182	1.0004	0.0673		39.1783	9.96414	1.37067
200696	74.268	1.0014	0.0672		39.2237	9.9741	1.36864
200897	74.354	1.0026	0.0672		39.2691	9.98606	1.36864
201097	74.434	1.0035	0.0672		39.3114	9.99502	1.36864
201297	74.502	1.0045	0.0673		39.3473	10.005	1.37067
201498	74.56	1.0056	0.0672		39.3779	10.0159	1.36864
201698	74.626	1.0065	0.0672		39.4128	10.0249	1.36864
201899	74.7	1.0074	0.0672		39.4519	10.0339	1.36864
202099	74.77	1.0085	0.0672		39.4889	10.0448	1.36864
202299	74.84	1.0094	0.0672		39.5258	10.0538	1.36864
202500	74.92	1.0103	0.0672		39.5681	10.0627	1.36864
202700	75	1.0112	0.0674		39.6103	10.0717	1.37271
202901	75.1	1.0123	0.0673		39.6631	10.0827	1.37067
203101	75.184	1.0134	0.0672		39.7075	10.0936	1.36864
203301	75.27	1.0145	0.0674		39.7529	10.1046	1.37271
203503	75.35	1.0154	0.067		39.7952	10.1135	1.36456
203704	75.424	1.0165	0.0671		39.8343	10.1245	1.3666
203904	75.5	1.0175	0.067		39.8744	10.1345	1.36456
204105	75.58	1.0184	0.067		39.9166	10.1434	1.36456
204305	75.66	1.0194	0.0672		39.9589	10.1534	1.36864
204505	75.744	1.0203	0.0672		40.0033	10.1624	1.36864
204706	75.824	1.0214	0.0672		40.0455	10.1733	1.36864
204906	75.91	1.0223	0.0672		40.0909	10.1823	1.36864
205107	75.998	1.0235	0.0672		40.1374	10.1942	1.36864
205307	76.09	1.0245	0.0672		40.186	10.2042	1.36864
205507	76.18	1.0256	0.0672		40.2335	10.2151	1.36864
205708	76.262	1.0264	0.0672		40.2768	10.2231	1.36864
205908	76.35	1.0276	0.0673		40.3233	10.2351	1.37067
206109	76.43	1.0286	0.0672		40.3656	10.245	1.36864
206309	76.51	1.0296	0.0672		40.4078	10.255	1.36864
206509	76.59	1.0306	0.0672		40.4501	10.2649	1.36864
206711	76.666	1.0317	0.0672		40.4902	10.2759	1.36864
206912	76.746	1.0326	0.0672		40.5325	10.2849	1.36864
207112	76.828	1.0336	0.0673		40.5758	10.2948	1.37067
207313	76.916	1.0345	0.0672		40.6222	10.3038	1.36864
207513	77.01	1.0355	0.0672		40.6719	10.3137	1.36864
207713	77.096	1.0366	0.0672		40.7173	10.3247	1.36864
207914	77.18	1.0377	0.0672		40.7617	10.3357	1.36864
208114	77.264	1.0387	0.0672		40.806	10.3456	1.36864
208315	77.34	1.0395	0.0672		40.8462	10.3536	1.36864
208515	77.418	1.0406	0.0672		40.8874	10.3645	1.36864
208715	77.492	1.0416	0.0672		40.9264	10.3745	1.36864
208916	77.584	1.0427	0.0672		40.975	10.3855	1.36864
209116	77.664	1.0435	0.0672		41.0173	10.3934	1.36864
209317	77.744	1.0446	0.0672		41.0595	10.4044	1.36864
209517	77.822	1.0456	0.0672		41.1007	10.4143	1.36864
209717	77.9	1.0466	0.0672		41.1419	10.4243	1.36864
209919	77.972	1.0475	0.0672		41.1799	10.4333	1.36864
210120	78.048	1.0485	0.0672		41.2201	10.4432	1.36864
210320	78.132	1.0494	0.0672		41.2645	10.4522	1.36864
210521	78.216	1.0505	0.0672		41.3088	10.4631	1.36864
210721	78.294	1.0515	0.0672		41.35	10.4731	1.36864
210921	78.368	1.0525	0.0672		41.3891	10.4831	1.36864
211122	78.448	1.0535	0.0672		41.4313	10.493	1.36864
211322	78.52	1.0544	0.0672		41.4694	10.502	1.36864
211523	78.596	1.0555	0.0672		41.5095	10.5129	1.36864
211723	78.676	1.0564	0.0672		41.5518	10.5219	1.36864
211923	78.758	1.0573	0.0672		41.5951	10.5309	1.36864
212124	78.85	1.0584	0.0672		41.6437	10.5418	1.36864
212324	78.942	1.0595	0.0672		41.6922	10.5528	1.36864
212525	79.026	1.0605	0.0672		41.7366	10.5627	1.36864
212725	79.092	1.0619	0.0672		41.7715	10.5767	1.36864
212925	79.12	1.0629	0.0672		41.7863	10.5867	1.36864
213127	79.164	1.0636	0.0672		41.8095	10.5936	1.36864
213328	79.206	1.0648	0.0672		41.8317	10.6056	1.36864
213528	79.224	1.0657	0.0671		41.8412	10.6145	1.3666
213729	79.258	1.0666	0.0671		41.8591	10.6235	1.3666
213929	79.308	1.0675	0.0671		41.8855	10.6325	1.3666
214129	79.374	1.0683	0.0671		41.9204	10.6404	1.3666
214330	79.458	1.0694	0.0672		41.9648	10.6514	1.36864
214530	79.554	1.0706	0.0671		42.0155	10.6633	1.3666
214731	79.64	1.0717	0.0671		42.0609	10.6743	1.3666
214931	79.72	1.0728	0.0671		42.1031	10.6853	1.3666
215131	79.798	1.0737	0.0671		42.1443	10.6942	1.3666
215332	79.87	1.0748	0.0671		42.1824	10.7052	1.3666
215532	79.942	1.0756	0.0671		42.2204	10.7131	1.3666
215733	80.018	1.0765	0.067		42.2605	10.7221	1.36456
215933	80.098	1.0776	0.0671		42.3028	10.7331	1.3666
216133	80.178	1.0784	0.0671		42.345	10.741	1.3666
216335	80.258	1.0794	0.0671		42.3873	10.751	1.3666
216536	80.336	1.0805	0.067		42.4285	10.762	1.36456
216736	80.404	1.0816	0.067		42.4644	10.7729	1.36456
216937	80.486	1.0826	0.0671		42.5077	10.7829	1.3666
217137	80.564	1.0835	0.067		42.5489	10.7918	1.36456
217337	80.642	1.0844	0.067		42.5901	10.8008	1.36456
217538	80.726	1.0856	0.0671		42.6344	10.8127	1.3666
217738	80.82	1.0865	0.067		42.6841	10.8217	1.36456
217939	80.906	1.0876	0.067		42.7295	10.8327	1.36456
218139	80.99	1.0887	0.067		42.7739	10.8436	1.36456
218339	81.066	1.0896	0.067		42.814	10.8526	1.36456
218540	81.14	1.0907	0.067		42.8531	10.8635	1.36456
218740	81.22	1.0917	0.067		42.8953	10.8735	1.36456
218941	81.294	1.0925	0.067		42.9344	10.8815	1.36456
219141	81.368	1.0935	0.067		42.9735	10.8914	1.36456
219341	81.444	1.0945	0.067		43.0136	10.9014	1.36456
219543	81.518	1.0955	0.067		43.0527	10.9114	1.36456
219744	81.592	1.0964	0.0669		43.0918	10.9203	1.36253
219944	81.67	1.0973	0.067		43.133	10.9293	1.36456
220145	81.75	1.0985	0.0669		43.1753	10.9412	1.36253
220345	81.824	1.0994	0.0669		43.2143	10.9502	1.36253
220545	81.904	1.1002	0.067		43.2566	10.9582	1.36456
220746	82	1.1015	0.0669		43.3073	10.9711	1.36253
220946	82.09	1.1026	0.067		43.3548	10.9821	1.36456
221147	82.168	1.1036	0.0669		43.396	10.992	1.36253
221347	82.252	1.1047	0.067		43.4404	11.003	1.36456
221547	82.328	1.1056	0.067		43.4805	11.012	1.36456
221748	82.4	1.1066	0.0669		43.5185	11.0219	1.36253
221948	82.476	1.1075	0.0669		43.5587	11.0309	1.36253
222149	82.558	1.1084	0.0669		43.602	11.0398	1.36253
222349	82.638	1.1095	0.0669		43.6442	11.0508	1.36253
222549	82.718	1.1105	0.0669		43.6865	11.0608	1.36253
222750	82.8	1.1115	0.0668		43.7298	11.0707	1.36049
222950	82.878	1.1126	0.0671		43.771	11.0817	1.3666
223151	82.952	1.1134	0.0669		43.8101	11.0896	1.36253
223351	83.028	1.1144	0.067		43.8502	11.0996	1.36456
223551	83.102	1.1154	0.0671		43.8893	11.1096	1.3666
223753	83.178	1.1163	0.0669		43.9294	11.1185	1.36253
223954	83.252	1.1174	0.0669		43.9685	11.1295	1.36253
224154	83.324	1.1183	0.0668		44.0065	11.1384	1.36049
224355	83.398	1.1194	0.0668		44.0456	11.1494	1.36049
224555	83.468	1.1203	0.067		44.0826	11.1584	1.36456
224755	83.534	1.1214	0.067		44.1175	11.1693	1.36456
224956	83.61	1.1225	0.0668		44.1576	11.1803	1.36049
225156	83.68	1.1234	0.0669		44.1946	11.1892	1.36253
225357	83.764	1.1244	0.0668		44.2389	11.1992	1.36049
225557	83.858	1.1254	0.0669		44.2886	11.2092	1.36253
225757	83.944	1.1267	0.0669		44.334	11.2221	1.36253
225958	84.022	1.1277	0.0668		44.3752	11.2321	1.36049
226158	84.096	1.1286	0.0669		44.4143	11.241	1.36253
226359	84.17	1.1297	0.0668		44.4533	11.252	1.36049
226559	84.236	1.1308	0.0671		44.4882	11.2629	1.3666
226759	84.308	1.1317	0.067		44.5262	11.2719	1.36456
226961	84.376	1.1325	0.0671		44.5621	11.2799	1.3666
227162	84.45	1.1335	0.0671		44.6012	11.2898	1.3666
227362	84.522	1.1346	0.067		44.6393	11.3008	1.36456
227563	84.598	1.1356	0.0668		44.6794	11.3108	1.36049
227763	84.67	1.1366	0.0668		44.7174	11.3207	1.36049
227963	84.74	1.1375	0.0669		44.7544	11.3297	1.36253
228164	84.812	1.1385	0.0668		44.7924	11.3396	1.36049
228364	84.884	1.1395	0.0668		44.8304	11.3496	1.36049
228565	84.952	1.1404	0.0668		44.8664	11.3586	1.36049
228765	85.026	1.1414	0.067		44.9054	11.3685	1.36456
228965	85.098	1.1424	0.0668		44.9435	11.3785	1.36049
229166	85.176	1.1434	0.0668		44.9847	11.3884	1.36049
229366	85.248	1.1445	0.0668		45.0227	11.3994	1.36049
229567	85.336	1.1455	0.0668		45.0692	11.4094	1.36049
229767	85.438	1.1468	0.0668		45.123	11.4223	1.36049
229967	85.526	1.1479	0.0669		45.1695	11.4333	1.36253
230169	85.602	1.1489	0.0668		45.2096	11.4432	1.36049
230370	85.684	1.1498	0.0668		45.2529	11.4522	1.36049
230570	85.76	1.1508	0.0668		45.2931	11.4622	1.36049
230771	85.828	1.1519	0.0668		45.329	11.4731	1.36049
230971	85.902	1.153	0.0668		45.3681	11.4841	1.36049
231171	85.968	1.154	0.0667		45.4029	11.494	1.35845
231372	86.036	1.1549	0.0668		45.4389	11.503	1.36049
231572	86.102	1.1558	0.0667		45.4737	11.512	1.35845
231773	86.164	1.1569	0.0668		45.5065	11.5229	1.36049
231973	86.224	1.1579	0.0668		45.5381	11.5329	1.36049
232173	86.29	1.1587	0.0668		45.573	11.5408	1.36049
232374	86.352	1.1597	0.0668		45.6057	11.5508	1.36049
232574	86.416	1.1607	0.0668		45.6395	11.5608	1.36049
232775	86.482	1.1616	0.0668		45.6744	11.5697	1.36049
232975	86.542	1.1628	0.0668		45.7061	11.5817	1.36049
233175	86.592	1.1637	0.0668		45.7325	11.5906	1.36049
233377	86.646	1.1648	0.0668		45.761	11.6016	1.36049
233578	86.7	1.1658	0.0667		45.7895	11.6116	1.35845
233778	86.754	1.1667	0.0668		45.8181	11.6205	1.36049
233979	86.798	1.1678	0.0668		45.8413	11.6315	1.36049
234179	86.84	1.1689	0.0667		45.8635	11.6424	1.35845
234379	86.882	1.1697	0.0668		45.8857	11.6504	1.36049
234580	86.94	1.1707	0.0668		45.9163	11.6604	1.36049
234780	86.99	1.1716	0.0667		45.9427	11.6693	1.35845
234981	87.054	1.1726	0.0668		45.9765	11.6793	1.36049
235181	87.108	1.1737	0.0667		46.005	11.6902	1.35845
235381	87.17	1.1746	0.0667		46.0378	11.6992	1.35845
235582	87.234	1.1756	0.0668		46.0716	11.7092	1.36049
235782	87.298	1.1766	0.0667		46.1054	11.7191	1.35845
235983	87.362	1.1775	0.0667		46.1392	11.7281	1.35845
236183	87.426	1.1785	0.0667		46.173	11.738	1.35845
236383	87.49	1.1794	0.0668		46.2068	11.747	1.36049
236585	87.562	1.1804	0.0667		46.2448	11.757	1.35845
236786	87.628	1.1814	0.0668		46.2796	11.7669	1.36049
236986	87.702	1.1826	0.0667		46.3187	11.7789	1.35845
237187	87.77	1.1837	0.0667		46.3546	11.7898	1.35845
237387	87.838	1.1846	0.0667		46.3906	11.7988	1.35845
237587	87.896	1.1857	0.0668		46.4212	11.8098	1.36049
237788	87.956	1.1867	0.0667		46.4529	11.8197	1.35845
237988	87.972	1.1881	0.0667		46.4613	11.8337	1.35845
238189	87.98	1.1889	0.0667		46.4656	11.8416	1.35845
238389	88.002	1.1897	0.0667		46.4772	11.8496	1.35845
238589	88.04	1.1907	0.0667		46.4972	11.8596	1.35845
238790	88.088	1.1916	0.0667		46.5226	11.8685	1.35845
238990	88.136	1.1925	0.0667		46.5479	11.8775	1.35845
239191	88.192	1.1935	0.0667		46.5775	11.8875	1.35845
239391	88.232	1.1948	0.0667		46.5986	11.9004	1.35845
239591	88.266	1.1958	0.0667		46.6166	11.9104	1.35845
239793	88.304	1.1968	0.0667		46.6367	11.9203	1.35845
239994	88.342	1.1976	0.0667		46.6567	11.9283	1.35845
240194	88.384	1.1985	0.0667		46.6789	11.9373	1.35845
240395	88.43	1.1995	0.0667		46.7032	11.9472	1.35845
240595	88.49	1.2005	0.0667		46.7349	11.9572	1.35845
240795	88.552	1.2015	0.0667		46.7676	11.9671	1.35845
240996	88.616	1.2026	0.0667		46.8014	11.9781	1.35845
241196	88.674	1.2036	0.0667		46.8321	11.988	1.35845
241397	88.74	1.2044	0.0666		46.8669	11.996	1.35642
241597	88.808	1.2054	0.0667		46.9028	12.006	1.35845
241797	88.878	1.2064	0.0666		46.9398	12.0159	1.35642
241998	88.96	1.2075	0.0667		46.9831	12.0269	1.35845
242198	89.028	1.2085	0.0667		47.019	12.0369	1.35845
242399	89.092	1.2096	0.0666		47.0528	12.0478	1.35642
242599	89.156	1.2106	0.0667		47.0866	12.0578	1.35845
242799	89.192	1.212	0.0667		47.1057	12.0717	1.35845
243000	89.236	1.2128	0.0666		47.1289	12.0797	1.35642
243200	89.278	1.2138	0.0666		47.1511	12.0896	1.35642
243401	89.326	1.2147	0.0666		47.1764	12.0986	1.35642
243601	89.374	1.2157	0.0666		47.2018	12.1086	1.35642
243801	89.434	1.2166	0.0666		47.2335	12.1175	1.35642
244003	89.502	1.2177	0.0666		47.2694	12.1285	1.35642
244204	89.56	1.2187	0.0666		47.3	12.1384	1.35642
244404	89.614	1.2196	0.0666		47.3285	12.1474	1.35642
244605	89.67	1.2207	0.0666		47.3581	12.1584	1.35642
244805	89.728	1.2216	0.0666		47.3887	12.1673	1.35642
245005	89.778	1.2226	0.0666		47.4151	12.1773	1.35642
245206	89.238	1.2264	0.0665		47.1299	12.2151	1.35438
245217	88.152	1.2309	0.0664		46.5564	12.26	1.35234
245221	86.81	1.2343	0.0664		45.8476	12.2938	1.35234
245225	84.334	1.2384	0.0667		44.54	12.3347	1.35845
245227	81.542	1.243	0.0671		43.0654	12.3805	1.3666
245229	77.416	1.2502	0.068		40.8863	12.4522	1.38493
245231	73.422	1.2502	0.068		38.7769	12.4522	1.38493
245233	69.188	1.2502	0.068		36.5408	12.4522	1.38493
245235	64.358	1.2502	0.068		33.9899	12.4522	1.38493
245236	58.96	1.2502	0.068		31.139	12.4522	1.38493
245238	41.98	1.2502	0.068		22.1712	12.4522	1.38493
245240	17.188	1.2502	0.068		9.07763	12.4522	1.38493
245242	4.276	1.2502	0.068		2.25832	12.4522	1.38493
245244	3.032	1.2502	0.068		1.60131	12.4522	1.38493

## Sheet: A-2
Force (small)	--	journey	) Results Report
17:21:53,06/23/2019
Diameter: 49.1	mm	Height: 100.4	mm
Vertical force transducer (Test piece vertical force)
Control mode: displacement	Waveform: Slope
mm/s	Force the finish:1.2502	mm
Time (ms)	Vertical force (KN)	Vertical deformation (mm)	Transverse deformation (mm)
0	0	0	0		stress	Axial strain	lateral deformation
200	0.014	0.0001	-0.0001		0.00733406	0.001002	-0.0020284
400	0.06	0.0017	-0.0002		0.0314317	0.0170341	-0.0040568
601	0.046	0.0028	-0.0002		0.0240976	0.0280561	-0.0040568
801	0.078	0.0037	-0.0003		0.0408612	0.0370741	-0.00608519
1003	0.084	0.0051	-0.0002		0.0440043	0.0511022	-0.0040568
1204	0.09	0.0059	-0.0003		0.0471475	0.0591182	-0.00608519
1404	0.098	0.0067	-0.0007		0.0513384	0.0671343	-0.0141988
1604	0.102	0.0075	-0.0005		0.0534338	0.0751503	-0.010142
1805	0.11	0.0084	-0.0005		0.0576247	0.0841683	-0.010142
2005	0.118	0.0094	-0.0004		0.0618156	0.0941884	-0.00811359
2206	0.122	0.0106	-0.0005		0.0639111	0.106212	-0.010142
2406	0.13	0.0116	-0.0005		0.068102	0.116232	-0.010142
2606	0.138	0.0126	-0.0012		0.0722929	0.126253	-0.0243408
2807	0.146	0.0137	-0.0017		0.0764837	0.137275	-0.0344828
3007	0.15	0.0148	-0.0021		0.0785792	0.148297	-0.0425963
3208	0.162	0.0157	-0.0021		0.0848655	0.157315	-0.0425963
3408	0.166	0.0168	-0.0022		0.086961	0.168337	-0.0446247
3608	0.174	0.0178	-0.0022		0.0911519	0.178357	-0.0446247
3809	0.182	0.0188	-0.0022		0.0953427	0.188377	-0.0446247
4009	0.188	0.0197	-0.0021		0.0984859	0.197395	-0.0425963
4211	0.196	0.0207	-0.0019		0.102677	0.207415	-0.0385396
4412	0.202	0.0217	-0.0018		0.10582	0.217435	-0.0365112
4612	0.212	0.0226	-0.0012		0.111059	0.226453	-0.0243408
4813	0.218	0.0235	-0.0013		0.114202	0.235471	-0.0263692
5013	0.226	0.0244	-0.0016		0.118393	0.244489	-0.0324544
5213	0.232	0.0253	-0.0019		0.121536	0.253507	-0.0385396
5414	0.244	0.0263	-0.0021		0.127822	0.263527	-0.0425963
5614	0.254	0.0273	-0.0021		0.133061	0.273547	-0.0425963
5814	0.266	0.0283	-0.002		0.139347	0.283567	-0.040568
6015	0.274	0.0294	-0.002		0.143538	0.294589	-0.040568
6215	0.282	0.0303	-0.002		0.147729	0.303607	-0.040568
6416	0.294	0.0314	-0.002		0.154015	0.314629	-0.040568
6616	0.306	0.0322	-0.002		0.160302	0.322645	-0.040568
6816	0.316	0.033	-0.002		0.16554	0.330661	-0.040568
7017	0.332	0.0343	-0.002		0.173922	0.343687	-0.040568
7217	0.35	0.0354	-0.002		0.183351	0.354709	-0.040568
7419	0.37	0.0367	-0.002		0.193829	0.367735	-0.040568
7620	0.386	0.0381	-0.0019		0.20221	0.381764	-0.0385396
7820	0.398	0.0391	-0.0018		0.208497	0.391784	-0.0365112
8021	0.412	0.0401	-0.0019		0.215831	0.401804	-0.0385396
8221	0.424	0.0413	-0.0019		0.222117	0.413828	-0.0385396
8421	0.438	0.0423	-0.0017		0.229451	0.423848	-0.0344828
8622	0.45	0.0433	-0.0018		0.235738	0.433868	-0.0365112
8822	0.466	0.0444	-0.002		0.244119	0.44489	-0.040568
9022	0.476	0.0453	-0.0019		0.249358	0.453908	-0.0385396
9223	0.484	0.0462	-0.0019		0.253549	0.462926	-0.0385396
9423	0.498	0.0471	-0.0019		0.260883	0.471944	-0.0385396
9624	0.51	0.0483	-0.0019		0.267169	0.483968	-0.0385396
9824	0.52	0.0491	-0.0018		0.272408	0.491984	-0.0365112
10024	0.532	0.0501	-0.0018		0.278694	0.502004	-0.0365112
10225	0.546	0.0512	-0.0018		0.286028	0.513026	-0.0365112
10425	0.558	0.0523	-0.0018		0.292315	0.524048	-0.0365112
10627	0.572	0.0533	-0.0019		0.299649	0.534068	-0.0385396
10828	0.584	0.0543	-0.0019		0.305935	0.544088	-0.0385396
11028	0.598	0.0555	-0.002		0.313269	0.556112	-0.040568
11229	0.61	0.0565	-0.0019		0.319555	0.566132	-0.0385396
11429	0.624	0.0573	-0.0019		0.326889	0.574148	-0.0385396
11629	0.632	0.0582	-0.0019		0.33108	0.583166	-0.0385396
11830	0.646	0.0591	-0.0019		0.338414	0.592184	-0.0385396
12030	0.658	0.0598	-0.002		0.344701	0.599198	-0.040568
12230	0.672	0.061	-0.0019		0.352035	0.611222	-0.0385396
12431	0.684	0.0619	-0.002		0.358321	0.62024	-0.040568
12631	0.7	0.0628	-0.0019		0.366703	0.629259	-0.0385396
12832	0.714	0.0638	-0.0019		0.374037	0.639279	-0.0385396
13032	0.73	0.0648	-0.002		0.382419	0.649299	-0.040568
13232	0.746	0.0659	-0.0021		0.3908	0.660321	-0.0425963
13433	0.76	0.0669	-0.0021		0.398135	0.670341	-0.0425963
13633	0.772	0.0679	-0.0021		0.404421	0.680361	-0.0425963
13835	0.788	0.069	-0.0021		0.412803	0.691383	-0.0425963
14036	0.802	0.0699	-0.002		0.420137	0.700401	-0.040568
14236	0.818	0.071	-0.0022		0.428519	0.711423	-0.0446247
14437	0.832	0.072	-0.0021		0.435853	0.721443	-0.0425963
14637	0.85	0.073	-0.002		0.445282	0.731463	-0.040568
14837	0.868	0.074	-0.0019		0.454712	0.741483	-0.0385396
15038	0.88	0.0751	-0.002		0.460998	0.752505	-0.040568
15238	0.898	0.0761	-0.002		0.470427	0.762525	-0.040568
15438	0.914	0.0771	-0.0019		0.478809	0.772545	-0.0385396
15639	0.93	0.0781	-0.0019		0.487191	0.782565	-0.0385396
15839	0.944	0.0791	-0.0018		0.494525	0.792585	-0.0365112
16040	0.966	0.08	-0.0018		0.50605	0.801603	-0.0365112
16240	0.982	0.0811	-0.0018		0.514432	0.812625	-0.0365112
16440	1	0.0819	-0.0017		0.523861	0.820641	-0.0344828
16641	1.02	0.0831	-0.0017		0.534338	0.832665	-0.0344828
16841	1.036	0.0841	-0.0015		0.54272	0.842685	-0.030426
17043	1.052	0.085	-0.0015		0.551102	0.851703	-0.030426
17244	1.072	0.0859	-0.0014		0.561579	0.860721	-0.0283976
17444	1.092	0.087	-0.0016		0.572056	0.871743	-0.0324544
17645	1.112	0.088	-0.0015		0.582534	0.881764	-0.030426
17845	1.13	0.089	-0.0015		0.591963	0.891784	-0.030426
18045	1.15	0.0899	-0.0015		0.60244	0.900802	-0.030426
18246	1.17	0.0909	-0.0015		0.612918	0.910822	-0.030426
18446	1.192	0.0919	-0.0014		0.624443	0.920842	-0.0283976
18646	1.214	0.093	-0.0014		0.635968	0.931864	-0.0283976
18847	1.232	0.094	-0.0013		0.645397	0.941884	-0.0263692
19047	1.258	0.0948	-0.0014		0.659017	0.9499	-0.0283976
19248	1.278	0.0959	-0.0013		0.669495	0.960922	-0.0263692
19448	1.3	0.097	-0.0013		0.68102	0.971944	-0.0263692
19648	1.32	0.098	-0.0013		0.691497	0.981964	-0.0263692
19849	1.344	0.099	-0.0013		0.70407	0.991984	-0.0263692
20049	1.368	0.1	-0.0013		0.716642	1.002	-0.0263692
20250	1.388	0.101	-0.0013		0.727119	1.01202	-0.0263692
20450	1.41	0.102	-0.0011		0.738644	1.02204	-0.0223124
20650	1.428	0.103	-0.001		0.748074	1.03206	-0.020284
20851	1.452	0.1042	-0.001		0.760647	1.04409	-0.020284
21051	1.474	0.1051	-0.001		0.772171	1.05311	-0.020284
21253	1.498	0.1061	-0.0012		0.784744	1.06313	-0.0243408
21454	1.52	0.1071	-0.0011		0.796269	1.07315	-0.0223124
21654	1.542	0.108	-0.0011		0.807794	1.08216	-0.0223124
21854	1.564	0.1092	-0.001		0.819319	1.09419	-0.020284
22055	1.59	0.11	-0.001		0.832939	1.1022	-0.020284
22255	1.612	0.1111	-0.0012		0.844464	1.11323	-0.0243408
22456	1.634	0.1122	-0.0011		0.855989	1.12425	-0.0223124
22656	1.658	0.113	-0.0011		0.868562	1.13226	-0.0223124
22856	1.68	0.114	-0.0012		0.880087	1.14228	-0.0243408
23057	1.706	0.1151	-0.0012		0.893707	1.15331	-0.0243408
23257	1.728	0.116	-0.0012		0.905232	1.16232	-0.0243408
23458	1.754	0.1171	-0.0011		0.918853	1.17335	-0.0223124
23658	1.778	0.1178	-0.0011		0.931425	1.18036	-0.0223124
23858	1.804	0.119	-0.0013		0.945046	1.19238	-0.0263692
24059	1.826	0.1201	-0.0012		0.956571	1.20341	-0.0243408
24259	1.852	0.121	-0.0012		0.970191	1.21242	-0.0243408
24461	1.876	0.1219	-0.0012		0.982764	1.22144	-0.0243408
24662	1.902	0.123	-0.0012		0.996384	1.23246	-0.0243408
24862	1.926	0.124	-0.0012		1.00896	1.24248	-0.0243408
25063	1.952	0.125	-0.0012		1.02258	1.25251	-0.0243408
25263	1.98	0.126	-0.0011		1.03725	1.26253	-0.0223124
25463	2.004	0.127	-0.0012		1.04982	1.27255	-0.0243408
25664	2.03	0.128	-0.0013		1.06344	1.28257	-0.0263692
25864	2.056	0.1289	-0.0013		1.07706	1.29158	-0.0263692
26064	2.08	0.1299	-0.0013		1.08963	1.3016	-0.0263692
26265	2.106	0.1309	-0.0012		1.10325	1.31162	-0.0243408
26465	2.134	0.1319	-0.0012		1.11792	1.32164	-0.0243408
26666	2.16	0.133	-0.0013		1.13154	1.33267	-0.0263692
26866	2.182	0.134	-0.0013		1.14307	1.34269	-0.0263692
27066	2.21	0.1349	-0.0013		1.15773	1.3517	-0.0263692
27267	2.238	0.136	-0.0014		1.1724	1.36273	-0.0283976
27467	2.264	0.137	-0.0014		1.18602	1.37275	-0.0283976
27669	2.292	0.1379	-0.0014		1.20069	1.38176	-0.0283976
27870	2.32	0.1389	-0.0015		1.21536	1.39178	-0.030426
28070	2.348	0.1398	-0.0015		1.23003	1.4008	-0.030426
28271	2.374	0.1409	-0.0015		1.24365	1.41182	-0.030426
28471	2.402	0.1418	-0.0015		1.25831	1.42084	-0.030426
28671	2.432	0.143	-0.0015		1.27403	1.43287	-0.030426
28872	2.46	0.1439	-0.0015		1.2887	1.44188	-0.030426
29072	2.488	0.1449	-0.0014		1.30337	1.4519	-0.0283976
29272	2.518	0.1459	-0.0016		1.31908	1.46192	-0.0324544
29473	2.544	0.1468	-0.0017		1.3327	1.47094	-0.0344828
29673	2.576	0.1477	-0.0016		1.34947	1.47996	-0.0324544
29874	2.606	0.1487	-0.0016		1.36518	1.48998	-0.0324544
30074	2.632	0.1498	-0.0016		1.3788	1.501	-0.0324544
30274	2.666	0.1509	-0.0017		1.39661	1.51202	-0.0344828
30475	2.698	0.1517	-0.0017		1.41338	1.52004	-0.0344828
30675	2.728	0.1528	-0.0017		1.42909	1.53106	-0.0344828
30877	2.76	0.1538	-0.0018		1.44586	1.54108	-0.0365112
31078	2.79	0.1548	-0.0018		1.46157	1.5511	-0.0365112
31278	2.82	0.1559	-0.0018		1.47729	1.56212	-0.0365112
31479	2.856	0.157	-0.0019		1.49615	1.57315	-0.0385396
31679	2.886	0.1579	-0.0019		1.51186	1.58216	-0.0385396
31879	2.918	0.1589	-0.0019		1.52863	1.59218	-0.0385396
32080	2.948	0.1599	-0.0019		1.54434	1.6022	-0.0385396
32280	2.982	0.1609	-0.0019		1.56215	1.61222	-0.0385396
32480	3.016	0.1618	-0.002		1.57997	1.62124	-0.040568
32681	3.046	0.1628	-0.002		1.59568	1.63126	-0.040568
32881	3.08	0.1639	-0.002		1.61349	1.64228	-0.040568
33082	3.112	0.1649	-0.0022		1.63026	1.6523	-0.0446247
33282	3.146	0.1657	-0.0022		1.64807	1.66032	-0.0446247
33482	3.182	0.1668	-0.0023		1.66693	1.67134	-0.0466531
33683	3.22	0.1678	-0.0023		1.68683	1.68136	-0.0466531
33883	3.256	0.1688	-0.0023		1.70569	1.69138	-0.0466531
34085	3.29	0.1698	-0.0024		1.7235	1.7014	-0.0486815
34286	3.324	0.1709	-0.0025		1.74131	1.71242	-0.0507099
34486	3.358	0.1719	-0.0024		1.75913	1.72244	-0.0486815
34687	3.394	0.1729	-0.0025		1.77799	1.73246	-0.0507099
34887	3.43	0.1739	-0.0025		1.79684	1.74248	-0.0507099
35087	3.464	0.1749	-0.0026		1.81466	1.75251	-0.0527383
35288	3.5	0.1758	-0.0027		1.83351	1.76152	-0.0547667
35488	3.536	0.1769	-0.0027		1.85237	1.77255	-0.0547667
35688	3.57	0.178	-0.0028		1.87018	1.78357	-0.0567951
35889	3.608	0.1788	-0.0028		1.89009	1.79158	-0.0567951
36089	3.646	0.1798	-0.0029		1.91	1.8016	-0.0588235
36290	3.684	0.1809	-0.0028		1.9299	1.81263	-0.0567951
36490	3.722	0.1819	-0.003		1.94981	1.82265	-0.0608519
36690	3.76	0.1829	-0.0031		1.96972	1.83267	-0.0628803
36891	3.794	0.1838	-0.003		1.98753	1.84168	-0.0608519
37091	3.83	0.1848	-0.0031		2.00639	1.8517	-0.0628803
37293	3.868	0.1859	-0.0033		2.0263	1.86273	-0.0669371
37494	3.904	0.1869	-0.0032		2.04515	1.87275	-0.0649087
37694	3.942	0.1879	-0.0032		2.06506	1.88277	-0.0649087
37895	3.982	0.189	-0.0033		2.08602	1.89379	-0.0669371
38095	4.016	0.1899	-0.0035		2.10383	1.90281	-0.0709939
38295	4.056	0.1909	-0.0034		2.12478	1.91283	-0.0689655
38496	4.094	0.1919	-0.0035		2.14469	1.92285	-0.0709939
38696	4.132	0.1927	-0.0035		2.16459	1.93086	-0.0709939
38896	4.172	0.1939	-0.0036		2.18555	1.94289	-0.0730223
39097	4.216	0.1948	-0.0036		2.2086	1.9519	-0.0730223
39297	4.254	0.1959	-0.0036		2.22851	1.96293	-0.0730223
39498	4.292	0.197	-0.0037		2.24841	1.97395	-0.0750507
39698	4.334	0.1979	-0.0038		2.27041	1.98297	-0.0770791
39898	4.372	0.1989	-0.0037		2.29032	1.99299	-0.0750507
40099	4.414	0.1998	-0.0039		2.31232	2.002	-0.0791075
40299	4.454	0.201	-0.0038		2.33328	2.01403	-0.0770791
40500	4.496	0.2019	-0.0039		2.35528	2.02305	-0.0791075
40700	4.532	0.2029	-0.004		2.37414	2.03307	-0.0811359
40900	4.576	0.2039	-0.004		2.39719	2.04309	-0.0811359
41101	4.616	0.2049	-0.0039		2.41814	2.05311	-0.0791075
41301	4.658	0.206	-0.0039		2.44015	2.06413	-0.0791075
41503	4.702	0.207	-0.0039		2.4632	2.07415	-0.0791075
41704	4.744	0.2079	-0.004		2.4852	2.08317	-0.0811359
41904	4.782	0.2089	-0.0042		2.5051	2.09319	-0.0851927
42104	4.828	0.2099	-0.0043		2.5292	2.10321	-0.0872211
42305	4.87	0.2109	-0.0042		2.5512	2.11323	-0.0851927
42505	4.91	0.212	-0.0043		2.57216	2.12425	-0.0872211
42706	4.954	0.2129	-0.0043		2.59521	2.13327	-0.0872211
42906	4.996	0.214	-0.0044		2.61721	2.14429	-0.0892495
43106	5.036	0.2148	-0.0044		2.63817	2.1523	-0.0892495
43307	5.078	0.2158	-0.0044		2.66017	2.16232	-0.0892495
43507	5.124	0.2169	-0.0044		2.68427	2.17335	-0.0892495
43708	5.166	0.2179	-0.0045		2.70627	2.18337	-0.0912779
43908	5.214	0.219	-0.0045		2.73141	2.19439	-0.0912779
44108	5.256	0.2199	-0.0046		2.75341	2.20341	-0.0933063
44309	5.3	0.221	-0.0046		2.77646	2.21443	-0.0933063
44509	5.346	0.2219	-0.0046		2.80056	2.22345	-0.0933063
44711	5.388	0.2229	-0.0047		2.82256	2.23347	-0.0953347
44912	5.434	0.224	-0.0047		2.84666	2.24449	-0.0953347
45112	5.474	0.225	-0.0047		2.86762	2.25451	-0.0953347
45313	5.518	0.2258	-0.0046		2.89067	2.26253	-0.0933063
45513	5.56	0.227	-0.0046		2.91267	2.27455	-0.0933063
45713	5.604	0.2279	-0.0048		2.93572	2.28357	-0.0973631
45914	5.648	0.2288	-0.0046		2.95877	2.29259	-0.0933063
46114	5.692	0.2297	-0.0048		2.98182	2.3016	-0.0973631
46314	5.738	0.2307	-0.0049		3.00592	2.31162	-0.0993915
46515	5.786	0.2317	-0.0049		3.03106	2.32164	-0.0993915
46715	5.828	0.2327	-0.0048		3.05306	2.33166	-0.0973631
46916	5.876	0.2337	-0.0049		3.07821	2.34168	-0.0993915
47116	5.922	0.2348	-0.0049		3.10231	2.35271	-0.0993915
47316	5.966	0.2357	-0.0049		3.12536	2.36172	-0.0993915
47517	6.014	0.2367	-0.0048		3.1505	2.37174	-0.0973631
47717	6.06	0.2377	-0.0049		3.1746	2.38176	-0.0993915
47919	6.104	0.2388	-0.0049		3.19765	2.39279	-0.0993915
48120	6.152	0.2396	-0.0049		3.22279	2.4008	-0.0993915
48320	6.202	0.2408	-0.005		3.24899	2.41283	-0.10142
48521	6.252	0.2417	-0.0051		3.27518	2.42184	-0.103448
48721	6.304	0.2428	-0.0051		3.30242	2.43287	-0.103448
48921	6.348	0.2438	-0.0052		3.32547	2.44289	-0.105477
49122	6.398	0.2448	-0.0052		3.35166	2.45291	-0.105477
49322	6.446	0.2457	-0.0052		3.37681	2.46192	-0.105477
49522	6.496	0.2467	-0.0052		3.403	2.47194	-0.105477
49723	6.544	0.2478	-0.005		3.42815	2.48297	-0.10142
49923	6.594	0.2488	-0.0051		3.45434	2.49299	-0.103448
50124	6.642	0.2499	-0.0053		3.47949	2.50401	-0.107505
50324	6.69	0.2508	-0.0053		3.50463	2.51303	-0.107505
50524	6.742	0.2518	-0.0052		3.53187	2.52305	-0.105477
50725	6.79	0.2528	-0.0053		3.55702	2.53307	-0.107505
50925	6.836	0.2538	-0.0053		3.58112	2.54309	-0.107505
51127	6.884	0.2547	-0.0053		3.60626	2.5521	-0.107505
51328	6.938	0.2557	-0.0053		3.63455	2.56212	-0.107505
51528	6.986	0.2567	-0.0054		3.65969	2.57214	-0.109533
51729	7.04	0.2577	-0.0053		3.68798	2.58216	-0.107505
51929	7.088	0.2587	-0.0054		3.71313	2.59218	-0.109533
52129	7.138	0.2598	-0.0054		3.73932	2.60321	-0.109533
52330	7.186	0.2607	-0.0055		3.76447	2.61222	-0.111562
52530	7.238	0.2617	-0.0055		3.79171	2.62224	-0.111562
52730	7.29	0.2627	-0.0054		3.81895	2.63226	-0.109533
52931	7.338	0.2638	-0.0054		3.84409	2.64329	-0.109533
53131	7.388	0.2648	-0.0054		3.87029	2.65331	-0.109533
53332	7.438	0.2658	-0.0054		3.89648	2.66333	-0.109533
53532	7.49	0.2667	-0.0054		3.92372	2.67234	-0.109533
53732	7.538	0.2677	-0.0055		3.94887	2.68236	-0.111562
53933	7.59	0.2687	-0.0053		3.97611	2.69238	-0.107505
54133	7.642	0.2696	-0.0052		4.00335	2.7014	-0.105477
54335	7.692	0.2707	-0.0053		4.02954	2.71242	-0.107505
54536	7.746	0.2717	-0.0053		4.05783	2.72244	-0.107505
54736	7.796	0.2727	-0.0055		4.08402	2.73246	-0.111562
54937	7.85	0.2737	-0.0055		4.11231	2.74248	-0.111562
55137	7.9	0.2747	-0.0055		4.1385	2.75251	-0.111562
55337	7.954	0.2757	-0.0055		4.16679	2.76253	-0.111562
55538	8.008	0.2767	-0.0055		4.19508	2.77255	-0.111562
55738	8.064	0.2777	-0.0054		4.22442	2.78257	-0.109533
55938	8.116	0.2787	-0.0055		4.25166	2.79259	-0.111562
56139	8.172	0.2797	-0.0055		4.28099	2.80261	-0.111562
56339	8.226	0.2805	-0.0056		4.30928	2.81062	-0.11359
56540	8.286	0.2815	-0.0057		4.34071	2.82064	-0.115619
56740	8.342	0.2826	-0.0056		4.37005	2.83166	-0.11359
56940	8.398	0.2836	-0.0056		4.39939	2.84168	-0.11359
57141	8.452	0.2846	-0.0056		4.42768	2.8517	-0.11359
57341	8.51	0.2856	-0.0056		4.45806	2.86172	-0.11359
57543	8.57	0.2867	-0.0056		4.48949	2.87275	-0.11359
57744	8.626	0.2876	-0.0055		4.51883	2.88176	-0.111562
57944	8.686	0.2886	-0.0056		4.55026	2.89178	-0.11359
58145	8.744	0.2895	-0.0056		4.58064	2.9008	-0.11359
58345	8.8	0.2906	-0.0057		4.60998	2.91182	-0.115619
58545	8.858	0.2915	-0.0057		4.64036	2.92084	-0.115619
58746	8.916	0.2925	-0.0057		4.67075	2.93086	-0.115619
58946	8.976	0.2936	-0.0058		4.70218	2.94188	-0.117647
59146	9.036	0.2946	-0.0057		4.73361	2.9519	-0.115619
59347	9.098	0.2957	-0.0057		4.76609	2.96293	-0.115619
59547	9.154	0.2966	-0.0057		4.79543	2.97194	-0.115619
59748	9.216	0.2976	-0.0057		4.82791	2.98196	-0.115619
59948	9.278	0.2986	-0.0058		4.86038	2.99198	-0.117647
60148	9.336	0.2997	-0.0057		4.89077	3.00301	-0.115619
60349	9.396	0.3005	-0.0057		4.9222	3.01102	-0.115619
60549	9.456	0.3015	-0.0058		4.95363	3.02104	-0.117647
60750	9.516	0.3025	-0.0057		4.98506	3.03106	-0.115619
60950	9.578	0.3035	-0.0057		5.01754	3.04108	-0.115619
61150	9.638	0.3045	-0.0057		5.04897	3.0511	-0.115619
61351	9.702	0.3055	-0.0057		5.0825	3.06112	-0.115619
61551	9.764	0.3063	-0.0058		5.11498	3.06914	-0.117647
61753	9.828	0.3075	-0.0058		5.14851	3.08116	-0.117647
61954	9.894	0.3085	-0.0058		5.18308	3.09118	-0.117647
62154	9.96	0.3097	-0.0058		5.21766	3.10321	-0.117647
62354	10.024	0.3105	-0.0058		5.25119	3.11122	-0.117647
62555	10.088	0.3116	-0.0059		5.28471	3.12224	-0.119675
62755	10.152	0.3126	-0.0058		5.31824	3.13226	-0.117647
62956	10.218	0.3136	-0.0057		5.35281	3.14228	-0.115619
63156	10.282	0.3147	-0.0056		5.38634	3.15331	-0.11359
63356	10.348	0.3158	-0.0058		5.42092	3.16433	-0.117647
63557	10.412	0.3168	-0.0057		5.45444	3.17435	-0.115619
63757	10.474	0.3177	-0.0057		5.48692	3.18337	-0.115619
63958	10.54	0.3187	-0.0056		5.5215	3.19339	-0.11359
64158	10.6	0.3197	-0.0056		5.55293	3.20341	-0.11359
64358	10.666	0.3207	-0.0057		5.5875	3.21343	-0.115619
64559	10.73	0.3217	-0.0058		5.62103	3.22345	-0.117647
64759	10.794	0.3226	-0.0059		5.65456	3.23246	-0.119675
64961	10.86	0.3237	-0.0059		5.68913	3.24349	-0.119675
65162	10.922	0.3247	-0.0058		5.72161	3.25351	-0.117647
65362	10.984	0.3256	-0.0058		5.75409	3.26253	-0.117647
65563	11.05	0.3266	-0.0059		5.78867	3.27255	-0.119675
65763	11.114	0.3278	-0.0058		5.82219	3.28457	-0.117647
65963	11.18	0.3286	-0.0058		5.85677	3.29259	-0.117647
66164	11.246	0.3296	-0.0057		5.89134	3.30261	-0.115619
66364	11.312	0.3305	-0.0058		5.92592	3.31162	-0.117647
66564	11.38	0.3317	-0.0056		5.96154	3.32365	-0.11359
66765	11.442	0.3327	-0.0057		5.99402	3.33367	-0.115619
66965	11.508	0.3336	-0.0058		6.0286	3.34269	-0.117647
67166	11.576	0.3347	-0.0058		6.06422	3.35371	-0.117647
67366	11.638	0.3357	-0.0059		6.0967	3.36373	-0.119675
67566	11.704	0.3367	-0.0058		6.13127	3.37375	-0.117647
67767	11.768	0.3376	-0.0057		6.1648	3.38277	-0.115619
67967	11.834	0.3386	-0.0056		6.19937	3.39279	-0.11359
68169	11.9	0.3394	-0.0057		6.23395	3.4008	-0.115619
68370	11.968	0.3405	-0.0056		6.26957	3.41182	-0.11359
68570	12.036	0.3415	-0.0057		6.30519	3.42184	-0.115619
68771	12.104	0.3425	-0.0057		6.34082	3.43186	-0.115619
68971	12.172	0.3434	-0.0058		6.37644	3.44088	-0.117647
69171	12.24	0.3444	-0.0058		6.41206	3.4509	-0.117647
69372	12.312	0.3455	-0.0057		6.44978	3.46192	-0.115619
69572	12.382	0.3465	-0.0057		6.48645	3.47194	-0.115619
69772	12.452	0.3475	-0.0057		6.52312	3.48196	-0.115619
69973	12.522	0.3483	-0.0057		6.55979	3.48998	-0.115619
70173	12.596	0.3495	-0.0056		6.59856	3.502	-0.11359
70374	12.666	0.3505	-0.0057		6.63523	3.51202	-0.115619
70574	12.74	0.3515	-0.0056		6.67399	3.52204	-0.11359
70774	12.812	0.3525	-0.0057		6.71171	3.53206	-0.115619
70975	12.884	0.3537	-0.0057		6.74943	3.54409	-0.115619
71175	12.956	0.3546	-0.0056		6.78715	3.55311	-0.11359
71377	13.026	0.3556	-0.0055		6.82382	3.56313	-0.111562
71578	13.098	0.3566	-0.0055		6.86153	3.57315	-0.111562
71778	13.168	0.3576	-0.0054		6.89821	3.58317	-0.109533
71979	13.238	0.3585	-0.0054		6.93488	3.59218	-0.109533
72179	13.314	0.3595	-0.0055		6.97469	3.6022	-0.111562
72379	13.39	0.3607	-0.0054		7.0145	3.61423	-0.109533
72580	13.46	0.3617	-0.0055		7.05117	3.62425	-0.111562
72780	13.534	0.3627	-0.0054		7.08994	3.63427	-0.109533
72980	13.606	0.3636	-0.0053		7.12766	3.64329	-0.107505
73181	13.68	0.3646	-0.0054		7.16642	3.65331	-0.109533
73381	13.75	0.3656	-0.0053		7.20309	3.66333	-0.107505
73582	13.82	0.3666	-0.0054		7.23976	3.67335	-0.109533
73782	13.892	0.3676	-0.0052		7.27748	3.68337	-0.105477
73982	13.964	0.3685	-0.0053		7.3152	3.69238	-0.107505
74183	14.036	0.3696	-0.0052		7.35292	3.70341	-0.105477
74383	14.106	0.3705	-0.0051		7.38959	3.71242	-0.103448
74585	14.178	0.3715	-0.0052		7.4273	3.72244	-0.105477
74786	14.25	0.3725	-0.0051		7.46502	3.73246	-0.103448
74986	14.322	0.3735	-0.0051		7.50274	3.74248	-0.103448
75187	14.394	0.3743	-0.0051		7.54046	3.7505	-0.103448
75387	14.476	0.3754	-0.0051		7.58342	3.76152	-0.103448
75587	14.558	0.3765	-0.0049		7.62637	3.77255	-0.0993915
75788	14.642	0.3777	-0.005		7.67038	3.78457	-0.10142
75988	14.728	0.3788	-0.005		7.71543	3.79559	-0.10142
76188	14.808	0.3797	-0.0048		7.75734	3.80461	-0.0973631
76389	14.888	0.3808	-0.0048		7.79925	3.81563	-0.0973631
76589	14.964	0.3818	-0.0048		7.83906	3.82565	-0.0973631
76790	15.04	0.3828	-0.0049		7.87887	3.83567	-0.0993915
76990	15.118	0.3837	-0.0048		7.91973	3.84469	-0.0973631
77190	15.196	0.3847	-0.0049		7.9606	3.85471	-0.0993915
77391	15.274	0.3857	-0.0048		8.00146	3.86473	-0.0973631
77591	15.344	0.3867	-0.0047		8.03813	3.87475	-0.0953347
77793	15.418	0.3877	-0.0047		8.07689	3.88477	-0.0953347
77994	15.494	0.3888	-0.0047		8.11671	3.89579	-0.0953347
78194	15.566	0.3897	-0.0046		8.15442	3.90481	-0.0933063
78395	15.638	0.3907	-0.0046		8.19214	3.91483	-0.0933063
78595	15.716	0.3916	-0.0046		8.233	3.92385	-0.0933063
78795	15.788	0.3926	-0.0045		8.27072	3.93387	-0.0912779
78996	15.866	0.3936	-0.0044		8.31158	3.94389	-0.0892495
79196	15.94	0.3946	-0.0044		8.35035	3.95391	-0.0892495
79396	16.012	0.3954	-0.0044		8.38807	3.96192	-0.0892495
79597	16.09	0.3966	-0.0042		8.42893	3.97395	-0.0851927
79797	16.164	0.3976	-0.0042		8.46769	3.98397	-0.0851927
79998	16.244	0.3985	-0.0042		8.5096	3.99299	-0.0851927
80198	16.332	0.3995	-0.0043		8.5557	4.00301	-0.0872211
80398	16.426	0.4005	-0.0047		8.60494	4.01303	-0.0953347
80599	16.518	0.4019	-0.0045		8.65314	4.02705	-0.0912779
80799	16.608	0.4029	-0.0044		8.70029	4.03707	-0.0892495
81000	16.692	0.404	-0.0041		8.74429	4.0481	-0.0831643
81200	16.78	0.4051	-0.0041		8.79039	4.05912	-0.0831643
81400	16.86	0.4061	-0.0041		8.8323	4.06914	-0.0831643
81601	16.942	0.4071	-0.004		8.87526	4.07916	-0.0811359
81801	17.022	0.4081	-0.004		8.91717	4.08918	-0.0811359
82003	17.102	0.4091	-0.004		8.95908	4.0992	-0.0811359
82204	17.18	0.4101	-0.0039		8.99994	4.10922	-0.0791075
82404	17.258	0.411	-0.0039		9.0408	4.11824	-0.0791075
82604	17.336	0.4122	-0.0039		9.08166	4.13026	-0.0791075
82805	17.414	0.4131	-0.0038		9.12252	4.13928	-0.0770791
83005	17.49	0.4139	-0.0038		9.16233	4.14729	-0.0770791
83206	17.568	0.4149	-0.0036		9.20319	4.15731	-0.0730223
83406	17.646	0.4158	-0.0037		9.24406	4.16633	-0.0750507
83606	17.726	0.4169	-0.0037		9.28596	4.17735	-0.0750507
83807	17.804	0.4178	-0.0036		9.32683	4.18637	-0.0730223
84007	17.88	0.4188	-0.0036		9.36664	4.19639	-0.0730223
84208	17.96	0.4197	-0.0036		9.40855	4.20541	-0.0730223
84408	18.04	0.4207	-0.0035		9.45046	4.21543	-0.0709939
84608	18.118	0.4218	-0.0034		9.49132	4.22645	-0.0689655
84809	18.2	0.4226	-0.0034		9.53427	4.23447	-0.0689655
85009	18.28	0.4236	-0.0034		9.57618	4.24449	-0.0689655
85211	18.358	0.4246	-0.0034		9.61704	4.25451	-0.0689655
85412	18.44	0.4256	-0.0033		9.66	4.26453	-0.0669371
85612	18.522	0.4267	-0.0032		9.70296	4.27555	-0.0649087
85813	18.602	0.4276	-0.0032		9.74487	4.28457	-0.0649087
86013	18.684	0.4286	-0.0031		9.78782	4.29459	-0.0628803
86213	18.77	0.4295	-0.0031		9.83288	4.30361	-0.0628803
86414	18.854	0.4306	-0.0031		9.87688	4.31463	-0.0628803
86614	18.94	0.4315	-0.0031		9.92193	4.32365	-0.0628803
86814	19.026	0.4325	-0.003		9.96698	4.33367	-0.0608519
87015	19.12	0.4337	-0.003		10.0162	4.34569	-0.0608519
87215	19.208	0.4348	-0.0029		10.0623	4.35671	-0.0588235
87416	19.298	0.4358	-0.0027		10.1095	4.36673	-0.0547667
87616	19.388	0.4366	-0.0026		10.1566	4.37475	-0.0527383
87816	19.474	0.4377	-0.0026		10.2017	4.38577	-0.0527383
88017	19.558	0.4387	-0.0028		10.2457	4.39579	-0.0567951
88217	19.642	0.4398	-0.0028		10.2897	4.40681	-0.0567951
88419	19.726	0.4408	-0.0027		10.3337	4.41683	-0.0547667
88620	19.812	0.4418	-0.0026		10.3787	4.42685	-0.0527383
88820	19.894	0.4428	-0.0025		10.4217	4.43687	-0.0507099
89021	19.974	0.4438	-0.0025		10.4636	4.44689	-0.0507099
89221	20.058	0.4447	-0.0025		10.5076	4.45591	-0.0507099
89421	20.14	0.4455	-0.0024		10.5506	4.46393	-0.0486815
89622	20.222	0.4466	-0.0024		10.5935	4.47495	-0.0486815
89822	20.31	0.4476	-0.0024		10.6396	4.48497	-0.0486815
90022	20.398	0.4487	-0.0023		10.6857	4.49599	-0.0466531
90223	20.484	0.4499	-0.0023		10.7308	4.50802	-0.0466531
90423	20.566	0.4508	-0.0021		10.7737	4.51703	-0.0425963
90624	20.652	0.4517	-0.0022		10.8188	4.52605	-0.0446247
90824	20.738	0.4527	-0.0021		10.8638	4.53607	-0.0425963
91024	20.826	0.4537	-0.002		10.9099	4.54609	-0.040568
91225	20.912	0.4549	-0.002		10.955	4.55812	-0.040568
91425	20.992	0.4556	-0.0019		10.9969	4.56513	-0.0385396
91627	21.076	0.4567	-0.0017		11.0409	4.57615	-0.0344828
91828	21.162	0.4577	-0.002		11.086	4.58617	-0.040568
92028	21.25	0.4586	-0.0019		11.1321	4.59519	-0.0385396
92229	21.334	0.4596	-0.0017		11.1761	4.60521	-0.0344828
92429	21.42	0.4606	-0.0017		11.2211	4.61523	-0.0344828
92629	21.508	0.4616	-0.0015		11.2672	4.62525	-0.030426
92830	21.598	0.4627	-0.0017		11.3144	4.63627	-0.0344828
93030	21.69	0.4636	-0.0015		11.3626	4.64529	-0.030426
93230	21.78	0.4647	-0.0015		11.4097	4.65631	-0.030426
93431	21.868	0.4657	-0.0015		11.4558	4.66633	-0.030426
93631	21.958	0.4666	-0.0015		11.5029	4.67535	-0.030426
93832	22.044	0.4679	-0.0015		11.548	4.68838	-0.030426
94032	22.128	0.4688	-0.0014		11.592	4.69739	-0.0283976
94232	22.216	0.47	-0.0013		11.6381	4.70942	-0.0263692
94433	22.298	0.4708	-0.0013		11.6811	4.71743	-0.0263692
94633	22.384	0.4718	-0.0013		11.7261	4.72745	-0.0263692
94835	22.466	0.4728	-0.0012		11.7691	4.73747	-0.0243408
95036	22.55	0.4737	-0.0012		11.8131	4.74649	-0.0243408
95236	22.632	0.4747	-0.0012		11.856	4.75651	-0.0243408
95437	22.722	0.4757	-0.0011		11.9032	4.76653	-0.0223124
95637	22.812	0.4767	-0.0011		11.9503	4.77655	-0.0223124
95837	22.9	0.4778	-0.001		11.9964	4.78758	-0.020284
96038	22.988	0.4787	-0.001		12.0425	4.79659	-0.020284
96238	23.076	0.4798	-0.0009		12.0886	4.80762	-0.0182556
96438	23.164	0.4808	-0.0009		12.1347	4.81764	-0.0182556
96639	23.25	0.4817	-0.0009		12.1798	4.82665	-0.0182556
96839	23.338	0.4828	-0.0008		12.2259	4.83768	-0.0162272
97040	23.426	0.4838	-0.0008		12.272	4.8477	-0.0162272
97240	23.518	0.4849	-0.0007		12.3202	4.85872	-0.0141988
97440	23.606	0.4858	-0.0006		12.3663	4.86774	-0.0121704
97641	23.692	0.4868	-0.0005		12.4113	4.87776	-0.010142
97841	23.782	0.4878	-0.0006		12.4585	4.88778	-0.0121704
98043	23.868	0.4888	-0.0005		12.5035	4.8978	-0.010142
98244	23.956	0.4899	-0.0002		12.5496	4.90882	-0.0040568
98444	24.042	0.4909	-0.0002		12.5947	4.91884	-0.0040568
98645	24.124	0.4919	-0.0002		12.6376	4.92886	-0.0040568
98845	24.21	0.4929	-0.0001		12.6827	4.93888	-0.0020284
99045	24.294	0.4939	-0.0002		12.7267	4.9489	-0.0040568
99246	24.378	0.4947	-0.0001		12.7707	4.95691	-0.0020284
99446	24.462	0.4956	0		12.8147	4.96593	0
99646	24.55	0.4968	-0.0001		12.8608	4.97796	-0.0020284
99847	24.638	0.4978	-0.0001		12.9069	4.98798	-0.0020284
100047	24.726	0.4988	0.0001		12.953	4.998	0.0020284
100248	24.81	0.4997	0.0002		12.997	5.00701	0.0040568
100448	24.898	0.5008	0.0002		13.0431	5.01804	0.0040568
100648	24.982	0.5016	0.0002		13.0871	5.02605	0.0040568
100849	25.066	0.5027	0.0003		13.1311	5.03707	0.00608519
101049	25.152	0.5037	0.0002		13.1762	5.04709	0.0040568
101250	25.238	0.5046	0.0002		13.2212	5.05611	0.0040568
101450	25.326	0.5057	0.0003		13.2673	5.06713	0.00608519
101650	25.416	0.5067	0.0003		13.3145	5.07715	0.00608519
101851	25.506	0.5077	0.0004		13.3616	5.08717	0.00811359
102051	25.59	0.5087	0.0003		13.4056	5.09719	0.00608519
102253	25.678	0.5097	0.0004		13.4517	5.10721	0.00811359
102454	25.768	0.5107	0.0006		13.4989	5.11723	0.0121704
102654	25.856	0.5117	0.0006		13.545	5.12725	0.0121704
102854	25.948	0.5128	0.0006		13.5932	5.13828	0.0121704
103055	26.03	0.5138	0.0005		13.6361	5.1483	0.010142
103255	26.124	0.5148	0.0006		13.6854	5.15832	0.0121704
103456	26.214	0.5158	0.0007		13.7325	5.16834	0.0141988
103656	26.306	0.5167	0.0008		13.7807	5.17735	0.0162272
103856	26.39	0.5179	0.0008		13.8247	5.18938	0.0162272
104057	26.478	0.5189	0.0009		13.8708	5.1994	0.0182556
104257	26.566	0.5198	0.0009		13.9169	5.20842	0.0182556
104458	26.65	0.5208	0.0009		13.9609	5.21844	0.0182556
104658	26.736	0.5218	0.001		14.006	5.22846	0.020284
104858	26.816	0.5227	0.001		14.0479	5.23747	0.020284
105059	26.896	0.5236	0.001		14.0898	5.24649	0.020284
105259	26.984	0.5247	0.0011		14.1359	5.25752	0.0223124
105461	27.074	0.5256	0.0011		14.183	5.26653	0.0223124
105662	27.192	0.5268	0.0012		14.2448	5.27856	0.0243408
105862	27.304	0.5282	0.0013		14.3035	5.29259	0.0263692
106063	27.402	0.5293	0.0013		14.3548	5.30361	0.0263692
106263	27.498	0.5303	0.0014		14.4051	5.31363	0.0283976
106463	27.59	0.5314	0.0014		14.4533	5.32465	0.0283976
106664	27.678	0.5324	0.0015		14.4994	5.33467	0.030426
106864	27.764	0.5333	0.0015		14.5445	5.34369	0.030426
107064	27.848	0.5345	0.0015		14.5885	5.35571	0.030426
107265	27.93	0.5354	0.0017		14.6314	5.36473	0.0344828
107465	28.008	0.5364	0.0015		14.6723	5.37475	0.030426
107666	28.09	0.5374	0.0017		14.7153	5.38477	0.0344828
107866	28.168	0.5383	0.0017		14.7561	5.39379	0.0344828
108066	28.25	0.5391	0.0017		14.7991	5.4018	0.0344828
108267	28.336	0.5401	0.0017		14.8441	5.41182	0.0344828
108467	28.416	0.5413	0.0018		14.886	5.42385	0.0365112
108669	28.498	0.5421	0.0018		14.929	5.43186	0.0365112
108870	28.58	0.5431	0.002		14.972	5.44188	0.040568
109070	28.662	0.5441	0.002		15.0149	5.4519	0.040568
109271	28.746	0.5451	0.002		15.0589	5.46192	0.040568
109471	28.83	0.5459	0.0021		15.1029	5.46994	0.0425963
109671	28.914	0.5468	0.0022		15.1469	5.47896	0.0446247
109872	29	0.5479	0.0022		15.192	5.48998	0.0446247
110072	29.084	0.5489	0.0022		15.236	5.5	0.0446247
110272	29.164	0.5498	0.0024		15.2779	5.50902	0.0486815
110473	29.254	0.5509	0.0022		15.325	5.52004	0.0446247
110673	29.334	0.5518	0.0025		15.3669	5.52906	0.0507099
110874	29.422	0.5529	0.0023		15.413	5.54008	0.0466531
111074	29.508	0.5537	0.0025		15.4581	5.5481	0.0507099
111274	29.594	0.5548	0.0025		15.5032	5.55912	0.0507099
111475	29.678	0.5557	0.0025		15.5472	5.56814	0.0507099
111675	29.764	0.5568	0.0025		15.5922	5.57916	0.0507099
111877	29.848	0.5577	0.0026		15.6362	5.58818	0.0527383
112078	29.932	0.5587	0.0026		15.6802	5.5982	0.0527383
112278	30.018	0.5596	0.0026		15.7253	5.60721	0.0527383
112479	30.108	0.5606	0.0027		15.7724	5.61723	0.0547667
112679	30.204	0.5616	0.0027		15.8227	5.62725	0.0547667
112879	30.3	0.5627	0.0028		15.873	5.63828	0.0567951
113080	30.39	0.5638	0.0029		15.9201	5.6493	0.0588235
113280	30.482	0.5648	0.0028		15.9683	5.65932	0.0567951
113480	30.57	0.5658	0.0029		16.0144	5.66934	0.0588235
113681	30.662	0.5667	0.0029		16.0626	5.67836	0.0588235
113881	30.748	0.5677	0.003		16.1077	5.68838	0.0608519
114082	30.84	0.5689	0.0031		16.1559	5.7004	0.0628803
114282	30.924	0.5699	0.0031		16.1999	5.71042	0.0628803
114482	31.008	0.5709	0.0032		16.2439	5.72044	0.0649087
114683	31.092	0.5719	0.0031		16.2879	5.73046	0.0628803
114883	31.176	0.5728	0.0031		16.3319	5.73948	0.0628803
115085	31.262	0.5737	0.0033		16.377	5.7485	0.0669371
115286	31.348	0.5747	0.0033		16.422	5.75852	0.0669371
115486	31.436	0.5758	0.0033		16.4681	5.76954	0.0669371
115687	31.526	0.5769	0.0034		16.5152	5.78056	0.0689655
115887	31.614	0.5779	0.0034		16.5613	5.79058	0.0689655
116087	31.704	0.5789	0.0035		16.6085	5.8006	0.0709939
116288	31.79	0.5797	0.0034		16.6535	5.80862	0.0689655
116488	31.874	0.5807	0.0036		16.6976	5.81864	0.0730223
116688	31.968	0.5817	0.0035		16.7468	5.82866	0.0709939
116889	32.06	0.5827	0.0036		16.795	5.83868	0.0730223
117089	32.156	0.5839	0.0037		16.8453	5.8507	0.0750507
117290	32.246	0.5849	0.0036		16.8924	5.86072	0.0730223
117490	32.336	0.5859	0.0037		16.9396	5.87074	0.0750507
117690	32.424	0.5869	0.0038		16.9857	5.88076	0.0770791
117891	32.51	0.5879	0.0038		17.0307	5.89078	0.0770791
118091	32.596	0.589	0.0039		17.0758	5.9018	0.0791075
118293	32.684	0.59	0.0039		17.1219	5.91182	0.0791075
118494	32.774	0.591	0.004		17.169	5.92184	0.0811359
118694	32.858	0.592	0.0041		17.213	5.93186	0.0831643
118895	32.936	0.5929	0.0041		17.2539	5.94088	0.0831643
119095	33.02	0.5939	0.0041		17.2979	5.9509	0.0831643
119295	33.098	0.5948	0.0041		17.3388	5.95992	0.0831643
119496	33.186	0.5958	0.0042		17.3849	5.96994	0.0851927
119696	33.272	0.5967	0.0042		17.4299	5.97896	0.0851927
119896	33.356	0.5977	0.0043		17.4739	5.98898	0.0872211
120097	33.44	0.5987	0.0043		17.5179	5.999	0.0872211
120297	33.524	0.5997	0.0044		17.5619	6.00902	0.0892495
120498	33.61	0.6007	0.0044		17.607	6.01904	0.0892495
120698	33.7	0.6018	0.0047		17.6541	6.03006	0.0953347
120898	33.782	0.6028	0.0047		17.6971	6.04008	0.0953347
121099	33.878	0.6039	0.0048		17.7474	6.0511	0.0973631
121299	33.962	0.6047	0.0046		17.7914	6.05912	0.0933063
121500	34.052	0.6058	0.0046		17.8385	6.07014	0.0933063
121700	34.144	0.6069	0.0048		17.8867	6.08116	0.0973631
121900	34.232	0.6078	0.0047		17.9328	6.09018	0.0953347
122101	34.32	0.6089	0.0048		17.9789	6.1012	0.0973631
122301	34.406	0.6097	0.0048		18.024	6.10922	0.0973631
122503	34.496	0.6108	0.0048		18.0711	6.12024	0.0973631
122704	34.588	0.6118	0.0048		18.1193	6.13026	0.0973631
122904	34.674	0.6128	0.005		18.1644	6.14028	0.10142
123104	34.764	0.6138	0.0049		18.2115	6.1503	0.0993915
123305	34.848	0.6149	0.005		18.2555	6.16132	0.10142
123505	34.938	0.6158	0.0051		18.3027	6.17034	0.103448
123706	35.028	0.6167	0.0051		18.3498	6.17936	0.103448
123906	35.118	0.6178	0.0051		18.397	6.19038	0.103448
124106	35.214	0.6188	0.0052		18.4473	6.2004	0.105477
124307	35.302	0.6198	0.0052		18.4934	6.21042	0.105477
124507	35.394	0.6209	0.0052		18.5415	6.22144	0.105477
124708	35.482	0.6219	0.0053		18.5876	6.23146	0.107505
124908	35.568	0.6229	0.0053		18.6327	6.24148	0.107505
125108	35.65	0.6239	0.0053		18.6757	6.2515	0.107505
125309	35.736	0.6248	0.0054		18.7207	6.26052	0.109533
125509	35.824	0.6258	0.0055		18.7668	6.27054	0.111562
125711	35.912	0.6268	0.0055		18.8129	6.28056	0.111562
125912	35.998	0.6278	0.0056		18.858	6.29058	0.11359
126112	36.084	0.6289	0.0056		18.903	6.3016	0.11359
126313	36.168	0.6298	0.0056		18.947	6.31062	0.11359
126513	36.252	0.6307	0.0057		18.991	6.31964	0.115619
126713	36.346	0.6318	0.0058		19.0403	6.33066	0.117647
126914	36.436	0.6328	0.0058		19.0874	6.34068	0.117647
127114	36.53	0.6339	0.0059		19.1367	6.3517	0.119675
127314	36.618	0.6349	0.0059		19.1828	6.36172	0.119675
127515	36.708	0.6359	0.0059		19.2299	6.37174	0.119675
127715	36.794	0.6369	0.0061		19.275	6.38176	0.123732
127916	36.878	0.6378	0.006		19.319	6.39078	0.121704
128116	36.966	0.6387	0.0061		19.3651	6.3998	0.123732
128316	37.05	0.6398	0.0062		19.4091	6.41082	0.125761
128517	37.142	0.6407	0.0061		19.4573	6.41984	0.123732
128717	37.23	0.6418	0.0064		19.5034	6.43086	0.129817
128919	37.32	0.6428	0.0064		19.5505	6.44088	0.129817
129120	37.408	0.6438	0.0065		19.5966	6.4509	0.131846
129320	37.494	0.6449	0.0066		19.6417	6.46192	0.133874
129521	37.584	0.6457	0.0065		19.6888	6.46994	0.131846
129721	37.672	0.6468	0.0066		19.7349	6.48096	0.133874
129921	37.768	0.6478	0.0067		19.7852	6.49098	0.135903
130122	37.86	0.6489	0.0067		19.8334	6.502	0.135903
130322	37.948	0.6498	0.0068		19.8795	6.51102	0.137931
130522	38.034	0.6509	0.0069		19.9245	6.52204	0.139959
130723	38.12	0.6519	0.0069		19.9696	6.53206	0.139959
130923	38.208	0.6528	0.0069		20.0157	6.54108	0.139959
131124	38.298	0.6539	0.007		20.0628	6.5521	0.141988
131324	38.382	0.6548	0.0069		20.1068	6.56112	0.139959
131524	38.47	0.6558	0.0071		20.1529	6.57114	0.144016
131725	38.556	0.6568	0.0069		20.198	6.58116	0.139959
131925	38.642	0.6579	0.0071		20.243	6.59218	0.144016
132127	38.726	0.6589	0.007		20.2871	6.6022	0.141988
132328	38.814	0.6598	0.0072		20.3332	6.61122	0.146045
132528	38.902	0.6608	0.0073		20.3793	6.62124	0.148073
132729	38.99	0.6617	0.0073		20.4254	6.63026	0.148073
132929	39.08	0.6628	0.0074		20.4725	6.64128	0.150101
133129	39.166	0.6639	0.0072		20.5175	6.6523	0.146045
133330	39.252	0.6648	0.0073		20.5626	6.66132	0.148073
133530	39.34	0.6659	0.0074		20.6087	6.67234	0.150101
133730	39.428	0.6667	0.0074		20.6548	6.68036	0.150101
133931	39.522	0.6679	0.0074		20.704	6.69238	0.150101
134131	39.612	0.6688	0.0075		20.7512	6.7014	0.15213
134332	39.702	0.6699	0.0075		20.7983	6.71242	0.15213
134532	39.788	0.6709	0.0075		20.8434	6.72244	0.15213
134732	39.872	0.672	0.0076		20.8874	6.73347	0.154158
134933	39.958	0.673	0.0076		20.9324	6.74349	0.154158
135133	40.046	0.6738	0.0078		20.9785	6.7515	0.158215
135335	40.136	0.6749	0.0078		21.0257	6.76253	0.158215
135536	40.224	0.6759	0.0078		21.0718	6.77255	0.158215
135736	40.31	0.6769	0.0078		21.1168	6.78257	0.158215
135937	40.394	0.6779	0.008		21.1609	6.79259	0.162272
136137	40.476	0.6788	0.0079		21.2038	6.8016	0.160243
136337	40.558	0.6798	0.008		21.2468	6.81162	0.162272
136538	40.638	0.6807	0.008		21.2887	6.82064	0.162272
136738	40.728	0.6818	0.0081		21.3358	6.83166	0.1643
136938	40.812	0.6827	0.0081		21.3798	6.84068	0.1643
137139	40.898	0.6837	0.0081		21.4249	6.8507	0.1643
137339	40.986	0.6847	0.0081		21.471	6.86072	0.1643
137540	41.074	0.6857	0.0082		21.5171	6.87074	0.166329
137740	41.162	0.6867	0.0083		21.5632	6.88076	0.168357
137940	41.256	0.6876	0.0084		21.6124	6.88978	0.170385
138141	41.352	0.6888	0.0084		21.6627	6.9018	0.170385
138341	41.446	0.6898	0.0084		21.712	6.91182	0.170385
138543	41.54	0.6908	0.0084		21.7612	6.92184	0.170385
138744	41.63	0.692	0.0085		21.8083	6.93387	0.172414
138944	41.716	0.6931	0.0085		21.8534	6.94489	0.172414
139145	41.802	0.6941	0.0086		21.8984	6.95491	0.174442
139345	41.884	0.695	0.0087		21.9414	6.96393	0.176471
139545	41.97	0.696	0.0087		21.9865	6.97395	0.176471
139746	42.052	0.6969	0.0087		22.0294	6.98297	0.176471
139946	42.138	0.6979	0.0087		22.0745	6.99299	0.176471
140146	42.222	0.6989	0.0088		22.1185	7.00301	0.178499
140347	42.304	0.6999	0.0088		22.1614	7.01303	0.178499
140547	42.386	0.7009	0.0089		22.2044	7.02305	0.180527
140748	42.47	0.7019	0.0089		22.2484	7.03307	0.180527
140948	42.566	0.7028	0.009		22.2987	7.04208	0.182556
141148	42.66	0.7038	0.009		22.3479	7.0521	0.182556
141349	42.754	0.7049	0.009		22.3972	7.06313	0.182556
141549	42.842	0.706	0.0091		22.4433	7.07415	0.184584
141750	42.928	0.7069	0.0091		22.4883	7.08317	0.184584
141950	43.012	0.708	0.0091		22.5323	7.09419	0.184584
142150	43.096	0.709	0.0091		22.5763	7.10421	0.184584
142351	43.18	0.7099	0.0092		22.6203	7.11323	0.186613
142551	43.264	0.7108	0.0092		22.6643	7.12224	0.186613
142753	43.35	0.712	0.0094		22.7094	7.13427	0.190669
142954	43.438	0.7129	0.0093		22.7555	7.14329	0.188641
143154	43.526	0.7139	0.0093		22.8016	7.15331	0.188641
143354	43.612	0.715	0.0094		22.8466	7.16433	0.190669
143555	43.704	0.716	0.0094		22.8948	7.17435	0.190669
143755	43.796	0.7171	0.0094		22.943	7.18537	0.190669
143956	43.882	0.718	0.0096		22.9881	7.19439	0.194726
144156	43.966	0.719	0.0096		23.0321	7.20441	0.194726
144356	44.054	0.72	0.0095		23.0782	7.21443	0.192698
144557	44.138	0.721	0.0096		23.1222	7.22445	0.194726
144757	44.22	0.7219	0.0096		23.1651	7.23347	0.194726
144958	44.302	0.723	0.0097		23.2081	7.24449	0.196755
145158	44.382	0.7239	0.0096		23.25	7.25351	0.194726
145358	44.474	0.7249	0.0096		23.2982	7.26353	0.194726
145559	44.562	0.7259	0.0097		23.3443	7.27355	0.196755
145759	44.646	0.727	0.0097		23.3883	7.28457	0.196755
145961	44.734	0.7279	0.0098		23.4344	7.29359	0.198783
146162	44.824	0.7289	0.0099		23.4816	7.30361	0.200811
146362	44.902	0.7299	0.0098		23.5224	7.31363	0.198783
146563	44.982	0.7309	0.0099		23.5643	7.32365	0.200811
146763	45.066	0.7318	0.0099		23.6083	7.33267	0.200811
146963	45.152	0.7328	0.0099		23.6534	7.34269	0.200811
147164	45.236	0.7338	0.01		23.6974	7.35271	0.20284
147364	45.322	0.7349	0.01		23.7424	7.36373	0.20284
147564	45.404	0.7359	0.01		23.7854	7.37375	0.20284
147765	45.49	0.7369	0.0101		23.8304	7.38377	0.204868
147965	45.572	0.7381	0.0101		23.8734	7.39579	0.204868
148166	45.656	0.7388	0.0101		23.9174	7.40281	0.204868
148366	45.744	0.7399	0.0102		23.9635	7.41383	0.206897
148566	45.828	0.7408	0.0102		24.0075	7.42285	0.206897
148767	45.912	0.7418	0.0103		24.0515	7.43287	0.208925
148967	45.996	0.743	0.0102		24.0955	7.44489	0.206897
149169	46.074	0.7438	0.0102		24.1364	7.45291	0.206897
149370	46.158	0.7448	0.0103		24.1804	7.46293	0.208925
149570	46.242	0.7459	0.0103		24.2244	7.47395	0.208925
149771	46.324	0.7467	0.0105		24.2673	7.48196	0.212982
149971	46.41	0.7476	0.0104		24.3124	7.49098	0.210953
150171	46.512	0.7488	0.0105		24.3658	7.50301	0.212982
150372	46.618	0.75	0.0105		24.4214	7.51503	0.212982
150572	46.72	0.751	0.0105		24.4748	7.52505	0.212982
150772	46.816	0.7521	0.0105		24.5251	7.53607	0.212982
150973	46.906	0.7531	0.0108		24.5722	7.54609	0.219067
151173	46.996	0.7543	0.0106		24.6194	7.55812	0.21501
151374	47.082	0.7552	0.0108		24.6644	7.56713	0.219067
151574	47.164	0.7563	0.0107		24.7074	7.57816	0.217039
151774	47.248	0.7573	0.0107		24.7514	7.58818	0.217039
151975	47.328	0.7583	0.0108		24.7933	7.5982	0.219067
152175	47.406	0.7592	0.0108		24.8342	7.60721	0.219067
152377	47.484	0.7602	0.0108		24.875	7.61723	0.219067
152578	47.57	0.7611	0.0109		24.9201	7.62625	0.221095
152778	47.654	0.7619	0.0108		24.9641	7.63427	0.219067
152979	47.738	0.7631	0.011		25.0081	7.64629	0.223124
153179	47.814	0.7639	0.0109		25.0479	7.65431	0.221095
153379	47.894	0.765	0.0111		25.0898	7.66533	0.225152
153580	47.974	0.7659	0.0112		25.1317	7.67435	0.227181
153780	48.054	0.7669	0.0111		25.1736	7.68437	0.225152
153980	48.136	0.7678	0.0111		25.2166	7.69339	0.225152
154181	48.22	0.7688	0.0113		25.2606	7.70341	0.229209
154381	48.308	0.77	0.0114		25.3067	7.71543	0.231237
154582	48.398	0.7709	0.0114		25.3538	7.72445	0.231237
154782	48.486	0.772	0.0114		25.3999	7.73547	0.231237
154982	48.572	0.773	0.0115		25.445	7.74549	0.233266
155183	48.654	0.774	0.0115		25.4879	7.75551	0.233266
155383	48.738	0.775	0.0114		25.5319	7.76553	0.231237
155585	48.82	0.7759	0.0114		25.5749	7.77455	0.231237
155786	48.908	0.7769	0.0116		25.621	7.78457	0.235294
155986	48.994	0.7781	0.0116		25.6661	7.79659	0.235294
156187	49.078	0.779	0.0117		25.7101	7.80561	0.237323
156387	49.16	0.7801	0.0117		25.753	7.81663	0.237323
156587	49.242	0.781	0.0118		25.796	7.82565	0.239351
156788	49.322	0.782	0.0119		25.8379	7.83567	0.241379
156988	49.402	0.7829	0.0118		25.8798	7.84469	0.239351
157188	49.48	0.784	0.0119		25.9207	7.85571	0.241379
157389	49.564	0.7848	0.012		25.9647	7.86373	0.243408
157589	49.642	0.7858	0.0119		26.0055	7.87375	0.241379
157790	49.726	0.7868	0.0119		26.0495	7.88377	0.241379
157990	49.804	0.7879	0.012		26.0904	7.89479	0.243408
158190	49.886	0.7888	0.012		26.1333	7.90381	0.243408
158391	49.968	0.7898	0.0121		26.1763	7.91383	0.245436
158591	50.052	0.7907	0.0119		26.2203	7.92285	0.241379
158793	50.158	0.7919	0.012		26.2758	7.93487	0.243408
158994	50.264	0.7931	0.0122		26.3314	7.94689	0.247465
159194	50.358	0.7943	0.0121		26.3806	7.95892	0.245436
159395	50.446	0.7953	0.0123		26.4267	7.96894	0.249493
159595	50.534	0.7963	0.0121		26.4728	7.97896	0.245436
159795	50.616	0.7975	0.0123		26.5158	7.99098	0.249493
159996	50.702	0.7982	0.0124		26.5608	7.998	0.251521
160196	50.784	0.7993	0.0124		26.6038	8.00902	0.251521
160396	50.864	0.8002	0.0123		26.6457	8.01804	0.249493
160597	50.944	0.8013	0.0123		26.6876	8.02906	0.249493
160797	51.022	0.8024	0.0125		26.7284	8.04008	0.25355
160998	51.098	0.8033	0.0125		26.7683	8.0491	0.25355
161198	51.174	0.8043	0.0126		26.8081	8.05912	0.255578
161398	51.252	0.8052	0.0126		26.8489	8.06814	0.255578
161599	51.328	0.8062	0.0127		26.8888	8.07816	0.257606
161799	51.406	0.8071	0.0127		26.9296	8.08717	0.257606
162000	51.486	0.8081	0.0128		26.9715	8.09719	0.259635
162200	51.562	0.8092	0.0126		27.0113	8.10822	0.255578
162400	51.638	0.8101	0.0128		27.0511	8.11723	0.259635
162601	51.718	0.811	0.0128		27.0931	8.12625	0.259635
162801	51.796	0.8119	0.0129		27.1339	8.13527	0.261663
163003	51.874	0.8129	0.0127		27.1748	8.14529	0.257606
163204	51.954	0.8138	0.013		27.2167	8.15431	0.263692
163404	52.036	0.8149	0.013		27.2596	8.16533	0.263692
163604	52.118	0.8158	0.0129		27.3026	8.17435	0.261663
163805	52.204	0.8168	0.0129		27.3477	8.18437	0.261663
164005	52.294	0.8181	0.0129		27.3948	8.19739	0.261663
164206	52.38	0.8189	0.0131		27.4399	8.20541	0.26572
164406	52.462	0.8201	0.013		27.4828	8.21743	0.263692
164606	52.542	0.8209	0.013		27.5247	8.22545	0.263692
164807	52.626	0.822	0.013		27.5687	8.23647	0.263692
165007	52.708	0.823	0.0132		27.6117	8.24649	0.267748
165208	52.79	0.824	0.0132		27.6546	8.25651	0.267748
165408	52.868	0.8248	0.0131		27.6955	8.26453	0.26572
165608	52.95	0.826	0.0133		27.7385	8.27655	0.269777
165809	53.028	0.8269	0.0132		27.7793	8.28557	0.267748
166009	53.108	0.8279	0.0133		27.8212	8.29559	0.269777
166211	53.196	0.8289	0.0134		27.8673	8.30561	0.271805
166412	53.278	0.8299	0.0134		27.9103	8.31563	0.271805
166612	53.362	0.8309	0.0133		27.9543	8.32565	0.269777
166813	53.44	0.832	0.0134		27.9951	8.33667	0.271805
167013	53.522	0.833	0.0134		28.0381	8.34669	0.271805
167213	53.6	0.8339	0.0135		28.079	8.35571	0.273834
167414	53.676	0.8351	0.0135		28.1188	8.36774	0.273834
167614	53.758	0.8358	0.0137		28.1617	8.37475	0.27789
167814	53.836	0.8368	0.0137		28.2026	8.38477	0.27789
168015	53.916	0.8378	0.0137		28.2445	8.39479	0.27789
168215	53.996	0.8388	0.0137		28.2864	8.40481	0.27789
168416	54.08	0.8398	0.0139		28.3304	8.41483	0.281947
168616	54.168	0.8409	0.014		28.3765	8.42585	0.283976
168816	54.264	0.8419	0.0139		28.4268	8.43587	0.281947
169017	54.352	0.843	0.0139		28.4729	8.44689	0.281947
169217	54.44	0.844	0.0141		28.519	8.45691	0.286004
169419	54.526	0.8451	0.014		28.5641	8.46794	0.283976
169620	54.61	0.8461	0.0141		28.6081	8.47796	0.286004
169820	54.69	0.8473	0.014		28.65	8.48998	0.283976
170021	54.77	0.8481	0.0141		28.6919	8.498	0.286004
170221	54.848	0.8492	0.014		28.7327	8.50902	0.283976
170421	54.924	0.8503	0.0141		28.7726	8.52004	0.286004
170622	55	0.851	0.0143		28.8124	8.52705	0.290061
170822	55.08	0.852	0.0144		28.8543	8.53707	0.292089
171022	55.162	0.8531	0.0144		28.8972	8.5481	0.292089
171223	55.244	0.854	0.0145		28.9402	8.55711	0.294118
171423	55.326	0.8551	0.0146		28.9831	8.56814	0.296146
171624	55.404	0.8561	0.0144		29.024	8.57816	0.292089
171824	55.48	0.857	0.0147		29.0638	8.58717	0.298174
172024	55.56	0.8581	0.0147		29.1057	8.5982	0.298174
172225	55.638	0.859	0.0147		29.1466	8.60721	0.298174
172425	55.72	0.86	0.0148		29.1895	8.61723	0.300203
172627	55.802	0.8611	0.0147		29.2325	8.62826	0.298174
172828	55.878	0.8619	0.0147		29.2723	8.63627	0.298174
173028	55.956	0.863	0.0148		29.3132	8.64729	0.300203
173229	56.032	0.8639	0.0148		29.353	8.65631	0.300203
173429	56.112	0.8649	0.0148		29.3949	8.66633	0.300203
173629	56.192	0.8659	0.0149		29.4368	8.67635	0.302231
173830	56.272	0.8668	0.0148		29.4787	8.68537	0.300203
174030	56.352	0.8679	0.015		29.5206	8.69639	0.30426
174230	56.432	0.8691	0.015		29.5625	8.70842	0.30426
174431	56.512	0.8701	0.015		29.6044	8.71844	0.30426
174631	56.592	0.8711	0.015		29.6464	8.72846	0.30426
174832	56.67	0.8721	0.0151		29.6872	8.73848	0.306288
175032	56.75	0.8731	0.0152		29.7291	8.7485	0.308316
175232	56.824	0.874	0.0152		29.7679	8.75752	0.308316
175433	56.898	0.8748	0.0152		29.8067	8.76553	0.308316
175633	56.98	0.876	0.0152		29.8496	8.77756	0.308316
175835	57.076	0.877	0.0153		29.8999	8.78758	0.310345
176036	57.164	0.878	0.0154		29.946	8.7976	0.312373
176236	57.256	0.8792	0.0154		29.9942	8.80962	0.312373
176437	57.338	0.8802	0.0154		30.0372	8.81964	0.312373
176637	57.422	0.8812	0.0154		30.0812	8.82966	0.312373
176837	57.5	0.8822	0.0155		30.122	8.83968	0.314402
177038	57.582	0.8833	0.0156		30.165	8.8507	0.31643
177238	57.656	0.8843	0.0156		30.2037	8.86072	0.31643
177438	57.734	0.8853	0.0156		30.2446	8.87074	0.31643
177639	57.808	0.8862	0.0157		30.2834	8.87976	0.318458
177839	57.884	0.8872	0.0158		30.3232	8.88978	0.320487
178040	57.96	0.8881	0.0158		30.363	8.8988	0.320487
178240	58.032	0.8892	0.0157		30.4007	8.90982	0.318458
178440	58.106	0.8901	0.0159		30.4395	8.91884	0.322515
178641	58.18	0.891	0.0159		30.4782	8.92786	0.322515
178841	58.258	0.8921	0.016		30.5191	8.93888	0.324544
179043	58.34	0.893	0.0159		30.5621	8.9479	0.322515
179244	58.418	0.894	0.016		30.6029	8.95792	0.324544
179444	58.494	0.8951	0.016		30.6427	8.96894	0.324544
179645	58.568	0.896	0.0162		30.6815	8.97796	0.3286
179845	58.642	0.897	0.0161		30.7203	8.98798	0.326572
180045	58.718	0.898	0.0162		30.7601	8.998	0.3286
180246	58.792	0.8988	0.0162		30.7989	9.00601	0.3286
180446	58.872	0.8999	0.0163		30.8408	9.01703	0.330629
180646	58.946	0.9009	0.0163		30.8795	9.02705	0.330629
180847	59.024	0.9018	0.0164		30.9204	9.03607	0.332657
181047	59.12	0.903	0.0164		30.9707	9.0481	0.332657
181248	59.208	0.904	0.0165		31.0168	9.05812	0.334686
181448	59.294	0.9051	0.0165		31.0618	9.06914	0.334686
181648	59.374	0.9062	0.0166		31.1037	9.08016	0.336714
181849	59.458	0.9071	0.0166		31.1477	9.08918	0.336714
182049	59.534	0.9082	0.0167		31.1876	9.1002	0.338742
182250	59.616	0.9092	0.0167		31.2305	9.11022	0.338742
182450	59.69	0.9102	0.0169		31.2693	9.12024	0.342799
182650	59.77	0.9112	0.0168		31.3112	9.13026	0.340771
182851	59.84	0.9122	0.0169		31.3479	9.14028	0.342799
183051	59.916	0.9131	0.0169		31.3877	9.1493	0.342799
183253	59.988	0.914	0.0168		31.4254	9.15832	0.340771
183454	60.064	0.915	0.017		31.4652	9.16834	0.344828
183654	60.136	0.9161	0.0171		31.5029	9.17936	0.346856
183854	60.214	0.9171	0.0171		31.5438	9.18938	0.346856
184055	60.288	0.9179	0.0172		31.5825	9.19739	0.348884
184255	60.368	0.919	0.0173		31.6245	9.20842	0.350913
184456	60.45	0.9201	0.0172		31.6674	9.21944	0.348884
184656	60.526	0.9211	0.0174		31.7072	9.22946	0.352941
184856	60.604	0.9221	0.0175		31.7481	9.23948	0.35497
185057	60.686	0.9231	0.0175		31.791	9.2495	0.35497
185257	60.77	0.9241	0.0175		31.835	9.25952	0.35497
185458	60.85	0.9251	0.0175		31.877	9.26954	0.35497
185658	60.928	0.9261	0.0176		31.9178	9.27956	0.356998
185858	61.004	0.9271	0.0176		31.9576	9.28958	0.356998
186059	61.08	0.9282	0.0176		31.9974	9.3006	0.356998
186259	61.16	0.9292	0.0179		32.0394	9.31062	0.363083
186461	61.238	0.9302	0.0179		32.0802	9.32064	0.363083
186662	61.314	0.9311	0.018		32.12	9.32966	0.365112
186862	61.388	0.9321	0.0181		32.1588	9.33968	0.36714
187063	61.462	0.9331	0.018		32.1976	9.3497	0.365112
187263	61.532	0.9341	0.0182		32.2342	9.35972	0.369168
187463	61.604	0.9352	0.018		32.2719	9.37074	0.365112
187664	61.67	0.936	0.018		32.3065	9.37876	0.365112
187864	61.742	0.937	0.0181		32.3442	9.38878	0.36714
188064	61.814	0.938	0.0182		32.382	9.3988	0.369168
188265	61.892	0.9389	0.0182		32.4228	9.40782	0.369168
188465	61.976	0.9399	0.0183		32.4668	9.41784	0.371197
188666	62.056	0.9411	0.0183		32.5087	9.42986	0.371197
188866	62.136	0.9421	0.0183		32.5506	9.43988	0.371197
189066	62.218	0.9431	0.0183		32.5936	9.4499	0.371197
189267	62.292	0.9441	0.0184		32.6324	9.45992	0.373225
189467	62.366	0.9451	0.0186		32.6711	9.46994	0.377282
189669	62.438	0.9461	0.0187		32.7088	9.47996	0.37931
189870	62.51	0.9471	0.0186		32.7466	9.48998	0.377282
190070	62.584	0.9479	0.0188		32.7853	9.498	0.381339
190271	62.654	0.949	0.0189		32.822	9.50902	0.383367
190471	62.73	0.9499	0.019		32.8618	9.51804	0.385396
190671	62.814	0.951	0.0188		32.9058	9.52906	0.381339
190872	62.894	0.952	0.019		32.9477	9.53908	0.385396
191072	62.98	0.9532	0.0191		32.9928	9.5511	0.387424
191272	63.06	0.9542	0.019		33.0347	9.56112	0.385396
191473	63.138	0.9552	0.019		33.0756	9.57114	0.385396
191673	63.218	0.9561	0.0191		33.1175	9.58016	0.387424
191874	63.3	0.9572	0.0191		33.1604	9.59118	0.387424
192074	63.37	0.9582	0.0193		33.1971	9.6012	0.391481
192274	63.444	0.9592	0.0194		33.2359	9.61122	0.393509
192475	63.514	0.9602	0.0193		33.2725	9.62124	0.391481
192675	63.584	0.9612	0.0194		33.3092	9.63126	0.393509
192877	63.656	0.9622	0.0195		33.3469	9.64128	0.395538
193078	63.724	0.9632	0.0194		33.3825	9.6513	0.393509
193278	63.796	0.964	0.0194		33.4203	9.65932	0.393509
193479	63.868	0.965	0.0194		33.458	9.66934	0.393509
193679	63.942	0.9659	0.0196		33.4967	9.67836	0.397566
193879	64.014	0.967	0.0196		33.5345	9.68938	0.397566
194080	64.088	0.968	0.0196		33.5732	9.6994	0.397566
194280	64.17	0.9691	0.0196		33.6162	9.71042	0.397566
194480	64.254	0.97	0.0197		33.6602	9.71944	0.399594
194681	64.332	0.9711	0.0198		33.701	9.73046	0.401623
194881	64.412	0.9722	0.0199		33.743	9.74148	0.403651
195082	64.488	0.9732	0.0199		33.7828	9.7515	0.403651
195282	64.564	0.9742	0.02		33.8226	9.76152	0.40568
195482	64.636	0.9753	0.02		33.8603	9.77255	0.40568
195683	64.712	0.9762	0.0201		33.9001	9.78156	0.407708
195883	64.782	0.9771	0.0201		33.9368	9.79058	0.407708
196085	64.852	0.9782	0.0202		33.9735	9.8016	0.409736
196286	64.92	0.9792	0.0203		34.0091	9.81162	0.411765
196486	64.992	0.9802	0.0203		34.0468	9.82164	0.411765
196687	65.064	0.9811	0.0203		34.0845	9.83066	0.411765
196887	65.13	0.982	0.0205		34.1191	9.83968	0.415822
197087	65.202	0.9831	0.0205		34.1568	9.8507	0.415822
197288	65.272	0.984	0.0206		34.1935	9.85972	0.41785
197488	65.348	0.985	0.0205		34.2333	9.86974	0.415822
197688	65.426	0.986	0.0207		34.2741	9.87976	0.419878
197889	65.504	0.9871	0.0206		34.315	9.89078	0.41785
198089	65.572	0.988	0.0208		34.3506	9.8998	0.421907
198290	65.648	0.989	0.0208		34.3904	9.90982	0.421907
198490	65.726	0.99	0.0209		34.4313	9.91984	0.423935
198690	65.806	0.9911	0.021		34.4732	9.93086	0.425963
198891	65.886	0.9921	0.021		34.5151	9.94088	0.425963
199091	65.964	0.9932	0.0212		34.556	9.9519	0.43002
199293	66.038	0.9942	0.0213		34.5947	9.96192	0.432049
199494	66.11	0.9953	0.0213		34.6325	9.97295	0.432049
199694	66.182	0.9963	0.0213		34.6702	9.98297	0.432049
199895	66.25	0.9972	0.0213		34.7058	9.99198	0.432049
200095	66.324	0.9983	0.0213		34.7446	10.003	0.432049
200295	66.39	0.9992	0.0214		34.7791	10.012	0.434077
200496	66.46	1.0001	0.0215		34.8158	10.021	0.436105
200696	66.528	1.0011	0.0215		34.8514	10.0311	0.436105
200896	66.598	1.0021	0.0216		34.8881	10.0411	0.438134
201097	66.668	1.0031	0.0216		34.9248	10.0511	0.438134
201297	66.736	1.0041	0.0217		34.9604	10.0611	0.440162
201498	66.794	1.005	0.0218		34.9908	10.0701	0.442191
201698	66.86	1.006	0.0218		35.0254	10.0802	0.442191
201898	66.93	1.0069	0.0219		35.062	10.0892	0.444219
202099	67.038	1.0082	0.022		35.1186	10.1022	0.446247
202299	67.136	1.0094	0.022		35.1699	10.1142	0.446247
202500	67.228	1.0105	0.022		35.2181	10.1253	0.446247
202700	67.312	1.0116	0.0221		35.2621	10.1363	0.448276
202900	67.388	1.0126	0.0223		35.302	10.1463	0.452333
203101	67.458	1.0138	0.0222		35.3386	10.1583	0.450304
203301	67.53	1.0146	0.0222		35.3764	10.1663	0.450304
203503	67.602	1.0156	0.0223		35.4141	10.1764	0.452333
203704	67.668	1.0167	0.0224		35.4486	10.1874	0.454361
203904	67.738	1.0177	0.0225		35.4853	10.1974	0.456389
204104	67.802	1.0186	0.0225		35.5188	10.2064	0.456389
204305	67.87	1.0196	0.0226		35.5545	10.2164	0.458418
204505	67.938	1.0207	0.0227		35.5901	10.2275	0.460446
204706	67.996	1.0215	0.0228		35.6205	10.2355	0.462475
204906	68.062	1.0225	0.0228		35.655	10.2455	0.462475
205106	68.13	1.0234	0.0228		35.6907	10.2545	0.462475
205307	68.198	1.0245	0.023		35.7263	10.2655	0.466531
205507	68.264	1.0253	0.023		35.7609	10.2735	0.466531
205708	68.332	1.0263	0.023		35.7965	10.2836	0.466531
205908	68.396	1.0273	0.0231		35.83	10.2936	0.46856
206108	68.462	1.0283	0.0231		35.8646	10.3036	0.46856
206309	68.528	1.0293	0.0232		35.8992	10.3136	0.470588
206509	68.596	1.0303	0.0233		35.9348	10.3236	0.472617
206711	68.666	1.0312	0.0234		35.9715	10.3327	0.474645
206912	68.738	1.0323	0.0234		36.0092	10.3437	0.474645
207112	68.802	1.0332	0.0235		36.0427	10.3527	0.476673
207313	68.87	1.0342	0.0236		36.0783	10.3627	0.478702
207513	68.938	1.0351	0.0236		36.1139	10.3717	0.478702
207713	69.004	1.0361	0.0236		36.1485	10.3818	0.478702
207914	69.072	1.0371	0.0237		36.1841	10.3918	0.48073
208114	69.142	1.0382	0.0238		36.2208	10.4028	0.482759
208314	69.22	1.0392	0.0239		36.2617	10.4128	0.484787
208515	69.286	1.0402	0.0239		36.2963	10.4228	0.484787
208715	69.36	1.0412	0.0242		36.335	10.4329	0.490872
208916	69.432	1.0421	0.0243		36.3727	10.4419	0.492901
209116	69.502	1.0431	0.0243		36.4094	10.4519	0.492901
209316	69.57	1.044	0.0242		36.445	10.4609	0.490872
209517	69.636	1.0451	0.0244		36.4796	10.4719	0.494929
209717	69.704	1.046	0.0244		36.5152	10.481	0.494929
209919	69.774	1.0471	0.0245		36.5519	10.492	0.496957
210120	69.836	1.048	0.0244		36.5844	10.501	0.494929
210320	69.9	1.0491	0.0247		36.6179	10.512	0.501014
210521	69.964	1.05	0.0248		36.6514	10.521	0.503043
210721	70.038	1.051	0.0247		36.6902	10.5311	0.501014
210921	70.154	1.0522	0.0247		36.751	10.5431	0.501014
211122	70.266	1.0535	0.0242		36.8096	10.5561	0.490872
211322	70.362	1.0547	0.0243		36.8599	10.5681	0.492901
211522	70.446	1.0559	0.0244		36.9039	10.5802	0.494929
211723	70.514	1.0571	0.0244		36.9396	10.5922	0.494929
211923	70.58	1.058	0.0245		36.9741	10.6012	0.496957
212124	70.64	1.0589	0.0245		37.0056	10.6102	0.496957
212324	70.71	1.0599	0.0253		37.0422	10.6202	0.513185
212524	70.766	1.0608	0.0253		37.0716	10.6293	0.513185
212725	70.83	1.0618	0.0253		37.1051	10.6393	0.513185
212925	70.892	1.0628	0.0254		37.1376	10.6493	0.515213
213127	70.956	1.0638	0.0255		37.1711	10.6593	0.517241
213328	71.018	1.0647	0.0256		37.2036	10.6683	0.51927
213528	71.082	1.0657	0.0256		37.2371	10.6784	0.51927
213729	71.142	1.0666	0.0257		37.2685	10.6874	0.521298
213929	71.208	1.0676	0.0257		37.3031	10.6974	0.521298
214129	71.272	1.0685	0.0258		37.3366	10.7064	0.523327
214330	71.336	1.0696	0.0259		37.3702	10.7174	0.525355
214530	71.398	1.0706	0.0259		37.4026	10.7275	0.525355
214730	71.458	1.0715	0.0259		37.4341	10.7365	0.525355
214931	71.522	1.0725	0.0261		37.4676	10.7465	0.529412
215131	71.582	1.0735	0.0261		37.499	10.7565	0.529412
215332	71.648	1.0744	0.0261		37.5336	10.7655	0.529412
215532	71.712	1.0755	0.0263		37.5671	10.7766	0.533469
215732	71.772	1.0763	0.0264		37.5986	10.7846	0.535497
215933	71.836	1.0773	0.0264		37.6321	10.7946	0.535497
216133	71.898	1.0783	0.0266		37.6646	10.8046	0.539554
216335	71.972	1.0793	0.0267		37.7033	10.8146	0.541582
216536	72.044	1.0802	0.0268		37.7411	10.8236	0.543611
216736	72.11	1.0813	0.0269		37.7756	10.8347	0.545639
216937	72.174	1.0823	0.0268		37.8092	10.8447	0.543611
217137	72.248	1.0833	0.027		37.8479	10.8547	0.547667
217337	72.31	1.0843	0.0268		37.8804	10.8647	0.543611
217538	72.376	1.0853	0.0269		37.915	10.8747	0.545639
217738	72.436	1.0862	0.027		37.9464	10.8838	0.547667
217938	72.5	1.0872	0.0271		37.9799	10.8938	0.549696
218139	72.56	1.0882	0.0271		38.0114	10.9038	0.549696
218339	72.628	1.0893	0.0272		38.047	10.9148	0.551724
218540	72.696	1.0902	0.0273		38.0826	10.9238	0.553753
218740	72.758	1.0912	0.0274		38.1151	10.9339	0.555781
218940	72.822	1.0922	0.0275		38.1486	10.9439	0.557809
219141	72.882	1.0931	0.0276		38.1801	10.9529	0.559838
219341	72.948	1.0942	0.0277		38.2146	10.9639	0.561866
219543	73.016	1.0953	0.0277		38.2503	10.9749	0.561866
219744	73.078	1.0962	0.0277		38.2827	10.984	0.561866
219944	73.138	1.0971	0.0278		38.3142	10.993	0.563895
220145	73.204	1.0982	0.0279		38.3487	11.004	0.565923
220345	73.266	1.0991	0.028		38.3812	11.013	0.567951
220545	73.33	1.1	0.0281		38.4147	11.022	0.56998
220746	73.394	1.1011	0.0281		38.4483	11.0331	0.56998
220946	73.46	1.102	0.0282		38.4828	11.0421	0.572008
221146	73.528	1.1031	0.0282		38.5185	11.0531	0.572008
221347	73.598	1.1042	0.0284		38.5551	11.0641	0.576065
221547	73.668	1.1052	0.0284		38.5918	11.0741	0.576065
221748	73.74	1.1062	0.0285		38.6295	11.0842	0.578093
221948	73.806	1.1071	0.0286		38.6641	11.0932	0.580122
222148	73.876	1.1082	0.0288		38.7008	11.1042	0.584178
222349	73.948	1.1093	0.0288		38.7385	11.1152	0.584178
222549	74.016	1.1104	0.0288		38.7741	11.1263	0.584178
222750	74.084	1.1113	0.029		38.8097	11.1353	0.588235
222950	74.148	1.1124	0.029		38.8433	11.1463	0.588235
223150	74.21	1.1134	0.0291		38.8757	11.1563	0.590264
223351	74.276	1.1144	0.0293		38.9103	11.1663	0.59432
223551	74.338	1.1153	0.0295		38.9428	11.1754	0.598377
223753	74.404	1.1162	0.0295		38.9774	11.1844	0.598377
223954	74.472	1.1173	0.0294		39.013	11.1954	0.596349
224154	74.542	1.1183	0.0295		39.0497	11.2054	0.598377
224354	74.606	1.1194	0.0295		39.0832	11.2164	0.598377
224555	74.67	1.1204	0.0295		39.1167	11.2265	0.598377
224755	74.736	1.1215	0.0297		39.1513	11.2375	0.602434
224956	74.792	1.1224	0.0298		39.1806	11.2465	0.604462
225156	74.854	1.1233	0.0297		39.2131	11.2555	0.602434
225356	74.912	1.1243	0.0298		39.2435	11.2655	0.604462
225557	74.968	1.1253	0.03		39.2728	11.2756	0.608519
225757	75.026	1.1262	0.0302		39.3032	11.2846	0.612576
225958	75.088	1.1273	0.0302		39.3357	11.2956	0.612576
226158	75.15	1.1282	0.0303		39.3682	11.3046	0.614604
226358	75.21	1.1292	0.0303		39.3996	11.3146	0.614604
226559	75.268	1.1302	0.0304		39.43	11.3246	0.616633
226759	75.33	1.1312	0.0304		39.4625	11.3347	0.616633
226961	75.39	1.1323	0.0305		39.4939	11.3457	0.618661
227162	75.454	1.1332	0.0305		39.5274	11.3547	0.618661
227362	75.514	1.1342	0.0306		39.5589	11.3647	0.62069
227563	75.572	1.1354	0.0308		39.5892	11.3768	0.624746
227763	75.632	1.1363	0.0309		39.6207	11.3858	0.626775
227963	75.69	1.1372	0.0308		39.6511	11.3948	0.624746
228164	75.758	1.1383	0.0311		39.6867	11.4058	0.630832
228364	75.822	1.1392	0.031		39.7202	11.4148	0.628803
228564	75.888	1.1403	0.0312		39.7548	11.4259	0.63286
228765	75.95	1.1413	0.0313		39.7873	11.4359	0.634888
228965	76.014	1.1423	0.0314		39.8208	11.4459	0.636917
229166	76.078	1.1433	0.0314		39.8543	11.4559	0.636917
229366	76.14	1.1444	0.0316		39.8868	11.4669	0.640974
229566	76.204	1.1454	0.0317		39.9203	11.477	0.643002
229767	76.26	1.1463	0.0317		39.9497	11.486	0.643002
229923	75.246	1.1513	0.0537		39.4185	11.5361	1.08925
229944	74.232	1.1511	0.0538		38.8873	11.5341	1.09128
229973	73.22	1.148	0.0559		38.3571	11.503	1.13387
230022	71.064	1.1479	0.0593		37.2277	11.502	1.20284
230024	69.622	1.1492	0.0636		36.4723	11.515	1.29006
230026	68.518	1.1515	0.0768		35.8939	11.5381	1.55781
230030	66.994	1.1575	0.1321		35.0956	11.5982	2.67951
230036	65.642	1.1575	0.1321		34.3873	11.5982	2.67951
230043	64.544	1.1575	0.1321		33.8121	11.5982	2.67951
230049	63.166	1.1575	0.1321		33.0902	11.5982	2.67951
230053	62.156	1.1575	0.1321		32.5611	11.5982	2.67951
230057	61.138	1.1575	0.1321		32.0278	11.5982	2.67951
230063	59.776	1.1623	-0.5621		31.3143	11.6463	-11.4016
230070	58.562	1.1623	-0.5621		30.6784	11.6463	-11.4016
230259	57.562	1.1623	-0.5621		30.1545	11.6463	-11.4016
230461	57.35	1.1623	-0.5621		30.0434	11.6463	-11.4016
230662	56.546	1.1547	-0.5624		29.6223	11.5701	-11.4077
230690	55.518	1.1566	-0.5623		29.0837	11.5892	-11.4057
230891	55.288	1.1523	-0.5623		28.9632	11.5461	-11.4057
231091	55.18	1.1535	-0.5621		28.9067	11.5581	-11.4016
231293	55.128	1.1545	-0.5622		28.8794	11.5681	-11.4037
231494	55.182	1.1558	-0.5623		28.9077	11.5812	-11.4057
231694	55.188	1.1568	-0.5622		28.9109	11.5912	-11.4037
231895	55.174	1.1574	-0.5622		28.9035	11.5972	-11.4037
232095	55.302	1.159	-0.5622		28.9706	11.6132	-11.4037
232295	55.294	1.1598	-0.5621		28.9664	11.6212	-11.4016
232496	55.284	1.1604	-0.5619		28.9611	11.6273	-11.3976
232696	55.374	1.1616	-0.5622		29.0083	11.6393	-11.4037
232896	55.464	1.1629	-0.562		29.0554	11.6523	-11.3996
233097	55.522	1.1639	-0.5622		29.0858	11.6623	-11.4037
233297	55.556	1.1647	-0.5622		29.1036	11.6703	-11.4037
233498	55.534	1.1655	-0.5622		29.0921	11.6784	-11.4037
233698	55.578	1.1665	-0.5622		29.1152	11.6884	-11.4037
233898	55.674	1.1677	-0.5621		29.1655	11.7004	-11.4016
234099	55.766	1.169	-0.562		29.2136	11.7134	-11.3996
234299	55.806	1.1699	-0.562		29.2346	11.7224	-11.3996
234500	55.856	1.1708	-0.562		29.2608	11.7315	-11.3996
234700	55.906	1.1716	-0.5619		29.287	11.7395	-11.3976
234900	55.962	1.1727	-0.562		29.3163	11.7505	-11.3996
235101	56.02	1.1736	-0.5622		29.3467	11.7595	-11.4037
235301	56.084	1.1745	-0.5622		29.3802	11.7685	-11.4037
235503	56.148	1.1756	-0.5621		29.4138	11.7796	-11.4016
235704	56.218	1.1766	-0.5621		29.4504	11.7896	-11.4016
235904	56.29	1.1775	-0.5621		29.4882	11.7986	-11.4016
236104	56.358	1.1784	-0.5614		29.5238	11.8076	-11.3874
236305	56.43	1.1795	-0.5618		29.5615	11.8186	-11.3955
236505	56.506	1.1804	-0.5618		29.6013	11.8277	-11.3955
236706	56.582	1.1817	-0.5621		29.6411	11.8407	-11.4016
236906	56.658	1.1826	-0.5621		29.6809	11.8497	-11.4016
237106	56.73	1.1837	-0.5622		29.7186	11.8607	-11.4037
237307	56.794	1.1848	-0.5621		29.7522	11.8717	-11.4016
237507	56.858	1.1857	-0.5622		29.7857	11.8808	-11.4037
237708	56.924	1.1866	-0.5621		29.8203	11.8898	-11.4016
237908	56.994	1.1875	-0.5621		29.8569	11.8988	-11.4016
238108	57.066	1.1886	-0.5621		29.8947	11.9098	-11.4016
238309	57.136	1.1896	-0.5622		29.9313	11.9198	-11.4037
238509	57.212	1.1906	-0.5622		29.9712	11.9299	-11.4037
238711	57.28	1.1918	-0.5621		30.0068	11.9419	-11.4016
238912	57.344	1.1927	-0.5622		30.0403	11.9509	-11.4037
239112	57.404	1.1937	-0.5621		30.0717	11.9609	-11.4016
239313	57.464	1.1948	-0.5621		30.1032	11.9719	-11.4016
239513	57.518	1.1956	-0.5621		30.1315	11.98	-11.4016
239713	57.572	1.1967	-0.5621		30.1597	11.991	-11.4016
239914	57.59	1.1976	-0.562		30.1692	12	-11.3996
240021	56.59	1.1995	-0.5621		29.6453	12.019	-11.4016
240066	55.586	1.2004	-0.562		29.1194	12.0281	-11.3996
240087	54.53	1.2026	-0.5615		28.5662	12.0501	-11.3895
240103	53.466	1.2045	-0.5612		28.0088	12.0691	-11.3834
240116	52.272	1.2046	-0.5607		27.3833	12.0701	-11.3732
240122	50.832	1.2049	-0.5607		26.6289	12.0731	-11.3732
240127	49.586	1.2067	-0.5603		25.9762	12.0912	-11.3651
240133	48.438	1.2118	-0.559		25.3748	12.1423	-11.3387
240139	47.22	1.2174	-0.5574		24.7367	12.1984	-11.3063
240146	45.932	1.2209	-0.5549		24.062	12.2335	-11.2556
240154	44.652	1.2184	-0.5536		23.3915	12.2084	-11.2292
240162	43.498	1.2104	-0.5536		22.7869	12.1283	-11.2292
240362	43.454	1.2015	-0.5529		22.7639	12.0391	-11.215
240563	43.4	1.2008	-0.5533		22.7356	12.0321	-11.2231
240763	43.42	1.2022	-0.5533		22.7461	12.0461	-11.2231
240963	43.488	1.2035	-0.5532		22.7817	12.0591	-11.2211
241164	43.402	1.2037	-0.5531		22.7366	12.0611	-11.2191
241364	43.56	1.2056	-0.553		22.8194	12.0802	-11.217
241564	43.496	1.2057	-0.553		22.7859	12.0812	-11.217
241765	43.644	1.2075	-0.5528		22.8634	12.0992	-11.213
241965	43.614	1.2079	-0.5527		22.8477	12.1032	-11.211
242166	43.67	1.2089	-0.5526		22.877	12.1132	-11.2089
242366	43.756	1.2099	-0.5524		22.9221	12.1232	-11.2049
242566	43.836	1.2111	-0.5522		22.964	12.1353	-11.2008
242767	43.898	1.2121	-0.5519		22.9965	12.1453	-11.1947
242967	43.956	1.2132	-0.5518		23.0268	12.1563	-11.1927
243169	44.016	1.2142	-0.5516		23.0583	12.1663	-11.1886
243370	44.068	1.2151	-0.5514		23.0855	12.1754	-11.1846
243570	44.124	1.2161	-0.5512		23.1149	12.1854	-11.1805
243771	44.178	1.2171	-0.5489		23.1431	12.1954	-11.1339
243971	44.234	1.2182	-0.5509		23.1725	12.2064	-11.1744
244171	44.284	1.2191	-0.5493		23.1987	12.2154	-11.142
244372	44.336	1.22	-0.5479		23.2259	12.2244	-11.1136
244572	44.364	1.2214	-0.5478		23.2406	12.2385	-11.1116
244772	44.398	1.2222	-0.5499		23.2584	12.2465	-11.1542
244973	44.436	1.223	-0.5498		23.2783	12.2545	-11.1521
245173	44.478	1.224	-0.5497		23.3003	12.2645	-11.1501
245374	44.52	1.225	-0.5487		23.3223	12.2745	-11.1298
245574	44.546	1.2259	-0.5477		23.3359	12.2836	-11.1095
245774	44.346	1.2282	-0.5465		23.2312	12.3066	-11.0852
245975	43.996	1.2277	-0.5475		23.0478	12.3016	-11.1055
246175	43.786	1.2289	-0.547		22.9378	12.3136	-11.0953
246377	43.896	1.2306	-0.5481		22.9954	12.3307	-11.1176
246578	43.792	1.2306	-0.5455		22.9409	12.3307	-11.0649
246778	43.354	1.2332	-0.546		22.7115	12.3567	-11.0751
246979	43.314	1.2329	-0.5463		22.6905	12.3537	-11.0811
247179	43.498	1.2347	-0.5445		22.7869	12.3717	-11.0446
247379	43.464	1.2349	-0.5454		22.7691	12.3737	-11.0629
247580	43.57	1.2364	-0.5471		22.8246	12.3888	-11.0974
247780	43.568	1.2369	-0.5469		22.8236	12.3938	-11.0933
247980	43.696	1.2385	-0.5467		22.8906	12.4098	-11.0892
248181	43.662	1.2389	-0.5466		22.8728	12.4138	-11.0872
248381	43.744	1.2401	-0.5464		22.9158	12.4259	-11.0832
248582	43.828	1.2411	-0.5461		22.9598	12.4359	-11.0771
248782	43.896	1.2422	-0.5457		22.9954	12.4469	-11.069
248982	43.958	1.2433	-0.546		23.0279	12.4579	-11.0751
249183	43.992	1.2444	-0.5458		23.0457	12.4689	-11.071
249383	44.014	1.2452	-0.5457		23.0572	12.477	-11.069
249585	44.048	1.246	-0.5456		23.075	12.485	-11.0669
249786	44.094	1.2469	-0.5453		23.0991	12.494	-11.0609
249986	44.152	1.2479	-0.5441		23.1295	12.504	-11.0365
250187	44.222	1.2489	-0.545		23.1662	12.514	-11.0548
250387	44.29	1.2499	-0.5444		23.2018	12.524	-11.0426
250587	44.352	1.251	-0.5424		23.2343	12.5351	-11.002
250788	44.414	1.2521	-0.5441		23.2668	12.5461	-11.0365
250988	44.47	1.2531	-0.5443		23.2961	12.5561	-11.0406
251188	44.526	1.2542	-0.5442		23.3254	12.5671	-11.0385
251389	44.576	1.2551	-0.5439		23.3516	12.5762	-11.0325
251589	44.62	1.2562	-0.5416		23.3747	12.5872	-10.9858
251790	44.666	1.2571	-0.5428		23.3988	12.5962	-11.0101
251990	44.706	1.2582	-0.5406		23.4197	12.6072	-10.9655
252190	44.744	1.2592	-0.5403		23.4396	12.6172	-10.9594
252391	44.776	1.2602	-0.5418		23.4564	12.6273	-10.9899
252591	44.8	1.2613	-0.5408		23.469	12.6383	-10.9696
252793	44.816	1.2623	-0.5414		23.4774	12.6483	-10.9817
252994	44.806	1.2635	-0.5402		23.4721	12.6603	-10.9574
253194	44.75	1.2647	-0.5418		23.4428	12.6723	-10.9899
253395	44.396	1.2658	-0.5396		23.2573	12.6834	-10.9452
253595	43.834	1.2655	-0.5392		22.9629	12.6804	-10.9371
253795	44.016	1.2676	-0.5402		23.0583	12.7014	-10.9574
253996	43.758	1.2679	-0.5403		22.9231	12.7044	-10.9594
254055	42.738	1.2718	-0.5404		22.3888	12.7435	-10.9615
254091	41.688	1.2701	-0.5405		21.8387	12.7265	-10.9635
254135	40.666	1.2709	-0.5403		21.3033	12.7345	-10.9594
254179	39.09	1.2688	-0.5402		20.4777	12.7134	-10.9574
254181	37.324	1.2697	-0.5402		19.5526	12.7224	-10.9574
254183	31.046	1.2724	-0.5401		16.2638	12.7495	-10.9554
254185	20.832	1.2816	-0.5393		10.9131	12.8417	-10.9391
254187	14.55	1.2816	-0.5393		7.62218	12.8417	-10.9391
254188	13.314	1.2816	-0.5393		6.97469	12.8417	-10.9391
254198	11.684	1.2816	-0.5393		6.12079	12.8417	-10.9391
254202	9.852	1.2816	-0.5393		5.16108	12.8417	-10.9391
254206	8.586	1.2816	-0.5393		4.49787	12.8417	-10.9391
254211	6.692	1.2816	-0.5393		3.50568	12.8417	-10.9391
254215	5.332	1.2816	-0.5393		2.79323	12.8417	-10.9391
254219	4.116	1.2816	-0.5393		2.15621	12.8417	-10.9391
254223	3.052	1.2816	-0.5393		1.59882	12.8417	-10.9391
254229	1.746	1.2816	-0.5393		0.914662	12.8417	-10.9391
254236	0.652	1.2816	-0.5393		0.341558	12.8417	-10.9391
254437	0.766	1.2816	-0.5393		0.401278	12.8417	-10.9391
254637	0.852	1.2816	-0.5393		0.44633	12.8417	-10.9391
254837	0.92	1.2719	-0.5213		0.481952	12.7445	-10.574
255038	0.97	1.2727	-0.5211		0.508145	12.7525	-10.57
255238	1.016	1.2739	-0.5214		0.532243	12.7645	-10.5761
255438	1.06	1.2747	-0.5214		0.555293	12.7725	-10.5761
255639	1.102	1.2759	-0.5214		0.577295	12.7846	-10.5761
255839	1.14	1.2766	-0.5214		0.597202	12.7916	-10.5761
256040	1.178	1.2777	-0.5213		0.617109	12.8026	-10.574
256240	1.22	1.2788	-0.5214		0.639111	12.8136	-10.5761
256440	1.262	1.2797	-0.5214		0.661113	12.8226	-10.5761
256641	1.3	1.281	-0.5214		0.68102	12.8357	-10.5761
256841	1.338	1.282	-0.5214		0.700926	12.8457	-10.5761
257043	1.372	1.2829	-0.5214		0.718738	12.8547	-10.5761
257244	1.404	1.284	-0.5214		0.735501	12.8657	-10.5761
257444	1.434	1.2849	-0.5214		0.751217	12.8747	-10.5761
257645	1.464	1.2858	-0.5214		0.766933	12.8838	-10.5761
257845	1.496	1.2866	-0.5209		0.783696	12.8918	-10.5659
258045	1.528	1.2875	-0.5209		0.80046	12.9008	-10.5659
258246	1.558	1.2884	-0.5214		0.816176	12.9098	-10.5761
258446	1.594	1.2895	-0.521		0.835035	12.9208	-10.568
258646	1.63	1.2905	-0.5213		0.853894	12.9309	-10.574
258847	1.664	1.2916	-0.5209		0.871705	12.9419	-10.5659
259047	1.698	1.2925	-0.5209		0.889516	12.9509	-10.5659
259248	1.734	1.2936	-0.521		0.908375	12.9619	-10.568
259448	1.77	1.2946	-0.521		0.927234	12.9719	-10.568
259648	1.802	1.2957	-0.521		0.943998	12.983	-10.568
259849	1.834	1.2966	-0.521		0.960762	12.992	-10.568
260049	1.872	1.2976	-0.521		0.980668	13.002	-10.568
260250	1.902	1.2985	-0.521		0.996384	13.011	-10.568
260450	1.936	1.2995	-0.521		1.0142	13.021	-10.568
260650	1.972	1.3006	-0.5209		1.03305	13.0321	-10.5659
260851	2.004	1.3015	-0.5209		1.04982	13.0411	-10.5659
261051	2.038	1.3026	-0.5209		1.06763	13.0521	-10.5659
261253	2.072	1.3035	-0.5209		1.08544	13.0611	-10.5659
261454	2.104	1.3044	-0.5209		1.1022	13.0701	-10.5659
261654	2.14	1.3055	-0.5209		1.12106	13.0812	-10.5659
261854	2.176	1.3065	-0.5208		1.13992	13.0912	-10.5639
262055	2.21	1.3075	-0.5208		1.15773	13.1012	-10.5639

## Sheet: A-3
Force (small)	--	journey	) Results Report
17:21:53,06/23/2019
Diameter: 49.1	mm	Height: 100.4	mm
Vertical force transducer (Test piece vertical force)
Control mode: displacement	Waveform: Slope
mm/s	Force the finish:1.2502	mm
Time (ms)	Vertical force (KN)	Vertical deformation (mm)	Transverse deformation (mm)		stress	Axial strain	transvrsal strain
0	0	0	0		0	0	0
219	0	0.0001	0		0	0.001001	0
419	0.01	0.0005	-0.0001		0.00525993	0.00500501	-0.00203252
620	0.042	0.002	-0.0002		0.0220917	0.02002	-0.00406504
821	0.03	0.0032	-0.0002		0.0157798	0.032032	-0.00406504
1021	0.044	0.0034	-0.0003		0.0231437	0.034034	-0.00609756
1221	0.062	0.0058	-0.0003		0.0326116	0.0580581	-0.00609756
1421	0.052	0.0056	-0.0003		0.0273516	0.0560561	-0.00609756
1622	0.078	0.0079	-0.0004		0.0410274	0.0790791	-0.00813008
1823	0.066	0.0078	-0.0004		0.0347155	0.0780781	-0.00813008
2023	0.09	0.0093	-0.0004		0.0473394	0.0930931	-0.00813008
2223	0.084	0.0101	-0.0004		0.0441834	0.101101	-0.00813008
2423	0.092	0.0106	-0.0004		0.0483914	0.106106	-0.00813008
2624	0.108	0.0128	-0.0005		0.0568072	0.128128	-0.0101626
2824	0.106	0.0132	-0.0004		0.0557553	0.132132	-0.00813008
3025	0.108	0.014	-0.0004		0.0568072	0.14014	-0.00813008
3225	0.114	0.0149	-0.0004		0.0599632	0.149149	-0.00813008
3425	0.12	0.0159	-0.0005		0.0631192	0.159159	-0.0101626
3627	0.124	0.0171	-0.0005		0.0652231	0.171171	-0.0101626
3828	0.132	0.0181	-0.0006		0.0694311	0.181181	-0.0121951
4029	0.136	0.0192	-0.0007		0.071535	0.192192	-0.0142276
4229	0.14	0.0204	-0.0007		0.073639	0.204204	-0.0142276
4429	0.144	0.0214	-0.0009		0.075743	0.214214	-0.0182927
4629	0.15	0.0226	-0.0009		0.0788989	0.226226	-0.0182927
4830	0.154	0.0236	-0.001		0.0810029	0.236236	-0.0203252
5031	0.158	0.0247	-0.0011		0.0831069	0.247247	-0.0223577
5231	0.162	0.0256	-0.0012		0.0852109	0.256256	-0.0243902
5431	0.166	0.0267	-0.0013		0.0873148	0.267267	-0.0264228
5631	0.17	0.0277	-0.0014		0.0894188	0.277277	-0.0284553
5832	0.174	0.0286	-0.0015		0.0915228	0.286286	-0.0304878
6032	0.178	0.0295	-0.0016		0.0936267	0.295295	-0.0325203
6233	0.18	0.0305	-0.0017		0.0946787	0.305305	-0.0345528
6433	0.186	0.0317	-0.0018		0.0978347	0.317317	-0.0365854
6633	0.19	0.0327	-0.0019		0.0999387	0.327327	-0.0386179
6835	0.192	0.0335	-0.0021		0.100991	0.335335	-0.0426829
7036	0.196	0.0346	-0.0022		0.103095	0.346346	-0.0447154
7237	0.204	0.0356	-0.0022		0.107303	0.356356	-0.0447154
7437	0.21	0.0366	-0.0024		0.110459	0.366366	-0.0487805
7637	0.214	0.0376	-0.0025		0.112562	0.376376	-0.050813
7837	0.216	0.0384	-0.0026		0.113614	0.384384	-0.0528455
8038	0.222	0.0394	-0.0027		0.11677	0.394394	-0.054878
8239	0.224	0.0403	-0.0028		0.117822	0.403403	-0.0569106
8439	0.23	0.0413	-0.0029		0.120978	0.413413	-0.0589431
8639	0.232	0.0423	-0.003		0.12203	0.423423	-0.0609756
8839	0.24	0.0433	-0.0031		0.126238	0.433433	-0.0630081
9040	0.244	0.0443	-0.0032		0.128342	0.443443	-0.0650407
9240	0.246	0.0455	-0.0033		0.129394	0.455455	-0.0670732
9441	0.252	0.0465	-0.0035		0.13255	0.465465	-0.0711382
9641	0.26	0.0475	-0.0037		0.136758	0.475475	-0.0752033
9841	0.262	0.0485	-0.0036		0.13781	0.485485	-0.0731707
10043	0.268	0.0496	-0.0038		0.140966	0.496496	-0.0772358
10244	0.272	0.0507	-0.0039		0.14307	0.507508	-0.0792683
10445	0.276	0.0518	-0.0041		0.145174	0.518519	-0.0833333
10645	0.282	0.0529	-0.0043		0.14833	0.52953	-0.0873984
10845	0.282	0.0538	-0.0045		0.14833	0.538539	-0.0914634
11045	0.29	0.0549	-0.0046		0.152538	0.54955	-0.0934959
11246	0.296	0.0557	-0.0046		0.155694	0.557558	-0.0934959
11447	0.298	0.0568	-0.0047		0.156746	0.568569	-0.0955285
11647	0.304	0.0577	-0.0048		0.159902	0.577578	-0.097561
11847	0.306	0.0586	-0.0051		0.160954	0.586587	-0.103659
12047	0.312	0.0596	-0.0048		0.16411	0.596597	-0.097561
12248	0.316	0.0605	-0.0051		0.166214	0.605606	-0.103659
12448	0.32	0.0615	-0.0053		0.168318	0.615616	-0.107724
12649	0.324	0.0624	-0.0056		0.170422	0.624625	-0.113821
12849	0.33	0.0635	-0.0055		0.173578	0.635636	-0.111789
13049	0.332	0.0645	-0.0056		0.17463	0.645646	-0.113821
13250	0.338	0.0654	-0.0058		0.177786	0.654655	-0.117886
13450	0.342	0.0665	-0.0058		0.17989	0.665666	-0.117886
13651	0.348	0.0674	-0.0061		0.183046	0.674675	-0.123984
13851	0.352	0.0686	-0.0063		0.18515	0.686687	-0.128049
14051	0.358	0.0696	-0.0064		0.188305	0.696697	-0.130081
14253	0.362	0.0706	-0.0066		0.190409	0.706707	-0.134146
14454	0.368	0.0717	-0.0068		0.193565	0.717718	-0.138211
14655	0.372	0.0726	-0.0068		0.195669	0.726727	-0.138211
14855	0.376	0.0737	-0.0071		0.197773	0.737738	-0.144309
15055	0.38	0.0747	-0.0072		0.199877	0.747748	-0.146341
15255	0.386	0.0756	-0.0073		0.203033	0.756757	-0.148374
15456	0.39	0.0766	-0.0075		0.205137	0.766767	-0.152439
15657	0.394	0.0775	-0.0078		0.207241	0.775776	-0.158537
15857	0.404	0.0785	-0.0081		0.212501	0.785786	-0.164634
16057	0.406	0.0797	-0.0083		0.213553	0.797798	-0.168699
16257	0.412	0.0806	-0.0084		0.216709	0.806807	-0.170732
16458	0.416	0.0817	-0.0085		0.218813	0.817818	-0.172764
16658	0.424	0.0827	-0.0086		0.223021	0.827828	-0.174797
16859	0.424	0.0837	-0.0088		0.223021	0.837838	-0.178862
17059	0.43	0.0847	-0.0087		0.226177	0.847848	-0.176829
17259	0.436	0.0857	-0.0091		0.229333	0.857858	-0.184959
17461	0.44	0.0867	-0.0094		0.231437	0.867868	-0.191057
17662	0.444	0.0877	-0.0095		0.233541	0.877878	-0.193089
17863	0.452	0.0887	-0.0096		0.237749	0.887888	-0.195122
18063	0.456	0.0897	-0.0099		0.239853	0.897898	-0.20122
18263	0.462	0.0907	-0.0099		0.243009	0.907908	-0.20122
18463	0.466	0.0916	-0.0104		0.245113	0.916917	-0.211382
18664	0.472	0.0928	-0.0105		0.248269	0.928929	-0.213415
18865	0.478	0.0937	-0.0106		0.251425	0.937938	-0.215447
19065	0.484	0.0946	-0.0105		0.254581	0.946947	-0.213415
19265	0.488	0.0955	-0.0108		0.256685	0.955956	-0.219512
19465	0.494	0.0966	-0.011		0.259841	0.966967	-0.223577
19666	0.5	0.0976	-0.0112		0.262996	0.976977	-0.227642
19866	0.504	0.0986	-0.0114		0.2651	0.986987	-0.231707
20067	0.512	0.0994	-0.0118		0.269308	0.994995	-0.239837
20267	0.516	0.1005	-0.0118		0.271412	1.00601	-0.239837
20467	0.52	0.1014	-0.0121		0.273516	1.01502	-0.245935
20669	0.53	0.1025	-0.0123		0.278776	1.02603	-0.25
20870	0.534	0.1035	-0.0125		0.28088	1.03604	-0.254065
21071	0.54	0.1045	-0.0124		0.284036	1.04605	-0.252033
21271	0.548	0.1054	-0.0127		0.288244	1.05506	-0.25813
21471	0.552	0.1066	-0.013		0.290348	1.06707	-0.264228
21671	0.558	0.1075	-0.0132		0.293504	1.07608	-0.268293
21872	0.564	0.1084	-0.0134		0.29666	1.08509	-0.272358
22073	0.57	0.1095	-0.0137		0.299816	1.0961	-0.278455
22273	0.576	0.1106	-0.014		0.302972	1.10711	-0.284553
22473	0.58	0.1114	-0.0143		0.305076	1.11512	-0.29065
22673	0.588	0.1125	-0.0144		0.309284	1.12613	-0.292683
22874	0.594	0.1136	-0.0147		0.31244	1.13714	-0.29878
23074	0.6	0.1146	-0.0148		0.315596	1.14715	-0.300813
23275	0.604	0.1155	-0.0149		0.3177	1.15616	-0.302846
23475	0.612	0.1165	-0.0148		0.321908	1.16617	-0.300813
23675	0.62	0.1175	-0.0149		0.326116	1.17618	-0.302846
23877	0.626	0.1184	-0.0152		0.329272	1.18519	-0.308943
24078	0.63	0.1194	-0.0156		0.331376	1.1952	-0.317073
24279	0.638	0.1205	-0.0157		0.335583	1.20621	-0.319106
24479	0.642	0.1215	-0.016		0.337687	1.21622	-0.325203
24679	0.65	0.1224	-0.0161		0.341895	1.22523	-0.327236
24879	0.656	0.1235	-0.0164		0.345051	1.23624	-0.333333
25080	0.662	0.1245	-0.0167		0.348207	1.24625	-0.339431
25281	0.668	0.1255	-0.0169		0.351363	1.25626	-0.343496
25481	0.672	0.1265	-0.0172		0.353467	1.26627	-0.349593
25681	0.682	0.1275	-0.0175		0.358727	1.27628	-0.355691
25881	0.686	0.1286	-0.0178		0.360831	1.28729	-0.361789
26082	0.694	0.1296	-0.0173		0.365039	1.2973	-0.351626
26282	0.7	0.1306	-0.0181		0.368195	1.30731	-0.367886
26483	0.708	0.1316	-0.0185		0.372403	1.31732	-0.376016
26683	0.714	0.1325	-0.0186		0.375559	1.32633	-0.378049
26883	0.722	0.1335	-0.0191		0.379767	1.33634	-0.388211
27085	0.73	0.1346	-0.0192		0.383975	1.34735	-0.390244
27286	0.734	0.1355	-0.0194		0.386079	1.35636	-0.394309
27487	0.742	0.1365	-0.0197		0.390287	1.36637	-0.400407
27687	0.748	0.1375	-0.0199		0.393443	1.37638	-0.404472
27887	0.754	0.1385	-0.0201		0.396599	1.38639	-0.408537
28087	0.762	0.1395	-0.0203		0.400807	1.3964	-0.412602
28288	0.766	0.1406	-0.0204		0.402911	1.40741	-0.414634
28489	0.774	0.1415	-0.0207		0.407119	1.41642	-0.420732
28689	0.782	0.1425	-0.021		0.411326	1.42643	-0.426829
28889	0.79	0.1435	-0.0212		0.415534	1.43644	-0.430894
29089	0.796	0.1445	-0.0214		0.41869	1.44645	-0.434959
29290	0.804	0.1455	-0.0217		0.422898	1.45646	-0.441057
29490	0.808	0.1465	-0.0216		0.425002	1.46647	-0.439024
29691	0.818	0.1474	-0.021		0.430262	1.47548	-0.426829
29891	0.824	0.1485	-0.0213		0.433418	1.48649	-0.432927
30091	0.83	0.1495	-0.0214		0.436574	1.4965	-0.434959
30293	0.84	0.1505	-0.0219		0.441834	1.50651	-0.445122
30494	0.846	0.1514	-0.0221		0.44499	1.51552	-0.449187
30695	0.854	0.1523	-0.0222		0.449198	1.52452	-0.45122
30895	0.86	0.1533	-0.0225		0.452354	1.53453	-0.457317
31095	0.868	0.1543	-0.0227		0.456562	1.54454	-0.461382
31295	0.88	0.1554	-0.0229		0.462874	1.55556	-0.465447
31496	0.884	0.1563	-0.0231		0.464978	1.56456	-0.469512
31697	0.894	0.1573	-0.0235		0.470238	1.57457	-0.477642
31897	0.902	0.1583	-0.0238		0.474446	1.58458	-0.48374
32097	0.908	0.1595	-0.0239		0.477602	1.5966	-0.485772
32297	0.916	0.1604	-0.0244		0.48181	1.60561	-0.495935
32498	0.926	0.1614	-0.0247		0.487069	1.61562	-0.502033
32698	0.93	0.1622	-0.0251		0.489173	1.62362	-0.510163
32899	0.942	0.1633	-0.0254		0.495485	1.63463	-0.51626
33099	0.95	0.1642	-0.0256		0.499693	1.64364	-0.520325
33299	0.962	0.1651	-0.0258		0.506005	1.65265	-0.52439
33500	0.972	0.1661	-0.0262		0.511265	1.66266	-0.53252
33700	0.978	0.1671	-0.0261		0.514421	1.67267	-0.530488
33901	0.988	0.168	-0.0262		0.519681	1.68168	-0.53252
34101	1.002	0.1691	-0.0266		0.527045	1.69269	-0.54065
34301	1.01	0.17	-0.0267		0.531253	1.7017	-0.542683
34503	1.02	0.1711	-0.027		0.536513	1.71271	-0.54878
34704	1.03	0.172	-0.0271		0.541773	1.72172	-0.550813
34905	1.04	0.1731	-0.0274		0.547033	1.73273	-0.556911
35105	1.05	0.174	-0.0277		0.552293	1.74174	-0.563008
35305	1.066	0.1751	-0.028		0.560708	1.75275	-0.569106
35505	1.076	0.1761	-0.0281		0.565968	1.76276	-0.571138
35706	1.09	0.1771	-0.0282		0.573332	1.77277	-0.573171
35907	1.1	0.1782	-0.0285		0.578592	1.78378	-0.579268
36107	1.112	0.1792	-0.0286		0.584904	1.79379	-0.581301
36307	1.124	0.1802	-0.029		0.591216	1.8038	-0.589431
36507	1.138	0.1812	-0.0293		0.59858	1.81381	-0.595528
36708	1.15	0.1822	-0.0292		0.604892	1.82382	-0.593496
36908	1.16	0.1831	-0.0286		0.610152	1.83283	-0.581301
37109	1.176	0.184	-0.0289		0.618568	1.84184	-0.587398
37309	1.188	0.185	-0.0291		0.62488	1.85185	-0.591463
37509	1.204	0.1859	-0.0297		0.633295	1.86086	-0.603659
37711	1.218	0.187	-0.0303		0.640659	1.87187	-0.615854
37912	1.232	0.1879	-0.0307		0.648023	1.88088	-0.623984
38113	1.244	0.189	-0.0311		0.654335	1.89189	-0.632114
38313	1.264	0.1899	-0.0312		0.664855	1.9009	-0.634146
38513	1.278	0.1909	-0.0314		0.672219	1.91091	-0.638211
38713	1.292	0.192	-0.0317		0.679583	1.92192	-0.644309
38914	1.31	0.193	-0.0321		0.689051	1.93193	-0.652439
39115	1.33	0.194	-0.0323		0.699571	1.94194	-0.656504
39315	1.342	0.1951	-0.0325		0.705883	1.95295	-0.660569
39515	1.36	0.1962	-0.0332		0.71535	1.96396	-0.674797
39715	1.376	0.1972	-0.0342		0.723766	1.97397	-0.695122
39916	1.394	0.1983	-0.0351		0.733234	1.98498	-0.713415
40116	1.408	0.1993	-0.0357		0.740598	1.99499	-0.72561
40317	1.426	0.2003	-0.0358		0.750066	2.00501	-0.727642
40517	1.44	0.2013	-0.036		0.75743	2.01502	-0.731707
40717	1.458	0.2023	-0.0361		0.766898	2.02503	-0.73374
40919	1.474	0.2034	-0.0363		0.775314	2.03604	-0.737805
41120	1.492	0.2042	-0.0366		0.784781	2.04404	-0.743902
41321	1.51	0.2053	-0.0369		0.794249	2.05506	-0.75
41521	1.528	0.2062	-0.0376		0.803717	2.06406	-0.764228
41721	1.546	0.2072	-0.0391		0.813185	2.07407	-0.794715
41921	1.566	0.2084	-0.0398		0.823705	2.08609	-0.808943
42122	1.58	0.2093	-0.04		0.831069	2.0951	-0.813008
42323	1.598	0.2103	-0.0392		0.840537	2.10511	-0.796748
42523	1.618	0.2113	-0.0405		0.851057	2.11512	-0.823171
42723	1.636	0.2122	-0.0413		0.860524	2.12412	-0.839431
42923	1.654	0.2132	-0.0417		0.869992	2.13413	-0.847561
43124	1.67	0.2141	-0.042		0.878408	2.14314	-0.853659
43324	1.688	0.2151	-0.0422		0.887876	2.15315	-0.857724
43525	1.708	0.2161	-0.0426		0.898396	2.16316	-0.865854
43725	1.724	0.2169	-0.0431		0.906812	2.17117	-0.876016
43925	1.744	0.2179	-0.0434		0.917332	2.18118	-0.882114
44127	1.764	0.2189	-0.0438		0.927852	2.19119	-0.890244
44328	1.788	0.2199	-0.0442		0.940475	2.2012	-0.898374
44529	1.808	0.2209	-0.0443		0.950995	2.21121	-0.900407
44729	1.826	0.222	-0.0447		0.960463	2.22222	-0.908537
44929	1.848	0.2229	-0.0452		0.972035	2.23123	-0.918699
45129	1.868	0.2239	-0.0455		0.982555	2.24124	-0.924797
45330	1.892	0.2248	-0.046		0.995179	2.25025	-0.934959
45531	1.916	0.2258	-0.0463		1.0078	2.26026	-0.941057
45731	1.936	0.227	-0.0465		1.01832	2.27227	-0.945122
45931	1.96	0.2281	-0.0467		1.03095	2.28328	-0.949187
46131	1.982	0.229	-0.0471		1.04252	2.29229	-0.957317
46332	2.004	0.2302	-0.0475		1.05409	2.3043	-0.965447
46532	2.03	0.2312	-0.0475		1.06777	2.31431	-0.965447
46733	2.052	0.2323	-0.0477		1.07934	2.32533	-0.969512
46933	2.074	0.2333	-0.0479		1.09091	2.33534	-0.973577
47133	2.1	0.2343	-0.048		1.10459	2.34535	-0.97561
47335	2.122	0.2353	-0.0482		1.11616	2.35536	-0.979675
47536	2.148	0.2363	-0.0482		1.12983	2.36537	-0.979675
47737	2.17	0.2373	-0.0483		1.1414	2.37538	-0.981707
47937	2.194	0.2384	-0.0484		1.15403	2.38639	-0.98374
48137	2.22	0.2396	-0.0486		1.1677	2.3984	-0.987805
48337	2.242	0.2405	-0.0486		1.17928	2.40741	-0.987805
48538	2.266	0.2415	-0.0487		1.1919	2.41742	-0.989837
48739	2.288	0.2425	-0.0489		1.20347	2.42743	-0.993902
48939	2.316	0.2435	-0.0489		1.2182	2.43744	-0.993902
49139	2.338	0.2445	-0.049		1.22977	2.44745	-0.995935
49339	2.364	0.2456	-0.0491		1.24345	2.45846	-0.997967
49540	2.388	0.2466	-0.0492		1.25607	2.46847	-1
49740	2.41	0.2476	-0.0493		1.26764	2.47848	-1.00203
49941	2.434	0.2487	-0.0495		1.28027	2.48949	-1.0061
50141	2.46	0.2495	-0.0495		1.29394	2.4975	-1.0061
50341	2.482	0.2506	-0.0496		1.30551	2.50851	-1.00813
50543	2.506	0.2516	-0.0496		1.31814	2.51852	-1.00813
50744	2.53	0.2526	-0.0497		1.33076	2.52853	-1.01016
50945	2.556	0.2536	-0.0497		1.34444	2.53854	-1.01016
51145	2.582	0.2546	-0.0498		1.35811	2.54855	-1.0122
51345	2.604	0.2556	-0.05		1.36969	2.55856	-1.01626
51545	2.628	0.2564	-0.0501		1.38231	2.56657	-1.01829
51746	2.654	0.2576	-0.05		1.39599	2.57858	-1.01626
51947	2.678	0.2587	-0.0502		1.40861	2.58959	-1.02033
52147	2.704	0.2596	-0.0503		1.42228	2.5986	-1.02236
52347	2.726	0.2607	-0.0503		1.43386	2.60961	-1.02236
52547	2.752	0.2618	-0.0503		1.44753	2.62062	-1.02236
52748	2.776	0.2628	-0.0504		1.46016	2.63063	-1.02439
52948	2.804	0.2637	-0.0505		1.47488	2.63964	-1.02642
53149	2.828	0.2648	-0.0504		1.48751	2.65065	-1.02439
53349	2.854	0.2657	-0.0505		1.50118	2.65966	-1.02642
53549	2.878	0.2666	-0.0504		1.51381	2.66867	-1.02439
53750	2.902	0.2678	-0.0507		1.52643	2.68068	-1.03049
53950	2.928	0.2688	-0.0507		1.54011	2.69069	-1.03049
54151	2.952	0.2697	-0.0507		1.55273	2.6997	-1.03049
54351	2.974	0.2707	-0.0508		1.5643	2.70971	-1.03252
54551	3	0.2718	-0.0508		1.57798	2.72072	-1.03252
54753	3.022	0.2727	-0.0509		1.58955	2.72973	-1.03455
54954	3.05	0.2737	-0.0509		1.60428	2.73974	-1.03455
55155	3.076	0.2748	-0.051		1.61795	2.75075	-1.03659
55355	3.1	0.2757	-0.051		1.63058	2.75976	-1.03659
55555	3.126	0.2766	-0.051		1.64425	2.76877	-1.03659
55755	3.15	0.2775	-0.051		1.65688	2.77778	-1.03659
55956	3.178	0.2787	-0.051		1.67161	2.78979	-1.03659
56157	3.206	0.2796	-0.0511		1.68633	2.7988	-1.03862
56357	3.234	0.2807	-0.0511		1.70106	2.80981	-1.03862
56557	3.258	0.2817	-0.051		1.71368	2.81982	-1.03659
56757	3.286	0.2825	-0.0511		1.72841	2.82783	-1.03862
56958	3.314	0.2835	-0.0511		1.74314	2.83784	-1.03862
57158	3.342	0.2845	-0.0511		1.75787	2.84785	-1.03862
57359	3.37	0.2856	-0.0511		1.7726	2.85886	-1.03862
57559	3.4	0.2867	-0.0511		1.78838	2.86987	-1.03862
57759	3.424	0.2875	-0.0511		1.801	2.87788	-1.03862
57961	3.454	0.2887	-0.0512		1.81678	2.88989	-1.04065
58162	3.482	0.2896	-0.0511		1.83151	2.8989	-1.03862
58363	3.512	0.2906	-0.0512		1.84729	2.90891	-1.04065
58563	3.538	0.2916	-0.0511		1.86096	2.91892	-1.03862
58763	3.57	0.2925	-0.0512		1.87779	2.92793	-1.04065
58963	3.6	0.2936	-0.0512		1.89357	2.93894	-1.04065
59164	3.626	0.2947	-0.0512		1.90725	2.94995	-1.04065
59365	3.656	0.2956	-0.0513		1.92303	2.95896	-1.04268
59565	3.68	0.2966	-0.0513		1.93565	2.96897	-1.04268
59765	3.714	0.2976	-0.0512		1.95354	2.97898	-1.04065
59965	3.742	0.2986	-0.0513		1.96827	2.98899	-1.04268
60166	3.77	0.2997	-0.0513		1.98299	3	-1.04268
60366	3.802	0.3005	-0.0512		1.99983	3.00801	-1.04065
60567	3.834	0.3016	-0.0512		2.01666	3.01902	-1.04065
60767	3.866	0.3025	-0.0513		2.03349	3.02803	-1.04268
60967	3.894	0.3036	-0.0513		2.04822	3.03904	-1.04268
61169	3.924	0.3046	-0.0513		2.064	3.04905	-1.04268
61370	3.954	0.3055	-0.0514		2.07978	3.05806	-1.04472
61571	3.984	0.3065	-0.0514		2.09556	3.06807	-1.04472
61771	4.012	0.3076	-0.0513		2.11028	3.07908	-1.04268
61971	4.048	0.3086	-0.0513		2.12922	3.08909	-1.04268
62171	4.076	0.3095	-0.0514		2.14395	3.0981	-1.04472
62372	4.11	0.3105	-0.0513		2.16183	3.10811	-1.04268
62573	4.138	0.3116	-0.0513		2.17656	3.11912	-1.04268
62773	4.17	0.3125	-0.0513		2.19339	3.12813	-1.04268
62973	4.204	0.3135	-0.0513		2.21127	3.13814	-1.04268
63173	4.236	0.3146	-0.0513		2.22811	3.14915	-1.04268
63374	4.268	0.3156	-0.0514		2.24494	3.15916	-1.04472
63574	4.304	0.3165	-0.0513		2.26387	3.16817	-1.04268
63775	4.334	0.3175	-0.0515		2.27965	3.17818	-1.04675
63975	4.366	0.3185	-0.0514		2.29649	3.18819	-1.04472
64175	4.404	0.3193	-0.0516		2.31647	3.1962	-1.04878
64377	4.44	0.3204	-0.0516		2.33541	3.20721	-1.04878
64578	4.476	0.3214	-0.0514		2.35434	3.21722	-1.04472
64779	4.51	0.3225	-0.0516		2.37223	3.22823	-1.04878
64979	4.546	0.3235	-0.0515		2.39116	3.23824	-1.04675
65179	4.58	0.3245	-0.0514		2.40905	3.24825	-1.04472
65379	4.616	0.3255	-0.0515		2.42798	3.25826	-1.04675
65580	4.648	0.3265	-0.0515		2.44482	3.26827	-1.04675
65781	4.684	0.3275	-0.0514		2.46375	3.27828	-1.04472
65981	4.72	0.3285	-0.0515		2.48269	3.28829	-1.04675
66181	4.756	0.3295	-0.0515		2.50162	3.2983	-1.04675
66381	4.794	0.3304	-0.0516		2.52161	3.30731	-1.04878
66582	4.828	0.3315	-0.0516		2.53949	3.31832	-1.04878
66782	4.864	0.3323	-0.0515		2.55843	3.32633	-1.04675
66983	4.902	0.3334	-0.0516		2.57842	3.33734	-1.04878
67183	4.938	0.3343	-0.0517		2.59735	3.34635	-1.05081
67383	4.974	0.3354	-0.0516		2.61629	3.35736	-1.04878
67585	5.012	0.3362	-0.0515		2.63628	3.36537	-1.04675
67786	5.052	0.3374	-0.0516		2.65732	3.37738	-1.04878
67987	5.086	0.3383	-0.0516		2.6752	3.38639	-1.04878
68187	5.124	0.3393	-0.0514		2.69519	3.3964	-1.04472
68387	5.164	0.3402	-0.0516		2.71623	3.40541	-1.04878
68587	5.204	0.3414	-0.0517		2.73727	3.41742	-1.05081
68788	5.244	0.3425	-0.0515		2.75831	3.42843	-1.04675
68989	5.284	0.3433	-0.0516		2.77935	3.43644	-1.04878
69189	5.324	0.3444	-0.0517		2.80039	3.44745	-1.05081
69389	5.366	0.3454	-0.0515		2.82248	3.45746	-1.04675
69589	5.402	0.3464	-0.0515		2.84141	3.46747	-1.04675
69790	5.44	0.3474	-0.0517		2.8614	3.47748	-1.05081
69990	5.48	0.3485	-0.0516		2.88244	3.48849	-1.04878
70191	5.524	0.3494	-0.0517		2.90558	3.4975	-1.05081
70391	5.56	0.3505	-0.0516		2.92452	3.50851	-1.04878
70591	5.6	0.3514	-0.0516		2.94556	3.51752	-1.04878
70793	5.64	0.3524	-0.0517		2.9666	3.52753	-1.05081
70994	5.682	0.3533	-0.0516		2.98869	3.53654	-1.04878
71195	5.726	0.3543	-0.0516		3.01184	3.54655	-1.04878
71395	5.762	0.3554	-0.0516		3.03077	3.55756	-1.04878
71595	5.804	0.3565	-0.0515		3.05286	3.56857	-1.04675
71795	5.846	0.3574	-0.0515		3.07495	3.57758	-1.04675
71996	5.886	0.3584	-0.0515		3.09599	3.58759	-1.04675
72197	5.928	0.3593	-0.0514		3.11809	3.5966	-1.04472
72397	5.968	0.3603	-0.0515		3.13913	3.60661	-1.04675
72597	6.012	0.3614	-0.0515		3.16227	3.61762	-1.04675
72797	6.05	0.3625	-0.0515		3.18226	3.62863	-1.04675
72998	6.094	0.3634	-0.0515		3.2054	3.63764	-1.04675
73198	6.132	0.3644	-0.0514		3.22539	3.64765	-1.04472
73399	6.176	0.3654	-0.0514		3.24853	3.65766	-1.04472
73599	6.22	0.3663	-0.0515		3.27168	3.66667	-1.04675
73799	6.262	0.3673	-0.0514		3.29377	3.67668	-1.04472
74000	6.304	0.3682	-0.0515		3.31586	3.68569	-1.04675
74200	6.35	0.3693	-0.0515		3.34006	3.6967	-1.04675
74401	6.394	0.3703	-0.0514		3.3632	3.70671	-1.04472
74601	6.442	0.3711	-0.0515		3.38845	3.71471	-1.04675
74801	6.486	0.3721	-0.0514		3.41159	3.72472	-1.04472
75003	6.534	0.3732	-0.0514		3.43684	3.73574	-1.04472
75204	6.576	0.3743	-0.0513		3.45893	3.74675	-1.04268
75405	6.626	0.3753	-0.0513		3.48523	3.75676	-1.04268
75605	6.67	0.3763	-0.0511		3.50837	3.76677	-1.03862
75805	6.718	0.3773	-0.0513		3.53362	3.77678	-1.04268
76005	6.764	0.3783	-0.0513		3.55782	3.78679	-1.04268
76206	6.812	0.3793	-0.0513		3.58306	3.7968	-1.04268
76407	6.858	0.3803	-0.0513		3.60726	3.80681	-1.04268
76607	6.908	0.3812	-0.0513		3.63356	3.81582	-1.04268
76807	6.956	0.3821	-0.0512		3.65881	3.82482	-1.04065
77007	7.004	0.3832	-0.0512		3.68405	3.83584	-1.04065
77208	7.054	0.3843	-0.0511		3.71035	3.84685	-1.03862
77408	7.102	0.3852	-0.0511		3.7356	3.85586	-1.03862
77609	7.154	0.3863	-0.0511		3.76295	3.86687	-1.03862
77809	7.206	0.3873	-0.0511		3.79031	3.87688	-1.03862
78009	7.254	0.3882	-0.0511		3.81555	3.88589	-1.03862
78211	7.306	0.3894	-0.051		3.8429	3.8979	-1.03659
78412	7.356	0.3904	-0.051		3.8692	3.90791	-1.03659
78613	7.408	0.3914	-0.0511		3.89656	3.91792	-1.03862
78813	7.458	0.3924	-0.051		3.92286	3.92793	-1.03659
79013	7.51	0.3935	-0.051		3.95021	3.93894	-1.03659
79213	7.56	0.3944	-0.051		3.97651	3.94795	-1.03659
79414	7.61	0.3954	-0.051		4.00281	3.95796	-1.03659
79615	7.66	0.3963	-0.0509		4.02911	3.96697	-1.03455
79815	7.714	0.3973	-0.0508		4.05751	3.97698	-1.03252
80015	7.762	0.3982	-0.0507		4.08276	3.98599	-1.03049
80215	7.818	0.3993	-0.0506		4.11221	3.997	-1.02846
80416	7.866	0.4003	-0.0506		4.13746	4.00701	-1.02846
80616	7.92	0.4012	-0.0508		4.16586	4.01602	-1.03252
80817	7.97	0.4023	-0.0509		4.19216	4.02703	-1.03455
81017	8.022	0.4033	-0.0509		4.21952	4.03704	-1.03455
81217	8.076	0.4043	-0.0508		4.24792	4.04705	-1.03252
81419	8.124	0.4053	-0.0508		4.27317	4.05706	-1.03252
81620	8.18	0.4062	-0.0508		4.30262	4.06607	-1.03252
81821	8.24	0.4071	-0.0508		4.33418	4.07508	-1.03252
82021	8.298	0.4082	-0.0508		4.36469	4.08609	-1.03252
82221	8.354	0.4092	-0.0507		4.39415	4.0961	-1.03049
82421	8.406	0.4103	-0.0507		4.4215	4.10711	-1.03049
82622	8.466	0.4113	-0.0506		4.45306	4.11712	-1.02846
82823	8.526	0.4122	-0.0506		4.48462	4.12613	-1.02846
83023	8.578	0.4134	-0.0506		4.51197	4.13814	-1.02846
83223	8.636	0.4144	-0.0505		4.54248	4.14815	-1.02642
83423	8.688	0.4153	-0.0505		4.56983	4.15716	-1.02642
83624	8.748	0.4163	-0.0505		4.60139	4.16717	-1.02642
83824	8.808	0.4171	-0.0505		4.63295	4.17518	-1.02642
84025	8.87	0.4181	-0.0505		4.66556	4.18519	-1.02642
84225	8.936	0.4191	-0.0504		4.70027	4.1952	-1.02439
84425	8.998	0.4203	-0.0505		4.73288	4.20721	-1.02642
84627	9.064	0.4212	-0.0505		4.7676	4.21622	-1.02642
84828	9.126	0.4222	-0.0504		4.80021	4.22623	-1.02439
85029	9.19	0.4233	-0.0504		4.83388	4.23724	-1.02439
85229	9.254	0.4243	-0.0503		4.86754	4.24725	-1.02236
85429	9.31	0.4254	-0.0502		4.89699	4.25826	-1.02033
85629	9.372	0.4263	-0.0502		4.92961	4.26727	-1.02033
85830	9.434	0.4272	-0.0503		4.96222	4.27628	-1.02236
86031	9.494	0.4283	-0.0503		4.99378	4.28729	-1.02236
86231	9.552	0.4294	-0.0502		5.02428	4.2983	-1.02033
86431	9.612	0.4304	-0.0501		5.05584	4.30831	-1.01829
86631	9.672	0.4312	-0.0502		5.0874	4.31632	-1.02033
86832	9.736	0.4322	-0.0502		5.12107	4.32633	-1.02033
87032	9.796	0.4332	-0.0502		5.15263	4.33634	-1.02033
87233	9.856	0.4341	-0.0501		5.18419	4.34535	-1.01829
87433	9.918	0.4352	-0.0501		5.2168	4.35636	-1.01829
87633	9.98	0.4362	-0.0501		5.24941	4.36637	-1.01829
87835	10.044	0.437	-0.0501		5.28307	4.37437	-1.01829
88036	10.114	0.438	-0.0501		5.31989	4.38438	-1.01829
88237	10.186	0.4392	-0.0501		5.35776	4.3964	-1.01829
88437	10.266	0.4403	-0.05		5.39984	4.40741	-1.01626
88637	10.334	0.4414	-0.0499		5.43561	4.41842	-1.01423
88837	10.404	0.4424	-0.0498		5.47243	4.42843	-1.0122
89038	10.472	0.4436	-0.0498		5.5082	4.44044	-1.0122
89239	10.534	0.4446	-0.0497		5.54081	4.45045	-1.01016
89439	10.6	0.4456	-0.0498		5.57553	4.46046	-1.0122
89639	10.666	0.4464	-0.0501		5.61024	4.46847	-1.01829
89839	10.732	0.4473	-0.0498		5.64496	4.47748	-1.0122
90040	10.8	0.4483	-0.0498		5.68072	4.48749	-1.0122
90240	10.864	0.4494	-0.0499		5.71439	4.4985	-1.01423
90441	10.934	0.4503	-0.05		5.75121	4.50751	-1.01626
90641	10.998	0.4513	-0.0497		5.78487	4.51752	-1.01016
90841	11.064	0.4523	-0.05		5.81959	4.52753	-1.01626
91043	11.132	0.4533	-0.0498		5.85535	4.53754	-1.0122
91244	11.202	0.4543	-0.0497		5.89217	4.54755	-1.01016
91445	11.268	0.4552	-0.0498		5.92689	4.55656	-1.0122
91645	11.338	0.4561	-0.0498		5.96371	4.56557	-1.0122
91845	11.41	0.457	-0.0499		6.00158	4.57457	-1.01423
92045	11.476	0.4581	-0.0498		6.03629	4.58559	-1.0122
92246	11.548	0.4591	-0.0497		6.07417	4.5956	-1.01016
92447	11.616	0.4599	-0.0498		6.10993	4.6036	-1.0122
92647	11.694	0.461	-0.0498		6.15096	4.61461	-1.0122
92847	11.778	0.4622	-0.0496		6.19514	4.62663	-1.00813
93047	11.86	0.4633	-0.0497		6.23828	4.63764	-1.01016
93248	11.946	0.4643	-0.0497		6.28351	4.64765	-1.01016
93448	12.024	0.4654	-0.0496		6.32454	4.65866	-1.00813
93649	12.104	0.4666	-0.0498		6.36662	4.67067	-1.0122
93849	12.18	0.4677	-0.0494		6.40659	4.68168	-1.00407
94049	12.254	0.4687	-0.0322		6.44552	4.69169	-0.654472
94250	12.324	0.4697	-0.0324		6.48234	4.7017	-0.658537
94450	12.394	0.4707	-0.0323		6.51916	4.71171	-0.656504
94651	12.462	0.4717	-0.0325		6.55492	4.72172	-0.660569
94851	12.534	0.4725	-0.0325		6.5928	4.72973	-0.660569
95051	12.606	0.4736	-0.0325		6.63067	4.74074	-0.660569
95253	12.678	0.4745	-0.0329		6.66854	4.74975	-0.668699
95454	12.752	0.4756	-0.033		6.70746	4.76076	-0.670732
95655	12.826	0.4766	-0.0328		6.74639	4.77077	-0.666667
95855	12.898	0.4774	-0.0329		6.78426	4.77878	-0.668699
96055	12.97	0.4785	-0.033		6.82213	4.78979	-0.670732
96255	13.04	0.4794	-0.033		6.85895	4.7988	-0.670732
96456	13.11	0.4803	-0.0335		6.89577	4.80781	-0.680894
96657	13.184	0.4813	-0.0332		6.93469	4.81782	-0.674797
96857	13.262	0.4823	-0.0333		6.97572	4.82783	-0.676829
97057	13.336	0.4833	-0.0334		7.01464	4.83784	-0.678862
97257	13.416	0.4842	-0.0335		7.05672	4.84685	-0.680894
97458	13.492	0.4853	-0.0337		7.0967	4.85786	-0.684959
97658	13.572	0.4862	-0.0337		7.13878	4.86687	-0.684959
97859	13.652	0.4874	-0.0339		7.18086	4.87888	-0.689024
98059	13.728	0.4883	-0.034		7.22083	4.88789	-0.691057
98259	13.812	0.4892	-0.034		7.26501	4.8969	-0.691057
98461	13.888	0.4902	-0.0341		7.30499	4.90691	-0.693089
98662	13.968	0.4913	-0.0342		7.34707	4.91792	-0.695122
98863	14.046	0.4922	-0.0342		7.3881	4.92693	-0.695122
99063	14.122	0.4932	-0.0344		7.42807	4.93694	-0.699187
99263	14.202	0.4942	-0.0343		7.47015	4.94695	-0.697154
99463	14.276	0.4953	-0.0345		7.50908	4.95796	-0.70122
99664	14.35	0.4963	-0.0345		7.548	4.96797	-0.70122
99865	14.424	0.4972	-0.0346		7.58692	4.97698	-0.703252
100065	14.506	0.4981	-0.0345		7.63005	4.98599	-0.70122
100265	14.582	0.4991	-0.0345		7.67003	4.996	-0.70122
100465	14.658	0.5	-0.0346		7.71	5.00501	-0.703252
100666	14.74	0.5012	-0.0346		7.75314	5.01702	-0.703252
100866	14.812	0.5021	-0.0346		7.79101	5.02603	-0.703252
101067	14.894	0.503	-0.0349		7.83414	5.03504	-0.70935
101267	14.972	0.5041	-0.035		7.87517	5.04605	-0.711382
101467	15.068	0.505	-0.035		7.92566	5.05506	-0.711382
101669	15.168	0.5062	-0.0351		7.97826	5.06707	-0.713415
101870	15.27	0.5074	-0.0352		8.03191	5.07908	-0.715447
102071	15.362	0.5086	-0.0352		8.0803	5.09109	-0.715447
102271	15.45	0.5097	-0.0352		8.12659	5.1021	-0.715447
102471	15.538	0.5107	-0.0353		8.17288	5.11211	-0.71748
102671	15.618	0.5118	-0.0352		8.21496	5.12312	-0.715447
102872	15.708	0.5127	-0.0353		8.2623	5.13213	-0.71748
103073	15.794	0.5136	-0.0353		8.30753	5.14114	-0.71748
103273	15.876	0.5148	-0.0352		8.35066	5.15315	-0.715447
103473	15.958	0.5157	-0.0352		8.3938	5.16216	-0.715447
103673	16.038	0.5166	-0.035		8.43587	5.17117	-0.711382
103874	16.116	0.5176	-0.0352		8.4769	5.18118	-0.715447
104074	16.2	0.5185	-0.0349		8.52109	5.19019	-0.70935
104275	16.282	0.5194	-0.035		8.56422	5.1992	-0.711382
104475	16.362	0.5204	-0.035		8.6063	5.20921	-0.711382
104675	16.446	0.5214	-0.0349		8.65048	5.21922	-0.70935
104877	16.532	0.5225	-0.0349		8.69572	5.23023	-0.70935
105078	16.614	0.5235	-0.0349		8.73885	5.24024	-0.70935
105279	16.7	0.5243	-0.0348		8.78408	5.24825	-0.707317
105479	16.784	0.5254	-0.0347		8.82827	5.25926	-0.705285
105679	16.87	0.5263	-0.0348		8.8735	5.26827	-0.707317
105879	16.954	0.5272	-0.0347		8.91768	5.27728	-0.705285
106080	17.04	0.5283	-0.0347		8.96292	5.28829	-0.705285
106281	17.132	0.5294	-0.0346		9.01131	5.2993	-0.703252
106481	17.222	0.5303	-0.0345		9.05865	5.30831	-0.70122
106681	17.31	0.5314	-0.0345		9.10494	5.31932	-0.70122
106881	17.398	0.5324	-0.0344		9.15123	5.32933	-0.699187
107082	17.482	0.5335	-0.0344		9.19541	5.34034	-0.699187
107282	17.572	0.5342	-0.0344		9.24275	5.34735	-0.699187
107483	17.658	0.5354	-0.0343		9.28798	5.35936	-0.697154
107683	17.748	0.5363	-0.0342		9.33532	5.36837	-0.695122
107883	17.836	0.5374	-0.0342		9.38161	5.37938	-0.695122
108085	17.926	0.5384	-0.0341		9.42895	5.38939	-0.693089
108286	18.014	0.5393	-0.034		9.47524	5.3984	-0.691057
108487	18.098	0.5404	-0.0339		9.51942	5.40941	-0.689024
108687	18.184	0.5412	-0.034		9.56466	5.41742	-0.691057
108887	18.274	0.5423	-0.0339		9.61199	5.42843	-0.689024
109087	18.362	0.5434	-0.0338		9.65828	5.43944	-0.686992
109288	18.446	0.5443	-0.0338		9.70247	5.44845	-0.686992
109489	18.532	0.5452	-0.0337		9.7477	5.45746	-0.684959
109689	18.614	0.5464	-0.0337		9.79083	5.46947	-0.684959
109889	18.704	0.5472	-0.0336		9.83817	5.47748	-0.682927
110089	18.798	0.5482	-0.0335		9.88762	5.48749	-0.680894
110290	18.896	0.5491	-0.0335		9.93916	5.4965	-0.680894
110490	18.992	0.5504	-0.0334		9.98966	5.50951	-0.678862
110691	19.084	0.5515	-0.0334		10.038	5.52052	-0.678862
110891	19.176	0.5526	-0.0333		10.0864	5.53153	-0.676829
111091	19.272	0.5535	-0.0332		10.1369	5.54054	-0.674797
111293	19.364	0.5547	-0.0332		10.1853	5.55255	-0.674797
111494	19.45	0.5556	-0.0331		10.2306	5.56156	-0.672764
111695	19.54	0.5566	-0.033		10.2779	5.57157	-0.670732
111895	19.626	0.5576	-0.033		10.3231	5.58158	-0.670732
112095	19.712	0.5585	-0.0327		10.3684	5.59059	-0.664634
112295	19.802	0.5596	-0.0327		10.4157	5.6016	-0.664634
112496	19.888	0.5605	-0.0328		10.4609	5.61061	-0.666667
112697	19.972	0.5616	-0.0326		10.5051	5.62162	-0.662602
112897	20.056	0.5625	-0.0326		10.5493	5.63063	-0.662602
113097	20.142	0.5634	-0.0326		10.5945	5.63964	-0.662602
113297	20.228	0.5644	-0.0326		10.6398	5.64965	-0.662602
113498	20.314	0.5654	-0.0326		10.685	5.65966	-0.662602
113698	20.4	0.5662	-0.0325		10.7303	5.66767	-0.660569
113899	20.482	0.5672	-0.0322		10.7734	5.67768	-0.654472
114099	20.572	0.5682	-0.0323		10.8207	5.68769	-0.656504
114299	20.666	0.5692	-0.0324		10.8702	5.6977	-0.658537
114500	20.768	0.5703	-0.0323		10.9238	5.70871	-0.656504
114700	20.87	0.5714	-0.0321		10.9775	5.71972	-0.652439
114901	20.966	0.5724	-0.0321		11.028	5.72973	-0.652439
115101	21.062	0.5735	-0.0321		11.0785	5.74074	-0.652439
115301	21.16	0.5745	-0.032		11.13	5.75075	-0.650407
115503	21.256	0.5756	-0.0318		11.1805	5.76176	-0.646341
115704	21.35	0.5765	-0.0317		11.2299	5.77077	-0.644309
115905	21.442	0.5776	-0.0316		11.2783	5.78178	-0.642276
116105	21.53	0.5787	-0.0316		11.3246	5.79279	-0.642276
116305	21.62	0.5796	-0.0315		11.372	5.8018	-0.640244
116505	21.708	0.5806	-0.0316		11.4183	5.81181	-0.642276
116706	21.8	0.5816	-0.0314		11.4666	5.82182	-0.638211
116907	21.886	0.5825	-0.0314		11.5119	5.83083	-0.638211
117107	21.972	0.5834	-0.0313		11.5571	5.83984	-0.636179
117307	22.06	0.5844	-0.0313		11.6034	5.84985	-0.636179
117507	22.148	0.5854	-0.0314		11.6497	5.85986	-0.638211
117708	22.24	0.5865	-0.0314		11.6981	5.87087	-0.638211
117908	22.326	0.5874	-0.0313		11.7433	5.87988	-0.636179
118109	22.416	0.5884	-0.0313		11.7907	5.88989	-0.636179
118309	22.502	0.5892	-0.0312		11.8359	5.8979	-0.634146
118509	22.594	0.5902	-0.0312		11.8843	5.90791	-0.634146
118711	22.688	0.5912	-0.0311		11.9337	5.91792	-0.632114
118912	22.784	0.5922	-0.0311		11.9842	5.92793	-0.632114
119113	22.874	0.5933	-0.031		12.0316	5.93894	-0.630081
119313	22.97	0.5943	-0.0309		12.0821	5.94895	-0.628049
119513	23.068	0.5954	-0.0308		12.1336	5.95996	-0.626016
119713	23.168	0.5962	-0.031		12.1862	5.96797	-0.630081
119914	23.27	0.5974	-0.0309		12.2399	5.97998	-0.628049
120115	23.366	0.5985	-0.0309		12.2904	5.99099	-0.628049
120315	23.462	0.5995	-0.0308		12.3408	6.001	-0.626016
120515	23.558	0.6005	-0.0308		12.3913	6.01101	-0.626016
120715	23.648	0.6015	-0.0307		12.4387	6.02102	-0.623984
120916	23.74	0.6026	-0.0306		12.4871	6.03203	-0.621951
121116	23.832	0.6035	-0.0307		12.5355	6.04104	-0.623984
121317	23.922	0.6044	-0.0307		12.5828	6.05005	-0.623984
121517	24.008	0.6056	-0.0307		12.628	6.06206	-0.623984
121717	24.098	0.6064	-0.0306		12.6754	6.07007	-0.621951
121919	24.19	0.6075	-0.0305		12.7238	6.08108	-0.619919
122120	24.282	0.6084	-0.0305		12.7722	6.09009	-0.619919
122321	24.37	0.6095	-0.0304		12.8184	6.1011	-0.617886
122521	24.47	0.6103	-0.0304		12.871	6.10911	-0.617886
122721	24.566	0.6114	-0.0303		12.9215	6.12012	-0.615854
122921	24.662	0.6125	-0.0303		12.972	6.13113	-0.615854
123122	24.756	0.6135	-0.0302		13.0215	6.14114	-0.613821
123323	24.846	0.6147	-0.0302		13.0688	6.15315	-0.613821
123523	24.94	0.6156	-0.0302		13.1183	6.16216	-0.613821
123723	25.028	0.6164	-0.0302		13.1646	6.17017	-0.613821
123923	25.12	0.6175	-0.0301		13.2129	6.18118	-0.611789
124124	25.214	0.6186	-0.0301		13.2624	6.19219	-0.611789
124324	25.304	0.6195	-0.0301		13.3097	6.2012	-0.611789
124525	25.39	0.6204	-0.03		13.355	6.21021	-0.609756
124725	25.48	0.6214	-0.0299		13.4023	6.22022	-0.607724
124925	25.57	0.6226	-0.03		13.4496	6.23223	-0.609756
125127	25.662	0.6234	-0.0299		13.498	6.24024	-0.607724
125328	25.756	0.6244	-0.0299		13.5475	6.25025	-0.607724
125529	25.846	0.6253	-0.0298		13.5948	6.25926	-0.605691
125729	25.944	0.6264	-0.0298		13.6464	6.27027	-0.605691
125929	26.046	0.6275	-0.0297		13.7	6.28128	-0.603659
126129	26.146	0.6287	-0.0297		13.7526	6.29329	-0.603659
126330	26.244	0.6296	-0.0296		13.8042	6.3023	-0.601626
126531	26.338	0.6306	-0.0295		13.8536	6.31231	-0.599593
126731	26.43	0.6316	-0.0295		13.902	6.32232	-0.599593
126931	26.522	0.6326	-0.0296		13.9504	6.33233	-0.601626
127131	26.614	0.6337	-0.0295		13.9988	6.34334	-0.599593
127332	26.704	0.6346	-0.0295		14.0461	6.35235	-0.599593
127532	26.792	0.6357	-0.0294		14.0924	6.36336	-0.597561
127733	26.884	0.6366	-0.0294		14.1408	6.37237	-0.597561
127933	26.976	0.6375	-0.0294		14.1892	6.38138	-0.597561
128133	27.068	0.6384	-0.0293		14.2376	6.39039	-0.595528
128335	27.164	0.6395	-0.0293		14.2881	6.4014	-0.595528
128536	27.262	0.6405	-0.0292		14.3396	6.41141	-0.593496
128737	27.354	0.6415	-0.0293		14.388	6.42142	-0.595528
128937	27.448	0.6426	-0.0292		14.4375	6.43243	-0.593496
129137	27.542	0.6435	-0.029		14.4869	6.44144	-0.589431
129337	27.638	0.6445	-0.0291		14.5374	6.45145	-0.591463
129538	27.732	0.6455	-0.029		14.5868	6.46146	-0.589431
129739	27.824	0.6466	-0.029		14.6352	6.47247	-0.589431
129939	27.912	0.6475	-0.029		14.6815	6.48148	-0.589431
130139	28	0.6485	-0.0288		14.7278	6.49149	-0.585366
130339	28.088	0.6494	-0.0288		14.7741	6.5005	-0.585366
130540	28.184	0.6503	-0.0287		14.8246	6.50951	-0.583333
130740	28.282	0.6514	-0.0287		14.8761	6.52052	-0.583333
130941	28.378	0.6525	-0.0288		14.9266	6.53153	-0.585366
131141	28.474	0.6534	-0.0286		14.9771	6.54054	-0.581301
131341	28.57	0.6544	-0.0285		15.0276	6.55055	-0.579268
131543	28.664	0.6556	-0.0285		15.0771	6.56256	-0.579268
131744	28.758	0.6565	-0.0285		15.1265	6.57157	-0.579268
131945	28.852	0.6574	-0.0285		15.1759	6.58058	-0.579268
132145	28.946	0.6585	-0.0284		15.2254	6.59159	-0.577236
132345	29.036	0.6594	-0.0284		15.2727	6.6006	-0.577236
132545	29.132	0.6604	-0.0284		15.3232	6.61061	-0.577236
132746	29.222	0.6613	-0.0283		15.3706	6.61962	-0.575203
132947	29.316	0.6625	-0.0283		15.42	6.63163	-0.575203
133147	29.408	0.6633	-0.0282		15.4684	6.63964	-0.573171
133347	29.5	0.6643	-0.0282		15.5168	6.64965	-0.573171
133547	29.592	0.6653	-0.0282		15.5652	6.65966	-0.573171
133748	29.686	0.6664	-0.0282		15.6146	6.67067	-0.573171
133948	29.78	0.6674	-0.0282		15.6641	6.68068	-0.573171
134149	29.88	0.6684	-0.0282		15.7167	6.69069	-0.573171
134349	29.978	0.6695	-0.0282		15.7682	6.7017	-0.573171
134549	30.08	0.6703	-0.0282		15.8219	6.70971	-0.573171
134750	30.18	0.6716	-0.0281		15.8745	6.72272	-0.571138
134950	30.282	0.6725	-0.0279		15.9281	6.73173	-0.567073
135151	30.374	0.6735	-0.028		15.9765	6.74174	-0.569106
135351	30.466	0.6746	-0.028		16.0249	6.75275	-0.569106
135551	30.56	0.6755	-0.0279		16.0743	6.76176	-0.567073
135753	30.656	0.6764	-0.028		16.1248	6.77077	-0.569106
135954	30.758	0.6774	-0.0279		16.1785	6.78078	-0.567073
136155	30.856	0.6785	-0.028		16.23	6.79179	-0.569106
136355	30.954	0.6796	-0.0279		16.2816	6.8028	-0.567073
136555	31.052	0.6808	-0.0277		16.3331	6.81481	-0.563008
136755	31.148	0.6817	-0.0278		16.3836	6.82382	-0.565041
136956	31.24	0.6827	-0.0277		16.432	6.83383	-0.563008
137157	31.338	0.6837	-0.0276		16.4836	6.84384	-0.560976
137357	31.43	0.6846	-0.0276		16.532	6.85285	-0.560976
137557	31.52	0.6855	-0.0276		16.5793	6.86186	-0.560976
137757	31.612	0.6866	-0.0276		16.6277	6.87287	-0.560976
137958	31.706	0.6876	-0.0275		16.6771	6.88288	-0.558943
138158	31.798	0.6885	-0.0276		16.7255	6.89189	-0.560976
138359	31.89	0.6894	-0.0274		16.7739	6.9009	-0.556911
138559	31.986	0.6905	-0.0274		16.8244	6.91191	-0.556911
138759	32.082	0.6915	-0.0274		16.8749	6.92192	-0.556911
138961	32.178	0.6924	-0.0273		16.9254	6.93093	-0.554878
139162	32.274	0.6936	-0.0273		16.9759	6.94294	-0.554878
139363	32.372	0.6945	-0.0273		17.0274	6.95195	-0.554878
139563	32.46	0.6957	-0.0272		17.0737	6.96396	-0.552846
139763	32.55	0.6965	-0.0272		17.1211	6.97197	-0.552846
139963	32.64	0.6976	-0.0271		17.1684	6.98298	-0.550813
140164	32.74	0.6985	-0.0271		17.221	6.99199	-0.550813
140365	32.834	0.6996	-0.0271		17.2705	7.003	-0.550813
140565	32.926	0.7006	-0.0271		17.3188	7.01301	-0.550813
140765	33.022	0.7016	-0.027		17.3693	7.02302	-0.54878
140965	33.11	0.7025	-0.027		17.4156	7.03203	-0.54878
141166	33.206	0.7035	-0.027		17.4661	7.04204	-0.54878
141366	33.296	0.7043	-0.0269		17.5135	7.05005	-0.546748
141567	33.388	0.7054	-0.0269		17.5619	7.06106	-0.546748
141767	33.48	0.7065	-0.0268		17.6102	7.07207	-0.544715
141967	33.57	0.7074	-0.0268		17.6576	7.08108	-0.544715
142169	33.662	0.7083	-0.0268		17.706	7.09009	-0.544715
142370	33.76	0.7093	-0.0268		17.7575	7.1001	-0.544715
142571	33.882	0.7105	-0.0267		17.8217	7.11211	-0.542683
142771	34.002	0.7116	-0.0266		17.8848	7.12312	-0.54065
142971	34.112	0.7128	-0.0265		17.9427	7.13514	-0.538618
143171	34.218	0.7138	-0.0264		17.9984	7.14515	-0.536585
143372	34.318	0.715	-0.0265		18.051	7.15716	-0.538618
143573	34.416	0.7159	-0.0264		18.1026	7.16617	-0.536585
143773	34.514	0.7169	-0.0265		18.1541	7.17618	-0.538618
143973	34.608	0.7179	-0.0263		18.2036	7.18619	-0.534553
144173	34.702	0.719	-0.0262		18.253	7.1972	-0.53252
144374	34.794	0.72	-0.0262		18.3014	7.20721	-0.53252
144574	34.882	0.721	-0.0263		18.3477	7.21722	-0.534553
144775	34.968	0.722	-0.0263		18.3929	7.22723	-0.534553
144975	35.06	0.7228	-0.0261		18.4413	7.23524	-0.530488
145175	35.15	0.7239	-0.0262		18.4887	7.24625	-0.53252
145377	35.242	0.7247	-0.0261		18.537	7.25425	-0.530488
145578	35.332	0.7259	-0.0261		18.5844	7.26627	-0.530488
145779	35.422	0.7268	-0.0261		18.6317	7.27528	-0.530488
145979	35.512	0.7278	-0.026		18.6791	7.28529	-0.528455
146179	35.596	0.7287	-0.026		18.7232	7.29429	-0.528455
146379	35.688	0.7295	-0.026		18.7716	7.3023	-0.528455
146580	35.78	0.7305	-0.0259		18.82	7.31231	-0.526423
146781	35.872	0.7315	-0.0259		18.8684	7.32232	-0.526423
146981	35.962	0.7326	-0.0259		18.9158	7.33333	-0.526423
147181	36.052	0.7335	-0.0258		18.9631	7.34234	-0.52439
147381	36.146	0.7345	-0.0257		19.0125	7.35235	-0.522358
147582	36.244	0.7354	-0.0257		19.0641	7.36136	-0.522358
147782	36.342	0.7363	-0.0257		19.1156	7.37037	-0.522358
147983	36.44	0.7375	-0.0257		19.1672	7.38238	-0.522358
148183	36.542	0.7385	-0.0256		19.2208	7.39239	-0.520325
148383	36.644	0.7397	-0.0257		19.2745	7.4044	-0.522358
148585	36.746	0.7407	-0.0255		19.3281	7.41441	-0.518293
148786	36.84	0.7415	-0.0256		19.3776	7.42242	-0.520325
148987	36.938	0.7425	-0.0255		19.4291	7.43243	-0.518293
149187	37.04	0.7437	-0.0254		19.4828	7.44444	-0.51626
149387	37.136	0.7447	-0.0255		19.5333	7.45445	-0.518293
149587	37.234	0.7458	-0.0253		19.5848	7.46547	-0.514228
149788	37.326	0.7467	-0.0253		19.6332	7.47447	-0.514228
149989	37.416	0.7477	-0.0253		19.6806	7.48448	-0.514228
150189	37.504	0.7485	-0.0253		19.7268	7.49249	-0.514228
150389	37.6	0.7496	-0.0251		19.7773	7.5035	-0.510163
150589	37.694	0.7506	-0.0251		19.8268	7.51351	-0.510163
150790	37.788	0.7516	-0.025		19.8762	7.52352	-0.50813
150990	37.886	0.7525	-0.0251		19.9278	7.53253	-0.510163
151191	37.986	0.7537	-0.0249		19.9804	7.54454	-0.506098
151391	38.082	0.7546	-0.0249		20.0309	7.55355	-0.506098
151591	38.178	0.7555	-0.0249		20.0814	7.56256	-0.506098
151793	38.274	0.7566	-0.0249		20.1319	7.57357	-0.506098
151994	38.368	0.7576	-0.0248		20.1813	7.58358	-0.504065
152195	38.46	0.7586	-0.0247		20.2297	7.59359	-0.502033
152395	38.554	0.7596	-0.0245		20.2791	7.6036	-0.497967
152595	38.642	0.7606	-0.0245		20.3254	7.61361	-0.497967
152795	38.75	0.7616	-0.0245		20.3822	7.62362	-0.497967
152996	38.854	0.7627	-0.0246		20.4369	7.63463	-0.5
153197	38.956	0.7638	-0.0244		20.4906	7.64565	-0.495935
153397	39.054	0.7649	-0.0244		20.5421	7.65666	-0.495935
153597	39.15	0.7657	-0.0242		20.5926	7.66466	-0.49187
153797	39.246	0.7668	-0.0244		20.6431	7.67568	-0.495935
153998	39.34	0.7678	-0.0243		20.6926	7.68569	-0.493902
154198	39.434	0.7687	-0.0243		20.742	7.69469	-0.493902
154399	39.526	0.7698	-0.0243		20.7904	7.70571	-0.493902
154599	39.614	0.7708	-0.0243		20.8367	7.71572	-0.493902
154799	39.71	0.7717	-0.0241		20.8872	7.72472	-0.489837
155000	39.804	0.7727	-0.0241		20.9366	7.73473	-0.489837
155200	39.898	0.7738	-0.024		20.9861	7.74575	-0.487805
155401	39.99	0.7747	-0.024		21.0345	7.75475	-0.487805
155601	40.086	0.7756	-0.024		21.085	7.76376	-0.487805
155801	40.18	0.7765	-0.0237		21.1344	7.77277	-0.481707
156003	40.272	0.7776	-0.0237		21.1828	7.78378	-0.481707
156204	40.364	0.7786	-0.0236		21.2312	7.79379	-0.479675
156405	40.454	0.7796	-0.0236		21.2785	7.8038	-0.479675
156605	40.544	0.7805	-0.0237		21.3259	7.81281	-0.481707
156805	40.636	0.7815	-0.0235		21.3742	7.82282	-0.477642
157005	40.73	0.7824	-0.0236		21.4237	7.83183	-0.479675
157206	40.82	0.7835	-0.0233		21.471	7.84284	-0.473577
157407	40.91	0.7843	-0.0233		21.5184	7.85085	-0.473577
157607	41.008	0.7854	-0.0232		21.5699	7.86186	-0.471545
157807	41.114	0.7865	-0.0232		21.6257	7.87287	-0.471545
158007	41.23	0.7876	-0.0232		21.6867	7.88388	-0.471545
158208	41.334	0.7886	-0.0231		21.7414	7.89389	-0.469512
158408	41.436	0.7897	-0.0232		21.795	7.9049	-0.471545
158609	41.538	0.7907	-0.0231		21.8487	7.91491	-0.469512
158809	41.634	0.7918	-0.023		21.8992	7.92593	-0.46748
159009	41.736	0.7927	-0.023		21.9528	7.93493	-0.46748
159211	41.83	0.7937	-0.023		22.0023	7.94494	-0.46748
159412	41.926	0.7948	-0.0228		22.0528	7.95596	-0.463415
159613	42.018	0.7957	-0.0228		22.1012	7.96496	-0.463415
159813	42.11	0.7966	-0.0226		22.1496	7.97397	-0.45935
160013	42.204	0.7978	-0.0226		22.199	7.98599	-0.45935
160213	42.29	0.7987	-0.0226		22.2442	7.99499	-0.45935
160414	42.382	0.7996	-0.0225		22.2926	8.004	-0.457317
160615	42.474	0.8005	-0.0225		22.341	8.01301	-0.457317
160815	42.566	0.8016	-0.0225		22.3894	8.02402	-0.457317
161015	42.662	0.8026	-0.0223		22.4399	8.03403	-0.453252
161215	42.762	0.8037	-0.0225		22.4925	8.04505	-0.457317
161416	42.86	0.8047	-0.0223		22.5441	8.05506	-0.453252
161616	42.95	0.8057	-0.0223		22.5914	8.06507	-0.453252
161817	43.044	0.8067	-0.0223		22.6408	8.07508	-0.453252
162017	43.136	0.8076	-0.0223		22.6892	8.08408	-0.453252
162217	43.228	0.8086	-0.0222		22.7376	8.09409	-0.45122
162419	43.322	0.8096	-0.0222		22.7871	8.1041	-0.45122
162620	43.416	0.8106	-0.0221		22.8365	8.11411	-0.449187
162821	43.508	0.8115	-0.0221		22.8849	8.12312	-0.449187
163021	43.602	0.8126	-0.022		22.9343	8.13413	-0.447154
163221	43.692	0.8136	-0.0219		22.9817	8.14414	-0.445122
163421	43.794	0.8145	-0.022		23.0353	8.15315	-0.447154
163622	43.896	0.8155	-0.0219		23.089	8.16316	-0.445122
163823	43.99	0.8167	-0.0218		23.1384	8.17518	-0.443089
164023	44.088	0.8176	-0.0216		23.19	8.18418	-0.439024
164223	44.184	0.8186	-0.0217		23.2405	8.19419	-0.441057
164423	44.282	0.8198	-0.0216		23.292	8.20621	-0.439024
164624	44.376	0.8208	-0.0215		23.3415	8.21622	-0.436992
164824	44.468	0.8218	-0.0215		23.3899	8.22623	-0.436992
165025	44.558	0.8227	-0.0215		23.4372	8.23524	-0.436992
165225	44.65	0.8238	-0.0214		23.4856	8.24625	-0.434959
165425	44.742	0.8247	-0.0213		23.534	8.25526	-0.432927
165627	44.834	0.8257	-0.0213		23.5824	8.26527	-0.432927
165828	44.924	0.8266	-0.0212		23.6297	8.27427	-0.430894
166029	45.012	0.8275	-0.0212		23.676	8.28328	-0.430894
166229	45.102	0.8285	-0.0211		23.7233	8.29329	-0.428862
166429	45.194	0.8296	-0.0208		23.7717	8.3043	-0.422764
166629	45.288	0.8305	-0.0209		23.8212	8.31331	-0.424797
166830	45.38	0.8317	-0.021		23.8696	8.32533	-0.426829
167031	45.474	0.8326	-0.0209		23.919	8.33433	-0.424797
167231	45.574	0.8337	-0.0208		23.9716	8.34535	-0.422764
167431	45.666	0.8346	-0.0208		24.02	8.35435	-0.422764
167631	45.76	0.8356	-0.0207		24.0694	8.36436	-0.420732
167832	45.854	0.8365	-0.0206		24.1189	8.37337	-0.418699
168032	45.946	0.8376	-0.0206		24.1673	8.38438	-0.418699
168233	46.036	0.8386	-0.0206		24.2146	8.39439	-0.418699
168433	46.128	0.8397	-0.0205		24.263	8.40541	-0.416667
168633	46.218	0.8405	-0.0203		24.3103	8.41341	-0.412602
168835	46.316	0.8415	-0.0202		24.3619	8.42342	-0.410569
169036	46.416	0.8427	-0.0201		24.4145	8.43544	-0.408537
169237	46.512	0.8435	-0.02		24.465	8.44344	-0.406504
169437	46.612	0.8447	-0.0202		24.5176	8.45546	-0.410569
169637	46.71	0.8457	-0.0199		24.5691	8.46547	-0.404472
169837	46.808	0.8469	-0.015		24.6207	8.47748	-0.304878
170038	46.906	0.8477	-0.0152		24.6722	8.48549	-0.308943
170239	46.998	0.8488	-0.015		24.7206	8.4965	-0.304878
170439	47.09	0.8498	-0.015		24.769	8.50651	-0.304878
170639	47.182	0.8508	-0.0151		24.8174	8.51652	-0.306911
170839	47.272	0.8518	-0.015		24.8647	8.52653	-0.304878
171040	47.364	0.8528	-0.0151		24.9131	8.53654	-0.306911
171240	47.452	0.8538	-0.0149		24.9594	8.54655	-0.302846
171441	47.54	0.8546	-0.0151		25.0057	8.55455	-0.306911
171641	47.634	0.8556	-0.0149		25.0551	8.56456	-0.302846
171841	47.726	0.8566	-0.015		25.1035	8.57457	-0.304878
172043	47.814	0.8576	-0.0149		25.1498	8.58458	-0.302846
172244	47.9	0.8588	-0.015		25.1951	8.5966	-0.304878
172445	47.988	0.8596	-0.0149		25.2413	8.6046	-0.302846
172645	48.076	0.8606	-0.0149		25.2876	8.61461	-0.302846
172845	48.168	0.8616	-0.0148		25.336	8.62462	-0.300813
173045	48.276	0.8625	-0.0148		25.3928	8.63363	-0.300813
173246	48.374	0.8636	-0.0148		25.4444	8.64464	-0.300813
173447	48.474	0.8647	-0.0148		25.497	8.65566	-0.300813
173647	48.566	0.8656	-0.0147		25.5454	8.66466	-0.29878
173847	48.66	0.8668	-0.0146		25.5948	8.67668	-0.296748
174047	48.754	0.8676	-0.0147		25.6443	8.68468	-0.29878
174248	48.846	0.8687	-0.0147		25.6927	8.6957	-0.29878
174448	48.938	0.8697	-0.0146		25.741	8.70571	-0.296748
174649	49.03	0.8708	-0.0145		25.7894	8.71672	-0.294715
174849	49.124	0.8716	-0.0146		25.8389	8.72472	-0.296748
175049	49.218	0.8728	-0.0145		25.8883	8.73674	-0.294715
175250	49.31	0.8738	-0.0146		25.9367	8.74675	-0.296748
175450	49.402	0.8747	-0.0145		25.9851	8.75576	-0.294715
175651	49.494	0.8756	-0.0144		26.0335	8.76476	-0.292683
175851	49.584	0.8767	-0.0143		26.0808	8.77578	-0.29065
176051	49.682	0.8777	-0.0144		26.1324	8.78579	-0.292683
176253	49.782	0.8786	-0.0144		26.185	8.79479	-0.292683
176454	49.878	0.8798	-0.0142		26.2355	8.80681	-0.288618
176655	49.972	0.8808	-0.0142		26.2849	8.81682	-0.288618
176855	50.066	0.8818	-0.0142		26.3344	8.82683	-0.288618
177055	50.16	0.8828	-0.0142		26.3838	8.83684	-0.288618
177255	50.25	0.8838	-0.014		26.4311	8.84685	-0.284553
177456	50.338	0.8848	-0.0142		26.4774	8.85686	-0.288618
177657	50.428	0.8858	-0.0141		26.5248	8.86687	-0.286585
177857	50.514	0.8868	-0.0141		26.57	8.87688	-0.286585
178057	50.604	0.8878	-0.0141		26.6173	8.88689	-0.286585
178257	50.69	0.8886	-0.014		26.6626	8.89489	-0.284553
178458	50.782	0.8896	-0.014		26.711	8.9049	-0.284553
178658	50.868	0.8906	-0.0139		26.7562	8.91491	-0.28252
178859	50.958	0.8916	-0.0138		26.8035	8.92492	-0.280488
179059	51.042	0.8926	-0.0139		26.8477	8.93493	-0.28252
179259	51.128	0.8937	-0.0139		26.893	8.94595	-0.28252
179461	51.222	0.8946	-0.0138		26.9424	8.95495	-0.280488
179662	51.32	0.8956	-0.0137		26.994	8.96496	-0.278455
179863	51.42	0.8967	-0.0137		27.0466	8.97598	-0.278455
180063	51.52	0.8977	-0.0137		27.0992	8.98599	-0.278455
180263	51.614	0.8987	-0.0137		27.1486	8.996	-0.278455
180463	51.71	0.8998	-0.0136		27.1991	9.00701	-0.276423
180664	51.8	0.9008	-0.0136		27.2464	9.01702	-0.276423
180865	51.894	0.9017	-0.0136		27.2959	9.02603	-0.276423
181065	51.996	0.9028	-0.0133		27.3495	9.03704	-0.270325
181265	52.088	0.9038	-0.0135		27.3979	9.04705	-0.27439
181465	52.18	0.9048	-0.0133		27.4463	9.05706	-0.270325
181666	52.276	0.9058	-0.0132		27.4968	9.06707	-0.268293
181866	52.374	0.9069	-0.0132		27.5484	9.07808	-0.268293
182067	52.464	0.9079	-0.0131		27.5957	9.08809	-0.26626
182267	52.552	0.9088	-0.0132		27.642	9.0971	-0.268293
182467	52.642	0.9099	-0.013		27.6893	9.10811	-0.264228
182669	52.734	0.9107	-0.0131		27.7377	9.11612	-0.26626
182870	52.828	0.9118	-0.0132		27.7872	9.12713	-0.268293
183071	52.916	0.9129	-0.0131		27.8334	9.13814	-0.26626
183271	53.01	0.9138	-0.013		27.8829	9.14715	-0.264228
183471	53.104	0.9149	-0.013		27.9323	9.15816	-0.264228
183671	53.196	0.9157	-0.0128		27.9807	9.16617	-0.260163
183872	53.288	0.9167	-0.0127		28.0291	9.17618	-0.25813
184073	53.382	0.9178	-0.0128		28.0786	9.18719	-0.260163
184273	53.47	0.9188	-0.0126		28.1248	9.1972	-0.256098
184473	53.57	0.9199	-0.0128		28.1774	9.20821	-0.260163
184673	53.662	0.9209	-0.0127		28.2258	9.21822	-0.25813
184874	53.754	0.9219	-0.0127		28.2742	9.22823	-0.25813
185074	53.848	0.9227	-0.0125		28.3237	9.23624	-0.254065
185275	53.94	0.9239	-0.0124		28.3721	9.24825	-0.252033
185475	54.032	0.9249	-0.0124		28.4205	9.25826	-0.252033
185675	54.12	0.9259	-0.0125		28.4667	9.26827	-0.254065
185877	54.21	0.9268	-0.0125		28.5141	9.27728	-0.254065
186078	54.294	0.9277	-0.0124		28.5583	9.28629	-0.252033
186279	54.382	0.9287	-0.0123		28.6045	9.2963	-0.25
186479	54.466	0.9297	-0.0123		28.6487	9.30631	-0.25
186679	54.558	0.9306	-0.0122		28.6971	9.31532	-0.247967
186879	54.646	0.9316	-0.0124		28.7434	9.32533	-0.252033
187080	54.736	0.9326	-0.012		28.7907	9.33534	-0.243902
187281	54.82	0.9336	-0.012		28.8349	9.34535	-0.243902
187481	54.924	0.9346	-0.0119		28.8896	9.35536	-0.24187
187681	55.026	0.9355	-0.0119		28.9433	9.36436	-0.24187
187881	55.134	0.9367	-0.0118		29.0001	9.37638	-0.239837
188082	55.236	0.9379	-0.0118		29.0537	9.38839	-0.239837
188282	55.334	0.9389	-0.0119		29.1053	9.3984	-0.24187
188483	55.43	0.9399	-0.0117		29.1558	9.40841	-0.237805
188683	55.52	0.9409	-0.0117		29.2031	9.41842	-0.237805
188883	55.61	0.942	-0.0116		29.2505	9.42943	-0.235772
189085	55.704	0.9429	-0.0118		29.2999	9.43844	-0.239837
189286	55.796	0.9439	-0.0117		29.3483	9.44845	-0.237805
189487	55.886	0.945	-0.0117		29.3956	9.45946	-0.237805
189687	55.968	0.9458	-0.0117		29.4388	9.46747	-0.237805
189887	56.054	0.9469	-0.0116		29.484	9.47848	-0.235772
190087	56.14	0.9478	-0.0116		29.5292	9.48749	-0.235772
190288	56.228	0.9488	-0.0115		29.5755	9.4975	-0.23374
190489	56.314	0.9497	-0.0115		29.6208	9.50651	-0.23374
190689	56.398	0.9506	-0.0114		29.6649	9.51552	-0.231707
190889	56.486	0.9517	-0.0113		29.7112	9.52653	-0.229675
191089	56.58	0.9527	-0.0113		29.7607	9.53654	-0.229675
191290	56.674	0.9537	-0.0112		29.8101	9.54655	-0.227642
191490	56.768	0.9548	-0.0111		29.8596	9.55756	-0.22561
191691	56.87	0.9558	-0.011		29.9132	9.56757	-0.223577
191891	56.976	0.9568	-0.0109		29.969	9.57758	-0.221545
192091	57.082	0.9579	-0.0108		30.0247	9.58859	-0.219512
192293	57.184	0.9591	-0.0106		30.0784	9.6006	-0.215447
192494	57.282	0.9602	-0.0107		30.1299	9.61161	-0.21748
192695	57.376	0.9613	-0.0107		30.1794	9.62262	-0.21748
192895	57.462	0.9623	-0.0106		30.2246	9.63263	-0.215447
193095	57.552	0.9632	-0.0106		30.2719	9.64164	-0.215447
193295	57.642	0.9641	-0.0104		30.3193	9.65065	-0.211382
193496	57.726	0.9651	-0.0103		30.3635	9.66066	-0.20935
193697	57.812	0.9662	-0.0103		30.4087	9.67167	-0.20935
193897	57.896	0.9671	-0.0102		30.4529	9.68068	-0.207317
194097	57.982	0.968	-0.0102		30.4981	9.68969	-0.207317
194297	58.064	0.9692	-0.01		30.5413	9.7017	-0.203252
194498	58.15	0.97	-0.01		30.5865	9.70971	-0.203252
194698	58.242	0.971	-0.0099		30.6349	9.71972	-0.20122
194899	58.338	0.972	-0.0098		30.6854	9.72973	-0.199187
195099	58.434	0.973	-0.0097		30.7359	9.73974	-0.197154
195299	58.522	0.9741	-0.0096		30.7822	9.75075	-0.195122
195500	58.612	0.9751	-0.0096		30.8295	9.76076	-0.195122
195700	58.702	0.9761	-0.0096		30.8768	9.77077	-0.195122
195901	58.784	0.977	-0.0095		30.92	9.77978	-0.193089
196101	58.872	0.978	-0.0094		30.9663	9.78979	-0.191057
196301	58.952	0.979	-0.0094		31.0083	9.7998	-0.191057
196503	59.042	0.9799	-0.0093		31.0557	9.80881	-0.189024
196704	59.132	0.981	-0.0092		31.103	9.81982	-0.186992
196905	59.222	0.982	-0.0092		31.1504	9.82983	-0.186992
197105	59.31	0.9829	-0.009		31.1966	9.83884	-0.182927
197305	59.396	0.9839	-0.0089		31.2419	9.84885	-0.180894
197505	59.482	0.9849	-0.0088		31.2871	9.85886	-0.178862
197706	59.568	0.9859	-0.0087		31.3323	9.86887	-0.176829
197907	59.656	0.9869	-0.0087		31.3786	9.87888	-0.176829
198107	59.742	0.9879	-0.0086		31.4239	9.88889	-0.174797
198307	59.83	0.9889	-0.0086		31.4702	9.8989	-0.174797
198507	59.914	0.9899	-0.0085		31.5143	9.90891	-0.172764
198708	60.006	0.9908	-0.0083		31.5627	9.91792	-0.168699
198908	60.1	0.9918	-0.0084		31.6122	9.92793	-0.170732
199109	60.194	0.9928	-0.0081		31.6616	9.93794	-0.164634
199309	60.282	0.9938	-0.008		31.7079	9.94795	-0.162602
199509	60.37	0.9948	-0.0081		31.7542	9.95796	-0.164634
199711	60.456	0.9959	-0.0079		31.7994	9.96897	-0.160569
199912	60.55	0.9968	-0.0079		31.8489	9.97798	-0.160569
200113	60.638	0.9977	-0.0079		31.8952	9.98699	-0.160569
200313	60.738	0.9989	-0.0078		31.9478	9.999	-0.158537
200513	60.832	0.9999	-0.0077		31.9972	10.009	-0.156504
200713	60.926	1.001	-0.0076		32.0466	10.02	-0.154472
200914	61.018	1.002	-0.0075		32.095	10.03	-0.152439
201115	61.108	1.0031	-0.0074		32.1424	10.041	-0.150407
201315	61.192	1.004	-0.0074		32.1866	10.0501	-0.150407
201515	61.278	1.0049	-0.0073		32.2318	10.0591	-0.148374
201715	61.364	1.0058	-0.0073		32.277	10.0681	-0.148374
201916	61.448	1.0069	-0.0071		32.3212	10.0791	-0.144309
202116	61.53	1.0079	-0.007		32.3643	10.0891	-0.142276
202317	61.614	1.0089	-0.007		32.4085	10.0991	-0.142276
202517	61.694	1.0098	-0.007		32.4506	10.1081	-0.142276
202717	61.78	1.0108	-0.0068		32.4958	10.1181	-0.138211
202919	61.86	1.0118	-0.0067		32.5379	10.1281	-0.136179
203120	61.948	1.0127	-0.0067		32.5842	10.1371	-0.136179
203321	62.036	1.0137	-0.0065		32.6305	10.1471	-0.132114
203521	62.118	1.0147	-0.0065		32.6736	10.1572	-0.132114
203721	62.206	1.0156	-0.0064		32.7199	10.1662	-0.130081
203921	62.3	1.0167	-0.0062		32.7694	10.1772	-0.126016
204122	62.386	1.0177	-0.006		32.8146	10.1872	-0.121951
204323	62.48	1.0187	-0.0059		32.864	10.1972	-0.119919
204523	62.572	1.0196	-0.006		32.9124	10.2062	-0.121951
204723	62.672	1.0209	-0.0059		32.965	10.2192	-0.119919
204923	62.766	1.0219	-0.006		33.0145	10.2292	-0.121951
205124	62.856	1.023	-0.0057		33.0618	10.2402	-0.115854
205324	62.942	1.0239	-0.0057		33.107	10.2492	-0.115854
205525	63.028	1.0249	-0.0057		33.1523	10.2593	-0.115854
205725	63.112	1.026	-0.0056		33.1965	10.2703	-0.113821
205925	63.196	1.0268	-0.0056		33.2406	10.2783	-0.113821
206127	63.284	1.0281	-0.0054		33.2869	10.2913	-0.109756
206328	63.362	1.0289	-0.0053		33.328	10.2993	-0.107724
206529	63.446	1.03	-0.005		33.3721	10.3103	-0.101626
206729	63.526	1.031	-0.005		33.4142	10.3203	-0.101626
206929	63.606	1.032	-0.0049		33.4563	10.3303	-0.0995935
207129	63.688	1.0329	-0.0048		33.4994	10.3393	-0.097561
207330	63.774	1.0337	-0.0048		33.5447	10.3473	-0.097561
207531	63.86	1.0347	-0.0047		33.5899	10.3574	-0.0955285
207731	63.944	1.0358	-0.0045		33.6341	10.3684	-0.0914634
207931	64.03	1.0367	-0.0048		33.6793	10.3774	-0.097561
208131	64.114	1.0377	-0.0046		33.7235	10.3874	-0.0934959
208332	64.202	1.0388	-0.0045		33.7698	10.3984	-0.0914634
208532	64.292	1.0399	-0.0045		33.8171	10.4094	-0.0914634
208733	64.372	1.0408	-0.0042		33.8592	10.4184	-0.0853659
208933	64.48	1.0418	-0.0043		33.916	10.4284	-0.0873984
209133	64.582	1.0429	-0.0042		33.9697	10.4394	-0.0853659
209335	64.682	1.044	-0.0041		34.0223	10.4505	-0.0833333
209536	64.774	1.0451	-0.004		34.0707	10.4615	-0.0813008
209737	64.864	1.0461	-0.0039		34.118	10.4715	-0.0792683
209937	64.95	1.0472	-0.0038		34.1632	10.4825	-0.0772358
210137	65.032	1.048	-0.0037		34.2064	10.4905	-0.0752033
210337	65.116	1.049	-0.0037		34.2506	10.5005	-0.0752033
210538	65.2	1.05	-0.0036		34.2947	10.5105	-0.0731707
210739	65.282	1.0511	-0.0034		34.3379	10.5215	-0.0691057
210939	65.364	1.052	-0.0034		34.381	10.5305	-0.0691057
211139	65.446	1.0531	-0.0033		34.4241	10.5415	-0.0670732
211339	65.532	1.054	-0.0031		34.4694	10.5506	-0.0630081
211540	65.616	1.055	-0.0032		34.5136	10.5606	-0.0650407
211740	65.702	1.0559	-0.0031		34.5588	10.5696	-0.0630081
211941	65.782	1.057	-0.0029		34.6009	10.5806	-0.0589431
212141	65.866	1.0579	-0.0027		34.6451	10.5896	-0.054878
212341	65.946	1.0589	-0.0027		34.6871	10.5996	-0.054878
212543	66.034	1.0599	-0.0027		34.7334	10.6096	-0.054878
212744	66.126	1.061	-0.0025		34.7818	10.6206	-0.050813
212945	66.216	1.062	-0.0026		34.8291	10.6306	-0.0528455
213145	66.302	1.0629	-0.0024		34.8744	10.6396	-0.0487805
213345	66.388	1.064	-0.0024		34.9196	10.6507	-0.0487805
213545	66.472	1.065	-0.0022		34.9638	10.6607	-0.0447154
213746	66.552	1.0659	-0.0022		35.0059	10.6697	-0.0447154
213947	66.634	1.067	-0.0021		35.049	10.6807	-0.0426829
214147	66.716	1.0679	-0.002		35.0921	10.6897	-0.0406504
214347	66.796	1.069	-0.0019		35.1342	10.7007	-0.0386179
214547	66.878	1.0698	-0.0018		35.1774	10.7087	-0.0365854
214748	66.958	1.0709	-0.0017		35.2194	10.7197	-0.0345528
214948	67.044	1.0719	-0.0017		35.2647	10.7297	-0.0345528
215149	67.128	1.0729	-0.0015		35.3089	10.7397	-0.0304878
215349	67.214	1.0737	-0.0014		35.3541	10.7477	-0.0284553
215549	67.294	1.0747	-0.0013		35.3962	10.7578	-0.0264228
215750	67.376	1.0759	-0.0012		35.4393	10.7698	-0.0243902
215950	67.456	1.0768	-0.0012		35.4814	10.7788	-0.0243902
216151	67.534	1.0777	-0.001		35.5224	10.7878	-0.0203252
216351	67.614	1.0787	-0.0011		35.5645	10.7978	-0.0223577
216551	67.702	1.0797	-0.0008		35.6108	10.8078	-0.0162602
216753	67.794	1.0807	-0.0008		35.6592	10.8178	-0.0162602
216954	67.89	1.0819	-0.0006		35.7097	10.8298	-0.0121951
217155	67.984	1.0829	-0.0005		35.7591	10.8398	-0.0101626
217355	68.07	1.084	-0.0005		35.8043	10.8509	-0.0101626
217555	68.154	1.0849	-0.0005		35.8485	10.8599	-0.0101626
217755	68.24	1.086	-0.0002		35.8938	10.8709	-0.00406504
217956	68.324	1.087	-0.0001		35.9379	10.8809	-0.00203252
218157	68.408	1.0879	0		35.9821	10.8899	0
218357	68.484	1.0889	0.0001		36.0221	10.8999	0.00203252
218557	68.564	1.0899	0.0002		36.0642	10.9099	0.00406504
218757	68.642	1.0909	0.0003		36.1052	10.9199	0.00609756
218958	68.722	1.0918	0.0004		36.1473	10.9289	0.00813008
219158	68.802	1.0927	0.0005		36.1894	10.9379	0.0101626
219359	68.898	1.0938	0.0005		36.2399	10.9489	0.0101626
219559	68.99	1.0951	0.0006		36.2883	10.962	0.0121951
219759	69.074	1.0961	0.0007		36.3324	10.972	0.0142276
219961	69.162	1.0972	0.0008		36.3787	10.983	0.0162602
220162	69.244	1.0983	0.001		36.4219	10.994	0.0203252
220363	69.324	1.0993	0.001		36.4639	11.004	0.0203252
220563	69.4	1.1	0.0011		36.5039	11.011	0.0223577
220763	69.48	1.101	0.0012		36.546	11.021	0.0243902
220963	69.556	1.102	0.0013		36.586	11.031	0.0264228
221164	69.634	1.103	0.0013		36.627	11.041	0.0264228
221365	69.714	1.1039	0.0014		36.6691	11.0501	0.0284553
221565	69.792	1.1049	0.0016		36.7101	11.0601	0.0325203
221765	69.87	1.1059	0.0016		36.7511	11.0701	0.0325203
221965	69.944	1.1069	0.0015		36.7901	11.0801	0.0304878
222166	70.026	1.1078	0.0015		36.8332	11.0891	0.0304878
222366	70.102	1.1089	0.0017		36.8732	11.1001	0.0345528
222567	70.176	1.1099	0.0019		36.9121	11.1101	0.0386179
222767	70.26	1.111	0.0019		36.9563	11.1211	0.0386179
222967	70.344	1.1119	0.0022		37.0004	11.1301	0.0447154
223169	70.426	1.113	0.0022		37.0436	11.1411	0.0447154
223370	70.5	1.1141	0.0022		37.0825	11.1522	0.0447154
223571	70.58	1.1149	0.0024		37.1246	11.1602	0.0487805
223771	70.656	1.1158	0.0025		37.1646	11.1692	0.050813
223971	70.748	1.1168	0.0026		37.2129	11.1792	0.0528455
224171	70.838	1.118	0.0027		37.2603	11.1912	0.054878
224372	70.922	1.119	0.0028		37.3045	11.2012	0.0569106
224573	71.01	1.12	0.0029		37.3508	11.2112	0.0589431
224773	71.09	1.1211	0.003		37.3928	11.2222	0.0609756
224973	71.17	1.1221	0.0031		37.4349	11.2322	0.0630081
225173	71.248	1.1232	0.0032		37.4759	11.2432	0.0650407
225374	71.328	1.124	0.0032		37.518	11.2513	0.0650407
225574	71.404	1.1249	0.0033		37.558	11.2603	0.0670732
225775	71.486	1.126	0.0034		37.6011	11.2713	0.0691057
225975	71.564	1.127	0.0035		37.6422	11.2813	0.0711382
226175	71.644	1.1281	0.0036		37.6842	11.2923	0.0731707
226377	71.718	1.129	0.0037		37.7232	11.3013	0.0752033
226578	71.796	1.1299	0.0036		37.7642	11.3103	0.0731707
226779	71.876	1.1309	0.0038		37.8063	11.3203	0.0772358
226979	71.952	1.1319	0.0037		37.8462	11.3303	0.0752033
227179	72.03	1.1329	0.0039		37.8873	11.3403	0.0792683
227379	72.106	1.1339	0.004		37.9272	11.3504	0.0813008
227580	72.182	1.1348	0.004		37.9672	11.3594	0.0813008
227781	72.27	1.1359	0.0042		38.0135	11.3704	0.0853659
227981	72.356	1.1369	0.0042		38.0587	11.3804	0.0853659
228181	72.44	1.1379	0.0044		38.1029	11.3904	0.0894309
228381	72.524	1.1389	0.0044		38.1471	11.4004	0.0894309
228582	72.61	1.14	0.0046		38.1923	11.4114	0.0934959
228782	72.696	1.141	0.0046		38.2376	11.4214	0.0934959
228983	72.782	1.1421	0.0048		38.2828	11.4324	0.097561
229183	72.864	1.1432	0.0051		38.3259	11.4434	0.103659
229383	72.94	1.144	0.0049		38.3659	11.4515	0.0995935
229585	73.018	1.145	0.005		38.407	11.4615	0.101626
229786	73.094	1.1462	0.0052		38.4469	11.4735	0.105691
229987	73.17	1.147	0.0053		38.4869	11.4815	0.107724
230187	73.25	1.148	0.0054		38.529	11.4915	0.109756
230387	73.326	1.1491	0.0055		38.569	11.5025	0.111789
230587	73.402	1.1499	0.0055		38.6089	11.5105	0.111789
230788	73.48	1.151	0.0056		38.65	11.5215	0.113821
230989	73.564	1.1521	0.0058		38.6941	11.5325	0.117886
231189	73.65	1.1532	0.0058		38.7394	11.5435	0.117886
231389	73.734	1.1542	0.0059		38.7836	11.5536	0.119919
231589	73.816	1.1552	0.006		38.8267	11.5636	0.121951
231790	73.894	1.1561	0.006		38.8677	11.5726	0.121951
231990	73.974	1.1572	0.0062		38.9098	11.5836	0.126016
232191	74.054	1.1582	0.0128		38.9519	11.5936	0.260163
232391	74.13	1.1593	0.0129		38.9919	11.6046	0.262195
232591	74.204	1.1603	0.0129		39.0308	11.6146	0.262195
232793	74.274	1.1615	0.0129		39.0676	11.6266	0.262195
232994	74.346	1.1625	0.0129		39.1055	11.6366	0.262195
233195	74.414	1.1633	0.0129		39.1412	11.6446	0.262195
233395	74.486	1.1642	0.0131		39.1791	11.6537	0.26626
233595	74.552	1.1651	0.0131		39.2138	11.6627	0.26626
233795	74.622	1.1661	0.0132		39.2506	11.6727	0.268293
233996	74.696	1.167	0.0133		39.2896	11.6817	0.270325
234197	74.768	1.168	0.0133		39.3274	11.6917	0.270325
234397	74.844	1.169	0.0134		39.3674	11.7017	0.272358
234597	74.916	1.17	0.0134		39.4053	11.7117	0.272358
234797	74.988	1.171	0.0134		39.4432	11.7217	0.272358
234998	75.07	1.1719	0.0136		39.4863	11.7307	0.276423
235198	75.148	1.1729	0.0136		39.5273	11.7407	0.276423
235399	75.224	1.1739	0.0137		39.5673	11.7508	0.278455
235599	75.302	1.175	0.0137		39.6083	11.7618	0.278455
235799	75.374	1.1759	0.0138		39.6462	11.7708	0.280488
236000	75.456	1.177	0.0138		39.6893	11.7818	0.280488
236200	75.536	1.178	0.0139		39.7314	11.7918	0.28252
236401	75.614	1.179	0.014		39.7724	11.8018	0.284553
236601	75.692	1.1799	0.014		39.8135	11.8108	0.284553
236801	75.776	1.181	0.014		39.8576	11.8218	0.284553
237003	75.854	1.1819	0.014		39.8987	11.8308	0.284553
237204	75.93	1.183	0.0141		39.9386	11.8418	0.286585
237405	76.008	1.1841	0.0143		39.9797	11.8529	0.29065
237605	76.084	1.185	0.0145		40.0196	11.8619	0.294715
237805	76.162	1.1861	0.0146		40.0607	11.8729	0.296748
238005	76.24	1.1871	0.0144		40.1017	11.8829	0.292683
238206	76.312	1.188	0.0147		40.1396	11.8919	0.29878
238407	76.394	1.1891	0.0145		40.1827	11.9029	0.294715
238607	76.47	1.1901	0.0147		40.2227	11.9129	0.29878
238807	76.548	1.1912	0.0147		40.2637	11.9239	0.29878
239007	76.622	1.192	0.0147		40.3026	11.9319	0.29878
239208	76.692	1.193	0.0148		40.3395	11.9419	0.300813
239408	76.764	1.1941	0.0148		40.3773	11.953	0.300813
239609	76.838	1.195	0.0149		40.4162	11.962	0.302846
239809	76.908	1.1959	0.0151		40.4531	11.971	0.306911
240009	76.978	1.1969	0.0152		40.4899	11.981	0.308943
240211	77.056	1.198	0.0152		40.5309	11.992	0.308943
240412	77.13	1.1989	0.0151		40.5698	12.001	0.306911
240613	77.218	1.2	0.0152		40.6161	12.012	0.308943
240813	77.31	1.2012	0.0152		40.6645	12.024	0.308943
241013	77.4	1.2023	0.0153		40.7119	12.035	0.310976
241213	77.486	1.2035	0.0157		40.7571	12.047	0.319106
241414	77.568	1.2042	0.0155		40.8002	12.0541	0.315041
241615	77.65	1.2053	0.0155		40.8434	12.0651	0.315041
241815	77.726	1.2065	0.0156		40.8833	12.0771	0.317073
242015	77.8	1.2075	0.0156		40.9223	12.0871	0.317073
242215	77.872	1.2084	0.0157		40.9601	12.0961	0.319106
242416	77.946	1.2093	0.0158		40.999	12.1051	0.321138
242616	78.014	1.2104	0.0158		41.0348	12.1161	0.321138
242817	78.082	1.2114	0.0159		41.0706	12.1261	0.323171
243017	78.15	1.2121	0.016		41.1063	12.1331	0.325203
243217	78.224	1.2133	0.0161		41.1453	12.1451	0.327236
243419	78.292	1.2142	0.0161		41.181	12.1542	0.327236
243620	78.362	1.2153	0.0162		41.2179	12.1652	0.329268
243821	78.432	1.2162	0.0162		41.2547	12.1742	0.329268
244021	78.5	1.2173	0.0162		41.2904	12.1852	0.329268
244221	78.566	1.218	0.0163		41.3252	12.1922	0.331301
244421	78.636	1.2192	0.0165		41.362	12.2042	0.335366
244622	78.71	1.2202	0.0164		41.4009	12.2142	0.333333
244823	78.774	1.2211	0.0165		41.4346	12.2232	0.335366
245023	78.846	1.222	0.0167		41.4724	12.2322	0.339431
245223	78.916	1.223	0.0167		41.5093	12.2422	0.339431
245423	78.986	1.2239	0.0168		41.5461	12.2513	0.341463
245624	79.052	1.225	0.0168		41.5808	12.2623	0.341463
245824	79.122	1.2259	0.0169		41.6176	12.2713	0.343496
246025	79.194	1.227	0.0169		41.6555	12.2823	0.343496
246225	79.262	1.228	0.0169		41.6913	12.2923	0.343496
246425	79.328	1.229	0.017		41.726	12.3023	0.345528
246627	79.398	1.2298	0.0171		41.7628	12.3103	0.347561
246828	79.47	1.2308	0.0171		41.8007	12.3203	0.347561
247029	79.558	1.232	0.0172		41.8469	12.3323	0.349593
247229	79.642	1.233	0.0173		41.8911	12.3423	0.351626
247429	79.73	1.2342	0.0173		41.9374	12.3544	0.351626
247629	79.808	1.2352	0.0174		41.9784	12.3644	0.353659
247830	79.89	1.2363	0.0175		42.0216	12.3754	0.355691
248031	79.964	1.2373	0.0175		42.0605	12.3854	0.355691
248231	80.038	1.2383	0.0176		42.0994	12.3954	0.357724
248431	80.112	1.2393	0.0177		42.1383	12.4054	0.359756
248631	80.18	1.2403	0.0178		42.1741	12.4154	0.361789
248832	80.256	1.2412	0.0179		42.2141	12.4244	0.363821
249032	80.326	1.2423	0.018		42.2509	12.4354	0.365854
249233	80.392	1.2433	0.018		42.2856	12.4454	0.365854
249433	80.462	1.2443	0.018		42.3224	12.4555	0.365854
249633	80.53	1.2452	0.0181		42.3582	12.4645	0.367886
249835	80.596	1.2462	0.0182		42.3929	12.4745	0.369919
250036	80.66	1.2472	0.0182		42.4266	12.4845	0.369919
250237	80.738	1.2481	0.0183		42.4676	12.4935	0.371951
250437	80.806	1.2491	0.0183		42.5034	12.5035	0.371951
250637	80.878	1.2501	0.0184		42.5413	12.5135	0.373984
250837	80.944	1.2511	0.0186		42.576	12.5235	0.378049
251038	81.016	1.2521	0.0186		42.6138	12.5335	0.378049
251239	81.082	1.253	0.0186		42.6486	12.5425	0.378049
251439	81.15	1.254	0.0187		42.6843	12.5526	0.380081
251639	81.216	1.2551	0.0187		42.719	12.5636	0.380081
251839	81.288	1.2559	0.0189		42.7569	12.5716	0.384146
252040	81.358	1.2569	0.0189		42.7937	12.5816	0.384146
252240	81.438	1.258	0.019		42.8358	12.5926	0.386179
252441	81.514	1.2592	0.0191		42.8758	12.6046	0.388211
252641	81.588	1.26	0.0191		42.9147	12.6126	0.388211
252841	81.662	1.2612	0.0192		42.9536	12.6246	0.390244
253043	81.736	1.2622	0.0193		42.9926	12.6346	0.392276
253244	81.806	1.2633	0.0194		43.0294	12.6456	0.394309
253445	81.876	1.2642	0.0194		43.0662	12.6547	0.394309
253645	81.946	1.2652	0.0195		43.103	12.6647	0.396341
253845	82.016	1.2661	0.0195		43.1398	12.6737	0.396341
254045	82.09	1.2673	0.0196		43.1788	12.6857	0.398374
254246	82.16	1.2682	0.0197		43.2156	12.6947	0.400407
254447	82.232	1.2692	0.0198		43.2535	12.7047	0.402439
254647	82.3	1.2703	0.0199		43.2892	12.7157	0.404472
254847	82.368	1.2712	0.02		43.325	12.7247	0.406504
255047	82.434	1.2723	0.0202		43.3597	12.7357	0.410569
255248	82.502	1.2732	0.0203		43.3955	12.7447	0.412602
255448	82.576	1.2743	0.0205		43.4344	12.7558	0.416667
255649	82.65	1.2752	0.0205		43.4733	12.7648	0.416667
255849	82.72	1.2762	0.0207		43.5101	12.7748	0.420732
256049	82.788	1.2773	0.021		43.5459	12.7858	0.426829
256250	82.85	1.2783	0.0212		43.5785	12.7958	0.430894
256450	82.914	1.2793	0.0211		43.6122	12.8058	0.428862
256651	82.978	1.2803	0.0214		43.6458	12.8158	0.434959
256851	83.044	1.2812	0.0213		43.6806	12.8248	0.432927
257051	83.106	1.2823	0.0216		43.7132	12.8358	0.439024
257253	83.172	1.283	0.0217		43.7479	12.8428	0.441057
257454	83.242	1.2841	0.0218		43.7847	12.8539	0.443089
257655	83.31	1.2851	0.0218		43.8205	12.8639	0.443089
257855	83.382	1.2862	0.0219		43.8583	12.8749	0.445122
258055	83.454	1.2871	0.0219		43.8962	12.8839	0.445122
258255	83.52	1.2882	0.0222		43.9309	12.8949	0.45122
258456	83.588	1.2892	0.0224		43.9667	12.9049	0.455285
258657	83.654	1.2902	0.0225		44.0014	12.9149	0.457317
258857	83.722	1.2912	0.0225		44.0372	12.9249	0.457317
259057	83.786	1.2922	0.0227		44.0708	12.9349	0.461382
259257	83.86	1.2931	0.0228		44.1098	12.9439	0.463415
259458	83.928	1.2941	0.0229		44.1455	12.954	0.465447
259658	84.002	1.2953	0.0228		44.1845	12.966	0.463415
259859	84.07	1.2963	0.023		44.2202	12.976	0.46748
260059	84.138	1.2973	0.0231		44.256	12.986	0.469512
260259	84.202	1.2982	0.0231		44.2897	12.995	0.469512
260461	84.268	1.2994	0.0233		44.3244	13.007	0.473577
260662	84.336	1.3003	0.0235		44.3601	13.016	0.477642
260863	84.398	1.3011	0.0237		44.3928	13.024	0.481707
261063	84.462	1.3022	0.0237		44.4264	13.035	0.481707
261263	84.524	1.3031	0.0237		44.459	13.044	0.481707
261463	84.59	1.3042	0.0239		44.4937	13.0551	0.485772
261664	84.648	1.3052	0.0239		44.5243	13.0651	0.485772
261865	84.712	1.3061	0.0241		44.5579	13.0741	0.489837
262065	84.774	1.307	0.0242		44.5905	13.0831	0.49187
262265	84.838	1.3081	0.0244		44.6242	13.0941	0.495935
262465	84.902	1.3091	0.0244		44.6579	13.1041	0.495935
262666	84.976	1.3102	0.0246		44.6968	13.1151	0.5
262866	85.052	1.3112	0.0248		44.7368	13.1251	0.504065
263067	85.136	1.3122	0.025		44.7809	13.1351	0.50813
263267	85.216	1.3133	0.0249		44.823	13.1461	0.506098
263467	85.286	1.3144	0.0252		44.8598	13.1572	0.512195
263669	85.358	1.3153	0.0253		44.8977	13.1662	0.514228
263870	85.428	1.3165	0.0253		44.9345	13.1782	0.514228
264071	85.494	1.3174	0.0255		44.9692	13.1872	0.518293
264271	85.558	1.3185	0.0255		45.0029	13.1982	0.518293
264471	85.622	1.3195	0.0258		45.0366	13.2082	0.52439
264671	85.686	1.3203	0.0259		45.0702	13.2162	0.526423
264872	85.752	1.3213	0.026		45.1049	13.2262	0.528455
265073	85.816	1.3224	0.0262		45.1386	13.2372	0.53252
265273	85.878	1.3233	0.0262		45.1712	13.2462	0.53252
265473	85.94	1.3243	0.0264		45.2038	13.2563	0.536585
265673	86.002	1.3253	0.0262		45.2364	13.2663	0.53252
265874	86.06	1.3262	0.0264		45.267	13.2753	0.536585
266074	86.12	1.3273	0.0266		45.2985	13.2863	0.54065
266275	86.182	1.3283	0.0268		45.3311	13.2963	0.544715
266475	86.246	1.3292	0.0269		45.3648	13.3053	0.546748
266675	86.314	1.3302	0.0269		45.4006	13.3153	0.546748
266877	86.38	1.3311	0.027		45.4353	13.3243	0.54878
267078	86.442	1.3321	0.026		45.4679	13.3343	0.528455
267279	86.512	1.3331	0.026		45.5047	13.3443	0.528455
267479	86.586	1.3341	0.026		45.5436	13.3544	0.528455
267679	86.656	1.3352	0.0259		45.5804	13.3654	0.526423
267879	86.726	1.3362	0.026		45.6173	13.3754	0.528455
268080	86.79	1.3373	0.026		45.6509	13.3864	0.528455
268281	86.85	1.3383	0.026		45.6825	13.3964	0.528455
268481	86.912	1.3392	0.0261		45.7151	13.4054	0.530488
268681	86.97	1.3403	0.0262		45.7456	13.4164	0.53252
268881	87.03	1.3412	0.0263		45.7772	13.4254	0.534553
269082	87.09	1.3423	0.0264		45.8087	13.4364	0.536585
269282	87.15	1.3433	0.0266		45.8403	13.4464	0.54065
269483	87.214	1.3442	0.0265		45.8739	13.4555	0.538618
269683	87.274	1.3453	0.0267		45.9055	13.4665	0.542683
269883	87.334	1.3462	0.0268		45.9371	13.4755	0.544715
270085	87.394	1.3473	0.0271		45.9686	13.4865	0.550813
270286	87.454	1.3482	0.0271		46.0002	13.4955	0.550813
270487	87.508	1.349	0.0274		46.0286	13.5035	0.556911
270687	87.572	1.3501	0.0276		46.0623	13.5145	0.560976
270887	87.636	1.3512	0.0275		46.0959	13.5255	0.558943
271087	87.706	1.3522	0.0277		46.1327	13.5355	0.563008
271288	87.774	1.3533	0.0278		46.1685	13.5465	0.565041
271435	86.684	1.3546	0.0284		45.5952	13.5596	0.577236
271439	85.374	1.3562	0.0291		44.9061	13.5756	0.591463
271441	83.764	1.3577	0.0298		44.0593	13.5906	0.605691
271443	66.944	1.3634	0.0314		35.2121	13.6476	0.638211
271445	31.61	1.3634	0.0314		16.6266	13.6476	0.638211
271447	8.516	1.3634	0.0314		4.47936	13.6476	0.638211
271448	4.672	1.3634	0.0314		2.45744	13.6476	0.638211
