# Supplementary material for: Physical and Mechanical Properties of Gypsum‐Like Rock Materials
Source: Hindawi journal article supplement (doi:10.1155/2020/3703706), 2020-01-01
Supplement: f1 [file 3703706.f1.zip › 3703706.f1/Original triaxial compression test data.xlsx]

## Sheet: ZC-5-3
Time: 10:24:38,06/22/2019
diameter: 49.1	mm	height: 100.2	mm
Vertical 100kN force sensor (vertical force of test piece)
Control mode: force / confining pressure	waveform: slope
KN/s	Force end point: 5.780	KN	confining pressure rate: 0.500	MPa/s	confining pressure end point:3.0210	MPa
time (ms)	vertical force (KN)	vertical deformation (mm)	confining pressure (MPa)		Stress (MPa)	axial strain	transverse strain
0	0	0	0		0	0	0
200	0	-0.0001	0.031		0	-0.000998004	0.631365
400	0	0	0.031		0	0	0.631365
600	0.14	-5e-05	0.039		0.0739393	-0.000499002	0.794297
800	0.44	-0.00015	0.05		0.232381	-0.00149701	1.01833
1000	0.64	-0.00022	0.061		0.338008	-0.00219561	1.24236
1200	0.78	0.00013	0.077		0.411947	0.00129741	1.56823
1400	0.98	0.00086	0.1		0.517575	0.00858283	2.03666
1600	1.12	0.00221	0.138		0.591514	0.0220559	2.81059
1800	1.5	0.00578	0.179		0.792206	0.0576846	3.64562
2000	1.68	0.00911	0.227		0.887271	0.0909182	4.62322
2200	1.88	0.01244	0.277		0.992899	0.124152	5.64155
2400	2.04	0.01599	0.32		1.0774	0.159581	6.51731
2600	2.36	0.01957	0.365		1.2464	0.195309	7.43381
2800	2.56	0.0235	0.41		1.35203	0.234531	8.35031
3000	2.7	0.02716	0.464		1.42597	0.271058	9.4501
3200	2.94	0.03087	0.524		1.55272	0.308084	10.6721
3400	3.12	0.03401	0.594		1.64779	0.339421	12.0978
3600	3.38	0.03592	0.723		1.78511	0.358483	14.7251
3800	3.66	0.03612	1.088		1.93298	0.360479	22.1589
4000	3.84	0.03596	1.653		2.02805	0.358882	33.666
4200	3.86	0.03595	1.782		2.03861	0.358782	36.2933
4400	4	0.0359	2.087		2.11255	0.358283	42.5051
4600	4.24	0.03562	2.298		2.2393	0.355489	46.8024
4800	4.34	0.03568	2.348		2.29212	0.356088	47.8208
5000	4.6	0.03549	2.443		2.42943	0.354192	49.7556
5200	4.88	0.03559	2.549		2.57731	0.35519	51.9145
5400	5.18	0.03569	2.646		2.73575	0.356188	53.89
5600	5.44	0.0369	2.755		2.87307	0.368263	56.11
5800	5.66	0.03912	2.852		2.98926	0.390419	58.0855
6000	5.64	0.04093	2.945		2.9787	0.408483	59.9796
6200	5.78	0.04238	3.021		3.05264	0.422954	61.5275
控制模式:围压	波形:斜坡
MPa/s	终点:3.0120	MPa
时间(ms)	垂直力(KN)	垂直变形(mm)	围压(MPa)
6372	5.98	0.04461	3.012		3.15826	0.44521	61.3442
控制模式:位移	波形:斜坡
mm/s	终点:1.1960	mm
时间(ms)	垂直力(KN)	垂直变形(mm)	围压(MPa)
6403	5.94	0.04482	3.001		3.13714	0.447305	61.1202
6603	5.94	0.04482	3.001		3.13714	0.447305	61.1202
6803	4.64	0.04618	2.982		2.45056	0.460878	60.7332
7004	4.92	0.04898	2.981		2.59844	0.488822	60.7128
7204	4.92	0.04898	2.981		2.59844	0.488822	60.7128
7406	4.92	0.04898	2.981		2.59844	0.488822	60.7128
7607	3.86	0.05225	2.98		2.03861	0.521457	60.6925
7807	3.86	0.05225	2.98		2.03861	0.521457	60.6925
8008	3.86	0.05225	2.98		2.03861	0.521457	60.6925
8208	3.86	0.05225	2.98		2.03861	0.521457	60.6925
8408	3.46	0.05539	2.979		1.82736	0.552794	60.6721
8609	3.46	0.05539	2.979		1.82736	0.552794	60.6721
8809	3.46	0.05539	2.979		1.82736	0.552794	60.6721
9009	3.5	0.05838	2.979		1.84848	0.582635	60.6721
9210	5.72	0.0577	2.976		3.02095	0.575848	60.611
9410	5.98	0.06081	2.973		3.15826	0.606886	60.5499
9611	5.98	0.06081	2.973		3.15826	0.606886	60.5499
9811	5.98	0.06081	2.973		3.15826	0.606886	60.5499
10011	5.98	0.06081	2.973		3.15826	0.606886	60.5499
10212	3.64	0.06523	2.982		1.92242	0.650998	60.7332
10412	3.38	0.06512	2.982		1.78511	0.6499	60.7332
10614	6.12	0.06436	2.981		3.2322	0.642315	60.7128
10815	6.12	0.06436	2.981		3.2322	0.642315	60.7128
11015	6.12	0.06436	2.981		3.2322	0.642315	60.7128
11216	6.08	0.06777	2.98		3.21108	0.676347	60.6925
11416	6.08	0.06777	2.98		3.21108	0.676347	60.6925
11616	6.08	0.06777	2.98		3.21108	0.676347	60.6925
11817	6.4	0.07056	2.98		3.38008	0.704192	60.6925
12017	6.12	0.07356	2.981		3.2322	0.734132	60.7128
12217	6.12	0.07356	2.981		3.2322	0.734132	60.7128
12418	7	0.07325	2.982		3.69696	0.731038	60.7332
12618	6.82	0.07631	2.981		3.6019	0.761577	60.7128
12819	6.82	0.07631	2.981		3.6019	0.761577	60.7128
13019	6.82	0.07631	2.981		3.6019	0.761577	60.7128
13219	5.78	0.07918	2.98		3.05264	0.79022	60.6925
13420	5.72	0.0792	2.984		3.02095	0.790419	60.7739
13620	5.72	0.0792	2.984		3.02095	0.790419	60.7739
13822	5.38	0.08172	2.983		2.84138	0.815569	60.7536
14023	5.38	0.08172	2.983		2.84138	0.815569	60.7536
14223	6.1	0.08417	2.983		3.22164	0.84002	60.7536
14424	6.38	0.08397	2.981		3.36952	0.838024	60.7128
14624	6.38	0.08397	2.981		3.36952	0.838024	60.7128
14824	6.38	0.08397	2.981		3.36952	0.838024	60.7128
15025	6.38	0.08397	2.981		3.36952	0.838024	60.7128
15225	6.28	0.089	2.981		3.3167	0.888224	60.7128
15425	6.6	0.08879	2.982		3.48571	0.886128	60.7332
15626	6.6	0.08879	2.982		3.48571	0.886128	60.7332
15826	6.34	0.09118	2.983		3.34839	0.90998	60.7536
16027	6.34	0.09118	2.983		3.34839	0.90998	60.7536
16227	6.56	0.0933	2.979		3.46458	0.931138	60.6721
16427	6.56	0.0933	2.979		3.46458	0.931138	60.6721
16628	7.04	0.09564	2.984		3.71809	0.954491	60.7739
16828	7.48	0.09538	2.98		3.95047	0.951896	60.6925
17030	7.48	0.09538	2.98		3.95047	0.951896	60.6925
17231	7.1	0.09792	2.983		3.74978	0.977246	60.7536
17431	7.1	0.09792	2.983		3.74978	0.977246	60.7536
17632	6.76	0.10033	2.983		3.57021	1.0013	60.7536
17832	6.76	0.10033	2.983		3.57021	1.0013	60.7536
18032	7.8	0.10227	2.983		4.11947	1.02066	60.7536
18233	8.56	0.102	2.986		4.52086	1.01796	60.8147
18433	8.2	0.10433	2.982		4.33073	1.04122	60.7332
18633	8.2	0.10433	2.982		4.33073	1.04122	60.7332
18834	8.2	0.10433	2.982		4.33073	1.04122	60.7332
19034	8.2	0.10433	2.982		4.33073	1.04122	60.7332
19235	8.2	0.10433	2.982		4.33073	1.04122	60.7332
19435	8.44	0.10895	2.982		4.45748	1.08733	60.7332
19635	8.44	0.10895	2.982		4.45748	1.08733	60.7332
19836	8.64	0.11108	2.982		4.56311	1.10858	60.7332
20036	8.48	0.11113	2.982		4.47861	1.10908	60.7332
20238	8.48	0.11113	2.982		4.47861	1.10908	60.7332
20439	8.48	0.11113	2.982		4.47861	1.10908	60.7332
20639	8.48	0.11113	2.982		4.47861	1.10908	60.7332
20840	8.2	0.11613	2.982		4.33073	1.15898	60.7332
21040	9.8	0.11567	2.982		5.17575	1.15439	60.7332
21240	10.12	0.11776	2.983		5.34475	1.17525	60.7536
21441	10.12	0.11776	2.983		5.34475	1.17525	60.7536
21641	10.62	0.11968	2.984		5.60882	1.19441	60.7739
21841	10.62	0.11968	2.984		5.60882	1.19441	60.7739
22042	10.62	0.11968	2.984		5.60882	1.19441	60.7739
22242	10.62	0.11968	2.984		5.60882	1.19441	60.7739
22443	10.62	0.11968	2.984		5.60882	1.19441	60.7739
22643	10.62	0.11968	2.984		5.60882	1.19441	60.7739
22843	10.62	0.11968	2.984		5.60882	1.19441	60.7739
23044	10.14	0.12625	2.98		5.35532	1.25998	60.6925
23244	10.14	0.12625	2.98		5.35532	1.25998	60.6925
23446	9.88	0.12854	2.981		5.218	1.28283	60.7128
23647	10.9	0.12819	2.983		5.7567	1.27934	60.7536
23847	10.82	0.13051	2.981		5.71445	1.3025	60.7128
24048	10.44	0.13045	2.984		5.51376	1.3019	60.7739
24248	10.44	0.13045	2.984		5.51376	1.3019	60.7739
24448	10.02	0.13299	2.984		5.29194	1.32725	60.7739
24649	10.02	0.13299	2.984		5.29194	1.32725	60.7739
24849	9.9	0.13534	2.981		5.22856	1.3507	60.7128
25049	9.9	0.13534	2.981		5.22856	1.3507	60.7128
25250	10.5	0.13723	2.983		5.54545	1.36956	60.7536
25450	10.5	0.13723	2.983		5.54545	1.36956	60.7536
25651	10.92	0.13928	2.979		5.76726	1.39002	60.6721
25851	10.92	0.13928	2.979		5.76726	1.39002	60.6721
26051	11.44	0.1411	2.979		6.04189	1.40818	60.6721
26252	11.82	0.14106	2.981		6.24259	1.40778	60.7128
26452	11.82	0.14106	2.981		6.24259	1.40778	60.7128
26653	11.72	0.1432	2.984		6.18977	1.42914	60.7739
26853	11.72	0.1432	2.984		6.18977	1.42914	60.7739
27053	11.42	0.1453	2.982		6.03133	1.4501	60.7332
27254	11.42	0.1453	2.982		6.03133	1.4501	60.7332
27454	11.46	0.14749	2.98		6.05246	1.47196	60.6925
27656	11.46	0.14749	2.98		6.05246	1.47196	60.6925
27857	11.14	0.1498	2.984		5.88345	1.49501	60.7739
28057	11.14	0.1498	2.984		5.88345	1.49501	60.7739
28258	12.02	0.15169	2.981		6.34821	1.51387	60.7128
28458	12.02	0.15169	2.981		6.34821	1.51387	60.7128
28658	12.28	0.1536	2.982		6.48553	1.53293	60.7332
28859	12.28	0.1536	2.982		6.48553	1.53293	60.7332
29059	12.74	0.15544	2.983		6.72847	1.5513	60.7536
29259	12.74	0.15544	2.983		6.72847	1.5513	60.7536
29460	12.74	0.15774	2.983		6.72847	1.57425	60.7536
29660	13.08	0.15762	2.981		6.90804	1.57305	60.7128
29861	13.08	0.15762	2.981		6.90804	1.57305	60.7128
30061	13.22	0.15957	2.982		6.98198	1.59251	60.7332
30261	13.22	0.15957	2.982		6.98198	1.59251	60.7332
30462	13.3	0.16155	2.979		7.02423	1.61228	60.6721
30662	13.3	0.16155	2.979		7.02423	1.61228	60.6721
30864	13.72	0.1635	2.983		7.24605	1.63174	60.7536
31065	13.72	0.1635	2.983		7.24605	1.63174	60.7536
31265	13.72	0.1635	2.983		7.24605	1.63174	60.7536
31466	13.72	0.1635	2.983		7.24605	1.63174	60.7536
31666	13.72	0.1635	2.983		7.24605	1.63174	60.7536
31866	13.72	0.1635	2.983		7.24605	1.63174	60.7536
32067	13.42	0.17	2.984		7.08761	1.69661	60.7739
32267	13.42	0.17	2.984		7.08761	1.69661	60.7739
32467	13.68	0.17201	2.985		7.22492	1.71667	60.7943
32668	13.68	0.17201	2.985		7.22492	1.71667	60.7943
32868	13.78	0.17388	2.979		7.27774	1.73533	60.6721
33069	13.78	0.17388	2.979		7.27774	1.73533	60.6721
33269	14.04	0.17589	2.984		7.41505	1.75539	60.7739
33469	14.04	0.17589	2.984		7.41505	1.75539	60.7739
33670	14.18	0.17794	2.981		7.48899	1.77585	60.7128
33870	14.18	0.17794	2.981		7.48899	1.77585	60.7128
34072	14.74	0.17974	2.982		7.78475	1.79381	60.7332
34273	14.74	0.17974	2.982		7.78475	1.79381	60.7332
34473	14.94	0.18177	2.984		7.89038	1.81407	60.7739
34674	14.94	0.18177	2.984		7.89038	1.81407	60.7739
34874	14.86	0.1838	2.98		7.84813	1.83433	60.6925
35074	14.86	0.1838	2.98		7.84813	1.83433	60.6925
35275	15.3	0.18575	2.981		8.08051	1.85379	60.7128
35475	15.84	0.18566	2.983		8.3657	1.85289	60.7536
35675	15.46	0.18789	2.982		8.16501	1.87515	60.7332
35876	15.7	0.18771	2.984		8.29176	1.87335	60.7739
36076	15.92	0.18983	2.983		8.40795	1.89451	60.7536
36277	15.8	0.18977	2.984		8.34457	1.89391	60.7739
36477	16.14	0.19165	2.982		8.52414	1.91267	60.7332
36677	15.74	0.19179	2.985		8.31289	1.91407	60.7943
36878	15.74	0.19179	2.985		8.31289	1.91407	60.7943
37078	15.7	0.19381	2.985		8.29176	1.93423	60.7943
37280	15.7	0.19381	2.985		8.29176	1.93423	60.7943
37481	16.46	0.19564	2.984		8.69315	1.9525	60.7739
37681	16.8	0.19752	2.983		8.87271	1.97126	60.7536
37882	16.3	0.1977	2.983		8.60864	1.97305	60.7536
38082	16.3	0.1977	2.983		8.60864	1.97305	60.7536
38282	16.2	0.19963	2.983		8.55583	1.99232	60.7536
38483	16.2	0.19963	2.983		8.55583	1.99232	60.7536
38683	16.2	0.20183	2.982		8.55583	2.01427	60.7332
38883	16.2	0.20183	2.982		8.55583	2.01427	60.7332
39084	16.9	0.20349	2.983		8.92553	2.03084	60.7536
39284	16.9	0.20349	2.983		8.92553	2.03084	60.7536
39485	16.62	0.20558	2.985		8.77765	2.0517	60.7943
39685	16.62	0.20558	2.985		8.77765	2.0517	60.7943
39885	16.6	0.20769	2.981		8.76709	2.07275	60.7128
40086	16.6	0.20769	2.981		8.76709	2.07275	60.7128
40286	16.82	0.20971	2.983		8.88328	2.09291	60.7536
40488	16.82	0.20971	2.983		8.88328	2.09291	60.7536
40689	17.7	0.21131	2.979		9.34804	2.10888	60.6721
40889	17.7	0.21131	2.979		9.34804	2.10888	60.6721
41090	17.34	0.21333	2.981		9.15791	2.12904	60.7128
41290	17.34	0.21333	2.981		9.15791	2.12904	60.7128
41490	17.08	0.21562	2.982		9.02059	2.1519	60.7332
41691	17.08	0.21562	2.982		9.02059	2.1519	60.7332
41891	17.48	0.21748	2.985		9.23185	2.17046	60.7943
42091	17.48	0.21748	2.985		9.23185	2.17046	60.7943
42292	17.34	0.21953	2.983		9.15791	2.19092	60.7536
42492	17.34	0.21953	2.983		9.15791	2.19092	60.7536
42693	18.08	0.22147	2.975		9.54873	2.21028	60.5906
42893	18.08	0.22147	2.975		9.54873	2.21028	60.5906
43093	18.56	0.2231	2.982		9.80223	2.22655	60.7332
43294	18.56	0.2231	2.982		9.80223	2.22655	60.7332
43494	18.8	0.22482	2.985		9.92899	2.24371	60.7943
43696	18.8	0.22482	2.985		9.92899	2.24371	60.7943
43897	18.74	0.22684	2.986		9.8973	2.26387	60.8147
44097	18.74	0.22684	2.986		9.8973	2.26387	60.8147
44298	18.58	0.2289	2.987		9.8128	2.28443	60.835
44498	18.58	0.2289	2.987		9.8128	2.28443	60.835
44698	18.92	0.23088	2.978		9.99236	2.30419	60.6517
44899	18.92	0.23088	2.978		9.99236	2.30419	60.6517
45099	19.6	0.23264	2.983		10.3515	2.32176	60.7536
45299	19.6	0.23264	2.983		10.3515	2.32176	60.7536
45500	19.66	0.23452	2.984		10.3832	2.34052	60.7739
45700	20.1	0.23637	2.981		10.6156	2.35898	60.7128
45901	20.1	0.23637	2.981		10.6156	2.35898	60.7128
46101	20.42	0.23835	2.981		10.7846	2.37874	60.7128
46301	20.42	0.23835	2.981		10.7846	2.37874	60.7128
46502	20.78	0.24023	2.987		10.9747	2.3975	60.835
46702	20.14	0.24045	2.987		10.6367	2.3997	60.835
46903	20.44	0.24235	2.984		10.7951	2.41866	60.7739
47103	20.44	0.24235	2.984		10.7951	2.41866	60.7739
47303	20.76	0.24423	2.985		10.9641	2.43743	60.7943
47504	20.5	0.24413	2.977		10.8268	2.43643	60.6314
47704	20.9	0.24599	2.987		11.0381	2.45499	60.835
47906	20.9	0.24599	2.987		11.0381	2.45499	60.835
48107	20.48	0.24773	2.985		10.8163	2.47236	60.7943
48307	20.48	0.24773	2.985		10.8163	2.47236	60.7943
48508	20.84	0.24961	2.983		11.0064	2.49112	60.7536
48708	20.84	0.24961	2.983		11.0064	2.49112	60.7536
48908	20.52	0.25162	2.984		10.8374	2.51118	60.7739
49109	20.52	0.25162	2.984		10.8374	2.51118	60.7739
49309	20.78	0.25343	2.983		10.9747	2.52924	60.7536
49509	20.78	0.25343	2.983		10.9747	2.52924	60.7536
49710	20.88	0.25529	2.965		11.0275	2.5478	60.387
49910	20.88	0.25529	2.965		11.0275	2.5478	60.387
50111	21.64	0.25713	2.987		11.4289	2.56617	60.835
50311	21.64	0.25713	2.987		11.4289	2.56617	60.835
50511	21.6	0.25884	2.985		11.4078	2.58323	60.7943
50712	22.3	0.2605	2.99		11.7775	2.5998	60.8961
50912	22.32	0.26049	2.984		11.788	2.5997	60.7739
51114	22.5	0.26253	2.985		11.8831	2.62006	60.7943
51315	22.92	0.26228	2.987		12.1049	2.61756	60.835
51515	22.84	0.26421	2.988		12.0627	2.63683	60.8554
51716	22.84	0.26421	2.988		12.0627	2.63683	60.8554
51916	22.76	0.26613	2.977		12.0204	2.65599	60.6314
52116	22.76	0.26613	2.977		12.0204	2.65599	60.6314
52317	22.96	0.26806	2.986		12.126	2.67525	60.8147
52517	22.96	0.26806	2.986		12.126	2.67525	60.8147
52717	23.04	0.27004	2.985		12.1683	2.69501	60.7943
52918	23.04	0.27004	2.985		12.1683	2.69501	60.7943
53118	23.08	0.27192	2.983		12.1894	2.71377	60.7536
53319	23.08	0.27192	2.983		12.1894	2.71377	60.7536
53519	22.9	0.27379	2.984		12.0944	2.73244	60.7739
53719	22.9	0.27379	2.984		12.0944	2.73244	60.7739
53920	23.32	0.27574	2.988		12.3162	2.7519	60.8554
54120	23.32	0.27574	2.988		12.3162	2.7519	60.8554
54322	22.94	0.27767	2.982		12.1155	2.77116	60.7332
54523	22.94	0.27767	2.982		12.1155	2.77116	60.7332
54723	23.36	0.27942	2.984		12.3373	2.78862	60.7739
54924	23.36	0.27942	2.984		12.3373	2.78862	60.7739
55124	23.4	0.28131	2.985		12.3584	2.80749	60.7943
55324	24.96	0.28266	2.984		13.1823	2.82096	60.7739
55525	24.58	0.283	2.98		12.9816	2.82435	60.6925
55725	24.8	0.28452	2.988		13.0978	2.83952	60.8554
55925	25.08	0.28462	2.983		13.2457	2.84052	60.7536
56126	24.72	0.28655	2.985		13.0556	2.85978	60.7943
56326	24.72	0.28655	2.985		13.0556	2.85978	60.7943
56527	24.74	0.28844	2.983		13.0661	2.87864	60.7536
56727	24.74	0.28844	2.983		13.0661	2.87864	60.7536
56927	24.78	0.29023	2.985		13.0873	2.89651	60.7943
57128	24.78	0.29023	2.985		13.0873	2.89651	60.7943
57328	24.98	0.29196	2.982		13.1929	2.91377	60.7332
57530	25.98	0.29321	2.986		13.721	2.92625	60.8147
57731	25.64	0.29403	2.983		13.5414	2.93443	60.7536
57931	26.08	0.29467	2.984		13.7738	2.94082	60.7739
58132	26.08	0.29617	2.986		13.7738	2.95579	60.8147
58332	26.12	0.29696	2.988		13.795	2.96367	60.8554
58532	26.16	0.29784	2.983		13.8161	2.97246	60.7536
58733	26.28	0.2988	2.986		13.8795	2.98204	60.8147
58933	26.32	0.29949	2.985		13.9006	2.98892	60.7943
59133	26.46	0.30044	2.987		13.9745	2.9984	60.835
59334	26.54	0.30161	2.985		14.0168	3.01008	60.7943
59534	26.66	0.30237	2.986		14.0801	3.01766	60.8147
59735	26.68	0.30356	2.983		14.0907	3.02954	60.7536
59935	26.84	0.30461	2.983		14.1752	3.04002	60.7536
60135	26.82	0.30551	2.984		14.1647	3.049	60.7739
60336	26.96	0.30646	2.985		14.2386	3.05848	60.7943
60536	27	0.30735	2.984		14.2597	3.06737	60.7739
60738	27.12	0.30821	2.985		14.3231	3.07595	60.7943
60939	27.22	0.30937	2.986		14.3759	3.08752	60.8147
61139	27.28	0.31035	2.985		14.4076	3.09731	60.7943
61340	27.34	0.31133	2.986		14.4393	3.10709	60.8147
61540	27.34	0.31233	2.984		14.4393	3.11707	60.7739
61740	27.46	0.31329	2.986		14.5027	3.12665	60.8147
61941	27.5	0.31418	2.981		14.5238	3.13553	60.7128
62141	27.58	0.31515	2.986		14.566	3.14521	60.8147
62341	27.7	0.31621	2.984		14.6294	3.15579	60.7739
62542	27.8	0.31717	2.983		14.6822	3.16537	60.7536
62742	27.8	0.31797	2.983		14.6822	3.17335	60.7536
62943	27.88	0.31904	2.986		14.7245	3.18403	60.8147
63143	28.08	0.32007	2.985		14.8301	3.19431	60.7943
63343	28.18	0.32094	2.982		14.8829	3.20299	60.7332
63544	28.24	0.32192	2.986		14.9146	3.21277	60.8147
63744	28.32	0.32289	2.984		14.9569	3.22246	60.7739
63946	28.38	0.32377	2.984		14.9885	3.23124	60.7739
64147	28.5	0.32503	2.986		15.0519	3.24381	60.8147
64347	28.66	0.32577	2.987		15.1364	3.2512	60.835
64548	28.66	0.32677	2.985		15.1364	3.26118	60.7943
64748	28.78	0.32773	2.988		15.1998	3.27076	60.8554
64948	28.98	0.32876	2.984		15.3054	3.28104	60.7739
65149	29.04	0.32974	2.985		15.3371	3.29082	60.7943
65349	29.12	0.33071	2.983		15.3794	3.3005	60.7536
65549	29.16	0.33179	2.984		15.4005	3.31128	60.7739
65750	29.26	0.33266	2.983		15.4533	3.31996	60.7536
65950	29.36	0.33372	2.987		15.5061	3.33054	60.835
66151	29.54	0.33466	2.986		15.6012	3.33992	60.8147
66351	29.5	0.33588	2.987		15.5801	3.3521	60.835
66551	29.58	0.33665	2.988		15.6223	3.35978	60.8554
66752	29.66	0.33762	2.984		15.6646	3.36946	60.7739
66952	29.78	0.33838	2.988		15.7279	3.37705	60.8554
67153	29.8	0.33937	2.989		15.7385	3.38693	60.8758
67353	29.9	0.34034	2.983		15.7913	3.39661	60.7536
67553	30	0.3413	2.984		15.8441	3.40619	60.7739
67754	30.02	0.34249	2.987		15.8547	3.41806	60.835
67954	30.14	0.34335	2.985		15.9181	3.42665	60.7943
68156	30.36	0.34427	2.987		16.0343	3.43583	60.835
68357	30.34	0.34538	2.987		16.0237	3.44691	60.835
68557	30.48	0.34613	2.984		16.0976	3.45439	60.7739
68758	30.54	0.34721	2.985		16.1293	3.46517	60.7943
68958	30.6	0.34809	2.988		16.161	3.47395	60.8554
69158	30.64	0.34908	2.987		16.1821	3.48383	60.835
69359	30.76	0.35003	2.984		16.2455	3.49331	60.7739
69559	30.84	0.35081	2.984		16.2878	3.5011	60.7739
69759	30.88	0.35199	2.988		16.3089	3.51287	60.8554
69960	30.98	0.35296	2.985		16.3617	3.52255	60.7943
70160	30.94	0.35387	2.985		16.3406	3.53164	60.7943
70361	31.12	0.35501	2.985		16.4356	3.54301	60.7943
70561	31.22	0.35587	2.985		16.4885	3.5516	60.7943
70761	31.26	0.35686	2.982		16.5096	3.56148	60.7332
70962	31.32	0.35794	2.971		16.5413	3.57226	60.5092
71162	31.6	0.35874	2.985		16.6891	3.58024	60.7943
71364	31.56	0.35975	2.984		16.668	3.59032	60.7739
71565	31.62	0.36073	2.98		16.6997	3.6001	60.6925
71765	31.72	0.3617	2.983		16.7525	3.60978	60.7536
71966	31.68	0.36261	2.978		16.7314	3.61886	60.6517
72166	31.86	0.36365	2.982		16.8265	3.62924	60.7332
72366	32	0.3646	2.981		16.9004	3.63872	60.7128
72567	32.1	0.36557	2.982		16.9532	3.6484	60.7332
72767	32.14	0.36635	2.98		16.9743	3.65619	60.6925
72967	32.14	0.36735	2.982		16.9743	3.66617	60.7332
73168	32.26	0.36851	2.98		17.0377	3.67774	60.6925
73368	32.44	0.36935	2.981		17.1328	3.68613	60.7128
73569	32.42	0.37025	2.98		17.1222	3.69511	60.6925
73769	32.52	0.37112	2.983		17.175	3.70379	60.7536
73969	32.6	0.37229	2.983		17.2173	3.71547	60.7536
74170	32.64	0.37348	2.981		17.2384	3.72735	60.7128
74370	32.74	0.37444	2.985		17.2912	3.73693	60.7943
74572	32.78	0.37553	2.985		17.3124	3.7478	60.7943
74773	32.86	0.3764	2.983		17.3546	3.75649	60.7536
74973	32.96	0.37726	2.984		17.4074	3.76507	60.7739
75174	33.06	0.37823	2.981		17.4602	3.77475	60.7128
75374	33.1	0.37922	2.981		17.4814	3.78463	60.7128
75574	33.28	0.38015	2.984		17.5764	3.79391	60.7739
75775	33.24	0.38107	2.983		17.5553	3.80309	60.7536
75975	33.36	0.38212	2.981		17.6187	3.81357	60.7128
76175	33.48	0.38308	2.981		17.682	3.82315	60.7128
76376	33.58	0.38405	2.981		17.7349	3.83283	60.7128
76576	33.6	0.38504	2.984		17.7454	3.84271	60.7739
76777	33.78	0.38618	2.984		17.8405	3.85409	60.7739
76977	33.78	0.38708	2.984		17.8405	3.86307	60.7739
77177	33.92	0.38803	2.981		17.9144	3.87255	60.7128
77378	34.08	0.38897	2.984		17.9989	3.88194	60.7739
77578	34.1	0.38987	2.982		18.0095	3.89092	60.7332
77780	34.16	0.39094	2.986		18.0412	3.9016	60.8147
77981	34.28	0.3918	2.988		18.1046	3.91018	60.8554
78181	34.34	0.39268	2.984		18.1362	3.91896	60.7739
78382	34.38	0.39377	2.984		18.1574	3.92984	60.7739
78582	34.54	0.39481	2.982		18.2419	3.94022	60.7332
78782	34.66	0.39567	2.982		18.3053	3.9488	60.7332
78983	34.6	0.39679	2.981		18.2736	3.95998	60.7128
79183	34.74	0.39774	2.983		18.3475	3.96946	60.7536
79383	34.82	0.39861	2.985		18.3898	3.97814	60.7943
79584	35	0.39955	2.982		18.4848	3.98752	60.7332
79784	35.02	0.40064	2.981		18.4954	3.9984	60.7128
79985	35.08	0.40142	2.982		18.5271	4.00619	60.7332
80185	35.12	0.40241	2.984		18.5482	4.01607	60.7739
80385	35.12	0.40331	2.982		18.5482	4.02505	60.7332
80586	35.3	0.40455	2.984		18.6433	4.03743	60.7739
80786	35.42	0.4054	2.984		18.7066	4.04591	60.7739
80988	35.48	0.40638	2.983		18.7383	4.05569	60.7536
81189	35.58	0.40745	2.982		18.7911	4.06637	60.7332
81389	35.72	0.4084	2.983		18.8651	4.07585	60.7536
81590	35.82	0.40936	2.985		18.9179	4.08543	60.7943
81790	35.8	0.41037	2.983		18.9073	4.09551	60.7536
81990	35.92	0.41123	2.984		18.9707	4.10409	60.7739
82191	35.98	0.41211	2.985		19.0024	4.11287	60.7943
82391	36.24	0.41312	2.981		19.1397	4.12295	60.7128
82591	36.2	0.41413	2.984		19.1186	4.13303	60.7739
82792	36.36	0.41507	2.984		19.2031	4.14242	60.7739
82992	36.32	0.41599	2.981		19.182	4.1516	60.7128
83193	36.44	0.41705	2.979		19.2453	4.16218	60.6721
83393	36.52	0.41792	2.982		19.2876	4.17086	60.7332
83593	36.6	0.41889	2.984		19.3298	4.18054	60.7739
83794	36.66	0.41987	2.982		19.3615	4.19032	60.7332
83994	36.7	0.42086	2.983		19.3827	4.2002	60.7536
84196	36.82	0.42181	2.983		19.446	4.20968	60.7536
84397	36.88	0.42289	2.982		19.4777	4.22046	60.7332
84597	37.12	0.42381	2.981		19.6045	4.22964	60.7128
84798	37.14	0.4248	2.983		19.615	4.23952	60.7536
84998	37.2	0.42578	2.983		19.6467	4.2493	60.7536
85198	37.3	0.42685	2.982		19.6995	4.25998	60.7332
85399	37.4	0.42771	2.98		19.7523	4.26856	60.6925
85599	37.38	0.42872	2.986		19.7418	4.27864	60.8147
85799	37.48	0.42978	2.981		19.7946	4.28922	60.7128
86000	37.7	0.43051	2.98		19.9108	4.29651	60.6925
86200	37.6	0.43164	2.985		19.858	4.30778	60.7943
86401	37.72	0.4325	2.98		19.9214	4.31637	60.6925
86601	37.96	0.43361	2.984		20.0481	4.32745	60.7739
86801	37.94	0.43462	2.981		20.0375	4.33752	60.7128
87002	37.9	0.43554	2.984		20.0164	4.34671	60.7739
87202	38.06	0.43638	2.985		20.1009	4.35509	60.7943
87403	38.2	0.43743	2.98		20.1749	4.36557	60.6925
87603	38.26	0.43841	2.984		20.2065	4.37535	60.7739
87803	38.38	0.43937	2.983		20.2699	4.38493	60.7536
88004	38.46	0.44034	2.983		20.3122	4.39461	60.7536
88204	38.58	0.4413	2.979		20.3756	4.40419	60.6721
88406	38.7	0.44226	2.978		20.4389	4.41377	60.6517
88607	38.68	0.44316	2.985		20.4284	4.42275	60.7943
88807	38.78	0.44423	2.983		20.4812	4.43343	60.7536
89008	38.88	0.44519	2.982		20.534	4.44301	60.7332
89208	39	0.44605	2.984		20.5974	4.4516	60.7739
89408	39.18	0.44699	2.983		20.6924	4.46098	60.7536
89609	39.18	0.44819	2.983		20.6924	4.47295	60.7536
89809	39.26	0.44916	2.984		20.7347	4.48263	60.7739
90009	39.24	0.44997	2.984		20.7241	4.49072	60.7739
90210	39.48	0.45098	2.981		20.8509	4.5008	60.7128
90410	39.5	0.45188	2.984		20.8614	4.50978	60.7739
90611	39.64	0.45293	2.984		20.9354	4.52026	60.7739
90811	39.68	0.45381	2.981		20.9565	4.52904	60.7128
91011	39.68	0.45481	2.985		20.9565	4.53902	60.7943
91212	39.76	0.45578	2.983		20.9988	4.5487	60.7536
91412	39.88	0.45684	2.984		21.0621	4.55928	60.7739
91614	39.92	0.45773	2.98		21.0833	4.56816	60.6925
91815	40.02	0.45869	2.985		21.1361	4.57774	60.7943
92015	40.14	0.45975	2.982		21.1994	4.58832	60.7332
92216	40.18	0.46064	2.981		21.2206	4.59721	60.7128
92416	40.32	0.46159	2.984		21.2945	4.60669	60.7739
92616	40.32	0.46259	2.985		21.2945	4.61667	60.7943
92817	40.34	0.46348	2.981		21.3051	4.62555	60.7128
93017	40.6	0.46439	2.979		21.4424	4.63463	60.6721
93217	40.7	0.46546	2.982		21.4952	4.64531	60.7332
93418	40.8	0.46662	2.984		21.548	4.65689	60.7739
93618	40.74	0.46754	2.983		21.5163	4.66607	60.7536
93819	40.88	0.46859	2.982		21.5903	4.67655	60.7332
94019	40.98	0.46946	2.984		21.6431	4.68523	60.7739
94219	41.1	0.47062	2.984		21.7065	4.69681	60.7739
94420	41.08	0.47152	2.985		21.6959	4.70579	60.7943
94620	41.2	0.47238	2.982		21.7593	4.71437	60.7332
94822	41.32	0.47334	2.981		21.8226	4.72395	60.7128
95023	41.34	0.47433	2.982		21.8332	4.73383	60.7332
95223	41.32	0.47534	2.983		21.8226	4.74391	60.7536
95424	41.56	0.47625	2.984		21.9494	4.75299	60.7739
95624	41.62	0.47703	2.981		21.9811	4.76078	60.7128
95824	41.68	0.47821	2.984		22.0128	4.77255	60.7739
96025	41.84	0.47916	2.984		22.0973	4.78204	60.7739
96225	41.88	0.48024	2.984		22.1184	4.79281	60.7739
96425	41.9	0.48124	2.985		22.129	4.80279	60.7943
96626	42.16	0.48204	2.983		22.2663	4.81078	60.7536
96826	42.32	0.48309	2.982		22.3508	4.82126	60.7332
97027	42.32	0.48399	2.981		22.3508	4.83024	60.7128
97227	42.28	0.4851	2.982		22.3297	4.84132	60.7332
97427	42.44	0.48605	2.984		22.4142	4.8508	60.7739
97628	42.5	0.48703	2.984		22.4459	4.86058	60.7739
97828	42.56	0.4879	2.982		22.4775	4.86926	60.7332
98030	42.66	0.48887	2.982		22.5304	4.87894	60.7332
98231	42.8	0.48982	2.983		22.6043	4.88842	60.7536
98431	42.82	0.49081	2.983		22.6149	4.8983	60.7536
98632	42.88	0.49179	2.983		22.6465	4.90808	60.7536
98832	43	0.49275	2.986		22.7099	4.91766	60.8147
99032	43.1	0.49372	2.981		22.7627	4.92735	60.7128
99233	43.12	0.49471	2.983		22.7733	4.93723	60.7536
99433	43.22	0.49567	2.984		22.8261	4.94681	60.7739
99633	43.28	0.49665	2.982		22.8578	4.95659	60.7332
99834	43.52	0.49767	2.984		22.9846	4.96677	60.7739
100034	43.54	0.49896	2.982		22.9951	4.97964	60.7332
100235	43.66	0.50002	2.981		23.0585	4.99022	60.7128
100435	43.72	0.5009	2.982		23.0902	4.999	60.7332
100635	43.9	0.50194	2.981		23.1852	5.00938	60.7128
100836	43.94	0.50262	2.982		23.2064	5.01617	60.7332
101036	43.98	0.50381	2.985		23.2275	5.02804	60.7943
101238	44.12	0.50466	2.981		23.3014	5.03653	60.7128
101439	44.14	0.50565	2.98		23.312	5.04641	60.6925
101639	44.26	0.50651	2.985		23.3754	5.05499	60.7943
101840	44.2	0.50753	2.981		23.3437	5.06517	60.7128
102040	44.3	0.5085	2.983		23.3965	5.07485	60.7536
102240	44.42	0.50935	2.983		23.4599	5.08333	60.7536
102441	44.48	0.51033	2.981		23.4916	5.09311	60.7128
102641	44.5	0.51143	2.984		23.5021	5.10409	60.7739
102841	44.66	0.51237	2.986		23.5866	5.11347	60.8147
103042	44.68	0.51336	2.983		23.5972	5.12335	60.7536
103242	44.82	0.51411	2.983		23.6711	5.13084	60.7536
103443	44.8	0.51532	2.982		23.6606	5.14291	60.7332
103643	44.92	0.51618	2.983		23.7239	5.1515	60.7536
103843	45.02	0.51714	2.983		23.7768	5.16108	60.7536
104044	45.1	0.51802	2.982		23.819	5.16986	60.7332
104244	45.16	0.51919	2.983		23.8507	5.18154	60.7536
104446	45.26	0.52016	2.985		23.9035	5.19122	60.7943
104647	45.34	0.52113	2.983		23.9458	5.2009	60.7536
104847	45.28	0.52205	2.984		23.9141	5.21008	60.7739
105048	45.5	0.52288	2.985		24.0303	5.21836	60.7943
105248	45.5	0.52408	2.983		24.0303	5.23034	60.7536
105448	45.56	0.52495	2.982		24.062	5.23902	60.7332
105649	45.76	0.52588	2.983		24.1676	5.2483	60.7536
105849	45.72	0.5268	2.983		24.1465	5.25749	60.7536
106049	45.84	0.52786	2.985		24.2098	5.26806	60.7943
106250	46.02	0.52879	2.983		24.3049	5.27735	60.7536
106450	45.98	0.52971	2.983		24.2838	5.28653	60.7536
106651	46.06	0.53068	2.984		24.326	5.29621	60.7739
106851	46.18	0.53174	2.98		24.3894	5.30679	60.6925
107051	46.24	0.53262	2.982		24.4211	5.31557	60.7332
107252	46.38	0.53357	2.985		24.495	5.32505	60.7943
107452	46.4	0.53466	2.98		24.5056	5.33593	60.6925
107653	46.54	0.53561	2.981		24.5795	5.34541	60.7128
107853	46.5	0.53653	2.982		24.5584	5.35459	60.7332
108053	46.7	0.53736	2.984		24.664	5.36287	60.7739
108254	46.64	0.53848	2.985		24.6323	5.37405	60.7943
108454	46.8	0.53942	2.984		24.7168	5.38343	60.7739
108656	46.88	0.54049	2.982		24.7591	5.39411	60.7332
108857	46.88	0.54139	2.984		24.7591	5.40309	60.7739
109057	47.06	0.54243	2.984		24.8542	5.41347	60.7739
109258	47.02	0.54344	2.983		24.833	5.42355	60.7536
109458	47.2	0.54438	2.985		24.9281	5.43293	60.7943
109658	47.22	0.54537	2.986		24.9387	5.44281	60.8147
109859	47.36	0.54632	2.982		25.0126	5.4523	60.7332
110059	47.44	0.5472	2.984		25.0549	5.46108	60.7739
110259	47.46	0.54829	2.982		25.0654	5.47196	60.7332
110460	47.64	0.54923	2.984		25.1605	5.48134	60.7739
110660	47.62	0.55023	2.983		25.1499	5.49132	60.7536
110861	47.72	0.5512	2.984		25.2027	5.501	60.7739
111061	47.8	0.55207	2.984		25.245	5.50968	60.7739
111261	47.88	0.55304	2.984		25.2872	5.51936	60.7739
111462	47.94	0.55412	2.98		25.3189	5.53014	60.6925
111662	48	0.5551	2.984		25.3506	5.53992	60.7739
111864	48.06	0.55598	2.985		25.3823	5.5487	60.7943
112065	48.18	0.55694	2.984		25.4457	5.55828	60.7739
112265	48.26	0.55781	2.98		25.4879	5.56697	60.6925
112466	48.3	0.5588	2.983		25.509	5.57685	60.7536
112666	48.36	0.55997	2.981		25.5407	5.58852	60.7128
112866	48.52	0.56082	2.983		25.6252	5.59701	60.7536
113067	48.6	0.56179	2.984		25.6675	5.60669	60.7739
113267	48.6	0.56289	2.984		25.6675	5.61766	60.7739
113467	48.72	0.56395	2.985		25.7309	5.62824	60.7943
113668	48.74	0.56484	2.984		25.7414	5.63713	60.7739
113868	48.88	0.56579	2.983		25.8154	5.64661	60.7536
114069	49.02	0.56684	2.983		25.8893	5.65709	60.7536
114269	49.08	0.56772	2.984		25.921	5.66587	60.7739
114469	49.12	0.56841	2.983		25.9421	5.67275	60.7536
114670	49.22	0.56967	2.983		25.9949	5.68533	60.7536
114870	49.44	0.5706	2.983		26.1111	5.69461	60.7536
115072	49.36	0.57152	2.983		26.0689	5.70379	60.7536
115273	49.38	0.57252	2.984		26.0794	5.71377	60.7739
115473	49.5	0.57338	2.981		26.1428	5.72236	60.7128
115674	49.66	0.57432	2.981		26.2273	5.73174	60.7128
115874	49.78	0.57538	2.981		26.2907	5.74232	60.7128
116074	49.78	0.57638	2.982		26.2907	5.7523	60.7332
116275	49.94	0.57762	2.984		26.3752	5.76467	60.7739
116475	49.96	0.57841	2.982		26.3858	5.77255	60.7332
116675	49.96	0.57951	2.985		26.3858	5.78353	60.7943
116876	50.2	0.58053	2.983		26.5125	5.79371	60.7536
117076	50.2	0.58143	2.983		26.5125	5.80269	60.7536
117277	50.3	0.5823	2.981		26.5653	5.81138	60.7128
117477	50.34	0.58318	2.983		26.5864	5.82016	60.7536
117677	50.52	0.58432	2.983		26.6815	5.83154	60.7536
117878	50.56	0.5853	2.986		26.7026	5.84132	60.8147
118078	50.58	0.5862	2.985		26.7132	5.8503	60.7943
118280	50.72	0.58715	2.985		26.7871	5.85978	60.7943
118481	50.84	0.58821	2.984		26.8505	5.87036	60.7739
118681	50.82	0.58911	2.982		26.84	5.87934	60.7332
118882	51.02	0.59004	2.984		26.9456	5.88862	60.7739
119082	51.04	0.59104	2.981		26.9561	5.8986	60.7128
119282	51.16	0.59199	2.983		27.0195	5.90808	60.7536
119483	51.26	0.59276	2.983		27.0723	5.91577	60.7536
119683	51.26	0.59386	2.98		27.0723	5.92675	60.6925
119883	51.4	0.59481	2.985		27.1463	5.93623	60.7943
120084	51.5	0.59578	2.984		27.1991	5.94591	60.7739
120284	51.58	0.59685	2.984		27.2413	5.95659	60.7739
120485	51.6	0.59794	2.984		27.2519	5.96747	60.7739
120685	51.84	0.59896	2.985		27.3787	5.97764	60.7943
120885	51.84	0.59996	2.985		27.3787	5.98762	60.7943
121086	51.9	0.60074	2.983		27.4103	5.99541	60.7536
121286	51.94	0.60172	2.986		27.4315	6.00519	60.8147
121488	52.02	0.60279	2.984		27.4737	6.01587	60.7739
121689	52.06	0.60368	2.984		27.4948	6.02475	60.7739
121889	52.06	0.60468	2.984		27.4948	6.03473	60.7739
122090	52.16	0.60554	2.981		27.5477	6.04331	60.7128
122290	52.18	0.60664	2.985		27.5582	6.05429	60.7943
122490	52.24	0.60752	2.985		27.5899	6.06307	60.7943
122691	52.32	0.60869	2.985		27.6322	6.07475	60.7943
122891	52.46	0.60954	2.987		27.7061	6.08323	60.835
123091	52.46	0.61044	2.983		27.7061	6.09222	60.7536
123292	52.62	0.61148	2.987		27.7906	6.10259	60.835
123492	52.6	0.61249	2.984		27.78	6.11267	60.7739
123693	52.8	0.61342	2.983		27.8857	6.12196	60.7536
123893	52.86	0.6145	2.984		27.9174	6.13273	60.7739
124093	52.9	0.61559	2.985		27.9385	6.14361	60.7943
124294	52.98	0.61666	2.984		27.9807	6.15429	60.7739
124494	53.14	0.6175	2.983		28.0652	6.16267	60.7536
124696	53.16	0.61849	2.98		28.0758	6.17255	60.6925
124897	53.28	0.61935	2.982		28.1392	6.18114	60.7332
125097	53.34	0.62033	2.987		28.1709	6.19092	60.835
125298	53.4	0.62121	2.983		28.2026	6.1997	60.7536
125498	53.38	0.62222	2.984		28.192	6.20978	60.7739
125698	53.54	0.62326	2.981		28.2765	6.22016	60.7128
125899	53.62	0.62423	2.983		28.3187	6.22984	60.7536
126099	53.72	0.6251	2.982		28.3716	6.23852	60.7332
126299	53.8	0.62607	2.983		28.4138	6.2482	60.7536
126500	53.86	0.62705	2.983		28.4455	6.25798	60.7536
126700	53.94	0.62792	2.982		28.4877	6.26667	60.7332
126901	54.06	0.62888	2.982		28.5511	6.27625	60.7332
127101	54.12	0.62996	2.982		28.5828	6.28703	60.7332
127301	54.14	0.63075	2.981		28.5934	6.29491	60.7128
127502	54.16	0.63194	2.982		28.6039	6.30679	60.7332
127702	54.32	0.63289	2.984		28.6884	6.31627	60.7739
127903	54.4	0.63376	2.983		28.7307	6.32495	60.7536
128103	54.4	0.63476	2.987		28.7307	6.33493	60.835
128303	54.52	0.63572	2.983		28.7941	6.34451	60.7536
128504	54.56	0.6366	2.985		28.8152	6.35329	60.7943
128704	54.58	0.6376	2.982		28.8258	6.36327	60.7332
128906	54.78	0.63863	2.984		28.9314	6.37355	60.7739
129107	54.8	0.63962	2.984		28.9419	6.38343	60.7739
129307	54.82	0.64081	2.983		28.9525	6.39531	60.7536
129508	55	0.64175	2.987		29.0476	6.40469	60.835
129708	55.06	0.64273	2.983		29.0793	6.41447	60.7536
129908	55.12	0.64371	2.984		29.1109	6.42425	60.7739
130109	55.24	0.64467	2.983		29.1743	6.43383	60.7536
130309	55.3	0.64575	2.985		29.206	6.44461	60.7943
130509	55.36	0.64672	2.985		29.2377	6.45429	60.7943
130710	55.5	0.64748	2.983		29.3116	6.46188	60.7536
130910	55.58	0.64845	2.986		29.3539	6.47156	60.8147
131111	55.62	0.64953	2.982		29.375	6.48234	60.7332
131311	55.68	0.65061	2.98		29.4067	6.49311	60.6925
131511	55.88	0.65134	2.983		29.5123	6.5004	60.7536
131712	55.9	0.65254	2.983		29.5229	6.51238	60.7536
131912	55.92	0.65343	2.984		29.5335	6.52126	60.7739
132114	55.98	0.65441	2.986		29.5651	6.53104	60.8147
132315	55.9	0.65544	2.984		29.5229	6.54132	60.7739
132515	56.02	0.65639	2.982		29.5863	6.5508	60.7332
132716	56.16	0.65744	2.986		29.6602	6.56128	60.8147
132916	56.22	0.65832	2.985		29.6919	6.57006	60.7943
133116	56.28	0.6592	2.983		29.7236	6.57884	60.7536
133317	56.34	0.66018	2.985		29.7553	6.58862	60.7943
133517	56.44	0.66115	2.98		29.8081	6.5983	60.6925
133717	56.52	0.66212	2.983		29.8503	6.60798	60.7536
133918	56.56	0.6632	2.985		29.8715	6.61876	60.7943
134118	56.6	0.66419	2.983		29.8926	6.62864	60.7536
134319	56.76	0.66523	2.981		29.9771	6.63902	60.7128
134519	56.68	0.66616	2.984		29.9348	6.6483	60.7739
134719	56.84	0.66701	2.985		30.0193	6.65679	60.7943
134920	56.86	0.6679	2.984		30.0299	6.66567	60.7739
135120	56.98	0.66896	2.985		30.0933	6.67625	60.7943
135322	56.98	0.66986	2.983		30.0933	6.68523	60.7536
135523	57.14	0.671	2.984		30.1778	6.69661	60.7739
135723	57.24	0.67187	2.984		30.2306	6.70529	60.7739
135924	57.2	0.67308	2.985		30.2095	6.71737	60.7943
136124	57.36	0.67382	2.982		30.294	6.72475	60.7332
136324	57.36	0.67482	2.985		30.294	6.73473	60.7943
136525	57.48	0.67578	2.983		30.3574	6.74431	60.7536
136725	57.58	0.67685	2.985		30.4102	6.75499	60.7943
136925	57.66	0.67782	2.984		30.4524	6.76467	60.7739
137126	57.7	0.67871	2.985		30.4735	6.77355	60.7943
137326	57.88	0.67964	2.982		30.5686	6.78283	60.7332
137527	57.82	0.68066	2.983		30.5369	6.79301	60.7536
137727	57.98	0.68151	2.984		30.6214	6.8015	60.7739
137927	58.04	0.68259	2.981		30.6531	6.81228	60.7128
138128	58.14	0.68345	2.985		30.7059	6.82086	60.7943
138328	58.22	0.68452	2.985		30.7482	6.83154	60.7943
138530	58.3	0.6856	2.984		30.7904	6.84232	60.7739
138731	58.34	0.68668	2.982		30.8116	6.85309	60.7332
138931	58.44	0.68775	2.981		30.8644	6.86377	60.7128
139132	58.6	0.68859	2.983		30.9489	6.87216	60.7536
139332	58.6	0.68959	2.983		30.9489	6.88214	60.7536
139532	58.64	0.69058	2.982		30.97	6.89202	60.7332
139733	58.7	0.69156	2.983		31.0017	6.9018	60.7536
139933	58.76	0.69243	2.982		31.0334	6.91048	60.7332
140133	58.86	0.6934	2.985		31.0862	6.92016	60.7943
140334	58.98	0.69436	2.981		31.1496	6.92974	60.7128
140534	59.06	0.69533	2.986		31.1918	6.93942	60.8147
140735	58.98	0.69636	2.985		31.1496	6.9497	60.7943
140935	59.08	0.69742	2.984		31.2024	6.96028	60.7739
141135	59.2	0.69828	2.981		31.2657	6.96886	60.7128
141336	59.28	0.69915	2.987		31.308	6.97754	60.835
141536	59.28	0.70025	2.984		31.308	6.98852	60.7739
141738	59.5	0.70098	2.986		31.4242	6.99581	60.8147
141939	59.42	0.7021	2.984		31.3819	7.00699	60.7739
142139	59.56	0.70325	2.984		31.4559	7.01846	60.7739
142340	59.66	0.70412	2.985		31.5087	7.02715	60.7943
142540	59.72	0.7051	2.983		31.5404	7.03693	60.7536
142740	59.8	0.70597	2.985		31.5826	7.04561	60.7943
142941	59.8	0.70707	2.985		31.5826	7.05659	60.7943
143141	59.94	0.70802	2.985		31.6566	7.06607	60.7943
143341	59.96	0.70901	2.983		31.6671	7.07595	60.7536
143542	60.06	0.70998	2.982		31.7199	7.08563	60.7332
143742	60.12	0.71096	2.985		31.7516	7.09541	60.7943
143943	60.22	0.71192	2.983		31.8044	7.10499	60.7536
144143	60.3	0.7128	2.983		31.8467	7.11377	60.7536
144343	60.38	0.71387	2.983		31.889	7.12445	60.7536
144544	60.44	0.71475	2.984		31.9206	7.13323	60.7739
144744	60.46	0.71594	2.98		31.9312	7.14511	60.6925
144946	60.52	0.71662	2.987		31.9629	7.1519	60.835
145147	60.68	0.71776	2.984		32.0474	7.16327	60.7739
145347	60.68	0.71856	2.987		32.0474	7.17126	60.835
145548	60.8	0.71962	2.983		32.1108	7.18184	60.7536
145748	60.9	0.72069	2.982		32.1636	7.19251	60.7332
145948	60.88	0.72169	2.983		32.153	7.2025	60.7536
146149	61.04	0.72264	2.982		32.2375	7.21198	60.7332
146349	61.14	0.7237	2.984		32.2903	7.22255	60.7739
146549	61.16	0.72459	2.982		32.3009	7.23144	60.7332
146750	61.14	0.7256	2.983		32.2903	7.24152	60.7536
146950	61.36	0.72652	2.984		32.4065	7.2507	60.7739
147151	61.4	0.72761	2.984		32.4277	7.26158	60.7739
147351	61.44	0.7285	2.983		32.4488	7.27046	60.7536
147551	61.44	0.7297	2.984		32.4488	7.28244	60.7739
147752	61.56	0.73045	2.982		32.5122	7.28992	60.7332
147952	61.7	0.73141	2.983		32.5861	7.2995	60.7536
148153	61.78	0.73238	2.984		32.6283	7.30918	60.7739
148353	61.78	0.73338	2.982		32.6283	7.31916	60.7332
148553	61.9	0.73424	2.983		32.6917	7.32774	60.7536
148754	61.94	0.73532	2.982		32.7128	7.33852	60.7332
148954	62	0.7364	2.984		32.7445	7.3493	60.7739
149156	62	0.7373	2.984		32.7445	7.35828	60.7739
149357	62.1	0.73817	2.987		32.7973	7.36697	60.835
149557	62.12	0.73926	2.985		32.8079	7.37784	60.7943
149758	62.3	0.7402	2.983		32.903	7.38723	60.7536
149958	62.34	0.74128	2.984		32.9241	7.398	60.7739
150158	62.34	0.74228	2.985		32.9241	7.40798	60.7943
150359	62.46	0.74314	2.981		32.9875	7.41657	60.7128
150559	62.6	0.74409	2.986		33.0614	7.42605	60.8147
150759	62.62	0.74508	2.981		33.072	7.43593	60.7128
150960	62.72	0.74615	2.983		33.1248	7.44661	60.7536
151160	62.8	0.74722	2.961		33.167	7.45729	60.3055
151361	62.76	0.74833	2.851		33.1459	7.46836	58.0652
151561	62.66	0.74957	2.744		33.0931	7.48074	55.8859
151761	62.66	0.75057	2.636		33.0931	7.49072	53.6864
151962	62.58	0.7517	2.532		33.0509	7.502	51.5682
152162	62.6	0.75249	2.442		33.0614	7.50988	49.7352
152364	62.46	0.75354	2.362		32.9875	7.52036	48.1059
152565	62.44	0.75445	2.285		32.9769	7.52944	46.5377
152765	62.44	0.75545	2.215		32.9769	7.53942	45.112
152966	62.28	0.7564	2.155		32.8924	7.5489	43.89
153166	62.34	0.75748	2.093		32.9241	7.55968	42.6273
153366	62.2	0.75853	2.036		32.8502	7.57016	41.4664
153567	62.18	0.75944	1.986		32.8396	7.57924	40.4481
153767	62.2	0.76043	1.941		32.8502	7.58912	39.5316
153967	62.18	0.76154	1.894		32.8396	7.6002	38.5743
154168	62.1	0.76257	1.852		32.7973	7.61048	37.7189
154368	62.1	0.76357	1.813		32.7973	7.62046	36.9246
154569	62.18	0.76464	1.777		32.8396	7.63114	36.1914
154769	62.12	0.76546	1.74		32.8079	7.63932	35.4379
154969	62.16	0.76654	1.707		32.829	7.6501	34.7658
155170	62.08	0.76747	1.678		32.7868	7.65938	34.1752
155370	62.1	0.76847	1.644		32.7973	7.66936	33.4827
155572	62.16	0.76944	1.612		32.829	7.67904	32.831
155773	62.16	0.77034	1.586		32.829	7.68802	32.3014
155973	62.18	0.77134	1.557		32.8396	7.698	31.7108
156174	62.18	0.77244	1.533		32.8396	7.70898	31.222
156374	62.08	0.77347	1.51		32.7868	7.71926	30.7536
156574	62.1	0.77447	1.488		32.7973	7.72924	30.3055
156775	62.16	0.77544	1.463		32.829	7.73892	29.7963
156975	62.16	0.77654	1.442		32.829	7.7499	29.3686
157175	62.18	0.77754	1.419		32.8396	7.75988	28.9002
157376	62.2	0.77843	1.403		32.8502	7.76876	28.5743
157576	62.1	0.77947	1.384		32.7973	7.77914	28.1874
157777	62.16	0.78044	1.364		32.829	7.78882	27.78
157977	62.22	0.78142	1.346		32.8607	7.7986	27.4134
158177	62.18	0.78244	1.33		32.8396	7.80878	27.0876
158378	62.28	0.7833	1.316		32.8924	7.81737	26.8024
158578	62.3	0.7843	1.299		32.903	7.82735	26.4562
158780	62.28	0.7853	1.282		32.8924	7.83733	26.11
158981	62.3	0.7864	1.27		32.903	7.8483	25.8656
159181	62.3	0.7873	1.258		32.903	7.85729	25.6212
159382	62.3	0.7884	1.243		32.903	7.86826	25.3157
159582	62.3	0.7894	1.227		32.903	7.87824	24.9898
159782	62.36	0.79037	1.214		32.9347	7.88792	24.7251
159983	62.48	0.79123	1.206		32.998	7.89651	24.5621
160183	62.4	0.79226	1.188		32.9558	7.90679	24.1955
160383	62.4	0.79336	1.177		32.9558	7.91776	23.9715
160584	62.48	0.79433	1.167		32.998	7.92745	23.7678
160784	62.4	0.79526	1.153		32.9558	7.93673	23.4827
160985	62.48	0.79633	1.144		32.998	7.94741	23.2994
161185	62.62	0.79728	1.13		33.072	7.95689	23.0143
161385	62.62	0.79818	1.119		33.072	7.96587	22.7902
161586	62.66	0.79927	1.111		33.0931	7.97675	22.6273
161786	62.64	0.80018	1.102		33.0825	7.98583	22.444
161988	62.64	0.80118	1.091		33.0825	7.99581	22.22
162189	62.7	0.80216	1.084		33.1142	8.00559	22.0774
162389	62.74	0.80314	1.073		33.1354	8.01537	21.8534
162590	62.78	0.80413	1.064		33.1565	8.02525	21.6701
162790	62.84	0.80511	1.056		33.1882	8.03503	21.5071
162990	62.82	0.80621	1.049		33.1776	8.04601	21.3646
163191	62.84	0.80721	1.038		33.1882	8.05599	21.1405
163391	62.98	0.80806	1.029		33.2621	8.06447	20.9572
163591	62.98	0.80906	1.019		33.2621	8.07445	20.7536
163792	63	0.81015	1.013		33.2727	8.08533	20.6314
163992	63.02	0.81104	1.003		33.2832	8.09421	20.4277
164193	63.1	0.81201	0.996		33.3255	8.10389	20.2851
164393	63.04	0.81304	0.988		33.2938	8.11417	20.1222
164593	63.16	0.81399	0.981		33.3572	8.12365	19.9796
164794	63.18	0.81509	0.97		33.3677	8.13463	19.7556
164994	63.08	0.81602	0.964		33.3149	8.14391	19.6334
165196	63.18	0.81699	0.959		33.3677	8.15359	19.5316
165397	63.24	0.81797	0.952		33.3994	8.16337	19.389
165597	63.22	0.81907	0.948		33.3889	8.17435	19.3075
165798	63.34	0.82003	0.938		33.4522	8.18393	19.1039
165998	63.42	0.821	0.933		33.4945	8.19361	19.002
166198	63.4	0.82201	0.926		33.4839	8.20369	18.8595
166399	63.38	0.82302	0.919		33.4734	8.21377	18.7169
166599	63.44	0.8239	0.909		33.5051	8.22255	18.5132
166799	63.66	0.82482	0.906		33.6212	8.23174	18.4521
167000	63.62	0.82573	0.9		33.6001	8.24082	18.3299
167200	63.58	0.82685	0.892		33.579	8.252	18.167
167401	63.7	0.82771	0.887		33.6424	8.26058	18.0652
167601	63.74	0.82869	0.883		33.6635	8.27036	17.9837
167801	63.8	0.82987	0.876		33.6952	8.28214	17.8411
168002	63.82	0.83086	0.872		33.7057	8.29202	17.7597
168202	63.88	0.83184	0.867		33.7374	8.3018	17.6578
168403	63.84	0.83286	0.864		33.7163	8.31198	17.5967
168603	64	0.8339	0.855		33.8008	8.32236	17.4134
168803	64	0.8348	0.855		33.8008	8.33134	17.4134
169004	64.08	0.83577	0.847		33.8431	8.34102	17.2505
169204	64.18	0.83674	0.844		33.8959	8.3507	17.1894
169406	64.16	0.83764	0.84		33.8853	8.35968	17.1079
169607	64.18	0.83874	0.833		33.8959	8.37066	16.9654
169807	64.26	0.83971	0.83		33.9381	8.38034	16.9043
170008	64.28	0.8408	0.824		33.9487	8.39122	16.7821
170208	64.32	0.84179	0.82		33.9698	8.4011	16.7006
170408	64.32	0.84269	0.817		33.9698	8.41008	16.6395
170609	64.38	0.84377	0.808		34.0015	8.42086	16.4562
170809	64.34	0.84458	0.804		33.9804	8.42894	16.3747
171009	64.48	0.84553	0.798		34.0543	8.43842	16.2525
171210	64.42	0.84655	0.797		34.0226	8.4486	16.2322
171410	64.6	0.84759	0.792		34.1177	8.45898	16.1303
171611	64.6	0.84849	0.787		34.1177	8.46796	16.0285
171811	64.58	0.8496	0.782		34.1071	8.47904	15.9267
172011	64.68	0.85056	0.78		34.1599	8.48862	15.8859
172212	64.64	0.85158	0.776		34.1388	8.4988	15.8045
172412	64.78	0.85263	0.771		34.2128	8.50928	15.7026
172614	64.76	0.85363	0.771		34.2022	8.51926	15.7026
172815	64.88	0.85459	0.764		34.2656	8.52884	15.5601
173015	64.82	0.85561	0.767		34.2339	8.53902	15.6212
173216	64.94	0.85657	0.76		34.2973	8.5486	15.4786
173416	64.96	0.85746	0.754		34.3078	8.55749	15.3564
173616	65.04	0.85854	0.754		34.3501	8.56826	15.3564
173817	65.1	0.85962	0.749		34.3818	8.57904	15.2546
174017	65.16	0.86059	0.745		34.4134	8.58872	15.1731
174217	65.18	0.86149	0.742		34.424	8.5977	15.112
174418	65.24	0.86257	0.74		34.4557	8.60848	15.0713
174618	65.2	0.86358	0.734		34.4346	8.61856	14.9491
174819	65.3	0.86445	0.731		34.4874	8.62725	14.888
175019	65.26	0.86536	0.727		34.4663	8.63633	14.8065
175219	65.4	0.86631	0.727		34.5402	8.64581	14.8065
175420	65.46	0.86729	0.722		34.5719	8.65559	14.7047
175620	65.5	0.86818	0.718		34.593	8.66447	14.6232
175822	65.48	0.86918	0.716		34.5825	8.67445	14.5825
176023	65.68	0.87031	0.713		34.6881	8.68573	14.5214
176223	65.68	0.87121	0.708		34.6881	8.69471	14.4196
176424	65.7	0.87221	0.706		34.6986	8.70469	14.3788
176624	65.76	0.87328	0.704		34.7303	8.71537	14.3381
176824	65.84	0.87416	0.702		34.7726	8.72415	14.2974
177025	65.88	0.87514	0.698		34.7937	8.73393	14.2159
177225	65.9	0.87614	0.691		34.8043	8.74391	14.0733
177425	65.94	0.87702	0.692		34.8254	8.75269	14.0937
177626	65.98	0.87811	0.69		34.8465	8.76357	14.053
177826	66.12	0.87906	0.683		34.9205	8.77305	13.9104
178027	66.14	0.88005	0.683		34.931	8.78293	13.9104
178227	66.18	0.88104	0.682		34.9522	8.79281	13.89
178427	66.22	0.88192	0.678		34.9733	8.8016	13.8086
178628	66.3	0.883	0.672		35.0155	8.81238	13.6864
178828	66.28	0.884	0.67		35.005	8.82236	13.6456
179030	66.32	0.88489	0.669		35.0261	8.83124	13.6253
179231	66.38	0.88597	0.664		35.0578	8.84202	13.5234
179431	66.4	0.88716	0.663		35.0683	8.85389	13.5031
179632	66.46	0.88804	0.661		35.1	8.86267	13.4623
179832	66.56	0.8889	0.658		35.1528	8.87126	13.4012
180032	66.56	0.8899	0.657		35.1528	8.88124	13.3809
180233	66.72	0.89075	0.655		35.2373	8.88972	13.3401
180433	66.68	0.89176	0.652		35.2162	8.8998	13.279
180633	66.72	0.89285	0.651		35.2373	8.91068	13.2587
180834	66.74	0.89404	0.65		35.2479	8.92255	13.2383
181034	66.86	0.895	0.647		35.3113	8.93214	13.1772
181235	66.88	0.89589	0.645		35.3218	8.94102	13.1365
181435	66.88	0.89699	0.641		35.3218	8.952	13.055
181635	66.92	0.89788	0.641		35.343	8.96088	13.055
181836	67	0.89885	0.638		35.3852	8.97056	12.9939
182036	67.02	0.89984	0.636		35.3958	8.98044	12.9532
182238	67.02	0.90084	0.635		35.3958	8.99042	12.9328
182439	67.06	0.90183	0.632		35.4169	9.0003	12.8717
182639	67.12	0.90311	0.628		35.4486	9.01307	12.7902
182840	67.14	0.904	0.623		35.4592	9.02196	12.6884
183040	67.18	0.90489	0.621		35.4803	9.03084	12.6477
183240	67.16	0.90589	0.622		35.4697	9.04082	12.668
183441	67.18	0.90689	0.621		35.4803	9.0508	12.6477
183641	67.16	0.90769	0.617		35.4697	9.05878	12.5662
183841	67.3	0.90875	0.62		35.5437	9.06936	12.6273
184042	67.24	0.90967	0.616		35.512	9.07854	12.5458
184242	67.34	0.91063	0.613		35.5648	9.08812	12.4847
184443	67.4	0.91161	0.609		35.5965	9.0979	12.4033
184643	67.42	0.9125	0.604		35.607	9.10679	12.3014
184843	67.42	0.9136	0.607		35.607	9.11776	12.3625
185044	67.58	0.91445	0.603		35.6915	9.12625	12.2811
185244	67.54	0.91546	0.602		35.6704	9.13633	12.2607
185446	67.5	0.91647	0.601		35.6493	9.14641	12.2403
185647	67.6	0.91744	0.598		35.7021	9.15609	12.1792
185847	67.74	0.91829	0.597		35.776	9.16457	12.1589
186048	67.72	0.9195	0.592		35.7655	9.17665	12.057
186248	67.86	0.92065	0.591		35.8394	9.18812	12.0367
186448	67.86	0.92165	0.592		35.8394	9.1981	12.057
186649	67.88	0.92244	0.587		35.85	9.20599	11.9552
186849	67.96	0.92351	0.586		35.8922	9.21667	11.9348
187049	67.98	0.92461	0.583		35.9028	9.22764	11.8737
187250	68.08	0.92547	0.586		35.9556	9.23623	11.9348
187450	68.04	0.92659	0.584		35.9345	9.24741	11.8941
187651	68.1	0.92747	0.583		35.9662	9.25619	11.8737
187851	68.18	0.92854	0.579		36.0084	9.26687	11.7923
188051	68.22	0.92952	0.574		36.0296	9.27665	11.6904
188252	68.28	0.9306	0.574		36.0612	9.28743	11.6904
188452	68.3	0.9316	0.575		36.0718	9.29741	11.7108
188653	68.28	0.9324	0.569		36.0612	9.30539	11.5886
188853	68.38	0.93347	0.573		36.1141	9.31607	11.6701
189053	68.4	0.93456	0.567		36.1246	9.32695	11.5479
189254	68.52	0.93542	0.567		36.188	9.33553	11.5479
189454	68.52	0.93632	0.565		36.188	9.34451	11.5071
189656	68.52	0.93742	0.562		36.188	9.35549	11.446
189857	68.58	0.9384	0.561		36.2197	9.36527	11.4257
190057	68.58	0.9393	0.559		36.2197	9.37425	11.3849
190258	68.72	0.94015	0.556		36.2936	9.38273	11.3238
190458	68.76	0.94133	0.557		36.3147	9.39451	11.3442
190658	68.76	0.94233	0.555		36.3147	9.40449	11.3035
190859	68.78	0.94323	0.554		36.3253	9.41347	11.2831
191059	68.92	0.94428	0.554		36.3992	9.42395	11.2831
191259	68.96	0.94516	0.549		36.4204	9.43273	11.1813
191460	68.94	0.94607	0.548		36.4098	9.44182	11.1609
191660	69	0.94725	0.545		36.4415	9.45359	11.0998
191861	69.08	0.94812	0.547		36.4837	9.46228	11.1405
192061	69.1	0.94892	0.546		36.4943	9.47026	11.1202
192261	69.18	0.94999	0.545		36.5366	9.48094	11.0998
192462	69.22	0.95097	0.541		36.5577	9.49072	11.0183
192662	69.34	0.95203	0.542		36.6211	9.5013	11.0387
192864	69.36	0.95292	0.541		36.6316	9.51018	11.0183
193065	69.4	0.95401	0.537		36.6528	9.52106	10.9369
193265	69.42	0.9549	0.535		36.6633	9.52994	10.8961
193466	69.46	0.95589	0.533		36.6844	9.53982	10.8554
193666	69.54	0.95696	0.534		36.7267	9.5505	10.8758
193866	69.52	0.95797	0.535		36.7161	9.56058	10.8961
194067	69.58	0.95885	0.531		36.7478	9.56936	10.8147
194267	69.6	0.95984	0.533		36.7584	9.57924	10.8554
194467	69.7	0.96091	0.528		36.8112	9.58992	10.7536
194668	69.72	0.9619	0.526		36.8218	9.5998	10.7128
194868	69.78	0.96288	0.525		36.8534	9.60958	10.6925
195069	69.92	0.96383	0.524		36.9274	9.61906	10.6721
195269	70	0.9649	0.522		36.9696	9.62974	10.6314
195469	70	0.966	0.519		36.9696	9.64072	10.5703
195670	69.98	0.96691	0.517		36.9591	9.6498	10.5295
195870	70.08	0.96787	0.519		37.0119	9.65938	10.5703
196072	70.12	0.96876	0.519		37.033	9.66826	10.5703
196273	70.22	0.96982	0.518		37.0858	9.67884	10.5499
196473	70.14	0.97065	0.519		37.0436	9.68713	10.5703
196674	70.26	0.97191	0.514		37.107	9.6997	10.4684
196874	70.28	0.9727	0.512		37.1175	9.70758	10.4277
197074	70.32	0.97379	0.512		37.1386	9.71846	10.4277
197275	70.36	0.97477	0.512		37.1598	9.72824	10.4277
197475	70.38	0.97577	0.511		37.1703	9.73822	10.4073
197675	70.44	0.97675	0.509		37.202	9.748	10.3666
197876	70.54	0.97771	0.507		37.2548	9.75758	10.3259
198076	70.7	0.97866	0.509		37.3393	9.76707	10.3666
198277	70.68	0.97966	0.505		37.3288	9.77705	10.2851
198477	70.78	0.98053	0.504		37.3816	9.78573	10.2648
198677	70.74	0.98164	0.502		37.3605	9.79681	10.224
198878	70.84	0.98271	0.505		37.4133	9.80749	10.2851
199078	70.9	0.98359	0.501		37.445	9.81627	10.2037
199280	70.94	0.98467	0.501		37.4661	9.82705	10.2037
199481	70.98	0.98566	0.502		37.4872	9.83693	10.224
199681	71.06	0.98653	0.498		37.5295	9.84561	10.1426
199882	70.94	0.98767	0.498		37.4661	9.85699	10.1426
200082	71.06	0.98853	0.494		37.5295	9.86557	10.0611
200282	71.18	0.98959	0.493		37.5928	9.87615	10.0407
200483	71.3	0.99045	0.493		37.6562	9.88473	10.0407
200683	71.34	0.99153	0.493		37.6773	9.89551	10.0407
200883	71.24	0.99257	0.493		37.6245	9.90589	10.0407
201084	71.28	0.99355	0.491		37.6457	9.91567	10
201284	71.34	0.99463	0.486		37.6773	9.92645	9.89817
201485	71.38	0.99552	0.486		37.6985	9.93533	9.89817
201685	71.5	0.99647	0.489		37.7618	9.94481	9.95927
201885	71.6	0.99734	0.487		37.8147	9.95349	9.91853
202086	71.64	0.99823	0.486		37.8358	9.96238	9.89817
202286	71.54	0.99946	0.485		37.783	9.97465	9.8778
202488	71.66	1.00032	0.483		37.8463	9.98323	9.83707
202689	71.74	1.00119	0.481		37.8886	9.99192	9.79633
202889	71.76	1.00228	0.48		37.8992	10.0028	9.77597
203090	71.84	1.00326	0.479		37.9414	10.0126	9.7556
203290	71.94	1.00412	0.479		37.9942	10.0212	9.7556
203490	72.02	1.00519	0.478		38.0365	10.0318	9.73523
203691	71.96	1.00611	0.479		38.0048	10.041	9.7556
203891	72.04	1.00709	0.473		38.047	10.0508	9.6334
204091	72.04	1.00819	0.476		38.047	10.0618	9.6945
204292	72.12	1.00906	0.472		38.0893	10.0705	9.61303
204492	72.18	1.01004	0.473		38.121	10.0802	9.6334
204693	72.16	1.01104	0.472		38.1104	10.0902	9.61303
204893	72.22	1.01202	0.47		38.1421	10.1	9.5723
205093	72.26	1.01301	0.468		38.1632	10.1099	9.53157
205294	72.34	1.01398	0.467		38.2055	10.1196	9.5112
205494	72.34	1.01508	0.461		38.2055	10.1305	9.389
205696	72.4	1.01596	0.463		38.2372	10.1393	9.42974
205897	72.42	1.01705	0.462		38.2477	10.1502	9.40937
206097	72.48	1.01803	0.463		38.2794	10.16	9.42974
206298	72.5	1.01893	0.461		38.29	10.169	9.389
206498	72.56	1.02	0.457		38.3217	10.1796	9.30754
206698	72.54	1.02101	0.459		38.3111	10.1897	9.34827
206899	72.64	1.02198	0.46		38.3639	10.1994	9.36864
207099	72.66	1.02287	0.456		38.3745	10.2083	9.28717
207299	72.74	1.02384	0.455		38.4167	10.218	9.2668
207500	72.78	1.02483	0.451		38.4379	10.2278	9.18534
207700	72.84	1.02581	0.454		38.4695	10.2376	9.24644
207901	72.82	1.02691	0.453		38.459	10.2486	9.22607
208101	72.78	1.02783	0.454		38.4379	10.2578	9.24644
208301	72.88	1.02889	0.452		38.4907	10.2684	9.2057
208502	72.96	1.02986	0.452		38.5329	10.278	9.2057
208702	72.94	1.03087	0.45		38.5224	10.2881	9.16497
208903	73.06	1.03183	0.448		38.5857	10.2977	9.12424
209103	73.14	1.0328	0.451		38.628	10.3074	9.18534
209303	73.06	1.03373	0.448		38.5857	10.3167	9.12424
209504	73.2	1.03468	0.448		38.6597	10.3261	9.12424
209704	73.22	1.03567	0.445		38.6702	10.336	9.06314
209906	73.36	1.03662	0.445		38.7442	10.3455	9.06314
210107	73.36	1.03792	0.449		38.7442	10.3585	9.1446
210307	73.5	1.03887	0.444		38.8181	10.368	9.04277
210508	73.46	1.03989	0.443		38.797	10.3781	9.0224
210708	73.48	1.04088	0.443		38.8076	10.388	9.0224
210908	73.48	1.04188	0.442		38.8076	10.398	9.00204
211109	73.62	1.04283	0.442		38.8815	10.4075	9.00204
211309	73.54	1.04376	0.441		38.8392	10.4168	8.98167
211509	73.58	1.04475	0.439		38.8604	10.4266	8.94094
211710	73.7	1.04571	0.441		38.9237	10.4362	8.98167
211910	73.76	1.04668	0.439		38.9554	10.4459	8.94094
212111	73.78	1.04758	0.437		38.966	10.4549	8.9002
212311	73.86	1.04865	0.436		39.0082	10.4656	8.87984
212511	73.84	1.04966	0.434		38.9977	10.4756	8.8391
212712	73.8	1.05067	0.435		38.9766	10.4857	8.85947
212912	73.82	1.05176	0.431		38.9871	10.4966	8.778
213114	73.9	1.05274	0.431		39.0294	10.5064	8.778
213315	73.94	1.05372	0.431		39.0505	10.5162	8.778
213515	73.96	1.05471	0.429		39.0611	10.526	8.73727
213716	73.96	1.05581	0.43		39.0611	10.537	8.75764
213916	74.04	1.05669	0.426		39.1033	10.5458	8.67617
214116	74.02	1.05759	0.426		39.0927	10.5548	8.67617
214317	74.12	1.05866	0.427		39.1456	10.5655	8.69654
214517	74.12	1.05966	0.423		39.1456	10.5754	8.61507
214717	74.2	1.06063	0.428		39.1878	10.5851	8.7169
214918	74.2	1.06153	0.425		39.1878	10.5941	8.6558
215118	74.28	1.0627	0.424		39.2301	10.6058	8.63544
215319	74.18	1.06364	0.423		39.1773	10.6152	8.61507
215519	74.28	1.0645	0.425		39.2301	10.6238	8.6558
215719	74.34	1.06548	0.422		39.2618	10.6335	8.5947
215920	74.26	1.06651	0.423		39.2195	10.6438	8.61507
216120	74.26	1.06781	0.421		39.2195	10.6568	8.57434
216322	74.2	1.06883	0.423		39.1878	10.667	8.61507
216523	74.2	1.06973	0.421		39.1878	10.6759	8.57434
216723	74.26	1.07061	0.424		39.2195	10.6847	8.63544
216924	74.32	1.07169	0.421		39.2512	10.6955	8.57434
217124	74.38	1.07267	0.419		39.2829	10.7053	8.5336
217324	74.5	1.07353	0.422		39.3463	10.7139	8.5947
217525	74.4	1.07466	0.417		39.2934	10.7251	8.49287
217725	74.38	1.07557	0.416		39.2829	10.7342	8.47251
217925	74.38	1.07647	0.417		39.2829	10.7432	8.49287
218126	74.42	1.07745	0.416		39.304	10.753	8.47251
218326	74.42	1.07845	0.416		39.304	10.763	8.47251
218527	74.56	1.0795	0.417		39.3779	10.7735	8.49287
218727	74.6	1.08029	0.413		39.3991	10.7813	8.41141
218927	74.72	1.08135	0.413		39.4624	10.7919	8.41141
219128	74.66	1.08247	0.413		39.4308	10.8031	8.41141
219328	74.7	1.08346	0.411		39.4519	10.813	8.37067
219530	74.7	1.08456	0.411		39.4519	10.824	8.37067
219731	74.72	1.08545	0.409		39.4624	10.8328	8.32994
219931	74.78	1.08653	0.412		39.4941	10.8436	8.39104
220132	74.76	1.08733	0.409		39.4836	10.8516	8.32994
220332	74.72	1.08845	0.41		39.4624	10.8628	8.35031
220532	74.9	1.08949	0.408		39.5575	10.8732	8.30957
220733	74.9	1.09039	0.404		39.5575	10.8821	8.22811
220933	74.96	1.09136	0.402		39.5892	10.8918	8.18737
221133	74.9	1.09249	0.401		39.5575	10.9031	8.16701
221334	74.88	1.09359	0.402		39.5469	10.9141	8.18737
221534	74.84	1.09461	0.401		39.5258	10.9243	8.16701
221735	74.9	1.09559	0.402		39.5575	10.934	8.18737
221935	75	1.09645	0.401		39.6103	10.9426	8.16701
222135	74.92	1.09738	0.402		39.5681	10.9519	8.18737
222336	74.92	1.09838	0.403		39.5681	10.9619	8.20774
222536	74.92	1.09938	0.401		39.5681	10.9719	8.16701
222738	75	1.10035	0.402		39.6103	10.9815	8.18737
222939	75.06	1.10133	0.4		39.642	10.9913	8.14664
223139	74.98	1.10236	0.399		39.5998	11.0016	8.12627
223340	75.1	1.10331	0.4		39.6631	11.0111	8.14664
223540	75.1	1.10431	0.4		39.6631	11.0211	8.14664
223740	75.06	1.10533	0.399		39.642	11.0312	8.12627
223941	75.06	1.10623	0.392		39.642	11.0402	7.98371
224141	75.18	1.10719	0.398		39.7054	11.0498	8.10591
224341	75.16	1.10829	0.397		39.6948	11.0608	8.08554
224542	75.16	1.10939	0.396		39.6948	11.0718	8.06517
224742	75.06	1.11043	0.395		39.642	11.0821	8.04481
224943	74.9	1.11199	0.393		39.5575	11.0977	8.00407
225143	74.84	1.11291	0.393		39.5258	11.1069	8.00407
225343	74.86	1.1137	0.393		39.5364	11.1148	8.00407
225544	74.8	1.11452	0.395		39.5047	11.123	8.04481
225744	74.78	1.11543	0.392		39.4941	11.132	7.98371
225946	74.86	1.1164	0.39		39.5364	11.1417	7.94297
226147	74.9	1.11739	0.394		39.5575	11.1516	8.02444
226347	74.94	1.11837	0.391		39.5786	11.1614	7.96334
226548	74.98	1.11926	0.391		39.5998	11.1703	7.96334
226748	74.96	1.12016	0.39		39.5892	11.1792	7.94297
226948	74.96	1.12116	0.393		39.5892	11.1892	8.00407
227149	75	1.12205	0.39		39.6103	11.1981	7.94297
227349	74.92	1.12308	0.387		39.5681	11.2084	7.88187
227549	75.02	1.12414	0.39		39.6209	11.219	7.94297
227750	75.14	1.1252	0.389		39.6843	11.2295	7.92261
227950	75.12	1.12621	0.386		39.6737	11.2396	7.86151
228151	75.18	1.12709	0.387		39.7054	11.2484	7.88187
228351	75.28	1.12815	0.385		39.7582	11.259	7.84114
228551	75.38	1.12912	0.388		39.811	11.2687	7.90224
228752	75.34	1.13023	0.387		39.7899	11.2797	7.88187
228952	75.38	1.13132	0.384		39.811	11.2906	7.82077
229153	75.4	1.13221	0.383		39.8216	11.2995	7.80041
229353	75.46	1.13319	0.383		39.8533	11.3093	7.80041
229553	75.54	1.13416	0.385		39.8955	11.319	7.84114
229754	75.6	1.13514	0.384		39.9272	11.3287	7.82077
229954	75.52	1.13617	0.383		39.885	11.339	7.80041
230156	75.54	1.13726	0.383		39.8955	11.3499	7.80041
230357	75.24	1.13837	0.383		39.7371	11.361	7.80041
230557	74.9	1.13949	0.383		39.5575	11.3722	7.80041
230758	74.72	1.14065	0.383		39.4624	11.3837	7.80041
230958	74.6	1.14169	0.377		39.3991	11.3941	7.67821
231158	74.5	1.14283	0.383		39.3463	11.4055	7.80041
231359	74.44	1.14395	0.379		39.3146	11.4167	7.71894
231559	74.44	1.14395	0.379		39.3146	11.4167	7.71894
231759	69.66	1.14922	0.383		36.7901	11.4693	7.80041
231960	69.82	1.14776	0.38		36.8746	11.4547	7.73931
232160	69.82	1.14776	0.38		36.8746	11.4547	7.73931
232361	69.82	1.14776	0.38		36.8746	11.4547	7.73931
232561	69.82	1.14776	0.38		36.8746	11.4547	7.73931
232761	69.82	1.14776	0.38		36.8746	11.4547	7.73931
232962	69.82	1.14776	0.38		36.8746	11.4547	7.73931
233162	69.82	1.14776	0.38		36.8746	11.4547	7.73931
233364	69.82	1.14776	0.38		36.8746	11.4547	7.73931
233565	69.82	1.14776	0.38		36.8746	11.4547	7.73931
233765	69.82	1.14776	0.38		36.8746	11.4547	7.73931
233966	69.82	1.14776	0.38		36.8746	11.4547	7.73931
234166	69.82	1.14776	0.38		36.8746	11.4547	7.73931
234366	69.82	1.14776	0.38		36.8746	11.4547	7.73931
234567	69.82	1.14776	0.38		36.8746	11.4547	7.73931
234767	69.52	1.16327	0.38		36.7161	11.6095	7.73931
234952	58.64	1.16288	0.388		30.97	11.6056	7.90224
234977	48.44	1.16645	0.398		25.583	11.6412	8.10591
235000	38.26	1.17001	0.412		20.2065	11.6767	8.39104
235088	26.94	1.17397	0.435		14.228	11.7163	8.85947
235111	26.94	1.17397	0.435		14.228	11.7163	8.85947
235311	19.62	1.17653	0.443		10.3621	11.7418	9.0224
235511	19.24	1.17667	0.438		10.1614	11.7432	8.92057
235712	19.24	1.17667	0.438		10.1614	11.7432	8.92057
235912	19.34	1.18723	0.437		10.2142	11.8486	8.9002
236114	19.64	1.18673	0.436		10.3726	11.8436	8.87984
236315	23.22	1.18577	0.433		12.2634	11.834	8.81874
236515	23.22	1.18577	0.433		12.2634	11.834	8.81874
236716	23.22	1.18577	0.433		12.2634	11.834	8.81874
236916	23.22	1.18577	0.433		12.2634	11.834	8.81874
237116	23.22	1.18577	0.433		12.2634	11.834	8.81874
237317	20.44	1.19405	0.431		10.7951	11.9167	8.778
237517	20.44	1.19405	0.431		10.7951	11.9167	8.778
237717	23.72	1.1927	0.434		12.5274	11.9032	8.8391
237918	23.72	1.1927	0.434		12.5274	11.9032	8.8391
238118	23.72	1.1927	0.434		12.5274	11.9032	8.8391
238319	23.72	1.1927	0.434		12.5274	11.9032	8.8391
238519	24.8	1.19602	0.43		13.0978	11.9363	8.75764

## Sheet: ZC-6-6
力(大)	--	位移	)结果报告
Time: 10:42:52,06/22/2019
diameter: 49.3	mm	height: 99.8	mm
Vertical 100kN force sensor (vertical force of test piece)
Control mode: force / confining pressure	waveform: slope
KN/s	Force end point: 11.540	KN	confining pressure rate: 0.500	MPa/s	confining pressure end point: 5.9760	MPa
time (ms)	vertical force (KN)	vertical deformation (mm)	confining pressure (MPa)		Stress (MPa)	axial strain	transverse strain
0	0	0	0		0	0	0
200	0	-0.0008	0		0	-0.00801603	0
400	0.16	-0.00076	0		0.0838178	-0.00761523	0
601	0.24	-0.00078	0.004		0.125727	-0.00781563	0.0811359
801	0.42	-0.00085	0.013		0.220022	-0.00851703	0.263692
1003	0.68	-0.00094	0.019		0.356226	-0.00941884	0.385396
1204	0.92	-0.00092	0.03		0.481952	-0.00921844	0.608519
1404	1.06	-0.00077	0.048		0.555293	-0.00771543	0.973631
1604	1.04	-0.00066	0.076		0.544816	-0.00661323	1.54158
1805	1.4	0.00021	0.1		0.733406	0.00210421	2.0284
2005	1.58	0.00055	0.152		0.827701	0.00551102	3.08316
2206	1.78	0.00128	0.207		0.932473	0.0128257	4.19878
2406	1.96	0.00321	0.258		1.02677	0.0321643	5.23327
2606	2.22	0.00442	0.31		1.16297	0.0442886	6.28803
2807	2.44	0.00615	0.355		1.27822	0.0616232	7.20081
3007	2.64	0.00858	0.393		1.38299	0.0859719	7.9716
3208	2.78	0.01143	0.417		1.45633	0.114529	8.45842
3408	3.02	0.01424	0.441		1.58206	0.142685	8.94523
3608	3.32	0.01744	0.457		1.73922	0.174749	9.26978
3809	3.56	0.02105	0.475		1.86495	0.210922	9.63489
4009	3.9	0.02463	0.495		2.04306	0.246794	10.0406
4211	3.92	0.02713	0.53		2.05354	0.271844	10.7505
4412	4.12	0.02876	0.577		2.15831	0.288176	11.7039
4612	4.32	0.02979	0.711		2.26308	0.298497	14.4219
4812	4.48	0.02983	1.284		2.3469	0.298898	26.0446
5013	4.76	0.02943	2.188		2.49358	0.29489	44.3813
5213	4.9	0.02948	2.385		2.56692	0.295391	48.3773
5414	5.06	0.02933	2.713		2.65074	0.293888	55.0304
5614	5.14	0.0293	2.777		2.69265	0.293587	56.3286
5814	5.42	0.0305	2.872		2.83933	0.305611	58.2556
6015	5.78	0.03538	2.972		3.02792	0.354509	60.284
6215	6.04	0.03919	3.071		3.16412	0.392685	62.2921
6416	6.16	0.04084	3.17		3.22699	0.409218	64.3002
6616	6.22	0.04162	3.27		3.25842	0.417034	66.3286
6816	6.38	0.04247	3.372		3.34223	0.425551	68.3976
7017	6.54	0.04461	3.469		3.42605	0.446994	70.3651
7217	6.94	0.04777	3.571		3.6356	0.478657	72.4341
7419	7.06	0.05113	3.675		3.69846	0.512325	74.5436
7620	7.42	0.0544	3.773		3.88705	0.54509	76.5314
7820	7.68	0.05721	3.873		4.02325	0.573246	78.5598
8020	7.66	0.05842	3.973		4.01278	0.585371	80.5882
8221	7.78	0.05908	4.073		4.07564	0.591984	82.6166
8421	7.94	0.06062	4.175		4.15946	0.607415	84.6856
8622	8.38	0.06447	4.273		4.38996	0.645992	86.6734
8822	8.64	0.06848	4.374		4.52616	0.686172	88.7221
9022	8.92	0.07208	4.475		4.67284	0.722244	90.7708
9223	8.8	0.07242	4.573		4.60998	0.725651	92.7586
9423	9.14	0.0727	4.676		4.78809	0.728457	94.8479
9624	9.36	0.07572	4.776		4.90334	0.758717	96.8763
9824	9.62	0.07853	4.876		5.03955	0.786874	98.9047
10024	9.82	0.08146	4.973		5.14432	0.816232	100.872
10225	10.06	0.08448	5.074		5.27004	0.846493	102.921
10425	10.28	0.0864	5.176		5.38529	0.865731	104.99
10627	10.28	0.0871	5.275		5.38529	0.872745	106.998
10828	10.38	0.08787	5.377		5.43768	0.880461	109.067
11028	10.5	0.08902	5.476		5.50054	0.891984	111.075
11228	11.02	0.09344	5.574		5.77295	0.936273	113.063
11429	11.44	0.0981	5.677		5.99297	0.982966	115.152
11629	11.3	0.09934	5.775		5.91963	0.995391	117.14
11830	11.38	0.09942	5.875		5.96154	0.996192	119.168
12030	11.54	0.10066	5.976		6.04536	1.00862	121.217
控制模式:围压	波形:斜坡
MPa/s	终点:6.0090	MPa
时间(ms)	垂直力(KN)	垂直变形(mm)	围压(MPa)
12180	11.94	0.10372	6.009		6.2549	1.03928	121.886
控制模式:位移	波形:斜坡
mm/s	终点:2.0791	mm
时间(ms)	垂直力(KN)	垂直变形(mm)	围压(MPa)
12198	11.94	0.10372	6.008		6.2549	1.03928	121.866
12398	10.14	0.10505	5.982		5.31195	1.05261	121.339
12599	10	0.105	5.987		5.23861	1.0521	121.44
12799	10	0.105	5.987		5.23861	1.0521	121.44
12999	10	0.105	5.987		5.23861	1.0521	121.44
13201	10	0.105	5.987		5.23861	1.0521	121.44
13402	10	0.105	5.987		5.23861	1.0521	121.44
13603	10	0.105	5.987		5.23861	1.0521	121.44
13803	10.1	0.11236	5.985		5.291	1.12585	121.4
14003	10.56	0.1118	5.985		5.53197	1.12024	121.4
14203	10.56	0.1118	5.985		5.53197	1.12024	121.4
14404	10.56	0.1118	5.985		5.53197	1.12024	121.4
14604	10.56	0.1118	5.985		5.53197	1.12024	121.4
14805	10.56	0.1118	5.985		5.53197	1.12024	121.4
15005	10.56	0.1118	5.985		5.53197	1.12024	121.4
15205	10.32	0.11879	5.984		5.40625	1.19028	121.379
15406	11.62	0.11843	5.987		6.08727	1.18667	121.44
15606	11.32	0.12104	5.984		5.93011	1.21283	121.379
15807	11.32	0.12104	5.984		5.93011	1.21283	121.379
16007	11.32	0.12104	5.984		5.93011	1.21283	121.379
16207	11.32	0.12104	5.984		5.93011	1.21283	121.379
16409	11.32	0.12104	5.984		5.93011	1.21283	121.379
16610	11.32	0.12104	5.984		5.93011	1.21283	121.379
16811	11.74	0.12549	5.983		6.15013	1.25741	121.359
17011	11.48	0.12818	5.985		6.01393	1.28437	121.4
17211	11.1	0.12761	5.985		5.81486	1.27866	121.4
17411	11.1	0.12761	5.985		5.81486	1.27866	121.4
17612	11.1	0.12761	5.985		5.81486	1.27866	121.4
17812	11.1	0.12761	5.985		5.81486	1.27866	121.4
18013	11.28	0.13255	5.983		5.90915	1.32816	121.359
18213	12.1	0.13216	5.983		6.33872	1.32425	121.359
18413	12.48	0.13493	5.983		6.53779	1.352	121.359
18614	12.48	0.13493	5.983		6.53779	1.352	121.359
18814	12.48	0.13493	5.983		6.53779	1.352	121.359
19015	12.48	0.13493	5.983		6.53779	1.352	121.359
19215	12.48	0.13493	5.983		6.53779	1.352	121.359
19415	12.48	0.13493	5.983		6.53779	1.352	121.359
19617	12.66	0.13897	5.985		6.63208	1.39248	121.4
19818	12.98	0.14176	5.985		6.79972	1.42044	121.4
20019	12.98	0.14176	5.985		6.79972	1.42044	121.4
20219	12.98	0.14176	5.985		6.79972	1.42044	121.4
20419	12.98	0.14176	5.985		6.79972	1.42044	121.4
20619	13.4	0.14371	5.982		7.01974	1.43998	121.339
20820	12.34	0.14678	5.983		6.46445	1.47074	121.359
21020	12.48	0.14613	5.985		6.53779	1.46423	121.4
21221	12.48	0.14613	5.985		6.53779	1.46423	121.4
21421	12.48	0.14613	5.985		6.53779	1.46423	121.4
21621	12.48	0.14613	5.985		6.53779	1.46423	121.4
21822	12.48	0.14613	5.985		6.53779	1.46423	121.4
22022	12.48	0.14613	5.985		6.53779	1.46423	121.4
22223	12.36	0.15277	5.986		6.47493	1.53076	121.42
22423	12.36	0.15277	5.986		6.47493	1.53076	121.42
22623	12.64	0.15508	5.984		6.62161	1.55391	121.379
22825	13.96	0.15461	5.988		7.3131	1.5492	121.46
23026	13.52	0.15727	5.983		7.0826	1.57585	121.359
23227	13.52	0.15727	5.983		7.0826	1.57585	121.359
23427	13.52	0.15727	5.983		7.0826	1.57585	121.359
23627	13.52	0.15727	5.983		7.0826	1.57585	121.359
23827	13.52	0.15727	5.983		7.0826	1.57585	121.359
24028	13.22	0.16197	5.987		6.92545	1.62295	121.44
24228	14.1	0.16166	5.986		7.38644	1.61984	121.42
24429	14.28	0.1642	5.984		7.48074	1.64529	121.379
24629	14.28	0.1642	5.984		7.48074	1.64529	121.379
24829	14.28	0.1642	5.984		7.48074	1.64529	121.379
25030	14.28	0.1642	5.984		7.48074	1.64529	121.379
25230	14.28	0.1642	5.984		7.48074	1.64529	121.379
25431	14.28	0.1642	5.984		7.48074	1.64529	121.379
25631	14.28	0.1642	5.984		7.48074	1.64529	121.379
25831	14.28	0.1642	5.984		7.48074	1.64529	121.379
26033	14.74	0.17034	5.985		7.72171	1.70681	121.4
26234	14.7	0.17315	5.985		7.70076	1.73497	121.4
26435	14.7	0.17315	5.985		7.70076	1.73497	121.4
26635	14.7	0.17315	5.985		7.70076	1.73497	121.4
26835	14.7	0.17315	5.985		7.70076	1.73497	121.4
27035	14.7	0.17315	5.985		7.70076	1.73497	121.4
27236	14.7	0.17315	5.985		7.70076	1.73497	121.4
27436	14.7	0.17315	5.985		7.70076	1.73497	121.4
27637	14.34	0.17968	5.987		7.51217	1.8004	121.44
27837	15.48	0.17908	5.986		8.10937	1.79439	121.42
28037	15.04	0.18174	5.983		7.87887	1.82104	121.359
28238	14.82	0.18161	5.986		7.76362	1.81974	121.42
28438	14.82	0.18161	5.986		7.76362	1.81974	121.42
28639	14.4	0.18396	5.985		7.5436	1.84329	121.4
28839	14.4	0.18396	5.985		7.5436	1.84329	121.4
29039	14.54	0.18651	5.984		7.61694	1.86884	121.379
29241	14.54	0.18651	5.984		7.61694	1.86884	121.379
29442	15.22	0.18867	5.987		7.97317	1.89048	121.44
29643	15.58	0.18825	5.984		8.16176	1.88627	121.379
29843	15.58	0.18825	5.984		8.16176	1.88627	121.379
30043	15.58	0.18825	5.984		8.16176	1.88627	121.379
30243	15.58	0.18825	5.984		8.16176	1.88627	121.379
30444	15.58	0.18825	5.984		8.16176	1.88627	121.379
30645	15.58	0.18825	5.984		8.16176	1.88627	121.379
30845	15.82	0.19536	5.983		8.28749	1.95752	121.359
31045	16.26	0.19491	5.987		8.51798	1.95301	121.44
31245	16.26	0.19491	5.987		8.51798	1.95301	121.44
31446	16.26	0.19491	5.987		8.51798	1.95301	121.44
31646	16.26	0.19491	5.987		8.51798	1.95301	121.44
31847	16.26	0.19491	5.987		8.51798	1.95301	121.44
32047	16.26	0.19491	5.987		8.51798	1.95301	121.44
32247	16.14	0.20195	5.984		8.45512	2.02355	121.379
32448	17.42	0.2017	5.984		9.12566	2.02104	121.379
32648	17.16	0.20389	5.986		8.98946	2.04299	121.42
32849	17.16	0.20389	5.986		8.98946	2.04299	121.42
33049	17.16	0.20389	5.986		8.98946	2.04299	121.42
33249	17.16	0.20389	5.986		8.98946	2.04299	121.42
33451	17.16	0.20389	5.986		8.98946	2.04299	121.42
33652	17.16	0.20389	5.986		8.98946	2.04299	121.42
33853	17.16	0.20389	5.986		8.98946	2.04299	121.42
34053	16.74	0.21094	5.982		8.76944	2.11363	121.339
34253	17.22	0.21047	5.986		9.02089	2.10892	121.42
34453	17.6	0.21304	5.983		9.21996	2.13467	121.359
34654	17.6	0.21304	5.983		9.21996	2.13467	121.359
34854	17.6	0.21304	5.983		9.21996	2.13467	121.359
35055	17.6	0.21304	5.983		9.21996	2.13467	121.359
35255	17.6	0.21304	5.983		9.21996	2.13467	121.359
35455	17.6	0.21304	5.983		9.21996	2.13467	121.359
35656	17.6	0.21304	5.983		9.21996	2.13467	121.359
35856	17.46	0.21979	5.982		9.14662	2.2023	121.339
36057	18.1	0.21926	5.984		9.48189	2.19699	121.379
36257	18.52	0.22172	5.985		9.70191	2.22164	121.4
36457	18.52	0.22172	5.985		9.70191	2.22164	121.4
36659	18.52	0.22172	5.985		9.70191	2.22164	121.4
36860	18.52	0.22172	5.985		9.70191	2.22164	121.4
37061	18.52	0.22172	5.985		9.70191	2.22164	121.4
37261	18.52	0.22172	5.985		9.70191	2.22164	121.4
37461	18.74	0.22604	5.985		9.81716	2.26493	121.4
37661	18.46	0.22864	5.987		9.67048	2.29098	121.44
37862	18.2	0.22833	5.986		9.53427	2.28788	121.42
38062	18.2	0.22833	5.986		9.53427	2.28788	121.42
38263	18.2	0.22833	5.986		9.53427	2.28788	121.42
38463	18.2	0.22833	5.986		9.53427	2.28788	121.42
38663	18.36	0.23307	5.982		9.61809	2.33537	121.339
38864	18.36	0.23307	5.982		9.61809	2.33537	121.339
39064	18.86	0.2355	5.981		9.88002	2.35972	121.318
39265	18.86	0.2351	5.989		9.88002	2.35571	121.481
39465	18.86	0.2351	5.989		9.88002	2.35571	121.481
39665	18.86	0.2351	5.989		9.88002	2.35571	121.481
39867	18.86	0.2351	5.989		9.88002	2.35571	121.481
40068	18.38	0.23987	5.982		9.62857	2.40351	121.339
40269	18.38	0.23987	5.982		9.62857	2.40351	121.339
40469	18.7	0.24205	5.984		9.79621	2.42535	121.379
40669	18.7	0.24205	5.984		9.79621	2.42535	121.379
40869	19.56	0.24415	5.984		10.2467	2.44639	121.379
41070	19.76	0.24378	5.986		10.3515	2.44269	121.42
41270	20.2	0.24633	5.985		10.582	2.46824	121.4
41471	20.2	0.24633	5.985		10.582	2.46824	121.4
41671	20.2	0.24633	5.985		10.582	2.46824	121.4
41871	20.2	0.24633	5.985		10.582	2.46824	121.4
42072	20.2	0.24633	5.985		10.582	2.46824	121.4
42272	19.88	0.25094	5.984		10.4144	2.51443	121.379
42473	20.64	0.25058	5.987		10.8125	2.51082	121.44
42673	20.76	0.25303	5.983		10.8754	2.53537	121.359
42873	20.76	0.25303	5.983		10.8754	2.53537	121.359
43075	20.76	0.25303	5.983		10.8754	2.53537	121.359
43276	20.76	0.25303	5.983		10.8754	2.53537	121.359
43477	21.32	0.25514	5.984		11.1687	2.55651	121.379
43677	20.86	0.2577	5.986		10.9277	2.58216	121.42
43877	20.46	0.25764	5.984		10.7182	2.58156	121.379
44077	20.46	0.25764	5.984		10.7182	2.58156	121.379
44278	20.46	0.25764	5.984		10.7182	2.58156	121.379
44478	20.46	0.25764	5.984		10.7182	2.58156	121.379
44679	20.22	0.26242	5.983		10.5925	2.62946	121.359
44879	20.22	0.26242	5.983		10.5925	2.62946	121.359
45079	21.04	0.26464	5.983		11.022	2.6517	121.359
45280	20.9	0.26458	5.985		10.9487	2.6511	121.4
45480	20.9	0.26458	5.985		10.9487	2.6511	121.4
45681	20.76	0.26683	5.986		10.8754	2.67365	121.42
45881	20.76	0.26683	5.986		10.8754	2.67365	121.42
46081	20.74	0.26914	5.985		10.8649	2.69679	121.4
46283	20.74	0.26914	5.985		10.8649	2.69679	121.4
46484	21.68	0.27141	5.979		11.3573	2.71954	121.278
46685	21.8	0.27127	5.987		11.4202	2.71814	121.44
46885	21.8	0.27127	5.987		11.4202	2.71814	121.44
47085	21.8	0.27127	5.987		11.4202	2.71814	121.44
47285	21.8	0.27127	5.987		11.4202	2.71814	121.44
47486	21.42	0.2762	5.979		11.2211	2.76754	121.278
47686	22.48	0.27583	5.986		11.7764	2.76383	121.42
47887	22.52	0.27832	5.985		11.7974	2.78878	121.4
48087	22.52	0.27832	5.985		11.7974	2.78878	121.4
48287	22.52	0.27832	5.985		11.7974	2.78878	121.4
48488	22.52	0.27832	5.985		11.7974	2.78878	121.4
48688	22.52	0.27832	5.985		11.7974	2.78878	121.4
48889	22.52	0.27832	5.985		11.7974	2.78878	121.4
49089	22.94	0.28267	5.986		12.0174	2.83236	121.42
49289	22.88	0.28519	5.987		11.9859	2.85762	121.44
49491	22.42	0.28505	5.983		11.745	2.85621	121.359
49692	22.42	0.28505	5.983		11.745	2.85621	121.359
49893	22.18	0.28764	5.983		11.6192	2.88216	121.359
50093	22.18	0.28764	5.983		11.6192	2.88216	121.359
50293	23.14	0.2899	5.984		12.1221	2.90481	121.379
50493	23	0.28985	5.983		12.0488	2.90431	121.359
50694	23	0.28985	5.983		12.0488	2.90431	121.359
50895	23	0.28985	5.983		12.0488	2.90431	121.359
51095	23	0.28985	5.983		12.0488	2.90431	121.359
51295	22.74	0.29464	5.983		11.9126	2.9523	121.359
51495	24.02	0.29419	5.984		12.5831	2.9478	121.379
51696	23.52	0.29697	5.982		12.3212	2.97565	121.339
51896	23.52	0.29697	5.982		12.3212	2.97565	121.339
52097	23.52	0.29697	5.982		12.3212	2.97565	121.339
52297	23.52	0.29697	5.982		12.3212	2.97565	121.339
52497	23.52	0.29697	5.982		12.3212	2.97565	121.339
52698	23.44	0.3018	5.984		12.2793	3.02405	121.379
52898	23.62	0.30153	5.985		12.3736	3.02134	121.4
53099	23.62	0.30153	5.985		12.3736	3.02134	121.4
53299	23.66	0.30392	5.982		12.3946	3.04529	121.339
53499	23.66	0.30392	5.982		12.3946	3.04529	121.339
53701	23.94	0.30632	5.986		12.5412	3.06934	121.42
53902	24.78	0.30593	5.986		12.9813	3.06543	121.42
54103	24.62	0.30848	5.982		12.8975	3.09098	121.339
54303	24.12	0.30856	5.984		12.6355	3.09178	121.379
54503	24.12	0.30856	5.984		12.6355	3.09178	121.379
54703	23.78	0.31098	5.985		12.4574	3.11603	121.4
54904	23.78	0.31098	5.985		12.4574	3.11603	121.4
55104	24.18	0.31334	5.983		12.667	3.13968	121.359
55305	24.18	0.31334	5.983		12.667	3.13968	121.359
55505	24.88	0.31569	5.983		13.0337	3.16323	121.359
55705	24.42	0.31545	5.986		12.7927	3.16082	121.42
55906	24.42	0.31545	5.986		12.7927	3.16082	121.42
56106	24.54	0.31791	5.984		12.8556	3.18547	121.379
56307	24.54	0.31791	5.984		12.8556	3.18547	121.379
56507	24.82	0.32001	5.984		13.0022	3.20651	121.379
56707	25.84	0.31966	5.987		13.5366	3.20301	121.44
56909	25.64	0.32223	5.981		13.4318	3.22876	121.318
57110	25.16	0.32209	5.986		13.1803	3.22735	121.42
57311	25.16	0.32209	5.986		13.1803	3.22735	121.42
57511	24.72	0.32455	5.984		12.9499	3.252	121.379
57711	24.72	0.32455	5.984		12.9499	3.252	121.379
57911	25.72	0.3267	5.987		13.4737	3.27355	121.44
58112	25.72	0.3267	5.987		13.4737	3.27355	121.44
58312	26.1	0.32896	5.983		13.6728	3.29619	121.359
58513	25.88	0.32894	5.985		13.5575	3.29599	121.4
58713	25.88	0.32894	5.985		13.5575	3.29599	121.4
58913	25.44	0.3313	5.986		13.327	3.31964	121.42
59114	25.44	0.3313	5.986		13.327	3.31964	121.42
59314	25.42	0.3338	5.982		13.3166	3.34469	121.339
59515	27.06	0.33333	5.986		14.1757	3.33998	121.42
59715	27.12	0.33591	5.985		14.2071	3.36583	121.4
59915	27.12	0.33591	5.985		14.2071	3.36583	121.4
60117	27.12	0.33591	5.985		14.2071	3.36583	121.4
60318	27.12	0.33591	5.985		14.2071	3.36583	121.4
60519	27.12	0.33591	5.985		14.2071	3.36583	121.4
60719	26.68	0.34056	5.985		13.9766	3.41242	121.4
60919	27.2	0.34038	5.985		14.249	3.41062	121.4
61119	27.2	0.34038	5.985		14.249	3.41062	121.4
61320	27.02	0.34284	5.985		14.1547	3.43527	121.4
61520	27.02	0.34284	5.985		14.1547	3.43527	121.4
61721	26.84	0.34521	5.985		14.0604	3.45902	121.4
61921	26.84	0.34521	5.985		14.0604	3.45902	121.4
62121	27.18	0.34759	5.981		14.2385	3.48287	121.318
62322	27.1	0.34742	5.984		14.1966	3.48116	121.379
62522	27.1	0.34742	5.984		14.1966	3.48116	121.379
62723	26.76	0.34993	5.988		14.0185	3.50631	121.46
62923	26.76	0.34993	5.988		14.0185	3.50631	121.46
63123	27.4	0.35231	5.983		14.3538	3.53016	121.359
63325	27.66	0.35222	5.982		14.49	3.52926	121.339
63526	27.66	0.35222	5.982		14.49	3.52926	121.339
63727	27.66	0.35222	5.982		14.49	3.52926	121.339
63927	27.66	0.35222	5.982		14.49	3.52926	121.339
64127	27.56	0.35705	5.983		14.4376	3.57766	121.359
64327	28.3	0.35679	5.985		14.8253	3.57505	121.4
64528	28.6	0.35929	5.982		14.9824	3.6001	121.339
64728	28.6	0.35929	5.982		14.9824	3.6001	121.339
64929	28.6	0.35929	5.982		14.9824	3.6001	121.339
65129	28.6	0.35929	5.982		14.9824	3.6001	121.339
65329	28.6	0.35929	5.982		14.9824	3.6001	121.339
65530	28.24	0.36412	5.981		14.7938	3.6485	121.318
65730	28.52	0.36392	5.983		14.9405	3.64649	121.359
65931	28.52	0.36392	5.983		14.9405	3.64649	121.359
66131	28.52	0.36392	5.983		14.9405	3.64649	121.359
66331	28.52	0.36392	5.983		14.9405	3.64649	121.359
66533	28.1	0.36896	5.985		14.7205	3.69699	121.4
66734	29.24	0.36857	5.989		15.3177	3.69309	121.481
66935	29.36	0.37102	5.984		15.3806	3.71764	121.379
67135	29.36	0.37102	5.984		15.3806	3.71764	121.379
67335	29.36	0.37102	5.984		15.3806	3.71764	121.379
67535	29.36	0.37102	5.984		15.3806	3.71764	121.379
67736	29.36	0.37102	5.984		15.3806	3.71764	121.379
67936	29.36	0.37542	5.987		15.3806	3.76172	121.44
68137	29.36	0.37542	5.987		15.3806	3.76172	121.44
68337	29.46	0.37769	5.982		15.433	3.78447	121.339
68537	29.8	0.37747	5.985		15.6111	3.78226	121.4
68738	29.74	0.37989	5.982		15.5796	3.80651	121.339
68938	29.74	0.37989	5.982		15.5796	3.80651	121.339
69139	29.74	0.37989	5.982		15.5796	3.80651	121.339
69339	29.74	0.37989	5.982		15.5796	3.80651	121.339
69539	29.74	0.37989	5.982		15.5796	3.80651	121.339
69741	29.46	0.38419	5.979		15.433	3.8496	121.278
69942	29.46	0.38419	5.979		15.433	3.8496	121.278
70143	30.08	0.38637	5.979		15.7577	3.87144	121.278
70343	30.9	0.38609	5.986		16.1873	3.86864	121.42
70543	30.58	0.3886	5.984		16.0197	3.89379	121.379
70743	30.4	0.38836	5.987		15.9254	3.89138	121.44
70944	30.4	0.38836	5.987		15.9254	3.89138	121.44
71145	30.4	0.38836	5.987		15.9254	3.89138	121.44
71345	30.4	0.38836	5.987		15.9254	3.89138	121.44
71545	30.06	0.39328	5.983		15.7473	3.94068	121.359
71745	31.4	0.39281	5.985		16.4492	3.93597	121.4
71946	31.08	0.39542	5.984		16.2816	3.96212	121.379
72146	31.08	0.39542	5.984		16.2816	3.96212	121.379
72347	31.08	0.39542	5.984		16.2816	3.96212	121.379
72547	31.08	0.39542	5.984		16.2816	3.96212	121.379
72747	31.08	0.39542	5.984		16.2816	3.96212	121.379
72948	31.14	0.3998	5.983		16.313	4.00601	121.359
73148	32.16	0.39954	5.987		16.8474	4.00341	121.44
73349	31.9	0.40194	5.985		16.7112	4.02745	121.4
73549	31.64	0.40173	5.982		16.575	4.02535	121.339
73749	31.64	0.40173	5.982		16.575	4.02535	121.339
73951	31.64	0.40173	5.982		16.575	4.02535	121.339
74152	31.64	0.40173	5.982		16.575	4.02535	121.339
74353	31.74	0.40679	5.981		16.6274	4.07605	121.318
74553	32.08	0.40667	5.985		16.8055	4.07485	121.4
74753	32.52	0.40902	5.984		17.036	4.0984	121.379
74953	32.52	0.40902	5.984		17.036	4.0984	121.379
75154	32.52	0.40902	5.984		17.036	4.0984	121.379
75354	32.52	0.40902	5.984		17.036	4.0984	121.379
75555	32.58	0.4114	5.985		17.0674	4.12224	121.4
75755	32.58	0.4114	5.985		17.0674	4.12224	121.4
75955	32.58	0.4114	5.985		17.0674	4.12224	121.4
76156	32.58	0.4114	5.985		17.0674	4.12224	121.4
76356	32.58	0.4114	5.985		17.0674	4.12224	121.4
76557	32.92	0.41638	5.987		17.2455	4.17214	121.44
76757	32.78	0.41893	5.982		17.1722	4.1977	121.339
76957	32.78	0.41893	5.982		17.1722	4.1977	121.339
77159	32.78	0.41893	5.982		17.1722	4.1977	121.339
77360	32.78	0.41893	5.982		17.1722	4.1977	121.339
77561	32.78	0.41893	5.982		17.1722	4.1977	121.339
77761	32.66	0.42337	5.98		17.1093	4.24218	121.298
77961	33.46	0.42309	5.984		17.5284	4.23938	121.379
78161	33.26	0.42596	5.983		17.4236	4.26814	121.359
78362	33.26	0.42596	5.983		17.4236	4.26814	121.359
78562	33.26	0.42596	5.983		17.4236	4.26814	121.359
78763	33.24	0.42797	5.985		17.4131	4.28828	121.4
78963	33.24	0.42797	5.985		17.4131	4.28828	121.4
79163	33.62	0.43033	5.982		17.6122	4.31192	121.339
79364	33.54	0.43026	5.985		17.5703	4.31122	121.4
79564	33.54	0.43026	5.985		17.5703	4.31122	121.4
79765	33.54	0.43026	5.985		17.5703	4.31122	121.4
79965	33.54	0.43026	5.985		17.5703	4.31122	121.4
80165	33.14	0.4351	5.985		17.3608	4.35972	121.4
80367	33.14	0.4351	5.985		17.3608	4.35972	121.4
80568	33.6	0.43724	5.981		17.6017	4.38116	121.318
80769	34.36	0.43687	5.986		17.9999	4.37745	121.42
80969	34.42	0.43915	5.983		18.0313	4.4003	121.359
81169	34.42	0.43895	5.986		18.0313	4.3983	121.42
81369	34.7	0.44125	5.984		18.178	4.42134	121.379
81570	34.7	0.44125	5.984		18.178	4.42134	121.379
81770	34.7	0.44125	5.984		18.178	4.42134	121.379
81971	34.48	0.44353	5.983		18.0627	4.44419	121.359
82171	34.48	0.44353	5.983		18.0627	4.44419	121.359
82371	34.24	0.44602	5.983		17.937	4.46914	121.359
82572	35.1	0.44581	5.989		18.3875	4.46703	121.481
82772	35.14	0.4482	5.981		18.4085	4.49098	121.318
82973	35.14	0.4482	5.981		18.4085	4.49098	121.318
83173	35.14	0.4482	5.981		18.4085	4.49098	121.318
83373	34.76	0.45043	5.983		18.2094	4.51333	121.359
83575	34.76	0.45043	5.983		18.2094	4.51333	121.359
83776	35	0.45275	5.985		18.3351	4.53657	121.4
83977	35.52	0.45257	5.987		18.6076	4.53477	121.44
84177	35.52	0.45257	5.987		18.6076	4.53477	121.44
84377	35.52	0.45257	5.987		18.6076	4.53477	121.44
84577	35.52	0.45257	5.987		18.6076	4.53477	121.44
84778	35.1	0.45752	5.983		18.3875	4.58437	121.359
84978	35.1	0.45752	5.983		18.3875	4.58437	121.359
85179	35.64	0.45983	5.985		18.6704	4.60752	121.4
85379	35.66	0.45952	5.985		18.6809	4.60441	121.4
85579	35.66	0.45952	5.985		18.6809	4.60441	121.4
85780	35.8	0.46197	5.983		18.7542	4.62896	121.359
85980	35.8	0.46197	5.983		18.7542	4.62896	121.359
86181	36.12	0.46436	5.981		18.9219	4.65291	121.318
86381	36.82	0.46411	5.985		19.2886	4.6504	121.4
86581	36.9	0.46648	5.985		19.3305	4.67415	121.4
86783	36.9	0.46648	5.985		19.3305	4.67415	121.4
86984	36.9	0.46648	5.985		19.3305	4.67415	121.4
87185	36.7	0.46895	5.986		19.2257	4.6989	121.42
87385	37.14	0.4689	5.986		19.4562	4.6984	121.42
87585	37.58	0.47155	5.985		19.6867	4.72495	121.4
87785	37.58	0.47155	5.985		19.6867	4.72495	121.4
87986	38.04	0.47209	5.987		19.9277	4.73036	121.44
88186	38.04	0.47209	5.987		19.9277	4.73036	121.44
88387	37.68	0.47381	5.986		19.7391	4.7476	121.42
88587	37.84	0.47616	5.985		19.8229	4.77114	121.4
88787	37.84	0.47616	5.985		19.8229	4.77114	121.4
88988	37.84	0.47616	5.985		19.8229	4.77114	121.4
89188	37.84	0.47616	5.985		19.8229	4.77114	121.4
89389	37.6	0.47874	5.986		19.6972	4.79699	121.42
89589	37.6	0.47874	5.986		19.6972	4.79699	121.42
89789	37.6	0.47874	5.986		19.6972	4.79699	121.42
89991	37.6	0.47874	5.986		19.6972	4.79699	121.42
90192	37.72	0.4837	5.982		19.76	4.84669	121.339
90393	38.22	0.48352	5.982		20.022	4.84489	121.339
90593	38.22	0.48352	5.982		20.022	4.84489	121.339
90793	38.22	0.48352	5.982		20.022	4.84489	121.339
90993	38.22	0.48352	5.982		20.022	4.84489	121.339
91194	38.02	0.48859	5.983		19.9172	4.89569	121.359
91395	38.1	0.48866	5.985		19.9591	4.89639	121.4
91595	38.1	0.48866	5.985		19.9591	4.89639	121.4
91795	37.6	0.49134	5.985		19.6972	4.92325	121.4
91995	37.6	0.49134	5.985		19.6972	4.92325	121.4
92196	37.6	0.49134	5.985		19.6972	4.92325	121.4
92396	37.7	0.494	5.987		19.7496	4.9499	121.44
92597	37.7	0.494	5.987		19.7496	4.9499	121.44
92797	38.5	0.49622	5.983		20.1687	4.97214	121.359
92997	38.5	0.49622	5.983		20.1687	4.97214	121.359
93198	38.76	0.49873	5.983		20.3049	4.99729	121.359
93398	38.3	0.49869	5.985		20.0639	4.99689	121.4
93599	38.3	0.49869	5.985		20.0639	4.99689	121.4
93799	38.3	0.50109	5.986		20.0639	5.02094	121.42
93999	38.3	0.50109	5.986		20.0639	5.02094	121.42
94201	39.02	0.50354	5.983		20.4411	5.04549	121.359
94402	39.18	0.50339	5.987		20.5249	5.04399	121.44
94603	39.18	0.50339	5.987		20.5249	5.04399	121.44
94803	38.84	0.50601	5.983		20.3468	5.07024	121.359
95003	38.84	0.50601	5.983		20.3468	5.07024	121.359
95203	39.42	0.5083	5.984		20.6506	5.09319	121.379
95404	39.74	0.50799	5.989		20.8182	5.09008	121.481
95604	40.18	0.51064	5.985		21.0487	5.11663	121.4
95805	40.18	0.51064	5.985		21.0487	5.11663	121.4
96005	40.18	0.51064	5.985		21.0487	5.11663	121.4
96205	40.18	0.51064	5.985		21.0487	5.11663	121.4
96406	40.56	0.5128	5.982		21.2478	5.13828	121.339
96606	40.18	0.51534	5.983		21.0487	5.16373	121.359
96807	40.18	0.51534	5.983		21.0487	5.16373	121.359
97007	40.18	0.51534	5.983		21.0487	5.16373	121.359
97207	39.78	0.51778	5.982		20.8392	5.18818	121.339
97409	39.78	0.51778	5.982		20.8392	5.18818	121.339
97610	39.78	0.51778	5.982		20.8392	5.18818	121.339
97811	40.16	0.52014	5.985		21.0383	5.21182	121.4
98011	40.16	0.52014	5.985		21.0383	5.21182	121.4
98211	39.86	0.52275	5.984		20.8811	5.23798	121.379
98411	41.24	0.52247	5.982		21.604	5.23517	121.339
98612	41.02	0.52504	5.983		21.4888	5.26092	121.359
98812	41.02	0.52504	5.983		21.4888	5.26092	121.359
99013	41.02	0.52504	5.983		21.4888	5.26092	121.359
99213	40.84	0.52761	5.983		21.3945	5.28667	121.359
99413	41.54	0.52736	5.986		21.7612	5.28417	121.42
99614	41.88	0.53004	5.983		21.9393	5.31102	121.359
99814	41.88	0.53004	5.983		21.9393	5.31102	121.359
100015	42.38	0.53067	5.987		22.2012	5.31733	121.44
100215	41.52	0.53287	5.983		21.7507	5.33938	121.359
100415	41.28	0.53285	5.983		21.625	5.33918	121.359
100617	41.28	0.53285	5.983		21.625	5.33918	121.359
100818	41.1	0.53532	5.982		21.5307	5.36393	121.339
101019	41.1	0.53532	5.982		21.5307	5.36393	121.339
101219	41.66	0.53772	5.982		21.8241	5.38798	121.339
101419	41.56	0.53765	5.982		21.7717	5.38727	121.339
101619	41.56	0.53765	5.982		21.7717	5.38727	121.339
101820	41.16	0.54029	5.987		21.5621	5.41373	121.44
102020	41.16	0.54029	5.987		21.5621	5.41373	121.44
102221	42.24	0.54252	5.981		22.1279	5.43607	121.318
102421	42.16	0.54244	5.985		22.086	5.43527	121.4
102621	42.16	0.54244	5.985		22.086	5.43527	121.4
102822	42.14	0.54485	5.983		22.0755	5.45942	121.359
103022	43.32	0.54474	5.985		22.6937	5.45832	121.4
103223	42.86	0.5475	5.983		22.4527	5.48597	121.359
103423	42.86	0.5475	5.983		22.4527	5.48597	121.359
103623	42.86	0.5475	5.983		22.4527	5.48597	121.359
103825	42.78	0.54993	5.986		22.4108	5.51032	121.42
104026	43.26	0.54986	5.986		22.6622	5.50962	121.42
104227	43.26	0.54986	5.986		22.6622	5.50962	121.42
104427	43.26	0.54986	5.986		22.6622	5.50962	121.42
104627	43.26	0.54986	5.986		22.6622	5.50962	121.42
104827	43.28	0.55525	5.984		22.6727	5.56363	121.379
105028	43.28	0.55525	5.984		22.6727	5.56363	121.379
105228	43.28	0.55525	5.984		22.6727	5.56363	121.379
105429	43.28	0.55525	5.984		22.6727	5.56363	121.379
105629	43.88	0.55764	5.987		22.987	5.58758	121.44
105829	43.78	0.56018	5.982		22.9346	5.61303	121.339
106030	43.78	0.56018	5.982		22.9346	5.61303	121.339
106230	43.78	0.56018	5.982		22.9346	5.61303	121.339
106431	43.42	0.5628	5.983		22.7461	5.63928	121.359
106631	44.36	0.56247	5.982		23.2385	5.63597	121.339
106831	44.6	0.56509	5.985		23.3642	5.66222	121.4
107033	44.6	0.56509	5.985		23.3642	5.66222	121.4
107234	45.08	0.56582	5.986		23.6157	5.66954	121.42
107435	44.04	0.56769	5.983		23.0708	5.68828	121.359
107635	44.2	0.56763	5.983		23.1547	5.68768	121.359
107835	44.2	0.56763	5.983		23.1547	5.68768	121.359
108035	44.2	0.56763	5.983		23.1547	5.68768	121.359
108236	44.2	0.56763	5.983		23.1547	5.68768	121.359
108436	44	0.5727	5.984		23.0499	5.73848	121.379
108637	44.72	0.57235	5.986		23.4271	5.73497	121.42
108837	45.1	0.57491	5.983		23.6261	5.76062	121.359
109037	45.1	0.57491	5.983		23.6261	5.76062	121.359
109238	45.1	0.57491	5.983		23.6261	5.76062	121.359
109438	45.1	0.57491	5.983		23.6261	5.76062	121.359
109639	45.1	0.57491	5.983		23.6261	5.76062	121.359
109839	44.98	0.57956	5.985		23.5633	5.80721	121.4
110039	45.06	0.57933	5.985		23.6052	5.80491	121.4
110241	45.06	0.57933	5.985		23.6052	5.80491	121.4
110442	45.26	0.58196	5.981		23.71	5.83126	121.318
110643	46.36	0.58177	5.987		24.2862	5.82936	121.44
110843	46.02	0.58449	5.984		24.1081	5.85661	121.379
111043	46.02	0.58449	5.984		24.1081	5.85661	121.379
111243	46.02	0.58449	5.984		24.1081	5.85661	121.379
111444	45.7	0.5872	5.985		23.9405	5.88377	121.4
111645	45.52	0.58727	5.984		23.8462	5.88447	121.379
111845	45.52	0.58727	5.984		23.8462	5.88447	121.379
112045	45.12	0.59001	5.986		23.6366	5.91192	121.42
112245	46.24	0.58992	5.985		24.2233	5.91102	121.4
112446	46.24	0.58992	5.985		24.2233	5.91102	121.4
112646	45.86	0.59255	5.985		24.0243	5.93737	121.4
112847	45.86	0.59255	5.985		24.0243	5.93737	121.4
113047	46.36	0.59497	5.98		24.2862	5.96162	121.298
113247	46.42	0.59495	5.986		24.3176	5.96142	121.42
113448	46.42	0.59495	5.986		24.3176	5.96142	121.42
113648	46.42	0.59495	5.986		24.3176	5.96142	121.42
113849	46.42	0.59495	5.986		24.3176	5.96142	121.42
114049	46.38	0.60007	5.985		24.2967	6.01273	121.4
114249	46.36	0.59997	5.985		24.2862	6.01172	121.4
114451	46.36	0.59997	5.985		24.2862	6.01172	121.4
114652	46.78	0.60243	5.984		24.5062	6.03637	121.379
114853	46.78	0.60243	5.984		24.5062	6.03637	121.379
115053	47.32	0.60484	5.985		24.7891	6.06052	121.4
115253	47.04	0.60484	5.983		24.6424	6.06052	121.359
115453	47.04	0.60484	5.983		24.6424	6.06052	121.359
115654	47.06	0.60743	5.984		24.6529	6.08647	121.379
115854	47.96	0.60711	5.985		25.1244	6.08327	121.4
116055	47.9	0.60974	5.982		25.093	6.10962	121.339
116255	47.9	0.60974	5.982		25.093	6.10962	121.339
116455	47.9	0.60974	5.982		25.093	6.10962	121.339
116656	47.7	0.6126	5.984		24.9882	6.13828	121.379
116856	47.68	0.61251	5.986		24.9777	6.13737	121.42
117057	47.68	0.61251	5.986		24.9777	6.13737	121.42
117257	47.56	0.61535	5.982		24.9148	6.16583	121.339
117457	48.7	0.61495	5.985		25.512	6.16182	121.4
117659	48.86	0.6176	5.982		25.5959	6.18838	121.339
117860	48.86	0.6176	5.982		25.5959	6.18838	121.339
118061	49.14	0.6183	5.986		25.7425	6.19539	121.42
118261	49.3	0.62075	5.983		25.8264	6.21994	121.359
118461	48.88	0.62069	5.986		25.6063	6.21934	121.42
118661	49.24	0.62077	5.984		25.7949	6.22014	121.379
118862	49.68	0.62331	5.982		26.0254	6.24559	121.339
119062	48.68	0.62406	5.984		25.5016	6.25311	121.379
119263	48.48	0.62423	5.985		25.3968	6.25481	121.4
119463	48.48	0.62423	5.985		25.3968	6.25481	121.4
119663	48.18	0.62714	5.983		25.2396	6.28397	121.359
119864	48.88	0.62699	5.986		25.6063	6.28246	121.42
120064	48.88	0.62699	5.986		25.6063	6.28246	121.42
120265	48.38	0.62977	5.984		25.3444	6.31032	121.379
120465	49.78	0.62948	5.986		26.0778	6.30741	121.42
120665	49.7	0.6323	5.983		26.0359	6.33567	121.359
120867	49.7	0.6323	5.983		26.0359	6.33567	121.359
121068	49.7	0.6323	5.983		26.0359	6.33567	121.359
121269	49.32	0.63494	5.981		25.8368	6.36212	121.318
121469	49.7	0.6347	5.985		26.0359	6.35972	121.4
121669	49.7	0.6347	5.985		26.0359	6.35972	121.4
121869	49.7	0.6347	5.985		26.0359	6.35972	121.4
122070	50.18	0.63734	5.983		26.2874	6.38617	121.359
122270	50.1	0.64007	5.983		26.2454	6.41353	121.359
122471	50.1	0.64007	5.983		26.2454	6.41353	121.359
122671	50.1	0.64007	5.983		26.2454	6.41353	121.359
122871	49.96	0.64281	5.985		26.1721	6.44098	121.4
123072	49.94	0.64272	5.983		26.1616	6.44008	121.359
123272	49.94	0.64272	5.983		26.1616	6.44008	121.359
123473	49.62	0.64533	5.984		25.994	6.46623	121.379
123673	49.62	0.64533	5.984		25.994	6.46623	121.379
123873	49.62	0.64533	5.984		25.994	6.46623	121.379
124075	49.66	0.64792	5.982		26.0149	6.49218	121.339
124276	49.66	0.64792	5.982		26.0149	6.49218	121.339
124477	50.02	0.65039	5.985		26.2035	6.51693	121.4
124677	51.28	0.65015	5.984		26.8636	6.51453	121.379
124877	50.94	0.65297	5.983		26.6855	6.54279	121.359
125077	50.94	0.65297	5.983		26.6855	6.54279	121.359
125278	50.94	0.65297	5.983		26.6855	6.54279	121.359
125478	50.46	0.65564	5.984		26.434	6.56954	121.379
125679	50.86	0.6554	5.987		26.6436	6.56713	121.44
125879	50.86	0.6554	5.987		26.6436	6.56713	121.44
126079	50.86	0.6554	5.987		26.6436	6.56713	121.44
126280	50.86	0.6554	5.987		26.6436	6.56713	121.44
126480	51.16	0.66049	5.983		26.8007	6.61814	121.359
126681	50.74	0.66054	5.987		26.5807	6.61864	121.44
126881	50.74	0.66054	5.987		26.5807	6.61864	121.44
127081	50.38	0.66307	5.981		26.3921	6.64399	121.318
127283	52.22	0.66272	5.985		27.356	6.64048	121.4
127484	51.72	0.6655	5.984		27.0941	6.66834	121.379
127685	51.72	0.6655	5.984		27.0941	6.66834	121.379
127885	51.72	0.6655	5.984		27.0941	6.66834	121.379
128085	51.72	0.6655	5.984		27.0941	6.66834	121.379
128285	51.72	0.6655	5.984		27.0941	6.66834	121.379
128486	51.9	0.67033	5.982		27.1884	6.71673	121.339
128686	51.9	0.67033	5.982		27.1884	6.71673	121.339
128887	51.9	0.67033	5.982		27.1884	6.71673	121.339
129087	51.9	0.67033	5.982		27.1884	6.71673	121.339
129287	51.9	0.67033	5.982		27.1884	6.71673	121.339
129488	51.82	0.67526	5.984		27.1465	6.76613	121.379
129688	51.68	0.67511	5.984		27.0731	6.76463	121.379
129889	51.68	0.67511	5.984		27.0731	6.76463	121.379
130089	52.28	0.6775	5.983		27.3875	6.78858	121.359
130289	52.28	0.6775	5.983		27.3875	6.78858	121.359
130491	52.36	0.68007	5.98		27.4294	6.81433	121.298
130692	52.88	0.67979	5.99		27.7018	6.81152	121.501
130893	52.88	0.67979	5.99		27.7018	6.81152	121.501
131093	52.88	0.67979	5.99		27.7018	6.81152	121.501
131293	52.88	0.67979	5.99		27.7018	6.81152	121.501
131493	52.88	0.68489	5.984		27.7018	6.86263	121.379
131694	52.82	0.68471	5.984		27.6704	6.86082	121.379
131895	52.82	0.68471	5.984		27.6704	6.86082	121.379
132095	52.32	0.68729	5.983		27.4084	6.88667	121.359
132295	52.32	0.68729	5.983		27.4084	6.88667	121.359
132495	53.2	0.68978	5.985		27.8694	6.91162	121.4
132696	52.9	0.68968	5.986		27.7123	6.91062	121.42
132896	52.9	0.68968	5.986		27.7123	6.91062	121.42
133097	52.96	0.69226	5.983		27.7437	6.93647	121.359
133297	52.96	0.69226	5.983		27.7437	6.93647	121.359
133497	53.58	0.69455	5.983		28.0685	6.95942	121.359
133698	54.32	0.69419	5.984		28.4561	6.95581	121.379
133898	54.62	0.69668	5.983		28.6133	6.98076	121.359
134099	54.62	0.69668	5.983		28.6133	6.98076	121.359
134299	55.12	0.69751	5.987		28.8752	6.98908	121.44
134499	53.84	0.69936	5.981		28.2047	7.00762	121.318
134701	53.74	0.69939	5.989		28.1523	7.00792	121.481
134902	53.74	0.69939	5.989		28.1523	7.00792	121.481
135103	53.6	0.70214	5.983		28.079	7.03547	121.359
135303	53.6	0.70214	5.983		28.079	7.03547	121.359
135503	54.18	0.70444	5.985		28.3828	7.05852	121.4
135703	54.28	0.7042	5.987		28.4352	7.05611	121.44
135904	54.28	0.7042	5.987		28.4352	7.05611	121.44
136104	54.04	0.70669	5.981		28.3095	7.08106	121.318
136305	54.04	0.70669	5.981		28.3095	7.08106	121.318
136505	54.78	0.70923	5.985		28.6971	7.10651	121.4
136705	54.54	0.70931	5.985		28.5714	7.10731	121.4
136906	54.54	0.70931	5.985		28.5714	7.10731	121.4
137106	54.32	0.71179	5.984		28.4561	7.13216	121.379
137307	54.32	0.71179	5.984		28.4561	7.13216	121.379
137507	55.26	0.71406	5.983		28.9486	7.15491	121.359
137707	55.34	0.71383	5.987		28.9905	7.15261	121.44
137909	55.34	0.71383	5.987		28.9905	7.15261	121.44
138110	55.36	0.71662	5.986		29.001	7.18056	121.42
138311	56.26	0.71631	5.985		29.4724	7.17745	121.4
138511	56.14	0.71915	5.985		29.4096	7.20591	121.4
138711	56.14	0.71915	5.985		29.4096	7.20591	121.4
138911	56.14	0.71915	5.985		29.4096	7.20591	121.4
139112	55.6	0.72174	5.983		29.1267	7.23186	121.359
139312	55.98	0.72161	5.984		29.3258	7.23056	121.379
139513	55.98	0.72161	5.984		29.3258	7.23056	121.379
139713	55.98	0.72161	5.984		29.3258	7.23056	121.379
139913	55.98	0.72161	5.984		29.3258	7.23056	121.379
140114	56.12	0.72656	5.983		29.3991	7.28016	121.359
140314	56.36	0.72657	5.983		29.5248	7.28026	121.359
140515	56.36	0.72657	5.983		29.5248	7.28026	121.359
140715	56.08	0.72937	5.983		29.3781	7.30832	121.359
140915	57.26	0.72896	5.984		29.9963	7.30421	121.379
141117	57.04	0.73164	5.986		29.881	7.33106	121.42
141318	57.04	0.73164	5.986		29.881	7.33106	121.42
141519	57.04	0.73164	5.986		29.881	7.33106	121.42
141719	56.76	0.73463	5.986		29.7344	7.36102	121.42
141919	56.5	0.73463	5.985		29.5982	7.36102	121.4
142119	56.5	0.73463	5.985		29.5982	7.36102	121.4
142320	56.78	0.73713	5.983		29.7448	7.38607	121.359
142520	57.86	0.73675	5.987		30.3106	7.38226	121.44
142721	57.86	0.73935	5.98		30.3106	7.40832	121.298
142921	57.42	0.7395	5.984		30.0801	7.40982	121.379
143121	57.42	0.7395	5.984		30.0801	7.40982	121.379
143322	57.74	0.74209	5.985		30.2477	7.43577	121.4
143522	57.62	0.74223	5.985		30.1849	7.43717	121.4
143723	57.62	0.74223	5.985		30.1849	7.43717	121.4
143923	57.36	0.74502	5.981		30.0487	7.46513	121.318
144123	58.2	0.74473	5.983		30.4887	7.46222	121.359
144325	58.66	0.74737	5.984		30.7297	7.48868	121.379
144526	58.66	0.74737	5.984		30.7297	7.48868	121.379
144727	58.86	0.7477	5.983		30.8345	7.49198	121.359
144927	58.74	0.75034	5.987		30.7716	7.51844	121.44
145127	58.74	0.75034	5.987		30.7716	7.51844	121.44
145327	59.16	0.75049	5.988		30.9916	7.51994	121.46
145528	58.34	0.75318	5.986		30.5621	7.54689	121.42
145728	58.34	0.75318	5.986		30.5621	7.54689	121.42
145929	58.34	0.75318	5.986		30.5621	7.54689	121.42
146129	58.36	0.75597	5.987		30.5725	7.57485	121.44
146329	58.4	0.75576	5.984		30.5935	7.57275	121.379
146530	58.4	0.75576	5.984		30.5935	7.57275	121.379
146730	58.02	0.75879	5.983		30.3944	7.60311	121.359
146931	59.4	0.75831	5.987		31.1174	7.5983	121.44
147131	59.16	0.76099	5.987		30.9916	7.62515	121.44
147331	59.16	0.76099	5.987		30.9916	7.62515	121.44
147533	59.16	0.76099	5.987		30.9916	7.62515	121.44
147734	59.12	0.76361	5.983		30.9707	7.6514	121.359
147935	59.24	0.76347	5.983		31.0335	7.65	121.359
148135	59.24	0.76347	5.983		31.0335	7.65	121.359
148335	58.98	0.76626	5.986		30.8973	7.67796	121.42
148535	60.34	0.76628	5.987		31.6098	7.67816	121.44
148736	60.16	0.76864	5.984		31.5155	7.7018	121.379
148936	59.84	0.76876	5.982		31.3479	7.70301	121.339
149137	60.66	0.76957	5.984		31.7774	7.71112	121.379
149337	60.62	0.77178	5.981		31.7565	7.73327	121.318
149537	60.62	0.77178	5.981		31.7565	7.73327	121.318
149738	60.76	0.77183	5.987		31.8298	7.73377	121.44
149938	60.96	0.77476	5.982		31.9346	7.76313	121.339
150139	60.96	0.77476	5.982		31.9346	7.76313	121.339
150339	60.88	0.77479	5.985		31.8927	7.76343	121.4
150539	61.12	0.77761	5.983		32.0184	7.79168	121.359
150741	61.12	0.77761	5.983		32.0184	7.79168	121.359
150942	61.12	0.77771	5.985		32.0184	7.79269	121.4
151143	61.48	0.78058	5.983		32.207	7.82144	121.359
151343	60.56	0.7811	5.982		31.725	7.82665	121.339
151543	60.48	0.78113	5.986		31.6831	7.82695	121.42
151743	60.48	0.78113	5.986		31.6831	7.82695	121.42
151944	60.58	0.7843	5.983		31.7355	7.85872	121.359
152145	60.22	0.78442	5.986		31.5469	7.85992	121.42
152345	60.22	0.78442	5.986		31.5469	7.85992	121.42
152545	60.9	0.78708	5.984		31.9032	7.88657	121.379
152745	60.82	0.78691	5.988		31.8612	7.88487	121.46
152946	60.82	0.78691	5.988		31.8612	7.88487	121.46
153146	60.68	0.78966	5.985		31.7879	7.91242	121.4
153347	61.56	0.78945	5.986		32.2489	7.91032	121.42
153547	61.94	0.79242	5.986		32.448	7.94008	121.42
153747	61.94	0.79242	5.986		32.448	7.94008	121.42
153948	62.18	0.79244	5.984		32.5737	7.94028	121.379
154148	62.34	0.79508	5.985		32.6575	7.96673	121.4
154349	61.92	0.79523	5.983		32.4375	7.96824	121.359
154549	62.5	0.79582	5.983		32.7413	7.97415	121.359
154749	62.7	0.79765	5.985		32.8461	7.99248	121.4
154951	62.84	0.79891	5.985		32.9194	8.00511	121.4
155152	62.94	0.79987	5.982		32.9718	8.01473	121.339
155353	62.96	0.80066	5.984		32.9823	8.02265	121.379
155553	62.88	0.80139	5.985		32.9404	8.02996	121.4
155753	62.96	0.80226	5.986		32.9823	8.03868	121.42
155953	63	0.80315	5.984		33.0033	8.0476	121.379
156154	63.12	0.80401	5.985		33.0661	8.05621	121.4
156354	63.26	0.80486	5.985		33.1395	8.06473	121.4
156555	63.26	0.80576	5.987		33.1395	8.07375	121.44
156755	63.3	0.80685	5.984		33.1604	8.08467	121.379
156955	63.26	0.80786	5.985		33.1395	8.09479	121.4
157156	63.44	0.8089	5.986		33.2338	8.10521	121.42
157356	63.58	0.80975	5.985		33.3071	8.11373	121.4
157557	63.76	0.81068	5.985		33.4014	8.12305	121.4
157757	63.62	0.81173	5.984		33.3281	8.13357	121.379
157957	63.78	0.81268	5.984		33.4119	8.14309	121.379
158159	63.82	0.81366	5.985		33.4328	8.15291	121.4
158360	63.96	0.81461	5.985		33.5062	8.16242	121.4
158561	63.9	0.81554	5.984		33.4747	8.17174	121.379
158761	64.1	0.81646	5.982		33.5795	8.18096	121.339
158961	64.12	0.81746	5.984		33.59	8.19098	121.379
159161	64.2	0.81833	5.982		33.6319	8.1997	121.339
159362	64.36	0.81927	5.987		33.7157	8.20912	121.44
159562	64.38	0.82027	5.983		33.7262	8.21914	121.359
159763	64.56	0.8212	5.984		33.8205	8.22846	121.379
159963	64.64	0.82218	5.983		33.8624	8.23828	121.359
160163	64.62	0.82328	5.987		33.8519	8.2493	121.44
160364	64.76	0.82433	5.981		33.9253	8.25982	121.318
160564	64.84	0.82511	5.985		33.9672	8.26764	121.4
160765	64.8	0.82632	5.986		33.9462	8.27976	121.42
160965	64.84	0.82711	5.982		33.9672	8.28768	121.339
161165	64.98	0.82816	5.982		34.0405	8.2982	121.339
161367	65.06	0.82913	5.984		34.0824	8.30792	121.379
161568	65.2	0.83018	5.984		34.1558	8.31844	121.379
161769	65.26	0.83096	5.983		34.1872	8.32625	121.359
161969	65.3	0.83195	5.984		34.2081	8.33617	121.379
162169	65.42	0.8329	5.987		34.271	8.34569	121.44
162369	65.5	0.83388	5.986		34.3129	8.35551	121.42
162570	65.5	0.83487	5.987		34.3129	8.36543	121.44
162770	65.58	0.83585	5.985		34.3548	8.37525	121.4
162971	65.62	0.83673	5.985		34.3758	8.38407	121.4
163171	65.7	0.83771	5.983		34.4177	8.39389	121.359
163371	65.78	0.83868	5.987		34.4596	8.40361	121.44
163572	65.96	0.83961	5.984		34.5539	8.41293	121.379
163772	65.96	0.84061	5.984		34.5539	8.42295	121.379
163973	66.12	0.84146	5.985		34.6377	8.43146	121.4
164173	66.06	0.84248	5.988		34.6063	8.44168	121.46
164373	66.2	0.84333	5.984		34.6796	8.4502	121.379
164575	66.32	0.84429	5.983		34.7425	8.45982	121.359
164776	66.3	0.8454	5.983		34.732	8.47094	121.359
164977	66.46	0.84614	5.983		34.8158	8.47836	121.359
165177	66.56	0.8473	5.983		34.8682	8.48998	121.359
165377	66.6	0.84829	5.983		34.8892	8.4999	121.359
165577	66.68	0.84946	5.984		34.9311	8.51162	121.379
165778	66.78	0.85043	5.984		34.9835	8.52134	121.379
165978	66.86	0.8513	5.984		35.0254	8.53006	121.379
166179	66.96	0.85246	5.983		35.0777	8.54168	121.359
166379	67	0.85345	5.984		35.0987	8.5516	121.379
166579	67.1	0.85431	5.984		35.1511	8.56022	121.379
166780	67.16	0.85529	5.984		35.1825	8.57004	121.379
166980	67.2	0.85618	5.984		35.2035	8.57896	121.379
167181	67.28	0.85715	5.984		35.2454	8.58868	121.379
167381	67.32	0.85814	5.983		35.2663	8.5986	121.359
167581	67.4	0.85911	5.985		35.3082	8.60832	121.4
167783	67.46	0.85999	5.985		35.3397	8.61713	121.4
167984	67.62	0.86103	5.982		35.4235	8.62756	121.339
168185	67.66	0.86202	5.985		35.4445	8.63747	121.4
168385	67.76	0.86298	5.986		35.4968	8.64709	121.42
168585	67.78	0.86388	5.983		35.5073	8.65611	121.359
168785	67.88	0.86484	5.986		35.5597	8.66573	121.42
168986	67.94	0.86572	5.983		35.5911	8.67455	121.359
169186	67.96	0.86681	5.988		35.6016	8.68547	121.46
169387	68.02	0.86779	5.985		35.633	8.69529	121.4
169587	68.18	0.86874	5.986		35.7169	8.70481	121.42
169787	68.2	0.86963	5.985		35.7273	8.71373	121.4
169988	68.36	0.87057	5.985		35.8112	8.72315	121.4
170188	68.5	0.87152	5.984		35.8845	8.73267	121.379
170389	68.52	0.87262	5.984		35.895	8.74369	121.379
170589	68.46	0.87364	5.987		35.8635	8.75391	121.44
170789	68.6	0.87469	5.986		35.9369	8.76443	121.42
170991	68.66	0.87557	5.983		35.9683	8.77325	121.359
171192	68.8	0.87642	5.981		36.0417	8.78176	121.318
171393	68.8	0.87752	5.983		36.0417	8.79279	121.359
171593	68.92	0.87858	5.983		36.1045	8.80341	121.359
171793	68.94	0.87957	5.984		36.115	8.81333	121.379
171993	69	0.88055	5.983		36.1464	8.82315	121.359
172194	69.14	0.8815	5.985		36.2198	8.83267	121.4
172395	69.22	0.88257	5.982		36.2617	8.84339	121.339
172595	69.38	0.88342	5.986		36.3455	8.8519	121.42
172795	69.36	0.88442	5.984		36.335	8.86192	121.379
172995	69.44	0.8855	5.983		36.3769	8.87275	121.359
173196	69.62	0.88643	5.985		36.4712	8.88206	121.4
173396	69.42	0.8875	5.986		36.3664	8.89279	121.42
173597	69.6	0.88844	5.983		36.4607	8.9022	121.359
173797	69.66	0.88932	5.988		36.4922	8.91102	121.46
173997	69.82	0.89036	5.985		36.576	8.92144	121.4
174198	69.82	0.89116	5.981		36.576	8.92946	121.318
174398	69.86	0.89215	5.985		36.5969	8.93938	121.4
174599	69.9	0.89323	5.983		36.6179	8.9502	121.359
174799	70.02	0.89429	5.981		36.6808	8.96082	121.318
174999	70.18	0.89534	5.984		36.7646	8.97134	121.379
175201	70.24	0.89652	5.983		36.796	8.98317	121.359
175402	70.36	0.89747	5.985		36.8589	8.99269	121.4
175603	70.48	0.89863	5.984		36.9217	9.00431	121.379
175803	70.46	0.89964	5.983		36.9113	9.01443	121.359
176003	70.56	0.9005	5.983		36.9637	9.02305	121.359
176203	70.72	0.90145	5.981		37.0475	9.03257	121.318
176404	70.66	0.90247	5.985		37.016	9.04279	121.4
176604	70.8	0.90342	5.984		37.0894	9.0523	121.379
176805	70.8	0.90432	5.985		37.0894	9.06132	121.4
177005	71.02	0.90524	5.985		37.2046	9.07054	121.4
177205	70.98	0.90626	5.987		37.1837	9.08076	121.44
177406	71.02	0.90724	5.988		37.2046	9.09058	121.46
177606	71.06	0.90813	5.986		37.2256	9.0995	121.42
177807	71.2	0.90918	5.985		37.2989	9.11002	121.4
178007	71.28	0.91015	5.985		37.3408	9.11974	121.4
178207	71.32	0.91104	5.985		37.3618	9.12866	121.4
178409	71.28	0.91195	5.987		37.3408	9.13778	121.44
178610	71.38	0.91302	5.984		37.3932	9.1485	121.379
178811	71.44	0.9139	5.987		37.4246	9.15731	121.44
179011	71.62	0.91483	5.985		37.5189	9.16663	121.4
179211	71.6	0.91584	5.986		37.5085	9.17675	121.42
179411	71.64	0.91683	5.985		37.5294	9.18667	121.4
179612	71.74	0.91789	5.984		37.5818	9.19729	121.379
179812	71.86	0.91855	5.986		37.6447	9.20391	121.42
180013	71.94	0.91952	5.985		37.6866	9.21363	121.4
180213	71.94	0.92052	5.983		37.6866	9.22365	121.359
180413	72.06	0.92158	5.987		37.7494	9.23427	121.44
180614	72.12	0.92266	5.982		37.7809	9.24509	121.339
180814	72.3	0.92349	5.983		37.8752	9.25341	121.359
181015	72.28	0.9245	5.986		37.8647	9.26353	121.42
181215	72.34	0.92548	5.984		37.8961	9.27335	121.379
181415	72.48	0.92653	5.985		37.9695	9.28387	121.4
181617	72.5	0.92722	5.985		37.9799	9.29078	121.4
181818	72.52	0.92842	5.985		37.9904	9.30281	121.4
182019	72.58	0.9293	5.981		38.0218	9.31162	121.318
182219	72.6	0.93019	5.984		38.0323	9.32054	121.379
182419	72.74	0.93124	5.985		38.1057	9.33106	121.4
182619	72.86	0.9322	5.985		38.1685	9.34068	121.4
182820	72.94	0.93307	5.985		38.2104	9.3494	121.4
183020	72.96	0.93406	5.984		38.2209	9.35932	121.379
183221	73	0.93505	5.987		38.2419	9.36924	121.44
183421	73.14	0.936	5.985		38.3152	9.37876	121.4
183621	73.22	0.93707	5.985		38.3571	9.38948	121.4
183822	73.28	0.93835	5.984		38.3886	9.4023	121.379
184022	73.34	0.93933	5.985		38.42	9.41212	121.4
184223	73.54	0.94036	5.986		38.5248	9.42244	121.42
184423	73.54	0.94126	5.984		38.5248	9.43146	121.379
184623	73.58	0.94225	5.983		38.5457	9.44138	121.359
184825	73.6	0.94334	5.988		38.5562	9.4523	121.46
185026	73.76	0.94428	5.982		38.64	9.46172	121.339
185227	73.76	0.94538	5.985		38.64	9.47275	121.4
185427	73.84	0.94616	5.987		38.6819	9.48056	121.44
185627	73.88	0.94714	5.986		38.7029	9.49038	121.42
185827	73.9	0.94813	5.986		38.7133	9.5003	121.42
186028	73.98	0.94901	5.982		38.7553	9.50912	121.339
186228	74.14	0.95005	5.983		38.8391	9.51954	121.359
186429	74.16	0.95094	5.984		38.8496	9.52846	121.379
186629	74.18	0.95194	5.983		38.86	9.53848	121.359
186829	74.28	0.9529	5.984		38.9124	9.5481	121.379
187030	74.38	0.95387	5.982		38.9648	9.55782	121.339
187230	74.36	0.95467	5.982		38.9543	9.56583	121.339
187431	74.44	0.95555	5.983		38.9962	9.57465	121.359
187631	74.5	0.95673	5.988		39.0277	9.58647	121.46
187831	74.58	0.9577	5.982		39.0696	9.59619	121.339
188033	74.58	0.9587	5.985		39.0696	9.60621	121.4
188234	74.78	0.95963	5.982		39.1743	9.61553	121.339
188435	74.86	0.9606	5.988		39.2163	9.62525	121.46
188635	74.88	0.96149	5.982		39.2267	9.63417	121.339
188835	75.02	0.96244	5.983		39.3001	9.64369	121.359
189035	75.08	0.96342	5.982		39.3315	9.65351	121.339
189236	75.16	0.96439	5.982		39.3734	9.66323	121.339
189436	75.26	0.96546	5.984		39.4258	9.67395	121.379
189637	75.3	0.96634	5.985		39.4468	9.68277	121.4
189837	75.38	0.96732	5.984		39.4887	9.69259	121.379
190037	75.4	0.96811	5.985		39.4991	9.7005	121.4
190238	75.48	0.96928	5.987		39.541	9.71222	121.44
190438	75.58	0.97015	5.987		39.5934	9.72094	121.44
190639	75.62	0.97123	5.983		39.6144	9.73176	121.359
190839	75.64	0.97233	5.984		39.6249	9.74279	121.379
191039	75.72	0.9733	5.983		39.6668	9.75251	121.359
191241	75.7	0.97441	5.985		39.6563	9.76363	121.4
191442	75.78	0.97528	5.986		39.6982	9.77234	121.42
191643	75.84	0.97626	5.983		39.7296	9.78216	121.359
191843	76	0.9772	5.986		39.8135	9.79158	121.42
192043	76.14	0.97805	5.983		39.8868	9.8001	121.359
192243	76.26	0.97921	5.985		39.9497	9.81172	121.4
192444	76.32	0.97999	5.981		39.9811	9.81954	121.318
192645	76.42	0.98085	5.983		40.0335	9.82816	121.359
192845	76.32	0.98189	5.983		39.9811	9.83858	121.359
193045	76.48	0.98283	5.983		40.0649	9.848	121.359
193245	76.5	0.98382	5.985		40.0754	9.85792	121.4
193446	76.58	0.9849	5.985		40.1173	9.86874	121.4
193646	76.68	0.98576	5.983		40.1697	9.87735	121.359
193847	76.8	0.98682	5.986		40.2325	9.88798	121.42
194047	76.84	0.98801	5.983		40.2535	9.8999	121.359
194247	76.9	0.98888	5.983		40.2849	9.90862	121.359
194448	76.94	0.99007	5.986		40.3059	9.92054	121.42
194648	77	0.99095	5.983		40.3373	9.92936	121.359
194849	77	0.99205	5.982		40.3373	9.94038	121.339
195049	77.14	0.993	5.984		40.4107	9.9499	121.379
195249	77.26	0.99396	5.985		40.4735	9.95952	121.4
195451	77.18	0.99489	5.983		40.4316	9.96884	121.359
195652	77.24	0.99587	5.986		40.463	9.97866	121.42
195853	77.36	0.99682	5.986		40.5259	9.98818	121.42
196053	77.44	0.9979	5.985		40.5678	9.999	121.4
196253	77.4	0.99881	5.981		40.5469	10.0081	121.318
196453	77.54	0.99976	5.986		40.6202	10.0176	121.42
196654	77.66	1.00052	5.988		40.6831	10.0253	121.46
196854	77.72	1.0017	5.985		40.7145	10.0371	121.4
197055	77.8	1.00247	5.989		40.7564	10.0448	121.481
197255	77.88	1.00364	5.985		40.7983	10.0565	121.4
197455	77.88	1.00454	5.986		40.7983	10.0655	121.42
197656	77.84	1.00556	5.985		40.7774	10.0758	121.4
197856	77.98	1.00641	5.987		40.8507	10.0843	121.44
198057	78.06	1.00748	5.984		40.8926	10.095	121.379
198257	78.1	1.00846	5.984		40.9136	10.1048	121.379
198457	78.24	1.00952	5.985		40.9869	10.1154	121.4
198659	78.38	1.01057	5.984		41.0602	10.126	121.379
198860	78.4	1.01156	5.984		41.0707	10.1359	121.379
199061	78.5	1.01262	5.985		41.1231	10.1465	121.4
199261	78.58	1.0136	5.984		41.165	10.1563	121.379
199461	78.46	1.01464	5.984		41.1022	10.1667	121.379
199661	78.6	1.01549	5.984		41.1755	10.1753	121.379
199862	78.76	1.01653	5.984		41.2593	10.1857	121.379
200062	78.82	1.01741	5.985		41.2907	10.1945	121.4
200263	78.86	1.0185	5.985		41.3117	10.2054	121.4
200463	78.94	1.01927	5.983		41.3536	10.2131	121.359
200663	78.86	1.0204	5.985		41.3117	10.2244	121.4
200864	79.02	1.02134	5.986		41.3955	10.2339	121.42
201064	79.16	1.02209	5.983		41.4689	10.2414	121.359
201265	79.16	1.02319	5.985		41.4689	10.2524	121.4
201465	79.16	1.02409	5.986		41.4689	10.2614	121.42
201665	79.24	1.02507	5.982		41.5108	10.2712	121.339
201867	79.36	1.02622	5.985		41.5736	10.2828	121.4
202068	79.54	1.02696	5.983		41.6679	10.2902	121.359
202269	79.56	1.02795	5.983		41.6784	10.3001	121.359
202469	79.64	1.02893	5.982		41.7203	10.3099	121.339
202669	79.76	1.02988	5.985		41.7832	10.3194	121.4
202869	79.68	1.03101	5.985		41.7413	10.3308	121.4
203070	79.74	1.03189	5.982		41.7727	10.3396	121.339
203270	79.74	1.03289	5.982		41.7727	10.3496	121.339
203471	79.84	1.03376	5.986		41.8251	10.3583	121.42
203671	79.9	1.03464	5.983		41.8565	10.3671	121.359
203871	80	1.0357	5.984		41.9089	10.3778	121.379
204072	80.18	1.03664	5.983		42.0032	10.3872	121.359
204272	80.22	1.03772	5.984		42.0241	10.398	121.379
204473	80.32	1.03869	5.983		42.0765	10.4077	121.359
204673	80.42	1.03975	5.983		42.1289	10.4183	121.359
204873	80.44	1.04075	5.987		42.1394	10.4284	121.44
205075	80.44	1.04165	5.983		42.1394	10.4374	121.359
205276	80.52	1.04252	5.986		42.1813	10.4461	121.42
205477	80.54	1.04351	5.985		42.1918	10.456	121.4
205677	80.62	1.04448	5.983		42.2337	10.4657	121.359
205877	80.72	1.04535	5.988		42.2861	10.4744	121.46
206077	80.78	1.04633	5.985		42.3175	10.4843	121.4
206278	80.78	1.04733	5.984		42.3175	10.4943	121.379
206478	80.82	1.04831	5.986		42.3385	10.5041	121.42
206679	80.82	1.04921	5.982		42.3385	10.5131	121.339
206879	80.96	1.05026	5.987		42.4118	10.5236	121.44
207079	81.12	1.05121	5.985		42.4956	10.5332	121.4
207280	81.14	1.0525	5.986		42.5061	10.5461	121.42
207480	81.2	1.05368	5.985		42.5375	10.5579	121.4
207681	81.28	1.05485	5.986		42.5794	10.5696	121.42
207881	81.46	1.05589	5.986		42.6737	10.5801	121.42
208081	81.48	1.05688	5.985		42.6842	10.59	121.4
208283	81.6	1.05784	5.985		42.7471	10.5996	121.4
208484	81.64	1.05883	5.983		42.768	10.6095	121.359
208685	81.66	1.05982	5.983		42.7785	10.6194	121.359
208885	81.82	1.06066	5.983		42.8623	10.6279	121.359
209085	81.78	1.06168	5.981		42.8414	10.6381	121.318
209285	81.84	1.06266	5.985		42.8728	10.6479	121.4
209486	81.9	1.06374	5.988		42.9042	10.6587	121.46
209686	82	1.0645	5.984		42.9566	10.6663	121.379
209887	82.04	1.06539	5.986		42.9776	10.6753	121.42
210087	82.06	1.06638	5.986		42.9881	10.6852	121.42
210287	82.1	1.06736	5.983		43.009	10.695	121.359
210488	82.2	1.06843	5.987		43.0614	10.7057	121.44
210688	82.28	1.0694	5.987		43.1033	10.7154	121.44
210889	82.44	1.07035	5.984		43.1871	10.7249	121.379
211089	82.38	1.07117	5.989		43.1557	10.7332	121.481
211289	82.52	1.07222	5.982		43.229	10.7437	121.339
211491	82.52	1.07322	5.983		43.229	10.7537	121.359
211692	82.58	1.0741	5.985		43.2605	10.7625	121.4
211893	82.68	1.07506	5.985		43.3128	10.7721	121.4
212093	82.7	1.07606	5.983		43.3233	10.7822	121.359
212293	82.82	1.07701	5.987		43.3862	10.7917	121.44
212493	82.82	1.07801	5.985		43.3862	10.8017	121.4
212694	82.96	1.07886	5.985		43.4595	10.8102	121.4
212895	83	1.07995	5.985		43.4805	10.8211	121.4
213095	82.98	1.08086	5.983		43.47	10.8303	121.359
213295	83	1.08185	5.984		43.4805	10.8402	121.379
213495	82.96	1.08286	5.983		43.4595	10.8503	121.359
213696	83.2	1.08368	5.985		43.5853	10.8585	121.4
213896	83.28	1.08465	5.987		43.6272	10.8682	121.44
214097	83.34	1.08573	5.982		43.6586	10.8791	121.339
214297	83.46	1.08659	5.985		43.7215	10.8877	121.4
214497	83.38	1.08752	5.986		43.6796	10.897	121.42
214698	83.5	1.08837	5.984		43.7424	10.9055	121.379
214898	83.6	1.08944	5.983		43.7948	10.9162	121.359
215099	83.76	1.09038	5.984		43.8786	10.9257	121.379
215299	83.86	1.09135	5.984		43.931	10.9354	121.379
215499	83.76	1.09238	5.986		43.8786	10.9457	121.42
215701	83.9	1.09344	5.986		43.952	10.9563	121.42
215902	83.96	1.09441	5.985		43.9834	10.966	121.4
216103	83.98	1.09531	5.983		43.9939	10.9751	121.359
216303	84.08	1.09637	5.987		44.0463	10.9857	121.44
216503	84.08	1.09737	5.988		44.0463	10.9957	121.46
216703	84.24	1.09832	5.986		44.1301	11.0052	121.42
216904	84.28	1.0994	5.984		44.151	11.016	121.379
217104	84.4	1.10046	5.986		44.2139	11.0267	121.42
217305	84.5	1.10152	5.985		44.2663	11.0373	121.4
217505	84.48	1.10263	5.986		44.2558	11.0484	121.42
217705	84.72	1.10345	5.984		44.3815	11.0566	121.379
217906	84.72	1.10435	5.987		44.3815	11.0656	121.44
218106	84.78	1.10543	5.987		44.413	11.0765	121.44
218307	84.8	1.10632	5.987		44.4234	11.0854	121.44
218507	84.86	1.1073	5.984		44.4549	11.0952	121.379
218707	84.98	1.10806	5.985		44.5177	11.1028	121.4
218909	85	1.10935	5.987		44.5282	11.1157	121.44
219110	85.08	1.11022	5.983		44.5701	11.1244	121.359
219311	85.14	1.1112	5.985		44.6015	11.1343	121.4
219511	85.26	1.11236	5.985		44.6644	11.1459	121.4
219711	85.3	1.11314	5.987		44.6854	11.1537	121.44
219911	85.4	1.11421	5.98		44.7378	11.1644	121.298
220112	85.36	1.11512	5.985		44.7168	11.1735	121.4
220312	85.34	1.11623	5.989		44.7063	11.1847	121.481
220513	85.48	1.11688	5.985		44.7797	11.1912	121.4
220713	85.5	1.11808	5.984		44.7901	11.2032	121.379
220913	85.62	1.11903	5.985		44.853	11.2127	121.4
221114	85.8	1.11987	5.985		44.9473	11.2211	121.4
221314	85.8	1.12077	5.983		44.9473	11.2302	121.359
221515	85.78	1.12178	5.982		44.9368	11.2403	121.339
221715	85.86	1.12275	5.983		44.9787	11.25	121.359
221915	85.92	1.12363	5.983		45.0102	11.2588	121.359
222117	86.08	1.12467	5.987		45.094	11.2692	121.44
222318	86	1.1258	5.983		45.0521	11.2806	121.359
222519	86.2	1.12673	5.983		45.1568	11.2899	121.359
222719	86.24	1.12782	5.987		45.1778	11.3008	121.44
222919	86.28	1.1288	5.985		45.1987	11.3106	121.4
223119	86.36	1.12987	5.983		45.2407	11.3213	121.359
223320	86.36	1.13067	5.982		45.2407	11.3294	121.339
223520	86.46	1.13164	5.986		45.293	11.3391	121.42
223721	86.46	1.13254	5.981		45.293	11.3481	121.318
223921	86.54	1.13361	5.986		45.335	11.3588	121.42
224121	86.62	1.13448	5.984		45.3769	11.3675	121.379
224322	86.72	1.13565	5.986		45.4292	11.3793	121.42
224522	86.8	1.13642	5.985		45.4712	11.387	121.4
224723	86.86	1.1375	5.986		45.5026	11.3978	121.42
224923	86.88	1.13839	5.982		45.5131	11.4067	121.339
225123	86.92	1.13928	5.987		45.534	11.4156	121.44
225325	86.98	1.14036	5.985		45.5655	11.4265	121.4
225526	87	1.14115	5.985		45.5759	11.4344	121.4
225727	87.14	1.1421	5.983		45.6493	11.4439	121.359
225927	87.2	1.14308	5.985		45.6807	11.4537	121.4
226127	87.24	1.14407	5.987		45.7017	11.4636	121.44
226327	87.28	1.14515	5.988		45.7226	11.4744	121.46
226528	87.42	1.1461	5.982		45.796	11.484	121.339
226728	87.42	1.1471	5.982		45.796	11.494	121.339
226929	87.48	1.14818	5.984		45.8274	11.5048	121.379
227129	87.58	1.14905	5.987		45.8798	11.5135	121.44
227329	87.56	1.15015	5.986		45.8693	11.5245	121.42
227530	87.7	1.1514	5.981		45.9426	11.5371	121.318
227730	87.72	1.1523	5.987		45.9531	11.5461	121.44
227931	87.88	1.15354	5.986		46.0369	11.5585	121.42
228131	87.9	1.15443	5.983		46.0474	11.5674	121.359
228331	88.02	1.15549	5.985		46.1103	11.5781	121.4
228533	88.08	1.15637	5.982		46.1417	11.5869	121.339
228734	88.06	1.15738	5.984		46.1312	11.597	121.379
228935	88.26	1.15831	5.983		46.236	11.6063	121.359
229135	88.26	1.15941	5.987		46.236	11.6173	121.44
229335	88.24	1.16032	5.987		46.2255	11.6265	121.44
229535	88.34	1.16128	5.985		46.2779	11.6361	121.4
229736	88.46	1.16224	5.985		46.3408	11.6457	121.4
229936	88.56	1.1631	5.984		46.3932	11.6543	121.379
230137	88.62	1.16408	5.986		46.4246	11.6641	121.42
230337	88.58	1.1651	5.986		46.4036	11.6743	121.42
230537	88.68	1.16606	5.985		46.456	11.684	121.4
230738	88.64	1.16708	5.984		46.4351	11.6942	121.379
230938	88.72	1.16795	5.986		46.477	11.7029	121.42
231139	88.8	1.16892	5.984		46.5189	11.7126	121.379
231339	88.82	1.16981	5.984		46.5294	11.7215	121.379
231539	88.88	1.17089	5.986		46.5608	11.7324	121.42
231741	89.04	1.17184	5.985		46.6446	11.7419	121.4
231942	89.08	1.17282	5.986		46.6656	11.7517	121.42
232143	89.12	1.17381	5.983		46.6865	11.7616	121.359
232343	89.14	1.1748	5.985		46.697	11.7715	121.4
232543	89.26	1.17576	5.986		46.7599	11.7812	121.42
232743	89.34	1.17673	5.989		46.8018	11.7909	121.481
232944	89.42	1.1776	5.985		46.8437	11.7996	121.4
233145	89.4	1.17861	5.986		46.8332	11.8097	121.42
233345	89.38	1.17972	5.984		46.8227	11.8208	121.379
233545	89.56	1.18055	5.985		46.917	11.8292	121.4
233745	89.48	1.18148	5.985		46.8751	11.8385	121.4
233946	89.6	1.18244	5.984		46.938	11.8481	121.379
234146	89.78	1.18348	5.985		47.0323	11.8585	121.4
234347	89.78	1.18458	5.985		47.0323	11.8695	121.4
234547	89.86	1.18555	5.985		47.0742	11.8793	121.4
234747	89.94	1.18652	5.984		47.1161	11.889	121.379
234948	90.02	1.18769	5.983		47.158	11.9007	121.359
235148	90.14	1.18855	5.983		47.2209	11.9093	121.359
235349	90.2	1.18963	5.984		47.2523	11.9201	121.379
235549	90.34	1.19048	5.985		47.3256	11.9287	121.4
235749	90.48	1.19153	5.985		47.399	11.9392	121.4
235951	90.46	1.19244	5.983		47.3885	11.9483	121.359
236152	90.44	1.19345	5.986		47.378	11.9584	121.42
236353	90.58	1.1944	5.983		47.4514	11.9679	121.359
236553	90.56	1.1953	5.986		47.4409	11.977	121.42
236753	90.68	1.19626	5.986		47.5037	11.9866	121.42
236953	90.76	1.19713	5.985		47.5456	11.9953	121.4
237154	90.78	1.19823	5.986		47.5561	12.0063	121.42
237354	90.82	1.19911	5.985		47.5771	12.0151	121.4
237555	90.88	1.20009	5.985		47.6085	12.0249	121.4
237755	90.9	1.20118	5.986		47.619	12.0359	121.42
237955	91.04	1.20204	5.984		47.6923	12.0445	121.379
238156	91.06	1.20313	5.986		47.7028	12.0554	121.42
238356	91.04	1.20424	5.985		47.6923	12.0665	121.4
238557	91.18	1.20529	5.986		47.7657	12.0771	121.42
238757	91.12	1.20621	5.983		47.7342	12.0863	121.359
238957	91.38	1.20722	5.984		47.8704	12.0964	121.379
239159	91.44	1.2083	5.986		47.9019	12.1072	121.42
239360	91.36	1.20932	5.984		47.86	12.1174	121.379
239561	91.54	1.21026	5.985		47.9543	12.1269	121.4
239761	91.62	1.21113	5.982		47.9962	12.1356	121.339
239961	91.6	1.21214	5.985		47.9857	12.1457	121.4
240161	91.68	1.21321	5.984		48.0276	12.1564	121.379
240362	91.72	1.2142	5.985		48.0486	12.1663	121.4
240562	91.88	1.21484	5.985		48.1324	12.1727	121.4
240763	91.86	1.21595	5.984		48.1219	12.1839	121.379
240963	91.9	1.21683	5.984		48.1428	12.1927	121.379
241163	91.96	1.21791	5.984		48.1743	12.2035	121.379
241364	92.02	1.21879	5.986		48.2057	12.2123	121.42
241564	92.1	1.21976	5.985		48.2476	12.222	121.4
241765	92.1	1.22076	5.982		48.2476	12.2321	121.339
241965	92.18	1.22174	5.984		48.2895	12.2419	121.379
242165	92.14	1.22265	5.983		48.2686	12.251	121.359
242367	92.3	1.2237	5.988		48.3524	12.2615	121.46
242568	92.32	1.22459	5.984		48.3629	12.2704	121.379
242769	92.38	1.22567	5.984		48.3943	12.2813	121.379
242969	92.42	1.22655	5.984		48.4153	12.2901	121.379
243169	92.32	1.22749	5.987		48.3629	12.2995	121.44
243369	92.52	1.22852	5.984		48.4676	12.3098	121.379
243570	92.62	1.22958	5.985		48.52	12.3204	121.4
243770	92.58	1.2306	5.981		48.4991	12.3307	121.318
243971	92.6	1.23149	5.985		48.5096	12.3396	121.4
244171	92.78	1.23233	5.986		48.6038	12.348	121.42
244371	92.88	1.23349	5.983		48.6562	12.3596	121.359
244572	92.96	1.23426	5.982		48.6981	12.3673	121.339
244772	92.98	1.23536	5.985		48.7086	12.3784	121.4
244973	93.08	1.23622	5.983		48.761	12.387	121.359
245173	93.08	1.23722	5.985		48.761	12.397	121.4
245373	93.2	1.23818	5.984		48.8239	12.4066	121.379
245575	93.3	1.23924	5.988		48.8763	12.4172	121.46
245776	93.36	1.24012	5.982		48.9077	12.4261	121.339
245977	93.36	1.24132	5.981		48.9077	12.4381	121.318
246177	93.46	1.24239	5.987		48.9601	12.4488	121.44
246377	93.52	1.24337	5.984		48.9915	12.4586	121.379
246577	93.46	1.24429	5.984		48.9601	12.4678	121.379
246778	93.68	1.24531	5.985		49.0753	12.4781	121.4
246978	93.56	1.24635	5.984		49.0125	12.4885	121.379
247179	93.68	1.24731	5.986		49.0753	12.4981	121.42
247379	93.86	1.24835	5.984		49.1696	12.5085	121.379
247579	93.92	1.24933	5.986		49.201	12.5183	121.42
247780	93.9	1.25043	5.985		49.1906	12.5294	121.4
247980	94	1.2514	5.983		49.243	12.5391	121.359
248181	94.04	1.25239	5.982		49.2639	12.549	121.339
248381	94.04	1.25349	5.985		49.2639	12.56	121.4
248581	94.08	1.25447	5.986		49.2849	12.5698	121.42
248783	94.16	1.25544	5.987		49.3268	12.5796	121.44
248984	94.26	1.25631	5.985		49.3792	12.5883	121.4
249185	94.28	1.2573	5.985		49.3896	12.5982	121.4
249385	94.36	1.25827	5.988		49.4315	12.6079	121.46
249585	94.42	1.25915	5.983		49.463	12.6167	121.359
249785	94.44	1.26025	5.985		49.4735	12.6278	121.4
249986	94.4	1.26106	5.985		49.4525	12.6359	121.4
250186	94.56	1.2621	5.983		49.5363	12.6463	121.359
250387	94.62	1.26298	5.988		49.5678	12.6551	121.46
250587	94.68	1.26406	5.983		49.5992	12.6659	121.359
250787	94.82	1.26501	5.983		49.6725	12.6755	121.359
250988	94.82	1.26611	5.984		49.6725	12.6865	121.379
251188	94.82	1.26711	5.984		49.6725	12.6965	121.379
251389	94.92	1.26808	5.985		49.7249	12.7062	121.4
251589	95.06	1.26913	5.988		49.7983	12.7167	121.46
251789	95.06	1.27003	5.984		49.7983	12.7258	121.379
251991	95.1	1.27111	5.984		49.8192	12.7366	121.379
252192	95.16	1.27199	5.985		49.8506	12.7454	121.4
252393	95.2	1.27288	5.984		49.8716	12.7543	121.379
252593	95.34	1.27373	5.987		49.9449	12.7628	121.44
252793	95.36	1.27472	5.988		49.9554	12.7727	121.46
252993	95.4	1.27581	5.983		49.9764	12.7837	121.359
253194	95.54	1.27666	5.985		50.0497	12.7922	121.4
253395	95.54	1.27766	5.984		50.0497	12.8022	121.379
253595	95.62	1.27853	5.985		50.0916	12.8109	121.4
253795	95.64	1.27953	5.981		50.1021	12.8209	121.318
253995	95.7	1.28061	5.986		50.1335	12.8318	121.42
254196	95.74	1.28159	5.985		50.1545	12.8416	121.4
254396	95.82	1.28246	5.983		50.1964	12.8503	121.359
254597	95.82	1.28356	5.982		50.1964	12.8613	121.339
254797	95.88	1.28454	5.985		50.2278	12.8711	121.4
254997	96.02	1.28559	5.983		50.3012	12.8817	121.359
255198	96.02	1.28669	5.981		50.3012	12.8927	121.318
255398	96.16	1.28754	5.987		50.3745	12.9012	121.44
255599	96.16	1.28864	5.982		50.3745	12.9122	121.339
255799	96.2	1.28963	5.985		50.3955	12.9221	121.4
255999	96.3	1.2905	5.984		50.4478	12.9309	121.379
256201	96.34	1.29148	5.985		50.4688	12.9407	121.4
256402	96.42	1.29245	5.982		50.5107	12.9504	121.339
256603	96.42	1.29335	5.985		50.5107	12.9594	121.4
256803	96.52	1.29432	5.987		50.5631	12.9691	121.44
257003	96.52	1.29532	5.988		50.5631	12.9792	121.46
257203	96.6	1.29639	5.982		50.605	12.9899	121.339
257404	96.58	1.2974	5.981		50.5945	13	121.318
257604	96.76	1.29803	5.988		50.6888	13.0063	121.46
257805	96.68	1.29916	5.982		50.6469	13.0176	121.339
258005	96.84	1.30001	5.984		50.7307	13.0262	121.379
258205	96.94	1.30097	5.987		50.7831	13.0358	121.44
258406	97.02	1.30204	5.987		50.825	13.0465	121.44
258606	96.94	1.30297	5.982		50.7831	13.0558	121.339
258807	97.02	1.30414	5.988		50.825	13.0675	121.46
259007	97.08	1.30532	5.985		50.8565	13.0794	121.4
259207	97.24	1.30637	5.983		50.9403	13.0899	121.359
259409	97.26	1.30746	5.987		50.9507	13.1008	121.44
259610	97.4	1.30851	5.984		51.0241	13.1113	121.379
259811	97.42	1.3094	5.986		51.0346	13.1202	121.42
260011	97.52	1.31047	5.986		51.0869	13.131	121.42
260211	97.54	1.31136	5.985		51.0974	13.1399	121.4
260411	97.64	1.31243	5.983		51.1498	13.1506	121.359
260612	97.62	1.31343	5.985		51.1393	13.1606	121.4
260812	97.72	1.3144	5.985		51.1917	13.1703	121.4
261013	97.72	1.3153	5.984		51.1917	13.1794	121.379
261213	97.68	1.31631	5.983		51.1708	13.1895	121.359
261413	97.82	1.31726	5.986		51.2441	13.199	121.42
261614	97.86	1.31825	5.984		51.2651	13.2089	121.379
261814	97.98	1.31921	5.982		51.3279	13.2185	121.339
262015	97.96	1.32011	5.982		51.3174	13.2276	121.339
262215	98.04	1.32119	5.983		51.3594	13.2384	121.359
262415	98.04	1.32219	5.985		51.3594	13.2484	121.4
262617	98.08	1.32307	5.987		51.3803	13.2572	121.44
262818	98.14	1.32395	5.987		51.4117	13.266	121.44
263019	98.24	1.32492	5.986		51.4641	13.2758	121.42
263219	98.34	1.32608	5.984		51.5165	13.2874	121.379
263419	98.4	1.32696	5.984		51.5479	13.2962	121.379
263619	98.28	1.328	5.982		51.4851	13.3066	121.339
263820	98.42	1.32885	5.986		51.5584	13.3151	121.42
264020	98.46	1.32974	5.985		51.5794	13.324	121.4
264221	98.52	1.33062	5.984		51.6108	13.3329	121.379
264421	98.66	1.33167	5.987		51.6842	13.3434	121.44
264621	98.66	1.33267	5.987		51.6842	13.3534	121.44
264822	98.74	1.33364	5.985		51.7261	13.3631	121.4
265022	98.88	1.33479	5.985		51.7994	13.3746	121.4
265223	98.9	1.33578	5.985		51.8099	13.3846	121.4
265423	98.84	1.33661	5.985		51.7784	13.3929	121.4
265623	98.96	1.33766	5.985		51.8413	13.4034	121.4
265825	99.02	1.33854	5.987		51.8727	13.4122	121.44
266026	98.98	1.33966	5.983		51.8518	13.4234	121.359
266227	99	1.34065	5.984		51.8623	13.4334	121.379
266427	99.1	1.34151	5.982		51.9147	13.442	121.339
266627	99.08	1.34252	5.982		51.9042	13.4521	121.339
266827	99.18	1.34349	5.982		51.9566	13.4618	121.339
267028	99.28	1.34425	5.985		52.0089	13.4694	121.4
267228	99.34	1.34533	5.984		52.0404	13.4803	121.379
267429	99.48	1.34628	5.984		52.1137	13.4898	121.379
267629	99.5	1.34718	5.986		52.1242	13.4988	121.42
267829	99.56	1.34815	5.984		52.1556	13.5085	121.379
268030	99.72	1.3492	5.984		52.2394	13.519	121.379
268230	99.74	1.35019	5.987		52.2499	13.529	121.44
268431	99.86	1.35115	5.986		52.3128	13.5386	121.42
268631	99.86	1.35235	5.985		52.3128	13.5506	121.4
268831	99.88	1.35334	5.988		52.3233	13.5605	121.46
269033	99.92	1.35433	5.986		52.3442	13.5704	121.42
269234	99.98	1.35531	5.987		52.3756	13.5803	121.44
269435	100.04	1.35619	5.984		52.4071	13.5891	121.379
269635	100.12	1.35726	5.986		52.449	13.5998	121.42
269835	100.2	1.35843	5.983		52.4909	13.6115	121.359
270035	100.2	1.35953	5.985		52.4909	13.6225	121.4
270236	100.3	1.3607	5.985		52.5433	13.6343	121.4
270436	100.4	1.36166	5.985		52.5957	13.6439	121.4
270637	100.5	1.36252	5.984		52.6481	13.6525	121.379
270837	100.48	1.36353	5.987		52.6376	13.6626	121.44
271037	100.5	1.36462	5.982		52.6481	13.6735	121.339
271238	100.58	1.3654	5.985		52.69	13.6814	121.4
271438	100.5	1.36643	5.987		52.6481	13.6917	121.44
271639	100.6	1.36749	5.987		52.7004	13.7023	121.44
271839	100.6	1.36849	5.982		52.7004	13.7123	121.339
272039	100.68	1.36936	5.983		52.7424	13.721	121.359
272241	100.7	1.37036	5.986		52.7528	13.7311	121.42
272442	100.84	1.37131	5.982		52.8262	13.7406	121.339
272643	100.92	1.37218	5.983		52.8681	13.7493	121.359
272843	101	1.37315	5.983		52.91	13.759	121.359
273043	101.06	1.37413	5.985		52.9414	13.7688	121.4
273243	101.06	1.37513	5.983		52.9414	13.7789	121.359
273444	101.08	1.37612	5.985		52.9519	13.7888	121.4
273645	101.08	1.37702	5.985		52.9519	13.7978	121.4
273845	101.24	1.37797	5.985		53.0357	13.8073	121.4
274045	101.34	1.37883	5.984		53.0881	13.8159	121.379
274245	101.32	1.37994	5.987		53.0776	13.8271	121.44
274446	101.34	1.38103	5.986		53.0881	13.838	121.42
274646	101.48	1.38188	5.983		53.1614	13.8465	121.359
274847	101.56	1.38265	5.986		53.2033	13.8542	121.42
275047	101.56	1.38375	5.986		53.2033	13.8652	121.42
275247	101.5	1.38478	5.984		53.1719	13.8756	121.379
275448	101.54	1.38576	5.985		53.1929	13.8854	121.4
275648	101.68	1.38661	5.985		53.2662	13.8939	121.4
275849	101.68	1.38751	5.985		53.2662	13.9029	121.4
276049	101.78	1.38868	5.985		53.3186	13.9146	121.4
276249	101.8	1.38947	5.984		53.3291	13.9225	121.379
276451	101.84	1.39056	5.986		53.35	13.9335	121.42
276652	101.82	1.39146	5.981		53.3396	13.9425	121.318
276853	101.86	1.39255	5.988		53.3605	13.9534	121.46
277053	101.94	1.39332	5.982		53.4024	13.9611	121.339
277253	102.06	1.39438	5.988		53.4653	13.9717	121.46
277453	102.18	1.39524	5.984		53.5281	13.9804	121.379
277654	102.28	1.3961	5.985		53.5805	13.989	121.4
277854	102.28	1.3972	5.986		53.5805	14	121.42
278055	102.3	1.3981	5.983		53.591	14.009	121.359
278255	102.38	1.39917	5.985		53.6329	14.0197	121.4
278455	102.36	1.40017	5.986		53.6224	14.0298	121.42
278656	102.44	1.40135	5.986		53.6643	14.0416	121.42
278856	102.5	1.40223	5.986		53.6958	14.0504	121.42
279057	102.58	1.4032	5.986		53.7377	14.0601	121.42
279257	102.56	1.4044	5.985		53.7272	14.0721	121.4
279457	102.72	1.40535	5.985		53.811	14.0817	121.4
279659	102.82	1.40641	5.984		53.8634	14.0923	121.379
279860	102.78	1.40743	5.983		53.8425	14.1025	121.359
280061	102.8	1.40832	5.981		53.8529	14.1114	121.318
280261	102.94	1.40937	5.983		53.9263	14.1219	121.359
280461	102.94	1.41037	5.986		53.9263	14.132	121.42
280661	103	1.41135	5.987		53.9577	14.1418	121.44
280862	103.02	1.41234	5.986		53.9682	14.1517	121.42
281062	103.1	1.41322	5.985		54.0101	14.1605	121.4
281263	103.08	1.41422	5.987		53.9996	14.1705	121.44
281463	103.24	1.41527	5.986		54.0834	14.1811	121.42
281663	103.28	1.41605	5.983		54.1044	14.1889	121.359
281864	103.32	1.41714	5.986		54.1253	14.1998	121.42
282064	103.38	1.41792	5.981		54.1568	14.2076	121.318
282265	103.4	1.41901	5.986		54.1673	14.2185	121.42
282465	103.48	1.41998	5.987		54.2092	14.2283	121.44
282665	103.44	1.4208	5.985		54.1882	14.2365	121.4
282867	103.52	1.42187	5.982		54.2301	14.2472	121.339
283068	103.58	1.42285	5.982		54.2615	14.257	121.339
283269	103.6	1.42394	5.986		54.272	14.2679	121.42
283469	103.74	1.42489	5.987		54.3454	14.2775	121.44
283669	103.82	1.42596	5.987		54.3873	14.2882	121.44
283869	103.8	1.42687	5.984		54.3768	14.2973	121.379
284070	103.86	1.42795	5.985		54.4082	14.3081	121.4
284270	103.92	1.42903	5.985		54.4397	14.3189	121.4
284471	104.06	1.42988	5.983		54.513	14.3275	121.359
284671	104.06	1.43078	5.987		54.513	14.3365	121.44
284871	104.06	1.43188	5.983		54.513	14.3475	121.359
285072	104.12	1.43286	5.986		54.5444	14.3573	121.42
285272	104.1	1.43376	5.983		54.534	14.3663	121.359
285473	104.26	1.43471	5.982		54.6178	14.3759	121.339
285673	104.28	1.4359	5.985		54.6283	14.3878	121.4
285873	104.38	1.43667	5.985		54.6806	14.3955	121.4
286075	104.48	1.43763	5.985		54.733	14.4051	121.4
286276	104.44	1.43875	5.985		54.7121	14.4163	121.4
286477	104.56	1.4398	5.983		54.7749	14.4269	121.359
286677	104.62	1.44088	5.985		54.8064	14.4377	121.4
286877	104.66	1.44177	5.988		54.8273	14.4466	121.46
287077	104.72	1.44285	5.985		54.8588	14.4574	121.4
287278	104.64	1.44388	5.987		54.8168	14.4677	121.44
287478	104.68	1.44476	5.987		54.8378	14.4766	121.44
287679	104.84	1.44571	5.984		54.9216	14.4861	121.379
287879	104.78	1.44683	5.984		54.8902	14.4973	121.379
288079	104.94	1.44767	5.985		54.974	14.5057	121.4
288280	105	1.44865	5.985		55.0054	14.5155	121.4
288480	105.06	1.44963	5.983		55.0369	14.5254	121.359
288681	105.1	1.45052	5.984		55.0578	14.5343	121.379
288881	105.06	1.45153	5.985		55.0369	14.5444	121.4
289081	105.18	1.45249	5.985		55.0997	14.554	121.4
289283	105.2	1.45358	5.983		55.1102	14.5649	121.359
289484	105.24	1.45457	5.982		55.1312	14.5748	121.339
289685	105.26	1.45546	5.983		55.1416	14.5838	121.359
289885	105.28	1.45635	5.985		55.1521	14.5927	121.4
290085	105.42	1.4573	5.986		55.2255	14.6022	121.42
290285	105.32	1.45824	5.984		55.1731	14.6116	121.379
290486	105.52	1.45927	5.986		55.2778	14.6219	121.42
290686	105.62	1.46023	5.986		55.3302	14.6316	121.42
290887	105.58	1.46135	5.985		55.3093	14.6428	121.4
291087	105.58	1.46225	5.986		55.3093	14.6518	121.42
291287	105.72	1.4632	5.986		55.3826	14.6613	121.42
291488	105.78	1.46448	5.985		55.414	14.6741	121.4
291688	105.86	1.46555	5.985		55.456	14.6849	121.4
291889	105.98	1.46671	5.982		55.5188	14.6965	121.339
292089	106.02	1.46779	5.985		55.5398	14.7073	121.4
292289	106.02	1.46859	5.985		55.5398	14.7153	121.4
292491	106.06	1.46978	5.983		55.5607	14.7273	121.359
292692	106.04	1.47069	5.984		55.5502	14.7364	121.379
292893	106.12	1.47156	5.986		55.5922	14.7451	121.42
293093	106.18	1.47254	5.986		55.6236	14.7549	121.42
293293	106.16	1.47344	5.986		55.6131	14.7639	121.42
293493	106.2	1.47453	5.984		55.6341	14.7748	121.379
293694	106.24	1.47542	5.983		55.655	14.7838	121.359
293895	106.28	1.4764	5.984		55.676	14.7936	121.379
294095	106.38	1.47747	5.986		55.7284	14.8043	121.42
294295	106.42	1.47835	5.985		55.7493	14.8131	121.4
294495	106.34	1.47928	5.986		55.7074	14.8224	121.42
294696	106.4	1.48016	5.981		55.7388	14.8313	121.318
294896	106.42	1.48115	5.983		55.7493	14.8412	121.359
295097	106.56	1.4822	5.983		55.8227	14.8517	121.359
295297	106.52	1.48322	5.987		55.8017	14.8619	121.44
295497	106.64	1.48418	5.982		55.8646	14.8715	121.339
295698	106.62	1.48518	5.986		55.8541	14.8816	121.42
295898	106.7	1.48615	5.981		55.896	14.8913	121.318
296099	106.8	1.48712	5.985		55.9484	14.901	121.4
296299	106.72	1.48825	5.981		55.9065	14.9123	121.318
296499	106.86	1.4892	5.986		55.9798	14.9218	121.42
296701	106.98	1.49016	5.988		56.0427	14.9315	121.46
296902	106.98	1.49106	5.985		56.0427	14.9405	121.4
297103	106.96	1.49206	5.985		56.0322	14.9505	121.4
297303	107.16	1.49289	5.984		56.137	14.9588	121.379
297503	107.16	1.49389	5.985		56.137	14.9688	121.4
297703	107.22	1.49497	5.985		56.1684	14.9797	121.4
297904	107.28	1.49585	5.988		56.1998	14.9885	121.46
298104	107.22	1.49677	5.982		56.1684	14.9977	121.339
298305	107.32	1.49784	5.984		56.2208	15.0084	121.379
298505	107.32	1.49884	5.985		56.2208	15.0184	121.4
298705	107.54	1.49966	5.985		56.336	15.0267	121.4
298906	107.56	1.50075	5.986		56.3465	15.0376	121.42
299106	107.48	1.50168	5.984		56.3046	15.0469	121.379
299307	107.6	1.50274	5.985		56.3675	15.0575	121.4
299507	107.6	1.50364	5.986		56.3675	15.0665	121.42
299707	107.72	1.5046	5.983		56.4303	15.0762	121.359
299909	107.78	1.50558	5.987		56.4618	15.086	121.44
300110	107.8	1.50657	5.987		56.4722	15.0959	121.44
300311	107.8	1.50757	5.985		56.4722	15.1059	121.4
300511	107.82	1.50846	5.986		56.4827	15.1148	121.42
300711	107.9	1.50953	5.983		56.5246	15.1256	121.359
300911	108.06	1.51038	5.987		56.6084	15.1341	121.44
301112	107.98	1.51151	5.983		56.5665	15.1454	121.359
301312	108.06	1.51238	5.985		56.6084	15.1541	121.4
301513	108.06	1.51348	5.982		56.6084	15.1651	121.339
301713	108.16	1.51434	5.985		56.6608	15.1737	121.4
301913	108.16	1.51544	5.985		56.6608	15.1848	121.4
302114	108.32	1.51629	5.985		56.7447	15.1933	121.4
302314	108.24	1.51742	5.985		56.7027	15.2046	121.4
302515	108.38	1.51827	5.986		56.7761	15.2131	121.42
302715	108.38	1.51927	5.983		56.7761	15.2231	121.359
302915	108.42	1.52015	5.984		56.797	15.232	121.379
303117	108.5	1.52113	5.983		56.8389	15.2418	121.359
303318	108.54	1.52221	5.986		56.8599	15.2526	121.42
303519	108.64	1.52328	5.987		56.9123	15.2633	121.44
303719	108.66	1.52427	5.982		56.9228	15.2732	121.339
303919	108.64	1.52528	5.985		56.9123	15.2834	121.4
304119	108.8	1.52632	5.984		56.9961	15.2938	121.379
304320	108.86	1.5273	5.985		57.0275	15.3036	121.4
304520	108.8	1.52822	5.985		56.9961	15.3128	121.4
304721	108.88	1.52949	5.983		57.038	15.3256	121.359
304921	108.86	1.5303	5.987		57.0275	15.3337	121.44
305121	109.02	1.53124	5.984		57.1114	15.3431	121.379
305322	109	1.53225	5.986		57.1009	15.3532	121.42
305522	109.1	1.53331	5.985		57.1533	15.3638	121.4
305723	109.14	1.5343	5.981		57.1742	15.3737	121.318
305923	109.24	1.53517	5.984		57.2266	15.3825	121.379
306123	109.28	1.53635	5.987		57.2476	15.3943	121.44
306325	109.3	1.53725	5.984		57.258	15.4033	121.379
306526	109.3	1.53824	5.988		57.258	15.4132	121.46
306727	109.36	1.53922	5.988		57.2895	15.423	121.46
306927	109.42	1.5402	5.983		57.3209	15.4329	121.359
307127	109.56	1.54125	5.987		57.3942	15.4434	121.44
307327	109.52	1.54217	5.983		57.3733	15.4526	121.359
307528	109.52	1.54307	5.986		57.3733	15.4616	121.42
307728	109.66	1.54412	5.984		57.4466	15.4721	121.379
307929	109.56	1.54505	5.985		57.3942	15.4815	121.4
308129	109.52	1.54617	5.984		57.3733	15.4927	121.379
308329	109.6	1.54704	5.986		57.4152	15.5014	121.42
308530	109.56	1.54805	5.984		57.3942	15.5115	121.379
308730	109.6	1.54904	5.984		57.4152	15.5214	121.379
308931	109.76	1.54998	5.985		57.499	15.5309	121.4
309131	109.74	1.55089	5.985		57.4885	15.54	121.4
309331	109.78	1.55178	5.986		57.5095	15.5489	121.42
309533	109.86	1.55295	5.983		57.5514	15.5606	121.359
309734	109.92	1.55413	5.986		57.5828	15.5724	121.42
309935	110.04	1.55529	5.983		57.6457	15.5841	121.359
310135	110.06	1.55638	5.987		57.6562	15.595	121.44
310335	110.04	1.55739	5.984		57.6457	15.6051	121.379
310535	110.18	1.55834	5.985		57.719	15.6146	121.4
310736	110.18	1.55934	5.987		57.719	15.6246	121.44
310936	110.3	1.56029	5.986		57.7819	15.6342	121.42
311137	110.34	1.56128	5.986		57.8029	15.6441	121.42
311337	110.32	1.56229	5.985		57.7924	15.6542	121.4
311537	110.48	1.56323	5.985		57.8762	15.6636	121.4
311738	110.48	1.56423	5.986		57.8762	15.6736	121.42
311938	110.48	1.56523	5.984		57.8762	15.6837	121.379
312139	110.44	1.56615	5.983		57.8552	15.6929	121.359
312339	110.58	1.5671	5.986		57.9286	15.7024	121.42
312539	110.52	1.56822	5.985		57.8971	15.7136	121.4
312741	110.52	1.56912	5.986		57.8971	15.7226	121.42
312942	110.46	1.57014	5.987		57.8657	15.7329	121.44
313143	110.6	1.57089	5.983		57.9391	15.7404	121.359
313343	110.72	1.57195	5.985		58.0019	15.751	121.4
313543	110.82	1.57291	5.984		58.0543	15.7606	121.379
313743	110.78	1.57383	5.984		58.0333	15.7698	121.379
313944	110.84	1.57481	5.985		58.0648	15.7797	121.4
314145	110.86	1.5758	5.985		58.0753	15.7896	121.4
314345	110.94	1.57697	5.989		58.1172	15.8013	121.481
314545	110.96	1.57786	5.984		58.1276	15.8102	121.379
314745	110.96	1.57896	5.986		58.1276	15.8212	121.42
314946	111.02	1.57984	5.986		58.1591	15.8301	121.42
315146	111.16	1.58079	5.984		58.2324	15.8396	121.379
315347	111.12	1.58191	5.987		58.2115	15.8508	121.44
315547	111.2	1.58278	5.985		58.2534	15.8595	121.4
315747	111.2	1.58388	5.985		58.2534	15.8705	121.4
315948	111.24	1.58477	5.983		58.2743	15.8795	121.359
316148	111.24	1.58567	5.985		58.2743	15.8885	121.4
316349	111.42	1.5867	5.985		58.3686	15.8988	121.4
316549	111.32	1.58754	5.987		58.3162	15.9072	121.44
316749	111.44	1.5887	5.98		58.3791	15.9188	121.298
316951	111.42	1.5896	5.986		58.3686	15.9279	121.42
317152	111.46	1.59049	5.983		58.3896	15.9368	121.359
317353	111.56	1.59145	5.986		58.442	15.9464	121.42
317553	111.54	1.59246	5.987		58.4315	15.9565	121.44
317753	111.5	1.59358	5.984		58.4105	15.9677	121.379
317953	111.6	1.59444	5.985		58.4629	15.9764	121.4
318154	111.68	1.59541	5.984		58.5048	15.9861	121.379
318354	111.74	1.59659	5.983		58.5363	15.9979	121.359
318555	111.8	1.59757	5.984		58.5677	16.0077	121.379
318755	111.78	1.59848	5.983		58.5572	16.0168	121.359
318955	111.76	1.59948	5.985		58.5467	16.0269	121.4
319156	111.96	1.60061	5.985		58.6515	16.0382	121.4
319356	111.98	1.60141	5.982		58.662	16.0462	121.339
319557	111.98	1.60251	5.984		58.662	16.0572	121.379
319757	112.04	1.60349	5.983		58.6934	16.067	121.359
319957	112.04	1.60449	5.985		58.6934	16.0771	121.4
320159	112.02	1.60539	5.987		58.6829	16.0861	121.44
320360	112.12	1.60626	5.987		58.7353	16.0948	121.44
320561	112.2	1.60743	5.986		58.7772	16.1065	121.42
320761	112.24	1.60832	5.981		58.7982	16.1154	121.318
320961	112.24	1.60922	5.987		58.7982	16.1244	121.44
321161	112.38	1.61017	5.986		58.8715	16.134	121.42
321362	112.28	1.6112	5.985		58.8191	16.1443	121.4
321562	112.32	1.61209	5.984		58.8401	16.1532	121.379
321763	112.32	1.61329	5.985		58.8401	16.1652	121.4
321963	112.46	1.61424	5.984		58.9134	16.1747	121.379
322163	112.48	1.61503	5.985		58.9239	16.1827	121.4
322364	112.54	1.61621	5.984		58.9553	16.1945	121.379
322564	112.56	1.6172	5.983		58.9658	16.2044	121.359
322765	112.54	1.61811	5.984		58.9553	16.2135	121.379
322965	112.66	1.61907	5.985		59.0182	16.2231	121.4
323165	112.68	1.61996	5.984		59.0287	16.2321	121.379
323367	112.72	1.62105	5.985		59.0496	16.243	121.4
323568	112.66	1.62217	5.986		59.0182	16.2542	121.42
323769	112.66	1.62307	5.987		59.0182	16.2632	121.44
323969	112.76	1.62403	5.983		59.0706	16.2728	121.359
324169	112.72	1.62505	5.988		59.0496	16.2831	121.46
324369	112.76	1.62603	5.986		59.0706	16.2929	121.42
324570	112.8	1.62692	5.989		59.0915	16.3018	121.481
324770	112.94	1.62787	5.986		59.1649	16.3113	121.42
324971	112.96	1.62906	5.984		59.1754	16.3232	121.379
325171	112.94	1.62987	5.984		59.1649	16.3314	121.379
325371	112.94	1.63087	5.985		59.1649	16.3414	121.4
325572	113	1.63185	5.987		59.1963	16.3512	121.44
325772	113.04	1.63274	5.986		59.2173	16.3601	121.42
325973	113.04	1.63364	5.985		59.2173	16.3691	121.4
326173	113.06	1.63473	5.985		59.2278	16.3801	121.4
326373	113.16	1.63559	5.984		59.2801	16.3887	121.379
326575	113.12	1.63661	5.983		59.2592	16.3989	121.359
326776	113.34	1.63763	5.982		59.3744	16.4091	121.339
326977	113.36	1.63862	5.982		59.3849	16.419	121.339
327177	113.42	1.6397	5.986		59.4163	16.4299	121.42
327377	113.4	1.64071	5.983		59.4059	16.44	121.359
327577	113.3	1.64184	5.984		59.3535	16.4513	121.379
327778	113.34	1.64293	5.983		59.3744	16.4622	121.359
327978	113.4	1.64381	5.982		59.4059	16.471	121.339
328179	113.52	1.64477	5.985		59.4687	16.4807	121.4
328379	113.6	1.64574	5.986		59.5106	16.4904	121.42
328579	113.56	1.64685	5.985		59.4897	16.5015	121.4
328780	113.7	1.6476	5.984		59.563	16.509	121.379
328980	113.7	1.64871	5.986		59.563	16.5201	121.42
329181	113.78	1.64968	5.986		59.6049	16.5299	121.42
329381	113.74	1.65069	5.985		59.584	16.54	121.4
329581	113.88	1.65164	5.986		59.6573	16.5495	121.42
329783	113.92	1.65253	5.984		59.6783	16.5584	121.379
329984	114.04	1.65359	5.985		59.7411	16.569	121.4
330185	113.94	1.65552	5.989		59.6888	16.5884	121.481
330385	107.54	1.65846	5.98		56.336	16.6178	121.298
330585	107.4	1.66081	5.984		56.2627	16.6414	121.379
330785	109.14	1.6615	5.99		57.1742	16.6483	121.501
330986	108.72	1.66045	5.988		56.9542	16.6378	121.46
331186	108.72	1.66045	5.988		56.9542	16.6378	121.46
331387	108.72	1.66045	5.988		56.9542	16.6378	121.46
331587	108.72	1.66045	5.988		56.9542	16.6378	121.46
331787	109.18	1.66629	5.988		57.1952	16.6963	121.46
331988	108.72	1.66515	5.989		56.9542	16.6849	121.481
332188	108.72	1.66515	5.989		56.9542	16.6849	121.481
332389	108.72	1.66515	5.989		56.9542	16.6849	121.481
332589	109.12	1.66811	5.988		57.1637	16.7145	121.46
332789	109.12	1.66811	5.988		57.1637	16.7145	121.46
332991	109.12	1.66811	5.988		57.1637	16.7145	121.46
333192	109.12	1.66811	5.988		57.1637	16.7145	121.46
333393	109.12	1.66811	5.988		57.1637	16.7145	121.46
333593	109.12	1.66811	5.988		57.1637	16.7145	121.46
333793	109.34	1.67403	5.986		57.279	16.7738	121.42
333993	109.34	1.67403	5.986		57.279	16.7738	121.42
334194	109.84	1.67786	5.985		57.5409	16.8122	121.4
334395	108.78	1.67713	5.988		56.9856	16.8049	121.46
334595	108.78	1.67713	5.988		56.9856	16.8049	121.46
334795	108.78	1.67713	5.988		56.9856	16.8049	121.46
334995	108.78	1.67713	5.988		56.9856	16.8049	121.46
335196	108.44	1.68305	5.983		56.8075	16.8642	121.359
335396	108.44	1.68305	5.983		56.8075	16.8642	121.359
335597	108.44	1.68305	5.983		56.8075	16.8642	121.359
335797	109.72	1.6859	5.981		57.4781	16.8928	121.318
335997	109.92	1.68483	5.985		57.5828	16.8821	121.4
336198	109.92	1.68483	5.985		57.5828	16.8821	121.4
336398	109.92	1.68483	5.985		57.5828	16.8821	121.4
336599	109.92	1.68483	5.985		57.5828	16.8821	121.4
336799	110.08	1.69057	5.984		57.6666	16.9396	121.379
336999	109	1.68995	5.989		57.1009	16.9334	121.481
337201	109	1.68995	5.989		57.1009	16.9334	121.481
337402	109	1.68995	5.989		57.1009	16.9334	121.481
337603	109	1.68995	5.989		57.1009	16.9334	121.481
337803	108.5	1.69553	5.983		56.8389	16.9893	121.359
338003	108.5	1.69553	5.983		56.8389	16.9893	121.359
338203	108.5	1.69553	5.983		56.8389	16.9893	121.359
338404	108.5	1.69553	5.983		56.8389	16.9893	121.359
338604	108.5	1.69553	5.983		56.8389	16.9893	121.359
338805	108.5	1.69553	5.983		56.8389	16.9893	121.359
339005	108.5	1.69553	5.983		56.8389	16.9893	121.359
339205	109.66	1.70282	5.983		57.4466	17.0623	121.359
339406	109.3	1.70204	5.987		57.258	17.0545	121.44
339606	109.3	1.70204	5.987		57.258	17.0545	121.44
339807	109.3	1.70204	5.987		57.258	17.0545	121.44
340007	109.3	1.70204	5.987		57.258	17.0545	121.44
340207	109.3	1.70204	5.987		57.258	17.0545	121.44
340409	109.3	1.70204	5.987		57.258	17.0545	121.44
340610	109.3	1.70204	5.987		57.258	17.0545	121.44
340811	109.3	1.70204	5.987		57.258	17.0545	121.44
341011	109.3	1.70204	5.987		57.258	17.0545	121.44
341211	109.12	1.71111	5.984		57.1637	17.1454	121.379
341411	109.74	1.71349	5.985		57.4885	17.1692	121.4
341612	109.52	1.71297	5.99		57.3733	17.164	121.501
341812	109.66	1.71562	5.982		57.4466	17.1906	121.339
342013	109.76	1.71488	5.989		57.499	17.1832	121.481
342213	110	1.7175	5.983		57.6247	17.2094	121.359
342413	109.86	1.71675	5.983		57.5514	17.2019	121.359
342614	109.46	1.71949	5.987		57.3419	17.2294	121.44
342814	109.98	1.71881	5.988		57.6143	17.2225	121.46
343015	109.98	1.71881	5.988		57.6143	17.2225	121.46
343215	109.98	1.71881	5.988		57.6143	17.2225	121.46
343415	109.98	1.71881	5.988		57.6143	17.2225	121.46
343617	109.98	1.71881	5.988		57.6143	17.2225	121.46
343818	109.98	1.71881	5.988		57.6143	17.2225	121.46
344019	109.98	1.71881	5.988		57.6143	17.2225	121.46
344219	109.98	1.71881	5.988		57.6143	17.2225	121.46
344419	109.98	1.71881	5.988		57.6143	17.2225	121.46
344619	109.98	1.71881	5.988		57.6143	17.2225	121.46
344820	109.98	1.71881	5.988		57.6143	17.2225	121.46
345020	109.98	1.71881	5.988		57.6143	17.2225	121.46
345221	109.98	1.71881	5.988		57.6143	17.2225	121.46
345421	109.98	1.71881	5.988		57.6143	17.2225	121.46
345621	109.98	1.71881	5.988		57.6143	17.2225	121.46
345822	109.98	1.71881	5.988		57.6143	17.2225	121.46
346022	109.26	1.73736	5.984		57.2371	17.4084	121.379
346223	109.26	1.73736	5.984		57.2371	17.4084	121.379
346423	109.26	1.73736	5.984		57.2371	17.4084	121.379
346623	109.26	1.73736	5.984		57.2371	17.4084	121.379
346825	109.26	1.73736	5.984		57.2371	17.4084	121.379
347026	109.26	1.73736	5.984		57.2371	17.4084	121.379
347227	109.26	1.73736	5.984		57.2371	17.4084	121.379
347427	109.26	1.73736	5.984		57.2371	17.4084	121.379
347627	109.26	1.73736	5.984		57.2371	17.4084	121.379
347827	109.26	1.73736	5.984		57.2371	17.4084	121.379
348028	109.26	1.73736	5.984		57.2371	17.4084	121.379
348228	109.26	1.73736	5.984		57.2371	17.4084	121.379
348429	109.26	1.73736	5.984		57.2371	17.4084	121.379
348629	109.26	1.73736	5.984		57.2371	17.4084	121.379
348829	109.26	1.73736	5.984		57.2371	17.4084	121.379
349030	109.26	1.73736	5.984		57.2371	17.4084	121.379
349230	109.26	1.73736	5.984		57.2371	17.4084	121.379
349431	109.26	1.73736	5.984		57.2371	17.4084	121.379
349631	109.38	1.75292	5.986		57.2999	17.5643	121.42
349831	109.22	1.75637	5.98		57.2161	17.5989	121.298
350033	108.74	1.75534	5.989		56.9647	17.5886	121.481
350234	108.74	1.75534	5.989		56.9647	17.5886	121.481
350435	108.74	1.75534	5.989		56.9647	17.5886	121.481
350635	108.74	1.75534	5.989		56.9647	17.5886	121.481
350835	104.92	1.76578	5.992		54.9635	17.6932	121.542
350991	104.92	1.76578	5.992		54.9635	17.6932	121.542
351192	104.92	1.76578	5.992		54.9635	17.6932	121.542
351393	98.7	1.77336	5.986		51.7051	17.7691	121.42
351593	95.54	1.77266	5.986		50.0497	17.7621	121.42
351793	93.2	1.77238	5.98		48.8239	17.7593	121.298
351993	93.14	1.7724	5.98		48.7924	17.7595	121.298
352194	95.58	1.77305	5.983		50.0707	17.766	121.359
352395	95.58	1.77305	5.983		50.0707	17.766	121.359
352595	95.58	1.77305	5.983		50.0707	17.766	121.359
352795	95.58	1.77305	5.983		50.0707	17.766	121.359
352995	95.58	1.77305	5.983		50.0707	17.766	121.359
353196	95.58	1.77305	5.983		50.0707	17.766	121.359
353396	95.58	1.77305	5.983		50.0707	17.766	121.359
353597	95.58	1.77305	5.983		50.0707	17.766	121.359
353797	95.58	1.77305	5.983		50.0707	17.766	121.359
353997	95.58	1.77305	5.983		50.0707	17.766	121.359
354198	95.58	1.77305	5.983		50.0707	17.766	121.359
354398	95.58	1.77305	5.983		50.0707	17.766	121.359
354599	95.58	1.77305	5.983		50.0707	17.766	121.359
354799	95.58	1.77305	5.983		50.0707	17.766	121.359
354999	95.58	1.77305	5.983		50.0707	17.766	121.359
355201	95.58	1.77305	5.983		50.0707	17.766	121.359
355402	95.12	1.78921	5.98		49.8297	17.928	121.298
355603	95.12	1.78921	5.98		49.8297	17.928	121.298
355803	94.7	1.79066	5.981		49.6097	17.9425	121.318
356003	94.7	1.79066	5.981		49.6097	17.9425	121.318
356203	95	1.79325	5.979		49.7668	17.9684	121.278
356404	95	1.79325	5.979		49.7668	17.9684	121.278
356604	94.9	1.79448	5.979		49.7144	17.9808	121.278
356805	94.9	1.79448	5.979		49.7144	17.9808	121.278
357005	94.92	1.79688	5.982		49.7249	18.0048	121.339
357205	94.92	1.79688	5.982		49.7249	18.0048	121.339
357406	95.48	1.79818	5.981		50.0183	18.0178	121.318
357606	95.48	1.79818	5.981		50.0183	18.0178	121.318
357807	96.02	1.80109	5.979		50.3012	18.047	121.278
358007	96.02	1.80109	5.979		50.3012	18.047	121.278
358207	97.22	1.80157	5.981		50.9298	18.0518	121.318
358409	97.22	1.80157	5.981		50.9298	18.0518	121.318
358610	97.22	1.80157	5.981		50.9298	18.0518	121.318
358811	97.22	1.80157	5.981		50.9298	18.0518	121.318
359011	96.9	1.80648	5.983		50.7622	18.101	121.359
359211	96.9	1.80648	5.983		50.7622	18.101	121.359
359411	97.56	1.80845	5.981		51.1079	18.1207	121.318
359612	97.56	1.80845	5.981		51.1079	18.1207	121.318
359812	97.56	1.80845	5.981		51.1079	18.1207	121.318
360013	98.06	1.80938	5.989		51.3698	18.1301	121.481
360213	99.36	1.81202	5.983		52.0509	18.1565	121.359
360413	99.18	1.81039	5.99		51.9566	18.1402	121.501
360614	99.18	1.81039	5.99		51.9566	18.1402	121.501
360814	99.48	1.81248	5.989		52.1137	18.1611	121.481
361015	99.48	1.81248	5.989		52.1137	18.1611	121.481
361215	99.62	1.81443	5.989		52.1871	18.1807	121.481
361415	99.62	1.81443	5.989		52.1871	18.1807	121.481
361617	99.96	1.81641	5.991		52.3652	18.2005	121.521
361818	99.96	1.81641	5.991		52.3652	18.2005	121.521
362019	99.96	1.81641	5.991		52.3652	18.2005	121.521
362219	99.96	1.81641	5.991		52.3652	18.2005	121.521
362419	100.04	1.82029	5.989		52.4071	18.2394	121.481
362619	100.04	1.82029	5.989		52.4071	18.2394	121.481
362820	100.04	1.82029	5.989		52.4071	18.2394	121.481
363020	100.04	1.82029	5.989		52.4071	18.2394	121.481
363221	99.34	1.82483	5.987		52.0404	18.2849	121.44
363421	99.2	1.82788	5.982		51.967	18.3154	121.339
363621	99.2	1.82788	5.982		51.967	18.3154	121.339
363822	99.2	1.82788	5.982		51.967	18.3154	121.339
364022	99.26	1.82896	5.985		51.9985	18.3263	121.4
364223	100.4	1.83166	5.979		52.5957	18.3533	121.278
364423	100.06	1.83038	5.986		52.4176	18.3405	121.42
364623	100	1.8331	5.984		52.3861	18.3677	121.379
364825	100	1.8331	5.984		52.3861	18.3677	121.379
365026	100	1.8331	5.984		52.3861	18.3677	121.379
365227	100	1.8331	5.984		52.3861	18.3677	121.379
365427	100	1.8331	5.984		52.3861	18.3677	121.379
365627	100	1.8331	5.984		52.3861	18.3677	121.379
365827	100	1.8331	5.984		52.3861	18.3677	121.379
366028	99.62	1.83853	5.988		52.1871	18.4221	121.46
366228	99.62	1.83853	5.988		52.1871	18.4221	121.46
366429	96.88	1.84239	5.992		50.7517	18.4608	121.542
366629	95.58	1.84465	5.984		50.0707	18.4835	121.379
366829	95.6	1.84434	5.986		50.0811	18.4804	121.42
367030	95.6	1.84434	5.986		50.0811	18.4804	121.42
367230	95.2	1.84648	5.985		49.8716	18.5018	121.4
367431	95.2	1.84648	5.985		49.8716	18.5018	121.4
367631	94.92	1.84848	5.986		49.7249	18.5218	121.42
367831	94.92	1.84848	5.986		49.7249	18.5218	121.42
368033	95.18	1.85059	5.989		49.8611	18.543	121.481
368234	95.18	1.85059	5.989		49.8611	18.543	121.481
368435	95.02	1.85254	5.982		49.7773	18.5625	121.339
368635	95.02	1.85254	5.982		49.7773	18.5625	121.339
368835	95.28	1.85475	5.984		49.9135	18.5847	121.379
369035	95.28	1.85475	5.984		49.9135	18.5847	121.379
369236	95.14	1.8568	5.982		49.8402	18.6052	121.339
369436	95.14	1.8568	5.982		49.8402	18.6052	121.339
369637	95.46	1.85889	5.986		50.0078	18.6262	121.42
369837	95.46	1.85889	5.986		50.0078	18.6262	121.42
370037	95.24	1.86117	5.983		49.8925	18.649	121.359
370238	95.24	1.86117	5.983		49.8925	18.649	121.359
370438	95.82	1.86296	5.984		50.1964	18.6669	121.379
370639	95.82	1.86296	5.984		50.1964	18.6669	121.379
370839	95.88	1.86584	5.978		50.2278	18.6958	121.258
371039	95.88	1.86584	5.978		50.2278	18.6958	121.258
371241	96.46	1.86704	5.979		50.5317	18.7078	121.278
371442	96.46	1.86704	5.979		50.5317	18.7078	121.278
371643	97.9	1.86923	5.982		51.286	18.7298	121.339
371843	97.9	1.86923	5.982		51.286	18.7298	121.339
372043	97.9	1.86923	5.982		51.286	18.7298	121.339
372243	97.9	1.86923	5.982		51.286	18.7298	121.339
372444	97.84	1.87326	5.98		51.2546	18.7701	121.298
372645	97.84	1.87326	5.98		51.2546	18.7701	121.298
372845	98.7	1.87496	5.979		51.7051	18.7872	121.278
373045	98.7	1.87496	5.979		51.7051	18.7872	121.278
373245	98.44	1.87695	5.981		51.5689	18.8071	121.318
373446	98.44	1.87695	5.981		51.5689	18.8071	121.318
373646	98.28	1.8793	5.974		51.4851	18.8307	121.176
373847	98.28	1.8793	5.974		51.4851	18.8307	121.176
374047	98.76	1.88053	5.979		51.7365	18.843	121.278
374247	98.76	1.88053	5.979		51.7365	18.843	121.278
374448	98.76	1.88053	5.979		51.7365	18.843	121.278
374648	98.72	1.88205	5.987		51.7156	18.8582	121.44
374849	98.72	1.88205	5.987		51.7156	18.8582	121.44
375049	98.88	1.88399	5.989		51.7994	18.8777	121.481
375249	98.88	1.88399	5.989		51.7994	18.8777	121.481
375451	99.42	1.886	5.989		52.0823	18.8978	121.481
375652	99.42	1.886	5.989		52.0823	18.8978	121.481
375853	99.42	1.886	5.989		52.0823	18.8978	121.481
376053	99.42	1.886	5.989		52.0823	18.8978	121.481
376253	99.42	1.886	5.989		52.0823	18.8978	121.481
376453	99.42	1.886	5.989		52.0823	18.8978	121.481
376654	99.46	1.89179	5.988		52.1032	18.9558	121.46
376854	99.46	1.89179	5.988		52.1032	18.9558	121.46
377055	99.46	1.89179	5.988		52.1032	18.9558	121.46
377255	99.46	1.89179	5.988		52.1032	18.9558	121.46
377325	99.46	1.89179	5.988		52.1032	18.9558	121.46
377526	99.38	1.89752	5.993		52.0613	19.0132	121.562
377727	92.46	1.90314	5.977		48.4362	19.0695	121.237
377927	92.56	1.8999	5.98		48.4886	19.0371	121.298
378127	92.58	1.9025	5.98		48.4991	19.0631	121.298
378327	92.58	1.9025	5.98		48.4991	19.0631	121.298
378528	92.58	1.9025	5.98		48.4991	19.0631	121.298
378728	93.58	1.90395	5.988		49.0229	19.0777	121.46
378929	94.32	1.90599	5.979		49.4106	19.0981	121.278
379129	94.32	1.90599	5.979		49.4106	19.0981	121.278
379329	94.32	1.90599	5.979		49.4106	19.0981	121.278
379530	94.32	1.90599	5.979		49.4106	19.0981	121.278
379730	94.32	1.90599	5.979		49.4106	19.0981	121.278
379931	94.32	1.90599	5.979		49.4106	19.0981	121.278
380131	94.32	1.90599	5.979		49.4106	19.0981	121.278
380331	94.32	1.90599	5.979		49.4106	19.0981	121.278
380533	94.32	1.90599	5.979		49.4106	19.0981	121.278
380734	94.32	1.90599	5.979		49.4106	19.0981	121.278
380935	94.32	1.90599	5.979		49.4106	19.0981	121.278
381135	94.32	1.90599	5.979		49.4106	19.0981	121.278
381335	94.32	1.90599	5.979		49.4106	19.0981	121.278
381535	94.32	1.90599	5.979		49.4106	19.0981	121.278
381736	94.32	1.90599	5.979		49.4106	19.0981	121.278
381936	94.32	1.90599	5.979		49.4106	19.0981	121.278
382137	94.32	1.90599	5.979		49.4106	19.0981	121.278
382337	93.98	1.92211	5.989		49.2325	19.2596	121.481
382537	93.98	1.92211	5.989		49.2325	19.2596	121.481
382738	94.18	1.92414	5.986		49.3373	19.28	121.42
382938	94.18	1.92414	5.986		49.3373	19.28	121.42
383139	94.18	1.92414	5.986		49.3373	19.28	121.42
383339	94.18	1.92414	5.986		49.3373	19.28	121.42
383539	94.18	1.92414	5.986		49.3373	19.28	121.42
383741	94.18	1.92414	5.986		49.3373	19.28	121.42
383942	94.18	1.92414	5.986		49.3373	19.28	121.42
384143	94.18	1.92414	5.986		49.3373	19.28	121.42
384343	94.18	1.92414	5.986		49.3373	19.28	121.42
384543	94.18	1.92414	5.986		49.3373	19.28	121.42
384743	94.18	1.92414	5.986		49.3373	19.28	121.42
384944	94.18	1.92414	5.986		49.3373	19.28	121.42
385145	94.18	1.92414	5.986		49.3373	19.28	121.42
385345	94.18	1.92414	5.986		49.3373	19.28	121.42
385545	94.18	1.92414	5.986		49.3373	19.28	121.42
385745	94.18	1.92414	5.986		49.3373	19.28	121.42
385946	94.18	1.92414	5.986		49.3373	19.28	121.42
386146	94.18	1.92414	5.986		49.3373	19.28	121.42
386347	94.18	1.92414	5.986		49.3373	19.28	121.42
386547	94.18	1.92414	5.986		49.3373	19.28	121.42
386747	93.98	1.94541	5.982		49.2325	19.4931	121.339
386948	93.98	1.94541	5.982		49.2325	19.4931	121.339
387148	94.86	1.9478	5.98		49.6935	19.517	121.298
387349	95.74	1.94659	5.985		50.1545	19.5049	121.4
387549	96.06	1.94928	5.979		50.3221	19.5319	121.278
387749	96.06	1.94928	5.979		50.3221	19.5319	121.278
387951	96.06	1.94928	5.979		50.3221	19.5319	121.278
388152	96.06	1.94928	5.979		50.3221	19.5319	121.278
388353	96.2	1.95563	5.986		50.3955	19.5955	121.42
388553	96.2	1.95563	5.986		50.3955	19.5955	121.42
388753	96.2	1.95563	5.986		50.3955	19.5955	121.42
388953	95.78	1.95518	5.983		50.1754	19.591	121.359
389154	96.22	1.95702	5.986		50.4059	19.6094	121.42
389354	96.22	1.95702	5.986		50.4059	19.6094	121.42
389555	96.22	1.95702	5.986		50.4059	19.6094	121.42
389755	96.22	1.95702	5.986		50.4059	19.6094	121.42
389955	96.22	1.95702	5.986		50.4059	19.6094	121.42
390156	96.22	1.95702	5.986		50.4059	19.6094	121.42
390356	96.22	1.95702	5.986		50.4059	19.6094	121.42
390557	96.22	1.95702	5.986		50.4059	19.6094	121.42
390757	96.22	1.95702	5.986		50.4059	19.6094	121.42
390957	96.22	1.95702	5.986		50.4059	19.6094	121.42
391159	96.22	1.95702	5.986		50.4059	19.6094	121.42
391360	96.22	1.95702	5.986		50.4059	19.6094	121.42
391561	96.22	1.95702	5.986		50.4059	19.6094	121.42
391761	96.22	1.95702	5.986		50.4059	19.6094	121.42
391961	96.22	1.95702	5.986		50.4059	19.6094	121.42
392161	93.4	1.97301	5.979		48.9286	19.7696	121.278
392362	93.3	1.97734	6.002		48.8763	19.813	121.744
392562	85.94	1.97992	5.977		45.0206	19.8389	121.237
392763	85.58	1.97805	5.977		44.832	19.8201	121.237
392963	87.68	1.97931	5.981		45.9322	19.8328	121.318
393163	89.16	1.97799	5.987		46.7075	19.8195	121.44
393364	88.98	1.98076	5.981		46.6132	19.8473	121.318
393564	88.98	1.98076	5.981		46.6132	19.8473	121.318
393765	88.98	1.98076	5.981		46.6132	19.8473	121.318
393965	88.98	1.98076	5.981		46.6132	19.8473	121.318
394165	88.98	1.98076	5.981		46.6132	19.8473	121.318
394367	88.98	1.98076	5.981		46.6132	19.8473	121.318
394568	88.98	1.98076	5.981		46.6132	19.8473	121.318
394769	88.98	1.98076	5.981		46.6132	19.8473	121.318
394969	88.98	1.98076	5.981		46.6132	19.8473	121.318
395169	88.98	1.98076	5.981		46.6132	19.8473	121.318
395369	88.98	1.98076	5.981		46.6132	19.8473	121.318
395570	88.98	1.98076	5.981		46.6132	19.8473	121.318
395770	89.76	1.99068	5.986		47.0218	19.9467	121.42
395971	89.76	1.99068	5.986		47.0218	19.9467	121.42
396171	89.76	1.99068	5.986		47.0218	19.9467	121.42
396371	89.76	1.99068	5.986		47.0218	19.9467	121.42
396572	89.76	1.99068	5.986		47.0218	19.9467	121.42
396772	89.76	1.99068	5.986		47.0218	19.9467	121.42
396973	89.76	1.99068	5.986		47.0218	19.9467	121.42
397173	89.76	1.99068	5.986		47.0218	19.9467	121.42
397373	89.76	1.99068	5.986		47.0218	19.9467	121.42
397575	89.76	1.99068	5.986		47.0218	19.9467	121.42
397776	89.76	1.99068	5.986		47.0218	19.9467	121.42
[truncated: 77 more rows]

## Sheet: ZC-7-9
Time: 18:55:02,07/04/2019
diameter: 49.3	mm	height: 99.8	mm
Vertical 100kN force sensor (vertical force of test piece)
Control mode: force / confining pressure	waveform: slope
KN/s	Force end point: 17.740	KN	confining pressure rate: 0.500	MPa/s	confining pressure end point: 9.0080	MPa
time (ms)	vertical force (KN)	vertical deformation (mm)	confining pressure (MPa)		Stress (MPa)	axial strain	transverse strain
0	0	0	0		0	0	0
201	0	-0.0006	0.004		0	-0.00601202	0.0811359
401	0.14	-0.00035	0.003		0.0733406	-0.00350701	0.0608519
601	0.28	-0.0003	0.012		0.146681	-0.00300601	0.243408
801	0.48	-0.00017	0.022		0.251453	-0.00170341	0.446247
1003	0.44	-5e-05	0.027		0.230499	-0.000501002	0.547667
1203	0.82	0.00031	0.038		0.429566	0.00310621	0.770791
1403	0.94	0.00157	0.056		0.49243	0.0157315	1.1359
1603	1.18	0.00429	0.081		0.618156	0.042986	1.643
1803	1.36	0.00982	0.117		0.712451	0.0983968	2.37323
2003	1.5	0.01748	0.166		0.785792	0.17515	3.36714
2203	1.8	0.02677	0.216		0.94295	0.268236	4.38134
2403	1.98	0.03721	0.269		1.03725	0.372846	5.45639
2603	2.04	0.04869	0.315		1.06868	0.487876	6.38945
2803	2.22	0.06092	0.357		1.16297	0.610421	7.24138
3003	2.6	0.07829	0.396		1.36204	0.784469	8.03245
3203	2.98	0.09776	0.421		1.56111	0.979559	8.53955
3403	3.24	0.11637	0.441		1.69731	1.16603	8.94523
3603	3.34	0.12813	0.463		1.7497	1.28387	9.39148
3803	3.32	0.13894	0.478		1.73922	1.39218	9.69574
4003	3.54	0.14886	0.499		1.85447	1.49158	10.1217
4203	3.72	0.1556	0.534		1.94876	1.55912	10.8316
4403	3.98	0.16181	0.598		2.08497	1.62134	12.1298
4603	4.12	0.16596	0.748		2.15831	1.66293	15.1724
4803	4.48	0.16703	1.219		2.3469	1.67365	24.7262
5003	4.92	0.16688	2.083		2.5774	1.67214	42.2515
5203	4.72	0.16915	2.31		2.47263	1.69489	46.856
5403	4.88	0.17119	2.677		2.55644	1.71533	54.3002
5603	5.26	0.17726	2.788		2.75551	1.77615	56.5517
5803	5.64	0.18503	2.862		2.95458	1.85401	58.0527
6003	5.82	0.19276	2.964		3.04887	1.93146	60.1217
6203	5.98	0.19911	3.063		3.13269	1.99509	62.1298
6403	6.06	0.20208	3.161		3.1746	2.02485	64.1176
6603	6.08	0.20437	3.262		3.18508	2.0478	66.1663
6803	6.38	0.20887	3.362		3.34223	2.09289	68.1947
7003	6.78	0.21573	3.464		3.55178	2.16162	70.2637
7203	7	0.22205	3.562		3.66703	2.22495	72.2515
7403	7.16	0.22719	3.661		3.75085	2.27645	74.2596
7603	7.26	0.23046	3.764		3.80323	2.30922	76.3489
7803	7.4	0.23341	3.865		3.87657	2.33878	78.3976
8003	7.58	0.23625	3.96		3.97087	2.36723	80.3245
8203	7.7	0.23911	4.062		4.03373	2.39589	82.3935
8403	7.98	0.24301	4.164		4.18041	2.43497	84.4625
8603	8.24	0.24752	4.262		4.31662	2.48016	86.4503
8803	8.54	0.25211	4.359		4.47378	2.52615	88.4178
9003	8.76	0.25673	4.46		4.58902	2.57244	90.4665
9203	9	0.26125	4.562		4.71475	2.61774	92.5355
9403	9.24	0.26517	4.661		4.84048	2.65701	94.5436
9603	9.18	0.26739	4.763		4.80905	2.67926	96.6126
9803	9.3	0.26885	4.861		4.87191	2.69389	98.6004
10003	9.46	0.27069	4.963		4.95573	2.71232	100.669
10203	9.82	0.27516	5.062		5.14432	2.75711	102.677
10403	10.2	0.27993	5.161		5.34338	2.80491	104.686
10603	10.48	0.28443	5.26		5.49007	2.85	106.694
10803	10.4	0.28586	5.361		5.44816	2.86433	108.742
11003	10.48	0.28683	5.462		5.49007	2.87405	110.791
11203	10.82	0.29071	5.563		5.66818	2.91293	112.84
11403	11.28	0.29575	5.662		5.90915	2.96343	114.848
11603	11.36	0.29952	5.761		5.95106	3.0012	116.856
11803	11.44	0.301	5.863		5.99297	3.01603	118.925
12003	11.58	0.30255	5.963		6.06631	3.03156	120.953
12203	11.8	0.30407	6.06		6.18156	3.04679	122.921
12403	11.88	0.30664	6.162		6.22347	3.07255	124.99
12603	12.38	0.31197	6.261		6.4854	3.12595	126.998
12803	12.72	0.31585	6.363		6.66352	3.16483	129.067
13003	12.66	0.31787	6.462		6.63208	3.18507	131.075
13203	12.66	0.31787	6.562		6.63208	3.18507	133.103
13403	12.92	0.31978	6.661		6.76829	3.20421	135.112
13603	13.34	0.32433	6.764		6.98831	3.2498	137.201
13803	13.68	0.32871	6.859		7.16642	3.29369	139.128
14003	13.52	0.32917	6.959		7.0826	3.2983	141.156
14203	13.74	0.33019	7.06		7.19785	3.30852	143.205
14403	14.04	0.33359	7.16		7.35501	3.34259	145.233
14603	14.38	0.33707	7.261		7.53312	3.37745	147.282
14803	14.64	0.34038	7.353		7.66933	3.41062	149.148
15003	14.78	0.34373	7.46		7.74267	3.44419	151.318
15203	14.94	0.34637	7.561		7.82649	3.47064	153.367
15403	15.02	0.34814	7.662		7.8684	3.48838	155.416
15603	15.14	0.3496	7.762		7.93126	3.50301	157.444
15803	15.32	0.35094	7.865		8.02555	3.51643	159.533
16003	15.54	0.35266	7.961		8.1408	3.53367	161.481
16203	15.8	0.35507	8.061		8.27701	3.55782	163.509
16403	16.1	0.35867	8.161		8.43417	3.59389	165.538
16603	16.4	0.36186	8.259		8.59132	3.62585	167.525
16803	16.7	0.36435	8.363		8.74848	3.6508	169.635
17003	16.6	0.36489	8.459		8.6961	3.65621	171.582
17203	16.76	0.36573	8.558		8.77991	3.66463	173.59
17403	17.14	0.3697	8.661		8.97898	3.70441	175.68
17603	17.44	0.3739	8.758		9.13614	3.74649	177.647
17803	17.54	0.37566	8.865		9.18853	3.76413	179.817
18003	17.5	0.37678	8.962		9.16757	3.77535	181.785
18203	17.74	0.37819	9.008		9.2933	3.78948	182.718
控制模式:围压	波形:斜坡
MPa/s	终点:9.0030	MPa
时间(ms)	垂直力(KN)	垂直变形(mm)	围压(MPa)
18375	18.02	0.38089	9.003		9.43998	3.81653	182.617
控制模式:位移	波形:斜坡
mm/s	终点:2.2094	mm
时间(ms)	垂直力(KN)	垂直变形(mm)	围压(MPa)
18393	17.96	0.38111	8.996		9.40855	3.81874	182.475
18593	16.52	0.38102	8.979		8.65419	3.81784	182.13
18793	16.1	0.38297	8.979		8.43417	3.83737	182.13
18994	17.06	0.38433	8.978		8.93707	3.851	182.11
19194	17.06	0.38433	8.978		8.93707	3.851	182.11
19396	16.92	0.38508	8.974		8.86373	3.85852	182.028
19597	17.42	0.3871	8.977		9.12566	3.87876	182.089
19797	17.88	0.38674	8.979		9.36664	3.87515	182.13
19997	17.88	0.38674	8.979		9.36664	3.87515	182.13
20198	17.9	0.38873	8.976		9.37712	3.89509	182.069
20398	17.9	0.38873	8.976		9.37712	3.89509	182.069
20599	18.16	0.39174	8.978		9.51332	3.92525	182.11
20799	18.16	0.39174	8.978		9.51332	3.92525	182.11
20999	17.76	0.39418	8.977		9.30378	3.9497	182.089
21200	17.78	0.39378	8.978		9.31425	3.94569	182.11
21400	18.18	0.39594	8.976		9.5238	3.96733	182.069
21601	17.78	0.39588	8.977		9.31425	3.96673	182.089
21801	17.78	0.39588	8.977		9.31425	3.96673	182.089
22001	17.78	0.39588	8.977		9.31425	3.96673	182.089
22202	17.78	0.39588	8.977		9.31425	3.96673	182.089
22402	17.78	0.39588	8.977		9.31425	3.96673	182.089
22604	17.78	0.39588	8.977		9.31425	3.96673	182.089
22805	18	0.4017	8.978		9.4295	4.02505	182.11
23005	18.16	0.40374	8.976		9.51332	4.04549	182.069
23205	18.16	0.40374	8.976		9.51332	4.04549	182.069
23406	18.02	0.40549	8.977		9.43998	4.06303	182.089
23606	18.02	0.40549	8.977		9.43998	4.06303	182.089
23807	18.18	0.40754	8.975		9.5238	4.08357	182.049
24007	18.18	0.40754	8.975		9.5238	4.08357	182.049
24207	18.68	0.40936	8.977		9.78573	4.1018	182.089
24408	19.02	0.40924	8.977		9.96384	4.1006	182.089
24608	19.02	0.40924	8.977		9.96384	4.1006	182.089
24809	19.02	0.40924	8.977		9.96384	4.1006	182.089
25009	19.02	0.40924	8.977		9.96384	4.1006	182.089
25209	19.02	0.40924	8.977		9.96384	4.1006	182.089
25410	19.04	0.41524	8.98		9.97432	4.16072	182.15
25610	19.34	0.41533	8.977		10.1315	4.16162	182.089
25812	19.84	0.41766	8.978		10.3934	4.18497	182.11
26013	19.84	0.41766	8.978		10.3934	4.18497	182.11
26213	19.94	0.41862	8.978		10.4458	4.19459	182.11
26413	19.94	0.41862	8.978		10.4458	4.19459	182.11
26614	19.78	0.42008	8.975		10.362	4.20922	182.049
26814	20.18	0.42224	8.976		10.5715	4.23086	182.069
27015	20.06	0.42268	8.977		10.5087	4.23527	182.089
27215	20.14	0.42355	8.98		10.5506	4.24399	182.15
27415	20.22	0.42472	8.977		10.5925	4.25571	182.089
27616	20.26	0.42581	8.979		10.6134	4.26663	182.13
27816	20.4	0.42676	8.978		10.6868	4.27615	182.11
28017	20.4	0.42776	8.977		10.6868	4.28617	182.089
28217	20.4	0.42876	8.978		10.6868	4.29619	182.11
28417	20.54	0.42961	8.974		10.7601	4.30471	182.028
28618	20.62	0.43058	8.979		10.802	4.31443	182.13
28818	20.62	0.43128	8.977		10.802	4.32144	182.089
29020	20.68	0.43236	8.978		10.8335	4.33226	182.11
29221	20.94	0.43337	8.977		10.9697	4.34238	182.089
29421	20.88	0.43429	8.978		10.9382	4.3516	182.11
29621	20.98	0.43536	8.981		10.9906	4.36232	182.17
29822	21.02	0.43614	8.977		11.0116	4.37014	182.089
30022	21.16	0.43709	8.974		11.0849	4.37966	182.028
30223	21.2	0.43828	8.98		11.1059	4.39158	182.15
30423	21.22	0.43927	8.977		11.1163	4.4015	182.089
30623	21.26	0.44026	8.979		11.1373	4.41142	182.13
30824	21.38	0.44122	8.981		11.2002	4.42104	182.17
31024	21.4	0.44231	8.978		11.2106	4.43196	182.11
31225	21.48	0.44318	8.977		11.2525	4.44068	182.089
31425	21.6	0.44414	8.98		11.3154	4.4503	182.15
31625	21.68	0.44511	8.979		11.3573	4.46002	182.13
31826	21.72	0.4461	8.977		11.3783	4.46994	182.089
32026	21.7	0.44691	8.979		11.3678	4.47806	182.13
32228	21.9	0.44783	8.977		11.4726	4.48727	182.089
32429	21.98	0.44901	8.978		11.5145	4.4991	182.11
32629	21.98	0.45001	8.977		11.5145	4.50912	182.089
32829	21.96	0.45101	8.98		11.504	4.51914	182.15
33030	22.04	0.45199	8.98		11.5459	4.52896	182.15
33230	22.22	0.45272	8.978		11.6402	4.53627	182.11
33431	22.26	0.45381	8.977		11.6612	4.54719	182.089
33631	22.34	0.45478	8.975		11.7031	4.55691	182.049
33831	22.44	0.45565	8.977		11.7554	4.56563	182.089
34032	22.4	0.45676	8.978		11.7345	4.57675	182.11
34232	22.56	0.4576	8.977		11.8183	4.58517	182.089
34433	22.6	0.45859	8.977		11.8393	4.59509	182.089
34633	22.66	0.45967	8.977		11.8707	4.60591	182.089
34833	22.78	0.46053	8.977		11.9336	4.61453	182.089
35034	22.76	0.46173	8.979		11.9231	4.62655	182.13
35234	22.84	0.46271	8.977		11.965	4.63637	182.089
35436	23.1	0.46362	8.977		12.1012	4.64549	182.089
35637	23.02	0.46464	8.976		12.0593	4.65571	182.069
35837	23.14	0.4655	8.977		12.1221	4.66433	182.089
36037	23.28	0.46665	8.979		12.1955	4.67585	182.13
36238	23.26	0.46746	8.976		12.185	4.68397	182.069
36438	23.34	0.46833	8.975		12.2269	4.69269	182.049
36639	23.5	0.46938	8.977		12.3107	4.70321	182.089
36839	23.5	0.47038	8.978		12.3107	4.71323	182.11
37039	23.62	0.47143	8.981		12.3736	4.72375	182.17
37240	23.7	0.47241	8.977		12.4155	4.73357	182.089
37440	23.8	0.47327	8.979		12.4679	4.74218	182.13
37641	23.78	0.47428	8.981		12.4574	4.7523	182.17
37841	23.94	0.47532	8.979		12.5412	4.76273	182.13
38041	23.98	0.47641	8.977		12.5622	4.77365	182.089
38242	24.1	0.47717	8.975		12.6251	4.78126	182.049
38442	24.14	0.47825	8.976		12.646	4.79208	182.069
38643	24.22	0.47912	8.973		12.6879	4.8008	182.008
38843	24.24	0.48012	8.974		12.6984	4.81082	182.028
39043	24.3	0.481	8.979		12.7298	4.81964	182.13
39244	24.36	0.48197	8.978		12.7613	4.82936	182.11
39444	24.52	0.48292	8.977		12.8451	4.83888	182.089
39646	24.58	0.4839	8.975		12.8765	4.8487	182.049
39847	24.54	0.48491	8.978		12.8556	4.85882	182.11
40047	24.58	0.4859	8.98		12.8765	4.86874	182.15
40247	24.58	0.487	8.977		12.8765	4.87976	182.089
40448	24.72	0.48795	8.977		12.9499	4.88928	182.089
40648	24.76	0.48883	8.978		12.9708	4.8981	182.11
40849	24.78	0.48993	8.98		12.9813	4.90912	182.15
41049	24.88	0.49079	8.974		13.0337	4.91774	182.028
41249	24.84	0.49191	8.976		13.0127	4.92896	182.069
41450	25.2	0.49278	8.977		13.2013	4.93768	182.089
41650	25.22	0.49377	8.983		13.2118	4.9476	182.211
41851	25.28	0.49485	8.977		13.2432	4.95842	182.089
42051	25.28	0.49595	8.979		13.2432	4.96944	182.13
42251	25.34	0.49683	8.977		13.2746	4.97826	182.089
42452	25.4	0.49771	8.977		13.3061	4.98707	182.089
42652	25.56	0.49865	8.981		13.3899	4.99649	182.17
42854	25.54	0.49966	8.976		13.3794	5.00661	182.069
43055	25.56	0.50075	8.98		13.3899	5.01754	182.15
43255	25.72	0.5017	8.981		13.4737	5.02705	182.17
43455	25.82	0.50256	8.979		13.5261	5.03567	182.13
43656	25.88	0.50354	8.976		13.5575	5.04549	182.069
43856	25.92	0.50453	8.98		13.5785	5.05541	182.15
44057	25.98	0.50531	8.978		13.6099	5.06323	182.11
44257	26.1	0.50626	8.976		13.6728	5.07275	182.069
44457	26.18	0.50734	8.977		13.7147	5.08357	182.089
44658	26.18	0.50844	8.977		13.7147	5.09459	182.089
44858	26.36	0.50957	8.977		13.809	5.10591	182.089
45059	26.36	0.51057	8.974		13.809	5.11593	182.028
45259	26.44	0.51135	8.977		13.8509	5.12375	182.089
45459	26.56	0.5125	8.978		13.9138	5.13527	182.11
45660	26.62	0.51348	8.983		13.9452	5.14509	182.211
45860	26.68	0.51446	8.977		13.9766	5.15491	182.089
46062	26.72	0.51555	8.977		13.9976	5.16583	182.089
46263	26.82	0.51631	8.977		14.05	5.17345	182.089
46463	26.88	0.51729	8.978		14.0814	5.18327	182.11
46663	26.96	0.51816	8.979		14.1233	5.19198	182.13
46864	27.06	0.51923	8.978		14.1757	5.20271	182.11
47064	27.1	0.52031	8.981		14.1966	5.21353	182.17
47265	27.16	0.52129	8.977		14.2281	5.22335	182.089
47465	27.24	0.52227	8.974		14.27	5.23317	182.028
47665	27.28	0.52325	8.978		14.2909	5.24299	182.11
47866	27.34	0.52423	8.979		14.3224	5.25281	182.13
48066	27.42	0.525	8.98		14.3643	5.26052	182.15
48267	27.56	0.52615	8.981		14.4376	5.27204	182.17
48467	27.68	0.52711	8.977		14.5005	5.28166	182.089
48667	27.78	0.52788	8.979		14.5529	5.28938	182.13
48868	27.86	0.52885	8.978		14.5948	5.2991	182.11
49068	27.9	0.52994	8.977		14.6157	5.31002	182.089
49270	27.94	0.53082	8.978		14.6367	5.31884	182.11
49471	28	0.5319	8.976		14.6681	5.32966	182.069
49671	28.1	0.53286	8.979		14.7205	5.33928	182.13
49871	28.22	0.53382	8.976		14.7834	5.3489	182.069
50072	28.14	0.53475	8.975		14.7415	5.35822	182.049
50272	28.22	0.53572	8.977		14.7834	5.36794	182.089
50473	28.38	0.53667	8.977		14.8672	5.37745	182.089
50673	28.4	0.53776	8.977		14.8777	5.38838	182.089
50873	28.48	0.53873	8.977		14.9196	5.3981	182.089
51074	28.52	0.53962	8.977		14.9405	5.40701	182.089
51274	28.6	0.54069	8.977		14.9824	5.41774	182.089
51475	28.64	0.54168	8.977		15.0034	5.42766	182.089
51675	28.78	0.54263	8.979		15.0767	5.43717	182.13
51875	28.86	0.5436	8.974		15.1186	5.44689	182.028
52076	28.94	0.54457	8.977		15.1605	5.45661	182.089
52276	29.06	0.54553	8.979		15.2234	5.46623	182.13
52478	29.08	0.54652	8.979		15.2339	5.47615	182.13
52679	29.14	0.5475	8.977		15.2653	5.48597	182.089
52879	29.28	0.54845	8.976		15.3387	5.49549	182.069
53079	29.42	0.5495	8.98		15.412	5.50601	182.15
53280	29.5	0.55048	8.981		15.4539	5.51583	182.17
53480	29.52	0.55137	8.977		15.4644	5.52475	182.089
53681	29.56	0.55245	8.977		15.4853	5.53557	182.089
53881	29.68	0.55341	8.977		15.5482	5.54519	182.089
54081	29.68	0.55451	8.978		15.5482	5.55621	182.11
54282	29.8	0.55537	8.977		15.6111	5.56483	182.089
54482	29.88	0.55644	8.982		15.653	5.57555	182.191
54683	29.88	0.55724	8.977		15.653	5.58357	182.089
54883	30.08	0.55827	8.977		15.7577	5.59389	182.089
55083	30.06	0.55918	8.977		15.7473	5.60301	182.089
55284	30.22	0.56012	8.979		15.8311	5.61242	182.13
55484	30.2	0.56113	8.979		15.8206	5.62255	182.13
55686	30.26	0.56211	8.977		15.852	5.63236	182.089
55887	30.4	0.56306	8.979		15.9254	5.64188	182.13
56087	30.56	0.5641	8.979		16.0092	5.6523	182.13
56287	30.6	0.56519	8.976		16.0302	5.66323	182.069
56488	30.64	0.56618	8.977		16.0511	5.67315	182.089
56688	30.68	0.56716	8.974		16.0721	5.68297	182.028
56889	30.74	0.56804	8.977		16.1035	5.69178	182.089
57089	30.88	0.56899	8.977		16.1768	5.7013	182.089
57289	30.94	0.57007	8.981		16.2083	5.71212	182.17
57490	30.98	0.57096	8.977		16.2292	5.72104	182.089
57690	31.1	0.57182	8.977		16.2921	5.72966	182.089
57891	31.2	0.57278	8.978		16.3445	5.73928	182.11
58091	31.28	0.57365	8.977		16.3864	5.748	182.089
58291	31.26	0.57466	8.978		16.3759	5.75812	182.11
58492	31.4	0.57561	8.978		16.4492	5.76764	182.11
58692	31.5	0.57648	8.979		16.5016	5.77635	182.13
58893	31.62	0.57763	8.975		16.5645	5.78788	182.049
59093	31.62	0.57873	8.976		16.5645	5.7989	182.069
59293	31.74	0.57969	8.974		16.6274	5.80852	182.028
59494	31.8	0.58057	8.978		16.6588	5.81733	182.11
59694	31.84	0.58176	8.976		16.6797	5.82926	182.069
59896	31.88	0.58264	8.979		16.7007	5.83808	182.13
60097	32.02	0.58369	8.979		16.774	5.8486	182.13
60297	32.08	0.58467	8.979		16.8055	5.85842	182.13
60497	32.1	0.58557	8.981		16.8159	5.86743	182.17
60698	32.28	0.5866	8.975		16.9102	5.87776	182.049
60898	32.24	0.58742	8.974		16.8893	5.88597	182.028
61099	32.3	0.5884	8.977		16.9207	5.89579	182.089
61299	32.44	0.58935	8.979		16.9941	5.90531	182.13
61499	32.4	0.59026	8.977		16.9731	5.91443	182.089
61700	32.54	0.59121	8.977		17.0464	5.92395	182.089
61900	32.62	0.59218	8.977		17.0884	5.93367	182.089
62101	32.78	0.59323	8.98		17.1722	5.94419	182.15
62301	32.78	0.59423	8.976		17.1722	5.95421	182.069
62501	32.84	0.59521	8.978		17.2036	5.96403	182.11
62702	33.12	0.59601	8.976		17.3503	5.97204	182.069
62902	33.08	0.59702	8.974		17.3293	5.98216	182.028
63104	33.18	0.59809	8.974		17.3817	5.99289	182.028
63305	33.22	0.59917	8.977		17.4027	6.00371	182.089
63505	33.36	0.60002	8.978		17.476	6.01222	182.11
63705	33.42	0.601	8.979		17.5074	6.02204	182.13
63906	33.44	0.6019	8.977		17.5179	6.03106	182.089
64106	33.54	0.60286	8.976		17.5703	6.04068	182.069
64307	33.62	0.60383	8.977		17.6122	6.0504	182.089
64507	33.66	0.60482	8.979		17.6332	6.06032	182.13
64707	33.74	0.60579	8.976		17.6751	6.07004	182.069
64908	33.84	0.60686	8.974		17.7275	6.08076	182.028
65108	33.98	0.60771	8.978		17.8008	6.08928	182.11
65309	34.04	0.60879	8.977		17.8322	6.1001	182.089
65509	34.04	0.60979	8.978		17.8322	6.11012	182.11
65709	34.1	0.61067	8.977		17.8637	6.11894	182.089
65910	34.2	0.61173	8.979		17.9161	6.12956	182.13
66110	34.3	0.6126	8.979		17.9684	6.13828	182.13
66312	34.4	0.61356	8.977		18.0208	6.1479	182.089
66513	34.4	0.61456	8.974		18.0208	6.15792	182.028
66713	34.52	0.61552	8.977		18.0837	6.16754	182.089
66913	34.66	0.61647	8.974		18.157	6.17705	182.028
67114	34.76	0.61733	8.977		18.2094	6.18567	182.089
67314	34.78	0.61853	8.977		18.2199	6.1977	182.089
67515	34.9	0.61949	8.979		18.2828	6.20731	182.13
67715	34.92	0.62038	8.976		18.2932	6.21623	182.069
67915	35.06	0.62133	8.979		18.3666	6.22575	182.13
68116	35.22	0.62237	8.977		18.4504	6.23617	182.089
68316	35.14	0.6233	8.977		18.4085	6.24549	182.089
68517	35.34	0.62423	8.977		18.5133	6.25481	182.089
68717	35.34	0.62523	8.98		18.5133	6.26483	182.15
68917	35.38	0.62622	8.98		18.5342	6.27475	182.15
69118	35.48	0.62708	8.977		18.5866	6.28337	182.089
69318	35.6	0.62794	8.976		18.6495	6.29198	182.069
69520	35.72	0.6291	8.977		18.7123	6.30361	182.089
69721	35.72	0.63	8.978		18.7123	6.31263	182.11
69921	35.88	0.63094	8.98		18.7961	6.32204	182.15
70121	35.9	0.63204	8.98		18.8066	6.33307	182.15
70322	36	0.6328	8.979		18.859	6.34068	182.13
70522	36.06	0.63388	8.979		18.8904	6.3515	182.13
70723	36.2	0.63483	8.977		18.9638	6.36102	182.089
70923	36.34	0.63578	8.978		19.0371	6.37054	182.11
71123	36.2	0.63673	8.978		18.9638	6.38006	182.11
71324	36.38	0.63777	8.981		19.0581	6.39048	182.17
71524	36.56	0.6387	8.976		19.1524	6.3998	182.069
71725	36.48	0.63983	8.977		19.1105	6.41112	182.089
71925	36.58	0.6408	8.977		19.1628	6.42084	182.089
72125	36.76	0.64173	8.977		19.2571	6.43016	182.089
72326	36.84	0.64281	8.975		19.299	6.44098	182.049
72526	36.86	0.6439	8.976		19.3095	6.4519	182.069
72728	36.98	0.64486	8.978		19.3724	6.46152	182.11
72929	37.06	0.64573	8.978		19.4143	6.47024	182.11
73129	37.04	0.64684	8.981		19.4038	6.48136	182.17
73329	37.26	0.64766	8.979		19.5191	6.48958	182.13
73530	37.32	0.64864	8.977		19.5505	6.4994	182.089
73730	37.38	0.64972	8.98		19.5819	6.51022	182.15
73931	37.44	0.6507	8.976		19.6134	6.52004	182.069
74131	37.44	0.6519	8.977		19.6134	6.53206	182.089
74331	37.58	0.65275	8.976		19.6867	6.54058	182.069
74532	37.6	0.65364	8.979		19.6972	6.5495	182.13
74732	37.7	0.65471	8.979		19.7496	6.56022	182.13
74933	37.8	0.65557	8.977		19.802	6.56884	182.089
75133	37.88	0.65654	8.977		19.8439	6.57856	182.089
75333	37.92	0.65743	8.975		19.8648	6.58747	182.049
75534	38.06	0.65838	8.978		19.9382	6.59699	182.11
75734	38.12	0.65926	8.975		19.9696	6.60581	182.049
75936	38.22	0.66032	8.976		20.022	6.61643	182.069
76137	38.22	0.66122	8.978		20.022	6.62545	182.11
76337	38.36	0.66217	8.981		20.0953	6.63497	182.17
76537	38.42	0.66325	8.978		20.1267	6.64579	182.11
76738	38.5	0.66413	8.977		20.1687	6.65461	182.089
76938	38.56	0.6651	8.977		20.2001	6.66433	182.089
77139	38.68	0.66606	8.978		20.263	6.67395	182.11
77339	38.78	0.66723	8.978		20.3153	6.68567	182.11
77539	38.8	0.66812	8.979		20.3258	6.69459	182.13
77740	38.96	0.66916	8.979		20.4096	6.70501	182.13
77940	39.02	0.67024	8.977		20.4411	6.71583	182.089
78141	39.08	0.67132	8.977		20.4725	6.72665	182.089
78341	39.12	0.67231	8.977		20.4935	6.73657	182.089
78541	39.3	0.67314	8.975		20.5877	6.74489	182.049
78742	39.32	0.67414	8.979		20.5982	6.75491	182.13
78942	39.36	0.67512	8.98		20.6192	6.76473	182.15
79143	39.5	0.67598	8.977		20.6925	6.77335	182.089
79343	39.54	0.67696	8.976		20.7135	6.78317	182.069
79543	39.64	0.67783	8.976		20.7659	6.79188	182.069
79744	39.82	0.67896	8.976		20.8602	6.80321	182.069
79944	39.76	0.67988	8.977		20.8287	6.81242	182.089
80146	39.88	0.68084	8.976		20.8916	6.82204	182.069
80347	39.9	0.68183	8.977		20.9021	6.83196	182.089
80547	39.96	0.68271	8.978		20.9335	6.84078	182.11
80747	40.1	0.68367	8.978		21.0068	6.8504	182.11
80948	40.12	0.68466	8.978		21.0173	6.86032	182.11
81148	40.18	0.68564	8.978		21.0487	6.87014	182.11
81349	40.28	0.6865	8.978		21.1011	6.87876	182.11
81549	40.42	0.68755	8.975		21.1745	6.88928	182.049
81749	40.48	0.68853	8.977		21.2059	6.8991	182.089
81950	40.5	0.68953	8.978		21.2164	6.90912	182.11
82150	40.54	0.69061	8.977		21.2373	6.91994	182.089
82351	40.72	0.69145	8.978		21.3316	6.92836	182.11
82551	40.78	0.69243	8.976		21.3631	6.93818	182.069
82751	40.88	0.69329	8.978		21.4154	6.94679	182.11
82952	41.02	0.69434	8.978		21.4888	6.95731	182.11
83152	41.04	0.69524	8.978		21.4993	6.96633	182.11
83354	41.08	0.69632	8.977		21.5202	6.97715	182.089
83555	41.32	0.69704	8.973		21.6459	6.98437	182.008
83755	41.3	0.69835	8.979		21.6355	6.99749	182.13
83955	41.48	0.69918	8.977		21.7298	7.00581	182.089
84156	41.56	0.70025	8.978		21.7717	7.01653	182.11
84356	41.52	0.70127	8.978		21.7507	7.02675	182.11
84557	41.6	0.70224	8.977		21.7926	7.03647	182.089
84757	41.7	0.70311	8.979		21.845	7.04519	182.13
84957	41.66	0.70412	8.977		21.8241	7.05531	182.089
85158	41.8	0.70507	8.977		21.8974	7.06483	182.089
85358	41.92	0.70623	8.977		21.9603	7.07645	182.089
85559	41.94	0.70722	8.977		21.9707	7.08637	182.089
85759	42.12	0.70816	8.977		22.065	7.09579	182.089
85959	42.12	0.70916	8.976		22.065	7.10581	182.069
86160	42.18	0.71024	8.976		22.0965	7.11663	182.069
86360	42.32	0.71119	8.979		22.1698	7.12615	182.13
86562	42.42	0.71225	8.977		22.2222	7.13677	182.089
86763	42.4	0.71316	8.979		22.2117	7.14589	182.13
86963	42.48	0.71413	8.979		22.2536	7.15561	182.13
87163	42.64	0.71498	8.979		22.3374	7.16413	182.13
87364	42.74	0.71594	8.979		22.3898	7.17375	182.13
87564	42.82	0.71691	8.979		22.4317	7.18347	182.13
87765	42.9	0.71789	8.976		22.4736	7.19329	182.069
87965	43.02	0.71884	8.978		22.5365	7.20281	182.11
88165	43.1	0.71982	8.979		22.5784	7.21263	182.13
88366	43.02	0.72094	8.977		22.5365	7.22385	182.089
88566	43.2	0.72188	8.976		22.6308	7.23327	182.069
88767	43.32	0.72294	8.98		22.6937	7.24389	182.15
88967	43.3	0.72385	8.979		22.6832	7.25301	182.13
89167	43.48	0.72468	8.974		22.7775	7.26132	182.028
89368	43.56	0.72565	8.976		22.8194	7.27104	182.069
89568	43.62	0.72663	8.978		22.8508	7.28086	182.11
89770	43.62	0.72763	8.975		22.8508	7.29088	182.049
89971	43.86	0.72855	8.976		22.9766	7.3001	182.069
90171	43.88	0.72964	8.977		22.987	7.31102	182.089
90371	43.94	0.73052	8.977		23.0185	7.31984	182.089
90572	44	0.7314	8.977		23.0499	7.32866	182.089
90772	44.08	0.73237	8.978		23.0918	7.33838	182.11
90973	44.26	0.73331	8.976		23.1861	7.3478	182.069
91173	44.24	0.73432	8.976		23.1756	7.35792	182.069
91373	44.36	0.73527	8.982		23.2385	7.36743	182.191
91574	44.44	0.73615	8.975		23.2804	7.37625	182.049
91774	44.46	0.73724	8.978		23.2909	7.38717	182.11
91975	44.52	0.73822	8.977		23.3223	7.39699	182.089
92175	44.58	0.7391	8.979		23.3537	7.40581	182.13
92375	44.68	0.74016	8.979		23.4061	7.41643	182.13
92576	44.8	0.74092	8.977		23.469	7.42405	182.089
92776	44.84	0.74201	8.977		23.4899	7.43497	182.089
92978	44.98	0.74286	8.979		23.5633	7.44349	182.13
93179	44.98	0.74396	8.975		23.5633	7.45451	182.049
93379	45.08	0.74482	8.979		23.6157	7.46313	182.13
93579	45.22	0.74587	8.977		23.689	7.47365	182.089
93780	45.38	0.74692	8.981		23.7728	7.48417	182.17
93980	45.42	0.7479	8.977		23.7938	7.49399	182.089
94181	45.46	0.74889	8.977		23.8147	7.50391	182.089
94381	45.54	0.74976	8.976		23.8566	7.51263	182.069
94581	45.66	0.75062	8.977		23.9195	7.52124	182.089
94782	45.78	0.75178	8.977		23.9824	7.53287	182.089
94982	45.82	0.75276	8.976		24.0033	7.54269	182.069
95183	45.86	0.75375	8.978		24.0243	7.55261	182.11
95383	46	0.7549	8.979		24.0976	7.56413	182.13
95583	46.1	0.75577	8.977		24.15	7.57285	182.089
95784	46.1	0.75677	8.975		24.15	7.58287	182.049
95984	46.26	0.75761	8.977		24.2338	7.59128	182.089
96186	46.2	0.75873	8.979		24.2024	7.60251	182.13
96387	46.3	0.75969	8.978		24.2548	7.61212	182.11
96587	46.42	0.76065	8.978		24.3176	7.62174	182.11
96787	46.5	0.76173	8.978		24.3595	7.63257	182.11
96988	46.6	0.76249	8.979		24.4119	7.64018	182.13
97188	46.8	0.76342	8.977		24.5167	7.6495	182.089
97389	46.74	0.76454	8.978		24.4853	7.66072	182.11
97589	46.9	0.76559	8.977		24.5691	7.67124	182.089
97789	46.98	0.76646	8.976		24.611	7.67996	182.069
97990	46.96	0.76736	8.975		24.6005	7.68898	182.049
98190	47.12	0.76831	8.978		24.6843	7.6985	182.11
98391	47.2	0.76928	8.977		24.7263	7.70822	182.089
98591	47.32	0.77014	8.978		24.7891	7.71683	182.11
98791	47.48	0.77118	8.977		24.8729	7.72725	182.089
98992	47.52	0.77217	8.979		24.8939	7.73717	182.13
99192	47.52	0.77317	8.976		24.8939	7.74719	182.069
99393	47.64	0.77403	8.975		24.9568	7.75581	182.049
99593	47.72	0.7751	8.979		24.9987	7.76653	182.13
99793	47.76	0.77608	8.978		25.0196	7.77635	182.11
99994	47.82	0.77706	8.977		25.051	7.78617	182.089
100194	48.02	0.77819	8.977		25.1558	7.79749	182.089
100396	48	0.7791	8.977		25.1453	7.80661	182.089
100597	48.14	0.77995	8.978		25.2187	7.81513	182.11
100797	48.18	0.78094	8.978		25.2396	7.82505	182.11
100997	48.32	0.78209	8.975		25.313	7.83657	182.049
101198	48.34	0.78298	8.977		25.3235	7.84549	182.089
101398	48.42	0.78385	8.977		25.3654	7.85421	182.089
101599	48.52	0.78492	8.977		25.4177	7.86493	182.089
101799	48.62	0.78588	8.976		25.4701	7.87455	182.069
101999	48.66	0.78677	8.977		25.4911	7.88347	182.089
102200	48.76	0.78783	8.977		25.5435	7.89409	182.089
102400	48.8	0.78872	8.977		25.5644	7.90301	182.089
102601	48.96	0.78976	8.977		25.6482	7.91343	182.089
102801	48.92	0.79068	8.976		25.6273	7.92265	182.069
103001	49.1	0.79162	8.979		25.7216	7.93206	182.13
103202	49.06	0.79263	8.979		25.7006	7.94218	182.13
103402	49.28	0.79365	8.977		25.8159	7.9524	182.089
103604	49.28	0.79465	8.978		25.8159	7.96242	182.11
103805	49.36	0.79562	8.978		25.8578	7.97214	182.11
104005	49.32	0.79644	8.979		25.8368	7.98036	182.13
104205	49.5	0.79738	8.974		25.9311	7.98978	182.028
104406	49.62	0.79853	8.976		25.994	8.0013	182.069
104606	49.7	0.7995	8.977		26.0359	8.01102	182.089
104807	49.72	0.8004	8.976		26.0464	8.02004	182.069
105007	49.92	0.80143	8.975		26.1512	8.03036	182.049
105207	49.92	0.80233	8.978		26.1512	8.03938	182.11
105408	50.04	0.80319	8.979		26.214	8.048	182.13
105608	50.02	0.80429	8.976		26.2035	8.05902	182.069
105809	50.18	0.80524	8.978		26.2874	8.06854	182.11
106009	50.4	0.80606	8.979		26.4026	8.07675	182.13
106209	50.3	0.80709	8.974		26.3502	8.08707	182.028
106410	50.34	0.80828	8.977		26.3712	8.099	182.089
106610	50.48	0.80913	8.979		26.4445	8.10752	182.13
106812	50.64	0.80998	8.979		26.5283	8.11603	182.13
107013	50.64	0.81118	8.977		26.5283	8.12806	182.089
107213	50.78	0.81203	8.977		26.6017	8.13657	182.089
107413	50.8	0.81332	8.975		26.6122	8.1495	182.049
107614	50.88	0.81429	8.977		26.6541	8.15922	182.089
107814	51.02	0.81534	8.977		26.7274	8.16974	182.089
108015	51.06	0.81623	8.976		26.7484	8.17866	182.069
108215	51.16	0.81719	8.977		26.8007	8.18828	182.089
108415	51.12	0.81801	8.975		26.7798	8.19649	182.049
108616	51.26	0.81916	8.979		26.8531	8.20802	182.13
108816	51.34	0.82013	8.977		26.895	8.21774	182.089
109017	51.42	0.821	8.978		26.9369	8.22645	182.11
109217	51.56	0.82205	8.978		27.0103	8.23697	182.11
109417	51.66	0.82292	8.979		27.0627	8.24569	182.13
109618	51.68	0.82401	8.977		27.0731	8.25661	182.089
109818	51.74	0.82489	8.979		27.1046	8.26543	182.13
110020	51.76	0.82588	8.976		27.1151	8.27535	182.069
110221	52.04	0.82669	8.978		27.2617	8.28347	182.11
110421	52.06	0.82778	8.979		27.2722	8.29439	182.13
110621	52.1	0.82857	8.976		27.2932	8.3023	182.069
110822	52.12	0.82966	8.977		27.3036	8.31323	182.089
111022	52.24	0.83052	8.977		27.3665	8.32184	182.089
111223	52.3	0.83149	8.978		27.3979	8.33156	182.11
111423	52.34	0.83228	8.975		27.4189	8.33948	182.049
111623	52.5	0.83333	8.979		27.5027	8.35	182.13
111824	52.58	0.8343	8.979		27.5446	8.35972	182.13
112024	52.62	0.83528	8.979		27.5656	8.36954	182.13
112225	52.56	0.8363	8.978		27.5341	8.37976	182.11
112425	52.76	0.83723	8.975		27.6389	8.38908	182.049
112625	52.82	0.83841	8.977		27.6704	8.4009	182.089
112826	52.82	0.83931	8.977		27.6704	8.40992	182.089
113026	53.06	0.84023	8.979		27.7961	8.41914	182.13
113228	53.12	0.84121	8.979		27.8275	8.42896	182.13
113429	53.1	0.84211	8.976		27.817	8.43798	182.069
113629	53.3	0.84304	8.98		27.9218	8.44729	182.15
113829	53.34	0.84403	8.974		27.9428	8.45721	182.028
114030	53.42	0.845	8.978		27.9847	8.46693	182.11
114230	53.48	0.84598	8.977		28.0161	8.47675	182.089
114431	53.58	0.84695	8.978		28.0685	8.48647	182.11
114631	53.56	0.84795	8.978		28.058	8.49649	182.11
114831	53.76	0.84888	8.975		28.1628	8.50581	182.049
115032	53.88	0.84984	8.977		28.2256	8.51543	182.089
115232	53.88	0.85124	8.98		28.2256	8.52946	182.15
115433	54.1	0.85227	8.975		28.3409	8.53978	182.049
115633	54.24	0.85332	8.977		28.4142	8.5503	182.089
115833	54.24	0.85432	8.977		28.4142	8.56032	182.089
116034	54.24	0.85532	8.979		28.4142	8.57034	182.13
116234	54.38	0.85617	8.976		28.4876	8.57886	182.069
116436	54.42	0.85725	8.976		28.5085	8.58968	182.069
116637	54.44	0.85815	8.977		28.519	8.5987	182.089
116837	54.56	0.8592	8.979		28.5819	8.60922	182.13
117037	54.66	0.86017	8.975		28.6343	8.61894	182.049
117238	54.68	0.86096	8.978		28.6447	8.62685	182.11
117438	54.72	0.86205	8.979		28.6657	8.63778	182.13
117639	54.84	0.86281	8.979		28.7286	8.64539	182.13
117839	55	0.86375	8.981		28.8124	8.65481	182.17
118039	54.98	0.86466	8.975		28.8019	8.66393	182.049
118240	55.1	0.86571	8.981		28.8648	8.67445	182.17
118440	55.16	0.86669	8.979		28.8962	8.68427	182.13
118641	55.12	0.86771	8.977		28.8752	8.69449	182.089
118841	55.24	0.86867	8.977		28.9381	8.70411	182.089
119041	55.34	0.86953	8.979		28.9905	8.71273	182.13
119242	55.46	0.87049	8.98		29.0533	8.72234	182.15
119442	55.56	0.87155	8.979		29.1057	8.73297	182.13
119643	55.7	0.87251	8.976		29.1791	8.74259	182.069
119843	55.74	0.87339	8.977		29.2	8.7514	182.089
120043	55.84	0.87426	8.977		29.2524	8.76012	182.089
120244	55.94	0.87532	8.978		29.3048	8.77074	182.11
120444	55.98	0.87621	8.977		29.3258	8.77966	182.089
120646	56.02	0.87729	8.977		29.3467	8.79048	182.089
120847	56.08	0.87817	8.977		29.3781	8.7993	182.089
121047	56.18	0.87924	8.979		29.4305	8.81002	182.13
121247	56.34	0.88008	8.978		29.5143	8.81844	182.11
121448	56.42	0.88095	8.977		29.5563	8.82715	182.089
121648	56.42	0.88205	8.976		29.5563	8.83818	182.069
121849	56.66	0.88327	8.979		29.682	8.8504	182.13
122049	56.68	0.88416	8.98		29.6925	8.85932	182.15
122249	56.76	0.88533	8.979		29.7344	8.87104	182.13
122450	56.8	0.88632	8.976		29.7553	8.88096	182.069
122650	56.8	0.88732	8.977		29.7553	8.89098	182.089
122851	57.06	0.88813	8.978		29.8915	8.8991	182.11
123051	57.06	0.88913	8.977		29.8915	8.90912	182.089
123251	57.08	0.89012	8.976		29.902	8.91904	182.069
123452	57.24	0.89097	8.979		29.9858	8.92756	182.13
123652	57.32	0.89194	8.979		30.0277	8.93727	182.13
123854	57.42	0.893	8.978		30.0801	8.9479	182.11
124055	57.5	0.89388	8.977		30.122	8.95671	182.089
124255	57.56	0.89495	8.976		30.1535	8.96743	182.069
124455	57.68	0.89581	8.974		30.2163	8.97605	182.028
124656	57.68	0.89681	8.978		30.2163	8.98607	182.11
124856	57.76	0.89778	8.978		30.2582	8.99579	182.11
125057	57.88	0.89864	8.977		30.3211	9.00441	182.089
125257	58	0.8997	8.979		30.384	9.01503	182.13
125457	58.02	0.90069	8.977		30.3944	9.02495	182.089
125658	57.94	0.90172	8.978		30.3525	9.03527	182.11
125858	58.06	0.90258	8.979		30.4154	9.04389	182.13
126059	58.16	0.90344	8.977		30.4678	9.05251	182.089
126259	58.32	0.90439	8.977		30.5516	9.06202	182.089
126459	58.26	0.90541	8.978		30.5202	9.07224	182.11
126660	58.44	0.90625	8.979		30.6145	9.08066	182.13
126860	58.48	0.90733	8.975		30.6354	9.09148	182.049
127062	58.52	0.90812	8.978		30.6564	9.0994	182.11
127263	58.66	0.90907	8.975		30.7297	9.10892	182.049
127463	58.78	0.91003	8.979		30.7926	9.11854	182.13
127663	58.92	0.91118	8.975		30.8659	9.13006	182.049
127864	59	0.91225	8.975		30.9078	9.14078	182.049
128064	59.06	0.91333	8.978		30.9392	9.1516	182.11
128265	59.14	0.9143	8.979		30.9812	9.16132	182.13
128465	59.18	0.91549	8.976		31.0021	9.17325	182.069
128665	59.32	0.91624	8.977		31.0754	9.18076	182.089
128866	59.34	0.91723	8.975		31.0859	9.19068	182.049
129066	59.56	0.91825	8.977		31.2012	9.2009	182.089
129267	59.56	0.91915	8.977		31.2012	9.20992	182.089
129467	59.58	0.92005	8.978		31.2117	9.21894	182.11
129667	59.7	0.92111	8.979		31.2745	9.22956	182.13
129868	59.82	0.92226	8.978		31.3374	9.24108	182.11
130068	59.94	0.92312	8.978		31.4002	9.2497	182.11
130270	59.92	0.92413	8.981		31.3898	9.25982	182.17
130471	60.02	0.92499	8.977		31.4422	9.26844	182.089
130671	60.06	0.92608	8.977		31.4631	9.27936	182.089
130871	60.16	0.92704	8.975		31.5155	9.28898	182.049
131072	60.22	0.92792	8.977		31.5469	9.2978	182.089
131272	60.3	0.9288	8.977		31.5888	9.30661	182.089
131473	60.5	0.92972	8.976		31.6936	9.31583	182.069
131673	60.5	0.93093	8.977		31.6936	9.32796	182.089
131873	60.64	0.93188	8.979		31.7669	9.33747	182.13
132074	60.7	0.93296	8.979		31.7984	9.3483	182.13
132274	60.78	0.93403	8.977		31.8403	9.35902	182.089
132475	60.78	0.93503	8.979		31.8403	9.36904	182.13
132675	60.78	0.93603	8.974		31.8403	9.37906	182.028
132875	60.96	0.93676	8.977		31.9346	9.38637	182.089
133076	61.08	0.93792	8.979		31.9974	9.398	182.13
133276	61.16	0.93879	8.98		32.0394	9.40671	182.15
133478	61.16	0.93979	8.978		32.0394	9.41673	182.11
133679	61.22	0.94067	8.978		32.0708	9.42555	182.11
133879	61.38	0.94172	8.976		32.1546	9.43607	182.069
134079	61.42	0.9425	8.977		32.1756	9.44389	182.089
134280	61.56	0.94355	8.977		32.2489	9.45441	182.089
134480	61.6	0.94434	8.977		32.2699	9.46232	182.089
134681	61.72	0.9453	8.975		32.3327	9.47194	182.049
134881	61.76	0.94648	8.974		32.3537	9.48377	182.028
135081	61.96	0.94751	8.977		32.4584	9.49409	182.089
135282	61.9	0.94854	8.979		32.427	9.50441	182.13
135482	62.08	0.94957	8.977		32.5213	9.51473	182.089
135683	62.12	0.95036	8.977		32.5423	9.52265	182.089
135883	62.18	0.95134	8.978		32.5737	9.53246	182.11
136083	62.18	0.95234	8.977		32.5737	9.54248	182.089
136284	62.22	0.95332	8.977		32.5946	9.5523	182.089
136484	62.3	0.9543	8.981		32.6366	9.56212	182.17
136686	62.52	0.95512	8.978		32.7518	9.57034	182.11
136887	62.58	0.9562	8.977		32.7832	9.58116	182.089
137087	62.64	0.95708	8.975		32.8147	9.58998	182.049
137287	62.74	0.95804	8.975		32.8671	9.5996	182.049
137488	62.78	0.95903	8.978		32.888	9.60952	182.11
137688	62.88	0.95999	8.977		32.9404	9.61914	182.089
137889	62.92	0.96088	8.979		32.9614	9.62806	182.13
138089	63.02	0.96184	8.98		33.0137	9.63768	182.15
138289	62.96	0.96276	8.978		32.9823	9.64689	182.11
138490	63.12	0.96381	8.977		33.0661	9.65741	182.089
138690	63.26	0.96466	8.977		33.1395	9.66593	182.089
138891	63.3	0.96575	8.978		33.1604	9.67685	182.11
139091	63.38	0.96652	8.977		33.2023	9.68457	182.089
139291	63.42	0.9674	8.976		33.2233	9.69339	182.069
139492	63.5	0.96847	8.978		33.2652	9.70411	182.11
139692	63.58	0.96955	8.978		33.3071	9.71493	182.11
139893	63.7	0.97061	8.977		33.37	9.72555	182.089
140093	63.7	0.97161	8.975		33.37	9.73557	182.049
140293	63.82	0.97256	8.977		33.4328	9.74509	182.089
140494	63.82	0.97356	8.977		33.4328	9.75511	182.089
140694	63.98	0.97451	8.977		33.5166	9.76463	182.089
140896	63.98	0.97551	8.979		33.5166	9.77465	182.13
141097	64.04	0.97649	8.977		33.5481	9.78447	182.089
141297	64.16	0.97744	8.98		33.6109	9.79399	182.15
141497	64.26	0.97861	8.976		33.6633	9.80571	182.069
141698	64.44	0.97945	8.978		33.7576	9.81413	182.11
141898	64.56	0.9805	8.975		33.8205	9.82465	182.049
142099	64.54	0.98151	8.978		33.81	9.83477	182.11
142299	64.64	0.98238	8.977		33.8624	9.84349	182.089
142499	64.72	0.98335	8.978		33.9043	9.85321	182.11
142700	64.78	0.98433	8.976		33.9357	9.86303	182.069
142900	64.78	0.98533	8.977		33.9357	9.87305	182.089
143101	64.92	0.98628	8.977		34.0091	9.88257	182.089
143301	65.04	0.98714	8.976		34.0719	9.89118	182.069
143501	65.02	0.98834	8.977		34.0615	9.90321	182.089
143702	65.1	0.98902	8.977		34.1034	9.91002	182.089
143902	65.2	0.99008	8.976		34.1558	9.92064	182.069
144104	65.28	0.99085	8.979		34.1977	9.92836	182.13
144305	65.3	0.99204	8.98		34.2081	9.94028	182.15
144505	65.4	0.99301	8.978		34.2605	9.95	182.11
144705	65.42	0.9939	8.979		34.271	9.95892	182.13
144906	65.54	0.99486	8.975		34.3339	9.96854	182.049
145106	65.68	0.99601	8.979		34.4072	9.98006	182.13
145307	65.84	0.99696	8.976		34.491	9.98958	182.069
145507	65.92	0.99803	8.979		34.5329	10.0003	182.13
145707	65.94	0.99902	8.978		34.5434	10.0102	182.11
145908	65.98	1.00001	8.977		34.5644	10.0201	182.089
146108	66.08	1.00107	8.977		34.6168	10.0308	182.089
146309	66.12	1.00206	8.979		34.6377	10.0407	182.13
146509	66.24	1.00322	8.98		34.7006	10.0523	182.15
146709	66.22	1.00402	8.977		34.6901	10.0603	182.089
146910	66.38	1.00497	8.977		34.7739	10.0698	182.089
147110	66.38	1.00587	8.978		34.7739	10.0789	182.11
147312	66.44	1.00675	8.978		34.8053	10.0877	182.11
147513	66.52	1.00772	8.979		34.8473	10.0974	182.13
147713	66.58	1.0087	8.975		34.8787	10.1072	182.049
147913	66.72	1.00965	8.976		34.952	10.1167	182.069
148114	66.8	1.01062	8.979		34.9939	10.1265	182.13
148314	66.88	1.01159	8.976		35.0358	10.1362	182.069
148515	66.92	1.01268	8.975		35.0568	10.1471	182.049
148715	66.98	1.01366	8.977		35.0882	10.1569	182.089
148915	67.14	1.0146	8.979		35.172	10.1663	182.13
149116	67.16	1.01559	8.978		35.1825	10.1763	182.11
149316	67.26	1.01656	8.977		35.2349	10.186	182.089
149517	67.34	1.01753	8.977		35.2768	10.1957	182.089
149717	67.38	1.01852	8.979		35.2978	10.2056	182.13
149917	67.54	1.01936	8.978		35.3816	10.214	182.11
150118	67.64	1.02033	8.976		35.434	10.2237	182.069
150318	67.72	1.0213	8.977		35.4759	10.2335	182.089
150520	67.82	1.02226	8.979		35.5283	10.2431	182.13
150721	67.8	1.02347	8.974		35.5178	10.2552	182.028
150921	67.86	1.02445	8.977		35.5492	10.265	182.089
151121	68.04	1.02529	8.977		35.6435	10.2734	182.089
151322	68.04	1.02629	8.975		35.6435	10.2835	182.049
151522	68.28	1.0271	8.98		35.7692	10.2916	182.15
151723	68.28	1.0281	8.978		35.7692	10.3016	182.11
151923	68.36	1.02927	8.979		35.8112	10.3133	182.13
152123	68.42	1.03015	8.978		35.8426	10.3221	182.11
152324	68.64	1.03108	8.977		35.9578	10.3315	182.089
152524	68.6	1.03219	8.977		35.9369	10.3426	182.089
152725	68.7	1.03316	8.978		35.9893	10.3523	182.11
152925	68.74	1.03414	8.975		36.0102	10.3621	182.049
153125	68.88	1.03509	8.976		36.0836	10.3716	182.069
153326	68.9	1.03598	8.976		36.094	10.3806	182.069
153526	68.92	1.03698	8.977		36.1045	10.3906	182.089
153728	69.06	1.03783	8.98		36.1779	10.3991	182.15
153929	69.14	1.0389	8.975		36.2198	10.4098	182.049
154129	69.16	1.03989	8.978		36.2302	10.4197	182.11
154329	69.22	1.04067	8.978		36.2617	10.4276	182.11
154530	69.24	1.04177	8.977		36.2722	10.4386	182.089
154730	69.42	1.0426	8.98		36.3664	10.4469	182.15
154931	69.5	1.04358	8.975		36.4084	10.4567	182.049
155131	69.6	1.04454	8.976		36.4607	10.4663	182.069
155331	69.66	1.04542	8.977		36.4922	10.4752	182.089
155532	69.78	1.04638	8.979		36.555	10.4848	182.13
155732	69.8	1.04747	8.978		36.5655	10.4957	182.11
155933	69.86	1.04855	8.977		36.5969	10.5065	182.089
156133	70	1.0496	8.977		36.6703	10.517	182.089
156333	70.12	1.05056	8.976		36.7332	10.5267	182.069
156534	70.14	1.05155	8.979		36.7436	10.5366	182.13
156734	70.28	1.0527	8.98		36.817	10.5481	182.15
156936	70.32	1.05369	8.976		36.8379	10.558	182.069
157137	70.48	1.05463	8.975		36.9217	10.5674	182.049
157337	70.4	1.05556	8.979		36.8798	10.5768	182.13
157537	70.5	1.05663	8.977		36.9322	10.5875	182.089
157738	70.6	1.05769	8.977		36.9846	10.5981	182.089
157938	70.7	1.05856	8.975		37.037	10.6068	182.049
158139	70.74	1.05944	8.978		37.0579	10.6156	182.11
158339	70.88	1.06029	8.977		37.1313	10.6241	182.089
158539	70.82	1.06141	8.98		37.0999	10.6354	182.15
158740	70.9	1.06229	8.975		37.1418	10.6442	182.049
158940	71.02	1.06334	8.978		37.2046	10.6547	182.11
159141	71.04	1.06414	8.976		37.2151	10.6627	182.069
159341	71.08	1.06522	8.977		37.2361	10.6735	182.089
159541	71.32	1.06604	8.977		37.3618	10.6818	182.089
159742	71.4	1.06711	8.973		37.4037	10.6925	182.008
159942	71.46	1.06789	8.979		37.4351	10.7003	182.13
160143	71.64	1.06903	8.978		37.5294	10.7117	182.11
160343	71.64	1.07003	8.978		37.5294	10.7217	182.11
160543	71.7	1.07111	8.979		37.5609	10.7326	182.13
160744	71.72	1.072	8.978		37.5713	10.7415	182.11
160944	71.84	1.07306	8.976		37.6342	10.7521	182.069
161146	71.9	1.07414	8.978		37.6656	10.7629	182.11
161347	71.92	1.07513	8.977		37.6761	10.7728	182.089
161547	71.98	1.07611	8.977		37.7075	10.7827	182.089
161747	72.08	1.07707	8.978		37.7599	10.7923	182.11
161948	72.18	1.07814	8.978		37.8123	10.803	182.11
162148	72.24	1.07892	8.979		37.8437	10.8108	182.13
162349	72.3	1.08	8.974		37.8752	10.8216	182.028
162549	72.36	1.08087	8.976		37.9066	10.8304	182.069
162749	72.5	1.08173	8.98		37.9799	10.839	182.15
162950	72.6	1.08279	8.977		38.0323	10.8496	182.089
163150	72.64	1.08368	8.979		38.0533	10.8585	182.13
163351	72.82	1.08451	8.98		38.1476	10.8668	182.15
163551	72.88	1.08549	8.977		38.179	10.8767	182.089
163751	72.94	1.08667	8.979		38.2104	10.8885	182.13
163952	73.06	1.08763	8.975		38.2733	10.8981	182.049
164152	73.1	1.08861	8.977		38.2943	10.9079	182.089
164354	73.2	1.08948	8.977		38.3466	10.9166	182.089
164555	73.36	1.09052	8.978		38.4305	10.9271	182.11
164755	73.28	1.09155	8.978		38.3886	10.9374	182.11
164955	73.38	1.09242	8.977		38.4409	10.9461	182.089
165156	73.4	1.09341	8.977		38.4514	10.956	182.089
165356	73.46	1.09449	8.982		38.4828	10.9668	182.191
165557	73.64	1.09533	8.979		38.5771	10.9753	182.13
165757	73.64	1.09633	8.975		38.5771	10.9853	182.049
165957	73.72	1.0973	8.978		38.6191	10.995	182.11
166158	73.74	1.09829	8.977		38.6295	11.0049	182.089
166358	73.9	1.09924	8.98		38.7133	11.0144	182.15
166559	73.94	1.10022	8.976		38.7343	11.0242	182.069
166759	74.06	1.10118	8.979		38.7972	11.0339	182.13
166959	74.08	1.10197	8.978		38.8076	11.0418	182.11
167160	74.14	1.10305	8.979		38.8391	11.0526	182.13
167360	74.24	1.10392	8.979		38.8915	11.0613	182.13
167562	74.38	1.10497	8.979		38.9648	11.0718	182.13
167763	74.38	1.10587	8.975		38.9648	11.0809	182.049
167963	74.34	1.10688	8.979		38.9438	11.091	182.13
168163	74.52	1.10782	8.977		39.0381	11.1004	182.089
168364	74.58	1.1088	8.979		39.0696	11.1102	182.13
168564	74.74	1.11024	8.976		39.1534	11.1246	182.069
168765	74.86	1.1115	8.976		39.2163	11.1373	182.069
168965	74.86	1.1124	8.979		39.2163	11.1463	182.13
169165	74.96	1.11356	8.977		39.2686	11.1579	182.089
169366	74.96	1.11446	8.978		39.2686	11.1669	182.11
169566	75.02	1.11534	8.977		39.3001	11.1758	182.089
169767	75.14	1.1162	8.977		39.3629	11.1844	182.089
169967	75.3	1.11714	8.975		39.4468	11.1938	182.049
170167	75.36	1.11802	8.977		39.4782	11.2026	182.089
170368	75.42	1.119	8.977		39.5096	11.2124	182.089
170568	75.46	1.11999	8.978		39.5306	11.2223	182.11
170770	75.48	1.12098	8.979		39.541	11.2323	182.13
170971	75.58	1.12205	8.975		39.5934	11.243	182.049
171171	75.74	1.12299	8.976		39.6773	11.2524	182.069
171371	75.66	1.12402	8.979		39.6353	11.2627	182.13
171572	75.8	1.12487	8.977		39.7087	11.2712	182.089
171772	75.92	1.12573	8.976		39.7715	11.2799	182.069
171973	76	1.1267	8.978		39.8135	11.2896	182.11
172173	75.94	1.12772	8.977		39.782	11.2998	182.089
172373	76.04	1.12869	8.978		39.8344	11.3095	182.11
172574	76.12	1.12966	8.977		39.8763	11.3192	182.089
172774	76.28	1.1304	8.975		39.9601	11.3267	182.049
172975	76.26	1.13161	8.977		39.9497	11.3388	182.089
173175	76.4	1.13256	8.98		40.023	11.3483	182.15
173375	76.5	1.13342	8.977		40.0754	11.3569	182.089
173576	76.52	1.13442	8.974		40.0859	11.3669	182.028
173776	76.72	1.13535	8.979		40.1906	11.3763	182.13
173978	76.66	1.13627	8.979		40.1592	11.3855	182.13
174179	76.9	1.13729	8.978		40.2849	11.3957	182.11
174379	76.88	1.13829	8.977		40.2745	11.4057	182.089
174579	76.94	1.13927	8.977		40.3059	11.4155	182.089
174780	77.08	1.14022	8.978		40.3792	11.4251	182.11
174980	77.04	1.14114	8.978		40.3583	11.4343	182.11
175181	77.16	1.14219	8.977		40.4211	11.4448	182.089
175381	77.18	1.14319	8.977		40.4316	11.4548	182.089
175581	77.22	1.14407	8.978		40.4526	11.4636	182.11
175782	77.38	1.14512	8.98		40.5364	11.4741	182.15
175982	77.46	1.14599	8.978		40.5783	11.4829	182.11
176183	77.58	1.14705	8.977		40.6412	11.4935	182.089
176383	77.68	1.14791	8.976		40.6935	11.5021	182.069
176583	77.68	1.14901	8.977		40.6935	11.5131	182.089
176784	77.82	1.14996	8.98		40.7669	11.5226	182.15
176984	77.88	1.15094	8.979		40.7983	11.5325	182.13
177186	77.94	1.15192	8.976		40.8297	11.5423	182.069
177387	77.98	1.15281	8.977		40.8507	11.5512	182.089
177587	77.94	1.15392	8.975		40.8297	11.5623	182.049
177787	78.12	1.15476	8.977		40.924	11.5707	182.089
177988	78.32	1.15569	8.979		41.0288	11.5801	182.13
178188	78.3	1.1567	8.976		41.0183	11.5902	182.069
178389	78.36	1.15767	8.977		41.0498	11.5999	182.089
178589	78.44	1.15865	8.979		41.0917	11.6097	182.13
178789	78.52	1.15962	8.977		41.1336	11.6194	182.089
178990	78.6	1.16049	8.977		41.1755	11.6282	182.089
179190	78.64	1.16158	8.976		41.1964	11.6391	182.069
179391	78.66	1.16247	8.977		41.2069	11.648	182.089
179591	78.66	1.16347	8.978		41.2069	11.658	182.11
179791	78.78	1.16443	8.977		41.2698	11.6676	182.089
179992	78.94	1.16537	8.978		41.3536	11.6771	182.11
180192	78.92	1.16628	8.975		41.3431	11.6862	182.049
180393	79	1.16725	8.978		41.385	11.6959	182.11
180593	79.12	1.16811	8.979		41.4479	11.7045	182.13
180793	79.16	1.16919	8.979		41.4689	11.7153	182.13
180994	79.44	1.1703	8.975		41.6155	11.7265	182.049
181194	79.34	1.17133	8.976		41.5632	11.7368	182.069
181396	79.46	1.17229	8.98		41.626	11.7464	182.15
181597	79.52	1.17367	8.977		41.6574	11.7602	182.089
181797	79.72	1.1748	8.974		41.7622	11.7715	182.028
181997	79.82	1.17606	8.978		41.8146	11.7842	182.11
182198	79.86	1.17695	8.978		41.8356	11.7931	182.11
182398	79.86	1.17795	8.975		41.8356	11.8031	182.049
182599	79.94	1.17862	8.98		41.8775	11.8098	182.15
182799	79.94	1.17952	8.977		41.8775	11.8188	182.089
182999	79.96	1.18051	8.976		41.8879	11.8288	182.069
183200	80.1	1.18147	8.977		41.9613	11.8384	182.089
183400	80.16	1.18244	8.979		41.9927	11.8481	182.13
183601	80.28	1.1834	8.977		42.0556	11.8577	182.089
183801	80.34	1.18428	8.977		42.087	11.8665	182.089
184001	80.32	1.18529	8.977		42.0765	11.8767	182.089
184202	80.4	1.18646	8.979		42.1184	11.8884	182.13
184402	80.52	1.18732	8.975		42.1813	11.897	182.049
184604	80.78	1.18813	8.978		42.3175	11.9051	182.11
184805	80.72	1.18925	8.98		42.2861	11.9163	182.15
185005	80.84	1.19011	8.979		42.3489	11.9249	182.13
185205	80.9	1.19099	8.977		42.3804	11.9338	182.089
185406	80.98	1.19196	8.979		42.4223	11.9435	182.13
185606	81	1.19275	8.979		42.4328	11.9514	182.13
185807	81.04	1.19384	8.978		42.4537	11.9623	182.11
186007	81.1	1.19481	8.978		42.4851	11.972	182.11
186207	81.16	1.19579	8.979		42.5166	11.9819	182.13
186408	81.3	1.19675	8.978		42.5899	11.9915	182.11
186608	81.38	1.19772	8.979		42.6318	12.0012	182.13
186809	81.46	1.19859	8.975		42.6737	12.0099	182.049
187009	81.44	1.1996	8.977		42.6633	12.02	182.089
187209	81.6	1.20054	8.978		42.7471	12.0295	182.11
187410	81.64	1.20153	8.978		42.768	12.0394	182.11
187610	81.76	1.20258	8.975		42.8309	12.0499	182.049
187812	81.84	1.20376	8.979		42.8728	12.0617	182.13
188013	81.98	1.20461	8.976		42.9461	12.0702	182.069
188213	82.08	1.20567	8.978		42.9985	12.0809	182.11
188413	82.1	1.20657	8.979		43.009	12.0899	182.13
188614	82.08	1.20747	8.976		42.9985	12.0989	182.069
188814	82.2	1.20843	8.978		43.0614	12.1085	182.11
189015	82.2	1.20943	8.975		43.0614	12.1185	182.049
189215	82.34	1.21038	8.977		43.1347	12.1281	182.089
189415	82.44	1.21135	8.977		43.1871	12.1378	182.089
189616	82.44	1.21235	8.979		43.1871	12.1478	182.13
189816	82.6	1.21339	8.978		43.2709	12.1582	182.11
190017	82.56	1.2143	8.975		43.25	12.1673	182.049
190217	82.8	1.21512	8.982		43.3757	12.1756	182.191
190417	82.76	1.21613	8.977		43.3548	12.1857	182.089
190618	82.86	1.2171	8.977		43.4071	12.1954	182.089
190818	82.98	1.21816	8.979		43.47	12.206	182.13
191020	83.04	1.21924	8.978		43.5014	12.2168	182.11
191221	83.12	1.22011	8.981		43.5433	12.2256	182.17
191421	83.16	1.22129	8.978		43.5643	12.2374	182.11
191621	83.18	1.22219	8.976		43.5748	12.2464	182.069
191822	83.26	1.22316	8.977		43.6167	12.2561	182.089
192022	83.36	1.22422	8.979		43.6691	12.2667	182.13
192223	83.36	1.22502	8.977		43.6691	12.2747	182.089
192423	83.5	1.22608	8.978		43.7424	12.2854	182.11
192623	83.58	1.22705	8.979		43.7843	12.2951	182.13
192824	83.66	1.22792	8.977		43.8262	12.3038	182.089
193024	83.82	1.22896	8.979		43.9101	12.3142	182.13
193225	83.84	1.22996	8.975		43.9205	12.3242	182.049
193425	83.9	1.23084	8.977		43.952	12.3331	182.089
193625	83.98	1.23191	8.977		43.9939	12.3438	182.089
193826	84.08	1.23297	8.977		44.0463	12.3544	182.089
194026	84.18	1.23384	8.978		44.0986	12.3631	182.11
194228	84.34	1.23488	8.976		44.1825	12.3735	182.069
194429	84.36	1.23577	8.976		44.1929	12.3825	182.069
194629	84.36	1.23677	8.981		44.1929	12.3925	182.17
194829	84.38	1.23767	8.979		44.2034	12.4015	182.13
195030	84.44	1.23885	8.98		44.2348	12.4133	182.15
195230	84.5	1.23972	8.978		44.2663	12.422	182.11
195431	84.72	1.24065	8.977		44.3815	12.4314	182.089
195631	84.62	1.24158	8.979		44.3291	12.4407	182.13
195831	84.72	1.24265	8.979		44.3815	12.4514	182.13
196032	84.86	1.2435	8.979		44.4549	12.4599	182.13
196232	84.86	1.2446	8.978		44.4549	12.4709	182.11
196433	84.94	1.24547	8.979		44.4968	12.4797	182.13
196633	85.06	1.24653	8.977		44.5596	12.4903	182.089
196833	85.06	1.24743	8.977		44.5596	12.4993	182.089
197034	85.12	1.24851	8.978		44.5911	12.5101	182.11
197234	85.3	1.24944	8.977		44.6854	12.5194	182.089
197436	85.32	1.25044	8.978		44.6958	12.5295	182.11
197637	85.38	1.25132	8.977		44.7273	12.5383	182.089
197837	85.42	1.2523	8.975		44.7482	12.5481	182.049
198037	85.52	1.25337	8.977		44.8006	12.5588	182.089
198238	85.66	1.25422	8.977		44.874	12.5673	182.089
198438	85.64	1.25533	8.979		44.8635	12.5785	182.13
198639	85.72	1.2562	8.975		44.9054	12.5872	182.049
198839	85.7	1.2571	8.979		44.8949	12.5962	182.13
199039	85.78	1.25808	8.977		44.9368	12.606	182.089
199240	85.94	1.25902	8.977		45.0206	12.6154	182.089
199440	86.06	1.25998	8.976		45.0835	12.6251	182.069
199641	86	1.261	8.977		45.0521	12.6353	182.089
199841	86.1	1.26187	8.981		45.1045	12.644	182.17
200041	86.18	1.26294	8.977		45.1464	12.6547	182.089
200242	86.14	1.26385	8.978		45.1254	12.6638	182.11
200442	86.22	1.26492	8.975		45.1673	12.6745	182.049
200643	86.42	1.26595	8.979		45.2721	12.6849	182.13
200843	86.44	1.26705	8.978		45.2826	12.6959	182.11
201043	86.56	1.2679	8.977		45.3454	12.7044	182.089
201244	86.76	1.26883	8.978		45.4502	12.7137	182.11
201444	86.7	1.26986	8.975		45.4188	12.724	182.049
201646	86.86	1.2708	8.978		45.5026	12.7335	182.11
201847	86.88	1.27179	8.975		45.5131	12.7434	182.049
202047	87	1.27275	8.977		45.5759	12.753	182.089
202247	86.9	1.27368	8.975		45.5235	12.7623	182.049
202448	87.04	1.27484	8.975		45.5969	12.7739	182.049
202648	87.08	1.27582	8.977		45.6178	12.7838	182.089
202849	87.24	1.27677	8.978		45.7017	12.7933	182.11
203049	87.34	1.27773	8.979		45.754	12.8029	182.13
203249	87.38	1.27892	8.982		45.775	12.8148	182.191
203450	87.48	1.28008	8.978		45.8274	12.8265	182.11
203650	87.62	1.28103	8.975		45.9007	12.836	182.049
203851	87.56	1.28215	8.977		45.8693	12.8472	182.089
204051	87.66	1.28312	8.976		45.9217	12.8569	182.069
204251	87.74	1.28399	8.977		45.9636	12.8656	182.089
204452	87.72	1.2849	8.979		45.9531	12.8747	182.13
204652	87.84	1.28586	8.977		46.016	12.8844	182.089
204854	87.96	1.28691	8.978		46.0788	12.8949	182.11
205055	88.14	1.28765	8.979		46.1731	12.9023	182.13
205255	88.22	1.28852	8.979		46.215	12.911	182.13
205455	88.18	1.28964	8.98		46.1941	12.9222	182.15
205656	88.36	1.29057	8.977		46.2884	12.9316	182.089
205856	88.26	1.29161	8.978		46.236	12.942	182.11
206057	88.36	1.29257	8.978		46.2884	12.9516	182.11
206257	88.48	1.29353	8.979		46.3512	12.9612	182.13
206457	88.48	1.29443	8.978		46.3512	12.9702	182.11
206658	88.66	1.29537	8.977		46.4455	12.9797	182.089
206858	88.78	1.29643	8.979		46.5084	12.9903	182.13
207059	88.84	1.29731	8.976		46.5398	12.9991	182.069
207259	88.8	1.29822	8.977		46.5189	13.0082	182.089
207459	88.94	1.29927	8.979		46.5922	13.0187	182.13
207660	89.04	1.30014	8.976		46.6446	13.0275	182.069
207860	89.04	1.30114	8.978		46.6446	13.0375	182.11
208062	89.12	1.30211	8.974		46.6865	13.0472	182.028
208263	89.18	1.30309	8.976		46.7179	13.057	182.069
208463	89.3	1.30404	8.982		46.7808	13.0665	182.191
208663	89.32	1.30504	8.975		46.7913	13.0766	182.049
208864	89.42	1.3059	8.979		46.8437	13.0852	182.13
209064	89.48	1.30688	8.978		46.8751	13.095	182.11
209265	89.56	1.30795	8.974		46.917	13.1057	182.028
209465	89.76	1.30878	8.979		47.0218	13.114	182.13
209665	89.7	1.30991	8.977		46.9904	13.1254	182.089
209866	89.76	1.31068	8.977		47.0218	13.1331	182.089
210066	89.86	1.31185	8.977		47.0742	13.1448	182.089
210267	89.84	1.31296	8.977		47.0637	13.1559	182.089
210467	90	1.3139	8.976		47.1475	13.1653	182.069
210667	90.02	1.31489	8.977		47.158	13.1753	182.089
210868	90.14	1.31595	8.977		47.2209	13.1859	182.089
211068	90.16	1.31694	8.977		47.2313	13.1958	182.089
211270	90.2	1.31793	8.977		47.2523	13.2057	182.089
211471	90.26	1.31881	8.976		47.2837	13.2145	182.069
211671	90.26	1.31991	8.978		47.2837	13.2256	182.11
211871	90.38	1.32087	8.977		47.3466	13.2352	182.089
212072	90.42	1.32175	8.977		47.3675	13.244	182.089
212272	90.46	1.32274	8.979		47.3885	13.2539	182.13
212473	90.6	1.32359	8.977		47.4618	13.2624	182.089
212673	90.72	1.32465	8.975		47.5247	13.273	182.049
212873	90.84	1.32561	8.978		47.5876	13.2827	182.11
213074	90.84	1.32661	8.982		47.5876	13.2927	182.191
213274	90.9	1.32758	8.977		47.619	13.3024	182.089
213475	90.98	1.32856	8.976		47.6609	13.3122	182.069
213675	90.98	1.32946	8.977		47.6609	13.3212	182.089
213875	91.06	1.33063	8.977		47.7028	13.333	182.089
214076	91.2	1.33148	8.974		47.7761	13.3415	182.028
214276	91.24	1.33227	8.975		47.7971	13.3494	182.049
214478	91.3	1.33325	8.977		47.8285	13.3592	182.089
214679	91.38	1.33432	8.978		47.8704	13.3699	182.11
214879	91.46	1.33529	8.978		47.9124	13.3797	182.11
215079	91.62	1.33633	8.982		47.9962	13.3901	182.191
215280	91.54	1.33746	8.979		47.9543	13.4014	182.13
215480	91.66	1.33842	8.979		48.0171	13.411	182.13
215681	91.82	1.33926	8.98		48.1009	13.4194	182.15
215881	91.84	1.34026	8.977		48.1114	13.4295	182.089
216081	91.9	1.34123	8.979		48.1428	13.4392	182.13
216282	91.96	1.34211	8.977		48.1743	13.448	182.089
216482	91.98	1.34331	8.978		48.1848	13.46	182.11
216683	92.04	1.34429	8.976		48.2162	13.4698	182.069
216883	92.1	1.34517	8.979		48.2476	13.4787	182.13
217083	92.1	1.34607	8.977		48.2476	13.4877	182.089
217284	92.24	1.34702	8.979		48.321	13.4972	182.13
217484	92.24	1.34812	8.978		48.321	13.5082	182.11
217686	92.36	1.34897	8.975		48.3838	13.5167	182.049
217887	92.5	1.34993	8.977		48.4572	13.5264	182.089
218087	92.48	1.35083	8.977		48.4467	13.5354	182.089
218287	92.6	1.35179	8.975		48.5096	13.545	182.049
218488	92.64	1.35268	8.977		48.5305	13.5539	182.089
218688	92.7	1.35376	8.977		48.5619	13.5647	182.089
218889	92.72	1.35475	8.976		48.5724	13.5746	182.069
219089	92.84	1.35571	8.978		48.6353	13.5843	182.11
219289	92.94	1.35677	8.976		48.6877	13.5949	182.069
219490	93.04	1.35764	8.977		48.7401	13.6036	182.089
219690	93.06	1.35853	8.979		48.7505	13.6125	182.13
219891	93.12	1.35961	8.977		48.782	13.6233	182.089
220091	93.22	1.36057	8.976		48.8343	13.633	182.069
220291	93.24	1.36147	8.975		48.8448	13.642	182.049
220492	93.28	1.36245	8.977		48.8658	13.6518	182.089
220692	93.38	1.36342	8.977		48.9182	13.6615	182.089
220893	93.46	1.36439	8.979		48.9601	13.6712	182.13
221093	93.46	1.36559	8.978		48.9601	13.6833	182.11
221293	93.54	1.36646	8.979		49.002	13.692	182.13
221494	93.7	1.36761	8.982		49.0858	13.7035	182.191
221694	93.68	1.36861	8.978		49.0753	13.7135	182.11
221896	93.74	1.36969	8.977		49.1068	13.7243	182.089
222097	93.9	1.37063	8.977		49.1906	13.7338	182.089
222297	94.02	1.37159	8.977		49.2534	13.7434	182.089
222497	94.02	1.37239	8.978		49.2534	13.7514	182.11
222698	94.1	1.37346	8.979		49.2953	13.7621	182.13
222898	94.18	1.37454	8.977		49.3373	13.7729	182.089
223099	94.18	1.37554	8.977		49.3373	13.783	182.089
223299	94.3	1.37639	8.975		49.4001	13.7915	182.049
223499	94.3	1.3774	8.974		49.4001	13.8016	182.028
223700	94.5	1.37832	8.974		49.5049	13.8108	182.028
223900	94.52	1.37932	8.977		49.5154	13.8208	182.089
224101	94.54	1.38051	8.975		49.5258	13.8328	182.049
224301	94.6	1.38149	8.978		49.5573	13.8426	182.11
224501	94.76	1.38233	8.977		49.6411	13.851	182.089
224702	94.76	1.38323	8.979		49.6411	13.86	182.13
224902	94.88	1.38449	8.979		49.704	13.8726	182.13
225104	94.94	1.38527	8.979		49.7354	13.8805	182.13
225305	94.9	1.38628	8.978		49.7144	13.8906	182.11
225505	94.96	1.38736	8.98		49.7459	13.9014	182.15
225705	95.02	1.38814	8.979		49.7773	13.9092	182.13
225906	95.12	1.38921	8.979		49.8297	13.9199	182.13
226106	95.12	1.39011	8.978		49.8297	13.929	182.11
226307	95.2	1.39108	8.977		49.8716	13.9387	182.089
226507	95.32	1.39204	8.978		49.9345	13.9483	182.11
226707	95.4	1.39291	8.979		49.9764	13.957	182.13
226908	95.54	1.39416	8.977		50.0497	13.9695	182.089
227108	95.68	1.39531	8.976		50.123	13.9811	182.069
227309	95.7	1.39661	8.975		50.1335	13.9941	182.049
227509	95.82	1.39746	8.976		50.1964	14.0026	182.069
227709	95.78	1.39848	8.977		50.1754	14.0128	182.089
227910	95.8	1.39947	8.977		50.1859	14.0227	182.089
228110	95.8	1.40037	8.979		50.1859	14.0318	182.13
228312	95.94	1.40122	8.977		50.2592	14.0403	182.089
228513	96.02	1.40219	8.975		50.3012	14.05	182.049
228713	96.04	1.40299	8.976		50.3116	14.058	182.069
228913	96.06	1.40398	8.975		50.3221	14.0679	182.049
229114	96.18	1.40494	8.975		50.385	14.0776	182.049
229314	96.2	1.40593	8.977		50.3955	14.0875	182.089
229515	96.16	1.40694	8.977		50.3745	14.0976	182.089
229715	96.32	1.40789	8.976		50.4583	14.1071	182.069
229915	96.5	1.40883	8.976		50.5526	14.1165	182.069
230116	96.54	1.40971	8.978		50.5736	14.1254	182.11
230316	96.52	1.41082	8.975		50.5631	14.1365	182.049
230517	96.7	1.41176	8.978		50.6574	14.1459	182.11
230717	96.84	1.41271	8.977		50.7307	14.1554	182.089
230917	96.78	1.41363	8.976		50.6993	14.1646	182.069
231118	96.94	1.41467	8.978		50.7831	14.1751	182.11
231318	96.94	1.41567	8.978		50.7831	14.1851	182.11
231520	96.96	1.41656	8.978		50.7936	14.194	182.11
231721	97.02	1.41754	8.979		50.825	14.2038	182.13
231921	97.06	1.41863	8.978		50.846	14.2147	182.11
232121	97.12	1.41951	8.976		50.8774	14.2235	182.069
232322	97.16	1.42049	8.977		50.8984	14.2334	182.089
232522	97.12	1.42141	8.979		50.8774	14.2426	182.13
232723	97.16	1.42239	8.979		50.8984	14.2524	182.13
232923	97.36	1.42332	8.978		51.0031	14.2617	182.11
233123	97.34	1.42443	8.977		50.9927	14.2728	182.089
233324	97.52	1.42527	8.978		51.0869	14.2813	182.11
233524	97.56	1.42635	8.976		51.1079	14.2921	182.069
233725	97.5	1.42738	8.975		51.0765	14.3024	182.049
233925	97.58	1.42825	8.973		51.1184	14.3111	182.008
234125	97.84	1.42916	8.979		51.2546	14.3202	182.13
234326	97.7	1.43011	8.978		51.1812	14.3298	182.11
234526	97.82	1.43116	8.979		51.2441	14.3403	182.13
234728	97.9	1.43203	8.975		51.286	14.349	182.049
234929	97.98	1.43311	8.979		51.3279	14.3598	182.13
235129	98.06	1.43418	8.98		51.3698	14.3705	182.15
235329	98.1	1.43517	8.977		51.3908	14.3805	182.089
235530	98.16	1.43614	8.976		51.4222	14.3902	182.069
235730	98.24	1.43712	8.979		51.4641	14.4	182.13
235931	98.24	1.43812	8.979		51.4641	14.41	182.13
236131	98.38	1.43907	8.979		51.5375	14.4195	182.13
236331	98.42	1.43995	8.98		51.5584	14.4284	182.15
236532	98.46	1.44094	8.979		51.5794	14.4383	182.13
236732	98.54	1.44181	8.98		51.6213	14.447	182.15
236933	98.6	1.44289	8.978		51.6527	14.4578	182.11
237133	98.76	1.44383	8.98		51.7365	14.4672	182.15
237333	98.72	1.44485	8.977		51.7156	14.4775	182.089
237534	98.82	1.44581	8.977		51.768	14.4871	182.089
237734	98.9	1.44688	8.976		51.8099	14.4978	182.069
237936	98.9	1.44779	8.976		51.8099	14.5069	182.069
238137	99.1	1.44871	8.979		51.9147	14.5161	182.13
238337	99.06	1.44973	8.978		51.8937	14.5264	182.11
238537	99.16	1.45069	8.975		51.9461	14.536	182.049
238738	99.18	1.45169	8.978		51.9566	14.546	182.11
238938	99.28	1.45255	8.978		52.0089	14.5546	182.11
239139	99.26	1.45356	8.978		51.9985	14.5647	182.11
239339	99.38	1.45452	8.981		52.0613	14.5743	182.17
239539	99.46	1.45549	8.977		52.1032	14.5841	182.089
239740	99.6	1.45644	8.978		52.1766	14.5936	182.11
239940	99.58	1.45745	8.977		52.1661	14.6037	182.089
240141	99.7	1.45851	8.978		52.229	14.6143	182.11
240341	99.76	1.45948	8.98		52.2604	14.624	182.15
240541	99.72	1.4605	8.978		52.2394	14.6343	182.11
240742	99.76	1.46168	8.978		52.2604	14.6461	182.11
240942	99.84	1.46246	8.978		52.3023	14.6539	182.11
241143	99.94	1.46342	8.979		52.3547	14.6635	182.13
241343	100	1.4644	8.977		52.3861	14.6733	182.089
241543	100.08	1.46537	8.976		52.428	14.6831	182.069
241744	100.08	1.46627	8.977		52.428	14.6921	182.089
241944	100.16	1.46734	8.977		52.4699	14.7028	182.089
242146	100.26	1.46831	8.981		52.5223	14.7125	182.17
242347	100.42	1.46925	8.978		52.6061	14.7219	182.11
242547	100.46	1.47034	8.978		52.6271	14.7329	182.11
242747	100.48	1.47133	8.975		52.6376	14.7428	182.049
242948	100.44	1.47225	8.977		52.6166	14.752	182.089
243148	100.56	1.4731	8.976		52.6795	14.7605	182.069
243349	100.54	1.47421	8.979		52.669	14.7716	182.13
243549	100.64	1.47508	8.976		52.7214	14.7804	182.069
243749	100.64	1.47618	8.977		52.7214	14.7914	182.089
243950	100.72	1.47715	8.976		52.7633	14.8011	182.069
244150	100.88	1.47809	8.977		52.8471	14.8105	182.089
244351	100.96	1.47906	8.977		52.889	14.8202	182.089
244551	101.02	1.48004	8.979		52.9205	14.8301	182.13
244751	101.12	1.48111	8.975		52.9729	14.8408	182.049
244952	101.3	1.48205	8.978		53.0671	14.8502	182.11
245152	101.2	1.48318	8.979		53.0148	14.8615	182.13
245354	101.36	1.48412	8.977		53.0986	14.8709	182.089
245555	101.36	1.48512	8.977		53.0986	14.881	182.089
245755	101.38	1.48622	8.98		53.1091	14.892	182.15
245955	101.52	1.48707	8.978		53.1824	14.9005	182.11
246156	101.48	1.48798	8.977		53.1614	14.9096	182.089
246356	101.6	1.48894	8.978		53.2243	14.9192	182.11
246557	101.64	1.49003	8.977		53.2453	14.9302	182.089
246757	101.76	1.49088	8.979		53.3081	14.9387	182.13
246957	101.66	1.49182	8.979		53.2557	14.9481	182.13
247158	101.86	1.49295	8.979		53.3605	14.9594	182.13
247358	101.9	1.49404	8.98		53.3815	14.9703	182.15
247559	101.9	1.49523	8.978		53.3815	14.9823	182.11
247759	102.04	1.49619	8.975		53.4548	14.9919	182.049
247959	102	1.4971	8.977		53.4338	15.001	182.089
248160	102.18	1.49804	8.979		53.5281	15.0104	182.13
248360	102.16	1.49914	8.977		53.5177	15.0214	182.089
248562	102.2	1.49993	8.976		53.5386	15.0294	182.069
248763	102.28	1.501	8.977		53.5805	15.0401	182.089
248963	102.4	1.50186	8.976		53.6434	15.0487	182.069
249163	102.48	1.50283	8.975		53.6853	15.0584	182.049
249364	102.48	1.50383	8.976		53.6853	15.0684	182.069
249564	102.66	1.50467	8.977		53.7796	15.0769	182.089
249765	102.62	1.50578	8.975		53.7586	15.088	182.049
249965	102.64	1.50668	8.98		53.7691	15.097	182.15
250165	102.72	1.50755	8.974		53.811	15.1057	182.028
250366	102.78	1.50863	8.982		53.8425	15.1165	182.191
250566	102.82	1.50961	8.976		53.8634	15.1264	182.069
250767	102.86	1.5105	8.977		53.8844	15.1353	182.089
250967	102.96	1.51156	8.975		53.9368	15.1459	182.049
251167	102.88	1.51249	8.975		53.8948	15.1552	182.049
251368	103.06	1.51333	8.978		53.9891	15.1636	182.11
251568	103.08	1.51442	8.977		53.9996	15.1745	182.089
251770	103.12	1.51541	8.978		54.0206	15.1845	182.11
251971	103.2	1.51638	8.978		54.0625	15.1942	182.11
252171	103.24	1.51737	8.979		54.0834	15.2041	182.13
252371	103.34	1.51833	8.974		54.1358	15.2137	182.028
252572	103.44	1.5194	8.975		54.1882	15.2244	182.049
252772	103.54	1.52046	8.98		54.2406	15.2351	182.15
252973	103.58	1.52135	8.977		54.2615	15.244	182.089
253173	103.58	1.52245	8.978		54.2615	15.255	182.11
253373	103.6	1.52334	8.977		54.272	15.2639	182.089
253574	103.7	1.52441	8.981		54.3244	15.2746	182.17
253774	103.82	1.52526	8.978		54.3873	15.2832	182.11
253975	103.74	1.52629	8.975		54.3454	15.2935	182.049
254175	103.7	1.52731	8.979		54.3244	15.3037	182.13
254375	103.9	1.52823	8.976		54.4292	15.3129	182.069
254576	103.98	1.52921	8.981		54.4711	15.3227	182.17
254776	103.98	1.53011	8.979		54.4711	15.3318	182.13
254978	104	1.5312	8.978		54.4816	15.3427	182.11
255179	104.14	1.53205	8.978		54.5549	15.3512	182.11
255379	104.26	1.53301	8.977		54.6178	15.3608	182.089
255579	104.3	1.534	8.977		54.6387	15.3707	182.089
255780	104.4	1.53486	8.978		54.6911	15.3794	182.11
255980	104.54	1.53601	8.977		54.7645	15.3909	182.089
256181	104.5	1.53703	8.977		54.7435	15.4011	182.089
256381	104.74	1.53784	8.977		54.8692	15.4092	182.089
256581	104.68	1.53896	8.977		54.8378	15.4204	182.089
256782	104.62	1.53988	8.979		54.8064	15.4297	182.13
256982	104.78	1.54093	8.978		54.8902	15.4402	182.11
257183	104.78	1.54183	8.977		54.8902	15.4492	182.089
257383	105	1.54275	8.978		55.0054	15.4584	182.11
257583	104.96	1.54376	8.977		54.9845	15.4685	182.089
257784	105.02	1.54474	8.981		55.0159	15.4784	182.17
257984	105.1	1.54571	8.977		55.0578	15.4881	182.089
258186	104.98	1.54686	8.977		54.995	15.4996	182.089
258387	105.14	1.5477	8.979		55.0788	15.508	182.13
258587	105.16	1.54859	8.979		55.0892	15.5169	182.13
258787	105.28	1.54965	8.979		55.1521	15.5276	182.13
258988	105.4	1.55061	8.978		55.215	15.5372	182.11
259188	105.5	1.55158	8.979		55.2674	15.5469	182.13
259389	105.48	1.55268	8.976		55.2569	15.5579	182.069
259589	105.5	1.55358	8.976		55.2674	15.5669	182.069
259789	105.58	1.55455	8.978		55.3093	15.5767	182.11
259990	105.64	1.55553	8.977		55.3407	15.5865	182.089
260190	105.68	1.55661	8.977		55.3617	15.5973	182.089
260391	105.66	1.55742	8.979		55.3512	15.6054	182.13
260591	105.82	1.55836	8.976		55.435	15.6148	182.069
260791	105.78	1.55948	8.978		55.414	15.6261	182.11
260992	105.82	1.56036	8.977		55.435	15.6349	182.089
261192	106	1.5616	8.978		55.5293	15.6473	182.11
261393	106.08	1.56257	8.978		55.5712	15.657	182.11
261593	106.22	1.56372	8.977		55.6445	15.6685	182.089
261793	106.18	1.56474	8.978		55.6236	15.6788	182.11
261994	106.24	1.56572	8.975		55.655	15.6886	182.049
262194	106.36	1.56647	8.98		55.7179	15.6961	182.15
262396	106.36	1.56767	8.978		55.7179	15.7081	182.11
262597	106.4	1.56846	8.977		55.7388	15.716	182.089
262797	106.52	1.56932	8.977		55.8017	15.7246	182.089
262997	106.54	1.57031	8.978		55.8122	15.7346	182.11
263198	106.66	1.57137	8.977		55.875	15.7452	182.089
263398	106.7	1.57235	8.977		55.896	15.755	182.089
263599	106.7	1.57335	8.977		55.896	15.765	182.089
263799	106.66	1.57427	8.979		55.875	15.7742	182.13
263999	106.94	1.57527	8.976		56.0217	15.7843	182.069
264200	106.86	1.5763	8.977		55.9798	15.7946	182.089
264400	106.96	1.57706	8.976		56.0322	15.8022	182.069
264601	107.04	1.57814	8.977		56.0741	15.813	182.089
264801	107.04	1.57914	8.981		56.0741	15.823	182.17
265001	107.06	1.58003	8.976		56.0846	15.832	182.069
265202	107	1.58105	8.981		56.0532	15.8422	182.17
265402	107.22	1.58197	8.977		56.1684	15.8514	182.089
265604	107.3	1.58305	8.979		56.2103	15.8622	182.13
265805	107.28	1.58385	8.977		56.1998	15.8702	182.089
266005	107.3	1.58504	8.978		56.2103	15.8822	182.11
266205	107.46	1.58589	8.978		56.2941	15.8907	182.11
266406	107.44	1.5869	8.98		56.2837	15.9008	182.15
266606	107.54	1.58786	8.977		56.336	15.9104	182.089
266807	107.48	1.58898	8.978		56.3046	15.9216	182.11
267007	107.64	1.58993	8.978		56.3884	15.9312	182.11
267207	107.62	1.59103	8.976		56.3779	15.9422	182.069
267408	107.68	1.59201	8.973		56.4094	15.952	182.008
267608	107.94	1.59282	8.977		56.5456	15.9601	182.089
267809	107.88	1.59384	8.978		56.5142	15.9703	182.11
268009	107.88	1.59474	8.978		56.5142	15.9794	182.11
268209	107.96	1.59571	8.977		56.5561	15.9891	182.089
268410	107.9	1.59684	8.978		56.5246	16.0004	182.11
268610	108.06	1.59778	8.975		56.6084	16.0098	182.049
268812	108.2	1.59873	8.979		56.6818	16.0193	182.13
269013	108.24	1.59972	8.979		56.7027	16.0293	182.13
269213	108.3	1.60059	8.974		56.7342	16.038	182.028
269413	108.28	1.6016	8.981		56.7237	16.0481	182.17
269614	108.36	1.60247	8.98		56.7656	16.0568	182.15
269814	108.4	1.60346	8.975		56.7866	16.0667	182.049
270015	108.4	1.60456	8.979		56.7866	16.0778	182.13
270215	108.54	1.60561	8.978		56.8599	16.0883	182.11
270415	108.68	1.60666	8.975		56.9332	16.0988	182.049
270616	108.72	1.60765	8.98		56.9542	16.1087	182.15
270816	108.66	1.60867	8.978		56.9228	16.1189	182.11
271017	108.7	1.60966	8.977		56.9437	16.1289	182.089
271217	108.8	1.61062	8.978		56.9961	16.1385	182.11
271417	108.82	1.61161	8.977		57.0066	16.1484	182.089
271618	108.98	1.61266	8.978		57.0904	16.1589	182.11
271818	108.86	1.6136	8.977		57.0275	16.1683	182.089
272020	109.02	1.61444	8.979		57.1114	16.1768	182.13
272221	109.12	1.61551	8.977		57.1637	16.1875	182.089
272421	109.28	1.61645	8.979		57.2476	16.1969	182.13
272621	109.24	1.61747	8.978		57.2266	16.2071	182.11
272822	109.3	1.61855	8.978		57.258	16.2179	182.11
273022	109.36	1.61952	8.979		57.2895	16.2277	182.13
273223	109.34	1.62053	8.977		57.279	16.2378	182.089
273423	109.46	1.62149	8.975		57.3419	16.2474	182.049
273623	109.52	1.62237	8.979		57.3733	16.2562	182.13
273824	109.48	1.62338	8.981		57.3523	16.2663	182.17
274024	109.7	1.62441	8.976		57.4676	16.2767	182.069
274225	109.72	1.6254	8.978		57.4781	16.2866	182.11
274425	109.72	1.6263	8.979		57.4781	16.2956	182.13
274625	109.76	1.62738	8.977		57.499	16.3064	182.089
274826	109.84	1.62836	8.975		57.5409	16.3162	182.049
275026	109.8	1.62947	8.981		57.52	16.3274	182.17
275228	109.96	1.63031	8.977		57.6038	16.3358	182.089
275429	110.04	1.63129	8.972		57.6457	16.3456	181.988
275629	110.12	1.63226	8.979		57.6876	16.3553	182.13
275829	110.14	1.63325	8.976		57.6981	16.3652	182.069
276030	110.22	1.63432	8.977		57.74	16.376	182.089
276230	110.24	1.63522	8.978		57.7505	16.385	182.11
276431	110.24	1.63612	8.979		57.7505	16.394	182.13
276631	110.28	1.6372	8.979		57.7714	16.4048	182.13
276831	110.44	1.63815	8.977		57.8552	16.4143	182.089
277032	110.52	1.63912	8.978		57.8971	16.424	182.11
277232	110.5	1.64023	8.979		57.8867	16.4352	182.13
277433	110.68	1.64126	8.977		57.981	16.4455	182.089
277633	110.56	1.6425	8.979		57.9181	16.4579	182.13
277833	110.64	1.64338	8.977		57.96	16.4667	182.089
278034	110.72	1.64415	8.977		58.0019	16.4744	182.089
278234	110.72	1.64525	8.977		58.0019	16.4855	182.089
278436	110.92	1.64608	8.979		58.1067	16.4938	182.13
278637	110.94	1.64707	8.977		58.1172	16.5037	182.089
278837	111.04	1.64804	8.977		58.1696	16.5134	182.089
279037	110.86	1.6491	8.976		58.0753	16.524	182.069
279238	110.94	1.65007	8.978		58.1172	16.5338	182.11
279438	111.02	1.65114	8.977		58.1591	16.5445	182.089
279639	111.06	1.65203	8.978		58.18	16.5534	182.11
279839	111.2	1.65298	8.977		58.2534	16.5629	182.089
280039	111.12	1.65391	8.977		58.2115	16.5722	182.089
280240	111.24	1.65487	8.979		58.2743	16.5819	182.13
280440	111.28	1.65585	8.977		58.2953	16.5917	182.089
280641	111.4	1.65681	8.976		58.3581	16.6013	182.069
280841	111.42	1.6578	8.98		58.3686	16.6112	182.15
281041	111.5	1.65878	8.98		58.4105	16.621	182.15
281242	111.64	1.65973	8.977		58.4839	16.6306	182.089
281442	111.6	1.66074	8.976		58.4629	16.6407	182.069
281643	111.6	1.66174	8.978		58.4629	16.6507	182.11
281843	111.74	1.66269	8.978		58.5363	16.6602	182.11
282043	111.7	1.6636	8.979		58.5153	16.6693	182.13
282244	111.76	1.66478	8.975		58.5467	16.6812	182.049
282444	111.9	1.66543	8.978		58.6201	16.6877	182.11
282646	111.88	1.66644	8.977		58.6096	16.6978	182.089
282847	111.88	1.66744	8.978		58.6096	16.7078	182.11
283047	111.92	1.66843	8.978		58.6306	16.7177	182.11
283247	112.02	1.66949	8.981		58.6829	16.7284	182.17
283448	112.16	1.67054	8.978		58.7563	16.7389	182.11
283648	112.22	1.67152	8.98		58.7877	16.7487	182.15
283849	112.24	1.67252	8.978		58.7982	16.7587	182.11
284049	112.3	1.6735	8.976		58.8296	16.7685	182.069
284249	112.32	1.67459	8.979		58.8401	16.7795	182.13
284450	112.44	1.67545	8.977		58.903	16.7881	182.089
284650	112.32	1.67659	8.977		58.8401	16.7995	182.089
284851	112.42	1.67765	8.977		58.8925	16.8101	182.089
285051	112.48	1.67843	8.974		58.9239	16.8179	182.028
285251	112.48	1.67943	8.98		58.9239	16.828	182.15
285452	112.62	1.68048	8.976		58.9973	16.8385	182.069
285652	112.74	1.68134	8.976		59.0601	16.8471	182.069
285854	112.62	1.68248	8.979		58.9973	16.8585	182.13
286055	112.88	1.68329	8.978		59.1335	16.8666	182.11
286255	112.86	1.6844	8.977		59.123	16.8778	182.089
286455	112.92	1.68528	8.977		59.1544	16.8866	182.089
286656	112.9	1.68629	8.98		59.1439	16.8967	182.15
286856	113	1.68725	8.977		59.1963	16.9063	182.089
287057	113.12	1.68821	8.978		59.2592	16.9159	182.11
287257	113.1	1.68922	8.979		59.2487	16.9261	182.13
287457	113.08	1.69022	8.977		59.2382	16.9361	182.089
287658	113.2	1.69108	8.979		59.3011	16.9447	182.13
287858	113.24	1.69207	8.978		59.322	16.9546	182.11
288059	113.38	1.69302	8.978		59.3954	16.9641	182.11
288259	113.38	1.69412	8.977		59.3954	16.9752	182.089
288459	113.36	1.69512	8.977		59.3849	16.9852	182.089
288660	113.4	1.69591	8.977		59.4059	16.9931	182.089
288860	113.56	1.69695	8.975		59.4897	17.0035	182.049
289062	113.56	1.69805	8.979		59.4897	17.0145	182.13
289263	113.52	1.69887	8.973		59.4687	17.0227	182.008
289463	113.66	1.69992	8.977		59.5421	17.0333	182.089
289663	113.6	1.70094	8.978		59.5106	17.0435	182.11
289864	113.74	1.70189	8.98		59.584	17.053	182.15
290064	113.78	1.70298	8.975		59.6049	17.0639	182.049
290265	113.74	1.70399	8.978		59.584	17.074	182.11
290465	113.84	1.70476	8.978		59.6364	17.0818	182.11
290665	114.04	1.70569	8.979		59.7411	17.0911	182.13
290866	113.96	1.70671	8.978		59.6992	17.1013	182.11
291066	114.08	1.70777	8.977		59.7621	17.1119	182.089
291267	113.98	1.70881	8.978		59.7097	17.1223	182.11
291467	114.18	1.70964	8.978		59.8145	17.1307	182.11
291667	114.24	1.71082	8.975		59.8459	17.1425	182.049
291868	114.32	1.71169	8.979		59.8878	17.1512	182.13
292068	114.34	1.71268	8.979		59.8983	17.1611	182.13
292270	114.38	1.71367	8.978		59.9193	17.171	182.11
292471	114.42	1.71465	8.974		59.9402	17.1809	182.028
292671	114.46	1.71554	8.98		59.9612	17.1898	182.15
292871	114.42	1.71655	8.976		59.9402	17.1999	182.069
293072	114.5	1.71753	8.979		59.9821	17.2097	182.13
293272	114.56	1.7186	8.977		60.0135	17.2204	182.089
293473	114.8	1.71972	8.977		60.1393	17.2317	182.089
293673	114.76	1.72103	8.979		60.1183	17.2448	182.13
293873	114.78	1.72203	8.977		60.1288	17.2548	182.089
294074	114.84	1.72311	8.978		60.1602	17.2656	182.11
294274	114.92	1.72408	8.981		60.2021	17.2754	182.17
294475	115	1.72505	8.975		60.244	17.2851	182.049
294675	115.02	1.72604	8.979		60.2545	17.295	182.13
294875	115.04	1.72684	8.977		60.265	17.303	182.089
295076	115.08	1.72792	8.978		60.286	17.3138	182.11
295276	115.14	1.7288	8.978		60.3174	17.3226	182.11
295478	115.2	1.72978	8.976		60.3488	17.3325	182.069
295679	115.24	1.73067	8.977		60.3698	17.3414	182.089
295879	115.38	1.73162	8.977		60.4431	17.3509	182.089
296079	115.4	1.73251	8.975		60.4536	17.3598	182.049
296280	115.44	1.7335	8.978		60.4745	17.3697	182.11
296480	115.48	1.73458	8.979		60.4955	17.3806	182.13
296681	115.52	1.73547	8.977		60.5165	17.3895	182.089
296881	115.56	1.73645	8.976		60.5374	17.3993	182.069
297081	115.56	1.73745	8.981		60.5374	17.4093	182.17
297282	115.62	1.73833	8.974		60.5688	17.4181	182.028
297482	115.7	1.7395	8.978		60.6107	17.4299	182.11
297683	115.7	1.7405	8.975		60.6107	17.4399	182.049
297883	115.66	1.74152	8.978		60.5898	17.4501	182.11
298083	115.76	1.74258	8.976		60.6422	17.4607	182.069
298284	115.88	1.74344	8.977		60.705	17.4693	182.089
298484	115.88	1.74444	8.976		60.705	17.4794	182.069
298686	115.86	1.74535	8.978		60.6946	17.4885	182.11
298887	116	1.7463	8.979		60.7679	17.498	182.13
299087	115.98	1.74741	8.978		60.7574	17.5091	182.11
299287	116.08	1.74827	8.979		60.8098	17.5177	182.13
299488	116.18	1.74944	8.979		60.8622	17.5295	182.13
299688	116.2	1.75023	8.979		60.8727	17.5374	182.13
299889	116.22	1.75122	8.979		60.8832	17.5473	182.13
300089	116.36	1.75227	8.978		60.9565	17.5578	182.11
300289	116.38	1.75327	8.977		60.967	17.5678	182.089
300490	116.4	1.75416	8.978		60.9775	17.5768	182.11
300690	116.44	1.75525	8.977		60.9984	17.5877	182.089
300891	116.48	1.75613	8.977		61.0194	17.5965	182.089
301091	116.56	1.7571	8.98		61.0613	17.6062	182.15
301291	116.54	1.75811	8.979		61.0508	17.6163	182.13
301492	116.68	1.75906	8.979		61.1241	17.6259	182.13
301692	116.74	1.76004	8.977		61.1556	17.6357	182.089
301893	116.6	1.76119	8.978		61.0822	17.6472	182.11
302093	116.78	1.76193	8.981		61.1765	17.6546	182.17
302293	116.78	1.76293	8.978		61.1765	17.6646	182.11
302494	116.8	1.76392	8.975		61.187	17.6745	182.049
302694	116.88	1.76489	8.977		61.2289	17.6843	182.089
302896	116.74	1.76594	8.978		61.1556	17.6948	182.11
303097	116.86	1.7669	8.976		61.2184	17.7044	182.069
303297	116.88	1.76779	8.979		61.2289	17.7133	182.13
303497	116.84	1.76871	8.977		61.2079	17.7225	182.089
303698	117.02	1.76984	8.976		61.3022	17.7339	182.069
303898	117.12	1.77061	8.977		61.3546	17.7416	182.089
304099	117.08	1.77182	8.978		61.3337	17.7537	182.11
304299	117.12	1.77271	8.975		61.3546	17.7626	182.049
304499	117.2	1.77348	8.976		61.3965	17.7703	182.069
304700	117.34	1.77463	8.977		61.4699	17.7819	182.089
304900	117.32	1.77554	8.979		61.4594	17.791	182.13
305101	117.36	1.77652	8.977		61.4804	17.8008	182.089
305301	117.46	1.77759	8.974		61.5327	17.8115	182.028
305501	117.4	1.77861	8.977		61.5013	17.8217	182.089
305702	117.54	1.77956	8.977		61.5747	17.8313	182.089
305902	117.58	1.78035	8.977		61.5956	17.8392	182.089
306104	117.54	1.78146	8.978		61.5747	17.8503	182.11
306305	117.54	1.78246	8.975		61.5747	17.8603	182.049
306505	117.66	1.78352	8.976		61.6375	17.8709	182.069
306705	117.72	1.7846	8.977		61.6689	17.8818	182.089
306906	117.82	1.78566	8.977		61.7213	17.8924	182.089
307106	117.84	1.78676	8.977		61.7318	17.9034	182.089
307307	117.94	1.78782	8.979		61.7842	17.914	182.13
307507	117.96	1.78871	8.978		61.7947	17.9229	182.11
307707	117.88	1.78964	8.979		61.7528	17.9323	182.13
307908	118	1.7907	8.975		61.8156	17.9429	182.049
308108	118.1	1.79167	8.978		61.868	17.9526	182.11
308309	118.12	1.79256	8.977		61.8785	17.9615	182.089
308509	118.14	1.79345	8.975		61.889	17.9704	182.049
308709	118.24	1.79452	8.977		61.9414	17.9812	182.089
308910	118.22	1.79552	8.979		61.9309	17.9912	182.13
309110	118.32	1.79649	8.979		61.9833	18.0009	182.13
309312	118.32	1.79739	8.981		61.9833	18.0099	182.17
309513	118.36	1.79847	8.975		62.0042	18.0207	182.049
309713	118.38	1.79937	8.979		62.0147	18.0298	182.13
309913	118.38	1.80047	8.979		62.0147	18.0408	182.13
310114	118.36	1.80137	8.98		62.0042	18.0498	182.15
310314	118.48	1.80233	8.978		62.0671	18.0594	182.11
310515	118.58	1.8033	8.977		62.1195	18.0691	182.089
310715	118.66	1.80427	8.979		62.1614	18.0789	182.13
310915	118.64	1.80528	8.976		62.1509	18.089	182.069
311116	118.6	1.80629	8.978		62.1299	18.0991	182.11
311316	118.7	1.80716	8.977		62.1823	18.1078	182.089
311517	118.74	1.80814	8.979		62.2033	18.1176	182.13
311717	118.74	1.80924	8.978		62.2033	18.1287	182.11
311917	118.9	1.81018	8.979		62.2871	18.1381	182.13
312118	118.88	1.81129	8.978		62.2766	18.1492	182.11
312318	118.92	1.81238	8.979		62.2976	18.1601	182.13
312520	119.02	1.81324	8.978		62.35	18.1687	182.11
312721	119.12	1.81431	8.977		62.4024	18.1795	182.089
312921	119.2	1.81518	8.974		62.4443	18.1882	182.028
313121	119.18	1.81609	8.976		62.4338	18.1973	182.069
313322	119.3	1.81705	8.979		62.4966	18.2069	182.13
313522	119.34	1.81803	8.979		62.5176	18.2167	182.13
313723	119.4	1.81901	8.979		62.549	18.2266	182.13
313923	119.48	1.81988	8.98		62.5909	18.2353	182.15
314123	119.54	1.82086	8.98		62.6224	18.2451	182.15
314324	119.6	1.82184	8.976		62.6538	18.2549	182.069
314524	119.56	1.82295	8.978		62.6329	18.266	182.11
314725	119.66	1.82382	8.979		62.6852	18.2747	182.13
314925	119.66	1.82492	8.979		62.6852	18.2858	182.13
315125	119.68	1.82571	8.977		62.6957	18.2937	182.089
315326	119.82	1.82676	8.979		62.7691	18.3042	182.13
315526	119.88	1.82764	8.975		62.8005	18.313	182.049
315728	119.9	1.82884	8.977		62.811	18.3251	182.089
315929	120.06	1.82968	8.982		62.8948	18.3335	182.191
316129	119.94	1.83072	8.978		62.8319	18.3439	182.11
316329	120	1.8318	8.979		62.8634	18.3547	182.13
316530	120	1.8327	8.975		62.8634	18.3637	182.049
316730	120.04	1.83379	8.979		62.8843	18.3746	182.13
316931	120.16	1.83474	8.976		62.9472	18.3842	182.069
317131	120.28	1.8356	8.974		63.01	18.3928	182.028
317331	120.26	1.83681	8.977		62.9996	18.4049	182.089
317532	120.32	1.83789	8.977		63.031	18.4157	182.089
317732	120.28	1.839	8.978		63.01	18.4269	182.11
317933	120.32	1.83999	8.977		63.031	18.4368	182.089
318133	120.44	1.84105	8.976		63.0938	18.4474	182.069
318333	120.44	1.84195	8.976		63.0938	18.4564	182.069
318534	120.52	1.84302	8.978		63.1358	18.4671	182.11
318734	120.44	1.84395	8.976		63.0938	18.4765	182.069
318936	120.54	1.84491	8.979		63.1462	18.4861	182.13
319137	120.6	1.84579	8.976		63.1777	18.4949	182.069
319337	120.6	1.84689	8.976		63.1777	18.5059	182.069
319537	120.76	1.84793	8.978		63.2615	18.5163	182.11
319738	120.68	1.84876	8.977		63.2196	18.5246	182.089
319938	120.74	1.84974	8.979		63.251	18.5345	182.13
320139	120.88	1.85079	8.978		63.3243	18.545	182.11
320339	120.74	1.85184	8.977		63.251	18.5555	182.089
320539	120.88	1.85269	8.975		63.3243	18.564	182.049
320740	120.9	1.85359	8.976		63.3348	18.573	182.069
320940	120.98	1.85466	8.978		63.3767	18.5838	182.11
321141	120.94	1.85557	8.976		63.3558	18.5929	182.069
321341	121.04	1.85654	8.977		63.4082	18.6026	182.089
321541	121.08	1.85752	8.978		63.4291	18.6124	182.11
321742	121.08	1.85852	8.979		63.4291	18.6224	182.13
321942	121.16	1.85939	8.979		63.471	18.6312	182.13
322143	121.2	1.86048	8.979		63.492	18.6421	182.13
322343	121.14	1.8614	8.978		63.4606	18.6513	182.11
322543	121.2	1.86248	8.977		63.492	18.6621	182.089
322744	121.24	1.86357	8.979		63.5129	18.673	182.13
322944	121.32	1.86454	8.98		63.5548	18.6828	182.15
323146	121.36	1.86542	8.98		63.5758	18.6916	182.15
323347	121.32	1.86644	8.977		63.5548	18.7018	182.089
323547	121.48	1.86738	8.979		63.6387	18.7112	182.13
323747	121.52	1.86847	8.975		63.6596	18.7221	182.049
323948	121.46	1.86939	8.976		63.6282	18.7314	182.069
324148	121.62	1.87033	8.978		63.712	18.7408	182.11
324349	121.66	1.87132	8.977		63.733	18.7507	182.089
324549	121.64	1.87243	8.978		63.7225	18.7618	182.11
324749	121.68	1.87331	8.976		63.7434	18.7706	182.069
324950	121.76	1.87428	8.976		63.7853	18.7804	182.069
325150	121.8	1.87537	8.975		63.8063	18.7913	182.049
325351	121.8	1.87627	8.981		63.8063	18.8003	182.17
325551	121.86	1.87735	8.978		63.8377	18.8111	182.11
325751	121.88	1.87824	8.974		63.8482	18.82	182.028
325952	121.94	1.87922	8.98		63.8796	18.8299	182.15
326152	121.96	1.88031	8.978		63.8901	18.8408	182.11
326354	122.02	1.88119	8.976		63.9216	18.8496	182.069
326555	121.96	1.88221	8.982		63.8901	18.8598	182.191
326755	122.08	1.88327	8.977		63.953	18.8704	182.089
326955	122.12	1.88406	8.978		63.9739	18.8784	182.11
327156	122.16	1.88514	8.98		63.9949	18.8892	182.15
327356	122.24	1.88612	8.977		64.0368	18.899	182.089
327557	122.32	1.88709	8.977		64.0787	18.9087	182.089
327757	122.42	1.88805	8.977		64.1311	18.9183	182.089
327957	122.42	1.88895	8.976		64.1311	18.9274	182.069
328158	122.44	1.88995	8.98		64.1416	18.9374	182.15
328358	122.52	1.89082	8.979		64.1835	18.9461	182.13
328559	122.52	1.89192	8.977		64.1835	18.9571	182.089
328759	122.58	1.8928	8.977		64.2149	18.9659	182.089
328959	122.64	1.89378	8.976		64.2463	18.9758	182.069
329160	122.62	1.89498	8.975		64.2359	18.9878	182.049
329360	122.72	1.89595	8.977		64.2883	18.9975	182.089
329562	122.68	1.89696	8.977		64.2673	19.0076	182.089
329763	122.84	1.89791	8.979		64.3511	19.0171	182.13
329963	122.98	1.89876	8.977		64.4245	19.0257	182.089
330163	122.82	1.90001	8.979		64.3406	19.0382	182.13
330364	122.88	1.90099	8.975		64.3721	19.048	182.049
330564	122.94	1.90187	8.978		64.4035	19.0568	182.11
330765	122.94	1.90307	8.981		64.4035	19.0688	182.17
330965	123.02	1.90384	8.981		64.4454	19.0766	182.17
331165	123.06	1.90473	8.976		64.4664	19.0855	182.069
331366	123.02	1.90584	8.978		64.4454	19.0966	182.11
331566	123.12	1.90671	8.977		64.4978	19.1053	182.089
331767	123.06	1.90753	8.979		64.4664	19.1135	182.13
331967	123.2	1.90818	8.979		64.5397	19.12	182.13
332167	122.48	1.91143	8.977		64.1625	19.1526	182.089
332368	122.94	1.91027	8.981		64.4035	19.141	182.17
332568	122.94	1.91027	8.981		64.4035	19.141	182.17
332770	122.44	1.91455	8.977		64.1416	19.1839	182.089
332971	122.44	1.91455	8.977		64.1416	19.1839	182.089
333171	121.64	1.91483	8.979		63.7225	19.1867	182.13
333371	121.64	1.91483	8.979		63.7225	19.1867	182.13
333572	121.64	1.91483	8.979		63.7225	19.1867	182.13
333772	121.7	1.918	8.977		63.7539	19.2184	182.089
333973	122.2	1.92023	8.978		64.0158	19.2408	182.11
334173	121.86	1.91995	8.978		63.8377	19.238	182.11
334373	121.92	1.92233	8.974		63.8692	19.2618	182.028
334574	121.92	1.92233	8.974		63.8692	19.2618	182.028
334774	121.92	1.92233	8.974		63.8692	19.2618	182.028
334975	121.92	1.92233	8.974		63.8692	19.2618	182.028
335175	121.92	1.92233	8.974		63.8692	19.2618	182.028
335375	121.92	1.92233	8.974		63.8692	19.2618	182.028
335576	121.9	1.92693	8.979		63.8587	19.3079	182.13
335776	122.18	1.92924	8.976		64.0054	19.3311	182.069
335978	122.18	1.92924	8.976		64.0054	19.3311	182.069
336179	122.18	1.92924	8.976		64.0054	19.3311	182.069
336379	122.18	1.92924	8.976		64.0054	19.3311	182.069
336579	121.74	1.93209	8.979		63.7749	19.3596	182.13
336780	121.74	1.93209	8.979		63.7749	19.3596	182.13
336980	122.36	1.93377	8.979		64.0997	19.3765	182.13
337181	122.44	1.93625	8.977		64.1416	19.4013	182.089
337381	123.22	1.93547	8.979		64.5502	19.3935	182.13
337581	122.88	1.93779	8.978		64.3721	19.4167	182.11
337782	123.26	1.93766	8.978		64.5711	19.4154	182.11
337982	123.38	1.93982	8.977		64.634	19.4371	182.089
338183	123.38	1.93982	8.977		64.634	19.4371	182.089
338383	123.8	1.94207	8.977		64.854	19.4596	182.089
338583	123.8	1.94207	8.977		64.854	19.4596	182.089
338784	123.2	1.94398	8.979		64.5397	19.4788	182.13
338984	122.7	1.94366	8.979		64.2778	19.4756	182.13
339186	122.72	1.94605	8.977		64.2883	19.4995	182.089
339387	122.72	1.94605	8.977		64.2883	19.4995	182.089
339587	122.42	1.94795	8.976		64.1311	19.5185	182.069
339787	122.42	1.94795	8.976		64.1311	19.5185	182.069
339988	122.2	1.94953	8.979		64.0158	19.5344	182.13
340188	122.2	1.94953	8.979		64.0158	19.5344	182.13
340389	122.22	1.95132	8.976		64.0263	19.5523	182.069
340589	122.22	1.95132	8.976		64.0263	19.5523	182.069
340789	122.62	1.95328	8.975		64.2359	19.5719	182.049
340990	122.62	1.95328	8.975		64.2359	19.5719	182.049
341190	122.56	1.9554	8.978		64.2044	19.5932	182.11
341391	122.56	1.9554	8.978		64.2044	19.5932	182.11
341591	122.88	1.95739	8.975		64.3721	19.6131	182.049
341791	122.88	1.95739	8.975		64.3721	19.6131	182.049
341992	122.54	1.95951	8.981		64.194	19.6344	182.17
342192	122.54	1.95951	8.981		64.194	19.6344	182.17
342393	122.56	1.9611	8.981		64.2044	19.6503	182.17
342593	122.56	1.9611	8.981		64.2044	19.6503	182.17
342793	123.16	1.96289	8.978		64.5188	19.6682	182.11
342994	123.16	1.96289	8.978		64.5188	19.6682	182.11
343194	123.14	1.9649	8.977		64.5083	19.6884	182.089
343396	123.14	1.9649	8.977		64.5083	19.6884	182.089
343597	123.2	1.96678	8.975		64.5397	19.7072	182.049
343797	123.2	1.96678	8.975		64.5397	19.7072	182.049
343997	122.92	1.96898	8.978		64.393	19.7293	182.11
344198	122.92	1.96898	8.978		64.393	19.7293	182.11
344398	123.16	1.97109	8.977		64.5188	19.7504	182.089
344599	123.16	1.97109	8.977		64.5188	19.7504	182.089
344799	124.56	1.9728	8.979		65.2522	19.7675	182.13
344999	124.56	1.9728	8.979		65.2522	19.7675	182.13
345200	124.12	1.97516	8.979		65.0217	19.7912	182.13
345400	124.12	1.97516	8.979		65.0217	19.7912	182.13
345601	124.42	1.97595	8.98		65.1788	19.7991	182.15
345801	124.42	1.97595	8.98		65.1788	19.7991	182.15
346001	124.42	1.97595	8.98		65.1788	19.7991	182.15
346202	124.64	1.97918	8.98		65.2941	19.8315	182.15
346402	124.64	1.97918	8.98		65.2941	19.8315	182.15
346604	125.04	1.98134	8.979		65.5036	19.8531	182.13
346805	125.04	1.98134	8.979		65.5036	19.8531	182.13
347005	125.14	1.9832	8.98		65.556	19.8717	182.15
347205	125.14	1.9832	8.98		65.556	19.8717	182.15
347406	125.28	1.98575	8.978		65.6293	19.8973	182.11
347606	125.28	1.98575	8.978		65.6293	19.8973	182.11
347807	125.34	1.98733	8.98		65.6608	19.9131	182.15
348007	125.34	1.98733	8.98		65.6608	19.9131	182.15
348207	125.5	1.98937	8.98		65.7446	19.9336	182.15
348408	125.5	1.98937	8.98		65.7446	19.9336	182.15
348608	125.54	1.99206	8.979		65.7655	19.9605	182.13
348809	125.54	1.99206	8.979		65.7655	19.9605	182.13
349009	125.48	1.99418	8.977		65.7341	19.9818	182.089
349209	125.48	1.99418	8.977		65.7341	19.9818	182.089
349410	125.58	1.99625	8.98		65.7865	20.0025	182.15
349610	125.58	1.99625	8.98		65.7865	20.0025	182.15
349812	125.52	1.99837	8.977		65.7551	20.0237	182.089
350013	125.52	1.99837	8.977		65.7551	20.0237	182.089
350213	125.34	2.00073	8.976		65.6608	20.0474	182.069
350413	125.34	2.00073	8.976		65.6608	20.0474	182.069
350614	125.02	2.00244	8.974		65.4931	20.0645	182.028
350814	125.02	2.00244	8.974		65.4931	20.0645	182.028
351015	125.24	2.00447	8.977		65.6084	20.0849	182.089
351215	125.24	2.00447	8.977		65.6084	20.0849	182.089
351415	124.94	2.00657	8.978		65.4512	20.1059	182.11
351616	124.94	2.00617	8.978		65.4512	20.1019	182.11
351816	124.56	2.0081	8.976		65.2522	20.1212	182.069
352017	124.56	2.0081	8.976		65.2522	20.1212	182.069
352217	124.18	2.01044	8.979		65.0531	20.1447	182.13
352417	124.18	2.01044	8.979		65.0531	20.1447	182.13
352618	124.3	2.0123	8.976		65.116	20.1633	182.069
352818	124.3	2.0123	8.976		65.116	20.1633	182.069
353020	124.52	2.01422	8.977		65.2312	20.1826	182.089
353221	124.52	2.01422	8.977		65.2312	20.1826	182.089
353421	124.74	2.01634	8.974		65.3465	20.2038	182.028
353621	125.1	2.01611	8.981		65.535	20.2015	182.17
353822	125.02	2.01824	8.974		65.4931	20.2228	182.028
354022	125.16	2.01789	8.977		65.5665	20.2193	182.089
354223	125.14	2.0202	8.977		65.556	20.2425	182.089
354423	125.08	2.02002	8.979		65.5246	20.2407	182.13
354623	125.52	2.02227	8.979		65.7551	20.2632	182.13
354824	125.52	2.02227	8.979		65.7551	20.2632	182.13
355024	125.52	2.02227	8.979		65.7551	20.2632	182.13
355225	125.52	2.02227	8.979		65.7551	20.2632	182.13
355425	125.52	2.02227	8.979		65.7551	20.2632	182.13
355625	125.52	2.02227	8.979		65.7551	20.2632	182.13
355826	125.52	2.02227	8.979		65.7551	20.2632	182.13
356026	125.52	2.02227	8.979		65.7551	20.2632	182.13
356228	125.52	2.02227	8.979		65.7551	20.2632	182.13
356429	125.52	2.02227	8.979		65.7551	20.2632	182.13
356629	125.52	2.02227	8.979		65.7551	20.2632	182.13
356829	125.52	2.02227	8.979		65.7551	20.2632	182.13
357030	125.52	2.02227	8.979		65.7551	20.2632	182.13
357230	125.52	2.02227	8.979		65.7551	20.2632	182.13
357431	125.52	2.02227	8.979		65.7551	20.2632	182.13
357631	125.68	2.03681	8.978		65.8389	20.4089	182.11
357831	125.68	2.03681	8.978		65.8389	20.4089	182.11
358032	125.72	2.039	8.979		65.8598	20.4309	182.13
358232	126.32	2.03859	8.976		66.1742	20.4268	182.069
358433	125.94	2.04072	8.976		65.9751	20.4481	182.069
358633	125.94	2.04072	8.976		65.9751	20.4481	182.069
358833	125.64	2.04293	8.979		65.8179	20.4702	182.13
359034	125.64	2.04293	8.979		65.8179	20.4702	182.13
359234	126.26	2.04471	8.974		66.1427	20.4881	182.028
359436	126.58	2.0446	8.979		66.3104	20.487	182.13
359637	127.3	2.04665	8.977		66.6875	20.5075	182.089
359837	127.26	2.04706	8.975		66.6666	20.5116	182.049
360037	127.38	2.04782	8.979		66.7294	20.5192	182.13
360238	127.36	2.04872	8.978		66.719	20.5283	182.11
360438	127.42	2.0499	8.978		66.7504	20.5401	182.11
360639	127.44	2.0514	8.976		66.7609	20.5551	182.069
360839	127.42	2.0521	8.977		66.7504	20.5621	182.089
361039	127.46	2.05309	8.98		66.7714	20.572	182.15
361240	125.32	2.05374	8.99		65.6503	20.5786	182.353
361408	115.28	2.06075	8.975		60.3907	20.6488	182.049
361608	108.76	2.06773	8.975		56.9752	20.7187	182.049
361809	109.16	2.06499	8.979		57.1847	20.6913	182.13
362009	109.16	2.06499	8.979		57.1847	20.6913	182.13
362209	106.8	2.06572	8.981		55.9484	20.6986	182.17
362410	106.5	2.06752	8.979		55.7912	20.7166	182.13
362610	106.5	2.06752	8.979		55.7912	20.7166	182.13
362812	107.36	2.06872	8.975		56.2417	20.7287	182.049
363013	107.44	2.0703	8.977		56.2837	20.7445	182.089
363213	107.44	2.0703	8.977		56.2837	20.7445	182.089
363413	107.44	2.0703	8.977		56.2837	20.7445	182.089
363614	107.44	2.0703	8.977		56.2837	20.7445	182.089
363814	107.32	2.07374	8.977		56.2208	20.779	182.089
364015	107.9	2.07554	8.975		56.5246	20.797	182.049
364215	108.24	2.07532	8.979		56.7027	20.7948	182.13
364415	108.24	2.07532	8.979		56.7027	20.7948	182.13
364616	108.24	2.07532	8.979		56.7027	20.7948	182.13
364816	108.24	2.07532	8.979		56.7027	20.7948	182.13
365017	108.24	2.07532	8.979		56.7027	20.7948	182.13
365217	107.96	2.08061	8.976		56.5561	20.8478	182.069
365417	108.64	2.08228	8.979		56.9123	20.8645	182.13
365618	108.92	2.08208	8.977		57.059	20.8625	182.089
365818	108.92	2.08208	8.977		57.059	20.8625	182.089
366020	109.24	2.08387	8.98		57.2266	20.8805	182.15
366221	109.24	2.08387	8.98		57.2266	20.8805	182.15
366421	109.24	2.08387	8.98		57.2266	20.8805	182.15
366621	109.24	2.08387	8.98		57.2266	20.8805	182.15
366822	108.76	2.08913	8.978		56.9752	20.9332	182.11
367022	108.76	2.08913	8.978		56.9752	20.9332	182.11
367223	109.1	2.09082	8.976		57.1533	20.9501	182.069
367423	109.1	2.09082	8.976		57.1533	20.9501	182.069
367623	109.1	2.09082	8.976		57.1533	20.9501	182.069
367824	109.1	2.09082	8.976		57.1533	20.9501	182.069
368024	109.1	2.09082	8.976		57.1533	20.9501	182.069
368225	109.1	2.09082	8.976		57.1533	20.9501	182.069
368425	108.96	2.09616	8.979		57.0799	21.0036	182.13
368625	109.44	2.098	8.976		57.3314	21.022	182.069
368826	109.44	2.098	8.976		57.3314	21.022	182.069
369026	109.12	2.09971	8.976		57.1637	21.0392	182.069
369228	109.12	2.09971	8.976		57.1637	21.0392	182.069
369429	108.76	2.10153	8.977		56.9752	21.0574	182.089
369629	108.76	2.10153	8.977		56.9752	21.0574	182.089
369829	109.18	2.10329	8.978		57.1952	21.0751	182.11
370030	109.18	2.10329	8.978		57.1952	21.0751	182.11
370230	110.34	2.10458	8.977		57.8029	21.088	182.089
370431	110.32	2.10679	8.977		57.7924	21.1101	182.089
370631	110.62	2.10648	8.978		57.9495	21.107	182.11
370831	110.92	2.10848	8.977		58.1067	21.1271	182.089
371032	110.46	2.10844	8.978		57.8657	21.1267	182.11
371232	110.1	2.11057	8.974		57.6771	21.148	182.028
371433	110.1	2.11057	8.974		57.6771	21.148	182.028
371633	109.86	2.11225	8.975		57.5514	21.1648	182.049
371833	109.86	2.11225	8.975		57.5514	21.1648	182.049
372034	110.34	2.11408	8.977		57.8029	21.1832	182.089
372234	110.34	2.11408	8.977		57.8029	21.1832	182.089
372436	110.32	2.11619	8.978		57.7924	21.2043	182.11
372637	110.32	2.11619	8.978		57.7924	21.2043	182.11
372837	110.48	2.11803	8.978		57.8762	21.2227	182.11
373037	110.48	2.11803	8.978		57.8762	21.2227	182.11
373238	110.78	2.11993	8.979		58.0333	21.2418	182.13
373438	110.78	2.11993	8.979		58.0333	21.2418	182.13
373639	110.6	2.12159	8.979		57.9391	21.2584	182.13
373839	110.6	2.12159	8.979		57.9391	21.2584	182.13
374039	111.14	2.1233	8.977		58.2219	21.2756	182.089
374240	111.14	2.1233	8.977		58.2219	21.2756	182.089
374440	111.36	2.12512	8.98		58.3372	21.2938	182.15
374641	111.48	2.12708	8.978		58.4001	21.3134	182.11
374841	111.48	2.12708	8.978		58.4001	21.3134	182.11
375041	111.18	2.12909	8.978		58.2429	21.3336	182.11
375242	111.18	2.12909	8.978		58.2429	21.3336	182.11
375442	111.26	2.13096	8.978		58.2848	21.3523	182.11
375643	111.26	2.13096	8.978		58.2848	21.3523	182.11
375843	111.4	2.13291	8.977		58.3581	21.3718	182.089
376043	111.4	2.13291	8.977		58.3581	21.3718	182.089
376244	111.76	2.13468	8.974		58.5467	21.3896	182.028
376444	111.76	2.13468	8.974		58.5467	21.3896	182.028
376646	111.9	2.13664	8.979		58.6201	21.4092	182.13
376847	111.9	2.13664	8.979		58.6201	21.4092	182.13
377047	112	2.1387	8.978		58.6725	21.4299	182.11
377247	112	2.1387	8.978		58.6725	21.4299	182.11
377448	111.84	2.14076	8.979		58.5886	21.4505	182.13
377648	111.84	2.14076	8.979		58.5886	21.4505	182.13
377849	112.4	2.14256	8.977		58.882	21.4685	182.089
378049	112.4	2.14256	8.977		58.882	21.4685	182.089
378249	112.48	2.14453	8.977		58.9239	21.4883	182.089
378450	112.48	2.14453	8.977		58.9239	21.4883	182.089
378650	112.92	2.14628	8.976		59.1544	21.5058	182.069
378851	112.92	2.14628	8.976		59.1544	21.5058	182.069
379051	112.92	2.14628	8.976		59.1544	21.5058	182.069
379251	112.92	2.14628	8.976		59.1544	21.5058	182.069
379452	112.92	2.14628	8.976		59.1544	21.5058	182.069
379652	112.92	2.14628	8.976		59.1544	21.5058	182.069
379854	113.24	2.15177	8.977		59.322	21.5608	182.089
380055	113.24	2.15177	8.977		59.322	21.5608	182.089
380255	114.04	2.15369	8.977		59.7411	21.5801	182.089
380455	114.04	2.15369	8.977		59.7411	21.5801	182.089
380656	114.04	2.15369	8.977		59.7411	21.5801	182.089
380856	114.04	2.15369	8.977		59.7411	21.5801	182.089
381057	114.04	2.15369	8.977		59.7411	21.5801	182.089
381257	114.62	2.15938	8.978		60.045	21.6371	182.11
381457	114.12	2.15916	8.975		59.783	21.6349	182.049
381658	114.3	2.16129	8.974		59.8773	21.6562	182.028
381858	114.72	2.16105	8.976		60.0974	21.6538	182.069
382059	114.26	2.16311	8.979		59.8564	21.6744	182.13
382259	114.26	2.16311	8.979		59.8564	21.6744	182.13
382459	113.98	2.16511	8.974		59.7097	21.6945	182.028
382660	113.98	2.16511	8.974		59.7097	21.6945	182.028
382860	109.44	2.168	8.979		57.3314	21.7234	182.13
383062	108.6	2.16939	8.978		56.8913	21.7374	182.11
383263	108.6	2.16939	8.978		56.8913	21.7374	182.11
383463	109.3	2.17215	8.974		57.258	21.765	182.028
383663	109.32	2.17204	8.978		57.2685	21.7639	182.11
383864	109.32	2.17204	8.978		57.2685	21.7639	182.11
384064	109.32	2.17204	8.978		57.2685	21.7639	182.11
384265	109.32	2.17204	8.978		57.2685	21.7639	182.11
384465	109.26	2.17706	8.977		57.2371	21.8142	182.089
384665	109.26	2.17706	8.977		57.2371	21.8142	182.089
384866	109.44	2.1785	8.976		57.3314	21.8287	182.069
385066	109.44	2.1785	8.976		57.3314	21.8287	182.069
385267	109.1	2.18042	8.976		57.1533	21.8479	182.069
385467	109.98	2.18181	8.977		57.6143	21.8618	182.089
385667	109.88	2.18204	8.979		57.5619	21.8641	182.13
385868	110.36	2.18347	8.977		57.8133	21.8785	182.089
386068	110.7	2.18436	8.979		57.9914	21.8874	182.13
386270	110.5	2.18512	8.98		57.8867	21.895	182.15
386471	110.8	2.18602	8.978		58.0438	21.904	182.11
386671	110.9	2.18748	8.979		58.0962	21.9186	182.13
386871	110.92	2.18798	8.981		58.1067	21.9236	182.17
387072	111.04	2.18924	8.981		58.1696	21.9363	182.17
387272	111.04	2.18994	8.978		58.1696	21.9433	182.11
387473	111.3	2.19085	8.98		58.3058	21.9524	182.15
387673	111.32	2.19214	8.978		58.3162	21.9653	182.11
387873	111.3	2.19315	8.974		58.3058	21.9755	182.028
388074	111.56	2.19395	8.979		58.442	21.9835	182.13
388274	111.56	2.19485	8.979		58.442	21.9925	182.13
388475	111.66	2.19582	8.977		58.4943	22.0022	182.089
388675	111.76	2.19668	8.98		58.5467	22.0108	182.15
388875	111.86	2.19775	8.98		58.5991	22.0215	182.15
389076	111.92	2.19873	8.977		58.6306	22.0314	182.089
389276	111.94	2.19982	8.977		58.641	22.0423	182.089
389478	112.14	2.20085	8.978		58.7458	22.0526	182.11
389679	112.28	2.2017	8.977		58.8191	22.0611	182.089
389879	112.36	2.20267	8.978		58.8611	22.0708	182.11
390079	112.4	2.20366	8.978		58.882	22.0808	182.11
390280	112.5	2.20452	8.978		58.9344	22.0894	182.11
390480	112.54	2.20551	8.977		58.9553	22.0993	182.089
390681	112.62	2.20658	8.976		58.9973	22.11	182.069
390881	112.8	2.20752	8.976		59.0915	22.1194	182.069
391081	112.76	2.20833	8.981		59.0706	22.1276	182.17
391282	112.86	2.2094	8.978		59.123	22.1383	182.11

## Sheet: ZC-8-12
Time: 11:04:27,06/22/2019
diameter: 49.3	mm	height: 99.9	mm
Vertical 100kN force sensor (vertical force of test piece)
Control mode: force / confining pressure	waveform: slope
KN/s	Force end point: 23.720	KN	confining pressure rate: 0.500	MPa/s	confining pressure end point: 12.0040	MPa
time (ms)	vertical force (KN)	vertical deformation (mm)	confining pressure (MPa)		Stress (MPa)	axial strain	transverse strain
0	0	0	0		0	0	0
200	0	0	0		0	0	0
400	0	0	0		0	0	0
601	0.38	-0.00013	0.007		0.199067	-0.0013013	0.141988
801	0.56	-0.0002	0.014		0.293362	-0.002002	0.283976
1003	0.6	-0.00031	0.022		0.314317	-0.0031031	0.446247
1204	0.76	-0.00027	0.04		0.398135	-0.0027027	0.811359
1404	1.06	-0.00037	0.056		0.555293	-0.0037037	1.1359
1604	1.32	-0.00056	0.087		0.691497	-0.00560561	1.76471
1805	1.36	-0.00048	0.127		0.712451	-0.0048048	2.57606
2005	1.46	-0.00051	0.177		0.764837	-0.00510511	3.59026
2206	1.7	-0.00059	0.228		0.890564	-0.00590591	4.62475
2406	1.88	-0.00046	0.27		0.984859	-0.0046046	5.47667
2606	2.12	-0.00034	0.316		1.11059	-0.0034034	6.40974
2807	2.28	-0.0001	0.357		1.1944	-0.001001	7.24138
3007	2.52	0.00692	0.395		1.32013	0.0692693	8.01217
3208	2.7	0.01126	0.421		1.41443	0.112713	8.53955
3408	3.06	0.01593	0.446		1.60302	0.159459	9.04665
3608	3.22	0.02077	0.469		1.68683	0.207908	9.51318
3809	3.52	0.02527	0.496		1.84399	0.252953	10.0609
4009	3.76	0.02958	0.527		1.96972	0.296096	10.6897
4211	3.9	0.03184	0.579		2.04306	0.318719	11.7444
4412	4	0.0326	0.676		2.09545	0.326326	13.712
4612	4.26	0.03321	0.873		2.23165	0.332432	17.7079
4813	4.56	0.0334	1.362		2.38881	0.334334	27.6268
5013	4.72	0.03325	2.04		2.47263	0.332833	41.3793
5213	4.96	0.03316	2.292		2.59835	0.331932	46.4909
5414	5.14	0.033	2.564		2.69265	0.33033	52.0081
5614	5.3	0.03305	2.821		2.77646	0.330831	57.2211
5814	5.46	0.03299	2.876		2.86028	0.33023	58.3367
6015	5.68	0.03311	2.971		2.97553	0.331431	60.2637
6215	5.84	0.03406	3.075		3.05935	0.340941	62.3732
6416	5.96	0.03641	3.173		3.12221	0.364464	64.3611
6616	6.34	0.03798	3.273		3.32128	0.38018	66.3895
6816	6.42	0.03985	3.372		3.36319	0.398899	68.3976
7017	6.7	0.04176	3.473		3.50987	0.418018	70.4462
7217	6.82	0.04361	3.572		3.57273	0.436537	72.4544
7419	6.94	0.04577	3.673		3.6356	0.458158	74.503
7620	7.22	0.04797	3.775		3.78228	0.48018	76.572
7820	7.38	0.05022	3.873		3.8661	0.502703	78.5598
8021	7.56	0.05235	3.971		3.96039	0.524024	80.5477
8221	7.7	0.05471	4.074		4.03373	0.547648	82.6369
8421	7.92	0.05693	4.174		4.14898	0.56987	84.6653
8622	8.18	0.05934	4.276		4.28519	0.593994	86.7343
8822	8.44	0.06175	4.374		4.42139	0.618118	88.7221
9022	8.64	0.06418	4.472		4.52616	0.642442	90.7099
9223	8.98	0.06636	4.575		4.70427	0.664264	92.7992
9423	9.14	0.0687	4.674		4.78809	0.687688	94.8073
9624	9.42	0.0708	4.773		4.93477	0.708709	96.8154
9824	9.66	0.07312	4.876		5.0605	0.731932	98.9047
10024	9.86	0.07515	4.977		5.16527	0.752252	100.953
10225	10	0.0765	5.077		5.23861	0.765766	102.982
10425	10.06	0.07738	5.174		5.27004	0.774575	104.949
10627	10.16	0.07844	5.275		5.32243	0.785185	106.998
10828	10.38	0.07977	5.376		5.43768	0.798498	109.047
11028	10.68	0.08296	5.475		5.59484	0.83043	111.055
11229	10.98	0.08596	5.576		5.752	0.86046	113.103
11429	11.28	0.08865	5.677		5.90915	0.887387	115.152
11629	11.24	0.09007	5.776		5.8882	0.901602	117.16
11830	11.42	0.0908	5.877		5.9825	0.908909	119.209
12030	11.58	0.09185	5.979		6.06631	0.919419	121.278
12230	11.72	0.0929	6.073		6.13965	0.92993	123.185
12431	12	0.0948	6.179		6.28634	0.948949	125.335
12631	12.24	0.09642	6.279		6.41206	0.965165	127.363
12832	12.36	0.09827	6.378		6.47493	0.983684	129.371
13032	12.66	0.10007	6.479		6.63208	1.0017	131.42
13232	12.82	0.10211	6.578		6.7159	1.02212	133.428
13433	13.08	0.10422	6.676		6.85211	1.04324	135.416
13633	13.28	0.10635	6.78		6.95688	1.06456	137.525
13835	13.42	0.1083	6.877		7.03022	1.08408	139.493
14036	13.68	0.11031	6.98		7.16642	1.1042	141.582
14236	13.9	0.11244	7.081		7.28167	1.12553	143.631
14437	14.12	0.11426	7.178		7.39692	1.14374	145.598
14637	14.34	0.11628	7.283		7.51217	1.16396	147.728
14837	14.58	0.1182	7.378		7.6379	1.18318	149.655
15038	14.86	0.1199	7.474		7.78458	1.2002	151.602
15238	15.02	0.12144	7.587		7.8684	1.21562	153.895
15438	15.2	0.12328	7.681		7.96269	1.23403	155.801
15639	15.38	0.12502	7.78		8.05699	1.25145	157.809
15839	15.5	0.12678	7.882		8.11985	1.26907	159.878
16040	15.7	0.12881	7.983		8.22462	1.28939	161.927
16240	15.96	0.13061	8.081		8.36083	1.30741	163.915
16440	16.22	0.13232	8.179		8.49703	1.32452	165.903
16641	16.42	0.13405	8.282		8.6018	1.34184	167.992
16841	16.58	0.1358	8.384		8.68562	1.35936	170.061
17043	16.6	0.13739	8.482		8.6961	1.37528	172.049
17244	16.88	0.13919	8.584		8.84278	1.39329	174.118
17444	17.08	0.14082	8.683		8.94755	1.40961	176.126
17645	17.22	0.14237	8.783		9.02089	1.42513	178.154
17845	17.46	0.14399	8.885		9.14662	1.44134	180.223
18045	17.7	0.14561	8.985		9.27234	1.45756	182.252
18246	17.94	0.14732	9.083		9.39807	1.47467	184.239
18446	18.06	0.14898	9.181		9.46093	1.49129	186.227
18646	18.22	0.15062	9.284		9.54475	1.50771	188.316
18847	18.52	0.15212	9.383		9.70191	1.52272	190.325
19047	18.62	0.15358	9.481		9.7543	1.53734	192.312
19248	18.86	0.155	9.584		9.88002	1.55155	194.402
19448	19.12	0.15621	9.683		10.0162	1.56366	196.41
19648	19.24	0.15767	9.785		10.0791	1.57828	198.479
19849	19.32	0.15914	9.886		10.121	1.59299	200.527
20049	19.5	0.16068	9.987		10.2153	1.60841	202.576
20250	19.82	0.16226	10.089		10.3829	1.62422	204.645
20450	20.02	0.16459	10.186		10.4877	1.64755	206.613
20650	20.24	0.16722	10.288		10.603	1.67387	208.682
20851	20.56	0.1695	10.387		10.7706	1.6967	210.69
21051	20.8	0.17162	10.485		10.8963	1.71792	212.677
21253	21.12	0.17351	10.588		11.0639	1.73684	214.767
21454	21.16	0.17489	10.687		11.0849	1.75065	216.775
21654	21.3	0.17475	10.791		11.1582	1.74925	218.884
21854	21.42	0.1748	10.888		11.2211	1.74975	220.852
22055	21.68	0.17461	10.987		11.3573	1.74785	222.86
22255	21.78	0.17468	11.089		11.4097	1.74855	224.929
22456	21.98	0.17461	11.19		11.5145	1.74785	226.978
22656	22.28	0.1789	11.29		11.6716	1.79079	229.006
22856	22.64	0.18218	11.39		11.8602	1.82362	231.034
23057	22.8	0.18432	11.49		11.944	1.84505	233.063
23257	22.82	0.18471	11.589		11.9545	1.84895	235.071
23458	23.02	0.18504	11.689		12.0593	1.85225	237.099
23658	23.18	0.18589	11.79		12.1431	1.86076	239.148
23858	23.46	0.18709	11.892		12.2898	1.87277	241.217
24059	23.68	0.18941	11.988		12.405	1.896	243.164
24259	23.72	0.1916	12.004		12.426	1.91792	243.489
控制模式:围压	波形:斜坡
MPa/s	终点:12.0030	MPa
时间(ms)	垂直力(KN)	垂直变形(mm)	围压(MPa)
24360	23.92	0.19253	12.003		12.5308	1.92723	243.469
控制模式:位移	波形:斜坡
mm/s	终点:2.1429	mm
时间(ms)	垂直力(KN)	垂直变形(mm)	围压(MPa)
24394	23.88	0.19274	11.992		12.5098	1.92933	243.245
24594	20.4	0.19436	11.974		10.6868	1.94555	242.88
24794	20.6	0.19429	11.978		10.7915	1.94484	242.961
24994	20.6	0.19429	11.978		10.7915	1.94484	242.961
25194	19.42	0.1985	11.976		10.1734	1.98699	242.921
25394	19.42	0.1985	11.976		10.1734	1.98699	242.921
25594	21.34	0.19753	11.979		11.1792	1.97728	242.982
25794	21.34	0.19753	11.979		11.1792	1.97728	242.982
25994	20.54	0.20271	11.971		10.7601	2.02913	242.819
26194	20.54	0.20271	11.971		10.7601	2.02913	242.819
26394	20.06	0.20238	11.979		10.5087	2.02583	242.982
26594	22.7	0.20156	11.978		11.8917	2.01762	242.961
26794	22.7	0.20156	11.978		11.8917	2.01762	242.961
26994	18.98	0.20766	11.977		9.94289	2.07868	242.941
27194	19.18	0.20689	11.978		10.0477	2.07097	242.961
27394	22.34	0.20578	11.978		11.7031	2.05986	242.961
27594	22.34	0.20578	11.978		11.7031	2.05986	242.961
27794	20.34	0.21158	11.977		10.6553	2.11792	242.941
27994	20.34	0.21158	11.977		10.6553	2.11792	242.941
28194	21.68	0.21071	11.978		11.3573	2.10921	242.961
28394	21.68	0.21071	11.978		11.3573	2.10921	242.961
28594	22.04	0.21589	11.972		11.5459	2.16106	242.84
28794	22.04	0.21589	11.972		11.5459	2.16106	242.84
28994	22.04	0.21589	11.972		11.5459	2.16106	242.84
29194	23.54	0.21426	11.977		12.3317	2.14474	242.941
29394	23.54	0.21426	11.977		12.3317	2.14474	242.941
29594	20.76	0.21993	11.98		10.8754	2.2015	243.002
29794	20.76	0.21993	11.98		10.8754	2.2015	243.002
29994	23.34	0.21873	11.979		12.2269	2.18949	242.982
30194	23.34	0.21873	11.979		12.2269	2.18949	242.982
30394	21.24	0.22477	11.974		11.1268	2.24995	242.88
30594	21.24	0.22477	11.974		11.1268	2.24995	242.88
30794	22.98	0.22286	11.976		12.0383	2.23083	242.921
30994	22.98	0.22286	11.976		12.0383	2.23083	242.921
31194	23.1	0.22782	11.972		12.1012	2.28048	242.84
31394	23.1	0.22782	11.972		12.1012	2.28048	242.84
31594	23.1	0.22782	11.972		12.1012	2.28048	242.84
31794	24.96	0.22686	11.98		13.0756	2.27087	243.002
31994	24.96	0.22686	11.98		13.0756	2.27087	243.002
32194	24.96	0.22686	11.98		13.0756	2.27087	243.002
32394	24.96	0.22686	11.98		13.0756	2.27087	243.002
32594	24.58	0.2309	11.976		12.8765	2.31131	242.921
32794	24.58	0.2309	11.976		12.8765	2.31131	242.921
32994	22.24	0.23642	11.98		11.6507	2.36657	243.002
33194	22.24	0.23642	11.98		11.6507	2.36657	243.002
33394	24.74	0.23534	11.98		12.9603	2.35576	243.002
33594	24.74	0.23534	11.98		12.9603	2.35576	243.002
33794	22.26	0.24091	11.978		11.6612	2.41151	242.961
33994	22.26	0.24091	11.978		11.6612	2.41151	242.961
34194	24.22	0.23942	11.979		12.6879	2.3966	242.982
34394	24.22	0.23942	11.979		12.6879	2.3966	242.982
34594	24	0.2446	11.972		12.5727	2.44845	242.84
34794	24	0.2446	11.972		12.5727	2.44845	242.84
34994	24	0.2446	11.972		12.5727	2.44845	242.84
35194	26.04	0.24339	11.979		13.6413	2.43634	242.982
35394	26.04	0.24339	11.979		13.6413	2.43634	242.982
35594	22.22	0.24962	11.98		11.6402	2.4987	243.002
35794	22.1	0.24897	11.977		11.5773	2.49219	242.941
35994	25.46	0.24779	11.976		13.3375	2.48038	242.921
36194	25.46	0.24779	11.976		13.3375	2.48038	242.921
36394	23.94	0.25332	11.974		12.5412	2.53574	242.88
36594	23.94	0.25332	11.974		12.5412	2.53574	242.88
36794	24.52	0.25262	11.981		12.8451	2.52873	243.022
36994	27.04	0.25194	11.978		14.1652	2.52192	242.961
37194	27.04	0.25194	11.978		14.1652	2.52192	242.961
37394	27.04	0.25194	11.978		14.1652	2.52192	242.961
37594	27.04	0.25194	11.978		14.1652	2.52192	242.961
37794	26.76	0.25603	11.98		14.0185	2.56286	243.002
37994	26.76	0.25603	11.98		14.0185	2.56286	243.002
38194	24.16	0.26144	11.976		12.6565	2.61702	242.921
38394	23.92	0.26143	11.978		12.5308	2.61692	242.961
38594	27.36	0.26032	11.979		14.3328	2.60581	242.982
38794	27.36	0.26032	11.979		14.3328	2.60581	242.982
38994	27.36	0.26032	11.979		14.3328	2.60581	242.982
39194	27.36	0.26032	11.979		14.3328	2.60581	242.982
39394	26.98	0.26416	11.977		14.1338	2.64424	242.941
39594	26.98	0.26416	11.977		14.1338	2.64424	242.941
39794	24.76	0.26983	11.972		12.9708	2.701	242.84
39994	24.76	0.26983	11.972		12.9708	2.701	242.84
40194	26.7	0.26866	11.976		13.9871	2.68929	242.921
40394	26.7	0.26866	11.976		13.9871	2.68929	242.921
40594	25.96	0.27431	11.97		13.5994	2.74585	242.799
40794	25.96	0.27431	11.97		13.5994	2.74585	242.799
40994	26.78	0.27263	11.979		14.029	2.72903	242.982
41194	26.78	0.27263	11.979		14.029	2.72903	242.982
41394	26.78	0.27263	11.979		14.029	2.72903	242.982
41594	26.78	0.27263	11.979		14.029	2.72903	242.982
41794	26.78	0.27263	11.979		14.029	2.72903	242.982
41994	28.92	0.27648	11.98		15.1501	2.76757	243.002
42194	28.92	0.27648	11.98		15.1501	2.76757	243.002
42394	28.92	0.27648	11.98		15.1501	2.76757	243.002
42594	28.92	0.27648	11.98		15.1501	2.76757	243.002
42794	28.88	0.28029	11.978		15.1291	2.80571	242.961
42994	28.88	0.28029	11.978		15.1291	2.80571	242.961
43194	26.18	0.28554	11.98		13.7147	2.85826	243.002
43394	26.3	0.2855	11.977		13.7776	2.85786	242.941
43594	29.5	0.28438	11.978		15.4539	2.84665	242.961
43794	29.5	0.28438	11.978		15.4539	2.84665	242.961
43994	29.5	0.28438	11.978		15.4539	2.84665	242.961
44194	29.5	0.28438	11.978		15.4539	2.84665	242.961
44394	29.38	0.28822	11.98		15.391	2.88509	243.002
44594	29.38	0.28822	11.98		15.391	2.88509	243.002
44794	26.44	0.29395	11.976		13.8509	2.94244	242.921
44994	26.44	0.29395	11.976		13.8509	2.94244	242.921
45194	29.14	0.2927	11.978		15.2653	2.92993	242.961
45394	29.14	0.2927	11.978		15.2653	2.92993	242.961
45594	27.32	0.29834	11.975		14.3119	2.98639	242.901
45794	27.32	0.29834	11.975		14.3119	2.98639	242.901
45994	29.02	0.29684	11.979		15.2025	2.97137	242.982
46194	29.02	0.29684	11.979		15.2025	2.97137	242.982
46394	28.74	0.30164	11.972		15.0558	3.01942	242.84
46594	28.74	0.30164	11.972		15.0558	3.01942	242.84
46794	28.74	0.30164	11.972		15.0558	3.01942	242.84
46994	28.74	0.30164	11.972		15.0558	3.01942	242.84
47194	28.74	0.30164	11.972		15.0558	3.01942	242.84
47394	28.74	0.30164	11.972		15.0558	3.01942	242.84
47594	28.34	0.30538	11.98		14.8462	3.05686	243.002
47794	30.98	0.30466	11.976		16.2292	3.04965	242.921
47994	30.98	0.30466	11.976		16.2292	3.04965	242.921
48194	27.5	0.31038	11.978		14.4062	3.10691	242.961
48394	27.32	0.31004	11.98		14.3119	3.1035	243.002
48594	30.78	0.30893	11.977		16.1244	3.09239	242.941
48794	30.78	0.30893	11.977		16.1244	3.09239	242.941
48994	28.44	0.31465	11.978		14.8986	3.14965	242.961
49194	28.44	0.31465	11.978		14.8986	3.14965	242.961
49394	30.44	0.31325	11.979		15.9463	3.13564	242.982
49594	30.44	0.31325	11.979		15.9463	3.13564	242.982
49794	29.84	0.31846	11.972		15.632	3.18779	242.84
49994	29.84	0.31846	11.972		15.632	3.18779	242.84
50194	29.86	0.31785	11.976		15.6425	3.18168	242.921
50394	32.46	0.31704	11.976		17.0045	3.17357	242.921
50594	32.46	0.32194	11.973		17.0045	3.22262	242.86
50794	32.46	0.32194	11.973		17.0045	3.22262	242.86
50994	32.46	0.32194	11.973		17.0045	3.22262	242.86
51194	32.34	0.32108	11.978		16.9417	3.21401	242.961
51394	32.34	0.32108	11.978		16.9417	3.21401	242.961
51594	29.08	0.32662	11.981		15.2339	3.26947	243.022
51794	29.26	0.32626	11.978		15.3282	3.26587	242.961
51994	32.74	0.32524	11.977		17.1512	3.25566	242.941
52194	32.74	0.32524	11.977		17.1512	3.25566	242.941
52394	29.22	0.33087	11.979		15.3072	3.31201	242.982
52594	28.88	0.33039	11.982		15.1291	3.30721	243.043
52794	32.66	0.32927	11.978		17.1093	3.296	242.961
52994	32.66	0.32927	11.978		17.1093	3.296	242.961
53194	29.96	0.33501	11.979		15.6949	3.35345	242.982
53394	29.96	0.33501	11.979		15.6949	3.35345	242.982
53594	32.4	0.33336	11.979		16.9731	3.33694	242.982
53794	32.4	0.33336	11.979		16.9731	3.33694	242.982
53994	31.24	0.33867	11.978		16.3654	3.39009	242.961
54194	31.24	0.33867	11.978		16.3654	3.39009	242.961
54394	32.76	0.33753	11.978		17.1617	3.37868	242.961
54594	32.76	0.33753	11.978		17.1617	3.37868	242.961
54794	31.5	0.34297	11.972		16.5016	3.43313	242.84
54994	31.5	0.34297	11.972		16.5016	3.43313	242.84
55194	33	0.34145	11.978		17.2874	3.41792	242.961
55394	33	0.34145	11.978		17.2874	3.41792	242.961
55594	32.32	0.34639	11.971		16.9312	3.46737	242.819
55794	32.32	0.34639	11.971		16.9312	3.46737	242.819
55994	32.64	0.34568	11.98		17.0988	3.46026	243.002
56194	32.64	0.34568	11.98		17.0988	3.46026	243.002
56394	32.98	0.35066	11.971		17.2769	3.51011	242.819
56594	32.98	0.35066	11.971		17.2769	3.51011	242.819
56794	32.94	0.34947	11.977		17.256	3.4982	242.941
56994	32.94	0.34947	11.977		17.256	3.4982	242.941
57194	32.94	0.34947	11.977		17.256	3.4982	242.941
57394	32.94	0.34947	11.977		17.256	3.4982	242.941
57594	32.8	0.35372	11.976		17.1826	3.54074	242.921
57794	32.8	0.35372	11.976		17.1826	3.54074	242.921
57994	32.8	0.35372	11.976		17.1826	3.54074	242.921
58194	32.8	0.35372	11.976		17.1826	3.54074	242.921
58394	33.22	0.35737	11.977		17.4027	3.57728	242.941
58594	35.94	0.35682	11.978		18.8276	3.57177	242.961
58794	35.74	0.36129	11.974		18.7228	3.61652	242.88
58994	35.74	0.36129	11.974		18.7228	3.61652	242.88
59194	35.74	0.36129	11.974		18.7228	3.61652	242.88
59394	35.74	0.36129	11.974		18.7228	3.61652	242.88
59594	35.64	0.36563	11.976		18.6704	3.65996	242.921
59794	35.64	0.36563	11.976		18.6704	3.65996	242.921
59994	35.64	0.36563	11.976		18.6704	3.65996	242.921
60194	36.28	0.3647	11.98		19.0057	3.65065	243.002
60394	36.28	0.3647	11.98		19.0057	3.65065	243.002
60594	36.28	0.3647	11.98		19.0057	3.65065	243.002
60794	36.28	0.3647	11.98		19.0057	3.65065	243.002
60994	36.4	0.36886	11.98		19.0685	3.69229	243.002
61194	36.4	0.36886	11.98		19.0685	3.69229	243.002
61394	33.02	0.37424	11.976		17.2979	3.74615	242.921
61594	33.04	0.37404	11.98		17.3084	3.74414	243.002
61794	36.58	0.3729	11.98		19.1628	3.73273	243.002
61994	36.58	0.3729	11.98		19.1628	3.73273	243.002
62194	33.52	0.37827	11.977		17.5598	3.78649	242.941
62394	33.52	0.37827	11.977		17.5598	3.78649	242.941
62594	36.68	0.37676	11.979		19.2152	3.77137	242.982
62794	36.68	0.37676	11.979		19.2152	3.77137	242.982
62994	34.02	0.38249	11.978		17.8218	3.82873	242.961
63194	34.02	0.38249	11.978		17.8218	3.82873	242.961
63394	36.82	0.38081	11.978		19.2886	3.81191	242.961
63594	36.82	0.38081	11.978		19.2886	3.81191	242.961
63794	34.86	0.386	11.976		18.2618	3.86386	242.921
63994	34.86	0.386	11.976		18.2618	3.86386	242.921
64194	36.96	0.38486	11.979		19.3619	3.85245	242.982
64394	36.96	0.38486	11.979		19.3619	3.85245	242.982
64594	35.22	0.39007	11.975		18.4504	3.9046	242.901
64794	35.22	0.39007	11.975		18.4504	3.9046	242.901
64994	37.16	0.38879	11.978		19.4667	3.89179	242.961
65194	37.16	0.38879	11.978		19.4667	3.89179	242.961
65394	36.02	0.39389	11.972		18.8695	3.94284	242.84
65594	36.02	0.39389	11.972		18.8695	3.94284	242.84
65794	37.42	0.3928	11.974		19.6029	3.93193	242.88
65994	37.42	0.3928	11.974		19.6029	3.93193	242.88
66194	36.54	0.39801	11.972		19.1419	3.98408	242.84
66394	36.54	0.39801	11.972		19.1419	3.98408	242.84
66594	37.68	0.39661	11.977		19.7391	3.97007	242.941
66794	37.68	0.39661	11.977		19.7391	3.97007	242.941
66994	36.9	0.40139	11.975		19.3305	4.01792	242.901
67194	36.9	0.40139	11.975		19.3305	4.01792	242.901
67394	37.94	0.40072	11.978		19.8753	4.01121	242.961
67594	37.94	0.40072	11.978		19.8753	4.01121	242.961
67794	36.8	0.40582	11.973		19.2781	4.06226	242.86
67994	36.8	0.40582	11.973		19.2781	4.06226	242.86
68194	38.58	0.4042	11.98		20.2106	4.04605	243.002
68394	38.58	0.4042	11.98		20.2106	4.04605	243.002
68594	37.32	0.40914	11.978		19.5505	4.0955	242.961
68794	37.32	0.40914	11.978		19.5505	4.0955	242.961
68994	39.12	0.40811	11.978		20.4935	4.08519	242.961
69194	39.12	0.40811	11.978		20.4935	4.08519	242.961
69394	36.98	0.41326	11.974		19.3724	4.13674	242.88
69594	36.98	0.41326	11.974		19.3724	4.13674	242.88
69794	39.64	0.41173	11.978		20.7659	4.12142	242.961
69994	39.64	0.41173	11.978		20.7659	4.12142	242.961
70194	37.44	0.417	11.976		19.6134	4.17417	242.921
70394	37.44	0.417	11.976		19.6134	4.17417	242.921
70594	39.96	0.41581	11.98		20.9335	4.16226	243.002
70794	39.96	0.41581	11.98		20.9335	4.16226	243.002
70994	37.5	0.42118	11.976		19.6448	4.21602	242.921
71194	37.28	0.42015	11.98		19.5295	4.20571	243.002
71394	40.7	0.41926	11.979		21.3212	4.1968	242.982
71594	40.7	0.41926	11.979		21.3212	4.1968	242.982
71794	40.7	0.41926	11.979		21.3212	4.1968	242.982
71994	40.7	0.41926	11.979		21.3212	4.1968	242.982
72194	40.7	0.41926	11.979		21.3212	4.1968	242.982
72394	39.18	0.42779	11.974		20.5249	4.28218	242.88
72594	39.18	0.42779	11.974		20.5249	4.28218	242.88
72794	40.58	0.4266	11.975		21.2583	4.27027	242.901
72994	40.58	0.4266	11.975		21.2583	4.27027	242.901
73194	39.36	0.43152	11.973		20.6192	4.31952	242.86
73394	39.36	0.43152	11.973		20.6192	4.31952	242.86
73594	40.88	0.43049	11.979		21.4154	4.30921	242.982
73794	40.88	0.43049	11.979		21.4154	4.30921	242.982
73994	39.8	0.43527	11.975		20.8497	4.35706	242.901
74194	39.8	0.43527	11.975		20.8497	4.35706	242.901
74394	41.36	0.43442	11.978		21.6669	4.34855	242.961
74594	41.36	0.43442	11.978		21.6669	4.34855	242.961
74794	39.48	0.43928	11.974		20.682	4.3972	242.88
74994	39.48	0.43928	11.974		20.682	4.3972	242.88
75194	42.12	0.43786	11.978		22.065	4.38298	242.961
75394	42.12	0.43786	11.978		22.065	4.38298	242.961
75594	39.66	0.44332	11.974		20.7763	4.43764	242.88
75794	39.66	0.44332	11.974		20.7763	4.43764	242.88
75994	42.62	0.44158	11.979		22.327	4.42022	242.982
76194	42.62	0.44158	11.979		22.327	4.42022	242.982
76394	39.76	0.44708	11.98		20.8287	4.47528	243.002
76594	39.76	0.44708	11.98		20.8287	4.47528	243.002
76794	43.06	0.44543	11.979		22.5575	4.45876	242.982
76994	43.06	0.44543	11.979		22.5575	4.45876	242.982
77194	39.86	0.45085	11.978		20.8811	4.51301	242.961
77394	39.9	0.45024	11.978		20.9021	4.50691	242.961
77594	43.64	0.44903	11.98		22.8613	4.49479	243.002
77794	43.64	0.44903	11.98		22.8613	4.49479	243.002
77994	43.64	0.44903	11.98		22.8613	4.49479	243.002
78194	43.64	0.44903	11.98		22.8613	4.49479	243.002
78394	44.26	0.45301	11.977		23.1861	4.53463	242.941
78594	44.26	0.45301	11.977		23.1861	4.53463	242.941
78794	44.26	0.45301	11.977		23.1861	4.53463	242.941
78994	44.26	0.45301	11.977		23.1861	4.53463	242.941
79194	44.26	0.45301	11.977		23.1861	4.53463	242.941
79394	43.48	0.46148	11.974		22.7775	4.61942	242.88
79594	43.48	0.46148	11.974		22.7775	4.61942	242.88
79794	43.48	0.46148	11.974		22.7775	4.61942	242.88
79994	43.48	0.46148	11.974		22.7775	4.61942	242.88
80194	42.92	0.46538	11.976		22.4841	4.65846	242.921
80394	42.92	0.46538	11.976		22.4841	4.65846	242.921
80594	43.74	0.46449	11.979		22.9137	4.64955	242.982
80794	43.74	0.46449	11.979		22.9137	4.64955	242.982
80994	42.82	0.46921	11.974		22.4317	4.6968	242.88
81194	42.82	0.46921	11.974		22.4317	4.6968	242.88
81394	44.66	0.46817	11.98		23.3956	4.68639	243.002
81594	44.66	0.46817	11.98		23.3956	4.68639	243.002
81794	42.84	0.47271	11.977		22.4422	4.73183	242.941
81994	42.84	0.47271	11.977		22.4422	4.73183	242.941
82194	45.6	0.47164	11.98		23.8881	4.72112	243.002
82394	45.6	0.47164	11.98		23.8881	4.72112	243.002
82594	42.48	0.47663	11.976		22.2536	4.77107	242.921
82794	42.9	0.47629	11.979		22.4736	4.76767	242.982
82994	46.32	0.47539	11.98		24.2653	4.75866	243.002
83194	46.32	0.47539	11.98		24.2653	4.75866	243.002
83394	46.32	0.47539	11.98		24.2653	4.75866	243.002
83594	46.32	0.47539	11.98		24.2653	4.75866	243.002
83794	46.32	0.47539	11.98		24.2653	4.75866	243.002
83994	45.48	0.48358	11.973		23.8252	4.84064	242.86
84194	45.48	0.48358	11.973		23.8252	4.84064	242.86
84394	45.48	0.48358	11.973		23.8252	4.84064	242.86
84594	45.48	0.48358	11.973		23.8252	4.84064	242.86
84794	44.54	0.48801	11.974		23.3328	4.88498	242.88
84994	44.54	0.48801	11.974		23.3328	4.88498	242.88
85194	46.5	0.48633	11.981		24.3595	4.86817	243.022
85394	46.5	0.48633	11.981		24.3595	4.86817	243.022
85594	44.22	0.49152	11.974		23.1651	4.92012	242.88
85794	44.22	0.49152	11.974		23.1651	4.92012	242.88
85994	47.04	0.49014	11.978		24.6424	4.90631	242.961
86194	47.04	0.49014	11.978		24.6424	4.90631	242.961
86394	44.18	0.49534	11.975		23.1442	4.95836	242.901
86594	43.74	0.49499	11.98		22.9137	4.95485	243.002
86794	47.56	0.49375	11.979		24.9148	4.94244	242.982
86994	47.56	0.49375	11.979		24.9148	4.94244	242.982
87194	44.26	0.49911	11.978		23.1861	4.9961	242.961
87394	44.68	0.49846	11.98		23.4061	4.98959	243.002
87594	48.14	0.49755	11.977		25.2187	4.98048	242.941
87794	48.14	0.49755	11.977		25.2187	4.98048	242.941
87994	48.14	0.49755	11.977		25.2187	4.98048	242.941
88194	48.14	0.49755	11.977		25.2187	4.98048	242.941
88394	48.14	0.49755	11.977		25.2187	4.98048	242.941
88594	46.82	0.50591	11.974		24.5272	5.06416	242.88
88794	46.82	0.50591	11.974		24.5272	5.06416	242.88
88994	47.28	0.50535	11.978		24.7682	5.05856	242.961
89194	47.28	0.50535	11.978		24.7682	5.05856	242.961
89394	46	0.51	11.974		24.0976	5.10511	242.88
89594	46	0.51	11.974		24.0976	5.10511	242.88
89794	48.6	0.50849	11.978		25.4597	5.08999	242.961
89994	48.6	0.50849	11.978		25.4597	5.08999	242.961
90194	45.76	0.51368	11.978		23.9719	5.14194	242.961
90394	45.6	0.51334	11.979		23.8881	5.13854	242.982
90594	49.3	0.51214	11.981		25.8264	5.12653	243.022
90794	49.3	0.51214	11.981		25.8264	5.12653	243.022
90994	49.3	0.51214	11.981		25.8264	5.12653	243.022
91194	49.3	0.51214	11.981		25.8264	5.12653	243.022
91394	49.3	0.51214	11.981		25.8264	5.12653	243.022
91594	48.2	0.52043	11.972		25.2501	5.20951	242.84
91794	48.2	0.52043	11.972		25.2501	5.20951	242.84
91994	48.28	0.5199	11.981		25.292	5.2042	243.022
92194	48.28	0.5199	11.981		25.292	5.2042	243.022
92394	47.36	0.52472	11.974		24.8101	5.25245	242.88
92594	47.36	0.52472	11.974		24.8101	5.25245	242.88
92794	49.82	0.52296	11.982		26.0988	5.23483	243.043
92994	49.82	0.52296	11.982		26.0988	5.23483	243.043
93194	47.16	0.52799	11.976		24.7053	5.28519	242.921
93394	47.14	0.5278	11.978		24.6948	5.28328	242.961
93594	50.82	0.52661	11.977		26.6226	5.27137	242.941
93794	50.82	0.52661	11.977		26.6226	5.27137	242.941
93994	50.82	0.52661	11.977		26.6226	5.27137	242.941
94194	50.82	0.52661	11.977		26.6226	5.27137	242.941
94394	50.82	0.52661	11.977		26.6226	5.27137	242.941
94594	50.4	0.53466	11.972		26.4026	5.35195	242.84
94794	50.4	0.53466	11.972		26.4026	5.35195	242.84
94994	50.4	0.53466	11.972		26.4026	5.35195	242.84
95194	50.4	0.53466	11.972		26.4026	5.35195	242.84
95394	48.98	0.53896	11.974		25.6587	5.39499	242.88
95594	48.98	0.53896	11.974		25.6587	5.39499	242.88
95794	50.8	0.53792	11.976		26.6122	5.38458	242.921
95994	50.8	0.53792	11.976		26.6122	5.38458	242.921
96194	48.78	0.54293	11.976		25.554	5.43473	242.921
96394	48.78	0.54293	11.976		25.554	5.43473	242.921
96594	51.56	0.54135	11.979		27.0103	5.41892	242.982
96794	51.56	0.54135	11.979		27.0103	5.41892	242.982
96994	48.6	0.54679	11.974		25.4597	5.47337	242.88
97194	48.52	0.54622	11.979		25.4177	5.46767	242.982
97394	52.34	0.54508	11.978		27.4189	5.45626	242.961
97594	52.34	0.54508	11.978		27.4189	5.45626	242.961
97794	52.34	0.54508	11.978		27.4189	5.45626	242.961
97994	52.34	0.54508	11.978		27.4189	5.45626	242.961
98194	52.96	0.54866	11.977		27.7437	5.49209	242.941
98394	53.16	0.55319	11.973		27.8485	5.53744	242.86
98594	53.16	0.55319	11.973		27.8485	5.53744	242.86
98794	53.16	0.55319	11.973		27.8485	5.53744	242.86
98994	53.16	0.55319	11.973		27.8485	5.53744	242.86
99194	51.2	0.55718	11.973		26.8217	5.57738	242.86
99394	51.2	0.55718	11.973		26.8217	5.57738	242.86
99594	52.04	0.55649	11.979		27.2617	5.57047	242.982
99794	52.04	0.55649	11.979		27.2617	5.57047	242.982
99994	50.18	0.56154	11.972		26.2874	5.62102	242.84
100194	49.7	0.56071	11.979		26.0359	5.61271	242.982
100394	53.34	0.55963	11.98		27.9428	5.6019	243.002
100594	53.34	0.55963	11.98		27.9428	5.6019	243.002
100794	50.34	0.56498	11.977		26.3712	5.65546	242.941
100994	50.36	0.56467	11.977		26.3817	5.65235	242.941
101194	54.08	0.56337	11.978		28.3304	5.63934	242.961
101394	54.08	0.56337	11.978		28.3304	5.63934	242.961
101594	54.08	0.56337	11.978		28.3304	5.63934	242.961
101794	54.08	0.56337	11.978		28.3304	5.63934	242.961
101994	54.08	0.56337	11.978		28.3304	5.63934	242.961
102194	52.08	0.57147	11.975		27.2827	5.72042	242.901
102394	52.08	0.57147	11.975		27.2827	5.72042	242.901
102594	54.28	0.5705	11.98		28.4352	5.71071	243.002
102794	54.28	0.5705	11.98		28.4352	5.71071	243.002
102994	54.28	0.5705	11.98		28.4352	5.71071	243.002
103194	54.28	0.5705	11.98		28.4352	5.71071	243.002
103394	54.28	0.5705	11.98		28.4352	5.71071	243.002
103594	53.76	0.57838	11.971		28.1628	5.78959	242.819
103794	53.76	0.57838	11.971		28.1628	5.78959	242.819
103994	53.76	0.57838	11.971		28.1628	5.78959	242.819
104194	53.76	0.57838	11.971		28.1628	5.78959	242.819
104394	52.58	0.5828	11.973		27.5446	5.83383	242.86
104594	52.58	0.5828	11.973		27.5446	5.83383	242.86
104794	54.86	0.5811	11.979		28.739	5.81682	242.982
104994	54.86	0.5811	11.979		28.739	5.81682	242.982
105194	52.58	0.5859	11.976		27.5446	5.86486	242.921
105394	52.56	0.5858	11.976		27.5341	5.86386	242.921
105594	56.14	0.58465	11.978		29.4096	5.85235	242.961
105794	56.14	0.58465	11.978		29.4096	5.85235	242.961
105994	56.14	0.58465	11.978		29.4096	5.85235	242.961
106194	56.14	0.58465	11.978		29.4096	5.85235	242.961
106394	56.14	0.58465	11.978		29.4096	5.85235	242.961
106594	54.84	0.59331	11.972		28.7286	5.93904	242.84
106794	54.84	0.59331	11.972		28.7286	5.93904	242.84
106994	55	0.59255	11.98		28.8124	5.93143	243.002
107194	55	0.59255	11.98		28.8124	5.93143	243.002
107394	54.22	0.59712	11.972		28.4038	5.97718	242.84
107594	54.22	0.59712	11.972		28.4038	5.97718	242.84
107794	55.3	0.59624	11.98		28.9695	5.96837	243.002
107994	55.3	0.59624	11.98		28.9695	5.96837	243.002
108194	54	0.6013	11.97		28.2885	6.01902	242.799
108394	54	0.6013	11.97		28.2885	6.01902	242.799
108594	56.68	0.59936	11.98		29.6925	5.9996	243.002
108794	56.68	0.59936	11.98		29.6925	5.9996	243.002
108994	54.1	0.60447	11.977		28.3409	6.05075	242.941
109194	54.12	0.60416	11.984		28.3514	6.04765	243.083
109394	57.82	0.60306	11.98		30.2897	6.03664	243.002
109594	57.94	0.60752	11.974		30.3525	6.08128	242.88
109794	57.94	0.60752	11.974		30.3525	6.08128	242.88
109994	57.94	0.60752	11.974		30.3525	6.08128	242.88
110194	57.94	0.60752	11.974		30.3525	6.08128	242.88
110394	55.28	0.61155	11.974		28.9591	6.12162	242.88
110594	55.28	0.61155	11.974		28.9591	6.12162	242.88
110794	57.3	0.61045	11.978		30.0172	6.11061	242.961
110994	57.3	0.61045	11.978		30.0172	6.11061	242.961
111194	57.3	0.61045	11.978		30.0172	6.11061	242.961
111394	57.3	0.61045	11.978		30.0172	6.11061	242.961
111594	58.68	0.61346	11.976		30.7402	6.14074	242.921
111794	59.04	0.61754	11.976		30.9288	6.18158	242.921
111994	59.04	0.61754	11.976		30.9288	6.18158	242.921
112194	59.04	0.61754	11.976		30.9288	6.18158	242.921
112394	59.04	0.61754	11.976		30.9288	6.18158	242.921
112594	56.26	0.62261	11.973		29.4724	6.23233	242.86
112794	56.26	0.62261	11.973		29.4724	6.23233	242.86
112994	58.54	0.62071	11.979		30.6668	6.21331	242.982
113194	58.54	0.62071	11.979		30.6668	6.21331	242.982
113394	56.1	0.62556	11.978		29.3886	6.26186	242.961
113594	56.28	0.6254	11.978		29.4829	6.26026	242.961
113794	56.28	0.6254	11.978		29.4829	6.26026	242.961
113994	56.28	0.6254	11.978		29.4829	6.26026	242.961
114194	56.28	0.6254	11.978		29.4829	6.26026	242.961
114394	58.48	0.62793	11.976		30.6354	6.28559	242.921
114594	58.48	0.62793	11.976		30.6354	6.28559	242.921
114794	56.88	0.63269	11.974		29.7972	6.33323	242.88
114994	56.88	0.63269	11.974		29.7972	6.33323	242.88
115194	59.88	0.63134	11.98		31.3688	6.31972	243.002
115394	59.88	0.63134	11.98		31.3688	6.31972	243.002
115594	59.88	0.63134	11.98		31.3688	6.31972	243.002
115794	59.88	0.63134	11.98		31.3688	6.31972	243.002
115994	59.88	0.63134	11.98		31.3688	6.31972	243.002
116194	58.06	0.63948	11.974		30.4154	6.4012	242.88
116394	58.06	0.63948	11.974		30.4154	6.4012	242.88
116594	59.84	0.63866	11.978		31.3479	6.39299	242.961
116794	59.84	0.63866	11.978		31.3479	6.39299	242.961
116994	57.02	0.64364	11.979		29.8706	6.44284	242.982
117194	57.4	0.64281	11.981		30.0696	6.43453	243.022
117394	60.96	0.64176	11.982		31.9346	6.42402	243.043
117594	61.46	0.64589	11.973		32.1965	6.46537	242.86
117794	61.46	0.64589	11.973		32.1965	6.46537	242.86
117994	61.46	0.64589	11.973		32.1965	6.46537	242.86
118194	61.46	0.64589	11.973		32.1965	6.46537	242.86
118394	58.7	0.65056	11.972		30.7507	6.51211	242.84
118594	58.7	0.65056	11.972		30.7507	6.51211	242.84
118794	61.02	0.64884	11.98		31.966	6.49489	243.002
118994	61.02	0.64884	11.98		31.966	6.49489	243.002
119194	58.22	0.65402	11.978		30.4992	6.54675	242.961
119394	58.68	0.65346	11.976		30.7402	6.54114	242.921
119594	58.68	0.65346	11.976		30.7402	6.54114	242.921
119794	58.68	0.65346	11.976		30.7402	6.54114	242.921
119994	58.68	0.65346	11.976		30.7402	6.54114	242.921
120194	60.58	0.6564	11.978		31.7355	6.57057	242.961
120394	60.58	0.6564	11.978		31.7355	6.57057	242.961
120594	59.48	0.66088	11.974		31.1593	6.61542	242.88
120794	59.48	0.66088	11.974		31.1593	6.61542	242.88
120994	61.98	0.65971	11.979		32.4689	6.6037	242.982
121194	61.98	0.65971	11.979		32.4689	6.6037	242.982
121394	58.92	0.66478	11.978		30.8659	6.65445	242.961
121594	59.18	0.66429	11.977		31.0021	6.64955	242.941
121794	62.98	0.66296	11.978		32.9928	6.63624	242.961
121994	63.22	0.66727	11.974		33.1185	6.67938	242.88
122194	63.22	0.66727	11.974		33.1185	6.67938	242.88
122394	63.22	0.66727	11.974		33.1185	6.67938	242.88
122594	63.22	0.66727	11.974		33.1185	6.67938	242.88
122794	60.9	0.67169	11.974		31.9032	6.72362	242.88
122994	60.9	0.67169	11.974		31.9032	6.72362	242.88
123194	62.56	0.6705	11.98		32.7728	6.71171	243.002
123394	62.56	0.6705	11.98		32.7728	6.71171	243.002
123594	60.22	0.67552	11.975		31.5469	6.76196	242.901
123794	59.76	0.67508	11.98		31.3059	6.75756	243.002
123994	63.68	0.67401	11.978		33.3595	6.74685	242.961
124194	63.68	0.67401	11.978		33.3595	6.74685	242.961
124394	63.68	0.67401	11.978		33.3595	6.74685	242.961
124594	63.68	0.67401	11.978		33.3595	6.74685	242.961
124794	63.68	0.67401	11.978		33.3595	6.74685	242.961
124994	61.82	0.68236	11.972		32.3851	6.83043	242.84
125194	61.82	0.68236	11.972		32.3851	6.83043	242.84
125394	62.98	0.68136	11.978		32.9928	6.82042	242.961
125594	62.98	0.68136	11.978		32.9928	6.82042	242.961
125794	61.06	0.68633	11.974		31.987	6.87017	242.88
125994	60.72	0.68575	11.981		31.8089	6.86436	243.022
126194	64.58	0.6846	11.978		33.831	6.85285	242.961
126394	64.58	0.6846	11.978		33.831	6.85285	242.961
126594	64.58	0.6846	11.978		33.831	6.85285	242.961
126794	64.58	0.6846	11.978		33.831	6.85285	242.961
126994	64.58	0.6846	11.978		33.831	6.85285	242.961
127194	62.72	0.69335	11.97		32.8566	6.94044	242.799
127394	62.72	0.69335	11.97		32.8566	6.94044	242.799
127594	64.84	0.69161	11.979		33.9672	6.92302	242.982
127794	64.84	0.69161	11.979		33.9672	6.92302	242.982
127994	64.84	0.69161	11.979		33.9672	6.92302	242.982
128194	64.84	0.69161	11.979		33.9672	6.92302	242.982
128394	64.84	0.69161	11.979		33.9672	6.92302	242.982
128594	63.18	0.69999	11.97		33.0976	7.00691	242.799
128794	63.18	0.69999	11.97		33.0976	7.00691	242.799
128994	65.22	0.69847	11.978		34.1662	6.99169	242.961
129194	65.22	0.69847	11.978		34.1662	6.99169	242.961
129394	65.22	0.69847	11.978		34.1662	6.99169	242.961
129594	65.22	0.69847	11.978		34.1662	6.99169	242.961
129794	65.22	0.69847	11.978		34.1662	6.99169	242.961
129994	65.32	0.70644	11.974		34.2186	7.07147	242.88
130194	65.32	0.70644	11.974		34.2186	7.07147	242.88
130394	64.86	0.7058	11.979		33.9776	7.06507	242.982
130594	64.86	0.7058	11.979		33.9776	7.06507	242.982
130794	63.56	0.71025	11.976		33.2966	7.10961	242.921
130994	63.56	0.71025	11.976		33.2966	7.10961	242.921
131194	66.68	0.70886	11.978		34.9311	7.0957	242.961
131394	66.68	0.70886	11.978		34.9311	7.0957	242.961
131594	66.68	0.70886	11.978		34.9311	7.0957	242.961
131794	66.68	0.70886	11.978		34.9311	7.0957	242.961
131994	66.68	0.70886	11.978		34.9311	7.0957	242.961
132194	64.4	0.71716	11.973		33.7367	7.17878	242.86
132394	64.4	0.71716	11.973		33.7367	7.17878	242.86
132594	67.08	0.71582	11.98		35.1406	7.16537	243.002
132794	67.08	0.71582	11.98		35.1406	7.16537	243.002
132994	67.08	0.71582	11.98		35.1406	7.16537	243.002
133194	67.08	0.71582	11.98		35.1406	7.16537	243.002
133394	67.08	0.71582	11.98		35.1406	7.16537	243.002
133594	65.4	0.72401	11.973		34.2605	7.24735	242.86
133794	65.4	0.72401	11.973		34.2605	7.24735	242.86
133994	67.24	0.72297	11.98		35.2244	7.23694	243.002
134194	67.24	0.72297	11.98		35.2244	7.23694	243.002
134394	64.3	0.7278	11.979		33.6843	7.28529	242.982
134594	64.56	0.7273	11.98		33.8205	7.28028	243.002
134794	68.56	0.7261	11.981		35.9159	7.26827	243.022
134994	68.14	0.73025	11.977		35.6959	7.30981	242.941
135194	68.14	0.73025	11.977		35.6959	7.30981	242.941
135394	68.14	0.73025	11.977		35.6959	7.30981	242.941
135594	68.14	0.73025	11.977		35.6959	7.30981	242.941
135794	65.68	0.73471	11.976		34.4072	7.35445	242.921
135994	65.68	0.73471	11.976		34.4072	7.35445	242.921
136194	68.64	0.73308	11.982		35.9578	7.33814	243.043
136394	68.64	0.73308	11.982		35.9578	7.33814	243.043
136594	68.64	0.73308	11.982		35.9578	7.33814	243.043
136794	68.64	0.73308	11.982		35.9578	7.33814	243.043
136994	68.64	0.73308	11.982		35.9578	7.33814	243.043
137194	67.3	0.74135	11.972		35.2559	7.42092	242.84
137394	67.3	0.74135	11.972		35.2559	7.42092	242.84
137594	68.08	0.74067	11.98		35.6645	7.41411	243.002
137794	68.08	0.74067	11.98		35.6645	7.41411	243.002
137994	66.14	0.74535	11.979		34.6482	7.46096	242.982
138194	66.2	0.74473	11.979		34.6796	7.45475	242.982
138394	69.78	0.74368	11.982		36.555	7.44424	243.043
138594	69.78	0.74368	11.982		36.555	7.44424	243.043
138794	69.78	0.74368	11.982		36.555	7.44424	243.043
138994	69.78	0.74368	11.982		36.555	7.44424	243.043
139194	69.78	0.74368	11.982		36.555	7.44424	243.043
139394	67.4	0.75221	11.977		35.3082	7.52963	242.941
139594	67.4	0.75221	11.977		35.3082	7.52963	242.941
139794	69.86	0.75075	11.982		36.5969	7.51502	243.043
139994	69.86	0.75075	11.982		36.5969	7.51502	243.043
140194	69.86	0.75075	11.982		36.5969	7.51502	243.043
140394	69.86	0.75075	11.982		36.5969	7.51502	243.043
140594	69.86	0.75075	11.982		36.5969	7.51502	243.043
140794	70.02	0.75849	11.974		36.6808	7.59249	242.88
140994	70.02	0.75849	11.974		36.6808	7.59249	242.88
141194	70.02	0.75849	11.974		36.6808	7.59249	242.88
141394	70.02	0.75849	11.974		36.6808	7.59249	242.88
141594	68	0.7629	11.977		35.6226	7.63664	242.941
141794	68	0.7629	11.977		35.6226	7.63664	242.941
141994	71.24	0.76107	11.98		37.3199	7.61832	243.002
142194	71.24	0.76107	11.98		37.3199	7.61832	243.002
142394	71.24	0.76107	11.98		37.3199	7.61832	243.002
142594	71.24	0.76107	11.98		37.3199	7.61832	243.002
142794	71.24	0.76107	11.98		37.3199	7.61832	243.002
142994	69.16	0.76979	11.972		36.2302	7.70561	242.84
143194	69.16	0.76979	11.972		36.2302	7.70561	242.84
143394	71.46	0.76819	11.978		37.4351	7.68959	242.961
143594	71.46	0.76819	11.978		37.4351	7.68959	242.961
143794	68.48	0.77303	11.98		35.874	7.73804	243.002
143994	68.96	0.77266	11.978		36.1255	7.73433	242.961
144194	68.96	0.77266	11.978		36.1255	7.73433	242.961
144394	68.96	0.77266	11.978		36.1255	7.73433	242.961
144594	68.96	0.77266	11.978		36.1255	7.73433	242.961
144794	71.5	0.77517	11.977		37.4561	7.75946	242.941
144994	71.5	0.77517	11.977		37.4561	7.75946	242.941
145194	69.12	0.78001	11.977		36.2093	7.80791	242.941
145394	69.12	0.77961	11.978		36.2093	7.8039	242.961
145594	72.84	0.77841	11.981		38.1581	7.79189	243.022
145794	72.78	0.78293	11.974		38.1266	7.83714	242.88
145994	72.78	0.78293	11.974		38.1266	7.83714	242.88
146194	72.78	0.78293	11.974		38.1266	7.83714	242.88
146394	72.78	0.78293	11.974		38.1266	7.83714	242.88
146594	69.96	0.78671	11.977		36.6493	7.87497	242.941
146794	69.48	0.78668	11.979		36.3979	7.87467	242.982
146994	73.5	0.78537	11.979		38.5038	7.86156	242.982
147194	73.4	0.78951	11.976		38.4514	7.903	242.921
147394	73.4	0.78951	11.976		38.4514	7.903	242.921
147594	73.4	0.78951	11.976		38.4514	7.903	242.921
147794	73.4	0.78951	11.976		38.4514	7.903	242.921
147994	70.64	0.79358	11.974		37.0056	7.94374	242.88
148194	70.64	0.79358	11.974		37.0056	7.94374	242.88
148394	73.9	0.79233	11.978		38.7133	7.93123	242.961
148594	73.9	0.79233	11.978		38.7133	7.93123	242.961
148794	73.9	0.79233	11.978		38.7133	7.93123	242.961
148994	73.9	0.79233	11.978		38.7133	7.93123	242.961
149194	73.9	0.79233	11.978		38.7133	7.93123	242.961
149394	71.6	0.80064	11.973		37.5085	8.01441	242.86
149594	71.6	0.80064	11.973		37.5085	8.01441	242.86
149794	73.88	0.79934	11.976		38.7029	8.0014	242.921
149994	73.88	0.79934	11.976		38.7029	8.0014	242.921
150194	73.88	0.79934	11.976		38.7029	8.0014	242.921
150394	73.88	0.79934	11.976		38.7029	8.0014	242.921
150594	73.88	0.79934	11.976		38.7029	8.0014	242.921
150794	73.14	0.8072	11.97		38.3152	8.08008	242.799
150994	73.14	0.8072	11.97		38.3152	8.08008	242.799
151194	73.48	0.80668	11.976		38.4933	8.07487	242.921
151394	73.48	0.80668	11.976		38.4933	8.07487	242.921
151594	71.72	0.8114	11.974		37.5713	8.12212	242.88
151794	71.72	0.8114	11.974		37.5713	8.12212	242.88
151994	75.44	0.8094	11.976		39.5201	8.1021	242.921
152194	75.44	0.8094	11.976		39.5201	8.1021	242.921
152394	75.44	0.8094	11.976		39.5201	8.1021	242.921
152594	75.44	0.8094	11.976		39.5201	8.1021	242.921
152794	75.44	0.8094	11.976		39.5201	8.1021	242.921
152994	72.94	0.81827	11.97		38.2104	8.19089	242.799
153194	72.94	0.81827	11.97		38.2104	8.19089	242.799
153394	75.26	0.81676	11.982		39.4258	8.17578	243.043
153594	75.26	0.81676	11.982		39.4258	8.17578	243.043
153794	72.34	0.82178	11.977		37.8961	8.22603	242.941
153994	72.68	0.82116	11.98		38.0742	8.21982	243.002
154194	72.68	0.82116	11.98		38.0742	8.21982	243.002
154394	72.68	0.82116	11.98		38.0742	8.21982	243.002
154594	72.68	0.82116	11.98		38.0742	8.21982	243.002
154794	74.7	0.82426	11.979		39.1324	8.25085	242.982
154994	74.7	0.82426	11.979		39.1324	8.25085	242.982
155194	73.54	0.82876	11.972		38.5248	8.2959	242.84
155394	73.54	0.82876	11.972		38.5248	8.2959	242.84
155594	76.56	0.8273	11.978		40.1068	8.28128	242.961
155794	76.56	0.8273	11.978		40.1068	8.28128	242.961
155994	76.56	0.8273	11.978		40.1068	8.28128	242.961
156194	76.56	0.8273	11.978		40.1068	8.28128	242.961
156394	76.56	0.8273	11.978		40.1068	8.28128	242.961
156594	75.52	0.83567	11.974		39.562	8.36507	242.88
156794	75.52	0.83567	11.974		39.562	8.36507	242.88
156994	76.46	0.83434	11.978		40.0544	8.35175	242.961
157194	76.46	0.83434	11.978		40.0544	8.35175	242.961
157394	74.04	0.83919	11.979		38.7867	8.4003	242.982
157594	73.9	0.83884	11.978		38.7133	8.3968	242.961
157794	73.9	0.83884	11.978		38.7133	8.3968	242.961
157994	73.9	0.83884	11.978		38.7133	8.3968	242.961
158194	73.9	0.83884	11.978		38.7133	8.3968	242.961
158394	76.72	0.84125	11.978		40.1906	8.42092	242.961
158594	76.72	0.84125	11.978		40.1906	8.42092	242.961
158794	74.74	0.84594	11.976		39.1534	8.46787	242.921
158994	74.74	0.84594	11.976		39.1534	8.46787	242.921
159194	78.34	0.84458	11.977		41.0393	8.45425	242.941
159394	78.34	0.84458	11.977		41.0393	8.45425	242.941
159594	78.34	0.84458	11.977		41.0393	8.45425	242.941
159794	78.34	0.84458	11.977		41.0393	8.45425	242.941
159994	78.34	0.84458	11.977		41.0393	8.45425	242.941
160194	75.56	0.85295	11.975		39.583	8.53804	242.901
160394	75.56	0.85295	11.975		39.583	8.53804	242.901
160594	78.24	0.85182	11.979		40.9869	8.52673	242.982
160794	78.24	0.85182	11.979		40.9869	8.52673	242.982
160994	78.24	0.85182	11.979		40.9869	8.52673	242.982
161194	78.24	0.85182	11.979		40.9869	8.52673	242.982
161394	78.24	0.85182	11.979		40.9869	8.52673	242.982
161594	76.7	0.85996	11.974		40.1802	8.60821	242.88
161794	76.7	0.85996	11.974		40.1802	8.60821	242.88
161994	78.2	0.85893	11.982		40.966	8.5979	243.043
162194	78.2	0.85893	11.982		40.966	8.5979	243.043
162394	78.2	0.85893	11.982		40.966	8.5979	243.043
162594	78.2	0.85893	11.982		40.966	8.5979	243.043
162794	78.2	0.85893	11.982		40.966	8.5979	243.043
162994	77.02	0.86684	11.972		40.3478	8.67708	242.84
163194	77.02	0.86684	11.972		40.3478	8.67708	242.84
163394	79.18	0.86529	11.977		41.4793	8.66156	242.941
163594	79.18	0.86529	11.977		41.4793	8.66156	242.941
163794	79.18	0.86529	11.977		41.4793	8.66156	242.941
163994	79.18	0.86529	11.977		41.4793	8.66156	242.941
164194	79.18	0.86529	11.977		41.4793	8.66156	242.941
164394	77.66	0.87342	11.973		40.6831	8.74294	242.86
164594	77.66	0.87342	11.973		40.6831	8.74294	242.86
164794	79.62	0.87223	11.98		41.7098	8.73103	243.002
164994	79.62	0.87223	11.98		41.7098	8.73103	243.002
165194	79.62	0.87223	11.98		41.7098	8.73103	243.002
165394	79.62	0.87223	11.98		41.7098	8.73103	243.002
165594	79.62	0.87223	11.98		41.7098	8.73103	243.002
165794	78.22	0.88032	11.971		40.9764	8.81201	242.819
165994	78.22	0.88032	11.971		40.9764	8.81201	242.819
166194	80.04	0.87899	11.98		41.9299	8.7987	243.002
166394	80.04	0.87899	11.98		41.9299	8.7987	243.002
166594	80.04	0.87899	11.98		41.9299	8.7987	243.002
166794	80.04	0.87899	11.98		41.9299	8.7987	243.002
166994	80.04	0.87899	11.98		41.9299	8.7987	243.002
167194	79.22	0.88707	11.971		41.5003	8.87958	242.819
167394	79.22	0.88707	11.971		41.5003	8.87958	242.819
167594	80.02	0.88619	11.981		41.9194	8.87077	243.022
167794	80.02	0.88619	11.981		41.9194	8.87077	243.022
167994	80.02	0.88619	11.981		41.9194	8.87077	243.022
168194	80.02	0.88619	11.981		41.9194	8.87077	243.022
168394	80.02	0.88619	11.981		41.9194	8.87077	243.022
168594	80.02	0.89379	11.972		41.9194	8.94685	242.84
168794	80.02	0.89379	11.972		41.9194	8.94685	242.84
168994	80.5	0.89293	11.982		42.1708	8.93824	243.043
169194	80.5	0.89293	11.982		42.1708	8.93824	243.043
169394	78.56	0.8977	11.978		41.1545	8.98599	242.961
169594	78.3	0.89719	11.98		41.0183	8.98088	243.002
169794	82.26	0.89601	11.978		43.0928	8.96907	242.961
169994	82.26	0.89601	11.978		43.0928	8.96907	242.961
170194	82.26	0.89601	11.978		43.0928	8.96907	242.961
170394	82.26	0.89601	11.978		43.0928	8.96907	242.961
170594	82.26	0.89601	11.978		43.0928	8.96907	242.961
170794	79.5	0.90478	11.976		41.647	9.05686	242.921
170994	79.5	0.90478	11.976		41.647	9.05686	242.921
171194	82.54	0.90311	11.978		43.2395	9.04014	242.961
171394	82.54	0.90311	11.978		43.2395	9.04014	242.961
171594	82.54	0.90311	11.978		43.2395	9.04014	242.961
171794	82.54	0.90311	11.978		43.2395	9.04014	242.961
171994	82.54	0.90311	11.978		43.2395	9.04014	242.961
172194	80.46	0.91164	11.972		42.1499	9.12553	242.84
172394	80.46	0.91164	11.972		42.1499	9.12553	242.84
172594	83.04	0.90974	11.981		43.5014	9.10651	243.022
172794	83.04	0.90974	11.981		43.5014	9.10651	243.022
172994	83.04	0.90974	11.981		43.5014	9.10651	243.022
173194	83.04	0.90974	11.981		43.5014	9.10651	243.022
173394	83.04	0.90974	11.981		43.5014	9.10651	243.022
173594	81	0.91825	11.97		42.4328	9.19169	242.799
173794	81	0.91825	11.97		42.4328	9.19169	242.799
173994	83.54	0.91676	11.98		43.7634	9.17678	243.002
174194	83.54	0.91676	11.98		43.7634	9.17678	243.002
174394	83.54	0.91676	11.98		43.7634	9.17678	243.002
174594	83.54	0.91676	11.98		43.7634	9.17678	243.002
174794	83.54	0.91676	11.98		43.7634	9.17678	243.002
174994	81.44	0.925	11.975		42.6633	9.25926	242.901
175194	81.44	0.925	11.975		42.6633	9.25926	242.901
175394	84.04	0.92359	11.98		44.0253	9.24515	243.002
175594	84.04	0.92359	11.98		44.0253	9.24515	243.002
175794	84.04	0.92359	11.98		44.0253	9.24515	243.002
175994	84.04	0.92359	11.98		44.0253	9.24515	243.002
176194	84.04	0.92359	11.98		44.0253	9.24515	243.002
176394	82.64	0.93178	11.973		43.2919	9.32713	242.86
176594	82.64	0.93178	11.973		43.2919	9.32713	242.86
176794	84.24	0.93052	11.979		44.1301	9.31451	242.982
176994	84.24	0.93052	11.979		44.1301	9.31451	242.982
177194	81.44	0.9353	11.977		42.6633	9.36236	242.941
177394	81.84	0.93496	11.978		42.8728	9.35896	242.961
177594	81.84	0.93496	11.978		42.8728	9.35896	242.961
177794	81.84	0.93496	11.978		42.8728	9.35896	242.961
177994	81.84	0.93496	11.978		42.8728	9.35896	242.961
178194	84.68	0.93736	11.978		44.3606	9.38298	242.961
178394	84.68	0.93736	11.978		44.3606	9.38298	242.961
178594	84.68	0.93736	11.978		44.3606	9.38298	242.961
178794	84.68	0.93736	11.978		44.3606	9.38298	242.961
178994	84.68	0.93736	11.978		44.3606	9.38298	242.961
179194	83.72	0.9456	11.972		43.8577	9.46547	242.84
179394	83.72	0.9456	11.972		43.8577	9.46547	242.84
179594	85.74	0.94399	11.978		44.9159	9.44935	242.961
179794	85.74	0.94399	11.978		44.9159	9.44935	242.961
179994	85.74	0.94399	11.978		44.9159	9.44935	242.961
180194	85.74	0.94399	11.978		44.9159	9.44935	242.961
180394	85.74	0.94399	11.978		44.9159	9.44935	242.961
180594	83.7	0.9523	11.97		43.8472	9.53253	242.799
180794	83.7	0.9523	11.97		43.8472	9.53253	242.799
180994	86.16	0.95084	11.98		45.1359	9.51792	243.002
181194	86.16	0.95084	11.98		45.1359	9.51792	243.002
181394	86.16	0.95084	11.98		45.1359	9.51792	243.002
181594	86.16	0.95084	11.98		45.1359	9.51792	243.002
181794	86.16	0.95084	11.98		45.1359	9.51792	243.002
181994	84.04	0.95909	11.974		44.0253	9.6005	242.88
182194	84.04	0.95909	11.974		44.0253	9.6005	242.88
182394	86.66	0.95767	11.98		45.3978	9.58629	243.002
182594	86.66	0.95767	11.98		45.3978	9.58629	243.002
182794	86.66	0.95767	11.98		45.3978	9.58629	243.002
182994	86.66	0.95767	11.98		45.3978	9.58629	243.002
183194	86.66	0.95767	11.98		45.3978	9.58629	243.002
183394	84.58	0.9659	11.972		44.3082	9.66867	242.84
183594	84.58	0.9659	11.972		44.3082	9.66867	242.84
183794	87.16	0.96449	11.978		45.6597	9.65455	242.961
183994	87.16	0.96449	11.978		45.6597	9.65455	242.961
184194	87.16	0.96449	11.978		45.6597	9.65455	242.961
184394	87.16	0.96449	11.978		45.6597	9.65455	242.961
184594	87.16	0.96449	11.978		45.6597	9.65455	242.961
184794	85.04	0.97264	11.973		44.5492	9.73614	242.86
184994	85.04	0.97264	11.973		44.5492	9.73614	242.86
185194	87.7	0.9713	11.978		45.9426	9.72272	242.961
185394	87.7	0.9713	11.978		45.9426	9.72272	242.961
185594	87.7	0.9713	11.978		45.9426	9.72272	242.961
185794	87.7	0.9713	11.978		45.9426	9.72272	242.961
185994	87.7	0.9713	11.978		45.9426	9.72272	242.961
186194	85.78	0.97938	11.973		44.9368	9.8036	242.86
186394	85.78	0.97938	11.973		44.9368	9.8036	242.86
186594	87.88	0.97824	11.976		46.0369	9.79219	242.921
186794	87.88	0.97824	11.976		46.0369	9.79219	242.921
186994	87.88	0.97824	11.976		46.0369	9.79219	242.921
187194	87.88	0.97824	11.976		46.0369	9.79219	242.921
187394	87.88	0.97824	11.976		46.0369	9.79219	242.921
187594	86.32	0.98619	11.974		45.2197	9.87177	242.88
187794	86.32	0.98619	11.974		45.2197	9.87177	242.88
187994	88.42	0.98505	11.981		46.3198	9.86036	243.022
188194	88.42	0.98505	11.981		46.3198	9.86036	243.022
188394	88.42	0.98505	11.981		46.3198	9.86036	243.022
188594	88.42	0.98505	11.981		46.3198	9.86036	243.022
188794	88.42	0.98505	11.981		46.3198	9.86036	243.022
188994	87	0.99275	11.974		45.5759	9.93744	242.88
189194	87	0.99275	11.974		45.5759	9.93744	242.88
189394	89.38	0.99162	11.98		46.8227	9.92613	243.002
189594	89.38	0.99162	11.98		46.8227	9.92613	243.002
189794	89.38	0.99162	11.98		46.8227	9.92613	243.002
189994	89.38	0.99162	11.98		46.8227	9.92613	243.002
190194	89.38	0.99162	11.98		46.8227	9.92613	243.002
190394	87.18	0.99979	11.974		45.6702	10.0079	242.88
190594	87.18	0.99979	11.974		45.6702	10.0079	242.88
190794	89.86	0.99835	11.98		47.0742	9.99349	243.002
190994	89.86	0.99835	11.98		47.0742	9.99349	243.002
191194	89.86	0.99835	11.98		47.0742	9.99349	243.002
191394	89.86	0.99835	11.98		47.0742	9.99349	243.002
191594	89.86	0.99835	11.98		47.0742	9.99349	243.002
191794	87.7	1.00661	11.976		45.9426	10.0762	242.921
191994	87.7	1.00661	11.976		45.9426	10.0762	242.921
192194	90.58	1.0052	11.979		47.4514	10.0621	242.982
192394	90.58	1.0052	11.979		47.4514	10.0621	242.982
192594	90.58	1.0052	11.979		47.4514	10.0621	242.982
192794	90.58	1.0052	11.979		47.4514	10.0621	242.982
192994	90.58	1.0052	11.979		47.4514	10.0621	242.982
193194	88.14	1.01345	11.974		46.1731	10.1446	242.88
193394	88.14	1.01345	11.974		46.1731	10.1446	242.88
193594	91.18	1.01189	11.977		47.7657	10.129	242.941
193794	91.18	1.01189	11.977		47.7657	10.129	242.941
193994	91.18	1.01189	11.977		47.7657	10.129	242.941
194194	91.18	1.01189	11.977		47.7657	10.129	242.941
194394	91.18	1.01189	11.977		47.7657	10.129	242.941
194594	88.62	1.02028	11.974		46.4246	10.213	242.88
194794	88.62	1.02028	11.974		46.4246	10.213	242.88
194994	91.58	1.01875	11.978		47.9752	10.1977	242.961
195194	91.58	1.01875	11.978		47.9752	10.1977	242.961
195394	91.58	1.01875	11.978		47.9752	10.1977	242.961
195594	91.58	1.01875	11.978		47.9752	10.1977	242.961
195794	91.58	1.01875	11.978		47.9752	10.1977	242.961
195994	88.9	1.02738	11.974		46.5713	10.2841	242.88
196194	88.9	1.02738	11.974		46.5713	10.2841	242.88
196394	92.16	1.02544	11.977		48.2791	10.2647	242.941
196594	92.16	1.02544	11.977		48.2791	10.2647	242.941
196794	92.16	1.02544	11.977		48.2791	10.2647	242.941
196994	92.16	1.02544	11.977		48.2791	10.2647	242.941
197194	92.16	1.02544	11.977		48.2791	10.2647	242.941
197394	89.3	1.03414	11.976		46.7808	10.3518	242.921
197594	89.3	1.03414	11.976		46.7808	10.3518	242.921
197794	92.96	1.03196	11.978		48.6981	10.3299	242.961
197994	92.74	1.03594	11.975		48.5829	10.3698	242.901
198194	92.74	1.03594	11.975		48.5829	10.3698	242.901
198394	92.74	1.03594	11.975		48.5829	10.3698	242.901
198594	92.74	1.03594	11.975		48.5829	10.3698	242.901
198794	92.74	1.03594	11.975		48.5829	10.3698	242.901
198994	92.74	1.03594	11.975		48.5829	10.3698	242.901
199194	92.74	1.03594	11.975		48.5829	10.3698	242.901
199394	90.78	1.04353	11.97		47.5561	10.4457	242.799
199594	90.78	1.04353	11.97		47.5561	10.4457	242.799
199794	93.06	1.04233	11.982		48.7505	10.4337	243.043
199994	93.06	1.04233	11.982		48.7505	10.4337	243.043
200194	93.06	1.04233	11.982		48.7505	10.4337	243.043
200394	93.06	1.04233	11.982		48.7505	10.4337	243.043
200594	93.06	1.04233	11.982		48.7505	10.4337	243.043
200794	91.06	1.05053	11.975		47.7028	10.5158	242.901
200994	91.06	1.05053	11.975		47.7028	10.5158	242.901
201194	93.36	1.04922	11.978		48.9077	10.5027	242.961
201394	93.36	1.04922	11.978		48.9077	10.5027	242.961
201594	93.36	1.04922	11.978		48.9077	10.5027	242.961
201794	93.36	1.04922	11.978		48.9077	10.5027	242.961
201994	93.36	1.04922	11.978		48.9077	10.5027	242.961
202194	91.7	1.05711	11.973		48.0381	10.5817	242.86
202394	91.7	1.05711	11.973		48.0381	10.5817	242.86
202594	93.86	1.05605	11.979		49.1696	10.5711	242.982
202794	93.86	1.05605	11.979		49.1696	10.5711	242.982
202994	93.86	1.05605	11.979		49.1696	10.5711	242.982
203194	93.86	1.05605	11.979		49.1696	10.5711	242.982
203394	93.86	1.05605	11.979		49.1696	10.5711	242.982
203594	92.3	1.0643	11.974		48.3524	10.6537	242.88
203794	92.3	1.0643	11.974		48.3524	10.6537	242.88
203994	94.74	1.06244	11.976		49.6306	10.635	242.921
204194	94.74	1.06244	11.976		49.6306	10.635	242.921
204394	94.74	1.06244	11.976		49.6306	10.635	242.921
204594	94.74	1.06244	11.976		49.6306	10.635	242.921
204794	94.74	1.06244	11.976		49.6306	10.635	242.921
204994	91.94	1.07082	11.971		48.1638	10.7189	242.819
205194	91.94	1.07082	11.971		48.1638	10.7189	242.819
205394	95.32	1.06934	11.981		49.9345	10.7041	243.022
205594	95.32	1.06934	11.981		49.9345	10.7041	243.022
205794	95.32	1.06934	11.981		49.9345	10.7041	243.022
205994	95.32	1.06934	11.981		49.9345	10.7041	243.022
206194	95.32	1.06934	11.981		49.9345	10.7041	243.022
206394	92.26	1.07791	11.976		48.3314	10.7899	242.921
206594	92.5	1.07673	11.981		48.4572	10.7781	243.022
206794	92.5	1.07673	11.981		48.4572	10.7781	243.022
206994	92.5	1.07673	11.981		48.4572	10.7781	243.022
207194	92.5	1.07673	11.981		48.4572	10.7781	243.022
207394	95.28	1.07955	11.978		49.9135	10.8063	242.961
207594	95.28	1.07955	11.978		49.9135	10.8063	242.961
207794	95.28	1.07955	11.978		49.9135	10.8063	242.961
207994	95.28	1.07955	11.978		49.9135	10.8063	242.961
208194	95.28	1.07955	11.978		49.9135	10.8063	242.961
208394	93.54	1.08756	11.973		49.002	10.8865	242.86
208594	93.54	1.08756	11.973		49.002	10.8865	242.86
208794	96.2	1.08603	11.981		50.3955	10.8712	243.022
208994	96.2	1.08603	11.981		50.3955	10.8712	243.022
209194	96.2	1.08603	11.981		50.3955	10.8712	243.022
209394	96.2	1.08603	11.981		50.3955	10.8712	243.022
209594	96.2	1.08603	11.981		50.3955	10.8712	243.022
209794	94.1	1.09447	11.973		49.2953	10.9557	242.86
209994	94.1	1.09447	11.973		49.2953	10.9557	242.86
210194	96.68	1.09286	11.978		50.6469	10.9395	242.961
210394	96.68	1.09286	11.978		50.6469	10.9395	242.961
210594	96.68	1.09286	11.978		50.6469	10.9395	242.961
210794	96.68	1.09286	11.978		50.6469	10.9395	242.961
210994	96.68	1.09286	11.978		50.6469	10.9395	242.961
211194	94.44	1.10125	11.973		49.4735	11.0235	242.86
211394	94.44	1.10125	11.973		49.4735	11.0235	242.86
211594	97.1	1.09971	11.98		50.8669	11.0081	243.002
211794	97.1	1.09971	11.98		50.8669	11.0081	243.002
211994	97.1	1.09971	11.98		50.8669	11.0081	243.002
212194	97.1	1.09971	11.98		50.8669	11.0081	243.002
212394	97.1	1.09971	11.98		50.8669	11.0081	243.002
212594	94.92	1.10798	11.976		49.7249	11.0909	242.921
212794	94.92	1.10798	11.976		49.7249	11.0909	242.921
212994	97.6	1.10654	11.978		51.1289	11.0765	242.961
213194	97.6	1.10654	11.978		51.1289	11.0765	242.961
213394	97.6	1.10654	11.978		51.1289	11.0765	242.961
213594	97.6	1.10654	11.978		51.1289	11.0765	242.961
213794	97.6	1.10654	11.978		51.1289	11.0765	242.961
213994	95.54	1.11476	11.972		50.0497	11.1588	242.84
214194	95.54	1.11476	11.972		50.0497	11.1588	242.84
214394	98.18	1.11344	11.979		51.4327	11.1455	242.982
214594	98.18	1.11344	11.979		51.4327	11.1455	242.982
214794	98.18	1.11344	11.979		51.4327	11.1455	242.982
214994	98.18	1.11344	11.979		51.4327	11.1455	242.982
215194	98.18	1.11344	11.979		51.4327	11.1455	242.982
215394	95.74	1.12159	11.974		50.1545	11.2271	242.88
215594	95.74	1.12159	11.974		50.1545	11.2271	242.88
215794	98.52	1.12022	11.974		51.6108	11.2134	242.88
215994	98.52	1.12022	11.974		51.6108	11.2134	242.88
216194	98.52	1.12022	11.974		51.6108	11.2134	242.88
216394	98.52	1.12022	11.974		51.6108	11.2134	242.88
216594	98.52	1.12022	11.974		51.6108	11.2134	242.88
216794	96.3	1.1287	11.972		50.4478	11.2983	242.84
216994	96.3	1.1287	11.972		50.4478	11.2983	242.84
217194	99.16	1.12689	11.974		51.9461	11.2802	242.88
217394	99.16	1.12689	11.974		51.9461	11.2802	242.88
217594	99.16	1.12689	11.974		51.9461	11.2802	242.88
217794	99.16	1.12689	11.974		51.9461	11.2802	242.88
217994	99.16	1.12689	11.974		51.9461	11.2802	242.88
218194	96.32	1.13559	11.974		50.4583	11.3673	242.88
218394	96.32	1.13559	11.974		50.4583	11.3673	242.88
218594	100.02	1.13369	11.98		52.3966	11.3482	243.002
218794	100.04	1.13749	11.972		52.4071	11.3863	242.84
218994	100.04	1.13749	11.972		52.4071	11.3863	242.84
219194	100.04	1.13749	11.972		52.4071	11.3863	242.84
219394	100.04	1.13749	11.972		52.4071	11.3863	242.84
219594	96.42	1.14225	11.977		50.5107	11.4339	242.941
219794	96.48	1.14163	11.978		50.5421	11.4277	242.961
219994	96.48	1.14163	11.978		50.5421	11.4277	242.961
220194	96.48	1.14163	11.978		50.5421	11.4277	242.961
220394	96.02	1.14529	11.979		50.3012	11.4644	242.982
220594	99.26	1.14416	11.979		51.9985	11.4531	242.982
220794	99.26	1.14416	11.979		51.9985	11.4531	242.982
220994	99.26	1.14416	11.979		51.9985	11.4531	242.982
221194	99.26	1.14416	11.979		51.9985	11.4531	242.982
221394	99.26	1.14416	11.979		51.9985	11.4531	242.982
221594	97.98	1.15181	11.975		51.3279	11.5296	242.901
221794	97.98	1.15181	11.975		51.3279	11.5296	242.901
221994	100.34	1.15068	11.979		52.5642	11.5183	242.982
222194	100.34	1.15068	11.979		52.5642	11.5183	242.982
222394	100.34	1.15068	11.979		52.5642	11.5183	242.982
222594	100.34	1.15068	11.979		52.5642	11.5183	242.982
222794	100.34	1.15068	11.979		52.5642	11.5183	242.982
222994	98.1	1.15857	11.974		51.3908	11.5973	242.88
223194	98.1	1.15857	11.974		51.3908	11.5973	242.88
223394	101.44	1.1572	11.979		53.1405	11.5836	242.982
223594	101.94	1.16102	11.974		53.4024	11.6218	242.88
223794	101.94	1.16102	11.974		53.4024	11.6218	242.88
223994	101.94	1.16102	11.974		53.4024	11.6218	242.88
224194	101.94	1.16102	11.974		53.4024	11.6218	242.88
224394	101.94	1.16102	11.974		53.4024	11.6218	242.88
224594	101.94	1.16102	11.974		53.4024	11.6218	242.88
224794	102.44	1.16355	11.978		53.6643	11.6471	242.961
224994	99.4	1.16861	11.976		52.0718	11.6978	242.921
225194	99.4	1.16861	11.976		52.0718	11.6978	242.921
225394	101.42	1.1673	11.978		53.13	11.6847	242.961
225594	101.42	1.1673	11.978		53.13	11.6847	242.961
225794	101.42	1.1673	11.978		53.13	11.6847	242.961
225994	101.42	1.1673	11.978		53.13	11.6847	242.961
226194	101.42	1.1673	11.978		53.13	11.6847	242.961
226394	99.2	1.17548	11.972		51.967	11.7666	242.84
226594	99.2	1.17548	11.972		51.967	11.7666	242.84
226794	102.6	1.17359	11.981		53.7482	11.7476	243.022
226994	102.6	1.17359	11.981		53.7482	11.7476	243.022
227194	102.6	1.17359	11.981		53.7482	11.7476	243.022
227394	102.6	1.17359	11.981		53.7482	11.7476	243.022
227594	102.6	1.17359	11.981		53.7482	11.7476	243.022
227794	99.2	1.18188	11.976		51.967	11.8306	242.921
227994	98.78	1.18183	11.98		51.747	11.8301	243.002
228194	98.78	1.18183	11.98		51.747	11.8301	243.002
228394	98.78	1.18183	11.98		51.747	11.8301	243.002
228594	98.56	1.1855	11.978		51.6318	11.8669	242.961
228794	101.44	1.1845	11.978		53.1405	11.8569	242.961
228994	101.44	1.1845	11.978		53.1405	11.8569	242.961
229194	99.64	1.18893	11.977		52.1975	11.9012	242.941
229394	99.54	1.18856	11.98		52.1451	11.8975	243.002
229594	103.56	1.18715	11.98		54.2511	11.8834	243.002
229794	103.16	1.19159	11.973		54.0415	11.9278	242.86
229994	103.16	1.19159	11.973		54.0415	11.9278	242.86
230194	103.16	1.19159	11.973		54.0415	11.9278	242.86
230394	103.16	1.19159	11.973		54.0415	11.9278	242.86
230594	100.18	1.19544	11.978		52.4804	11.9664	242.961
230794	100.04	1.19529	11.978		52.4071	11.9649	242.961
230994	100.04	1.19529	11.978		52.4071	11.9649	242.961
231194	100.04	1.19529	11.978		52.4071	11.9649	242.961
231394	100.04	1.19529	11.978		52.4071	11.9649	242.961
231594	103	1.19765	11.977		53.9577	11.9885	242.941
231794	103	1.19765	11.977		53.9577	11.9885	242.941
231994	103	1.19765	11.977		53.9577	11.9885	242.941
232194	103	1.19765	11.977		53.9577	11.9885	242.941
232394	103	1.19765	11.977		53.9577	11.9885	242.941
232594	102.08	1.20527	11.975		53.4758	12.0648	242.901
232794	102.08	1.20527	11.975		53.4758	12.0648	242.901
232994	103.8	1.20447	11.978		54.3768	12.0568	242.961
233194	103.8	1.20447	11.978		54.3768	12.0568	242.961
233394	103.8	1.20447	11.978		54.3768	12.0568	242.961
233594	103.8	1.20447	11.978		54.3768	12.0568	242.961
233794	103.8	1.20447	11.978		54.3768	12.0568	242.961
233994	101.56	1.21245	11.975		53.2033	12.1366	242.901
234194	101.56	1.21245	11.975		53.2033	12.1366	242.901
234394	104.62	1.21098	11.978		54.8064	12.1219	242.961
234594	104.62	1.21098	11.978		54.8064	12.1219	242.961
234794	104.62	1.21098	11.978		54.8064	12.1219	242.961
234994	104.62	1.21098	11.978		54.8064	12.1219	242.961
235194	104.62	1.21098	11.978		54.8064	12.1219	242.961
235394	101.7	1.21931	11.975		53.2767	12.2053	242.901
235594	101.7	1.21931	11.975		53.2767	12.2053	242.901
235794	105.18	1.21769	11.98		55.0997	12.1891	243.002
235994	105.18	1.21769	11.98		55.0997	12.1891	243.002
236194	105.18	1.21769	11.98		55.0997	12.1891	243.002
236394	105.18	1.21769	11.98		55.0997	12.1891	243.002
236594	105.18	1.21769	11.98		55.0997	12.1891	243.002
236794	102.22	1.22592	11.976		53.5491	12.2715	242.921
236994	102.22	1.22592	11.976		53.5491	12.2715	242.921
237194	102.22	1.22592	11.976		53.5491	12.2715	242.921
237394	102.22	1.22592	11.976		53.5491	12.2715	242.921
237594	102.22	1.22592	11.976		53.5491	12.2715	242.921
237794	104.26	1.22841	11.979		54.6178	12.2964	242.982
237994	104.26	1.22841	11.979		54.6178	12.2964	242.982
238194	102.26	1.23291	11.976		53.5701	12.3414	242.921
238394	102.22	1.23242	11.981		53.5491	12.3365	243.022
238594	102.22	1.23242	11.981		53.5491	12.3365	243.022
238794	102.22	1.23242	11.981		53.5491	12.3365	243.022
238994	102.22	1.23242	11.981		53.5491	12.3365	243.022
239194	104.94	1.23497	11.978		54.974	12.3621	242.961
239394	104.94	1.23497	11.978		54.974	12.3621	242.961
239594	102.54	1.23961	11.974		53.7167	12.4085	242.88
239794	102.78	1.23923	11.981		53.8425	12.4047	243.022
239994	102.78	1.23923	11.981		53.8425	12.4047	243.022
240194	102.78	1.23923	11.981		53.8425	12.4047	243.022
240394	102.78	1.23923	11.981		53.8425	12.4047	243.022
240594	105.94	1.24162	11.976		55.4979	12.4286	242.921
240794	105.94	1.24162	11.976		55.4979	12.4286	242.921
240994	102.96	1.24636	11.978		53.9368	12.4761	242.961
241194	103.4	1.24601	11.98		54.1673	12.4726	243.002
241394	103.4	1.24601	11.98		54.1673	12.4726	243.002
241594	103.4	1.24601	11.98		54.1673	12.4726	243.002
241794	103.4	1.24601	11.98		54.1673	12.4726	243.002
241994	106.48	1.24843	11.979		55.7807	12.4968	242.982
242194	106.48	1.24843	11.979		55.7807	12.4968	242.982
242394	106.48	1.24843	11.979		55.7807	12.4968	242.982
242594	106.48	1.24843	11.979		55.7807	12.4968	242.982
242794	106.48	1.24843	11.979		55.7807	12.4968	242.982
242994	104.84	1.25641	11.97		54.9216	12.5767	242.799
243194	104.84	1.25641	11.97		54.9216	12.5767	242.799
243394	106.9	1.25508	11.979		56.0008	12.5634	242.982
243594	106.9	1.25508	11.979		56.0008	12.5634	242.982
243794	106.9	1.25508	11.979		56.0008	12.5634	242.982
243994	106.9	1.25508	11.979		56.0008	12.5634	242.982
244194	106.9	1.25508	11.979		56.0008	12.5634	242.982
244394	105.06	1.26313	11.972		55.0369	12.6439	242.84
244594	105.06	1.26313	11.972		55.0369	12.6439	242.84
244794	108	1.2617	11.98		56.577	12.6296	243.002
244994	108	1.2617	11.98		56.577	12.6296	243.002
245194	108	1.2617	11.98		56.577	12.6296	243.002
245394	108	1.2617	11.98		56.577	12.6296	243.002
245594	108	1.2617	11.98		56.577	12.6296	243.002
245794	104.68	1.26986	11.973		54.8378	12.7113	242.86
245994	104.64	1.26958	11.978		54.8168	12.7085	242.961
246194	104.64	1.26958	11.978		54.8168	12.7085	242.961
246394	104.64	1.26958	11.978		54.8168	12.7085	242.961
246594	104.64	1.26958	11.978		54.8168	12.7085	242.961
246794	107.88	1.27184	11.979		56.5142	12.7311	242.982
246994	107.88	1.27184	11.979		56.5142	12.7311	242.982
247194	107.88	1.27184	11.979		56.5142	12.7311	242.982
247394	107.88	1.27184	11.979		56.5142	12.7311	242.982
247594	107.88	1.27184	11.979		56.5142	12.7311	242.982
247794	105.56	1.27985	11.978		55.2988	12.8113	242.961
247994	105.56	1.27985	11.978		55.2988	12.8113	242.961
248194	108.92	1.27828	11.979		57.059	12.7956	242.982
248394	108.92	1.27828	11.979		57.059	12.7956	242.982
248594	108.92	1.27828	11.979		57.059	12.7956	242.982
248794	108.92	1.27828	11.979		57.059	12.7956	242.982
248994	108.92	1.27828	11.979		57.059	12.7956	242.982
249194	105.66	1.28652	11.976		55.3512	12.8781	242.921
249394	105.34	1.28643	11.98		55.1835	12.8772	243.002
249594	105.34	1.28643	11.98		55.1835	12.8772	243.002
249794	105.34	1.28643	11.98		55.1835	12.8772	243.002
249994	105.34	1.28643	11.98		55.1835	12.8772	243.002
250194	108.92	1.28848	11.979		57.059	12.8977	242.982
250394	108.92	1.28848	11.979		57.059	12.8977	242.982
250594	108.92	1.28848	11.979		57.059	12.8977	242.982
250794	108.92	1.28848	11.979		57.059	12.8977	242.982
250994	108.92	1.28848	11.979		57.059	12.8977	242.982
251194	106.62	1.29648	11.975		55.8541	12.9778	242.901
251394	106.62	1.29648	11.975		55.8541	12.9778	242.901
251594	109.98	1.29491	11.981		57.6143	12.9621	243.022
251794	110.24	1.29872	11.975		57.7505	13.0002	242.901
251994	110.24	1.29872	11.975		57.7505	13.0002	242.901
252194	110.24	1.29872	11.975		57.7505	13.0002	242.901
252394	110.24	1.29872	11.975		57.7505	13.0002	242.901
252594	110.24	1.29872	11.975		57.7505	13.0002	242.901
252794	110.24	1.29872	11.975		57.7505	13.0002	242.901
252994	110.24	1.29872	11.975		57.7505	13.0002	242.901
253194	107.86	1.30615	11.972		56.5037	13.0746	242.84
253394	107.86	1.30615	11.972		56.5037	13.0746	242.84
253594	110.24	1.30502	11.977		57.7505	13.0633	242.941
253794	110.24	1.30502	11.977		57.7505	13.0633	242.941
253994	110.24	1.30502	11.977		57.7505	13.0633	242.941
254194	110.24	1.30502	11.977		57.7505	13.0633	242.941
254394	110.24	1.30502	11.977		57.7505	13.0633	242.941
254594	107.56	1.31285	11.978		56.3465	13.1416	242.961
254794	107.56	1.31285	11.978		56.3465	13.1416	242.961
254994	107.56	1.31285	11.978		56.3465	13.1416	242.961
255194	107.56	1.31285	11.978		56.3465	13.1416	242.961
255394	107.56	1.31285	11.978		56.3465	13.1416	242.961
255594	109.98	1.31511	11.98		57.6143	13.1643	243.002
255794	109.98	1.31511	11.98		57.6143	13.1643	243.002
255994	109.98	1.31511	11.98		57.6143	13.1643	243.002
256194	109.98	1.31511	11.98		57.6143	13.1643	243.002
256394	109.98	1.31511	11.98		57.6143	13.1643	243.002
256594	108.12	1.32306	11.973		56.6399	13.2438	242.86
256794	108.12	1.32306	11.973		56.6399	13.2438	242.86
256994	111.16	1.32149	11.976		58.2324	13.2281	242.921
257194	111.16	1.32149	11.976		58.2324	13.2281	242.921
257394	111.16	1.32149	11.976		58.2324	13.2281	242.921
257594	111.16	1.32149	11.976		58.2324	13.2281	242.921
257794	111.16	1.32149	11.976		58.2324	13.2281	242.921
257994	108.12	1.32976	11.975		56.6399	13.3109	242.901
258194	108.12	1.32976	11.975		56.6399	13.3109	242.901
258394	108.12	1.32976	11.975		56.6399	13.3109	242.901
258594	108.12	1.32976	11.975		56.6399	13.3109	242.901
258794	108.12	1.32976	11.975		56.6399	13.3109	242.901
258994	110.64	1.33198	11.978		57.96	13.3331	242.961
259194	110.64	1.33198	11.978		57.96	13.3331	242.961
259394	110.64	1.33198	11.978		57.96	13.3331	242.961
259594	110.64	1.33198	11.978		57.96	13.3331	242.961
259794	110.64	1.33198	11.978		57.96	13.3331	242.961
259994	109.46	1.33969	11.972		57.3419	13.4103	242.84
260194	109.46	1.33969	11.972		57.3419	13.4103	242.84
260394	111.86	1.33835	11.98		58.5991	13.3969	243.002
260594	111.86	1.33835	11.98		58.5991	13.3969	243.002
260794	111.86	1.33835	11.98		58.5991	13.3969	243.002
260994	111.86	1.33835	11.98		58.5991	13.3969	243.002
261194	111.86	1.33835	11.98		58.5991	13.3969	243.002
261394	109.08	1.34622	11.974		57.1428	13.4757	242.88
261594	109.08	1.34602	11.984		57.1428	13.4737	243.083
261794	109.08	1.34602	11.984		57.1428	13.4737	243.083
261994	109.08	1.34602	11.984		57.1428	13.4737	243.083
262194	109.08	1.34602	11.984		57.1428	13.4737	243.083
262394	112.62	1.34798	11.978		58.9973	13.4933	242.961
262594	112.62	1.34798	11.978		58.9973	13.4933	242.961
262794	112.62	1.34798	11.978		58.9973	13.4933	242.961
262994	112.62	1.34798	11.978		58.9973	13.4933	242.961
263194	112.62	1.34798	11.978		58.9973	13.4933	242.961
263394	109.36	1.35622	11.977		57.2895	13.5758	242.941
263594	109.44	1.3557	11.98		57.3314	13.5706	243.002
263794	109.44	1.3557	11.98		57.3314	13.5706	243.002
263994	109.44	1.3557	11.98		57.3314	13.5706	243.002
264194	109.44	1.3557	11.98		57.3314	13.5706	243.002
264394	112.46	1.35834	11.98		58.9134	13.597	243.002
264594	112.46	1.35834	11.98		58.9134	13.597	243.002
264794	112.46	1.35834	11.98		58.9134	13.597	243.002
264994	112.46	1.35834	11.98		58.9134	13.597	243.002
265194	112.46	1.35834	11.98		58.9134	13.597	243.002
265394	110.36	1.36637	11.975		57.8133	13.6774	242.901
265594	110.36	1.36637	11.975		57.8133	13.6774	242.901
265794	110.36	1.36637	11.975		57.8133	13.6774	242.901
265994	110.36	1.36637	11.975		57.8133	13.6774	242.901
266194	110.36	1.36637	11.975		57.8133	13.6774	242.901
266394	113	1.36795	11.979		59.1963	13.6932	242.982
266594	113	1.36795	11.979		59.1963	13.6932	242.982
266794	113	1.36795	11.979		59.1963	13.6932	242.982
266994	113	1.36795	11.979		59.1963	13.6932	242.982
267194	113	1.36795	11.979		59.1963	13.6932	242.982
267394	110.82	1.37591	11.974		58.0543	13.7729	242.88
267594	110.82	1.37591	11.974		58.0543	13.7729	242.88
267794	114.4	1.37436	11.98		59.9297	13.7574	243.002
267994	114.06	1.37818	11.973		59.7516	13.7956	242.86
268194	114.06	1.37818	11.973		59.7516	13.7956	242.86
268394	114.06	1.37818	11.973		59.7516	13.7956	242.86
268594	114.06	1.37818	11.973		59.7516	13.7956	242.86
268794	110.8	1.38242	11.976		58.0438	13.838	242.921
268994	111.3	1.38205	11.981		58.3058	13.8343	243.022
269194	111.3	1.38205	11.981		58.3058	13.8343	243.022
269394	111.58	1.38565	11.972		58.4524	13.8704	242.84
269594	111.58	1.38565	11.972		58.4524	13.8704	242.84
269794	114.62	1.38418	11.979		60.045	13.8557	242.982
269994	114.62	1.38418	11.979		60.045	13.8557	242.982
270194	114.62	1.38418	11.979		60.045	13.8557	242.982
270394	114.62	1.38418	11.979		60.045	13.8557	242.982
270594	114.62	1.38418	11.979		60.045	13.8557	242.982
270794	111.4	1.39251	11.977		58.3581	13.939	242.941
270994	111.4	1.39251	11.977		58.3581	13.939	242.941
271194	115.3	1.39095	11.978		60.4012	13.9234	242.961
271394	115.04	1.39474	11.974		60.265	13.9614	242.88
271594	115.04	1.39474	11.974		60.265	13.9614	242.88
271794	115.04	1.39474	11.974		60.265	13.9614	242.88
271994	115.04	1.39474	11.974		60.265	13.9614	242.88
272194	115.04	1.39474	11.974		60.265	13.9614	242.88
272394	115.04	1.39474	11.974		60.265	13.9614	242.88
272594	115.04	1.39474	11.974		60.265	13.9614	242.88
272794	112.3	1.4024	11.975		58.8296	14.038	242.901
272994	112.3	1.4024	11.975		58.8296	14.038	242.901
273194	115.42	1.4009	11.976		60.4641	14.023	242.921
273394	115.42	1.4009	11.976		60.4641	14.023	242.921
273594	115.42	1.4009	11.976		60.4641	14.023	242.921
273794	115.42	1.4009	11.976		60.4641	14.023	242.921
273994	115.42	1.4009	11.976		60.4641	14.023	242.921
274194	112.2	1.40923	11.976		58.7772	14.1064	242.921
274394	111.74	1.40899	11.978		58.5363	14.104	242.961
274594	111.74	1.40899	11.978		58.5363	14.104	242.961
274794	111.74	1.40899	11.978		58.5363	14.104	242.961
274994	111.48	1.41258	11.978		58.4001	14.1399	242.961
275194	114.5	1.41153	11.976		59.9821	14.1294	242.921
275394	114.5	1.41153	11.976		59.9821	14.1294	242.921
275594	114.5	1.41153	11.976		59.9821	14.1294	242.921
275794	114.5	1.41153	11.976		59.9821	14.1294	242.921
275994	114.5	1.41153	11.976		59.9821	14.1294	242.921
276194	113.58	1.41905	11.972		59.5002	14.2047	242.84
276394	113.58	1.41905	11.972		59.5002	14.2047	242.84
276594	116	1.4178	11.98		60.7679	14.1922	243.002
276794	116	1.4178	11.98		60.7679	14.1922	243.002
276994	116	1.4178	11.98		60.7679	14.1922	243.002
277194	116	1.4178	11.98		60.7679	14.1922	243.002
277394	116	1.4178	11.98		60.7679	14.1922	243.002
277594	112.9	1.42598	11.974		59.1439	14.2741	242.88
277794	112.44	1.42565	11.979		58.903	14.2708	242.982
277994	112.44	1.42565	11.979		58.903	14.2708	242.982
278194	112.44	1.42565	11.979		58.903	14.2708	242.982
278394	112.54	1.42911	11.979		58.9553	14.3054	242.982
278594	115.54	1.42816	11.978		60.5269	14.2959	242.961
278794	115.54	1.42816	11.978		60.5269	14.2959	242.961
278994	115.54	1.42816	11.978		60.5269	14.2959	242.961
279194	115.54	1.42816	11.978		60.5269	14.2959	242.961
279394	115.54	1.42816	11.978		60.5269	14.2959	242.961
279594	114.3	1.4356	11.973		59.8773	14.3704	242.86
279794	114.3	1.4356	11.973		59.8773	14.3704	242.86
279994	117.3	1.43415	11.976		61.4489	14.3559	242.921
280194	117.2	1.43798	11.974		61.3965	14.3942	242.88
280394	117.2	1.43798	11.974		61.3965	14.3942	242.88
280594	117.2	1.43798	11.974		61.3965	14.3942	242.88
280794	117.2	1.43798	11.974		61.3965	14.3942	242.88
280994	117.2	1.43798	11.974		61.3965	14.3942	242.88
281194	117.2	1.43798	11.974		61.3965	14.3942	242.88
281394	117.2	1.43798	11.974		61.3965	14.3942	242.88
281594	114.78	1.44543	11.974		60.1288	14.4688	242.88
281794	114.78	1.44543	11.974		60.1288	14.4688	242.88
281994	117.62	1.44413	11.98		61.6166	14.4558	243.002
282194	117.62	1.44413	11.98		61.6166	14.4558	243.002
282394	117.62	1.44413	11.98		61.6166	14.4558	243.002
282594	117.62	1.44413	11.98		61.6166	14.4558	243.002
282794	117.62	1.44413	11.98		61.6166	14.4558	243.002
282994	114.34	1.45248	11.977		59.8983	14.5393	242.941
283194	114.34	1.45248	11.977		59.8983	14.5393	242.941
283394	114.34	1.45248	11.977		59.8983	14.5393	242.941
283594	114.34	1.45248	11.977		59.8983	14.5393	242.941
283794	114.34	1.45248	11.977		59.8983	14.5393	242.941
283994	116.76	1.45453	11.98		61.166	14.5599	243.002
284194	116.76	1.45453	11.98		61.166	14.5599	243.002
284394	116.76	1.45453	11.98		61.166	14.5599	243.002
284594	116.76	1.45453	11.98		61.166	14.5599	243.002
284794	116.76	1.45453	11.98		61.166	14.5599	243.002
284994	115.44	1.4624	11.971		60.4745	14.6386	242.819
285194	115.44	1.4624	11.971		60.4745	14.6386	242.819
285394	118.06	1.46088	11.982		61.8471	14.6234	243.043
285594	118.06	1.46088	11.982		61.8471	14.6234	243.043
285794	118.06	1.46088	11.982		61.8471	14.6234	243.043
285994	118.06	1.46088	11.982		61.8471	14.6234	243.043
286194	118.06	1.46088	11.982		61.8471	14.6234	243.043
286394	114.9	1.46918	11.977		60.1917	14.7065	242.941
286594	114.9	1.46879	11.977		60.1917	14.7026	242.941
286794	114.9	1.46879	11.977		60.1917	14.7026	242.941
286994	114.9	1.46879	11.977		60.1917	14.7026	242.941
287194	114.5	1.47243	11.977		59.9821	14.739	242.941
287394	117.78	1.47128	11.978		61.7004	14.7275	242.961
287594	117.78	1.47128	11.978		61.7004	14.7275	242.961
287794	117.78	1.47128	11.978		61.7004	14.7275	242.961
287994	117.78	1.47128	11.978		61.7004	14.7275	242.961
288194	117.78	1.47128	11.978		61.7004	14.7275	242.961
288394	115.66	1.47892	11.972		60.5898	14.804	242.84
288594	115.66	1.47892	11.972		60.5898	14.804	242.84
288794	115.66	1.47892	11.972		60.5898	14.804	242.84
288994	115.66	1.47892	11.972		60.5898	14.804	242.84
289194	115.66	1.47892	11.972		60.5898	14.804	242.84
289394	117.8	1.48137	11.976		61.7109	14.8285	242.921
289594	117.8	1.48137	11.976		61.7109	14.8285	242.921
289794	115.74	1.48559	11.977		60.6317	14.8708	242.941
289994	116.24	1.48522	11.981		60.8936	14.8671	243.022
290194	116.24	1.48522	11.981		60.8936	14.8671	243.022
290394	116.66	1.48887	11.972		61.1137	14.9036	242.84
290594	116.66	1.48887	11.972		61.1137	14.9036	242.84
290794	119.5	1.48747	11.978		62.6014	14.8896	242.961
290994	119.5	1.48747	11.978		62.6014	14.8896	242.961
291194	119.5	1.48747	11.978		62.6014	14.8896	242.961
291394	119.5	1.48747	11.978		62.6014	14.8896	242.961
291594	119.5	1.48747	11.978		62.6014	14.8896	242.961
291794	116.18	1.49574	11.98		60.8622	14.9724	243.002
291994	116.2	1.49533	11.98		60.8727	14.9683	243.002
292194	116.2	1.49533	11.98		60.8727	14.9683	243.002
292394	116.2	1.49533	11.98		60.8727	14.9683	243.002
292594	115.92	1.49863	11.981		60.726	15.0013	243.022
292794	119.66	1.49742	11.979		62.6852	14.9892	242.982
292994	119.66	1.49742	11.979		62.6852	14.9892	242.982
293194	119.66	1.49742	11.979		62.6852	14.9892	242.982
293394	119.66	1.49742	11.979		62.6852	14.9892	242.982
293594	119.66	1.49742	11.979		62.6852	14.9892	242.982
293794	119.66	1.49742	11.979		62.6852	14.9892	242.982
293994	119.66	1.49742	11.979		62.6852	14.9892	242.982
294194	119.66	1.49742	11.979		62.6852	14.9892	242.982
294394	117.38	1.50862	11.975		61.4908	15.1013	242.901
294594	117.38	1.50862	11.975		61.4908	15.1013	242.901
294794	120.46	1.50704	11.982		63.1043	15.0855	243.043
294994	120.46	1.50704	11.982		63.1043	15.0855	243.043
295194	120.46	1.50704	11.982		63.1043	15.0855	243.043
295394	120.46	1.50704	11.982		63.1043	15.0855	243.043
295594	120.46	1.50704	11.982		63.1043	15.0855	243.043
295794	116.84	1.51541	11.979		61.2079	15.1693	242.982
295994	117.26	1.51486	11.98		61.428	15.1638	243.002
296194	117.26	1.51486	11.98		61.428	15.1638	243.002
296394	117.26	1.51486	11.98		61.428	15.1638	243.002
296594	117.26	1.51486	11.98		61.428	15.1638	243.002
296794	120.7	1.51696	11.978		63.2301	15.1848	242.961
296994	120.7	1.51696	11.978		63.2301	15.1848	242.961
297194	120.7	1.51696	11.978		63.2301	15.1848	242.961
297394	120.7	1.51696	11.978		63.2301	15.1848	242.961
297594	120.7	1.51696	11.978		63.2301	15.1848	242.961
297794	117.56	1.52505	11.974		61.5851	15.2658	242.88
297994	117.26	1.52486	11.979		61.428	15.2639	242.982
298194	117.26	1.52486	11.979		61.428	15.2639	242.982
298394	117.26	1.52486	11.979		61.428	15.2639	242.982
298594	116.78	1.52853	11.979		61.1765	15.3006	242.982
298794	120.5	1.52722	11.978		63.1253	15.2875	242.961
298994	120.5	1.52722	11.978		63.1253	15.2875	242.961
299194	120.5	1.52722	11.978		63.1253	15.2875	242.961
299394	120.5	1.52722	11.978		63.1253	15.2875	242.961
299594	120.5	1.52722	11.978		63.1253	15.2875	242.961
299794	118.18	1.53484	11.978		61.9099	15.3638	242.961
299994	118.18	1.53484	11.978		61.9099	15.3638	242.961
300194	118.18	1.53484	11.978		61.9099	15.3638	242.961
300394	118.18	1.53484	11.978		61.9099	15.3638	242.961
300594	118.18	1.53484	11.978		61.9099	15.3638	242.961
300794	121.18	1.53689	11.978		63.4815	15.3843	242.961
300994	121.18	1.53689	11.978		63.4815	15.3843	242.961
301194	121.18	1.53689	11.978		63.4815	15.3843	242.961
301394	121.18	1.53689	11.978		63.4815	15.3843	242.961
301594	121.18	1.53689	11.978		63.4815	15.3843	242.961
301794	118.68	1.54466	11.974		62.1719	15.4621	242.88
301994	118.68	1.54466	11.974		62.1719	15.4621	242.88
302194	118.68	1.54466	11.974		62.1719	15.4621	242.88
302394	118.68	1.54466	11.974		62.1719	15.4621	242.88
302594	118.68	1.54466	11.974		62.1719	15.4621	242.88
302794	121.56	1.54675	11.98		63.6806	15.483	243.002
302994	121.56	1.54675	11.98		63.6806	15.483	243.002
303194	121.56	1.54675	11.98		63.6806	15.483	243.002
303394	121.56	1.54675	11.98		63.6806	15.483	243.002
303594	121.56	1.54675	11.98		63.6806	15.483	243.002
303794	118.86	1.5548	11.975		62.2661	15.5636	242.901
303994	118.86	1.5548	11.975		62.2661	15.5636	242.901
304194	118.86	1.5548	11.975		62.2661	15.5636	242.901
304394	118.86	1.5548	11.975		62.2661	15.5636	242.901
304594	118.86	1.5548	11.975		62.2661	15.5636	242.901
304794	121.78	1.55668	11.98		63.7958	15.5824	243.002
304994	121.78	1.55668	11.98		63.7958	15.5824	243.002
305194	121.78	1.55668	11.98		63.7958	15.5824	243.002
305394	121.78	1.55668	11.98		63.7958	15.5824	243.002
305594	121.78	1.55668	11.98		63.7958	15.5824	243.002
305794	119.2	1.56458	11.978		62.4443	15.6615	242.961
305994	119.2	1.56458	11.978		62.4443	15.6615	242.961
306194	119.2	1.56458	11.978		62.4443	15.6615	242.961
306394	119.2	1.56458	11.978		62.4443	15.6615	242.961
306594	119.2	1.56458	11.978		62.4443	15.6615	242.961
306794	121.6	1.56674	11.984		63.7015	15.6831	243.083
306994	121.6	1.56674	11.984		63.7015	15.6831	243.083
307194	121.6	1.56674	11.984		63.7015	15.6831	243.083
307394	121.6	1.56674	11.984		63.7015	15.6831	243.083
307594	121.6	1.56674	11.984		63.7015	15.6831	243.083
307794	119.94	1.57442	11.974		62.8319	15.76	242.88
307994	119.94	1.57442	11.974		62.8319	15.76	242.88
308194	119.94	1.57442	11.974		62.8319	15.76	242.88
308394	119.94	1.57442	11.974		62.8319	15.76	242.88
308594	119.94	1.57442	11.974		62.8319	15.76	242.88
308794	122.46	1.57654	11.98		64.152	15.7812	243.002
308994	122.46	1.57654	11.98		64.152	15.7812	243.002
309194	122.46	1.57654	11.98		64.152	15.7812	243.002
309394	122.46	1.57654	11.98		64.152	15.7812	243.002
309594	122.46	1.57654	11.98		64.152	15.7812	243.002
309794	120.02	1.58439	11.976		62.8738	15.8598	242.921
309994	120.02	1.58439	11.976		62.8738	15.8598	242.921
310194	120.02	1.58439	11.976		62.8738	15.8598	242.921
310394	120.02	1.58439	11.976		62.8738	15.8598	242.921
310594	119.56	1.58755	11.979		62.6329	15.8914	242.982
310794	122.72	1.58635	11.978		64.2883	15.8794	242.961
310994	122.72	1.58635	11.978		64.2883	15.8794	242.961
311194	122.72	1.58635	11.978		64.2883	15.8794	242.961
311394	122.72	1.58635	11.978		64.2883	15.8794	242.961
311594	122.72	1.58635	11.978		64.2883	15.8794	242.961
311794	120.36	1.59417	11.978		63.0519	15.9577	242.961
311994	119.88	1.59394	11.979		62.8005	15.9554	242.982
312194	119.88	1.59394	11.979		62.8005	15.9554	242.982
312394	119.88	1.59394	11.979		62.8005	15.9554	242.982
312594	119.5	1.59757	11.98		62.6014	15.9917	243.002
312794	123.24	1.59607	11.979		64.5607	15.9767	242.982
312994	123.24	1.59607	11.979		64.5607	15.9767	242.982
313194	123.24	1.59607	11.979		64.5607	15.9767	242.982
313394	123.24	1.59607	11.979		64.5607	15.9767	242.982
313594	123.24	1.59607	11.979		64.5607	15.9767	242.982
313794	120.92	1.60408	11.976		63.3453	16.0569	242.921
313994	120.92	1.60408	11.976		63.3453	16.0569	242.921
314194	120.92	1.60408	11.976		63.3453	16.0569	242.921
314394	120.92	1.60408	11.976		63.3453	16.0569	242.921
314594	120.92	1.60408	11.976		63.3453	16.0569	242.921
314794	123.38	1.60602	11.979		64.634	16.0763	242.982
314994	123.38	1.60602	11.979		64.634	16.0763	242.982
315194	123.38	1.60602	11.979		64.634	16.0763	242.982
315394	123.38	1.60602	11.979		64.634	16.0763	242.982
315594	123.38	1.60602	11.979		64.634	16.0763	242.982
315794	121.12	1.61391	11.974		63.4501	16.1553	242.88
315994	121.12	1.61391	11.974		63.4501	16.1553	242.88
316194	121.12	1.61391	11.974		63.4501	16.1553	242.88
316394	121.12	1.61391	11.974		63.4501	16.1553	242.88
316594	121.12	1.61391	11.974		63.4501	16.1553	242.88
316794	123.64	1.61593	11.976		64.7702	16.1755	242.921
316994	123.64	1.61593	11.976		64.7702	16.1755	242.921
317194	123.64	1.61593	11.976		64.7702	16.1755	242.921
317394	123.64	1.61593	11.976		64.7702	16.1755	242.921
317594	123.64	1.61593	11.976		64.7702	16.1755	242.921
317794	121.48	1.62378	11.974		63.6387	16.2541	242.88
317994	121.48	1.62378	11.974		63.6387	16.2541	242.88
318194	125.2	1.62218	11.978		65.5874	16.238	242.961
318394	124.84	1.62611	11.973		65.3988	16.2774	242.86
318594	124.84	1.62611	11.973		65.3988	16.2774	242.86
318794	124.84	1.62611	11.973		65.3988	16.2774	242.86
318994	124.84	1.62611	11.973		65.3988	16.2774	242.86
319194	124.84	1.62611	11.973		65.3988	16.2774	242.86
319394	124.84	1.62611	11.973		65.3988	16.2774	242.86
319594	124.84	1.62611	11.973		65.3988	16.2774	242.86
319794	121.86	1.63365	11.976		63.8377	16.3529	242.921
319994	121.86	1.63365	11.976		63.8377	16.3529	242.921
320194	121.86	1.63365	11.976		63.8377	16.3529	242.921
320394	121.86	1.63365	11.976		63.8377	16.3529	242.921
320594	121.86	1.63365	11.976		63.8377	16.3529	242.921
320794	124.56	1.6357	11.979		65.2522	16.3734	242.982
320994	124.56	1.6357	11.979		65.2522	16.3734	242.982
321194	124.56	1.6357	11.979		65.2522	16.3734	242.982
321394	124.56	1.6357	11.979		65.2522	16.3734	242.982
321594	124.56	1.6357	11.979		65.2522	16.3734	242.982
321794	122.08	1.64357	11.974		63.953	16.4522	242.88
321994	122.08	1.64357	11.974		63.953	16.4522	242.88
322194	122.08	1.64357	11.974		63.953	16.4522	242.88
322394	122.08	1.64357	11.974		63.953	16.4522	242.88
322594	122.08	1.64357	11.974		63.953	16.4522	242.88
322794	124.74	1.64554	11.982		65.3465	16.4719	243.043
322994	124.74	1.64554	11.982		65.3465	16.4719	243.043
323194	124.74	1.64554	11.982		65.3465	16.4719	243.043
323394	124.74	1.64554	11.982		65.3465	16.4719	243.043
323594	124.74	1.64554	11.982		65.3465	16.4719	243.043
323794	122.16	1.65344	11.976		63.9949	16.551	242.921
323994	122.22	1.65292	11.978		64.0263	16.5457	242.961
324194	122.22	1.65292	11.978		64.0263	16.5457	242.961
324394	122.22	1.65292	11.978		64.0263	16.5457	242.961
324594	121.9	1.65644	11.982		63.8587	16.581	243.043
324794	125.78	1.65498	11.98		65.8913	16.5664	243.002
324994	125.78	1.65498	11.98		65.8913	16.5664	243.002
325194	125.78	1.65498	11.98		65.8913	16.5664	243.002
325394	125.78	1.65498	11.98		65.8913	16.5664	243.002
325594	125.78	1.65498	11.98		65.8913	16.5664	243.002
325794	125.78	1.65498	11.98		65.8913	16.5664	243.002
325994	125.78	1.65498	11.98		65.8913	16.5664	243.002
326194	125.78	1.65498	11.98		65.8913	16.5664	243.002
326394	122.86	1.6662	11.973		64.3616	16.6787	242.86
326594	122.86	1.6662	11.973		64.3616	16.6787	242.86
326794	122.86	1.6662	11.973		64.3616	16.6787	242.86
326994	122.86	1.6662	11.973		64.3616	16.6787	242.86
327194	122.86	1.6662	11.973		64.3616	16.6787	242.86
327394	125.74	1.66809	11.978		65.8703	16.6976	242.961
327594	125.74	1.66809	11.978		65.8703	16.6976	242.961
327794	125.74	1.66809	11.978		65.8703	16.6976	242.961
327994	125.74	1.66809	11.978		65.8703	16.6976	242.961
328194	125.74	1.66809	11.978		65.8703	16.6976	242.961
328394	123.1	1.67592	11.978		64.4873	16.776	242.961
328594	123.02	1.67554	11.98		64.4454	16.7722	243.002
328794	123.02	1.67554	11.98		64.4454	16.7722	243.002
328994	123.02	1.67554	11.98		64.4454	16.7722	243.002
329194	122.56	1.6792	11.98		64.2044	16.8088	243.002
329394	126.68	1.67776	11.978		66.3627	16.7944	242.961
329594	126.68	1.67776	11.978		66.3627	16.7944	242.961
329794	126.68	1.67776	11.978		66.3627	16.7944	242.961
329994	126.68	1.67776	11.978		66.3627	16.7944	242.961
330194	126.68	1.67776	11.978		66.3627	16.7944	242.961
330394	126.68	1.67776	11.978		66.3627	16.7944	242.961
330594	126.68	1.67776	11.978		66.3627	16.7944	242.961
330794	126.68	1.67776	11.978		66.3627	16.7944	242.961
330994	123.94	1.68862	11.974		64.9274	16.9031	242.88
331194	123.94	1.68862	11.974		64.9274	16.9031	242.88
331394	123.94	1.68862	11.974		64.9274	16.9031	242.88
331594	123.94	1.68862	11.974		64.9274	16.9031	242.88
331794	123.94	1.68862	11.974		64.9274	16.9031	242.88
331994	123.94	1.68862	11.974		64.9274	16.9031	242.88
332194	123.94	1.68862	11.974		64.9274	16.9031	242.88
332394	123.94	1.68862	11.974		64.9274	16.9031	242.88
332594	126.62	1.69378	11.977		66.3313	16.9548	242.941
332794	126.62	1.69378	11.977		66.3313	16.9548	242.941
332994	126.62	1.69378	11.977		66.3313	16.9548	242.941
333194	126.62	1.69378	11.977		66.3313	16.9548	242.941
333394	126.62	1.69378	11.977		66.3313	16.9548	242.941
333594	123.54	1.70146	11.978		64.7178	17.0316	242.961
333794	124.02	1.70119	11.977		64.9693	17.0289	242.941
333994	124.02	1.70119	11.977		64.9693	17.0289	242.941
334194	124.28	1.7047	11.975		65.1055	17.0641	242.901
334394	124.28	1.7047	11.975		65.1055	17.0641	242.901
334594	124.28	1.7047	11.975		65.1055	17.0641	242.901
334794	124.28	1.7047	11.975		65.1055	17.0641	242.901
334994	124.28	1.7047	11.975		65.1055	17.0641	242.901
335194	127.26	1.70656	11.982		66.6666	17.0827	243.043
335394	127.26	1.70656	11.982		66.6666	17.0827	243.043
335594	127.26	1.70656	11.982		66.6666	17.0827	243.043
335794	127.26	1.70656	11.982		66.6666	17.0827	243.043
335994	127.26	1.70656	11.982		66.6666	17.0827	243.043
336194	124.08	1.71437	11.975		65.0007	17.1609	242.901
336394	124.34	1.71398	11.98		65.1369	17.157	243.002
336594	124.34	1.71398	11.98		65.1369	17.157	243.002
336794	124.58	1.7177	11.975		65.2626	17.1942	242.901
336994	124.58	1.7177	11.975		65.2626	17.1942	242.901
337194	124.58	1.7177	11.975		65.2626	17.1942	242.901
337394	124.58	1.7177	11.975		65.2626	17.1942	242.901
337594	124.58	1.7177	11.975		65.2626	17.1942	242.901
337794	127	1.71955	11.976		66.5304	17.2127	242.921
337994	127	1.71955	11.976		66.5304	17.2127	242.921
338194	127	1.71955	11.976		66.5304	17.2127	242.921
338394	127	1.71955	11.976		66.5304	17.2127	242.921
338594	127	1.71955	11.976		66.5304	17.2127	242.921
338794	124.24	1.72742	11.975		65.0845	17.2915	242.901
338994	124.6	1.72689	11.975		65.2731	17.2862	242.901
339194	124.6	1.72689	11.975		65.2731	17.2862	242.901
339394	125.04	1.73064	11.974		65.5036	17.3237	242.88
339594	125.04	1.73064	11.974		65.5036	17.3237	242.88
339794	128.54	1.72901	11.979		67.3371	17.3074	242.982
339994	128.12	1.73276	11.977		67.1171	17.3449	242.941
340194	128.12	1.73276	11.977		67.1171	17.3449	242.941
340394	128.12	1.73276	11.977		67.1171	17.3449	242.941
340594	128.12	1.73276	11.977		67.1171	17.3449	242.941
340794	128.12	1.73276	11.977		67.1171	17.3449	242.941
340994	128.12	1.73276	11.977		67.1171	17.3449	242.941
341194	128.12	1.73276	11.977		67.1171	17.3449	242.941
341394	124.9	1.74009	11.976		65.4303	17.4183	242.921
341594	125.36	1.73962	11.98		65.6712	17.4136	243.002
341794	125.36	1.73962	11.98		65.6712	17.4136	243.002
341994	125.4	1.74331	11.976		65.6922	17.4506	242.921
342194	125.4	1.74331	11.976		65.6922	17.4506	242.921
342394	125.4	1.74331	11.976		65.6922	17.4506	242.921
342594	125.4	1.74331	11.976		65.6922	17.4506	242.921
342794	125.4	1.74331	11.976		65.6922	17.4506	242.921
342994	128.44	1.74505	11.98		67.2847	17.468	243.002
343194	128.44	1.74505	11.98		67.2847	17.468	243.002
343394	128.44	1.74505	11.98		67.2847	17.468	243.002
343594	128.44	1.74505	11.98		67.2847	17.468	243.002
343794	128.44	1.74505	11.98		67.2847	17.468	243.002
343994	128.44	1.74505	11.98		67.2847	17.468	243.002
344194	128.44	1.74505	11.98		67.2847	17.468	243.002
344394	128.44	1.74505	11.98		67.2847	17.468	243.002
344594	128.44	1.74505	11.98		67.2847	17.468	243.002
344794	128.44	1.74505	11.98		67.2847	17.468	243.002
344994	128.44	1.74505	11.98		67.2847	17.468	243.002
345194	125.82	1.75916	11.977		65.9122	17.6092	242.941
345394	125.82	1.75916	11.977		65.9122	17.6092	242.941
345594	125.82	1.75916	11.977		65.9122	17.6092	242.941
345794	125.82	1.75916	11.977		65.9122	17.6092	242.941
345994	125.82	1.75916	11.977		65.9122	17.6092	242.941
346194	128.32	1.76109	11.978		67.2219	17.6285	242.961
346394	128.32	1.76109	11.978		67.2219	17.6285	242.961
346594	128.32	1.76109	11.978		67.2219	17.6285	242.961
346794	128.32	1.76109	11.978		67.2219	17.6285	242.961
346994	128.32	1.76109	11.978		67.2219	17.6285	242.961
347194	128.32	1.76109	11.978		67.2219	17.6285	242.961
347394	128.32	1.76109	11.978		67.2219	17.6285	242.961
347594	128.32	1.76109	11.978		67.2219	17.6285	242.961
347794	125.78	1.77188	11.975		65.8913	17.7365	242.901
347994	125.38	1.77182	11.982		65.6817	17.7359	243.043
348194	125.38	1.77182	11.982		65.6817	17.7359	243.043
348394	125.38	1.77182	11.982		65.6817	17.7359	243.043
348594	125.32	1.77514	11.978		65.6503	17.7692	242.961
348794	129.3	1.77375	11.981		67.7353	17.7553	243.022
348994	129.3	1.77375	11.981		67.7353	17.7553	243.022
349194	129.3	1.77375	11.981		67.7353	17.7553	243.022
349394	129.3	1.77375	11.981		67.7353	17.7553	243.022
349594	129.3	1.77375	11.981		67.7353	17.7553	243.022
349794	129.3	1.77375	11.981		67.7353	17.7553	243.022
349994	129.3	1.77375	11.981		67.7353	17.7553	243.022
350194	129.3	1.77375	11.981		67.7353	17.7553	243.022
350394	125.76	1.78478	11.979		65.8808	17.8657	242.982
350594	126.1	1.78437	11.981		66.0589	17.8616	243.022
350794	126.1	1.78437	11.981		66.0589	17.8616	243.022
350994	126.1	1.78437	11.981		66.0589	17.8616	243.022
351194	126.1	1.78437	11.981		66.0589	17.8616	243.022
351394	126.1	1.78437	11.981		66.0589	17.8616	243.022
351594	126.1	1.78437	11.981		66.0589	17.8616	243.022
351794	126.1	1.78437	11.981		66.0589	17.8616	243.022
351994	128.8	1.79002	11.977		67.4733	17.9181	242.941
352194	128.8	1.79002	11.977		67.4733	17.9181	242.941
352394	128.8	1.79002	11.977		67.4733	17.9181	242.941
352594	128.8	1.79002	11.977		67.4733	17.9181	242.941
352794	128.8	1.79002	11.977		67.4733	17.9181	242.941
352994	126.52	1.79772	11.975		66.2789	17.9952	242.901
353194	126.52	1.79772	11.975		66.2789	17.9952	242.901
353394	126.52	1.79772	11.975		66.2789	17.9952	242.901
353594	126.52	1.79772	11.975		66.2789	17.9952	242.901
353794	126.52	1.79772	11.975		66.2789	17.9952	242.901
353994	129.9	1.79964	11.982		68.0496	18.0144	243.043
354194	129.9	1.79964	11.982		68.0496	18.0144	243.043
354394	129.9	1.79964	11.982		68.0496	18.0144	243.043
354594	129.9	1.79964	11.982		68.0496	18.0144	243.043
354794	129.9	1.79964	11.982		68.0496	18.0144	243.043
354994	129.9	1.79964	11.982		68.0496	18.0144	243.043
355194	129.9	1.79964	11.982		68.0496	18.0144	243.043
355394	129.9	1.79964	11.982		68.0496	18.0144	243.043
355594	126.92	1.81068	11.973		66.4885	18.1249	242.86
355794	126.92	1.81068	11.973		66.4885	18.1249	242.86
355994	126.92	1.81068	11.973		66.4885	18.1249	242.86
356194	126.92	1.81068	11.973		66.4885	18.1249	242.86
356394	126.92	1.81068	11.973		66.4885	18.1249	242.86
356594	129.76	1.81258	11.979		67.9762	18.1439	242.982
356794	129.76	1.81258	11.979		67.9762	18.1439	242.982
356994	129.76	1.81258	11.979		67.9762	18.1439	242.982
357194	129.76	1.81258	11.979		67.9762	18.1439	242.982
357394	129.76	1.81258	11.979		67.9762	18.1439	242.982
357594	129.76	1.81258	11.979		67.9762	18.1439	242.982
357794	129.76	1.81258	11.979		67.9762	18.1439	242.982
357994	129.76	1.81258	11.979		67.9762	18.1439	242.982
358194	127.34	1.82343	11.975		66.7085	18.2526	242.901
358394	127.34	1.82343	11.975		66.7085	18.2526	242.901
358594	130.74	1.82204	11.98		68.4896	18.2386	243.002
358794	130.68	1.82586	11.973		68.4582	18.2769	242.86
358994	130.68	1.82586	11.973		68.4582	18.2769	242.86
359194	130.68	1.82586	11.973		68.4582	18.2769	242.86
359394	130.68	1.82586	11.973		68.4582	18.2769	242.86
359594	130.68	1.82586	11.973		68.4582	18.2769	242.86
359794	130.68	1.82586	11.973		68.4582	18.2769	242.86
359994	130.68	1.82586	11.973		68.4582	18.2769	242.86
360194	127.12	1.83371	11.974		66.5932	18.3555	242.88
360394	127.12	1.83371	11.974		66.5932	18.3555	242.88
360594	127.12	1.83371	11.974		66.5932	18.3555	242.88
360794	127.12	1.83371	11.974		66.5932	18.3555	242.88
360994	127.12	1.83371	11.974		66.5932	18.3555	242.88
361194	129.8	1.83557	11.98		67.9972	18.3741	243.002
361394	129.8	1.83557	11.98		67.9972	18.3741	243.002
361594	129.8	1.83557	11.98		67.9972	18.3741	243.002
361794	129.8	1.83557	11.98		67.9972	18.3741	243.002
361994	129.8	1.83557	11.98		67.9972	18.3741	243.002
362194	127.28	1.84335	11.976		66.6771	18.452	242.921
362394	127.2	1.84288	11.978		66.6352	18.4472	242.961
362594	127.2	1.84288	11.978		66.6352	18.4472	242.961
362794	127.2	1.84288	11.978		66.6352	18.4472	242.961
362994	127.2	1.84288	11.978		66.6352	18.4472	242.961
363194	131.14	1.8449	11.979		68.6992	18.4675	242.982
363394	131.24	1.84867	11.976		68.7516	18.5052	242.921
363594	131.24	1.84867	11.976		68.7516	18.5052	242.921
363794	131.24	1.84867	11.976		68.7516	18.5052	242.921
363994	131.24	1.84867	11.976		68.7516	18.5052	242.921
364194	131.24	1.84867	11.976		68.7516	18.5052	242.921
364394	131.24	1.84867	11.976		68.7516	18.5052	242.921
364594	131.24	1.84867	11.976		68.7516	18.5052	242.921
364794	127.54	1.85636	11.974		66.8133	18.5822	242.88
364994	127.16	1.85599	11.981		66.6142	18.5785	243.022
365194	127.16	1.85599	11.981		66.6142	18.5785	243.022
365394	127.16	1.85599	11.981		66.6142	18.5785	243.022
365594	126.92	1.85948	11.977		66.4885	18.6134	242.941
365794	130.9	1.85809	11.98		68.5734	18.5995	243.002
365994	130.9	1.85809	11.98		68.5734	18.5995	243.002
366194	130.9	1.85809	11.98		68.5734	18.5995	243.002
366394	130.9	1.85809	11.98		68.5734	18.5995	243.002
366594	130.9	1.85809	11.98		68.5734	18.5995	243.002
366794	130.9	1.85809	11.98		68.5734	18.5995	243.002
366994	130.9	1.85809	11.98		68.5734	18.5995	243.002
367194	130.9	1.85809	11.98		68.5734	18.5995	243.002
367394	127.9	1.86924	11.972		67.0019	18.7111	242.84
367594	127.9	1.86924	11.972		67.0019	18.7111	242.84
367794	127.9	1.86924	11.972		67.0019	18.7111	242.84
367994	127.9	1.86924	11.972		67.0019	18.7111	242.84
368194	127.9	1.86924	11.972		67.0019	18.7111	242.84
368394	130.44	1.87135	11.98		68.3325	18.7322	243.002
368594	130.44	1.87135	11.98		68.3325	18.7322	243.002
368794	130.44	1.87135	11.98		68.3325	18.7322	243.002
368994	130.44	1.87135	11.98		68.3325	18.7322	243.002
369194	130.44	1.87135	11.98		68.3325	18.7322	243.002
369394	130.44	1.87135	11.98		68.3325	18.7322	243.002
369594	130.44	1.87135	11.98		68.3325	18.7322	243.002
369794	130.44	1.87135	11.98		68.3325	18.7322	243.002
369994	128.24	1.88192	11.973		67.18	18.838	242.86
370194	127.84	1.88176	11.978		66.9704	18.8364	242.961
370394	127.84	1.88176	11.978		66.9704	18.8364	242.961
370594	127.84	1.88176	11.978		66.9704	18.8364	242.961
370794	127.42	1.8851	11.981		66.7504	18.8699	243.022
370994	131.84	1.88366	11.979		69.0659	18.8555	242.982
371194	131.9	1.88744	11.974		69.0973	18.8933	242.88
371394	131.9	1.88744	11.974		69.0973	18.8933	242.88
371594	131.9	1.88744	11.974		69.0973	18.8933	242.88
371794	131.9	1.88744	11.974		69.0973	18.8933	242.88
371994	131.9	1.88744	11.974		69.0973	18.8933	242.88
372194	131.9	1.88744	11.974		69.0973	18.8933	242.88
372394	131.9	1.88744	11.974		69.0973	18.8933	242.88
372594	128.6	1.89509	11.972		67.3686	18.9699	242.84
372794	128.6	1.89509	11.972		67.3686	18.9699	242.84
372994	128.6	1.89509	11.972		67.3686	18.9699	242.84
373194	128.6	1.89509	11.972		67.3686	18.9699	242.84
373394	128.6	1.89509	11.972		67.3686	18.9699	242.84
373594	131.12	1.89701	11.98		68.6887	18.9891	243.002
373794	131.12	1.89701	11.98		68.6887	18.9891	243.002
373994	131.12	1.89701	11.98		68.6887	18.9891	243.002
374194	131.12	1.89701	11.98		68.6887	18.9891	243.002
374394	131.12	1.89701	11.98		68.6887	18.9891	243.002
374594	128.72	1.90475	11.975		67.4314	19.0666	242.901
374794	128.72	1.90475	11.975		67.4314	19.0666	242.901
374994	128.72	1.90475	11.975		67.4314	19.0666	242.901
375194	128.72	1.90475	11.975		67.4314	19.0666	242.901
375394	128.72	1.90475	11.975		67.4314	19.0666	242.901
375594	131.22	1.90697	11.977		68.7411	19.0888	242.941
375794	131.22	1.90697	11.977		68.7411	19.0888	242.941
375994	131.22	1.90697	11.977		68.7411	19.0888	242.941
376194	131.22	1.90697	11.977		68.7411	19.0888	242.941
376394	131.22	1.90697	11.977		68.7411	19.0888	242.941
376594	128.58	1.9149	11.978		67.3581	19.1682	242.961
376794	128.3	1.9144	11.98		67.2114	19.1632	243.002
376994	128.3	1.9144	11.98		67.2114	19.1632	243.002
377194	128.3	1.9144	11.98		67.2114	19.1632	243.002
377394	128.06	1.91788	11.98		67.0857	19.198	243.002
377594	132.32	1.91649	11.979		69.3173	19.1841	242.982
377794	132.32	1.91649	11.979		69.3173	19.1841	242.982
377994	132.32	1.91649	11.979		69.3173	19.1841	242.982
378194	132.32	1.91649	11.979		69.3173	19.1841	242.982
378394	132.32	1.91649	11.979		69.3173	19.1841	242.982
378594	132.32	1.91649	11.979		69.3173	19.1841	242.982
378794	132.32	1.91649	11.979		69.3173	19.1841	242.982
378994	132.32	1.91649	11.979		69.3173	19.1841	242.982
379194	129.34	1.92783	11.974		67.7562	19.2976	242.88
379394	129.34	1.92783	11.974		67.7562	19.2976	242.88
379594	133.04	1.92614	11.98		69.6945	19.2807	243.002
379794	132.56	1.9299	11.974		69.443	19.3183	242.88
379994	132.56	1.9299	11.974		69.443	19.3183	242.88
380194	132.56	1.9299	11.974		69.443	19.3183	242.88
380394	132.56	1.9299	11.974		69.443	19.3183	242.88
380594	132.56	1.9299	11.974		69.443	19.3183	242.88
380794	132.56	1.9299	11.974		69.443	19.3183	242.88
380994	132.56	1.9299	11.974		69.443	19.3183	242.88
381194	128.92	1.93768	11.976		67.5362	19.3962	242.921
381394	128.72	1.93725	11.98		67.4314	19.3919	243.002
381594	128.72	1.93725	11.98		67.4314	19.3919	243.002
381794	128.72	1.93725	11.98		67.4314	19.3919	243.002
381994	128.24	1.94082	11.98		67.18	19.4276	243.002
382194	132.72	1.93935	11.979		69.5269	19.4129	242.982
382394	132.72	1.93935	11.979		69.5269	19.4129	242.982
382594	132.72	1.93935	11.979		69.5269	19.4129	242.982
382794	132.72	1.93935	11.979		69.5269	19.4129	242.982
382994	132.72	1.93935	11.979		69.5269	19.4129	242.982
383194	129.16	1.94739	11.978		67.6619	19.4934	242.961
383394	129.2	1.94718	11.977		67.6829	19.4913	242.941
383594	129.2	1.94718	11.977		67.6829	19.4913	242.941
383794	129.2	1.94718	11.977		67.6829	19.4913	242.941
383994	129.2	1.94718	11.977		67.6829	19.4913	242.941
384194	133.04	1.94924	11.978		69.6945	19.5119	242.961
384394	133.04	1.94924	11.978		69.6945	19.5119	242.961
384594	133.04	1.94924	11.978		69.6945	19.5119	242.961
384794	133.04	1.94924	11.978		69.6945	19.5119	242.961
384994	133.04	1.94924	11.978		69.6945	19.5119	242.961
385194	133.04	1.94924	11.978		69.6945	19.5119	242.961
385394	133.04	1.94924	11.978		69.6945	19.5119	242.961
385594	133.04	1.94924	11.978		69.6945	19.5119	242.961
385794	129.96	1.96051	11.972		68.081	19.6247	242.84
385994	129.96	1.96051	11.972		68.081	19.6247	242.84
386194	129.96	1.96051	11.972		68.081	19.6247	242.84
386394	129.96	1.96051	11.972		68.081	19.6247	242.84
386594	129.96	1.96051	11.972		68.081	19.6247	242.84
386794	132.2	1.96263	11.979		69.2545	19.6459	242.982
386994	132.2	1.96263	11.979		69.2545	19.6459	242.982
387194	132.2	1.96263	11.979		69.2545	19.6459	242.982
387394	132.2	1.96263	11.979		69.2545	19.6459	242.982
387594	132.2	1.96263	11.979		69.2545	19.6459	242.982
387794	132.2	1.96263	11.979		69.2545	19.6459	242.982
387994	132.2	1.96263	11.979		69.2545	19.6459	242.982
388194	130.1	1.97216	11.976		68.1543	19.7413	242.921
388394	130.1	1.97216	11.976		68.1543	19.7413	242.921
388594	130.1	1.97216	11.976		68.1543	19.7413	242.921
388794	129.42	1.9756	11.974		67.7981	19.7758	242.88
388994	129.42	1.9756	11.974		67.7981	19.7758	242.88
389194	132.34	1.97448	11.976		69.3278	19.7646	242.921
389394	132.34	1.97448	11.976		69.3278	19.7646	242.921
389594	132.34	1.97448	11.976		69.3278	19.7646	242.921
389794	132.34	1.97448	11.976		69.3278	19.7646	242.921
389994	132.34	1.97448	11.976		69.3278	19.7646	242.921
390194	128.74	1.98254	11.979		67.4419	19.8452	242.982
390394	128.7	1.98245	11.982		67.4209	19.8443	243.043
390594	128.7	1.98245	11.982		67.4209	19.8443	243.043
390794	128.7	1.98245	11.982		67.4209	19.8443	243.043
390994	128.7	1.98245	11.982		67.4209	19.8443	243.043
391194	131.78	1.98458	11.978		69.0344	19.8657	242.961
391394	131.78	1.98458	11.978		69.0344	19.8657	242.961
391594	131.78	1.98458	11.978		69.0344	19.8657	242.961
391794	131.78	1.98458	11.978		69.0344	19.8657	242.961
391994	131.78	1.98458	11.978		69.0344	19.8657	242.961
392194	129.16	1.99269	11.975		67.6619	19.9468	242.901
392394	129.16	1.99269	11.975		67.6619	19.9468	242.901
392594	133.06	1.99103	11.978		69.705	19.9302	242.961
392794	133.22	1.99487	11.974		69.7888	19.9687	242.88
392994	133.22	1.99487	11.974		69.7888	19.9687	242.88
393194	133.22	1.99487	11.974		69.7888	19.9687	242.88
393394	133.22	1.99487	11.974		69.7888	19.9687	242.88
393594	128.92	1.99968	11.976		67.5362	20.0168	242.921
393794	128.98	1.99926	11.978		67.5676	20.0126	242.961
393994	128.98	1.99926	11.978		67.5676	20.0126	242.961
394194	128.98	1.99926	11.978		67.5676	20.0126	242.961
394394	128.98	1.99926	11.978		67.5676	20.0126	242.961
394594	132.56	2.0013	11.978		69.443	20.033	242.961
394794	132.56	2.0013	11.978		69.443	20.033	242.961
394994	132.56	2.0013	11.978		69.443	20.033	242.961
395194	132.56	2.0013	11.978		69.443	20.033	242.961
395394	132.56	2.0013	11.978		69.443	20.033	242.961
395594	129.44	2.0095	11.976		67.8086	20.1151	242.921
395794	129.44	2.0095	11.976		67.8086	20.1151	242.921
395994	133.28	2.00795	11.978		69.8202	20.0996	242.961
396194	133.44	2.0117	11.977		69.904	20.1371	242.941
396394	133.44	2.0117	11.977		69.904	20.1371	242.941
396594	133.44	2.0117	11.977		69.904	20.1371	242.941
396794	133.44	2.0117	11.977		69.904	20.1371	242.941
396994	128.98	2.01656	11.976		67.5676	20.1858	242.921
397194	129.28	2.01595	11.98		67.7248	20.1797	243.002
[truncated: 128 more rows]

## Sheet: ZD-8-15
Time: 11:17:48,06/22/2019
diameter: 49.7	mm	height: 100.5	mm
Vertical 100kN force sensor (vertical force of test piece)
Control mode: force / confining pressure	waveform: slope
KN/s	Force end point: 29.880	KN	confining pressure rate: 0.500	MPa/s	confining pressure end point: 14.9920	MPa
time (ms)	vertical force (KN)	vertical deformation (mm)	confining pressure (MPa)		Stress (MPa)	axial strain	transverse strain
0	0	0	0		0	0	0
200	0	-0.0002	0		0	-0.00199005	0
401	0.06	-0.00032	0.001		0.0309278	-0.00318408	0.0201207
601	0.2	-0.00027	0.009		0.103093	-0.00268657	0.181087
801	0.3	-0.00031	0.017		0.154639	-0.00308458	0.342052
1003	0.64	-0.00042	0.027		0.329896	-0.0041791	0.54326
1204	0.82	-0.00039	0.039		0.42268	-0.0038806	0.784708
1405	0.96	-0.00024	0.06		0.494844	-0.00238806	1.20724
1605	1.08	0.00072	0.085		0.5567	0.00716418	1.71026
1805	1.36	0.00362	0.124		0.701029	0.0360199	2.49497
2005	1.52	0.00887	0.179		0.783503	0.0882587	3.60161
2206	1.66	0.01552	0.235		0.855668	0.154428	4.72837
2407	1.88	0.02654	0.278		0.96907	0.26408	5.59356
2607	2.12	0.03916	0.316		1.09278	0.389652	6.35815
2807	2.46	0.05184	0.353		1.26804	0.515821	7.10262
3007	2.54	0.06481	0.387		1.30928	0.644876	7.78672
3208	2.8	0.07782	0.416		1.4433	0.774328	8.37022
3408	3	0.09035	0.435		1.54639	0.899005	8.75252
3609	3.28	0.10265	0.459		1.69072	1.02139	9.23541
3809	3.62	0.11503	0.489		1.86598	1.14458	9.83903
4009	3.64	0.12503	0.532		1.87628	1.24408	10.7042
4211	3.92	0.13173	0.605		2.02061	1.31075	12.173
4412	4	0.1375	0.741		2.06185	1.36816	14.9095
4613	4.28	0.1408	1.037		2.20618	1.401	20.8652
4813	4.46	0.14154	1.674		2.29896	1.40836	33.6821
5013	4.84	0.14211	2.187		2.49484	1.41403	44.004
5213	4.98	0.14806	2.317		2.567	1.47323	46.6197
5414	5.18	0.15349	2.675		2.6701	1.52726	53.8229
5615	5.32	0.15994	2.797		2.74226	1.59144	56.2777
5815	5.66	0.16692	2.865		2.91752	1.6609	57.6459
6015	5.66	0.17022	2.967		2.91752	1.69373	59.6982
6215	5.78	0.17238	3.069		2.97938	1.71522	61.7505
6416	6.06	0.17738	3.166		3.1237	1.76498	63.7022
6616	6.44	0.18755	3.266		3.31958	1.86617	65.7143
6817	6.64	0.19508	3.367		3.42267	1.94109	67.7465
7017	6.78	0.19983	3.469		3.49484	1.98836	69.7988
7217	6.92	0.20418	3.57		3.567	2.03164	71.831
7419	7.2	0.20828	3.669		3.71133	2.07244	73.8229
7620	7.38	0.21272	3.769		3.80412	2.11662	75.835
7821	7.46	0.21689	3.871		3.84535	2.15811	77.8873
8021	7.64	0.22123	3.969		3.93814	2.20129	79.8592
8221	7.82	0.22546	4.072		4.03092	2.24338	81.9316
8421	8.08	0.22957	4.172		4.16494	2.28428	83.9437
8622	8.26	0.23381	4.27		4.25772	2.32647	85.9155
8823	8.56	0.2381	4.372		4.41236	2.36915	87.9678
9023	8.74	0.24254	4.471		4.50515	2.41333	89.9598
9223	8.86	0.2468	4.573		4.567	2.45572	92.0121
9423	9.14	0.251	4.671		4.71133	2.49751	93.9839
9624	9.42	0.2553	4.769		4.85566	2.5403	95.9557
9824	9.52	0.25947	4.871		4.90721	2.58179	98.008
10025	9.74	0.26359	4.971		5.02061	2.62279	100.02
10225	10.02	0.26779	5.074		5.16494	2.66458	102.093
10425	10.12	0.27186	5.171		5.21648	2.70507	104.044
10627	10.38	0.27577	5.275		5.3505	2.74398	106.137
10828	10.62	0.27988	5.372		5.47422	2.78488	108.089
11029	10.88	0.28359	5.475		5.60824	2.82179	110.161
11229	11.06	0.28733	5.575		5.70102	2.859	112.173
11429	11.16	0.29079	5.674		5.75257	2.89343	114.165
11629	11.42	0.2939	5.775		5.88659	2.92438	116.197
11830	11.62	0.29673	5.875		5.98968	2.95254	118.209
12031	11.72	0.2991	5.973		6.04122	2.97612	120.181
12231	11.78	0.30158	6.074		6.07215	3.0008	122.213
12431	11.98	0.30391	6.172		6.17524	3.02398	124.185
12631	12.18	0.30634	6.275		6.27834	3.04816	126.258
12832	12.36	0.30907	6.377		6.37112	3.07532	128.31
13032	12.7	0.31335	6.474		6.54638	3.11791	130.262
13233	13.06	0.31943	6.574		6.73194	3.17841	132.274
13433	13.3	0.32484	6.674		6.85566	3.23224	134.286
13633	13.2	0.32688	6.776		6.80411	3.25254	136.338
13835	13.34	0.32763	6.878		6.87627	3.26	138.39
14036	13.7	0.33171	6.98		7.06184	3.3006	140.443
14237	14.06	0.33678	7.076		7.24741	3.35104	142.374
14437	14.26	0.34071	7.176		7.3505	3.39015	144.386
14637	14.2	0.34163	7.278		7.31957	3.3993	146.439
14837	14.38	0.34237	7.367		7.41236	3.40667	148.229
15038	14.62	0.34598	7.482		7.53607	3.44259	150.543
15239	15.1	0.35192	7.578		7.78349	3.50169	152.475
15439	15.14	0.3559	7.676		7.80411	3.54129	154.447
15639	15.28	0.35785	7.779		7.87627	3.5607	156.519
15839	15.34	0.35973	7.879		7.9072	3.5794	158.531
16040	15.62	0.36333	7.98		8.05153	3.61522	160.563
16240	15.96	0.36871	8.08		8.22679	3.66876	162.575
16441	16.32	0.37369	8.176		8.41235	3.71831	164.507
16641	16.3	0.3758	8.281		8.40204	3.7393	166.62
16841	16.36	0.37707	8.381		8.43297	3.75194	168.632
17043	16.56	0.3786	8.478		8.53606	3.76716	170.584
17244	16.86	0.3819	8.578		8.6907	3.8	172.596
17445	17.12	0.38591	8.681		8.82472	3.8399	174.668
17645	17.36	0.38972	8.777		8.94843	3.87781	176.6
17845	17.6	0.39354	8.877		9.07215	3.91582	178.612
18045	17.84	0.39716	8.982		9.19586	3.95184	180.724
18246	17.98	0.40031	9.078		9.26802	3.98318	182.656
18447	18.24	0.40292	9.178		9.40204	4.00915	184.668
18647	18.38	0.40547	9.278		9.47421	4.03453	186.68
18847	18.62	0.40768	9.38		9.59792	4.05652	188.732
19047	18.78	0.40993	9.482		9.68039	4.07891	190.785
19248	18.92	0.41208	9.579		9.75256	4.1003	192.736
19448	19.08	0.41412	9.683		9.83503	4.1206	194.829
19649	19.3	0.41625	9.781		9.94843	4.14179	196.801
19849	19.36	0.41842	9.878		9.97936	4.16338	198.753
20049	19.66	0.42062	9.982		10.134	4.18527	200.845
20250	19.78	0.42288	10.082		10.1959	4.20776	202.857
20450	20.02	0.42559	10.182		10.3196	4.23473	204.869
20651	20.42	0.42995	10.28		10.5258	4.27811	206.841
20851	20.66	0.43427	10.383		10.6495	4.32109	208.913
21051	20.58	0.4351	10.483		10.6082	4.32935	210.926
21253	20.66	0.43597	10.582		10.6495	4.33801	212.918
21454	21.06	0.43903	10.687		10.8556	4.36846	215.03
21655	21.4	0.44251	10.784		11.0309	4.40308	216.982
21855	21.7	0.446	10.889		11.1855	4.43781	219.095
22055	21.78	0.44818	10.984		11.2268	4.4595	221.006
22255	21.88	0.44984	11.088		11.2783	4.47602	223.099
22456	22.1	0.45136	11.186		11.3917	4.49114	225.07
22657	22.26	0.45291	11.284		11.4742	4.50657	227.042
22857	22.36	0.45457	11.386		11.5257	4.52308	229.095
23057	22.52	0.45632	11.484		11.6082	4.5405	231.066
23257	22.86	0.4586	11.584		11.7835	4.56318	233.078
23458	23.18	0.46239	11.683		11.9484	4.6009	235.07
23658	23.42	0.4663	11.786		12.0721	4.6398	237.143
23859	23.78	0.46978	11.888		12.2577	4.67443	239.195
24059	23.74	0.47129	11.984		12.2371	4.68945	241.127
24259	23.9	0.47183	12.085		12.3196	4.69483	243.159
24461	23.92	0.47263	12.184		12.3299	4.70279	245.151
24662	24.28	0.4753	12.288		12.5154	4.72935	247.243
24863	24.52	0.47882	12.385		12.6391	4.76438	249.195
25063	24.84	0.48211	12.488		12.8041	4.79711	251.268
25263	25.1	0.48431	12.587		12.9381	4.819	253.26
25463	24.98	0.48496	12.69		12.8763	4.82547	255.332
25664	25.12	0.48551	12.786		12.9484	4.83095	257.264
25865	25.54	0.48766	12.887		13.1649	4.85234	259.296
26065	25.78	0.49108	12.986		13.2886	4.88637	261.288
26265	25.98	0.49411	13.086		13.3917	4.91652	263.3
26465	26.38	0.49707	13.187		13.5979	4.94597	265.332
26666	26.38	0.49907	13.291		13.5979	4.96587	267.425
26866	26.42	0.49985	13.387		13.6185	4.97363	269.356
27067	26.56	0.5006	13.489		13.6907	4.98109	271.408
27267	26.84	0.50281	13.588		13.835	5.00308	273.4
27467	27.08	0.50552	13.69		13.9587	5.03005	275.453
27669	27.24	0.50827	13.79		14.0412	5.05741	277.465
27870	27.56	0.51115	13.89		14.2062	5.08607	279.477
28071	27.9	0.51363	13.987		14.3814	5.11075	281.429
28271	28.12	0.51636	14.091		14.4948	5.13791	283.521
28471	28.28	0.5186	14.191		14.5773	5.1602	285.533
28671	28.26	0.51981	14.295		14.567	5.17224	287.626
28872	28.46	0.52064	14.391		14.6701	5.1805	289.557
29073	28.54	0.52151	14.493		14.7113	5.18915	291.61
29273	28.84	0.52291	14.589		14.8659	5.20308	293.541
29473	29.14	0.5255	14.691		15.0206	5.22886	295.594
29673	29.48	0.52828	14.793		15.1958	5.25652	297.646
29874	29.68	0.53091	14.892		15.2989	5.28269	299.638
30074	29.88	0.53354	14.992		15.402	5.30886	301.65
控制模式:围压	波形:斜坡
MPa/s	终点:15.0100	MPa
时间(ms)	垂直力(KN)	垂直变形(mm)	围压(MPa)
30131	30.02	0.53429	15.01		15.4742	5.31632	302.012
控制模式:位移	波形:斜坡
mm/s	终点:2.6490	mm
时间(ms)	垂直力(KN)	垂直变形(mm)	围压(MPa)
30162	30.06	0.53448	15.005		15.4948	5.31821	301.911
30363	28.76	0.53593	14.985		14.8247	5.33264	301.509
30563	28.76	0.53593	14.985		14.8247	5.33264	301.509
30763	28.76	0.53593	14.985		14.8247	5.33264	301.509
30963	28.76	0.53593	14.985		14.8247	5.33264	301.509
31165	29.08	0.53792	14.987		14.9897	5.35244	301.549
31365	29.08	0.53792	14.987		14.9897	5.35244	301.549
31565	28.58	0.5403	14.986		14.7319	5.37612	301.529
31765	28.3	0.5434	14.982		14.5876	5.40697	301.449
31965	28.3	0.5434	14.982		14.5876	5.40697	301.449
32165	28.3	0.5434	14.982		14.5876	5.40697	301.449
32365	28.3	0.5434	14.982		14.5876	5.40697	301.449
32565	28.64	0.54568	14.987		14.7629	5.42965	301.549
32765	28.64	0.54568	14.987		14.7629	5.42965	301.549
32965	28.64	0.54568	14.987		14.7629	5.42965	301.549
33165	28.64	0.54568	14.987		14.7629	5.42965	301.549
33365	28.64	0.54568	14.987		14.7629	5.42965	301.549
33565	28.64	0.54568	14.987		14.7629	5.42965	301.549
33765	28.76	0.55323	14.983		14.8247	5.50478	301.469
33965	28.76	0.55323	14.983		14.8247	5.50478	301.469
34165	28.76	0.55323	14.983		14.8247	5.50478	301.469
34365	28.76	0.55323	14.983		14.8247	5.50478	301.469
34565	28.76	0.55323	14.983		14.8247	5.50478	301.469
34765	28.4	0.55806	14.984		14.6391	5.55284	301.489
34965	29.12	0.55761	14.989		15.0103	5.54836	301.59
35165	29.12	0.55761	14.989		15.0103	5.54836	301.59
35365	29.12	0.55761	14.989		15.0103	5.54836	301.59
35565	29.12	0.55761	14.989		15.0103	5.54836	301.59
35765	29.12	0.55761	14.989		15.0103	5.54836	301.59
35965	30.02	0.56219	14.987		15.4742	5.59393	301.549
36165	30.28	0.5649	14.985		15.6082	5.6209	301.509
36365	30.28	0.5649	14.985		15.6082	5.6209	301.509
36565	30.28	0.5649	14.985		15.6082	5.6209	301.509
36765	30.28	0.5649	14.985		15.6082	5.6209	301.509
36965	30.28	0.5649	14.985		15.6082	5.6209	301.509
37165	30.28	0.5649	14.985		15.6082	5.6209	301.509
37365	30.16	0.56924	14.985		15.5464	5.66408	301.509
37565	30.16	0.56924	14.985		15.5464	5.66408	301.509
37765	30.16	0.56924	14.985		15.5464	5.66408	301.509
37965	30.16	0.56924	14.985		15.5464	5.66408	301.509
38165	30.16	0.56924	14.985		15.5464	5.66408	301.509
38365	30.16	0.56924	14.985		15.5464	5.66408	301.509
38565	30.16	0.56924	14.985		15.5464	5.66408	301.509
38765	30.18	0.57634	14.985		15.5567	5.73473	301.509
38965	30.18	0.57634	14.985		15.5567	5.73473	301.509
39165	30.18	0.57634	14.985		15.5567	5.73473	301.509
39365	30.18	0.57634	14.985		15.5567	5.73473	301.509
39565	30.3	0.5813	14.987		15.6185	5.78408	301.549
39765	31.54	0.58076	14.985		16.2577	5.77871	301.509
39965	31.54	0.58076	14.985		16.2577	5.77871	301.509
40165	31.54	0.58076	14.985		16.2577	5.77871	301.509
40365	31.54	0.58076	14.985		16.2577	5.77871	301.509
40565	31.54	0.58076	14.985		16.2577	5.77871	301.509
40765	31.54	0.58076	14.985		16.2577	5.77871	301.509
40965	32.1	0.58767	14.983		16.5464	5.84746	301.469
41165	32.1	0.58767	14.983		16.5464	5.84746	301.469
41365	34.08	0.58767	14.985		17.567	5.84746	301.509
41565	34.94	0.58947	14.983		18.0103	5.86537	301.469
41765	34.94	0.58947	14.983		18.0103	5.86537	301.469
41965	35.44	0.5909	14.986		18.268	5.8796	301.529
42165	36.2	0.59273	14.985		18.6598	5.89781	301.509
42365	36.5	0.59232	14.987		18.8144	5.89373	301.549
42565	36.5	0.59232	14.987		18.8144	5.89373	301.549
42765	36.5	0.59232	14.987		18.8144	5.89373	301.549
42965	36.5	0.59232	14.987		18.8144	5.89373	301.549
43165	36.5	0.59232	14.987		18.8144	5.89373	301.549
43365	36.5	0.59232	14.987		18.8144	5.89373	301.549
43565	36.5	0.59232	14.987		18.8144	5.89373	301.549
43765	36.34	0.59938	14.987		18.7319	5.96398	301.549
43965	37.04	0.60144	14.983		19.0927	5.98448	301.469
44165	36.86	0.6012	14.985		19	5.98209	301.509
44365	37	0.60325	14.985		19.0721	6.00249	301.509
44565	37	0.60325	14.985		19.0721	6.00249	301.509
44765	36.66	0.60517	14.987		18.8969	6.02159	301.549
44965	36.66	0.60517	14.987		18.8969	6.02159	301.549
45165	36.88	0.60699	14.981		19.0103	6.0397	301.429
45365	36.88	0.60699	14.981		19.0103	6.0397	301.429
45565	36.5	0.60903	14.983		18.8144	6.06	301.469
45765	36.5	0.60903	14.983		18.8144	6.06	301.469
45965	37.1	0.61081	14.985		19.1237	6.07771	301.509
46165	37.1	0.61081	14.985		19.1237	6.07771	301.509
46365	36.96	0.61286	14.986		19.0515	6.09811	301.529
46565	36.96	0.61286	14.986		19.0515	6.09811	301.529
46765	36.72	0.61455	14.988		18.9278	6.11493	301.569
46965	36.72	0.61455	14.988		18.9278	6.11493	301.569
47165	37.26	0.61636	14.983		19.2061	6.13294	301.469
47365	37.26	0.61636	14.983		19.2061	6.13294	301.469
47565	37.58	0.61815	14.987		19.3711	6.15075	301.549
47765	37.58	0.61815	14.987		19.3711	6.15075	301.549
47965	37.6	0.61994	14.987		19.3814	6.16856	301.549
48165	37.6	0.61994	14.987		19.3814	6.16856	301.549
48365	38.04	0.62179	14.988		19.6082	6.18697	301.569
48565	38.04	0.62179	14.988		19.6082	6.18697	301.569
48765	38.34	0.62378	14.988		19.7628	6.20677	301.569
48965	38.34	0.62378	14.988		19.7628	6.20677	301.569
49165	38.16	0.62584	14.984		19.6701	6.22726	301.489
49365	38.16	0.62584	14.984		19.6701	6.22726	301.489
49565	38.6	0.62749	14.988		19.8969	6.24368	301.569
49765	38.6	0.62749	14.988		19.8969	6.24368	301.569
49965	38.7	0.62966	14.985		19.9484	6.26527	301.509
50165	38.7	0.62966	14.985		19.9484	6.26527	301.509
50365	38.44	0.63185	14.986		19.8144	6.28706	301.529
50565	38.44	0.63185	14.986		19.8144	6.28706	301.529
50765	38.9	0.63379	14.987		20.0515	6.30637	301.549
50965	38.9	0.63379	14.987		20.0515	6.30637	301.549
51165	39.14	0.6358	14.984		20.1752	6.32637	301.489
51365	39.14	0.6358	14.984		20.1752	6.32637	301.489
51565	39.22	0.63797	14.989		20.2165	6.34796	301.59
51765	39.22	0.63797	14.989		20.2165	6.34796	301.59
51965	39.94	0.64002	14.984		20.5876	6.36836	301.489
52165	39.94	0.64002	14.984		20.5876	6.36836	301.489
52365	40.2	0.64203	14.984		20.7216	6.38836	301.489
52565	40.62	0.64168	14.988		20.9381	6.38488	301.569
52765	40.7	0.64416	14.986		20.9793	6.40955	301.529
52965	40.42	0.64385	14.986		20.835	6.40647	301.529
53165	40.42	0.64385	14.986		20.835	6.40647	301.529
53365	40.32	0.64589	14.987		20.7835	6.42677	301.549
53565	40.32	0.64589	14.987		20.7835	6.42677	301.549
53765	40.3	0.64809	14.989		20.7732	6.44866	301.59
53965	40.3	0.64809	14.989		20.7732	6.44866	301.59
54165	40.36	0.64997	14.988		20.8041	6.46736	301.569
54365	40.36	0.64997	14.988		20.8041	6.46736	301.569
54565	40.6	0.65209	14.987		20.9278	6.48846	301.549
54765	40.6	0.65209	14.987		20.9278	6.48846	301.549
54965	40.76	0.65413	14.987		21.0103	6.50876	301.549
55165	40.76	0.65413	14.987		21.0103	6.50876	301.549
55365	41.64	0.65623	14.984		21.4639	6.52965	301.489
55565	41.64	0.65623	14.984		21.4639	6.52965	301.489
55765	41.4	0.65831	14.985		21.3402	6.55035	301.509
55965	41.4	0.65831	14.985		21.3402	6.55035	301.509
56165	41.78	0.66038	14.983		21.536	6.57095	301.469
56365	41.78	0.66038	14.983		21.536	6.57095	301.469
56565	42.02	0.66239	14.986		21.6597	6.59095	301.529
56765	42.52	0.66202	14.985		21.9175	6.58726	301.509
56965	42.56	0.6643	14.986		21.9381	6.60995	301.529
57165	42.34	0.66418	14.984		21.8247	6.60876	301.489
57365	42.34	0.66418	14.984		21.8247	6.60876	301.489
57565	42.24	0.66632	14.983		21.7731	6.63005	301.469
57765	42.24	0.66632	14.983		21.7731	6.63005	301.469
57965	42.44	0.66815	14.987		21.8762	6.64826	301.549
58165	42.44	0.66815	14.987		21.8762	6.64826	301.549
58365	42.66	0.67037	14.985		21.9896	6.67035	301.509
58565	42.66	0.67037	14.985		21.9896	6.67035	301.509
58765	42.4	0.67246	14.983		21.8556	6.69114	301.469
58965	42.4	0.67246	14.983		21.8556	6.69114	301.469
59165	42.72	0.67455	14.985		22.0206	6.71194	301.509
59365	42.72	0.67455	14.985		22.0206	6.71194	301.509
59565	42.86	0.6765	14.986		22.0927	6.73134	301.529
59765	42.86	0.6765	14.986		22.0927	6.73134	301.529
59965	43.1	0.67842	14.983		22.2164	6.75045	301.469
60165	43.1	0.67842	14.983		22.2164	6.75045	301.469
60365	43.24	0.68057	14.984		22.2886	6.77184	301.489
60565	43.24	0.68057	14.984		22.2886	6.77184	301.489
60765	43.54	0.68236	14.984		22.4433	6.78965	301.489
60965	43.54	0.68236	14.984		22.4433	6.78965	301.489
61165	43.66	0.68442	14.984		22.5051	6.81015	301.489
61365	43.66	0.68442	14.984		22.5051	6.81015	301.489
61565	44.1	0.68626	14.984		22.7319	6.82846	301.489
61765	44.1	0.68626	14.984		22.7319	6.82846	301.489
61965	44.32	0.68819	14.985		22.8453	6.84766	301.509
62165	44.32	0.68819	14.985		22.8453	6.84766	301.509
62365	44.58	0.6903	14.984		22.9793	6.86866	301.489
62565	44.58	0.6903	14.984		22.9793	6.86866	301.489
62765	44.84	0.69241	14.981		23.1134	6.88965	301.429
62965	45.18	0.69199	14.986		23.2886	6.88547	301.529
63165	45.46	0.69429	14.984		23.4329	6.90836	301.489
63365	45.1	0.69432	14.985		23.2474	6.90866	301.509
63565	45.1	0.69432	14.985		23.2474	6.90866	301.509
63765	45	0.69625	14.987		23.1958	6.92786	301.549
63965	45	0.69625	14.987		23.1958	6.92786	301.549
64165	44.9	0.69839	14.985		23.1443	6.94915	301.509
64365	44.9	0.69839	14.985		23.1443	6.94915	301.509
64565	45.24	0.70037	14.982		23.3195	6.96886	301.449
64765	45.24	0.70037	14.982		23.3195	6.96886	301.449
64965	45.34	0.70243	14.985		23.3711	6.98935	301.509
65165	45.34	0.70243	14.985		23.3711	6.98935	301.509
65365	45.48	0.70448	14.986		23.4432	7.00975	301.529
65565	45.48	0.70448	14.986		23.4432	7.00975	301.529
65765	45.84	0.70656	14.987		23.6288	7.03045	301.549
65965	45.84	0.70656	14.987		23.6288	7.03045	301.549
66165	46.2	0.70853	14.985		23.8144	7.05005	301.509
66365	47.3	0.70824	14.989		24.3814	7.04716	301.59
66565	46.82	0.71041	14.981		24.134	7.06876	301.429
66765	47.32	0.71014	14.984		24.3917	7.06607	301.489
66965	46.92	0.71268	14.985		24.1855	7.09134	301.509
67165	46.96	0.71256	14.984		24.2061	7.09015	301.489
67365	46.96	0.71256	14.984		24.2061	7.09015	301.489
67565	46.72	0.71475	14.987		24.0824	7.11194	301.549
67765	46.72	0.71475	14.987		24.0824	7.11194	301.549
67965	46.82	0.71671	14.984		24.134	7.13144	301.489
68165	46.82	0.71671	14.984		24.134	7.13144	301.489
68365	46.8	0.71892	14.988		24.1237	7.15343	301.569
68565	46.8	0.71892	14.988		24.1237	7.15343	301.569
68765	46.92	0.72098	14.983		24.1855	7.17393	301.469
68965	46.92	0.72098	14.983		24.1855	7.17393	301.469
69165	47.32	0.72304	14.983		24.3917	7.19443	301.469
69365	47.32	0.72304	14.983		24.3917	7.19443	301.469
69565	47.7	0.7249	14.985		24.5876	7.21294	301.509
69765	47.7	0.7249	14.985		24.5876	7.21294	301.509
69965	48.06	0.72688	14.985		24.7731	7.23264	301.509
70165	48.06	0.72688	14.985		24.7731	7.23264	301.509
70365	48.3	0.72899	14.987		24.8969	7.25363	301.549
70565	48.8	0.72872	14.988		25.1546	7.25095	301.569
70765	48.98	0.73106	14.986		25.2474	7.27423	301.529
70965	48.92	0.73088	14.989		25.2164	7.27244	301.59
71165	48.92	0.73088	14.989		25.2164	7.27244	301.59
71365	48.76	0.73293	14.984		25.134	7.29284	301.489
71565	48.76	0.73293	14.984		25.134	7.29284	301.489
71765	48.58	0.7352	14.985		25.0412	7.31542	301.509
71965	48.58	0.7352	14.985		25.0412	7.31542	301.509
72165	48.88	0.73709	14.984		25.1958	7.33423	301.489
72365	48.88	0.73709	14.984		25.1958	7.33423	301.489
72565	48.76	0.73923	14.983		25.134	7.35552	301.469
72765	48.76	0.73923	14.983		25.134	7.35552	301.469
72965	49.28	0.74115	14.987		25.402	7.37463	301.549
73165	49.28	0.74115	14.987		25.402	7.37463	301.549
73365	49.7	0.7432	14.985		25.6185	7.39502	301.509
73565	50.88	0.74289	14.986		26.2267	7.39194	301.529
73765	50.4	0.74526	14.987		25.9793	7.41552	301.549
73965	50.74	0.74504	14.986		26.1546	7.41333	301.529
74165	50.64	0.74738	14.985		26.103	7.43662	301.509
74365	50.64	0.74738	14.985		26.103	7.43662	301.509
74565	50.64	0.74738	14.985		26.103	7.43662	301.509
74765	50.64	0.74738	14.985		26.103	7.43662	301.509
74965	50.64	0.74738	14.985		26.103	7.43662	301.509
75165	50.64	0.74738	14.985		26.103	7.43662	301.509
75365	50.64	0.74738	14.985		26.103	7.43662	301.509
75565	50.2	0.75363	14.984		25.8762	7.49881	301.489
75765	50.2	0.75363	14.984		25.8762	7.49881	301.489
75965	50.62	0.75548	14.983		26.0927	7.51721	301.469
76165	50.62	0.75548	14.983		26.0927	7.51721	301.469
76365	50.64	0.75768	14.983		26.103	7.5391	301.469
76565	50.64	0.75768	14.983		26.103	7.5391	301.469
76765	50.68	0.75966	14.984		26.1237	7.55881	301.489
76965	50.68	0.75966	14.984		26.1237	7.55881	301.489
77165	50.92	0.76168	14.985		26.2474	7.57891	301.509
77365	50.92	0.76168	14.985		26.2474	7.57891	301.509
77565	51.08	0.76372	14.988		26.3298	7.5992	301.569
77765	51.08	0.76372	14.988		26.3298	7.5992	301.569
77965	51.96	0.76551	14.985		26.7834	7.61701	301.509
78165	51.96	0.76551	14.985		26.7834	7.61701	301.509
78365	52.14	0.76745	14.986		26.8762	7.63632	301.529
78565	52.14	0.76745	14.986		26.8762	7.63632	301.529
78765	52.36	0.76947	14.982		26.9896	7.65642	301.449
78965	52.36	0.76947	14.982		26.9896	7.65642	301.449
79165	52.58	0.7715	14.983		27.103	7.67662	301.469
79365	53.16	0.77119	14.987		27.402	7.67353	301.549
79565	53.02	0.77334	14.988		27.3298	7.69493	301.569
79765	53.16	0.77329	14.984		27.402	7.69443	301.489
79965	53.24	0.77527	14.981		27.4432	7.71413	301.429
80165	53.14	0.7752	14.985		27.3917	7.71343	301.509
80365	53.14	0.7752	14.985		27.3917	7.71343	301.509
80565	53.14	0.7773	14.985		27.3917	7.73433	301.509
80765	53.14	0.7773	14.985		27.3917	7.73433	301.509
80965	52.82	0.77951	14.987		27.2267	7.75632	301.549
81165	52.82	0.77951	14.987		27.2267	7.75632	301.549
81365	52.82	0.78161	14.987		27.2267	7.77721	301.549
81565	52.82	0.78161	14.987		27.2267	7.77721	301.549
81765	53.04	0.78364	14.987		27.3401	7.79741	301.549
81965	53.04	0.78364	14.987		27.3401	7.79741	301.549
82165	53.26	0.78556	14.986		27.4535	7.81652	301.529
82365	53.26	0.78556	14.986		27.4535	7.81652	301.529
82565	53.38	0.78752	14.986		27.5154	7.83602	301.529
82765	53.38	0.78752	14.986		27.5154	7.83602	301.529
82965	53.62	0.78943	14.983		27.6391	7.85502	301.469
83165	53.62	0.78943	14.983		27.6391	7.85502	301.469
83365	53.72	0.7915	14.985		27.6907	7.87562	301.509
83565	53.72	0.7915	14.985		27.6907	7.87562	301.509
83765	54.58	0.7933	14.987		28.134	7.89353	301.549
83965	54.58	0.7933	14.987		28.134	7.89353	301.549
84165	54.88	0.79519	14.985		28.2886	7.91234	301.509
84365	54.88	0.79519	14.985		28.2886	7.91234	301.509
84565	55.22	0.79727	14.989		28.4639	7.93303	301.59
84765	56.18	0.79704	14.985		28.9587	7.93075	301.509
84965	55.84	0.79906	14.985		28.7834	7.95085	301.509
85165	56.26	0.79901	14.986		28.9999	7.95035	301.529
85365	56.22	0.80132	14.987		28.9793	7.97333	301.549
85565	56.22	0.80132	14.987		28.9793	7.97333	301.549
85765	56.22	0.80132	14.987		28.9793	7.97333	301.549
85965	56.22	0.80132	14.987		28.9793	7.97333	301.549
86165	56.22	0.80132	14.987		28.9793	7.97333	301.549
86365	55.8	0.80567	14.985		28.7628	8.01662	301.509
86565	55.8	0.80567	14.985		28.7628	8.01662	301.509
86765	55.62	0.80783	14.983		28.67	8.03811	301.469
86965	55.62	0.80783	14.983		28.67	8.03811	301.469
87165	56.02	0.80979	14.987		28.8762	8.05761	301.549
87365	56.02	0.80979	14.987		28.8762	8.05761	301.549
87565	56.34	0.81188	14.986		29.0412	8.07841	301.529
87765	56.34	0.81188	14.986		29.0412	8.07841	301.529
87965	56.38	0.81407	14.985		29.0618	8.1002	301.509
88165	57.28	0.81365	14.989		29.5257	8.09602	301.59
88365	57.3	0.81585	14.984		29.536	8.11791	301.489
88565	57.32	0.81574	14.984		29.5463	8.11682	301.489
88765	57.32	0.81574	14.984		29.5463	8.11682	301.489
88965	56.86	0.818	14.986		29.3092	8.1393	301.529
89165	56.86	0.818	14.986		29.3092	8.1393	301.529
89365	56.8	0.82022	14.985		29.2783	8.16139	301.509
89565	56.8	0.82022	14.985		29.2783	8.16139	301.509
89765	57.34	0.82223	14.983		29.5566	8.18139	301.469
89965	57.34	0.82223	14.983		29.5566	8.18139	301.469
90165	57.54	0.82416	14.983		29.6597	8.2006	301.469
90365	57.54	0.82416	14.983		29.6597	8.2006	301.469
90565	57.54	0.82636	14.985		29.6597	8.22249	301.509
90765	57.54	0.82636	14.985		29.6597	8.22249	301.509
90965	58.06	0.82828	14.986		29.9278	8.24159	301.529
91165	58.06	0.82828	14.986		29.9278	8.24159	301.529
91365	58.4	0.83026	14.986		30.103	8.26129	301.529
91565	58.7	0.83005	14.986		30.2577	8.2592	301.529
91765	58.7	0.83005	14.986		30.2577	8.2592	301.529
91965	58.42	0.83235	14.983		30.1133	8.28209	301.469
92165	58.42	0.83235	14.983		30.1133	8.28209	301.469
92365	58.38	0.83447	14.985		30.0927	8.30318	301.509
92565	58.38	0.83447	14.985		30.0927	8.30318	301.509
92765	58.7	0.83645	14.985		30.2577	8.32289	301.509
92965	58.7	0.83645	14.985		30.2577	8.32289	301.509
93165	58.9	0.83869	14.982		30.3608	8.34517	301.449
93365	58.9	0.83869	14.982		30.3608	8.34517	301.449
93565	59.3	0.84065	14.984		30.5669	8.36468	301.489
93765	59.3	0.84065	14.984		30.5669	8.36468	301.489
93965	60.02	0.84259	14.984		30.9381	8.38398	301.489
94165	60.02	0.84259	14.984		30.9381	8.38398	301.489
94365	60.18	0.84474	14.987		31.0206	8.40537	301.549
94565	60.1	0.84477	14.986		30.9793	8.40567	301.529
94765	60.1	0.84477	14.986		30.9793	8.40567	301.529
94965	59.98	0.84691	14.986		30.9175	8.42697	301.529
95165	59.98	0.84691	14.986		30.9175	8.42697	301.529
95365	59.72	0.8492	14.987		30.7834	8.44975	301.549
95565	59.72	0.8492	14.987		30.7834	8.44975	301.549
95765	60	0.8512	14.988		30.9278	8.46965	301.569
95965	60	0.8512	14.988		30.9278	8.46965	301.569
96165	60.54	0.85321	14.983		31.2061	8.48965	301.469
96365	60.54	0.85321	14.983		31.2061	8.48965	301.469
96565	60.8	0.85542	14.985		31.3401	8.51164	301.509
96765	61.52	0.85507	14.987		31.7113	8.50816	301.549
96965	61.38	0.85732	14.985		31.6391	8.53055	301.509
97165	61.5	0.85717	14.985		31.701	8.52905	301.509
97365	61.82	0.85926	14.985		31.8659	8.54985	301.509
97565	61.44	0.8593	14.985		31.67	8.55025	301.509
97765	61.44	0.8593	14.985		31.67	8.55025	301.509
97965	61.46	0.86129	14.987		31.6803	8.57005	301.549
98165	61.46	0.86129	14.987		31.6803	8.57005	301.549
98365	61.64	0.86333	14.985		31.7731	8.59035	301.509
98565	61.64	0.86333	14.985		31.7731	8.59035	301.509
98765	61.5	0.86557	14.986		31.701	8.61264	301.529
98965	61.5	0.86557	14.986		31.701	8.61264	301.529
99165	62.76	0.86743	14.984		32.3504	8.63114	301.489
99365	63.44	0.868	14.987		32.701	8.63682	301.549
99565	63.2	0.86968	14.987		32.5772	8.65353	301.549
99765	63.18	0.86969	14.986		32.5669	8.65363	301.529
99965	63.68	0.87131	14.986		32.8247	8.66975	301.529
100165	63.48	0.87238	14.987		32.7216	8.6804	301.549
100365	63.58	0.87245	14.988		32.7731	8.68109	301.569
100565	63.98	0.87421	14.984		32.9793	8.69861	301.489
100765	64.16	0.87554	14.984		33.0721	8.71184	301.489
100965	63.96	0.87601	14.988		32.969	8.71652	301.569
101165	64.12	0.87656	14.985		33.0515	8.72199	301.509
101365	64.12	0.87726	14.985		33.0515	8.72896	301.509
101565	64.32	0.87839	14.985		33.1546	8.7402	301.509
101765	64.44	0.87965	14.986		33.2164	8.75274	301.529
101965	64.54	0.88091	14.984		33.268	8.76527	301.489
102165	64.62	0.88208	14.986		33.3092	8.77692	301.529
102365	64.82	0.88291	14.985		33.4123	8.78517	301.509
102565	64.92	0.88398	14.985		33.4638	8.79582	301.509
102765	64.84	0.88491	14.983		33.4226	8.80507	301.469
102965	64.94	0.88597	14.985		33.4742	8.81562	301.509
103165	65.12	0.88661	14.988		33.5669	8.82199	301.569
103365	65.24	0.88757	14.985		33.6288	8.83154	301.509
103565	65.28	0.88855	14.985		33.6494	8.84129	301.509
103765	65.3	0.88945	14.985		33.6597	8.85025	301.509
103965	65.36	0.89042	14.986		33.6906	8.8599	301.529
104165	65.46	0.89129	14.985		33.7422	8.86856	301.509
104365	65.6	0.89224	14.985		33.8144	8.87801	301.509
104565	65.68	0.89311	14.985		33.8556	8.88667	301.509
104765	65.74	0.89409	14.984		33.8865	8.89642	301.489
104965	65.8	0.89517	14.985		33.9175	8.90716	301.509
105165	65.9	0.89593	14.984		33.969	8.91473	301.489
105365	66.02	0.89699	14.986		34.0309	8.92527	301.529
105565	66.06	0.89788	14.987		34.0515	8.93413	301.549
105765	66.22	0.89882	14.987		34.1339	8.94348	301.549
105965	66.42	0.89965	14.987		34.237	8.95174	301.549
106165	66.5	0.90073	14.984		34.2783	8.96249	301.489
106365	66.62	0.90158	14.984		34.3401	8.97095	301.489
106565	66.64	0.90258	14.982		34.3504	8.9809	301.449
106765	66.78	0.90353	14.986		34.4226	8.99035	301.529
106965	66.76	0.90453	14.984		34.4123	9.0003	301.489
107165	66.92	0.90548	14.986		34.4948	9.00975	301.529
107365	66.9	0.90638	14.983		34.4845	9.01871	301.469
107565	66.98	0.90726	14.985		34.5257	9.02746	301.509
107765	67.16	0.90819	14.983		34.6185	9.03672	301.469
107965	67.24	0.90927	14.986		34.6597	9.04746	301.529
108165	67.42	0.9104	14.985		34.7525	9.05871	301.509
108365	67.42	0.9113	14.984		34.7525	9.06766	301.489
108565	67.58	0.91235	14.989		34.835	9.07811	301.59
108765	67.68	0.91311	14.986		34.8865	9.08567	301.529
108965	67.84	0.91426	14.986		34.969	9.09711	301.529
109165	67.88	0.91504	14.983		34.9896	9.10488	301.469
109365	68.02	0.91599	14.985		35.0618	9.11433	301.509
109565	68.2	0.91693	14.983		35.1546	9.12368	301.469
109765	68.16	0.91784	14.983		35.1339	9.13274	301.469
109965	68.18	0.91884	14.986		35.1443	9.14269	301.529
110165	68.28	0.9198	14.987		35.1958	9.15224	301.549
110365	68.38	0.92077	14.984		35.2473	9.16189	301.489
110565	68.5	0.92162	14.986		35.3092	9.17035	301.529
110765	68.62	0.92258	14.989		35.3711	9.1799	301.59
110965	68.72	0.92355	14.99		35.4226	9.18955	301.61
[truncated: 1,757 more rows]

## Sheet: ZD-9-3
Time: 11:33:29,06/22/2019
[truncated: 1,509 more rows]
