# Supplementary material for: Physical and Mechanical Properties of Gypsum‐Like Rock Materials
Source: Hindawi journal article supplement (doi:10.1155/2020/3703706), 2020-01-01
Supplement: f1 [file 3703706.f1.zip › 3703706.f1/Original uniaxial compression test data.xlsx]

## Sheet: C-1
Time: 17:27:23,06/20/2019
diameter: 49.4	mm	height: 99.9	mm
Vertical 100kN force sensor (vertical force of test piece)
Control mode: displacement	Waveform: ramp
mm/s	End point: 2.6119	mm
time (ms)	vertical force (KN)	vertical deformation (mm)	transverse deformation (mm)		stress	axial strain	transverse strain
0	0	0	0		0	0	0
503	0	0	0.0002		0	0	0.00404858
1003	0.018	0.0019	0		0.00939137	0.019019	0
1503	0	0.0019	0		0	0.019019	0
2003	0.024	0.0038	-0.0002		0.0125218	0.038038	-0.00404858
2503	0.016	0.0039	-0.0002		0.00834788	0.039039	-0.00404858
3003	0.04	0.0059	-0.0005		0.0208697	0.0590591	-0.0101215
3503	0.028	0.006	-0.0005		0.0146088	0.0600601	-0.0101215
4003	0.05	0.0074	-0.0007		0.0260871	0.0740741	-0.01417
4503	0.054	0.0088	-0.001		0.0281741	0.0880881	-0.0202429
5003	0.056	0.0094	-0.0011		0.0292176	0.0940941	-0.0222672
5503	0.06	0.0104	-0.0012		0.0313046	0.104104	-0.0242915
6003	0.066	0.0115	-0.0015		0.034435	0.115115	-0.0303644
6503	0.074	0.0125	-0.0016		0.0386089	0.125125	-0.0323887
7003	0.074	0.0135	-0.0018		0.0386089	0.135135	-0.0364372
7503	0.082	0.0145	-0.002		0.0427829	0.145145	-0.0404858
8003	0.088	0.0156	-0.0023		0.0459133	0.156156	-0.0465587
8503	0.09	0.0163	-0.0024		0.0469568	0.163163	-0.048583
9003	0.094	0.0172	-0.0025		0.0490438	0.172172	-0.0506073
9503	0.098	0.0183	-0.0028		0.0511308	0.183183	-0.0566802
10003	0.098	0.0192	-0.0029		0.0511308	0.192192	-0.0587045
10503	0.096	0.0203	-0.003		0.0500873	0.203203	-0.0607287
11003	0.064	0.0213	-0.0029		0.0333915	0.213213	-0.0587045
11503	0.064	0.0223	-0.003		0.0333915	0.223223	-0.0607287
12003	0.064	0.0237	-0.003		0.0333915	0.237237	-0.0607287
12503	0.068	0.0246	-0.0031		0.0354785	0.246246	-0.062753
13003	0.072	0.0254	-0.0032		0.0375655	0.254254	-0.0647773
13503	0.078	0.0263	-0.0032		0.0406959	0.263263	-0.0647773
14003	0.086	0.0275	-0.0034		0.0448699	0.275275	-0.0688259
14503	0.094	0.0285	-0.0035		0.0490438	0.285285	-0.0708502
15003	0.098	0.0293	-0.0036		0.0511308	0.293293	-0.0728745
15503	0.098	0.0304	-0.0038		0.0511308	0.304304	-0.0769231
16003	0.1	0.0317	-0.0039		0.0521743	0.317317	-0.0789474
16503	0.042	0.032	-0.0038		0.0219132	0.32032	-0.0769231
17003	0.076	0.0329	-0.0039		0.0396524	0.329329	-0.0789474
17503	0.106	0.0345	-0.0042		0.0553047	0.345345	-0.0850202
18003	0.082	0.0349	-0.0043		0.0427829	0.349349	-0.0870445
18503	0.1	0.0366	-0.0046		0.0521743	0.366366	-0.0931174
19003	0.086	0.0367	-0.0046		0.0448699	0.367367	-0.0931174
19503	0.104	0.0384	-0.0048		0.0542612	0.384384	-0.097166
20003	0.1	0.0392	-0.005		0.0521743	0.392392	-0.101215
20503	0.104	0.0399	-0.0051		0.0542612	0.399399	-0.103239
21003	0.116	0.0411	-0.0052		0.0605221	0.411411	-0.105263
21503	0.122	0.0422	-0.0054		0.0636526	0.422422	-0.109312
22003	0.124	0.0433	-0.0056		0.0646961	0.433433	-0.11336
22503	0.13	0.0443	-0.0058		0.0678265	0.443443	-0.117409
23003	0.136	0.0454	-0.006		0.070957	0.454454	-0.121457
23503	0.138	0.0463	-0.0061		0.0720005	0.463463	-0.123482
24003	0.142	0.0473	-0.0063		0.0740874	0.473473	-0.12753
24503	0.148	0.0484	-0.0065		0.0772179	0.484484	-0.131579
25003	0.152	0.0494	-0.0067		0.0793049	0.494494	-0.135628
25503	0.156	0.0504	-0.0069		0.0813918	0.504505	-0.139676
26003	0.156	0.0513	-0.0071		0.0813918	0.513514	-0.143725
26503	0.164	0.0522	-0.0073		0.0855658	0.522523	-0.147773
27003	0.172	0.0532	-0.0075		0.0897397	0.532533	-0.151822
27503	0.176	0.0542	-0.0077		0.0918267	0.542543	-0.15587
28003	0.184	0.0553	-0.008		0.0960006	0.553554	-0.161943
28503	0.186	0.0564	-0.0082		0.0970441	0.564565	-0.165992
29003	0.196	0.0572	-0.0084		0.102262	0.572573	-0.17004
29503	0.202	0.0582	-0.0086		0.105392	0.582583	-0.174089
30003	0.208	0.0593	-0.0088		0.108522	0.593594	-0.178138
30503	0.212	0.0605	-0.0091		0.110609	0.605606	-0.184211
31003	0.216	0.0613	-0.0093		0.112696	0.613614	-0.188259
31503	0.224	0.0622	-0.0095		0.11687	0.622623	-0.192308
32003	0.23	0.0633	-0.0098		0.120001	0.633634	-0.198381
32503	0.234	0.0642	-0.01		0.122088	0.642643	-0.202429
33003	0.238	0.0652	-0.0103		0.124175	0.652653	-0.208502
33503	0.24	0.0663	-0.0105		0.125218	0.663664	-0.212551
34003	0.24	0.0672	-0.0107		0.125218	0.672673	-0.216599
34503	0.246	0.0683	-0.0109		0.128349	0.683684	-0.220648
35003	0.246	0.0694	-0.0112		0.128349	0.694695	-0.226721
35503	0.254	0.0704	-0.0114		0.132523	0.704705	-0.230769
36003	0.258	0.0715	-0.0116		0.13461	0.715716	-0.234818
36503	0.264	0.0724	-0.0118		0.13774	0.724725	-0.238866
37003	0.272	0.0733	-0.0121		0.141914	0.733734	-0.244939
37503	0.278	0.074	-0.0123		0.145044	0.740741	-0.248988
38003	0.288	0.0749	-0.0127		0.150262	0.74975	-0.257085
38503	0.296	0.0754	-0.0132		0.154436	0.754755	-0.267206
39003	0.312	0.0771	-0.0141		0.162784	0.771772	-0.285425
39503	0.262	0.0786	-0.0148		0.136697	0.786787	-0.299595
40003	0.266	0.0786	-0.0148		0.138784	0.786787	-0.299595
40503	0.23	0.0798	-0.0151		0.120001	0.798799	-0.305668
41003	0.266	0.0817	-0.0155		0.138784	0.817818	-0.313765
41503	0.24	0.0816	-0.0155		0.125218	0.816817	-0.313765
42003	0.234	0.0833	-0.0158		0.122088	0.833834	-0.319838
42503	0.286	0.085	-0.0162		0.149218	0.850851	-0.327935
43003	0.24	0.085	-0.0163		0.125218	0.850851	-0.32996
43503	0.296	0.0868	-0.0166		0.154436	0.868869	-0.336032
44003	0.28	0.0873	-0.0168		0.146088	0.873874	-0.340081
44503	0.286	0.0882	-0.017		0.149218	0.882883	-0.34413
45003	0.296	0.0894	-0.0172		0.154436	0.894895	-0.348178
45503	0.302	0.0906	-0.0175		0.157566	0.906907	-0.354251
46003	0.302	0.0915	-0.0177		0.157566	0.915916	-0.3583
46503	0.3	0.0924	-0.018		0.156523	0.924925	-0.364372
47003	0.306	0.0934	-0.0183		0.159653	0.934935	-0.370445
47503	0.318	0.0944	-0.0185		0.165914	0.944945	-0.374494
48003	0.324	0.0956	-0.0188		0.169045	0.956957	-0.380567
48503	0.328	0.0966	-0.019		0.171132	0.966967	-0.384615
49003	0.336	0.0975	-0.0193		0.175305	0.975976	-0.390688
49503	0.34	0.0985	-0.0196		0.177392	0.985986	-0.396761
50003	0.348	0.0996	-0.0198		0.181566	0.996997	-0.40081
50503	0.35	0.1005	-0.0201		0.18261	1.00601	-0.406883
51003	0.336	0.1015	-0.0204		0.175305	1.01602	-0.412955
51503	0.346	0.1025	-0.0207		0.180523	1.02603	-0.419028
52003	0.352	0.1036	-0.021		0.183653	1.03704	-0.425101
52503	0.36	0.1046	-0.0213		0.187827	1.04705	-0.431174
53003	0.362	0.1056	-0.0215		0.188871	1.05706	-0.435223
53503	0.366	0.1065	-0.0218		0.190958	1.06607	-0.441296
54003	0.356	0.1075	-0.0222		0.18574	1.07608	-0.449393
54503	0.326	0.1081	-0.0228		0.170088	1.08208	-0.461538
55003	0.326	0.1093	-0.0233		0.170088	1.09409	-0.47166
55503	0.32	0.1103	-0.0238		0.166958	1.1041	-0.481781
56003	0.298	0.1111	-0.0244		0.155479	1.11211	-0.493927
56503	0.308	0.1125	-0.0249		0.160697	1.12613	-0.504049
57003	0.316	0.1137	-0.0253		0.164871	1.13814	-0.512146
57503	0.324	0.1149	-0.0256		0.169045	1.15015	-0.518219
58003	0.332	0.1157	-0.0259		0.173219	1.15816	-0.524291
58503	0.338	0.1165	-0.0262		0.176349	1.16617	-0.530364
59003	0.35	0.1176	-0.0263		0.18261	1.17718	-0.532389
59503	0.358	0.1186	-0.0266		0.186784	1.18719	-0.538462
60003	0.362	0.1195	-0.027		0.188871	1.1962	-0.546559
60503	0.366	0.1206	-0.0273		0.190958	1.20721	-0.552632
61003	0.374	0.1215	-0.0277		0.195132	1.21622	-0.560729
61503	0.38	0.1225	-0.0279		0.198262	1.22623	-0.564777
62003	0.376	0.1234	-0.0283		0.196175	1.23524	-0.572874
62503	0.378	0.1244	-0.0287		0.197219	1.24525	-0.580972
63003	0.372	0.1253	-0.0291		0.194088	1.25425	-0.589069
63503	0.364	0.1262	-0.0296		0.189914	1.26326	-0.59919
64003	0.372	0.1274	-0.0301		0.194088	1.27528	-0.609312
64503	0.38	0.1287	-0.0305		0.198262	1.28829	-0.617409
65003	0.394	0.1298	-0.0308		0.205567	1.2993	-0.623482
65503	0.402	0.1309	-0.0311		0.20974	1.31031	-0.629555
66003	0.404	0.1317	-0.0313		0.210784	1.31832	-0.633603
66503	0.41	0.1324	-0.0316		0.213914	1.32533	-0.639676
67003	0.416	0.1334	-0.0319		0.217045	1.33534	-0.645749
67503	0.43	0.1345	-0.0321		0.224349	1.34635	-0.649798
68003	0.438	0.1354	-0.0325		0.228523	1.35536	-0.657895
68503	0.45	0.1366	-0.0327		0.234784	1.36737	-0.661943
69003	0.454	0.1375	-0.0331		0.236871	1.37638	-0.67004
69503	0.464	0.1385	-0.0334		0.242089	1.38639	-0.676113
70003	0.47	0.1393	-0.0337		0.245219	1.39439	-0.682186
70503	0.476	0.1397	-0.0341		0.248349	1.3984	-0.690283
71003	0.528	0.1401	-0.0351		0.27548	1.4024	-0.710526
71503	0.428	0.1427	-0.064		0.223306	1.42843	-1.29555
72003	0.41	0.1438	-0.066		0.213914	1.43944	-1.33603
72503	0.414	0.1449	-0.0667		0.216001	1.45045	-1.3502
73003	0.412	0.1457	-0.0674		0.214958	1.45846	-1.36437
73503	0.418	0.1467	-0.0678		0.218088	1.46847	-1.37247
74003	0.434	0.1479	-0.068		0.226436	1.48048	-1.37652
74503	0.438	0.1488	-0.0683		0.228523	1.48949	-1.38259
75003	0.448	0.1497	-0.0686		0.233741	1.4985	-1.38866
75503	0.456	0.1507	-0.0689		0.237915	1.50851	-1.39474
76003	0.466	0.1517	-0.0693		0.243132	1.51852	-1.40283
76503	0.476	0.1527	-0.0695		0.248349	1.52853	-1.40688
77003	0.484	0.1537	-0.0698		0.252523	1.53854	-1.41296
77503	0.494	0.1547	-0.0701		0.257741	1.54855	-1.41903
78003	0.504	0.1558	-0.0704		0.262958	1.55956	-1.4251
78503	0.51	0.1567	-0.0708		0.266089	1.56857	-1.4332
79003	0.514	0.1577	-0.0712		0.268176	1.57858	-1.4413
79503	0.524	0.1588	-0.0716		0.273393	1.58959	-1.44939
80003	0.532	0.1598	-0.0719		0.277567	1.5996	-1.45547
80503	0.534	0.1607	-0.0723		0.27861	1.60861	-1.46356
81003	0.526	0.1617	-0.0731		0.274437	1.61862	-1.47976
81503	0.524	0.1629	-0.074		0.273393	1.63063	-1.49798
82003	0.522	0.1639	-0.0748		0.27235	1.64064	-1.51417
82503	0.51	0.1647	-0.0758		0.266089	1.64865	-1.53441
83003	0.5	0.1658	-0.0769		0.260871	1.65966	-1.55668
83503	0.49	0.1667	-0.0778		0.255654	1.66867	-1.5749
84003	0.484	0.1678	-0.0788		0.252523	1.67968	-1.59514
84503	0.492	0.169	-0.0795		0.256697	1.69169	-1.60931
85003	0.496	0.1699	-0.08		0.258784	1.7007	-1.61943
85503	0.504	0.171	-0.0804		0.262958	1.71171	-1.62753
86003	0.51	0.1719	-0.0809		0.266089	1.72072	-1.63765
86503	0.514	0.1728	-0.0814		0.268176	1.72973	-1.64777
87003	0.51	0.1738	-0.082		0.266089	1.73974	-1.65992
87503	0.52	0.175	-0.0825		0.271306	1.75175	-1.67004
88003	0.532	0.1761	-0.0829		0.277567	1.76276	-1.67814
88503	0.54	0.177	-0.0832		0.281741	1.77177	-1.68421
89003	0.548	0.1778	-0.0835		0.285915	1.77978	-1.69028
89503	0.556	0.1788	-0.0838		0.290089	1.78979	-1.69636
90003	0.562	0.1798	-0.0844		0.293219	1.7998	-1.7085
90503	0.568	0.1808	-0.0848		0.29635	1.80981	-1.7166
91003	0.572	0.182	-0.0853		0.298437	1.82182	-1.72672
91503	0.574	0.183	-0.0859		0.29948	1.83183	-1.73887
92003	0.574	0.1839	-0.0865		0.29948	1.84084	-1.75101
92503	0.572	0.1848	-0.0871		0.298437	1.84985	-1.76316
93003	0.578	0.1858	-0.0876		0.301567	1.85986	-1.77328
93503	0.59	0.187	-0.088		0.307828	1.87187	-1.78138
94003	0.59	0.1878	-0.0886		0.307828	1.87988	-1.79352
94503	0.594	0.1888	-0.0891		0.309915	1.88989	-1.80364
95003	0.598	0.1898	-0.0896		0.312002	1.8999	-1.81377
95503	0.598	0.1909	-0.0901		0.312002	1.91091	-1.82389
96003	0.594	0.1918	-0.0908		0.309915	1.91992	-1.83806
96503	0.594	0.193	-0.0914		0.309915	1.93193	-1.8502
97003	0.596	0.194	-0.092		0.310959	1.94194	-1.86235
97503	0.6	0.195	-0.0924		0.313046	1.95195	-1.87045
98003	0.608	0.1958	-0.0928		0.317219	1.95996	-1.87854
98503	0.62	0.197	-0.0931		0.32348	1.97197	-1.88462
99003	0.624	0.1979	-0.0934		0.325567	1.98098	-1.89069
99503	0.632	0.199	-0.0937		0.329741	1.99199	-1.89676
100003	0.642	0.2	-0.094		0.334959	2.002	-1.90283
100503	0.65	0.2009	-0.0943		0.339133	2.01101	-1.90891
101003	0.658	0.202	-0.0946		0.343307	2.02202	-1.91498
101503	0.666	0.203	-0.0949		0.347481	2.03203	-1.92105
102003	0.674	0.204	-0.0951		0.351654	2.04204	-1.9251
102503	0.678	0.2049	-0.0955		0.353741	2.05105	-1.9332
103003	0.684	0.2058	-0.0957		0.356872	2.06006	-1.93725
103503	0.69	0.2068	-0.096		0.360002	2.07007	-1.94332
104003	0.704	0.2078	-0.0962		0.367307	2.08008	-1.94737
104503	0.71	0.2089	-0.0965		0.370437	2.09109	-1.95344
105003	0.664	0.2096	-0.0981		0.346437	2.0981	-1.98583
105503	0.652	0.2108	-0.0992		0.340176	2.11011	-2.0081
106003	0.654	0.212	-0.0998		0.34122	2.12212	-2.02024
106503	0.662	0.2129	-0.1004		0.345394	2.13113	-2.03239
107003	0.668	0.214	-0.1008		0.348524	2.14214	-2.04049
107503	0.676	0.215	-0.1012		0.352698	2.15215	-2.04858
108003	0.682	0.2159	-0.1016		0.355828	2.16116	-2.05668
108503	0.688	0.2169	-0.102		0.358959	2.17117	-2.06478
109003	0.694	0.2179	-0.1024		0.362089	2.18118	-2.07287
109503	0.706	0.2188	-0.1028		0.36835	2.19019	-2.08097
110003	0.71	0.2199	-0.1031		0.370437	2.2012	-2.08704
110503	0.718	0.2211	-0.1035		0.374611	2.21321	-2.09514
111003	0.728	0.222	-0.1038		0.379829	2.22222	-2.10121
111503	0.736	0.223	-0.1041		0.384002	2.23223	-2.10729
112003	0.742	0.2239	-0.1044		0.387133	2.24124	-2.11336
112503	0.754	0.2249	-0.1047		0.393394	2.25125	-2.11943
113003	0.762	0.226	-0.105		0.397568	2.26226	-2.12551
113503	0.772	0.227	-0.1052		0.402785	2.27227	-2.12955
114003	0.78	0.2279	-0.1054		0.406959	2.28128	-2.1336
114503	0.79	0.229	-0.1057		0.412177	2.29229	-2.13968
115003	0.798	0.2301	-0.106		0.416351	2.3033	-2.14575
115503	0.8	0.2311	-0.1063		0.417394	2.31331	-2.15182
116003	0.806	0.2319	-0.1066		0.420524	2.32132	-2.15789
116503	0.814	0.233	-0.107		0.424698	2.33233	-2.16599
117003	0.822	0.2342	-0.1072		0.428872	2.34434	-2.17004
117503	0.83	0.2351	-0.1075		0.433046	2.35335	-2.17611
118003	0.838	0.2361	-0.1077		0.43722	2.36336	-2.18016
118503	0.848	0.237	-0.1079		0.442438	2.37237	-2.18421
119003	0.858	0.238	-0.1081		0.447655	2.38238	-2.18826
119503	0.866	0.239	-0.1083		0.451829	2.39239	-2.19231
120003	0.874	0.24	-0.1085		0.456003	2.4024	-2.19636
120503	0.882	0.2408	-0.1088		0.460177	2.41041	-2.20243
121003	0.89	0.2417	-0.1089		0.464351	2.41942	-2.20445
121503	0.898	0.2427	-0.1091		0.468525	2.42943	-2.2085
122003	0.91	0.2437	-0.1092		0.474786	2.43944	-2.21053
122503	0.918	0.2446	-0.1094		0.47896	2.44845	-2.21457
123003	0.922	0.2458	-0.1097		0.481047	2.46046	-2.22065
123503	0.924	0.2468	-0.1101		0.48209	2.47047	-2.22874
124003	0.928	0.2478	-0.1105		0.484177	2.48048	-2.23684
124503	0.932	0.2487	-0.1109		0.486264	2.48949	-2.24494
125003	0.932	0.2496	-0.1113		0.486264	2.4985	-2.25304
125503	0.942	0.2507	-0.1117		0.491481	2.50951	-2.26113
126003	0.946	0.2517	-0.112		0.493568	2.51952	-2.26721
126503	0.95	0.2527	-0.1124		0.495655	2.52953	-2.2753
127003	0.956	0.2538	-0.1127		0.498786	2.54054	-2.28138
127503	0.968	0.2549	-0.113		0.505047	2.55155	-2.28745
128003	0.978	0.2559	-0.1132		0.510264	2.56156	-2.2915
128503	0.986	0.257	-0.1134		0.514438	2.57257	-2.29555
129003	0.976	0.2579	-0.114		0.509221	2.58158	-2.30769
129503	0.98	0.259	-0.1145		0.511308	2.59259	-2.31781
130003	0.982	0.26	-0.1149		0.512351	2.6026	-2.32591
130503	0.986	0.261	-0.1155		0.514438	2.61261	-2.33806
131003	0.986	0.2619	-0.1158		0.514438	2.62162	-2.34413
131503	0.99	0.2628	-0.1162		0.516525	2.63063	-2.35223
132003	0.99	0.2639	-0.1167		0.516525	2.64164	-2.36235
132503	0.996	0.2649	-0.117		0.519656	2.65165	-2.36842
133003	1.002	0.2658	-0.1173		0.522786	2.66066	-2.37449
133503	1.008	0.2668	-0.1177		0.525916	2.67067	-2.38259
134003	1.016	0.2678	-0.1181		0.53009	2.68068	-2.39069
134503	1.02	0.2688	-0.1183		0.532177	2.69069	-2.39474
135003	1.03	0.2699	-0.1186		0.537395	2.7017	-2.40081
135503	1.04	0.2711	-0.1189		0.542612	2.71371	-2.40688
136003	1.046	0.272	-0.119		0.545743	2.72272	-2.40891
136503	1.052	0.2732	-0.1193		0.548873	2.73473	-2.41498
137003	1.004	0.2735	-0.1203		0.523829	2.73774	-2.43522
137503	0.95	0.2751	-0.1207		0.495655	2.75375	-2.44332
138003	1.016	0.2762	-0.1207		0.53009	2.76476	-2.44332
138503	1.008	0.2761	-0.1207		0.525916	2.76376	-2.44332
139003	1.056	0.278	-0.1206		0.55096	2.78278	-2.4413
139503	1.052	0.2783	-0.1207		0.548873	2.78579	-2.44332
140003	1.078	0.2796	-0.1207		0.562438	2.7988	-2.44332
140503	1.094	0.2806	-0.1207		0.570786	2.80881	-2.44332
141003	1.102	0.2816	-0.1207		0.57496	2.81882	-2.44332
141503	1.116	0.2826	-0.1208		0.582265	2.82883	-2.44534
142003	1.128	0.2836	-0.1208		0.588526	2.83884	-2.44534
142503	1.14	0.2847	-0.1209		0.594786	2.84985	-2.44737
143003	1.152	0.2858	-0.121		0.601047	2.86086	-2.44939
143503	1.162	0.2868	-0.1211		0.606265	2.87087	-2.45142
144003	1.174	0.2877	-0.1212		0.612526	2.87988	-2.45344
144503	1.18	0.2886	-0.1214		0.615656	2.88889	-2.45749
145003	1.188	0.2896	-0.1214		0.61983	2.8989	-2.45749
145503	1.202	0.2906	-0.1215		0.627134	2.90891	-2.45951
146003	1.21	0.2917	-0.1217		0.631308	2.91992	-2.46356
146503	1.224	0.2927	-0.1218		0.638613	2.92993	-2.46559
147003	1.234	0.2938	-0.122		0.64383	2.94094	-2.46964
147503	1.244	0.2947	-0.1222		0.649048	2.94995	-2.47368
148003	1.254	0.2958	-0.1223		0.654265	2.96096	-2.47571
148503	1.264	0.2969	-0.1224		0.659483	2.97197	-2.47773
149003	1.264	0.2977	-0.1227		0.659483	2.97998	-2.48381
149503	1.266	0.2987	-0.1231		0.660526	2.98999	-2.4919
150003	1.27	0.2997	-0.1234		0.662613	3	-2.49798
150503	1.28	0.3009	-0.1237		0.66783	3.01201	-2.50405
151003	1.284	0.3019	-0.124		0.669917	3.02202	-2.51012
151503	1.3	0.3031	-0.1241		0.678265	3.03403	-2.51215
152003	1.308	0.304	-0.1243		0.682439	3.04304	-2.51619
152503	1.318	0.305	-0.1244		0.687657	3.05305	-2.51822
153003	1.326	0.3058	-0.1245		0.691831	3.06106	-2.52024
153503	1.334	0.3067	-0.1246		0.696005	3.07007	-2.52227
154003	1.342	0.3076	-0.1248		0.700178	3.07908	-2.52632
154503	1.354	0.3085	-0.1248		0.706439	3.08809	-2.52632
155003	1.37	0.3097	-0.1249		0.714787	3.1001	-2.52834
155503	1.38	0.3109	-0.125		0.720005	3.11211	-2.53036
156003	1.39	0.3117	-0.1251		0.725222	3.12012	-2.53239
156503	1.402	0.3128	-0.1252		0.731483	3.13113	-2.53441
157003	1.412	0.3137	-0.1254		0.7367	3.14014	-2.53846
157503	1.418	0.3145	-0.1255		0.739831	3.14815	-2.54049
158003	1.43	0.3155	-0.1257		0.746092	3.15816	-2.54453
158503	1.44	0.3166	-0.126		0.751309	3.16917	-2.55061
159003	1.448	0.3174	-0.1262		0.755483	3.17718	-2.55466
159503	1.46	0.3183	-0.1264		0.761744	3.18619	-2.5587
160003	1.476	0.319	-0.1267		0.770092	3.19319	-2.56478
160503	1.506	0.3201	-0.1269		0.785744	3.2042	-2.56883
161003	1.538	0.321	-0.1275		0.80244	3.21321	-2.58097
161503	1.6	0.3222	-0.1282		0.834788	3.22523	-2.59514
162003	1.63	0.3235	-0.1306		0.85044	3.23824	-2.64372
162503	1.636	0.3248	-0.1327		0.853571	3.25125	-2.68623
163003	1.648	0.3257	-0.1335		0.859832	3.26026	-2.70243
163503	1.664	0.327	-0.134		0.86818	3.27327	-2.71255
164003	1.668	0.3281	-0.1346		0.870267	3.28428	-2.7247
164503	1.664	0.329	-0.1352		0.86818	3.29329	-2.73684
165003	1.666	0.3301	-0.1356		0.869223	3.3043	-2.74494
165503	1.656	0.3313	-0.1361		0.864006	3.31632	-2.75506
166003	1.6	0.3316	-0.1368		0.834788	3.31932	-2.76923
166503	1.686	0.3332	-0.1367		0.879658	3.33534	-2.76721
167003	1.642	0.3334	-0.1369		0.856701	3.33734	-2.77126
167503	1.716	0.3352	-0.1368		0.89531	3.35536	-2.76923
168003	1.672	0.3353	-0.137		0.872353	3.35636	-2.77328
168503	1.736	0.337	-0.1369		0.905745	3.37337	-2.77126
169003	1.744	0.3381	-0.137		0.909919	3.38438	-2.77328
169503	1.756	0.3389	-0.137		0.91618	3.39239	-2.77328
170003	1.764	0.3398	-0.137		0.920354	3.4014	-2.77328
170503	1.778	0.3408	-0.137		0.927658	3.41141	-2.77328
171003	1.792	0.3417	-0.137		0.934963	3.42042	-2.77328
171503	1.802	0.3427	-0.1371		0.94018	3.43043	-2.7753
172003	1.812	0.3438	-0.1371		0.945397	3.44144	-2.7753
172503	1.824	0.3447	-0.1372		0.951658	3.45045	-2.77733
173003	1.838	0.3457	-0.1372		0.958963	3.46046	-2.77733
173503	1.85	0.3468	-0.1373		0.965224	3.47147	-2.77935
174003	1.864	0.3478	-0.1373		0.972528	3.48148	-2.77935
174503	1.878	0.3487	-0.1374		0.979832	3.49049	-2.78138
175003	1.896	0.3497	-0.1374		0.989224	3.5005	-2.78138
175503	1.91	0.3507	-0.1375		0.996528	3.51051	-2.7834
176003	1.92	0.3515	-0.1376		1.00175	3.51852	-2.78543
176503	1.936	0.3524	-0.1376		1.01009	3.52753	-2.78543
177003	1.952	0.3534	-0.1377		1.01844	3.53754	-2.78745
177503	1.97	0.3545	-0.1378		1.02783	3.54855	-2.78947
178003	1.988	0.3554	-0.1379		1.03722	3.55756	-2.7915
178503	2.006	0.3563	-0.1382		1.04662	3.56657	-2.79757
179003	2.024	0.3572	-0.1384		1.05601	3.57558	-2.80162
179503	2.042	0.3581	-0.1387		1.0654	3.58458	-2.80769
180003	2.074	0.3593	-0.139		1.08209	3.5966	-2.81377
180503	2.112	0.3606	-0.1393		1.10192	3.60961	-2.81984
181003	2.142	0.3615	-0.1396		1.11757	3.61862	-2.82591
181503	2.17	0.3623	-0.14		1.13218	3.62663	-2.83401
182003	2.202	0.3632	-0.1404		1.14888	3.63564	-2.84211
182503	2.236	0.3643	-0.1409		1.16662	3.64665	-2.85223
183003	2.268	0.3654	-0.1413		1.18331	3.65766	-2.86032
183503	2.3	0.3666	-0.1416		1.20001	3.66967	-2.8664
184003	2.33	0.3677	-0.1419		1.21566	3.68068	-2.87247
184503	2.354	0.369	-0.1422		1.22818	3.69369	-2.87854
185003	2.378	0.3703	-0.1424		1.2407	3.70671	-2.88259
185503	2.4	0.3713	-0.1427		1.25218	3.71672	-2.88866
186003	2.414	0.3722	-0.1428		1.25949	3.72573	-2.89069
186503	2.43	0.3732	-0.143		1.26783	3.73574	-2.89474
187003	2.442	0.3744	-0.1432		1.2741	3.74775	-2.89879
187503	2.45	0.3755	-0.1434		1.27827	3.75876	-2.90283
188003	2.454	0.3766	-0.1437		1.28036	3.76977	-2.90891
188503	2.46	0.3775	-0.1439		1.28349	3.77878	-2.91296
189003	2.468	0.3785	-0.144		1.28766	3.78879	-2.91498
189503	2.47	0.379	-0.1441		1.2887	3.79379	-2.917
190003	2.476	0.3798	-0.1442		1.29183	3.8018	-2.91903
190503	2.492	0.3809	-0.1443		1.30018	3.81281	-2.92105
191003	2.504	0.3817	-0.1442		1.30644	3.82082	-2.91903
191503	2.52	0.383	-0.1442		1.31479	3.83383	-2.91903
192003	2.53	0.384	-0.1443		1.32001	3.84384	-2.92105
192503	2.538	0.385	-0.1444		1.32418	3.85385	-2.92308
193003	2.548	0.386	-0.1444		1.3294	3.86386	-2.92308
193503	2.558	0.3869	-0.1445		1.33462	3.87287	-2.9251
194003	2.57	0.388	-0.1445		1.34088	3.88388	-2.9251
194503	2.582	0.3889	-0.1446		1.34714	3.89289	-2.92713
195003	2.596	0.39	-0.1446		1.35444	3.9039	-2.92713
195503	2.61	0.3909	-0.1446		1.36175	3.91291	-2.92713
196003	2.628	0.3921	-0.1446		1.37114	3.92492	-2.92713
196503	2.642	0.3931	-0.1445		1.37844	3.93493	-2.9251
197003	2.656	0.394	-0.1445		1.38575	3.94394	-2.9251
197503	2.672	0.395	-0.1445		1.3941	3.95395	-2.9251
198003	2.686	0.3961	-0.1444		1.4014	3.96496	-2.92308
198503	2.7	0.3969	-0.1445		1.4087	3.97297	-2.9251
199003	2.716	0.3979	-0.1444		1.41705	3.98298	-2.92308
199503	2.73	0.399	-0.1444		1.42436	3.99399	-2.92308
200003	2.742	0.4	-0.1444		1.43062	4.004	-2.92308
200503	2.758	0.4009	-0.1443		1.43897	4.01301	-2.92105
201003	2.774	0.4019	-0.1443		1.44731	4.02302	-2.92105
201503	2.788	0.4029	-0.1443		1.45462	4.03303	-2.92105
202003	2.804	0.404	-0.1442		1.46297	4.04404	-2.91903
202503	2.816	0.405	-0.1443		1.46923	4.05405	-2.92105
203003	2.83	0.4059	-0.1442		1.47653	4.06306	-2.91903
203503	2.85	0.407	-0.1442		1.48697	4.07407	-2.91903
204003	2.864	0.4079	-0.1441		1.49427	4.08308	-2.917
204503	2.88	0.4091	-0.1441		1.50262	4.0951	-2.917
205003	2.894	0.41	-0.1441		1.50992	4.1041	-2.917
205503	2.908	0.411	-0.144		1.51723	4.11411	-2.91498
206003	2.922	0.4119	-0.144		1.52453	4.12312	-2.91498
206503	2.94	0.413	-0.144		1.53392	4.13413	-2.91498
207003	2.952	0.4139	-0.1439		1.54018	4.14314	-2.91296
207503	2.97	0.4149	-0.1439		1.54958	4.15315	-2.91296
208003	2.984	0.4159	-0.1438		1.55688	4.16316	-2.91093
208503	3	0.4169	-0.1438		1.56523	4.17317	-2.91093
209003	3.014	0.4179	-0.1438		1.57253	4.18318	-2.91093
209503	3.03	0.4188	-0.1438		1.58088	4.19219	-2.91093
210003	3.048	0.4199	-0.1437		1.59027	4.2032	-2.90891
210503	3.066	0.4207	-0.1437		1.59966	4.21121	-2.90891
211003	3.082	0.4218	-0.1437		1.60801	4.22222	-2.90891
211503	3.1	0.4227	-0.1437		1.6174	4.23123	-2.90891
212003	3.116	0.4236	-0.1437		1.62575	4.24024	-2.90891
212503	3.136	0.4245	-0.1437		1.63618	4.24925	-2.90891
213003	3.16	0.4254	-0.1436		1.64871	4.25826	-2.90688
213503	3.184	0.4265	-0.1436		1.66123	4.26927	-2.90688
214003	3.212	0.4273	-0.1435		1.67584	4.27728	-2.90486
214503	3.236	0.4285	-0.1434		1.68836	4.28929	-2.90283
215003	3.262	0.4292	-0.1434		1.70192	4.2963	-2.90283
215503	3.286	0.43	-0.1433		1.71445	4.3043	-2.90081
216003	3.316	0.431	-0.1433		1.7301	4.31431	-2.90081
216503	3.34	0.4321	-0.1433		1.74262	4.32533	-2.90081
217003	3.368	0.4333	-0.1434		1.75723	4.33734	-2.90283
217503	3.396	0.4344	-0.1433		1.77184	4.34835	-2.90081
218003	3.42	0.4356	-0.1433		1.78436	4.36036	-2.90081
218503	3.446	0.4368	-0.1434		1.79792	4.37237	-2.90283
219003	3.464	0.438	-0.1434		1.80732	4.38438	-2.90283
219503	3.482	0.4391	-0.1435		1.81671	4.3954	-2.90486
220003	3.504	0.4401	-0.1435		1.82819	4.40541	-2.90486
220503	3.52	0.4411	-0.1435		1.83653	4.41542	-2.90486
221003	3.538	0.4423	-0.1435		1.84592	4.42743	-2.90486
221503	3.554	0.4432	-0.1434		1.85427	4.43644	-2.90283
222003	3.574	0.4443	-0.1435		1.86471	4.44745	-2.90486
222503	3.588	0.4454	-0.1435		1.87201	4.45846	-2.90486
223003	3.604	0.4463	-0.1435		1.88036	4.46747	-2.90486
223503	3.614	0.4471	-0.1435		1.88558	4.47548	-2.90486
224003	3.628	0.448	-0.1434		1.89288	4.48448	-2.90283
224503	3.642	0.4491	-0.1435		1.90019	4.4955	-2.90486
225003	3.662	0.4501	-0.1434		1.91062	4.50551	-2.90283
225503	3.678	0.4511	-0.1434		1.91897	4.51552	-2.90283
226003	3.696	0.4522	-0.1433		1.92836	4.52653	-2.90081
226503	3.716	0.4532	-0.1432		1.9388	4.53654	-2.89879
227003	3.73	0.4542	-0.1431		1.9461	4.54655	-2.89676
227503	3.742	0.4552	-0.1431		1.95236	4.55656	-2.89676
228003	3.76	0.4561	-0.1431		1.96175	4.56557	-2.89676
228503	3.774	0.4572	-0.143		1.96906	4.57658	-2.89474
229003	3.792	0.4582	-0.1429		1.97845	4.58659	-2.89271
229503	3.806	0.459	-0.1429		1.98575	4.59459	-2.89271
230003	3.822	0.46	-0.1428		1.9941	4.6046	-2.89069
230503	3.836	0.4612	-0.1428		2.0014	4.61662	-2.89069
231003	3.85	0.4621	-0.1428		2.00871	4.62563	-2.89069
231503	3.862	0.4631	-0.1427		2.01497	4.63564	-2.88866
232003	3.876	0.4642	-0.1427		2.02227	4.64665	-2.88866
232503	3.89	0.4652	-0.1426		2.02958	4.65666	-2.88664
233003	3.904	0.466	-0.1426		2.03688	4.66466	-2.88664
233503	3.912	0.4669	-0.1426		2.04106	4.67367	-2.88664
234003	3.922	0.4679	-0.1426		2.04627	4.68368	-2.88664
234503	3.938	0.4688	-0.1425		2.05462	4.69269	-2.88462
235003	3.954	0.4696	-0.1425		2.06297	4.7007	-2.88462
235503	3.972	0.4709	-0.1424		2.07236	4.71371	-2.88259
236003	3.988	0.4718	-0.1423		2.08071	4.72272	-2.88057
236503	4.002	0.4728	-0.1422		2.08801	4.73273	-2.87854
237003	4.018	0.4739	-0.1422		2.09636	4.74374	-2.87854
237503	4.034	0.4749	-0.1421		2.10471	4.75375	-2.87652
238003	4.05	0.4759	-0.142		2.11306	4.76376	-2.87449
238503	4.066	0.4771	-0.142		2.12141	4.77578	-2.87449
239003	4.084	0.478	-0.1418		2.1308	4.78478	-2.87045
239503	4.098	0.479	-0.1418		2.1381	4.79479	-2.87045
240003	4.112	0.48	-0.1418		2.14541	4.8048	-2.87045
240503	4.13	0.481	-0.1417		2.1548	4.81481	-2.86842
241003	4.146	0.4819	-0.1416		2.16314	4.82382	-2.8664
241503	4.164	0.483	-0.1415		2.17254	4.83483	-2.86437
242003	4.18	0.484	-0.1415		2.18088	4.84484	-2.86437
242503	4.192	0.4849	-0.1413		2.18714	4.85385	-2.86032
243003	4.204	0.4858	-0.1413		2.19341	4.86286	-2.86032
243503	4.224	0.4869	-0.1412		2.20384	4.87387	-2.8583
244003	4.242	0.4877	-0.1411		2.21323	4.88188	-2.85628
244503	4.26	0.4888	-0.141		2.22262	4.89289	-2.85425
245003	4.278	0.49	-0.1409		2.23201	4.9049	-2.85223
245503	4.296	0.4908	-0.1408		2.24141	4.91291	-2.8502
246003	4.312	0.4919	-0.1406		2.24975	4.92392	-2.84615
246503	4.33	0.4928	-0.1406		2.25915	4.93293	-2.84615
247003	4.35	0.4938	-0.1405		2.26958	4.94294	-2.84413
247503	4.366	0.495	-0.1403		2.27793	4.95495	-2.84008
248003	4.386	0.4958	-0.1403		2.28836	4.96296	-2.84008
248503	4.406	0.4969	-0.1401		2.2988	4.97397	-2.83603
249003	4.422	0.4979	-0.1401		2.30715	4.98398	-2.83603
249503	4.44	0.4989	-0.14		2.31654	4.99399	-2.83401
250003	4.456	0.4999	-0.1399		2.32488	5.004	-2.83198
250503	4.474	0.501	-0.1398		2.33428	5.01502	-2.82996
251003	4.492	0.5018	-0.1397		2.34367	5.02302	-2.82794
251503	4.506	0.5029	-0.1396		2.35097	5.03403	-2.82591
252003	4.522	0.504	-0.1396		2.35932	5.04505	-2.82591
252503	4.534	0.505	-0.1395		2.36558	5.05506	-2.82389
253003	4.55	0.506	-0.1394		2.37393	5.06507	-2.82186
253503	4.566	0.5069	-0.1393		2.38228	5.07407	-2.81984
254003	4.586	0.508	-0.1392		2.39271	5.08509	-2.81781
254503	4.602	0.5088	-0.1391		2.40106	5.09309	-2.81579
255003	4.618	0.5099	-0.139		2.40941	5.1041	-2.81377
255503	4.636	0.5109	-0.1389		2.4188	5.11411	-2.81174
256003	4.654	0.512	-0.1388		2.42819	5.12513	-2.80972
256503	4.67	0.5129	-0.1388		2.43654	5.13413	-2.80972
257003	4.69	0.5139	-0.1387		2.44697	5.14414	-2.80769
257503	4.704	0.515	-0.1386		2.45428	5.15516	-2.80567
258003	4.724	0.5159	-0.1385		2.46471	5.16416	-2.80364
258503	4.74	0.5169	-0.1384		2.47306	5.17417	-2.80162
259003	4.76	0.518	-0.1383		2.48349	5.18519	-2.7996
259503	4.776	0.5191	-0.1382		2.49184	5.1962	-2.79757
260003	4.794	0.52	-0.1381		2.50123	5.20521	-2.79555
260503	4.808	0.5208	-0.138		2.50854	5.21321	-2.79352
261003	4.826	0.5219	-0.1379		2.51793	5.22422	-2.7915
261503	4.848	0.523	-0.1378		2.52941	5.23524	-2.78947
262003	4.864	0.5238	-0.1377		2.53776	5.24324	-2.78745
262503	4.888	0.5249	-0.1376		2.55028	5.25425	-2.78543
263003	4.906	0.526	-0.1375		2.55967	5.26527	-2.7834
263503	4.924	0.5271	-0.1374		2.56906	5.27628	-2.78138
264003	4.94	0.5281	-0.1373		2.57741	5.28629	-2.77935
264503	4.96	0.5291	-0.1372		2.58784	5.2963	-2.77733
265003	4.976	0.5299	-0.1371		2.59619	5.3043	-2.7753
265503	4.996	0.5311	-0.137		2.60663	5.31632	-2.77328
266003	5.012	0.5319	-0.1369		2.61497	5.32432	-2.77126
266503	5.03	0.533	-0.1368		2.62436	5.33534	-2.76923
267003	5.05	0.5339	-0.1366		2.6348	5.34434	-2.76518
267503	5.07	0.535	-0.1366		2.64523	5.35536	-2.76518
268003	5.086	0.536	-0.1365		2.65358	5.36537	-2.76316
268503	5.106	0.5371	-0.1364		2.66402	5.37638	-2.76113
269003	5.122	0.538	-0.1363		2.67237	5.38539	-2.75911
269503	5.14	0.539	-0.1362		2.68176	5.3954	-2.75709
270003	5.16	0.5399	-0.1361		2.69219	5.4044	-2.75506
270503	5.176	0.5411	-0.136		2.70054	5.41642	-2.75304
271003	5.192	0.5419	-0.1359		2.70889	5.42442	-2.75101
271503	5.212	0.5431	-0.1358		2.71932	5.43644	-2.74899
272003	5.23	0.5439	-0.1357		2.72871	5.44444	-2.74696
272503	5.246	0.5449	-0.1356		2.73706	5.45445	-2.74494
273003	5.266	0.5459	-0.1355		2.7475	5.46446	-2.74291
273503	5.282	0.5469	-0.1354		2.75584	5.47447	-2.74089
274003	5.298	0.5479	-0.1353		2.76419	5.48448	-2.73887
274503	5.32	0.549	-0.1352		2.77567	5.4955	-2.73684
275003	5.334	0.55	-0.1352		2.78297	5.50551	-2.73684
275503	5.354	0.551	-0.1351		2.79341	5.51552	-2.73482
276003	5.368	0.5518	-0.1349		2.80071	5.52352	-2.73077
276503	5.388	0.553	-0.1348		2.81115	5.53554	-2.72874
277003	5.408	0.5539	-0.1348		2.82158	5.54454	-2.72874
277503	5.426	0.555	-0.1346		2.83097	5.55556	-2.7247
278003	5.444	0.5559	-0.1346		2.84037	5.56456	-2.7247
278503	5.462	0.5569	-0.1345		2.84976	5.57457	-2.72267
279003	5.478	0.5579	-0.1344		2.85811	5.58458	-2.72065
279503	5.494	0.559	-0.1343		2.86645	5.5956	-2.71862
280003	5.512	0.56	-0.1342		2.87584	5.60561	-2.7166
280503	5.53	0.5608	-0.1341		2.88524	5.61361	-2.71457
281003	5.548	0.5619	-0.134		2.89463	5.62462	-2.71255
281503	5.568	0.5629	-0.1339		2.90506	5.63463	-2.71053
282003	5.59	0.5638	-0.1339		2.91654	5.64364	-2.71053
282503	5.606	0.5649	-0.1337		2.92489	5.65465	-2.70648
283003	5.632	0.566	-0.1336		2.93845	5.66567	-2.70445
283503	5.656	0.567	-0.1335		2.95098	5.67568	-2.70243
284003	5.678	0.5681	-0.1333		2.96245	5.68669	-2.69838
284503	5.702	0.5692	-0.1332		2.97498	5.6977	-2.69636
285003	5.724	0.5704	-0.1331		2.98645	5.70971	-2.69433
285503	5.742	0.5715	-0.133		2.99585	5.72072	-2.69231
286003	5.756	0.5724	-0.1329		3.00315	5.72973	-2.69028
286503	5.776	0.5734	-0.1327		3.01358	5.73974	-2.68623
287003	5.794	0.5744	-0.1327		3.02298	5.74975	-2.68623
287503	5.812	0.5755	-0.1325		3.03237	5.76076	-2.68219
288003	5.832	0.5764	-0.1325		3.0428	5.76977	-2.68219
288503	5.852	0.5773	-0.1323		3.05324	5.77878	-2.67814
289003	5.872	0.5783	-0.1322		3.06367	5.78879	-2.67611
289503	5.888	0.5795	-0.1322		3.07202	5.8008	-2.67611
290003	5.906	0.5805	-0.132		3.08141	5.81081	-2.67206
290503	5.924	0.5814	-0.1319		3.0908	5.81982	-2.67004
291003	5.944	0.5823	-0.1318		3.10124	5.82883	-2.66802
291503	5.96	0.5833	-0.1317		3.10959	5.83884	-2.66599
292003	5.98	0.5843	-0.1316		3.12002	5.84885	-2.66397
292503	6	0.5853	-0.1315		3.13046	5.85886	-2.66194
293003	6.018	0.5863	-0.1314		3.13985	5.86887	-2.65992
293503	6.036	0.5874	-0.1313		3.14924	5.87988	-2.65789
294003	6.056	0.5883	-0.1312		3.15967	5.88889	-2.65587
294503	6.072	0.5893	-0.1311		3.16802	5.8989	-2.65385
295003	6.086	0.5902	-0.131		3.17532	5.90791	-2.65182
295503	6.104	0.5911	-0.1309		3.18472	5.91692	-2.6498
296003	6.124	0.5922	-0.1308		3.19515	5.92793	-2.64777
296503	6.142	0.593	-0.1307		3.20454	5.93594	-2.64575
297003	6.16	0.594	-0.1306		3.21393	5.94595	-2.64372
297503	6.18	0.5949	-0.1305		3.22437	5.95495	-2.6417
298003	6.204	0.5959	-0.1304		3.23689	5.96496	-2.63968
298503	6.222	0.597	-0.1303		3.24628	5.97598	-2.63765
299003	6.242	0.5981	-0.1302		3.25672	5.98699	-2.63563
299503	6.266	0.599	-0.13		3.26924	5.996	-2.63158
300003	6.288	0.6	-0.1299		3.28072	6.00601	-2.62955
300503	6.306	0.601	-0.1298		3.29011	6.01602	-2.62753
301003	6.326	0.602	-0.1297		3.30054	6.02603	-2.62551
301503	6.344	0.603	-0.1296		3.30993	6.03604	-2.62348
302003	6.362	0.6041	-0.1295		3.31933	6.04705	-2.62146
302503	6.38	0.605	-0.1294		3.32872	6.05606	-2.61943
303003	6.4	0.606	-0.1293		3.33915	6.06607	-2.61741
303503	6.418	0.607	-0.1291		3.34854	6.07608	-2.61336
304003	6.432	0.6078	-0.1291		3.35585	6.08408	-2.61336
304503	6.45	0.6087	-0.129		3.36524	6.09309	-2.61134
305003	6.466	0.6096	-0.1289		3.37359	6.1021	-2.60931
305503	6.492	0.6106	-0.1288		3.38715	6.11211	-2.60729
306003	6.514	0.6118	-0.1286		3.39863	6.12412	-2.60324
306503	6.538	0.613	-0.1286		3.41115	6.13614	-2.60324
307003	6.556	0.6139	-0.1285		3.42054	6.14515	-2.60121
307503	6.574	0.6149	-0.1283		3.42994	6.15516	-2.59717
308003	6.592	0.616	-0.1282		3.43933	6.16617	-2.59514
308503	6.608	0.6169	-0.1282		3.44767	6.17518	-2.59514
309003	6.626	0.6179	-0.1281		3.45707	6.18519	-2.59312
309503	6.642	0.6188	-0.128		3.46541	6.19419	-2.59109
310003	6.664	0.6199	-0.1279		3.47689	6.20521	-2.58907
310503	6.68	0.621	-0.1278		3.48524	6.21622	-2.58704
311003	6.704	0.6219	-0.1277		3.49776	6.22523	-2.58502
311503	6.722	0.6229	-0.1276		3.50715	6.23524	-2.583
312003	6.74	0.6239	-0.1275		3.51654	6.24525	-2.58097
312503	6.756	0.6248	-0.1273		3.52489	6.25425	-2.57692
313003	6.772	0.6259	-0.1273		3.53324	6.26527	-2.57692
313503	6.788	0.6267	-0.1272		3.54159	6.27327	-2.5749
314003	6.804	0.6276	-0.1271		3.54994	6.28228	-2.57287
314503	6.824	0.6285	-0.127		3.56037	6.29129	-2.57085
315003	6.85	0.6297	-0.1269		3.57394	6.3033	-2.56883
315503	6.876	0.6306	-0.1267		3.5875	6.31231	-2.56478
316003	6.902	0.6318	-0.1266		3.60107	6.32432	-2.56275
316503	6.926	0.6328	-0.1264		3.61359	6.33433	-2.5587
317003	6.95	0.6337	-0.1263		3.62611	6.34334	-2.55668
317503	6.968	0.6348	-0.1262		3.6355	6.35435	-2.55466
318003	6.992	0.6359	-0.126		3.64802	6.36537	-2.55061
318503	7.012	0.6369	-0.1259		3.65846	6.37538	-2.54858
319003	7.032	0.6378	-0.1258		3.66889	6.38438	-2.54656
319503	7.056	0.639	-0.1257		3.68142	6.3964	-2.54453
320003	7.076	0.64	-0.1255		3.69185	6.40641	-2.54049
320503	7.094	0.6408	-0.1254		3.70124	6.41441	-2.53846
321003	7.114	0.642	-0.1253		3.71168	6.42643	-2.53644
321503	7.136	0.6428	-0.1252		3.72315	6.43443	-2.53441
322003	7.158	0.6439	-0.125		3.73463	6.44545	-2.53036
322503	7.18	0.6447	-0.1248		3.74611	6.45345	-2.52632
323003	7.202	0.6458	-0.1248		3.75759	6.46446	-2.52632
323503	7.226	0.6469	-0.1246		3.77011	6.47548	-2.52227
324003	7.248	0.6479	-0.1244		3.78159	6.48549	-2.51822
324503	7.266	0.6487	-0.1243		3.79098	6.49349	-2.51619
325003	7.294	0.6498	-0.1242		3.80559	6.5045	-2.51417
325503	7.314	0.6507	-0.124		3.81602	6.51351	-2.51012
326003	7.34	0.6518	-0.1239		3.82959	6.52452	-2.5081
326503	7.362	0.6528	-0.1237		3.84107	6.53453	-2.50405
327003	7.384	0.6537	-0.1236		3.85255	6.54354	-2.50202
327503	7.404	0.6548	-0.1235		3.86298	6.55455	-2.5
328003	7.43	0.6559	-0.1234		3.87655	6.56557	-2.49798
328503	7.45	0.6568	-0.1232		3.88698	6.57457	-2.49393
329003	7.472	0.6578	-0.123		3.89846	6.58458	-2.48988
329503	7.494	0.6587	-0.1229		3.90994	6.59359	-2.48785
330003	7.518	0.6598	-0.1228		3.92246	6.6046	-2.48583
330503	7.542	0.6608	-0.1226		3.93498	6.61461	-2.48178
331003	7.566	0.6618	-0.1225		3.9475	6.62462	-2.47976
331503	7.588	0.6626	-0.1224		3.95898	6.63263	-2.47773
332003	7.612	0.6638	-0.1222		3.9715	6.64464	-2.47368
332503	7.634	0.6648	-0.1221		3.98298	6.65465	-2.47166
333003	7.654	0.6658	-0.122		3.99342	6.66466	-2.46964
333503	7.678	0.6667	-0.1218		4.00594	6.67367	-2.46559
334003	7.704	0.6677	-0.1216		4.0195	6.68368	-2.46154
334503	7.728	0.6686	-0.1215		4.03203	6.69269	-2.45951
335003	7.75	0.6698	-0.1214		4.0435	6.7047	-2.45749
335503	7.774	0.6707	-0.1212		4.05603	6.71371	-2.45344
336003	7.788	0.6716	-0.1211		4.06333	6.72272	-2.45142
336503	7.814	0.6726	-0.121		4.0769	6.73273	-2.44939
337003	7.844	0.6736	-0.1208		4.09255	6.74274	-2.44534
337503	7.872	0.6747	-0.1206		4.10716	6.75375	-2.4413
338003	7.896	0.6758	-0.1204		4.11968	6.76476	-2.43725
338503	7.922	0.6769	-0.1203		4.13324	6.77578	-2.43522
339003	7.946	0.6778	-0.1201		4.14577	6.78478	-2.43117
339503	7.97	0.6788	-0.12		4.15829	6.79479	-2.42915
340003	7.994	0.6798	-0.1198		4.17081	6.8048	-2.4251
340503	8.018	0.681	-0.1197		4.18333	6.81682	-2.42308
341003	8.038	0.6819	-0.1196		4.19377	6.82583	-2.42105
341503	8.054	0.6827	-0.1194		4.20211	6.83383	-2.417
342003	8.08	0.6837	-0.1193		4.21568	6.84384	-2.41498
342503	8.108	0.6847	-0.1192		4.23029	6.85385	-2.41296
343003	8.13	0.6857	-0.119		4.24177	6.86386	-2.40891
343503	8.154	0.6867	-0.1188		4.25429	6.87387	-2.40486
344003	8.18	0.6878	-0.1187		4.26785	6.88488	-2.40283
344503	8.204	0.6888	-0.1185		4.28038	6.89489	-2.39879
345003	8.23	0.6897	-0.1184		4.29394	6.9039	-2.39676
345503	8.254	0.6908	-0.1183		4.30646	6.91491	-2.39474
346003	8.276	0.6917	-0.1181		4.31794	6.92392	-2.39069
346503	8.3	0.6928	-0.118		4.33046	6.93493	-2.38866
347003	8.322	0.6937	-0.1179		4.34194	6.94394	-2.38664
347503	8.348	0.6948	-0.1177		4.35551	6.95495	-2.38259
348003	8.37	0.6957	-0.1176		4.36698	6.96396	-2.38057
348503	8.396	0.6967	-0.1175		4.38055	6.97397	-2.37854
349003	8.424	0.6978	-0.1174		4.39516	6.98498	-2.37652
349503	8.448	0.6988	-0.1172		4.40768	6.99499	-2.37247
350003	8.474	0.6999	-0.117		4.42125	7.00601	-2.36842
350503	8.498	0.7009	-0.1169		4.43377	7.01602	-2.3664
351003	8.524	0.7019	-0.1167		4.44733	7.02603	-2.36235
351503	8.546	0.7029	-0.1166		4.45881	7.03604	-2.36032
352003	8.568	0.7039	-0.1165		4.47029	7.04605	-2.3583
352503	8.59	0.7049	-0.1163		4.48177	7.05606	-2.35425
353003	8.614	0.706	-0.1162		4.49429	7.06707	-2.35223
353503	8.636	0.7069	-0.1161		4.50577	7.07608	-2.3502
354003	8.656	0.7079	-0.1159		4.5162	7.08609	-2.34615
354503	8.682	0.709	-0.1158		4.52977	7.0971	-2.34413
355003	8.706	0.7099	-0.1157		4.54229	7.10611	-2.34211
355503	8.728	0.7109	-0.1155		4.55377	7.11612	-2.33806
356003	8.752	0.7118	-0.1154		4.56629	7.12513	-2.33603
356503	8.778	0.7128	-0.1152		4.57986	7.13514	-2.33198
357003	8.804	0.7137	-0.1151		4.59342	7.14414	-2.32996
357503	8.828	0.7147	-0.1149		4.60594	7.15415	-2.32591
358003	8.856	0.7158	-0.1148		4.62055	7.16517	-2.32389
358503	8.88	0.7168	-0.1147		4.63307	7.17518	-2.32186
359003	8.904	0.7178	-0.1145		4.6456	7.18519	-2.31781
359503	8.93	0.7187	-0.1143		4.65916	7.19419	-2.31377
360003	8.954	0.7197	-0.1142		4.67168	7.2042	-2.31174
360503	8.978	0.7207	-0.114		4.6842	7.21421	-2.30769
361003	9.002	0.7217	-0.1139		4.69673	7.22422	-2.30567
361503	9.028	0.7227	-0.1138		4.71029	7.23423	-2.30364
362003	9.052	0.7236	-0.1136		4.72281	7.24324	-2.2996
362503	9.072	0.7247	-0.1134		4.73325	7.25425	-2.29555
363003	9.098	0.7256	-0.1133		4.74681	7.26326	-2.29352
363503	9.12	0.7266	-0.1132		4.75829	7.27327	-2.2915
364003	9.146	0.7276	-0.113		4.77186	7.28328	-2.28745
364503	9.172	0.7287	-0.1129		4.78542	7.29429	-2.28543
365003	9.2	0.7296	-0.1127		4.80003	7.3033	-2.28138
365503	9.222	0.7306	-0.1126		4.81151	7.31331	-2.27935
366003	9.248	0.7316	-0.1125		4.82507	7.32332	-2.27733
366503	9.274	0.7327	-0.1123		4.83864	7.33433	-2.27328
367003	9.296	0.7336	-0.1121		4.85012	7.34334	-2.26923
367503	9.324	0.7345	-0.112		4.86473	7.35235	-2.26721
368003	9.348	0.7356	-0.1118		4.87725	7.36336	-2.26316
368503	9.374	0.7366	-0.1116		4.89081	7.37337	-2.25911
369003	9.402	0.7374	-0.1115		4.90542	7.38138	-2.25709
369503	9.424	0.7384	-0.1114		4.9169	7.39139	-2.25506
370003	9.452	0.7395	-0.1112		4.93151	7.4024	-2.25101
370503	9.476	0.7405	-0.111		4.94403	7.41241	-2.24696
371003	9.502	0.7416	-0.1109		4.9576	7.42342	-2.24494
371503	9.53	0.7426	-0.1108		4.97221	7.43343	-2.24291
372003	9.55	0.7435	-0.1106		4.98264	7.44244	-2.23887
372503	9.578	0.7444	-0.1105		4.99725	7.45145	-2.23684
373003	9.604	0.7454	-0.1103		5.01082	7.46146	-2.23279
373503	9.632	0.7464	-0.1102		5.02542	7.47147	-2.23077
374003	9.66	0.7475	-0.11		5.04003	7.48248	-2.22672
374503	9.684	0.7485	-0.1098		5.05255	7.49249	-2.22267
375003	9.71	0.7494	-0.1097		5.06612	7.5015	-2.22065
375503	9.738	0.7504	-0.1096		5.08073	7.51151	-2.21862
376003	9.768	0.7514	-0.1094		5.09638	7.52152	-2.21457
376503	9.792	0.7524	-0.1093		5.1089	7.53153	-2.21255
377003	9.818	0.7535	-0.1091		5.12247	7.54254	-2.2085
377503	9.844	0.7544	-0.1089		5.13603	7.55155	-2.20445
378003	9.872	0.7555	-0.1088		5.15064	7.56256	-2.20243
378503	9.896	0.7565	-0.1086		5.16316	7.57257	-2.19838
379003	9.93	0.7577	-0.1085		5.1809	7.58458	-2.19636
379503	9.962	0.7586	-0.1083		5.1976	7.59359	-2.19231
380003	9.99	0.7598	-0.1081		5.21221	7.60561	-2.18826
380503	10.02	0.7607	-0.108		5.22786	7.61461	-2.18623
381003	10.048	0.7618	-0.1078		5.24247	7.62563	-2.18219
381503	10.072	0.7629	-0.1076		5.25499	7.63664	-2.17814
382003	10.102	0.7638	-0.1075		5.27064	7.64565	-2.17611
382503	10.126	0.7649	-0.1073		5.28316	7.65666	-2.17206
383003	10.152	0.7658	-0.1072		5.29673	7.66567	-2.17004
383503	10.176	0.7668	-0.107		5.30925	7.67568	-2.16599
384003	10.208	0.7677	-0.1068		5.32595	7.68468	-2.16194
384503	10.23	0.7688	-0.1067		5.33743	7.6957	-2.15992
385003	10.256	0.7697	-0.1065		5.35099	7.7047	-2.15587
385503	10.282	0.7707	-0.1064		5.36456	7.71471	-2.15385
386003	10.31	0.7717	-0.1062		5.37917	7.72472	-2.1498
386503	10.338	0.7727	-0.1061		5.39377	7.73473	-2.14777
387003	10.362	0.7738	-0.1059		5.4063	7.74575	-2.14372
387503	10.388	0.7748	-0.1058		5.41986	7.75576	-2.1417
388003	10.412	0.7757	-0.1056		5.43238	7.76476	-2.13765
388503	10.438	0.7767	-0.1054		5.44595	7.77477	-2.1336
389003	10.466	0.7777	-0.1053		5.46056	7.78478	-2.13158
389503	10.49	0.7786	-0.1052		5.47308	7.79379	-2.12955
390003	10.516	0.7796	-0.105		5.48664	7.8038	-2.12551
390503	10.542	0.7805	-0.1048		5.50021	7.81281	-2.12146
391003	10.57	0.7814	-0.1047		5.51482	7.82182	-2.11943
391503	10.6	0.7825	-0.1046		5.53047	7.83283	-2.11741
392003	10.626	0.7834	-0.1044		5.54404	7.84184	-2.11336
392503	10.654	0.7845	-0.1042		5.55864	7.85285	-2.10931
393003	10.686	0.7855	-0.1041		5.57534	7.86286	-2.10729
393503	10.712	0.7865	-0.1039		5.58891	7.87287	-2.10324
394003	10.742	0.7875	-0.1038		5.60456	7.88288	-2.10121
394503	10.77	0.7885	-0.1036		5.61917	7.89289	-2.09717
395003	10.8	0.7894	-0.1034		5.63482	7.9019	-2.09312
395503	10.83	0.7903	-0.1033		5.65047	7.91091	-2.09109
396003	10.858	0.7915	-0.1031		5.66508	7.92292	-2.08704
396503	10.89	0.7925	-0.1029		5.68178	7.93293	-2.083
397003	10.926	0.7937	-0.1028		5.70056	7.94494	-2.08097
397503	10.958	0.7946	-0.1026		5.71725	7.95395	-2.07692
398003	10.986	0.7957	-0.1024		5.73186	7.96496	-2.07287
398503	11.018	0.7966	-0.1022		5.74856	7.97397	-2.06883
399003	11.044	0.7977	-0.1021		5.76212	7.98498	-2.0668
399503	11.074	0.7986	-0.1019		5.77778	7.99399	-2.06275
400003	11.1	0.7996	-0.1018		5.79134	8.004	-2.06073
400503	11.128	0.8006	-0.1016		5.80595	8.01401	-2.05668
401003	11.16	0.8017	-0.1014		5.82265	8.02503	-2.05263
401503	11.188	0.8028	-0.1013		5.83726	8.03604	-2.05061
402003	11.22	0.8036	-0.1011		5.85395	8.04404	-2.04656
402503	11.246	0.8047	-0.1009		5.86752	8.05506	-2.04251
403003	11.28	0.8055	-0.1008		5.88526	8.06306	-2.04049
403503	11.31	0.8066	-0.1006		5.90091	8.07407	-2.03644
404003	11.342	0.8076	-0.1004		5.9176	8.08408	-2.03239
404503	11.37	0.8086	-0.1002		5.93221	8.09409	-2.02834
405003	11.4	0.8096	-0.1		5.94786	8.1041	-2.02429
405503	11.432	0.8106	-0.0999		5.96456	8.11411	-2.02227
406003	11.458	0.8116	-0.0998		5.97813	8.12412	-2.02024
406503	11.488	0.8126	-0.0996		5.99378	8.13413	-2.01619
407003	11.516	0.8136	-0.0994		6.00839	8.14414	-2.01215
407503	11.542	0.8144	-0.0993		6.02195	8.15215	-2.01012
408003	11.568	0.8156	-0.0991		6.03552	8.16416	-2.00607
408503	11.594	0.8165	-0.099		6.04908	8.17317	-2.00405
409003	11.626	0.8174	-0.0987		6.06578	8.18218	-1.99798
409503	11.662	0.8184	-0.0985		6.08456	8.19219	-1.99393
410003	11.696	0.8195	-0.0984		6.1023	8.2032	-1.9919
410503	11.724	0.8205	-0.0982		6.11691	8.21321	-1.98785
411003	11.762	0.8215	-0.098		6.13674	8.22322	-1.98381
411503	11.792	0.8225	-0.0978		6.15239	8.23323	-1.97976
412003	11.824	0.8236	-0.0977		6.16908	8.24424	-1.97773
412503	11.852	0.8245	-0.0975		6.18369	8.25325	-1.97368
413003	11.884	0.8255	-0.0973		6.20039	8.26326	-1.96964
413503	11.918	0.8264	-0.0972		6.21813	8.27227	-1.96761
414003	11.944	0.8272	-0.097		6.23169	8.28028	-1.96356
414503	11.976	0.8283	-0.0968		6.24839	8.29129	-1.95951
415003	12.002	0.8293	-0.0966		6.26195	8.3013	-1.95547
415503	12.04	0.8303	-0.0965		6.28178	8.31131	-1.95344
416003	12.07	0.8313	-0.0963		6.29743	8.32132	-1.94939
416503	12.102	0.8324	-0.0962		6.31413	8.33233	-1.94737
417003	12.132	0.8333	-0.096		6.32978	8.34134	-1.94332
417503	12.166	0.8344	-0.0958		6.34752	8.35235	-1.93927
418003	12.2	0.8354	-0.0956		6.36526	8.36236	-1.93522
418503	12.234	0.8363	-0.0955		6.383	8.37137	-1.9332
419003	12.262	0.8374	-0.0953		6.39761	8.38238	-1.92915
419503	12.294	0.8384	-0.0951		6.4143	8.39239	-1.9251
420003	12.332	0.8395	-0.0949		6.43413	8.4034	-1.92105
420503	12.364	0.8406	-0.0948		6.45082	8.41441	-1.91903
421003	12.394	0.8414	-0.0946		6.46648	8.42242	-1.91498
421503	12.424	0.8425	-0.0944		6.48213	8.43343	-1.91093
422003	12.452	0.8436	-0.0943		6.49674	8.44444	-1.90891
422503	12.486	0.8445	-0.0941		6.51448	8.45345	-1.90486
423003	12.52	0.8455	-0.0939		6.53222	8.46346	-1.90081
423503	12.558	0.8467	-0.0937		6.55204	8.47548	-1.89676
424003	12.59	0.8477	-0.0935		6.56874	8.48549	-1.89271
424503	12.626	0.8487	-0.0934		6.58752	8.4955	-1.89069
425003	12.656	0.8496	-0.0932		6.60317	8.5045	-1.88664
425503	12.686	0.8507	-0.093		6.61883	8.51552	-1.88259
426003	12.722	0.8517	-0.0929		6.63761	8.52553	-1.88057
426503	12.75	0.8527	-0.0927		6.65222	8.53554	-1.87652
427003	12.782	0.8535	-0.0925		6.66891	8.54354	-1.87247
427503	12.816	0.8545	-0.0923		6.68665	8.55355	-1.86842
428003	12.846	0.8556	-0.0922		6.7023	8.56456	-1.8664
428503	12.88	0.8564	-0.092		6.72004	8.57257	-1.86235
429003	12.912	0.8574	-0.0918		6.73674	8.58258	-1.8583
429503	12.944	0.8585	-0.0916		6.75344	8.59359	-1.85425
430003	12.98	0.8595	-0.0915		6.77222	8.6036	-1.85223
430503	13.01	0.8605	-0.0913		6.78787	8.61361	-1.84818
431003	13.044	0.8614	-0.0911		6.80561	8.62262	-1.84413
431503	13.074	0.8625	-0.0909		6.82126	8.63363	-1.84008
432003	13.11	0.8635	-0.0907		6.84004	8.64364	-1.83603
432503	13.144	0.8644	-0.0905		6.85778	8.65265	-1.83198
433003	13.178	0.8654	-0.0904		6.87552	8.66266	-1.82996
433503	13.214	0.8665	-0.0902		6.89431	8.67367	-1.82591
434003	13.252	0.8674	-0.09		6.91413	8.68268	-1.82186
434503	13.282	0.8685	-0.0898		6.92978	8.69369	-1.81781
435003	13.316	0.8693	-0.0896		6.94752	8.7017	-1.81377
435503	13.352	0.8703	-0.0895		6.96631	8.71171	-1.81174
436003	13.382	0.8713	-0.0893		6.98196	8.72172	-1.80769
436503	13.418	0.8724	-0.0891		7.00074	8.73273	-1.80364
437003	13.45	0.8734	-0.089		7.01744	8.74274	-1.80162
437503	13.486	0.8743	-0.0888		7.03622	8.75175	-1.79757
438003	13.516	0.8753	-0.0886		7.05187	8.76176	-1.79352
438503	13.55	0.8764	-0.0884		7.06961	8.77277	-1.78947
439003	13.586	0.8773	-0.0882		7.08839	8.78178	-1.78543
439503	13.618	0.8784	-0.0881		7.10509	8.79279	-1.7834
440003	13.652	0.8794	-0.0879		7.12283	8.8028	-1.77935
440503	13.69	0.8802	-0.0877		7.14265	8.81081	-1.7753
441003	13.728	0.8812	-0.0875		7.16248	8.82082	-1.77126
441503	13.762	0.8822	-0.0874		7.18022	8.83083	-1.76923
442003	13.802	0.8835	-0.0871		7.20109	8.84384	-1.76316
442503	13.84	0.8843	-0.0869		7.22092	8.85185	-1.75911
443003	13.872	0.8853	-0.0868		7.23761	8.86186	-1.75709
443503	13.908	0.8863	-0.0866		7.25639	8.87187	-1.75304
444003	13.942	0.8872	-0.0864		7.27413	8.88088	-1.74899
444503	13.976	0.8882	-0.0862		7.29187	8.89089	-1.74494
445003	14.01	0.8892	-0.086		7.30961	8.9009	-1.74089
445503	14.046	0.8902	-0.0858		7.3284	8.91091	-1.73684
446003	14.08	0.8911	-0.0857		7.34613	8.91992	-1.73482
446503	14.114	0.8921	-0.0855		7.36387	8.92993	-1.73077
447003	14.158	0.8932	-0.0853		7.38683	8.94094	-1.72672
447503	14.2	0.8942	-0.0851		7.40874	8.95095	-1.72267
448003	14.236	0.8953	-0.0849		7.42753	8.96196	-1.71862
448503	14.272	0.8963	-0.0847		7.44631	8.97197	-1.71457
449003	14.318	0.8974	-0.0845		7.47031	8.98298	-1.71053
449503	14.358	0.8985	-0.0843		7.49118	8.99399	-1.70648
450003	14.396	0.8994	-0.0841		7.51101	9.003	-1.70243
450503	14.432	0.9005	-0.0839		7.52979	9.01401	-1.69838
451003	14.47	0.9015	-0.0837		7.54961	9.02402	-1.69433
451503	14.502	0.9026	-0.0835		7.56631	9.03504	-1.69028
452003	14.54	0.9035	-0.0833		7.58614	9.04404	-1.68623
452503	14.572	0.9045	-0.0831		7.60283	9.05405	-1.68219
453003	14.606	0.9054	-0.083		7.62057	9.06306	-1.68016
453503	14.64	0.9064	-0.0828		7.63831	9.07307	-1.67611
454003	14.674	0.9075	-0.0826		7.65605	9.08408	-1.67206
454503	14.708	0.9085	-0.0824		7.67379	9.09409	-1.66802
455003	14.742	0.9094	-0.0823		7.69153	9.1031	-1.66599
455503	14.78	0.9104	-0.0821		7.71135	9.11311	-1.66194
456003	14.812	0.9115	-0.0819		7.72805	9.12412	-1.65789
456503	14.848	0.9123	-0.0817		7.74683	9.13213	-1.65385
457003	14.884	0.9135	-0.0815		7.76562	9.14414	-1.6498
457503	14.92	0.9144	-0.0813		7.7844	9.15315	-1.64575
458003	14.956	0.9155	-0.0812		7.80318	9.16416	-1.64372
458503	14.992	0.9165	-0.081		7.82196	9.17417	-1.63968
459003	15.03	0.9175	-0.0809		7.84179	9.18418	-1.63765
459503	15.068	0.9184	-0.0807		7.86162	9.19319	-1.6336
460003	15.102	0.9194	-0.0805		7.87936	9.2032	-1.62955
460503	15.136	0.9204	-0.0803		7.89709	9.21321	-1.62551
461003	15.176	0.9214	-0.0801		7.91796	9.22322	-1.62146
461503	15.214	0.9224	-0.08		7.93779	9.23323	-1.61943
462003	15.246	0.9233	-0.0798		7.95449	9.24224	-1.61538
462503	15.286	0.9244	-0.0796		7.97536	9.25325	-1.61134
463003	15.318	0.9255	-0.0795		7.99205	9.26426	-1.60931
463503	15.356	0.9264	-0.0792		8.01188	9.27327	-1.60324
464003	15.388	0.9273	-0.0791		8.02857	9.28228	-1.60121
464503	15.424	0.9283	-0.0789		8.04736	9.29229	-1.59717
465003	15.46	0.9293	-0.0787		8.06614	9.3023	-1.59312
465503	15.494	0.9303	-0.0785		8.08388	9.31231	-1.58907
466003	15.534	0.9313	-0.0784		8.10475	9.32232	-1.58704
466503	15.57	0.9322	-0.0782		8.12353	9.33133	-1.583
467003	15.612	0.9332	-0.078		8.14544	9.34134	-1.57895
467503	15.65	0.9342	-0.0778		8.16527	9.35135	-1.5749
468003	15.688	0.9353	-0.0776		8.1851	9.36236	-1.57085
468503	15.726	0.9363	-0.0775		8.20492	9.37237	-1.56883
469003	15.762	0.9371	-0.0772		8.22371	9.38038	-1.56275
469503	15.802	0.9383	-0.0771		8.24458	9.39239	-1.56073
470003	15.858	0.9394	-0.0769		8.27379	9.4034	-1.55668
470503	15.912	0.9406	-0.0766		8.30197	9.41542	-1.55061
471003	15.958	0.9417	-0.0764		8.32597	9.42643	-1.54656
471503	15.996	0.9429	-0.0762		8.34579	9.43844	-1.54251
472003	16.028	0.9439	-0.076		8.36249	9.44845	-1.53846
472503	16.064	0.9449	-0.0758		8.38127	9.45846	-1.53441
473003	16.096	0.9458	-0.0757		8.39797	9.46747	-1.53239
473503	16.132	0.9468	-0.0755		8.41675	9.47748	-1.52834
474003	16.166	0.9478	-0.0753		8.43449	9.48749	-1.52429
474503	16.202	0.9488	-0.0752		8.45327	9.4975	-1.52227
475003	16.236	0.9497	-0.0751		8.47101	9.50651	-1.52024
475503	16.272	0.9506	-0.0749		8.48979	9.51552	-1.51619
476003	16.3	0.9524	-0.0751		8.5044	9.53353	-1.52024
476503	16.316	0.9528	-0.0751		8.51275	9.53754	-1.52024
477003	16.35	0.9536	-0.0751		8.53049	9.54555	-1.52024
477503	16.388	0.9546	-0.0751		8.55032	9.55556	-1.52024
478003	16.426	0.9556	-0.0751		8.57014	9.56557	-1.52024
478503	16.462	0.9566	-0.0751		8.58893	9.57558	-1.52024
479003	16.498	0.9576	-0.0751		8.60771	9.58559	-1.52024
479503	16.534	0.9586	-0.0751		8.62649	9.5956	-1.52024
480003	16.572	0.9596	-0.0751		8.64632	9.60561	-1.52024
480503	16.608	0.9607	-0.0751		8.6651	9.61662	-1.52024
481003	16.646	0.9615	-0.0751		8.68493	9.62462	-1.52024
481503	16.678	0.9626	-0.0751		8.70162	9.63564	-1.52024
482003	16.716	0.9635	-0.0751		8.72145	9.64464	-1.52024
482503	16.754	0.9646	-0.0751		8.74127	9.65566	-1.52024
483003	16.788	0.9657	-0.0751		8.75901	9.66667	-1.52024
483503	16.826	0.9664	-0.0751		8.77884	9.67367	-1.52024
484003	16.862	0.9675	-0.075		8.79762	9.68468	-1.51822
484503	16.9	0.9685	-0.075		8.81745	9.69469	-1.51822
485003	16.94	0.9694	-0.0748		8.83832	9.7037	-1.51417
485503	16.98	0.9705	-0.0747		8.85919	9.71471	-1.51215
486003	17.016	0.9714	-0.0746		8.87797	9.72372	-1.51012
486503	17.058	0.9724	-0.0745		8.89988	9.73373	-1.5081
487003	17.094	0.9734	-0.0744		8.91867	9.74374	-1.50607
487503	17.132	0.9744	-0.0742		8.93849	9.75375	-1.50202
488003	17.168	0.9755	-0.0741		8.95728	9.76476	-1.5
488503	17.206	0.9763	-0.074		8.9771	9.77277	-1.49798
489003	17.244	0.9774	-0.0739		8.99693	9.78378	-1.49595
489503	17.288	0.9783	-0.0738		9.01988	9.79279	-1.49393
490003	17.332	0.9794	-0.0736		9.04284	9.8038	-1.48988
490503	17.37	0.9804	-0.0735		9.06267	9.81381	-1.48785
491003	17.408	0.9814	-0.0733		9.08249	9.82382	-1.48381
491503	17.446	0.9823	-0.0732		9.10232	9.83283	-1.48178
492003	17.484	0.9834	-0.0731		9.12215	9.84384	-1.47976
492503	17.524	0.9842	-0.073		9.14302	9.85185	-1.47773
493003	17.566	0.9853	-0.0729		9.16493	9.86286	-1.47571
493503	17.606	0.9863	-0.0728		9.1858	9.87287	-1.47368
494003	17.646	0.9873	-0.0726		9.20667	9.88288	-1.46964
494503	17.682	0.9882	-0.0725		9.22545	9.89189	-1.46761
495003	17.722	0.9893	-0.0723		9.24632	9.9029	-1.46356
495503	17.76	0.9903	-0.0722		9.26615	9.91291	-1.46154
496003	17.802	0.9913	-0.0721		9.28806	9.92292	-1.45951
496503	17.84	0.9922	-0.0719		9.30789	9.93193	-1.45547
497003	17.876	0.9933	-0.0719		9.32667	9.94294	-1.45547
497503	17.916	0.9942	-0.0717		9.34754	9.95195	-1.45142
498003	17.952	0.9951	-0.0716		9.36632	9.96096	-1.44939
498503	17.988	0.9963	-0.0715		9.3851	9.97297	-1.44737
499003	18.024	0.9971	-0.0714		9.40389	9.98098	-1.44534
499503	18.062	0.9979	-0.0713		9.42371	9.98899	-1.44332
500003	18.102	0.9991	-0.0711		9.44458	10.001	-1.43927
500503	18.142	1	-0.071		9.46545	10.01	-1.43725
501003	18.184	1.001	-0.071		9.48737	10.02	-1.43725
501503	18.224	1.0021	-0.0708		9.50824	10.031	-1.4332
502003	18.27	1.0031	-0.0707		9.53224	10.041	-1.43117
502503	18.312	1.0041	-0.0705		9.55415	10.0511	-1.42713
503003	18.35	1.0049	-0.0704		9.57398	10.0591	-1.4251
503503	18.39	1.0062	-0.0702		9.59484	10.0721	-1.42105
504003	18.434	1.007	-0.0701		9.6178	10.0801	-1.41903
504503	18.474	1.0081	-0.07		9.63867	10.0911	-1.417
505003	18.514	1.0092	-0.0699		9.65954	10.1021	-1.41498
505503	18.55	1.0102	-0.0698		9.67832	10.1121	-1.41296
506003	18.59	1.0112	-0.0697		9.69919	10.1221	-1.41093
506503	18.622	1.0122	-0.0696		9.71589	10.1321	-1.40891
507003	18.662	1.0132	-0.0694		9.73676	10.1421	-1.40486
507503	18.7	1.0142	-0.0694		9.75658	10.1522	-1.40486
508003	18.74	1.0152	-0.0692		9.77745	10.1622	-1.40081
508503	18.78	1.016	-0.0691		9.79832	10.1702	-1.39879
509003	18.822	1.0172	-0.069		9.82024	10.1822	-1.39676
509503	18.866	1.0181	-0.0688		9.84319	10.1912	-1.39271
510003	18.906	1.019	-0.0687		9.86406	10.2002	-1.39069
510503	18.948	1.0201	-0.0686		9.88598	10.2112	-1.38866
511003	18.984	1.0211	-0.0685		9.90476	10.2212	-1.38664
511503	19.022	1.0221	-0.0684		9.92459	10.2312	-1.38462
512003	19.058	1.0231	-0.0683		9.94337	10.2412	-1.38259
512503	19.096	1.0241	-0.0682		9.96319	10.2513	-1.38057
513003	19.136	1.0252	-0.0681		9.98406	10.2623	-1.37854
513503	19.168	1.026	-0.068		10.0008	10.2703	-1.37652
514003	19.208	1.0271	-0.0678		10.0216	10.2813	-1.37247
514503	19.244	1.0279	-0.0678		10.0404	10.2893	-1.37247
515003	19.284	1.029	-0.0677		10.0613	10.3003	-1.37045
515503	19.318	1.0299	-0.0676		10.079	10.3093	-1.36842
516003	19.358	1.0309	-0.0675		10.0999	10.3193	-1.3664
516503	19.396	1.032	-0.0674		10.1197	10.3303	-1.36437
517003	19.434	1.0328	-0.0673		10.1395	10.3383	-1.36235
517503	19.478	1.034	-0.0671		10.1625	10.3504	-1.3583
518003	19.516	1.0349	-0.067		10.1823	10.3594	-1.35628
518503	19.558	1.036	-0.067		10.2042	10.3704	-1.35628
519003	19.594	1.0368	-0.0669		10.223	10.3784	-1.35425
519503	19.63	1.0378	-0.0667		10.2418	10.3884	-1.3502
520003	19.678	1.0391	-0.0667		10.2668	10.4014	-1.3502
520503	19.74	1.0402	-0.0665		10.2992	10.4124	-1.34615
521003	19.784	1.0412	-0.0664		10.3222	10.4224	-1.34413
521503	19.824	1.0425	-0.0663		10.343	10.4354	-1.34211
522003	19.86	1.0435	-0.0662		10.3618	10.4454	-1.34008
522503	19.894	1.0445	-0.0661		10.3795	10.4555	-1.33806
523003	19.922	1.0453	-0.066		10.3942	10.4635	-1.33603
523503	19.96	1.0463	-0.0659		10.414	10.4735	-1.33401
524003	19.996	1.0473	-0.0658		10.4328	10.4835	-1.33198
524503	20.034	1.0483	-0.0657		10.4526	10.4935	-1.32996
525003	20.07	1.0492	-0.0656		10.4714	10.5025	-1.32794
525503	20.11	1.0503	-0.0655		10.4922	10.5135	-1.32591
526003	20.144	1.0514	-0.0654		10.51	10.5245	-1.32389
526503	20.18	1.0522	-0.0653		10.5288	10.5325	-1.32186
527003	20.216	1.0532	-0.0652		10.5475	10.5425	-1.31984
527503	20.252	1.0541	-0.0651		10.5663	10.5516	-1.31781
528003	20.29	1.0552	-0.065		10.5862	10.5626	-1.31579
528503	20.33	1.0562	-0.0649		10.607	10.5726	-1.31377
529003	20.37	1.0572	-0.0649		10.6279	10.5826	-1.31377
529503	20.404	1.0582	-0.0647		10.6456	10.5926	-1.30972
530003	20.442	1.0592	-0.0646		10.6655	10.6026	-1.30769
530503	20.478	1.0602	-0.0645		10.6842	10.6126	-1.30567
531003	20.512	1.0611	-0.0645		10.702	10.6216	-1.30567
531503	20.554	1.0621	-0.0644		10.7239	10.6316	-1.30364
532003	20.588	1.0631	-0.0643		10.7416	10.6416	-1.30162
532503	20.626	1.0641	-0.0642		10.7615	10.6517	-1.2996
533003	20.666	1.0649	-0.0641		10.7823	10.6597	-1.29757
533503	20.708	1.0661	-0.064		10.8042	10.6717	-1.29555
534003	20.746	1.067	-0.0639		10.8241	10.6807	-1.29352
534503	20.782	1.0681	-0.0638		10.8429	10.6917	-1.2915
535003	20.824	1.0689	-0.0637		10.8648	10.6997	-1.28947
535503	20.864	1.0701	-0.0636		10.8856	10.7117	-1.28745
536003	20.904	1.0711	-0.0635		10.9065	10.7217	-1.28543
536503	20.944	1.0722	-0.0634		10.9274	10.7327	-1.2834
537003	20.982	1.0731	-0.0633		10.9472	10.7417	-1.28138
537503	21.022	1.0742	-0.0633		10.9681	10.7528	-1.28138
538003	21.06	1.0751	-0.0631		10.9879	10.7618	-1.27733
538503	21.096	1.0761	-0.063		11.0067	10.7718	-1.2753
539003	21.132	1.077	-0.0629		11.0255	10.7808	-1.27328
539503	21.168	1.0781	-0.0628		11.0442	10.7918	-1.27126
540003	21.206	1.0792	-0.0628		11.0641	10.8028	-1.27126
540503	21.242	1.08	-0.0627		11.0829	10.8108	-1.26923
541003	21.28	1.081	-0.0626		11.1027	10.8208	-1.26721
541503	21.318	1.082	-0.0624		11.1225	10.8308	-1.26316
542003	21.358	1.0829	-0.0624		11.1434	10.8398	-1.26316
542503	21.396	1.0838	-0.0623		11.1632	10.8488	-1.26113
543003	21.434	1.0849	-0.0622		11.183	10.8599	-1.25911
543503	21.468	1.0858	-0.0621		11.2008	10.8689	-1.25709
544003	21.51	1.0869	-0.062		11.2227	10.8799	-1.25506
544503	21.542	1.0879	-0.0619		11.2394	10.8899	-1.25304
545003	21.58	1.0889	-0.0618		11.2592	10.8999	-1.25101
545503	21.616	1.0898	-0.0616		11.278	10.9089	-1.24696
546003	21.656	1.0908	-0.0616		11.2989	10.9189	-1.24696
546503	21.694	1.0918	-0.0614		11.3187	10.9289	-1.24291
547003	21.73	1.0928	-0.0613		11.3375	10.9389	-1.24089
547503	21.768	1.0938	-0.0613		11.3573	10.9489	-1.24089
548003	21.806	1.0948	-0.0612		11.3771	10.959	-1.23887
548503	21.848	1.0958	-0.0611		11.399	10.969	-1.23684
549003	21.886	1.0966	-0.0609		11.4189	10.977	-1.23279
549503	21.926	1.0978	-0.0608		11.4397	10.989	-1.23077
550003	21.964	1.0987	-0.0608		11.4596	10.998	-1.23077
550503	22	1.0997	-0.0607		11.4783	11.008	-1.22874
551003	22.03	1.1007	-0.0605		11.494	11.018	-1.2247
551503	22.066	1.1017	-0.0603		11.5128	11.028	-1.22065
552003	22.098	1.1028	-0.0602		11.5295	11.039	-1.21862
552503	22.134	1.1038	-0.0601		11.5482	11.049	-1.2166
553003	22.172	1.1047	-0.0599		11.5681	11.0581	-1.21255
553503	22.21	1.1057	-0.0598		11.5879	11.0681	-1.21053
554003	22.25	1.1067	-0.0598		11.6088	11.0781	-1.21053
554503	22.286	1.1077	-0.0596		11.6276	11.0881	-1.20648
555003	22.322	1.1087	-0.0595		11.6463	11.0981	-1.20445
555503	22.358	1.1098	-0.0594		11.6651	11.1091	-1.20243
556003	22.394	1.1108	-0.0593		11.6839	11.1191	-1.2004
556503	22.43	1.1117	-0.0592		11.7027	11.1281	-1.19838
557003	22.464	1.1127	-0.0591		11.7204	11.1381	-1.19636
557503	22.498	1.1137	-0.059		11.7382	11.1481	-1.19433
558003	22.534	1.1145	-0.0589		11.7569	11.1562	-1.19231
558503	22.572	1.1155	-0.0588		11.7768	11.1662	-1.19028
559003	22.622	1.1167	-0.0587		11.8029	11.1782	-1.18826
559503	22.662	1.1177	-0.0586		11.8237	11.1882	-1.18623
560003	22.71	1.1188	-0.0584		11.8488	11.1992	-1.18219
560503	22.75	1.1199	-0.0584		11.8696	11.2102	-1.18219
561003	22.792	1.1208	-0.0583		11.8916	11.2192	-1.18016
561503	22.828	1.1219	-0.0581		11.9103	11.2302	-1.17611
562003	22.864	1.1229	-0.0581		11.9291	11.2402	-1.17611
562503	22.9	1.1239	-0.0579		11.9479	11.2503	-1.17206
563003	22.934	1.1247	-0.0579		11.9656	11.2583	-1.17206
563503	22.974	1.1257	-0.0578		11.9865	11.2683	-1.17004
564003	23.006	1.1267	-0.0577		12.0032	11.2783	-1.16802
564503	23.044	1.1279	-0.0576		12.023	11.2903	-1.16599
565003	23.078	1.1287	-0.0575		12.0408	11.2983	-1.16397
565503	23.116	1.1297	-0.0574		12.0606	11.3083	-1.16194
566003	23.152	1.1306	-0.0573		12.0794	11.3173	-1.15992
566503	23.194	1.1316	-0.0572		12.1013	11.3273	-1.15789
567003	23.23	1.1326	-0.0571		12.1201	11.3373	-1.15587
567503	23.27	1.1336	-0.057		12.1409	11.3473	-1.15385
568003	23.31	1.1344	-0.0569		12.1618	11.3554	-1.15182
568503	23.35	1.1355	-0.0568		12.1827	11.3664	-1.1498
569003	23.386	1.1366	-0.0567		12.2015	11.3774	-1.14777
569503	23.424	1.1376	-0.0567		12.2213	11.3874	-1.14777
570003	23.462	1.1385	-0.0566		12.2411	11.3964	-1.14575
570503	23.51	1.1397	-0.0565		12.2662	11.4084	-1.14372
571003	23.574	1.1409	-0.0564		12.2996	11.4204	-1.1417
571503	23.626	1.1422	-0.0562		12.3267	11.4334	-1.13765
572003	23.666	1.1432	-0.0562		12.3476	11.4434	-1.13765
572503	23.71	1.1442	-0.0561		12.3705	11.4535	-1.13563
573003	23.746	1.1452	-0.056		12.3893	11.4635	-1.1336
573503	23.78	1.1461	-0.0559		12.407	11.4725	-1.13158
574003	23.812	1.1471	-0.0557		12.4237	11.4825	-1.12753
574503	23.836	1.148	-0.0557		12.4363	11.4915	-1.12753
575003	23.86	1.1489	-0.0556		12.4488	11.5005	-1.12551
575503	23.89	1.1497	-0.0555		12.4644	11.5085	-1.12348
576003	23.926	1.1507	-0.0554		12.4832	11.5185	-1.12146
576503	23.962	1.1517	-0.0554		12.502	11.5285	-1.12146
577003	23.996	1.1528	-0.0552		12.5197	11.5395	-1.11741
577503	24.036	1.1537	-0.0551		12.5406	11.5485	-1.11538
578003	24.074	1.1548	-0.055		12.5604	11.5596	-1.11336
578503	24.11	1.1558	-0.0549		12.5792	11.5696	-1.11134
579003	24.148	1.1569	-0.0548		12.599	11.5806	-1.10931
579503	24.188	1.1577	-0.0547		12.6199	11.5886	-1.10729
580003	24.23	1.1589	-0.0546		12.6418	11.6006	-1.10526
580503	24.268	1.1597	-0.0545		12.6616	11.6086	-1.10324
581003	24.306	1.1607	-0.0545		12.6815	11.6186	-1.10324
581503	24.342	1.1618	-0.0543		12.7003	11.6296	-1.09919
582003	24.38	1.1626	-0.0543		12.7201	11.6376	-1.09919
582503	24.418	1.1636	-0.0542		12.7399	11.6476	-1.09717
583003	24.45	1.1647	-0.0541		12.7566	11.6587	-1.09514
583503	24.49	1.1656	-0.054		12.7775	11.6677	-1.09312
584003	24.534	1.1667	-0.0539		12.8004	11.6787	-1.09109
584503	24.574	1.1678	-0.0538		12.8213	11.6897	-1.08907
585003	24.61	1.1687	-0.0537		12.8401	11.6987	-1.08704
585503	24.648	1.1697	-0.0536		12.8599	11.7087	-1.08502
586003	24.688	1.1707	-0.0535		12.8808	11.7187	-1.083
586503	24.728	1.1717	-0.0534		12.9016	11.7287	-1.08097
587003	24.764	1.1726	-0.0533		12.9204	11.7377	-1.07895
587503	24.8	1.1738	-0.0532		12.9392	11.7497	-1.07692
588003	24.832	1.1747	-0.0531		12.9559	11.7588	-1.0749
588503	24.872	1.1755	-0.053		12.9768	11.7668	-1.07287
589003	24.904	1.1767	-0.0529		12.9935	11.7788	-1.07085
589503	24.94	1.1777	-0.0528		13.0123	11.7888	-1.06883
590003	24.978	1.1787	-0.0528		13.0321	11.7988	-1.06883
590503	25.012	1.1796	-0.0526		13.0498	11.8078	-1.06478
591003	25.052	1.1805	-0.0526		13.0707	11.8168	-1.06478
591503	25.088	1.1816	-0.0525		13.0895	11.8278	-1.06275
592003	25.128	1.1826	-0.0524		13.1103	11.8378	-1.06073
592503	25.168	1.1836	-0.0523		13.1312	11.8478	-1.0587
593003	25.208	1.1844	-0.0522		13.1521	11.8559	-1.05668
593503	25.246	1.1855	-0.0521		13.1719	11.8669	-1.05466
594003	25.282	1.1864	-0.052		13.1907	11.8759	-1.05263
594503	25.318	1.1875	-0.0519		13.2095	11.8869	-1.05061
595003	25.356	1.1885	-0.0518		13.2293	11.8969	-1.04858
595503	25.39	1.1894	-0.0517		13.247	11.9059	-1.04656
596003	25.442	1.1906	-0.0517		13.2742	11.9179	-1.04656
596503	25.488	1.1917	-0.0516		13.2982	11.9289	-1.04453
597003	25.528	1.1928	-0.0515		13.319	11.9399	-1.04251
597503	25.562	1.1939	-0.0514		13.3368	11.951	-1.04049
598003	25.596	1.1948	-0.0513		13.3545	11.96	-1.03846
598503	25.63	1.1957	-0.0512		13.3723	11.969	-1.03644
599003	25.67	1.1967	-0.0511		13.3931	11.979	-1.03441
599503	25.706	1.1976	-0.051		13.4119	11.988	-1.03239
600003	25.744	1.1987	-0.0509		13.4317	11.999	-1.03036
600503	25.78	1.1997	-0.0508		13.4505	12.009	-1.02834
601003	25.818	1.2006	-0.0508		13.4703	12.018	-1.02834
601503	25.852	1.2015	-0.0507		13.4881	12.027	-1.02632
602003	25.892	1.2027	-0.0506		13.509	12.039	-1.02429
602503	25.928	1.2036	-0.0505		13.5277	12.048	-1.02227
603003	25.96	1.2047	-0.0504		13.5444	12.0591	-1.02024
603503	26	1.2055	-0.0503		13.5653	12.0671	-1.01822
604003	26.036	1.2065	-0.0502		13.5841	12.0771	-1.01619
604503	26.074	1.2076	-0.0502		13.6039	12.0881	-1.01619
605003	26.108	1.2085	-0.0501		13.6217	12.0971	-1.01417
605503	26.148	1.2095	-0.05		13.6425	12.1071	-1.01215
606003	26.182	1.2107	-0.0499		13.6603	12.1191	-1.01012
606503	26.222	1.2116	-0.0498		13.6811	12.1281	-1.0081
607003	26.258	1.2124	-0.0497		13.6999	12.1361	-1.00607
607503	26.294	1.2133	-0.0496		13.7187	12.1451	-1.00405
608003	26.338	1.2144	-0.0495		13.7417	12.1562	-1.00202
608503	26.374	1.2154	-0.0494		13.7604	12.1662	-1
609003	26.408	1.2163	-0.0493		13.7782	12.1752	-0.997976
609503	26.442	1.2174	-0.0492		13.7959	12.1862	-0.995951
610003	26.478	1.2183	-0.0492		13.8147	12.1952	-0.995951
610503	26.514	1.2193	-0.0491		13.8335	12.2052	-0.993927
611003	26.554	1.2202	-0.049		13.8544	12.2142	-0.991903
611503	26.598	1.2214	-0.0489		13.8773	12.2262	-0.989879
612003	26.636	1.2224	-0.0488		13.8971	12.2362	-0.987854
612503	26.674	1.2234	-0.0487		13.917	12.2462	-0.98583
613003	26.712	1.2244	-0.0486		13.9368	12.2563	-0.983806
613503	26.752	1.2254	-0.0485		13.9577	12.2663	-0.981781
614003	26.786	1.2264	-0.0484		13.9754	12.2763	-0.979757
614503	26.82	1.2275	-0.0483		13.9931	12.2873	-0.977733
615003	26.856	1.2284	-0.0483		14.0119	12.2963	-0.977733
615503	26.894	1.2292	-0.0481		14.0317	12.3043	-0.973684
616003	26.932	1.2303	-0.0481		14.0516	12.3153	-0.973684
616503	26.972	1.2313	-0.0479		14.0724	12.3253	-0.969636
617003	27.006	1.2323	-0.0479		14.0902	12.3353	-0.969636
617503	27.04	1.2333	-0.0478		14.1079	12.3453	-0.967611
618003	27.076	1.2345	-0.0477		14.1267	12.3574	-0.965587
618503	27.108	1.2352	-0.0476		14.1434	12.3644	-0.963563
619003	27.142	1.2363	-0.0475		14.1611	12.3754	-0.961538
619503	27.18	1.2372	-0.0474		14.181	12.3844	-0.959514
620003	27.214	1.2381	-0.0474		14.1987	12.3934	-0.959514
620503	27.252	1.2392	-0.0472		14.2185	12.4044	-0.955466
621003	27.296	1.2402	-0.0471		14.2415	12.4144	-0.953441
621503	27.342	1.2414	-0.0471		14.2655	12.4264	-0.953441
622003	27.382	1.2425	-0.047		14.2864	12.4374	-0.951417
622503	27.414	1.2436	-0.0468		14.303	12.4484	-0.947368
623003	27.45	1.2445	-0.0467		14.3218	12.4575	-0.945344
623503	27.484	1.2454	-0.0467		14.3396	12.4665	-0.945344
624003	27.518	1.2463	-0.0466		14.3573	12.4755	-0.94332
624503	27.556	1.2474	-0.0465		14.3771	12.4865	-0.941296
625003	27.594	1.2484	-0.0464		14.397	12.4965	-0.939271
625503	27.634	1.2494	-0.0463		14.4178	12.5065	-0.937247
626003	27.684	1.2506	-0.0462		14.4439	12.5185	-0.935223
626503	27.722	1.2515	-0.0461		14.4637	12.5275	-0.933198
627003	27.76	1.2526	-0.046		14.4836	12.5385	-0.931174
627503	27.796	1.2538	-0.0459		14.5024	12.5506	-0.92915
628003	27.83	1.2547	-0.0459		14.5201	12.5596	-0.92915
628503	27.86	1.2556	-0.0458		14.5357	12.5686	-0.927126
629003	27.896	1.2566	-0.0457		14.5545	12.5786	-0.925101
629503	27.928	1.2576	-0.0456		14.5712	12.5886	-0.923077
630003	27.962	1.2586	-0.0455		14.589	12.5986	-0.921053
630503	27.996	1.2595	-0.0454		14.6067	12.6076	-0.919028
631003	28.03	1.2605	-0.0453		14.6244	12.6176	-0.917004
631503	28.064	1.2617	-0.0453		14.6422	12.6296	-0.917004
632003	28.1	1.2625	-0.0452		14.661	12.6376	-0.91498
632503	28.138	1.2633	-0.0451		14.6808	12.6456	-0.912955
633003	28.174	1.2644	-0.045		14.6996	12.6567	-0.910931
633503	28.214	1.2653	-0.0449		14.7204	12.6657	-0.908907
634003	28.248	1.2666	-0.0448		14.7382	12.6787	-0.906883
634503	28.284	1.2674	-0.0448		14.757	12.6867	-0.906883
635003	28.318	1.2684	-0.0446		14.7747	12.6967	-0.902834
635503	28.348	1.2694	-0.0446		14.7904	12.7067	-0.902834
636003	28.382	1.2704	-0.0445		14.8081	12.7167	-0.90081
636503	28.418	1.2713	-0.0444		14.8269	12.7257	-0.898785
637003	28.454	1.2724	-0.0443		14.8457	12.7367	-0.896761
637503	28.488	1.2732	-0.0442		14.8634	12.7447	-0.894737
638003	28.524	1.2744	-0.0441		14.8822	12.7568	-0.892713
638503	28.56	1.2753	-0.044		14.901	12.7658	-0.890688
639003	28.596	1.2762	-0.044		14.9197	12.7748	-0.890688
639503	28.634	1.2772	-0.0439		14.9396	12.7848	-0.888664
640003	28.666	1.2782	-0.0438		14.9563	12.7948	-0.88664
640503	28.706	1.2792	-0.0437		14.9771	12.8048	-0.884615
641003	28.736	1.2802	-0.0436		14.9928	12.8148	-0.882591
641503	28.77	1.2811	-0.0435		15.0105	12.8238	-0.880567
642003	28.808	1.2821	-0.0434		15.0304	12.8338	-0.878543
642503	28.842	1.2831	-0.0434		15.0481	12.8438	-0.878543
643003	28.88	1.2841	-0.0433		15.0679	12.8539	-0.876518
643503	28.912	1.2852	-0.0432		15.0846	12.8649	-0.874494
644003	28.946	1.286	-0.0431		15.1024	12.8729	-0.87247
644503	28.978	1.287	-0.043		15.1191	12.8829	-0.870445
645003	29.016	1.288	-0.043		15.1389	12.8929	-0.870445
645503	29.054	1.2891	-0.0429		15.1587	12.9039	-0.868421
646003	29.096	1.2901	-0.0428		15.1806	12.9139	-0.866397
646503	29.136	1.2912	-0.0428		15.2015	12.9249	-0.866397
647003	29.172	1.2923	-0.0426		15.2203	12.9359	-0.862348
647503	29.208	1.2932	-0.0426		15.2391	12.9449	-0.862348
648003	29.242	1.2941	-0.0425		15.2568	12.954	-0.860324
648503	29.28	1.2953	-0.0424		15.2766	12.966	-0.8583
649003	29.31	1.2961	-0.0423		15.2923	12.974	-0.856275
649503	29.35	1.2973	-0.0422		15.3131	12.986	-0.854251
650003	29.388	1.2982	-0.0422		15.333	12.995	-0.854251
650503	29.426	1.2992	-0.042		15.3528	13.005	-0.850202
651003	29.462	1.3002	-0.0419		15.3716	13.015	-0.848178
651503	29.5	1.3011	-0.0418		15.3914	13.024	-0.846154
652003	29.532	1.3022	-0.0418		15.4081	13.035	-0.846154
652503	29.568	1.3032	-0.0417		15.4269	13.045	-0.84413
653003	29.602	1.3042	-0.0416		15.4446	13.0551	-0.842105
653503	29.638	1.3052	-0.0416		15.4634	13.0651	-0.842105
654003	29.666	1.3063	-0.0415		15.478	13.0761	-0.840081
654503	29.706	1.3071	-0.0414		15.4989	13.0841	-0.838057
655003	29.74	1.3081	-0.0413		15.5166	13.0941	-0.836032
655503	29.772	1.309	-0.0413		15.5333	13.1031	-0.836032
656003	29.808	1.31	-0.0412		15.5521	13.1131	-0.834008
656503	29.836	1.3111	-0.0411		15.5667	13.1241	-0.831984
657003	29.868	1.312	-0.0411		15.5834	13.1331	-0.831984
657503	29.904	1.3131	-0.0409		15.6022	13.1441	-0.827935
658003	29.936	1.314	-0.0409		15.6189	13.1532	-0.827935
658503	29.97	1.3151	-0.0408		15.6366	13.1642	-0.825911
659003	30.012	1.316	-0.0407		15.6585	13.1732	-0.823887
659503	30.048	1.317	-0.0406		15.6773	13.1832	-0.821862
660003	30.086	1.318	-0.0405		15.6971	13.1932	-0.819838
660503	30.12	1.319	-0.0404		15.7149	13.2032	-0.817814
661003	30.154	1.3199	-0.0403		15.7326	13.2122	-0.815789
661503	30.184	1.321	-0.0403		15.7483	13.2232	-0.815789
662003	30.22	1.3219	-0.0402		15.7671	13.2322	-0.813765
662503	30.256	1.323	-0.0402		15.7858	13.2432	-0.813765
663003	30.29	1.3239	-0.04		15.8036	13.2523	-0.809717
663503	30.326	1.3249	-0.04		15.8224	13.2623	-0.809717
664003	30.384	1.3262	-0.0398		15.8526	13.2753	-0.805668
664503	30.43	1.3274	-0.0397		15.8766	13.2873	-0.803644
665003	30.468	1.3284	-0.0395		15.8965	13.2973	-0.799595
665503	30.502	1.3294	-0.0395		15.9142	13.3073	-0.799595
666003	30.538	1.3304	-0.0394		15.933	13.3173	-0.797571
666503	30.564	1.3313	-0.0393		15.9465	13.3263	-0.795547
667003	30.596	1.3323	-0.0392		15.9632	13.3363	-0.793522
667503	30.626	1.3333	-0.0392		15.9789	13.3463	-0.793522
668003	30.662	1.3343	-0.0391		15.9977	13.3564	-0.791498
668503	30.694	1.3353	-0.039		16.0144	13.3664	-0.789474
669003	30.73	1.3363	-0.0388		16.0331	13.3764	-0.785425
669503	30.76	1.3373	-0.0388		16.0488	13.3864	-0.785425
670003	30.794	1.3382	-0.0387		16.0665	13.3954	-0.783401
670503	30.828	1.3392	-0.0386		16.0843	13.4054	-0.781377
671003	30.856	1.3402	-0.0385		16.0989	13.4154	-0.779352
671503	30.888	1.3413	-0.0384		16.1156	13.4264	-0.777328
672003	30.92	1.3423	-0.0384		16.1323	13.4364	-0.777328
672503	30.952	1.3432	-0.0383		16.149	13.4454	-0.775304
673003	30.988	1.3443	-0.0382		16.1678	13.4565	-0.773279
673503	31.016	1.3451	-0.0382		16.1824	13.4645	-0.773279
674003	31.052	1.3462	-0.038		16.2011	13.4755	-0.769231
674503	31.084	1.3471	-0.038		16.2178	13.4845	-0.769231
675003	31.116	1.3481	-0.0379		16.2345	13.4945	-0.767206
675503	31.148	1.3491	-0.0378		16.2512	13.5045	-0.765182
676003	31.182	1.35	-0.0377		16.269	13.5135	-0.763158
676503	31.218	1.3511	-0.0377		16.2878	13.5245	-0.763158
677003	31.252	1.352	-0.0375		16.3055	13.5335	-0.759109
677503	31.29	1.3532	-0.0374		16.3253	13.5455	-0.757085
678003	31.324	1.3539	-0.0374		16.3431	13.5526	-0.757085
678503	31.356	1.355	-0.0372		16.3598	13.5636	-0.753036
679003	31.392	1.3561	-0.0372		16.3785	13.5746	-0.753036
679503	31.424	1.357	-0.0371		16.3952	13.5836	-0.751012
680003	31.452	1.3579	-0.037		16.4098	13.5926	-0.748988
680503	31.484	1.359	-0.0369		16.4265	13.6036	-0.746964
681003	31.518	1.3599	-0.0368		16.4443	13.6126	-0.744939
681503	31.554	1.361	-0.0367		16.4631	13.6236	-0.742915
682003	31.592	1.362	-0.0366		16.4829	13.6336	-0.740891
682503	31.624	1.363	-0.0365		16.4996	13.6436	-0.738866
683003	31.666	1.3641	-0.0364		16.5215	13.6547	-0.736842
683503	31.706	1.3651	-0.0363		16.5424	13.6647	-0.734818
684003	31.74	1.3662	-0.0362		16.5601	13.6757	-0.732794
684503	31.772	1.3672	-0.0361		16.5768	13.6857	-0.730769
685003	31.806	1.3681	-0.0361		16.5945	13.6947	-0.730769
685503	31.832	1.3691	-0.036		16.6081	13.7047	-0.728745
686003	31.868	1.3701	-0.0359		16.6269	13.7147	-0.726721
686503	31.902	1.371	-0.0358		16.6446	13.7237	-0.724696
687003	31.936	1.3719	-0.0357		16.6624	13.7327	-0.722672
687503	31.976	1.3731	-0.0356		16.6832	13.7447	-0.720648
688003	32.008	1.3741	-0.0354		16.6999	13.7548	-0.716599
688503	32.044	1.3751	-0.0354		16.7187	13.7648	-0.716599
689003	32.084	1.3761	-0.0353		16.7396	13.7748	-0.714575
689503	32.116	1.377	-0.0352		16.7563	13.7838	-0.712551
690003	32.144	1.3781	-0.0352		16.7709	13.7948	-0.712551
690503	32.176	1.3791	-0.035		16.7876	13.8048	-0.708502
691003	32.214	1.3801	-0.035		16.8074	13.8148	-0.708502
691503	32.25	1.3813	-0.0348		16.8262	13.8268	-0.704453
692003	32.28	1.3821	-0.0347		16.8418	13.8348	-0.702429
692503	32.31	1.3831	-0.0347		16.8575	13.8448	-0.702429
693003	32.348	1.3841	-0.0346		16.8773	13.8549	-0.700405
693503	32.374	1.3852	-0.0345		16.8909	13.8659	-0.698381
694003	32.408	1.3861	-0.0344		16.9086	13.8749	-0.696356
694503	32.44	1.387	-0.0343		16.9253	13.8839	-0.694332
695003	32.47	1.3882	-0.0342		16.941	13.8959	-0.692308
695503	32.504	1.3889	-0.0341		16.9587	13.9029	-0.690283
696003	32.54	1.39	-0.034		16.9775	13.9139	-0.688259
696503	32.572	1.3911	-0.034		16.9942	13.9249	-0.688259
697003	32.602	1.392	-0.0339		17.0098	13.9339	-0.686235
697503	32.636	1.393	-0.0338		17.0276	13.9439	-0.684211
698003	32.67	1.394	-0.0337		17.0453	13.954	-0.682186
698503	32.702	1.395	-0.0336		17.062	13.964	-0.680162
699003	32.732	1.3959	-0.0335		17.0777	13.973	-0.678138
699503	32.768	1.3969	-0.0335		17.0965	13.983	-0.678138
700003	32.804	1.398	-0.0334		17.1152	13.994	-0.676113
700503	32.838	1.3991	-0.0333		17.133	14.005	-0.674089
701003	32.872	1.4	-0.0332		17.1507	14.014	-0.672065
701503	32.912	1.4011	-0.0331		17.1716	14.025	-0.67004
702003	32.95	1.4022	-0.033		17.1914	14.036	-0.668016
702503	32.988	1.4031	-0.0329		17.2112	14.045	-0.665992
703003	33.022	1.4043	-0.0328		17.229	14.0571	-0.663968
703503	33.05	1.4053	-0.0327		17.2436	14.0671	-0.661943
704003	33.08	1.4061	-0.0326		17.2592	14.0751	-0.659919
704503	33.114	1.407	-0.0325		17.277	14.0841	-0.657895
705003	33.146	1.4081	-0.0325		17.2937	14.0951	-0.657895
705503	33.182	1.409	-0.0324		17.3125	14.1041	-0.65587
706003	33.214	1.4102	-0.0323		17.3292	14.1161	-0.653846
706503	33.25	1.4111	-0.0322		17.3479	14.1251	-0.651822
707003	33.282	1.412	-0.0321		17.3646	14.1341	-0.649798
707503	33.306	1.413	-0.032		17.3772	14.1441	-0.647773
708003	33.34	1.4141	-0.032		17.3949	14.1552	-0.647773
708503	33.368	1.415	-0.0319		17.4095	14.1642	-0.645749
709003	33.402	1.416	-0.0318		17.4272	14.1742	-0.643725
709503	33.436	1.4171	-0.0318		17.445	14.1852	-0.643725
710003	33.468	1.418	-0.0317		17.4617	14.1942	-0.6417
710503	33.5	1.4191	-0.0316		17.4784	14.2052	-0.639676
711003	33.534	1.42	-0.0316		17.4961	14.2142	-0.639676
711503	33.564	1.421	-0.0314		17.5118	14.2242	-0.635628
712003	33.596	1.422	-0.0313		17.5285	14.2342	-0.633603
712503	33.666	1.4234	-0.0313		17.565	14.2482	-0.633603
713003	33.716	1.4246	-0.0312		17.5911	14.2603	-0.631579
713503	33.75	1.4255	-0.0311		17.6088	14.2693	-0.629555
714003	33.786	1.4265	-0.031		17.6276	14.2793	-0.62753
714503	33.816	1.4275	-0.0309		17.6432	14.2893	-0.625506
715003	33.844	1.4286	-0.0309		17.6579	14.3003	-0.625506
715503	33.874	1.4297	-0.0308		17.6735	14.3113	-0.623482
716003	33.902	1.4305	-0.0307		17.6881	14.3193	-0.621457
716503	33.93	1.4315	-0.0306		17.7027	14.3293	-0.619433
717003	33.96	1.4325	-0.0306		17.7184	14.3393	-0.619433
717503	33.99	1.4335	-0.0304		17.734	14.3493	-0.615385
718003	34.016	1.4345	-0.0304		17.7476	14.3594	-0.615385
718503	34.046	1.4355	-0.0303		17.7632	14.3694	-0.61336
719003	34.076	1.4363	-0.0302		17.7789	14.3774	-0.611336
719503	34.102	1.4373	-0.0302		17.7925	14.3874	-0.611336
720003	34.136	1.4382	-0.0301		17.8102	14.3964	-0.609312
720503	34.164	1.4393	-0.03		17.8248	14.4074	-0.607287
721003	34.196	1.4404	-0.0299		17.8415	14.4184	-0.605263
721503	34.232	1.4413	-0.0298		17.8603	14.4274	-0.603239
722003	34.26	1.4424	-0.0297		17.8749	14.4384	-0.601215
722503	34.29	1.4434	-0.0297		17.8906	14.4484	-0.601215
723003	34.318	1.4443	-0.0296		17.9052	14.4575	-0.59919
723503	34.346	1.4454	-0.0295		17.9198	14.4685	-0.597166
724003	34.376	1.4462	-0.0295		17.9354	14.4765	-0.597166
724503	34.406	1.4471	-0.0294		17.9511	14.4855	-0.595142
725003	34.444	1.4481	-0.0293		17.9709	14.4955	-0.593117
725503	34.474	1.4491	-0.0292		17.9866	14.5055	-0.591093
726003	34.504	1.4502	-0.0292		18.0022	14.5165	-0.591093
726503	34.536	1.4512	-0.0291		18.0189	14.5265	-0.589069
727003	34.568	1.4522	-0.029		18.0356	14.5365	-0.587045
727503	34.6	1.4531	-0.0289		18.0523	14.5455	-0.58502
728003	34.63	1.4541	-0.0288		18.0679	14.5556	-0.582996
728503	34.664	1.4551	-0.0287		18.0857	14.5656	-0.580972
729003	34.696	1.456	-0.0287		18.1024	14.5746	-0.580972
729503	34.726	1.4571	-0.0286		18.118	14.5856	-0.578947
730003	34.758	1.458	-0.0285		18.1347	14.5946	-0.576923
730503	34.782	1.4591	-0.0285		18.1472	14.6056	-0.576923
731003	34.812	1.4601	-0.0284		18.1629	14.6156	-0.574899
731503	34.836	1.461	-0.0283		18.1754	14.6246	-0.572874
732003	34.87	1.462	-0.0282		18.1932	14.6346	-0.57085
732503	34.906	1.4631	-0.0282		18.2119	14.6456	-0.57085
733003	34.936	1.4641	-0.0281		18.2276	14.6557	-0.568826
733503	34.974	1.465	-0.028		18.2474	14.6647	-0.566802
734003	35.004	1.466	-0.0279		18.2631	14.6747	-0.564777
734503	35.04	1.4669	-0.0278		18.2819	14.6837	-0.562753
735003	35.072	1.468	-0.0277		18.2986	14.6947	-0.560729
735503	35.116	1.469	-0.0276		18.3215	14.7047	-0.558704
736003	35.156	1.4702	-0.0276		18.3424	14.7167	-0.558704
736503	35.19	1.4712	-0.0275		18.3601	14.7267	-0.55668
737003	35.222	1.4722	-0.0273		18.3768	14.7367	-0.552632
737503	35.252	1.4732	-0.0273		18.3925	14.7467	-0.552632
738003	35.282	1.4741	-0.0272		18.4081	14.7558	-0.550607
738503	35.31	1.4751	-0.0271		18.4227	14.7658	-0.548583
739003	35.334	1.4762	-0.027		18.4352	14.7768	-0.546559
739503	35.364	1.4771	-0.027		18.4509	14.7858	-0.546559
740003	35.392	1.4781	-0.0269		18.4655	14.7958	-0.544534
740503	35.418	1.479	-0.0268		18.4791	14.8048	-0.54251
741003	35.448	1.48	-0.0267		18.4947	14.8148	-0.540486
741503	35.478	1.4809	-0.0267		18.5104	14.8238	-0.540486
742003	35.51	1.482	-0.0266		18.5271	14.8348	-0.538462
742503	35.536	1.4829	-0.0265		18.5406	14.8438	-0.536437
743003	35.57	1.4839	-0.0264		18.5584	14.8539	-0.534413
743503	35.598	1.4849	-0.0263		18.573	14.8639	-0.532389
744003	35.624	1.4863	-0.0262		18.5866	14.8779	-0.530364
744503	35.61	1.4879	-0.0262		18.5793	14.8939	-0.530364
745003	35.606	1.4884	-0.0262		18.5772	14.8989	-0.530364
745503	35.626	1.4888	-0.0262		18.5876	14.9029	-0.530364
746003	35.688	1.4895	-0.0262		18.6199	14.9099	-0.530364
746503	35.778	1.4907	-0.0261		18.6669	14.9219	-0.52834
747003	35.862	1.4921	-0.026		18.7107	14.9359	-0.526316
747503	35.922	1.4935	-0.0258		18.742	14.9499	-0.522267
748003	35.954	1.4945	-0.0257		18.7587	14.96	-0.520243
748503	35.986	1.4956	-0.0256		18.7754	14.971	-0.518219
749003	36.016	1.4967	-0.0255		18.7911	14.982	-0.516194
749503	36.036	1.4977	-0.0255		18.8015	14.992	-0.516194
750003	36.064	1.4986	-0.0254		18.8161	15.001	-0.51417
750503	36.086	1.4996	-0.0253		18.8276	15.011	-0.512146
751003	36.114	1.5006	-0.0252		18.8422	15.021	-0.510121
751503	36.142	1.5015	-0.0252		18.8568	15.03	-0.510121
752003	36.17	1.5025	-0.025		18.8714	15.04	-0.506073
752503	36.204	1.5035	-0.0249		18.8892	15.0501	-0.504049
753003	36.232	1.5045	-0.0248		18.9038	15.0601	-0.502024
753503	36.264	1.5056	-0.0247		18.9205	15.0711	-0.5
754003	36.288	1.5064	-0.0247		18.933	15.0791	-0.5
754503	36.316	1.5075	-0.0246		18.9476	15.0901	-0.497976
755003	36.344	1.5083	-0.0245		18.9622	15.0981	-0.495951
755503	36.37	1.5094	-0.0244		18.9758	15.1091	-0.493927
756003	36.396	1.5103	-0.0244		18.9893	15.1181	-0.493927
756503	36.426	1.5114	-0.0244		19.005	15.1291	-0.493927
757003	36.45	1.5124	-0.0242		19.0175	15.1391	-0.489879
757503	36.474	1.5133	-0.0241		19.03	15.1481	-0.487854
758003	36.5	1.5142	-0.024		19.0436	15.1572	-0.48583
758503	36.528	1.5153	-0.0239		19.0582	15.1682	-0.483806
759003	36.554	1.5163	-0.0238		19.0718	15.1782	-0.481781
759503	36.584	1.5172	-0.0238		19.0874	15.1872	-0.481781
760003	36.614	1.5183	-0.0237		19.1031	15.1982	-0.479757
760503	36.644	1.5193	-0.0236		19.1187	15.2082	-0.477733
761003	36.67	1.5201	-0.0235		19.1323	15.2162	-0.475709
761503	36.702	1.5211	-0.0234		19.149	15.2262	-0.473684
762003	36.734	1.5221	-0.0233		19.1657	15.2362	-0.47166
762503	36.766	1.5231	-0.0232		19.1824	15.2462	-0.469636
763003	36.796	1.5242	-0.0232		19.198	15.2573	-0.469636
763503	36.822	1.5251	-0.023		19.2116	15.2663	-0.465587
764003	36.854	1.5262	-0.023		19.2283	15.2773	-0.465587
764503	36.884	1.527	-0.0229		19.244	15.2853	-0.463563
765003	36.914	1.5281	-0.0228		19.2596	15.2963	-0.461538
765503	36.948	1.5291	-0.0227		19.2773	15.3063	-0.459514
766003	36.966	1.5299	-0.0226		19.2867	15.3143	-0.45749
766503	36.98	1.5307	-0.0226		19.294	15.3223	-0.45749
767003	37	1.5318	-0.0225		19.3045	15.3333	-0.455466
767503	37.03	1.5326	-0.0224		19.3201	15.3413	-0.453441
768003	37.06	1.5336	-0.0223		19.3358	15.3514	-0.451417
768503	37.086	1.5346	-0.0222		19.3493	15.3614	-0.449393
769003	37.116	1.5356	-0.0221		19.365	15.3714	-0.447368
769503	37.146	1.5365	-0.0219		19.3806	15.3804	-0.44332
770003	37.26	1.5371	-0.0175		19.4401	15.3864	-0.354251
770503	37.152	1.5386	-0.0175		19.3838	15.4014	-0.354251
771003	37.504	1.5414	-0.0175		19.5674	15.4294	-0.354251
771503	37.246	1.5407	-0.0174		19.4328	15.4224	-0.352227
772003	37.544	1.5431	-0.0174		19.5883	15.4464	-0.352227
772503	37.55	1.544	-0.0174		19.5914	15.4555	-0.352227
773003	37.506	1.5445	-0.0174		19.5685	15.4605	-0.352227
773503	37.48	1.545	-0.0174		19.5549	15.4655	-0.352227
774003	37.502	1.5458	-0.0174		19.5664	15.4735	-0.352227
774503	37.562	1.547	-0.0174		19.5977	15.4855	-0.352227
775003	37.614	1.5485	-0.0174		19.6248	15.5005	-0.352227
775503	37.64	1.5494	-0.0174		19.6384	15.5095	-0.352227
776003	37.66	1.5504	-0.0173		19.6488	15.5195	-0.350202
776503	37.672	1.5512	-0.0174		19.6551	15.5275	-0.352227
777003	37.69	1.5522	-0.0173		19.6645	15.5375	-0.350202
777503	37.718	1.5531	-0.0172		19.6791	15.5465	-0.348178
778003	37.746	1.5542	-0.0172		19.6937	15.5576	-0.348178
778503	37.776	1.5552	-0.0171		19.7093	15.5676	-0.346154
779003	37.816	1.5563	-0.0171		19.7302	15.5786	-0.346154
779503	37.852	1.5575	-0.0172		19.749	15.5906	-0.348178
780003	37.876	1.5587	-0.0171		19.7615	15.6026	-0.346154
780503	37.892	1.5595	-0.0171		19.7699	15.6106	-0.346154
781003	37.912	1.5605	-0.017		19.7803	15.6206	-0.34413
781503	37.932	1.5614	-0.0169		19.7907	15.6296	-0.342105
782003	37.956	1.5623	-0.0168		19.8033	15.6386	-0.340081
782503	37.978	1.5633	-0.0167		19.8147	15.6486	-0.338057
783003	38.004	1.5643	-0.0167		19.8283	15.6587	-0.338057
783503	38.028	1.5653	-0.0167		19.8408	15.6687	-0.338057
784003	38.05	1.5662	-0.0165		19.8523	15.6777	-0.334008
784503	38.082	1.5671	-0.0165		19.869	15.6867	-0.334008
785003	38.108	1.5682	-0.0164		19.8826	15.6977	-0.331984
785503	38.138	1.5691	-0.0164		19.8982	15.7067	-0.331984
786003	38.168	1.57	-0.0163		19.9139	15.7157	-0.32996
786503	38.202	1.5712	-0.0162		19.9316	15.7277	-0.327935
787003	38.236	1.5721	-0.0161		19.9493	15.7367	-0.325911
787503	38.264	1.5732	-0.016		19.964	15.7477	-0.323887
788003	38.288	1.5742	-0.016		19.9765	15.7578	-0.323887
788503	38.32	1.5752	-0.0159		19.9932	15.7678	-0.321862
789003	38.326	1.5761	-0.0158		19.9963	15.7768	-0.319838
789503	38.352	1.577	-0.0157		20.0099	15.7858	-0.317814
790003	38.382	1.5781	-0.0157		20.0255	15.7968	-0.317814
790503	38.408	1.579	-0.0156		20.0391	15.8058	-0.315789
791003	38.436	1.5801	-0.0155		20.0537	15.8168	-0.313765
791503	38.458	1.581	-0.0154		20.0652	15.8258	-0.311741
792003	38.492	1.5821	-0.0153		20.0829	15.8368	-0.309717
792503	38.528	1.583	-0.0152		20.1017	15.8458	-0.307692
793003	38.56	1.5842	-0.0152		20.1184	15.8579	-0.307692
793503	38.586	1.5851	-0.015		20.132	15.8669	-0.303644
794003	38.606	1.586	-0.0149		20.1424	15.8759	-0.301619
794503	38.626	1.587	-0.0148		20.1528	15.8859	-0.299595
795003	38.65	1.5879	-0.0147		20.1653	15.8949	-0.297571
795503	38.674	1.589	-0.0146		20.1779	15.9059	-0.295547
796003	38.704	1.5899	-0.0146		20.1935	15.9149	-0.295547
796503	38.732	1.591	-0.0145		20.2081	15.9259	-0.293522
797003	38.762	1.5918	-0.0143		20.2238	15.9339	-0.289474
797503	38.796	1.5929	-0.0143		20.2415	15.9449	-0.289474
798003	38.826	1.594	-0.0142		20.2572	15.956	-0.287449
798503	38.854	1.595	-0.0141		20.2718	15.966	-0.285425
799003	38.88	1.5959	-0.014		20.2853	15.975	-0.283401
799503	38.904	1.5969	-0.0139		20.2979	15.985	-0.281377
800003	38.928	1.598	-0.0139		20.3104	15.996	-0.281377
800503	38.954	1.5989	-0.0138		20.324	16.005	-0.279352
801003	38.98	1.5999	-0.0137		20.3375	16.015	-0.277328
801503	39.004	1.6008	-0.0136		20.35	16.024	-0.275304
802003	39.032	1.602	-0.0135		20.3647	16.036	-0.273279
802503	39.058	1.603	-0.0134		20.3782	16.046	-0.271255
803003	39.1	1.6039	-0.0133		20.4001	16.0551	-0.269231
803503	39.144	1.6052	-0.0132		20.4231	16.0681	-0.267206
804003	39.17	1.6061	-0.0131		20.4367	16.0771	-0.265182
804503	39.192	1.6072	-0.013		20.4481	16.0881	-0.263158
805003	39.216	1.608	-0.0129		20.4607	16.0961	-0.261134
805503	39.244	1.6092	-0.0129		20.4753	16.1081	-0.261134
806003	39.262	1.61	-0.0127		20.4847	16.1161	-0.257085
806503	39.238	1.6114	-0.0126		20.4721	16.1301	-0.255061
807003	39.242	1.6124	-0.0125		20.4742	16.1401	-0.253036
807503	39.25	1.6133	-0.0124		20.4784	16.1491	-0.251012
808003	39.262	1.6142	-0.0123		20.4847	16.1582	-0.248988
808503	39.282	1.615	-0.0123		20.4951	16.1662	-0.248988
809003	39.3	1.6161	-0.0122		20.5045	16.1772	-0.246964
809503	39.326	1.6172	-0.0121		20.518	16.1882	-0.244939
810003	39.352	1.6181	-0.012		20.5316	16.1972	-0.242915
810503	39.374	1.619	-0.0119		20.5431	16.2062	-0.240891
811003	39.402	1.6199	-0.0118		20.5577	16.2152	-0.238866
811503	39.43	1.621	-0.0118		20.5723	16.2262	-0.238866
812003	39.458	1.6219	-0.0117		20.5869	16.2352	-0.236842
812503	39.48	1.6229	-0.0116		20.5984	16.2452	-0.234818
813003	39.51	1.624	-0.0114		20.614	16.2563	-0.230769
813503	39.532	1.6251	-0.0114		20.6255	16.2673	-0.230769
814003	39.558	1.626	-0.0113		20.6391	16.2763	-0.228745
814503	39.584	1.6269	-0.0112		20.6527	16.2853	-0.226721
815003	39.606	1.6279	-0.0111		20.6641	16.2953	-0.224696
815503	39.632	1.629	-0.011		20.6777	16.3063	-0.222672
816003	39.658	1.6299	-0.011		20.6913	16.3153	-0.222672
816503	39.692	1.6309	-0.0108		20.709	16.3253	-0.218623
817003	39.724	1.6319	-0.0108		20.7257	16.3353	-0.218623
817503	39.754	1.633	-0.0106		20.7414	16.3463	-0.214575
818003	39.78	1.6339	-0.0106		20.7549	16.3554	-0.214575
818503	39.81	1.6349	-0.0105		20.7706	16.3654	-0.212551
819003	39.84	1.636	-0.0104		20.7862	16.3764	-0.210526
819503	39.866	1.6369	-0.0103		20.7998	16.3854	-0.208502
820003	39.888	1.638	-0.0103		20.8113	16.3964	-0.208502
820503	39.914	1.6389	-0.009		20.8248	16.4054	-0.182186
821003	39.94	1.6399	-0.0091		20.8384	16.4154	-0.184211
821503	39.966	1.6409	-0.009		20.852	16.4254	-0.182186
822003	39.99	1.642	-0.009		20.8645	16.4364	-0.182186
822503	40.016	1.6429	-0.009		20.878	16.4454	-0.182186
823003	40.046	1.6438	-0.009		20.8937	16.4545	-0.182186
823503	40.07	1.6448	-0.009		20.9062	16.4645	-0.182186
824003	40.096	1.6459	-0.0089		20.9198	16.4755	-0.180162
824503	40.122	1.6469	-0.0089		20.9334	16.4855	-0.180162
825003	40.148	1.6479	-0.0089		20.9469	16.4955	-0.180162
825503	40.176	1.6488	-0.009		20.9615	16.5045	-0.182186
826003	40.194	1.6499	-0.0088		20.9709	16.5155	-0.178138
826503	40.222	1.6508	-0.0088		20.9855	16.5245	-0.178138
827003	40.248	1.6518	-0.0087		20.9991	16.5345	-0.176113
827503	40.272	1.653	-0.0087		21.0116	16.5465	-0.176113
828003	40.294	1.6538	-0.0086		21.0231	16.5546	-0.174089
828503	40.32	1.6548	-0.0085		21.0367	16.5646	-0.172065
829003	40.344	1.6558	-0.0084		21.0492	16.5746	-0.17004
829503	40.37	1.6568	-0.0083		21.0627	16.5846	-0.168016
830003	40.396	1.6577	-0.0082		21.0763	16.5936	-0.165992
830503	40.426	1.6587	-0.0082		21.092	16.6036	-0.165992
831003	40.452	1.6599	-0.0081		21.1055	16.6156	-0.163968
831503	40.474	1.6607	-0.0079		21.117	16.6236	-0.159919
832003	40.502	1.6619	-0.0079		21.1316	16.6356	-0.159919
832503	40.524	1.6628	-0.0078		21.1431	16.6446	-0.157895
833003	40.546	1.6637	-0.0077		21.1546	16.6537	-0.15587
833503	40.57	1.6647	-0.0076		21.1671	16.6637	-0.153846
834003	40.596	1.6656	-0.0076		21.1807	16.6727	-0.153846
834503	40.598	1.6668	-0.0075		21.1817	16.6847	-0.151822
835003	40.612	1.6678	-0.0074		21.189	16.6947	-0.149798
835503	40.636	1.6688	-0.0074		21.2015	16.7047	-0.149798
836003	40.658	1.6698	-0.0073		21.213	16.7147	-0.147773
836503	40.68	1.6707	-0.0072		21.2245	16.7237	-0.145749
837003	40.706	1.6717	-0.0071		21.2381	16.7337	-0.143725
837503	40.728	1.6727	-0.007		21.2495	16.7437	-0.1417
838003	40.75	1.6737	-0.0069		21.261	16.7538	-0.139676
838503	40.774	1.6748	-0.0068		21.2735	16.7648	-0.137652
839003	40.796	1.6756	-0.0068		21.285	16.7728	-0.137652
839503	40.82	1.6767	-0.0067		21.2975	16.7838	-0.135628
840003	40.846	1.6777	-0.0066		21.3111	16.7938	-0.133603
840503	40.868	1.6786	-0.0065		21.3226	16.8028	-0.131579
841003	40.894	1.6796	-0.0065		21.3361	16.8128	-0.131579
841503	40.926	1.6806	-0.0064		21.3528	16.8228	-0.129555
842003	40.954	1.6817	-0.0062		21.3674	16.8338	-0.125506
842503	40.982	1.6826	-0.0061		21.3821	16.8428	-0.123482
843003	41.008	1.6837	-0.0061		21.3956	16.8539	-0.123482
843503	41.032	1.6847	-0.006		21.4081	16.8639	-0.121457
844003	41.066	1.6858	-0.0059		21.4259	16.8749	-0.119433
844503	41.102	1.6868	-0.0058		21.4447	16.8849	-0.117409
845003	41.126	1.6877	-0.0058		21.4572	16.8939	-0.117409
845503	41.156	1.689	-0.0057		21.4728	16.9069	-0.115385
846003	41.178	1.6899	-0.0057		21.4843	16.9159	-0.115385
846503	41.202	1.6908	-0.0056		21.4968	16.9249	-0.11336
847003	41.22	1.6917	-0.0054		21.5062	16.9339	-0.109312
847503	41.24	1.6926	-0.0054		21.5167	16.9429	-0.109312
848003	41.264	1.6936	-0.0053		21.5292	16.953	-0.107287
848503	41.298	1.6946	-0.0052		21.5469	16.963	-0.105263
849003	41.324	1.6955	-0.0051		21.5605	16.972	-0.103239
849503	41.35	1.6966	-0.005		21.5741	16.983	-0.101215
850003	41.382	1.6977	-0.005		21.5907	16.994	-0.101215
850503	41.414	1.6987	-0.0049		21.6074	17.004	-0.0991903
851003	41.438	1.6997	-0.0048		21.62	17.014	-0.097166
851503	41.464	1.7007	-0.0047		21.6335	17.024	-0.0951417
852003	41.484	1.7017	-0.0046		21.644	17.034	-0.0931174
852503	41.51	1.7027	-0.0045		21.6575	17.044	-0.0910931
853003	41.534	1.7037	-0.0044		21.6701	17.0541	-0.0890688
853503	41.56	1.7046	-0.0044		21.6836	17.0631	-0.0890688
854003	41.578	1.7057	-0.0042		21.693	17.0741	-0.0850202
854503	41.602	1.7066	-0.0042		21.7055	17.0831	-0.0850202
855003	41.624	1.7076	-0.0041		21.717	17.0931	-0.082996
855503	41.654	1.7085	-0.004		21.7327	17.1021	-0.0809717
856003	41.68	1.7095	-0.0039		21.7462	17.1121	-0.0789474
856503	41.706	1.7107	-0.0038		21.7598	17.1241	-0.0769231
857003	41.732	1.7117	-0.0037		21.7734	17.1341	-0.0748988
857503	41.748	1.7126	-0.0035		21.7817	17.1431	-0.0708502
858003	41.77	1.7136	-0.0034		21.7932	17.1532	-0.0688259
858503	41.792	1.7147	-0.0033		21.8047	17.1642	-0.0668016
859003	41.812	1.7156	-0.0032		21.8151	17.1732	-0.0647773
859503	41.836	1.7166	-0.003		21.8276	17.1832	-0.0607287
860003	41.862	1.7177	-0.003		21.8412	17.1942	-0.0607287
860503	41.884	1.7185	-0.0029		21.8527	17.2022	-0.0587045
861003	41.908	1.7197	-0.0028		21.8652	17.2142	-0.0566802
861503	41.936	1.7207	-0.0027		21.8798	17.2242	-0.0546559
862003	41.96	1.7216	-0.0025		21.8923	17.2332	-0.0506073
862503	41.976	1.7227	-0.0025		21.9007	17.2442	-0.0506073
863003	41.988	1.7236	-0.0024		21.9069	17.2533	-0.048583
863503	41.974	1.7249	-0.0024		21.8996	17.2663	-0.048583
864003	41.974	1.7259	-0.0023		21.8996	17.2763	-0.0465587
864503	41.978	1.7268	-0.0023		21.9017	17.2853	-0.0465587
865003	41.986	1.7278	-0.0022		21.9059	17.2953	-0.0445344
865503	42.002	1.7287	-0.0022		21.9142	17.3043	-0.0445344
866003	42.018	1.7297	-0.0021		21.9226	17.3143	-0.0425101
866503	42.044	1.7306	-0.002		21.9361	17.3233	-0.0404858
867003	42.058	1.7315	-0.0019		21.9434	17.3323	-0.0384615
867503	42.08	1.7325	-0.0019		21.9549	17.3423	-0.0384615
868003	42.102	1.7335	-0.0018		21.9664	17.3524	-0.0364372
868503	42.124	1.7345	-0.0017		21.9779	17.3624	-0.034413
869003	42.148	1.7355	-0.0016		21.9904	17.3724	-0.0323887
869503	42.172	1.7363	-0.0015		22.0029	17.3804	-0.0303644
870003	42.196	1.7375	-0.0014		22.0154	17.3924	-0.0283401
870503	42.228	1.7384	-0.0013		22.0321	17.4014	-0.0263158
871003	42.258	1.7395	-0.0012		22.0478	17.4124	-0.0242915
871503	42.284	1.7406	-0.0012		22.0614	17.4234	-0.0242915
872003	42.308	1.7414	-0.0011		22.0739	17.4314	-0.0222672
872503	42.33	1.7425	-0.0009		22.0854	17.4424	-0.0182186
873003	42.354	1.7435	-0.0009		22.0979	17.4525	-0.0182186
873503	42.376	1.7444	-0.0008		22.1094	17.4615	-0.0161943
874003	42.402	1.7455	-0.0007		22.1229	17.4725	-0.01417
874503	42.426	1.7466	-0.0006		22.1354	17.4835	-0.0121457
875003	42.458	1.7475	-0.0004		22.1521	17.4925	-0.00809717
875503	42.484	1.7486	-0.0004		22.1657	17.5035	-0.00809717
876003	42.514	1.7495	-0.0003		22.1814	17.5125	-0.00607287
876503	42.546	1.7506	-0.0002		22.1981	17.5235	-0.00404858
877003	42.57	1.7517	0		22.2106	17.5345	0
877503	42.592	1.7526	0		22.2221	17.5435	0
878003	42.614	1.7537	0.0001		22.2335	17.5546	0.00202429
878503	42.634	1.7548	0.0002		22.244	17.5656	0.00404858
879003	42.628	1.7557	0.0002		22.2408	17.5746	0.00404858
879503	42.542	1.7576	0.0003		22.196	17.5936	0.00607287
880003	42.486	1.7586	0.0003		22.1668	17.6036	0.00607287
880503	42.456	1.7593	0.0003		22.1511	17.6106	0.00607287
881003	42.442	1.7599	0.0003		22.1438	17.6166	0.00607287
881503	42.446	1.761	0.0004		22.1459	17.6276	0.00809717
882003	42.456	1.7618	0.0005		22.1511	17.6356	0.0101215
882503	42.47	1.7628	0.0006		22.1584	17.6456	0.0121457
883003	42.486	1.7637	0.0007		22.1668	17.6547	0.01417
883503	42.506	1.7645	0.0008		22.1772	17.6627	0.0161943
884003	42.53	1.7656	0.0009		22.1897	17.6737	0.0182186
884503	42.554	1.7666	0.001		22.2022	17.6837	0.0202429
885003	42.578	1.7677	0.0011		22.2148	17.6947	0.0222672
885503	42.604	1.7688	0.0012		22.2283	17.7057	0.0242915
886003	42.626	1.7697	0.0013		22.2398	17.7147	0.0263158
886503	42.65	1.7706	0.0014		22.2523	17.7237	0.0283401
887003	42.674	1.7715	0.0015		22.2648	17.7327	0.0303644
887503	42.702	1.7726	0.0016		22.2794	17.7437	0.0323887
888003	42.724	1.7737	0.0017		22.2909	17.7548	0.034413
888503	42.748	1.7746	0.0017		22.3034	17.7638	0.034413
889003	42.77	1.7756	0.0019		22.3149	17.7738	0.0384615
889503	42.794	1.7765	0.0019		22.3274	17.7828	0.0384615
890003	42.818	1.7774	0.002		22.34	17.7918	0.0404858
890503	42.838	1.7784	0.0021		22.3504	17.8018	0.0425101
891003	42.866	1.7795	0.0022		22.365	17.8128	0.0445344
891503	42.886	1.7806	0.0024		22.3754	17.8238	0.048583
892003	42.908	1.7816	0.0025		22.3869	17.8338	0.0506073
892503	42.93	1.7826	0.0026		22.3984	17.8438	0.0526316
893003	42.954	1.7835	0.0027		22.4109	17.8529	0.0546559
893503	42.972	1.7845	0.0027		22.4203	17.8629	0.0546559
894003	42.998	1.7854	0.0028		22.4339	17.8719	0.0566802
894503	43.022	1.7865	0.0029		22.4464	17.8829	0.0587045
895003	43.048	1.7874	0.003		22.46	17.8919	0.0607287
895503	43.076	1.7885	0.0031		22.4746	17.9029	0.062753
896003	43.108	1.7895	0.0032		22.4913	17.9129	0.0647773
896503	43.146	1.7906	0.0033		22.5111	17.9239	0.0668016
897003	43.182	1.7917	0.0034		22.5299	17.9349	0.0688259
897503	43.218	1.7928	0.0036		22.5487	17.9459	0.0728745
898003	43.246	1.7937	0.0036		22.5633	17.955	0.0728745
898503	43.27	1.7949	0.0037		22.5758	17.967	0.0748988
899003	43.292	1.7957	0.0038		22.5873	17.975	0.0769231
899503	43.312	1.7968	0.004		22.5977	17.986	0.0809717
900003	43.326	1.7977	0.0041		22.605	17.995	0.082996
900503	43.328	1.7987	0.0042		22.6061	18.005	0.0850202
901003	43.252	1.8002	0.0047		22.5664	18.02	0.0951417
901503	43.236	1.8012	0.0049		22.5581	18.03	0.0991903
902003	43.236	1.802	0.0051		22.5581	18.038	0.103239
902503	43.236	1.8029	0.0052		22.5581	18.047	0.105263
903003	43.246	1.804	0.0054		22.5633	18.0581	0.109312
903503	43.258	1.8048	0.0055		22.5695	18.0661	0.111336
904003	43.28	1.8058	0.0056		22.581	18.0761	0.11336
904503	43.298	1.8068	0.0057		22.5904	18.0861	0.115385
905003	43.318	1.8077	0.0058		22.6008	18.0951	0.117409
905503	43.34	1.8088	0.006		22.6123	18.1061	0.121457
906003	43.362	1.8097	0.006		22.6238	18.1151	0.121457
906503	43.388	1.8106	0.0062		22.6374	18.1241	0.125506
907003	43.416	1.8117	0.0063		22.652	18.1351	0.12753
907503	43.438	1.8128	0.0063		22.6635	18.1461	0.12753
908003	43.462	1.8137	0.0064		22.676	18.1552	0.129555
908503	43.48	1.8146	0.0065		22.6854	18.1642	0.131579
909003	43.502	1.8156	0.0067		22.6968	18.1742	0.135628
909503	43.528	1.8168	0.0068		22.7104	18.1862	0.137652
910003	43.548	1.8176	0.0068		22.7208	18.1942	0.137652
910503	43.57	1.8186	0.007		22.7323	18.2042	0.1417
911003	43.596	1.8195	0.0071		22.7459	18.2132	0.143725
911503	43.616	1.8205	0.0072		22.7563	18.2232	0.145749
912003	43.65	1.8217	0.0073		22.7741	18.2352	0.147773
912503	43.678	1.8226	0.0074		22.7887	18.2442	0.149798
913003	43.708	1.8236	0.0075		22.8043	18.2543	0.151822
913503	43.734	1.8246	0.0076		22.8179	18.2643	0.153846
914003	43.754	1.8256	0.0077		22.8283	18.2743	0.15587
914503	43.78	1.8265	0.0078		22.8419	18.2833	0.157895
915003	43.814	1.8276	0.0079		22.8596	18.2943	0.159919
915503	43.84	1.8289	0.008		22.8732	18.3073	0.161943
916003	43.768	1.8304	0.0088		22.8356	18.3223	0.178138
916503	43.752	1.8314	0.0089		22.8273	18.3323	0.180162
917003	43.734	1.8322	0.0089		22.8179	18.3403	0.180162
917503	43.73	1.833	0.0089		22.8158	18.3483	0.180162
918003	43.732	1.8338	0.009		22.8168	18.3564	0.182186
918503	43.742	1.8347	0.009		22.8221	18.3654	0.182186
919003	43.754	1.8356	0.009		22.8283	18.3744	0.182186
919503	43.778	1.8365	0.0089		22.8408	18.3834	0.180162
920003	43.8	1.8376	0.009		22.8523	18.3944	0.182186
920503	43.824	1.8385	0.009		22.8648	18.4034	0.182186
921003	43.848	1.8396	0.0091		22.8774	18.4144	0.184211
921503	43.896	1.8409	0.0091		22.9024	18.4274	0.184211
922003	43.93	1.842	0.0092		22.9201	18.4384	0.186235
922503	43.96	1.8429	0.0093		22.9358	18.4474	0.188259
923003	43.98	1.8441	0.0094		22.9462	18.4595	0.190283
923503	43.998	1.8449	0.0094		22.9556	18.4675	0.190283
924003	44.016	1.8459	0.0096		22.965	18.4775	0.194332
924503	44.034	1.8468	0.0097		22.9744	18.4865	0.196356
925003	44.054	1.8479	0.0098		22.9848	18.4975	0.198381
925503	44.072	1.849	0.0099		22.9942	18.5085	0.200405
926003	44.092	1.8499	0.01		23.0047	18.5175	0.202429
926503	44.114	1.8508	0.01		23.0161	18.5265	0.202429
927003	44.138	1.8519	0.0101		23.0287	18.5375	0.204453
927503	44.16	1.853	0.0102		23.0401	18.5485	0.206478
928003	44.182	1.8538	0.0103		23.0516	18.5566	0.208502
928503	44.206	1.8548	0.0104		23.0641	18.5666	0.210526
929003	44.222	1.8558	0.0105		23.0725	18.5766	0.212551
929503	44.246	1.8567	0.0106		23.085	18.5856	0.214575
930003	44.266	1.8577	0.0107		23.0955	18.5956	0.216599
930503	44.288	1.8588	0.0108		23.1069	18.6066	0.218623
931003	44.316	1.8597	0.0109		23.1215	18.6156	0.220648
931503	44.34	1.8608	0.011		23.1341	18.6266	0.222672
932003	44.366	1.8616	0.0111		23.1476	18.6346	0.224696
932503	44.394	1.8626	0.0112		23.1622	18.6446	0.226721
933003	44.414	1.8637	0.0113		23.1727	18.6557	0.228745
933503	44.442	1.8647	0.0114		23.1873	18.6657	0.230769
934003	44.466	1.8657	0.0115		23.1998	18.6757	0.232794
934503	44.484	1.8668	0.0116		23.2092	18.6867	0.234818
935003	44.508	1.8677	0.0117		23.2217	18.6957	0.236842
935503	44.524	1.8687	0.0118		23.2301	18.7057	0.238866
936003	44.548	1.8697	0.0119		23.2426	18.7157	0.240891
936503	44.57	1.8707	0.012		23.2541	18.7257	0.242915
937003	44.592	1.8716	0.0121		23.2655	18.7347	0.244939
937503	44.616	1.8727	0.0122		23.2781	18.7457	0.246964
938003	44.638	1.8736	0.0123		23.2895	18.7548	0.248988
938503	44.658	1.8745	0.0124		23.3	18.7638	0.251012
939003	44.68	1.8757	0.0125		23.3115	18.7758	0.253036
939503	44.702	1.8767	0.0126		23.3229	18.7858	0.255061
940003	44.724	1.8776	0.0127		23.3344	18.7948	0.257085
940503	44.748	1.8785	0.0128		23.3469	18.8038	0.259109
941003	44.768	1.8796	0.0129		23.3574	18.8148	0.261134
941503	44.788	1.8806	0.013		23.3678	18.8248	0.263158
942003	44.806	1.8815	0.0131		23.3772	18.8338	0.265182
942503	44.828	1.8825	0.0132		23.3887	18.8438	0.267206
943003	44.856	1.8836	0.0133		23.4033	18.8549	0.269231
943503	44.88	1.8846	0.0134		23.4158	18.8649	0.271255
944003	44.904	1.8856	0.0135		23.4283	18.8749	0.273279
944503	44.924	1.8866	0.0136		23.4388	18.8849	0.275304
945003	44.944	1.8875	0.0137		23.4492	18.8939	0.277328
945503	44.966	1.8886	0.0138		23.4607	18.9049	0.279352
946003	44.984	1.8896	0.0139		23.4701	18.9149	0.281377
946503	45.004	1.8904	0.014		23.4805	18.9229	0.283401
947003	45.028	1.8915	0.0142		23.493	18.9339	0.287449
947503	45.044	1.8924	0.0142		23.5014	18.9429	0.287449
948003	45.066	1.8935	0.0144		23.5128	18.954	0.291498
948503	45.086	1.8946	0.0144		23.5233	18.965	0.291498
949003	45.1	1.8956	0.0145		23.5306	18.975	0.293522
949503	45.116	1.8965	0.0147		23.5389	18.984	0.297571
950003	45.12	1.8975	0.0149		23.541	18.994	0.301619
950503	45.134	1.8986	0.015		23.5483	19.005	0.303644
951003	45.15	1.8997	0.0151		23.5567	19.016	0.305668
951503	45.164	1.9005	0.0152		23.564	19.024	0.307692
952003	45.178	1.9015	0.0154		23.5713	19.034	0.311741
952503	45.194	1.9025	0.0155		23.5796	19.044	0.313765
953003	45.216	1.9036	0.0156		23.5911	19.0551	0.315789
953503	45.232	1.9046	0.0157		23.5995	19.0651	0.317814
954003	45.248	1.9055	0.0158		23.6078	19.0741	0.319838
954503	45.262	1.9066	0.0159		23.6151	19.0851	0.321862
955003	45.136	1.9083	0.0163		23.5494	19.1021	0.32996
955503	45.078	1.9091	0.0167		23.5191	19.1101	0.338057
956003	44.968	1.9109	0.0168		23.4617	19.1281	0.340081
956503	44.682	1.9118	0.0174		23.3125	19.1371	0.352227
957003	44.4	1.9113	0.0175		23.1654	19.1321	0.354251
957503	44.618	1.9127	0.0177		23.2791	19.1461	0.3583
958003	44.368	1.9135	0.018		23.1487	19.1542	0.364372
958503	44.73	1.9157	0.0182		23.3375	19.1762	0.368421
959003	44.398	1.915	0.0183		23.1643	19.1692	0.370445
959503	44.448	1.9167	0.0185		23.1904	19.1862	0.374494
960003	44.782	1.9189	0.0186		23.3647	19.2082	0.376518
960503	44.612	1.9185	0.0188		23.276	19.2042	0.380567
961003	44.526	1.9197	0.019		23.2311	19.2162	0.384615
961503	44.838	1.9218	0.0191		23.3939	19.2372	0.38664
962003	44.486	1.9212	0.0192		23.2102	19.2312	0.388664
962503	44.822	1.9236	0.0194		23.3855	19.2553	0.392713
963003	44.598	1.923	0.0195		23.2687	19.2492	0.394737
963503	44.816	1.9256	0.0197		23.3824	19.2753	0.398785
964003	44.728	1.9252	0.0197		23.3365	19.2713	0.398785
964503	44.904	1.9276	0.0199		23.4283	19.2953	0.402834
965003	44.764	1.9273	0.02		23.3553	19.2923	0.404858
965503	44.968	1.9293	0.0202		23.4617	19.3123	0.408907
966003	44.732	1.9295	0.0203		23.3386	19.3143	0.410931
966503	45.066	1.9315	0.0204		23.5128	19.3343	0.412955
967003	44.714	1.931	0.0206		23.3292	19.3293	0.417004
967503	45.016	1.9336	0.0208		23.4868	19.3554	0.421053
968003	44.85	1.9331	0.0208		23.4002	19.3504	0.421053
968503	45.044	1.9352	0.021		23.5014	19.3714	0.425101
969003	44.924	1.9351	0.0211		23.4388	19.3704	0.427126
969503	45.226	1.9378	0.0212		23.5963	19.3974	0.42915
970003	44.94	1.9371	0.0214		23.4471	19.3904	0.433198
970503	44.976	1.9388	0.0215		23.4659	19.4074	0.435223
971003	45.286	1.9406	0.0216		23.6276	19.4254	0.437247
971503	45.074	1.9403	0.0218		23.517	19.4224	0.441296
972003	45.172	1.942	0.022		23.5682	19.4394	0.445344
972503	45.098	1.9419	0.022		23.5295	19.4384	0.445344
973003	45.196	1.944	0.0222		23.5807	19.4595	0.449393
973503	45.094	1.9439	0.0223		23.5275	19.4585	0.451417
974003	45.354	1.9467	0.0225		23.6631	19.4865	0.455466
974503	45.13	1.9462	0.0226		23.5462	19.4815	0.45749
975003	45.384	1.9481	0.0227		23.6788	19.5005	0.459514
975503	45.228	1.9488	0.0228		23.5974	19.5075	0.461538
976003	45.244	1.9489	0.0228		23.6057	19.5085	0.461538
976503	45.48	1.9519	0.0231		23.7288	19.5385	0.467611
977003	45.274	1.9514	0.0232		23.6214	19.5335	0.469636
977503	45.338	1.952	0.0232		23.6548	19.5395	0.469636
978003	45.39	1.9543	0.0235		23.6819	19.5626	0.475709
978503	45.33	1.954	0.0236		23.6506	19.5596	0.477733
979003	45.558	1.9567	0.0238		23.7695	19.5866	0.481781
979503	45.408	1.9566	0.0239		23.6913	19.5856	0.483806
980003	45.448	1.9573	0.024		23.7122	19.5926	0.48583
980503	45.6	1.9596	0.0242		23.7915	19.6156	0.489879
981003	45.608	1.9604	0.0244		23.7956	19.6236	0.493927
981503	45.596	1.9612	0.0246		23.7894	19.6316	0.497976
982003	45.598	1.9621	0.0247		23.7904	19.6406	0.5
982503	45.602	1.9629	0.0248		23.7925	19.6486	0.502024
983003	45.608	1.9638	0.025		23.7956	19.6577	0.506073
983503	45.62	1.9648	0.0251		23.8019	19.6677	0.508097
984003	45.634	1.9658	0.0252		23.8092	19.6777	0.510121
984503	45.654	1.9665	0.0254		23.8196	19.6847	0.51417
985003	45.676	1.9677	0.0255		23.8311	19.6967	0.516194
985503	45.702	1.9687	0.0256		23.8447	19.7067	0.518219
986003	45.718	1.9697	0.0257		23.853	19.7167	0.520243
986503	45.732	1.9706	0.0259		23.8603	19.7257	0.524291
987003	45.752	1.9716	0.0261		23.8708	19.7357	0.52834
987503	45.77	1.9728	0.0262		23.8802	19.7477	0.530364
988003	45.784	1.9738	0.0264		23.8875	19.7578	0.534413
988503	45.822	1.9746	0.0286		23.9073	19.7658	0.578947
989003	45.866	1.9758	0.0287		23.9302	19.7778	0.580972
989503	45.79	1.9782	0.0287		23.8906	19.8018	0.580972
990003	45.614	1.9788	0.0289		23.7988	19.8078	0.58502
990503	45.524	1.9793	0.0289		23.7518	19.8128	0.58502
991003	45.22	1.9791	0.0289		23.5932	19.8108	0.58502
991503	45.256	1.9805	0.029		23.612	19.8248	0.587045
992003	45.51	1.9821	0.0291		23.7445	19.8408	0.589069
992503	45.364	1.9827	0.0293		23.6683	19.8468	0.593117
993003	45.412	1.9831	0.0293		23.6934	19.8509	0.593117
993503	45.484	1.9852	0.0295		23.7309	19.8719	0.597166
994003	45.296	1.9849	0.0297		23.6328	19.8689	0.601215
994503	45.654	1.9879	0.0299		23.8196	19.8989	0.605263
995003	45.334	1.987	0.0299		23.6527	19.8899	0.605263
995503	45.67	1.9897	0.0302		23.828	19.9169	0.611336
996003	45.348	1.9888	0.0302		23.66	19.9079	0.611336
996503	45.704	1.9916	0.0304		23.8457	19.9359	0.615385
[truncated: 630 more rows]

## Sheet: C-2
Time: 17:27:23,06/20/2019
diameter: 49.7	mm	height: 100	mm
Vertical 100kN force sensor (vertical force of test piece)
Control mode: displacement	Waveform: ramp
mm/s	End point: 1.4956	mm
time (ms)	vertical force (KN)	vertical deformation (mm)	transverse deformation (mm)		stress	axial strain	transverse strain
0	0	0	0		0	0	0
101	0.062	0.0021	0		0.0319587	0.021	0
201	0.06	0.0037	0.0001		0.0309278	0.037	0.00201207
302	0.054	0.0035	0		0.027835	0.035	0
403	0.102	0.0054	0.0001		0.0525772	0.054	0.00201207
504	0.096	0.0064	0.0001		0.0494844	0.064	0.00201207
605	0.092	0.0065	0.0002		0.0474226	0.065	0.00402414
706	0.142	0.0085	0.0003		0.0731957	0.085	0.00603622
806	0.14	0.0094	0.0003		0.0721648	0.094	0.00603622
907	0.14	0.0093	0.0002		0.0721648	0.093	0.00402414
1008	0.176	0.0108	0.0002		0.0907215	0.108	0.00402414
1109	0.194	0.0112	0.0002		0.0999998	0.112	0.00402414
1210	0.232	0.0121	0		0.119587	0.121	0
1311	0.27	0.0131	-0.0002		0.139175	0.131	-0.00402414
1411	0.306	0.0147	-0.0003		0.157732	0.147	-0.00603622
1512	0.336	0.0159	-0.0006		0.173196	0.159	-0.0120724
1613	0.362	0.0172	-0.0007		0.186598	0.172	-0.0140845
1714	0.388	0.0179	-0.0007		0.2	0.179	-0.0140845
1815	0.412	0.019	-0.0008		0.212371	0.19	-0.0160966
1916	0.438	0.0199	-0.0008		0.225773	0.199	-0.0160966
2016	0.466	0.0208	-0.0009		0.240206	0.208	-0.0181087
2117	0.494	0.0216	-0.0009		0.254639	0.216	-0.0181087
2218	0.524	0.0224	-0.0009		0.270103	0.224	-0.0181087
2319	0.556	0.0233	-0.0008		0.286597	0.233	-0.0160966
2420	0.596	0.024	-0.0009		0.307216	0.24	-0.0181087
2521	0.646	0.0248	-0.0009		0.332989	0.248	-0.0181087
2622	0.704	0.0257	-0.0009		0.362886	0.257	-0.0181087
2722	0.774	0.0267	-0.0008		0.398968	0.267	-0.0160966
2823	0.848	0.0277	-0.0007		0.437112	0.277	-0.0140845
2924	0.932	0.0288	-0.0007		0.480411	0.288	-0.0140845
3025	1.02	0.0299	-0.0004		0.525772	0.299	-0.00804829
3126	1.112	0.0308	-0.0003		0.573195	0.308	-0.00603622
3227	1.208	0.0321	-0.0002		0.622679	0.321	-0.00402414
3327	1.308	0.0332	-0.0002		0.674225	0.332	-0.00402414
3428	1.408	0.0343	0		0.725772	0.343	0
3529	1.504	0.0354	0.0007		0.775256	0.354	0.0140845
3630	1.604	0.0366	0.0016		0.826802	0.366	0.0321932
3731	1.704	0.0378	0.0024		0.878349	0.378	0.0482897
3832	1.79	0.0388	0.003		0.922678	0.388	0.0603622
3932	1.874	0.0398	0.0035		0.965977	0.398	0.0704225
4033	1.956	0.041	0.0041		1.00825	0.41	0.082495
4134	2.038	0.0423	0.0047		1.05051	0.423	0.0945674
4235	2.11	0.0434	0.0053		1.08763	0.434	0.10664
4336	2.182	0.0444	0.0059		1.12474	0.444	0.118712
4437	2.232	0.0451	0.0062		1.15051	0.451	0.124748
4537	2.29	0.0461	0.0067		1.18041	0.461	0.134809
4638	2.344	0.0471	0.0071		1.20824	0.471	0.142857
4739	2.402	0.0483	0.0076		1.23814	0.483	0.152918
4840	2.46	0.0493	0.0079		1.26804	0.493	0.158954
4941	2.514	0.0503	0.0084		1.29587	0.503	0.169014
5042	2.556	0.0512	0.0093		1.31752	0.512	0.187123
5143	2.618	0.0523	0.0098		1.34948	0.523	0.197183
5243	2.678	0.0534	0.0101		1.38041	0.534	0.203219
5344	2.734	0.0544	0.0107		1.40928	0.544	0.215292
5445	2.79	0.0554	0.011		1.43814	0.554	0.221328
5546	2.844	0.0565	0.0115		1.46598	0.565	0.231388
5647	2.9	0.0574	0.012		1.49484	0.574	0.241449
5748	2.96	0.0586	0.0123		1.52577	0.586	0.247485
5848	3.014	0.0595	0.0128		1.5536	0.595	0.257545
5949	3.072	0.0605	0.0132		1.5835	0.605	0.265594
6050	3.132	0.0614	0.0137		1.61443	0.614	0.275654
6151	3.19	0.0624	0.0142		1.64433	0.624	0.285714
6252	3.248	0.0634	0.0146		1.67422	0.634	0.293763
6353	3.306	0.0644	0.0151		1.70412	0.644	0.303823
6453	3.366	0.0653	0.0155		1.73505	0.653	0.311871
6554	3.42	0.0664	0.016		1.76288	0.664	0.321932
6655	3.48	0.0674	0.0164		1.79381	0.674	0.32998
6756	3.536	0.0685	0.0169		1.82268	0.685	0.34004
6857	3.592	0.0695	0.0173		1.85154	0.695	0.348089
6958	3.646	0.0704	0.0178		1.87938	0.704	0.358149
7059	3.706	0.0715	0.0181		1.91031	0.715	0.364185
7159	3.758	0.0722	0.0186		1.93711	0.722	0.374245
7260	3.812	0.0733	0.0189		1.96494	0.733	0.380282
7361	3.868	0.0742	0.0194		1.99381	0.742	0.390342
7462	3.92	0.0749	0.0199		2.02061	0.749	0.400402
7563	3.974	0.076	0.0202		2.04845	0.76	0.406439
7664	4.034	0.0769	0.0207		2.07938	0.769	0.416499
7764	4.092	0.078	0.0212		2.10927	0.78	0.426559
7865	4.152	0.0791	0.0214		2.1402	0.791	0.430584
7966	4.212	0.0802	0.0219		2.17113	0.802	0.440644
8067	4.268	0.0812	0.0223		2.2	0.812	0.448692
8168	4.326	0.0822	0.0226		2.22989	0.822	0.454728
8269	4.386	0.0832	0.023		2.26082	0.832	0.462777
8369	4.446	0.0843	0.0234		2.29175	0.843	0.470825
8470	4.506	0.0855	0.0237		2.32268	0.855	0.476861
8571	4.564	0.0866	0.0241		2.35257	0.866	0.484909
8672	4.618	0.0875	0.0245		2.38041	0.875	0.492958
8773	4.678	0.0886	0.0248		2.41134	0.886	0.498994
8874	4.732	0.0894	0.0251		2.43917	0.894	0.50503
8974	4.786	0.0905	0.0254		2.46701	0.905	0.511066
9075	4.84	0.0914	0.0258		2.49484	0.914	0.519115
9176	4.898	0.0925	0.0261		2.52474	0.925	0.525151
9277	4.952	0.0934	0.0263		2.55257	0.934	0.529175
9378	5.008	0.0943	0.0267		2.58144	0.943	0.537223
9479	5.066	0.0953	0.0269		2.61133	0.953	0.541247
9579	5.124	0.0963	0.0272		2.64123	0.963	0.547284
9680	5.182	0.0974	0.0275		2.67113	0.974	0.55332
9781	5.24	0.0983	0.0279		2.70103	0.983	0.561368
9882	5.298	0.0995	0.0282		2.73092	0.995	0.567404
9983	5.356	0.1005	0.0285		2.76082	1.005	0.573441
10084	5.412	0.1016	0.0287		2.78968	1.016	0.577465
10185	5.472	0.1026	0.029		2.82061	1.026	0.583501
10285	5.528	0.1035	0.0293		2.84948	1.035	0.589537
10386	5.586	0.1047	0.0296		2.87938	1.047	0.595573
10487	5.64	0.1055	0.0299		2.90721	1.055	0.60161
10588	5.704	0.1066	0.0302		2.9402	1.066	0.607646
10689	5.76	0.1076	0.0304		2.96907	1.076	0.61167
10790	5.824	0.1086	0.0306		3.00206	1.086	0.615694
10890	5.88	0.1096	0.0309		3.03092	1.096	0.62173
10991	5.938	0.1107	0.0312		3.06082	1.107	0.627767
11092	5.996	0.1118	0.0315		3.09072	1.118	0.633803
11193	6.054	0.1127	0.0318		3.12061	1.127	0.639839
11294	6.112	0.1139	0.032		3.15051	1.139	0.643863
11395	6.172	0.1148	0.0322		3.18144	1.148	0.647887
11495	6.226	0.1158	0.0325		3.20927	1.158	0.653924
11596	6.286	0.1167	0.0327		3.2402	1.167	0.657948
11697	6.344	0.1177	0.033		3.2701	1.177	0.663984
11798	6.406	0.1187	0.0333		3.30205	1.187	0.67002
11899	6.462	0.1197	0.0334		3.33092	1.197	0.672032
12000	6.522	0.1207	0.0337		3.36185	1.207	0.678068
12101	6.582	0.1219	0.0339		3.39278	1.219	0.682093
12201	6.642	0.1229	0.0341		3.4237	1.229	0.686117
12302	6.704	0.1239	0.0344		3.45566	1.239	0.692153
12403	6.762	0.1248	0.0347		3.48556	1.248	0.698189
12504	6.824	0.126	0.0349		3.51752	1.26	0.702213
12605	6.882	0.1268	0.0351		3.54742	1.268	0.706237
12706	6.946	0.128	0.0354		3.5804	1.28	0.712274
12806	7.008	0.129	0.0356		3.61236	1.29	0.716298
12907	7.07	0.1301	0.0358		3.64432	1.301	0.720322
13008	7.134	0.1312	0.036		3.67731	1.312	0.724346
13109	7.202	0.1323	0.0362		3.71236	1.323	0.72837
13210	7.266	0.1334	0.0365		3.74535	1.334	0.734406
13311	7.332	0.1345	0.0368		3.77937	1.345	0.740443
13411	7.394	0.1356	0.037		3.81133	1.356	0.744467
13512	7.43	0.1363	0.037		3.82989	1.363	0.744467
13613	7.472	0.1372	0.0373		3.85154	1.372	0.750503
13714	7.52	0.1378	0.0375		3.87628	1.378	0.754527
13815	7.584	0.1388	0.0377		3.90927	1.388	0.758551
13916	7.658	0.1401	0.0378		3.94741	1.401	0.760563
14016	7.738	0.1413	0.0381		3.98865	1.413	0.7666
14117	7.812	0.1425	0.0383		4.0268	1.425	0.770624
14218	7.886	0.1437	0.0386		4.06494	1.437	0.77666
14319	7.95	0.1447	0.0387		4.09793	1.447	0.778672
14420	8.006	0.1458	0.039		4.1268	1.458	0.784708
14521	8.034	0.1465	0.0391		4.14123	1.465	0.78672
14622	8.06	0.1471	0.0393		4.15463	1.471	0.790744
14722	8.108	0.1478	0.0394		4.17937	1.478	0.792757
14823	8.2	0.149	0.0396		4.2268	1.49	0.796781
14924	8.294	0.1504	0.0399		4.27525	1.504	0.802817
15025	8.372	0.1516	0.04		4.31545	1.516	0.804829
15126	8.428	0.1527	0.0403		4.34432	1.527	0.810865
15227	8.462	0.1535	0.0404		4.36185	1.535	0.812877
15327	8.494	0.1541	0.0405		4.37834	1.541	0.814889
15428	8.556	0.155	0.0407		4.4103	1.55	0.818913
15529	8.638	0.1563	0.041		4.45257	1.563	0.82495
15630	8.716	0.1574	0.0412		4.49277	1.574	0.828974
15731	8.788	0.1586	0.0415		4.52989	1.586	0.83501
15832	8.86	0.1597	0.0416		4.567	1.597	0.837022
15932	8.916	0.1607	0.0418		4.59587	1.607	0.841046
16033	8.976	0.1617	0.042		4.62679	1.617	0.84507
16134	9.034	0.1626	0.0422		4.65669	1.626	0.849095
16235	9.086	0.1635	0.0423		4.6835	1.635	0.851107
16336	9.138	0.1643	0.0426		4.7103	1.643	0.857143
16437	9.194	0.1652	0.0427		4.73917	1.652	0.859155
16537	9.254	0.1662	0.0428		4.77009	1.662	0.861167
16638	9.322	0.1671	0.043		4.80514	1.671	0.865191
16739	9.388	0.1683	0.0432		4.83916	1.683	0.869215
16840	9.456	0.1693	0.0433		4.87422	1.693	0.871227
16941	9.522	0.1703	0.0435		4.90824	1.703	0.875252
17042	9.586	0.1713	0.0437		4.94123	1.713	0.879276
17143	9.656	0.1725	0.044		4.97731	1.725	0.885312
17243	9.72	0.1734	0.0441		5.0103	1.734	0.887324
17344	9.788	0.1744	0.0442		5.04535	1.744	0.889336
17445	9.858	0.1756	0.0444		5.08143	1.756	0.89336
17546	9.928	0.1767	0.0446		5.11751	1.767	0.897384
17647	9.99	0.1776	0.0448		5.14947	1.776	0.901408
17748	10.056	0.1785	0.045		5.18349	1.785	0.905433
17848	10.12	0.1796	0.0452		5.21648	1.796	0.909457
17949	10.182	0.1805	0.0453		5.24844	1.805	0.911469
18050	10.242	0.1815	0.0455		5.27937	1.815	0.915493
18151	10.308	0.1824	0.0457		5.31339	1.824	0.919517
18252	10.374	0.1835	0.0459		5.34741	1.835	0.923541
18353	10.434	0.1844	0.046		5.37834	1.844	0.925553
18453	10.502	0.1854	0.0462		5.41339	1.854	0.929577
18554	10.568	0.1864	0.0463		5.44741	1.864	0.93159
18655	10.632	0.1873	0.0465		5.4804	1.873	0.935614
18756	10.7	0.1883	0.0467		5.51545	1.883	0.939638
18857	10.772	0.1894	0.0469		5.55257	1.894	0.943662
18958	10.842	0.1905	0.047		5.58865	1.905	0.945674
19059	10.91	0.1915	0.0472		5.6237	1.915	0.949698
19159	10.976	0.1924	0.0473		5.65772	1.924	0.95171
19260	11.042	0.1936	0.0474		5.69174	1.936	0.953722
19361	11.108	0.1945	0.0477		5.72576	1.945	0.959759
19462	11.182	0.1955	0.0479		5.76391	1.955	0.963783
19563	11.248	0.1967	0.0481		5.79793	1.967	0.967807
19664	11.314	0.1976	0.0482		5.83195	1.976	0.969819
19764	11.378	0.1986	0.0483		5.86494	1.986	0.971831
19865	11.446	0.1995	0.0485		5.89999	1.995	0.975855
19966	11.514	0.2005	0.0486		5.93504	2.005	0.977867
20067	11.578	0.2015	0.0488		5.96803	2.015	0.981891
20168	11.648	0.2026	0.049		6.00411	2.026	0.985915
20269	11.724	0.2036	0.0491		6.04329	2.036	0.987928
20369	11.792	0.2048	0.0492		6.07834	2.048	0.98994
20470	11.864	0.2058	0.0494		6.11545	2.058	0.993964
20571	11.932	0.2066	0.0495		6.1505	2.066	0.995976
20672	12.002	0.2076	0.0496		6.18658	2.076	0.997988
20773	12.068	0.2086	0.0498		6.22061	2.086	1.00201
20874	12.136	0.2097	0.05		6.25566	2.097	1.00604
20974	12.206	0.2107	0.0501		6.29174	2.107	1.00805
21075	12.272	0.2117	0.0503		6.32576	2.117	1.01207
21176	12.34	0.2127	0.0504		6.36081	2.127	1.01408
21277	12.408	0.2137	0.0505		6.39586	2.137	1.0161
21378	12.476	0.2145	0.0507		6.43091	2.145	1.02012
21479	12.548	0.2155	0.0508		6.46803	2.155	1.02213
21579	12.624	0.2166	0.0509		6.5072	2.166	1.02414
21680	12.698	0.2177	0.0511		6.54535	2.177	1.02817
21781	12.768	0.2188	0.0512		6.58143	2.188	1.03018
21882	12.836	0.2198	0.0514		6.61648	2.198	1.03421
21983	12.902	0.2209	0.0514		6.6505	2.209	1.03421
22084	12.97	0.2218	0.0516		6.68555	2.218	1.03823
22185	13.038	0.2227	0.0518		6.7206	2.227	1.04225
22285	13.106	0.2237	0.0519		6.75566	2.237	1.04427
22386	13.182	0.2247	0.052		6.79483	2.247	1.04628
22487	13.25	0.2258	0.0522		6.82988	2.258	1.0503
22588	13.324	0.2269	0.0523		6.86803	2.269	1.05231
22689	13.396	0.2278	0.0524		6.90514	2.278	1.05433
22790	13.464	0.2288	0.0525		6.94019	2.288	1.05634
22890	13.532	0.2299	0.0526		6.97524	2.299	1.05835
22991	13.6	0.2307	0.0527		7.01029	2.307	1.06036
23092	13.672	0.2317	0.0528		7.04741	2.317	1.06237
23193	13.744	0.2329	0.053		7.08452	2.329	1.0664
23294	13.816	0.2337	0.0531		7.12163	2.337	1.06841
23395	13.886	0.2348	0.0532		7.15772	2.348	1.07042
23495	13.962	0.2358	0.0533		7.19689	2.358	1.07243
23596	14.032	0.2369	0.0534		7.23297	2.369	1.07445
23697	14.102	0.238	0.0536		7.26906	2.38	1.07847
23798	14.172	0.2389	0.0537		7.30514	2.389	1.08048
23899	14.238	0.24	0.0538		7.33916	2.4	1.08249
24000	14.306	0.2411	0.054		7.37421	2.411	1.08652
24101	14.372	0.2421	0.0542		7.40823	2.421	1.09054
24201	14.442	0.2429	0.0542		7.44431	2.429	1.09054
24302	14.514	0.244	0.0543		7.48143	2.44	1.09256
24403	14.586	0.245	0.0545		7.51854	2.45	1.09658
24504	14.654	0.246	0.0545		7.55359	2.46	1.09658
24605	14.726	0.247	0.0547		7.59071	2.47	1.1006
24706	14.798	0.248	0.0548		7.62782	2.48	1.10262
24806	14.868	0.2489	0.0549		7.6639	2.489	1.10463
24907	14.936	0.2501	0.055		7.69895	2.501	1.10664
25008	15.004	0.251	0.0552		7.734	2.51	1.11066
25109	15.072	0.252	0.0553		7.76906	2.52	1.11268
25210	15.144	0.2531	0.0553		7.80617	2.531	1.11268
25311	15.212	0.254	0.0554		7.84122	2.54	1.11469
25411	15.28	0.255	0.0554		7.87627	2.55	1.11469
25512	15.35	0.2562	0.0555		7.91235	2.562	1.1167
25613	15.42	0.2571	0.0556		7.94844	2.571	1.11871
25714	15.486	0.2582	0.0558		7.98246	2.582	1.12274
25815	15.552	0.2592	0.0558		8.01648	2.592	1.12274
25916	15.622	0.2601	0.0558		8.05256	2.601	1.12274
26016	15.696	0.2611	0.056		8.0907	2.611	1.12676
26117	15.758	0.262	0.056		8.12266	2.62	1.12676
26218	15.826	0.263	0.056		8.15771	2.63	1.12676
26319	15.896	0.2641	0.0562		8.1938	2.641	1.13078
26420	15.968	0.2651	0.0563		8.23091	2.651	1.1328
26521	16.038	0.2661	0.0564		8.26699	2.661	1.13481
26622	16.108	0.2671	0.0564		8.30308	2.671	1.13481
26722	16.178	0.2682	0.0565		8.33916	2.682	1.13682
26823	16.246	0.2692	0.0566		8.37421	2.692	1.13883
26924	16.312	0.2701	0.0566		8.40823	2.701	1.13883
27025	16.384	0.2711	0.0567		8.44534	2.711	1.14085
27126	16.458	0.2721	0.0568		8.48349	2.721	1.14286
27227	16.526	0.2732	0.0568		8.51854	2.732	1.14286
27327	16.594	0.2741	0.0569		8.55359	2.741	1.14487
27428	16.668	0.2752	0.057		8.59173	2.752	1.14688
27529	16.736	0.2761	0.0571		8.62679	2.761	1.14889
27630	16.804	0.277	0.0572		8.66184	2.77	1.15091
27731	16.872	0.2781	0.0572		8.69689	2.781	1.15091
27832	16.944	0.2789	0.0573		8.734	2.789	1.15292
27932	17.014	0.2801	0.0573		8.77008	2.801	1.15292
28033	17.09	0.281	0.0574		8.80926	2.81	1.15493
28134	17.158	0.2821	0.0575		8.84431	2.821	1.15694
28235	17.228	0.283	0.0576		8.88039	2.83	1.15895
28336	17.298	0.284	0.0576		8.91648	2.84	1.15895
28437	17.368	0.2851	0.0577		8.95256	2.851	1.16097
28537	17.438	0.2861	0.0578		8.98864	2.861	1.16298
28638	17.51	0.2871	0.0578		9.02575	2.871	1.16298
28739	17.582	0.2882	0.0579		9.06287	2.882	1.16499
28840	17.658	0.2892	0.0579		9.10204	2.892	1.16499
28941	17.732	0.2902	0.058		9.14019	2.902	1.167
29042	17.804	0.2912	0.0581		9.1773	2.912	1.16901
29143	17.872	0.2922	0.0582		9.21235	2.922	1.17103
29243	17.946	0.2932	0.0583		9.2505	2.932	1.17304
29344	18.016	0.2943	0.0583		9.28658	2.943	1.17304
29445	18.086	0.2953	0.0583		9.32266	2.953	1.17304
29546	18.152	0.2961	0.0584		9.35668	2.961	1.17505
29647	18.224	0.2971	0.0585		9.39379	2.971	1.17706
29748	18.296	0.2981	0.0586		9.43091	2.981	1.17907
29848	18.366	0.2991	0.0586		9.46699	2.991	1.17907
29949	18.44	0.3001	0.0587		9.50513	3.001	1.18109
30050	18.512	0.3012	0.0587		9.54225	3.012	1.18109
30151	18.582	0.302	0.0587		9.57833	3.02	1.18109
30252	18.65	0.3031	0.0589		9.61338	3.031	1.18511
30353	18.722	0.3041	0.059		9.65049	3.041	1.18712
30453	18.796	0.305	0.059		9.68864	3.05	1.18712
30554	18.876	0.3061	0.0589		9.72988	3.061	1.18511
30655	18.948	0.3071	0.0591		9.76699	3.071	1.18913
30756	19.022	0.308	0.0592		9.80513	3.08	1.19115
30857	19.092	0.3092	0.0592		9.84122	3.092	1.19115
30958	19.164	0.3102	0.0593		9.87833	3.102	1.19316
31059	19.238	0.3111	0.0593		9.91647	3.111	1.19316
31159	19.31	0.3122	0.0594		9.95359	3.122	1.19517
31260	19.382	0.313	0.0594		9.9907	3.13	1.19517
31361	19.458	0.314	0.0595		10.0299	3.14	1.19718
31462	19.528	0.3152	0.0595		10.066	3.152	1.19718
31563	19.602	0.3161	0.0596		10.1041	3.161	1.1992
31664	19.674	0.3171	0.0596		10.1412	3.171	1.1992
31764	19.748	0.3182	0.0597		10.1794	3.182	1.20121
31865	19.824	0.3191	0.0598		10.2185	3.191	1.20322
31966	19.894	0.3201	0.0597		10.2546	3.201	1.20121
32067	19.966	0.3212	0.0599		10.2917	3.212	1.20523
32168	20.04	0.322	0.0599		10.3299	3.22	1.20523
32269	20.112	0.3231	0.06		10.367	3.231	1.20724
32369	20.19	0.3242	0.0601		10.4072	3.242	1.20926
32470	20.262	0.3252	0.0601		10.4443	3.252	1.20926
32571	20.338	0.3263	0.0602		10.4835	3.263	1.21127
32672	20.406	0.3272	0.0603		10.5185	3.272	1.21328
32773	20.478	0.3282	0.0602		10.5556	3.282	1.21127
32874	20.56	0.3292	0.0604		10.5979	3.292	1.21529
32974	20.638	0.3302	0.0604		10.6381	3.302	1.21529
33075	20.718	0.3312	0.0604		10.6794	3.312	1.21529
33176	20.798	0.3324	0.0605		10.7206	3.324	1.2173
33277	20.872	0.3334	0.0605		10.7587	3.334	1.2173
33378	20.944	0.3345	0.0606		10.7959	3.345	1.21932
33479	21.018	0.3354	0.0606		10.834	3.354	1.21932
33579	21.092	0.3364	0.0608		10.8721	3.364	1.22334
33680	21.16	0.3375	0.0607		10.9072	3.375	1.22133
33781	21.238	0.3383	0.0608		10.9474	3.383	1.22334
33882	21.31	0.3394	0.0608		10.9845	3.394	1.22334
33983	21.382	0.3403	0.0609		11.0216	3.403	1.22535
34084	21.456	0.3413	0.0609		11.0598	3.413	1.22535
34185	21.53	0.3423	0.0611		11.0979	3.423	1.22938
34285	21.604	0.3433	0.0611		11.1361	3.433	1.22938
34386	21.684	0.3444	0.0611		11.1773	3.444	1.22938
34487	21.76	0.3455	0.0612		11.2165	3.455	1.23139
34588	21.834	0.3464	0.0612		11.2546	3.464	1.23139
34689	21.904	0.3473	0.0612		11.2907	3.473	1.23139
34790	21.98	0.3485	0.0613		11.3299	3.485	1.2334
34890	22.058	0.3494	0.0614		11.3701	3.494	1.23541
34991	22.136	0.3505	0.0615		11.4103	3.505	1.23742
35092	22.212	0.3516	0.0615		11.4495	3.516	1.23742
35193	22.288	0.3526	0.0616		11.4886	3.526	1.23944
35294	22.364	0.3538	0.0616		11.5278	3.538	1.23944
35395	22.438	0.3547	0.0617		11.566	3.547	1.24145
35495	22.506	0.3556	0.0618		11.601	3.556	1.24346
35596	22.578	0.3567	0.0618		11.6381	3.567	1.24346
35697	22.65	0.3576	0.0618		11.6752	3.576	1.24346
35798	22.726	0.3586	0.0618		11.7144	3.586	1.24346
35899	22.8	0.3596	0.0619		11.7526	3.596	1.24547
36000	22.872	0.3606	0.062		11.7897	3.606	1.24748
36101	22.948	0.3616	0.0621		11.8288	3.616	1.2495
36201	23.018	0.3626	0.0619		11.8649	3.626	1.24547
36302	23.09	0.3636	0.0621		11.902	3.636	1.2495
36403	23.162	0.3645	0.0622		11.9391	3.645	1.25151
36504	23.24	0.3655	0.0623		11.9794	3.655	1.25352
36605	23.318	0.3665	0.0622		12.0196	3.665	1.25151
36706	23.394	0.3675	0.0624		12.0587	3.675	1.25553
36806	23.47	0.3686	0.0624		12.0979	3.686	1.25553
36907	23.546	0.3697	0.0624		12.1371	3.697	1.25553
37008	23.622	0.3706	0.0624		12.1763	3.706	1.25553
37109	23.698	0.3715	0.0625		12.2154	3.715	1.25755
37210	23.772	0.3724	0.0625		12.2536	3.724	1.25755
37311	23.848	0.3734	0.0626		12.2928	3.734	1.25956
37411	23.922	0.3744	0.0627		12.3309	3.744	1.26157
37512	24	0.3755	0.0627		12.3711	3.755	1.26157
37613	24.076	0.3766	0.0626		12.4103	3.766	1.25956
37714	24.154	0.3777	0.0628		12.4505	3.777	1.26358
37815	24.23	0.3786	0.0627		12.4897	3.786	1.26157
37916	24.302	0.3794	0.0628		12.5268	3.794	1.26358
38016	24.38	0.3805	0.0628		12.567	3.805	1.26358
38117	24.474	0.3817	0.0628		12.6154	3.817	1.26358
38218	24.578	0.3829	0.063		12.669	3.829	1.26761
38319	24.67	0.3841	0.063		12.7165	3.841	1.26761
38420	24.756	0.3853	0.0631		12.7608	3.853	1.26962
38521	24.836	0.3863	0.063		12.802	3.863	1.26761
38622	24.912	0.3874	0.0632		12.8412	3.874	1.27163
38722	24.976	0.3883	0.0631		12.8742	3.883	1.26962
38823	25.028	0.389	0.0632		12.901	3.89	1.27163
38924	25.08	0.39	0.0633		12.9278	3.9	1.27364
39025	25.142	0.3907	0.0634		12.9598	3.907	1.27565
39126	25.212	0.3917	0.0634		12.9958	3.917	1.27565
39227	25.282	0.3926	0.0634		13.0319	3.926	1.27565
39327	25.372	0.3937	0.0634		13.0783	3.937	1.27565
39428	25.464	0.3948	0.0635		13.1257	3.948	1.27767
39529	25.548	0.396	0.0636		13.169	3.96	1.27968
39630	25.63	0.3969	0.0635		13.2113	3.969	1.27767
39731	25.712	0.3979	0.0636		13.2536	3.979	1.27968
39832	25.79	0.3991	0.0637		13.2938	3.991	1.28169
39932	25.866	0.3999	0.0636		13.333	3.999	1.27968
40033	25.942	0.4011	0.0638		13.3721	4.011	1.2837
40134	26.012	0.4021	0.0638		13.4082	4.021	1.2837
40235	26.088	0.403	0.0638		13.4474	4.03	1.2837
40336	26.162	0.404	0.0639		13.4855	4.04	1.28571
40437	26.24	0.405	0.064		13.5257	4.05	1.28773
40537	26.314	0.4059	0.064		13.5639	4.059	1.28773
40638	26.392	0.407	0.064		13.6041	4.07	1.28773
40739	26.468	0.408	0.0642		13.6433	4.08	1.29175
40840	26.542	0.4089	0.0641		13.6814	4.089	1.28974
40941	26.614	0.4099	0.0642		13.7185	4.099	1.29175
41042	26.688	0.411	0.0642		13.7567	4.11	1.29175
41143	26.76	0.4119	0.0643		13.7938	4.119	1.29376
41243	26.838	0.413	0.0643		13.834	4.13	1.29376
41344	26.916	0.4138	0.0643		13.8742	4.138	1.29376
41445	26.992	0.4149	0.0644		13.9134	4.149	1.29577
41546	27.07	0.4158	0.0645		13.9536	4.158	1.29779
41647	27.146	0.4168	0.0645		13.9928	4.168	1.29779
41748	27.222	0.4178	0.0645		14.0319	4.178	1.29779
41848	27.302	0.4189	0.0646		14.0732	4.189	1.2998
41949	27.378	0.42	0.0646		14.1123	4.2	1.2998
42050	27.454	0.421	0.0646		14.1515	4.21	1.2998
42151	27.524	0.4219	0.0647		14.1876	4.219	1.30181
42252	27.598	0.4229	0.0647		14.2257	4.229	1.30181
42353	27.674	0.424	0.0648		14.2649	4.24	1.30382
42453	27.748	0.4247	0.0649		14.3031	4.247	1.30584
42554	27.824	0.4259	0.0649		14.3422	4.259	1.30584
42655	27.9	0.4269	0.065		14.3814	4.269	1.30785
42756	27.976	0.4279	0.065		14.4206	4.279	1.30785
42857	28.05	0.4289	0.0651		14.4587	4.289	1.30986
42958	28.13	0.4297	0.0651		14.5	4.297	1.30986
43059	28.212	0.4308	0.0651		14.5422	4.308	1.30986
43159	28.294	0.4319	0.0652		14.5845	4.319	1.31187
43260	28.376	0.433	0.0652		14.6268	4.33	1.31187
43361	28.458	0.434	0.0653		14.669	4.34	1.31388
43462	28.54	0.435	0.0653		14.7113	4.35	1.31388
43563	28.618	0.4362	0.0654		14.7515	4.362	1.3159
43664	28.7	0.4372	0.0654		14.7938	4.372	1.3159
43764	28.772	0.438	0.0655		14.8309	4.38	1.31791
43865	28.848	0.4389	0.0655		14.8701	4.389	1.31791
43966	28.93	0.44	0.0656		14.9123	4.4	1.31992
44067	29.02	0.4411	0.0656		14.9587	4.411	1.31992
44168	29.112	0.4423	0.0657		15.0062	4.423	1.32193
44269	29.198	0.4433	0.0658		15.0505	4.433	1.32394
44369	29.282	0.4445	0.0658		15.0938	4.445	1.32394
44470	29.354	0.4455	0.0659		15.1309	4.455	1.32596
44571	29.422	0.4464	0.0659		15.1659	4.464	1.32596
44672	29.496	0.4474	0.0659		15.2041	4.474	1.32596
44773	29.566	0.4484	0.066		15.2402	4.484	1.32797
44874	29.642	0.4494	0.0661		15.2793	4.494	1.32998
44974	29.716	0.4504	0.0662		15.3175	4.504	1.33199
45075	29.792	0.4514	0.0663		15.3567	4.514	1.334
45176	29.868	0.4524	0.0663		15.3958	4.524	1.334
45277	29.938	0.4534	0.0664		15.4319	4.534	1.33602
45378	30.012	0.4543	0.0664		15.4701	4.543	1.33602
45479	30.092	0.4553	0.0664		15.5113	4.553	1.33602
45579	30.168	0.4562	0.0665		15.5505	4.562	1.33803
45680	30.242	0.4571	0.0665		15.5886	4.571	1.33803
45781	30.314	0.4581	0.0665		15.6257	4.581	1.33803
45882	30.39	0.4591	0.0667		15.6649	4.591	1.34205
45983	30.466	0.4601	0.0666		15.7041	4.601	1.34004
46084	30.544	0.4612	0.0667		15.7443	4.612	1.34205
46185	30.622	0.4621	0.0669		15.7845	4.621	1.34608
46285	30.702	0.463	0.0669		15.8257	4.63	1.34608
46386	30.784	0.4641	0.067		15.868	4.641	1.34809
46487	30.86	0.4651	0.0671		15.9072	4.651	1.3501
46588	30.94	0.466	0.067		15.9484	4.66	1.34809
46689	31.026	0.4672	0.0671		15.9927	4.672	1.3501
46790	31.114	0.4683	0.0672		16.0381	4.683	1.35211
46890	31.202	0.4694	0.0672		16.0835	4.694	1.35211
46991	31.288	0.4704	0.0673		16.1278	4.704	1.35412
47092	31.37	0.4714	0.0673		16.1701	4.714	1.35412
47193	31.454	0.4725	0.0674		16.2134	4.725	1.35614
47294	31.532	0.4736	0.0674		16.2536	4.736	1.35614
47395	31.612	0.4745	0.0675		16.2948	4.745	1.35815
47495	31.692	0.4756	0.0675		16.336	4.756	1.35815
47596	31.762	0.4766	0.0676		16.3721	4.766	1.36016
47697	31.826	0.4776	0.0677		16.4051	4.776	1.36217
47798	31.894	0.4784	0.0677		16.4402	4.784	1.36217
47899	31.966	0.4793	0.0678		16.4773	4.793	1.36419
48000	32.038	0.4802	0.0678		16.5144	4.802	1.36419
48101	32.114	0.4812	0.0677		16.5536	4.812	1.36217
48201	32.194	0.4822	0.0679		16.5948	4.822	1.3662
48302	32.276	0.4832	0.0679		16.6371	4.832	1.3662
48403	32.354	0.4842	0.0678		16.6773	4.842	1.36419
48504	32.438	0.4852	0.0679		16.7206	4.852	1.3662
48605	32.518	0.4861	0.068		16.7618	4.861	1.36821
48706	32.6	0.4873	0.0681		16.8041	4.873	1.37022
48806	32.682	0.4882	0.0681		16.8464	4.882	1.37022
48907	32.762	0.4894	0.0681		16.8876	4.894	1.37022
49008	32.838	0.4904	0.0682		16.9268	4.904	1.37223
49109	32.916	0.4915	0.0684		16.967	4.915	1.37626
49210	32.99	0.4925	0.0683		17.0051	4.925	1.37425
49311	33.068	0.4934	0.0684		17.0453	4.934	1.37626
49411	33.144	0.4943	0.0684		17.0845	4.943	1.37626
49512	33.222	0.4953	0.0685		17.1247	4.953	1.37827
49613	33.31	0.4963	0.0685		17.1701	4.963	1.37827
49714	33.396	0.4974	0.0685		17.2144	4.974	1.37827
49815	33.476	0.4985	0.0686		17.2556	4.985	1.38028
49916	33.556	0.4995	0.0687		17.2969	4.995	1.38229
50016	33.638	0.5005	0.0687		17.3391	5.005	1.38229
50117	33.718	0.5015	0.0688		17.3804	5.015	1.38431
50218	33.798	0.5024	0.0689		17.4216	5.024	1.38632
50319	33.88	0.5036	0.0689		17.4639	5.036	1.38632
50420	33.958	0.5045	0.0689		17.5041	5.045	1.38632
50521	34.036	0.5055	0.069		17.5443	5.055	1.38833
50622	34.118	0.5066	0.069		17.5866	5.066	1.38833
50722	34.196	0.5074	0.069		17.6268	5.074	1.38833
50823	34.27	0.5085	0.0691		17.6649	5.085	1.39034
50924	34.348	0.5096	0.0691		17.7051	5.096	1.39034
51025	34.428	0.5104	0.0692		17.7464	5.104	1.39235
51126	34.506	0.5114	0.0693		17.7866	5.114	1.39437
51227	34.582	0.5125	0.0694		17.8257	5.125	1.39638
51327	34.654	0.5134	0.0693		17.8628	5.134	1.39437
51428	34.74	0.5144	0.0694		17.9072	5.144	1.39638
51529	34.814	0.5153	0.0695		17.9453	5.153	1.39839
51630	34.892	0.5166	0.0695		17.9855	5.166	1.39839
51731	34.962	0.5174	0.0696		18.0216	5.174	1.4004
51832	35.046	0.5183	0.0696		18.0649	5.183	1.4004
51932	35.124	0.5193	0.0697		18.1051	5.193	1.40241
52033	35.204	0.5203	0.0697		18.1464	5.203	1.40241
52134	35.286	0.5213	0.0698		18.1886	5.213	1.40443
52235	35.366	0.5223	0.0698		18.2299	5.223	1.40443
52336	35.456	0.5234	0.0699		18.2762	5.234	1.40644
52437	35.542	0.5246	0.0699		18.3206	5.246	1.40644
52537	35.624	0.5255	0.07		18.3628	5.255	1.40845
52638	35.714	0.5266	0.0701		18.4092	5.266	1.41046
52739	35.794	0.5275	0.07		18.4505	5.275	1.40845
52840	35.878	0.5287	0.07		18.4938	5.287	1.40845
52941	35.96	0.5297	0.0702		18.536	5.297	1.41247
53042	36.038	0.5307	0.0702		18.5762	5.307	1.41247
53143	36.12	0.5317	0.0703		18.6185	5.317	1.41449
53243	36.202	0.5328	0.0703		18.6608	5.328	1.41449
53344	36.282	0.5337	0.0704		18.702	5.337	1.4165
53445	36.362	0.5347	0.0704		18.7433	5.347	1.4165
53546	36.442	0.5358	0.0704		18.7845	5.358	1.4165
53647	36.518	0.5368	0.0705		18.8237	5.368	1.41851
53748	36.594	0.5377	0.0706		18.8628	5.377	1.42052
53848	36.672	0.5387	0.0706		18.9031	5.387	1.42052
53949	36.746	0.5397	0.0706		18.9412	5.397	1.42052
54050	36.826	0.5407	0.0707		18.9824	5.407	1.42254
54151	36.9	0.5415	0.0707		19.0206	5.415	1.42254
54252	36.98	0.5427	0.0708		19.0618	5.427	1.42455
54353	37.06	0.5435	0.0708		19.1031	5.435	1.42455
54453	37.14	0.5447	0.0709		19.1443	5.447	1.42656
54554	37.226	0.5457	0.0709		19.1886	5.457	1.42656
54655	37.306	0.5467	0.071		19.2299	5.467	1.42857
54756	37.384	0.5478	0.071		19.2701	5.478	1.42857
54857	37.458	0.5487	0.071		19.3082	5.487	1.42857
54958	37.538	0.5496	0.0712		19.3494	5.496	1.4326
55059	37.616	0.5505	0.0712		19.3896	5.505	1.4326
55159	37.69	0.5516	0.0713		19.4278	5.516	1.43461
55260	37.77	0.5526	0.0713		19.469	5.526	1.43461
55361	37.846	0.5538	0.0713		19.5082	5.538	1.43461
55462	37.928	0.5547	0.0714		19.5505	5.547	1.43662
55563	38.014	0.5557	0.0714		19.5948	5.557	1.43662
55664	38.094	0.5568	0.0715		19.636	5.568	1.43863
55764	38.178	0.5578	0.0715		19.6793	5.578	1.43863
55865	38.262	0.5587	0.0716		19.7226	5.587	1.44064
55966	38.344	0.5598	0.0717		19.7649	5.598	1.44266
56067	38.422	0.5608	0.0717		19.8051	5.608	1.44266
56168	38.498	0.5618	0.0718		19.8443	5.618	1.44467
56269	38.574	0.5627	0.0718		19.8835	5.627	1.44467
56369	38.654	0.5638	0.0719		19.9247	5.638	1.44668
56470	38.738	0.5648	0.0719		19.968	5.648	1.44668
56571	38.818	0.5658	0.072		20.0092	5.658	1.44869
56672	38.906	0.5668	0.0719		20.0546	5.668	1.44668
56773	38.994	0.5679	0.072		20.1	5.679	1.44869
56874	39.086	0.569	0.0721		20.1474	5.69	1.4507
56974	39.17	0.5701	0.0721		20.1907	5.701	1.4507
57075	39.252	0.5712	0.0722		20.2329	5.712	1.45272
57176	39.334	0.5721	0.0723		20.2752	5.721	1.45473
57277	39.418	0.5731	0.0724		20.3185	5.731	1.45674
57378	39.498	0.5741	0.0725		20.3598	5.741	1.45875
57479	39.576	0.5752	0.0724		20.4	5.752	1.45674
57579	39.654	0.5762	0.0725		20.4402	5.762	1.45875
57680	39.732	0.5772	0.0726		20.4804	5.772	1.46076
57781	39.81	0.5782	0.0726		20.5206	5.782	1.46076
57882	39.888	0.5791	0.0727		20.5608	5.791	1.46278
57983	39.966	0.5801	0.0727		20.601	5.801	1.46278
58084	40.044	0.581	0.0728		20.6412	5.81	1.46479
58185	40.126	0.5821	0.0729		20.6835	5.821	1.4668
58285	40.202	0.5831	0.0729		20.7226	5.831	1.4668
58386	40.284	0.5841	0.073		20.7649	5.841	1.46881
58487	40.362	0.5851	0.073		20.8051	5.851	1.46881
58588	40.444	0.5862	0.0731		20.8474	5.862	1.47082
58689	40.518	0.5871	0.0731		20.8855	5.871	1.47082
58790	40.602	0.5881	0.0731		20.9288	5.881	1.47082
58890	40.682	0.589	0.0732		20.9701	5.89	1.47284
58991	40.762	0.59	0.0732		21.0113	5.9	1.47284
59092	40.842	0.5911	0.0733		21.0525	5.911	1.47485
59193	40.918	0.592	0.0734		21.0917	5.92	1.47686
59294	40.998	0.593	0.0734		21.1329	5.93	1.47686
59395	41.072	0.5941	0.0734		21.1711	5.941	1.47686
59495	41.148	0.595	0.0736		21.2103	5.95	1.48089
59596	41.226	0.596	0.0735		21.2505	5.96	1.47887
59697	41.304	0.5969	0.0736		21.2907	5.969	1.48089
59798	41.39	0.5979	0.0736		21.335	5.979	1.48089
59899	41.476	0.599	0.0738		21.3793	5.99	1.48491
60000	41.554	0.6	0.0739		21.4195	6	1.48692
60101	41.64	0.6009	0.0739		21.4639	6.009	1.48692
60201	41.72	0.602	0.074		21.5051	6.02	1.48893
60302	41.798	0.603	0.074		21.5453	6.03	1.48893
60403	41.876	0.604	0.074		21.5855	6.04	1.48893
60504	41.958	0.605	0.0741		21.6278	6.05	1.49095
60605	42.032	0.606	0.0741		21.6659	6.06	1.49095
60706	42.116	0.6069	0.0742		21.7092	6.069	1.49296
60806	42.204	0.608	0.0743		21.7546	6.08	1.49497
60907	42.294	0.6091	0.0743		21.801	6.091	1.49497
61008	42.384	0.6101	0.0745		21.8474	6.101	1.49899
61109	42.48	0.6113	0.0745		21.8969	6.113	1.49899
61210	42.568	0.6123	0.0745		21.9422	6.123	1.49899
61311	42.654	0.6133	0.0746		21.9866	6.133	1.50101
61411	42.736	0.6145	0.0746		22.0288	6.145	1.50101
61512	42.816	0.6155	0.0747		22.0701	6.155	1.50302
61613	42.894	0.6165	0.0748		22.1103	6.165	1.50503
61714	42.972	0.6175	0.0748		22.1505	6.175	1.50503
61815	43.052	0.6185	0.0749		22.1917	6.185	1.50704
61916	43.13	0.6194	0.075		22.2319	6.194	1.50905
62016	43.208	0.6206	0.0751		22.2721	6.206	1.51107
62117	43.286	0.6214	0.0751		22.3123	6.214	1.51107
62218	43.354	0.6223	0.0752		22.3474	6.223	1.51308
62319	43.428	0.6233	0.0752		22.3855	6.233	1.51308
62420	43.5	0.6243	0.0752		22.4226	6.243	1.51308
62521	43.574	0.6253	0.0754		22.4608	6.253	1.5171
62622	43.652	0.6263	0.0755		22.501	6.263	1.51911
62722	43.732	0.6271	0.0754		22.5422	6.271	1.5171
62823	43.812	0.6281	0.0754		22.5835	6.281	1.5171
62924	43.888	0.629	0.0755		22.6226	6.29	1.51911
63025	43.968	0.6301	0.0756		22.6639	6.301	1.52113
63126	44.07	0.6314	0.0757		22.7164	6.314	1.52314
63227	44.168	0.6326	0.0758		22.767	6.326	1.52515
63327	44.262	0.6336	0.0759		22.8154	6.336	1.52716
63428	44.354	0.6347	0.0759		22.8628	6.347	1.52716
63529	44.438	0.6357	0.0759		22.9061	6.357	1.52716
63630	44.524	0.6368	0.076		22.9505	6.368	1.52918
63731	44.598	0.6378	0.0762		22.9886	6.378	1.5332
63832	44.68	0.639	0.0762		23.0309	6.39	1.5332
63932	44.754	0.6399	0.0763		23.069	6.399	1.53521
64033	44.826	0.6408	0.0763		23.1061	6.408	1.53521
64134	44.904	0.6419	0.0764		23.1463	6.419	1.53722
64235	44.98	0.6428	0.0765		23.1855	6.428	1.53924
64336	45.056	0.6438	0.0766		23.2247	6.438	1.54125
64437	45.13	0.6448	0.0765		23.2628	6.448	1.53924
64537	45.208	0.6455	0.0767		23.303	6.455	1.54326
64638	45.28	0.6467	0.0768		23.3402	6.467	1.54527
64739	45.354	0.6476	0.0769		23.3783	6.476	1.54728
64840	45.43	0.6485	0.0769		23.4175	6.485	1.54728
64941	45.504	0.6496	0.077		23.4556	6.496	1.5493
65042	45.584	0.6505	0.0771		23.4969	6.505	1.55131
65143	45.668	0.6515	0.0771		23.5402	6.515	1.55131
65243	45.748	0.6524	0.0771		23.5814	6.524	1.55131
65344	45.826	0.6534	0.0772		23.6216	6.534	1.55332
65445	45.904	0.6544	0.0773		23.6618	6.544	1.55533
65546	45.986	0.6554	0.0773		23.7041	6.554	1.55533
65647	46.07	0.6563	0.0774		23.7474	6.563	1.55734
65748	46.152	0.6573	0.0775		23.7896	6.573	1.55936
65848	46.232	0.6584	0.0775		23.8309	6.584	1.55936
65949	46.316	0.6593	0.0775		23.8742	6.593	1.55936
66050	46.402	0.6603	0.0777		23.9185	6.603	1.56338
66151	46.484	0.6613	0.0777		23.9608	6.613	1.56338
66252	46.57	0.6625	0.0777		24.0051	6.625	1.56338
66353	46.652	0.6634	0.0778		24.0474	6.634	1.56539
66453	46.732	0.6643	0.078		24.0886	6.643	1.56942
66554	46.812	0.6654	0.078		24.1298	6.654	1.56942
66655	46.89	0.6663	0.078		24.1701	6.663	1.56942
66756	46.978	0.6673	0.0781		24.2154	6.673	1.57143
66857	47.054	0.6685	0.0782		24.2546	6.685	1.57344
66958	47.14	0.6695	0.0783		24.2989	6.695	1.57545
67059	47.216	0.6704	0.0783		24.3381	6.704	1.57545
67159	47.294	0.6714	0.0784		24.3783	6.714	1.57746
67260	47.37	0.6725	0.0785		24.4175	6.725	1.57948
67361	47.45	0.6733	0.0785		24.4587	6.733	1.57948
67462	47.534	0.6742	0.0786		24.502	6.742	1.58149
67563	47.62	0.6753	0.0786		24.5463	6.753	1.58149
67664	47.71	0.6764	0.0787		24.5927	6.764	1.5835
67764	47.792	0.6774	0.0789		24.635	6.774	1.58753
67865	47.874	0.6784	0.0789		24.6773	6.784	1.58753
67966	47.956	0.6794	0.079		24.7195	6.794	1.58954
68067	48.036	0.6804	0.079		24.7608	6.804	1.58954
68168	48.118	0.6814	0.0791		24.803	6.814	1.59155
68269	48.206	0.6825	0.0792		24.8484	6.825	1.59356
68369	48.296	0.6834	0.0793		24.8948	6.834	1.59557
68470	48.4	0.6846	0.0793		24.9484	6.846	1.59557
68571	48.5	0.6858	0.0794		24.9999	6.858	1.59759
68672	48.598	0.6871	0.0795		25.0505	6.871	1.5996
68773	48.684	0.6882	0.0795		25.0948	6.882	1.5996
68874	48.764	0.6891	0.0797		25.136	6.891	1.60362
68974	48.844	0.6901	0.0797		25.1773	6.901	1.60362
69075	48.922	0.6911	0.0798		25.2175	6.911	1.60563
69176	48.998	0.6919	0.0799		25.2566	6.919	1.60765
69277	49.074	0.6931	0.08		25.2958	6.931	1.60966
69378	49.156	0.694	0.0801		25.3381	6.94	1.61167
69479	49.234	0.6951	0.0801		25.3783	6.951	1.61167
69579	49.31	0.6959	0.0802		25.4175	6.959	1.61368
69680	49.392	0.6969	0.0803		25.4597	6.969	1.61569
69781	49.474	0.6978	0.0804		25.502	6.978	1.61771
69882	49.554	0.6989	0.0804		25.5432	6.989	1.61771
69983	49.638	0.6998	0.0806		25.5865	6.998	1.62173
70084	49.72	0.7009	0.0806		25.6288	7.009	1.62173
70185	49.8	0.702	0.0807		25.67	7.02	1.62374
70285	49.874	0.7029	0.0807		25.7082	7.029	1.62374
70386	49.958	0.7039	0.0808		25.7515	7.039	1.62575
70487	50.036	0.7049	0.081		25.7917	7.049	1.62978
70588	50.118	0.7058	0.081		25.834	7.058	1.62978
70689	50.196	0.7068	0.0811		25.8742	7.068	1.63179
70790	50.282	0.7077	0.0812		25.9185	7.077	1.6338
70890	50.36	0.7088	0.0813		25.9587	7.088	1.63581
70991	50.442	0.7099	0.0814		26.001	7.099	1.63783
71092	50.524	0.7108	0.0814		26.0432	7.108	1.63783
71193	50.6	0.7118	0.0815		26.0824	7.118	1.63984
71294	50.684	0.7127	0.0815		26.1257	7.127	1.63984
71395	50.766	0.7138	0.0816		26.168	7.138	1.64185
71495	50.844	0.7147	0.0817		26.2082	7.147	1.64386
71596	50.93	0.7158	0.0818		26.2525	7.158	1.64588
71697	51.012	0.7168	0.0819		26.2948	7.168	1.64789
71798	51.092	0.7179	0.082		26.336	7.179	1.6499
71899	51.17	0.7188	0.0821		26.3762	7.188	1.65191
72000	51.248	0.7198	0.0821		26.4164	7.198	1.65191
72101	51.326	0.7206	0.0822		26.4566	7.206	1.65392
72201	51.41	0.7215	0.0823		26.4999	7.215	1.65594
72302	51.496	0.7228	0.0824		26.5443	7.228	1.65795
72403	51.58	0.7237	0.0825		26.5876	7.237	1.65996
72504	51.672	0.7248	0.0825		26.635	7.248	1.65996
72605	51.756	0.7259	0.0826		26.6783	7.259	1.66197
72706	51.84	0.7268	0.0826		26.7216	7.268	1.66197
72806	51.922	0.7278	0.0828		26.7639	7.278	1.666
72907	52.008	0.7288	0.0828		26.8082	7.288	1.666
73008	52.09	0.7298	0.0829		26.8505	7.298	1.66801
73109	52.178	0.7308	0.083		26.8958	7.308	1.67002
73210	52.254	0.732	0.0831		26.935	7.32	1.67203
73311	52.332	0.7328	0.0831		26.9752	7.328	1.67203
73411	52.416	0.7338	0.0833		27.0185	7.338	1.67606
73512	52.494	0.7349	0.0833		27.0587	7.349	1.67606
73613	52.576	0.7357	0.0834		27.101	7.357	1.67807
73714	52.656	0.7367	0.0835		27.1422	7.367	1.68008
73815	52.74	0.7378	0.0836		27.1855	7.378	1.68209
73916	52.824	0.7387	0.0836		27.2288	7.387	1.68209
74016	52.904	0.7398	0.0838		27.27	7.398	1.68612
74117	52.982	0.7408	0.0839		27.3103	7.408	1.68813
74218	53.058	0.742	0.084		27.3494	7.42	1.69014
74319	53.14	0.7427	0.084		27.3917	7.427	1.69014
74420	53.228	0.7438	0.0841		27.4371	7.438	1.69215
74521	53.32	0.7448	0.0842		27.4845	7.448	1.69416
74622	53.41	0.7459	0.0843		27.5309	7.459	1.69618
74722	53.498	0.747	0.0844		27.5762	7.47	1.69819
74823	53.58	0.748	0.0845		27.6185	7.48	1.7002
74924	53.668	0.7492	0.0847		27.6639	7.492	1.70423
75025	53.754	0.7501	0.0847		27.7082	7.501	1.70423
75126	53.83	0.7511	0.0847		27.7474	7.511	1.70423
75227	53.91	0.7521	0.0848		27.7886	7.521	1.70624
75327	53.99	0.7531	0.085		27.8298	7.531	1.71026
75428	54.07	0.7542	0.085		27.8711	7.542	1.71026
75529	54.148	0.755	0.085		27.9113	7.55	1.71026
75630	54.228	0.7561	0.0852		27.9525	7.561	1.71429
75731	54.302	0.7572	0.0853		27.9907	7.572	1.7163
75832	54.372	0.7582	0.0853		28.0267	7.582	1.7163
75932	54.45	0.759	0.0854		28.067	7.59	1.71831
76033	54.53	0.7601	0.0855		28.1082	7.601	1.72032
76134	54.61	0.7611	0.0856		28.1494	7.611	1.72233
76235	54.692	0.762	0.0857		28.1917	7.62	1.72435
76336	54.77	0.7629	0.0858		28.2319	7.629	1.72636
76437	54.848	0.7639	0.0858		28.2721	7.639	1.72636
76537	54.926	0.765	0.0859		28.3123	7.65	1.72837
76638	55.008	0.766	0.0861		28.3546	7.66	1.73239
76739	55.092	0.7669	0.0861		28.3979	7.669	1.73239
76840	55.176	0.768	0.0862		28.4412	7.68	1.73441
76941	55.26	0.769	0.0863		28.4845	7.69	1.73642
77042	55.342	0.77	0.0864		28.5267	7.7	1.73843
77143	55.426	0.771	0.0865		28.57	7.71	1.74044
77243	55.51	0.772	0.0865		28.6133	7.72	1.74044
77344	55.588	0.7731	0.0867		28.6535	7.731	1.74447
77445	55.668	0.774	0.0867		28.6948	7.74	1.74447
77546	55.754	0.775	0.0869		28.7391	7.75	1.74849
77647	55.846	0.7761	0.0869		28.7865	7.761	1.74849
77748	55.924	0.7772	0.087		28.8267	7.772	1.7505
77848	56.004	0.7782	0.0871		28.868	7.782	1.75252
77949	56.088	0.7793	0.0872		28.9113	7.793	1.75453
78050	56.164	0.7803	0.0874		28.9505	7.803	1.75855
78151	56.244	0.7812	0.0874		28.9917	7.812	1.75855
78252	56.33	0.7823	0.0874		29.036	7.823	1.75855
78353	56.412	0.7834	0.0875		29.0783	7.834	1.76056
78453	56.492	0.7844	0.0877		29.1195	7.844	1.76459
78554	56.576	0.7853	0.0878		29.1628	7.853	1.7666
78655	56.652	0.7864	0.0879		29.202	7.864	1.76861
78756	56.734	0.7873	0.0879		29.2443	7.873	1.76861
78857	56.812	0.7884	0.0881		29.2845	7.884	1.77264
78958	56.888	0.7894	0.0881		29.3236	7.894	1.77264
79059	56.97	0.7903	0.0882		29.3659	7.903	1.77465
79159	57.044	0.7913	0.0883		29.4041	7.913	1.77666
79260	57.118	0.7923	0.0883		29.4422	7.923	1.77666
79361	57.194	0.7933	0.0884		29.4814	7.933	1.77867
79462	57.272	0.7943	0.0885		29.5216	7.943	1.78068
79563	57.35	0.7951	0.0887		29.5618	7.951	1.78471
79664	57.434	0.7963	0.0887		29.6051	7.963	1.78471
79764	57.51	0.7972	0.0888		29.6443	7.972	1.78672
79865	57.59	0.7982	0.0889		29.6855	7.982	1.78873
79966	57.67	0.7992	0.089		29.7267	7.992	1.79074
80067	57.744	0.8001	0.089		29.7649	8.001	1.79074
80168	57.826	0.8011	0.0892		29.8072	8.011	1.79477
80269	57.908	0.8023	0.0892		29.8494	8.023	1.79477
80369	57.992	0.8033	0.0893		29.8927	8.033	1.79678
80470	58.08	0.8044	0.0893		29.9381	8.044	1.79678
80571	58.16	0.8053	0.0896		29.9793	8.053	1.80282
80672	58.258	0.8063	0.0896		30.0298	8.063	1.80282
80773	58.346	0.8076	0.0898		30.0752	8.076	1.80684
80874	58.436	0.8086	0.0899		30.1216	8.086	1.80885
80974	58.524	0.8097	0.09		30.1669	8.097	1.81087
81075	58.606	0.8107	0.0901		30.2092	8.107	1.81288
81176	58.686	0.8118	0.0902		30.2505	8.118	1.81489
81277	58.764	0.8127	0.0902		30.2907	8.127	1.81489
81378	58.846	0.8137	0.0904		30.3329	8.137	1.81891
81479	58.924	0.8148	0.0905		30.3731	8.148	1.82093
81579	59.002	0.8157	0.0905		30.4133	8.157	1.82093
81680	59.084	0.8168	0.0907		30.4556	8.168	1.82495
81781	59.156	0.8178	0.0907		30.4927	8.178	1.82495
81882	59.23	0.8188	0.0909		30.5309	8.188	1.82897
81983	59.302	0.8197	0.091		30.568	8.197	1.83099
82084	59.376	0.8206	0.091		30.6061	8.206	1.83099
82185	59.448	0.8216	0.0912		30.6432	8.216	1.83501
82285	59.522	0.8226	0.0912		30.6814	8.226	1.83501
82386	59.598	0.8236	0.0915		30.7206	8.236	1.84105
82487	59.676	0.8246	0.0915		30.7608	8.246	1.84105
82588	59.748	0.8256	0.0915		30.7979	8.256	1.84105
82689	59.826	0.8266	0.0916		30.8381	8.266	1.84306
82790	59.9	0.8276	0.0917		30.8762	8.276	1.84507
82890	59.978	0.8286	0.0918		30.9164	8.286	1.84708
82991	60.056	0.8295	0.0919		30.9566	8.295	1.84909
83092	60.138	0.8305	0.092		30.9989	8.305	1.85111
83193	60.22	0.8315	0.0921		31.0412	8.315	1.85312
83294	60.3	0.8326	0.0923		31.0824	8.326	1.85714
83395	60.378	0.8335	0.0923		31.1226	8.335	1.85714
83495	60.454	0.8344	0.0925		31.1618	8.344	1.86117
83596	60.54	0.8357	0.0925		31.2061	8.357	1.86117
83697	60.622	0.8366	0.0926		31.2484	8.366	1.86318
83798	60.708	0.8376	0.0927		31.2927	8.376	1.86519
83899	60.79	0.8387	0.0928		31.335	8.387	1.8672
84000	60.868	0.8396	0.0929		31.3752	8.396	1.86922
84101	60.94	0.8406	0.093		31.4123	8.406	1.87123
84201	61.02	0.8418	0.0932		31.4535	8.418	1.87525
84302	61.096	0.8426	0.0933		31.4927	8.426	1.87726
84403	61.176	0.8436	0.0934		31.534	8.436	1.87928
84504	61.246	0.8446	0.0935		31.57	8.446	1.88129
84605	61.322	0.8456	0.0937		31.6092	8.456	1.88531
84706	61.4	0.8467	0.0938		31.6494	8.467	1.88732
84806	61.478	0.8475	0.0938		31.6896	8.475	1.88732
84907	61.552	0.8485	0.094		31.7278	8.485	1.89135
85008	61.632	0.8496	0.094		31.769	8.496	1.89135
85109	61.708	0.8507	0.0941		31.8082	8.507	1.89336
85210	61.784	0.8517	0.0943		31.8474	8.517	1.89738
85311	61.864	0.8526	0.0943		31.8886	8.526	1.89738
85411	61.938	0.8536	0.0945		31.9267	8.536	1.90141
85512	62.02	0.8546	0.0946		31.969	8.546	1.90342
85613	62.096	0.8556	0.0947		32.0082	8.556	1.90543
85714	62.172	0.8566	0.0948		32.0474	8.566	1.90744
85815	62.25	0.8576	0.0949		32.0876	8.576	1.90946
85916	62.322	0.8586	0.0951		32.1247	8.586	1.91348
86016	62.396	0.8596	0.0952		32.1628	8.596	1.91549
86117	62.47	0.8604	0.0953		32.201	8.604	1.91751
86218	62.55	0.8615	0.0953		32.2422	8.615	1.91751
86319	62.628	0.8626	0.0956		32.2824	8.626	1.92354
86420	62.71	0.8635	0.0956		32.3247	8.635	1.92354
86521	62.788	0.8645	0.0957		32.3649	8.645	1.92555
86622	62.876	0.8658	0.0958		32.4102	8.658	1.92757
86722	62.96	0.8667	0.0959		32.4535	8.667	1.92958
86823	63.044	0.8678	0.096		32.4968	8.678	1.93159
86924	63.12	0.8687	0.0961		32.536	8.687	1.9336
87025	63.202	0.8698	0.0963		32.5783	8.698	1.93763
87126	63.282	0.8708	0.0963		32.6195	8.708	1.93763
87227	63.358	0.8719	0.0964		32.6587	8.719	1.93964
87327	63.432	0.8728	0.0965		32.6968	8.728	1.94165
87428	63.506	0.8738	0.0967		32.735	8.738	1.94567
87529	63.584	0.8749	0.0968		32.7752	8.749	1.94769
87630	63.66	0.8758	0.0969		32.8144	8.758	1.9497
87731	63.736	0.8769	0.097		32.8535	8.769	1.95171
87832	63.812	0.8777	0.0971		32.8927	8.777	1.95372
87932	63.89	0.8789	0.0972		32.9329	8.789	1.95573
88033	63.966	0.8798	0.0973		32.9721	8.798	1.95775
88134	64.04	0.8808	0.0974		33.0102	8.808	1.95976
88235	64.112	0.8818	0.0976		33.0474	8.818	1.96378
88336	64.186	0.8829	0.0976		33.0855	8.829	1.96378
88437	64.26	0.8838	0.0977		33.1236	8.838	1.96579
88537	64.332	0.8849	0.0979		33.1608	8.849	1.96982
88638	64.404	0.8857	0.098		33.1979	8.857	1.97183
88739	64.482	0.8865	0.0981		33.2381	8.865	1.97384
88840	64.558	0.8878	0.0982		33.2772	8.878	1.97586
88941	64.634	0.8888	0.0982		33.3164	8.888	1.97586
89042	64.708	0.8898	0.0984		33.3546	8.898	1.97988
89143	64.786	0.8908	0.0986		33.3948	8.908	1.9839
89243	64.86	0.8919	0.0987		33.4329	8.919	1.98592
89344	64.934	0.8928	0.0987		33.4711	8.928	1.98592
89445	65.012	0.8938	0.0989		33.5113	8.938	1.98994
89546	65.086	0.8947	0.0989		33.5494	8.947	1.98994
89647	65.164	0.8958	0.099		33.5896	8.958	1.99195
89748	65.242	0.8967	0.0992		33.6298	8.967	1.99598
89848	65.324	0.8977	0.0992		33.6721	8.977	1.99598
89949	65.408	0.8988	0.0993		33.7154	8.988	1.99799
90050	65.488	0.8999	0.0995		33.7566	8.999	2.00201
90151	65.572	0.901	0.0997		33.7999	9.01	2.00604
90252	65.652	0.9019	0.0998		33.8412	9.019	2.00805
90353	65.732	0.9029	0.0999		33.8824	9.029	2.01006
90453	65.808	0.904	0.0999		33.9216	9.04	2.01006
90554	65.89	0.905	0.1		33.9638	9.05	2.01207
90655	65.968	0.906	0.1003		34.0041	9.06	2.01811
90756	66.046	0.907	0.1003		34.0443	9.07	2.01811
90857	66.116	0.9082	0.1005		34.0803	9.082	2.02213
90958	66.194	0.909	0.1006		34.1205	9.09	2.02414
91059	66.266	0.9097	0.1007		34.1577	9.097	2.02616
91159	66.352	0.9107	0.1008		34.202	9.107	2.02817
91260	66.448	0.9118	0.1009		34.2515	9.118	2.03018
91361	66.544	0.9131	0.101		34.301	9.131	2.03219
91462	66.636	0.9142	0.1012		34.3484	9.142	2.03622
91563	66.72	0.9154	0.1013		34.3917	9.154	2.03823
91664	66.802	0.9164	0.1014		34.4339	9.164	2.04024
91764	66.878	0.9174	0.1015		34.4731	9.174	2.04225
91865	66.954	0.9183	0.1016		34.5123	9.183	2.04427
91966	67.028	0.9195	0.1018		34.5504	9.195	2.04829
92067	67.102	0.9204	0.1019		34.5886	9.204	2.0503
92168	67.182	0.9215	0.102		34.6298	9.215	2.05231
92269	67.254	0.9225	0.1021		34.6669	9.225	2.05433
92369	67.324	0.9235	0.1023		34.703	9.235	2.05835
92470	67.396	0.9244	0.1024		34.7401	9.244	2.06036
92571	67.468	0.9253	0.1024		34.7772	9.253	2.06036
92672	67.536	0.9263	0.1025		34.8123	9.263	2.06237
92773	67.612	0.9273	0.1027		34.8515	9.273	2.0664
92874	67.682	0.9284	0.1028		34.8876	9.284	2.06841
92974	67.75	0.9292	0.1028		34.9226	9.292	2.06841
93075	67.814	0.9303	0.1029		34.9556	9.303	2.07042
93176	67.886	0.9313	0.1031		34.9927	9.313	2.07445
93277	67.958	0.9324	0.1032		35.0298	9.324	2.07646
93378	68.024	0.9334	0.1033		35.0638	9.334	2.07847
93479	68.096	0.9343	0.1034		35.101	9.343	2.08048
93579	68.17	0.9351	0.1035		35.1391	9.351	2.08249
93680	68.248	0.9361	0.1036		35.1793	9.361	2.08451
93781	68.318	0.9372	0.1037		35.2154	9.372	2.08652
93882	68.394	0.9382	0.1039		35.2546	9.382	2.09054
93983	68.472	0.9393	0.104		35.2948	9.393	2.09256
94084	68.554	0.9404	0.104		35.337	9.404	2.09256
94185	68.632	0.9414	0.104		35.3772	9.414	2.09256
94285	68.706	0.9425	0.1042		35.4154	9.425	2.09658
94386	68.78	0.9434	0.1044		35.4535	9.434	2.1006
94487	68.854	0.9445	0.1045		35.4917	9.445	2.10262
94588	68.92	0.9454	0.1047		35.5257	9.454	2.10664
94689	68.988	0.9466	0.1047		35.5607	9.466	2.10664
94790	69.06	0.9474	0.1048		35.5979	9.474	2.10865
94890	69.13	0.9485	0.1049		35.6339	9.485	2.11066
94991	69.198	0.9494	0.1051		35.669	9.494	2.11469
95092	69.268	0.9505	0.1051		35.7051	9.505	2.11469
95193	69.32	0.9514	0.1051		35.7319	9.514	2.11469
95294	69.384	0.9524	0.1052		35.7649	9.524	2.1167
95395	69.45	0.9533	0.1053		35.7989	9.533	2.11871
95495	69.516	0.9545	0.1055		35.8329	9.545	2.12274
95596	69.582	0.9555	0.1056		35.8669	9.555	2.12475
95697	69.644	0.9564	0.1057		35.8989	9.564	2.12676
95798	69.712	0.9575	0.1058		35.9339	9.575	2.12877
95899	69.78	0.9585	0.106		35.969	9.585	2.1328
96000	69.85	0.9595	0.1061		36.0051	9.595	2.13481
96101	69.916	0.9604	0.1062		36.0391	9.604	2.13682
96201	69.978	0.9613	0.1063		36.0711	9.613	2.13883
96302	70.052	0.9622	0.1064		36.1092	9.622	2.14085
96403	70.124	0.9633	0.1065		36.1463	9.633	2.14286
96504	70.198	0.9643	0.1066		36.1845	9.643	2.14487
96605	70.264	0.9651	0.1068		36.2185	9.651	2.14889
96706	70.338	0.9664	0.107		36.2566	9.664	2.15292
96806	70.416	0.9673	0.107		36.2968	9.673	2.15292
96907	70.488	0.9683	0.1072		36.3339	9.683	2.15694
97008	70.558	0.9693	0.1072		36.37	9.693	2.15694
97109	70.638	0.9703	0.1073		36.4113	9.703	2.15895
97210	70.738	0.9713	0.1075		36.4628	9.713	2.16298
97311	70.83	0.9726	0.1077		36.5102	9.726	2.167
97411	70.912	0.9736	0.1078		36.5525	9.736	2.16901
97512	70.994	0.9748	0.1079		36.5948	9.748	2.17103
97613	71.072	0.976	0.108		36.635	9.76	2.17304
97714	71.15	0.977	0.1081		36.6752	9.77	2.17505
97815	71.222	0.9779	0.1082		36.7123	9.779	2.17706
97916	71.3	0.9789	0.1084		36.7525	9.789	2.18109
98016	71.372	0.98	0.1086		36.7896	9.8	2.18511
98117	71.442	0.981	0.1087		36.8257	9.81	2.18712
98218	71.508	0.9822	0.1087		36.8597	9.822	2.18712
98319	71.574	0.983	0.1089		36.8937	9.83	2.19115
98420	71.638	0.984	0.1091		36.9267	9.84	2.19517
98521	71.704	0.9849	0.1092		36.9607	9.849	2.19718
98622	71.766	0.9859	0.1092		36.9927	9.859	2.19718
98722	71.828	0.9869	0.1093		37.0247	9.869	2.1992
98823	71.89	0.9877	0.1094		37.0566	9.877	2.20121
98924	71.954	0.9888	0.1095		37.0896	9.888	2.20322
99025	72.026	0.9898	0.1097		37.1267	9.898	2.20724
99126	72.094	0.9908	0.1098		37.1618	9.908	2.20926
99227	72.16	0.9918	0.1099		37.1958	9.918	2.21127
99327	72.226	0.9927	0.11		37.2298	9.927	2.21328
99428	72.296	0.9937	0.1102		37.2659	9.937	2.2173
99529	72.36	0.9947	0.1102		37.2989	9.947	2.2173
99630	72.43	0.9956	0.1104		37.335	9.956	2.22133
99731	72.498	0.9967	0.1105		37.37	9.967	2.22334
99832	72.57	0.9977	0.1106		37.4071	9.977	2.22535
99932	72.642	0.9987	0.1108		37.4442	9.987	2.22938
100033	72.718	0.9998	0.1109		37.4834	9.998	2.23139
100134	72.786	1.0007	0.111		37.5185	10.007	2.2334
100235	72.854	1.0017	0.1112		37.5535	10.017	2.23742
100336	72.926	1.0028	0.1113		37.5906	10.028	2.23944
100437	72.994	1.0037	0.1115		37.6257	10.037	2.24346
100537	73.058	1.0047	0.1117		37.6587	10.047	2.24748
100638	73.122	1.0057	0.1118		37.6917	10.057	2.2495
100739	73.192	1.0067	0.1119		37.7278	10.067	2.25151
100840	73.258	1.0076	0.112		37.7618	10.076	2.25352
100941	73.326	1.0086	0.1121		37.7968	10.086	2.25553
101042	73.396	1.0096	0.1122		37.8329	10.096	2.25755
101143	73.464	1.0106	0.1124		37.868	10.106	2.26157
101243	73.53	1.0116	0.1126		37.902	10.116	2.26559
101344	73.6	1.0126	0.1128		37.9381	10.126	2.26962
101445	73.668	1.0136	0.1128		37.9731	10.136	2.26962
101546	73.738	1.0147	0.113		38.0092	10.147	2.27364
101647	73.804	1.0155	0.1131		38.0432	10.155	2.27565
101748	73.878	1.0166	0.1132		38.0814	10.166	2.27767
101848	73.946	1.0176	0.1134		38.1164	10.176	2.28169
101949	74.016	1.0185	0.1135		38.1525	10.185	2.2837
102050	74.086	1.0194	0.1137		38.1886	10.194	2.28773
102151	74.152	1.0205	0.1139		38.2226	10.205	2.29175
102252	74.218	1.0216	0.1139		38.2566	10.216	2.29175
102353	74.29	1.0227	0.1139		38.2937	10.227	2.29175
102453	74.356	1.0236	0.1141		38.3278	10.236	2.29577
102554	74.426	1.0246	0.1142		38.3638	10.246	2.29779
102655	74.514	1.0256	0.1144		38.4092	10.256	2.30181
102756	74.624	1.027	0.1145		38.4659	10.27	2.30382
102857	74.722	1.0283	0.1146		38.5164	10.283	2.30584
102958	74.814	1.0295	0.1149		38.5638	10.295	2.31187
103059	74.888	1.0306	0.115		38.602	10.306	2.31388
103159	74.96	1.0316	0.115		38.6391	10.316	2.31388
103260	75.028	1.0326	0.1152		38.6741	10.326	2.31791
103361	75.1	1.0335	0.1154		38.7113	10.335	2.32193
103462	75.156	1.0346	0.1156		38.7401	10.346	2.32596
103563	75.214	1.0354	0.1157		38.77	10.354	2.32797
103664	75.27	1.0364	0.1158		38.7989	10.364	2.32998
103764	75.326	1.0373	0.1159		38.8278	10.373	2.33199
103865	75.39	1.0382	0.1161		38.8607	10.382	2.33602
103966	75.452	1.0393	0.1162		38.8927	10.393	2.33803
104067	75.51	1.0401	0.1163		38.9226	10.401	2.34004
104168	75.578	1.0412	0.1164		38.9576	10.412	2.34205
104269	75.636	1.042	0.1166		38.9875	10.42	2.34608
104369	75.702	1.0429	0.1167		39.0216	10.429	2.34809
104470	75.768	1.0441	0.1169		39.0556	10.441	2.35211
104571	75.836	1.0451	0.117		39.0906	10.451	2.35412
104672	75.908	1.0461	0.1171		39.1278	10.461	2.35614
104773	75.978	1.0472	0.1173		39.1638	10.472	2.36016
104874	76.048	1.0481	0.1174		39.1999	10.481	2.36217
104974	76.112	1.049	0.1175		39.2329	10.49	2.36419
105075	76.178	1.05	0.1175		39.2669	10.5	2.36419
105176	76.244	1.0511	0.1178		39.3009	10.511	2.37022
105277	76.314	1.0521	0.1179		39.337	10.521	2.37223
105378	76.378	1.053	0.118		39.37	10.53	2.37425
105479	76.442	1.0542	0.1182		39.403	10.542	2.37827
105579	76.504	1.0551	0.1184		39.435	10.551	2.38229
105680	76.57	1.0561	0.1183		39.469	10.561	2.38028
105781	76.634	1.057	0.1186		39.502	10.57	2.38632
105882	76.704	1.0581	0.1187		39.5381	10.581	2.38833
105983	76.77	1.0591	0.1188		39.5721	10.591	2.39034
106084	76.836	1.06	0.119		39.6061	10.6	2.39437
106185	76.898	1.061	0.1191		39.6381	10.61	2.39638
106285	76.958	1.0619	0.1192		39.669	10.619	2.39839
106386	77.028	1.063	0.1194		39.7051	10.63	2.40241
106487	77.094	1.064	0.1195		39.7391	10.64	2.40443
106588	77.16	1.0651	0.1196		39.7731	10.651	2.40644
106689	77.224	1.0659	0.1198		39.8061	10.659	2.41046
106790	77.288	1.067	0.1199		39.8391	10.67	2.41247
106890	77.354	1.068	0.1201		39.8731	10.68	2.4165
106991	77.424	1.069	0.1201		39.9092	10.69	2.4165
107092	77.494	1.0701	0.1202		39.9453	10.701	2.41851
107193	77.566	1.071	0.1205		39.9824	10.71	2.42455
107294	77.634	1.0721	0.1206		40.0174	10.721	2.42656
107395	77.706	1.0731	0.1207		40.0546	10.731	2.42857
107495	77.778	1.074	0.1209		40.0917	10.74	2.4326
107596	77.852	1.0752	0.121		40.1298	10.752	2.43461
107697	77.926	1.0762	0.1211		40.168	10.762	2.43662
107798	77.996	1.0773	0.1214		40.204	10.773	2.44266
107899	78.064	1.0783	0.1214		40.2391	10.783	2.44266
108000	78.13	1.0793	0.1216		40.2731	10.793	2.44668
108101	78.198	1.0803	0.1217		40.3082	10.803	2.44869
108201	78.26	1.0814	0.1218		40.3401	10.814	2.4507
108302	78.32	1.0823	0.122		40.371	10.823	2.45473
108403	78.386	1.0834	0.1222		40.4051	10.834	2.45875
108504	78.438	1.0844	0.1222		40.4319	10.844	2.45875
108605	78.494	1.0854	0.1223		40.4607	10.854	2.46076
108706	78.554	1.0864	0.1224		40.4917	10.864	2.46278
108806	78.604	1.0874	0.1226		40.5174	10.874	2.4668
108907	78.662	1.0885	0.1226		40.5473	10.885	2.4668
109008	78.716	1.0894	0.1227		40.5752	10.894	2.46881
109109	78.77	1.0903	0.1229		40.603	10.903	2.47284
109210	78.83	1.0913	0.123		40.6339	10.913	2.47485
109311	78.892	1.0923	0.1231		40.6659	10.923	2.47686
109411	78.954	1.0932	0.1232		40.6979	10.932	2.47887
109512	79.018	1.0942	0.1233		40.7308	10.942	2.48089
109613	79.076	1.0953	0.1234		40.7607	10.953	2.4829
109714	79.134	1.0963	0.1236		40.7906	10.963	2.48692
109815	79.204	1.0973	0.1236		40.8267	10.973	2.48692
109916	79.26	1.0982	0.1238		40.8556	10.982	2.49095
110016	79.324	1.0992	0.124		40.8886	10.992	2.49497
110117	79.384	1.1002	0.124		40.9195	11.002	2.49497
110218	79.446	1.1011	0.1242		40.9515	11.011	2.49899
110319	79.51	1.1021	0.1242		40.9844	11.021	2.49899
110420	79.574	1.103	0.1244		41.0174	11.03	2.50302
110521	79.636	1.1042	0.1245		41.0494	11.042	2.50503
110622	79.694	1.1051	0.1247		41.0793	11.051	2.50905
110722	79.756	1.1061	0.1248		41.1113	11.061	2.51107
110823	79.822	1.1071	0.1249		41.1453	11.071	2.51308
110924	79.878	1.1082	0.125		41.1741	11.082	2.51509
111025	79.94	1.1091	0.1252		41.2061	11.091	2.51911
111126	80.004	1.1101	0.1253		41.2391	11.101	2.52113
111227	80.074	1.1112	0.1255		41.2752	11.112	2.52515
111327	80.142	1.1122	0.1255		41.3102	11.122	2.52515
111428	80.206	1.1131	0.1257		41.3432	11.131	2.52918
111529	80.274	1.1142	0.1259		41.3783	11.142	2.5332
111630	80.334	1.1151	0.1259		41.4092	11.151	2.5332
111731	80.4	1.1163	0.1261		41.4432	11.163	2.53722
111832	80.466	1.1173	0.1262		41.4772	11.173	2.53924
111932	80.528	1.1182	0.1264		41.5092	11.182	2.54326
112033	80.592	1.1194	0.1265		41.5422	11.194	2.54527
112134	80.66	1.1203	0.1266		41.5772	11.203	2.54728
112235	80.73	1.1213	0.1268		41.6133	11.213	2.55131
112336	80.794	1.1224	0.127		41.6463	11.224	2.55533
112437	80.854	1.1234	0.127		41.6772	11.234	2.55533
112537	80.914	1.1244	0.1272		41.7082	11.244	2.55936
112638	80.97	1.1254	0.1273		41.737	11.254	2.56137
112739	81.034	1.1263	0.1274		41.77	11.263	2.56338
112840	81.098	1.1274	0.1275		41.803	11.274	2.56539
112941	81.162	1.1285	0.1277		41.836	11.285	2.56942
113042	81.224	1.1294	0.1278		41.868	11.294	2.57143
113143	81.288	1.1305	0.128		41.9009	11.305	2.57545
113243	81.35	1.1315	0.1281		41.9329	11.315	2.57746
113344	81.412	1.1326	0.1282		41.9649	11.326	2.57948
113445	81.476	1.1336	0.1284		41.9978	11.336	2.5835
113546	81.538	1.1346	0.1285		42.0298	11.346	2.58551
113647	81.6	1.1357	0.1287		42.0618	11.357	2.58954
113748	81.658	1.1367	0.1287		42.0917	11.367	2.58954
113848	81.722	1.1377	0.129		42.1247	11.377	2.59557
113949	81.78	1.1386	0.1291		42.1545	11.386	2.59759
114050	81.832	1.1397	0.1292		42.1814	11.397	2.5996
114151	81.886	1.1404	0.1294		42.2092	11.404	2.60362
114252	81.946	1.1415	0.1295		42.2401	11.415	2.60563
114353	82.008	1.1425	0.1296		42.2721	11.425	2.60765
114453	82.066	1.1435	0.1297		42.302	11.435	2.60966
114554	82.13	1.1445	0.1299		42.335	11.445	2.61368
114655	82.192	1.1456	0.1301		42.3669	11.456	2.61771
114756	82.25	1.1466	0.1302		42.3968	11.466	2.61972
114857	82.312	1.1476	0.1303		42.4288	11.476	2.62173
114958	82.368	1.1486	0.1305		42.4576	11.486	2.62575
115059	82.422	1.1496	0.1306		42.4855	11.496	2.62777
115159	82.48	1.1506	0.1307		42.5154	11.506	2.62978
115260	82.544	1.1514	0.1309		42.5484	11.514	2.6338
115361	82.598	1.1525	0.1309		42.5762	11.525	2.6338
115462	82.658	1.1536	0.1312		42.6071	11.536	2.63984
115563	82.716	1.1547	0.1312		42.637	11.547	2.63984
115664	82.776	1.1555	0.1314		42.6679	11.555	2.64386
115764	82.83	1.1566	0.1315		42.6958	11.566	2.64588
115865	82.888	1.1575	0.1317		42.7257	11.575	2.6499
115966	82.948	1.1585	0.1318		42.7566	11.585	2.65191
116067	83.004	1.1595	0.1319		42.7855	11.595	2.65392
116168	83.06	1.1606	0.1321		42.8143	11.606	2.65795
116269	83.114	1.1615	0.1323		42.8422	11.615	2.66197
116369	83.176	1.1625	0.1324		42.8741	11.625	2.66398
116470	83.236	1.1635	0.1324		42.9051	11.635	2.66398
116571	83.288	1.1645	0.1325		42.9319	11.645	2.666
116672	83.348	1.1656	0.1327		42.9628	11.656	2.67002
116773	83.404	1.1664	0.1328		42.9917	11.664	2.67203
116874	83.456	1.1675	0.1329		43.0185	11.675	2.67404
116974	83.512	1.1684	0.1331		43.0473	11.684	2.67807
117075	83.566	1.1695	0.1332		43.0752	11.695	2.68008
117176	83.622	1.1705	0.1333		43.104	11.705	2.68209
117277	83.686	1.1715	0.1334		43.137	11.715	2.6841
117378	83.746	1.1726	0.1335		43.1679	11.726	2.68612
117479	83.806	1.1734	0.1336		43.1989	11.734	2.68813
117579	83.868	1.1746	0.1339		43.2308	11.746	2.69416
117680	83.922	1.1756	0.134		43.2587	11.756	2.69618
117781	83.98	1.1765	0.1341		43.2886	11.765	2.69819
117882	84.046	1.1776	0.1342		43.3226	11.776	2.7002
117983	84.104	1.1785	0.1343		43.3525	11.785	2.70221
118084	84.172	1.1797	0.1345		43.3875	11.797	2.70624
118185	84.232	1.1808	0.1346		43.4185	11.808	2.70825
118285	84.29	1.1818	0.1347		43.4484	11.818	2.71026
118386	84.344	1.183	0.1349		43.4762	11.83	2.71429
118487	84.394	1.184	0.1351		43.502	11.84	2.71831
118588	84.444	1.185	0.1352		43.5277	11.85	2.72032
118689	84.492	1.1861	0.1353		43.5525	11.861	2.72233
118790	84.538	1.187	0.1355		43.5762	11.87	2.72636
118890	84.592	1.1879	0.1356		43.604	11.879	2.72837
118991	84.642	1.1889	0.1358		43.6298	11.889	2.73239
119092	84.69	1.19	0.1359		43.6545	11.9	2.73441
119193	84.74	1.191	0.136		43.6803	11.91	2.73642
119294	84.794	1.192	0.1362		43.7082	11.92	2.74044
119395	84.834	1.1931	0.1363		43.7288	11.931	2.74245
119495	84.874	1.1941	0.1366		43.7494	11.941	2.74849
119596	84.916	1.1952	0.1367		43.771	11.952	2.7505
119697	84.934	1.1967	0.137		43.7803	11.967	2.75654
119798	84.96	1.1976	0.1372		43.7937	11.976	2.76056
119899	84.992	1.1984	0.1374		43.8102	11.984	2.76459
120000	85.02	1.1991	0.1375		43.8246	11.991	2.7666
120101	85.056	1.2004	0.1378		43.8432	12.004	2.77264
120201	85.092	1.2012	0.1378		43.8618	12.012	2.77264
120302	85.13	1.2022	0.138		43.8813	12.022	2.77666
120403	85.172	1.2031	0.1381		43.903	12.031	2.77867
120504	85.214	1.2041	0.1382		43.9246	12.041	2.78068
120605	85.258	1.205	0.1385		43.9473	12.05	2.78672
120706	85.306	1.206	0.1386		43.9721	12.06	2.78873
120806	85.356	1.207	0.1388		43.9978	12.07	2.79276
120907	85.406	1.208	0.139		44.0236	12.08	2.79678
121008	85.454	1.209	0.1391		44.0484	12.09	2.79879
121109	85.508	1.2098	0.1392		44.0762	12.098	2.8008
121210	85.55	1.211	0.1395		44.0978	12.11	2.80684
121311	85.596	1.2121	0.1397		44.1216	12.121	2.81087
121411	85.636	1.213	0.1398		44.1422	12.13	2.81288
121512	85.682	1.2139	0.14		44.1659	12.139	2.8169
121613	85.732	1.215	0.1402		44.1917	12.15	2.82093
121714	85.784	1.2159	0.1403		44.2185	12.159	2.82294
121815	85.824	1.2171	0.1404		44.2391	12.171	2.82495
121916	85.864	1.2181	0.1407		44.2597	12.181	2.83099
122016	85.892	1.2194	0.1408		44.2741	12.194	2.833
122117	85.91	1.2205	0.1411		44.2834	12.205	2.83903
122218	85.932	1.2216	0.1413		44.2948	12.216	2.84306
122319	85.954	1.2226	0.1414		44.3061	12.226	2.84507
122420	85.978	1.2235	0.1417		44.3185	12.235	2.85111
122521	86.01	1.2244	0.1418		44.335	12.244	2.85312
122622	86.046	1.2253	0.142		44.3535	12.253	2.85714
122722	86.086	1.2263	0.1422		44.3741	12.263	2.86117
122823	86.124	1.2273	0.1423		44.3937	12.273	2.86318
122924	86.154	1.2283	0.1425		44.4092	12.283	2.8672
123025	86.188	1.2292	0.1427		44.4267	12.292	2.87123
123126	86.218	1.2303	0.1428		44.4422	12.303	2.87324
123227	86.258	1.2313	0.143		44.4628	12.313	2.87726
123327	86.276	1.2324	0.1432		44.4721	12.324	2.88129
123411	85.17	1.2384	0.1445		43.902	12.384	2.90744
123422	84.12	1.239	0.1452		43.3607	12.39	2.92153
123424	83.032	1.2397	0.1455		42.7999	12.397	2.92757
123426	80.832	1.241	0.1457		41.6659	12.41	2.93159
123428	77.416	1.2451	0.146		39.9051	12.451	2.93763
123430	72.398	1.2538	0.1465		37.3185	12.538	2.94769
123432	56.784	1.2538	0.1465		29.27	12.538	2.94769
123435	9.452	1.2538	0.1465		4.87215	12.538	2.94769
123437	0	1.4956	0.3347		0	14.956	6.73441

## Sheet: C-3
Time: 09:10:37,06/22/2019
diameter: 49.4	mm	height: 99.8	mm
Vertical 100kN force sensor (vertical force of test piece)
Control mode: displacement	Waveform: ramp
mm/s	End point: 1.9175	mm
time (ms)	vertical force (KN)	vertical deformation (mm)	transverse deformation (mm)		stress	axial strain	transverse strain
0	0	0	0		0	0	0
200	0.026	0.0019	0		0.0135653	0.0190381	0
400	0.004	0.0021	0.0001		0.00208697	0.0210421	0.00202429
600	0.042	0.0037	0.0001		0.0219132	0.0370741	0.00202429
801	0.018	0.0039	0.0001		0.00939137	0.0390782	0.00202429
1002	0.058	0.0058	0.0001		0.0302611	0.0581162	0.00202429
1202	0.034	0.006	0.0001		0.0177392	0.0601202	0.00202429
1402	0.066	0.0077	0.0001		0.034435	0.0771543	0.00202429
1602	0.054	0.0083	0.0001		0.0281741	0.0831663	0.00202429
1803	0.074	0.0095	0.0001		0.0386089	0.0951904	0.00202429
2004	0.062	0.0101	0.0001		0.032348	0.101202	0.00202429
2204	0.086	0.0115	0.0001		0.0448699	0.11523	0.00202429
2404	0.072	0.0122	0.0001		0.0375655	0.122244	0.00202429
2604	0.096	0.0135	0.0001		0.0500873	0.135271	0.00202429
2805	0.074	0.014	0.0002		0.0386089	0.140281	0.00404858
3005	0.106	0.0158	0.0001		0.0553047	0.158317	0.00202429
3206	0.094	0.0161	0.0001		0.0490438	0.161323	0.00202429
3406	0.114	0.0177	0.0001		0.0594786	0.177355	0.00202429
3606	0.098	0.0182	0.0001		0.0511308	0.182365	0.00202429
3808	0.122	0.0195	0.0001		0.0636526	0.195391	0.00202429
4009	0.104	0.0201	0.0002		0.0542612	0.201403	0.00404858
4210	0.128	0.0218	0.0002		0.066783	0.218437	0.00404858
4410	0.114	0.0221	0.0001		0.0594786	0.221443	0.00202429
4610	0.132	0.0233	0.0002		0.06887	0.233467	0.00404858
4810	0.128	0.0247	0.0001		0.066783	0.247495	0.00202429
5011	0.132	0.025	0.0001		0.06887	0.250501	0.00202429
5212	0.142	0.0264	0.0001		0.0740874	0.264529	0.00202429
5412	0.146	0.0276	0.0001		0.0761744	0.276553	0.00202429
5612	0.15	0.0287	0.0001		0.0782614	0.287575	0.00202429
5812	0.148	0.0297	0.0001		0.0772179	0.297595	0.00202429
6013	0.152	0.0304	0.0001		0.0793049	0.304609	0.00202429
6213	0.158	0.0313	0.0001		0.0824353	0.313627	0.00202429
6414	0.162	0.0322	0.0001		0.0845223	0.322645	0.00202429
6614	0.164	0.0333	0.0001		0.0855658	0.333667	0.00202429
6814	0.172	0.0343	0.0001		0.0897397	0.343687	0.00202429
7015	0.172	0.0354	0.0001		0.0897397	0.354709	0.00202429
7215	0.174	0.0364	0.0001		0.0907832	0.364729	0.00202429
7416	0.178	0.0373	0.0001		0.0928702	0.373747	0.00202429
7616	0.182	0.0383	0.0001		0.0949571	0.383768	0.00202429
7816	0.188	0.0393	0.0001		0.0980876	0.393788	0.00202429
8018	0.192	0.0405	0.0001		0.100175	0.405812	0.00202429
8219	0.196	0.0414	0.0001		0.102262	0.41483	0.00202429
8420	0.2	0.0423	0.0001		0.104349	0.423848	0.00202429
8620	0.206	0.0433	0.0001		0.107479	0.433868	0.00202429
8820	0.21	0.0444	0.0001		0.109566	0.44489	0.00202429
9020	0.212	0.0454	0.0001		0.110609	0.45491	0.00202429
9221	0.22	0.0465	0.0001		0.114783	0.465932	0.00202429
9422	0.222	0.0476	0.0001		0.115827	0.476954	0.00202429
9622	0.226	0.0485	0.0001		0.117914	0.485972	0.00202429
9822	0.228	0.0495	0.0001		0.118957	0.495992	0.00202429
10022	0.234	0.0506	0.0001		0.122088	0.507014	0.00202429
10223	0.238	0.0516	0.0001		0.124175	0.517034	0.00202429
10423	0.244	0.0526	0.0001		0.127305	0.527054	0.00202429
10624	0.246	0.0534	0		0.128349	0.53507	0
10824	0.25	0.0545	0.0001		0.130436	0.546092	0.00202429
11024	0.254	0.0555	0		0.132523	0.556112	0
11226	0.26	0.0566	0		0.135653	0.567134	0
11427	0.262	0.0576	0		0.136697	0.577154	0
11628	0.268	0.0587	0.0001		0.139827	0.588176	0.00202429
11828	0.272	0.0598	0.0001		0.141914	0.599198	0.00202429
12028	0.274	0.0607	0.0001		0.142957	0.608216	0.00202429
12228	0.278	0.0617	0.0001		0.145044	0.618236	0.00202429
12429	0.284	0.0626	0.0001		0.148175	0.627255	0.00202429
12630	0.288	0.0636	0		0.150262	0.637275	0
12830	0.292	0.0646	0.0001		0.152349	0.647295	0.00202429
13030	0.294	0.0656	0		0.153392	0.657315	0
13230	0.302	0.0664	0		0.157566	0.665331	0
13431	0.304	0.0674	0		0.15861	0.675351	0
13631	0.31	0.0684	0		0.16174	0.685371	0
13832	0.314	0.0696	0.0001		0.163827	0.697395	0.00202429
14032	0.318	0.0707	0		0.165914	0.708417	0
14232	0.324	0.0716	0		0.169045	0.717435	0
14434	0.326	0.0726	0		0.170088	0.727455	0
14635	0.33	0.0736	0		0.172175	0.737475	0
14836	0.334	0.0745	0		0.174262	0.746493	0
15036	0.342	0.0756	0		0.178436	0.757515	0
15236	0.346	0.0766	0		0.180523	0.767535	0
15436	0.348	0.0776	0		0.181566	0.777555	0
15637	0.35	0.0786	0		0.18261	0.787575	0
15838	0.36	0.0795	0		0.187827	0.796593	0
16038	0.362	0.0806	0		0.188871	0.807615	0
16238	0.366	0.0817	0		0.190958	0.818637	0
16438	0.37	0.0826	0		0.193045	0.827655	0
16639	0.374	0.0835	-0.0001		0.195132	0.836673	-0.00202429
16839	0.378	0.0844	-0.0001		0.197219	0.845691	-0.00202429
17040	0.384	0.0853	-0.0001		0.200349	0.854709	-0.00202429
17240	0.388	0.0863	-0.0001		0.202436	0.864729	-0.00202429
17440	0.392	0.0872	-0.0001		0.204523	0.873747	-0.00202429
17642	0.398	0.0883	-0.0001		0.207654	0.88477	-0.00202429
17843	0.404	0.0892	0		0.210784	0.893788	0
18044	0.41	0.0904	-0.0001		0.213914	0.905812	-0.00202429
18244	0.414	0.0913	-0.0001		0.216001	0.91483	-0.00202429
18444	0.422	0.0921	-0.0001		0.220175	0.922846	-0.00202429
18644	0.426	0.0932	-0.0002		0.222262	0.933868	-0.00404858
18845	0.434	0.0942	-0.0001		0.226436	0.943888	-0.00202429
19046	0.436	0.0953	-0.0001		0.22748	0.95491	-0.00202429
19246	0.444	0.0963	-0.0001		0.231654	0.96493	-0.00202429
19446	0.448	0.0972	-0.0001		0.233741	0.973948	-0.00202429
19646	0.452	0.0986	-0.0001		0.235828	0.987976	-0.00202429
19847	0.458	0.0996	-0.0001		0.238958	0.997996	-0.00202429
20047	0.462	0.1005	-0.0001		0.241045	1.00701	-0.00202429
20248	0.468	0.1014	-0.0001		0.244175	1.01603	-0.00202429
20448	0.472	0.1026	-0.0001		0.246262	1.02806	-0.00202429
20648	0.478	0.1035	-0.0002		0.249393	1.03707	-0.00404858
20850	0.484	0.1044	-0.0002		0.252523	1.04609	-0.00404858
21051	0.492	0.1054	-0.0002		0.256697	1.05611	-0.00404858
21252	0.498	0.1064	-0.0002		0.259828	1.06613	-0.00404858
21452	0.504	0.1073	-0.0002		0.262958	1.07515	-0.00404858
21652	0.51	0.1083	-0.0002		0.266089	1.08517	-0.00404858
21852	0.516	0.1092	-0.0002		0.269219	1.09419	-0.00404858
22053	0.522	0.1103	-0.0002		0.27235	1.10521	-0.00404858
22254	0.528	0.1114	-0.0003		0.27548	1.11623	-0.00607287
22454	0.538	0.1125	-0.0003		0.280697	1.12725	-0.00607287
22654	0.542	0.1135	-0.0002		0.282784	1.13727	-0.00404858
22854	0.546	0.1144	-0.0003		0.284871	1.14629	-0.00607287
23055	0.552	0.1154	-0.0003		0.288002	1.15631	-0.00607287
23255	0.56	0.1165	-0.0003		0.292176	1.16733	-0.00607287
23456	0.568	0.1175	-0.0003		0.29635	1.17735	-0.00607287
23656	0.574	0.1184	-0.0003		0.29948	1.18637	-0.00607287
23856	0.58	0.1194	-0.0004		0.302611	1.19639	-0.00809717
24058	0.588	0.1203	-0.0003		0.306785	1.20541	-0.00607287
24259	0.596	0.1213	-0.0003		0.310959	1.21543	-0.00607287
24460	0.602	0.1224	-0.0004		0.314089	1.22645	-0.00809717
24660	0.61	0.1233	-0.0004		0.318263	1.23547	-0.00809717
24860	0.618	0.1241	-0.0004		0.322437	1.24349	-0.00809717
25060	0.626	0.125	-0.0004		0.326611	1.25251	-0.00809717
25261	0.634	0.1261	-0.0004		0.330785	1.26353	-0.00809717
25462	0.642	0.1271	-0.0004		0.334959	1.27355	-0.00809717
25662	0.65	0.1282	-0.0004		0.339133	1.28457	-0.00809717
25862	0.664	0.1294	-0.0004		0.346437	1.29659	-0.00809717
26062	0.674	0.1306	-0.0004		0.351654	1.30862	-0.00809717
26263	0.686	0.1316	-0.0005		0.357915	1.31864	-0.0101215
26463	0.694	0.1327	-0.0005		0.362089	1.32966	-0.0101215
26664	0.704	0.1338	-0.0005		0.367307	1.34068	-0.0101215
26864	0.712	0.1348	-0.0005		0.371481	1.3507	-0.0101215
27064	0.722	0.1356	-0.0005		0.376698	1.35872	-0.0101215
27265	0.73	0.1366	-0.0005		0.380872	1.36874	-0.0101215
27465	0.74	0.1376	-0.0005		0.386089	1.37876	-0.0101215
27666	0.748	0.1386	-0.0005		0.390263	1.38878	-0.0101215
27866	0.758	0.1396	-0.0006		0.395481	1.3988	-0.0121457
28066	0.77	0.1405	-0.0006		0.401742	1.40782	-0.0121457
28268	0.782	0.1417	-0.0006		0.408003	1.41984	-0.0121457
28469	0.788	0.1424	-0.0006		0.411133	1.42685	-0.0121457
28670	0.8	0.1435	-0.0006		0.417394	1.43788	-0.0121457
28870	0.812	0.1444	-0.0006		0.423655	1.44689	-0.0121457
29070	0.826	0.1454	-0.0006		0.430959	1.45691	-0.0121457
29270	0.836	0.1464	-0.0006		0.436177	1.46693	-0.0121457
29471	0.848	0.1474	-0.0006		0.442438	1.47695	-0.0121457
29672	0.862	0.1484	-0.0007		0.449742	1.48697	-0.01417
29872	0.872	0.1493	-0.0007		0.454959	1.49599	-0.01417
30072	0.884	0.1503	-0.0007		0.46122	1.50601	-0.01417
30272	0.894	0.1512	-0.0007		0.466438	1.51503	-0.01417
30473	0.906	0.1522	-0.0007		0.472699	1.52505	-0.01417
30673	0.92	0.153	-0.0008		0.480003	1.53307	-0.0161943
30874	0.936	0.154	-0.0008		0.488351	1.54309	-0.0161943
31074	0.948	0.155	-0.0008		0.494612	1.55311	-0.0161943
31274	0.964	0.1561	-0.0008		0.50296	1.56413	-0.0161943
31476	0.974	0.1571	-0.0008		0.508177	1.57415	-0.0161943
31677	0.99	0.1581	-0.0008		0.516525	1.58417	-0.0161943
31878	1.006	0.1594	-0.0009		0.524873	1.59719	-0.0182186
32078	1.02	0.1603	-0.0008		0.532177	1.60621	-0.0161943
32278	1.034	0.1614	-0.0008		0.539482	1.61723	-0.0161943
32478	1.05	0.1624	-0.0009		0.54783	1.62725	-0.0182186
32679	1.06	0.1636	-0.0008		0.553047	1.63928	-0.0161943
32880	1.074	0.1646	-0.0009		0.560351	1.6493	-0.0182186
33080	1.088	0.1658	-0.0009		0.567656	1.66132	-0.0182186
33280	1.1	0.1666	-0.0009		0.573917	1.66934	-0.0182186
33480	1.114	0.1674	-0.0009		0.581221	1.67735	-0.0182186
33681	1.13	0.1684	-0.0009		0.589569	1.68737	-0.0182186
33881	1.146	0.1694	-0.0009		0.597917	1.69739	-0.0182186
34082	1.162	0.1702	-0.0009		0.606265	1.70541	-0.0182186
34282	1.178	0.171	-0.0009		0.614613	1.71343	-0.0182186
34482	1.196	0.1721	-0.0026		0.624004	1.72445	-0.0526316
34684	1.214	0.173	-0.0027		0.633395	1.73347	-0.0546559
34885	1.236	0.174	-0.0025		0.644874	1.74349	-0.0506073
35086	1.258	0.1749	-0.0025		0.656352	1.75251	-0.0506073
35286	1.284	0.1762	-0.0026		0.669917	1.76553	-0.0526316
35486	1.304	0.1773	-0.0025		0.680352	1.77655	-0.0506073
35686	1.33	0.1785	-0.0025		0.693918	1.78858	-0.0506073
35887	1.348	0.1795	-0.0025		0.703309	1.7986	-0.0506073
36088	1.372	0.1804	-0.0025		0.715831	1.80762	-0.0506073
36288	1.396	0.1815	-0.0025		0.728353	1.81864	-0.0506073
36488	1.416	0.1823	-0.0025		0.738787	1.82665	-0.0506073
36688	1.44	0.1833	-0.0025		0.751309	1.83667	-0.0506073
36889	1.466	0.1844	-0.0025		0.764875	1.8477	-0.0506073
37089	1.49	0.1855	-0.0025		0.777396	1.85872	-0.0506073
37290	1.512	0.1866	-0.0026		0.788875	1.86974	-0.0526316
37490	1.536	0.188	-0.0025		0.801396	1.88377	-0.0506073
37690	1.56	0.1891	-0.0025		0.813918	1.89479	-0.0506073
37892	1.582	0.1903	-0.0026		0.825397	1.90681	-0.0526316
38093	1.598	0.1911	-0.0026		0.833745	1.91483	-0.0526316
38294	1.616	0.1919	-0.0026		0.843136	1.92285	-0.0526316
38494	1.636	0.1927	-0.0026		0.853571	1.93086	-0.0526316
38694	1.658	0.1934	-0.0026		0.865049	1.93788	-0.0526316
38894	1.686	0.1942	-0.0026		0.879658	1.94589	-0.0526316
39095	1.714	0.1951	-0.0026		0.894267	1.95491	-0.0526316
39296	1.746	0.1958	-0.0026		0.910962	1.96192	-0.0526316
39496	1.782	0.197	-0.0026		0.929745	1.97395	-0.0526316
39696	1.824	0.1977	-0.0026		0.951658	1.98096	-0.0526316
39896	1.878	0.1987	-0.0027		0.979832	1.99098	-0.0546559
40097	1.938	0.1998	-0.0026		1.01114	2.002	-0.0526316
40297	2	0.2007	-0.0027		1.04349	2.01102	-0.0546559
40498	2.07	0.2018	-0.0027		1.08001	2.02204	-0.0546559
40698	2.148	0.2028	-0.0027		1.1207	2.03206	-0.0546559
40898	2.23	0.2039	-0.0027		1.16349	2.04309	-0.0546559
41100	2.316	0.2049	-0.0028		1.20836	2.05311	-0.0566802
41301	2.406	0.2058	-0.0028		1.25531	2.06212	-0.0566802
41502	2.496	0.2066	-0.0029		1.30227	2.07014	-0.0587045
41702	2.614	0.2078	-0.0029		1.36383	2.08216	-0.0587045
41902	2.744	0.2087	-0.003		1.43166	2.09118	-0.0607287
42102	2.88	0.2097	-0.003		1.50262	2.1012	-0.0607287
42303	3.018	0.2107	-0.003		1.57462	2.11122	-0.0607287
42504	3.162	0.2119	-0.0031		1.64975	2.12325	-0.062753
42704	3.312	0.2131	-0.0031		1.72801	2.13527	-0.062753
42904	3.458	0.2143	-0.0032		1.80419	2.14729	-0.0647773
43104	3.6	0.2155	-0.0033		1.87827	2.15932	-0.0668016
43305	3.734	0.2167	-0.0034		1.94819	2.17134	-0.0688259
43505	3.858	0.2177	-0.0034		2.01288	2.18136	-0.0688259
43706	3.98	0.2188	-0.0035		2.07654	2.19238	-0.0708502
43906	4.08	0.2197	-0.0035		2.12871	2.2014	-0.0708502
44106	4.182	0.2208	-0.0036		2.18193	2.21242	-0.0728745
44308	4.274	0.2218	-0.0036		2.22993	2.22244	-0.0728745
44509	4.372	0.2229	-0.0036		2.28106	2.23347	-0.0728745
44710	4.464	0.2239	-0.0036		2.32906	2.24349	-0.0728745
44910	4.548	0.225	-0.0036		2.37288	2.25451	-0.0728745
45110	4.632	0.2261	-0.0036		2.41671	2.26553	-0.0728745
45310	4.706	0.2271	-0.0036		2.45532	2.27555	-0.0728745
45511	4.78	0.2279	-0.0036		2.49393	2.28357	-0.0728745
45712	4.852	0.229	-0.0036		2.53149	2.29459	-0.0728745
45912	4.912	0.2299	-0.0036		2.5628	2.30361	-0.0728745
46112	4.972	0.2307	-0.0036		2.5941	2.31162	-0.0728745
46312	5.036	0.2315	-0.0037		2.6275	2.31964	-0.0748988
46513	5.106	0.2326	-0.0036		2.66402	2.33066	-0.0728745
46713	5.176	0.2337	-0.0036		2.70054	2.34168	-0.0728745
46914	5.248	0.2347	-0.0037		2.7381	2.3517	-0.0748988
47114	5.316	0.2359	-0.0036		2.77358	2.36373	-0.0728745
47314	5.386	0.2369	-0.0036		2.81011	2.37375	-0.0728745
47515	5.454	0.238	-0.0036		2.84558	2.38477	-0.0728745
47715	5.518	0.2392	-0.0037		2.87898	2.39679	-0.0748988
47916	5.574	0.2398	-0.0036		2.90819	2.40281	-0.0728745
48116	5.636	0.2409	-0.0037		2.94054	2.41383	-0.0748988
48316	5.702	0.2419	-0.0037		2.97498	2.42385	-0.0748988
48518	5.768	0.2429	-0.0036		3.00941	2.43387	-0.0728745
48719	5.834	0.2439	-0.0036		3.04385	2.44389	-0.0728745
48920	5.9	0.2449	-0.0036		3.07828	2.45391	-0.0728745
49120	5.96	0.2459	-0.0036		3.10959	2.46393	-0.0728745
49320	6.02	0.2468	-0.0036		3.14089	2.47295	-0.0728745
49520	6.078	0.2478	-0.0036		3.17115	2.48297	-0.0728745
49721	6.142	0.2488	-0.0037		3.20454	2.49299	-0.0748988
49922	6.208	0.2499	-0.0036		3.23898	2.50401	-0.0728745
50122	6.272	0.2507	-0.0036		3.27237	2.51202	-0.0728745
50322	6.338	0.2519	-0.0037		3.3068	2.52405	-0.0748988
50522	6.406	0.2528	-0.0036		3.34228	2.53307	-0.0728745
50723	6.47	0.2537	-0.0036		3.37567	2.54208	-0.0728745
50923	6.538	0.2548	-0.0036		3.41115	2.55311	-0.0728745
51124	6.604	0.2558	-0.0036		3.44559	2.56313	-0.0728745
51324	6.67	0.2567	-0.0036		3.48002	2.57214	-0.0728745
51524	6.738	0.2577	-0.0036		3.5155	2.58216	-0.0728745
51726	6.812	0.2587	-0.0036		3.55411	2.59218	-0.0728745
51927	6.878	0.2596	-0.0036		3.58854	2.6012	-0.0728745
52128	6.95	0.2607	-0.0036		3.62611	2.61222	-0.0728745
52328	7.022	0.2617	-0.0036		3.66368	2.62224	-0.0728745
52528	7.088	0.2628	-0.0036		3.69811	2.63327	-0.0728745
52728	7.156	0.2638	-0.0036		3.73359	2.64329	-0.0728745
52929	7.224	0.2648	-0.0036		3.76907	2.65331	-0.0728745
53130	7.292	0.2658	-0.0036		3.80455	2.66333	-0.0728745
53330	7.358	0.2668	-0.0036		3.83898	2.67335	-0.0728745
53530	7.428	0.2679	-0.0036		3.8755	2.68437	-0.0728745
53730	7.502	0.2686	-0.0036		3.91411	2.69138	-0.0728745
53931	7.574	0.2697	-0.0036		3.95168	2.7024	-0.0728745
54131	7.65	0.2707	-0.0036		3.99133	2.71242	-0.0728745
54332	7.726	0.2718	-0.0036		4.03098	2.72345	-0.0728745
54532	7.798	0.2727	-0.0036		4.06855	2.73246	-0.0728745
54732	7.872	0.2738	-0.0035		4.10716	2.74349	-0.0708502
54934	7.946	0.2748	-0.0035		4.14577	2.75351	-0.0708502
55135	8.024	0.2759	-0.0036		4.18646	2.76453	-0.0728745
55336	8.092	0.2768	-0.0036		4.22194	2.77355	-0.0728745
55536	8.166	0.2778	-0.0035		4.26055	2.78357	-0.0708502
55736	8.244	0.2788	-0.0035		4.30125	2.79359	-0.0708502
55936	8.318	0.2799	-0.0035		4.33985	2.80461	-0.0708502
56137	8.39	0.2808	-0.0035		4.37742	2.81363	-0.0708502
56338	8.464	0.2818	-0.0035		4.41603	2.82365	-0.0708502
56538	8.538	0.2828	-0.0035		4.45464	2.83367	-0.0708502
56738	8.614	0.2838	-0.0035		4.49429	2.84369	-0.0708502
56938	8.692	0.2848	-0.0035		4.53499	2.85371	-0.0708502
57139	8.768	0.2857	-0.0035		4.57464	2.86273	-0.0708502
57339	8.844	0.2869	-0.0035		4.61429	2.87475	-0.0708502
57540	8.918	0.2879	-0.0035		4.6529	2.88477	-0.0708502
57740	8.992	0.2888	-0.0034		4.69151	2.89379	-0.0688259
57940	9.066	0.2899	-0.0035		4.73012	2.90481	-0.0708502
58142	9.138	0.2907	-0.0035		4.76768	2.91283	-0.0708502
58343	9.216	0.2918	-0.0035		4.80838	2.92385	-0.0708502
58544	9.292	0.2928	-0.0035		4.84803	2.93387	-0.0708502
58744	9.364	0.2939	-0.0034		4.8856	2.94489	-0.0688259
58944	9.442	0.2947	-0.0035		4.92629	2.95291	-0.0708502
59144	9.516	0.2957	-0.0035		4.9649	2.96293	-0.0708502
59345	9.592	0.2967	-0.0034		5.00455	2.97295	-0.0688259
59546	9.668	0.2977	-0.0035		5.04421	2.98297	-0.0708502
59746	9.752	0.2988	-0.0034		5.08803	2.99399	-0.0688259
59946	9.828	0.2998	-0.0034		5.12769	3.00401	-0.0688259
60146	9.902	0.3007	-0.0034		5.16629	3.01303	-0.0688259
60347	9.978	0.3018	-0.0034		5.20595	3.02405	-0.0688259
60547	10.056	0.3028	-0.0034		5.24664	3.03407	-0.0688259
60748	10.134	0.3037	-0.0034		5.28734	3.04309	-0.0688259
60948	10.214	0.3047	-0.0035		5.32908	3.05311	-0.0708502
61148	10.292	0.3059	-0.0034		5.36977	3.06513	-0.0688259
61350	10.37	0.3069	-0.0034		5.41047	3.07515	-0.0688259
61551	10.444	0.3079	-0.0035		5.44908	3.08517	-0.0708502
61752	10.52	0.3089	-0.0034		5.48873	3.09519	-0.0688259
61952	10.6	0.3098	-0.0034		5.53047	3.10421	-0.0688259
62152	10.676	0.3107	-0.0034		5.57012	3.11323	-0.0688259
62352	10.752	0.3118	-0.0034		5.60978	3.12425	-0.0688259
62553	10.834	0.3128	-0.0034		5.65256	3.13427	-0.0688259
62754	10.91	0.3138	-0.0034		5.69221	3.14429	-0.0688259
62954	10.988	0.3149	-0.0034		5.73291	3.15531	-0.0688259
63154	11.06	0.3159	-0.0034		5.77047	3.16533	-0.0688259
63354	11.132	0.3168	-0.0034		5.80804	3.17435	-0.0688259
63555	11.208	0.3178	-0.0034		5.84769	3.18437	-0.0688259
63755	11.286	0.3186	-0.0034		5.88839	3.19238	-0.0688259
63956	11.362	0.3196	-0.0034		5.92804	3.2024	-0.0688259
64156	11.438	0.3206	-0.0034		5.96769	3.21242	-0.0688259
64356	11.512	0.3217	-0.0034		6.0063	3.22345	-0.0688259
64558	11.592	0.3227	-0.0034		6.04804	3.23347	-0.0688259
64759	11.668	0.3237	-0.0034		6.08769	3.24349	-0.0688259
64960	11.746	0.3246	-0.0034		6.12839	3.25251	-0.0688259
65160	11.822	0.3257	-0.0034		6.16804	3.26353	-0.0688259
65360	11.9	0.3266	-0.0034		6.20874	3.27255	-0.0688259
65560	11.978	0.3276	-0.0034		6.24943	3.28257	-0.0688259
65761	12.054	0.3288	-0.0033		6.28908	3.29459	-0.0668016
65962	12.132	0.3295	-0.0033		6.32978	3.3016	-0.0668016
66162	12.206	0.3306	-0.0033		6.36839	3.31263	-0.0668016
66362	12.284	0.3315	-0.0033		6.40908	3.32164	-0.0668016
66562	12.362	0.3325	-0.0034		6.44978	3.33166	-0.0688259
66763	12.444	0.3335	-0.0033		6.49256	3.34168	-0.0668016
66963	12.524	0.3344	-0.0033		6.5343	3.3507	-0.0668016
67164	12.61	0.3355	-0.0034		6.57917	3.36172	-0.0688259
67364	12.696	0.3365	-0.0033		6.62404	3.37174	-0.0668016
67564	12.774	0.3377	-0.0033		6.66474	3.38377	-0.0668016
67765	12.85	0.3386	-0.0033		6.70439	3.39279	-0.0668016
67965	12.926	0.3396	-0.0034		6.74404	3.40281	-0.0688259
68166	13.002	0.3405	-0.0033		6.7837	3.41182	-0.0668016
68366	13.084	0.3415	-0.0033		6.82648	3.42184	-0.0668016
68566	13.166	0.3425	-0.0033		6.86926	3.43186	-0.0668016
68768	13.252	0.3435	-0.0033		6.91413	3.44188	-0.0668016
68969	13.334	0.3445	-0.0034		6.95691	3.4519	-0.0688259
69170	13.414	0.3456	-0.0033		6.99865	3.46293	-0.0668016
69370	13.492	0.3465	-0.0033		7.03935	3.47194	-0.0668016
69570	13.572	0.3475	-0.0033		7.08109	3.48196	-0.0668016
69770	13.652	0.3486	-0.0033		7.12283	3.49299	-0.0668016
69971	13.732	0.3496	-0.0033		7.16457	3.50301	-0.0668016
70172	13.812	0.3506	-0.0033		7.20631	3.51303	-0.0668016
70372	13.888	0.3515	-0.0033		7.24596	3.52204	-0.0668016
70572	13.97	0.3527	-0.0033		7.28874	3.53407	-0.0668016
70772	14.048	0.3535	-0.0033		7.32944	3.54208	-0.0668016
70973	14.128	0.3544	-0.0033		7.37118	3.5511	-0.0668016
71173	14.21	0.3554	-0.0033		7.41396	3.56112	-0.0668016
71374	14.284	0.3564	-0.0033		7.45257	3.57114	-0.0668016
71574	14.362	0.3573	-0.0033		7.49327	3.58016	-0.0668016
71774	14.45	0.3582	-0.0033		7.53918	3.58918	-0.0668016
71976	14.536	0.3593	-0.0034		7.58405	3.6002	-0.0688259
72177	14.624	0.3603	-0.0033		7.62996	3.61022	-0.0668016
72378	14.722	0.3613	-0.0034		7.68109	3.62024	-0.0688259
72578	14.81	0.3625	-0.0033		7.72701	3.63226	-0.0668016
72778	14.898	0.3635	-0.0033		7.77292	3.64228	-0.0668016
72978	14.982	0.3646	-0.0033		7.81675	3.65331	-0.0668016
73179	15.066	0.3656	-0.0033		7.86057	3.66333	-0.0668016
73380	15.154	0.3667	-0.0033		7.90649	3.67435	-0.0668016
73580	15.234	0.3676	-0.0033		7.94823	3.68337	-0.0668016
73780	15.316	0.3687	-0.0032		7.99101	3.69439	-0.0647773
73980	15.396	0.3698	-0.0033		8.03275	3.70541	-0.0668016
74181	15.478	0.3707	-0.0033		8.07553	3.71443	-0.0668016
74381	15.556	0.3718	-0.0033		8.11623	3.72545	-0.0668016
74582	15.634	0.3727	-0.0033		8.15692	3.73447	-0.0668016
74782	15.718	0.3736	-0.0033		8.20075	3.74349	-0.0668016
74982	15.802	0.3747	-0.0032		8.24458	3.75451	-0.0647773
75184	15.882	0.3756	-0.0033		8.28631	3.76353	-0.0668016
75385	15.964	0.3767	-0.0033		8.3291	3.77455	-0.0668016
75586	16.044	0.3777	-0.0032		8.37084	3.78457	-0.0647773
75786	16.12	0.3788	-0.0033		8.41049	3.79559	-0.0668016
75986	16.2	0.3798	-0.0032		8.45223	3.80561	-0.0647773
76186	16.278	0.3806	-0.0033		8.49292	3.81363	-0.0668016
76387	16.356	0.3818	-0.0032		8.53362	3.82565	-0.0647773
76588	16.432	0.3828	-0.0032		8.57327	3.83567	-0.0647773
76788	16.508	0.3837	-0.0033		8.61293	3.84469	-0.0668016
76988	16.586	0.3847	-0.0033		8.65362	3.85471	-0.0668016
77188	16.662	0.3857	-0.0032		8.69327	3.86473	-0.0647773
77389	16.738	0.3866	-0.0032		8.73293	3.87375	-0.0647773
77589	16.82	0.3877	-0.0032		8.77571	3.88477	-0.0647773
77790	16.898	0.3885	-0.0033		8.8164	3.89279	-0.0668016
77990	16.98	0.3896	-0.0032		8.85919	3.90381	-0.0647773
78190	17.058	0.3905	-0.0032		8.89988	3.91283	-0.0647773
78392	17.136	0.3915	-0.0032		8.94058	3.92285	-0.0647773
78593	17.22	0.3926	-0.0032		8.98441	3.93387	-0.0647773
78794	17.298	0.3935	-0.0032		9.0251	3.94289	-0.0647773
78994	17.376	0.3945	-0.0032		9.0658	3.95291	-0.0647773
79194	17.452	0.3956	-0.0032		9.10545	3.96393	-0.0647773
79394	17.532	0.3963	-0.0032		9.14719	3.97094	-0.0647773
79595	17.614	0.3974	-0.0032		9.18997	3.98196	-0.0647773
79796	17.702	0.3985	-0.0032		9.23589	3.99299	-0.0647773
79996	17.788	0.3995	-0.0032		9.28076	4.00301	-0.0647773
80196	17.878	0.4006	-0.0032		9.32771	4.01403	-0.0647773
80396	17.964	0.4016	-0.0032		9.37258	4.02405	-0.0647773
80597	18.048	0.4028	-0.0032		9.41641	4.03607	-0.0647773
80797	18.126	0.4036	-0.0032		9.4571	4.04409	-0.0647773
80998	18.21	0.4046	-0.0032		9.50093	4.05411	-0.0647773
81198	18.288	0.4057	-0.0032		9.54163	4.06513	-0.0647773
81398	18.368	0.4067	-0.0032		9.58337	4.07515	-0.0647773
81600	18.444	0.4077	-0.0032		9.62302	4.08517	-0.0647773
81801	18.524	0.4087	-0.0032		9.66476	4.09519	-0.0647773
82002	18.604	0.4097	-0.0032		9.7065	4.10521	-0.0647773
82202	18.682	0.4108	-0.0031		9.74719	4.11623	-0.062753
82402	18.758	0.4116	-0.0032		9.78685	4.12425	-0.0647773
82602	18.836	0.4126	-0.0031		9.82754	4.13427	-0.062753
82803	18.918	0.4137	-0.0031		9.87032	4.14529	-0.062753
83004	18.992	0.4145	-0.0032		9.90893	4.15331	-0.0647773
83204	19.068	0.4156	-0.0031		9.94859	4.16433	-0.062753
83404	19.144	0.4166	-0.0031		9.98824	4.17435	-0.062753
83604	19.224	0.4176	-0.0032		10.03	4.18437	-0.0647773
83805	19.302	0.4185	-0.0031		10.0707	4.19339	-0.062753
84005	19.378	0.4195	-0.0032		10.1103	4.20341	-0.0647773
84206	19.456	0.4204	-0.0032		10.151	4.21242	-0.0647773
84406	19.536	0.4215	-0.0032		10.1928	4.22345	-0.0647773
84606	19.612	0.4225	-0.0031		10.2324	4.23347	-0.062753
84808	19.69	0.4234	-0.0032		10.2731	4.24248	-0.0647773
85009	19.774	0.4245	-0.0031		10.3169	4.25351	-0.062753
85210	19.874	0.4258	-0.0031		10.3691	4.26653	-0.062753
85410	19.96	0.4268	-0.0031		10.414	4.27655	-0.062753
85610	20.054	0.4278	-0.0031		10.463	4.28657	-0.062753
85810	20.136	0.4288	-0.0031		10.5058	4.29659	-0.062753
86011	20.22	0.4299	-0.0031		10.5496	4.30762	-0.062753
86212	20.3	0.431	-0.0031		10.5914	4.31864	-0.062753
86412	20.376	0.432	-0.0031		10.631	4.32866	-0.062753
86612	20.452	0.433	-0.0031		10.6707	4.33868	-0.062753
86812	20.524	0.434	-0.0031		10.7082	4.3487	-0.062753
87013	20.6	0.4349	-0.0031		10.7479	4.35772	-0.062753
87213	20.676	0.4358	-0.0031		10.7875	4.36673	-0.062753
87414	20.756	0.4367	-0.0031		10.8293	4.37575	-0.062753
87614	20.838	0.4378	-0.0031		10.8721	4.38677	-0.062753
87814	20.912	0.4387	-0.003		10.9107	4.39579	-0.0607287
88015	20.984	0.4396	-0.0031		10.9482	4.40481	-0.062753
88215	21.064	0.4408	-0.0031		10.99	4.41683	-0.062753
88416	21.14	0.4417	-0.0031		11.0296	4.42585	-0.062753
88616	21.218	0.4427	-0.0031		11.0703	4.43587	-0.062753
88816	21.296	0.4435	-0.003		11.111	4.44389	-0.0607287
89018	21.372	0.4446	-0.003		11.1507	4.45491	-0.0607287
89219	21.456	0.4456	-0.003		11.1945	4.46493	-0.0607287
89420	21.538	0.4467	-0.003		11.2373	4.47595	-0.0607287
89620	21.612	0.4478	-0.003		11.2759	4.48697	-0.0607287
89820	21.69	0.4486	-0.003		11.3166	4.49499	-0.0607287
90020	21.762	0.4496	-0.003		11.3542	4.50501	-0.0607287
90221	21.84	0.4506	-0.003		11.3949	4.51503	-0.0607287
90422	21.914	0.4515	-0.003		11.4335	4.52405	-0.0607287
90622	21.996	0.4525	-0.003		11.4762	4.53407	-0.0607287
90822	22.08	0.4535	-0.003		11.5201	4.54409	-0.0607287
91022	22.164	0.4547	-0.003		11.5639	4.55611	-0.0607287
91223	22.248	0.4557	-0.003		11.6077	4.56613	-0.0607287
91423	22.328	0.4567	-0.003		11.6495	4.57615	-0.0607287
91624	22.402	0.4576	-0.003		11.6881	4.58517	-0.0607287
91824	22.48	0.4585	-0.0029		11.7288	4.59419	-0.0587045
92024	22.558	0.4595	-0.0029		11.7695	4.60421	-0.0587045
92226	22.638	0.4605	-0.003		11.8112	4.61423	-0.0607287
92427	22.718	0.4615	-0.003		11.8529	4.62425	-0.0607287
92628	22.798	0.4625	-0.003		11.8947	4.63427	-0.0607287
92828	22.874	0.4635	-0.003		11.9343	4.64429	-0.0607287
93028	22.952	0.4646	-0.003		11.975	4.65531	-0.0607287
93228	23.026	0.4655	-0.003		12.0136	4.66433	-0.0607287
93429	23.102	0.4664	-0.0029		12.0533	4.67335	-0.0587045
93630	23.186	0.4673	-0.003		12.0971	4.68236	-0.0607287
93830	23.264	0.4683	-0.0029		12.1378	4.69238	-0.0587045
94030	23.34	0.4693	-0.003		12.1775	4.7024	-0.0607287
94230	23.416	0.4704	-0.003		12.2171	4.71343	-0.0607287
94431	23.496	0.4712	-0.0029		12.2589	4.72144	-0.0587045
94631	23.576	0.4724	-0.0029		12.3006	4.73347	-0.0587045
94832	23.652	0.4733	-0.0029		12.3403	4.74248	-0.0587045
95032	23.736	0.4744	-0.0029		12.3841	4.75351	-0.0587045
95232	23.818	0.4752	-0.0029		12.4269	4.76152	-0.0587045
95434	23.914	0.4763	-0.0029		12.477	4.77255	-0.0587045
95635	24.006	0.4774	-0.0029		12.525	4.78357	-0.0587045
95836	24.088	0.4787	-0.0029		12.5677	4.79659	-0.0587045
96036	24.17	0.4796	-0.0029		12.6105	4.80561	-0.0587045
96236	24.25	0.4807	-0.0028		12.6523	4.81663	-0.0566802
96436	24.328	0.4817	-0.0029		12.693	4.82665	-0.0587045
96637	24.408	0.4825	-0.0029		12.7347	4.83467	-0.0587045
96838	24.486	0.4835	-0.0029		12.7754	4.84469	-0.0587045
97038	24.564	0.4846	-0.0029		12.8161	4.85571	-0.0587045
97238	24.644	0.4856	-0.0029		12.8578	4.86573	-0.0587045
97438	24.722	0.4866	-0.0029		12.8985	4.87575	-0.0587045
97639	24.8	0.4876	-0.0029		12.9392	4.88577	-0.0587045
97839	24.878	0.4886	-0.0028		12.9799	4.89579	-0.0566802
98040	24.958	0.4896	-0.0029		13.0216	4.90581	-0.0587045
98240	25.032	0.4905	-0.0029		13.0603	4.91483	-0.0587045
98440	25.114	0.4915	-0.0029		13.103	4.92485	-0.0587045
98642	25.196	0.4925	-0.0028		13.1458	4.93487	-0.0566802
98843	25.276	0.4937	-0.0028		13.1876	4.94689	-0.0566802
99044	25.352	0.4946	-0.0028		13.2272	4.95591	-0.0566802
99244	25.428	0.4956	-0.0028		13.2669	4.96593	-0.0566802
99444	25.516	0.4966	-0.0028		13.3128	4.97595	-0.0566802
99644	25.6	0.4977	-0.0028		13.3566	4.98697	-0.0566802
99845	25.69	0.4987	-0.0028		13.4036	4.99699	-0.0566802
100046	25.774	0.4997	-0.0028		13.4474	5.00701	-0.0566802
100246	25.85	0.5007	-0.0028		13.487	5.01703	-0.0566802
100446	25.928	0.5018	-0.0028		13.5277	5.02806	-0.0566802
100646	26.006	0.5028	-0.0028		13.5684	5.03808	-0.0566802
100847	26.078	0.5038	-0.0028		13.606	5.0481	-0.0566802
101047	26.152	0.5048	-0.0028		13.6446	5.05812	-0.0566802
101248	26.228	0.5056	-0.0028		13.6843	5.06613	-0.0566802
101448	26.304	0.5066	-0.0028		13.7239	5.07615	-0.0566802
101648	26.384	0.5077	-0.0027		13.7657	5.08717	-0.0546559
101850	26.464	0.5086	-0.0028		13.8074	5.09619	-0.0566802
102051	26.542	0.5096	-0.0028		13.8481	5.10621	-0.0566802
102252	26.618	0.5106	-0.0028		13.8877	5.11623	-0.0566802
102452	26.694	0.5116	-0.0027		13.9274	5.12625	-0.0546559
102652	26.768	0.5126	-0.0028		13.966	5.13627	-0.0566802
102852	26.842	0.5136	-0.0027		14.0046	5.14629	-0.0546559
103053	26.918	0.5145	-0.0027		14.0443	5.15531	-0.0546559
103254	26.994	0.5154	-0.0027		14.0839	5.16433	-0.0546559
103454	27.072	0.5165	-0.0027		14.1246	5.17535	-0.0546559
103654	27.144	0.5175	-0.0028		14.1622	5.18537	-0.0566802
103854	27.224	0.5186	-0.0027		14.2039	5.19639	-0.0546559
104055	27.3	0.5195	-0.0027		14.2436	5.20541	-0.0546559
104255	27.372	0.5205	-0.0027		14.2811	5.21543	-0.0546559
104456	27.448	0.5215	-0.0027		14.3208	5.22545	-0.0546559
104656	27.522	0.5224	-0.0027		14.3594	5.23447	-0.0546559
104856	27.596	0.5232	-0.0027		14.398	5.24248	-0.0546559
105058	27.668	0.5244	-0.0027		14.4356	5.25451	-0.0546559
105259	27.748	0.5252	-0.0026		14.4773	5.26253	-0.0526316
105460	27.824	0.5262	-0.0027		14.517	5.27255	-0.0546559
105660	27.906	0.5273	-0.0026		14.5597	5.28357	-0.0526316
105860	27.982	0.5283	-0.0026		14.5994	5.29359	-0.0526316
106060	28.074	0.5293	-0.0027		14.6474	5.30361	-0.0546559
106261	28.166	0.5304	-0.0026		14.6954	5.31463	-0.0526316
106462	28.258	0.5315	-0.0026		14.7434	5.32565	-0.0526316
106662	28.344	0.5326	-0.0026		14.7883	5.33667	-0.0526316
106862	28.426	0.5337	-0.0026		14.8311	5.3477	-0.0526316
107062	28.504	0.5348	-0.0026		14.8717	5.35872	-0.0526316
107263	28.582	0.5358	-0.0026		14.9124	5.36874	-0.0526316
107463	28.656	0.5368	-0.0026		14.9511	5.37876	-0.0526316
107664	28.728	0.5377	-0.0026		14.9886	5.38778	-0.0526316
107864	28.806	0.5385	-0.0026		15.0293	5.39579	-0.0526316
108064	28.884	0.5396	-0.0025		15.07	5.40681	-0.0506073
108265	28.958	0.5406	-0.0026		15.1086	5.41683	-0.0526316
108465	29.036	0.5416	-0.0026		15.1493	5.42685	-0.0526316
108666	29.11	0.5426	-0.0026		15.1879	5.43687	-0.0526316
108866	29.186	0.5436	-0.0026		15.2276	5.44689	-0.0526316
109066	29.264	0.5445	-0.0026		15.2683	5.45591	-0.0526316
109268	29.342	0.5456	-0.0026		15.309	5.46693	-0.0526316
109469	29.416	0.5464	-0.0026		15.3476	5.47495	-0.0526316
109670	29.492	0.5473	-0.0026		15.3872	5.48397	-0.0526316
109870	29.568	0.5483	-0.0025		15.4269	5.49399	-0.0506073
110070	29.646	0.5495	-0.0026		15.4676	5.50601	-0.0526316
110270	29.722	0.5505	-0.0026		15.5072	5.51603	-0.0526316
110471	29.804	0.5515	-0.0026		15.55	5.52605	-0.0526316
110672	29.882	0.5525	-0.0025		15.5907	5.53607	-0.0506073
110872	29.958	0.5534	-0.0025		15.6304	5.54509	-0.0506073
111072	30.034	0.5544	-0.0026		15.67	5.55511	-0.0526316
111272	30.114	0.5554	-0.0025		15.7118	5.56513	-0.0506073
111473	30.192	0.5565	-0.0026		15.7524	5.57615	-0.0526316
111673	30.266	0.5574	-0.0025		15.7911	5.58517	-0.0506073
111874	30.348	0.5585	-0.0025		15.8338	5.59619	-0.0506073
112074	30.424	0.5593	-0.0025		15.8735	5.60421	-0.0506073
112274	30.502	0.5605	-0.0025		15.9142	5.61623	-0.0506073
112476	30.576	0.5613	-0.0025		15.9528	5.62425	-0.0506073
112677	30.654	0.5622	-0.0025		15.9935	5.63327	-0.0506073
112878	30.738	0.5633	-0.0025		16.0373	5.64429	-0.0506073
113078	30.82	0.5644	-0.0025		16.0801	5.65531	-0.0506073
113278	30.898	0.5653	-0.0025		16.1208	5.66433	-0.0506073
113478	30.974	0.5665	-0.0025		16.1605	5.67635	-0.0506073
113679	31.054	0.5674	-0.0025		16.2022	5.68537	-0.0506073
113880	31.126	0.5684	-0.0024		16.2398	5.69539	-0.048583
114080	31.202	0.5694	-0.0024		16.2794	5.70541	-0.048583
114280	31.276	0.5703	-0.0024		16.318	5.71443	-0.048583
114480	31.356	0.5715	-0.0024		16.3598	5.72645	-0.048583
114681	31.44	0.5724	-0.0024		16.4036	5.73547	-0.048583
114881	31.52	0.5735	-0.0024		16.4453	5.74649	-0.048583
115082	31.6	0.5744	-0.0024		16.4871	5.75551	-0.048583
115282	31.688	0.5756	-0.0024		16.533	5.76754	-0.048583
115482	31.762	0.5765	-0.0024		16.5716	5.77655	-0.048583
115684	31.836	0.5776	-0.0025		16.6102	5.78758	-0.0506073
115885	31.914	0.5785	-0.0024		16.6509	5.79659	-0.048583
116086	32	0.5796	-0.0024		16.6958	5.80762	-0.048583
116286	32.076	0.5806	-0.0024		16.7354	5.81764	-0.048583
116486	32.156	0.5817	-0.0024		16.7772	5.82866	-0.048583
116686	32.23	0.5827	-0.0024		16.8158	5.83868	-0.048583
116887	32.304	0.5836	-0.0024		16.8544	5.8477	-0.048583
117088	32.374	0.5845	-0.0023		16.8909	5.85671	-0.0465587
117288	32.448	0.5857	-0.0023		16.9295	5.86874	-0.0465587
117488	32.52	0.5864	-0.0024		16.9671	5.87575	-0.048583
117688	32.61	0.5876	-0.0023		17.014	5.88778	-0.0465587
117889	32.702	0.5886	-0.0024		17.062	5.8978	-0.048583
118089	32.792	0.5896	-0.0023		17.109	5.90782	-0.0465587
118290	32.872	0.5908	-0.0023		17.1507	5.91984	-0.0465587
118490	32.948	0.5918	-0.0023		17.1904	5.92986	-0.0465587
118690	33.022	0.5927	-0.0022		17.229	5.93888	-0.0445344
118892	33.1	0.5938	-0.0023		17.2697	5.9499	-0.0465587
119093	33.182	0.5948	-0.0023		17.3125	5.95992	-0.0465587
119294	33.258	0.5956	-0.0023		17.3521	5.96794	-0.0465587
119494	33.334	0.5967	-0.0023		17.3918	5.97896	-0.0465587
119694	33.408	0.5977	-0.0023		17.4304	5.98898	-0.0465587
119894	33.48	0.5987	-0.0023		17.4679	5.999	-0.0465587
120095	33.56	0.5996	-0.0023		17.5097	6.00802	-0.0465587
120296	33.632	0.6006	-0.0023		17.5472	6.01804	-0.0465587
120496	33.712	0.6016	-0.0023		17.589	6.02806	-0.0465587
120696	33.788	0.6025	-0.0022		17.6286	6.03707	-0.0445344
120896	33.864	0.6036	-0.0022		17.6683	6.0481	-0.0445344
121097	33.946	0.6046	-0.0022		17.7111	6.05812	-0.0445344
121297	34.02	0.6056	-0.0023		17.7497	6.06814	-0.0465587
121498	34.096	0.6065	-0.0022		17.7893	6.07715	-0.0445344
121698	34.17	0.6075	-0.0022		17.8279	6.08717	-0.0445344
121898	34.244	0.6085	-0.0022		17.8666	6.09719	-0.0445344
122100	34.32	0.6094	-0.0022		17.9062	6.10621	-0.0445344
122301	34.396	0.6104	-0.0022		17.9459	6.11623	-0.0445344
122502	34.47	0.6113	-0.0022		17.9845	6.12525	-0.0445344
122702	34.55	0.6125	-0.0022		18.0262	6.13727	-0.0445344
122902	34.626	0.6135	-0.0022		18.0659	6.14729	-0.0445344
123102	34.702	0.6143	-0.0022		18.1055	6.15531	-0.0445344
123303	34.784	0.6154	-0.0022		18.1483	6.16633	-0.0445344
123504	34.862	0.6164	-0.0022		18.189	6.17635	-0.0445344
123704	34.94	0.6175	-0.0021		18.2297	6.18737	-0.0425101
123904	35.014	0.6184	-0.0022		18.2683	6.19639	-0.0445344
124104	35.092	0.6194	-0.0021		18.309	6.20641	-0.0425101
124305	35.17	0.6204	-0.0021		18.3497	6.21643	-0.0425101
124505	35.248	0.6213	-0.0021		18.3904	6.22545	-0.0425101
124706	35.324	0.6225	-0.0021		18.43	6.23747	-0.0425101
124906	35.396	0.6233	-0.0021		18.4676	6.24549	-0.0425101
125106	35.472	0.6243	-0.0021		18.5073	6.25551	-0.0425101
125308	35.544	0.6254	-0.0021		18.5448	6.26653	-0.0425101
125509	35.626	0.6262	-0.0021		18.5876	6.27455	-0.0425101
125710	35.718	0.6273	-0.0021		18.6356	6.28557	-0.0425101
125910	35.814	0.6286	-0.0021		18.6857	6.2986	-0.0425101
126110	35.898	0.6296	-0.0021		18.7295	6.30862	-0.0425101
126310	35.984	0.6306	-0.0021		18.7744	6.31864	-0.0425101
126511	36.062	0.6317	-0.002		18.8151	6.32966	-0.0404858
126712	36.138	0.6328	-0.0021		18.8547	6.34068	-0.0425101
126912	36.214	0.6337	-0.0021		18.8944	6.3497	-0.0425101
127112	36.288	0.6345	-0.002		18.933	6.35772	-0.0404858
127312	36.37	0.6358	-0.002		18.9758	6.37074	-0.0404858
127513	36.452	0.6367	-0.0021		19.0186	6.37976	-0.0425101
127713	36.532	0.6377	-0.002		19.0603	6.38978	-0.0404858
127914	36.612	0.6388	-0.002		19.102	6.4008	-0.0404858
128114	36.69	0.6398	-0.002		19.1427	6.41082	-0.0404858
128314	36.764	0.6407	-0.002		19.1813	6.41984	-0.0404858
128515	36.838	0.6418	-0.002		19.22	6.43086	-0.0404858
128715	36.91	0.6426	-0.002		19.2575	6.43888	-0.0404858
128916	36.988	0.6436	-0.002		19.2982	6.4489	-0.0404858
129116	37.066	0.6446	-0.002		19.3389	6.45892	-0.0404858
129316	37.138	0.6456	-0.0019		19.3765	6.46894	-0.0384615
129518	37.218	0.6467	-0.002		19.4182	6.47996	-0.0404858
129719	37.298	0.6476	-0.002		19.46	6.48898	-0.0404858
129920	37.37	0.6487	-0.002		19.4975	6.5	-0.0404858
130120	37.442	0.6497	-0.002		19.5351	6.51002	-0.0404858
130320	37.518	0.6505	-0.002		19.5747	6.51804	-0.0404858
130520	37.594	0.6515	-0.0019		19.6144	6.52806	-0.0384615
130721	37.67	0.6526	-0.0019		19.654	6.53908	-0.0384615
130922	37.75	0.6535	-0.0019		19.6958	6.5481	-0.0384615
131122	37.828	0.6546	-0.0019		19.7365	6.55912	-0.0384615
131322	37.904	0.6556	-0.0019		19.7761	6.56914	-0.0384615
131522	37.972	0.6566	-0.0019		19.8116	6.57916	-0.0384615
131723	38.046	0.6576	-0.0019		19.8502	6.58918	-0.0384615
131923	38.112	0.6584	-0.0019		19.8847	6.59719	-0.0384615
132124	38.18	0.6591	-0.0019		19.9201	6.60421	-0.0384615
132324	38.26	0.6602	-0.0019		19.9619	6.61523	-0.0384615
132524	38.344	0.6613	-0.0019		20.0057	6.62625	-0.0384615
132726	38.442	0.6624	-0.0018		20.0568	6.63727	-0.0364372
132927	38.526	0.6634	-0.0019		20.1007	6.64729	-0.0384615
133128	38.61	0.6645	-0.0018		20.1445	6.65832	-0.0364372
133328	38.69	0.6655	-0.0018		20.1862	6.66834	-0.0364372
133528	38.77	0.6665	-0.0018		20.228	6.67836	-0.0364372
133728	38.846	0.6675	-0.0018		20.2676	6.68838	-0.0364372
133929	38.924	0.6685	-0.0018		20.3083	6.6984	-0.0364372
134130	39.002	0.6695	-0.0018		20.349	6.70842	-0.0364372
134330	39.08	0.6705	-0.0018		20.3897	6.71844	-0.0364372
134530	39.156	0.6715	-0.0018		20.4293	6.72846	-0.0364372
134730	39.236	0.6725	-0.0018		20.4711	6.73848	-0.0364372
134931	39.316	0.6735	-0.0017		20.5128	6.7485	-0.034413
135131	39.39	0.6745	-0.0018		20.5514	6.75852	-0.0364372
135332	39.472	0.6756	-0.0018		20.5942	6.76954	-0.0364372
135532	39.548	0.6765	-0.0018		20.6339	6.77856	-0.0364372
135732	39.632	0.6775	-0.0018		20.6777	6.78858	-0.0364372
135934	39.72	0.6787	-0.0018		20.7236	6.8006	-0.0364372
136135	39.8	0.6796	-0.0017		20.7654	6.80962	-0.034413
136336	39.882	0.6808	-0.0017		20.8081	6.82164	-0.034413
136536	39.958	0.6817	-0.0017		20.8478	6.83066	-0.034413
136736	40.036	0.6828	-0.0017		20.8885	6.84168	-0.034413
136936	40.114	0.6836	-0.0017		20.9292	6.8497	-0.034413
137137	40.192	0.6847	-0.0017		20.9699	6.86072	-0.034413
137338	40.268	0.6857	-0.0017		21.0095	6.87074	-0.034413
137538	40.342	0.6867	-0.0016		21.0481	6.88076	-0.0323887
137738	40.414	0.6877	-0.0016		21.0857	6.89078	-0.0323887
137938	40.486	0.6886	-0.0017		21.1233	6.8998	-0.034413
138139	40.564	0.6896	-0.0017		21.164	6.90982	-0.034413
138339	40.638	0.6906	-0.0016		21.2026	6.91984	-0.0323887
138540	40.722	0.6916	-0.0016		21.2464	6.92986	-0.0323887
138740	40.804	0.6927	-0.0016		21.2892	6.94088	-0.0323887
138940	40.886	0.6937	-0.0016		21.332	6.9509	-0.0323887
139142	40.97	0.6947	-0.0016		21.3758	6.96092	-0.0323887
139343	41.046	0.6958	-0.0016		21.4154	6.97194	-0.0323887
139544	41.118	0.6968	-0.0016		21.453	6.98196	-0.0323887
139744	41.2	0.6979	-0.0016		21.4958	6.99299	-0.0323887
139944	41.274	0.6988	-0.0016		21.5344	7.002	-0.0323887
140144	41.348	0.6997	-0.0015		21.573	7.01102	-0.0303644
140345	41.42	0.7007	-0.0016		21.6106	7.02104	-0.0323887
140546	41.496	0.7017	-0.0015		21.6502	7.03106	-0.0303644
140746	41.572	0.7027	-0.0015		21.6899	7.04108	-0.0303644
140946	41.648	0.7038	-0.0015		21.7295	7.0521	-0.0303644
141146	41.724	0.7046	-0.0015		21.7692	7.06012	-0.0303644
141347	41.798	0.7057	-0.0014		21.8078	7.07114	-0.0283401
141547	41.876	0.7065	-0.0015		21.8485	7.07916	-0.0303644
141748	41.954	0.7076	-0.0015		21.8892	7.09018	-0.0303644
141948	42.03	0.7085	-0.0015		21.9288	7.0992	-0.0303644
142148	42.108	0.7096	-0.0014		21.9695	7.11022	-0.0283401
142350	42.182	0.7106	-0.0014		22.0081	7.12024	-0.0283401
142551	42.258	0.7115	-0.0014		22.0478	7.12926	-0.0283401
142752	42.33	0.7125	-0.0014		22.0854	7.13928	-0.0283401
142952	42.408	0.7135	-0.0014		22.1261	7.1493	-0.0283401
143152	42.478	0.7145	-0.0014		22.1626	7.15932	-0.0283401
143352	42.552	0.7154	-0.0013		22.2012	7.16834	-0.0263158
143553	42.634	0.7165	-0.0014		22.244	7.17936	-0.0283401
143754	42.71	0.7175	-0.0014		22.2836	7.18938	-0.0283401
143954	42.79	0.7185	-0.0013		22.3254	7.1994	-0.0263158
144154	42.868	0.7196	-0.0013		22.3661	7.21042	-0.0263158
144354	42.95	0.7206	-0.0013		22.4088	7.22044	-0.0263158
144555	43.03	0.7217	-0.0013		22.4506	7.23146	-0.0263158
144755	43.11	0.7226	-0.0013		22.4923	7.24048	-0.0263158
144956	43.19	0.7235	-0.0012		22.5341	7.2495	-0.0242915
145156	43.274	0.7246	-0.0012		22.5779	7.26052	-0.0242915
145356	43.348	0.7256	-0.0013		22.6165	7.27054	-0.0263158
145558	43.426	0.7266	-0.0012		22.6572	7.28056	-0.0242915
145759	43.506	0.7277	-0.0013		22.6989	7.29158	-0.0263158
145960	43.576	0.7288	-0.0012		22.7355	7.30261	-0.0242915
146160	43.654	0.7298	-0.0012		22.7761	7.31263	-0.0242915
146360	43.726	0.7308	-0.0012		22.8137	7.32265	-0.0242915
146560	43.806	0.7316	-0.0012		22.8555	7.33066	-0.0242915
146761	43.88	0.7326	-0.0012		22.8941	7.34068	-0.0242915
146962	43.95	0.7336	-0.0012		22.9306	7.3507	-0.0242915
147162	44.026	0.7346	-0.0011		22.9702	7.36072	-0.0222672
147362	44.098	0.7355	-0.0012		23.0078	7.36974	-0.0242915
147562	44.172	0.7367	-0.0012		23.0464	7.38176	-0.0242915
147763	44.244	0.7375	-0.0011		23.084	7.38978	-0.0222672
147963	44.318	0.7385	-0.0011		23.1226	7.3998	-0.0222672
148164	44.392	0.7394	-0.0011		23.1612	7.40882	-0.0222672
148364	44.468	0.7403	-0.0011		23.2008	7.41784	-0.0222672
148564	44.54	0.7414	-0.0011		23.2384	7.42886	-0.0222672
148765	44.62	0.7425	-0.0011		23.2802	7.43988	-0.0222672
148965	44.698	0.7433	-0.0011		23.3208	7.4479	-0.0222672
149166	44.78	0.7445	-0.001		23.3636	7.45992	-0.0202429
149366	44.86	0.7453	-0.0011		23.4054	7.46794	-0.0222672
149566	44.938	0.7465	-0.001		23.4461	7.47996	-0.0202429
149768	45.016	0.7474	-0.001		23.4868	7.48898	-0.0202429
149969	45.102	0.7485	-0.001		23.5316	7.5	-0.0202429
150170	45.182	0.7494	-0.001		23.5734	7.50902	-0.0202429
150370	45.262	0.7506	-0.001		23.6151	7.52104	-0.0202429
150570	45.336	0.7515	-0.0009		23.6537	7.53006	-0.0182186
150770	45.412	0.7527	-0.001		23.6934	7.54208	-0.0202429
150971	45.496	0.7536	-0.0009		23.7372	7.5511	-0.0182186
151172	45.57	0.7547	-0.0009		23.7758	7.56212	-0.0182186
151372	45.642	0.7556	-0.0009		23.8134	7.57114	-0.0182186
151572	45.72	0.7565	-0.0009		23.8541	7.58016	-0.0182186
151772	45.794	0.7576	-0.0009		23.8927	7.59118	-0.0182186
151973	45.866	0.7584	-0.0009		23.9302	7.5992	-0.0182186
152173	45.938	0.7594	-0.0009		23.9678	7.60922	-0.0182186
152374	46.01	0.7603	-0.0009		24.0054	7.61824	-0.0182186
152574	46.09	0.7614	-0.0009		24.0471	7.62926	-0.0182186
152774	46.168	0.7625	-0.0009		24.0878	7.64028	-0.0182186
152976	46.25	0.7635	-0.0009		24.1306	7.6503	-0.0182186
153177	46.334	0.7645	-0.0009		24.1744	7.66032	-0.0182186
153378	46.41	0.7656	-0.0009		24.2141	7.67134	-0.0182186
153578	46.486	0.7667	-0.0008		24.2537	7.68236	-0.0161943
153778	46.566	0.7676	-0.0008		24.2955	7.69138	-0.0161943
153978	46.636	0.7686	-0.0008		24.332	7.7014	-0.0161943
154179	46.714	0.7696	-0.0008		24.3727	7.71142	-0.0161943
154380	46.79	0.7707	-0.0008		24.4123	7.72244	-0.0161943
154580	46.868	0.7718	-0.0008		24.453	7.73347	-0.0161943
154780	46.952	0.7727	-0.0008		24.4969	7.74248	-0.0161943
154980	47.034	0.7738	-0.0007		24.5396	7.75351	-0.01417
155181	47.114	0.7748	-0.0007		24.5814	7.76353	-0.01417
155381	47.192	0.7759	-0.0007		24.6221	7.77455	-0.01417
155582	47.266	0.7768	-0.0007		24.6607	7.78357	-0.01417
155782	47.336	0.7779	-0.0007		24.6972	7.79459	-0.01417
155982	47.406	0.7788	-0.0006		24.7337	7.80361	-0.0121457
156184	47.476	0.7798	-0.0006		24.7702	7.81363	-0.0121457
156385	47.548	0.7806	-0.0007		24.8078	7.82164	-0.01417
156586	47.624	0.7818	-0.0007		24.8475	7.83367	-0.01417
156786	47.7	0.7828	-0.0006		24.8871	7.84369	-0.0121457
156986	47.774	0.7838	-0.0006		24.9257	7.85371	-0.0121457
157186	47.848	0.7848	-0.0006		24.9643	7.86373	-0.0121457
157387	47.918	0.7858	-0.0006		25.0009	7.87375	-0.0121457
157588	47.986	0.7867	-0.0006		25.0363	7.88277	-0.0121457
157788	48.058	0.7876	-0.0006		25.0739	7.89178	-0.0121457
157988	48.13	0.7887	-0.0006		25.1115	7.90281	-0.0121457
158188	48.206	0.7895	-0.0005		25.1511	7.91082	-0.0101215
158389	48.282	0.7906	-0.0005		25.1908	7.92184	-0.0101215
158589	48.356	0.7917	-0.0005		25.2294	7.93287	-0.0101215
158790	48.428	0.7927	-0.0005		25.2669	7.94289	-0.0101215
158990	48.5	0.7937	-0.0005		25.3045	7.95291	-0.0101215
159190	48.572	0.7946	-0.0005		25.3421	7.96192	-0.0101215
159392	48.646	0.7956	-0.0005		25.3807	7.97194	-0.0101215
159593	48.718	0.7967	-0.0005		25.4183	7.98297	-0.0101215
159794	48.794	0.7975	-0.0004		25.4579	7.99098	-0.00809717
159994	48.88	0.7986	-0.0004		25.5028	8.002	-0.00809717
160194	48.964	0.7996	-0.0004		25.5466	8.01202	-0.00809717
160394	49.046	0.8007	-0.0004		25.5894	8.02305	-0.00809717
160595	49.118	0.8019	-0.0004		25.6269	8.03507	-0.00809717
160796	49.196	0.8027	-0.0004		25.6676	8.04309	-0.00809717
160996	49.266	0.8036	-0.0004		25.7042	8.0521	-0.00809717
161196	49.336	0.8048	-0.0003		25.7407	8.06413	-0.00607287
161396	49.41	0.8057	-0.0003		25.7793	8.07315	-0.00607287
161597	49.482	0.8066	-0.0003		25.8169	8.08216	-0.00607287
161797	49.556	0.8077	-0.0003		25.8555	8.09319	-0.00607287
161998	49.63	0.8087	-0.0003		25.8941	8.10321	-0.00607287
162198	49.7	0.8096	-0.0003		25.9306	8.11222	-0.00607287
162398	49.768	0.8106	-0.0003		25.9661	8.12224	-0.00607287
162600	49.838	0.8117	-0.0003		26.0026	8.13327	-0.00607287
162801	49.912	0.8127	-0.0003		26.0412	8.14329	-0.00607287
163002	49.984	0.8136	-0.0002		26.0788	8.1523	-0.00404858
163202	50.058	0.8145	-0.0002		26.1174	8.16132	-0.00404858
163402	50.138	0.8155	-0.0002		26.1591	8.17134	-0.00404858
163602	50.212	0.8166	-0.0002		26.1977	8.18236	-0.00404858
163803	50.292	0.8176	-0.0001		26.2395	8.19238	-0.00202429
164004	50.362	0.8186	-0.0002		26.276	8.2024	-0.00404858
164204	50.432	0.8197	-0.0002		26.3125	8.21343	-0.00404858
164404	50.504	0.8206	-0.0001		26.3501	8.22244	-0.00202429
164604	50.58	0.8216	-0.0001		26.3897	8.23246	-0.00202429
164805	50.656	0.8225	-0.0001		26.4294	8.24148	-0.00202429
165005	50.738	0.8236	-0.0001		26.4722	8.25251	-0.00202429
165206	50.818	0.8247	-0.0001		26.5139	8.26353	-0.00202429
165406	50.894	0.8257	-0.0001		26.5536	8.27355	-0.00202429
165606	50.97	0.8269	0		26.5932	8.28557	0
165808	51.042	0.8277	0		26.6308	8.29359	0
166009	51.114	0.8288	0		26.6683	8.30461	0
166210	51.182	0.8297	0		26.7038	8.31363	0
166410	51.254	0.8306	0		26.7414	8.32265	0
166610	51.326	0.8316	0		26.779	8.33267	0
166810	51.396	0.8326	0.0001		26.8155	8.34269	0.00202429
167011	51.47	0.8336	0		26.8541	8.35271	0
167212	51.536	0.8346	0		26.8885	8.36273	0
167412	51.608	0.8357	0		26.9261	8.37375	0
167612	51.68	0.8366	0.0001		26.9637	8.38277	0.00202429
167812	51.752	0.8376	0.0001		27.0012	8.39279	0.00202429
168013	51.82	0.8386	0.0001		27.0367	8.40281	0.00202429
168213	51.892	0.8396	0.0001		27.0743	8.41283	0.00202429
168414	51.966	0.8405	0.0002		27.1129	8.42184	0.00404858
168614	52.038	0.8415	0.0001		27.1504	8.43186	0.00202429
168814	52.114	0.8425	0.0001		27.1901	8.44188	0.00202429
169015	52.188	0.8436	0.0002		27.2287	8.45291	0.00404858
169215	52.26	0.8446	0.0002		27.2663	8.46293	0.00404858
169416	52.332	0.8455	0.0002		27.3038	8.47194	0.00404858
169616	52.408	0.8466	0.0002		27.3435	8.48297	0.00404858
169816	52.48	0.8475	0.0003		27.381	8.49198	0.00607287
170018	52.55	0.8486	0.0003		27.4176	8.50301	0.00607287
170219	52.62	0.8497	0.0002		27.4541	8.51403	0.00404858
170420	52.696	0.8506	0.0003		27.4937	8.52305	0.00607287
170620	52.766	0.8517	0.0003		27.5303	8.53407	0.00607287
170820	52.84	0.8527	0.0003		27.5689	8.54409	0.00607287
171020	52.918	0.8537	0.0003		27.6096	8.55411	0.00607287
171221	52.99	0.8547	0.0003		27.6471	8.56413	0.00607287
171422	53.062	0.8558	0.0003		27.6847	8.57515	0.00607287
171622	53.128	0.8566	0.0004		27.7191	8.58317	0.00809717
171822	53.206	0.8577	0.0004		27.7598	8.59419	0.00809717
172022	53.28	0.8587	0.0004		27.7984	8.60421	0.00809717
172223	53.356	0.8598	0.0004		27.8381	8.61523	0.00809717
172423	53.424	0.8608	0.0004		27.8736	8.62525	0.00809717
172624	53.498	0.8617	0.0004		27.9122	8.63427	0.00809717
172824	53.566	0.8627	0.0005		27.9477	8.64429	0.0101215
173024	53.634	0.8637	0.0005		27.9831	8.65431	0.0101215
173226	53.706	0.8647	0.0005		28.0207	8.66433	0.0101215
173427	53.776	0.8655	0.0005		28.0572	8.67234	0.0101215
173628	53.846	0.8665	0.0005		28.0937	8.68236	0.0101215
173828	53.92	0.8676	0.0005		28.1324	8.69339	0.0101215
174028	54	0.8688	0.0005		28.1741	8.70541	0.0101215
174228	54.086	0.8699	0.0005		28.219	8.71643	0.0101215
174429	54.162	0.8709	0.0005		28.2586	8.72645	0.0101215
174630	54.24	0.8721	0.0006		28.2993	8.73848	0.0121457
174830	54.308	0.873	0.0006		28.3348	8.74749	0.0121457
175030	54.374	0.8741	0.0006		28.3692	8.75852	0.0121457
175230	54.444	0.8748	0.0006		28.4057	8.76553	0.0121457
175431	54.514	0.876	0.0007		28.4423	8.77756	0.01417
175631	54.58	0.8769	0.0007		28.4767	8.78657	0.01417
175832	54.644	0.8778	0.0007		28.5101	8.79559	0.01417
176032	54.71	0.879	0.0007		28.5445	8.80762	0.01417
176232	54.78	0.8799	0.0007		28.5811	8.81663	0.01417
176434	54.848	0.8808	0.0007		28.6165	8.82565	0.01417
176635	54.914	0.8818	0.0008		28.651	8.83567	0.0161943
176836	54.984	0.8828	0.0008		28.6875	8.84569	0.0161943
177036	55.054	0.8838	0.0008		28.724	8.85571	0.0161943
177236	55.122	0.8847	0.0008		28.7595	8.86473	0.0161943
177436	55.192	0.8858	0.0008		28.796	8.87575	0.0161943
177637	55.26	0.8867	0.0008		28.8315	8.88477	0.0161943
177838	55.326	0.8877	0.0008		28.8659	8.89479	0.0161943
178038	55.386	0.8887	0.0009		28.8972	8.90481	0.0182186
178238	55.452	0.8897	0.0009		28.9317	8.91483	0.0182186
178438	55.516	0.8906	0.0009		28.9651	8.92385	0.0182186
178639	55.594	0.8917	0.0009		29.0058	8.93487	0.0182186
178839	55.686	0.8927	0.0009		29.0538	8.94489	0.0182186
179040	55.78	0.894	0.0009		29.1028	8.95792	0.0182186
179240	55.862	0.895	0.0008		29.1456	8.96794	0.0161943
179440	55.934	0.896	0.001		29.1831	8.97796	0.0202429
179642	56.01	0.8971	0.001		29.2228	8.98898	0.0202429
179843	56.08	0.8981	0.0009		29.2593	8.999	0.0182186
180044	56.146	0.899	0.001		29.2938	9.00802	0.0202429
180244	56.218	0.9001	0.0011		29.3313	9.01904	0.0222672
180444	56.284	0.901	0.0011		29.3658	9.02806	0.0222672
180644	56.35	0.9021	0.0011		29.4002	9.03908	0.0222672
180845	56.418	0.9031	0.001		29.4357	9.0491	0.0202429
181046	56.486	0.904	0.0011		29.4711	9.05812	0.0222672
181246	56.554	0.9051	0.0011		29.5066	9.06914	0.0222672
181446	56.616	0.906	0.0011		29.539	9.07816	0.0222672
181646	56.686	0.9069	0.0011		29.5755	9.08717	0.0222672
181847	56.754	0.9079	0.0012		29.611	9.09719	0.0242915
182047	56.822	0.9089	0.0011		29.6465	9.10721	0.0222672
182248	56.886	0.9099	0.0011		29.6798	9.11723	0.0222672
182448	56.958	0.9109	0.0012		29.7174	9.12725	0.0242915
182648	57.024	0.9118	0.0012		29.7518	9.13627	0.0242915
182850	57.094	0.9128	0.0011		29.7884	9.14629	0.0222672
183051	57.154	0.9138	0.0011		29.8197	9.15631	0.0222672
183252	57.222	0.9147	0.0012		29.8551	9.16533	0.0242915
183452	57.284	0.9159	0.0012		29.8875	9.17735	0.0242915
183652	57.35	0.9169	0.0012		29.9219	9.18737	0.0242915
183852	57.416	0.9177	0.0012		29.9564	9.19539	0.0242915
184053	57.476	0.9188	0.0012		29.9877	9.20641	0.0242915
184254	57.54	0.9196	0.0011		30.0211	9.21443	0.0222672
184454	57.61	0.9207	0.0012		30.0576	9.22545	0.0242915
184654	57.678	0.9216	0.0012		30.0931	9.23447	0.0242915
184854	57.75	0.9226	0.0012		30.1306	9.24449	0.0242915
185055	57.846	0.9238	0.0012		30.1807	9.25651	0.0242915
185255	57.94	0.925	0.0013		30.2298	9.26854	0.0263158
185456	58.022	0.926	0.0013		30.2725	9.27856	0.0263158
185656	58.094	0.9272	0.0012		30.3101	9.29058	0.0242915
185856	58.17	0.9281	0.0012		30.3498	9.2996	0.0242915
186058	58.246	0.9291	0.0012		30.3894	9.30962	0.0242915
186259	58.318	0.9303	0.0013		30.427	9.32164	0.0263158
186460	58.388	0.9312	0.0013		30.4635	9.33066	0.0263158
186660	58.452	0.9322	0.0012		30.4969	9.34068	0.0242915
186860	58.516	0.9332	0.0012		30.5303	9.3507	0.0242915
187060	58.582	0.9342	0.0013		30.5647	9.36072	0.0263158
187261	58.644	0.9351	0.0013		30.5971	9.36974	0.0263158
187462	58.712	0.9361	0.0013		30.6325	9.37976	0.0263158
187662	58.776	0.937	0.0013		30.6659	9.38878	0.0263158
187862	58.836	0.9379	0.0013		30.6972	9.3978	0.0263158
188062	58.902	0.9389	0.0013		30.7317	9.40782	0.0263158
188263	58.97	0.94	0.0013		30.7672	9.41884	0.0263158
188463	59.03	0.9409	0.0013		30.7985	9.42786	0.0263158
188664	59.098	0.942	0.0013		30.8339	9.43888	0.0263158
188864	59.166	0.9429	0.0013		30.8694	9.4479	0.0263158
189064	59.23	0.9438	0.0013		30.9028	9.45691	0.0263158
189265	59.292	0.9449	0.0013		30.9352	9.46794	0.0263158
189465	59.358	0.9458	0.0014		30.9696	9.47695	0.0283401
189666	59.424	0.9467	0.0013		31.004	9.48597	0.0263158
189866	59.49	0.9478	0.0014		31.0385	9.49699	0.0283401
190066	59.562	0.9488	0.0013		31.076	9.50701	0.0263158
190268	59.638	0.9499	0.0014		31.1157	9.51804	0.0283401
190469	59.708	0.9509	0.0014		31.1522	9.52806	0.0283401
190670	59.776	0.9519	0.0013		31.1877	9.53808	0.0263158
190870	59.842	0.9529	0.0014		31.2221	9.5481	0.0283401
191070	59.912	0.9539	0.0014		31.2586	9.55812	0.0283401
191270	59.978	0.955	0.0014		31.2931	9.56914	0.0283401
191471	60.044	0.9558	0.0014		31.3275	9.57715	0.0283401
191672	60.11	0.9568	0.0014		31.3619	9.58717	0.0283401
191872	60.178	0.9578	0.0014		31.3974	9.59719	0.0283401
192072	60.244	0.9588	0.0014		31.4319	9.60721	0.0283401
192272	60.308	0.9597	0.0014		31.4652	9.61623	0.0283401
192473	60.374	0.9608	0.0014		31.4997	9.62725	0.0283401
192673	60.436	0.9617	0.0014		31.532	9.63627	0.0283401
192874	60.502	0.9627	0.0014		31.5665	9.64629	0.0283401
193074	60.566	0.9638	0.0014		31.5999	9.65731	0.0283401
193274	60.622	0.9647	0.0014		31.6291	9.66633	0.0283401
193476	60.694	0.9655	0.0014		31.6666	9.67435	0.0283401
193677	60.762	0.9667	0.0014		31.7021	9.68637	0.0283401
193878	60.832	0.9676	0.0014		31.7386	9.69539	0.0283401
194078	60.894	0.9686	0.0014		31.771	9.70541	0.0283401
194278	60.962	0.9696	0.0014		31.8065	9.71543	0.0283401
194478	61.026	0.9706	0.0014		31.8399	9.72545	0.0283401
194679	61.088	0.9715	0.0014		31.8722	9.73447	0.0283401
194880	61.15	0.9726	0.0014		31.9046	9.74549	0.0283401
195080	61.226	0.9737	0.0014		31.9442	9.75651	0.0283401
195280	61.304	0.9747	0.0015		31.9849	9.76653	0.0303644
195480	61.382	0.9757	0.0015		32.0256	9.77655	0.0303644
195681	61.452	0.9768	0.0014		32.0621	9.78758	0.0283401
195881	61.52	0.9778	0.0015		32.0976	9.7976	0.0303644
196082	61.584	0.9788	0.0015		32.131	9.80762	0.0303644
196282	61.646	0.9797	0.0015		32.1633	9.81663	0.0303644
196482	61.71	0.9809	0.0015		32.1967	9.82866	0.0303644
196684	61.764	0.9819	0.0014		32.2249	9.83868	0.0283401
196885	61.82	0.9829	0.0015		32.2541	9.8487	0.0303644
197086	61.876	0.9836	0.0014		32.2833	9.85571	0.0283401
197286	61.938	0.9848	0.0014		32.3157	9.86774	0.0283401
197486	62.002	0.9856	0.0014		32.3491	9.87575	0.0283401
197686	62.066	0.9868	0.0014		32.3825	9.88778	0.0283401
197887	62.12	0.9877	0.0013		32.4106	9.89679	0.0263158
198088	62.178	0.9886	0.0013		32.4409	9.90581	0.0263158
198288	62.246	0.9897	0.0013		32.4764	9.91683	0.0263158
198488	62.31	0.9906	0.0013		32.5098	9.92585	0.0263158
198688	62.374	0.9916	0.0012		32.5432	9.93587	0.0242915
198889	62.444	0.9926	0.0012		32.5797	9.94589	0.0242915
199089	62.52	0.9937	0.0012		32.6193	9.95691	0.0242915
199290	62.59	0.9947	0.0012		32.6559	9.96693	0.0242915
199490	62.664	0.9957	0.0012		32.6945	9.97695	0.0242915
199690	62.732	0.9968	0.0013		32.73	9.98798	0.0263158
199892	62.8	0.9977	0.0012		32.7654	9.99699	0.0242915
200093	62.86	0.9988	0.0012		32.7967	10.008	0.0242915
200294	62.928	0.9999	0.0013		32.8322	10.019	0.0263158
200494	62.986	1.0008	0.0013		32.8625	10.0281	0.0263158
200694	63.048	1.0019	0.0014		32.8948	10.0391	0.0283401
200894	63.114	1.0029	0.0014		32.9293	10.0491	0.0283401
201095	63.176	1.0038	0.0014		32.9616	10.0581	0.0283401
201296	63.248	1.0048	0.0015		32.9992	10.0681	0.0303644
201496	63.312	1.0059	0.0014		33.0326	10.0792	0.0283401
201696	63.376	1.0068	0.0014		33.066	10.0882	0.0283401
201896	63.432	1.0078	0.0014		33.0952	10.0982	0.0283401
202097	63.492	1.0087	0.0014		33.1265	10.1072	0.0283401
202297	63.554	1.0097	0.0014		33.1588	10.1172	0.0283401
202498	63.616	1.0107	0.0015		33.1912	10.1273	0.0303644
202698	63.676	1.0118	0.0014		33.2225	10.1383	0.0283401
202898	63.736	1.0128	0.0015		33.2538	10.1483	0.0303644
203100	63.798	1.0135	0.0015		33.2861	10.1553	0.0303644
203301	63.86	1.0146	0.0014		33.3185	10.1663	0.0283401
203502	63.918	1.0157	0.0015		33.3487	10.1774	0.0303644
203702	63.986	1.0166	0.0015		33.3842	10.1864	0.0303644
203902	64.054	1.0176	0.0015		33.4197	10.1964	0.0303644
204102	64.124	1.0187	0.0015		33.4562	10.2074	0.0303644
204303	64.194	1.0197	0.0015		33.4927	10.2174	0.0303644
204504	64.266	1.0207	0.0015		33.5303	10.2275	0.0303644
204704	64.328	1.0218	0.0014		33.5627	10.2385	0.0283401
204904	64.394	1.0226	0.0015		33.5971	10.2465	0.0303644
205104	64.458	1.0238	0.0015		33.6305	10.2585	0.0303644
205305	64.522	1.0248	0.0015		33.6639	10.2685	0.0303644
205505	64.586	1.0257	0.0014		33.6973	10.2776	0.0283401
205706	64.646	1.0267	0.0015		33.7286	10.2876	0.0303644
205906	64.71	1.0277	0.0015		33.762	10.2976	0.0303644
206106	64.766	1.0287	0.0014		33.7912	10.3076	0.0283401
206308	64.832	1.0298	0.0015		33.8256	10.3186	0.0303644
206509	64.886	1.0307	0.0015		33.8538	10.3277	0.0303644
206710	64.948	1.0316	0.0015		33.8861	10.3367	0.0303644
206910	65.004	1.0326	0.0016		33.9153	10.3467	0.0323887
207110	65.07	1.0336	0.0015		33.9498	10.3567	0.0303644
207310	65.14	1.0346	0.0015		33.9863	10.3667	0.0303644
207511	65.21	1.0357	0.0015		34.0228	10.3778	0.0303644
207712	65.272	1.0367	0.0015		34.0552	10.3878	0.0303644
207912	65.336	1.0377	0.0016		34.0886	10.3978	0.0323887
208112	65.396	1.0389	0.0015		34.1199	10.4098	0.0303644
208312	65.458	1.0398	0.0016		34.1522	10.4188	0.0323887
208513	65.514	1.0408	0.0015		34.1814	10.4289	0.0303644
208713	65.58	1.0418	0.0015		34.2159	10.4389	0.0303644
208914	65.64	1.0427	0.0014		34.2472	10.4479	0.0283401
209114	65.704	1.0437	0.0016		34.2806	10.4579	0.0323887
209314	65.768	1.0447	0.0015		34.314	10.4679	0.0303644
209515	65.836	1.0457	0.0015		34.3494	10.478	0.0303644
209715	65.896	1.0467	0.0015		34.3807	10.488	0.0303644
209916	65.96	1.0477	0.0015		34.4141	10.498	0.0303644
210116	66.016	1.049	0.0014		34.4434	10.511	0.0283401
210316	66.076	1.0497	0.0015		34.4747	10.518	0.0303644
210518	66.134	1.0508	0.0015		34.5049	10.5291	0.0303644
210719	66.192	1.0517	0.0015		34.5352	10.5381	0.0303644
210920	66.256	1.0526	0.0015		34.5686	10.5471	0.0303644
211120	66.324	1.0538	0.0014		34.6041	10.5591	0.0283401
211320	66.388	1.0547	0.0015		34.6374	10.5681	0.0303644
211520	66.448	1.0557	0.0015		34.6687	10.5782	0.0303644
211721	66.512	1.0567	0.0015		34.7021	10.5882	0.0303644
211922	66.57	1.0578	0.0015		34.7324	10.5992	0.0303644
212122	66.626	1.0587	0.0015		34.7616	10.6082	0.0303644
212322	66.688	1.0597	0.0015		34.794	10.6182	0.0303644
212522	66.746	1.0607	0.0015		34.8242	10.6283	0.0303644
212723	66.804	1.0617	0.0015		34.8545	10.6383	0.0303644
212923	66.86	1.0627	0.0015		34.8837	10.6483	0.0303644
213124	66.922	1.0637	0.0015		34.9161	10.6583	0.0303644
213324	66.984	1.0646	0.0015		34.9484	10.6673	0.0303644
213524	67.044	1.0657	0.0015		34.9797	10.6784	0.0303644
213726	67.102	1.0667	0.0016		35.01	10.6884	0.0323887
213927	67.158	1.0676	0.0015		35.0392	10.6974	0.0303644
214128	67.222	1.0686	0.0015		35.0726	10.7074	0.0303644
214328	67.282	1.0696	0.0015		35.1039	10.7174	0.0303644
214528	67.34	1.0706	0.0016		35.1341	10.7275	0.0323887
214728	67.398	1.0716	0.0016		35.1644	10.7375	0.0323887
214929	67.462	1.0726	0.0015		35.1978	10.7475	0.0303644
215130	67.532	1.0737	0.0015		35.2343	10.7585	0.0303644
215330	67.604	1.0746	0.0015		35.2719	10.7675	0.0303644
215530	67.672	1.0758	0.0015		35.3074	10.7796	0.0303644
215730	67.736	1.0768	0.0016		35.3408	10.7896	0.0323887
215931	67.796	1.078	0.0016		35.3721	10.8016	0.0323887
216131	67.854	1.0789	0.0014		35.4023	10.8106	0.0283401
216332	67.91	1.0798	0.0014		35.4315	10.8196	0.0283401
216532	67.966	1.0808	0.0015		35.4608	10.8297	0.0303644
216732	68.026	1.0818	0.0015		35.4921	10.8397	0.0303644
216934	68.086	1.0828	0.0015		35.5234	10.8497	0.0303644
217135	68.146	1.0837	0.0015		35.5547	10.8587	0.0303644
217336	68.21	1.0847	0.0015		35.5881	10.8687	0.0303644
217536	68.27	1.0857	0.0015		35.6194	10.8788	0.0303644
217736	68.326	1.0867	0.0015		35.6486	10.8888	0.0303644
217936	68.388	1.0877	0.0016		35.6809	10.8988	0.0323887
218137	68.448	1.0888	0.0015		35.7122	10.9098	0.0303644
218338	68.51	1.0898	0.0015		35.7446	10.9198	0.0303644
218538	68.568	1.091	0.0015		35.7748	10.9319	0.0303644
218738	68.624	1.0919	0.0016		35.8041	10.9409	0.0323887
218938	68.678	1.0928	0.0015		35.8322	10.9499	0.0303644
219139	68.74	1.0939	0.0015		35.8646	10.9609	0.0303644
219339	68.796	1.0947	0.0015		35.8938	10.9689	0.0303644
219540	68.854	1.0957	0.0016		35.9241	10.979	0.0323887
219740	68.916	1.0968	0.0015		35.9564	10.99	0.0303644
219940	68.972	1.0978	0.0015		35.9856	11	0.0303644
220142	69.03	1.0987	0.0015		36.0159	11.009	0.0303644
220343	69.086	1.0998	0.0016		36.0451	11.02	0.0323887
220544	69.14	1.1008	0.0015		36.0733	11.0301	0.0303644
220744	69.198	1.1018	0.0015		36.1035	11.0401	0.0303644
220944	69.252	1.1027	0.0016		36.1317	11.0491	0.0323887
221144	69.31	1.1037	0.0016		36.162	11.0591	0.0323887
221345	69.36	1.1048	0.0015		36.1881	11.0701	0.0303644
221546	69.424	1.1057	0.0016		36.2215	11.0792	0.0323887
221746	69.482	1.1066	0.0015		36.2517	11.0882	0.0303644
221946	69.54	1.1078	0.0015		36.282	11.1002	0.0303644
222146	69.6	1.1088	0.0016		36.3133	11.1102	0.0323887
222347	69.658	1.1098	0.0016		36.3435	11.1202	0.0323887
222547	69.716	1.1107	0.0015		36.3738	11.1293	0.0303644
222748	69.77	1.1118	0.0016		36.402	11.1403	0.0323887
222948	69.836	1.1127	0.0015		36.4364	11.1493	0.0303644
223148	69.896	1.1138	0.0016		36.4677	11.1603	0.0323887
223350	69.958	1.1148	0.0016		36.5001	11.1703	0.0323887
223551	70.016	1.1158	0.0015		36.5303	11.1804	0.0303644
223752	70.068	1.1169	0.0015		36.5575	11.1914	0.0303644
223952	70.124	1.1179	0.0016		36.5867	11.2014	0.0323887
224152	70.18	1.1188	0.0015		36.6159	11.2104	0.0303644
224352	70.236	1.1198	0.0015		36.6451	11.2204	0.0303644
224553	70.292	1.1209	0.0016		36.6743	11.2315	0.0323887
224754	70.346	1.1218	0.0015		36.7025	11.2405	0.0303644
224954	70.422	1.1229	0.0016		36.7422	11.2515	0.0323887
225154	70.49	1.124	0.0015		36.7776	11.2625	0.0303644
225354	70.548	1.125	0.0016		36.8079	11.2725	0.0323887
225555	70.606	1.1261	0.0016		36.8382	11.2836	0.0323887
225755	70.662	1.127	0.0015		36.8674	11.2926	0.0303644
225956	70.722	1.1281	0.0016		36.8987	11.3036	0.0323887
226156	70.776	1.1291	0.0015		36.9268	11.3136	0.0303644
226356	70.832	1.13	0.0015		36.9561	11.3226	0.0303644
226558	70.884	1.131	0.0015		36.9832	11.3327	0.0303644
226759	70.94	1.132	0.0015		37.0124	11.3427	0.0303644
226960	70.99	1.133	0.0015		37.0385	11.3527	0.0303644
227160	71.042	1.1341	0.0015		37.0656	11.3637	0.0303644
227360	71.096	1.135	0.0015		37.0938	11.3727	0.0303644
227560	71.148	1.1362	0.0015		37.1209	11.3848	0.0303644
227761	71.2	1.137	0.0016		37.1481	11.3928	0.0323887
227962	71.25	1.1379	0.0015		37.1742	11.4018	0.0303644
228162	71.306	1.1388	0.0015		37.2034	11.4108	0.0303644
228362	71.362	1.1399	0.0015		37.2326	11.4218	0.0303644
228562	71.424	1.141	0.0015		37.2649	11.4329	0.0303644
228763	71.476	1.1419	0.0016		37.2921	11.4419	0.0323887
228963	71.526	1.1431	0.0015		37.3182	11.4539	0.0303644
229164	71.576	1.144	0.0015		37.3442	11.4629	0.0303644
229364	71.634	1.1449	0.0013		37.3745	11.4719	0.0263158
229564	71.682	1.146	0.0016		37.3995	11.483	0.0323887
229765	71.736	1.1469	0.0016		37.4277	11.492	0.0323887
229965	71.788	1.1479	0.0016		37.4549	11.502	0.0323887
230166	71.838	1.1488	0.0015		37.4809	11.511	0.0303644
230366	71.892	1.1497	0.0015		37.5091	11.52	0.0303644
230566	71.942	1.1507	0.0016		37.5352	11.5301	0.0323887
230768	72.002	1.1518	0.0015		37.5665	11.5411	0.0303644
230969	72.056	1.1527	0.0015		37.5947	11.5501	0.0303644
231170	72.11	1.1537	0.0015		37.6229	11.5601	0.0303644
231370	72.16	1.1548	0.0015		37.6489	11.5711	0.0303644
231570	72.22	1.1557	0.0015		37.6802	11.5802	0.0303644
231770	72.274	1.1568	0.0015		37.7084	11.5912	0.0303644
231971	72.33	1.1577	0.0015		37.7376	11.6002	0.0303644
232172	72.392	1.159	0.0015		37.77	11.6132	0.0303644
232372	72.46	1.16	0.0016		37.8055	11.6232	0.0323887
232572	72.518	1.1609	0.0015		37.8357	11.6323	0.0303644
232772	72.584	1.162	0.0015		37.8702	11.6433	0.0303644
232973	72.644	1.1629	0.0015		37.9015	11.6523	0.0303644
233173	72.7	1.164	0.0015		37.9307	11.6633	0.0303644
233374	72.754	1.165	0.0015		37.9589	11.6733	0.0303644
233574	72.806	1.166	0.0015		37.986	11.6834	0.0303644
233774	72.854	1.167	0.0016		38.011	11.6934	0.0323887
233976	72.906	1.168	0.0015		38.0382	11.7034	0.0303644
234177	72.956	1.1691	0.0015		38.0642	11.7144	0.0303644
234378	73.004	1.1701	0.0015		38.0893	11.7244	0.0303644
234578	73.056	1.1711	0.0016		38.1164	11.7345	0.0323887
234778	73.104	1.1721	0.0016		38.1415	11.7445	0.0323887
234978	73.152	1.1729	0.0015		38.1665	11.7525	0.0303644
235179	73.202	1.1738	0.0016		38.1926	11.7615	0.0323887
235380	73.258	1.1749	0.0015		38.2218	11.7725	0.0303644
235580	73.31	1.1758	0.0016		38.2489	11.7816	0.0323887
235780	73.356	1.177	0.0015		38.2729	11.7936	0.0303644
235980	73.406	1.178	0.0015		38.299	11.8036	0.0303644
236181	73.454	1.1788	0.0016		38.3241	11.8116	0.0323887
236381	73.5	1.1798	0.0015		38.3481	11.8216	0.0303644
236582	73.55	1.1808	0.0015		38.3742	11.8317	0.0303644
236782	73.6	1.1817	0.0015		38.4002	11.8407	0.0303644
236982	73.646	1.1829	0.0016		38.4242	11.8527	0.0323887
237184	73.696	1.1839	0.0015		38.4503	11.8627	0.0303644
237385	73.74	1.1847	0.0016		38.4733	11.8707	0.0323887
237586	73.79	1.1857	0.0015		38.4994	11.8808	0.0303644
237786	73.842	1.1866	0.0016		38.5265	11.8898	0.0323887
237986	73.9	1.1878	0.0015		38.5568	11.9018	0.0303644
238186	73.96	1.1888	0.0016		38.5881	11.9118	0.0323887
238387	74.018	1.1899	0.0015		38.6183	11.9228	0.0303644
238588	74.072	1.1908	0.0015		38.6465	11.9319	0.0303644
238788	74.124	1.192	0.0015		38.6736	11.9439	0.0303644
238988	74.172	1.1929	0.0015		38.6987	11.9529	0.0303644
239188	74.222	1.194	0.0016		38.7248	11.9639	0.0323887
239389	74.268	1.195	0.0016		38.7488	11.9739	0.0323887
239589	74.314	1.1959	0.0016		38.7728	11.983	0.0323887
239790	74.364	1.1969	0.0015		38.7989	11.993	0.0303644
239990	74.412	1.1978	0.0015		38.8239	12.002	0.0303644
240190	74.462	1.1988	0.0015		38.85	12.012	0.0303644
240392	74.51	1.1998	0.0015		38.875	12.022	0.0303644
240593	74.562	1.2008	0.0016		38.9022	12.0321	0.0323887
240794	74.612	1.2018	0.0015		38.9283	12.0421	0.0303644
240994	74.656	1.2028	0.0015		38.9512	12.0521	0.0303644
241194	74.71	1.2039	0.0015		38.9794	12.0631	0.0303644
241394	74.76	1.2049	0.0016		39.0055	12.0731	0.0323887
241595	74.804	1.2058	0.0015		39.0284	12.0822	0.0303644
241796	74.854	1.2068	0.0015		39.0545	12.0922	0.0303644
241996	74.902	1.2077	0.0014		39.0796	12.1012	0.0283401
242196	74.952	1.2088	0.0014		39.1056	12.1122	0.0283401
242396	75.002	1.2097	0.0014		39.1317	12.1212	0.0283401
242597	75.056	1.2108	0.0013		39.1599	12.1323	0.0263158
242797	75.104	1.2117	0.0014		39.1849	12.1413	0.0283401
242998	75.158	1.2127	0.0015		39.2131	12.1513	0.0303644
243198	75.208	1.2138	0.0015		39.2392	12.1623	0.0303644
243398	75.256	1.2148	0.0015		39.2643	12.1723	0.0303644
243600	75.306	1.2158	0.0015		39.2903	12.1824	0.0303644
243801	75.358	1.2167	0.0015		39.3175	12.1914	0.0303644
244002	75.41	1.2178	0.0016		39.3446	12.2024	0.0323887
244202	75.464	1.2189	0.0016		39.3728	12.2134	0.0323887
244402	75.522	1.2198	0.0015		39.403	12.2224	0.0303644
244602	75.574	1.221	0.0015		39.4302	12.2345	0.0303644
244803	75.628	1.2219	0.0015		39.4583	12.2435	0.0303644
245004	75.682	1.2228	0.0016		39.4865	12.2525	0.0323887
245204	75.74	1.2239	0.0015		39.5168	12.2635	0.0303644
245404	75.796	1.225	0.0015		39.546	12.2745	0.0303644
245604	75.848	1.2261	0.0016		39.5731	12.2856	0.0323887
245805	75.894	1.2271	0.0014		39.5971	12.2956	0.0283401
246005	75.936	1.228	0.0014		39.619	12.3046	0.0283401
246206	75.976	1.2291	0.0015		39.6399	12.3156	0.0303644
246406	76.012	1.23	0.0014		39.6587	12.3246	0.0283401
246606	76.05	1.231	0.0014		39.6785	12.3347	0.0283401
246808	76.09	1.232	0.0013		39.6994	12.3447	0.0263158
247009	76.144	1.2329	0.0013		39.7276	12.3537	0.0263158
247210	76.194	1.2338	0.0013		39.7536	12.3627	0.0263158
247410	76.246	1.2349	0.0015		39.7808	12.3737	0.0303644
247610	76.298	1.2359	0.0014		39.8079	12.3838	0.0283401
247810	76.346	1.2369	0.0015		39.833	12.3938	0.0303644
248011	76.394	1.2379	0.0015		39.858	12.4038	0.0303644
248212	76.438	1.2389	0.0016		39.881	12.4138	0.0323887
248412	76.486	1.2398	0.0016		39.906	12.4228	0.0323887
248612	76.526	1.2409	0.0015		39.9269	12.4339	0.0303644
248812	76.566	1.2419	0.0015		39.9477	12.4439	0.0303644
249013	76.608	1.2429	0.0016		39.9696	12.4539	0.0323887
249213	76.656	1.244	0.0016		39.9947	12.4649	0.0323887
249414	76.7	1.2449	0.0015		40.0177	12.4739	0.0303644
249614	76.744	1.2458	0.0015		40.0406	12.483	0.0303644
249814	76.788	1.2468	0.0016		40.0636	12.493	0.0323887
250015	76.836	1.2478	0.0013		40.0886	12.503	0.0263158
250215	76.876	1.2488	0.0015		40.1095	12.513	0.0303644
250416	76.918	1.2498	0.0015		40.1314	12.523	0.0303644
250616	76.96	1.2509	0.0013		40.1533	12.5341	0.0263158
250816	77.002	1.2519	0.0014		40.1752	12.5441	0.0283401
251018	77.046	1.2528	0.0013		40.1982	12.5531	0.0263158
251219	77.094	1.2539	0.0015		40.2232	12.5641	0.0303644
251420	77.138	1.2549	0.0014		40.2462	12.5741	0.0283401
251620	77.186	1.2558	0.0012		40.2712	12.5832	0.0242915
251820	77.228	1.2569	0.0015		40.2931	12.5942	0.0303644
252020	77.27	1.2579	0.0015		40.315	12.6042	0.0303644
252221	77.316	1.2589	0.0013		40.339	12.6142	0.0263158
252422	77.364	1.2597	0.0012		40.3641	12.6222	0.0242915
252622	77.418	1.2609	0.0012		40.3923	12.6343	0.0242915
252822	77.466	1.262	0.0012		40.4173	12.6453	0.0242915
253022	77.512	1.2629	0.0015		40.4413	12.6543	0.0303644
253223	77.562	1.2638	0.0012		40.4674	12.6633	0.0242915
253423	77.606	1.2648	0.0015		40.4903	12.6733	0.0303644
253624	77.652	1.2658	0.0016		40.5143	12.6834	0.0323887
253824	77.698	1.267	0.0015		40.5383	12.6954	0.0303644
254024	77.744	1.268	0.0015		40.5623	12.7054	0.0303644
254226	77.794	1.2691	0.0016		40.5884	12.7164	0.0323887
254427	77.836	1.2699	0.0016		40.6103	12.7244	0.0323887
254628	77.882	1.271	0.0016		40.6343	12.7355	0.0323887
254828	77.924	1.272	0.0016		40.6563	12.7455	0.0323887
255028	77.986	1.273	0.0016		40.6886	12.7555	0.0323887
255228	78.036	1.274	0.0015		40.7147	12.7655	0.0303644
255429	78.09	1.2752	0.0015		40.7429	12.7776	0.0303644
255630	78.132	1.276	0.0014		40.7648	12.7856	0.0283401
255830	78.174	1.2771	0.0015		40.7867	12.7966	0.0303644
256030	78.218	1.2781	0.0015		40.8097	12.8066	0.0303644
256230	78.258	1.2791	0.0015		40.8305	12.8166	0.0303644
256431	78.302	1.2801	0.0013		40.8535	12.8267	0.0263158
256631	78.346	1.2812	0.0016		40.8764	12.8377	0.0323887
256832	78.386	1.2822	0.0014		40.8973	12.8477	0.0283401
257032	78.424	1.2832	0.0015		40.9171	12.8577	0.0303644
257232	78.468	1.2841	0.0012		40.9401	12.8667	0.0242915
257434	78.508	1.285	0.0015		40.961	12.8758	0.0303644
257635	78.554	1.2862	0.0015		40.985	12.8878	0.0303644
257836	78.596	1.287	0.0015		41.0069	12.8958	0.0303644
258036	78.64	1.288	0.0014		41.0298	12.9058	0.0283401
258236	78.686	1.2892	0.0015		41.0538	12.9178	0.0303644
258436	78.726	1.2902	0.0014		41.0747	12.9279	0.0283401
258637	78.768	1.2911	0.0014		41.0966	12.9369	0.0283401
258838	78.814	1.292	0.0015		41.1206	12.9459	0.0303644
259038	78.856	1.293	0.0015		41.1425	12.9559	0.0303644
259238	78.9	1.2941	0.0015		41.1655	12.9669	0.0303644
259438	78.936	1.295	0.0015		41.1843	12.976	0.0303644
259639	78.978	1.2961	0.0013		41.2062	12.987	0.0263158
259839	79.018	1.297	0.0014		41.227	12.996	0.0283401
260040	79.06	1.298	0.0014		41.249	13.006	0.0283401
260240	79.1	1.299	0.0015		41.2698	13.016	0.0303644
260440	79.14	1.3	0.0014		41.2907	13.0261	0.0283401
260642	79.178	1.301	0.0015		41.3105	13.0361	0.0303644
260843	79.222	1.3019	0.0015		41.3335	13.0451	0.0303644
261044	79.276	1.3031	0.0014		41.3617	13.0571	0.0283401
261244	79.322	1.3042	0.0014		41.3857	13.0681	0.0283401
261444	79.37	1.3052	0.0015		41.4107	13.0782	0.0303644
261644	79.416	1.3062	0.0016		41.4347	13.0882	0.0323887
261845	79.46	1.3071	0.0016		41.4577	13.0972	0.0323887
262046	79.506	1.3082	0.0015		41.4817	13.1082	0.0303644
262246	79.548	1.3093	0.0015		41.5036	13.1192	0.0303644
262446	79.586	1.3104	0.0015		41.5234	13.1303	0.0303644
262646	79.622	1.3113	0.0015		41.5422	13.1393	0.0303644
262847	79.644	1.3125	0.0015		41.5537	13.1513	0.0303644
263047	79.672	1.3134	0.0015		41.5683	13.1603	0.0303644
263248	79.698	1.3144	0.0016		41.5818	13.1703	0.0323887
263448	79.726	1.3154	0.0016		41.5964	13.1804	0.0323887
263648	79.752	1.3164	0.0015		41.61	13.1904	0.0303644
263850	79.764	1.3176	0.0015		41.6163	13.2024	0.0303644
264051	79.744	1.319	0.0015		41.6058	13.2164	0.0303644
264252	79.726	1.3195	0.0015		41.5964	13.2214	0.0303644
264452	79.718	1.3205	0.0016		41.5923	13.2315	0.0323887
264652	79.726	1.3212	0.0016		41.5964	13.2385	0.0323887
264852	79.742	1.3221	0.0016		41.6048	13.2475	0.0323887
265053	79.768	1.323	0.0015		41.6184	13.2565	0.0303644
265254	79.796	1.3239	0.0015		41.633	13.2655	0.0303644
265454	79.838	1.3249	0.0015		41.6549	13.2756	0.0303644
265654	79.874	1.3259	0.0015		41.6737	13.2856	0.0303644
265854	79.922	1.3269	0.0016		41.6987	13.2956	0.0323887
266055	79.968	1.328	0.0015		41.7227	13.3066	0.0303644
266255	80.01	1.3289	0.0015		41.7446	13.3156	0.0303644
266456	80.058	1.3299	0.0015		41.7697	13.3257	0.0303644
266656	80.1	1.3309	0.0015		41.7916	13.3357	0.0303644
266856	80.15	1.332	0.0015		41.8177	13.3467	0.0303644
267058	80.188	1.333	0.0015		41.8375	13.3567	0.0303644
267259	80.228	1.3339	0.0015		41.8584	13.3657	0.0303644
267460	80.262	1.3349	0.0015		41.8761	13.3758	0.0303644
267660	80.3	1.3359	0.0016		41.8959	13.3858	0.0323887
267860	80.338	1.3368	0.0015		41.9157	13.3948	0.0303644
268060	80.378	1.3379	0.0015		41.9366	13.4058	0.0303644
268261	80.418	1.339	0.0015		41.9575	13.4168	0.0303644
268462	80.46	1.34	0.0015		41.9794	13.4269	0.0303644
268662	80.5	1.3408	0.0015		42.0003	13.4349	0.0303644
268862	80.536	1.3418	0.0015		42.0191	13.4449	0.0303644
269062	80.576	1.3429	0.0015		42.0399	13.4559	0.0303644
269263	80.612	1.3438	0.0015		42.0587	13.4649	0.0303644
269463	80.656	1.3448	0.0016		42.0817	13.4749	0.0323887
269664	80.692	1.3459	0.0016		42.1004	13.486	0.0323887
269864	80.72	1.347	0.0015		42.1151	13.497	0.0303644
270064	80.756	1.3481	0.0015		42.1338	13.508	0.0303644
270265	80.774	1.3493	0.0014		42.1432	13.52	0.0283401
270465	80.796	1.3501	0.0014		42.1547	13.5281	0.0283401
270666	80.824	1.3512	0.0015		42.1693	13.5391	0.0303644
270866	80.85	1.3521	0.0015		42.1829	13.5481	0.0303644
271066	80.872	1.3532	0.0015		42.1944	13.5591	0.0303644
271268	80.9	1.3542	0.0015		42.209	13.5691	0.0303644
271469	80.924	1.3551	0.0012		42.2215	13.5782	0.0242915
271670	80.946	1.356	0.0014		42.233	13.5872	0.0283401
271870	80.962	1.3572	0.0015		42.2413	13.5992	0.0303644
272070	80.986	1.3581	0.0015		42.2538	13.6082	0.0303644
272270	81.012	1.3591	0.0016		42.2674	13.6182	0.0323887
272471	81.04	1.3601	0.0015		42.282	13.6283	0.0303644
272672	81.068	1.361	0.0015		42.2966	13.6373	0.0303644
272872	81.102	1.362	0.0014		42.3144	13.6473	0.0283401
273072	81.13	1.3631	0.0014		42.329	13.6583	0.0283401
273272	81.166	1.3639	0.0015		42.3478	13.6663	0.0303644
273473	81.2	1.3649	0.0015		42.3655	13.6764	0.0303644
273673	81.24	1.366	0.0016		42.3864	13.6874	0.0323887
273874	81.274	1.3668	0.0016		42.4041	13.6954	0.0323887
274074	81.312	1.3679	0.0015		42.4239	13.7064	0.0303644
274274	81.352	1.369	0.0015		42.4448	13.7174	0.0303644
274476	81.392	1.3701	0.0016		42.4657	13.7285	0.0323887
274677	81.424	1.3711	0.0016		42.4824	13.7385	0.0323887
274878	81.45	1.372	0.0015		42.4959	13.7475	0.0303644
275078	81.438	1.3732	0.0014		42.4897	13.7595	0.0283401
275278	81.43	1.3741	0.0015		42.4855	13.7685	0.0303644
275478	81.424	1.3754	0.0014		42.4824	13.7816	0.0283401
275679	81.412	1.3764	0.0015		42.4761	13.7916	0.0303644
275880	81.394	1.3774	0.0014		42.4667	13.8016	0.0283401
276080	81.354	1.3784	0.0013		42.4458	13.8116	0.0263158
276280	81.322	1.3794	0.0015		42.4291	13.8216	0.0303644
276480	81.304	1.3805	0.0014		42.4198	13.8327	0.0283401
276681	81.294	1.3815	0.0015		42.4145	13.8427	0.0303644
276881	81.29	1.3825	0.0012		42.4124	13.8527	0.0242915
277082	81.292	1.3833	0.0016		42.4135	13.8607	0.0323887
277282	81.308	1.3845	0.0015		42.4218	13.8727	0.0303644
277482	81.318	1.3853	0.0015		42.4271	13.8808	0.0303644
277684	81.336	1.3862	0.0015		42.4364	13.8898	0.0303644
277885	81.354	1.3872	0.0015		42.4458	13.8998	0.0303644
278086	81.376	1.3883	0.0015		42.4573	13.9108	0.0303644
278286	81.398	1.3892	0.0015		42.4688	13.9198	0.0303644
278486	81.424	1.3901	0.0015		42.4824	13.9289	0.0303644
278686	81.448	1.3911	0.0015		42.4949	13.9389	0.0303644
278808	80.212	1.3934	0.0015		41.85	13.9619	0.0303644
278812	78.988	1.3947	0.0015		41.2114	13.9749	0.0303644
278814	77.65	1.396	0.0016		40.5133	13.988	0.0323887
278816	76.036	1.3982	0.0017		39.6712	14.01	0.034413
278818	74.844	1.4016	0.0021		39.0493	14.0441	0.0425101
278822	72.152	1.4016	0.0021		37.6448	14.0441	0.0425101
278824	57.87	1.4016	0.0021		30.1932	14.0441	0.0425101
278826	24.564	1.4016	0.0021		12.8161	14.0441	0.0425101
278828	0.63	1.4016	0.0021		0.328698	14.0441	0.0425101
278830	0	1.9175	0.0507		0	19.2134	1.02632

## Sheet: C-4
Time: 09:44:18,06/22/2019
diameter: 49.3	mm	height: 100.1	mm
Vertical 100kN force sensor (vertical force of test piece)
Control mode: displacement	Waveform: ramp
mm/s	End point: 1.3314	mm
time (ms)	vertical force (KN)	vertical deformation (mm)	transverse deformation (mm)		stress	axial strain	transverse strain
0	0	0	0		0	0	0
200	0.018	0.0002	0.0002		0.0094295	0.001998	0.0040568
400	0.068	0.0015	-0.0008		0.0356226	0.014985	-0.0162272
600	0.09	0.0036	-0.0023		0.0471475	0.035964	-0.0466531
800	0.094	0.004	-0.0029		0.049243	0.03996	-0.0588235
1000	0.1	0.0046	-0.0033		0.0523861	0.045954	-0.0669371
1200	0.11	0.0056	-0.003		0.0576247	0.0559441	-0.0608519
1400	0.122	0.0068	-0.0032		0.0639111	0.0679321	-0.0649087
1600	0.134	0.0083	-0.0033		0.0701974	0.0829171	-0.0669371
1800	0.14	0.0096	-0.0034		0.0733406	0.0959041	-0.0689655
2000	0.138	0.0102	-0.0035		0.0722929	0.101898	-0.0709939
2200	0.144	0.0107	-0.0035		0.075436	0.106893	-0.0709939
2400	0.154	0.0113	-0.0033		0.0806746	0.112887	-0.0669371
2600	0.168	0.0123	-0.0028		0.0880087	0.122877	-0.0567951
2800	0.178	0.0136	-0.0033		0.0932473	0.135864	-0.0669371
3000	0.188	0.0152	-0.0036		0.0984859	0.151848	-0.0730223
3200	0.19	0.0165	-0.0037		0.0995336	0.164835	-0.0750507
3400	0.19	0.017	-0.0038		0.0995336	0.16983	-0.0770791
3600	0.194	0.0174	-0.0039		0.101629	0.173826	-0.0791075
3800	0.21	0.0181	-0.0037		0.110011	0.180819	-0.0750507
4000	0.224	0.0192	-0.0038		0.117345	0.191808	-0.0770791
4200	0.236	0.0212	-0.0041		0.123631	0.211788	-0.0831643
4400	0.222	0.0224	-0.0042		0.116297	0.223776	-0.0851927
4600	0.208	0.0226	-0.0044		0.108963	0.225774	-0.0892495
4800	0.232	0.0233	-0.0044		0.121536	0.232767	-0.0892495
5000	0.252	0.0246	-0.0042		0.132013	0.245754	-0.0851927
5200	0.262	0.0259	-0.0043		0.137252	0.258741	-0.0872211
5400	0.272	0.0272	-0.0045		0.14249	0.271728	-0.0912779
5600	0.276	0.0284	-0.0046		0.144586	0.283716	-0.0933063
5800	0.276	0.0294	-0.0048		0.144586	0.293706	-0.0973631
6000	0.27	0.0301	-0.005		0.141443	0.300699	-0.10142
6200	0.272	0.0309	-0.0051		0.14249	0.308691	-0.103448
6400	0.274	0.0314	-0.0052		0.143538	0.313686	-0.105477
6600	0.282	0.0322	-0.0052		0.147729	0.321678	-0.105477
6800	0.294	0.0332	-0.0054		0.154015	0.331668	-0.109533
7000	0.302	0.0343	-0.0055		0.158206	0.342657	-0.111562
7200	0.31	0.0354	-0.0057		0.162397	0.353646	-0.115619
7400	0.316	0.0367	-0.006		0.16554	0.366633	-0.121704
7600	0.326	0.0379	-0.0061		0.170779	0.378621	-0.123732
7800	0.332	0.0392	-0.0062		0.173922	0.391608	-0.125761
8000	0.338	0.0403	-0.0062		0.177065	0.402597	-0.125761
8200	0.344	0.0414	-0.0064		0.180208	0.413586	-0.129817
8400	0.336	0.0423	-0.0067		0.176017	0.422577	-0.135903
8600	0.336	0.0428	-0.0068		0.176017	0.427572	-0.137931
8800	0.334	0.0435	-0.007		0.17497	0.434565	-0.141988
9000	0.344	0.0441	-0.007		0.180208	0.440559	-0.141988
9200	0.356	0.0451	-0.0069		0.186495	0.450549	-0.139959
9400	0.368	0.0463	-0.0069		0.192781	0.462537	-0.139959
9600	0.376	0.0474	-0.007		0.196972	0.473526	-0.141988
9800	0.384	0.0487	-0.0057		0.201163	0.486513	-0.115619
10000	0.394	0.0499	-0.0058		0.206401	0.498501	-0.117647
10200	0.4	0.0512	-0.0059		0.209545	0.511489	-0.119675
10400	0.404	0.0523	-0.006		0.21164	0.522478	-0.121704
10600	0.41	0.0532	-0.0061		0.214783	0.531469	-0.123732
10800	0.412	0.0541	-0.0061		0.215831	0.54046	-0.123732
11000	0.41	0.0551	-0.0059		0.214783	0.55045	-0.119675
11200	0.41	0.056	-0.0061		0.214783	0.559441	-0.123732
11400	0.412	0.0568	-0.0061		0.215831	0.567433	-0.123732
11600	0.42	0.0577	-0.0061		0.220022	0.576424	-0.123732
11800	0.422	0.0586	-0.0061		0.221069	0.585415	-0.123732
12000	0.424	0.0595	-0.0056		0.222117	0.594406	-0.11359
12200	0.428	0.0605	-0.0057		0.224213	0.604396	-0.115619
12400	0.434	0.0613	-0.0056		0.227356	0.612388	-0.11359
12600	0.438	0.0623	-0.0057		0.229451	0.622378	-0.115619
12800	0.442	0.0631	-0.0058		0.231547	0.63037	-0.117647
13000	0.446	0.0642	-0.0059		0.233642	0.641359	-0.119675
13200	0.454	0.0651	-0.0057		0.237833	0.65035	-0.115619
13400	0.46	0.066	-0.0057		0.240976	0.659341	-0.115619
13600	0.466	0.0671	-0.0057		0.244119	0.67033	-0.115619
13800	0.468	0.0681	-0.0056		0.245167	0.68032	-0.11359
14000	0.478	0.0691	-0.0056		0.250406	0.69031	-0.11359
14200	0.482	0.07	-0.0055		0.252501	0.699301	-0.111562
14400	0.49	0.0711	-0.0054		0.256692	0.71029	-0.109533
14600	0.496	0.072	-0.0054		0.259835	0.719281	-0.109533
14800	0.502	0.0733	-0.0053		0.262978	0.732268	-0.107505
15000	0.51	0.0743	-0.0051		0.267169	0.742258	-0.103448
15200	0.52	0.0754	-0.0052		0.272408	0.753247	-0.105477
15400	0.524	0.0765	-0.0053		0.274503	0.764236	-0.107505
15600	0.532	0.0775	-0.0052		0.278694	0.774226	-0.105477
15800	0.536	0.0785	-0.0053		0.28079	0.784216	-0.107505
16000	0.542	0.0796	-0.0052		0.283933	0.795205	-0.105477
16200	0.548	0.0806	-0.0053		0.287076	0.805195	-0.107505
16400	0.552	0.0816	-0.0054		0.289171	0.815185	-0.109533
16600	0.56	0.0826	-0.0055		0.293362	0.825175	-0.111562
16800	0.564	0.0837	-0.0056		0.295458	0.836164	-0.11359
17000	0.57	0.0846	-0.0056		0.298601	0.845155	-0.11359
17200	0.576	0.0855	-0.0056		0.301744	0.854146	-0.11359
17400	0.582	0.0864	-0.0056		0.304887	0.863137	-0.11359
17600	0.586	0.0872	-0.0056		0.306983	0.871129	-0.11359
17800	0.59	0.0883	-0.0055		0.309078	0.882118	-0.111562
18000	0.594	0.0892	-0.0055		0.311174	0.891109	-0.111562
18200	0.6	0.09	-0.0048		0.314317	0.899101	-0.0973631
18400	0.604	0.091	-0.0049		0.316412	0.909091	-0.0993915
18600	0.61	0.0919	-0.0048		0.319555	0.918082	-0.0973631
18800	0.616	0.0928	-0.0046		0.322699	0.927073	-0.0933063
19000	0.62	0.0938	-0.0046		0.324794	0.937063	-0.0933063
19200	0.632	0.0949	-0.0046		0.33108	0.948052	-0.0933063
19400	0.644	0.096	-0.0046		0.337367	0.959041	-0.0933063
19600	0.652	0.0976	-0.0046		0.341558	0.975025	-0.0933063
19800	0.664	0.0988	-0.0048		0.347844	0.987013	-0.0973631
20000	0.674	0.1002	-0.0048		0.353082	1.001	-0.0973631
20200	0.676	0.1013	-0.0047		0.35413	1.01199	-0.0953347
20400	0.68	0.1023	-0.0049		0.356226	1.02198	-0.0993915
20600	0.686	0.103	-0.0041		0.359369	1.02897	-0.0831643
20800	0.688	0.1039	-0.0032		0.360417	1.03796	-0.0649087
21000	0.696	0.1045	-0.0046		0.364607	1.04396	-0.0933063
21200	0.708	0.1054	-0.0047		0.370894	1.05295	-0.0953347
21400	0.714	0.1061	-0.0047		0.374037	1.05994	-0.0953347
21600	0.726	0.107	-0.0042		0.380323	1.06893	-0.0851927
21800	0.738	0.108	-0.0046		0.38661	1.07892	-0.0933063
22000	0.75	0.109	-0.0047		0.392896	1.08891	-0.0953347
22200	0.76	0.1104	-0.0043		0.398135	1.1029	-0.0872211
22400	0.772	0.1116	-0.0023		0.404421	1.11489	-0.0466531
22600	0.784	0.1128	-0.0032		0.410707	1.12687	-0.0649087
22800	0.792	0.1139	-0.0014		0.414898	1.13786	-0.0283976
23000	0.804	0.1148	-0.0033		0.421184	1.14685	-0.0669371
23200	0.812	0.1157	-0.0033		0.425375	1.15584	-0.0669371
23400	0.822	0.1167	-0.0026		0.430614	1.16583	-0.0527383
23600	0.834	0.1177	-0.0032		0.4369	1.17582	-0.0649087
23800	0.846	0.1186	-0.0033		0.443187	1.18482	-0.0669371
24000	0.858	0.1194	-0.0033		0.449473	1.19281	-0.0669371
24200	0.87	0.1201	-0.0032		0.455759	1.1998	-0.0649087
24400	0.884	0.1211	-0.0033		0.463093	1.20979	-0.0669371
24600	0.898	0.1221	-0.003		0.470427	1.21978	-0.0608519
24800	0.908	0.123	-0.0036		0.475666	1.22877	-0.0730223
25000	0.926	0.124	-0.003		0.485096	1.23876	-0.0608519
25200	0.942	0.1251	-0.0032		0.493477	1.24975	-0.0649087
25400	0.956	0.1261	-0.0037		0.500811	1.25974	-0.0750507
25600	0.974	0.1274	-0.0034		0.510241	1.27273	-0.0689655
25800	0.99	0.1285	-0.0037		0.518623	1.28372	-0.0750507
26000	1.01	0.1297	-0.0039		0.5291	1.2957	-0.0791075
26200	1.03	0.1309	-0.0039		0.539577	1.30769	-0.0791075
26400	1.048	0.1323	-0.0037		0.549007	1.32168	-0.0750507
26600	1.066	0.1333	-0.0038		0.558436	1.33167	-0.0770791
26800	1.076	0.1342	-0.0036		0.563675	1.34066	-0.0730223
27000	1.086	0.1352	-0.0039		0.568913	1.35065	-0.0791075
27200	1.102	0.136	-0.0037		0.577295	1.35864	-0.0750507
27400	1.118	0.1369	-0.0042		0.585677	1.36763	-0.0851927
27600	1.134	0.1377	-0.004		0.594059	1.37562	-0.0811359
27800	1.148	0.1388	-0.0039		0.601393	1.38661	-0.0791075
28000	1.166	0.1398	-0.0037		0.610822	1.3966	-0.0750507
28200	1.182	0.1408	-0.0038		0.619204	1.40659	-0.0770791
28400	1.202	0.1418	-0.004		0.629681	1.41658	-0.0811359
28600	1.218	0.1429	-0.0039		0.638063	1.42757	-0.0791075
28800	1.236	0.1438	-0.004		0.647493	1.43656	-0.0811359
29000	1.254	0.1447	-0.004		0.656922	1.44555	-0.0811359
29200	1.272	0.1457	-0.004		0.666352	1.45554	-0.0811359
29400	1.29	0.1468	-0.0039		0.675781	1.46653	-0.0791075
29600	1.308	0.1479	-0.004		0.685211	1.47752	-0.0811359
29800	1.326	0.1489	-0.004		0.69464	1.48751	-0.0811359
30000	1.344	0.15	-0.004		0.70407	1.4985	-0.0811359
30200	1.362	0.1511	-0.004		0.713499	1.50949	-0.0811359
30400	1.384	0.152	-0.004		0.725024	1.51848	-0.0811359
30600	1.4	0.1531	-0.0041		0.733406	1.52947	-0.0831643
30800	1.418	0.1542	-0.0041		0.742835	1.54046	-0.0831643
31000	1.436	0.1552	-0.0041		0.752265	1.55045	-0.0831643
31200	1.454	0.1562	-0.0041		0.761694	1.56044	-0.0831643
31400	1.474	0.1572	-0.0035		0.772171	1.57043	-0.0709939
31600	1.49	0.1582	-0.0021		0.780553	1.58042	-0.0425963
31800	1.508	0.1592	-0.0022		0.789983	1.59041	-0.0446247
32000	1.522	0.1602	-0.0022		0.797317	1.6004	-0.0446247
32200	1.542	0.1611	-0.0021		0.807794	1.60939	-0.0425963
32400	1.56	0.1621	-0.0022		0.817224	1.61938	-0.0446247
32600	1.574	0.1631	-0.0023		0.824558	1.62937	-0.0466531
32800	1.592	0.1641	-0.0023		0.833987	1.63936	-0.0466531
33000	1.61	0.1651	-0.0022		0.843417	1.64935	-0.0446247
33200	1.628	0.1662	-0.0024		0.852846	1.66034	-0.0486815
33400	1.646	0.167	-0.0024		0.862276	1.66833	-0.0486815
33600	1.664	0.168	-0.0024		0.871705	1.67832	-0.0486815
33800	1.682	0.1691	-0.0024		0.881135	1.68931	-0.0486815
34000	1.7	0.17	-0.0025		0.890564	1.6983	-0.0507099
34200	1.72	0.171	-0.0025		0.901041	1.70829	-0.0507099
34400	1.734	0.172	-0.0025		0.908375	1.71828	-0.0507099
34600	1.752	0.1728	-0.0025		0.917805	1.72627	-0.0507099
34800	1.768	0.1737	-0.0026		0.926187	1.73526	-0.0527383
35000	1.788	0.1748	-0.0026		0.936664	1.74625	-0.0527383
35200	1.802	0.1757	-0.0027		0.943998	1.75524	-0.0547667
35400	1.822	0.1767	-0.0026		0.954475	1.76523	-0.0527383
35600	1.84	0.1778	-0.0026		0.963905	1.77622	-0.0527383
35800	1.858	0.1788	-0.0026		0.973334	1.78621	-0.0527383
36000	1.874	0.1798	-0.0026		0.981716	1.7962	-0.0527383
36200	1.894	0.1808	-0.0026		0.992193	1.80619	-0.0527383
36400	1.912	0.1819	-0.0026		1.00162	1.81718	-0.0527383
36600	1.93	0.1828	-0.0026		1.01105	1.82617	-0.0527383
36800	1.948	0.1838	-0.0026		1.02048	1.83616	-0.0527383
37000	1.968	0.1847	-0.0027		1.03096	1.84515	-0.0547667
37200	1.984	0.1859	-0.0026		1.03934	1.85714	-0.0527383
37400	2.004	0.1869	-0.0027		1.04982	1.86713	-0.0547667
37600	2.022	0.1879	-0.0025		1.05925	1.87712	-0.0507099
37800	2.04	0.1889	-0.0026		1.06868	1.88711	-0.0527383
38000	2.06	0.1898	-0.0025		1.07915	1.8961	-0.0507099
38200	2.076	0.1907	-0.0023		1.08754	1.90509	-0.0466531
38400	2.094	0.1916	-0.0023		1.09697	1.91409	-0.0466531
38600	2.114	0.1925	-0.0024		1.10744	1.92308	-0.0486815
38800	2.134	0.1934	-0.0022		1.11792	1.93207	-0.0446247
39000	2.156	0.1943	-0.0022		1.12944	1.94106	-0.0446247
39200	2.178	0.1955	-0.0024		1.14097	1.95305	-0.0486815
39400	2.204	0.1965	-0.0023		1.15459	1.96304	-0.0466531
39600	2.224	0.1976	-0.0024		1.16507	1.97403	-0.0486815
39800	2.244	0.1985	-0.0024		1.17554	1.98302	-0.0486815
40000	2.268	0.1996	-0.0025		1.18812	1.99401	-0.0507099
40200	2.29	0.2007	-0.0025		1.19964	2.005	-0.0507099
40400	2.314	0.2019	-0.0025		1.21221	2.01698	-0.0507099
40600	2.334	0.2028	-0.0025		1.22269	2.02597	-0.0507099
40800	2.354	0.2038	-0.0025		1.23317	2.03596	-0.0507099
41000	2.372	0.2048	-0.0025		1.2426	2.04595	-0.0507099
41200	2.394	0.2057	-0.0027		1.25412	2.05495	-0.0547667
41400	2.414	0.2068	-0.0027		1.2646	2.06593	-0.0547667
41600	2.438	0.2079	-0.0026		1.27717	2.07692	-0.0527383
41800	2.458	0.2088	-0.0027		1.28765	2.08591	-0.0547667
42000	2.476	0.2098	-0.0026		1.29708	2.0959	-0.0527383
42200	2.5	0.2108	-0.0026		1.30965	2.10589	-0.0527383
42400	2.52	0.2117	-0.0026		1.32013	2.11489	-0.0527383
42600	2.54	0.2128	-0.0026		1.33061	2.12587	-0.0527383
42800	2.566	0.2138	-0.0026		1.34423	2.13586	-0.0527383
43000	2.586	0.2147	-0.0026		1.35471	2.14486	-0.0527383
43200	2.608	0.2157	-0.0016		1.36623	2.15485	-0.0324544
43400	2.634	0.2167	-0.0012		1.37985	2.16484	-0.0243408
43600	2.65	0.2177	-0.0013		1.38823	2.17483	-0.0263692
43800	2.678	0.2187	-0.0013		1.4029	2.18482	-0.0263692
44000	2.702	0.2197	-0.0013		1.41547	2.19481	-0.0263692
44200	2.728	0.2207	-0.0014		1.42909	2.2048	-0.0283976
44400	2.746	0.2217	-0.0014		1.43852	2.21479	-0.0283976
44600	2.77	0.2227	-0.0014		1.4511	2.22478	-0.0283976
44800	2.794	0.2236	-0.0014		1.46367	2.23377	-0.0283976
45000	2.816	0.2246	-0.0013		1.47519	2.24376	-0.0263692
45200	2.838	0.2258	-0.0014		1.48672	2.25574	-0.0283976
45400	2.862	0.2267	-0.0014		1.49929	2.26474	-0.0283976
45600	2.886	0.2277	-0.0015		1.51186	2.27473	-0.030426
45800	2.912	0.2287	-0.0015		1.52548	2.28472	-0.030426
46000	2.93	0.2297	-0.0011		1.53491	2.29471	-0.0223124
46200	2.956	0.2307	-0.0012		1.54853	2.3047	-0.0243408
46400	2.98	0.2317	-0.0012		1.56111	2.31469	-0.0243408
46600	3.004	0.2327	-0.0012		1.57368	2.32468	-0.0243408
46800	3.032	0.2337	-0.0012		1.58835	2.33467	-0.0243408
47000	3.056	0.2346	-0.001		1.60092	2.34366	-0.020284
47200	3.078	0.2357	-0.001		1.61244	2.35465	-0.020284
47400	3.1	0.2367	-0.001		1.62397	2.36464	-0.020284
47600	3.126	0.2375	-0.001		1.63759	2.37263	-0.020284
47800	3.15	0.2387	-0.0008		1.65016	2.38462	-0.0162272
48000	3.174	0.2395	-0.0008		1.66274	2.39261	-0.0162272
48200	3.2	0.2406	-0.0008		1.67636	2.4036	-0.0162272
48400	3.226	0.2416	-0.0006		1.68998	2.41359	-0.0121704
48600	3.252	0.2426	-0.0004		1.7036	2.42358	-0.00811359
48800	3.276	0.2436	-0.0005		1.71617	2.43357	-0.010142
49000	3.298	0.2445	-0.0003		1.72769	2.44256	-0.00608519
49200	3.324	0.2455	-0.0004		1.74131	2.45255	-0.00811359
49400	3.35	0.2467	-0.0002		1.75494	2.46454	-0.0040568
49600	3.378	0.2476	-0.0002		1.7696	2.47353	-0.0040568
49800	3.402	0.2487	0		1.78218	2.48452	0
50000	3.428	0.2496	0		1.7958	2.49351	0
50200	3.452	0.2505	0		1.80837	2.5025	0
50400	3.476	0.2516	0		1.82094	2.51349	0
50600	3.504	0.2525	0.0001		1.83561	2.52248	0.0020284
50800	3.53	0.2536	0.0002		1.84923	2.53347	0.0040568
51000	3.556	0.2546	0.0002		1.86285	2.54346	0.0040568
51200	3.584	0.2556	0.0002		1.87752	2.55345	0.0040568
51400	3.61	0.2566	0.0002		1.89114	2.56344	0.0040568
51600	3.636	0.2575	0.0002		1.90476	2.57243	0.0040568
51800	3.662	0.2585	0.0002		1.91838	2.58242	0.0040568
52000	3.692	0.2596	0.0002		1.9341	2.59341	0.0040568
52200	3.72	0.2606	0.0003		1.94876	2.6034	0.00608519
52400	3.742	0.2616	0.0004		1.96029	2.61339	0.00811359
52600	3.77	0.2625	0.0003		1.97496	2.62238	0.00608519
52800	3.796	0.2634	0.0003		1.98858	2.63137	0.00608519
53000	3.824	0.2644	0.0005		2.00325	2.64136	0.010142
53200	3.852	0.2654	0.0004		2.01791	2.65135	0.00811359
53400	3.878	0.2665	0.0003		2.03153	2.66234	0.00608519
53600	3.908	0.2674	0.0003		2.04725	2.67133	0.00608519
53800	3.932	0.2685	0.0003		2.05982	2.68232	0.00608519
54000	3.96	0.2695	0.0003		2.07449	2.69231	0.00608519
54200	3.986	0.2705	0.0001		2.08811	2.7023	0.0020284
54400	4.014	0.2715	0.0001		2.10278	2.71229	0.0020284
54600	4.044	0.2725	-0.0001		2.11849	2.72228	-0.0020284
54800	4.072	0.2735	-0.0001		2.13316	2.73227	-0.0020284
55000	4.096	0.2745	-0.0001		2.14574	2.74226	-0.0020284
55200	4.124	0.2756	-0.0003		2.1604	2.75325	-0.00608519
55400	4.154	0.2765	-0.0004		2.17612	2.76224	-0.00811359
55600	4.178	0.2776	-0.0006		2.18869	2.77323	-0.0121704
55800	4.208	0.2785	-0.0008		2.20441	2.78222	-0.0162272
56000	4.236	0.2796	-0.0009		2.21908	2.79321	-0.0182556
56200	4.262	0.2805	-0.0011		2.2327	2.8022	-0.0223124
56400	4.29	0.2815	-0.0013		2.24736	2.81219	-0.0263692
56600	4.318	0.2825	-0.0015		2.26203	2.82218	-0.030426
56800	4.346	0.2835	-0.0016		2.2767	2.83217	-0.0324544
57000	4.372	0.2845	-0.0019		2.29032	2.84216	-0.0385396
57200	4.4	0.2853	-0.002		2.30499	2.85015	-0.040568
57400	4.428	0.2864	-0.002		2.31966	2.86114	-0.040568
57600	4.46	0.2875	-0.0023		2.33642	2.87213	-0.0466531
57800	4.496	0.2888	-0.0026		2.35528	2.88511	-0.0527383
58000	4.526	0.2898	-0.0026		2.371	2.8951	-0.0527383
58200	4.55	0.2912	-0.003		2.38357	2.90909	-0.0608519
58400	4.566	0.2924	-0.0035		2.39195	2.92108	-0.0709939
58600	4.58	0.2932	-0.0039		2.39928	2.92907	-0.0791075
58800	4.588	0.2937	-0.004		2.40348	2.93407	-0.0811359
59000	4.604	0.2945	-0.0041		2.41186	2.94206	-0.0831643
59200	4.626	0.2953	-0.0044		2.42338	2.95005	-0.0892495
59400	4.648	0.2961	-0.0045		2.43491	2.95804	-0.0912779
59600	4.678	0.297	-0.0047		2.45062	2.96703	-0.0953347
59800	4.71	0.2978	-0.0047		2.46739	2.97502	-0.0953347
60000	4.742	0.2989	-0.0048		2.48415	2.98601	-0.0973631
60200	4.78	0.3001	-0.0051		2.50406	2.998	-0.103448
60400	4.816	0.3013	-0.0052		2.52292	3.00999	-0.105477
60600	4.854	0.3023	-0.0054		2.54282	3.01998	-0.109533
60800	4.888	0.3034	-0.0055		2.56063	3.03097	-0.111562
61000	4.924	0.3047	-0.0059		2.57949	3.04396	-0.119675
61200	4.952	0.3056	-0.0061		2.59416	3.05295	-0.123732
61400	4.984	0.3065	-0.0062		2.61092	3.06194	-0.125761
61600	5.016	0.3075	-0.0064		2.62769	3.07193	-0.129817
61800	5.048	0.3084	-0.0065		2.64445	3.08092	-0.131846
62000	5.084	0.3095	-0.0067		2.66331	3.09191	-0.135903
62200	5.112	0.3104	-0.0069		2.67798	3.1009	-0.139959
62400	5.146	0.3115	-0.007		2.69579	3.11189	-0.141988
62600	5.182	0.3126	-0.0071		2.71465	3.12288	-0.144016
62800	5.212	0.3136	-0.0074		2.73036	3.13287	-0.150101
63000	5.246	0.3145	-0.0076		2.74818	3.14186	-0.154158
63200	5.276	0.3154	-0.0078		2.76389	3.15085	-0.158215
63400	5.306	0.3165	-0.0079		2.77961	3.16184	-0.160243
63600	5.338	0.3175	-0.0081		2.79637	3.17183	-0.1643
63800	5.37	0.3184	-0.008		2.81313	3.18082	-0.162272
64000	5.402	0.3194	-0.0082		2.8299	3.19081	-0.166329
64200	5.436	0.3203	-0.0084		2.84771	3.1998	-0.170385
64400	5.47	0.3213	-0.0087		2.86552	3.20979	-0.176471
64600	5.502	0.3223	-0.009		2.88228	3.21978	-0.182556
64800	5.536	0.3233	-0.0091		2.9001	3.22977	-0.184584
65000	5.57	0.3243	-0.0093		2.91791	3.23976	-0.188641
65200	5.602	0.3253	-0.0093		2.93467	3.24975	-0.188641
65400	5.638	0.3262	-0.0096		2.95353	3.25874	-0.194726
65600	5.672	0.3271	-0.0098		2.97134	3.26773	-0.198783
65800	5.714	0.3281	-0.01		2.99334	3.27772	-0.20284
66000	5.75	0.3293	-0.0102		3.0122	3.28971	-0.206897
66200	5.786	0.3302	-0.0104		3.03106	3.2987	-0.210953
66400	5.82	0.3313	-0.0106		3.04887	3.30969	-0.21501
66600	5.856	0.3322	-0.0108		3.06773	3.31868	-0.219067
66800	5.892	0.3333	-0.011		3.08659	3.32967	-0.223124
67000	5.928	0.3343	-0.0112		3.10545	3.33966	-0.227181
67200	5.962	0.3353	-0.0113		3.12326	3.34965	-0.229209
67400	6.002	0.3363	-0.0115		3.14422	3.35964	-0.233266
67600	6.04	0.3374	-0.0117		3.16412	3.37063	-0.237323
67800	6.076	0.3384	-0.0119		3.18298	3.38062	-0.241379
68000	6.116	0.3394	-0.0121		3.20394	3.39061	-0.245436
68200	6.148	0.3404	-0.0123		3.2207	3.4006	-0.249493
68400	6.186	0.3414	-0.0125		3.24061	3.41059	-0.25355
68600	6.224	0.3423	-0.0127		3.26051	3.41958	-0.257606
68800	6.26	0.3434	-0.0129		3.27937	3.43057	-0.261663
69000	6.3	0.3443	-0.0131		3.30033	3.43956	-0.26572
69200	6.342	0.3454	-0.0132		3.32233	3.45055	-0.267748
69400	6.38	0.3464	-0.0134		3.34223	3.46054	-0.271805
69600	6.42	0.3475	-0.0137		3.36319	3.47153	-0.27789
69800	6.46	0.3485	-0.0139		3.38414	3.48152	-0.281947
70000	6.498	0.3495	-0.0141		3.40405	3.49151	-0.286004
70200	6.538	0.3505	-0.0143		3.425	3.5015	-0.290061
70400	6.576	0.3516	-0.0145		3.44491	3.51249	-0.294118
70600	6.614	0.3526	-0.0145		3.46482	3.52248	-0.294118
70800	6.652	0.3536	-0.0148		3.48473	3.53247	-0.300203
71000	6.686	0.3545	-0.0149		3.50254	3.54146	-0.302231
71200	6.724	0.3554	-0.0151		3.52244	3.55045	-0.306288
71400	6.76	0.3564	-0.0153		3.5413	3.56044	-0.310345
71600	6.8	0.3575	-0.0154		3.56226	3.57143	-0.312373
71800	6.838	0.3585	-0.0157		3.58216	3.58142	-0.318458
72000	6.876	0.3593	-0.0158		3.60207	3.58941	-0.320487
72200	6.912	0.3603	-0.0159		3.62093	3.5994	-0.322515
72400	6.952	0.3612	-0.016		3.64188	3.60839	-0.324544
72600	6.992	0.3624	-0.0163		3.66284	3.62038	-0.330629
72800	7.034	0.3633	-0.0165		3.68484	3.62937	-0.334686
73000	7.07	0.3642	-0.0167		3.7037	3.63836	-0.338742
73200	7.108	0.3652	-0.0168		3.72361	3.64835	-0.340771
73400	7.148	0.3662	-0.0171		3.74456	3.65834	-0.346856
73600	7.188	0.3672	-0.0173		3.76551	3.66833	-0.350913
73800	7.228	0.3683	-0.0174		3.78647	3.67932	-0.352941
74000	7.268	0.3693	-0.0175		3.80742	3.68931	-0.35497
74200	7.312	0.3702	-0.0176		3.83047	3.6983	-0.356998
74400	7.35	0.3713	-0.0177		3.85038	3.70929	-0.359026
74600	7.388	0.3722	-0.018		3.87029	3.71828	-0.365112
74800	7.428	0.3733	-0.0181		3.89124	3.72927	-0.36714
75000	7.468	0.3742	-0.0184		3.9122	3.73826	-0.373225
75200	7.51	0.375	-0.0185		3.9342	3.74625	-0.375254
75400	7.548	0.3761	-0.0187		3.9541	3.75724	-0.37931
75600	7.592	0.3772	-0.0189		3.97715	3.76823	-0.383367
75800	7.634	0.3782	-0.0191		3.99916	3.77822	-0.387424
76000	7.674	0.3794	-0.0193		4.02011	3.79021	-0.391481
76200	7.714	0.3803	-0.0194		4.04107	3.7992	-0.393509
76400	7.758	0.3813	-0.0196		4.06412	3.80919	-0.397566
76600	7.8	0.3823	-0.0198		4.08612	3.81918	-0.401623
76800	7.838	0.3832	-0.0198		4.10602	3.82817	-0.401623
77000	7.878	0.3842	-0.0202		4.12698	3.83816	-0.409736
77200	7.918	0.3852	-0.0203		4.14793	3.84815	-0.411765
77400	7.956	0.3862	-0.0203		4.16784	3.85814	-0.411765
77600	8	0.3871	-0.0204		4.19089	3.86713	-0.413793
77800	8.04	0.3881	-0.0205		4.21184	3.87712	-0.415822
78000	8.084	0.3891	-0.0207		4.23489	3.88711	-0.419878
78200	8.124	0.3902	-0.0209		4.25585	3.8981	-0.423935
78400	8.168	0.3909	-0.021		4.2789	3.90509	-0.425963
78600	8.218	0.392	-0.0212		4.30509	3.91608	-0.43002
78800	8.264	0.3929	-0.0213		4.32919	3.92507	-0.432049
79000	8.306	0.3941	-0.0215		4.35119	3.93706	-0.436105
79200	8.352	0.395	-0.0217		4.37529	3.94605	-0.440162
79400	8.4	0.396	-0.0218		4.40043	3.95604	-0.442191
79600	8.444	0.3972	-0.0219		4.42348	3.96803	-0.444219
79800	8.494	0.3982	-0.0221		4.44968	3.97802	-0.448276
80000	8.54	0.3992	-0.0222		4.47378	3.98801	-0.450304
80200	8.584	0.4001	-0.0224		4.49683	3.997	-0.454361
80400	8.628	0.4011	-0.0225		4.51987	4.00699	-0.456389
80600	8.674	0.4022	-0.0227		4.54397	4.01798	-0.460446
80800	8.722	0.4032	-0.0228		4.56912	4.02797	-0.462475
81000	8.768	0.4041	-0.023		4.59322	4.03696	-0.466531
81200	8.812	0.4052	-0.0231		4.61627	4.04795	-0.46856
81400	8.856	0.4061	-0.0232		4.63932	4.05694	-0.470588
81600	8.904	0.4071	-0.0234		4.66446	4.06693	-0.474645
81800	8.946	0.4081	-0.0235		4.68646	4.07692	-0.476673
82000	8.992	0.409	-0.0237		4.71056	4.08591	-0.48073
82200	9.038	0.41	-0.0237		4.73466	4.0959	-0.48073
82400	9.084	0.411	-0.0239		4.75876	4.10589	-0.484787
82600	9.128	0.412	-0.0241		4.78181	4.11588	-0.488844
82800	9.172	0.413	-0.0242		4.80486	4.12587	-0.490872
83000	9.22	0.4139	-0.0243		4.83	4.13487	-0.492901
83200	9.27	0.415	-0.0245		4.85619	4.14585	-0.496957
83400	9.318	0.416	-0.0246		4.88134	4.15584	-0.498986
83600	9.368	0.417	-0.0247		4.90753	4.16583	-0.501014
83800	9.416	0.418	-0.0249		4.93268	4.17582	-0.505071
84000	9.47	0.419	-0.025		4.96097	4.18581	-0.507099
84200	9.518	0.42	-0.0251		4.98611	4.1958	-0.509128
84400	9.568	0.421	-0.0253		5.0123	4.20579	-0.513185
84600	9.62	0.422	-0.0253		5.03955	4.21578	-0.513185
84800	9.668	0.4231	-0.0257		5.06469	4.22677	-0.521298
85000	9.718	0.424	-0.0257		5.09088	4.23576	-0.521298
85200	9.766	0.4251	-0.0259		5.11603	4.24675	-0.525355
85400	9.816	0.4261	-0.0261		5.14222	4.25674	-0.529412
85600	9.864	0.4271	-0.0262		5.16737	4.26673	-0.53144
85800	9.916	0.4281	-0.0263		5.19461	4.27672	-0.533469
86000	9.964	0.4291	-0.0265		5.21975	4.28671	-0.537525
86200	10.016	0.43	-0.0266		5.24699	4.2957	-0.539554
86400	10.064	0.431	-0.0268		5.27214	4.30569	-0.543611
86600	10.116	0.4321	-0.027		5.29938	4.31668	-0.547667
86800	10.162	0.433	-0.0271		5.32348	4.32567	-0.549696
87000	10.218	0.4341	-0.0273		5.35281	4.33666	-0.553753
87200	10.266	0.435	-0.0274		5.37796	4.34565	-0.555781
87400	10.314	0.436	-0.0275		5.4031	4.35564	-0.557809
87600	10.366	0.437	-0.0274		5.43035	4.36563	-0.555781
87800	10.414	0.4379	-0.0277		5.45549	4.37463	-0.561866
88000	10.466	0.439	-0.0278		5.48273	4.38561	-0.563895
88200	10.52	0.4399	-0.0278		5.51102	4.39461	-0.563895
88400	10.574	0.441	-0.028		5.53931	4.40559	-0.567951
88600	10.634	0.4418	-0.0281		5.57074	4.41359	-0.56998
88800	10.706	0.4431	-0.0283		5.60846	4.42657	-0.574037
89000	10.766	0.4443	-0.0284		5.63989	4.43856	-0.576065
89200	10.826	0.4454	-0.0287		5.67132	4.44955	-0.58215
89400	10.886	0.4465	-0.0287		5.70275	4.46054	-0.58215
89600	10.942	0.4476	-0.0289		5.73209	4.47153	-0.586207
89800	10.996	0.4486	-0.029		5.76038	4.48152	-0.588235
90000	11.048	0.4496	-0.0291		5.78762	4.49151	-0.590264
90200	11.098	0.4505	-0.0291		5.81381	4.5005	-0.590264
90400	11.152	0.4515	-0.0293		5.8421	4.51049	-0.59432
90600	11.206	0.4525	-0.0293		5.87039	4.52048	-0.59432
90800	11.256	0.4534	-0.0296		5.89658	4.52947	-0.600406
91000	11.31	0.4543	-0.0296		5.92487	4.53846	-0.600406
91200	11.366	0.4552	-0.0298		5.95421	4.54745	-0.604462
91400	11.42	0.4563	-0.0298		5.9825	4.55844	-0.604462
91600	11.478	0.4573	-0.0299		6.01288	4.56843	-0.606491
91800	11.528	0.4582	-0.0301		6.03907	4.57742	-0.610548
92000	11.584	0.4592	-0.0301		6.06841	4.58741	-0.610548
92200	11.634	0.4601	-0.0303		6.0946	4.5964	-0.614604
92400	11.69	0.4611	-0.0303		6.12394	4.60639	-0.614604
92600	11.746	0.462	-0.0305		6.15327	4.61538	-0.618661
92800	11.802	0.4631	-0.0305		6.18261	4.62637	-0.618661
93000	11.862	0.464	-0.0306		6.21404	4.63536	-0.62069
93200	11.922	0.4651	-0.0307		6.24547	4.64635	-0.622718
93400	11.984	0.466	-0.0309		6.27795	4.65534	-0.626775
93600	12.04	0.4671	-0.0308		6.30729	4.66633	-0.624746
93800	12.092	0.468	-0.0308		6.33453	4.67532	-0.624746
94000	12.148	0.469	-0.0309		6.36387	4.68531	-0.626775
94200	12.208	0.47	-0.031		6.3953	4.6953	-0.628803
94400	12.262	0.471	-0.0311		6.42359	4.70529	-0.630832
94600	12.318	0.472	-0.031		6.45292	4.71528	-0.628803
94800	12.378	0.473	-0.0313		6.48435	4.72527	-0.634888
95000	12.432	0.4739	-0.0313		6.51264	4.73427	-0.634888
95200	12.488	0.4748	-0.0312		6.54198	4.74326	-0.63286
95400	12.55	0.4758	-0.0313		6.57446	4.75325	-0.634888
95600	12.61	0.4767	-0.0315		6.60589	4.76224	-0.638945
95800	12.67	0.4779	-0.0317		6.63732	4.77423	-0.643002
96000	12.732	0.4788	-0.0319		6.6698	4.78322	-0.647059
96200	12.81	0.4801	-0.0319		6.71066	4.7962	-0.647059
96400	12.888	0.4812	-0.032		6.75152	4.80719	-0.649087
96600	12.958	0.4824	-0.0322		6.78819	4.81918	-0.653144
96800	13.02	0.4834	-0.0322		6.82067	4.82917	-0.653144
97000	13.088	0.4844	-0.0322		6.8563	4.83916	-0.653144
97200	13.152	0.4854	-0.0323		6.88982	4.84915	-0.655172
97400	13.218	0.4865	-0.0323		6.9244	4.86014	-0.655172
97600	13.28	0.4874	-0.0324		6.95688	4.86913	-0.657201
97800	13.338	0.4885	-0.0325		6.98726	4.88012	-0.659229
98000	13.402	0.4895	-0.0326		7.02079	4.89011	-0.661258
98200	13.462	0.4905	-0.0326		7.05222	4.9001	-0.661258
98400	13.522	0.4914	-0.0326		7.08365	4.90909	-0.661258
98600	13.578	0.4924	-0.0327		7.11299	4.91908	-0.663286
98800	13.638	0.4934	-0.0328		7.14442	4.92907	-0.665314
99000	13.7	0.4943	-0.0329		7.1769	4.93806	-0.667343
99200	13.756	0.4953	-0.033		7.20624	4.94805	-0.669371
99400	13.814	0.4962	-0.033		7.23662	4.95704	-0.669371
99600	13.874	0.4972	-0.0331		7.26805	4.96703	-0.6714
99800	13.934	0.4982	-0.0332		7.29948	4.97702	-0.673428
100000	13.996	0.4992	-0.0332		7.33196	4.98701	-0.673428
100200	14.056	0.5001	-0.0333		7.36339	4.996	-0.675456
100400	14.116	0.5011	-0.0332		7.39483	5.00599	-0.673428
100600	14.176	0.5021	-0.0333		7.42626	5.01598	-0.675456
100800	14.238	0.5031	-0.0333		7.45874	5.02597	-0.675456
101000	14.298	0.504	-0.0335		7.49017	5.03497	-0.679513
101200	14.36	0.5052	-0.0335		7.52265	5.04695	-0.679513
101400	14.418	0.5059	-0.0335		7.55303	5.05395	-0.679513
101600	14.484	0.507	-0.0336		7.58761	5.06494	-0.681542
101800	14.542	0.508	-0.0336		7.61799	5.07493	-0.681542
102000	14.606	0.509	-0.0337		7.65152	5.08492	-0.68357
102200	14.67	0.5098	-0.0337		7.68504	5.09291	-0.68357
102400	14.734	0.5108	-0.0338		7.71857	5.1029	-0.685598
102600	14.796	0.5117	-0.0338		7.75105	5.11189	-0.685598
102800	14.858	0.5126	-0.0338		7.78353	5.12088	-0.685598
103000	14.918	0.5139	-0.0338		7.81496	5.13387	-0.685598
103200	14.978	0.5149	-0.0338		7.84639	5.14386	-0.685598
103400	15.036	0.5157	-0.0338		7.87678	5.15185	-0.685598
103600	15.102	0.5167	-0.0339		7.91135	5.16184	-0.687627
103800	15.174	0.5177	-0.034		7.94907	5.17183	-0.689655
104000	15.242	0.5188	-0.034		7.98469	5.18282	-0.689655
104200	15.314	0.5199	-0.0339		8.02241	5.19381	-0.687627
104400	15.386	0.521	-0.0341		8.06013	5.2048	-0.691684
104600	15.456	0.522	-0.034		8.0968	5.21479	-0.689655
104800	15.522	0.5231	-0.034		8.13137	5.22577	-0.689655
105000	15.588	0.524	-0.0341		8.16595	5.23477	-0.691684
105200	15.652	0.5251	-0.0342		8.19948	5.24575	-0.693712
105400	15.72	0.5261	-0.0341		8.2351	5.25574	-0.691684
105600	15.786	0.527	-0.0342		8.26967	5.26474	-0.693712
105800	15.848	0.5281	-0.0341		8.30215	5.27572	-0.691684
106000	15.912	0.529	-0.0342		8.33568	5.28472	-0.693712
106200	15.976	0.5302	-0.0342		8.36921	5.2967	-0.693712
106400	16.038	0.531	-0.0343		8.40169	5.3047	-0.69574
106600	16.104	0.532	-0.0343		8.43626	5.31469	-0.69574
106800	16.166	0.5331	-0.0343		8.46874	5.32567	-0.69574
107000	16.232	0.5339	-0.0343		8.50332	5.33367	-0.69574
107200	16.292	0.5349	-0.0343		8.53475	5.34366	-0.69574
107400	16.358	0.5358	-0.0344		8.56932	5.35265	-0.697769
107600	16.422	0.5369	-0.0343		8.60285	5.36364	-0.69574
107800	16.488	0.5378	-0.0343		8.63742	5.37263	-0.69574
108000	16.548	0.5387	-0.0344		8.66886	5.38162	-0.697769
108200	16.614	0.5396	-0.0344		8.70343	5.39061	-0.697769
108400	16.678	0.5407	-0.0344		8.73696	5.4016	-0.697769
108600	16.744	0.5417	-0.0343		8.77153	5.41159	-0.69574
108800	16.808	0.5427	-0.0344		8.80506	5.42158	-0.697769
109000	16.872	0.5436	-0.0344		8.83859	5.43057	-0.697769
109200	16.934	0.5445	-0.0344		8.87107	5.43956	-0.697769
109400	17.004	0.5455	-0.0344		8.90774	5.44955	-0.697769
109600	17.074	0.5465	-0.0344		8.94441	5.45954	-0.697769
109800	17.144	0.5476	-0.0344		8.98108	5.47053	-0.697769
110000	17.214	0.5487	-0.0345		9.01775	5.48152	-0.699797
110200	17.284	0.5497	-0.0344		9.05442	5.49151	-0.697769
110400	17.35	0.5506	-0.0345		9.08899	5.5005	-0.699797
110600	17.416	0.5517	-0.0345		9.12357	5.51149	-0.699797
110800	17.486	0.5526	-0.0345		9.16024	5.52048	-0.699797
111000	17.55	0.5536	-0.0345		9.19377	5.53047	-0.699797
111200	17.62	0.5546	-0.0345		9.23044	5.54046	-0.699797
111400	17.686	0.5556	-0.0345		9.26501	5.55045	-0.699797
111600	17.76	0.5567	-0.0345		9.30378	5.56144	-0.699797
111800	17.834	0.5576	-0.0344		9.34254	5.57043	-0.697769
112000	17.904	0.5589	-0.0344		9.37921	5.58342	-0.697769
112200	17.974	0.5599	-0.0345		9.41588	5.59341	-0.699797
112400	18.042	0.5609	-0.0345		9.4515	5.6034	-0.699797
112600	18.114	0.562	-0.0345		9.48922	5.61439	-0.699797
112800	18.184	0.5629	-0.0345		9.52589	5.62338	-0.699797
113000	18.256	0.5638	-0.0345		9.56361	5.63237	-0.699797
113200	18.324	0.565	-0.0345		9.59923	5.64436	-0.699797
113400	18.386	0.5659	-0.0345		9.63171	5.65335	-0.699797
113600	18.456	0.5668	-0.0345		9.66838	5.66234	-0.699797
113800	18.53	0.5679	-0.0346		9.70715	5.67333	-0.701826
114000	18.6	0.569	-0.0345		9.74382	5.68432	-0.699797
114200	18.67	0.57	-0.0346		9.78049	5.69431	-0.701826
114400	18.74	0.571	-0.0346		9.81716	5.7043	-0.701826
114600	18.806	0.5719	-0.0346		9.85173	5.71329	-0.701826
114800	18.876	0.573	-0.0345		9.88841	5.72428	-0.699797
115000	18.94	0.574	-0.0346		9.92193	5.73427	-0.701826
115200	19.01	0.575	-0.0345		9.9586	5.74426	-0.699797
115400	19.076	0.5759	-0.0346		9.99318	5.75325	-0.701826
115600	19.142	0.5769	-0.0346		10.0278	5.76324	-0.701826
115800	19.206	0.5779	-0.0345		10.0613	5.77323	-0.699797
116000	19.274	0.5788	-0.0346		10.0969	5.78222	-0.701826
116200	19.338	0.5799	-0.0346		10.1304	5.79321	-0.701826
116400	19.4	0.5808	-0.0346		10.1629	5.8022	-0.701826
116600	19.466	0.582	-0.0345		10.1975	5.81419	-0.699797
116800	19.53	0.5828	-0.0346		10.231	5.82218	-0.701826
117000	19.598	0.5838	-0.0346		10.2666	5.83217	-0.701826
117200	19.664	0.5848	-0.0346		10.3012	5.84216	-0.701826
117400	19.732	0.5857	-0.0346		10.3368	5.85115	-0.701826
117600	19.8	0.5867	-0.0346		10.3725	5.86114	-0.701826
117800	19.866	0.5878	-0.0346		10.407	5.87213	-0.701826
118000	19.932	0.5887	-0.0347		10.4416	5.88112	-0.703854
118200	20.004	0.5896	-0.0346		10.4793	5.89011	-0.701826
118400	20.072	0.5906	-0.0346		10.5149	5.9001	-0.701826
118600	20.15	0.5917	-0.0346		10.5558	5.91109	-0.701826
118800	20.228	0.5927	-0.0347		10.5967	5.92108	-0.703854
119000	20.302	0.5939	-0.0346		10.6354	5.93307	-0.701826
119200	20.374	0.5948	-0.0347		10.6731	5.94206	-0.703854
119400	20.442	0.596	-0.0347		10.7088	5.95405	-0.703854
119600	20.51	0.5969	-0.0347		10.7444	5.96304	-0.703854
119800	20.576	0.5979	-0.0347		10.779	5.97303	-0.703854
120000	20.646	0.5989	-0.0346		10.8156	5.98302	-0.701826
120200	20.714	0.5998	-0.0347		10.8513	5.99201	-0.703854
120400	20.78	0.6008	-0.0347		10.8858	6.002	-0.703854
120600	20.85	0.6018	-0.0347		10.9225	6.01199	-0.703854
120800	20.92	0.6028	-0.0346		10.9592	6.02198	-0.701826
121000	20.986	0.604	-0.0347		10.9938	6.03397	-0.703854
121200	21.052	0.6048	-0.0348		11.0283	6.04196	-0.705882
121400	21.118	0.6058	-0.0347		11.0629	6.05195	-0.703854
121600	21.186	0.6069	-0.0346		11.0985	6.06294	-0.701826
121800	21.254	0.6078	-0.0347		11.1341	6.07193	-0.703854
122000	21.32	0.6088	-0.0347		11.1687	6.08192	-0.703854
122200	21.384	0.6098	-0.0347		11.2022	6.09191	-0.703854
122400	21.45	0.6108	-0.0347		11.2368	6.1019	-0.703854
122600	21.514	0.6116	-0.0347		11.2704	6.10989	-0.703854
122800	21.582	0.6127	-0.0347		11.306	6.12088	-0.703854
123000	21.65	0.6137	-0.0347		11.3416	6.13087	-0.703854
123200	21.718	0.6146	-0.0347		11.3772	6.13986	-0.703854
123400	21.784	0.6157	-0.0347		11.4118	6.15085	-0.703854
123600	21.856	0.6167	-0.0347		11.4495	6.16084	-0.703854
123800	21.926	0.6174	-0.0348		11.4862	6.16783	-0.705882
124000	22	0.6186	-0.0348		11.5249	6.17982	-0.705882
124200	22.076	0.6196	-0.0347		11.5648	6.18981	-0.703854
124400	22.154	0.6207	-0.0347		11.6056	6.2008	-0.703854
124600	22.228	0.6217	-0.0348		11.6444	6.21079	-0.705882
124800	22.304	0.6228	-0.0348		11.6842	6.22178	-0.705882
125000	22.374	0.6238	-0.0348		11.7209	6.23177	-0.705882
125200	22.444	0.6248	-0.0347		11.7575	6.24176	-0.703854
125400	22.512	0.6259	-0.0348		11.7932	6.25275	-0.705882
125600	22.58	0.6268	-0.0348		11.8288	6.26174	-0.705882
125800	22.648	0.6279	-0.0348		11.8644	6.27273	-0.705882
126000	22.718	0.6288	-0.0348		11.9011	6.28172	-0.705882
126200	22.784	0.6297	-0.0347		11.9357	6.29071	-0.703854
126400	22.848	0.6308	-0.0348		11.9692	6.3017	-0.705882
126600	22.92	0.6318	-0.0347		12.0069	6.31169	-0.703854
126800	22.992	0.6328	-0.0348		12.0446	6.32168	-0.705882
127000	23.06	0.6338	-0.0347		12.0802	6.33167	-0.703854
127200	23.128	0.6348	-0.0348		12.1159	6.34166	-0.705882
127400	23.196	0.6357	-0.0347		12.1515	6.35065	-0.703854
127600	23.262	0.6367	-0.0347		12.1861	6.36064	-0.703854
127800	23.326	0.6377	-0.0347		12.2196	6.37063	-0.703854
128000	23.394	0.6388	-0.0347		12.2552	6.38162	-0.703854
128200	23.456	0.6394	-0.0346		12.2877	6.38761	-0.701826
128400	23.522	0.6406	-0.0347		12.3223	6.3996	-0.703854
128600	23.592	0.6416	-0.0347		12.3589	6.40959	-0.703854
128800	23.658	0.6425	-0.0347		12.3935	6.41858	-0.703854
129000	23.728	0.6435	-0.0347		12.4302	6.42857	-0.703854
129200	23.794	0.6443	-0.0347		12.4648	6.43656	-0.703854
129400	23.864	0.6454	-0.0347		12.5014	6.44755	-0.703854
129600	23.932	0.6465	-0.0345		12.537	6.45854	-0.699797
129800	24.002	0.6476	-0.0347		12.5737	6.46953	-0.703854
130000	24.068	0.6485	-0.0346		12.6083	6.47852	-0.701826
130200	24.136	0.6496	-0.0346		12.6439	6.48951	-0.701826
130400	24.208	0.6505	-0.0347		12.6816	6.4985	-0.703854
130600	24.278	0.6515	-0.0346		12.7183	6.50849	-0.701826
130800	24.346	0.6525	-0.0347		12.7539	6.51848	-0.703854
131000	24.418	0.6535	-0.0346		12.7916	6.52847	-0.701826
131200	24.486	0.6544	-0.0346		12.8273	6.53746	-0.701826
131400	24.554	0.6554	-0.0345		12.8629	6.54745	-0.699797
131600	24.626	0.6565	-0.0347		12.9006	6.55844	-0.703854
131800	24.696	0.6575	-0.0346		12.9373	6.56843	-0.701826
132000	24.768	0.6585	-0.0346		12.975	6.57842	-0.701826
132200	24.836	0.6595	-0.0346		13.0106	6.58841	-0.701826
132400	24.906	0.6605	-0.0345		13.0473	6.5984	-0.699797
132600	24.978	0.6617	-0.0346		13.085	6.61039	-0.701826
132800	25.044	0.6626	-0.0345		13.1196	6.61938	-0.699797
133000	25.112	0.6636	-0.0346		13.1552	6.62937	-0.701826
133200	25.182	0.6646	-0.0345		13.1919	6.63936	-0.699797
133400	25.254	0.6655	-0.0345		13.2296	6.64835	-0.699797
133600	25.32	0.6665	-0.0344		13.2642	6.65834	-0.697769
133800	25.388	0.6675	-0.0345		13.2998	6.66833	-0.699797
134000	25.456	0.6685	-0.0345		13.3354	6.67832	-0.699797
134200	25.522	0.6696	-0.0344		13.37	6.68931	-0.697769
134400	25.59	0.6706	-0.0345		13.4056	6.6993	-0.699797
134600	25.656	0.6714	-0.0344		13.4402	6.70729	-0.697769
134800	25.732	0.6725	-0.0344		13.48	6.71828	-0.697769
135000	25.802	0.6736	-0.0344		13.5167	6.72927	-0.697769
135200	25.872	0.6745	-0.0344		13.5533	6.73826	-0.697769
135400	25.946	0.6756	-0.0344		13.5921	6.74925	-0.697769
135600	26.016	0.6767	-0.0344		13.6288	6.76024	-0.697769
135800	26.092	0.6776	-0.0344		13.6686	6.76923	-0.697769
136000	26.16	0.6788	-0.0344		13.7042	6.78122	-0.697769
136200	26.23	0.6797	-0.0343		13.7409	6.79021	-0.69574
136400	26.302	0.6806	-0.0342		13.7786	6.7992	-0.693712
136600	26.372	0.6817	-0.0344		13.8153	6.81019	-0.697769
136800	26.442	0.6827	-0.0343		13.8519	6.82018	-0.69574
137000	26.51	0.6838	-0.0343		13.8876	6.83117	-0.69574
137200	26.58	0.6848	-0.0343		13.9242	6.84116	-0.69574
137400	26.648	0.6858	-0.0342		13.9599	6.85115	-0.693712
137600	26.716	0.6868	-0.034		13.9955	6.86114	-0.689655
137800	26.782	0.6878	-0.034		14.0301	6.87113	-0.689655
138000	26.844	0.6887	-0.0342		14.0625	6.88012	-0.693712
138200	26.91	0.6897	-0.034		14.0971	6.89011	-0.689655
138400	26.978	0.6907	-0.0342		14.1327	6.9001	-0.693712
138600	27.044	0.6917	-0.0342		14.1673	6.91009	-0.693712
138800	27.108	0.6926	-0.0342		14.2008	6.91908	-0.693712
139000	27.176	0.6935	-0.0342		14.2365	6.92807	-0.693712
139200	27.242	0.6946	-0.0341		14.271	6.93906	-0.691684
139400	27.308	0.6956	-0.0341		14.3056	6.94905	-0.691684
139600	27.366	0.6966	-0.0341		14.336	6.95904	-0.691684
139800	27.43	0.6975	-0.0341		14.3695	6.96803	-0.691684
140000	27.498	0.6986	-0.034		14.4051	6.97902	-0.689655
140200	27.566	0.6994	-0.034		14.4408	6.98701	-0.689655
140400	27.636	0.7004	-0.034		14.4774	6.997	-0.689655
140600	27.708	0.7014	-0.0341		14.5151	7.00699	-0.691684
140800	27.784	0.7025	-0.034		14.555	7.01798	-0.689655
141000	27.862	0.7036	-0.034		14.5958	7.02897	-0.689655
141200	27.932	0.7047	-0.034		14.6325	7.03996	-0.689655
141400	28.002	0.7057	-0.034		14.6692	7.04995	-0.689655
141600	28.074	0.7067	-0.034		14.7069	7.05994	-0.689655
141800	28.144	0.7078	-0.034		14.7436	7.07093	-0.689655
142000	28.212	0.7088	-0.034		14.7792	7.08092	-0.689655
142200	28.276	0.7097	-0.034		14.8127	7.08991	-0.689655
142400	28.344	0.7107	-0.0339		14.8483	7.0999	-0.687627
142600	28.41	0.7118	-0.034		14.8829	7.11089	-0.689655
142800	28.474	0.7127	-0.0339		14.9164	7.11988	-0.687627
143000	28.536	0.7137	-0.0339		14.9489	7.12987	-0.687627
143200	28.602	0.7147	-0.0339		14.9835	7.13986	-0.687627
143400	28.664	0.7156	-0.0338		15.016	7.14885	-0.685598
143600	28.726	0.7167	-0.0338		15.0484	7.15984	-0.685598
143800	28.788	0.7175	-0.0338		15.0809	7.16783	-0.685598
144000	28.854	0.7184	-0.0338		15.1155	7.17682	-0.685598
144200	28.918	0.7194	-0.0338		15.149	7.18681	-0.685598
144400	28.984	0.7204	-0.0336		15.1836	7.1968	-0.681542
144600	29.054	0.7215	-0.0337		15.2203	7.20779	-0.68357
144800	29.12	0.7225	-0.0337		15.2548	7.21778	-0.68357
145000	29.194	0.7235	-0.0336		15.2936	7.22777	-0.681542
145200	29.266	0.7245	-0.0336		15.3313	7.23776	-0.681542
145400	29.336	0.7255	-0.0336		15.368	7.24775	-0.681542
145600	29.406	0.7264	-0.0336		15.4047	7.25674	-0.681542
145800	29.472	0.7273	-0.0334		15.4392	7.26573	-0.677485
146000	29.544	0.7284	-0.0335		15.477	7.27672	-0.679513
146200	29.614	0.7294	-0.0336		15.5136	7.28671	-0.681542
146400	29.68	0.7306	-0.0335		15.5482	7.2987	-0.679513
146600	29.746	0.7314	-0.0335		15.5828	7.30669	-0.679513
146800	29.818	0.7325	-0.0334		15.6205	7.31768	-0.677485
147000	29.882	0.7336	-0.0334		15.654	7.32867	-0.677485
147200	29.948	0.7345	-0.0332		15.6886	7.33766	-0.673428
147400	30.018	0.7355	-0.0332		15.7253	7.34765	-0.673428
147600	30.08	0.7364	-0.0333		15.7577	7.35664	-0.675456
147800	30.148	0.7374	-0.0334		15.7934	7.36663	-0.677485
148000	30.214	0.7385	-0.0333		15.8279	7.37762	-0.675456
148200	30.292	0.7394	-0.0333		15.8688	7.38661	-0.675456
148400	30.374	0.7405	-0.0333		15.9118	7.3976	-0.675456
148600	30.45	0.7416	-0.0333		15.9516	7.40859	-0.675456
148800	30.526	0.7427	-0.0333		15.9914	7.41958	-0.675456
149000	30.596	0.7437	-0.0332		16.0281	7.42957	-0.673428
149200	30.67	0.7447	-0.0332		16.0668	7.43956	-0.673428
149400	30.74	0.7458	-0.0331		16.1035	7.45055	-0.6714
149600	30.804	0.7468	-0.0332		16.137	7.46054	-0.673428
149800	30.874	0.7478	-0.033		16.1737	7.47053	-0.669371
150000	30.936	0.7488	-0.0332		16.2062	7.48052	-0.673428
150200	31.002	0.7498	-0.0332		16.2407	7.49051	-0.673428
150400	31.066	0.7508	-0.0332		16.2743	7.5005	-0.673428
150600	31.13	0.7517	-0.0332		16.3078	7.50949	-0.673428
150800	31.192	0.7528	-0.0332		16.3403	7.52048	-0.673428
151000	31.26	0.7536	-0.0331		16.3759	7.52847	-0.6714
151200	31.322	0.7546	-0.0332		16.4084	7.53846	-0.673428
151400	31.388	0.7556	-0.0331		16.443	7.54845	-0.6714
151600	31.452	0.7566	-0.0331		16.4765	7.55844	-0.6714
151800	31.516	0.7576	-0.033		16.51	7.56843	-0.669371
152000	31.58	0.7585	-0.033		16.5435	7.57742	-0.669371
152200	31.644	0.7595	-0.0331		16.5771	7.58741	-0.6714
152400	31.712	0.7605	-0.033		16.6127	7.5974	-0.669371
152600	31.782	0.7615	-0.033		16.6494	7.60739	-0.669371
152800	31.848	0.7625	-0.033		16.6839	7.61738	-0.669371
153000	31.91	0.7633	-0.033		16.7164	7.62537	-0.669371
153200	31.982	0.7643	-0.0329		16.7541	7.63536	-0.667343
153400	32.05	0.7653	-0.033		16.7898	7.64535	-0.669371
153600	32.114	0.7663	-0.0329		16.8233	7.65534	-0.667343
153800	32.182	0.7675	-0.0329		16.8589	7.66733	-0.667343
154000	32.25	0.7683	-0.0329		16.8945	7.67532	-0.667343
154200	32.314	0.7695	-0.0328		16.9281	7.68731	-0.665314
154400	32.384	0.7704	-0.0329		16.9647	7.6963	-0.667343
154600	32.448	0.7714	-0.0328		16.9983	7.70629	-0.665314
154800	32.516	0.7722	-0.0328		17.0339	7.71429	-0.665314
155000	32.582	0.7733	-0.0328		17.0684	7.72527	-0.665314
155200	32.65	0.7743	-0.0328		17.1041	7.73526	-0.665314
155400	32.72	0.7753	-0.0327		17.1407	7.74525	-0.663286
155600	32.792	0.7764	-0.0328		17.1785	7.75624	-0.665314
155800	32.868	0.7774	-0.0328		17.2183	7.76623	-0.665314
156000	32.94	0.7784	-0.0327		17.256	7.77622	-0.663286
156200	33.01	0.7796	-0.0327		17.2927	7.78821	-0.663286
156400	33.078	0.7806	-0.0327		17.3283	7.7982	-0.663286
156600	33.146	0.7816	-0.0327		17.3639	7.80819	-0.663286
156800	33.214	0.7825	-0.0327		17.3995	7.81718	-0.663286
157000	33.282	0.7835	-0.0326		17.4352	7.82717	-0.661258
157200	33.35	0.7845	-0.0326		17.4708	7.83716	-0.661258
157400	33.412	0.7855	-0.0326		17.5033	7.84715	-0.661258
157600	33.478	0.7865	-0.0323		17.5378	7.85714	-0.655172
157800	33.544	0.7875	-0.0323		17.5724	7.86713	-0.655172
158000	33.608	0.7885	-0.0323		17.6059	7.87712	-0.655172
158200	33.674	0.7895	-0.0323		17.6405	7.88711	-0.655172
158400	33.748	0.7905	-0.0323		17.6793	7.8971	-0.655172
158600	33.818	0.7915	-0.0322		17.7159	7.90709	-0.653144
158800	33.888	0.7925	-0.0322		17.7526	7.91708	-0.653144
159000	33.958	0.7936	-0.0322		17.7893	7.92807	-0.653144
159200	34.022	0.7945	-0.0322		17.8228	7.93706	-0.653144
159400	34.088	0.7955	-0.0321		17.8574	7.94705	-0.651116
159600	34.154	0.7965	-0.0322		17.892	7.95704	-0.653144
159800	34.222	0.7975	-0.0321		17.9276	7.96703	-0.651116
160000	34.286	0.7985	-0.0322		17.9611	7.97702	-0.653144
160200	34.348	0.7996	-0.032		17.9936	7.98801	-0.649087
160400	34.416	0.8003	-0.0321		18.0292	7.995	-0.651116
160600	34.486	0.8013	-0.0321		18.0659	8.005	-0.651116
160800	34.554	0.8024	-0.0319		18.1015	8.01598	-0.647059
161000	34.618	0.8034	-0.032		18.135	8.02597	-0.649087
161200	34.692	0.8044	-0.032		18.1738	8.03596	-0.649087
161400	34.76	0.8054	-0.0319		18.2094	8.04595	-0.647059
161600	34.83	0.8065	-0.0319		18.2461	8.05694	-0.647059
161800	34.9	0.8075	-0.0319		18.2828	8.06693	-0.647059
162000	34.968	0.8085	-0.0319		18.3184	8.07692	-0.647059
162200	35.036	0.8094	-0.0319		18.354	8.08591	-0.647059
162400	35.108	0.8105	-0.0318		18.3917	8.0969	-0.64503
162600	35.174	0.8116	-0.0319		18.4263	8.10789	-0.647059
162800	35.246	0.8125	-0.0318		18.464	8.11688	-0.64503
163000	35.312	0.8136	-0.0318		18.4986	8.12787	-0.64503
163200	35.374	0.8145	-0.0318		18.5311	8.13686	-0.64503
163400	35.44	0.8155	-0.0318		18.5656	8.14685	-0.64503
163600	35.502	0.8165	-0.0318		18.5981	8.15684	-0.64503
163800	35.57	0.8175	-0.0318		18.6337	8.16683	-0.64503
164000	35.632	0.8183	-0.0318		18.6662	8.17483	-0.64503
164200	35.696	0.8194	-0.0317		18.6998	8.18581	-0.643002
164400	35.764	0.8202	-0.0315		18.7354	8.19381	-0.638945
164600	35.832	0.8213	-0.0313		18.771	8.2048	-0.634888
164800	35.894	0.8223	-0.0313		18.8035	8.21479	-0.634888
165000	35.958	0.8232	-0.0313		18.837	8.22378	-0.634888
165200	36.026	0.8242	-0.0313		18.8726	8.23377	-0.634888
165400	36.092	0.8253	-0.0313		18.9072	8.24476	-0.634888
165600	36.162	0.8263	-0.0313		18.9439	8.25475	-0.634888
165800	36.24	0.8274	-0.0312		18.9847	8.26573	-0.63286
166000	36.314	0.8283	-0.0312		19.0235	8.27473	-0.63286
166200	36.39	0.8293	-0.0312		19.0633	8.28472	-0.63286
166400	36.46	0.8303	-0.0311		19.1	8.29471	-0.630832
166600	36.532	0.8315	-0.0311		19.1377	8.30669	-0.630832
166800	36.6	0.8325	-0.0311		19.1733	8.31668	-0.630832
167000	36.664	0.8336	-0.0311		19.2068	8.32767	-0.630832
167200	36.728	0.8345	-0.0312		19.2404	8.33666	-0.63286
167400	36.8	0.8356	-0.031		19.2781	8.34765	-0.628803
167600	36.87	0.8365	-0.0311		19.3148	8.35664	-0.630832
167800	36.942	0.8375	-0.031		19.3525	8.36663	-0.628803
168000	37.01	0.8385	-0.031		19.3881	8.37662	-0.628803
168200	37.078	0.8397	-0.031		19.4237	8.38861	-0.628803
168400	37.142	0.8406	-0.0309		19.4573	8.3976	-0.626775
168600	37.212	0.8416	-0.0309		19.4939	8.40759	-0.626775
168800	37.276	0.8425	-0.0308		19.5275	8.41658	-0.624746
169000	37.338	0.8435	-0.0306		19.5599	8.42657	-0.62069
169200	37.404	0.8445	-0.0306		19.5945	8.43656	-0.62069
169400	37.464	0.8455	-0.0307		19.6259	8.44655	-0.622718
169600	37.526	0.8464	-0.0306		19.6584	8.45554	-0.62069
169800	37.592	0.8474	-0.0306		19.693	8.46553	-0.62069
170000	37.652	0.8483	-0.0306		19.7244	8.47453	-0.62069
170200	37.716	0.8494	-0.0305		19.758	8.48551	-0.618661
170400	37.78	0.8504	-0.0305		19.7915	8.4955	-0.618661
170600	37.842	0.8513	-0.0304		19.824	8.5045	-0.616633
170800	37.908	0.8524	-0.0305		19.8585	8.51548	-0.618661
171000	37.976	0.8532	-0.0304		19.8942	8.52348	-0.616633
171200	38.046	0.8542	-0.0304		19.9308	8.53347	-0.616633
171400	38.112	0.8554	-0.0304		19.9654	8.54545	-0.616633
171600	38.182	0.8563	-0.0303		20.0021	8.55445	-0.614604
171800	38.262	0.8575	-0.0304		20.044	8.56643	-0.616633
172000	38.346	0.8584	-0.0304		20.088	8.57542	-0.616633
172200	38.428	0.8596	-0.0304		20.1309	8.58741	-0.616633
172400	38.504	0.8608	-0.0303		20.1708	8.5994	-0.614604
172600	38.578	0.8618	-0.0303		20.2095	8.60939	-0.614604
172800	38.648	0.8629	-0.0302		20.2462	8.62038	-0.612576
173000	38.71	0.8638	-0.03		20.2787	8.62937	-0.608519
173200	38.77	0.8646	-0.03		20.3101	8.63736	-0.608519
173400	38.836	0.8657	-0.0299		20.3447	8.64835	-0.606491
173600	38.9	0.8667	-0.03		20.3782	8.65834	-0.608519
173800	38.964	0.8676	-0.0299		20.4117	8.66733	-0.606491
174000	39.024	0.8686	-0.0299		20.4432	8.67732	-0.606491
174200	39.088	0.8695	-0.03		20.4767	8.68631	-0.608519
174400	39.148	0.8704	-0.0299		20.5081	8.6953	-0.606491
174600	39.212	0.8716	-0.0298		20.5416	8.70729	-0.604462
174800	39.278	0.8725	-0.0296		20.5762	8.71628	-0.600406
175000	39.342	0.8735	-0.0299		20.6097	8.72627	-0.606491
175200	39.402	0.8744	-0.0298		20.6412	8.73526	-0.604462
175400	39.468	0.8753	-0.0298		20.6758	8.74426	-0.604462
175600	39.532	0.8763	-0.0297		20.7093	8.75425	-0.602434
175800	39.598	0.8773	-0.0297		20.7439	8.76424	-0.602434
176000	39.674	0.8784	-0.0297		20.7837	8.77522	-0.602434
176200	39.752	0.8796	-0.0297		20.8245	8.78721	-0.602434
176400	39.824	0.8805	-0.0295		20.8623	8.7962	-0.598377
176600	39.898	0.8816	-0.0295		20.901	8.80719	-0.598377
176800	39.964	0.8827	-0.0293		20.9356	8.81818	-0.59432
177000	40.032	0.8836	-0.0293		20.9712	8.82717	-0.59432
177200	40.098	0.8846	-0.0295		21.0058	8.83716	-0.598377
177400	40.164	0.8856	-0.0294		21.0404	8.84715	-0.596349
177600	40.228	0.8865	-0.0294		21.0739	8.85614	-0.596349
177800	40.292	0.8875	-0.0293		21.1074	8.86613	-0.59432
178000	40.354	0.8886	-0.0293		21.1399	8.87712	-0.59432
178200	40.414	0.8895	-0.0292		21.1713	8.88611	-0.592292
178400	40.48	0.8906	-0.0293		21.2059	8.8971	-0.59432
178600	40.544	0.8915	-0.0292		21.2394	8.90609	-0.592292
178800	40.606	0.8924	-0.0292		21.2719	8.91508	-0.592292
179000	40.668	0.8933	-0.0291		21.3044	8.92408	-0.590264
179200	40.738	0.8943	-0.0292		21.3411	8.93407	-0.592292
179400	40.81	0.8953	-0.0289		21.3788	8.94406	-0.586207
179600	40.882	0.8965	-0.0288		21.4165	8.95604	-0.584178
179800	40.96	0.8975	-0.0289		21.4574	8.96603	-0.586207
180000	41.03	0.8986	-0.0289		21.494	8.97702	-0.586207
180200	41.1	0.8997	-0.0288		21.5307	8.98801	-0.584178
180400	41.168	0.9007	-0.0289		21.5663	8.998	-0.586207
180600	41.234	0.9018	-0.0288		21.6009	9.00899	-0.584178
180800	41.3	0.9026	-0.0288		21.6355	9.01698	-0.584178
181000	41.362	0.9036	-0.0288		21.6679	9.02697	-0.584178
181200	41.426	0.9045	-0.0287		21.7015	9.03596	-0.58215
181400	41.492	0.9055	-0.0287		21.7361	9.04595	-0.58215
181600	41.558	0.9066	-0.0286		21.7706	9.05694	-0.580122
181800	41.616	0.9077	-0.0286		21.801	9.06793	-0.580122
182000	41.68	0.9085	-0.0286		21.8345	9.07592	-0.580122
182200	41.742	0.9095	-0.0284		21.867	9.08591	-0.576065
182400	41.8	0.9105	-0.0284		21.8974	9.0959	-0.576065
182600	41.856	0.9114	-0.0284		21.9267	9.1049	-0.576065
182800	41.918	0.9124	-0.0284		21.9592	9.11489	-0.576065
183000	41.998	0.9134	-0.0286		22.0011	9.12488	-0.580122
183200	42.074	0.9145	-0.0286		22.0409	9.13586	-0.580122
183400	42.144	0.9156	-0.0287		22.0776	9.14685	-0.58215
183600	42.212	0.9166	-0.0287		22.1132	9.15684	-0.58215
183800	42.28	0.9176	-0.0288		22.1489	9.16683	-0.584178
184000	42.338	0.9186	-0.0289		22.1792	9.17682	-0.586207
184200	42.402	0.9197	-0.0288		22.2128	9.18781	-0.584178
184400	42.466	0.9206	-0.0287		22.2463	9.1968	-0.58215
184600	42.528	0.9216	-0.0286		22.2788	9.20679	-0.580122
184800	42.592	0.9225	-0.0286		22.3123	9.21578	-0.580122
185000	42.654	0.9236	-0.0286		22.3448	9.22677	-0.580122
185200	42.718	0.9244	-0.0285		22.3783	9.23477	-0.578093
185400	42.778	0.9255	-0.0285		22.4097	9.24575	-0.578093
185600	42.838	0.9265	-0.0286		22.4412	9.25574	-0.580122
185800	42.898	0.9274	-0.0285		22.4726	9.26474	-0.578093
186000	42.964	0.9283	-0.0284		22.5072	9.27373	-0.576065
186200	43.024	0.9293	-0.0284		22.5386	9.28372	-0.576065
186400	43.086	0.9302	-0.0283		22.5711	9.29271	-0.574037
186600	43.15	0.9312	-0.0283		22.6046	9.3027	-0.574037
186800	43.214	0.9321	-0.0283		22.6381	9.31169	-0.574037
187000	43.276	0.933	-0.0283		22.6706	9.32068	-0.574037
187200	43.336	0.9341	-0.0282		22.7021	9.33167	-0.572008
187400	43.4	0.9351	-0.0281		22.7356	9.34166	-0.56998
187600	43.466	0.936	-0.0281		22.7702	9.35065	-0.56998
187800	43.53	0.9371	-0.0281		22.8037	9.36164	-0.56998
188000	43.596	0.9381	-0.0281		22.8383	9.37163	-0.56998
188200	43.66	0.9391	-0.028		22.8718	9.38162	-0.567951
188400	43.732	0.9401	-0.0279		22.9095	9.39161	-0.565923
188600	43.802	0.9409	-0.0279		22.9462	9.3996	-0.565923
188800	43.866	0.942	-0.028		22.9797	9.41059	-0.567951
189000	43.932	0.943	-0.0279		23.0143	9.42058	-0.565923
189200	43.996	0.944	-0.0279		23.0478	9.43057	-0.565923
189400	44.06	0.9451	-0.0278		23.0813	9.44156	-0.563895
189600	44.128	0.946	-0.0277		23.1169	9.45055	-0.561866
189800	44.204	0.9471	-0.0277		23.1568	9.46154	-0.561866
190000	44.266	0.9481	-0.0277		23.1892	9.47153	-0.561866
190200	44.334	0.9493	-0.027		23.2249	9.48352	-0.547667
190400	44.402	0.9502	-0.0269		23.2605	9.49251	-0.545639
190600	44.468	0.9511	-0.0269		23.2951	9.5015	-0.545639
190800	44.532	0.9522	-0.0269		23.3286	9.51249	-0.545639
191000	44.596	0.9531	-0.0269		23.3621	9.52148	-0.545639
191200	44.658	0.9542	-0.0269		23.3946	9.53247	-0.545639
191400	44.726	0.9551	-0.0267		23.4302	9.54146	-0.541582
191600	44.79	0.9562	-0.0267		23.4637	9.55245	-0.541582
191800	44.85	0.9571	-0.0268		23.4952	9.56144	-0.543611
192000	44.91	0.9581	-0.0267		23.5266	9.57143	-0.541582
192200	44.97	0.9591	-0.0267		23.558	9.58142	-0.541582
192400	45.032	0.9599	-0.0267		23.5905	9.58941	-0.541582
192600	45.096	0.961	-0.0266		23.624	9.6004	-0.539554
192800	45.162	0.9619	-0.0267		23.6586	9.60939	-0.541582
193000	45.234	0.963	-0.0266		23.6963	9.62038	-0.539554
193200	45.312	0.9641	-0.0266		23.7372	9.63137	-0.539554
193400	45.386	0.9652	-0.0265		23.776	9.64236	-0.537525
193600	45.456	0.9663	-0.0264		23.8126	9.65335	-0.535497
193800	45.526	0.9673	-0.0263		23.8493	9.66334	-0.533469
194000	45.59	0.9682	-0.0263		23.8828	9.67233	-0.533469
194200	45.654	0.9692	-0.0263		23.9164	9.68232	-0.533469
194400	45.724	0.9703	-0.0263		23.953	9.69331	-0.533469
194600	45.79	0.9713	-0.0263		23.9876	9.7033	-0.533469
194800	45.848	0.9723	-0.0262		24.018	9.71329	-0.53144
195000	45.912	0.9733	-0.0263		24.0515	9.72328	-0.533469
195200	45.97	0.9744	-0.0261		24.0819	9.73427	-0.529412
195400	46.03	0.9752	-0.0261		24.1133	9.74226	-0.529412
195600	46.09	0.9763	-0.026		24.1448	9.75325	-0.527383
195800	46.15	0.9772	-0.0261		24.1762	9.76224	-0.529412
196000	46.21	0.9782	-0.026		24.2076	9.77223	-0.527383
196200	46.27	0.9792	-0.026		24.2391	9.78222	-0.527383
196400	46.332	0.98	-0.0258		24.2715	9.79021	-0.523327
196600	46.394	0.9811	-0.0258		24.304	9.8012	-0.523327
196800	46.452	0.982	-0.0258		24.3344	9.81019	-0.523327
197000	46.512	0.983	-0.0258		24.3658	9.82018	-0.523327
197200	46.57	0.984	-0.0258		24.3962	9.83017	-0.523327
197400	46.63	0.9849	-0.0257		24.4277	9.83916	-0.521298
197600	46.692	0.986	-0.0257		24.4601	9.85015	-0.521298
197800	46.756	0.987	-0.0256		24.4937	9.86014	-0.51927
198000	46.826	0.9881	-0.0256		24.5303	9.87113	-0.51927
198200	46.884	0.9889	-0.0256		24.5607	9.87912	-0.51927
198400	46.954	0.9899	-0.0255		24.5974	9.88911	-0.517241
198600	47.034	0.9912	-0.0255		24.6393	9.9021	-0.517241
198800	47.118	0.9922	-0.0255		24.6833	9.91209	-0.517241
199000	47.194	0.9932	-0.0254		24.7231	9.92208	-0.515213
199200	47.264	0.9944	-0.0254		24.7598	9.93407	-0.515213
199400	47.336	0.9955	-0.0253		24.7975	9.94505	-0.513185
199600	47.4	0.9966	-0.0252		24.831	9.95604	-0.511156
199800	47.462	0.9975	-0.0252		24.8635	9.96503	-0.511156
200000	47.526	0.9984	-0.0253		24.897	9.97403	-0.513185
200200	47.59	0.9995	-0.0252		24.9306	9.98501	-0.511156
200400	47.652	1.0004	-0.0251		24.963	9.99401	-0.509128
200600	47.716	1.0015	-0.0251		24.9966	10.005	-0.509128
200800	47.776	1.0025	-0.025		25.028	10.015	-0.507099
201000	47.836	1.0035	-0.025		25.0594	10.025	-0.507099
201200	47.892	1.0044	-0.025		25.0888	10.034	-0.507099
201400	47.948	1.0053	-0.0247		25.1181	10.043	-0.501014
201600	48.01	1.0064	-0.0247		25.1506	10.0539	-0.501014
201800	48.068	1.0072	-0.0247		25.181	10.0619	-0.501014
202000	48.126	1.0081	-0.0247		25.2113	10.0709	-0.501014
202200	48.186	1.0093	-0.0246		25.2428	10.0829	-0.498986
202400	48.246	1.0102	-0.0247		25.2742	10.0919	-0.501014
202600	48.306	1.0111	-0.0245		25.3056	10.1009	-0.496957
202800	48.368	1.0122	-0.0246		25.3381	10.1119	-0.498986
203000	48.424	1.0132	-0.0245		25.3675	10.1219	-0.496957
203200	48.482	1.0141	-0.0245		25.3978	10.1309	-0.496957
203400	48.542	1.0151	-0.0245		25.4293	10.1409	-0.496957
203600	48.604	1.0161	-0.0245		25.4618	10.1508	-0.496957
203800	48.666	1.0171	-0.0244		25.4942	10.1608	-0.494929
204000	48.732	1.018	-0.0244		25.5288	10.1698	-0.494929
204200	48.796	1.019	-0.0244		25.5623	10.1798	-0.494929
204400	48.88	1.0201	-0.0243		25.6063	10.1908	-0.492901
204600	48.962	1.0213	-0.0243		25.6493	10.2028	-0.492901
204800	49.04	1.0224	-0.0243		25.6902	10.2138	-0.492901
205000	49.11	1.0236	-0.0243		25.7268	10.2258	-0.492901
205200	49.174	1.0247	-0.0243		25.7604	10.2368	-0.492901
205400	49.242	1.0257	-0.0245		25.796	10.2468	-0.496957
205600	49.302	1.0267	-0.0245		25.8274	10.2567	-0.496957
205800	49.356	1.0277	-0.0242		25.8557	10.2667	-0.490872
206000	49.412	1.0285	-0.024		25.885	10.2747	-0.486815
206200	49.468	1.0295	-0.0238		25.9144	10.2847	-0.482759
206400	49.524	1.0304	-0.0239		25.9437	10.2937	-0.484787
206600	49.582	1.0314	-0.0237		25.9741	10.3037	-0.48073
206800	49.642	1.0324	-0.0239		26.0055	10.3137	-0.484787
207000	49.7	1.0333	-0.0238		26.0359	10.3227	-0.482759
207200	49.756	1.0343	-0.0238		26.0652	10.3327	-0.482759
207400	49.816	1.0353	-0.0237		26.0967	10.3427	-0.48073
207600	49.876	1.0363	-0.0236		26.1281	10.3526	-0.478702
207800	49.936	1.0373	-0.0236		26.1595	10.3626	-0.478702
208000	49.996	1.0381	-0.0235		26.191	10.3706	-0.476673
208200	50.062	1.0391	-0.0235		26.2255	10.3806	-0.476673
208400	50.124	1.0402	-0.0234		26.258	10.3916	-0.474645
208600	50.188	1.0411	-0.0233		26.2915	10.4006	-0.472617
208800	50.248	1.0422	-0.0233		26.323	10.4116	-0.472617
209000	50.308	1.0432	-0.0233		26.3544	10.4216	-0.472617
209200	50.366	1.0441	-0.023		26.3848	10.4306	-0.466531
209400	50.43	1.0452	-0.0232		26.4183	10.4416	-0.470588
209600	50.484	1.0461	-0.0229		26.4466	10.4505	-0.464503
209800	50.544	1.0471	-0.0229		26.478	10.4605	-0.464503
210000	50.598	1.0481	-0.023		26.5063	10.4705	-0.466531
210200	50.658	1.049	-0.023		26.5378	10.4795	-0.466531
210400	50.718	1.05	-0.023		26.5692	10.4895	-0.466531
210600	50.772	1.051	-0.0229		26.5975	10.4995	-0.464503
210800	50.83	1.052	-0.0228		26.6279	10.5095	-0.462475
211000	50.888	1.053	-0.0228		26.6583	10.5195	-0.462475
211200	50.952	1.054	-0.0227		26.6918	10.5295	-0.460446
211400	51.02	1.055	-0.0227		26.7274	10.5395	-0.460446
211600	51.086	1.0561	-0.0227		26.762	10.5504	-0.460446
211800	51.15	1.057	-0.0227		26.7955	10.5594	-0.460446
212000	51.208	1.0581	-0.0227		26.8259	10.5704	-0.460446
212200	51.27	1.0589	-0.0226		26.8584	10.5784	-0.458418
212400	51.336	1.06	-0.0226		26.8929	10.5894	-0.458418
212600	51.406	1.061	-0.0225		26.9296	10.5994	-0.456389
212800	51.472	1.0622	-0.0226		26.9642	10.6114	-0.458418
213000	51.536	1.0632	-0.0225		26.9977	10.6214	-0.456389
213200	51.596	1.0642	-0.0225		27.0291	10.6314	-0.456389
213400	51.654	1.0652	-0.0225		27.0595	10.6414	-0.456389
213600	51.716	1.0662	-0.0224		27.092	10.6513	-0.454361
213800	51.778	1.0672	-0.0221		27.1245	10.6613	-0.448276
214000	51.832	1.0682	-0.0223		27.1528	10.6713	-0.452333
214200	51.892	1.0692	-0.0222		27.1842	10.6813	-0.450304
214400	51.952	1.07	-0.0221		27.2156	10.6893	-0.448276
214600	52.01	1.0712	-0.0222		27.246	10.7013	-0.450304
214800	52.068	1.0721	-0.0222		27.2764	10.7103	-0.450304
215000	52.124	1.073	-0.0221		27.3057	10.7193	-0.448276
215200	52.19	1.0741	-0.0221		27.3403	10.7303	-0.448276
215400	52.254	1.0753	-0.022		27.3738	10.7423	-0.446247
215600	52.316	1.0761	-0.0219		27.4063	10.7502	-0.444219
215800	52.376	1.0772	-0.0219		27.4378	10.7612	-0.444219
216000	52.432	1.0781	-0.0218		27.4671	10.7702	-0.442191
216200	52.492	1.0792	-0.0217		27.4985	10.7812	-0.440162
216400	52.546	1.08	-0.0217		27.5268	10.7892	-0.440162
216600	52.602	1.0811	-0.0218		27.5561	10.8002	-0.442191
216800	52.66	1.0821	-0.0217		27.5865	10.8102	-0.440162
217000	52.716	1.0832	-0.0218		27.6159	10.8212	-0.442191
217200	52.772	1.0839	-0.0217		27.6452	10.8282	-0.440162
217400	52.83	1.0851	-0.0217		27.6756	10.8402	-0.440162
217600	52.884	1.086	-0.0217		27.7039	10.8492	-0.440162
217800	52.94	1.0869	-0.0215		27.7332	10.8581	-0.436105
218000	53	1.088	-0.0215		27.7646	10.8691	-0.436105
218200	53.066	1.0891	-0.0215		27.7992	10.8801	-0.436105
218400	53.126	1.09	-0.0216		27.8307	10.8891	-0.438134
218600	53.192	1.0911	-0.0214		27.8652	10.9001	-0.434077
218800	53.254	1.0921	-0.0214		27.8977	10.9101	-0.434077
219000	53.312	1.0931	-0.0213		27.9281	10.9201	-0.432049
219200	53.368	1.0941	-0.0212		27.9574	10.9301	-0.43002
219400	53.428	1.0951	-0.0212		27.9889	10.9401	-0.43002
219600	53.48	1.0961	-0.0211		28.0161	10.95	-0.427992
219800	53.54	1.097	-0.0209		28.0475	10.959	-0.423935
220000	53.594	1.0981	-0.0208		28.0758	10.97	-0.421907
220200	53.648	1.099	-0.0208		28.1041	10.979	-0.421907
220400	53.706	1.1	-0.0207		28.1345	10.989	-0.419878
220600	53.762	1.1009	-0.0206		28.1638	10.998	-0.41785
220800	53.818	1.102	-0.0205		28.1932	11.009	-0.415822
221000	53.878	1.1029	-0.0204		28.2246	11.018	-0.413793
221200	53.936	1.1039	-0.0202		28.255	11.028	-0.409736
221400	53.996	1.105	-0.0199		28.2864	11.039	-0.403651
221600	54.06	1.1059	-0.0199		28.3199	11.048	-0.403651
221800	54.12	1.1069	-0.0199		28.3514	11.0579	-0.403651
222000	54.182	1.108	-0.0198		28.3839	11.0689	-0.401623
222200	54.26	1.1092	-0.0198		28.4247	11.0809	-0.401623
222400	54.334	1.1102	-0.0195		28.4635	11.0909	-0.395538
222600	54.404	1.1114	-0.0194		28.5001	11.1029	-0.393509
222800	54.468	1.1124	-0.0193		28.5337	11.1129	-0.391481
223000	54.532	1.1136	-0.0192		28.5672	11.1249	-0.389452
223200	54.588	1.1148	-0.0192		28.5965	11.1369	-0.389452
223400	54.642	1.1156	-0.0188		28.6248	11.1449	-0.381339
223600	54.696	1.1166	-0.0189		28.6531	11.1548	-0.383367
223800	54.744	1.1175	-0.0189		28.6783	11.1638	-0.383367
224000	54.794	1.1185	-0.0187		28.7045	11.1738	-0.37931
224200	54.846	1.1196	-0.0186		28.7317	11.1848	-0.377282
224400	54.896	1.1204	-0.0184		28.7579	11.1928	-0.373225
224600	54.95	1.1213	-0.0183		28.7862	11.2018	-0.371197
224800	55	1.1222	-0.0183		28.8124	11.2108	-0.371197
225000	55.056	1.1231	-0.0183		28.8417	11.2198	-0.371197
225200	55.11	1.124	-0.0181		28.87	11.2288	-0.36714
225400	55.164	1.1251	-0.018		28.8983	11.2398	-0.365112
225600	55.218	1.1261	-0.0179		28.9266	11.2498	-0.363083
225800	55.272	1.1272	-0.0178		28.9549	11.2607	-0.361055
226000	55.326	1.1281	-0.0177		28.9831	11.2697	-0.359026
226200	55.378	1.1291	-0.0175		29.0104	11.2797	-0.35497
226400	55.432	1.13	-0.0174		29.0387	11.2887	-0.352941
226600	55.49	1.1312	-0.0173		29.0691	11.3007	-0.350913
226800	55.55	1.132	-0.0172		29.1005	11.3087	-0.348884
227000	55.604	1.1331	-0.017		29.1288	11.3197	-0.344828
227200	55.66	1.134	-0.0169		29.1581	11.3287	-0.342799
227400	55.72	1.1349	-0.0168		29.1895	11.3377	-0.340771
227600	55.78	1.1359	-0.0167		29.221	11.3477	-0.338742
227800	55.84	1.1369	-0.0166		29.2524	11.3576	-0.336714
228000	55.896	1.138	-0.0165		29.2817	11.3686	-0.334686
228200	55.956	1.1391	-0.0164		29.3132	11.3796	-0.332657
228400	56.012	1.1402	-0.0163		29.3425	11.3906	-0.330629
228600	56.07	1.141	-0.0161		29.3729	11.3986	-0.326572
228800	56.126	1.1421	-0.016		29.4022	11.4096	-0.324544
229000	56.18	1.143	-0.0159		29.4305	11.4186	-0.322515
229200	56.236	1.144	-0.0159		29.4599	11.4286	-0.322515
229400	56.294	1.1449	-0.0157		29.4902	11.4376	-0.318458
229600	56.35	1.1459	-0.0155		29.5196	11.4476	-0.314402
229800	56.408	1.1468	-0.0154		29.55	11.4565	-0.312373
230000	56.462	1.1479	-0.0153		29.5783	11.4675	-0.310345
230200	56.514	1.1489	-0.0152		29.6055	11.4775	-0.308316
230400	56.572	1.1499	-0.0152		29.6359	11.4875	-0.308316
230600	56.628	1.151	-0.0151		29.6652	11.4985	-0.306288
230800	56.68	1.1519	-0.0149		29.6925	11.5075	-0.302231
231000	56.738	1.1529	-0.0148		29.7228	11.5175	-0.300203
231200	56.792	1.1539	-0.0148		29.7511	11.5275	-0.300203
231400	56.846	1.1549	-0.0145		29.7794	11.5375	-0.294118
231600	56.898	1.1558	-0.0145		29.8067	11.5465	-0.294118
231800	56.956	1.1568	-0.0143		29.837	11.5564	-0.290061
232000	56.99	1.1578	-0.0142		29.8549	11.5664	-0.288032
232200	57.01	1.159	-0.0123		29.8653	11.5784	-0.249493
232400	57.056	1.1599	-0.0122		29.8894	11.5874	-0.247465
232600	57.108	1.161	-0.0121		29.9167	11.5984	-0.245436
232800	57.158	1.162	-0.012		29.9429	11.6084	-0.243408
233000	57.212	1.1628	-0.012		29.9712	11.6164	-0.243408
233200	57.26	1.1639	-0.0119		29.9963	11.6274	-0.241379
233400	57.314	1.165	-0.0118		30.0246	11.6384	-0.239351
233600	57.368	1.166	-0.0117		30.0529	11.6484	-0.237323
233800	57.422	1.1669	-0.0117		30.0812	11.6573	-0.237323
234000	57.47	1.168	-0.0116		30.1063	11.6683	-0.235294
234200	57.52	1.1689	-0.0115		30.1325	11.6773	-0.233266
234400	57.574	1.1698	-0.0114		30.1608	11.6863	-0.231237
234600	57.634	1.1707	-0.0112		30.1922	11.6953	-0.227181
234800	57.69	1.1719	-0.0112		30.2216	11.7073	-0.227181
235000	57.752	1.173	-0.0111		30.254	11.7183	-0.225152
235200	57.81	1.174	-0.011		30.2844	11.7283	-0.223124
235400	57.866	1.1749	-0.0109		30.3138	11.7373	-0.221095
235600	57.922	1.1759	-0.0109		30.3431	11.7473	-0.221095
235800	57.976	1.1769	-0.0108		30.3714	11.7572	-0.219067
236000	58.032	1.1779	-0.0107		30.4007	11.7672	-0.217039
236200	58.082	1.179	-0.0107		30.4269	11.7782	-0.217039
236400	58.136	1.18	-0.0106		30.4552	11.7882	-0.21501
236600	58.188	1.1808	-0.0105		30.4824	11.7962	-0.212982
236800	58.242	1.182	-0.0104		30.5107	11.8082	-0.210953
237000	58.294	1.1829	-0.0104		30.538	11.8172	-0.210953
237200	58.342	1.1839	-0.0104		30.5631	11.8272	-0.210953
237400	58.39	1.1848	-0.0103		30.5883	11.8362	-0.208925
237600	58.442	1.1858	-0.0102		30.6155	11.8462	-0.206897
237800	58.492	1.1868	-0.0101		30.6417	11.8561	-0.204868
238000	58.544	1.1877	-0.0101		30.6689	11.8651	-0.204868
238200	58.594	1.1887	-0.0101		30.6951	11.8751	-0.204868
238400	58.652	1.1897	-0.0099		30.7255	11.8851	-0.200811
238600	58.702	1.1906	-0.01		30.7517	11.8941	-0.20284
238800	58.76	1.1917	-0.0099		30.7821	11.9051	-0.200811
239000	58.824	1.1928	-0.0099		30.8156	11.9161	-0.200811
239200	58.894	1.1939	-0.0098		30.8523	11.9271	-0.198783
239400	58.938	1.195	-0.0097		30.8753	11.9381	-0.196755
239600	58.968	1.196	-0.0096		30.8911	11.9481	-0.194726
239800	59.014	1.1972	-0.0096		30.9151	11.96	-0.194726
240000	59.062	1.1982	-0.0096		30.9403	11.97	-0.194726
240200	59.108	1.1992	-0.0096		30.9644	11.98	-0.194726
240400	59.154	1.2002	-0.0095		30.9885	11.99	-0.192698
240600	59.202	1.2012	-0.0095		31.0136	12	-0.192698
240800	59.25	1.2022	-0.0093		31.0388	12.01	-0.188641
241000	59.296	1.2031	-0.0091		31.0629	12.019	-0.184584
241200	59.342	1.2042	-0.0091		31.087	12.03	-0.184584
241400	59.386	1.205	-0.009		31.11	12.038	-0.182556
241600	59.422	1.206	-0.0088		31.1289	12.048	-0.178499
241800	59.466	1.207	-0.0087		31.1519	12.0579	-0.176471
242000	59.478	1.2083	-0.0084		31.1582	12.0709	-0.170385
242200	59.494	1.2097	-0.0081		31.1666	12.0849	-0.1643
242400	59.518	1.2105	-0.0079		31.1792	12.0929	-0.160243
242600	59.544	1.2114	-0.0078		31.1928	12.1019	-0.158215
242800	59.568	1.2125	-0.0076		31.2054	12.1129	-0.154158
243000	59.594	1.2134	-0.0076		31.219	12.1219	-0.154158
243200	59.624	1.2143	-0.0074		31.2347	12.1309	-0.150101
243400	59.66	1.2154	-0.0072		31.2536	12.1419	-0.146045
243600	59.69	1.2163	-0.0072		31.2693	12.1508	-0.146045
243800	59.73	1.2172	-0.007		31.2902	12.1598	-0.141988
244000	59.764	1.2181	-0.0069		31.308	12.1688	-0.139959
244200	59.804	1.2191	-0.0069		31.329	12.1788	-0.139959
244400	59.844	1.2201	-0.0066		31.35	12.1888	-0.133874
244600	59.888	1.2209	-0.0066		31.373	12.1968	-0.133874
244800	59.934	1.2219	-0.0065		31.3971	12.2068	-0.131846
245000	59.982	1.2229	-0.0063		31.4222	12.2168	-0.127789
245200	60.032	1.2238	-0.0062		31.4484	12.2258	-0.125761
245400	60.076	1.2249	-0.0062		31.4715	12.2368	-0.125761
245600	60.118	1.2258	-0.006		31.4935	12.2458	-0.121704
245800	60.166	1.2269	-0.0058		31.5186	12.2567	-0.117647
246000	60.21	1.2278	-0.0057		31.5417	12.2657	-0.115619
246200	60.256	1.2288	-0.0055		31.5658	12.2757	-0.111562
246400	60.306	1.2299	-0.0053		31.592	12.2867	-0.107505
246600	60.356	1.2309	-0.0052		31.6182	12.2967	-0.105477
246800	60.404	1.232	-0.005		31.6433	12.3077	-0.10142
247000	60.45	1.233	-0.0048		31.6674	12.3177	-0.0973631
247200	60.494	1.234	-0.0048		31.6905	12.3277	-0.0973631
247400	60.54	1.235	-0.0045		31.7146	12.3377	-0.0912779
247600	60.594	1.236	-0.0044		31.7428	12.3477	-0.0892495
247800	60.638	1.237	-0.0043		31.7659	12.3576	-0.0872211
248000	60.688	1.2381	-0.0041		31.7921	12.3686	-0.0831643
248200	60.736	1.2389	-0.0041		31.8172	12.3766	-0.0831643
248400	60.782	1.2399	-0.004		31.8413	12.3866	-0.0811359
248600	60.824	1.2409	-0.0037		31.8633	12.3966	-0.0750507
248800	60.876	1.2419	-0.0035		31.8906	12.4066	-0.0709939
249000	60.92	1.2429	-0.0033		31.9136	12.4166	-0.0669371
249200	60.97	1.244	-0.0031		31.9398	12.4276	-0.0628803
249400	61.018	1.245	-0.003		31.965	12.4376	-0.0608519
249600	61.064	1.2461	-0.0028		31.9891	12.4486	-0.0567951
249800	61.108	1.2469	-0.0027		32.0121	12.4565	-0.0547667
250000	61.152	1.2481	-0.0025		32.0352	12.4685	-0.0507099
250200	61.2	1.249	-0.0024		32.0603	12.4775	-0.0486815
250400	61.24	1.2501	-0.0022		32.0813	12.4885	-0.0446247
250600	61.28	1.2511	-0.0021		32.1022	12.4985	-0.0425963
250800	61.326	1.252	-0.0021		32.1263	12.5075	-0.0425963
251000	61.366	1.253	-0.0019		32.1473	12.5175	-0.0385396
251200	61.408	1.254	-0.0019		32.1693	12.5275	-0.0385396
251400	61.452	1.2549	-0.0017		32.1923	12.5365	-0.0344828
251600	61.496	1.2558	-0.0016		32.2154	12.5455	-0.0324544
251800	61.534	1.257	-0.0014		32.2353	12.5574	-0.0283976
252000	61.578	1.2579	-0.0013		32.2583	12.5664	-0.0263692
252200	61.622	1.2588	-0.0012		32.2814	12.5754	-0.0243408
252400	61.664	1.2598	-0.0011		32.3034	12.5854	-0.0223124
252600	61.71	1.2609	-0.0008		32.3275	12.5964	-0.0162272
252800	61.728	1.262	-0.0008		32.3369	12.6074	-0.0162272
253000	61.76	1.2629	-0.0006		32.3537	12.6164	-0.0121704
253200	61.792	1.2638	-0.0004		32.3704	12.6254	-0.00811359
253400	61.828	1.2649	-0.0001		32.3893	12.6364	-0.0020284
253600	61.866	1.2659	0		32.4092	12.6464	0
253800	61.906	1.2668	0.0002		32.4302	12.6553	0.0040568
254000	61.942	1.2678	0.0004		32.449	12.6653	0.00811359
254200	61.986	1.2688	0.0005		32.4721	12.6753	0.010142
254400	62.024	1.2698	0.0007		32.492	12.6853	0.0141988
254600	62.07	1.2708	0.0008		32.5161	12.6953	0.0162272
254800	62.11	1.2718	0.0007		32.537	12.7053	0.0141988
255000	62.15	1.2727	0.0009		32.558	12.7143	0.0182556
255200	62.192	1.2738	0.0011		32.58	12.7253	0.0223124
255400	62.234	1.2746	0.0012		32.602	12.7333	0.0243408
255600	62.276	1.2756	0.0013		32.624	12.7433	0.0263692
255800	62.316	1.2767	0.0014		32.6449	12.7542	0.0283976
256000	62.334	1.2779	0.0014		32.6544	12.7662	0.0283976
256200	62.356	1.279	0.0016		32.6659	12.7772	0.0324544
256400	62.378	1.2801	0.0016		32.6774	12.7882	0.0324544
256600	62.406	1.281	0.0018		32.6921	12.7972	0.0365112
256800	62.432	1.282	0.0018		32.7057	12.8072	0.0365112
257000	62.464	1.2829	0.002		32.7225	12.8162	0.040568
257200	62.498	1.2838	0.002		32.7403	12.8252	0.040568
257400	62.532	1.2847	0.0021		32.7581	12.8342	0.0425963
257600	62.57	1.2857	0.0022		32.778	12.8442	0.0446247
257800	62.628	1.2868	0.0023		32.8084	12.8551	0.0466531
258000	62.684	1.2879	0.0023		32.8377	12.8661	0.0466531
258200	62.576	1.2902	0.0027		32.7811	12.8891	0.0547667
258400	62.47	1.2909	0.0029		32.7256	12.8961	0.0588235
258600	62.37	1.2912	0.0032		32.6732	12.8991	0.0649087
258800	62.282	1.2917	0.0033		32.6271	12.9041	0.0669371
259000	62.212	1.2924	0.0036		32.5905	12.9111	0.0730223
259200	62.234	1.2934	0.0039		32.602	12.9211	0.0791075
259400	62.292	1.2947	0.0041		32.6324	12.9341	0.0831643
259600	62.35	1.296	0.0044		32.6627	12.9471	0.0892495
259800	62.234	1.2969	0.0049		32.602	12.956	0.0993915
260000	62.16	1.2986	0.0055		32.5632	12.973	0.111562
260052	61.118	1.302	0.0071		32.0174	13.007	0.144016
260076	60.05	1.303	0.0077		31.4579	13.017	0.156187
260096	59.042	1.2994	0.0089		30.9298	12.981	0.180527
260200	58.004	1.3019	0.0151		30.386	13.006	0.306288
260248	57.004	1.2967	0.0171		29.8622	12.954	0.346856
260295	55.23	1.3009	0.023		28.9329	12.996	0.466531
260297	54.148	1.3014	0.0239		28.366	13.001	0.484787
260300	52.944	1.3016	0.0284		27.7353	13.003	0.576065
260306	51.834	1.3017	0.0378		27.1538	13.004	0.766734
260314	50.432	1.3031	0.0476		26.4194	13.018	0.965517
260318	49.08	1.3041	0.0509		25.7111	13.028	1.03245
260322	47.202	1.3054	0.0546		24.7273	13.041	1.10751
260324	46.092	1.3063	0.0567		24.1458	13.05	1.1501
260328	44.58	1.3082	0.0618		23.3537	13.0689	1.25355
260332	43.556	1.3096	0.0663		22.8173	13.0829	1.34483
260337	42.286	1.312	0.074		22.152	13.1069	1.50101
260342	41.062	1.3141	0.0849		21.5108	13.1279	1.72211
260350	39.808	1.3133	0.1038		20.8539	13.1199	2.10548
260360	38.6	1.3059	0.1269		20.221	13.046	2.57404
260398	37.594	1.3059	0.1269		19.694	13.046	2.57404
260414	36.076	1.3105	0.1905		18.8988	13.0919	3.8641
260416	34.964	1.3126	0.194		18.3163	13.1129	3.93509
260419	33.39	1.3165	0.2006		17.4917	13.1518	4.06897
260422	32.006	1.3237	0.2133		16.7667	13.2238	4.32657
260426	30.95	1.3309	0.2309		16.2135	13.2957	4.68357
260432	29.692	1.3381	0.265		15.5545	13.3676	5.37525
260438	28.564	1.3379	0.3025		14.9636	13.3656	6.1359
260444	27.418	1.33	0.3353		14.3632	13.2867	6.80122
260452	26.266	1.33	0.3353		13.7597	13.2867	6.80122
260545	25.184	1.33	0.3353		13.1929	13.2867	6.80122
260732	23.668	1.33	0.3353		12.3987	13.2867	6.80122
260736	21.676	1.33	0.3353		11.3552	13.2867	6.80122
260738	19.34	1.33	0.3353		10.1315	13.2867	6.80122
260740	17.208	1.3216	0.4373		9.0146	13.2028	8.87018
260742	15.998	1.3314	0.4397		8.38073	13.3007	8.91886
260746	14.514	1.3314	0.4397		7.60332	13.3007	8.91886
260748	13.076	1.3314	0.4397		6.85001	13.3007	8.91886
260750	11.472	1.3314	0.4397		6.00974	13.3007	8.91886
260753	10.066	1.3314	0.4397		5.27319	13.3007	8.91886
260758	8.852	1.3314	0.4397		4.63722	13.3007	8.91886
260764	7.352	1.3314	0.4397		3.85143	13.3007	8.91886
260770	6.088	1.3314	0.4397		3.18927	13.3007	8.91886
260776	4.738	1.3314	0.4397		2.48205	13.3007	8.91886
260782	3.654	1.3314	0.4397		1.91419	13.3007	8.91886
260793	3.654	1.3314	0.4397		1.91419	13.3007	8.91886
260994	4.386	1.3314	0.4397		2.29766	13.3007	8.91886
261194	4.354	1.3314	0.4397		2.28089	13.3007	8.91886
261394	4.42	1.3314	0.4397		2.31547	13.3007	8.91886
261594	4.5	1.3314	0.4397		2.35738	13.3007	8.91886
261795	4.488	1.3314	0.4397		2.35109	13.3007	8.91886
261996	4.51	1.3314	0.4397		2.36261	13.3007	8.91886
262196	4.61	1.3314	0.4397		2.415	13.3007	8.91886
262396	4.638	1.3314	0.4397		2.42967	13.3007	8.91886
262596	4.626	1.3314	0.4397		2.42338	13.3007	8.91886
262797	4.718	1.3314	0.4397		2.47158	13.3007	8.91886
262998	4.734	1.3314	0.4397		2.47996	13.3007	8.91886
263198	4.774	1.3314	0.4397		2.50091	13.3007	8.91886
263398	4.806	1.3314	0.4397		2.51768	13.3007	8.91886

## Sheet: F-1
Time: 16:51:57,11/29/2019
diameter: 50	mm	height: 100.7	mm
Vertical 100kN force sensor (vertical force of test piece)
Control mode: displacement	Waveform: ramp
mm/s	End point: 0.5921	mm
time (ms)	vertical force (KN)	vertical deformation (mm)	transverse deformation (mm)		stress	axial strain	transverse strain
0	0	0	0		0	0	0
639	0.56	0.0001	0		0.285206	0.000999001	0
1139	0.8	0.0014	-0.0007		0.407437	0.013986	-0.014
1639	0.96	0.0023	-0.0008		0.488924	0.022977	-0.016
2139	1.08	0.0032	-0.001		0.550039	0.031968	-0.02
2639	1.1	0.0045	-0.0011		0.560225	0.044955	-0.022
3139	1.18	0.0054	-0.0009		0.600969	0.0539461	-0.018
3639	1.16	0.0062	-0.0008		0.590783	0.0619381	-0.016
4139	1.2	0.0073	-0.0008		0.611155	0.0729271	-0.016
4639	1.32	0.0084	-0.0006		0.67227	0.0839161	-0.012
5139	1.36	0.0092	-0.0007		0.692642	0.0919081	-0.014
5639	1.5	0.0103	-0.0007		0.763944	0.102897	-0.014
6139	1.4	0.0112	-0.0008		0.713014	0.111888	-0.016
6639	1.56	0.0121	-0.0008		0.794501	0.120879	-0.016
7139	1.66	0.0133	-0.0006		0.845431	0.132867	-0.012
7639	1.58	0.0144	-0.0005		0.804687	0.143856	-0.01
8139	1.7	0.0154	-0.0005		0.865803	0.153846	-0.01
8639	1.86	0.0162	-0.0004		0.94729	0.161838	-0.008
9139	1.8	0.0174	-0.0004		0.916732	0.173826	-0.008
9639	1.92	0.0182	-0.0004		0.977848	0.181818	-0.008
10139	1.98	0.0193	-0.0004		1.00841	0.192807	-0.008
10639	2.06	0.0203	-0.0003		1.04915	0.202797	-0.006
11139	2.04	0.0213	-0.0003		1.03896	0.212787	-0.006
11639	2.08	0.0225	-0.0003		1.05934	0.224775	-0.006
12139	2.14	0.0234	-0.0003		1.08989	0.233766	-0.006
12639	2.22	0.0245	-0.0002		1.13064	0.244755	-0.004
13139	2.24	0.0254	-0.0001		1.14082	0.253746	-0.002
13639	2.38	0.0263	-0.0002		1.21212	0.262737	-0.004
14139	2.44	0.0274	-0.0001		1.24268	0.273726	-0.002
14639	2.54	0.0284	-0.0001		1.29361	0.283716	-0.002
15139	2.5	0.0295	0		1.27324	0.294705	0
15639	2.6	0.0305	0		1.32417	0.304695	0
16139	2.7	0.0315	0.0001		1.3751	0.314685	0.002
16639	2.72	0.0324	0.0002		1.38528	0.323676	0.004
17139	2.8	0.0336	0.0003		1.42603	0.335664	0.006
17639	2.82	0.0345	0.0004		1.43621	0.344655	0.008
18139	2.86	0.0356	0.0005		1.45659	0.355644	0.01
18639	2.98	0.0366	0.0005		1.5177	0.365634	0.01
19139	2.96	0.0375	0.0005		1.50752	0.374625	0.01
19639	3.04	0.0384	0.0004		1.54826	0.383616	0.008
20139	3.24	0.0393	0.0005		1.65012	0.392607	0.01
20639	3.3	0.0403	0.0005		1.68068	0.402597	0.01
21139	3.26	0.0415	0.0007		1.6603	0.414585	0.014
21639	3.38	0.0427	0.0007		1.72142	0.426573	0.014
22139	3.46	0.0435	0.0008		1.76216	0.434565	0.016
22639	3.46	0.0445	0.0008		1.76216	0.444555	0.016
23139	3.64	0.0456	0.001		1.85384	0.455544	0.02
23639	3.7	0.0465	0.0009		1.88439	0.464535	0.018
24139	3.78	0.0474	0.0009		1.92514	0.473526	0.018
24639	3.88	0.0484	0.001		1.97607	0.483516	0.02
25139	3.96	0.0494	0.0011		2.01681	0.493506	0.022
25639	4.1	0.0505	0.0011		2.08811	0.504496	0.022
26139	4.12	0.0515	0.0012		2.0983	0.514486	0.024
26639	4.26	0.0524	0.0013		2.1696	0.523477	0.026
27139	4.42	0.0533	0.0013		2.25109	0.532468	0.026
27639	4.26	0.0545	0.0014		2.1696	0.544456	0.028
28139	4.4	0.0555	0.0014		2.2409	0.554446	0.028
28639	4.56	0.0566	0.0015		2.32239	0.565435	0.03
29139	4.54	0.0575	0.0016		2.3122	0.574426	0.032
29639	4.62	0.0585	0.0017		2.35295	0.584416	0.034
30139	4.88	0.0595	0.0018		2.48536	0.594406	0.036
30639	4.86	0.0605	0.0019		2.47518	0.604396	0.038
31139	5.04	0.0614	0.0018		2.56685	0.613387	0.036
31639	5.02	0.0626	0.002		2.55667	0.625375	0.04
32139	5.18	0.0635	0.002		2.63815	0.634366	0.04
32639	5.18	0.0644	0.002		2.63815	0.643357	0.04
33139	5.34	0.0655	0.0021		2.71964	0.654346	0.042
33639	5.44	0.0665	0.0021		2.77057	0.664336	0.042
34139	5.62	0.0675	0.0023		2.86224	0.674326	0.046
34639	5.68	0.0684	0.0023		2.8928	0.683317	0.046
35139	5.72	0.0696	0.0024		2.91317	0.695305	0.048
35639	5.86	0.0706	0.0024		2.98447	0.705295	0.048
36139	5.88	0.0716	0.0026		2.99466	0.715285	0.052
36639	6.06	0.0726	0.0027		3.08633	0.725275	0.054
37139	6.2	0.0735	0.0026		3.15763	0.734266	0.052
37639	6.24	0.0745	0.0027		3.17801	0.744256	0.054
38139	6.26	0.0754	0.0028		3.18819	0.753247	0.056
38639	6.34	0.0764	0.0028		3.22894	0.763237	0.056
39139	6.6	0.0773	0.0029		3.36135	0.772228	0.058
39639	6.68	0.0784	0.003		3.4021	0.783217	0.06
40139	6.8	0.0794	0.0031		3.46321	0.793207	0.062
40639	6.84	0.0805	0.0033		3.48358	0.804196	0.066
41139	6.96	0.0814	0.0032		3.5447	0.813187	0.064
41639	7.1	0.0825	0.0033		3.616	0.824176	0.066
42139	7.2	0.0835	0.0035		3.66693	0.834166	0.07
42639	7.36	0.0844	0.0035		3.74842	0.843157	0.07
43139	7.36	0.0856	0.0036		3.74842	0.855145	0.072
43639	7.4	0.0867	0.0037		3.76879	0.866134	0.074
44139	7.54	0.0875	0.0038		3.84009	0.874126	0.076
44639	7.76	0.0885	0.0039		3.95214	0.884116	0.078
45139	7.8	0.0896	0.004		3.97251	0.895105	0.08
45639	7.92	0.0904	0.0042		4.03362	0.903097	0.084
46139	7.98	0.0915	0.0043		4.06418	0.914086	0.086
46639	8.14	0.0924	0.0044		4.14567	0.923077	0.088
47139	8.22	0.0934	0.0045		4.18641	0.933067	0.09
47639	8.34	0.0945	0.0047		4.24753	0.944056	0.094
48139	8.52	0.0955	0.0048		4.3392	0.954046	0.096
48639	8.58	0.0965	0.0049		4.36976	0.964036	0.098
49139	8.74	0.0975	0.005		4.45125	0.974026	0.1
49639	8.92	0.0985	0.005		4.54292	0.984016	0.1
50139	9	0.0996	0.0051		4.58366	0.995005	0.102
50639	9.12	0.1006	0.0052		4.64478	1.005	0.104
51139	9.32	0.1016	0.0053		4.74664	1.01499	0.106
51639	9.34	0.1025	0.0053		4.75682	1.02398	0.106
52139	9.5	0.1034	0.0054		4.83831	1.03297	0.108
52639	9.56	0.1044	0.0055		4.86887	1.04296	0.11
53139	9.72	0.1054	0.0055		4.95036	1.05295	0.11
53639	9.78	0.1065	0.0054		4.98091	1.06394	0.108
54139	10.06	0.1073	0.0053		5.12352	1.07193	0.106
54639	10.14	0.1083	0.0055		5.16426	1.08192	0.11
55139	10.18	0.1094	0.0055		5.18463	1.09291	0.11
55639	10.42	0.1105	0.0056		5.30686	1.1039	0.112
56139	10.5	0.1113	0.0057		5.34761	1.11189	0.114
56639	10.62	0.1125	0.0057		5.40872	1.12388	0.114
57139	10.8	0.1134	0.0057		5.50039	1.13287	0.114
57639	11.04	0.1143	0.0058		5.62263	1.14186	0.116
58139	11.12	0.1153	0.0058		5.66337	1.15185	0.116
58639	11.2	0.1163	0.006		5.70411	1.16184	0.12
59139	11.34	0.1174	0.0061		5.77541	1.17283	0.122
59639	11.5	0.1184	0.0063		5.8569	1.18282	0.126
60139	11.48	0.1196	0.0063		5.84672	1.19481	0.126
60639	11.82	0.1206	0.0064		6.01988	1.2048	0.128
61139	11.9	0.1217	0.0065		6.06062	1.21578	0.13
61639	11.96	0.1226	0.0065		6.09118	1.22478	0.13
62139	12.06	0.1235	0.0065		6.14211	1.23377	0.13
62639	12.28	0.1245	0.0066		6.25415	1.24376	0.132
63139	12.36	0.1255	0.0067		6.2949	1.25375	0.134
63639	12.52	0.1263	0.0067		6.37638	1.26174	0.134
64139	12.64	0.1273	0.0068		6.4375	1.27173	0.136
64639	12.88	0.1281	0.0069		6.55973	1.27972	0.138
65139	13.12	0.1293	0.0069		6.68196	1.29171	0.138
65639	13.08	0.1303	0.007		6.66159	1.3017	0.14
66139	13.26	0.1313	0.0071		6.75326	1.31169	0.142
66639	13.4	0.1322	0.0072		6.82456	1.32068	0.144
67139	13.6	0.1334	0.0072		6.92642	1.33267	0.144
67639	13.72	0.1344	0.0073		6.98754	1.34266	0.146
68139	13.8	0.1352	0.0074		7.02828	1.35065	0.148
68639	13.98	0.1363	0.0076		7.11996	1.36164	0.152
69139	14.02	0.1374	0.0078		7.14033	1.37263	0.156
69639	14.24	0.1383	0.0075		7.25237	1.38162	0.15
70139	14.44	0.1393	0.0081		7.35423	1.39161	0.162
70639	14.56	0.1404	0.0084		7.41535	1.4026	0.168
71139	14.68	0.1413	0.0086		7.47646	1.41159	0.172
71639	14.8	0.1423	0.0088		7.53758	1.42158	0.176
72139	14.96	0.1433	0.0089		7.61907	1.43157	0.178
72639	15.1	0.1443	0.0092		7.69037	1.44156	0.184
73139	15.24	0.1454	0.0092		7.76167	1.45255	0.184
73639	15.38	0.1464	0.0096		7.83297	1.46254	0.192
74139	15.54	0.1474	0.0099		7.91446	1.47253	0.198
74639	15.72	0.1483	0.0101		8.00613	1.48152	0.202
75139	15.9	0.1495	0.0103		8.0978	1.49351	0.206
75639	16.02	0.1503	0.0106		8.15892	1.5015	0.212
76139	16.26	0.1514	0.0105		8.28115	1.51249	0.21
76639	16.44	0.1524	0.0108		8.37282	1.52248	0.216
77139	16.46	0.1534	0.0111		8.38301	1.53247	0.222
77639	16.62	0.1544	0.0113		8.4645	1.54246	0.226
78139	16.78	0.1554	0.0115		8.54598	1.55245	0.23
78639	16.88	0.1563	0.0118		8.59691	1.56144	0.236
79139	17.02	0.1574	0.012		8.66821	1.57243	0.24
79639	17.14	0.1585	0.0119		8.72933	1.58342	0.238
80139	17.36	0.1593	0.0123		8.84138	1.59141	0.246
80639	17.38	0.1603	0.0127		8.85156	1.6014	0.254
81139	17.68	0.1613	0.0129		9.00435	1.61139	0.258
81639	17.8	0.1623	0.0132		9.06547	1.62138	0.264
82139	17.94	0.1633	0.0133		9.13677	1.63137	0.266
82639	18.04	0.1643	0.0135		9.1877	1.64136	0.27
83139	18.24	0.1652	0.0136		9.28956	1.65035	0.272
83639	18.5	0.1662	0.0138		9.42197	1.66034	0.276
84139	18.7	0.1672	0.0143		9.52383	1.67033	0.286
84639	18.76	0.1684	0.0146		9.55439	1.68232	0.292
85139	18.92	0.1694	0.0148		9.63588	1.69231	0.296
85639	19.06	0.1704	0.015		9.70718	1.7023	0.3
86139	19.32	0.1715	0.0152		9.8396	1.71329	0.304
86639	19.34	0.1725	0.0153		9.84978	1.72328	0.306
87139	19.52	0.1733	0.0158		9.94145	1.73127	0.316
87639	19.68	0.1745	0.016		10.0229	1.74326	0.32
88139	19.7	0.1754	0.0163		10.0331	1.75225	0.326
88639	19.88	0.1764	0.0165		10.1248	1.76224	0.33
89139	19.96	0.1773	0.0168		10.1655	1.77123	0.336
89639	20.24	0.1782	0.0169		10.3081	1.78022	0.338
90139	20.44	0.1792	0.0169		10.41	1.79021	0.338
90639	20.44	0.1801	0.0173		10.41	1.7992	0.346
91139	20.74	0.1811	0.0177		10.5628	1.80919	0.354
91639	20.8	0.1822	0.0181		10.5934	1.82018	0.362
92139	20.98	0.1832	0.0183		10.685	1.83017	0.366
92639	21.12	0.1843	0.0185		10.7563	1.84116	0.37
93139	21.26	0.1852	0.0187		10.8276	1.85015	0.374
93639	21.4	0.1863	0.0188		10.8989	1.86114	0.376
94139	21.58	0.1873	0.0193		10.9906	1.87113	0.386
94639	21.72	0.1883	0.0196		11.0619	1.88112	0.392
95139	21.84	0.1892	0.0199		11.123	1.89011	0.398
95639	22.04	0.1901	0.0202		11.2249	1.8991	0.404
96139	22.22	0.1912	0.0204		11.3166	1.91009	0.408
96639	22.46	0.1922	0.0206		11.4388	1.92008	0.412
97139	22.6	0.1931	0.0206		11.5101	1.92907	0.412
97639	22.7	0.1943	0.0209		11.561	1.94106	0.418
98139	22.8	0.1952	0.0212		11.6119	1.95005	0.424
98639	23.06	0.1963	0.0216		11.7444	1.96104	0.432
99139	23.14	0.1971	0.022		11.7851	1.96903	0.44
99639	23.18	0.1982	0.0222		11.8055	1.98002	0.444
100139	23.26	0.1991	0.0225		11.8462	1.98901	0.45
100639	23.54	0.2002	0.0227		11.9888	2	0.454
101139	23.78	0.2011	0.023		12.1111	2.00899	0.46
101639	23.94	0.2021	0.0232		12.1925	2.01898	0.464
102139	24.06	0.2032	0.0234		12.2537	2.02997	0.468
102639	24.16	0.2043	0.0239		12.3046	2.04096	0.478
103139	24.4	0.205	0.0243		12.4268	2.04795	0.486
103639	24.44	0.2062	0.0245		12.4472	2.05994	0.49
104139	24.58	0.2071	0.0248		12.5185	2.06893	0.496
104639	24.82	0.2082	0.0252		12.6407	2.07992	0.504
105139	24.9	0.2092	0.0254		12.6815	2.08991	0.508
105639	25.02	0.2101	0.0256		12.7426	2.0989	0.512
106139	25.14	0.2111	0.0259		12.8037	2.10889	0.518
106639	25.38	0.2122	0.0265		12.9259	2.11988	0.53
107139	25.5	0.2133	0.0269		12.987	2.13087	0.538
107639	25.7	0.2142	0.0271		13.0889	2.13986	0.542
108139	25.8	0.2151	0.0274		13.1398	2.14885	0.548
108639	25.88	0.2162	0.0276		13.1806	2.15984	0.552
109139	26	0.2173	0.028		13.2417	2.17083	0.56
109639	26.26	0.2182	0.0281		13.3741	2.17982	0.562
110139	26.34	0.2193	0.0285		13.4149	2.19081	0.57
110639	26.46	0.2202	0.0289		13.476	2.1998	0.578
111139	26.62	0.2213	0.0292		13.5575	2.21079	0.584
111639	26.82	0.2221	0.0295		13.6593	2.21878	0.59
112139	26.94	0.2231	0.0298		13.7204	2.22877	0.596
112639	27.08	0.2241	0.0301		13.7917	2.23876	0.602
113139	27.12	0.2251	0.0303		13.8121	2.24875	0.606
113639	27.28	0.2262	0.0307		13.8936	2.25974	0.614
114139	27.42	0.227	0.0308		13.9649	2.26773	0.616
114639	27.48	0.228	0.0313		13.9954	2.27772	0.626
115139	27.72	0.2291	0.0318		14.1177	2.28871	0.636
115639	28.02	0.2303	0.0321		14.2705	2.3007	0.642
116139	28.12	0.2316	0.0325		14.3214	2.31369	0.65
116639	28.32	0.2326	0.0328		14.4233	2.32368	0.656
117139	28.4	0.2337	0.0333		14.464	2.33467	0.666
117639	28.52	0.2348	0.0335		14.5251	2.34565	0.67
118139	28.7	0.2357	0.0339		14.6168	2.35465	0.678
118639	28.74	0.2366	0.0343		14.6372	2.36364	0.686
119139	28.78	0.2375	0.0347		14.6575	2.37263	0.694
119639	29	0.2384	0.035		14.7696	2.38162	0.7
120139	29.04	0.2394	0.0352		14.79	2.39161	0.704
120639	29.08	0.2403	0.0355		14.8103	2.4006	0.71
121139	29.28	0.2413	0.0358		14.9122	2.41059	0.716
121639	29.42	0.2422	0.0362		14.9835	2.41958	0.724
122139	29.56	0.2432	0.0363		15.0548	2.42957	0.726
122639	29.56	0.2443	0.0368		15.0548	2.44056	0.736
123139	29.9	0.2452	0.0371		15.2279	2.44955	0.742
123639	29.94	0.2463	0.0375		15.2483	2.46054	0.75
124139	30.14	0.2472	0.0378		15.3502	2.46953	0.756
124639	30.26	0.2483	0.0381		15.4113	2.48052	0.762
125139	30.36	0.2493	0.0384		15.4622	2.49051	0.768
125639	30.4	0.2503	0.0387		15.4826	2.5005	0.774
126139	30.62	0.2513	0.039		15.5946	2.51049	0.78
126639	30.74	0.2522	0.0393		15.6558	2.51948	0.786
127139	30.82	0.2532	0.0398		15.6965	2.52947	0.796
127639	30.92	0.2541	0.0402		15.7474	2.53846	0.804
128139	31.1	0.2552	0.0404		15.8391	2.54945	0.808
128639	31.14	0.2562	0.0406		15.8595	2.55944	0.812
129139	31.34	0.257	0.0411		15.9613	2.56743	0.822
129639	31.48	0.258	0.0414		16.0326	2.57742	0.828
130139	31.7	0.259	0.0416		16.1447	2.58741	0.832
130639	31.8	0.2602	0.0421		16.1956	2.5994	0.842
131139	31.94	0.2612	0.0423		16.2669	2.60939	0.846
131639	32.08	0.2623	0.0429		16.3382	2.62038	0.858
132139	32.2	0.2633	0.0434		16.3993	2.63037	0.868
132639	32.26	0.2643	0.0437		16.4299	2.64036	0.874
133139	32.4	0.2652	0.0442		16.5012	2.64935	0.884
133639	32.5	0.266	0.0444		16.5521	2.65734	0.888
134139	32.66	0.2673	0.0446		16.6336	2.67033	0.892
134639	32.72	0.2682	0.045		16.6642	2.67932	0.9
135139	32.82	0.2692	0.0455		16.7151	2.68931	0.91
135639	32.98	0.2703	0.0459		16.7966	2.7003	0.918
136139	33.16	0.271	0.0464		16.8882	2.70729	0.928
136639	33.24	0.2721	0.0468		16.929	2.71828	0.936
137139	33.32	0.2731	0.0472		16.9697	2.72827	0.944
137639	33.52	0.2742	0.0476		17.0716	2.73926	0.952
138139	33.6	0.2751	0.0478		17.1123	2.74825	0.956
138639	33.76	0.2761	0.0482		17.1938	2.75824	0.964
139139	33.88	0.2771	0.0485		17.2549	2.76823	0.97
139639	34.12	0.2782	0.0491		17.3772	2.77922	0.982
140139	34.24	0.2793	0.0492		17.4383	2.79021	0.984
140639	34.42	0.2803	0.0496		17.53	2.8002	0.992
141139	34.52	0.2814	0.0502		17.5809	2.81119	1.004
141639	34.68	0.2824	0.0505		17.6624	2.82118	1.01
142139	34.7	0.2835	0.051		17.6726	2.83217	1.02
142639	34.82	0.2845	0.0513		17.7337	2.84216	1.026
143139	34.9	0.2853	0.0516		17.7744	2.85015	1.032
143639	35.02	0.2862	0.0519		17.8355	2.85914	1.038
144139	35.04	0.2873	0.0524		17.8457	2.87013	1.048
144639	35.24	0.2883	0.053		17.9476	2.88012	1.06
145139	35.3	0.2894	0.0532		17.9781	2.89111	1.064
145639	35.5	0.2902	0.0538		18.08	2.8991	1.076
146139	35.52	0.2913	0.0543		18.0902	2.91009	1.086
146639	35.84	0.2922	0.0547		18.2532	2.91908	1.094
147139	35.88	0.2933	0.0552		18.2735	2.93007	1.104
147639	35.98	0.2944	0.0555		18.3245	2.94106	1.11
148139	36.1	0.2953	0.0559		18.3856	2.95005	1.118
148639	36.12	0.2965	0.0563		18.3958	2.96204	1.126
149139	36.3	0.2974	0.0566		18.4874	2.97103	1.132
149639	36.4	0.2982	0.0571		18.5384	2.97902	1.142
150139	36.58	0.2993	0.0575		18.63	2.99001	1.15
150639	36.7	0.3004	0.0581		18.6912	3.001	1.162
151139	36.8	0.3013	0.0585		18.7421	3.00999	1.17
151639	36.94	0.3022	0.059		18.8134	3.01898	1.18
152139	36.88	0.3031	0.0594		18.7828	3.02797	1.188
152639	37.02	0.3041	0.0598		18.8541	3.03796	1.196
153139	37.1	0.3053	0.0602		18.8949	3.04995	1.204
153639	37.34	0.3062	0.0606		19.0171	3.05894	1.212
154139	37.44	0.3071	0.0607		19.068	3.06793	1.214
154639	37.42	0.3083	0.0612		19.0578	3.07992	1.224
155139	37.62	0.3091	0.0616		19.1597	3.08791	1.232
155639	37.72	0.3103	0.0622		19.2106	3.0999	1.244
156139	37.84	0.3113	0.0628		19.2718	3.10989	1.256
156639	37.9	0.3123	0.0634		19.3023	3.11988	1.268
157139	37.98	0.3132	0.0637		19.3431	3.12887	1.274
157639	38.02	0.3142	0.0642		19.3634	3.13886	1.284
158139	38.2	0.3152	0.0645		19.4551	3.14885	1.29
158639	38.26	0.3161	0.065		19.4857	3.15784	1.3
159139	38.42	0.3174	0.0653		19.5671	3.17083	1.306
159639	38.46	0.3183	0.0658		19.5875	3.17982	1.316
160139	38.52	0.3193	0.0663		19.6181	3.18981	1.326
160639	38.7	0.3203	0.0667		19.7097	3.1998	1.334
161139	38.78	0.3213	0.0674		19.7505	3.20979	1.348
161639	38.9	0.3223	0.0679		19.8116	3.21978	1.358
162139	38.9	0.3233	0.0683		19.8116	3.22977	1.366
162639	39.08	0.3241	0.0687		19.9033	3.23776	1.374
163139	39.1	0.3251	0.0691		19.9135	3.24775	1.382
163639	39.26	0.3261	0.0696		19.995	3.25774	1.392
164139	39.3	0.3271	0.07		20.0153	3.26773	1.4
164639	39.38	0.3281	0.0705		20.0561	3.27772	1.41
165139	39.5	0.329	0.0709		20.1172	3.28671	1.418
165639	39.58	0.33	0.0712		20.1579	3.2967	1.424
166139	39.8	0.3311	0.0719		20.27	3.30769	1.438
166639	39.88	0.3322	0.0726		20.3107	3.31868	1.452
167139	39.96	0.3332	0.0732		20.3515	3.32867	1.464
167639	40.12	0.3342	0.0737		20.4329	3.33866	1.474
168139	40.14	0.3352	0.0741		20.4431	3.34865	1.482
168639	40.28	0.3363	0.0746		20.5144	3.35964	1.492
169139	40.38	0.3372	0.075		20.5654	3.36863	1.5
169639	40.44	0.3382	0.0754		20.5959	3.37862	1.508
170139	40.62	0.3392	0.076		20.6876	3.38861	1.52
170639	40.64	0.3403	0.0765		20.6978	3.3996	1.53
171139	40.76	0.3414	0.0771		20.7589	3.41059	1.542
171639	40.9	0.3423	0.0778		20.8302	3.41958	1.556
172139	40.96	0.3434	0.0783		20.8608	3.43057	1.566
172639	40.94	0.3443	0.0788		20.8506	3.43956	1.576
173139	41.06	0.3454	0.0793		20.9117	3.45055	1.586
173639	41.18	0.3463	0.0797		20.9728	3.45954	1.594
174139	41.16	0.3472	0.0801		20.9626	3.46853	1.602
174639	41.28	0.3482	0.0807		21.0237	3.47852	1.614
175139	41.52	0.3493	0.0812		21.146	3.48951	1.624
175639	41.5	0.3502	0.0817		21.1358	3.4985	1.634
176139	41.48	0.3512	0.0821		21.1256	3.50849	1.642
176639	41.72	0.3523	0.0828		21.2478	3.51948	1.656
177139	41.88	0.3531	0.0834		21.3293	3.52747	1.668
177639	41.86	0.3542	0.084		21.3191	3.53846	1.68
178139	42	0.355	0.0844		21.3904	3.54645	1.688
178639	42.04	0.356	0.0849		21.4108	3.55644	1.698
179139	42.02	0.3571	0.0854		21.4006	3.56743	1.708
179639	42.2	0.3582	0.0859		21.4923	3.57842	1.718
180139	42.24	0.3592	0.0865		21.5127	3.58841	1.73
180639	42.46	0.3602	0.0869		21.6247	3.5984	1.738
181139	42.52	0.3612	0.0876		21.6553	3.60839	1.752
181639	42.48	0.3622	0.0879		21.6349	3.61838	1.758
182139	42.56	0.3631	0.0886		21.6756	3.62737	1.772
182639	42.6	0.3642	0.0894		21.696	3.63836	1.788
183139	42.78	0.3652	0.0898		21.7877	3.64835	1.796
183639	42.92	0.3661	0.0904		21.859	3.65734	1.808
184139	42.9	0.3669	0.0908		21.8488	3.66533	1.816
184639	42.92	0.368	0.0915		21.859	3.67632	1.83
185139	43.08	0.3691	0.092		21.9405	3.68731	1.84
185639	43.18	0.3701	0.0924		21.9914	3.6973	1.848
186139	43.16	0.3712	0.0929		21.9812	3.70829	1.858
186639	43.32	0.3723	0.0934		22.0627	3.71928	1.868
187139	43.48	0.3733	0.0943		22.1442	3.72927	1.886
187639	43.48	0.3743	0.095		22.1442	3.73926	1.9
188139	43.52	0.3752	0.0956		22.1646	3.74825	1.912
188639	43.56	0.3763	0.0963		22.1849	3.75924	1.926
189139	43.64	0.3772	0.0967		22.2257	3.76823	1.934
189639	43.8	0.3782	0.0973		22.3072	3.77822	1.946
190139	43.8	0.3793	0.0979		22.3072	3.78921	1.958
190639	43.84	0.3803	0.0984		22.3275	3.7992	1.968
191139	43.88	0.3813	0.0992		22.3479	3.80919	1.984
191639	43.94	0.3824	0.0996		22.3785	3.82018	1.992
192139	44.08	0.3834	0.1004		22.4498	3.83017	2.008
192639	44.18	0.3844	0.1011		22.5007	3.84016	2.022
193139	44.2	0.3854	0.1017		22.5109	3.85015	2.034
193639	44.24	0.3864	0.1021		22.5312	3.86014	2.042
194139	44.3	0.3874	0.1026		22.5618	3.87013	2.052
194639	44.3	0.3883	0.1032		22.5618	3.87912	2.064
195139	44.4	0.3893	0.1037		22.6127	3.88911	2.074
195639	44.56	0.3902	0.1042		22.6942	3.8981	2.084
196139	44.58	0.3912	0.1049		22.7044	3.90809	2.098
196639	44.68	0.3922	0.1054		22.7553	3.91808	2.108
197139	44.68	0.3933	0.1062		22.7553	3.92907	2.124
197639	44.62	0.3942	0.1068		22.7248	3.93806	2.136
198139	44.86	0.3952	0.1074		22.847	3.94805	2.148
198639	44.86	0.3962	0.1079		22.847	3.95804	2.158
199139	44.9	0.3972	0.1085		22.8674	3.96803	2.17
199639	44.88	0.3982	0.1092		22.8572	3.97802	2.184
200139	45.12	0.3992	0.1097		22.9794	3.98801	2.194
200639	45.08	0.4002	0.1103		22.9591	3.998	2.206
201139	45.2	0.4013	0.1109		23.0202	4.00899	2.218
201639	45.1	0.4022	0.1115		22.9692	4.01798	2.23
202139	45.14	0.4032	0.1123		22.9896	4.02797	2.246
202639	45.28	0.4042	0.1129		23.0609	4.03796	2.258
203139	45.34	0.4052	0.1136		23.0915	4.04795	2.272
203639	45.48	0.4063	0.1142		23.1628	4.05894	2.284
204139	45.48	0.4073	0.1148		23.1628	4.06893	2.296
204639	45.7	0.4081	0.1154		23.2748	4.07692	2.308
205139	45.7	0.4092	0.116		23.2748	4.08791	2.32
205639	45.74	0.4101	0.1166		23.2952	4.0969	2.332
206139	45.92	0.4113	0.1172		23.3869	4.10889	2.344
206639	45.9	0.4123	0.1179		23.3767	4.11888	2.358
207139	45.94	0.4133	0.1187		23.397	4.12887	2.374
207639	46	0.4143	0.1196		23.4276	4.13886	2.392
208139	46.12	0.4153	0.1202		23.4887	4.14885	2.404
208639	46.08	0.4163	0.1208		23.4684	4.15884	2.416
209139	46.26	0.4171	0.1214		23.56	4.16683	2.428
209639	46.16	0.4183	0.1221		23.5091	4.17882	2.442
210139	46.26	0.4192	0.1227		23.56	4.18781	2.454
210639	46.34	0.4202	0.1233		23.6008	4.1978	2.466
211139	46.28	0.4211	0.1239		23.5702	4.20679	2.478
211639	46.44	0.422	0.1246		23.6517	4.21578	2.492
212139	46.48	0.4231	0.1254		23.6721	4.22677	2.508
212639	46.5	0.4241	0.1263		23.6823	4.23676	2.526
213139	46.62	0.4251	0.127		23.7434	4.24675	2.54
213639	46.62	0.4261	0.1276		23.7434	4.25674	2.552
214139	46.56	0.4271	0.1282		23.7128	4.26673	2.564
214639	46.66	0.4281	0.1289		23.7637	4.27672	2.578
215139	46.84	0.4291	0.1296		23.8554	4.28671	2.592
215639	46.8	0.4302	0.1302		23.835	4.2977	2.604
216139	46.94	0.4312	0.131		23.9063	4.30769	2.62
216639	46.98	0.4323	0.1315		23.9267	4.31868	2.63
217139	46.94	0.4333	0.1325		23.9063	4.32867	2.65
217639	47.1	0.4344	0.1332		23.9878	4.33966	2.664
218139	47.04	0.4354	0.1339		23.9573	4.34965	2.678
218639	47.1	0.4363	0.1345		23.9878	4.35864	2.69
219139	47.18	0.4373	0.1352		24.0286	4.36863	2.704
219639	47.16	0.4383	0.1359		24.0184	4.37862	2.718
220139	47.28	0.4393	0.1366		24.0795	4.38861	2.732
220639	47.32	0.4403	0.1372		24.0999	4.3986	2.744
221139	47.36	0.4414	0.1379		24.1202	4.40959	2.758
221639	47.44	0.4423	0.1387		24.161	4.41858	2.774
222139	47.38	0.4433	0.1397		24.1304	4.42857	2.794
222639	47.52	0.4442	0.1405		24.2017	4.43756	2.81
223139	47.62	0.4452	0.1412		24.2527	4.44755	2.824
223639	47.56	0.4462	0.1418		24.2221	4.45754	2.836
224139	47.6	0.4473	0.1425		24.2425	4.46853	2.85
224639	47.7	0.4483	0.1432		24.2934	4.47852	2.864
225139	47.62	0.4492	0.1438		24.2527	4.48751	2.876
225639	47.64	0.4501	0.1446		24.2629	4.4965	2.892
226139	47.72	0.4513	0.1452		24.3036	4.50849	2.904
226639	47.82	0.4522	0.146		24.3545	4.51748	2.92
227139	47.8	0.4534	0.1469		24.3443	4.52947	2.938
227639	47.86	0.4544	0.1475		24.3749	4.53946	2.95
228139	47.9	0.4553	0.1482		24.3953	4.54845	2.964
228639	47.88	0.4563	0.1491		24.3851	4.55844	2.982
229139	47.96	0.4573	0.1497		24.4258	4.56843	2.994
229639	47.88	0.4583	0.1504		24.3851	4.57842	3.008
230139	48	0.4593	0.151		24.4462	4.58841	3.02
230639	48.06	0.4603	0.1518		24.4768	4.5984	3.036
231139	48.1	0.4614	0.1527		24.4971	4.60939	3.054
231639	48.08	0.4623	0.1535		24.4869	4.61838	3.07
232139	48.04	0.4633	0.1544		24.4666	4.62837	3.088
232639	48.08	0.4643	0.1551		24.4869	4.63836	3.102
233139	48.2	0.4652	0.1559		24.5481	4.64735	3.118
233639	48.26	0.4662	0.1565		24.5786	4.65734	3.13
234139	48.24	0.4673	0.1573		24.5684	4.66833	3.146
234639	48.24	0.4683	0.1581		24.5684	4.67832	3.162
235139	48.4	0.4692	0.1588		24.6499	4.68731	3.176
235639	48.4	0.4702	0.1596		24.6499	4.6973	3.192
236139	48.52	0.4712	0.1603		24.711	4.70729	3.206
236639	48.46	0.4722	0.1612		24.6805	4.71728	3.224
237139	48.54	0.4732	0.162		24.7212	4.72727	3.24
237639	48.4	0.4741	0.1628		24.6499	4.73626	3.256
238139	48.44	0.4751	0.1635		24.6703	4.74625	3.27
238639	48.6	0.4762	0.1643		24.7518	4.75724	3.286
239139	48.62	0.4772	0.1651		24.762	4.76723	3.302
239639	48.74	0.4784	0.1659		24.8231	4.77922	3.318
240139	48.64	0.4793	0.1667		24.7721	4.78821	3.334
240639	48.68	0.4802	0.1675		24.7925	4.7972	3.35
241139	48.76	0.4812	0.1684		24.8333	4.80719	3.368
241639	48.72	0.4822	0.1694		24.8129	4.81718	3.388
242139	48.82	0.4832	0.1701		24.8638	4.82717	3.402
242639	48.88	0.4843	0.1708		24.8944	4.83816	3.416
243139	48.84	0.4853	0.1717		24.874	4.84815	3.434
243639	48.88	0.4863	0.1726		24.8944	4.85814	3.452
244139	48.88	0.4874	0.1734		24.8944	4.86913	3.468
244639	48.88	0.4884	0.1741		24.8944	4.87912	3.482
245139	48.9	0.4894	0.1749		24.9046	4.88911	3.498
245639	48.88	0.4905	0.1759		24.8944	4.9001	3.518
246139	48.98	0.4915	0.177		24.9453	4.91009	3.54
246639	48.96	0.4925	0.1778		24.9351	4.92008	3.556
247139	48.9	0.4934	0.1786		24.9046	4.92907	3.572
247639	48.94	0.4944	0.1793		24.9249	4.93906	3.586
248139	48.96	0.4953	0.1802		24.9351	4.94805	3.604
248639	48.9	0.4963	0.1809		24.9046	4.95804	3.618
249139	48.96	0.4973	0.1817		24.9351	4.96803	3.634
249639	49.08	0.4984	0.1825		24.9962	4.97902	3.65
250139	49.1	0.4994	0.1833		25.0064	4.98901	3.666
250639	49.04	0.5005	0.1842		24.9759	5	3.684
251139	47.92	0.5021	0.1864		24.4055	5.01598	3.728
251639	47.92	0.5021	0.1864		24.4055	5.01598	3.728
252139	47.92	0.5021	0.1864		24.4055	5.01598	3.728
252639	47.92	0.5021	0.1864		24.4055	5.01598	3.728
253139	47.34	0.5058	0.1903		24.1101	5.05295	3.806
253639	47.34	0.5058	0.1903		24.1101	5.05295	3.806
254139	47.66	0.5079	0.1951		24.273	5.07393	3.902
254639	47.66	0.5079	0.1951		24.273	5.07393	3.902
255139	47.78	0.5096	0.1965		24.3342	5.09091	3.93
255639	47.78	0.5096	0.1965		24.3342	5.09091	3.93
256139	47.52	0.5113	0.1978		24.2017	5.10789	3.956
256639	47.44	0.5129	0.1985		24.161	5.12388	3.97
257139	47.44	0.5129	0.1985		24.161	5.12388	3.97
257639	47.7	0.5147	0.1997		24.2934	5.14186	3.994
258139	47.56	0.5157	0.2007		24.2221	5.15185	4.014
258639	47.5	0.5163	0.2013		24.1916	5.15784	4.026
259139	47.66	0.5172	0.2022		24.273	5.16683	4.044
259639	47.68	0.5182	0.2028		24.2832	5.17682	4.056
260139	47.68	0.5195	0.2037		24.2832	5.18981	4.074
260639	47.78	0.5205	0.2042		24.3342	5.1998	4.084
261139	47.62	0.5216	0.205		24.2527	5.21079	4.1
261639	47.8	0.5225	0.206		24.3443	5.21978	4.12
262139	47.8	0.5234	0.2068		24.3443	5.22877	4.136
262639	47.78	0.5244	0.2075		24.3342	5.23876	4.15
263139	47.88	0.5255	0.2084		24.3851	5.24975	4.168
263639	47.76	0.5265	0.2092		24.324	5.25974	4.184
264139	47.88	0.5275	0.21		24.3851	5.26973	4.2
264639	47.78	0.5283	0.2107		24.3342	5.27772	4.214
265139	47.88	0.5294	0.2115		24.3851	5.28871	4.23
265639	47.94	0.5303	0.2124		24.4156	5.2977	4.248
266139	44.52	0.5305	0.2147		22.6738	5.2997	4.294
266639	44.52	0.5305	0.2147		22.6738	5.2997	4.294
267139	46.32	0.5338	0.2177		23.5906	5.33267	4.354
267639	46.4	0.5341	0.2187		23.6313	5.33566	4.374
268139	46.48	0.5354	0.2196		23.6721	5.34865	4.392
268639	46.64	0.5365	0.2205		23.7536	5.35964	4.41
269139	46.62	0.5375	0.2215		23.7434	5.36963	4.43
269639	46.54	0.5384	0.2226		23.7026	5.37862	4.452
270139	46.52	0.5393	0.2235		23.6924	5.38761	4.47
270639	46.44	0.5407	0.2242		23.6517	5.4016	4.484
271139	45.28	0.541	0.226		23.0609	5.4046	4.52
271639	43.62	0.542	0.2272		22.2155	5.41459	4.544
272139	44	0.5435	0.2285		22.409	5.42957	4.57
272639	44	0.5435	0.2285		22.409	5.42957	4.57
273139	44.32	0.545	0.2303		22.572	5.44456	4.606
273639	44.76	0.5466	0.2314		22.7961	5.46054	4.628
274139	44.76	0.5466	0.2314		22.7961	5.46054	4.628
274639	44.76	0.5466	0.2314		22.7961	5.46054	4.628
275139	46.02	0.5493	0.2341		23.4378	5.48751	4.682
275639	45.82	0.5506	0.2353		23.3359	5.5005	4.706
276139	45.76	0.551	0.2363		23.3054	5.5045	4.726
276639	45.96	0.5524	0.2371		23.4072	5.51848	4.742
277139	45.98	0.5535	0.2381		23.4174	5.52947	4.762
277639	46.1	0.5546	0.2392		23.4785	5.54046	4.784
278139	46.06	0.5556	0.2403		23.4582	5.55045	4.806
278639	45.94	0.5565	0.2415		23.397	5.55944	4.83
279139	45.88	0.5574	0.2426		23.3665	5.56843	4.852
279639	45.88	0.5583	0.2435		23.3665	5.57742	4.87
280139	46	0.5592	0.2444		23.4276	5.58641	4.888
280639	45.92	0.5605	0.2456		23.3869	5.5994	4.912
281139	45.7	0.5617	0.247		23.2748	5.61139	4.94
281639	45.7	0.5617	0.247		23.2748	5.61139	4.94
282139	45.44	0.5639	0.2503		23.1424	5.63337	5.006
282639	45.44	0.5639	0.2503		23.1424	5.63337	5.006
283139	44.76	0.5658	0.2523		22.7961	5.65235	5.046
283639	44.22	0.5659	0.2533		22.5211	5.65335	5.066
284139	44.58	0.5677	0.2546		22.7044	5.67133	5.092
284639	44.68	0.5679	0.2554		22.7553	5.67333	5.108
285139	45.36	0.5699	0.2567		23.1017	5.69331	5.134
285639	45	0.5701	0.2577		22.9183	5.6953	5.154
286139	45.38	0.5714	0.259		23.1118	5.70829	5.18
286639	45.42	0.5725	0.2601		23.1322	5.71928	5.202
287139	45.36	0.5736	0.2612		23.1017	5.73027	5.224
287639	45.32	0.5746	0.2621		23.0813	5.74026	5.242
288139	45.32	0.5755	0.2633		23.0813	5.74925	5.266
288639	45.44	0.5766	0.2644		23.1424	5.76024	5.288
289139	45.36	0.5776	0.2656		23.1017	5.77023	5.312
289639	45.26	0.5786	0.2672		23.0507	5.78022	5.344
290139	45.26	0.5786	0.2672		23.0507	5.78022	5.344
290639	45.26	0.5786	0.2672		23.0507	5.78022	5.344
291139	45.26	0.5786	0.2672		23.0507	5.78022	5.344
291639	41.16	0.5825	0.2946		20.9626	5.81918	5.892
292139	40.98	0.5835	0.2954		20.8709	5.82917	5.908
292639	41.06	0.5843	0.2962		20.9117	5.83716	5.924
293139	41.08	0.5856	0.2971		20.9219	5.85015	5.942
293639	41.06	0.5865	0.298		20.9117	5.85914	5.96
294139	40.96	0.5874	0.2987		20.8608	5.86813	5.974
294639	41.06	0.5882	0.2994		20.9117	5.87612	5.988
295139	41.06	0.5892	0.3001		20.9117	5.88611	6.002
295639	41.08	0.5904	0.3009		20.9219	5.8981	6.018
296139	39.52	0.5921	0.3022		20.1274	5.91508	6.044

## Sheet: F-2
Time: 16:59:23,11/29/2019
diameter: 50	mm	height: 100.5	mm
Vertical 100kN force sensor (vertical force of test piece)
Control mode: displacement	Waveform: ramp
mm/s	End point: 0.4267	mm
time (ms)	vertical force (KN)	vertical deformation (mm)	transverse deformation (mm)		stress	axial strain	transverse strain
0	0	0	0		0	0	0
106	0.06	0.0001	0.0001		0.0305577	0.000999001	0.002
206	1.1	0.0005	-0.0001		0.560225	0.004995	-0.002
306	1.26	0.0018	-0.0004		0.641713	0.017982	-0.008
406	1.46	0.0033	-0.0007		0.743572	0.032967	-0.014
506	1.44	0.0043	-0.0008		0.733386	0.042957	-0.016
606	1.42	0.0049	-0.001		0.7232	0.048951	-0.02
706	1.62	0.0057	-0.0019		0.825059	0.0569431	-0.038
806	1.76	0.0069	-0.0017		0.896361	0.0689311	-0.034
906	1.84	0.0081	-0.002		0.937104	0.0809191	-0.04
1006	1.84	0.0093	-0.0022		0.937104	0.0929071	-0.044
1106	1.94	0.0103	-0.0022		0.988034	0.102897	-0.044
1206	1.98	0.0113	-0.0022		1.00841	0.112887	-0.044
1306	2.08	0.0122	-0.0023		1.05934	0.121878	-0.046
1406	2.14	0.0132	-0.0039		1.08989	0.131868	-0.078
1506	2.2	0.014	-0.004		1.12045	0.13986	-0.08
1606	2.36	0.015	-0.0044		1.20194	0.14985	-0.088
1706	2.46	0.0158	-0.0044		1.25287	0.157842	-0.088
1806	2.44	0.0168	-0.0047		1.24268	0.167832	-0.094
1906	2.54	0.0177	-0.0049		1.29361	0.176823	-0.098
2006	2.72	0.0188	-0.0051		1.38528	0.187812	-0.102
2106	2.8	0.0198	-0.0049		1.42603	0.197802	-0.098
2206	2.92	0.021	-0.0046		1.48714	0.20979	-0.092
2306	3.08	0.022	-0.0047		1.56863	0.21978	-0.094
2406	3.14	0.0231	-0.0048		1.59919	0.230769	-0.096
2506	3.34	0.0241	-0.0052		1.70105	0.240759	-0.104
2606	3.46	0.0251	-0.0055		1.76216	0.250749	-0.11
2706	3.58	0.026	-0.0061		1.82328	0.25974	-0.122
2806	3.7	0.027	-0.0064		1.88439	0.26973	-0.128
2906	3.84	0.0279	-0.0066		1.9557	0.278721	-0.132
3006	3.96	0.0289	-0.0071		2.01681	0.288711	-0.142
3106	4.1	0.0299	-0.0077		2.08811	0.298701	-0.154
3206	4.26	0.0309	-0.008		2.1696	0.308691	-0.16
3306	4.44	0.0317	-0.0083		2.26127	0.316683	-0.166
3406	4.6	0.0326	-0.0084		2.34276	0.325674	-0.168
3506	4.8	0.0336	-0.0083		2.44462	0.335664	-0.166
3606	4.98	0.0346	-0.0083		2.53629	0.345654	-0.166
3706	5.16	0.0356	-0.0081		2.62797	0.355644	-0.162
3806	5.3	0.0366	-0.0079		2.69927	0.365634	-0.158
3906	5.5	0.0375	-0.0077		2.80113	0.374625	-0.154
4006	5.58	0.0386	-0.0074		2.84187	0.385614	-0.148
4106	5.84	0.0395	-0.0076		2.97429	0.394605	-0.152
4206	6	0.0406	-0.0072		3.05577	0.405594	-0.144
4306	6.22	0.0416	-0.0075		3.16782	0.415584	-0.15
4406	6.42	0.0424	-0.0081		3.26968	0.423576	-0.162
4506	6.68	0.0436	-0.0082		3.4021	0.435564	-0.164
4606	6.84	0.0446	-0.0083		3.48358	0.445554	-0.166
4706	7.04	0.0455	-0.0068		3.58544	0.454545	-0.136
4806	7.32	0.0464	-0.007		3.72805	0.463536	-0.14
4906	7.46	0.0475	-0.0069		3.79935	0.474525	-0.138
5006	7.56	0.0484	-0.0066		3.85028	0.483516	-0.132
5106	7.8	0.0495	-0.0065		3.97251	0.494505	-0.13
5206	8.2	0.0503	-0.0064		4.17623	0.502498	-0.128
5306	8.38	0.0514	-0.0066		4.2679	0.513487	-0.132
5406	8.76	0.0524	-0.0063		4.46143	0.523477	-0.126
5506	9.04	0.0534	-0.0063		4.60403	0.533467	-0.126
5606	9.22	0.0545	-0.0064		4.69571	0.544456	-0.128
5706	9.64	0.0555	-0.0064		4.90961	0.554446	-0.128
5806	9.86	0.0566	-0.0064		5.02166	0.565435	-0.128
5906	10.26	0.0576	-0.0064		5.22538	0.575425	-0.128
6006	10.44	0.0587	-0.0063		5.31705	0.586414	-0.126
6106	10.78	0.0596	-0.0062		5.49021	0.595405	-0.124
6206	11.1	0.0606	-0.0061		5.65318	0.605395	-0.122
6306	11.36	0.0617	-0.006		5.7856	0.616384	-0.12
6406	11.64	0.0627	-0.0057		5.9282	0.626374	-0.114
6506	11.96	0.0637	-0.006		6.09118	0.636364	-0.12
6606	12.18	0.0646	-0.0054		6.20322	0.645355	-0.108
6706	12.62	0.0656	-0.0053		6.42731	0.655345	-0.106
6806	12.94	0.0666	-0.0051		6.59029	0.665335	-0.102
6906	13.3	0.0675	-0.0048		6.77363	0.674326	-0.096
7006	13.56	0.0685	-0.005		6.90605	0.684316	-0.1
7106	13.82	0.0694	-0.0053		7.03847	0.693307	-0.106
7206	14.18	0.0706	-0.0052		7.22181	0.705295	-0.104
7306	14.48	0.0714	-0.0038		7.3746	0.713287	-0.076
7406	14.76	0.0726	-0.0034		7.51721	0.725275	-0.068
7506	15.18	0.0735	-0.0033		7.73111	0.734266	-0.066
7606	15.42	0.0745	-0.0027		7.85334	0.744256	-0.054
7706	15.74	0.0756	-0.0025		8.01632	0.755245	-0.05
7806	16.1	0.0766	-0.0023		8.19966	0.765235	-0.046
7906	16.4	0.0774	-0.0021		8.35245	0.773227	-0.042
8006	16.78	0.0786	-0.0017		8.54598	0.785215	-0.034
8106	17.12	0.0795	-0.0013		8.71914	0.794206	-0.026
8206	17.34	0.0806	-0.001		8.83119	0.805195	-0.02
8306	17.7	0.0816	-0.0006		9.01454	0.815185	-0.012
8406	18.02	0.0828	-0.0002		9.17751	0.827173	-0.004
8506	18.4	0.084	0		9.37104	0.839161	0
8606	18.66	0.0849	0.0003		9.50346	0.848152	0.006
8706	18.86	0.086	0.0006		9.60532	0.859141	0.012
8806	19.3	0.0872	0.0008		9.82941	0.871129	0.016
8906	19.52	0.0882	0.0007		9.94145	0.881119	0.014
9006	19.8	0.0893	0.0002		10.0841	0.892108	0.004
9106	20.2	0.0902	0.0002		10.2878	0.901099	0.004
9206	20.48	0.0914	0.0006		10.4304	0.913087	0.012
9306	20.82	0.0925	0.0008		10.6035	0.924076	0.016
9406	21.06	0.0934	0.0013		10.7258	0.933067	0.026
9506	21.28	0.0944	0.0015		10.8378	0.943057	0.03
9606	21.48	0.0955	0.0018		10.9397	0.954046	0.036
9706	21.7	0.0964	0.0022		11.0517	0.963037	0.044
9806	21.96	0.0972	0.0027		11.1841	0.971029	0.054
9906	22.18	0.0982	0.0028		11.2962	0.981019	0.056
10006	22.34	0.0991	0.0045		11.3777	0.99001	0.09
10106	22.68	0.1001	0.0054		11.5508	1	0.108
10206	22.86	0.1012	0.0058		11.6425	1.01099	0.116
10306	23.02	0.1021	0.006		11.724	1.01998	0.12
10406	23.4	0.1029	0.0063		11.9175	1.02797	0.126
10506	23.52	0.104	0.0064		11.9786	1.03896	0.128
10606	23.8	0.1048	0.0067		12.1212	1.04695	0.134
10706	24.08	0.1058	0.0072		12.2638	1.05694	0.144
10806	24.22	0.1069	0.0076		12.3351	1.06793	0.152
10906	24.4	0.1078	0.0078		12.4268	1.07692	0.156
11006	24.7	0.1089	0.0079		12.5796	1.08791	0.158
11106	24.88	0.1098	0.0082		12.6713	1.0969	0.164
11206	25.12	0.1108	0.0086		12.7935	1.10689	0.172
11306	25.36	0.1118	0.0091		12.9157	1.11688	0.182
11406	25.56	0.1127	0.0094		13.0176	1.12587	0.188
11506	25.9	0.1138	0.0097		13.1908	1.13686	0.194
11606	26.04	0.1149	0.0099		13.2621	1.14785	0.198
11706	26.48	0.1157	0.0106		13.4862	1.15584	0.212
11806	26.62	0.1168	0.0094		13.5575	1.16683	0.188
11906	26.88	0.1178	0.0107		13.6899	1.17682	0.214
12006	26.96	0.1189	0.0114		13.7306	1.18781	0.228
12106	27.18	0.1198	0.0117		13.8427	1.1968	0.234
12206	27.42	0.1208	0.012		13.9649	1.20679	0.24
12306	27.74	0.1218	0.0125		14.1279	1.21678	0.25
12406	27.88	0.1229	0.0122		14.1992	1.22777	0.244
12506	28.14	0.1237	0.011		14.3316	1.23576	0.22
12606	28.26	0.1248	0.0123		14.3927	1.24675	0.246
12706	28.5	0.1257	0.0128		14.5149	1.25574	0.256
12806	28.72	0.1268	0.0142		14.627	1.26673	0.284
12906	28.98	0.1279	0.0141		14.7594	1.27772	0.282
13006	29.24	0.1289	0.0145		14.8918	1.28771	0.29
13106	29.46	0.1298	0.0134		15.0039	1.2967	0.268
13206	29.58	0.1308	0.0137		15.065	1.30669	0.274
13306	29.88	0.132	0.0141		15.2178	1.31868	0.282
13406	30.1	0.1328	0.0145		15.3298	1.32667	0.29
13506	30.34	0.1339	0.0161		15.452	1.33766	0.322
13606	30.58	0.135	0.0168		15.5743	1.34865	0.336
13706	30.74	0.1358	0.0173		15.6558	1.35664	0.346
13806	30.86	0.137	0.0175		15.7169	1.36863	0.35
13906	31.16	0.1379	0.0178		15.8697	1.37762	0.356
14006	31.32	0.1389	0.0184		15.9511	1.38761	0.368
14106	31.42	0.1398	0.0189		16.0021	1.3966	0.378
14206	31.68	0.1409	0.0191		16.1345	1.40759	0.382
14306	31.98	0.1418	0.0193		16.2873	1.41658	0.386
14406	32.04	0.1429	0.019		16.3178	1.42757	0.38
14506	32.22	0.144	0.0198		16.4095	1.43856	0.396
14606	32.58	0.145	0.0188		16.5929	1.44855	0.376
14706	32.66	0.1459	0.0209		16.6336	1.45754	0.418
14806	32.92	0.147	0.0205		16.766	1.46853	0.41
14906	32.98	0.1481	0.0214		16.7966	1.47952	0.428
15006	33.22	0.149	0.0221		16.9188	1.48851	0.442
15106	33.4	0.15	0.0225		17.0105	1.4985	0.45
15206	33.52	0.1509	0.0219		17.0716	1.50749	0.438
15306	33.78	0.1519	0.0221		17.204	1.51748	0.442
15406	33.86	0.1529	0.0236		17.2448	1.52747	0.472
15506	34.08	0.154	0.0241		17.3568	1.53846	0.482
15606	34.28	0.1549	0.0246		17.4587	1.54745	0.492
15706	34.4	0.1558	0.0246		17.5198	1.55644	0.492
15806	34.64	0.1568	0.025		17.642	1.56643	0.5
15906	34.82	0.1579	0.0258		17.7337	1.57742	0.516
16006	34.96	0.1589	0.026		17.805	1.58741	0.52
16106	35.16	0.1598	0.0255		17.9068	1.5964	0.51
16206	35.34	0.1609	0.0269		17.9985	1.60739	0.538
16306	35.54	0.1619	0.0275		18.1004	1.61738	0.55
16406	35.68	0.1628	0.0279		18.1717	1.62637	0.558
16506	35.86	0.1638	0.028		18.2633	1.63636	0.56
16606	36.06	0.1648	0.0287		18.3652	1.64635	0.574
16706	36.34	0.1656	0.0291		18.5078	1.65435	0.582
16806	36.48	0.1668	0.0296		18.5791	1.66633	0.592
16906	36.66	0.1676	0.0298		18.6708	1.67433	0.596
17006	36.78	0.1687	0.0304		18.7319	1.68531	0.608
17106	37.02	0.1697	0.0307		18.8541	1.6953	0.614
17206	37.16	0.1707	0.0312		18.9254	1.70529	0.624
17306	37.3	0.1718	0.0318		18.9967	1.71628	0.636
17406	37.5	0.1728	0.0316		19.0986	1.72627	0.632
17506	37.62	0.1739	0.0316		19.1597	1.73726	0.632
17606	37.8	0.1748	0.0321		19.2514	1.74625	0.642
17706	37.86	0.1759	0.0331		19.2819	1.75724	0.662
17806	38	0.1768	0.0333		19.3532	1.76623	0.666
17906	38.26	0.1778	0.0335		19.4857	1.77622	0.67
18006	38.4	0.1788	0.0346		19.557	1.78621	0.692
18106	38.58	0.1798	0.0352		19.6486	1.7962	0.704
18206	38.78	0.1807	0.0354		19.7505	1.80519	0.708
18306	38.94	0.1818	0.0362		19.832	1.81618	0.724
18406	39.14	0.1828	0.0365		19.9338	1.82617	0.73
18506	39.28	0.1838	0.0365		20.0051	1.83616	0.73
18606	39.34	0.1848	0.037		20.0357	1.84615	0.74
18706	39.56	0.1858	0.0376		20.1477	1.85614	0.752
18806	39.68	0.1868	0.0387		20.2089	1.86613	0.774
18906	39.84	0.1877	0.0391		20.2903	1.87512	0.782
19006	40	0.1885	0.0388		20.3718	1.88312	0.776
19106	40.22	0.1896	0.0383		20.4839	1.89411	0.766
19206	40.26	0.1907	0.0399		20.5042	1.90509	0.798
19306	40.48	0.1916	0.0408		20.6163	1.91409	0.816
19406	40.56	0.1926	0.0409		20.657	1.92408	0.818
19506	40.7	0.1937	0.0413		20.7283	1.93506	0.826
19606	40.94	0.1947	0.0425		20.8506	1.94505	0.85
19706	41.1	0.1957	0.0413		20.9321	1.95504	0.826
19806	41.26	0.1968	0.0417		21.0135	1.96603	0.834
19906	41.42	0.1978	0.0425		21.095	1.97602	0.85
20006	41.6	0.199	0.0438		21.1867	1.98801	0.876
20106	41.76	0.2	0.0449		21.2682	1.998	0.898
20206	41.8	0.201	0.0446		21.2886	2.00799	0.892
20306	42.08	0.2019	0.0451		21.4312	2.01698	0.902
20406	42.24	0.203	0.0453		21.5127	2.02797	0.906
20506	42.44	0.204	0.0462		21.6145	2.03796	0.924
20606	42.5	0.205	0.0466		21.6451	2.04795	0.932
20706	42.64	0.206	0.0467		21.7164	2.05794	0.934
20806	42.84	0.2069	0.0471		21.8182	2.06693	0.942
20906	42.96	0.208	0.0475		21.8793	2.07792	0.95
21006	43.02	0.2091	0.048		21.9099	2.08891	0.96
21106	43.16	0.2101	0.0485		21.9812	2.0989	0.97
21206	43.32	0.211	0.0495		22.0627	2.10789	0.99
21306	43.52	0.212	0.05		22.1646	2.11788	1
21406	43.6	0.213	0.0506		22.2053	2.12787	1.012
21506	43.68	0.2141	0.0514		22.246	2.13886	1.028
21606	43.86	0.2149	0.0522		22.3377	2.14685	1.044
21706	43.96	0.2159	0.0526		22.3886	2.15684	1.052
21806	44.1	0.2168	0.0525		22.4599	2.16583	1.05
21906	44.34	0.2178	0.0523		22.5822	2.17582	1.046
22006	44.4	0.2188	0.0528		22.6127	2.18581	1.056
22106	44.62	0.2197	0.0532		22.7248	2.19481	1.064
22206	44.68	0.2208	0.0543		22.7553	2.20579	1.086
22306	44.88	0.2217	0.0549		22.8572	2.21479	1.098
22406	44.94	0.2229	0.0556		22.8878	2.22677	1.112
22506	45.1	0.2237	0.0565		22.9692	2.23477	1.13
22606	45.22	0.2248	0.0573		23.0304	2.24575	1.146
22706	45.42	0.2256	0.0576		23.1322	2.25375	1.152
22806	45.44	0.2266	0.0583		23.1424	2.26374	1.166
22906	45.64	0.2275	0.0589		23.2443	2.27273	1.178
23006	45.88	0.2288	0.0593		23.3665	2.28571	1.186
23106	46.1	0.2298	0.0595		23.4785	2.2957	1.19
23206	46.22	0.2308	0.0604		23.5397	2.30569	1.208
23306	46.36	0.2319	0.0603		23.611	2.31668	1.206
23406	46.4	0.233	0.0612		23.6313	2.32767	1.224
23506	46.7	0.234	0.0612		23.7841	2.33766	1.224
23606	46.82	0.2351	0.0618		23.8452	2.34865	1.236
23706	47.04	0.2361	0.0631		23.9573	2.35864	1.262
23806	47.12	0.2371	0.0625		23.998	2.36863	1.25
23906	47.2	0.2381	0.0637		24.0388	2.37862	1.274
24006	47.42	0.2392	0.0649		24.1508	2.38961	1.298
24106	47.48	0.2402	0.0649		24.1814	2.3996	1.298
24206	47.64	0.2411	0.0662		24.2629	2.40859	1.324
24306	47.68	0.2422	0.0668		24.2832	2.41958	1.336
24406	47.82	0.2433	0.0672		24.3545	2.43057	1.344
24506	47.88	0.2442	0.0678		24.3851	2.43956	1.356
24606	48.06	0.2453	0.0682		24.4768	2.45055	1.364
24706	48.14	0.2462	0.068		24.5175	2.45954	1.36
24806	48.28	0.2473	0.0686		24.5888	2.47053	1.372
24906	48.4	0.2482	0.0696		24.6499	2.47952	1.392
25006	48.56	0.2493	0.07		24.7314	2.49051	1.4
25106	48.64	0.2502	0.0708		24.7721	2.4995	1.416
25206	48.72	0.2512	0.0719		24.8129	2.50949	1.438
25306	48.98	0.2521	0.0724		24.9453	2.51848	1.448
25406	49.08	0.2531	0.073		24.9962	2.52847	1.46
25506	49.12	0.254	0.0735		25.0166	2.53746	1.47
25606	49.28	0.255	0.0742		25.0981	2.54745	1.484
25706	49.42	0.2559	0.0745		25.1694	2.55644	1.49
25806	49.54	0.2569	0.0753		25.2305	2.56643	1.506
25906	49.6	0.2578	0.0758		25.2611	2.57542	1.516
26006	49.74	0.2587	0.0761		25.3324	2.58442	1.522
26106	49.84	0.2598	0.0768		25.3833	2.5954	1.536
26206	49.94	0.2608	0.0773		25.4342	2.60539	1.546
26306	50.08	0.2617	0.078		25.5055	2.61439	1.56
26406	50.16	0.2626	0.0785		25.5463	2.62338	1.57
26506	50.28	0.2636	0.0791		25.6074	2.63337	1.582
26606	50.4	0.2647	0.0795		25.6685	2.64436	1.59
26706	50.58	0.2658	0.0797		25.7602	2.65534	1.594
26806	50.68	0.2667	0.0807		25.8111	2.66434	1.614
26906	50.92	0.2678	0.0814		25.9333	2.67532	1.628
27006	51.1	0.2687	0.0819		26.025	2.68432	1.638
27106	51.16	0.2699	0.0823		26.0556	2.6963	1.646
27206	51.24	0.271	0.0824		26.0963	2.70729	1.648
27306	51.48	0.272	0.0836		26.2185	2.71728	1.672
27406	51.58	0.273	0.084		26.2695	2.72727	1.68
27506	51.58	0.2741	0.0837		26.2695	2.73826	1.674
27606	51.8	0.2751	0.085		26.3815	2.74825	1.7
27706	51.84	0.2763	0.0858		26.4019	2.76024	1.716
27806	51.98	0.2772	0.0864		26.4732	2.76923	1.728
27906	52.2	0.2784	0.0871		26.5852	2.78122	1.742
28006	52.24	0.2793	0.0857		26.6056	2.79021	1.714
28106	52.14	0.2804	0.0881		26.5547	2.8012	1.762
28206	52.4	0.2814	0.0886		26.6871	2.81119	1.772
28306	52.56	0.2823	0.0889		26.7686	2.82018	1.778
28406	52.54	0.2835	0.0896		26.7584	2.83217	1.792
28506	52.72	0.2845	0.0883		26.8501	2.84216	1.766
28606	52.74	0.2855	0.09		26.8603	2.85215	1.8
28706	52.96	0.2866	0.0896		26.9723	2.86314	1.792
28806	53	0.2876	0.0904		26.9927	2.87313	1.808
28906	53.04	0.2885	0.0915		27.0131	2.88212	1.83
29006	53.12	0.2894	0.0915		27.0538	2.89111	1.83
29106	53.2	0.2903	0.0919		27.0945	2.9001	1.838
29206	53.34	0.2912	0.0922		27.1658	2.90909	1.844
29306	53.42	0.2922	0.0926		27.2066	2.91908	1.852
29406	53.58	0.2932	0.0934		27.2881	2.92907	1.868
29506	53.62	0.2941	0.0936		27.3084	2.93806	1.872
29606	53.74	0.2951	0.0941		27.3696	2.94805	1.882
29706	53.88	0.2961	0.0947		27.4409	2.95804	1.894
29806	53.96	0.297	0.0952		27.4816	2.96703	1.904
29906	54.1	0.2979	0.0959		27.5529	2.97602	1.918
30006	54.16	0.2989	0.0964		27.5835	2.98601	1.928
30106	54.28	0.2999	0.0971		27.6446	2.996	1.942
30206	54.38	0.3008	0.0978		27.6955	3.005	1.956
30306	54.38	0.3018	0.0985		27.6955	3.01499	1.97
30406	54.5	0.3028	0.0998		27.7566	3.02498	1.996
30506	54.66	0.3037	0.1004		27.8381	3.03397	2.008
30606	54.76	0.3048	0.1009		27.889	3.04496	2.018
30706	54.86	0.3059	0.1031		27.94	3.05594	2.062
30806	54.98	0.3067	0.1039		28.0011	3.06394	2.078
30906	54.96	0.3078	0.1046		27.9909	3.07493	2.092
31006	55.16	0.3088	0.1051		28.0928	3.08492	2.102
31106	55.12	0.3098	0.1059		28.0724	3.09491	2.118
31206	55.3	0.3107	0.1051		28.1641	3.1039	2.102
31306	55.28	0.3116	0.1059		28.1539	3.11289	2.118
31406	55.4	0.3128	0.1069		28.215	3.12488	2.138
31506	55.52	0.3137	0.1081		28.2761	3.13387	2.162
31606	55.68	0.3145	0.1082		28.3576	3.14186	2.164
31706	55.72	0.3155	0.1092		28.378	3.15185	2.184
31806	55.8	0.3166	0.1097		28.4187	3.16284	2.194
31906	55.96	0.3176	0.1105		28.5002	3.17283	2.21
32006	55.92	0.3187	0.1117		28.4798	3.18382	2.234
32106	56.1	0.3198	0.112		28.5715	3.19481	2.24
32206	56.22	0.3208	0.1129		28.6326	3.2048	2.258
32306	56.3	0.3217	0.1135		28.6734	3.21379	2.27
32406	56.36	0.3228	0.1146		28.7039	3.22478	2.292
32506	56.42	0.3238	0.1153		28.7345	3.23477	2.306
32606	56.56	0.3248	0.1162		28.8058	3.24476	2.324
32706	56.58	0.3258	0.1166		28.816	3.25475	2.332
32806	56.7	0.3269	0.1176		28.8771	3.26573	2.352
32906	56.76	0.3278	0.1185		28.9076	3.27473	2.37
33006	56.72	0.3288	0.1197		28.8873	3.28472	2.394
33106	56.92	0.3298	0.1205		28.9891	3.29471	2.41
33206	56.96	0.3307	0.1214		29.0095	3.3037	2.428
33306	56.98	0.3317	0.1224		29.0197	3.31369	2.448
33406	57.12	0.3328	0.1237		29.091	3.32468	2.474
33506	57.2	0.3338	0.1245		29.1317	3.33467	2.49
33606	57.24	0.3348	0.1254		29.1521	3.34466	2.508
33706	57.32	0.3359	0.1272		29.1928	3.35564	2.544
33806	57.38	0.3368	0.1282		29.2234	3.36464	2.564
33906	57.48	0.3378	0.1295		29.2743	3.37463	2.59
34006	57.62	0.3387	0.1305		29.3456	3.38362	2.61
34106	57.56	0.3398	0.131		29.3151	3.39461	2.62
34206	57.62	0.3408	0.1324		29.3456	3.4046	2.648
34306	57.76	0.3417	0.1335		29.4169	3.41359	2.67
34406	57.88	0.3427	0.1345		29.478	3.42358	2.69
34506	57.98	0.3438	0.1354		29.529	3.43457	2.708
34606	58	0.345	0.1364		29.5392	3.44655	2.728
34706	58.06	0.3461	0.1373		29.5697	3.45754	2.746
34806	58.2	0.347	0.1383		29.641	3.46653	2.766
34906	58.2	0.3481	0.1394		29.641	3.47752	2.788
35006	58.22	0.3492	0.1405		29.6512	3.48851	2.81
35106	58.32	0.3502	0.1414		29.7021	3.4985	2.828
35206	58.34	0.3512	0.1426		29.7123	3.50849	2.852
35306	58.42	0.3523	0.1437		29.7531	3.51948	2.874
35406	58.38	0.3533	0.1448		29.7327	3.52947	2.896
35506	58.42	0.3543	0.1458		29.7531	3.53946	2.916
35606	58.48	0.3553	0.1467		29.7836	3.54945	2.934
35706	58.56	0.3564	0.1476		29.8244	3.56044	2.952
35806	58.68	0.3574	0.1485		29.8855	3.57043	2.97
35906	58.68	0.3584	0.1489		29.8855	3.58042	2.978
36006	58.72	0.3594	0.1501		29.9059	3.59041	3.002
36106	58.72	0.3604	0.1514		29.9059	3.6004	3.028
36206	58.84	0.3612	0.1523		29.967	3.60839	3.046
36306	58.9	0.3622	0.1534		29.9975	3.61838	3.068
36406	58.86	0.3631	0.155		29.9772	3.62737	3.1
36506	58.96	0.364	0.1561		30.0281	3.63636	3.122
36606	58.96	0.365	0.1569		30.0281	3.64635	3.138
36706	59.04	0.366	0.1577		30.0688	3.65634	3.154
36806	58.94	0.3668	0.1578		30.0179	3.66434	3.156
36906	59.08	0.3678	0.1595		30.0892	3.67433	3.19
37006	59.12	0.3688	0.1598		30.1096	3.68432	3.196
37106	59.16	0.3692	0.1602		30.1299	3.68831	3.204
37206	59.3	0.3707	0.1616		30.2012	3.7033	3.232
37306	59.2	0.3725	0.1646		30.1503	3.72128	3.292
37406	58.64	0.3733	0.1705		29.8651	3.72927	3.41
37506	58.2	0.3744	0.1756		29.641	3.74026	3.512
37606	17.36	0.3815	0.1931		8.84138	3.81119	3.862
37610	0	0.4267	0.2558		0	4.26274	5.116
