# Supplementary material for: Physical and Mechanical Properties of Gypsum‐Like Rock Materials
Source: Hindawi journal article supplement (doi:10.1155/2020/3703706), 2020-01-01
Supplement: f1 [file 3703706.f1.zip › 3703706.f1/Saturated triaxial compression test data.xlsx]

## Sheet: A-7-3B
Time: 18:55:02,07/04/2019
diameter: 49.2	mm	height: 99.8	mm
Vertical 100kN force sensor (vertical force of test piece)
Control mode: force / confining pressure	waveform: slope
KN/s	Force end point: 5.920	KN	confining pressure rate: 0.500	MPa/s	confining pressure end point: 2.9910	MPa
time (ms)	vertical force (KN)	vertical deformation (mm)	confining pressure (MPa)		Stress (MPa)	axial strain	transverse strain
0	0	0	0		0	0	0
200	0	-0.0009	0		0	-0.00901804	0
400	0.02	-0.00101	0		0.0105199	-0.0101202	0
600	0.36	-0.00103	0.007		0.189357	-0.0103206	0.142276
800	0.38	-0.00103	0.015		0.199877	-0.0103206	0.304878
1000	0.58	-0.001	0.024		0.305076	-0.01002	0.487805
1200	0.7	-0.00054	0.036		0.368195	-0.00541082	0.731707
1400	0.96	0.00036	0.056		0.504953	0.00360721	1.13821
1600	1.22	0.00167	0.079		0.641711	0.0167335	1.60569
1800	1.42	0.0017	0.111		0.74691	0.0170341	2.2561
2000	1.66	0.00132	0.161		0.873148	0.0132265	3.27236
2200	1.74	-1e-05	0.214		0.915228	-0.0001002	4.34959
2400	1.96	-0.00169	0.259		1.03095	-0.0169339	5.26423
2600	2.24	-0.00258	0.303		1.17822	-0.0258517	6.15854
2800	2.36	-0.00293	0.345		1.24134	-0.0293587	7.0122
3000	2.52	-0.00298	0.382		1.3255	-0.0298597	7.76423
3200	2.78	-0.00297	0.406		1.46226	-0.0297595	8.25203
3400	2.96	-0.00294	0.433		1.55694	-0.0294589	8.80081
3600	3.14	-0.0027	0.457		1.65162	-0.0270541	9.28862
3800	3.44	-0.001	0.483		1.80942	-0.01002	9.81707
4000	3.66	0.00172	0.514		1.92513	0.0172345	10.4472
4200	3.78	0.00488	0.553		1.98825	0.0488978	11.2398
4400	4.08	0.00857	0.609		2.14605	0.0858717	12.378
4600	4.4	0.01266	0.721		2.31437	0.126854	14.6545
4800	4.66	0.01677	0.933		2.45113	0.168036	18.9634
5000	4.82	0.01811	1.416		2.53529	0.181463	28.7805
5200	4.7	0.01826	2.091		2.47217	0.182966	42.5
5400	5.12	0.01801	2.366		2.69308	0.180461	48.0894
5600	5.2	0.01798	2.548		2.73516	0.18016	51.7886
5800	5.42	0.0185	2.891		2.85088	0.185371	58.7602
6000	5.6	0.02144	2.982		2.94556	0.21483	60.6098
6200	5.74	0.02449	3.01		3.0192	0.245391	61.1789
6400	5.92	0.02813	2.991		3.11388	0.281864	60.7927
6445	5.96	0.02891	2.994		3.13492	0.289679	60.8537
6545	6.06	0.03088	2.975		3.18752	0.309419	60.4675
6645	6.12	0.03296	2.981		3.21908	0.330261	60.5894
6746	6.22	0.03522	2.997		3.27168	0.352906	60.9146
6750	6.28	0.0353	2.998		3.30324	0.353707	60.935
6951	6.28	0.0353	2.998		3.30324	0.353707	60.935
7151	5.78	0.03598	3.001		3.04024	0.360521	60.9959
7351	3.52	0.03967	2.999		1.8515	0.397495	60.9553
7551	3.62	0.04123	3		1.90409	0.413126	60.9756
7753	3.58	0.04215	3		1.88305	0.422345	60.9756
7953	3.62	0.04283	2.997		1.90409	0.429158	60.9146
8153	3.72	0.0441	3		1.95669	0.441884	60.9756
8353	4.06	0.04528	3.001		2.13553	0.453707	60.9959
8553	4.62	0.04588	2.997		2.43009	0.459719	60.9146
8753	6.66	0.04607	3.001		3.50311	0.461623	60.9959
8953	6.78	0.04523	3.003		3.56623	0.453206	61.0366
9153	6.48	0.04493	3.004		3.40843	0.4502	61.0569
9353	6.44	0.04575	2.999		3.38739	0.458417	60.9553
9553	5.96	0.04731	3		3.13492	0.474048	60.9756
9753	5.96	0.04731	3		3.13492	0.474048	60.9756
9953	5.96	0.04731	3		3.13492	0.474048	60.9756
10153	5.96	0.04731	3		3.13492	0.474048	60.9756
10353	3.98	0.05261	2.998		2.09345	0.527154	60.935
10553	4.28	0.0556	2.998		2.25125	0.557114	60.935
10753	6.1	0.05617	3.001		3.20856	0.562826	60.9959
10953	6.1	0.05617	3.001		3.20856	0.562826	60.9959
11153	4.48	0.05633	3		2.35645	0.564429	60.9756
11353	4.56	0.0592	3.004		2.39853	0.593186	61.0569
11553	4.56	0.0592	3.004		2.39853	0.593186	61.0569
11753	4.5	0.06093	2.998		2.36697	0.610521	60.935
11953	4.5	0.06093	2.998		2.36697	0.610521	60.935
12153	4.52	0.06322	3		2.37749	0.633467	60.9756
12353	7.08	0.06392	3.001		3.72403	0.640481	60.9959
12553	7.32	0.06214	3		3.85027	0.622645	60.9756
12753	7.32	0.06214	3		3.85027	0.622645	60.9756
12953	7.32	0.06214	3		3.85027	0.622645	60.9756
13153	7.56	0.06555	2.999		3.97651	0.656814	60.9553
13353	5.52	0.06687	3.002		2.90348	0.67004	61.0163
13553	5.52	0.06687	3.002		2.90348	0.67004	61.0163
13753	5.52	0.06687	3.002		2.90348	0.67004	61.0163
13953	5.7	0.07031	3.002		2.99816	0.704509	61.0163
14153	5.92	0.07313	3.001		3.11388	0.732766	60.9959
14353	5.92	0.07313	3.001		3.11388	0.732766	60.9959
14553	5.48	0.07518	3		2.88244	0.753307	60.9756
14753	5.48	0.07518	3		2.88244	0.753307	60.9756
14953	5.24	0.07477	2.999		2.7562	0.749198	60.9553
15153	5.06	0.07823	2.999		2.66152	0.783868	60.9553
15353	5.06	0.07823	2.999		2.66152	0.783868	60.9553
15553	5.06	0.07823	2.999		2.66152	0.783868	60.9553
15753	6.04	0.08099	2.999		3.177	0.811523	60.9553
15953	6.04	0.08099	2.999		3.177	0.811523	60.9553
16153	6.04	0.08099	2.999		3.177	0.811523	60.9553
16353	6.04	0.08099	2.999		3.177	0.811523	60.9553
16553	6.04	0.08099	2.999		3.177	0.811523	60.9553
16753	6.04	0.08099	2.999		3.177	0.811523	60.9553
16953	6.04	0.08099	2.999		3.177	0.811523	60.9553
17153	6.14	0.08815	2.999		3.2296	0.883267	60.9553
17353	6.14	0.08815	2.999		3.2296	0.883267	60.9553
17553	5.74	0.08919	2.999		3.0192	0.893687	60.9553
17753	5.74	0.08919	2.999		3.0192	0.893687	60.9553
17953	5.88	0.08974	3		3.09284	0.899198	60.9756
18153	6.44	0.09265	2.999		3.38739	0.928357	60.9553
18353	6.44	0.09265	2.999		3.38739	0.928357	60.9553
18553	6.44	0.09265	2.999		3.38739	0.928357	60.9553
18753	6.44	0.09265	2.999		3.38739	0.928357	60.9553
18953	6.44	0.09265	2.999		3.38739	0.928357	60.9553
19153	6.44	0.09265	2.999		3.38739	0.928357	60.9553
19353	6.58	0.0973	3.001		3.46103	0.97495	60.9959
19553	8.82	0.09921	3.004		4.63926	0.994088	61.0569
19753	8.54	0.09771	3.001		4.49198	0.979058	60.9959
19953	8.54	0.09771	3.001		4.49198	0.979058	60.9959
20153	8.54	0.09771	3.001		4.49198	0.979058	60.9959
20353	8.54	0.09771	3.001		4.49198	0.979058	60.9959
20553	7.64	0.10433	3.001		4.01859	1.04539	60.9959
20753	7.36	0.10372	2.999		3.87131	1.03928	60.9553
20953	7.36	0.10372	2.999		3.87131	1.03928	60.9553
21153	9.38	0.10692	3		4.93381	1.07134	60.9756
21353	9.02	0.10514	2.999		4.74446	1.05351	60.9553
21553	9.02	0.10514	2.999		4.74446	1.05351	60.9553
21753	9.02	0.10514	2.999		4.74446	1.05351	60.9553
21953	7.42	0.1089	2.998		3.90287	1.09118	60.935
22153	7.42	0.1089	2.998		3.90287	1.09118	60.935
22353	7.42	0.1089	2.998		3.90287	1.09118	60.935
22553	6.92	0.11428	3		3.63987	1.14509	60.9756
22753	6.92	0.11428	3		3.63987	1.14509	60.9756
22953	6.78	0.11633	2.998		3.56623	1.16563	60.935
23153	6.78	0.11633	2.998		3.56623	1.16563	60.935
23353	6.6	0.11869	2.997		3.47155	1.18928	60.9146
23553	8.32	0.11949	3		4.37626	1.19729	60.9756
23753	8.32	0.11949	3		4.37626	1.19729	60.9756
23953	8.32	0.11949	3		4.37626	1.19729	60.9756
24153	8.32	0.11949	3		4.37626	1.19729	60.9756
24353	7.56	0.12115	2.998		3.97651	1.21393	60.935
24553	7.7	0.12431	2.997		4.05015	1.24559	60.9146
24753	7.7	0.12431	2.997		4.05015	1.24559	60.9146
24953	7.34	0.12643	3.002		3.86079	1.26683	61.0163
25153	7.34	0.12643	3.002		3.86079	1.26683	61.0163
25353	7.08	0.12722	2.998		3.72403	1.27475	60.935
25553	7.08	0.12722	2.998		3.72403	1.27475	60.935
25753	7.4	0.12881	2.999		3.89235	1.29068	60.9553
25953	7.4	0.12881	2.999		3.89235	1.29068	60.9553
26153	7.4	0.12881	2.999		3.89235	1.29068	60.9553
26353	7.92	0.13333	3.002		4.16586	1.33597	61.0163
26553	7.92	0.13333	3.002		4.16586	1.33597	61.0163
26753	7.92	0.13333	3.002		4.16586	1.33597	61.0163
26953	7.92	0.13333	3.002		4.16586	1.33597	61.0163
27153	7.92	0.13333	3.002		4.16586	1.33597	61.0163
27353	7.92	0.13333	3.002		4.16586	1.33597	61.0163
27553	8.62	0.13718	3.001		4.53406	1.37455	60.9959
27753	8.62	0.13718	3.001		4.53406	1.37455	60.9959
27953	8.92	0.13908	3.003		4.69186	1.39359	61.0366
28153	8.82	0.14231	3.002		4.63926	1.42595	61.0163
28353	8.82	0.14231	3.002		4.63926	1.42595	61.0163
28553	8.82	0.14231	3.002		4.63926	1.42595	61.0163
28753	8.82	0.14231	3.002		4.63926	1.42595	61.0163
28953	8.82	0.14231	3.002		4.63926	1.42595	61.0163
29153	8.82	0.14231	3.002		4.63926	1.42595	61.0163
29353	8.8	0.14592	3.002		4.62874	1.46212	61.0163
29553	9.1	0.14902	3		4.78654	1.49319	60.9756
29753	9.1	0.14902	3		4.78654	1.49319	60.9756
29953	9.1	0.14902	3		4.78654	1.49319	60.9756
30153	9.1	0.14902	3		4.78654	1.49319	60.9756
30353	9.1	0.14902	3		4.78654	1.49319	60.9756
30553	9.1	0.14902	3		4.78654	1.49319	60.9756
30753	8.94	0.15317	3.003		4.70238	1.53477	61.0366
30953	10.74	0.15564	3.001		5.64916	1.55952	60.9959
31153	10.74	0.15564	3.001		5.64916	1.55952	60.9959
31353	9.02	0.15514	2.999		4.74446	1.55451	60.9553
31553	8.78	0.15893	2.999		4.61822	1.59248	60.9553
31753	8.78	0.15893	2.999		4.61822	1.59248	60.9553
31953	8.78	0.15893	2.999		4.61822	1.59248	60.9553
32153	9.24	0.16177	2.997		4.86017	1.62094	60.9146
32353	9.24	0.16177	2.997		4.86017	1.62094	60.9146
32553	9.24	0.16177	2.997		4.86017	1.62094	60.9146
32753	10.14	0.16495	3.001		5.33357	1.65281	60.9959
32953	10.14	0.16495	3.001		5.33357	1.65281	60.9959
33153	10.14	0.16495	3.001		5.33357	1.65281	60.9959
33353	10.88	0.16739	3.001		5.7228	1.67725	60.9959
33553	11.22	0.16607	2.999		5.90164	1.66403	60.9553
33753	11.22	0.16607	2.999		5.90164	1.66403	60.9553
33953	11.22	0.16607	2.999		5.90164	1.66403	60.9553
34155	11.22	0.16607	2.999		5.90164	1.66403	60.9553
34355	11.22	0.16607	2.999		5.90164	1.66403	60.9553
34555	11.22	0.16607	2.999		5.90164	1.66403	60.9553
34755	11.6	0.17404	3.001		6.10152	1.74389	60.9959
34955	11.6	0.17404	3.001		6.10152	1.74389	60.9959
35155	11.44	0.1762	2.999		6.01736	1.76553	60.9553
35355	10.92	0.17548	3		5.74384	1.75832	60.9756
35555	11.12	0.17851	3.003		5.84904	1.78868	61.0366
35755	11.12	0.17851	3.003		5.84904	1.78868	61.0366
35955	11.12	0.17851	3.003		5.84904	1.78868	61.0366
36155	11.12	0.17851	3.003		5.84904	1.78868	61.0366
36355	11.12	0.17851	3.003		5.84904	1.78868	61.0366
36555	11.12	0.17851	3.003		5.84904	1.78868	61.0366
36755	11.12	0.17851	3.003		5.84904	1.78868	61.0366
36955	11.12	0.17851	3.003		5.84904	1.78868	61.0366
37155	10.96	0.18426	2.996		5.76488	1.84629	60.8943
37355	10.96	0.18426	2.996		5.76488	1.84629	60.8943
37555	11.26	0.18626	2.997		5.92268	1.86633	60.9146
37755	11.74	0.18919	3.002		6.17516	1.89569	61.0163
37955	11.74	0.18919	3.002		6.17516	1.89569	61.0163
38155	11.74	0.18919	3.002		6.17516	1.89569	61.0163
38355	11.74	0.18919	3.002		6.17516	1.89569	61.0163
38555	11.74	0.18919	3.002		6.17516	1.89569	61.0163
38755	11.74	0.18919	3.002		6.17516	1.89569	61.0163
38955	11.74	0.18919	3.002		6.17516	1.89569	61.0163
39155	11.74	0.18919	3.002		6.17516	1.89569	61.0163
39355	11.74	0.18919	3.002		6.17516	1.89569	61.0163
39555	13.52	0.19767	3.001		7.11142	1.98066	60.9959
39755	13.12	0.19591	2.999		6.90103	1.96303	60.9553
39955	13.12	0.19591	2.999		6.90103	1.96303	60.9553
40155	13.12	0.19591	2.999		6.90103	1.96303	60.9553
40355	13.12	0.19591	2.999		6.90103	1.96303	60.9553
40555	13.12	0.19591	2.999		6.90103	1.96303	60.9553
40755	13.12	0.19591	2.999		6.90103	1.96303	60.9553
40955	13.12	0.19591	2.999		6.90103	1.96303	60.9553
41155	13.12	0.19591	2.999		6.90103	1.96303	60.9553
41355	13.12	0.19591	2.999		6.90103	1.96303	60.9553
41555	13.12	0.19591	2.999		6.90103	1.96303	60.9553
41755	13.12	0.19591	2.999		6.90103	1.96303	60.9553
41955	13.12	0.19591	2.999		6.90103	1.96303	60.9553
42155	13.12	0.19591	2.999		6.90103	1.96303	60.9553
42355	13.12	0.19591	2.999		6.90103	1.96303	60.9553
42555	13.12	0.19591	2.999		6.90103	1.96303	60.9553
42755	13.12	0.19591	2.999		6.90103	1.96303	60.9553
42955	13.12	0.19591	2.999		6.90103	1.96303	60.9553
43155	13.12	0.19591	2.999		6.90103	1.96303	60.9553
43355	13.12	0.19591	2.999		6.90103	1.96303	60.9553
43555	13.12	0.19591	2.999		6.90103	1.96303	60.9553
43755	13.12	0.19591	2.999		6.90103	1.96303	60.9553
43955	13.12	0.19591	2.999		6.90103	1.96303	60.9553
44155	13.12	0.19591	2.999		6.90103	1.96303	60.9553
44355	13.5	0.21918	2.998		7.1009	2.19619	60.935
44555	13.42	0.2224	3.001		7.05883	2.22846	60.9959
44755	13.2	0.22168	2.998		6.94311	2.22124	60.935
44955	13.2	0.22168	2.998		6.94311	2.22124	60.935
45155	13.2	0.22168	2.998		6.94311	2.22124	60.935
45355	13.2	0.22168	2.998		6.94311	2.22124	60.935
45555	13.2	0.22168	2.998		6.94311	2.22124	60.935
45755	12.72	0.22865	3.001		6.69063	2.29108	60.9959
45955	12.72	0.22865	3.001		6.69063	2.29108	60.9959
46155	12.72	0.22995	3		6.69063	2.30411	60.9756
46355	12.72	0.22995	3		6.69063	2.30411	60.9756
46555	12.84	0.23301	2.997		6.75375	2.33477	60.9146
46755	12.84	0.23301	2.997		6.75375	2.33477	60.9146
46955	12.72	0.23365	3.001		6.69063	2.34118	60.9959
47155	12.72	0.23365	3.001		6.69063	2.34118	60.9959
47355	12.48	0.23603	3.001		6.56439	2.36503	60.9959
47555	12.48	0.23603	3.001		6.56439	2.36503	60.9959
47755	12.78	0.23813	2.998		6.72219	2.38607	60.935
47955	12.78	0.23813	2.998		6.72219	2.38607	60.935
48155	12.56	0.2405	2.996		6.60647	2.40982	60.8943
48355	12.56	0.2405	2.996		6.60647	2.40982	60.8943
48555	13.18	0.24069	2.998		6.93259	2.41172	60.935
48755	13.18	0.24069	2.998		6.93259	2.41172	60.935
48955	12.88	0.24309	2.995		6.77479	2.43577	60.874
49155	12.88	0.24309	2.995		6.77479	2.43577	60.874
49355	13.28	0.24405	2.994		6.98519	2.44539	60.8537
49555	13.28	0.24405	2.994		6.98519	2.44539	60.8537
49755	14.14	0.24655	2.997		7.43754	2.47044	60.9146
49955	14.14	0.24655	2.997		7.43754	2.47044	60.9146
50155	14.14	0.24655	2.997		7.43754	2.47044	60.9146
50355	14.72	0.25045	2.997		7.74262	2.50952	60.9146
50555	14.72	0.25035	3		7.74262	2.50852	60.9756
50755	14.96	0.25316	2.999		7.86885	2.53667	60.9553
50955	14.96	0.25316	2.999		7.86885	2.53667	60.9553
51155	14.96	0.25316	2.999		7.86885	2.53667	60.9553
51355	14.96	0.25316	2.999		7.86885	2.53667	60.9553
51555	14.96	0.25316	2.999		7.86885	2.53667	60.9553
51755	14.96	0.25316	2.999		7.86885	2.53667	60.9553
51955	14.96	0.25316	2.999		7.86885	2.53667	60.9553
52155	14.96	0.25316	2.999		7.86885	2.53667	60.9553
52355	14.96	0.25316	2.999		7.86885	2.53667	60.9553
52555	14.96	0.25316	2.999		7.86885	2.53667	60.9553
52755	14.96	0.25316	2.999		7.86885	2.53667	60.9553
52955	14.96	0.25316	2.999		7.86885	2.53667	60.9553
53155	14.96	0.25316	2.999		7.86885	2.53667	60.9553
53355	15.8	0.26547	3.002		8.31069	2.66002	61.0163
53555	15.68	0.26471	2.999		8.24757	2.6524	60.9553
53755	17.14	0.2673	3.004		9.01552	2.67836	61.0569
53955	17.26	0.26316	2.998		9.07864	2.63687	60.935
54155	17.2	0.27068	3.002		9.04708	2.71222	61.0163
54355	17.2	0.27068	3.002		9.04708	2.71222	61.0163
54555	16.18	0.26904	3		8.51057	2.69579	60.9756
54755	16.6	0.27089	3.001		8.73148	2.71433	60.9959
54955	17.48	0.27178	2.998		9.19436	2.72325	60.935
55155	17.22	0.27297	2.998		9.0576	2.73517	60.935
55355	16.72	0.27395	2.998		8.7946	2.74499	60.935
55555	16.86	0.275	3.001		8.86824	2.75551	60.9959
55755	16.76	0.27623	2.997		8.81564	2.76784	60.9146
55955	17.32	0.27734	2.999		9.1102	2.77896	60.9553
56155	17.48	0.27828	3		9.19436	2.78838	60.9756
56355	17.74	0.27909	3.001		9.33111	2.79649	60.9959
56555	17.84	0.28016	3		9.38371	2.80721	60.9756
56755	18.2	0.28033	3.001		9.57307	2.80892	60.9959
56955	17.94	0.28132	2.999		9.43631	2.81884	60.9553
57155	17.54	0.28246	3.001		9.22592	2.83026	60.9959
57355	17.1	0.28362	2.999		8.99448	2.84188	60.9553
57555	17.1	0.28492	2.999		8.99448	2.85491	60.9553
57755	17.52	0.28597	3		9.2154	2.86543	60.9756
57955	18.14	0.28695	3		9.54151	2.87525	60.9756
58155	18.44	0.28715	3.003		9.69931	2.87725	61.0366
58355	18.24	0.28832	3		9.59411	2.88898	60.9756
58555	18.08	0.28937	3.002		9.50995	2.8995	61.0163
58755	17.56	0.29055	2.999		9.23644	2.91132	60.9553
58955	17.28	0.29195	2.998		9.08916	2.92535	60.935
59155	18.16	0.29324	2.999		9.55203	2.93828	60.9553
59355	18.74	0.29304	3.003		9.85711	2.93627	61.0366
59555	18.46	0.29414	2.999		9.70983	2.94729	60.9553
59755	17.94	0.29542	2.998		9.43631	2.96012	60.935
59955	17.58	0.29665	2.999		9.24696	2.97244	60.9553
60155	18.06	0.29778	2.999		9.49943	2.98377	60.9553
60355	18.64	0.29898	3.002		9.80451	2.99579	61.0163
60555	19.18	0.29879	3.003		10.0885	2.99389	61.0366
60755	18.76	0.29993	3.001		9.86763	3.00531	60.9959
60955	18.38	0.30117	3.001		9.66775	3.01774	60.9959
61155	18.04	0.30239	2.999		9.48891	3.02996	60.9553
61355	17.92	0.30393	2.999		9.42579	3.04539	60.9553
61555	19.4	0.30421	2.996		10.2043	3.0482	60.8943
61755	19.52	0.30477	3.002		10.2674	3.05381	61.0163
61955	18.84	0.30591	3.001		9.90971	3.06523	60.9959
62155	18.84	0.30591	3.001		9.90971	3.06523	60.9959
62355	18.56	0.3091	2.999		9.76243	3.09719	60.9553
62555	19.7	0.30861	3.004		10.3621	3.09228	61.0569
62755	19.3	0.30985	3.001		10.1517	3.10471	60.9959
62955	18.22	0.31122	2.999		9.58359	3.11844	60.9553
63155	18.42	0.31295	3		9.68879	3.13577	60.9756
63355	18.42	0.31295	3		9.68879	3.13577	60.9756
63555	19.28	0.31365	3.001		10.1411	3.14279	60.9959
63755	18.86	0.3152	2.997		9.92023	3.15832	60.9146
63955	18.4	0.31646	2.999		9.67827	3.17094	60.9553
64155	20.12	0.31686	3.004		10.583	3.17495	61.0569
64355	19.8	0.31747	2.998		10.4147	3.18106	60.935
64555	18.88	0.31899	2.995		9.93075	3.19629	60.874
64755	18.56	0.3206	2.999		9.76243	3.21242	60.9553
64955	20.38	0.32077	3.002		10.7197	3.21413	61.0163
65155	19.88	0.32144	3.001		10.4567	3.22084	60.9959
65355	19.88	0.32144	3.001		10.4567	3.22084	60.9959
65555	19.5	0.32418	2.996		10.2569	3.2483	60.8943
65755	19.54	0.32576	2.999		10.2779	3.26413	60.9553
65964	19.54	0.32576	2.999		10.2779	3.26413	60.9553
66165	19.64	0.32663	2.997		10.3305	3.27285	60.9146
66365	19.64	0.32663	2.997		10.3305	3.27285	60.9146
66565	20.22	0.32932	3		10.6356	3.2998	60.9756
66765	20.22	0.32932	3		10.6356	3.2998	60.9756
66965	19.92	0.33053	3.003		10.4778	3.31192	61.0366
67165	19.92	0.33053	3.003		10.4778	3.31192	61.0366
67365	20.78	0.33333	3.001		10.9301	3.33998	60.9959
67565	20.92	0.33318	2.996		11.0038	3.33848	60.8943
67765	20.18	0.33454	2.998		10.6145	3.3521	60.935
67965	20.18	0.33454	2.998		10.6145	3.3521	60.935
68165	20.74	0.33694	3.004		10.9091	3.37615	61.0569
68365	21.04	0.33814	2.999		11.0669	3.38818	60.9553
68565	21.2	0.33808	3		11.1511	3.38758	60.9756
68765	20.24	0.33942	3		10.6461	3.401	60.9756
68965	20.24	0.33942	3		10.6461	3.401	60.9756
69165	21.42	0.3416	2.998		11.2668	3.42285	60.935
69365	21.7	0.34211	3.002		11.414	3.42796	61.0163
69565	21.46	0.34299	3.002		11.2878	3.43677	61.0163
69765	21.14	0.3441	2.999		11.1195	3.4479	60.9553
69965	20.42	0.34555	3		10.7408	3.46242	60.9756
70165	20.6	0.34709	3		10.8355	3.47786	60.9756
70365	20.6	0.34709	3		10.8355	3.47786	60.9756
70565	21.28	0.34785	2.998		11.1931	3.48547	60.935
70765	21.04	0.34934	2.999		11.0669	3.5004	60.9553
70965	21.04	0.34934	2.999		11.0669	3.5004	60.9553
71165	21.88	0.35144	2.998		11.5087	3.52144	60.935
71365	21.72	0.3529	2.999		11.4246	3.53607	60.9553
71565	22.12	0.35276	3.002		11.635	3.53467	61.0163
71765	21.1	0.35412	3		11.0985	3.5483	60.9756
71965	21.1	0.35412	3		11.0985	3.5483	60.9756
72165	22.08	0.35657	3.001		11.6139	3.57285	60.9959
72365	22.28	0.3567	3		11.7191	3.57415	60.9756
72565	21.38	0.35812	3.001		11.2457	3.58838	60.9959
72765	21.08	0.35942	2.999		11.0879	3.6014	60.9553
72965	21.28	0.36115	3		11.1931	3.61874	60.9756
73165	22.54	0.36061	3		11.8559	3.61333	60.9756
73365	22.14	0.36165	2.999		11.6455	3.62375	60.9553
73565	21.14	0.3631	3.001		11.1195	3.63828	60.9959
73765	21.48	0.36448	3.005		11.2983	3.6521	61.0772
73965	22.2	0.36573	3		11.677	3.66463	60.9756
74165	22.68	0.36536	2.998		11.9295	3.66092	60.935
74365	21.76	0.36688	3		11.4456	3.67615	60.9756
74565	21.76	0.36688	3		11.4456	3.67615	60.9756
74765	22.46	0.36944	2.996		11.8138	3.7018	60.8943
74965	22.98	0.36976	2.998		12.0873	3.70501	60.935
75165	22.74	0.37054	3.003		11.9611	3.71283	61.0366
75365	21.86	0.37195	2.999		11.4982	3.72695	60.9553
75565	21.8	0.37327	2.999		11.4666	3.74018	60.9553
75765	22.98	0.37426	3.002		12.0873	3.7501	61.0163
75965	23.44	0.3744	3.001		12.3293	3.7515	60.9959
76165	22.92	0.37548	3.002		12.0558	3.76232	61.0163
76365	22.42	0.37665	3.002		11.7928	3.77405	61.0163
76565	22.04	0.37809	2.997		11.5929	3.78848	60.9146
76765	22.94	0.37917	3.002		12.0663	3.7993	61.0163
76965	23.64	0.37973	3.001		12.4345	3.80491	60.9959
77165	23.36	0.38022	3.002		12.2872	3.80982	61.0163
77365	22.76	0.38153	2.999		11.9716	3.82295	60.9553
77565	22.76	0.38153	2.999		11.9716	3.82295	60.9553
77765	23.18	0.38379	3		12.1925	3.84559	60.9756
77965	23.18	0.38379	3		12.1925	3.84559	60.9756
78165	23.34	0.38603	3.003		12.2767	3.86804	61.0366
78365	24.06	0.38618	3		12.6554	3.86954	60.9756
78565	23.72	0.3871	3		12.4766	3.87876	60.9756
78765	22.96	0.38846	2.999		12.0768	3.89238	60.9553
78965	22.54	0.38991	2.998		11.8559	3.90691	60.935
79165	23.44	0.3911	3.001		12.3293	3.91884	60.9959
79365	24.32	0.39099	2.999		12.7921	3.91774	60.9553
79565	23.98	0.39201	2.998		12.6133	3.92796	60.935
79765	23.62	0.39303	3.001		12.424	3.93818	60.9959
79965	24.46	0.39404	3.001		12.8658	3.9483	60.9959
80165	24.6	0.39509	3		12.9394	3.95882	60.9756
80365	24.68	0.39576	2.999		12.9815	3.96553	60.9553
80565	24.36	0.39697	3.002		12.8132	3.97766	61.0163
80765	23.78	0.39828	3.001		12.5081	3.99078	60.9959
80965	23.78	0.39828	3.001		12.5081	3.99078	60.9959
81165	24.3	0.4003	3		12.7816	4.01102	60.9756
81365	23.94	0.40132	3.001		12.5923	4.02124	60.9959
81565	23.74	0.40279	2.997		12.4871	4.03597	60.9146
81765	23.74	0.40279	2.997		12.4871	4.03597	60.9146
81965	24.78	0.40373	2.998		13.0341	4.04539	60.935
82165	24.78	0.40473	3.001		13.0341	4.05541	60.9959
82365	24.56	0.4059	2.998		12.9184	4.06713	60.935
82565	24.14	0.40715	3		12.6975	4.07966	60.9756
82765	23.72	0.4085	3		12.4766	4.09319	60.9756
82965	25.2	0.40938	2.998		13.255	4.102	60.935
83165	25.52	0.40987	3.003		13.4233	4.10691	61.0366
83365	25.38	0.41052	2.996		13.3497	4.11343	60.8943
83565	24.9	0.41179	2.998		13.0972	4.12615	60.935
83765	24.4	0.41306	3		12.8342	4.13888	60.9756
83965	24.34	0.41418	2.998		12.8027	4.1501	60.935
84165	24.58	0.4157	2.999		12.9289	4.16533	60.9553
84365	25.92	0.41543	3.001		13.6337	4.16263	60.9959
84565	25.5	0.41638	3.003		13.4128	4.17214	61.0366
84765	25.22	0.41767	2.998		13.2655	4.18507	60.935
84965	24.98	0.41886	2.999		13.1393	4.19699	60.9553
85165	24.72	0.42015	3.003		13.0025	4.20992	61.0366
85365	25.3	0.42125	3.003		13.3076	4.22094	61.0366
85565	26	0.4221	3		13.6758	4.22946	60.9756
85765	26.06	0.42228	2.998		13.7074	4.23126	60.935
85965	25.46	0.42359	3.003		13.3918	4.24439	61.0366
86165	24.88	0.42489	2.996		13.0867	4.25741	60.8943
86365	25.34	0.42583	3		13.3287	4.26683	60.9756
86565	25.18	0.42719	2.999		13.2445	4.28046	60.9553
86765	26.52	0.42722	2.999		13.9493	4.28076	60.9553
86965	26.14	0.42815	3.001		13.7495	4.29008	60.9959
87165	25.3	0.42955	3.002		13.3076	4.30411	61.0163
87365	24.96	0.43106	3		13.1288	4.31924	60.9756
87565	26.56	0.4317	3		13.9704	4.32565	60.9756
87765	26.46	0.43294	2.998		13.9178	4.33808	60.935
87965	26.82	0.43301	2.999		14.1071	4.33878	60.9553
88165	26.28	0.4342	3		13.8231	4.3507	60.9756
88365	25.9	0.43534	3		13.6232	4.36212	60.9756
88565	25.48	0.43678	3		13.4023	4.37655	60.9756
88765	26.18	0.43794	2.998		13.7705	4.38818	60.935
88965	26.48	0.43883	2.996		13.9283	4.39709	60.8943
89165	27.1	0.43892	3		14.2544	4.398	60.9756
89365	26.76	0.44003	2.999		14.0756	4.40912	60.9553
89565	26.58	0.4412	2.997		13.9809	4.42084	60.9146
89765	26.28	0.4423	2.999		13.8231	4.43186	60.9553
89965	25.88	0.44364	3.002		13.6127	4.44529	61.0163
90165	26.42	0.44485	2.998		13.8967	4.45741	60.935
90365	27.54	0.44526	3		14.4858	4.46152	60.9756
90565	27.3	0.44565	2.999		14.3596	4.46543	60.9553
90765	26.94	0.44707	3.002		14.1702	4.47966	61.0163
90965	26.26	0.44831	2.999		13.8126	4.49208	60.9553
91165	26.42	0.44965	2.997		13.8967	4.50551	60.9146
91365	27.64	0.45043	2.999		14.5384	4.51333	60.9553
91565	27.84	0.45076	3.001		14.6436	4.51663	60.9959
91765	27.84	0.45156	2.998		14.6436	4.52465	60.935
91965	26.88	0.45299	2.999		14.1387	4.53898	60.9553
92165	26.8	0.45422	2.998		14.0966	4.5513	60.935
92365	26.72	0.45535	2.998		14.0545	4.56263	60.935
92565	26.78	0.45673	2.998		14.0861	4.57645	60.935
92765	28.16	0.45674	2.998		14.812	4.57655	60.935
92965	28.02	0.45759	3		14.7383	4.58507	60.9756
93165	27.38	0.45882	2.999		14.4017	4.59739	60.9553
93365	26.98	0.46006	2.998		14.1913	4.60982	60.935
93565	26.8	0.46142	3.001		14.0966	4.62345	60.9959
93765	27.9	0.46234	2.997		14.6752	4.63267	60.9146
93965	28.38	0.46297	2.997		14.9277	4.63898	60.9146
94165	28.44	0.46345	3		14.9592	4.64379	60.9756
94365	28.34	0.46448	3.001		14.9066	4.65411	60.9959
94565	27.82	0.46546	2.999		14.6331	4.66393	60.9553
94765	27.38	0.46692	3		14.4017	4.67856	60.9756
94965	27.3	0.46815	2.999		14.3596	4.69088	60.9553
95165	27.7	0.46911	2.999		14.57	4.7005	60.9553
95365	28.12	0.47026	2.999		14.7909	4.71202	60.9553
95565	28.86	0.4707	2.999		15.1802	4.71643	60.9553
95765	28.9	0.47119	2.998		15.2012	4.72134	60.935
95965	28.42	0.47235	2.998		14.9487	4.73297	60.935
96165	28.08	0.47357	3		14.7699	4.74519	60.9756
96365	28.1	0.47467	2.999		14.7804	4.75621	60.9553
96565	28.02	0.47579	3		14.7383	4.76743	60.9756
96765	28	0.4768	2.997		14.7278	4.77756	60.9146
96965	28.1	0.47827	2.996		14.7804	4.79228	60.8943
97165	29.2	0.47888	3.001		15.359	4.7984	60.9959
97365	29.46	0.47929	2.998		15.4958	4.80251	60.935
97565	29.6	0.47994	3.005		15.5694	4.80902	61.0772
97765	29.22	0.48107	2.999		15.3695	4.82034	60.9553
97965	28.48	0.48243	2.998		14.9803	4.83397	60.935
98165	28.1	0.48377	2.998		14.7804	4.84739	60.935
98365	29	0.48465	2.997		15.2538	4.85621	60.9146
98565	28.94	0.48607	3		15.2222	4.87044	60.9756
98765	29.72	0.4858	3		15.6325	4.86774	60.9756
98965	29.44	0.487	3.001		15.4852	4.87976	60.9959
99165	28.7	0.48836	2.998		15.096	4.89339	60.935
99365	28.56	0.4896	2.998		15.0224	4.90581	60.935
99565	28.92	0.49078	3.002		15.2117	4.91764	61.0163
99765	28.92	0.49078	3.002		15.2117	4.91764	61.0163
99965	29.18	0.49279	3.003		15.3485	4.93778	61.0366
100165	30.1	0.49347	3		15.8324	4.94459	60.9756
100365	30.18	0.49364	3		15.8745	4.94629	60.9756
100565	29.68	0.49491	3.002		15.6115	4.95902	61.0163
100765	29.3	0.49614	2.999		15.4116	4.97134	60.9553
100965	29.28	0.49735	2.998		15.4011	4.98347	60.935
101165	29	0.49855	3		15.2538	4.99549	60.9756
101365	29.18	0.49989	2.998		15.3485	5.00892	60.935
101565	30.52	0.50012	3		16.0533	5.01122	60.9756
101765	30.18	0.50064	3		15.8745	5.01643	60.9756
101965	29.24	0.50217	2.998		15.38	5.03176	60.935
102165	29.32	0.50334	3.001		15.4221	5.04349	60.9959
102365	29.94	0.50462	3.003		15.7482	5.05631	61.0366
102565	30.8	0.50462	3.002		16.2006	5.05631	61.0163
102765	30.46	0.50554	2.998		16.0217	5.06553	60.935
102965	30.42	0.50665	3.001		16.0007	5.07665	60.9959
103165	29.96	0.50781	2.999		15.7587	5.08828	60.9553
103365	29.42	0.5091	2.998		15.4747	5.1012	60.935
103565	29.86	0.51025	3.001		15.7061	5.11273	60.9959
103765	30.12	0.51156	2.999		15.8429	5.12585	60.9553
103965	31.18	0.51159	3.002		16.4005	5.12615	61.0163
104165	31.06	0.51233	3		16.3373	5.13357	60.9756
104365	30.58	0.5135	2.999		16.0849	5.14529	60.9553
104565	29.98	0.51501	2.997		15.7693	5.16042	60.9146
104765	30.42	0.51615	3.001		16.0007	5.17184	60.9959
104965	30.28	0.5172	3		15.9271	5.18236	60.9756
105165	30.8	0.51832	2.998		16.2006	5.19359	60.935
105365	31.56	0.51845	3.002		16.6003	5.19489	61.0163
105565	31.54	0.51926	3		16.5898	5.20301	60.9756
105765	31.36	0.52012	3.001		16.4951	5.21162	60.9959
105965	31.02	0.52144	2.998		16.3163	5.22485	60.935
106165	30.82	0.52261	3.001		16.2111	5.23657	60.9959
106365	30.48	0.52373	3.002		16.0323	5.2478	61.0163
106565	30.4	0.52496	2.998		15.9902	5.26012	60.935
106765	31.08	0.52612	2.998		16.3479	5.27174	60.935
106965	31.86	0.52665	2.998		16.7581	5.27705	60.935
107165	32.14	0.52715	2.999		16.9054	5.28206	60.9553
107365	31.86	0.52805	3		16.7581	5.29108	60.9756
107565	31.34	0.52933	2.999		16.4846	5.30391	60.9553
107765	31.26	0.53056	2.999		16.4425	5.31623	60.9553
107965	31.14	0.5315	2.998		16.3794	5.32565	60.935
108165	31.16	0.53259	3.001		16.3899	5.33657	60.9959
108365	31.18	0.53369	3.001		16.4005	5.3476	60.9959
108565	31.46	0.53479	3		16.5477	5.35862	60.9756
108765	32.1	0.53587	3		16.8844	5.36944	60.9756
108965	32.52	0.53612	2.998		17.1053	5.37194	60.935
109165	32.54	0.53681	3.001		17.1158	5.37886	60.9959
109365	32.26	0.53791	3.002		16.9685	5.38988	61.0163
109565	32.2	0.53903	3.001		16.937	5.4011	60.9959
109765	31.64	0.54023	2.996		16.6424	5.41313	60.8943
109965	31.72	0.5413	2.999		16.6845	5.42385	60.9553
110165	31.66	0.54242	3.001		16.6529	5.43507	60.9959
110365	31.46	0.54369	2.998		16.5477	5.4478	60.935
110565	32.2	0.54443	3		16.937	5.45521	60.9756
110765	32.04	0.54559	3		16.8528	5.46683	60.9756
110965	32.6	0.54649	2.996		17.1474	5.47585	60.8943
111165	32.6	0.54759	2.999		17.1474	5.48687	60.9553
111365	32.94	0.54837	2.999		17.3262	5.49469	60.9553
111565	33.08	0.54932	3.002		17.3998	5.50421	61.0163
111765	33.28	0.54975	3.004		17.505	5.50852	61.0569
111965	33.34	0.55063	3.003		17.5366	5.51733	61.0366
112165	33.26	0.55146	2.996		17.4945	5.52565	60.8943
112365	33.12	0.55261	3		17.4209	5.53717	60.9756
112565	33.36	0.55372	3.002		17.5471	5.5483	61.0163
112765	33.34	0.55463	3		17.5366	5.55741	60.9756
112965	33.34	0.55553	3		17.5366	5.56643	60.9756
113165	33.14	0.5567	3.003		17.4314	5.57816	61.0366
113365	32.94	0.55767	2.996		17.3262	5.58788	60.8943
113565	32.88	0.55879	2.999		17.2946	5.5991	60.9553
113765	33.3	0.55975	3.001		17.5156	5.60872	60.9959
113965	33.34	0.56063	3.002		17.5366	5.61754	61.0163
114165	33.34	0.56153	2.997		17.5366	5.62655	60.9146
114365	33.84	0.56246	3.003		17.7996	5.63587	61.0366
114565	33.86	0.56385	3.002		17.8101	5.6498	61.0163
114765	33.6	0.56504	2.996		17.6734	5.66172	60.8943
114965	33.32	0.56614	2.999		17.5261	5.67275	60.9553
115165	33.28	0.56705	2.999		17.505	5.68186	60.9553
115365	33.3	0.56805	3.004		17.5156	5.69188	61.0569
115565	33.4	0.56901	2.998		17.5682	5.7015	60.935
115765	33.72	0.57	2.999		17.7365	5.71142	60.9553
115965	33.58	0.57095	3.003		17.6628	5.72094	61.0366
116165	33.48	0.57198	2.999		17.6102	5.73126	60.9553
116365	33.72	0.5728	2.999		17.7365	5.73948	60.9553
116565	33.82	0.57386	2.998		17.7891	5.7501	60.935
116765	34.04	0.57469	3.003		17.9048	5.75842	61.0366
116965	34.04	0.57469	3.003		17.9048	5.75842	61.0366
117165	34.16	0.57694	2.998		17.9679	5.78096	60.935
117365	34.5	0.57783	3		18.1468	5.78988	60.9756
117565	34.54	0.57871	3.001		18.1678	5.7987	60.9959
117765	34.86	0.5794	3.001		18.3361	5.80561	60.9959
117965	34.96	0.58006	3.003		18.3887	5.81222	61.0366
118165	34.88	0.58099	2.999		18.3466	5.82154	60.9553
118365	34.48	0.58213	3.002		18.1362	5.83297	61.0163
118565	34.54	0.58321	2.999		18.1678	5.84379	60.9553
118765	34.06	0.58438	3		17.9153	5.85551	60.9756
118965	34.02	0.58559	2.996		17.8943	5.86764	60.8943
119165	34.1	0.58647	3		17.9364	5.87645	60.9756
119365	33.86	0.58775	3		17.8101	5.88928	60.9756
119565	34.74	0.58854	3		18.273	5.89719	60.9756
119765	34.62	0.58978	2.998		18.2099	5.90962	60.935
119965	35.3	0.59085	3.001		18.5676	5.92034	60.9959
120165	35.6	0.59084	3		18.7253	5.92024	60.9756
120365	35.56	0.59175	2.997		18.7043	5.92936	60.9146
120565	35.46	0.59279	3		18.6517	5.93978	60.9756
120765	35.58	0.59385	3		18.7148	5.9504	60.9756
120965	35.66	0.59472	2.996		18.7569	5.95912	60.8943
121165	35.82	0.59576	3.002		18.8411	5.96954	61.0163
121365	35.9	0.59684	2.999		18.8831	5.98036	60.9553
121565	35.76	0.59828	2.999		18.8095	5.99479	60.9553
121765	35.88	0.59874	2.997		18.8726	5.9994	60.9146
121965	35.98	0.59981	3.001		18.9252	6.01012	60.9959
122165	36.02	0.60099	3.001		18.9463	6.02194	60.9959
122365	35.84	0.60236	3.001		18.8516	6.03567	60.9959
122565	36.12	0.60306	2.999		18.9989	6.04269	60.9553
122765	36.2	0.60393	3.002		19.0409	6.0514	61.0163
122965	36.24	0.60502	3.001		19.062	6.06232	60.9959
123165	36.06	0.60628	3.002		18.9673	6.07495	61.0163
123365	36.48	0.60693	3.002		19.1882	6.08146	61.0163
123565	36.4	0.60776	2.999		19.1461	6.08978	60.9553
123765	36.54	0.60861	3.002		19.2198	6.0983	61.0163
123965	36.56	0.6094	3.002		19.2303	6.10621	61.0163
124165	36.52	0.61042	3.001		19.2093	6.11643	60.9959
124365	36.76	0.61153	2.997		19.3355	6.12756	60.9146
124565	36.64	0.61228	2.999		19.2724	6.13507	60.9553
124765	36.4	0.61346	3.001		19.1461	6.14689	60.9959
124965	36.02	0.61459	2.998		18.9463	6.15822	60.935
125165	35.72	0.6158	3.001		18.7885	6.17034	60.9959
125365	35.7	0.61681	2.999		18.7779	6.18046	60.9553
125565	35.72	0.6179	2.998		18.7885	6.19138	60.935
125765	35.96	0.61901	3		18.9147	6.20251	60.9756
125965	36.14	0.61995	3		19.0094	6.21192	60.9756
126165	35.96	0.62121	3		18.9147	6.22455	60.9756
126365	37.08	0.62172	3		19.5038	6.22966	60.9756
126565	37.12	0.62221	2.999		19.5249	6.23457	60.9553
126765	37.14	0.6231	3.002		19.5354	6.24349	61.0163
126965	37.08	0.62422	3.003		19.5038	6.25471	61.0366
127165	37	0.62515	3		19.4617	6.26403	60.9756
127365	36.92	0.62628	2.997		19.4197	6.27535	60.9146
127565	36.76	0.62723	3.001		19.3355	6.28487	60.9959
127765	36.92	0.62828	2.999		19.4197	6.29539	60.9553
127965	36.68	0.62946	2.999		19.2934	6.30721	60.9553
128165	36.54	0.63051	3.001		19.2198	6.31774	60.9959
128365	36.48	0.63143	3		19.1882	6.32695	60.9756
128565	36.24	0.63272	3		19.062	6.33988	60.9756
128765	36.72	0.63365	2.998		19.3145	6.3492	60.935
128965	36.78	0.63503	2.999		19.346	6.36303	60.9553
129165	37.72	0.6351	3.002		19.8405	6.36373	61.0163
129365	37.7	0.63591	3.003		19.8299	6.37184	61.0366
129565	37.62	0.63693	2.999		19.7879	6.38206	60.9553
129765	37.54	0.63796	3		19.7458	6.39238	60.9756
129965	37.2	0.63918	2.999		19.5669	6.40461	60.9553
130165	36.72	0.64055	2.999		19.3145	6.41834	60.9553
130365	37.18	0.64159	3		19.5564	6.42876	60.9756
130565	37.42	0.6423	2.996		19.6827	6.43587	60.8943
130765	37.08	0.64332	3		19.5038	6.44609	60.9756
130965	36.68	0.64476	2.999		19.2934	6.46052	60.9553
131165	36.68	0.64476	2.999		19.2934	6.46052	60.9553
131365	37.16	0.64639	3		19.5459	6.47685	60.9756
131565	37.4	0.64731	2.999		19.6721	6.48607	60.9553
131765	37.26	0.64826	2.999		19.5985	6.49559	60.9553
131965	37.22	0.64947	2.999		19.5775	6.50772	60.9553
132165	37.88	0.65054	3		19.9246	6.51844	60.9756
132365	38.44	0.65125	3.002		20.2192	6.52555	61.0163
132565	38.7	0.65216	3.003		20.3559	6.53467	61.0366
132765	38.46	0.65264	2.999		20.2297	6.53948	60.9553
132965	38.18	0.65374	3.003		20.0824	6.5505	61.0366
133165	37.68	0.65491	2.999		19.8194	6.56222	60.9553
133365	38.04	0.65599	2.997		20.0088	6.57305	60.9146
133565	38.04	0.65599	2.997		20.0088	6.57305	60.9146
133765	37.9	0.65834	3.001		19.9351	6.59659	60.9959
133965	38.36	0.65927	3		20.1771	6.60591	60.9756
134165	38.72	0.66025	2.999		20.3664	6.61573	60.9553
134365	39.06	0.66073	2.999		20.5453	6.62054	60.9553
134565	38.92	0.66138	3		20.4716	6.62705	60.9756
134765	38.7	0.66256	3		20.3559	6.63888	60.9756
134965	38.38	0.66377	2.998		20.1876	6.651	60.935
135165	38.22	0.66482	2.997		20.1035	6.66152	60.9146
135365	37.86	0.66615	3		19.9141	6.67485	60.9756
135565	38.4	0.66716	2.998		20.1981	6.68497	60.935
135765	38.86	0.6682	3		20.4401	6.69539	60.9756
135965	38.98	0.66926	2.998		20.5032	6.70601	60.935
136165	39.58	0.66945	2.999		20.8188	6.70792	60.9553
136365	39.48	0.67018	3.002		20.7662	6.71523	61.0163
136565	39.06	0.67143	3		20.5453	6.72776	60.9756
136765	39.12	0.67241	3.001		20.5768	6.73758	60.9959
136965	39.26	0.67336	2.998		20.6505	6.74709	60.935
137165	39.4	0.67441	3		20.7241	6.75762	60.9756
137365	39.48	0.67528	3.001		20.7662	6.76633	60.9959
137565	39.1	0.67642	3		20.5663	6.77776	60.9756
137765	39.32	0.67744	3		20.682	6.78798	60.9756
137965	39.04	0.67854	3.001		20.5348	6.799	60.9959
138165	38.76	0.67963	3.002		20.3875	6.80992	61.0163
138365	38.78	0.68093	3.002		20.398	6.82295	61.0163
138565	39.48	0.68198	3.003		20.7662	6.83347	61.0366
138765	40	0.6828	3		21.0397	6.84168	60.9756
138965	40.02	0.68399	2.999		21.0502	6.85361	60.9553
139165	40.18	0.68454	2.998		21.1344	6.85912	60.935
139365	39.7	0.68551	2.998		20.8819	6.86884	60.935
139565	39.36	0.68652	2.998		20.7031	6.87896	60.935
139765	39.04	0.68754	3.001		20.5348	6.88918	60.9959
139965	39.32	0.68854	2.999		20.682	6.8992	60.9553
140165	39.46	0.68959	2.998		20.7557	6.90972	60.935
140365	39.46	0.69059	3		20.7557	6.91974	60.9756
140565	39.58	0.69165	2.999		20.8188	6.93036	60.9553
140765	39.58	0.69265	2.999		20.8188	6.94038	60.9553
140965	39.68	0.69381	3.003		20.8714	6.952	61.0366
141165	39.78	0.69478	2.997		20.924	6.96172	60.9146
141365	40.08	0.69557	2.999		21.0818	6.96964	60.9553
141565	39.9	0.69653	3		20.9871	6.97926	60.9756
141765	39.82	0.69746	3.002		20.945	6.98858	61.0163
141965	40	0.6984	3		21.0397	6.998	60.9756
142165	40.32	0.69929	3.003		21.208	7.00691	61.0366
142365	40.38	0.69997	2.996		21.2396	7.01373	60.8943
142565	40.44	0.70105	3.001		21.2712	7.02455	60.9959
142765	40.44	0.70195	2.999		21.2712	7.03357	60.9553
142965	40.78	0.70293	2.999		21.45	7.04339	60.9553
143165	40.76	0.70383	3.003		21.4395	7.0524	61.0366
143365	41.26	0.70486	3		21.7025	7.06273	60.9756
143565	41	0.70625	2.998		21.5657	7.07665	60.935
143765	40.76	0.70693	2.999		21.4395	7.08347	60.9553
143965	40.42	0.70815	2.994		21.2606	7.09569	60.8537
144165	40.6	0.70909	3		21.3553	7.10511	60.9756
144365	40.74	0.70994	2.999		21.429	7.11363	60.9553
144565	40.58	0.7109	3		21.3448	7.12325	60.9756
144765	41.08	0.71182	2.999		21.6078	7.13246	60.9553
144965	41.1	0.71272	2.999		21.6183	7.14148	60.9553
145165	41.38	0.71362	3.002		21.7656	7.1505	61.0163
145365	41.58	0.71455	2.999		21.8708	7.15982	60.9553
145565	41.74	0.71549	2.999		21.9549	7.16924	60.9553
145765	41.72	0.7164	3		21.9444	7.17836	60.9756
145965	41.4	0.71821	3		21.7761	7.19649	60.9756
146165	41.56	0.71905	3.002		21.8603	7.20491	61.0163
146365	41.02	0.72024	3.001		21.5762	7.21683	60.9959
146565	41.22	0.72107	2.999		21.6814	7.22515	60.9553
146765	41	0.72215	3.002		21.5657	7.23597	61.0163
146965	41.5	0.72278	2.999		21.8287	7.24228	60.9553
147165	41.54	0.72356	2.999		21.8497	7.2501	60.9553
147365	41.78	0.72438	3.002		21.976	7.25832	61.0163
147565	41.9	0.72544	2.999		22.0391	7.26894	60.9553
147765	41.84	0.72636	3		22.0075	7.27816	60.9756
147965	41.94	0.72732	3.001		22.0601	7.28778	60.9959
148165	42.04	0.72829	2.999		22.1127	7.29749	60.9553
148365	41.9	0.72944	2.999		22.0391	7.30902	60.9553
148565	41.84	0.73056	2.998		22.0075	7.32024	60.935
148765	42.04	0.73129	2.996		22.1127	7.32756	60.8943
148965	42.08	0.73237	2.998		22.1338	7.33838	60.935
149165	41.98	0.73351	2.998		22.0812	7.3498	60.935
149365	42.04	0.73439	2.999		22.1127	7.35862	60.9553
149565	42.52	0.73512	2.998		22.3652	7.36593	60.935
149765	42.76	0.73613	2.999		22.4915	7.37605	60.9553
149965	42.82	0.73711	3		22.523	7.38587	60.9756
150165	42.96	0.73806	3		22.5967	7.39539	60.9756
150365	43.02	0.73934	2.999		22.6282	7.40822	60.9553
150565	43	0.74055	3		22.6177	7.42034	60.9756
150765	43	0.74135	2.997		22.6177	7.42836	60.9146
150965	42.6	0.74279	3.001		22.4073	7.44279	60.9959
151165	42.74	0.74344	2.996		22.4809	7.4493	60.8943
151365	42.32	0.74429	3.001		22.26	7.45782	60.9959
151565	42.58	0.7453	2.999		22.3968	7.46794	60.9553
151765	43.06	0.74603	2.999		22.6493	7.47525	60.9553
151965	43.3	0.74685	2.997		22.7755	7.48347	60.9146
152165	43.34	0.74833	3		22.7965	7.4983	60.9756
152365	43.24	0.74967	3		22.7439	7.51172	60.9756
152565	42.88	0.75049	2.999		22.5546	7.51994	60.9553
152765	42.46	0.75154	3.001		22.3337	7.53046	60.9959
152965	42.92	0.75218	3		22.5756	7.53687	60.9756
153165	43.24	0.75307	3.001		22.7439	7.54579	60.9959
153365	43.64	0.75373	2.998		22.9543	7.5524	60.935
153565	43.82	0.75486	3.001		23.049	7.56373	60.9959
153765	43.76	0.75618	3.001		23.0175	7.57695	60.9959
153965	43.56	0.75735	2.999		22.9123	7.58868	60.9553
154165	43.34	0.75813	2.997		22.7965	7.59649	60.9146
154365	43.36	0.75902	2.998		22.8071	7.60541	60.935
154565	43.78	0.75978	3.003		23.028	7.61303	61.0366
154765	44.04	0.76059	3.002		23.1647	7.62114	61.0163
154965	43.88	0.76244	3.002		23.0806	7.63968	61.0163
155165	43.56	0.76325	3		22.9123	7.6478	60.9756
155365	43.38	0.76412	2.999		22.8176	7.65651	60.9553
155565	43.78	0.76478	2.996		23.028	7.66313	60.8943
155765	44.14	0.76555	3.002		23.2173	7.67084	61.0163
155965	44.32	0.76649	2.999		23.312	7.68026	60.9553
156165	44.28	0.7681	3.003		23.291	7.69639	61.0366
156365	43.72	0.7689	3		22.9964	7.70441	60.9756
156565	43.98	0.76971	2.999		23.1332	7.71253	60.9553
156765	44.5	0.77053	3.001		23.4067	7.72074	60.9959
156965	44.58	0.7716	2.999		23.4488	7.73146	60.9553
157165	44.64	0.77288	2.998		23.4803	7.74429	60.935
157365	44.28	0.7737	3		23.291	7.75251	60.9756
157565	44.52	0.77442	2.998		23.4172	7.75972	60.935
157765	44.82	0.77541	3.002		23.575	7.76964	61.0163
157965	44.62	0.77678	3.001		23.4698	7.78337	60.9959
158165	44.2	0.77763	3		23.2489	7.79188	60.9756
158365	44.64	0.77848	3.001		23.4803	7.8004	60.9959
158565	44.96	0.77936	3		23.6486	7.80922	60.9756
158765	44.88	0.78079	3.002		23.6066	7.82355	61.0163
158965	44.3	0.7818	3.003		23.3015	7.83367	61.0366
159165	44.04	0.78279	3.001		23.1647	7.84359	60.9959
159365	44.36	0.78347	2.998		23.333	7.8504	60.935
159565	44.86	0.7845	3.001		23.596	7.86072	60.9959
159765	44.68	0.78546	3		23.5014	7.87034	60.9756
159965	45.04	0.78624	3		23.6907	7.87816	60.9756
160165	45.02	0.78744	2.999		23.6802	7.89018	60.9553
160365	44.38	0.78877	3		23.3436	7.90351	60.9756
160565	44.54	0.78951	2.997		23.4277	7.91092	60.9146
160765	45.04	0.79024	3		23.6907	7.91824	60.9756
160965	45.18	0.79169	3		23.7644	7.93277	60.9756
161165	44.74	0.79274	3		23.5329	7.94329	60.9756
161365	44.5	0.79353	3		23.4067	7.9512	60.9756
161565	45.22	0.79417	2.999		23.7854	7.95762	60.9553
161765	45.6	0.79514	2.998		23.9853	7.96733	60.935
161965	45.3	0.79664	2.999		23.8275	7.98236	60.9553
162165	44.84	0.79771	3		23.5855	7.99309	60.9756
162365	45	0.79845	2.999		23.6697	8.0005	60.9553
162565	45.48	0.79908	3		23.9222	8.00681	60.9756
162765	45.78	0.80018	2.999		24.08	8.01784	60.9553
162965	45	0.80175	2.995		23.6697	8.03357	60.874
163165	45.46	0.80209	3		23.9116	8.03697	60.9756
163365	45.86	0.80295	3.002		24.122	8.04559	61.0163
163565	45.56	0.80445	2.999		23.9642	8.06062	60.9553
163765	45.82	0.80496	2.999		24.101	8.06573	60.9553
163965	46.04	0.80619	2.999		24.2167	8.07806	60.9553
164165	45.44	0.8073	2.999		23.9011	8.08918	60.9553
164365	45.76	0.80788	3.003		24.0694	8.09499	61.0366
164565	45.7	0.8094	2.999		24.0379	8.11022	60.9553
164765	45.72	0.81	2.997		24.0484	8.11623	60.9146
164965	46.1	0.81097	2.999		24.2483	8.12595	60.9553
165165	45.58	0.81225	3		23.9748	8.13878	60.9756
165365	45.66	0.81302	3.003		24.0168	8.14649	61.0366
165565	46.36	0.81367	2.999		24.385	8.15301	60.9553
165765	45.9	0.81534	3.003		24.1431	8.16974	61.0366
165965	45.8	0.81597	3.002		24.0905	8.17605	61.0163
166165	46.2	0.81683	3		24.3009	8.18467	60.9756
166365	46.44	0.81795	3.004		24.4271	8.19589	61.0569
166565	46.1	0.81907	2.997		24.2483	8.20711	60.9146
166765	46.38	0.81967	2.998		24.3956	8.21313	60.935
166965	46.02	0.82129	3		24.2062	8.22936	60.9756
167165	46.16	0.82194	3.001		24.2798	8.23587	60.9959
167365	46.54	0.82271	2.999		24.4797	8.24359	60.9553
167565	46.56	0.8241	2.997		24.4902	8.25752	60.9146
167765	46.34	0.82488	3		24.3745	8.26533	60.9756
167965	46.78	0.82563	3.002		24.6059	8.27285	61.0163
168165	46.7	0.82705	2.999		24.5639	8.28707	60.9553
168365	46.24	0.82802	3.002		24.3219	8.29679	61.0163
168565	46.84	0.82861	3.001		24.6375	8.30271	60.9959
168765	46.82	0.82971	2.998		24.627	8.31373	60.935
168965	46.74	0.83104	2.998		24.5849	8.32705	60.935
169165	46.86	0.8316	3		24.648	8.33267	60.9756
169365	47.06	0.83293	2.999		24.7532	8.34599	60.9553
169565	47.06	0.83293	2.999		24.7532	8.34599	60.9553
169765	47.04	0.83454	2.998		24.7427	8.36212	60.935
169965	46.94	0.83597	2.998		24.6901	8.37645	60.935
170165	46.92	0.83668	3		24.6796	8.38357	60.9756
170365	47.28	0.83775	3.001		24.8689	8.39429	60.9959
170565	47.28	0.83775	3.001		24.8689	8.39429	60.9959
170765	47.46	0.83949	3.001		24.9636	8.41172	60.9959
170965	46.82	0.84081	2.998		24.627	8.42495	60.935
171165	47.3	0.84135	3		24.8795	8.43036	60.9756
171365	47.52	0.84277	3.002		24.9952	8.44459	61.0163
171565	47.52	0.84277	3.002		24.9952	8.44459	61.0163
171766	47.56	0.84445	2.999		25.0162	8.46142	60.9553
171967	47.64	0.84563	2.997		25.0583	8.47325	60.9146
172169	47.2	0.84658	2.999		24.8269	8.48277	60.9553
172369	47.76	0.84718	3.001		25.1214	8.48878	60.9959
172569	47.3	0.84885	2.999		24.8795	8.50551	60.9553
172769	47.36	0.84942	2.999		24.911	8.51122	60.9553
172969	47.88	0.85024	3.003		25.1845	8.51944	61.0366
173169	47.52	0.85157	3.002		24.9952	8.53277	61.0163
173369	47.82	0.85226	3.002		25.153	8.53968	61.0163
173569	47.64	0.85383	2.998		25.0583	8.55541	60.935
173769	47.78	0.85428	3		25.1319	8.55992	60.9756
173969	47.7	0.85571	3		25.0899	8.57425	60.9756
174169	47.64	0.85633	3		25.0583	8.58046	60.9756
174369	47.92	0.85763	2.997		25.2056	8.59349	60.9146
174569	47.94	0.85812	3		25.2161	8.5984	60.9756
174769	48.18	0.85954	2.998		25.3423	8.61263	60.935
174969	48.14	0.86015	3.002		25.3213	8.61874	61.0163
175169	47.9	0.86154	3		25.1951	8.63267	60.9756
175369	48.28	0.8621	3		25.3949	8.63828	60.9756
175569	47.9	0.86354	3.002		25.1951	8.65271	61.0163
175769	48.34	0.86398	2.996		25.4265	8.65711	60.8943
175969	48.08	0.86547	3.002		25.2897	8.67204	61.0163
176169	48.26	0.86601	2.997		25.3844	8.67745	60.9146
176369	48.2	0.86773	3		25.3529	8.69469	60.9756
176569	48.42	0.86815	2.997		25.4686	8.6989	60.9146
176769	48.74	0.86924	3.003		25.6369	8.70982	61.0366
176969	48.74	0.86924	3.003		25.6369	8.70982	61.0366
177169	48.68	0.87096	3		25.6053	8.72705	60.9756
177369	48.56	0.8724	3		25.5422	8.74148	60.9756
177569	48.56	0.873	2.997		25.5422	8.74749	60.9146
177769	48.98	0.87406	2.998		25.7631	8.75812	60.935
177969	48.46	0.87524	3		25.4896	8.76994	60.9756
178169	48.94	0.87587	3		25.7421	8.77625	60.9756
178369	48.58	0.8772	2.999		25.5527	8.78958	60.9553
178569	48.98	0.87776	3.001		25.7631	8.79519	60.9959
178769	48.94	0.87917	3		25.7421	8.80932	60.9756
178969	48.94	0.87997	2.999		25.7421	8.81733	60.9553
179169	49.12	0.88111	3.003		25.8368	8.82876	61.0366
179369	48.64	0.88198	3.001		25.5843	8.83747	60.9959
179569	48.64	0.88198	3.001		25.5843	8.83747	60.9959
179769	48.68	0.88406	3		25.6053	8.85832	60.9756
179969	49.16	0.88469	2.999		25.8578	8.86463	60.9553
180169	49.28	0.88605	3		25.9209	8.87826	60.9756
180369	49.22	0.88677	3.001		25.8894	8.88547	60.9959
180569	49.4	0.88821	3.003		25.9841	8.8999	61.0366
180769	49.08	0.88872	2.999		25.8157	8.90501	60.9553
180969	49.08	0.88872	2.999		25.8157	8.90501	60.9553
181169	48.88	0.89089	2.999		25.7105	8.92675	60.9553
181369	49.52	0.89217	3.001		26.0472	8.93958	60.9959
181569	49.46	0.89259	3.002		26.0156	8.94379	61.0163
181769	49.52	0.89407	3		26.0472	8.95862	60.9756
181969	49.56	0.89455	2.999		26.0682	8.96343	60.9553
182169	49.5	0.89618	3		26.0367	8.97976	60.9756
182369	49.38	0.89662	3		25.9735	8.98417	60.9756
182569	49.92	0.89783	3.001		26.2576	8.99629	60.9959
182769	49.6	0.89844	2.996		26.0892	9.0024	60.8943
182969	49.58	0.89975	3.003		26.0787	9.01553	61.0366
183169	50.08	0.90057	3.001		26.3417	9.02375	60.9959
183369	49.94	0.90152	3.003		26.2681	9.03327	61.0366
183569	49.56	0.90265	2.999		26.0682	9.04459	60.9553
183769	49.56	0.90265	2.999		26.0682	9.04459	60.9553
183969	49.78	0.90458	3.001		26.1839	9.06393	60.9959
184169	50.28	0.9056	3.002		26.4469	9.07415	61.0163
184369	50.08	0.90637	3		26.3417	9.08186	60.9756
184569	50.16	0.90774	3		26.3838	9.09559	60.9756
184769	50.42	0.90825	2.998		26.5206	9.1007	60.935
184969	50.02	0.90959	3		26.3102	9.11413	60.9756
185169	50.52	0.91042	3		26.5732	9.12244	60.9756
185369	49.86	0.91155	2.999		26.226	9.13377	60.9553
185569	50.36	0.91277	2.999		26.489	9.14599	60.9553
185769	50.52	0.91322	3.001		26.5732	9.1505	60.9959
185969	50.24	0.91452	3.003		26.4259	9.16353	61.0366
186169	50.42	0.91575	3.001		26.5206	9.17585	60.9959
186369	50.3	0.9162	2.997		26.4574	9.18036	60.9146
186569	50.52	0.91762	3		26.5732	9.19459	60.9756
186769	50.52	0.91812	3.002		26.5732	9.1996	61.0163
186969	50.28	0.9195	3.001		26.4469	9.21343	60.9959
187169	50.8	0.92032	2.997		26.7204	9.22164	60.9146
187369	50.6	0.92129	3.001		26.6152	9.23136	60.9959
187569	50.56	0.9225	3.004		26.5942	9.24349	61.0569
187769	50.82	0.92351	2.997		26.731	9.25361	60.9146
187969	50.86	0.9241	3		26.752	9.25952	60.9756
188169	50.44	0.92545	3.001		26.5311	9.27305	60.9959
188369	51.06	0.92623	3.001		26.8572	9.28086	60.9959
188569	50.94	0.92717	3		26.7941	9.29028	60.9756
188769	50.76	0.92863	2.997		26.6994	9.30491	60.9146
188969	51.02	0.92894	2.998		26.8362	9.30802	60.935
189169	50.66	0.93027	2.996		26.6468	9.32134	60.8943
189369	51	0.93145	2.999		26.8256	9.33317	60.9553
189569	51.12	0.93191	2.999		26.8888	9.33778	60.9553
189769	50.68	0.93326	3		26.6573	9.3513	60.9756
189969	51.22	0.93437	2.999		26.9414	9.36242	60.9553
190169	51.32	0.93494	2.998		26.994	9.36814	60.935
190369	51	0.93625	3		26.8256	9.38126	60.9756
190569	51.42	0.9372	2.999		27.0466	9.39078	60.9553
190769	51.28	0.93785	3.001		26.9729	9.39729	60.9959
190969	50.88	0.93919	2.999		26.7625	9.41072	60.9553
191169	51.3	0.94025	2.999		26.9834	9.42134	60.9553
191369	51.48	0.94098	2.999		27.0781	9.42866	60.9553
191569	51.28	0.94205	3		26.9729	9.43938	60.9756
191769	51.42	0.9432	3.001		27.0466	9.4509	60.9959
191969	51.66	0.94372	2.998		27.1728	9.45611	60.935
192169	51.24	0.94527	3.001		26.9519	9.47164	60.9959
192369	51.84	0.94596	3		27.2675	9.47856	60.9756
192569	51.36	0.94682	3.003		27.015	9.48717	61.0366
192769	51.22	0.94807	2.999		26.9414	9.4997	60.9553
192969	51.86	0.94905	2.997		27.278	9.50952	60.9146
193169	51.84	0.94976	2.999		27.2675	9.51663	60.9553
193369	51.6	0.95114	2.998		27.1412	9.53046	60.935
193569	52.1	0.95196	2.997		27.4042	9.53868	60.9146
193769	51.96	0.95271	3		27.3306	9.54619	60.9756
193969	51.72	0.9539	3.001		27.2044	9.55812	60.9959
194169	52.16	0.95504	3		27.4358	9.56954	60.9756
194369	52.18	0.95534	2.997		27.4463	9.57255	60.9146
194569	51.82	0.95676	3		27.257	9.58677	60.9756
194769	51.82	0.95796	3		27.257	9.5988	60.9756
194969	52.32	0.95879	3.002		27.52	9.60711	61.0163
195169	52.24	0.95972	3		27.4779	9.61643	60.9756
195369	51.98	0.96081	3.001		27.3411	9.62735	60.9959
195569	52.34	0.96198	3.002		27.5305	9.63908	61.0163
195769	52.38	0.96257	2.999		27.5515	9.64499	60.9553
195969	52.3	0.96369	3.001		27.5094	9.65621	60.9959
196169	52.32	0.96479	3.002		27.52	9.66723	61.0163
196369	52.62	0.96588	2.997		27.6777	9.67816	60.9146
196569	52.68	0.96656	3.002		27.7093	9.68497	61.0163
196769	52.4	0.96796	3		27.562	9.699	60.9756
196969	52.6	0.96849	2.999		27.6672	9.70431	60.9553
197169	52.32	0.96959	2.998		27.52	9.71533	60.935
197369	52.4	0.97086	3		27.562	9.72806	60.9756
197569	52.94	0.97157	3.002		27.8461	9.73517	61.0163
197769	52.54	0.97241	3		27.6357	9.74359	60.9756
197969	52.92	0.97368	2.997		27.8355	9.75631	60.9146
198169	52.76	0.97433	3.003		27.7514	9.76283	61.0366
198369	52.78	0.97563	3		27.7619	9.77585	60.9756
198569	53.02	0.97644	3.002		27.8881	9.78397	61.0163
198769	52.64	0.97738	3.003		27.6883	9.79339	61.0366
198969	52.56	0.9789	3.001		27.6462	9.80862	60.9959
199169	53.12	0.97921	3		27.9407	9.81172	60.9756
199369	52.84	0.98051	3.002		27.7935	9.82475	61.0163
199569	52.82	0.98161	2.999		27.7829	9.83577	60.9553
199769	53.18	0.98249	3.003		27.9723	9.84459	61.0366
199969	53.3	0.98324	3.001		28.0354	9.8521	60.9959
200169	53.08	0.98442	3.001		27.9197	9.86393	60.9959
200369	53.12	0.98561	2.999		27.9407	9.87585	60.9553
200569	53.14	0.9863	2.999		27.9513	9.88277	60.9553
200769	52.94	0.98767	2.999		27.8461	9.89649	60.9553
200969	53.44	0.9882	3.001		28.1091	9.9018	60.9959
201169	52.94	0.98937	3.002		27.8461	9.91353	61.0163
201369	53.54	0.99056	3		28.1617	9.92545	60.9756
201569	53.48	0.99108	2.998		28.1301	9.93066	60.935
201769	53.32	0.99224	3		28.0459	9.94228	60.9756
201969	53.7	0.9934	3.001		28.2458	9.95391	60.9959
202169	53.68	0.99411	3.002		28.2353	9.96102	61.0163
202369	53.36	0.99532	2.999		28.067	9.97315	60.9553
202569	53.78	0.99648	2.995		28.2879	9.98477	60.874
202769	53.6	0.99704	3		28.1932	9.99038	60.9756
202969	53.46	0.99859	2.999		28.1196	10.0059	60.9553
203169	53.9	0.99904	2.998		28.351	10.0104	60.935
203369	53.52	1.00017	3		28.1511	10.0217	60.9756
203569	53.92	1.00113	2.999		28.3615	10.0314	60.9553
203769	53.6	1.00214	2.998		28.1932	10.0415	60.935
203969	54.06	1.00308	3.001		28.4352	10.0509	60.9959
204169	53.98	1.00391	3		28.3931	10.0592	60.9756
204369	53.88	1.00504	2.998		28.3405	10.0705	60.935
204569	53.76	1.00648	2.997		28.2774	10.085	60.9146
204769	54.16	1.00684	2.999		28.4878	10.0886	60.9553
204969	53.86	1.00805	3.001		28.33	10.1007	60.9959
205169	54.08	1.00917	2.998		28.4457	10.1119	60.935
205369	53.74	1.00999	2.997		28.2669	10.1201	60.9146
205569	53.9	1.01134	2.999		28.351	10.1337	60.9553
205769	54.1	1.01197	2.999		28.4562	10.14	60.9553
205969	54.14	1.01315	3.002		28.4773	10.1518	61.0163
206169	54.36	1.01407	2.999		28.593	10.161	60.9553
206369	54.3	1.0149	3		28.5614	10.1693	60.9756
206569	54.08	1.01597	3.002		28.4457	10.1801	61.0163
206769	54.34	1.01708	3.002		28.5825	10.1912	61.0163
206969	54.48	1.01773	2.999		28.6561	10.1977	60.9553
207169	54.18	1.01894	2.998		28.4983	10.2098	60.935
207369	54.58	1.0198	3		28.7087	10.2184	60.9756
207569	54.24	1.02092	3		28.5299	10.2297	60.9756
207769	54.54	1.02161	2.999		28.6877	10.2366	60.9553
207969	54.18	1.02284	3.001		28.4983	10.2489	60.9959
208169	54.42	1.02395	2.999		28.6245	10.26	60.9553
208369	54.78	1.02493	3		28.8139	10.2698	60.9756
208569	54.44	1.02585	2.996		28.6351	10.2791	60.8943
208769	54.62	1.02688	3.002		28.7297	10.2894	61.0163
208969	54.82	1.02781	2.999		28.8349	10.2987	60.9553
209169	54.64	1.02878	2.999		28.7403	10.3084	60.9553
209369	54.7	1.02996	2.998		28.7718	10.3202	60.935
209569	54.8	1.03062	2.997		28.8244	10.3269	60.9146
209769	54.66	1.03187	2.995		28.7508	10.3394	60.874
209969	54.92	1.03278	2.996		28.8875	10.3485	60.8943
210169	54.9	1.03368	3		28.877	10.3575	60.9756
210369	54.82	1.03471	2.998		28.8349	10.3678	60.935
210569	54.86	1.0359	3.001		28.856	10.3798	60.9959
210769	55.1	1.03651	2.999		28.9822	10.3859	60.9553
210969	54.78	1.03763	2.998		28.8139	10.3971	60.935
211169	54.92	1.03878	2.998		28.8875	10.4086	60.935
211369	55.1	1.03952	3		28.9822	10.416	60.9756
211569	55.1	1.03952	3		28.9822	10.416	60.9756
211769	55.22	1.04147	2.997		29.0453	10.4356	60.9146
211969	54.74	1.04274	3.002		28.7929	10.4483	61.0163
212169	55.38	1.04352	2.999		29.1295	10.4561	60.9553
212369	55.22	1.04447	2.997		29.0453	10.4656	60.9146
212569	54.96	1.04576	2.998		28.9086	10.4786	60.935
212769	55.5	1.04677	3.001		29.1926	10.4887	60.9959
212969	55.12	1.04741	2.999		28.9927	10.4951	60.9553
213169	55.14	1.0489	3.002		29.0033	10.51	61.0163
213369	55.48	1.04948	2.998		29.1821	10.5158	60.935
213569	55.14	1.0507	3.001		29.0033	10.5281	60.9959
213769	55.48	1.05148	3.002		29.1821	10.5359	61.0163
213969	55.08	1.05262	3.001		28.9717	10.5473	60.9959
214169	55.08	1.05262	3.001		28.9717	10.5473	60.9959
214369	55.14	1.0546	2.996		29.0033	10.5671	60.8943
214569	55.52	1.05567	2.999		29.2031	10.5779	60.9553
214769	55.84	1.05636	3.002		29.3714	10.5848	61.0163
214969	55.84	1.05636	3.002		29.3714	10.5848	61.0163
215169	55.84	1.05836	3.003		29.3714	10.6048	61.0366
215369	55.84	1.05836	3.003		29.3714	10.6048	61.0366
215569	55.84	1.06046	2.998		29.3714	10.6259	60.935
215769	55.62	1.06143	3		29.2557	10.6356	60.9756
215969	55.88	1.06254	3.002		29.3925	10.6467	61.0163
216169	55.66	1.06332	2.998		29.2768	10.6545	60.935
216369	55.96	1.06441	3		29.4346	10.6654	60.9756
216569	55.68	1.06521	3.002		29.2873	10.6734	61.0163
216769	55.96	1.06661	3		29.4346	10.6875	60.9756
216969	55.9	1.06713	3.001		29.403	10.6927	60.9959
217169	55.6	1.06874	3		29.2452	10.7088	60.9756
217369	56.12	1.06906	2.998		29.5187	10.712	60.935
217569	55.62	1.07063	3		29.2557	10.7278	60.9756
217769	56.2	1.07123	3		29.5608	10.7338	60.9756
217969	55.7	1.0723	2.998		29.2978	10.7445	60.935
218169	56.14	1.07345	2.999		29.5292	10.756	60.9553
218369	56.16	1.07414	3		29.5398	10.7629	60.9756
218569	56.14	1.07535	2.998		29.5292	10.7751	60.935
218769	56.3	1.07609	2.999		29.6134	10.7825	60.9553
218969	56.08	1.07717	2.999		29.4977	10.7933	60.9553
219169	56.34	1.07828	2.997		29.6344	10.8044	60.9146
219369	55.98	1.07921	2.998		29.4451	10.8137	60.935
219569	56.34	1.08048	3.001		29.6344	10.8265	60.9959
219769	56.38	1.08097	2.999		29.6555	10.8314	60.9553
219969	56.04	1.08259	2.999		29.4766	10.8476	60.9553
220169	56.42	1.08295	3.001		29.6765	10.8512	60.9959
220369	56.22	1.08432	3		29.5713	10.8649	60.9756
220569	56.38	1.08507	3.004		29.6555	10.8724	61.0569
220769	56.26	1.08631	2.999		29.5924	10.8849	60.9553
220969	56.72	1.08705	2.998		29.8343	10.8923	60.935
221169	56.38	1.08807	2.999		29.6555	10.9025	60.9553
221369	56.84	1.08891	3.005		29.8974	10.9109	61.0772
221569	56.84	1.08891	3.005		29.8974	10.9109	61.0772
221769	56.78	1.09093	2.998		29.8659	10.9312	60.935
221969	56.44	1.09205	2.998		29.687	10.9424	60.935
222169	56.92	1.09288	3.001		29.9395	10.9507	60.9959
222369	56.58	1.0941	3.002		29.7607	10.9629	61.0163
222569	56.68	1.09526	3.002		29.8133	10.9745	61.0163
222769	56.84	1.09591	2.996		29.8974	10.9811	60.8943
222969	56.62	1.09728	3.001		29.7817	10.9948	60.9959
223169	57.06	1.09783	2.999		30.0132	11.0003	60.9553
223369	56.56	1.0992	3		29.7502	11.014	60.9756
223569	56.94	1.09977	3		29.95	11.0197	60.9756
223769	56.48	1.10133	3		29.7081	11.0354	60.9756
223969	56.48	1.10133	3		29.7081	11.0354	60.9756
224169	56.4	1.10296	2.999		29.666	11.0517	60.9553
224369	56.84	1.10431	3.002		29.8974	11.0652	61.0163
224569	57.02	1.10474	2.999		29.9921	11.0695	60.9553
224769	56.92	1.10598	3		29.9395	11.082	60.9756
224969	56.98	1.10696	2.999		29.9711	11.0918	60.9553
225169	56.92	1.10778	3.002		29.9395	11.1	61.0163
225369	57.26	1.10896	3.002		30.1184	11.1118	61.0163
225569	56.86	1.1099	2.999		29.908	11.1212	60.9553
225769	57.1	1.11102	2.999		30.0342	11.1325	60.9553
225969	57	1.11165	3.002		29.9816	11.1388	61.0163
226169	57.02	1.11314	2.998		29.9921	11.1537	60.935
226369	57.38	1.11352	3.003		30.1815	11.1575	61.0366
226569	57.02	1.11504	3		29.9921	11.1727	60.9756
226769	57.02	1.11504	3		29.9921	11.1727	60.9756
226969	57.02	1.11674	2.999		29.9921	11.1898	60.9553
227169	57.32	1.11794	2.997		30.1499	11.2018	60.9146
227369	57.7	1.11861	2.999		30.3498	11.2085	60.9553
227569	57.24	1.11977	2.999		30.1078	11.2201	60.9553
227769	57.68	1.12071	2.998		30.3393	11.2296	60.935
227969	57.18	1.12169	2.998		30.0763	11.2394	60.935
228169	57.64	1.12243	2.999		30.3182	11.2468	60.9553
228369	57.44	1.1238	2.999		30.213	11.2605	60.9553
228569	57.7	1.12441	3.002		30.3498	11.2666	61.0163
228770	57.24	1.12587	3.002		30.1078	11.2813	61.0163
228971	57.64	1.12653	3.001		30.3182	11.2879	60.9959
229171	57.42	1.128	2.999		30.2025	11.3026	60.9553
229371	57.74	1.12839	2.998		30.3708	11.3065	60.935
229571	57.78	1.12958	2.999		30.3919	11.3184	60.9553
229771	57.9	1.13064	2.997		30.455	11.3291	60.9146
229971	57.72	1.1315	2.999		30.3603	11.3377	60.9553
230171	57.86	1.13265	2.998		30.434	11.3492	60.935
230371	57.74	1.13359	3		30.3708	11.3586	60.9756
230571	58.04	1.13469	3		30.5286	11.3696	60.9756
230771	57.66	1.13572	2.999		30.3288	11.38	60.9553
230971	58.02	1.13679	2.999		30.5181	11.3907	60.9553
231171	58.06	1.13738	2.997		30.5391	11.3966	60.9146
231371	57.94	1.13872	2.997		30.476	11.41	60.9146
231571	58.02	1.13939	3		30.5181	11.4167	60.9756
231771	57.68	1.14081	3		30.3393	11.431	60.9756
231971	57.92	1.14113	3		30.4655	11.4342	60.9756
232171	57.76	1.14298	2.999		30.3814	11.4527	60.9553
232371	58.28	1.1433	3		30.6549	11.4559	60.9756
232571	58.02	1.14439	2.999		30.5181	11.4668	60.9553
232771	58.04	1.14579	3.004		30.5286	11.4809	61.0569
232971	58.06	1.14618	2.999		30.5391	11.4848	60.9553
233171	58.04	1.14759	3		30.5286	11.4989	60.9756
233371	58.16	1.14864	2.999		30.5917	11.5094	60.9553
233571	58.4	1.14946	2.999		30.718	11.5176	60.9553
233771	58.26	1.15031	3.003		30.6443	11.5262	61.0366
233971	58.48	1.15153	2.999		30.7601	11.5384	60.9553
234171	58.16	1.15224	3.001		30.5917	11.5455	60.9959
234371	58.48	1.15333	3.001		30.7601	11.5564	60.9959
234571	58.58	1.1544	3		30.8127	11.5671	60.9756
234771	58.58	1.1544	3		30.8127	11.5671	60.9756
234971	58.68	1.15606	3.001		30.8653	11.5838	60.9959
235171	58.68	1.15606	3.001		30.8653	11.5838	60.9959
235371	58.74	1.15824	2.999		30.8968	11.6056	60.9553
235571	58.24	1.15942	3.001		30.6338	11.6174	60.9959
235771	58.78	1.16033	3		30.9179	11.6266	60.9756
235971	58.42	1.16125	2.998		30.7285	11.6358	60.935
236171	58.68	1.16236	2.999		30.8653	11.6469	60.9553
236371	58.78	1.16303	3		30.9179	11.6536	60.9756
236571	58.36	1.16437	3.003		30.6969	11.667	61.0366
236771	58.94	1.16517	3.002		31.002	11.6751	61.0163
236971	58.6	1.16619	3.002		30.8232	11.6853	61.0163
237171	58.6	1.16769	2.997		30.8232	11.7003	60.9146
237371	58.9	1.16799	3.001		30.981	11.7033	60.9959
237571	58.68	1.16936	3		30.8653	11.717	60.9756
237771	59.08	1.17032	3.003		31.0757	11.7267	61.0366
237971	58.9	1.17119	2.995		30.981	11.7354	60.874
238171	58.7	1.17236	2.998		30.8758	11.7471	60.935
238371	59.12	1.17301	2.998		31.0967	11.7536	60.935
238571	58.98	1.17416	3		31.0231	11.7651	60.9756
238771	59.1	1.17522	3.001		31.0862	11.7758	60.9959
238971	59.3	1.17604	3.002		31.1914	11.784	61.0163
239171	58.86	1.177	2.998		30.9599	11.7936	60.935
239371	59.3	1.17804	3		31.1914	11.804	60.9756
239571	58.9	1.17898	2.999		30.981	11.8134	60.9553
239771	58.8	1.18042	3		30.9284	11.8279	60.9756
239971	59.28	1.18095	3.001		31.1809	11.8332	60.9959
240171	58.82	1.18211	2.999		30.9389	11.8448	60.9553
240371	59.12	1.18331	3.001		31.0967	11.8568	60.9959
240571	59.42	1.184	3		31.2545	11.8637	60.9756
240771	59	1.18505	2.999		31.0336	11.8742	60.9553
240971	59.38	1.18622	3		31.2335	11.886	60.9756
241171	59.54	1.18676	2.997		31.3176	11.8914	60.9146
241371	58.94	1.18817	2.999		31.002	11.9055	60.9553
241571	59.26	1.18936	3.001		31.1703	11.9174	60.9959
241771	59.16	1.18989	3.002		31.1177	11.9227	61.0163
241971	59.12	1.19111	2.999		31.0967	11.935	60.9553
242171	59.54	1.19186	3.001		31.3176	11.9425	60.9959
242371	59.24	1.19297	3.001		31.1598	11.9536	60.9959
242571	59.32	1.19404	3		31.2019	11.9643	60.9756
242771	59.5	1.19517	2.996		31.2966	11.9757	60.8943
242971	59.7	1.19571	2.997		31.4018	11.9811	60.9146
243171	59.7	1.19571	2.997		31.4018	11.9811	60.9146
243371	59.86	1.19785	2.998		31.4859	12.0025	60.935
243571	59.54	1.19886	3		31.3176	12.0126	60.9756
243771	59.78	1.20008	3.002		31.4439	12.0248	61.0163
243971	59.48	1.20088	2.998		31.2861	12.0329	60.935
244171	59.8	1.20187	2.999		31.4544	12.0428	60.9553
244371	59.44	1.2029	2.997		31.265	12.0531	60.9146
244571	59.94	1.20382	2.998		31.528	12.0623	60.935
244771	59.42	1.2052	2.998		31.2545	12.0762	60.935
244971	59.88	1.20564	2.995		31.4965	12.0806	60.874
245171	59.4	1.20701	3		31.244	12.0943	60.9756
245371	59.98	1.20781	2.997		31.5491	12.1023	60.9146
245571	59.48	1.20878	2.997		31.2861	12.112	60.9146
245771	60.12	1.20976	3.002		31.6227	12.1218	61.0163
245971	59.68	1.21081	3.001		31.3913	12.1324	60.9959
246171	60.12	1.21186	2.999		31.6227	12.1429	60.9553
246371	59.66	1.21282	2.999		31.3807	12.1525	60.9553
246571	59.94	1.21352	2.999		31.528	12.1595	60.9553
246771	59.64	1.21503	2.999		31.3702	12.1746	60.9553
246971	60.08	1.21567	3.001		31.6017	12.1811	60.9959
247171	59.92	1.21693	3		31.5175	12.1937	60.9756
247371	60.06	1.21748	2.998		31.5911	12.1992	60.935
247571	59.84	1.21906	2.997		31.4754	12.215	60.9146
247771	60.12	1.21966	2.998		31.6227	12.221	60.935
247971	59.62	1.22103	3.002		31.3597	12.2348	61.0163
248171	60.18	1.22144	3		31.6543	12.2389	60.9756
248371	59.94	1.22312	2.999		31.528	12.2557	60.9553
248571	60.3	1.2235	2.999		31.7174	12.2595	60.9553
248771	60.3	1.2235	2.999		31.7174	12.2595	60.9553
248971	60.48	1.22543	3		31.8121	12.2789	60.9756
249171	60.48	1.22543	3		31.8121	12.2789	60.9756
249371	60.46	1.22744	2.995		31.8015	12.299	60.874
249571	60.24	1.22862	2.999		31.6858	12.3108	60.9553
249771	60.36	1.22947	3.001		31.7489	12.3193	60.9959
249971	60.04	1.23079	3		31.5806	12.3326	60.9756
250171	60.34	1.23178	2.998		31.7384	12.3425	60.935
250371	60.44	1.23245	2.999		31.791	12.3492	60.9553
250571	60.44	1.23375	2.998		31.791	12.3622	60.935
250771	60.48	1.23443	3		31.8121	12.369	60.9756
250971	60.08	1.23577	2.997		31.6017	12.3825	60.9146
251171	60.08	1.23577	2.997		31.6017	12.3825	60.9146
251371	60.12	1.23776	2.999		31.6227	12.4024	60.9553
251571	60.66	1.23837	3.002		31.9067	12.4085	61.0163
251771	60.26	1.23971	2.997		31.6963	12.4219	60.9146
251971	60.64	1.24048	3		31.8962	12.4297	60.9756
252171	60.26	1.24161	3		31.6963	12.441	60.9756
252371	60.74	1.24264	2.997		31.9488	12.4513	60.9146
252571	60.36	1.24347	3.002		31.7489	12.4596	61.0163
252771	60.26	1.24501	2.998		31.6963	12.4751	60.935
252971	60.26	1.24501	2.998		31.6963	12.4751	60.935
253171	60.28	1.2468	2.998		31.7069	12.493	60.935
253371	60.76	1.24723	2.999		31.9593	12.4973	60.9553
253571	60.42	1.24835	2.999		31.7805	12.5085	60.9553
253771	60.58	1.2496	3.001		31.8647	12.521	60.9959
253971	60.88	1.25049	3.002		32.0225	12.53	61.0163
254171	60.62	1.25138	2.997		31.8857	12.5389	60.9146
254371	60.44	1.25265	2.999		31.791	12.5516	60.9553
254571	60.86	1.2532	2.997		32.0119	12.5571	60.9146
254771	60.66	1.25437	3		31.9067	12.5688	60.9756
254971	60.84	1.25551	3		32.0014	12.5803	60.9756
255171	60.96	1.25626	2.999		32.0645	12.5878	60.9553
255371	60.52	1.25752	3.001		31.8331	12.6004	60.9959
255571	61.06	1.25863	3.001		32.1171	12.6115	60.9959
255771	61.12	1.25911	3		32.1487	12.6163	60.9756
255971	60.66	1.26047	3.004		31.9067	12.63	61.0569
256171	60.78	1.26173	2.998		31.9699	12.6426	60.935
256371	61.04	1.26224	2.997		32.1066	12.6477	60.9146
256571	60.62	1.26338	3		31.8857	12.6591	60.9756
256771	60.66	1.26467	3		31.9067	12.672	60.9756
256971	61.2	1.26508	3		32.1908	12.6762	60.9756
257171	61.02	1.26614	3.003		32.0961	12.6868	61.0366
257371	60.74	1.26754	3		31.9488	12.7008	60.9756
257571	61.16	1.26849	2.998		32.1697	12.7103	60.935
257771	61.24	1.26917	2.997		32.2118	12.7171	60.9146
257971	61.34	1.27023	3		32.2644	12.7278	60.9756
258171	61.34	1.27093	3.001		32.2644	12.7348	60.9959
258371	61.22	1.27227	3.001		32.2013	12.7482	60.9959
258571	61.08	1.27352	3.001		32.1276	12.7607	60.9959
258771	61.42	1.274	3.001		32.3065	12.7655	60.9959
258971	61.36	1.27512	2.998		32.2749	12.7768	60.935
259171	61.1	1.27622	2.996		32.1382	12.7878	60.8943
259371	60.92	1.27758	3.003		32.0435	12.8014	61.0366
259571	61.34	1.27833	2.999		32.2644	12.8089	60.9553
259771	61.44	1.2792	2.997		32.317	12.8176	60.9146
259971	61.24	1.28017	3		32.2118	12.8274	60.9756
260171	61.5	1.28108	3		32.3486	12.8365	60.9756
260371	61.52	1.28197	2.998		32.3591	12.8454	60.935
260571	61.14	1.2832	3.003		32.1592	12.8577	61.0366
260771	61.5	1.28398	2.998		32.3486	12.8655	60.935
260971	61.62	1.28493	3		32.4117	12.8751	60.9756
261171	61.62	1.28603	2.999		32.4117	12.8861	60.9553
261371	61.56	1.28705	2.999		32.3801	12.8963	60.9553
261571	61.28	1.28825	2.999		32.2328	12.9083	60.9553
261771	61.7	1.2893	3.001		32.4538	12.9188	60.9959
261971	61.7	1.28991	3.001		32.4538	12.9249	60.9959
262171	61.24	1.29117	3.001		32.2118	12.9376	60.9959
262371	61.66	1.29232	3.001		32.4327	12.9491	60.9959
262571	61.68	1.29291	3		32.4432	12.955	60.9756
262771	61.44	1.294	2.998		32.317	12.9659	60.935
262971	61.76	1.29548	3		32.4853	12.9808	60.9756
263171	61.84	1.29606	2.999		32.5274	12.9866	60.9553
263371	61.82	1.29686	3.001		32.5169	12.9946	60.9959
263571	61.32	1.29824	2.996		32.2539	13.0084	60.8943
263771	61.88	1.29904	3		32.5484	13.0164	60.9756
263971	61.94	1.29992	3		32.58	13.0253	60.9756
264171	61.62	1.30103	2.998		32.4117	13.0364	60.935
264371	61.88	1.30224	3		32.5484	13.0485	60.9756
264571	62.06	1.30278	2.999		32.6431	13.0539	60.9553
264771	61.54	1.30416	3.002		32.3696	13.0677	61.0163
264971	61.84	1.30516	3.003		32.5274	13.0778	61.0366
265171	62.02	1.30579	2.998		32.6221	13.0841	60.935
265371	61.68	1.30701	2.999		32.4432	13.0963	60.9553
265571	61.78	1.30818	2.999		32.4958	13.108	60.9553
265771	62.06	1.30888	3.001		32.6431	13.115	60.9959
265971	61.92	1.30993	3.002		32.5695	13.1256	61.0163
266171	61.58	1.31135	3		32.3906	13.1398	60.9756
266371	61.84	1.31226	3.002		32.5274	13.1489	61.0163
266571	62.1	1.31287	3.001		32.6642	13.155	60.9959
266771	62.02	1.31389	3.002		32.6221	13.1652	61.0163
266971	61.86	1.31495	2.998		32.5379	13.1759	60.935
267171	62	1.3161	2.998		32.6116	13.1874	60.935
267371	62.2	1.31683	3.002		32.7168	13.1947	61.0163
267571	62.1	1.31767	3.002		32.6642	13.2031	61.0163
267771	62.04	1.31899	2.999		32.6326	13.2163	60.9553
267971	62.22	1.31982	3		32.7273	13.2246	60.9756
268171	62.24	1.32092	3.002		32.7378	13.2357	61.0163
268371	61.94	1.32192	2.997		32.58	13.2457	60.9146
268571	61.92	1.32303	2.998		32.5695	13.2568	60.935
268771	62.22	1.32402	3		32.7273	13.2667	60.9756
268971	62.16	1.32474	3.002		32.6957	13.2739	61.0163
269171	61.82	1.32616	2.999		32.5169	13.2882	60.9553
269371	62.3	1.327	3.001		32.7694	13.2966	60.9959
269571	62.2	1.32763	2.999		32.7168	13.3029	60.9553
269771	61.82	1.32886	3.002		32.5169	13.3152	61.0163
269971	61.92	1.33003	2.999		32.5695	13.327	60.9553
270171	62.28	1.3309	3.001		32.7588	13.3357	60.9959
270371	62.22	1.33182	3		32.7273	13.3449	60.9756
270571	62.06	1.33278	2.998		32.6431	13.3545	60.935
270771	62.2	1.33383	3.002		32.7168	13.365	61.0163
270971	62.22	1.33502	3.001		32.7273	13.377	60.9959
271171	62.4	1.33586	2.999		32.822	13.3854	60.9553
271371	62.32	1.33679	3.001		32.7799	13.3947	60.9959
271571	62.3	1.3378	2.998		32.7694	13.4048	60.935
271771	62.12	1.33896	3		32.6747	13.4164	60.9756
271971	62.54	1.33971	3.003		32.8956	13.4239	61.0366
272171	62.28	1.3406	3.001		32.7588	13.4329	60.9959
272371	62.44	1.34175	3.001		32.843	13.4444	60.9959
272571	62.3	1.3428	2.999		32.7694	13.4549	60.9553
272771	62.38	1.34377	2.998		32.8114	13.4646	60.935
272971	62.62	1.34468	3.001		32.9377	13.4737	60.9959
273171	62.42	1.34575	3.002		32.8325	13.4845	61.0163
273371	62.48	1.34683	3.003		32.864	13.4953	61.0366
273571	62.38	1.34787	2.999		32.8114	13.5057	60.9553
273771	62.66	1.34877	2.998		32.9587	13.5147	60.935
273971	62.58	1.3496	2.998		32.9166	13.523	60.935
274171	62.64	1.35058	2.998		32.9482	13.5329	60.935
274371	62.4	1.35176	3		32.822	13.5447	60.9756
274571	62.58	1.3527	3.003		32.9166	13.5541	61.0366
274771	62.92	1.35358	2.999		33.0955	13.5629	60.9553
274971	62.78	1.35453	2.997		33.0218	13.5724	60.9146
275171	62.66	1.35547	3.001		32.9587	13.5819	60.9959
275371	62.7	1.35666	2.996		32.9798	13.5938	60.8943
275571	62.74	1.35764	2.999		33.0008	13.6036	60.9553
275771	62.8	1.35862	3		33.0324	13.6134	60.9756
275971	62.78	1.35973	3.002		33.0218	13.6245	61.0163
276171	62.96	1.36046	2.998		33.1165	13.6319	60.935
276371	62.82	1.36151	2.997		33.0429	13.6424	60.9146
276571	62.58	1.3626	3.002		32.9166	13.6533	61.0163
276771	62.7	1.36386	2.999		32.9798	13.6659	60.9553
276971	63	1.36455	3.002		33.1376	13.6728	61.0163
277171	62.88	1.36539	2.998		33.0744	13.6813	60.935
277371	62.74	1.36644	3		33.0008	13.6918	60.9756
277571	62.78	1.36783	3.001		33.0218	13.7057	60.9959
277771	63.14	1.3685	3.001		33.2112	13.7124	60.9959
277971	62.54	1.36961	2.998		32.8956	13.7235	60.935
278171	62.94	1.37067	3		33.106	13.7342	60.9756
278371	63.12	1.37141	3		33.2007	13.7416	60.9756
278571	62.72	1.37245	3		32.9903	13.752	60.9756
278771	62.78	1.37363	2.998		33.0218	13.7638	60.935
278971	63.18	1.37459	2.998		33.2322	13.7734	60.935
279171	63.14	1.3754	3.001		33.2112	13.7816	60.9959
279371	62.88	1.37639	2.996		33.0744	13.7915	60.8943
279571	62.9	1.37759	3		33.085	13.8035	60.9756
279771	63.18	1.37839	3.001		33.2322	13.8115	60.9959
279971	62.98	1.37926	2.998		33.127	13.8202	60.935
280171	62.78	1.38043	3.001		33.0218	13.832	60.9959
280371	62.94	1.38147	3		33.106	13.8424	60.9756
280571	63.14	1.3824	2.998		33.2112	13.8517	60.935
280771	63.32	1.38334	2.998		33.3059	13.8611	60.935
280971	62.9	1.38449	3.002		33.085	13.8726	61.0163
281171	63.04	1.38544	2.995		33.1586	13.8822	60.874
281371	63.28	1.38655	3.001		33.2848	13.8933	60.9959
281571	63.14	1.3873	3.002		33.2112	13.9008	61.0163
281771	62.88	1.38869	2.997		33.0744	13.9147	60.9146
281971	63.3	1.38944	2.999		33.2954	13.9222	60.9553
282171	62.78	1.39053	3		33.0218	13.9332	60.9756
282371	63.24	1.39167	3.002		33.2638	13.9446	61.0163
282571	63.4	1.39221	2.999		33.348	13.95	60.9553
282771	63.4	1.39341	3		33.348	13.962	60.9756
282971	63.5	1.39427	3.001		33.4006	13.9706	60.9959
283171	63.36	1.39532	2.998		33.3269	13.9812	60.935
283371	63.38	1.39652	2.999		33.3374	13.9932	60.9553
283571	63.5	1.39727	3		33.4006	14.0007	60.9756
283771	63.1	1.39842	2.999		33.1902	14.0122	60.9553
283971	63.38	1.39952	3.002		33.3374	14.0232	61.0163
284171	63.56	1.40015	2.999		33.4321	14.0296	60.9553
284371	63.22	1.40137	2.999		33.2533	14.0418	60.9553
284571	63.44	1.4024	2.997		33.369	14.0521	60.9146
284771	63.7	1.40331	3.001		33.5058	14.0612	60.9959
284971	63.34	1.40423	3.001		33.3164	14.0704	60.9959
285171	63.32	1.40554	2.996		33.3059	14.0836	60.8943
285371	63.68	1.40611	3		33.4952	14.0893	60.9756
285571	63.62	1.40723	3		33.4637	14.1005	60.9756
285771	63.7	1.40821	3		33.5058	14.1103	60.9756
285971	63.12	1.40941	3.002		33.2007	14.1223	61.0163
286171	63.36	1.41062	2.999		33.3269	14.1345	60.9553
286371	63.64	1.41123	3		33.4742	14.1406	60.9756
286571	63.44	1.4122	2.996		33.369	14.1503	60.8943
286771	63.14	1.4133	3		33.2112	14.1613	60.9756
286971	63.18	1.41459	3.002		33.2322	14.1742	61.0163
287171	63.66	1.41522	2.999		33.4847	14.1806	60.9553
287371	63.5	1.41618	3.001		33.4006	14.1902	60.9959
287571	63.46	1.41739	3		33.3795	14.2023	60.9756
287771	63.66	1.41812	2.997		33.4847	14.2096	60.9146
287971	63.26	1.41936	3		33.2743	14.222	60.9756
288171	63.7	1.42041	3.001		33.5058	14.2326	60.9959
288371	63.54	1.42106	2.997		33.4216	14.2391	60.9146
288571	63.66	1.42242	3.004		33.4847	14.2527	61.0569
288780	63.6	1.42304	3		33.4532	14.2589	60.9756
288981	63.5	1.42447	2.999		33.4006	14.2732	60.9553
289181	63.84	1.42506	2.996		33.5794	14.2792	60.8943
289381	63.5	1.42638	2.999		33.4006	14.2924	60.9553
289581	63.76	1.42748	2.998		33.5373	14.3034	60.935
289781	63.9	1.42804	3.005		33.6109	14.309	61.0772
289981	63.48	1.42938	3		33.39	14.3224	60.9756
290181	63.94	1.43012	3.001		33.632	14.3299	60.9959
290381	63.48	1.43128	2.996		33.39	14.3415	60.8943
290581	63.7	1.4324	3.001		33.5058	14.3527	60.9959
290781	63.66	1.43312	3		33.4847	14.3599	60.9756
290989	64	1.4343	3		33.6635	14.3717	60.9756
291189	63.86	1.43525	3		33.5899	14.3813	60.9756
291389	63.86	1.43645	3.003		33.5899	14.3933	61.0366
291589	63.7	1.43721	2.998		33.5058	14.4009	60.935
291789	63.62	1.43843	2.998		33.4637	14.4131	60.935
291989	63.68	1.43921	3.002		33.4952	14.4209	61.0163
292189	63.96	1.44031	3		33.6425	14.432	60.9756
292389	63.82	1.44116	3		33.5689	14.4405	60.9756
292589	63.68	1.44221	2.999		33.4952	14.451	60.9553
292789	63.9	1.44363	2.999		33.6109	14.4652	60.9553
292989	64.08	1.44417	3.001		33.7056	14.4706	60.9959
293189	64.04	1.44509	3.003		33.6846	14.4799	61.0366
293389	63.52	1.44627	2.996		33.4111	14.4917	60.8943
293589	63.7	1.44721	3.002		33.5058	14.5011	61.0163
293789	64.14	1.44815	2.999		33.7372	14.5105	60.9553
293989	63.78	1.44918	2.998		33.5478	14.5208	60.935
294189	64	1.4504	3.004		33.6635	14.5331	61.0569
294424	64.12	1.45146	3		33.7267	14.5437	60.9756
294625	63.9	1.45214	2.997		33.6109	14.5505	60.9146
294825	64.14	1.45325	3.003		33.7372	14.5616	61.0366
295025	64.18	1.45434	3.002		33.7582	14.5725	61.0163
295225	64.04	1.45519	3		33.6846	14.5811	60.9756
295425	64	1.4565	2.998		33.6635	14.5942	60.935
295625	64.24	1.45752	2.999		33.7898	14.6044	60.9553
295825	63.98	1.45821	3		33.653	14.6113	60.9756
296025	63.7	1.4595	3.001		33.5058	14.6242	60.9959
296226	64.12	1.46056	3.002		33.7267	14.6349	61.0163
296427	64.22	1.46112	3.001		33.7793	14.6405	60.9959
296629	64.12	1.46216	3.001		33.7267	14.6509	60.9959
296829	64.2	1.46323	3.003		33.7687	14.6616	61.0366
297029	64.2	1.46453	2.999		33.7687	14.6746	60.9553
297229	64.18	1.46514	2.999		33.7582	14.6808	60.9553
297431	64.16	1.46634	2.999		33.7477	14.6928	60.9553
297631	64.28	1.4675	3.001		33.8108	14.7044	60.9959
297831	63.98	1.46821	2.998		33.653	14.7115	60.935
298031	64.4	1.46926	2.999		33.8739	14.722	60.9553
298231	64.16	1.47014	3		33.7477	14.7309	60.9756
298431	64.2	1.47133	2.999		33.7687	14.7428	60.9553
298631	64.32	1.47259	3.002		33.8319	14.7554	61.0163
298831	64.42	1.47305	2.999		33.8845	14.76	60.9553
299031	63.88	1.47454	2.999		33.6004	14.7749	60.9553
299231	64.3	1.47549	3.001		33.8213	14.7845	60.9959
299431	64.3	1.47609	3.001		33.8213	14.7905	60.9959
299631	64.04	1.47749	2.998		33.6846	14.8045	60.935
299831	64.56	1.478	2.998		33.9581	14.8096	60.935
300031	64.1	1.47937	2.999		33.7161	14.8233	60.9553
300231	64.24	1.48032	2.998		33.7898	14.8329	60.935
300431	64.66	1.48117	2.999		34.0107	14.8414	60.9553
300631	64.1	1.48237	2.995		33.7161	14.8534	60.874
300831	64.46	1.48314	3		33.9055	14.8611	60.9756
301031	64.12	1.48406	2.996		33.7267	14.8703	60.8943
301231	64.56	1.4852	3.002		33.9581	14.8818	61.0163
301431	64.1	1.48607	2.997		33.7161	14.8905	60.9146
301631	64.04	1.48779	2.997		33.6846	14.9077	60.9146
301831	64.36	1.48817	3.001		33.8529	14.9115	60.9959
302031	64.04	1.48949	3.003		33.6846	14.9247	61.0366
302231	64.56	1.4901	3.001		33.9581	14.9309	60.9959
302431	64.18	1.49124	2.999		33.7582	14.9423	60.9553
302631	64.48	1.49233	2.999		33.916	14.9532	60.9553
302831	64.6	1.49299	3.001		33.9791	14.9598	60.9959
303031	64.36	1.49407	3		33.8529	14.9706	60.9756
303231	64.3	1.49529	3		33.8213	14.9829	60.9756
303431	64.66	1.49607	3		34.0107	14.9907	60.9756
303631	64.38	1.49717	2.997		33.8634	15.0017	60.9146
303831	64.46	1.49834	3.001		33.9055	15.0134	60.9959
304031	64.64	1.49908	3.001		34.0002	15.0208	60.9959
304231	64.42	1.50005	3.001		33.8845	15.0306	60.9959
304431	64.46	1.50124	3		33.9055	15.0425	60.9756
304631	64.7	1.50206	2.997		34.0317	15.0507	60.9146
304831	64.52	1.50312	3.003		33.9371	15.0613	61.0366
305031	64.24	1.50422	2.999		33.7898	15.0723	60.9553
305231	64.4	1.50536	3		33.8739	15.0838	60.9756
305431	64.62	1.50608	3.003		33.9897	15.091	61.0366
305631	64.56	1.5074	3		33.9581	15.1042	60.9756
305831	64.66	1.50807	3.001		34.0107	15.1109	60.9959
306031	64.5	1.50912	3.002		33.9265	15.1214	61.0163
306231	64.32	1.51039	2.999		33.8319	15.1342	60.9553
306431	64.72	1.51115	2.999		34.0423	15.1418	60.9553
306642	64.46	1.51204	3.001		33.9055	15.1507	60.9959
306843	64.1	1.51327	3.002		33.7161	15.163	61.0163
307043	64.38	1.51437	2.999		33.8634	15.174	60.9553
307243	64.66	1.51527	2.995		34.0107	15.1831	60.874
307443	64.72	1.51595	2.999		34.0423	15.1899	60.9553
307643	64.44	1.51705	3		33.895	15.2009	60.9756
307843	64.52	1.51802	3		33.9371	15.2106	60.9756
308043	64.24	1.51942	3		33.7898	15.2246	60.9756
308243	64.7	1.52025	3.003		34.0317	15.233	61.0366
308443	64.66	1.52107	3.001		34.0107	15.2412	60.9959
308643	64.34	1.52228	3.001		33.8424	15.2533	60.9959
308843	64.82	1.52321	3		34.0949	15.2626	60.9756
309043	64.78	1.52403	2.999		34.0738	15.2708	60.9553
309243	64.38	1.52517	3		33.8634	15.2823	60.9756
309443	64.72	1.52635	2.998		34.0423	15.2941	60.935
309643	64.96	1.52696	3		34.1685	15.3002	60.9756
309843	64.78	1.52803	2.999		34.0738	15.3109	60.9553
310043	64.32	1.52919	3		33.8319	15.3225	60.9756
310243	64.62	1.53028	3.001		33.9897	15.3335	60.9959
310443	64.84	1.53101	2.998		34.1054	15.3408	60.935
310643	64.72	1.53185	2.998		34.0423	15.3492	60.935
310843	64.82	1.53291	3		34.0949	15.3598	60.9756
311043	64.86	1.534	2.999		34.1159	15.3707	60.9553
311243	64.14	1.53535	3.001		33.7372	15.3843	60.9959
311443	64.64	1.53648	3.001		34.0002	15.3956	60.9959
311643	64.86	1.5372	3		34.1159	15.4028	60.9756
311843	64.84	1.53801	3.001		34.1054	15.4109	60.9959
312043	64.74	1.53914	3.002		34.0528	15.4222	61.0163
312243	64.36	1.54027	3.002		33.8529	15.4336	61.0163
312443	64.6	1.54129	3.001		33.9791	15.4438	60.9959
312643	65	1.54215	3.002		34.1895	15.4524	61.0163
312843	64.82	1.54291	3.003		34.0949	15.46	61.0366
313043	64.8	1.54412	2.999		34.0843	15.4721	60.9553
313243	64.94	1.54517	3.002		34.158	15.4827	61.0163
313443	65.1	1.54592	3.002		34.2421	15.4902	61.0163
313643	64.82	1.54691	2.999		34.0949	15.5001	60.9553
313843	64.72	1.54815	3.002		34.0423	15.5125	61.0163
314043	64.98	1.54906	3		34.179	15.5216	60.9756
314243	65.08	1.54992	2.999		34.2316	15.5303	60.9553
314443	64.62	1.55118	3.002		33.9897	15.5429	61.0163
314643	64.8	1.55232	2.999		34.0843	15.5543	60.9553
314843	65.18	1.55289	3.002		34.2842	15.56	61.0163
315043	65	1.55385	2.999		34.1895	15.5696	60.9553
315243	64.78	1.55513	3		34.0738	15.5825	60.9756
315443	64.84	1.55621	3.001		34.1054	15.5933	60.9959
315643	65.04	1.55704	3.003		34.2106	15.6016	61.0366
315843	65.18	1.55799	2.997		34.2842	15.6111	60.9146
316043	64.96	1.55896	3.001		34.1685	15.6208	60.9959
316243	64.96	1.56016	3.001		34.1685	15.6329	60.9959
316443	65.08	1.56102	3		34.2316	15.6415	60.9756
316643	65.04	1.56184	2.999		34.2106	15.6497	60.9553
316843	64.58	1.5632	3		33.9686	15.6633	60.9756
317043	64.98	1.56426	3		34.179	15.6739	60.9756
317243	65.06	1.56483	2.999		34.2211	15.6797	60.9553
317443	64.76	1.56623	3		34.0633	15.6937	60.9756
317643	65.18	1.56689	3		34.2842	15.7003	60.9756
317843	64.88	1.56789	2.998		34.1264	15.7103	60.935
318043	64.88	1.56919	2.999		34.1264	15.7233	60.9553
318243	65.28	1.56985	2.997		34.3368	15.73	60.9146
318443	65.02	1.57094	3.001		34.2001	15.7409	60.9959
318643	64.82	1.57201	2.999		34.0949	15.7516	60.9553
318843	65.18	1.57309	2.997		34.2842	15.7624	60.9146
319043	65.34	1.57373	2.999		34.3684	15.7688	60.9553
319243	64.82	1.57481	2.998		34.0949	15.7797	60.935
319443	65.02	1.57614	2.999		34.2001	15.793	60.9553
319643	65.16	1.57679	3		34.2737	15.7995	60.9756
319843	65	1.57805	2.999		34.1895	15.8121	60.9553
320043	64.86	1.5791	3		34.1159	15.8226	60.9756
320243	65.12	1.58011	2.999		34.2527	15.8328	60.9553
320444	65.24	1.58077	3		34.3158	15.8394	60.9756
320646	64.9	1.58198	3		34.1369	15.8515	60.9756
320847	65.24	1.58307	2.999		34.3158	15.8624	60.9553
321047	65.26	1.58376	2.998		34.3263	15.8693	60.935
321247	65.3	1.58474	2.999		34.3473	15.8792	60.9553
321448	65.14	1.5859	3.003		34.2632	15.8908	61.0366
321649	65.2	1.58718	3		34.2947	15.9036	60.9756
321849	65.32	1.58784	3.002		34.3579	15.9102	61.0163
322049	65.26	1.58896	3.001		34.3263	15.9214	60.9959
322249	64.98	1.58986	3.002		34.179	15.9305	61.0163
322449	65	1.59125	2.998		34.1895	15.9444	60.935
322649	65.32	1.59194	3.001		34.3579	15.9513	60.9959
322849	65.24	1.59277	3.002		34.3158	15.9596	61.0163
323049	65.16	1.59389	2.998		34.2737	15.9708	60.935
323249	65.18	1.59539	2.999		34.2842	15.9859	60.9553
323449	65.48	1.59578	2.998		34.442	15.9898	60.935
323649	64.92	1.59688	3.002		34.1475	16.0008	61.0163
323849	65.32	1.59814	3.004		34.3579	16.0134	61.0569
324049	65.44	1.5988	3		34.421	16.02	60.9756
324249	65.38	1.59972	2.998		34.3894	16.0293	60.935
324449	65.06	1.60083	2.998		34.2211	16.0404	60.935
324649	65.36	1.60192	3.001		34.3789	16.0513	60.9959
324849	65.36	1.60282	3.003		34.3789	16.0603	61.0366
325049	65.18	1.60379	3.001		34.2842	16.07	60.9959
325249	64.96	1.60486	3		34.1685	16.0808	60.9756
325449	65.2	1.60578	3		34.2947	16.09	60.9756
325649	65.26	1.60676	2.999		34.3263	16.0998	60.9553
325849	64.94	1.60787	2.999		34.158	16.1109	60.9553
326049	65.28	1.60895	3.002		34.3368	16.1217	61.0163
326249	65.36	1.60972	3		34.3789	16.1295	60.9756
326449	65.26	1.61076	3.001		34.3263	16.1399	60.9959
326649	64.98	1.61196	2.999		34.179	16.1519	60.9553
326849	65.04	1.61314	2.999		34.2106	16.1637	60.9553
327049	65.38	1.61392	3.002		34.3894	16.1715	61.0163
327249	65.44	1.6147	3.001		34.421	16.1794	60.9959
327449	65.16	1.61589	2.997		34.2737	16.1913	60.9146
327649	65.14	1.6169	3.001		34.2632	16.2014	60.9959
327849	65.28	1.61785	3.002		34.3368	16.2109	61.0163
328049	65.3	1.61884	2.998		34.3473	16.2208	60.935
328249	65.36	1.61992	3		34.3789	16.2317	60.9756
328449	65.32	1.62084	3.002		34.3579	16.2409	61.0163
328649	65.36	1.62172	3.001		34.3789	16.2497	60.9959
328849	65.28	1.62275	2.999		34.3368	16.26	60.9553
329049	65.28	1.62375	3.002		34.3368	16.27	61.0163
329249	65.3	1.62485	3		34.3473	16.2811	60.9756
329449	65	1.62595	3.001		34.1895	16.2921	60.9959
329649	65.4	1.62681	2.999		34.3999	16.3007	60.9553
329849	65.6	1.62774	3		34.5051	16.31	60.9756
330049	65.38	1.62872	3.002		34.3894	16.3198	61.0163
330249	65.54	1.62966	3		34.4736	16.3293	60.9756
330449	65.32	1.63084	3		34.3579	16.3411	60.9756
330649	65.24	1.63187	3		34.3158	16.3514	60.9756
330849	65.42	1.633	3		34.4105	16.3627	60.9756
331049	65.44	1.6339	3.001		34.421	16.3717	60.9959
331249	65.62	1.63463	2.999		34.5157	16.3791	60.9553
331449	65.22	1.63577	3.003		34.3053	16.3905	61.0366
331649	65.5	1.63707	3		34.4525	16.4035	60.9756
331849	65.36	1.63782	2.997		34.3789	16.411	60.9146
332049	65.34	1.63893	2.999		34.3684	16.4221	60.9553
332249	65.58	1.63985	2.999		34.4946	16.4314	60.9553
332449	65.44	1.6409	2.998		34.421	16.4419	60.935
332649	65.48	1.64188	2.996		34.442	16.4517	60.8943
332849	65.62	1.64263	2.998		34.5157	16.4592	60.935
333049	65.54	1.64366	3.002		34.4736	16.4695	61.0163
333249	65.56	1.64465	3.002		34.4841	16.4795	61.0163
333449	65.42	1.6459	2.997		34.4105	16.492	60.9146
333649	65.38	1.64682	3.001		34.3894	16.5012	60.9959
333849	65.44	1.6478	3.002		34.421	16.511	61.0163
334049	65.36	1.64882	3.003		34.3789	16.5212	61.0366
334249	65.38	1.64982	3		34.3894	16.5313	60.9756
334449	65.62	1.65063	3.001		34.5157	16.5394	60.9959
334649	65.74	1.65159	3		34.5788	16.549	60.9756
334849	65.7	1.65261	3		34.5577	16.5592	60.9756
335049	65.38	1.65352	2.999		34.3894	16.5683	60.9553
335249	65.66	1.65462	2.999		34.5367	16.5794	60.9553
335449	65.64	1.65553	2.998		34.5262	16.5885	60.935
335649	65.52	1.65667	3		34.4631	16.5999	60.9756
335849	65.44	1.6576	2.998		34.421	16.6092	60.935
336049	65.34	1.65873	3.002		34.3684	16.6205	61.0163
336249	65.4	1.65971	2.997		34.3999	16.6304	60.9146
336449	65.56	1.66065	3.001		34.4841	16.6398	60.9959
336649	65.64	1.66183	2.999		34.5262	16.6516	60.9553
336849	65.64	1.66283	3		34.5262	16.6616	60.9756
337049	65.68	1.66371	2.999		34.5472	16.6704	60.9553
337249	65.6	1.66474	3.001		34.5051	16.6808	60.9959
337449	65.64	1.66573	2.997		34.5262	16.6907	60.9146
337649	65.66	1.66662	3		34.5367	16.6996	60.9756
337849	65.62	1.66763	3.003		34.5157	16.7097	61.0366
338049	65.42	1.6688	2.998		34.4105	16.7214	60.935
338249	65.38	1.66972	2.997		34.3894	16.7307	60.9146
338449	65.48	1.67088	2.999		34.442	16.7423	60.9553
338649	65.7	1.6715	2.998		34.5577	16.7485	60.935
338849	65.48	1.67258	3.002		34.442	16.7593	61.0163
339049	65.44	1.6735	3.004		34.421	16.7685	61.0569
339249	65.36	1.67482	3		34.3789	16.7818	60.9756
339449	65.34	1.67573	2.999		34.3684	16.7909	60.9553
339649	65.5	1.67657	2.998		34.4525	16.7993	60.935
339849	65.6	1.67754	3.002		34.5051	16.809	61.0163
340049	65.36	1.67872	3		34.3789	16.8208	60.9756
340249	65.5	1.67977	3.002		34.4525	16.8314	61.0163
340449	65.2	1.68078	3.001		34.2947	16.8415	60.9959
340649	65.58	1.68185	2.998		34.4946	16.8522	60.935
340849	65.64	1.68273	2.999		34.5262	16.861	60.9553
341049	65.7	1.68351	2.998		34.5577	16.8688	60.935
341249	65.7	1.68481	3.001		34.5577	16.8819	60.9959
341449	65.62	1.68573	2.999		34.5157	16.8911	60.9553
341649	65.7	1.6866	2.998		34.5577	16.8998	60.935
341849	65.7	1.68751	2.999		34.5577	16.9089	60.9553
342049	65.32	1.68884	3		34.3579	16.9222	60.9756
342249	65.38	1.68962	3		34.3894	16.9301	60.9756
342449	65.56	1.69075	2.999		34.4841	16.9414	60.9553
342649	65.56	1.69175	3.002		34.4841	16.9514	61.0163
342849	65.62	1.69273	2.998		34.5157	16.9612	60.935
343049	65.5	1.69377	2.999		34.4525	16.9716	60.9553
343249	65.62	1.69463	2.999		34.5157	16.9803	60.9553
343449	65.66	1.69572	3		34.5367	16.9912	60.9756
343649	65.66	1.69652	3.003		34.5367	16.9992	61.0366
343849	65.4	1.69771	3		34.3999	17.0111	60.9756
344049	65.4	1.69871	2.996		34.3999	17.0211	60.8943
344249	65.6	1.69984	3		34.5051	17.0325	60.9756
344449	65.78	1.70068	3		34.5998	17.0409	60.9756
344649	65.64	1.70173	2.998		34.5262	17.0514	60.935
344849	65.78	1.70248	3.002		34.5998	17.0589	61.0163
345049	65.74	1.70349	2.999		34.5788	17.069	60.9553
345249	65.8	1.70467	3		34.6103	17.0809	60.9756
345449	65.74	1.70559	3.002		34.5788	17.0901	61.0163
345649	65.68	1.70661	2.999		34.5472	17.1003	60.9553
345849	65.46	1.70759	3.001		34.4315	17.1101	60.9959
346049	65.52	1.70867	2.998		34.4631	17.1209	60.935
346249	65.86	1.70965	2.999		34.6419	17.1308	60.9553
346449	65.76	1.71068	3		34.5893	17.1411	60.9756
346649	65.82	1.71146	2.999		34.6209	17.1489	60.9553
346849	65.78	1.71248	3		34.5998	17.1591	60.9756
347049	65.88	1.71354	3.001		34.6524	17.1697	60.9959
347249	65.84	1.71456	3.003		34.6314	17.18	61.0366
347449	65.5	1.71567	2.998		34.4525	17.1911	60.935
347649	65.72	1.7166	2.996		34.5683	17.2004	60.8943
347849	65.64	1.71773	3.002		34.5262	17.2117	61.0163
348049	65.76	1.71868	3		34.5893	17.2212	60.9756
348249	65.74	1.71969	3		34.5788	17.2314	60.9756
348449	65.42	1.7207	3.001		34.4105	17.2415	60.9959
348649	65.62	1.72183	3.001		34.5157	17.2528	60.9959
348849	65.62	1.72263	2.999		34.5157	17.2608	60.9553
349049	65.8	1.72357	2.999		34.6103	17.2702	60.9553
349249	65.74	1.72459	2.997		34.5788	17.2805	60.9146
349449	65.84	1.72556	2.999		34.6314	17.2902	60.9553
349649	65.68	1.72661	3		34.5472	17.3007	60.9756
349849	65.8	1.72737	2.999		34.6103	17.3083	60.9553
350049	65.68	1.72851	3.001		34.5472	17.3197	60.9959
350249	65.34	1.72983	3.001		34.3684	17.333	60.9959
350449	65.74	1.73059	2.997		34.5788	17.3406	60.9146
350649	65.82	1.73176	2.995		34.6209	17.3523	60.874
350849	65.7	1.73281	3		34.5577	17.3628	60.9756
351049	65.8	1.73347	2.998		34.6103	17.3694	60.935
351249	65.52	1.73487	3.003		34.4631	17.3835	61.0366
351449	65.78	1.73558	3.001		34.5998	17.3906	60.9959
351649	65.42	1.7368	3.003		34.4105	17.4028	61.0366
351849	65.52	1.73787	3.002		34.4631	17.4135	61.0163
352049	65.72	1.7386	2.997		34.5683	17.4208	60.9146
352249	65.86	1.73955	2.997		34.6419	17.4304	60.9146
352449	65.82	1.74056	2.999		34.6209	17.4405	60.9553
352649	65.8	1.74147	3		34.6103	17.4496	60.9756
352849	65.82	1.74256	3		34.6209	17.4605	60.9756
353049	65.64	1.74353	2.998		34.5262	17.4702	60.935
353249	65.7	1.74461	2.999		34.5577	17.4811	60.9553
353449	65.62	1.74573	3.001		34.5157	17.4923	60.9959
353649	65.72	1.7467	2.999		34.5683	17.502	60.9553
353849	65.72	1.7477	3.001		34.5683	17.512	60.9959
354049	65.8	1.74857	3.001		34.6103	17.5207	60.9959
354249	65.74	1.74939	3.002		34.5788	17.529	61.0163
354449	65.72	1.7505	3.001		34.5683	17.5401	60.9959
354649	65.64	1.75163	2.998		34.5262	17.5514	60.935
354849	65.64	1.75263	2.998		34.5262	17.5614	60.935
355049	65.62	1.75383	2.998		34.5157	17.5734	60.935
355249	65.82	1.75466	3.004		34.6209	17.5818	61.0569
355449	65.74	1.75559	3.001		34.5788	17.5911	60.9959
355649	65.72	1.7568	2.998		34.5683	17.6032	60.935
355849	65.94	1.75742	2.998		34.684	17.6094	60.935
356049	65.44	1.7585	3.002		34.421	17.6202	61.0163
356249	65.72	1.7596	3		34.5683	17.6313	60.9756
356449	65.74	1.76059	3.002		34.5788	17.6412	61.0163
356649	65.78	1.76148	3.003		34.5998	17.6501	61.0366
356849	65.78	1.76258	2.999		34.5998	17.6611	60.9553
357049	65.92	1.76333	3		34.6735	17.6686	60.9756
357249	65.76	1.76448	3		34.5893	17.6802	60.9756
357449	65.76	1.76548	3.002		34.5893	17.6902	61.0163
357649	65.86	1.76655	2.999		34.6419	17.7009	60.9553
357849	65.56	1.76755	2.998		34.4841	17.7109	60.935
358049	65.68	1.76861	3.001		34.5472	17.7215	60.9959
358249	65.9	1.76954	2.998		34.6629	17.7309	60.935
358449	65.94	1.77052	3.001		34.684	17.7407	60.9959
358649	65.82	1.77136	3		34.6209	17.7491	60.9756
358849	65.9	1.77254	2.999		34.6629	17.7609	60.9553
359049	65.92	1.77353	2.995		34.6735	17.7708	60.874
359249	65.88	1.77454	3		34.6524	17.781	60.9756
359449	65.96	1.77541	3.002		34.6945	17.7897	61.0163
359649	65.72	1.7766	2.999		34.5683	17.8016	60.9553
359849	65.72	1.7775	2.999		34.5683	17.8106	60.9553
360049	65.8	1.77867	3.002		34.6103	17.8223	61.0163
360249	65.68	1.77961	3		34.5472	17.8318	60.9756
360449	65.88	1.78064	2.998		34.6524	17.8421	60.935
360649	65.54	1.78146	2.998		34.4736	17.8503	60.935
360849	65.18	1.78269	3		34.2842	17.8626	60.9756
361049	65.64	1.78373	3.001		34.5262	17.873	60.9959
361249	65.82	1.78436	3.001		34.6209	17.8794	60.9959
361449	65.34	1.78553	3.001		34.3684	17.8911	60.9959
361649	65.6	1.78664	2.998		34.5051	17.9022	60.935
361849	65.76	1.78758	2.999		34.5893	17.9116	60.9553
362049	65.7	1.78841	3.001		34.5577	17.9199	60.9959
362249	65.6	1.78964	3.002		34.5051	17.9323	61.0163
362449	65.9	1.79054	2.998		34.6629	17.9413	60.935
362649	65.7	1.79131	3		34.5577	17.949	60.9756
362849	65.68	1.79251	2.997		34.5472	17.961	60.9146
363049	65.7	1.7936	2.999		34.5577	17.9719	60.9553
363249	65.78	1.79438	2.997		34.5998	17.9798	60.9146
363449	65.44	1.7956	3.002		34.421	17.992	61.0163
363649	65.52	1.79657	2.996		34.4631	18.0017	60.8943
363849	65.62	1.79753	3.002		34.5157	18.0113	61.0163
364049	65.84	1.79846	2.999		34.6314	18.0206	60.9553
364249	65.74	1.79959	2.999		34.5788	18.032	60.9553
364449	65.68	1.80031	3		34.5472	18.0392	60.9756
364649	65.86	1.80165	2.999		34.6419	18.0526	60.9553
364849	65.64	1.80243	3.002		34.5262	18.0604	61.0163
365049	65.58	1.80355	3		34.4946	18.0716	60.9756
365249	65.78	1.80438	3		34.5998	18.08	60.9756
365449	65.86	1.80545	3.002		34.6419	18.0907	61.0163
365649	65.38	1.80662	3.002		34.3894	18.1024	61.0163
365849	65.66	1.80752	3.002		34.5367	18.1114	61.0163
366049	65.86	1.80855	2.998		34.6419	18.1217	60.935
366249	65.74	1.80949	3.001		34.5788	18.1312	60.9959
366449	65.86	1.81025	2.998		34.6419	18.1388	60.935
366649	65.48	1.81168	3.001		34.442	18.1531	60.9959
366849	65.74	1.81269	2.998		34.5788	18.1632	60.935
367049	65.82	1.81336	3		34.6209	18.1699	60.9756
367249	65.82	1.81336	3		34.6209	18.1699	60.9756
367449	65.84	1.81556	2.999		34.6314	18.192	60.9553
367649	65.94	1.81622	3		34.684	18.1986	60.9756
367849	65.78	1.81748	3.001		34.5998	18.2112	60.9959
368049	65.86	1.81845	3.001		34.6419	18.2209	60.9959
368249	65.7	1.81941	2.998		34.5577	18.2306	60.935
368449	65.62	1.82053	2.998		34.5157	18.2418	60.935
368649	65.64	1.82163	3.001		34.5262	18.2528	60.9959
368849	65.88	1.82264	2.998		34.6524	18.2629	60.935
369049	65.88	1.82344	3.002		34.6524	18.2709	61.0163
369249	65.84	1.82426	2.999		34.6314	18.2792	60.9553
369449	65.64	1.82563	3.001		34.5262	18.2929	60.9959
369649	65.82	1.82636	3		34.6209	18.3002	60.9756
369849	65.7	1.8275	3.001		34.5577	18.3116	60.9959
370049	65.98	1.82841	3.001		34.705	18.3207	60.9959
370249	65.8	1.82947	3.001		34.6103	18.3314	60.9959
370449	65.68	1.83081	3		34.5472	18.3448	60.9756
370649	65.86	1.83145	3		34.6419	18.3512	60.9756
370849	65.52	1.83237	3.002		34.4631	18.3604	61.0163
371049	65.8	1.83347	3		34.6103	18.3714	60.9756
371249	65.92	1.83443	3		34.6735	18.3811	60.9756
371449	65.8	1.83547	3		34.6103	18.3915	60.9756
371649	65.6	1.83644	3.001		34.5051	18.4012	60.9959
371849	65.82	1.83746	3.003		34.6209	18.4114	61.0366
372049	65.42	1.8386	2.998		34.4105	18.4228	60.935
372249	65.72	1.8394	2.998		34.5683	18.4309	60.935
372449	65.78	1.84058	2.997		34.5998	18.4427	60.9146
372649	65.88	1.84144	2.999		34.6524	18.4513	60.9553
372849	65.82	1.84246	3.001		34.6209	18.4615	60.9959
373049	65.88	1.84334	3		34.6524	18.4703	60.9756
373249	65.78	1.84428	2.998		34.5998	18.4798	60.935
373449	65.84	1.84526	2.999		34.6314	18.4896	60.9553
373649	65.5	1.84658	2.999		34.4525	18.5028	60.9553
373849	65.86	1.84765	3.001		34.6419	18.5135	60.9959
374049	65.58	1.84835	3		34.4946	18.5205	60.9756
374249	65.88	1.84964	3.001		34.6524	18.5335	60.9959
374449	65.88	1.85024	2.997		34.6524	18.5395	60.9146
374649	65.56	1.85165	3.004		34.4841	18.5536	61.0569
374849	65.86	1.85255	3.003		34.6419	18.5626	61.0366
375049	65.92	1.85333	2.996		34.6735	18.5704	60.8943
375249	65.76	1.85438	3		34.5893	18.581	60.9756
375449	65.74	1.85539	2.998		34.5788	18.5911	60.935
375649	65.5	1.85678	2.997		34.4525	18.605	60.9146
375849	65.78	1.85758	3		34.5998	18.613	60.9756
376049	65.92	1.85833	2.999		34.6735	18.6205	60.9553
376249	65.92	1.85833	2.999		34.6735	18.6205	60.9553
376449	65.98	1.86031	2.998		34.705	18.6404	60.935
376649	65.88	1.86144	2.999		34.6524	18.6517	60.9553
376849	65.58	1.86255	2.999		34.4946	18.6628	60.9553
377049	65.44	1.8637	3.002		34.421	18.6743	61.0163
377249	65.98	1.86421	2.999		34.705	18.6795	60.9553
377449	65.5	1.86547	3		34.4525	18.6921	60.9756
377649	65.78	1.86668	2.999		34.5998	18.7042	60.9553
377849	65.92	1.86743	3.001		34.6735	18.7117	60.9959
378049	65.86	1.86835	3		34.6419	18.7209	60.9756
378249	65.52	1.86957	2.998		34.4631	18.7332	60.935
378449	65.76	1.87068	3		34.5893	18.7443	60.9756
378649	65.7	1.87141	3.003		34.5577	18.7516	61.0366
378849	65.68	1.87251	3		34.5472	18.7626	60.9756
379049	65.9	1.87334	2.999		34.6629	18.7709	60.9553
379249	65.54	1.87456	2.998		34.4736	18.7832	60.935
379449	65.46	1.87559	3.002		34.4315	18.7935	61.0163
379649	65.68	1.87651	2.999		34.5472	18.8027	60.9553
379849	65.84	1.87746	2.999		34.6314	18.8122	60.9553
380049	65.5	1.87847	3.001		34.4525	18.8223	60.9959
380249	65.58	1.87955	2.998		34.4946	18.8332	60.935
380449	65.9	1.88034	3		34.6629	18.8411	60.9756
380649	65.9	1.88034	3		34.6629	18.8411	60.9756
380849	65.82	1.88246	2.998		34.6209	18.8623	60.935
381049	65.74	1.88329	3		34.5788	18.8706	60.9756
381249	65.34	1.88453	3.003		34.3684	18.8831	61.0366
381449	65.52	1.88577	2.999		34.4631	18.8955	60.9553
381649	65.78	1.88618	2.999		34.5998	18.8996	60.9553
381849	65.58	1.88745	3.001		34.4946	18.9123	60.9959
382049	65.72	1.8884	3.001		34.5683	18.9218	60.9959
382249	65.74	1.88939	2.999		34.5788	18.9318	60.9553
382449	65.58	1.89065	2.997		34.4946	18.9444	60.9146
382649	65.64	1.89173	3.004		34.5262	18.9552	61.0569
382849	65.66	1.89222	3.002		34.5367	18.9601	61.0163
383049	65.74	1.89339	2.999		34.5788	18.9718	60.9553
383249	65.6	1.89444	2.999		34.5051	18.9824	60.9553
383449	65.88	1.89534	3.001		34.6524	18.9914	60.9959
383649	65.56	1.89645	2.999		34.4841	19.0025	60.9553
383849	65.84	1.89746	3		34.6314	19.0126	60.9756
384049	65.5	1.89848	2.997		34.4525	19.0228	60.9146
384249	65.74	1.89959	3.004		34.5788	19.034	61.0569
384449	65.48	1.90038	2.997		34.442	19.0419	60.9146
384649	65.6	1.90154	2.999		34.5051	19.0535	60.9553
384849	65.5	1.90227	3.002		34.4525	19.0608	61.0163
385049	65.46	1.90349	2.999		34.4315	19.073	60.9553
385249	65.64	1.90413	2.999		34.5262	19.0795	60.9553
385449	65.5	1.90568	2.997		34.4525	19.095	60.9146
385649	65.78	1.90628	3.002		34.5998	19.101	61.0163
385849	65.4	1.90741	2.998		34.3999	19.1123	60.935
386049	65.7	1.9085	3.001		34.5577	19.1232	60.9959
386249	65.86	1.90925	3.001		34.6419	19.1308	60.9959
386449	65.74	1.91049	2.999		34.5788	19.1432	60.9553
386649	65.34	1.91163	2.999		34.3684	19.1546	60.9553
386849	65.76	1.91238	2.999		34.5893	19.1621	60.9553
387049	65.24	1.91367	3		34.3158	19.1751	60.9756
387249	65.7	1.9144	3.001		34.5577	19.1824	60.9959
387449	65.62	1.91533	2.999		34.5157	19.1917	60.9553
387649	65.72	1.9165	3.002		34.5683	19.2034	61.0163
387849	65.9	1.91744	2.996		34.6629	19.2128	60.8943
388049	65.84	1.91826	2.999		34.6314	19.221	60.9553
388249	65.66	1.91932	3		34.5367	19.2317	60.9756
388449	65.56	1.92065	3		34.4841	19.245	60.9756
388649	65.82	1.92136	2.997		34.6209	19.2521	60.9146
388849	65.82	1.92136	2.997		34.6209	19.2521	60.9146
389049	65.82	1.92326	2.999		34.6209	19.2711	60.9553
389249	65.42	1.9245	3.001		34.4105	19.2836	60.9959
389449	65.86	1.92545	2.999		34.6419	19.2931	60.9553
389649	65.78	1.92618	2.999		34.5998	19.3004	60.9553
389849	65.42	1.9274	3		34.4105	19.3126	60.9756
390049	65.6	1.92854	3		34.5051	19.324	60.9756
390249	65.22	1.92947	2.999		34.3053	19.3334	60.9553
390449	65.56	1.93055	3.002		34.4841	19.3442	61.0163
390649	65.72	1.9313	3		34.5683	19.3517	60.9756
390849	65.68	1.93231	2.999		34.5472	19.3618	60.9553
391049	65.36	1.93342	3		34.3789	19.3729	60.9756
391249	65.56	1.93455	3.001		34.4841	19.3843	60.9959
391449	65.72	1.9353	2.998		34.5683	19.3918	60.935
391649	65.52	1.93637	3.002		34.4631	19.4025	61.0163
391849	65.82	1.93746	2.998		34.6209	19.4134	60.935
392049	65.64	1.93823	2.999		34.5262	19.4211	60.9553
392249	65.48	1.93958	3.003		34.442	19.4347	61.0366
392449	65.84	1.94026	3		34.6314	19.4415	60.9756
392649	65.26	1.94156	3.001		34.3263	19.4545	60.9959
392849	65.54	1.94246	2.996		34.4736	19.4635	60.8943
393049	65.7	1.94361	2.999		34.5577	19.4751	60.9553
393249	65.68	1.94421	3.001		34.5472	19.4811	60.9959
393449	65.72	1.9453	3		34.5683	19.492	60.9756
393649	65.62	1.94643	3		34.5157	19.5033	60.9756
393849	65.64	1.94743	2.999		34.5262	19.5133	60.9553
394049	65.72	1.9485	3.002		34.5683	19.524	61.0163
394249	65.64	1.94933	3		34.5262	19.5324	60.9756
394449	65.54	1.95036	3.001		34.4736	19.5427	60.9959
394649	65.48	1.95148	3		34.442	19.5539	60.9756
394849	65.6	1.95254	3.001		34.5051	19.5645	60.9959
395049	65.76	1.95328	3		34.5893	19.5719	60.9756
395249	65.6	1.95434	3		34.5051	19.5826	60.9756
395449	65.3	1.95544	2.999		34.3473	19.5936	60.9553
395649	65.78	1.95628	3.002		34.5998	19.602	61.0163
395849	65.48	1.95738	3		34.442	19.613	60.9756
396049	65.56	1.95835	3.001		34.4841	19.6227	60.9959
396249	65.62	1.95933	2.999		34.5157	19.6326	60.9553
396449	65.58	1.96045	3.003		34.4946	19.6438	61.0366
396649	65.5	1.96158	3.001		34.4525	19.6551	60.9959
396849	65.72	1.9623	3		34.5683	19.6623	60.9756
397049	65.62	1.96353	3.002		34.5157	19.6746	61.0163
397249	65.58	1.96455	3.002		34.4946	19.6849	61.0163
397449	65.64	1.96523	2.999		34.5262	19.6917	60.9553
397649	65.5	1.96637	3.001		34.4525	19.7031	60.9959
397849	65.58	1.96745	3.001		34.4946	19.7139	60.9959
398049	65.74	1.96839	3		34.5788	19.7233	60.9756
[truncated: 501 more rows]

## Sheet: A-8-6B
Time: 19:07:20,07/04/2019
diameter: 49.2	mm	height: 100	mm
Vertical 100kN force sensor (vertical force of test piece)
Control mode: force / confining pressure	waveform: slope
KN/s	Force end point: 11.720 kN	KN	confining pressure rate: 0.500	MPa/s	confining pressure end point: 6.0060	MPa
time (ms)	vertical force (KN)	vertical deformation (mm)	confining pressure (MPa)		Stress (MPa)	axial strain	transverse strain
0	0	0	0		0	0	0
200	0	-0.0002	0.003		0	-0.002	0.0609756
401	0	-0.0002	0.007		0	-0.002	0.142276
601	0.14	-0.00015	0.013		0.073639	-0.0015	0.264228
801	0.32	-0.00031	0.021		0.168318	-0.0031	0.426829
1003	0.66	-0.00123	0.032		0.347155	-0.0123	0.650407
1204	0.74	-0.00226	0.045		0.389235	-0.0226	0.914634
1405	0.96	-0.00374	0.064		0.504953	-0.0374	1.30081
1605	1.22	-0.00113	0.085		0.641711	-0.0113	1.72764
1805	1.38	0.00182	0.118		0.72587	0.0182	2.39837
2005	1.54	0.00626	0.17		0.810029	0.0626	3.45528
2206	1.72	0.0124	0.218		0.904708	0.124	4.43089
2407	1.92	0.01953	0.267		1.00991	0.1953	5.42683
2607	2.12	0.02706	0.308		1.11511	0.2706	6.26016
2807	2.34	0.03538	0.347		1.23082	0.3538	7.05285
3007	2.68	0.04456	0.386		1.40966	0.4456	7.84553
3208	2.96	0.05386	0.413		1.55694	0.5386	8.39431
3408	3.26	0.06276	0.434		1.71474	0.6276	8.82114
3609	3.34	0.07053	0.458		1.75682	0.7053	9.30894
3809	3.52	0.07617	0.488		1.8515	0.7617	9.9187
4009	3.64	0.08213	0.529		1.91461	0.8213	10.752
4211	3.82	0.08836	0.582		2.00929	0.8836	11.8293
4412	4.06	0.09488	0.682		2.13553	0.9488	13.8618
4613	4.14	0.10125	0.851		2.17761	1.0125	17.2967
4813	4.54	0.10741	1.228		2.38801	1.0741	24.9593
5013	4.82	0.11331	1.875		2.53529	1.1331	38.1098
5213	4.74	0.11614	2.274		2.49321	1.1614	46.2195
5414	5	0.11705	2.41		2.62996	1.1705	48.9837
5615	5.24	0.12207	2.76		2.7562	1.2207	56.0976
5815	5.48	0.12728	2.899		2.88244	1.2728	58.9228
6015	5.58	0.13245	2.965		2.93504	1.3245	60.2642
6215	5.74	0.13849	3.063		3.0192	1.3849	62.2561
6416	6.02	0.14489	3.168		3.16648	1.4489	64.3902
6616	6.26	0.15151	3.264		3.29272	1.5151	66.3415
6817	6.46	0.15874	3.369		3.39791	1.5874	68.4756
7017	6.8	0.16702	3.469		3.57675	1.6702	70.5081
7217	7.08	0.17562	3.569		3.72403	1.7562	72.5407
7419	6.88	0.17669	3.668		3.61883	1.7669	74.5528
7620	7.04	0.17894	3.769		3.70299	1.7894	76.6057
7821	7.56	0.18865	3.867		3.97651	1.8865	78.5976
8021	7.78	0.19608	3.968		4.09223	1.9608	80.6504
8221	7.8	0.19847	4.069		4.10274	1.9847	82.7033
8421	7.88	0.20134	4.168		4.14482	2.0134	84.7154
8622	8.2	0.20773	4.268		4.31314	2.0773	86.748
8823	8.54	0.21641	4.368		4.49198	2.1641	88.7805
9023	8.8	0.22432	4.469		4.62874	2.2432	90.8333
9223	9.06	0.23013	4.569		4.7655	2.3013	92.8659
9423	9.06	0.23173	4.669		4.7655	2.3173	94.8984
9624	9.14	0.2333	4.77		4.80758	2.333	96.9512
9824	9.36	0.23672	4.872		4.92329	2.3672	99.0244
10025	9.7	0.2435	4.97		5.10213	2.435	101.016
10225	9.92	0.25013	5.072		5.21785	2.5013	103.089
10425	10.26	0.25631	5.172		5.39669	2.5631	105.122
10627	10.32	0.25969	5.272		5.42825	2.5969	107.154
10828	10.34	0.26188	5.373		5.43877	2.6188	109.207
11029	10.58	0.2652	5.472		5.56501	2.652	111.22
11229	10.88	0.27259	5.572		5.7228	2.7259	113.252
11429	11.3	0.27894	5.67		5.94372	2.7894	115.244
11629	11.16	0.28129	5.772		5.87008	2.8129	117.317
11830	11.32	0.28344	5.873		5.95424	2.8344	119.37
12031	11.56	0.28665	5.973		6.08048	2.8665	121.402
12231	11.72	0.2911	6.006		6.16464	2.911	122.073
控制模式:围压	波形:斜坡				#VALUE!	0	0
MPa/s	终点:6.0040	MPa			#VALUE!	#VALUE!	0
时间(ms)	垂直力(KN)	垂直变形(mm)	围压(MPa)		#VALUE!	#VALUE!	#VALUE!
12391	11.98	0.29541	6.004		6.3014	2.9541	122.033
控制模式:位移	波形:斜坡				#VALUE!	0	0
mm/s	终点:3.4568	mm			#VALUE!	#VALUE!	0
时间(ms)	垂直力(KN)	垂直变形(mm)	围压(MPa)		#VALUE!	#VALUE!	#VALUE!
12422	11.96	0.29581	5.999		6.29088	2.9581	121.931
12622	11.6	0.29554	5.98		6.10152	2.9554	121.545
12823	11.78	0.29678	5.981		6.1962	2.9678	121.565
13023	11.54	0.29936	5.982		6.06996	2.9936	121.585
13223	11.54	0.29936	5.982		6.06996	2.9936	121.585
13425	11.42	0.2994	5.982		6.00684	2.994	121.585
13626	11.42	0.2994	5.982		6.00684	2.994	121.585
13826	10.54	0.30321	5.978		5.54397	3.0321	121.504
14027	10.62	0.30248	5.98		5.58604	3.0248	121.545
14227	11.94	0.30362	5.982		6.28036	3.0362	121.585
14427	12.06	0.30598	5.981		6.34347	3.0598	121.565
14628	11.02	0.30704	5.979		5.79644	3.0704	121.524
14828	10.56	0.3079	5.979		5.55449	3.079	121.524
15029	10.52	0.30782	5.977		5.53345	3.0782	121.484
15229	11.34	0.30833	5.978		5.96476	3.0833	121.504
15429	12	0.3097	5.981		6.31192	3.097	121.565
15630	12.12	0.31206	5.982		6.37503	3.1206	121.585
15830	11.54	0.31306	5.98		6.06996	3.1306	121.545
16031	10.9	0.31388	5.978		5.73332	3.1388	121.504
16231	10.52	0.31382	5.976		5.53345	3.1382	121.463
16431	11.94	0.31422	5.983		6.28036	3.1422	121.606
16633	12.38	0.31617	5.98		6.51179	3.1617	121.545
16834	12.32	0.31789	5.976		6.48023	3.1789	121.463
17034	11.64	0.31903	5.979		6.12256	3.1903	121.524
17235	11.16	0.31979	5.98		5.87008	3.1979	121.545
17435	10.94	0.31977	5.979		5.75436	3.1977	121.524
17635	11.44	0.3204	5.98		6.01736	3.204	121.545
17836	11.82	0.32136	5.98		6.21724	3.2136	121.545
18036	11.92	0.32233	5.981		6.26984	3.2233	121.565
18237	12.52	0.32352	5.979		6.58543	3.2352	121.524
18437	12.82	0.32561	5.979		6.74323	3.2561	121.524
18637	12.04	0.32689	5.979		6.33295	3.2689	121.524
18838	11.64	0.32793	5.977		6.12256	3.2793	121.484
19038	12.06	0.32828	5.977		6.34347	3.2828	121.484
19239	12.38	0.32917	5.98		6.51179	3.2917	121.545
19439	12.42	0.33015	5.98		6.53283	3.3015	121.545
19639	12.52	0.33112	5.98		6.58543	3.3112	121.545
19841	12.5	0.33212	5.981		6.57491	3.3212	121.565
20042	12.44	0.33335	5.979		6.54335	3.3335	121.524
20242	12.54	0.33431	5.978		6.59595	3.3431	121.504
20443	12.72	0.33505	5.981		6.69063	3.3505	121.565
20643	12.48	0.33633	5.981		6.56439	3.3633	121.565
20843	12.74	0.33724	5.983		6.70115	3.3724	121.606
21044	12.78	0.33803	5.981		6.72219	3.3803	121.565
21244	12.74	0.33924	5.978		6.70115	3.3924	121.504
21445	13.08	0.34002	5.983		6.87999	3.4002	121.606
21645	12.9	0.34098	5.98		6.78531	3.4098	121.545
21845	12.94	0.34207	5.98		6.80635	3.4207	121.545
22046	12.98	0.34316	5.98		6.82739	3.4316	121.545
22246	13.18	0.34409	5.978		6.93259	3.4409	121.504
22447	13.08	0.34492	5.98		6.87999	3.4492	121.545
22647	12.94	0.34597	5.981		6.80635	3.4597	121.565
22847	13.12	0.34711	5.977		6.90103	3.4711	121.484
23049	13.2	0.34808	5.983		6.94311	3.4808	121.606
23250	13.2	0.34908	5.979		6.94311	3.4908	121.524
23450	13.5	0.34957	5.978		7.1009	3.4957	121.504
23651	13.36	0.35102	5.978		7.02727	3.5102	121.504
23851	13.54	0.35186	5.98		7.12194	3.5186	121.545
24051	13.1	0.35291	5.98		6.89051	3.5291	121.545
24252	13.64	0.35373	5.98		7.17454	3.5373	121.545
24452	13.32	0.35514	5.978		7.00623	3.5514	121.504
24653	13.48	0.35568	5.977		7.09038	3.5568	121.484
24853	13.6	0.35704	5.981		7.1535	3.5704	121.565
25053	13.16	0.35789	5.979		6.92207	3.5789	121.524
25254	13.74	0.35889	5.98		7.22714	3.5889	121.545
25454	13.6	0.35974	5.979		7.1535	3.5974	121.524
25655	13.88	0.36044	5.98		7.30078	3.6044	121.545
25855	13.6	0.36204	5.98		7.1535	3.6204	121.545
26055	13.58	0.36265	5.981		7.14298	3.6265	121.565
26257	13.68	0.36431	5.98		7.19558	3.6431	121.545
26458	13.48	0.36498	5.979		7.09038	3.6498	121.524
26658	13.4	0.36571	5.979		7.04831	3.6571	121.524
26859	13.98	0.36641	5.982		7.35338	3.6641	121.585
27059	13.74	0.36789	5.981		7.22714	3.6789	121.565
27259	13.96	0.36851	5.98		7.34286	3.6851	121.545
27460	13.9	0.37013	5.978		7.3113	3.7013	121.504
27660	13.86	0.37085	5.981		7.29026	3.7085	121.565
27861	14.32	0.37149	5.98		7.53222	3.7149	121.545
28061	13.9	0.37283	5.982		7.3113	3.7283	121.585
28261	14.3	0.37359	5.98		7.5217	3.7359	121.545
28462	13.76	0.37498	5.978		7.23766	3.7498	121.504
28662	13.82	0.37576	5.977		7.26922	3.7576	121.484
28863	14.26	0.37641	5.98		7.50066	3.7641	121.545
29063	14.1	0.37786	5.983		7.4165	3.7786	121.606
29263	14.24	0.37862	5.979		7.49014	3.7862	121.524
29465	14.52	0.37962	5.98		7.63742	3.7962	121.545
29666	14.04	0.38079	5.978		7.38494	3.8079	121.504
29866	14.48	0.38133	5.981		7.61638	3.8133	121.565
30067	14.52	0.38212	5.98		7.63742	3.8212	121.545
30267	14.12	0.38326	5.98		7.42702	3.8326	121.545
30467	13.96	0.38451	5.982		7.34286	3.8451	121.585
30668	13.86	0.38615	5.982		7.29026	3.8615	121.585
30868	13.98	0.38691	5.976		7.35338	3.8691	121.463
31069	14.64	0.38788	5.98		7.70054	3.8788	121.545
31269	15.04	0.38894	5.981		7.91093	3.8894	121.565
31469	15.2	0.38868	5.981		7.99509	3.8868	121.565
31670	15.18	0.39009	5.98		7.98457	3.9009	121.545
31870	14.88	0.39209	5.98		7.82677	3.9209	121.545
32071	14.88	0.39289	5.976		7.82677	3.9289	121.463
32271	15.06	0.39413	5.98		7.92145	3.9413	121.545
32471	15.24	0.39497	5.979		8.01613	3.9497	121.524
32672	15.28	0.39605	5.98		8.03717	3.9605	121.545
32872	14.68	0.39716	5.98		7.72158	3.9716	121.545
33073	14.16	0.39784	5.979		7.44806	3.9784	121.524
33273	14.24	0.39872	5.978		7.49014	3.9872	121.504
33473	14.98	0.39986	5.977		7.87937	3.9986	121.484
33675	15.68	0.40061	5.982		8.24757	4.0061	121.585
33876	15.7	0.4013	5.981		8.25809	4.013	121.565
34076	15.6	0.40204	5.982		8.20549	4.0204	121.585
34277	15.6	0.40204	5.982		8.20549	4.0204	121.585
34477	15.4	0.40411	5.98		8.10029	4.0411	121.545
34677	15.26	0.40526	5.98		8.02665	4.0526	121.545
34878	15.6	0.40624	5.982		8.20549	4.0624	121.585
35078	15.12	0.40741	5.979		7.95301	4.0741	121.524
35279	15.6	0.40794	5.98		8.20549	4.0794	121.545
35479	15.42	0.4094	5.977		8.11081	4.094	121.484
35679	15.82	0.41006	5.981		8.32121	4.1006	121.565
35880	15.6	0.41114	5.977		8.20549	4.1114	121.484
36080	15.8	0.41237	5.979		8.31069	4.1237	121.524
36281	15.62	0.41293	5.979		8.21601	4.1293	121.524
36481	15.82	0.41446	5.982		8.32121	4.1446	121.585
36681	15.84	0.41486	5.979		8.33173	4.1486	121.524
36883	15.62	0.41603	5.982		8.21601	4.1603	121.585
37084	15.9	0.41743	5.977		8.36329	4.1743	121.484
37284	15.76	0.41808	5.982		8.28965	4.1808	121.585
37485	15.96	0.41921	5.978		8.39485	4.1921	121.504
37685	16.1	0.41986	5.983		8.46849	4.1986	121.606
37885	16.06	0.42118	5.982		8.44745	4.2118	121.585
38086	16.22	0.42182	5.979		8.53161	4.2182	121.524
38286	16.18	0.42294	5.981		8.51057	4.2294	121.565
38487	15.92	0.42433	5.978		8.37381	4.2433	121.504
38687	16.28	0.4247	5.979		8.56317	4.247	121.524
38887	16.08	0.42597	5.98		8.45797	4.2597	121.545
39088	16.22	0.42732	5.976		8.53161	4.2732	121.463
39288	16.22	0.42782	5.98		8.53161	4.2782	121.545
39489	16.4	0.42926	5.983		8.62628	4.2926	121.606
39689	16.66	0.42987	5.981		8.76304	4.2987	121.565
39889	16.26	0.43091	5.978		8.55265	4.3091	121.504
40091	16.58	0.4321	5.98		8.72096	4.321	121.545
40292	16.58	0.4328	5.981		8.72096	4.328	121.565
40492	16.36	0.43407	5.981		8.60524	4.3407	121.565
40693	16.72	0.43485	5.98		8.7946	4.3485	121.545
40893	16.62	0.43558	5.981		8.742	4.3558	121.565
41093	16.44	0.43715	5.979		8.64732	4.3715	121.524
41294	16.66	0.43797	5.982		8.76304	4.3797	121.585
41494	16.6	0.43869	5.979		8.73148	4.3869	121.524
41695	16.66	0.43987	5.981		8.76304	4.3987	121.565
41895	16.84	0.44101	5.982		8.85772	4.4101	121.585
42095	16.98	0.44156	5.979		8.93136	4.4156	121.524
42296	16.6	0.44289	5.978		8.73148	4.4289	121.504
42496	17.02	0.44354	5.98		8.9524	4.4354	121.545
42697	16.64	0.44468	5.979		8.75252	4.4468	121.524
42897	17.1	0.44591	5.979		8.99448	4.4591	121.524
43097	17.22	0.44657	5.98		9.0576	4.4657	121.545
43299	17.24	0.44757	5.981		9.06812	4.4757	121.565
43500	17.26	0.44866	5.978		9.07864	4.4866	121.504
43700	16.86	0.4496	5.98		8.86824	4.496	121.545
43901	17.2	0.45098	5.983		9.04708	4.5098	121.606
44101	17.28	0.45145	5.976		9.08916	4.5145	121.463
44301	17.22	0.45267	5.982		9.0576	4.5267	121.585
44502	17.6	0.45354	5.981		9.25748	4.5354	121.565
44702	17.48	0.45438	5.983		9.19436	4.5438	121.606
44903	17.48	0.45558	5.978		9.19436	4.5558	121.504
45103	17.54	0.45666	5.979		9.22592	4.5666	121.524
45303	17.7	0.4575	5.98		9.31007	4.575	121.545
45504	17.7	0.4583	5.981		9.31007	4.583	121.565
45704	17.46	0.45949	5.981		9.18384	4.5949	121.565
45905	17.74	0.46049	5.981		9.33111	4.6049	121.565
46105	17.34	0.46153	5.978		9.12072	4.6153	121.504
46305	17.78	0.46248	5.98		9.35215	4.6248	121.545
46507	17.82	0.46346	5.979		9.37319	4.6346	121.524
46708	17.92	0.46443	5.979		9.42579	4.6443	121.524
46908	17.94	0.46542	5.977		9.43631	4.6542	121.484
47109	17.6	0.46654	5.981		9.25748	4.6654	121.565
47309	18.2	0.46733	5.977		9.57307	4.6733	121.484
47509	17.98	0.46821	5.981		9.45735	4.6821	121.565
47710	17.78	0.46948	5.98		9.35215	4.6948	121.545
47910	18.2	0.47053	5.979		9.57307	4.7053	121.524
48111	18.22	0.47122	5.981		9.58359	4.7122	121.565
48311	18.06	0.47238	5.979		9.49943	4.7238	121.524
48511	18.08	0.47347	5.981		9.50995	4.7347	121.565
48712	18.34	0.47428	5.98		9.64671	4.7428	121.545
48912	18.02	0.47539	5.98		9.47839	4.7539	121.545
49113	18.24	0.47672	5.98		9.59411	4.7672	121.545
49313	18.22	0.47712	5.977		9.58359	4.7712	121.484
49513	17.98	0.47841	5.98		9.45735	4.7841	121.545
49715	18.36	0.47937	5.98		9.65723	4.7937	121.545
49916	18.44	0.48045	5.982		9.69931	4.8045	121.585
50116	18.42	0.48115	5.979		9.68879	4.8115	121.524
50317	18.22	0.48232	5.983		9.58359	4.8232	121.606
50517	18.7	0.48315	5.978		9.83607	4.8315	121.504
50717	18.78	0.48403	5.98		9.87815	4.8403	121.545
50918	18.48	0.48513	5.977		9.72035	4.8513	121.484
51118	18.62	0.48638	5.981		9.79399	4.8638	121.565
51319	18.88	0.48689	5.98		9.93075	4.8689	121.545
51519	18.7	0.48805	5.982		9.83607	4.8805	121.585
51719	18.72	0.48915	5.982		9.84659	4.8915	121.585
51920	18.7	0.49035	5.982		9.83607	4.9035	121.585
52120	19.12	0.49091	5.979		10.057	4.9091	121.524
52321	18.68	0.49216	5.979		9.82555	4.9216	121.524
52521	18.88	0.49329	5.98		9.93075	4.9329	121.545
52721	19.1	0.49402	5.981		10.0465	4.9402	121.565
52922	19.06	0.49503	5.978		10.0254	4.9503	121.504
53122	19.24	0.49597	5.981		10.1201	4.9597	121.565
53323	19.1	0.49692	5.978		10.0465	4.9692	121.504
53523	18.98	0.49806	5.978		9.98335	4.9806	121.504
53723	19.14	0.4994	5.981		10.0675	4.994	121.565
53925	19.34	0.49983	5.981		10.1727	4.9983	121.565
54126	19.22	0.50107	5.98		10.1096	5.0107	121.545
54326	19.14	0.5024	5.981		10.0675	5.024	121.565
54527	19.52	0.50277	5.984		10.2674	5.0277	121.626
54727	19.4	0.50381	5.977		10.2043	5.0381	121.484
54927	19.18	0.50489	5.981		10.0885	5.0489	121.565
55128	19.54	0.50616	5.98		10.2779	5.0616	121.545
55328	19.5	0.50687	5.979		10.2569	5.0687	121.524
55529	19.32	0.50814	5.981		10.1622	5.0814	121.565
55729	19.76	0.50878	5.981		10.3936	5.0878	121.565
55929	19.34	0.50983	5.981		10.1727	5.0983	121.565
56130	19.76	0.51098	5.979		10.3936	5.1098	121.524
56330	19.9	0.51164	5.98		10.4673	5.1164	121.545
56531	19.84	0.51266	5.981		10.4357	5.1266	121.565
56731	19.56	0.51385	5.98		10.2884	5.1385	121.545
56931	20.02	0.51489	5.978		10.5304	5.1489	121.504
57133	19.64	0.51573	5.976		10.3305	5.1573	121.463
57334	20.06	0.51698	5.977		10.5514	5.1698	121.484
57534	20.08	0.51757	5.981		10.5619	5.1757	121.565
57735	20.12	0.51856	5.98		10.583	5.1856	121.545
57935	19.74	0.51989	5.976		10.3831	5.1989	121.463
58135	20.08	0.52097	5.983		10.5619	5.2097	121.606
58336	20.34	0.52168	5.977		10.6987	5.2168	121.484
58536	20.14	0.52265	5.978		10.5935	5.2265	121.504
58737	20.14	0.52385	5.981		10.5935	5.2385	121.565
58937	20.26	0.52501	5.978		10.6566	5.2501	121.504
59137	20.3	0.52549	5.98		10.6777	5.2549	121.545
59338	20.16	0.52674	5.981		10.604	5.2674	121.565
59538	20.36	0.52787	5.981		10.7092	5.2787	121.565
59739	20.34	0.52848	5.98		10.6987	5.2848	121.545
59939	20.04	0.52979	5.98		10.5409	5.2979	121.545
60139	20.38	0.53087	5.981		10.7197	5.3087	121.565
60341	20.54	0.53141	5.981		10.8039	5.3141	121.565
60542	20.3	0.53259	5.981		10.6777	5.3259	121.565
60742	20.7	0.53365	5.98		10.8881	5.3365	121.545
60943	20.54	0.53481	5.982		10.8039	5.3481	121.585
61143	20.72	0.53545	5.979		10.8986	5.3545	121.524
61343	20.38	0.53667	5.979		10.7197	5.3667	121.524
61544	20.92	0.53758	5.981		11.0038	5.3758	121.565
61744	20.76	0.53833	5.98		10.9196	5.3833	121.545
61945	20.72	0.53975	5.983		10.8986	5.3975	121.606
62145	20.98	0.54026	5.98		11.0353	5.4026	121.545
62345	20.78	0.54153	5.981		10.9301	5.4153	121.565
62546	21	0.54265	5.981		11.0459	5.4265	121.565
62746	21.12	0.54321	5.98		11.109	5.4321	121.545
62947	20.88	0.54449	5.98		10.9827	5.4449	121.545
63147	21.24	0.54537	5.981		11.1721	5.4537	121.565
63347	21.06	0.54633	5.982		11.0774	5.4633	121.585
63549	21.02	0.54744	5.98		11.0564	5.4744	121.545
63750	21.32	0.54824	5.978		11.2142	5.4824	121.504
63950	20.94	0.54967	5.98		11.0143	5.4967	121.545
64151	21.36	0.55012	5.982		11.2352	5.5012	121.585
64351	21.4	0.55121	5.981		11.2562	5.5121	121.565
64551	21.12	0.55221	5.979		11.109	5.5221	121.524
64752	21.5	0.55307	5.977		11.3088	5.5307	121.484
64952	21.1	0.55441	5.981		11.0985	5.5441	121.565
65153	21.58	0.55525	5.98		11.3509	5.5525	121.545
65353	21.34	0.55633	5.983		11.2247	5.5633	121.606
65553	21.36	0.55752	5.979		11.2352	5.5752	121.524
65754	21.68	0.55801	5.979		11.4035	5.5801	121.524
65954	21.38	0.55932	5.979		11.2457	5.5932	121.524
66155	21.66	0.56042	5.982		11.393	5.6042	121.585
66355	21.76	0.56108	5.98		11.4456	5.6108	121.545
66555	21.58	0.56215	5.982		11.3509	5.6215	121.585
66757	21.66	0.56332	5.982		11.393	5.6332	121.585
66958	21.9	0.56393	5.978		11.5192	5.6393	121.504
67158	21.84	0.56516	5.98		11.4877	5.6516	121.545
67359	21.86	0.56635	5.978		11.4982	5.6635	121.504
67559	22.08	0.56687	5.981		11.6139	5.6687	121.565
67759	21.94	0.56792	5.981		11.5403	5.6792	121.565
67960	21.72	0.5692	5.976		11.4246	5.692	121.463
68160	22	0.5702	5.978		11.5718	5.702	121.504
68361	22.22	0.57092	5.979		11.6876	5.7092	121.524
68561	22.1	0.57196	5.978		11.6244	5.7196	121.504
68761	21.88	0.57304	5.98		11.5087	5.7304	121.545
68962	22.38	0.57387	5.98		11.7717	5.7387	121.545
69162	21.96	0.57501	5.978		11.5508	5.7501	121.504
69363	22.3	0.57629	5.981		11.7296	5.7629	121.565
69563	22.12	0.57696	5.979		11.635	5.7696	121.524
69763	22	0.5782	5.979		11.5718	5.782	121.524
69965	22.4	0.57896	5.979		11.7822	5.7896	121.524
70166	22.16	0.57984	5.978		11.656	5.7984	121.504
70366	22.34	0.58128	5.979		11.7507	5.8128	121.524
70567	22.24	0.58192	5.981		11.6981	5.8192	121.565
70767	22.54	0.58321	5.982		11.8559	5.8321	121.585
70967	22.52	0.58362	5.98		11.8454	5.8362	121.545
71168	22.52	0.58512	5.981		11.8454	5.8512	121.565
71368	22.72	0.58615	5.982		11.9506	5.8615	121.585
71569	22.64	0.58668	5.981		11.9085	5.8668	121.565
71769	22.48	0.58803	5.98		11.8243	5.8803	121.545
71969	22.82	0.58881	5.977		12.0032	5.8881	121.484
72170	22.64	0.58978	5.98		11.9085	5.8978	121.545
72370	22.58	0.591	5.98		11.8769	5.91	121.545
72571	22.92	0.59188	5.982		12.0558	5.9188	121.585
72771	22.88	0.59259	5.98		12.0347	5.9259	121.545
72971	22.92	0.59388	5.98		12.0558	5.9388	121.545
73172	22.8	0.59502	5.98		11.9926	5.9502	121.545
73372	23.22	0.59557	5.981		12.2136	5.9557	121.565
73573	22.88	0.59669	5.981		12.0347	5.9669	121.565
73773	22.9	0.59798	5.98		12.0452	5.9798	121.545
73973	23.24	0.59857	5.976		12.2241	5.9857	121.463
74175	22.84	0.59981	5.979		12.0137	5.9981	121.524
74376	23.3	0.60074	5.978		12.2556	6.0074	121.504
74576	23.34	0.60173	5.982		12.2767	6.0173	121.585
74777	23.06	0.60293	5.979		12.1294	6.0293	121.524
74977	23.4	0.60361	5.98		12.3082	6.0361	121.545
75177	23.2	0.60468	5.981		12.203	6.0468	121.565
75378	23.44	0.6056	5.982		12.3293	6.056	121.585
75578	23.46	0.60649	5.982		12.3398	6.0649	121.585
75779	23.32	0.60774	5.977		12.2662	6.0774	121.484
75979	23.4	0.60891	5.982		12.3082	6.0891	121.585
76179	23.54	0.60946	5.978		12.3819	6.0946	121.504
76380	23.28	0.61085	5.979		12.2451	6.1085	121.524
76580	23.8	0.61137	5.981		12.5186	6.1137	121.565
76781	23.42	0.6126	5.979		12.3188	6.126	121.524
76981	23.56	0.61365	5.978		12.3924	6.1365	121.504
77181	23.56	0.61465	5.983		12.3924	6.1465	121.606
77383	23.58	0.61575	5.979		12.4029	6.1575	121.524
77584	23.96	0.61621	5.983		12.6028	6.1621	121.606
77784	23.6	0.61774	5.98		12.4134	6.1774	121.545
77985	23.92	0.61873	5.979		12.5818	6.1873	121.524
78185	24	0.6195	5.98		12.6238	6.195	121.545
78385	23.92	0.62053	5.981		12.5818	6.2053	121.565
78586	23.82	0.62176	5.98		12.5292	6.2176	121.545
78786	24.12	0.62246	5.982		12.6869	6.2246	121.585
78987	23.98	0.62331	5.981		12.6133	6.2331	121.565
79187	23.92	0.62473	5.978		12.5818	6.2473	121.504
79387	24.18	0.62544	5.981		12.7185	6.2544	121.565
79588	24.06	0.62648	5.981		12.6554	6.2648	121.565
79788	24	0.6277	5.982		12.6238	6.277	121.585
79989	24.26	0.62821	5.981		12.7606	6.2821	121.565
80189	24.04	0.62969	5.979		12.6449	6.2969	121.524
80389	24.26	0.63021	5.98		12.7606	6.3021	121.545
80591	24.4	0.63156	5.981		12.8342	6.3156	121.565
80792	24.52	0.63212	5.984		12.8973	6.3212	121.626
80992	24.36	0.63317	5.978		12.8132	6.3317	121.504
81193	24.32	0.63439	5.979		12.7921	6.3439	121.524
81393	24.44	0.63555	5.98		12.8553	6.3555	121.545
81593	24.56	0.6363	5.977		12.9184	6.363	121.484
81794	24.54	0.63721	5.98		12.9079	6.3721	121.545
81994	24.48	0.63853	5.981		12.8763	6.3853	121.565
82195	24.86	0.6391	5.979		13.0762	6.391	121.524
82395	24.74	0.64004	5.983		13.0131	6.4004	121.606
82595	24.44	0.64145	5.979		12.8553	6.4145	121.524
82796	24.96	0.64206	5.981		13.1288	6.4206	121.565
82996	24.82	0.64311	5.983		13.0551	6.4311	121.606
83197	24.76	0.64423	5.977		13.0236	6.4423	121.484
83397	25.04	0.64544	5.981		13.1709	6.4544	121.565
83597	24.92	0.64608	5.981		13.1077	6.4608	121.565
83799	24.9	0.64728	5.983		13.0972	6.4728	121.606
84000	25.26	0.64806	5.979		13.2866	6.4806	121.524
84200	24.86	0.6491	5.982		13.0762	6.491	121.585
84401	25.1	0.65031	5.982		13.2024	6.5031	121.585
84601	25.12	0.65101	5.978		13.2129	6.5101	121.504
84801	24.8	0.65222	5.979		13.0446	6.5222	121.524
85002	25.34	0.65313	5.979		13.3287	6.5313	121.524
85202	25.04	0.65404	5.982		13.1709	6.5404	121.585
85403	25.46	0.65509	5.979		13.3918	6.5509	121.524
85603	25.12	0.65601	5.981		13.2129	6.5601	121.565
85803	25.48	0.65708	5.981		13.4023	6.5708	121.565
86004	25.56	0.65805	5.981		13.4444	6.5805	121.565
86204	25.56	0.65885	5.98		13.4444	6.5885	121.545
86405	25.32	0.65994	5.98		13.3181	6.5994	121.545
86605	25.56	0.66105	5.981		13.4444	6.6105	121.565
86805	25.56	0.66205	5.975		13.4444	6.6205	121.443
87007	25.76	0.66318	5.98		13.5496	6.6318	121.545
87208	25.66	0.66382	5.979		13.497	6.6382	121.524
87408	25.76	0.66488	5.976		13.5496	6.6488	121.463
87609	25.96	0.66581	5.979		13.6548	6.6581	121.524
87809	25.96	0.66581	5.979		13.6548	6.6581	121.524
88009	25.96	0.66811	5.98		13.6548	6.6811	121.545
88210	25.76	0.66878	5.981		13.5496	6.6878	121.565
88410	25.7	0.6701	5.979		13.518	6.701	121.524
88611	25.94	0.67072	5.979		13.6443	6.7072	121.524
88811	25.64	0.67203	5.979		13.4865	6.7203	121.524
89011	26.2	0.67293	5.981		13.781	6.7293	121.565
89212	25.88	0.67374	5.98		13.6127	6.7374	121.545
89412	26.18	0.67504	5.979		13.7705	6.7504	121.524
89613	26.12	0.67566	5.98		13.7389	6.7566	121.545
89813	26.18	0.67704	5.978		13.7705	6.7704	121.504
90013	26.42	0.67755	5.981		13.8967	6.7755	121.565
90215	26.14	0.67865	5.98		13.7495	6.7865	121.545
90416	26.46	0.67974	5.981		13.9178	6.7974	121.565
90616	26.5	0.68052	5.983		13.9388	6.8052	121.606
90817	26.22	0.68192	5.978		13.7915	6.8192	121.504
91017	26.7	0.68265	5.982		14.044	6.8265	121.585
91217	26.32	0.68379	5.978		13.8441	6.8379	121.504
91418	26.36	0.68477	5.979		13.8652	6.8477	121.524
91618	26.74	0.68554	5.978		14.0651	6.8554	121.504
91819	26.44	0.68665	5.979		13.9073	6.8665	121.524
92019	26.92	0.68738	5.98		14.1597	6.8738	121.545
92219	26.42	0.68865	5.978		13.8967	6.8865	121.504
92420	26.84	0.68981	5.981		14.1177	6.8981	121.565
92620	26.92	0.69038	5.978		14.1597	6.9038	121.504
92821	26.52	0.69182	5.981		13.9493	6.9182	121.565
93021	27.08	0.69242	5.98		14.2439	6.9242	121.545
93221	26.88	0.69339	5.976		14.1387	6.9339	121.463
93422	26.84	0.69471	5.979		14.1177	6.9471	121.524
93622	27.3	0.69524	5.98		14.3596	6.9524	121.545
93823	26.76	0.69643	5.983		14.0756	6.9643	121.606
94023	27.24	0.69727	5.979		14.328	6.9727	121.524
94223	27.02	0.69854	5.982		14.2123	6.9854	121.585
94425	27.24	0.69957	5.978		14.328	6.9957	121.504
94626	27.26	0.70026	5.978		14.3386	7.0026	121.504
94826	27.32	0.70164	5.979		14.3701	7.0164	121.524
95027	27.24	0.70237	5.979		14.328	7.0237	121.524
95227	27.08	0.70362	5.98		14.2439	7.0362	121.545
95427	27.38	0.70422	5.981		14.4017	7.0422	121.565
95628	27.54	0.70526	5.981		14.4858	7.0526	121.565
95828	27.4	0.70631	5.979		14.4122	7.0631	121.524
96029	27.36	0.70732	5.98		14.3912	7.0732	121.545
96229	27.54	0.70846	5.979		14.4858	7.0846	121.524
96429	27.58	0.70905	5.979		14.5069	7.0905	121.524
96630	27.2	0.71058	5.98		14.307	7.1058	121.545
96830	27.88	0.71114	5.98		14.6647	7.1114	121.545
97031	27.42	0.7124	5.98		14.4227	7.124	121.545
97231	27.94	0.71322	5.978		14.6962	7.1322	121.504
97431	27.72	0.7142	5.981		14.5805	7.142	121.565
97633	27.76	0.71538	5.977		14.6016	7.1538	121.484
97834	28	0.7163	5.979		14.7278	7.163	121.524
98034	27.86	0.71715	5.98		14.6542	7.1715	121.545
98235	27.8	0.71847	5.98		14.6226	7.1847	121.545
98435	28.16	0.71904	5.979		14.812	7.1904	121.524
98635	27.74	0.72039	5.978		14.591	7.2039	121.504
98836	28.2	0.72103	5.98		14.833	7.2103	121.545
99036	28	0.7221	5.981		14.7278	7.221	121.565
99237	27.96	0.72331	5.982		14.7068	7.2331	121.585
99437	28.32	0.72389	5.978		14.8961	7.2389	121.504
99637	28.14	0.72515	5.979		14.8014	7.2515	121.524
99838	28.28	0.7263	5.981		14.8751	7.263	121.565
100038	28.16	0.72704	5.979		14.812	7.2704	121.524
100239	28.16	0.72844	5.983		14.812	7.2844	121.606
100439	28.5	0.72902	5.979		14.9908	7.2902	121.524
100639	28.44	0.73015	5.98		14.9592	7.3015	121.545
100841	28.42	0.73125	5.98		14.9487	7.3125	121.545
101042	28.54	0.73231	5.979		15.0118	7.3231	121.524
101242	28.28	0.733	5.982		14.8751	7.33	121.585
101443	28.7	0.73395	5.975		15.096	7.3395	121.443
101643	28.32	0.73509	5.983		14.8961	7.3509	121.606
101843	28.76	0.73583	5.977		15.1276	7.3583	121.484
102044	28.58	0.7369	5.982		15.0329	7.369	121.585
102244	28.8	0.73822	5.981		15.1486	7.3822	121.565
102445	28.66	0.73877	5.981		15.075	7.3877	121.565
102645	28.62	0.74008	5.978		15.0539	7.4008	121.504
102845	29	0.74075	5.982		15.2538	7.4075	121.585
103046	29	0.74075	5.982		15.2538	7.4075	121.585
103246	28.98	0.74296	5.981		15.2433	7.4296	121.565
103447	29.04	0.74364	5.98		15.2748	7.4364	121.545
103647	28.82	0.74501	5.98		15.1591	7.4501	121.545
103847	29.14	0.7459	5.98		15.3274	7.459	121.545
104049	29.26	0.74706	5.98		15.3906	7.4706	121.545
104250	29.06	0.74773	5.984		15.2854	7.4773	121.626
104450	29.24	0.74917	5.977		15.38	7.4917	121.484
104651	29.1	0.74971	5.98		15.3064	7.4971	121.545
104851	29.16	0.75079	5.978		15.338	7.5079	121.504
105051	29.1	0.75201	5.978		15.3064	7.5201	121.504
105252	29.5	0.75247	5.979		15.5168	7.5247	121.524
105452	29.12	0.75391	5.978		15.3169	7.5391	121.504
105653	29.76	0.75478	5.981		15.6535	7.5478	121.565
105853	29.26	0.75586	5.98		15.3906	7.5586	121.545
106053	29.6	0.75654	5.978		15.5694	7.5654	121.504
106254	29.44	0.7577	5.978		15.4852	7.577	121.504
106454	29.8	0.75887	5.978		15.6746	7.5887	121.504
106655	29.64	0.75953	5.982		15.5904	7.5953	121.585
106855	29.98	0.76051	5.982		15.7693	7.6051	121.585
107055	29.56	0.76155	5.976		15.5484	7.6155	121.463
107257	30.02	0.76259	5.979		15.7903	7.6259	121.524
107458	29.86	0.76345	5.979		15.7061	7.6345	121.524
107658	29.74	0.76479	5.981		15.643	7.6479	121.565
107859	30.08	0.76537	5.98		15.8219	7.6537	121.545
108059	29.8	0.76657	5.98		15.6746	7.6657	121.545
108259	29.9	0.76783	5.98		15.7272	7.6783	121.545
108460	29.94	0.76842	5.98		15.7482	7.6842	121.545
108660	30.08	0.76957	5.98		15.8219	7.6957	121.545
108861	30.02	0.77049	5.979		15.7903	7.7049	121.524
109061	30.38	0.77137	5.977		15.9797	7.7137	121.484
109261	30.4	0.77226	5.981		15.9902	7.7226	121.565
109462	30.36	0.77317	5.981		15.9691	7.7317	121.565
109662	30.02	0.77449	5.977		15.7903	7.7449	121.484
109863	30.4	0.77536	5.977		15.9902	7.7536	121.484
110063	30.34	0.77658	5.978		15.9586	7.7658	121.504
110263	30.48	0.77713	5.981		16.0323	7.7713	121.565
110465	30.16	0.77864	5.982		15.8639	7.7864	121.585
110666	30.56	0.7793	5.979		16.0743	7.793	121.524
110866	30.1	0.78046	5.98		15.8324	7.8046	121.545
111067	30.38	0.78167	5.982		15.9797	7.8167	121.585
111267	30.56	0.7822	5.979		16.0743	7.822	121.524
111467	30.34	0.78368	5.98		15.9586	7.8368	121.545
111668	30.68	0.78436	5.981		16.1375	7.8436	121.565
111868	30.76	0.78543	5.979		16.1795	7.8543	121.524
112069	30.54	0.78651	5.981		16.0638	7.8651	121.565
112269	30.86	0.7872	5.979		16.2321	7.872	121.524
112469	30.46	0.78844	5.98		16.0217	7.8844	121.545
112670	30.96	0.78956	5.98		16.2847	7.8956	121.545
112870	30.64	0.79028	5.982		16.1164	7.9028	121.585
113071	30.8	0.79142	5.978		16.2006	7.9142	121.504
113271	31.08	0.79232	5.981		16.3479	7.9232	121.565
113471	30.88	0.79309	5.981		16.2427	7.9309	121.565
113672	30.84	0.79441	5.977		16.2216	7.9441	121.484
113872	31.14	0.7951	5.981		16.3794	7.951	121.565
114073	30.94	0.79617	5.98		16.2742	7.9617	121.545
114273	31.16	0.79739	5.98		16.3899	7.9739	121.545
114473	31.04	0.79804	5.982		16.3268	7.9804	121.585
114675	31.26	0.79926	5.977		16.4425	7.9926	121.484
114876	31.36	0.80022	5.982		16.4951	8.0022	121.585
115076	31.56	0.80095	5.98		16.6003	8.0095	121.545
115277	31.22	0.80207	5.981		16.4215	8.0207	121.565
115477	31.36	0.80342	5.981		16.4951	8.0342	121.565
115677	31.36	0.80402	5.982		16.4951	8.0402	121.585
115878	31.36	0.80532	5.982		16.4951	8.0532	121.585
116078	31.36	0.80592	5.978		16.4951	8.0592	121.504
116279	31.56	0.80715	5.983		16.6003	8.0715	121.606
116479	31.64	0.80833	5.977		16.6424	8.0833	121.484
116679	31.58	0.80895	5.98		16.6109	8.0895	121.545
116880	31.82	0.81026	5.979		16.7371	8.1026	121.524
117080	31.62	0.81093	5.979		16.6319	8.1093	121.524
117354	31.82	0.81226	5.976		16.7371	8.1226	121.463
117555	31.8	0.81327	5.982		16.7266	8.1327	121.585
117757	31.92	0.81443	5.981		16.7897	8.1443	121.565
117958	32.02	0.81549	5.981		16.8423	8.1549	121.565
118158	31.96	0.81621	5.981		16.8107	8.1621	121.565
118359	32.02	0.81749	5.977		16.8423	8.1749	121.484
118559	32.1	0.81816	5.983		16.8844	8.1816	121.606
118759	32.02	0.81919	5.979		16.8423	8.1919	121.524
118960	31.84	0.82066	5.977		16.7476	8.2066	121.484
119160	32.1	0.82096	5.979		16.8844	8.2096	121.524
119361	32.02	0.82239	5.98		16.8423	8.2239	121.545
119561	32.38	0.82297	5.978		17.0317	8.2297	121.504
119761	32.16	0.82414	5.982		16.9159	8.2414	121.585
119962	32	0.8253	5.98		16.8318	8.253	121.545
120162	32.28	0.8264	5.98		16.9791	8.264	121.545
120363	32.48	0.82703	5.982		17.0843	8.2703	121.585
120563	32.48	0.82703	5.982		17.0843	8.2703	121.585
120763	32.52	0.82902	5.977		17.1053	8.2902	121.484
120965	32.32	0.83019	5.979		17.0001	8.3019	121.524
121166	32.32	0.83139	5.98		17.0001	8.3139	121.545
121366	32.66	0.83187	5.981		17.1789	8.3187	121.565
121567	32.26	0.83331	5.978		16.9685	8.3331	121.504
121767	32.7	0.83395	5.979		17.2	8.3395	121.524
121967	32.22	0.83532	5.98		16.9475	8.3532	121.545
122168	32.74	0.83614	5.981		17.221	8.3614	121.565
122368	32.84	0.83711	5.98		17.2736	8.3711	121.545
122569	32.74	0.83794	5.98		17.221	8.3794	121.545
122769	32.82	0.83901	5.978		17.2631	8.3901	121.504
122969	33.06	0.84023	5.982		17.3893	8.4023	121.585
123170	32.94	0.84097	5.978		17.3262	8.4097	121.504
123370	32.74	0.84214	5.98		17.221	8.4214	121.545
123571	33.2	0.84288	5.981		17.463	8.4288	121.565
123771	32.84	0.84391	5.981		17.2736	8.4391	121.565
123971	33.24	0.84517	5.982		17.484	8.4517	121.585
124180	33.2	0.84578	5.98		17.463	8.4578	121.545
124380	33.16	0.84729	5.977		17.4419	8.4729	121.484
124580	33.04	0.84794	5.98		17.3788	8.4794	121.545
124781	33.36	0.84902	5.98		17.5471	8.4902	121.545
124981	33.46	0.84979	5.977		17.5997	8.4979	121.484
125181	33.4	0.85111	5.98		17.5682	8.5111	121.545
125383	33.58	0.85165	5.98		17.6628	8.5165	121.545
125585	33.52	0.85287	5.979		17.6313	8.5287	121.524
125786	33.34	0.85383	5.978		17.5366	8.5383	121.504
125987	33.46	0.85509	5.976		17.5997	8.5509	121.463
126187	33.54	0.85566	5.98		17.6418	8.5566	121.545
126387	33.34	0.85703	5.979		17.5366	8.5703	121.524
126588	33.78	0.85768	5.979		17.768	8.5768	121.524
126788	33.54	0.85876	5.979		17.6418	8.5876	121.524
126989	33.66	0.86012	5.979		17.7049	8.6012	121.524
127189	33.52	0.86087	5.98		17.6313	8.6087	121.545
127389	33.92	0.86183	5.98		17.8417	8.6183	121.545
127591	34.04	0.86279	5.977		17.9048	8.6279	121.484
127792	33.68	0.86381	5.981		17.7154	8.6381	121.565
127992	33.98	0.86501	5.98		17.8732	8.6501	121.545
128193	34.04	0.86539	5.98		17.9048	8.6539	121.545
128393	34	0.8668	5.977		17.8838	8.668	121.484
128593	34.1	0.86786	5.979		17.9364	8.6786	121.524
128794	34.1	0.86847	5.98		17.9364	8.6847	121.545
128994	34.38	0.86987	5.98		18.0836	8.6987	121.545
129195	34.2	0.87053	5.98		17.989	8.7053	121.545
129395	34.06	0.87198	5.979		17.9153	8.7198	121.524
129595	34.42	0.87225	5.977		18.1047	8.7225	121.484
129796	34.34	0.87358	5.98		18.0626	8.7358	121.545
129996	34.38	0.87467	5.978		18.0836	8.7467	121.504
130197	34.56	0.8756	5.979		18.1783	8.756	121.524
130397	34.54	0.87641	5.978		18.1678	8.7641	121.504
130597	34.6	0.87739	5.977		18.1994	8.7739	121.484
130799	34.64	0.87838	5.982		18.2204	8.7838	121.585
131000	34.52	0.87942	5.979		18.1573	8.7942	121.524
131200	34.38	0.88067	5.978		18.0836	8.8067	121.504
131401	34.76	0.88133	5.982		18.2835	8.8133	121.585
131601	34.46	0.88254	5.978		18.1257	8.8254	121.504
131801	34.78	0.88373	5.98		18.294	8.8373	121.545
132002	34.58	0.8844	5.98		18.1888	8.844	121.545
132202	35.06	0.88523	5.981		18.4413	8.8523	121.565
132403	34.7	0.88645	5.98		18.252	8.8645	121.545
132603	34.76	0.88763	5.979		18.2835	8.8763	121.524
132803	34.98	0.88846	5.979		18.3992	8.8846	121.524
133004	35.14	0.8894	5.976		18.4834	8.894	121.463
133204	35.26	0.89006	5.98		18.5465	8.9006	121.545
133405	34.9	0.89138	5.979		18.3572	8.9138	121.524
133605	35.3	0.89235	5.98		18.5676	8.9235	121.545
133805	34.98	0.89336	5.981		18.3992	8.9336	121.565
134007	35.14	0.8947	5.981		18.4834	8.947	121.565
134208	35.28	0.89515	5.981		18.557	8.9515	121.565
134408	35.24	0.89627	5.979		18.536	8.9627	121.524
134609	35.4	0.89701	5.977		18.6201	8.9701	121.484
134809	35.24	0.89827	5.978		18.536	8.9827	121.504
135009	35.48	0.89938	5.981		18.6622	8.9938	121.565
135210	35.72	0.8999	5.98		18.7885	8.999	121.545
135410	35.44	0.9011	5.981		18.6412	9.011	121.565
135611	35.44	0.9023	5.98		18.6412	9.023	121.545
135811	35.54	0.90346	5.977		18.6938	9.0346	121.484
136011	35.8	0.90407	5.98		18.8305	9.0407	121.545
136212	35.6	0.90504	5.979		18.7253	9.0504	121.524
136412	35.54	0.90636	5.979		18.6938	9.0636	121.524
136613	35.82	0.90746	5.978		18.8411	9.0746	121.504
136813	35.8	0.90797	5.978		18.8305	9.0797	121.504
137013	35.5	0.90957	5.976		18.6727	9.0957	121.463
137215	35.9	0.90983	5.98		18.8831	9.0983	121.545
137416	35.6	0.91134	5.98		18.7253	9.1134	121.545
137616	36.08	0.91187	5.982		18.9778	9.1187	121.585
137817	35.74	0.91339	5.977		18.799	9.1339	121.484
138017	36.08	0.91417	5.981		18.9778	9.1417	121.565
138217	36.2	0.91493	5.979		19.0409	9.1493	121.524
138418	35.94	0.91602	5.981		18.9042	9.1602	121.565
138618	36.4	0.91686	5.979		19.1461	9.1686	121.524
138819	36.12	0.91796	5.982		18.9989	9.1796	121.585
139019	36.18	0.91914	5.98		19.0304	9.1914	121.545
139219	36.5	0.91982	5.981		19.1987	9.1982	121.565
139420	36.12	0.92096	5.979		18.9989	9.2096	121.524
139620	36.6	0.92199	5.977		19.2513	9.2199	121.484
139821	36.6	0.92199	5.977		19.2513	9.2199	121.484
140021	36.56	0.9237	5.981		19.2303	9.237	121.565
140221	36.32	0.92509	5.979		19.1041	9.2509	121.524
140422	36.92	0.92578	5.98		19.4197	9.2578	121.545
140622	36.42	0.92695	5.977		19.1567	9.2695	121.484
140823	36.76	0.92793	5.98		19.3355	9.2793	121.545
141023	37	0.92885	5.98		19.4617	9.2885	121.545
141223	36.72	0.92975	5.981		19.3145	9.2975	121.565
141425	36.86	0.9309	5.979		19.3881	9.309	121.524
141626	37.1	0.93161	5.98		19.5143	9.3161	121.545
141826	36.72	0.93285	5.98		19.3145	9.3285	121.545
142027	37.22	0.93357	5.982		19.5775	9.3357	121.585
142227	36.94	0.93477	5.98		19.4302	9.3477	121.545
142427	37.04	0.93604	5.978		19.4828	9.3604	121.504
142628	37.2	0.93648	5.981		19.5669	9.3648	121.565
142828	36.96	0.93766	5.98		19.4407	9.3766	121.545
143029	37.48	0.93858	5.979		19.7142	9.3858	121.524
143229	37.12	0.93971	5.978		19.5249	9.3971	121.504
143429	37.44	0.9408	5.98		19.6932	9.408	121.545
143630	37.06	0.94163	5.976		19.4933	9.4163	121.463
143830	37.36	0.94262	5.982		19.6511	9.4262	121.585
144031	37.42	0.9436	5.978		19.6827	9.436	121.504
144231	37.58	0.94475	5.978		19.7668	9.4475	121.504
144431	37.82	0.94526	5.979		19.8931	9.4526	121.524
144633	37.38	0.94672	5.982		19.6616	9.4672	121.585
144834	37.82	0.94736	5.982		19.8931	9.4736	121.585
145034	37.64	0.94863	5.98		19.7984	9.4863	121.545
145235	38.02	0.94959	5.981		19.9983	9.4959	121.565
145435	37.66	0.95042	5.981		19.8089	9.5042	121.565
145635	37.92	0.95173	5.977		19.9457	9.5173	121.484
145836	37.86	0.95235	5.979		19.9141	9.5235	121.524
146036	37.88	0.95334	5.979		19.9246	9.5334	121.524
146237	37.94	0.95442	5.977		19.9562	9.5442	121.484
146437	38.06	0.95558	5.981		20.0193	9.5558	121.565
146637	38.08	0.95617	5.981		20.0298	9.5617	121.565
146838	38.12	0.95736	5.982		20.0509	9.5736	121.585
147038	38.24	0.95842	5.979		20.114	9.5842	121.524
147239	38.1	0.95946	5.979		20.0403	9.5946	121.524
147439	38.46	0.96024	5.98		20.2297	9.6024	121.545
147639	38.46	0.96024	5.98		20.2297	9.6024	121.545
147841	38.6	0.96229	5.98		20.3033	9.6229	121.545
148042	38.44	0.96305	5.983		20.2192	9.6305	121.606
148242	38.28	0.9647	5.978		20.135	9.647	121.504
148443	38.5	0.96502	5.976		20.2507	9.6502	121.463
148643	38.32	0.96649	5.98		20.156	9.6649	121.545
148843	38.74	0.96704	5.98		20.377	9.6704	121.545
149044	38.6	0.96829	5.982		20.3033	9.6829	121.585
149244	38.82	0.96911	5.98		20.419	9.6911	121.545
149445	38.76	0.97013	5.981		20.3875	9.7013	121.565
149645	38.68	0.97116	5.982		20.3454	9.7116	121.585
149845	38.9	0.97218	5.98		20.4611	9.7218	121.545
150046	38.66	0.97307	5.979		20.3349	9.7307	121.524
150246	38.74	0.97414	5.98		20.377	9.7414	121.545
150447	38.94	0.97527	5.983		20.4822	9.7527	121.606
150647	39.04	0.97594	5.98		20.5348	9.7594	121.545
150847	39.02	0.97694	5.979		20.5242	9.7694	121.524
151049	38.94	0.97817	5.981		20.4822	9.7817	121.565
151250	39.1	0.97881	5.978		20.5663	9.7881	121.504
151450	39.06	0.98023	5.98		20.5453	9.8023	121.545
151651	39.08	0.98122	5.979		20.5558	9.8122	121.524
151851	39.3	0.98194	5.98		20.6715	9.8194	121.545
152051	38.94	0.98307	5.981		20.4822	9.8307	121.565
152252	39.34	0.98393	5.978		20.6926	9.8393	121.504
152452	39.06	0.98493	5.978		20.5453	9.8493	121.504
152653	39.14	0.9864	5.983		20.5874	9.864	121.606
152853	39.24	0.98677	5.978		20.64	9.8677	121.504
153053	39.32	0.98824	5.979		20.682	9.8824	121.524
153254	39.32	0.98884	5.98		20.682	9.8884	121.545
153454	39.18	0.99029	5.977		20.6084	9.9029	121.484
153655	39.7	0.9907	5.981		20.8819	9.907	121.565
153855	39.44	0.9921	5.981		20.7452	9.921	121.565
154055	39.8	0.99287	5.975		20.9345	9.9287	121.443
154257	39.8	0.99287	5.975		20.9345	9.9287	121.443
154458	39.92	0.99483	5.983		20.9976	9.9483	121.606
154658	39.74	0.99579	5.977		20.903	9.9579	121.484
154859	39.94	0.99702	5.978		21.0082	9.9702	121.504
155059	39.7	0.99771	5.978		20.8819	9.9771	121.504
155259	39.9	0.99914	5.981		20.9871	9.9914	121.565
155460	39.46	0.99989	5.979		20.7557	9.9989	121.524
155660	39.46	0.99989	5.979		20.7557	9.9989	121.524
155861	39.54	1.00196	5.979		20.7978	10.0196	121.524
156061	40.14	1.00265	5.979		21.1134	10.0265	121.524
156261	39.74	1.00379	5.98		20.903	10.0379	121.545
156462	40.12	1.00496	5.98		21.1028	10.0496	121.545
156662	40.18	1.00544	5.981		21.1344	10.0544	121.565
156863	39.82	1.00696	5.981		20.945	10.0696	121.565
157063	40.28	1.0075	5.982		21.187	10.075	121.585
157263	40.06	1.00888	5.981		21.0713	10.0888	121.565
157465	40.42	1.00945	5.98		21.2606	10.0945	121.545
157666	40.22	1.01082	5.981		21.1554	10.1082	121.565
157866	40.5	1.01172	5.981		21.3027	10.1172	121.565
158067	40.58	1.0128	5.978		21.3448	10.128	121.504
158267	40.38	1.01357	5.979		21.2396	10.1357	121.524
158467	40.54	1.01481	5.982		21.3238	10.1481	121.585
158668	40.78	1.01543	5.981		21.45	10.1543	121.565
158868	40.78	1.01543	5.981		21.45	10.1543	121.565
159069	40.88	1.01749	5.975		21.5026	10.1749	121.443
159269	40.58	1.0185	5.981		21.3448	10.185	121.565
159469	40.76	1.01983	5.981		21.4395	10.1983	121.565
159670	40.9	1.02068	5.982		21.5131	10.2068	121.585
159870	41	1.02135	5.981		21.5657	10.2135	121.565
160071	40.5	1.02282	5.979		21.3027	10.2282	121.524
160271	41	1.02335	5.98		21.5657	10.2335	121.545
160471	40.84	1.02451	5.979		21.4816	10.2451	121.524
160672	41.08	1.02572	5.978		21.6078	10.2572	121.504
160872	41.06	1.02623	5.982		21.5973	10.2623	121.585
161073	41.06	1.02743	5.981		21.5973	10.2743	121.565
161273	41.12	1.02831	5.979		21.6288	10.2831	121.524
161473	40.86	1.0297	5.98		21.4921	10.297	121.545
161675	41.26	1.03016	5.978		21.7025	10.3016	121.504
161876	41.16	1.03149	5.98		21.6499	10.3149	121.545
162076	41.38	1.03212	5.977		21.7656	10.3212	121.484
162277	41.02	1.03374	5.98		21.5762	10.3374	121.545
162477	41.4	1.03421	5.982		21.7761	10.3421	121.585
162677	41.38	1.03542	5.98		21.7656	10.3542	121.545
162878	41.4	1.03651	5.978		21.7761	10.3651	121.504
163078	41.58	1.03715	5.979		21.8708	10.3715	121.524
163279	41.28	1.03845	5.982		21.713	10.3845	121.585
163479	41.66	1.03902	5.981		21.9129	10.3902	121.565
163679	41.56	1.04045	5.982		21.8603	10.4045	121.585
163880	41.48	1.04128	5.979		21.8182	10.4128	121.524
164080	41.98	1.04201	5.982		22.0812	10.4201	121.585
164281	41.66	1.04322	5.979		21.9129	10.4322	121.524
164481	42	1.0441	5.98		22.0917	10.441	121.545
164681	41.7	1.0453	5.981		21.9339	10.453	121.565
164883	42.26	1.04601	5.98		22.2285	10.4601	121.545
165084	41.92	1.04713	5.978		22.0496	10.4713	121.504
165284	41.76	1.04828	5.978		21.9655	10.4828	121.504
165485	41.76	1.04828	5.978		21.9655	10.4828	121.504
165685	41.62	1.05023	5.976		21.8918	10.5023	121.463
165885	42.3	1.05089	5.982		22.2495	10.5089	121.585
166086	41.98	1.05231	5.978		22.0812	10.5231	121.504
166286	42.44	1.05295	5.98		22.3231	10.5295	121.545
166487	42.04	1.05409	5.98		22.1127	10.5409	121.545
166687	42.48	1.05513	5.982		22.3442	10.5513	121.585
166887	42.36	1.05587	5.977		22.2811	10.5587	121.484
167088	42.38	1.05707	5.98		22.2916	10.5707	121.545
167288	42.64	1.05778	5.98		22.4283	10.5778	121.545
167489	42.64	1.05778	5.98		22.4283	10.5778	121.545
167689	42.72	1.05975	5.977		22.4704	10.5975	121.484
167889	42.28	1.061	5.979		22.239	10.61	121.524
168091	42.82	1.06201	5.977		22.523	10.6201	121.484
168292	42.34	1.06298	5.98		22.2705	10.6298	121.545
168492	42.92	1.06388	5.979		22.5756	10.6388	121.524
168693	42.48	1.06483	5.979		22.3442	10.6483	121.524
168893	42.78	1.06603	5.978		22.502	10.6603	121.504
169093	43.04	1.06664	5.982		22.6387	10.6664	121.585
169294	42.98	1.06766	5.978		22.6072	10.6766	121.504
169494	42.88	1.06909	5.978		22.5546	10.6909	121.504
169695	43.1	1.06962	5.984		22.6703	10.6962	121.626
169895	42.74	1.07094	5.977		22.4809	10.7094	121.484
170095	43.22	1.07147	5.978		22.7334	10.7147	121.504
170296	42.76	1.07303	5.978		22.4915	10.7303	121.504
170496	43.28	1.07355	5.979		22.765	10.7355	121.524
170697	43.02	1.07494	5.98		22.6282	10.7494	121.545
170897	43.5	1.07577	5.98		22.8807	10.7577	121.545
171097	43.28	1.07655	5.982		22.765	10.7655	121.585
171299	43.26	1.07816	5.978		22.7545	10.7816	121.504
171500	43.4	1.07851	5.981		22.8281	10.7851	121.565
171700	43.14	1.0799	5.982		22.6913	10.799	121.585
171901	43.6	1.08044	5.982		22.9333	10.8044	121.585
172101	43.34	1.08173	5.977		22.7965	10.8173	121.484
172301	43.78	1.08238	5.978		23.028	10.8238	121.504
172502	43.52	1.08387	5.981		22.8912	10.8387	121.565
172702	43.76	1.08438	5.98		23.0175	10.8438	121.545
172903	43.4	1.08581	5.976		22.8281	10.8581	121.463
173103	43.92	1.08643	5.981		23.1016	10.8643	121.565
173303	43.54	1.08796	5.975		22.9017	10.8796	121.443
173504	43.74	1.08859	5.98		23.0069	10.8859	121.545
173704	44.02	1.08979	5.978		23.1542	10.8979	121.504
173905	43.82	1.09046	5.98		23.049	10.9046	121.545
174105	44.1	1.09167	5.977		23.1963	10.9167	121.484
174305	43.72	1.0927	5.977		22.9964	10.927	121.484
174507	44.14	1.09355	5.98		23.2173	10.9355	121.545
174708	44.12	1.09416	5.98		23.2068	10.9416	121.545
174908	44.02	1.09569	5.98		23.1542	10.9569	121.545
175109	44.24	1.09622	5.977		23.2699	10.9622	121.484
175309	44.06	1.09778	5.982		23.1752	10.9778	121.585
175509	44.36	1.09817	5.98		23.333	10.9817	121.545
175710	43.96	1.09951	5.976		23.1226	10.9951	121.463
175910	44.46	1.10044	5.982		23.3856	11.0044	121.585
176111	44.5	1.10122	5.98		23.4067	11.0122	121.545
176311	44.3	1.1023	5.981		23.3015	11.023	121.565
176511	44.46	1.10354	5.981		23.3856	11.0354	121.565
176712	44.4	1.10426	5.979		23.3541	11.0426	121.524
176912	44.28	1.1055	5.981		23.291	11.055	121.565
177113	44.52	1.10642	5.981		23.4172	11.0642	121.565
177313	44.52	1.10762	5.978		23.4172	11.0762	121.504
177513	44.76	1.10803	5.979		23.5434	11.0803	121.524
177715	44.7	1.10955	5.98		23.5119	11.0955	121.545
177916	44.64	1.11028	5.978		23.4803	11.1028	121.504
178116	45.16	1.11109	5.98		23.7538	11.1109	121.545
178317	44.7	1.11225	5.978		23.5119	11.1225	121.504
178517	44.72	1.11355	5.978		23.5224	11.1355	121.504
178717	45.04	1.11404	5.983		23.6907	11.1404	121.606
178918	45.02	1.11534	5.982		23.6802	11.1534	121.585
179118	44.98	1.11606	5.976		23.6592	11.1606	121.463
179319	45.02	1.11744	5.982		23.6802	11.1744	121.585
179519	44.98	1.11806	5.978		23.6592	11.1806	121.504
179719	45.26	1.11916	5.981		23.8064	11.1916	121.565
179920	45.36	1.11982	5.979		23.859	11.1982	121.524
180120	45.06	1.12133	5.982		23.7012	11.2133	121.585
180321	45.46	1.12179	5.98		23.9116	11.2179	121.545
180521	45.4	1.12301	5.981		23.8801	11.2301	121.565
180721	45.28	1.12405	5.982		23.817	11.2405	121.585
180922	45.58	1.12525	5.979		23.9748	11.2525	121.524
181122	45.16	1.12609	5.98		23.7538	11.2609	121.545
181323	45.82	1.12696	5.98		24.101	11.2696	121.545
181523	45.32	1.12814	5.979		23.838	11.2814	121.524
181723	45.76	1.12868	5.981		24.0694	11.2868	121.565
181925	45.5	1.13007	5.978		23.9327	11.3007	121.504
182126	45.98	1.13081	5.978		24.1852	11.3081	121.504
182326	45.64	1.13193	5.981		24.0063	11.3193	121.565
182527	45.82	1.13326	5.98		24.101	11.3326	121.545
182727	45.46	1.13399	5.979		23.9116	11.3399	121.524
182927	46.18	1.13504	5.979		24.2904	11.3504	121.524
183128	46.08	1.13577	5.978		24.2378	11.3577	121.504
183328	45.9	1.13714	5.979		24.1431	11.3714	121.524
183529	46.2	1.13803	5.978		24.3009	11.3803	121.504
183729	46.26	1.13861	5.983		24.3324	11.3861	121.606
183929	45.78	1.14008	5.981		24.08	11.4008	121.565
184130	46.26	1.14071	5.981		24.3324	11.4071	121.565
184330	45.92	1.14193	5.981		24.1536	11.4193	121.565
184531	45.92	1.14193	5.981		24.1536	11.4193	121.565
184731	45.98	1.14371	5.979		24.1852	11.4371	121.524
184931	46.52	1.14472	5.98		24.4692	11.4472	121.545
185133	46.12	1.14576	5.98		24.2588	11.4576	121.545
185334	46.46	1.14684	5.979		24.4376	11.4684	121.524
185534	46.56	1.1477	5.98		24.4902	11.477	121.545
185735	46.32	1.14889	5.977		24.364	11.4889	121.484
185935	46.48	1.14983	5.98		24.4482	11.4983	121.545
186135	46.88	1.15059	5.984		24.6585	11.5059	121.626
186336	46.52	1.15162	5.979		24.4692	11.5162	121.524
186536	46.66	1.15277	5.982		24.5428	11.5277	121.585
186737	47.04	1.15334	5.98		24.7427	11.5334	121.545
186937	47.04	1.15334	5.98		24.7427	11.5334	121.545
187137	47.14	1.1554	5.98		24.7953	11.554	121.545
187338	47.1	1.15641	5.98		24.7743	11.5641	121.545
187538	46.84	1.15761	5.98		24.6375	11.5761	121.545
187739	47.18	1.15859	5.98		24.8163	11.5859	121.545
187939	47.1	1.15942	5.978		24.7743	11.5942	121.504
188139	46.94	1.16057	5.979		24.6901	11.6057	121.524
188341	47.46	1.16129	5.979		24.9636	11.6129	121.524
188542	47.3	1.16225	5.977		24.8795	11.6225	121.484
188963	47.26	1.16466	5.98		24.8584	11.6466	121.545
189164	47.2	1.16528	5.979		24.8269	11.6528	121.524
189365	47.1	1.16682	5.977		24.7743	11.6682	121.484
189565	47.5	1.16747	5.98		24.9847	11.6747	121.545
189765	47.5	1.16747	5.98		24.9847	11.6747	121.545
189965	47.66	1.16922	5.981		25.0688	11.6922	121.565
190166	47.32	1.17064	5.979		24.89	11.7064	121.524
190366	47.58	1.17135	5.979		25.0267	11.7135	121.524
190567	47.3	1.17245	5.979		24.8795	11.7245	121.524
190767	47.56	1.17365	5.979		25.0162	11.7365	121.524
190967	47.78	1.17428	5.983		25.1319	11.7428	121.606
191168	47.4	1.17551	5.978		24.9321	11.7551	121.504
191368	47.9	1.17643	5.98		25.1951	11.7643	121.545
191569	47.64	1.17733	5.98		25.0583	11.7733	121.545
191769	47.9	1.17853	5.979		25.1951	11.7853	121.524
191969	47.78	1.17928	5.981		25.1319	11.7928	121.565
192170	47.82	1.18056	5.979		25.153	11.8056	121.524
192370	48.04	1.18109	5.978		25.2687	11.8109	121.504
192571	47.9	1.18253	5.978		25.1951	11.8253	121.504
192771	48.04	1.18349	5.981		25.2687	11.8349	121.565
192971	48.14	1.18405	5.98		25.3213	11.8405	121.545
193172	47.94	1.18542	5.978		25.2161	11.8542	121.504
193372	48.4	1.18616	5.979		25.4581	11.8616	121.524
193573	48.4	1.18616	5.979		25.4581	11.8616	121.524
193775	48.44	1.18815	5.98		25.4791	11.8815	121.545
193975	47.96	1.18941	5.979		25.2266	11.8941	121.524
194175	48.56	1.1903	5.981		25.5422	11.903	121.565
194376	48.08	1.19127	5.98		25.2897	11.9127	121.545
194576	48.52	1.19182	5.98		25.5212	11.9182	121.545
194777	48.42	1.19325	5.982		25.4686	11.9325	121.585
194977	48.54	1.19431	5.981		25.5317	11.9431	121.565
195177	48.7	1.19485	5.98		25.6159	11.9485	121.545
195378	48.44	1.19615	5.978		25.4791	11.9615	121.504
195578	48.78	1.19733	5.98		25.6579	11.9733	121.545
195779	48.74	1.19814	5.981		25.6369	11.9814	121.565
195979	49.02	1.19894	5.983		25.7842	11.9894	121.606
196179	48.52	1.20032	5.979		25.5212	12.0032	121.524
196380	49.16	1.20089	5.978		25.8578	12.0089	121.504
196580	49	1.20195	5.98		25.7737	12.0195	121.545
196781	48.68	1.20296	5.981		25.6053	12.0296	121.565
196981	48.96	1.20406	5.979		25.7526	12.0406	121.524
197181	49.04	1.20514	5.98		25.7947	12.0514	121.545
197383	49.24	1.20577	5.98		25.8999	12.0577	121.545
197584	48.74	1.20704	5.98		25.6369	12.0704	121.545
197784	48.74	1.20704	5.98		25.6369	12.0704	121.545
197985	48.78	1.20903	5.981		25.6579	12.0903	121.565
198185	48.78	1.20903	5.981		25.6579	12.0903	121.565
198385	48.68	1.21116	5.978		25.6053	12.1116	121.504
198586	49.46	1.21189	5.98		26.0156	12.1189	121.545
198786	49.2	1.21288	5.978		25.8789	12.1288	121.504
198987	49.4	1.21401	5.982		25.9841	12.1401	121.585
199187	49.64	1.21473	5.978		26.1103	12.1473	121.504
199387	49.14	1.216	5.982		25.8473	12.16	121.585
199588	49.68	1.21661	5.98		26.1313	12.1661	121.545
199788	49.4	1.21781	5.979		25.9841	12.1781	121.524
199989	49.72	1.2189	5.981		26.1524	12.189	121.565
200189	49.56	1.21965	5.976		26.0682	12.1965	121.463
200389	49.48	1.22098	5.982		26.0261	12.2098	121.585
200591	49.84	1.22146	5.981		26.2155	12.2146	121.565
200792	49.66	1.22312	5.981		26.1208	12.2312	121.565
200992	49.82	1.22366	5.977		26.205	12.2366	121.484
201193	49.8	1.22487	5.982		26.1944	12.2487	121.585
201393	50.02	1.22559	5.981		26.3102	12.2559	121.565
201593	50.18	1.22654	5.982		26.3943	12.2654	121.585
201794	49.98	1.22751	5.981		26.2891	12.2751	121.565
201994	50.1	1.22897	5.978		26.3522	12.2897	121.504
202195	50.26	1.22951	5.983		26.4364	12.2951	121.606
202395	50	1.2308	5.98		26.2996	12.308	121.545
202595	50.34	1.23158	5.981		26.4785	12.3158	121.565
202796	50.46	1.23234	5.978		26.5416	12.3234	121.504
202996	49.98	1.23371	5.978		26.2891	12.3371	121.504
203197	50.5	1.23432	5.979		26.5626	12.3432	121.524
203397	50.4	1.23546	5.978		26.51	12.3546	121.504
203597	50.46	1.23664	5.98		26.5416	12.3664	121.545
203799	50.54	1.23731	5.98		26.5837	12.3731	121.545
204000	50.24	1.23862	5.981		26.4259	12.3862	121.565
204200	50.7	1.23935	5.978		26.6678	12.3935	121.504
204401	50.24	1.24072	5.982		26.4259	12.4072	121.585
204601	50.78	1.24153	5.979		26.7099	12.4153	121.524
204801	50.28	1.2425	5.982		26.4469	12.425	121.585
205002	50.88	1.24339	5.98		26.7625	12.4339	121.545
205202	50.5	1.24442	5.982		26.5626	12.4442	121.585
205403	50.72	1.24575	5.982		26.6784	12.4575	121.585
205603	50.76	1.24623	5.982		26.6994	12.4623	121.585
205803	50.86	1.2475	5.979		26.752	12.475	121.524
206004	50.96	1.24836	5.981		26.8046	12.4836	121.565
206204	50.56	1.2495	5.98		26.5942	12.495	121.545
206405	51.16	1.25019	5.979		26.9098	12.5019	121.524
206605	50.8	1.25132	5.979		26.7204	12.5132	121.524
206805	51.2	1.25228	5.98		26.9308	12.5228	121.545
207007	51.08	1.25312	5.978		26.8677	12.5312	121.504
207208	51.4	1.25441	5.979		27.036	12.5441	121.524
207408	51.02	1.25524	5.978		26.8362	12.5524	121.504
207609	51.02	1.25524	5.978		26.8362	12.5524	121.504
207809	50.9	1.25749	5.979		26.773	12.5749	121.524
208009	51.48	1.25808	5.98		27.0781	12.5808	121.545
208210	51.02	1.25944	5.981		26.8362	12.5944	121.565
208410	51.58	1.26025	5.98		27.1307	12.6025	121.545
208611	51.38	1.26112	5.977		27.0255	12.6112	121.484
208811	51.06	1.26243	5.982		26.8572	12.6243	121.585
209011	51.66	1.26322	5.981		27.1728	12.6322	121.565
209212	51.32	1.26434	5.98		26.994	12.6434	121.545
209412	51.4	1.26551	5.977		27.036	12.6551	121.484
209613	51.8	1.26617	5.982		27.2464	12.6617	121.585
209813	51.44	1.2672	5.978		27.0571	12.672	121.504
210013	51.94	1.26792	5.977		27.3201	12.6792	121.484
210215	51.48	1.26928	5.977		27.0781	12.6928	121.484
210445	51.8	1.27037	5.982		27.2464	12.7037	121.585
210645	52.16	1.27094	5.978		27.4358	12.7094	121.504
210845	51.86	1.27225	5.979		27.278	12.7225	121.524
211046	52.06	1.27338	5.979		27.3832	12.7338	121.524
211246	52.12	1.27396	5.98		27.4148	12.7396	121.545
211447	52.04	1.27519	5.978		27.3727	12.7519	121.504
211647	52.06	1.27638	5.98		27.3832	12.7638	121.545
211847	52.16	1.27694	5.979		27.4358	12.7694	121.524
212049	51.94	1.27832	5.98		27.3201	12.7832	121.545
212250	52.34	1.27928	5.977		27.5305	12.7928	121.484
212450	52.3	1.28	5.98		27.5094	12.8	121.545
212651	51.9	1.28133	5.979		27.299	12.8133	121.524
212851	52.46	1.28214	5.982		27.5936	12.8214	121.585
213051	52.46	1.28304	5.982		27.5936	12.8304	121.585
213252	52.5	1.28402	5.977		27.6146	12.8402	121.484
213557	52.42	1.28595	5.981		27.5725	12.8595	121.565
213757	52.5	1.28642	5.981		27.6146	12.8642	121.565
213958	52.24	1.28762	5.981		27.4779	12.8762	121.565
214158	52.8	1.28862	5.981		27.7724	12.8862	121.565
214359	52.48	1.28953	5.98		27.6041	12.8953	121.545
214559	52.68	1.29066	5.981		27.7093	12.9066	121.565
214759	52.88	1.29119	5.978		27.8145	12.9119	121.504
214960	52.44	1.29275	5.981		27.5831	12.9275	121.565
215160	52.86	1.2932	5.981		27.804	12.932	121.565
215361	52.56	1.2945	5.979		27.6462	12.945	121.524
215561	53.06	1.29543	5.98		27.9092	12.9543	121.545
215761	52.64	1.29638	5.98		27.6883	12.9638	121.545
215962	53.12	1.29731	5.982		27.9407	12.9731	121.585
216162	53.16	1.29819	5.981		27.9618	12.9819	121.565
216363	52.64	1.29938	5.978		27.6883	12.9938	121.504
216563	52.96	1.30066	5.985		27.8566	13.0066	121.646
216764	53.02	1.30114	5.979		27.8881	13.0114	121.524
216965	53.24	1.30257	5.981		28.0039	13.0257	121.565
217166	53.04	1.30324	5.979		27.8987	13.0324	121.524
217366	53.18	1.30439	5.981		27.9723	13.0439	121.565
217567	53.2	1.30548	5.977		27.9828	13.0548	121.484
217767	53.5	1.30617	5.982		28.1406	13.0617	121.585
217967	53.32	1.30724	5.983		28.0459	13.0724	121.606
218168	53.14	1.3084	5.979		27.9513	13.084	121.524
218368	53.6	1.30904	5.977		28.1932	13.0904	121.484
218569	53.32	1.31034	5.983		28.0459	13.1034	121.606
218769	53.6	1.31134	5.978		28.1932	13.1134	121.504
218969	53.3	1.31235	5.982		28.0354	13.1235	121.585
219170	53.68	1.31291	5.978		28.2353	13.1291	121.504
219370	53.28	1.31455	5.981		28.0249	13.1455	121.565
219571	53.48	1.31508	5.981		28.1301	13.1508	121.565
219771	53.36	1.31632	5.978		28.067	13.1632	121.504
219971	53.82	1.31716	5.978		28.3089	13.1716	121.504
220172	53.58	1.31805	5.979		28.1827	13.1805	121.524
220372	53.74	1.31939	5.981		28.2669	13.1939	121.565
220573	53.56	1.32015	5.98		28.1722	13.2015	121.545
220773	53.88	1.32124	5.978		28.3405	13.2124	121.504
220973	53.74	1.32209	5.98		28.2669	13.2209	121.545
221175	53.96	1.32331	5.978		28.3826	13.2331	121.504
221376	54.04	1.32389	5.981		28.4247	13.2389	121.565
221576	53.88	1.32504	5.98		28.3405	13.2504	121.545
221777	54.18	1.32614	5.977		28.4983	13.2614	121.484
221977	54.08	1.32697	5.98		28.4457	13.2697	121.545
222177	54.04	1.32819	5.98		28.4247	13.2819	121.545
222378	54.34	1.32898	5.982		28.5825	13.2898	121.585
222579	53.92	1.33013	5.979		28.3615	13.3013	121.524
222779	54.42	1.33095	5.981		28.6245	13.3095	121.565
222979	54.32	1.33189	5.981		28.5719	13.3189	121.565
223179	54.16	1.33294	5.979		28.4878	13.3294	121.524
223380	54.42	1.33425	5.981		28.6245	13.3425	121.565
223580	54.36	1.33487	5.981		28.593	13.3487	121.565
223781	54.42	1.33585	5.976		28.6245	13.3585	121.463
223981	54.52	1.33712	5.98		28.6771	13.3712	121.545
224181	54.44	1.33785	5.979		28.6351	13.3785	121.524
224383	54.66	1.33917	5.983		28.7508	13.3917	121.606
224584	54.2	1.33993	5.978		28.5088	13.3993	121.504
224784	54.8	1.34092	5.979		28.8244	13.4092	121.524
224985	54.9	1.34159	5.98		28.877	13.4159	121.545
225185	54.44	1.34305	5.98		28.6351	13.4305	121.545
225385	54.98	1.34366	5.978		28.9191	13.4366	121.504
225586	54.54	1.34491	5.979		28.6877	13.4491	121.524
225786	55	1.34585	5.981		28.9296	13.4585	121.565
225987	55.02	1.34664	5.977		28.9401	13.4664	121.484
226187	54.98	1.34776	5.98		28.9191	13.4776	121.545
226387	54.84	1.34861	5.982		28.8455	13.4861	121.585
226588	55.06	1.35003	5.978		28.9612	13.5003	121.504
226788	54.86	1.3506	5.981		28.856	13.506	121.565
226989	55.36	1.35172	5.979		29.119	13.5172	121.524
227189	55.36	1.35172	5.979		29.119	13.5172	121.524
227389	55.38	1.35352	5.981		29.1295	13.5352	121.565
227591	55.38	1.35352	5.981		29.1295	13.5352	121.565
227792	55.38	1.35562	5.979		29.1295	13.5562	121.524
227992	55.02	1.35664	5.981		28.9401	13.5664	121.565
228193	55.2	1.35788	5.981		29.0348	13.5788	121.565
228393	55.34	1.35843	5.98		29.1084	13.5843	121.545
228593	55.3	1.35965	5.98		29.0874	13.5965	121.545
228794	55.34	1.36073	5.98		29.1084	13.6073	121.545
228994	55.66	1.36142	5.98		29.2768	13.6142	121.545
229195	55.72	1.3624	5.981		29.3083	13.624	121.565
229395	55.58	1.36375	5.98		29.2347	13.6375	121.545
229595	55.74	1.36469	5.98		29.3188	13.6469	121.545
229796	55.74	1.36539	5.979		29.3188	13.6539	121.524
229996	55.44	1.3667	5.978		29.161	13.667	121.504
230197	55.88	1.36734	5.977		29.3925	13.6734	121.484
230397	55.88	1.36734	5.977		29.3925	13.6734	121.484
230597	56.04	1.36939	5.982		29.4766	13.6939	121.585
230799	55.6	1.37054	5.979		29.2452	13.7054	121.524
231000	56.16	1.37124	5.979		29.5398	13.7124	121.524
231200	55.82	1.37256	5.979		29.3609	13.7256	121.524
231401	55.88	1.37374	5.982		29.3925	13.7374	121.585
231601	56.12	1.37446	5.981		29.5187	13.7446	121.565
231801	56.24	1.37542	5.982		29.5818	13.7542	121.585
232002	55.82	1.37636	5.981		29.3609	13.7636	121.565
232202	55.98	1.37761	5.979		29.4451	13.7761	121.524
232403	56.2	1.37813	5.982		29.5608	13.7813	121.585
232603	55.94	1.37972	5.976		29.424	13.7972	121.463
232803	56.26	1.38021	5.979		29.5924	13.8021	121.524
233004	56.32	1.38149	5.979		29.6239	13.8149	121.524
233204	56.18	1.38264	5.98		29.5503	13.8264	121.545
233405	56.56	1.383	5.983		29.7502	13.83	121.606
233605	56.08	1.38447	5.978		29.4977	13.8447	121.504
233805	56.28	1.3852	5.979		29.6029	13.852	121.524
234007	56.38	1.38647	5.98		29.6555	13.8647	121.545
234208	56.44	1.38735	5.979		29.687	13.8735	121.524
234408	56.2	1.38823	5.981		29.5608	13.8823	121.565
234609	56.54	1.38941	5.98		29.7396	13.8941	121.545
234809	56.06	1.39038	5.981		29.4872	13.9038	121.565
235009	56.44	1.39125	5.98		29.687	13.9125	121.545
235210	56.72	1.39235	5.98		29.8343	13.9235	121.545
235410	56.66	1.39307	5.981		29.8028	13.9307	121.565
235611	56.46	1.39444	5.979		29.6976	13.9444	121.524
235811	56.74	1.39534	5.978		29.8448	13.9534	121.504
236011	56.86	1.3961	5.982		29.908	13.961	121.585
236212	56.5	1.39732	5.98		29.7186	13.9732	121.545
236412	57	1.39835	5.982		29.9816	13.9835	121.585
236613	56.84	1.39911	5.982		29.8974	13.9911	121.585
236813	56.74	1.40044	5.98		29.8448	14.0044	121.545
237013	56.86	1.401	5.977		29.908	14.01	121.484
237215	56.86	1.4024	5.978		29.908	14.024	121.504
237416	57.16	1.40309	5.98		30.0658	14.0309	121.545
237616	57.2	1.40418	5.981		30.0868	14.0418	121.565
237817	57.24	1.40487	5.978		30.1078	14.0487	121.504
238017	56.86	1.4062	5.98		29.908	14.062	121.545
238217	57.26	1.40726	5.98		30.1184	14.0726	121.545
238418	57.34	1.40783	5.983		30.1604	14.0783	121.606
238618	57.02	1.40894	5.98		29.9921	14.0894	121.545
238819	57.02	1.41024	5.98		29.9921	14.1024	121.545
239019	57.5	1.41077	5.979		30.2446	14.1077	121.524
239219	57.12	1.41211	5.979		30.0447	14.1211	121.524
239420	57.66	1.41282	5.982		30.3288	14.1282	121.585
239620	57.2	1.41418	5.977		30.0868	14.1418	121.484
239821	57.62	1.41473	5.981		30.3077	14.1473	121.565
240021	57.44	1.4161	5.979		30.213	14.161	121.524
240221	57.78	1.41688	5.982		30.3919	14.1688	121.585
240422	57.42	1.4179	5.979		30.2025	14.179	121.524
240622	57.88	1.41894	5.98		30.4445	14.1894	121.545
240823	57.88	1.41894	5.98		30.4445	14.1894	121.545
241023	57.92	1.42083	5.978		30.4655	14.2083	121.504
241223	57.64	1.42183	5.977		30.3182	14.2183	121.484
241425	57.72	1.4229	5.977		30.3603	14.229	121.484
241626	57.76	1.42418	5.982		30.3814	14.2418	121.585
241826	57.92	1.42473	5.982		30.4655	14.2473	121.585
242027	57.66	1.42592	5.981		30.3288	14.2592	121.565
242227	57.9	1.42693	5.982		30.455	14.2693	121.585
242427	58.02	1.42799	5.981		30.5181	14.2799	121.565
242628	58.16	1.42854	5.979		30.5917	14.2854	121.524
242828	57.88	1.42984	5.981		30.4445	14.2984	121.565
243029	58.22	1.43072	5.976		30.6233	14.3072	121.463
243229	58.12	1.43166	5.982		30.5707	14.3166	121.585
243429	57.92	1.43273	5.98		30.4655	14.3273	121.545
243630	57.92	1.43403	5.981		30.4655	14.3403	121.565
243830	58.02	1.43459	5.979		30.5181	14.3459	121.524
244031	57.96	1.43591	5.98		30.4866	14.3591	121.545
244231	58.24	1.43652	5.98		30.6338	14.3652	121.545
244431	58	1.4379	5.98		30.5076	14.379	121.545
244633	58.3	1.43839	5.98		30.6654	14.3839	121.545
244834	58.32	1.43979	5.98		30.6759	14.3979	121.545
245034	58.56	1.4408	5.98		30.8021	14.408	121.545
245235	58.36	1.44157	5.981		30.6969	14.4157	121.565
245435	58.56	1.4429	5.98		30.8021	14.429	121.545
245635	58.38	1.44357	5.983		30.7075	14.4357	121.606
245836	58.62	1.44448	5.978		30.8337	14.4448	121.504
246036	58.7	1.44555	5.981		30.8758	14.4555	121.565
246237	58.48	1.44663	5.977		30.7601	14.4663	121.484
246618	58.36	1.44857	5.977		30.6969	14.4857	121.484
246819	58.9	1.44939	5.982		30.981	14.4939	121.585
247019	58.54	1.45051	5.983		30.7916	14.5051	121.606
247219	58.76	1.45153	5.979		30.9073	14.5153	121.524
247420	58.8	1.45262	5.979		30.9284	14.5262	121.524
247620	58.86	1.4532	5.981		30.9599	14.532	121.565
247821	58.66	1.45457	5.98		30.8547	14.5457	121.545
248021	58.94	1.45527	5.981		31.002	14.5527	121.565
248221	58.86	1.4568	5.979		30.9599	14.568	121.524
248422	58.86	1.4573	5.978		30.9599	14.573	121.504
248622	59.1	1.45842	5.981		31.0862	14.5842	121.565
248832	58.84	1.45961	5.978		30.9494	14.5961	121.504
249032	59.24	1.46027	5.98		31.1598	14.6027	121.545
249233	58.78	1.46133	5.98		30.9179	14.6133	121.545
249433	59.06	1.46243	5.982		31.0651	14.6243	121.585
249633	59.38	1.46342	5.98		31.2335	14.6342	121.545
249834	59.3	1.46434	5.979		31.1914	14.6434	121.524
250034	59.34	1.46523	5.981		31.2124	14.6523	121.565
250235	59.22	1.46637	5.979		31.1493	14.6637	121.524
250435	59.26	1.46746	5.98		31.1703	14.6746	121.545
250635	59.48	1.46818	5.981		31.2861	14.6818	121.565
250836	59.1	1.46951	5.98		31.0862	14.6951	121.545
251036	59.52	1.47027	5.98		31.3071	14.7027	121.545
251237	59.38	1.47142	5.983		31.2335	14.7142	121.606
251437	59.28	1.47255	5.98		31.1809	14.7255	121.545
251637	59.7	1.473	5.979		31.4018	14.73	121.524
251838	59.34	1.47423	5.978		31.2124	14.7423	121.504
252038	59.78	1.47518	5.981		31.4439	14.7518	121.565
252239	59.4	1.47631	5.981		31.244	14.7631	121.565
252439	59.9	1.47723	5.981		31.507	14.7723	121.565
252639	59.64	1.47813	5.98		31.3702	14.7813	121.545
252841	59.72	1.4795	5.979		31.4123	14.795	121.524
253042	59.86	1.47995	5.978		31.4859	14.7995	121.504
253242	59.72	1.481	5.977		31.4123	14.81	121.484
253443	59.74	1.48259	5.981		31.4228	14.8259	121.565
253643	59.92	1.48293	5.98		31.5175	14.8293	121.545
253843	59.72	1.4845	5.977		31.4123	14.845	121.484
254044	59.96	1.48491	5.982		31.5385	14.8491	121.585
254244	59.74	1.48629	5.978		31.4228	14.8629	121.504
254445	60.18	1.48694	5.981		31.6543	14.8694	121.565
254645	59.9	1.48803	5.98		31.507	14.8803	121.545
254845	59.64	1.48933	5.978		31.3702	14.8933	121.504
255046	60.24	1.48982	5.978		31.6858	14.8982	121.504
255246	59.78	1.49128	5.98		31.4439	14.9128	121.545
255447	60.24	1.49212	5.978		31.6858	14.9212	121.504
255647	59.8	1.49317	5.982		31.4544	14.9317	121.585
255847	60.18	1.49424	5.98		31.6543	14.9424	121.545
256049	60.48	1.49493	5.979		31.8121	14.9493	121.524
256250	60.02	1.49609	5.977		31.5701	14.9609	121.484
256450	60.1	1.49716	5.981		31.6122	14.9716	121.565
256651	60.56	1.498	5.98		31.8541	14.98	121.545
256851	60.48	1.49913	5.977		31.8121	14.9913	121.484
257051	60.68	1.49986	5.979		31.9173	14.9986	121.524
257252	60.2	1.50093	5.98		31.6648	15.0093	121.545
257452	60.22	1.50212	5.983		31.6753	15.0212	121.606
257653	60.76	1.50263	5.979		31.9593	15.0263	121.524
257853	60.38	1.50407	5.982		31.7595	15.0407	121.585
258053	60.74	1.50494	5.98		31.9488	15.0494	121.545
258254	60.84	1.50591	5.979		32.0014	15.0591	121.524
258454	60.88	1.50679	5.981		32.0225	15.0679	121.565
258655	60.64	1.50788	5.981		31.8962	15.0788	121.565
258855	60.58	1.509	5.979		31.8647	15.09	121.524
259055	61.1	1.50981	5.976		32.1382	15.0981	121.463
259257	60.94	1.51067	5.98		32.054	15.1067	121.545
259458	60.68	1.51226	5.979		31.9173	15.1226	121.524
259658	61.14	1.5126	5.98		32.1592	15.126	121.545
259859	60.96	1.51376	5.979		32.0645	15.1376	121.524
260059	60.94	1.51477	5.982		32.054	15.1477	121.585
260259	61.02	1.51584	5.98		32.0961	15.1584	121.545
260460	61.16	1.51689	5.979		32.1697	15.1689	121.524
260660	61.18	1.51769	5.981		32.1802	15.1769	121.565
260861	61.14	1.5186	5.98		32.1592	15.186	121.545
261061	61.24	1.51957	5.981		32.2118	15.1957	121.565
261261	61.06	1.52073	5.98		32.1171	15.2073	121.545
261462	61.2	1.52198	5.98		32.1908	15.2198	121.545
261662	61.36	1.52262	5.979		32.2749	15.2262	121.524
261863	60.98	1.52386	5.98		32.075	15.2386	121.545
262063	61.46	1.52469	5.978		32.3275	15.2469	121.504
262263	61.32	1.52574	5.981		32.2539	15.2574	121.565
262465	61.18	1.52679	5.981		32.1802	15.2679	121.565
262666	61.64	1.52753	5.979		32.4222	15.2753	121.524
262866	61.18	1.52879	5.982		32.1802	15.2879	121.585
263067	61.68	1.52941	5.981		32.4432	15.2941	121.565
263267	61.68	1.52941	5.981		32.4432	15.2941	121.565
263479	61.7	1.5319	5.979		32.4538	15.319	121.524
263679	61.42	1.5326	5.98		32.3065	15.326	121.545
263880	61.6	1.53384	5.981		32.4012	15.3384	121.565
264080	61.7	1.53451	5.979		32.4538	15.3451	121.524
264281	61.6	1.53584	5.981		32.4012	15.3584	121.565
264481	61.6	1.53654	5.979		32.4012	15.3654	121.524
264681	61.7	1.5378	5.98		32.4538	15.378	121.545
264883	61.98	1.53841	5.978		32.601	15.3841	121.504
265084	61.92	1.53953	5.979		32.5695	15.3953	121.524
265284	61.56	1.54075	5.981		32.3801	15.4075	121.565
265485	61.9	1.54133	5.978		32.559	15.4133	121.504
265685	61.88	1.54274	5.981		32.5484	15.4274	121.565
265885	61.94	1.54342	5.981		32.58	15.4342	121.565
266086	61.52	1.54457	5.98		32.3591	15.4457	121.545
266286	62.12	1.54546	5.98		32.6747	15.4546	121.545
266487	61.9	1.54643	5.979		32.559	15.4643	121.524
266687	61.94	1.54752	5.977		32.58	15.4752	121.484
266887	62.06	1.54848	5.979		32.6431	15.4848	121.524
267088	62.14	1.54935	5.98		32.6852	15.4935	121.545
267288	61.88	1.55054	5.979		32.5484	15.5054	121.524
267489	62.28	1.5515	5.981		32.7588	15.515	121.565
267689	62.38	1.55247	5.983		32.8114	15.5247	121.606
267889	62.38	1.55327	5.977		32.8114	15.5327	121.484
268091	62.08	1.55467	5.981		32.6536	15.5467	121.565
268292	62.24	1.55572	5.979		32.7378	15.5572	121.524
268492	62.22	1.55642	5.976		32.7273	15.5642	121.463
268693	62.24	1.55762	5.983		32.7378	15.5762	121.606
268893	62.46	1.55864	5.98		32.8535	15.5864	121.545
269093	62.16	1.55934	5.978		32.6957	15.5934	121.504
269294	62.16	1.56054	5.98		32.6957	15.6054	121.545
269494	62.58	1.5614	5.977		32.9166	15.614	121.484
269902	62.64	1.56348	5.98		32.9482	15.6348	121.545
270103	62.76	1.56433	5.981		33.0113	15.6433	121.565
270303	62.32	1.56549	5.98		32.7799	15.6549	121.545
270504	62.58	1.5667	5.98		32.9166	15.667	121.545
270704	62.58	1.5673	5.977		32.9166	15.673	121.484
270905	62.32	1.56889	5.98		32.7799	15.6889	121.545
271105	62.76	1.56923	5.978		33.0113	15.6923	121.504
271305	62.48	1.57043	5.981		32.864	15.7043	121.565
271507	62.96	1.57136	5.98		33.1165	15.7136	121.545
271708	62.76	1.57223	5.981		33.0113	15.7223	121.565
271908	62.88	1.57319	5.978		33.0744	15.7319	121.504
272109	62.72	1.57435	5.98		32.9903	15.7435	121.545
272309	62.68	1.57556	5.98		32.9692	15.7556	121.545
272509	62.94	1.57617	5.983		33.106	15.7617	121.606
272710	62.82	1.57721	5.979		33.0429	15.7721	121.524
272910	62.92	1.57818	5.98		33.0955	15.7818	121.545
273111	63.08	1.57912	5.981		33.1796	15.7912	121.565
273311	62.9	1.58038	5.98		33.085	15.8038	121.545
273511	63.14	1.5814	5.98		33.2112	15.814	121.545
273712	63.08	1.58252	5.978		33.1796	15.8252	121.504
273912	63.2	1.58318	5.979		33.2428	15.8318	121.524
274113	62.96	1.58426	5.98		33.1165	15.8426	121.545
274313	63.3	1.58494	5.983		33.2954	15.8494	121.606
274513	63.26	1.58646	5.981		33.2743	15.8646	121.565
274715	63.02	1.58744	5.98		33.1481	15.8744	121.545
274916	63.36	1.58802	5.982		33.3269	15.8802	121.585
275116	63.18	1.58939	5.98		33.2322	15.8939	121.545
275317	63.48	1.59028	5.982		33.39	15.9028	121.585
275517	63.6	1.59114	5.976		33.4532	15.9114	121.463
275717	63.3	1.59204	5.982		33.2954	15.9204	121.585
275918	63.46	1.59329	5.978		33.3795	15.9329	121.504
276118	63.58	1.59415	5.98		33.4426	15.9415	121.545
276319	63.18	1.59519	5.98		33.2322	15.9519	121.545
276519	63.64	1.59603	5.981		33.4742	15.9603	121.565
276719	63.3	1.59714	5.979		33.2954	15.9714	121.524
276920	63.56	1.59815	5.978		33.4321	15.9815	121.504
277120	63.64	1.59933	5.979		33.4742	15.9933	121.524
277321	63.72	1.5999	5.979		33.5163	15.999	121.524
277521	63.62	1.60113	5.978		33.4637	16.0113	121.504
277721	63.88	1.60224	5.98		33.6004	16.0224	121.545
277922	63.96	1.60281	5.98		33.6425	16.0281	121.545
278122	63.52	1.60407	5.981		33.4111	16.0407	121.565
278323	64	1.6049	5.981		33.6635	16.049	121.565
278523	63.74	1.60599	5.978		33.5268	16.0599	121.504
278723	63.38	1.60732	5.982		33.3374	16.0732	121.585
278925	63.88	1.60824	5.982		33.6004	16.0824	121.585
279126	64.04	1.60909	5.983		33.6846	16.0909	121.606
279326	64.1	1.60977	5.978		33.7161	16.0977	121.504
279527	63.92	1.61093	5.981		33.6215	16.1093	121.565
279727	63.98	1.61221	5.977		33.653	16.1221	121.484
279927	63.98	1.61291	5.979		33.653	16.1291	121.524
280128	64.08	1.61427	5.982		33.7056	16.1427	121.585
280328	63.92	1.61493	5.981		33.6215	16.1493	121.565
280529	64.18	1.61614	5.979		33.7582	16.1614	121.524
280729	64.1	1.61677	5.98		33.7161	16.1677	121.545
280929	64.44	1.61815	5.982		33.895	16.1815	121.585
281130	63.96	1.61891	5.98		33.6425	16.1891	121.545
281330	64.22	1.62012	5.98		33.7793	16.2012	121.545
281531	64.6	1.62079	5.982		33.9791	16.2079	121.585
281731	64.02	1.62189	5.981		33.6741	16.2189	121.565
281931	64.26	1.62311	5.977		33.8003	16.2311	121.484
282133	64.6	1.62359	5.981		33.9791	16.2359	121.565
282334	64.24	1.62502	5.98		33.7898	16.2502	121.545
282534	64.68	1.62586	5.978		34.0212	16.2586	121.504
282735	64.1	1.62687	5.979		33.7161	16.2687	121.524
282935	64.56	1.6281	5.978		33.9581	16.281	121.504
283135	64.34	1.62878	5.978		33.8424	16.2878	121.504
283336	64.74	1.62984	5.98		34.0528	16.2984	121.545
283536	64.78	1.63073	5.978		34.0738	16.3073	121.504
283737	64.74	1.63184	5.98		34.0528	16.3184	121.545
283937	64.78	1.63293	5.98		34.0738	16.3293	121.545
284137	64.94	1.63387	5.979		34.158	16.3387	121.524
284338	64.96	1.63446	5.982		34.1685	16.3446	121.585
284538	64.46	1.63594	5.981		33.9055	16.3594	121.565
284739	64.98	1.63676	5.98		34.179	16.3676	121.545
284939	65.04	1.63754	5.983		34.2106	16.3754	121.606
285139	65.04	1.63754	5.983		34.2106	16.3754	121.606
285341	65.2	1.63968	5.983		34.2947	16.3968	121.606
285542	64.78	1.64073	5.979		34.0738	16.4073	121.524
285742	64.94	1.64187	5.981		34.158	16.4187	121.565
285943	65.16	1.64269	5.979		34.2737	16.4269	121.524
286143	64.68	1.64376	5.979		34.0212	16.4376	121.524
286343	65.22	1.64467	5.979		34.3053	16.4467	121.524
286544	64.86	1.6456	5.979		34.1159	16.456	121.524
286744	65.02	1.64694	5.979		34.2001	16.4694	121.524
286945	65.24	1.64737	5.98		34.3158	16.4737	121.545
287145	65.02	1.64864	5.979		34.2001	16.4864	121.524
287345	65.28	1.64995	5.981		34.3368	16.4995	121.565
287546	65.14	1.6506	5.978		34.2632	16.506	121.504
287746	64.96	1.65176	5.978		34.1685	16.5176	121.504
287947	65.42	1.6524	5.978		34.4105	16.524	121.504
288147	65.42	1.6524	5.978		34.4105	16.524	121.504
288347	65.52	1.65467	5.977		34.4631	16.5467	121.484
288549	65.34	1.65543	5.98		34.3684	16.5543	121.545
288750	65.4	1.65671	5.982		34.3999	16.5671	121.585
288950	65.72	1.6576	5.984		34.5683	16.576	121.626
289151	65.72	1.6576	5.984		34.5683	16.576	121.626
289351	65.64	1.65953	5.981		34.5262	16.5953	121.565
289551	65.7	1.6605	5.981		34.5577	16.605	121.565
289752	65.3	1.66134	5.981		34.3473	16.6134	121.565
289952	65.3	1.66134	5.981		34.3473	16.6134	121.565
290153	65.3	1.66364	5.98		34.3473	16.6364	121.545
290353	65.76	1.66458	5.979		34.5893	16.6458	121.524
290553	65.9	1.66543	5.979		34.6629	16.6543	121.524
290754	65.58	1.66635	5.977		34.4946	16.6635	121.484
290954	65.62	1.66773	5.982		34.5157	16.6773	121.585
291155	65.26	1.66856	5.98		34.3263	16.6856	121.545
291355	65.92	1.66933	5.98		34.6735	16.6933	121.545
291555	65.46	1.67049	5.98		34.4315	16.7049	121.545
291757	65.94	1.67152	5.98		34.684	16.7152	121.545
291958	66.02	1.67229	5.98		34.7261	16.7229	121.545
292158	65.7	1.6737	5.98		34.5577	16.737	121.545
292359	65.98	1.67421	5.98		34.705	16.7421	121.545
292559	65.76	1.67548	5.979		34.5893	16.7548	121.524
292759	66.06	1.67628	5.982		34.7471	16.7628	121.585
292960	65.8	1.67757	5.981		34.6103	16.7757	121.565
293160	65.98	1.67821	5.98		34.705	16.7821	121.545
293361	66.04	1.67959	5.977		34.7366	16.7959	121.484
293561	66.38	1.68017	5.98		34.9154	16.8017	121.545
293761	65.98	1.68141	5.978		34.705	16.8141	121.504
293962	66.34	1.68228	5.98		34.8944	16.8228	121.545
294162	65.96	1.68331	5.979		34.6945	16.8331	121.524
294363	66.5	1.68422	5.978		34.9785	16.8422	121.504
294563	66.14	1.68515	5.981		34.7892	16.8515	121.565
294763	66.26	1.68641	5.981		34.8523	16.8641	121.565
294965	66.48	1.68723	5.977		34.968	16.8723	121.484
295166	66.36	1.68817	5.978		34.9049	16.8817	121.504
295366	66.5	1.68922	5.98		34.9785	16.8922	121.545
295567	66.32	1.69029	5.981		34.8839	16.9029	121.565
295767	66.34	1.69128	5.978		34.8944	16.9128	121.504
295967	66.12	1.69236	5.98		34.7787	16.9236	121.545
296168	66.54	1.69331	5.98		34.9996	16.9331	121.545
296368	65.98	1.69431	5.978		34.705	16.9431	121.504
296569	66.32	1.69549	5.981		34.8839	16.9549	121.565
296769	66.48	1.69633	5.979		34.968	16.9633	121.524
296969	66.62	1.69738	5.977		35.0416	16.9738	121.484
297170	66.72	1.69795	5.981		35.0942	16.9795	121.565
297370	66.72	1.69795	5.981		35.0942	16.9795	121.565
297571	66.78	1.70013	5.981		35.1258	17.0013	121.565
297771	66.66	1.70107	5.976		35.0627	17.0107	121.463
297971	66.3	1.70229	5.98		34.8733	17.0229	121.545
298172	66.72	1.70285	5.978		35.0942	17.0285	121.504
298372	66.34	1.70438	5.98		34.8944	17.0438	121.545
298573	66.88	1.70499	5.981		35.1784	17.0499	121.565
298773	66.88	1.70599	5.978		35.1784	17.0599	121.504
298973	66.88	1.70599	5.978		35.1784	17.0599	121.504
299175	66.92	1.70788	5.981		35.1994	17.0788	121.565
299376	66.46	1.70934	5.982		34.9575	17.0934	121.585
299576	66.88	1.70989	5.977		35.1784	17.0989	121.484
299777	66.58	1.7112	5.981		35.0206	17.112	121.565
299977	66.94	1.71187	5.98		35.21	17.1187	121.545
300177	66.54	1.71331	5.98		34.9996	17.1331	121.545
300378	67.16	1.71389	5.978		35.3257	17.1389	121.504
300578	66.84	1.71521	5.981		35.1574	17.1521	121.565
300779	67.22	1.71587	5.978		35.3572	17.1587	121.504
300979	67.22	1.71587	5.978		35.3572	17.1587	121.504
301179	67.22	1.71787	5.982		35.3572	17.1787	121.585
301380	67.18	1.71889	5.98		35.3362	17.1889	121.545
301580	67.12	1.72031	5.98		35.3046	17.2031	121.545
301781	67.2	1.72088	5.98		35.3467	17.2088	121.545
301981	67.32	1.72234	5.979		35.4098	17.2234	121.524
302181	67.32	1.72234	5.979		35.4098	17.2234	121.524
302383	67.56	1.72375	5.985		35.5361	17.2375	121.646
302584	67.42	1.7247	5.977		35.4624	17.247	121.484
302784	67.44	1.7259	5.978		35.473	17.259	121.504
302985	67.56	1.72685	5.976		35.5361	17.2685	121.463
303185	67.56	1.72685	5.976		35.5361	17.2685	121.463
303385	67.6	1.72874	5.98		35.5571	17.2874	121.545
303586	67.24	1.72997	5.982		35.3678	17.2997	121.585
303786	67.56	1.73115	5.981		35.5361	17.3115	121.565
303987	67.56	1.73175	5.98		35.5361	17.3175	121.545
304187	67.6	1.73274	5.978		35.5571	17.3274	121.504
304387	67.52	1.73417	5.98		35.515	17.3417	121.545
304588	67.44	1.7349	5.976		35.473	17.349	121.463
304788	67.66	1.73612	5.978		35.5887	17.3612	121.504
304989	67.8	1.73667	5.979		35.6623	17.3667	121.524
305189	67.52	1.73787	5.979		35.515	17.3787	121.524
305389	67.4	1.73911	5.98		35.4519	17.3911	121.545
305591	67.82	1.73966	5.98		35.6728	17.3966	121.545
305792	67.4	1.74101	5.98		35.4519	17.4101	121.545
305992	67.4	1.74101	5.98		35.4519	17.4101	121.545
306193	67.38	1.74312	5.978		35.4414	17.4312	121.504
306393	67.86	1.74365	5.98		35.6939	17.4365	121.545
306593	67.58	1.74495	5.981		35.5466	17.4495	121.565
306794	67.52	1.74597	5.981		35.515	17.4597	121.565
306994	68.12	1.74656	5.982		35.8306	17.4656	121.585
307195	67.62	1.74813	5.98		35.5676	17.4813	121.545
307395	68.1	1.74866	5.981		35.8201	17.4866	121.565
307595	67.7	1.7499	5.977		35.6097	17.499	121.484
307796	68.14	1.75075	5.98		35.8412	17.5075	121.545
307996	67.8	1.75167	5.978		35.6623	17.5167	121.504
308197	67.7	1.75301	5.981		35.6097	17.5301	121.565
308397	68.12	1.75356	5.982		35.8306	17.5356	121.585
308597	68.12	1.75356	5.982		35.8306	17.5356	121.585
308799	68.24	1.75542	5.979		35.8938	17.5542	121.524
309000	67.9	1.75704	5.979		35.7149	17.5704	121.524
309200	68.1	1.75757	5.977		35.8201	17.5757	121.484
309401	67.96	1.75891	5.978		35.7465	17.5891	121.504
309601	68.38	1.75947	5.978		35.9674	17.5947	121.504
309801	67.94	1.76082	5.98		35.736	17.6082	121.545
310002	68.4	1.76176	5.98		35.9779	17.6176	121.545
310202	68.4	1.76176	5.98		35.9779	17.6176	121.545
310403	68.5	1.76372	5.982		36.0305	17.6372	121.585
310603	68.28	1.7646	5.98		35.9148	17.646	121.545
310803	67.98	1.76601	5.982		35.757	17.6601	121.585
311004	68.18	1.76664	5.98		35.8622	17.6664	121.545
311204	68.1	1.76777	5.98		35.8201	17.6777	121.545
311405	68.54	1.76851	5.982		36.0516	17.6851	121.585
311605	68.54	1.76851	5.982		36.0516	17.6851	121.585
311805	68.66	1.77057	5.981		36.1147	17.7057	121.565
312007	68.22	1.77162	5.981		35.8832	17.7162	121.565
312208	68.42	1.77295	5.98		35.9884	17.7295	121.545
312408	68.64	1.77348	5.979		36.1042	17.7348	121.524
312609	68.48	1.77493	5.98		36.02	17.7493	121.545
312809	68.84	1.77551	5.98		36.2094	17.7551	121.545
313009	68.66	1.77657	5.983		36.1147	17.7657	121.606
313210	68.34	1.77788	5.981		35.9464	17.7788	121.565
313410	68.32	1.77849	5.976		35.9358	17.7849	121.463
313611	68.74	1.77974	5.981		36.1568	17.7974	121.565
313811	68.74	1.77974	5.981		36.1568	17.7974	121.565
314011	68.84	1.78141	5.978		36.2094	17.8141	121.504
314212	68.84	1.78141	5.978		36.2094	17.8141	121.504
314412	68.84	1.78331	5.982		36.2094	17.8331	121.585
314613	68.5	1.78492	5.98		36.0305	17.8492	121.545
314813	68.56	1.7856	5.979		36.0621	17.856	121.524
315013	69	1.78655	5.978		36.2935	17.8655	121.504
315215	68.84	1.78731	5.981		36.2094	17.8731	121.565
315416	68.78	1.78863	5.977		36.1778	17.8863	121.484
315616	68.78	1.78983	5.98		36.1778	17.8983	121.545
315817	68.32	1.79069	5.98		35.9358	17.9069	121.545
316017	68.92	1.79158	5.98		36.2514	17.9158	121.545
316217	69.02	1.79234	5.98		36.304	17.9234	121.545
316418	68.56	1.7938	5.979		36.0621	17.938	121.524
316618	68.74	1.79444	5.979		36.1568	17.9444	121.524
316819	68.86	1.7958	5.981		36.2199	17.958	121.565
317019	69.24	1.79617	5.98		36.4198	17.9617	121.545
317219	69.24	1.79617	5.98		36.4198	17.9617	121.545
317420	69.26	1.79826	5.981		36.4303	17.9826	121.565
317620	69.02	1.79934	5.981		36.304	17.9934	121.565
317821	68.94	1.80057	5.982		36.262	18.0057	121.585
318021	69.28	1.80155	5.978		36.4408	18.0155	121.504
318221	68.74	1.80254	5.984		36.1568	18.0254	121.626
318422	69.18	1.80339	5.979		36.3882	18.0339	121.524
318622	69.2	1.80468	5.981		36.3987	18.0468	121.565
318823	69.24	1.80557	5.979		36.4198	18.0557	121.524
319023	69.4	1.80631	5.98		36.5039	18.0631	121.545
319223	69.28	1.80715	5.979		36.4408	18.0715	121.524
319425	68.96	1.80856	5.977		36.2725	18.0856	121.484
319626	68.96	1.80856	5.977		36.2725	18.0856	121.484
319826	68.8	1.81062	5.98		36.1883	18.1062	121.545
320027	69.58	1.81125	5.983		36.5986	18.1125	121.606
320227	69.2	1.81238	5.978		36.3987	18.1238	121.504
320427	69.24	1.81347	5.98		36.4198	18.1347	121.545
320628	69.34	1.81453	5.98		36.4724	18.1453	121.545
320828	69.68	1.81511	5.981		36.6512	18.1511	121.565
321029	69.2	1.81648	5.981		36.3987	18.1648	121.565
321229	69.58	1.81705	5.979		36.5986	18.1705	121.524
321429	69.44	1.8186	5.98		36.5249	18.186	121.545
321630	69.4	1.81931	5.982		36.5039	18.1931	121.585
321830	69.72	1.8204	5.977		36.6722	18.204	121.484
322031	69.48	1.82148	5.981		36.546	18.2148	121.565
322231	69.52	1.82247	5.983		36.567	18.2247	121.606
322431	69.8	1.82337	5.982		36.7143	18.2337	121.585
322633	69.56	1.82415	5.981		36.5881	18.2415	121.565
322834	69.44	1.8255	5.982		36.5249	18.255	121.585
323034	69.8	1.82617	5.98		36.7143	18.2617	121.545
323235	69.58	1.82725	5.98		36.5986	18.2725	121.545
323435	69.8	1.82837	5.982		36.7143	18.2837	121.585
323635	69.8	1.82837	5.982		36.7143	18.2837	121.585
323836	69.86	1.83025	5.98		36.7459	18.3025	121.545
324036	69.68	1.83141	5.98		36.6512	18.3141	121.545
324237	69.8	1.83217	5.98		36.7143	18.3217	121.545
324437	69.64	1.83353	5.98		36.6301	18.3353	121.545
324637	69.52	1.83427	5.98		36.567	18.3427	121.545
324838	69.88	1.83524	5.982		36.7564	18.3524	121.585
325038	69.52	1.83627	5.977		36.567	18.3627	121.484
325239	69.72	1.8375	5.979		36.6722	18.375	121.524
325439	69.98	1.83841	5.98		36.809	18.3841	121.545
325639	69.98	1.83841	5.98		36.809	18.3841	121.545
325841	70.1	1.83996	5.977		36.8721	18.3996	121.484
326042	69.6	1.84164	5.979		36.6091	18.4164	121.524
326242	69.84	1.84226	5.98		36.7353	18.4226	121.545
326443	70.14	1.84315	5.979		36.8931	18.4315	121.524
326643	69.6	1.84424	5.98		36.6091	18.4424	121.545
326843	70.08	1.84527	5.981		36.8616	18.4527	121.565
327046	70.08	1.84527	5.981		36.8616	18.4527	121.565
327246	70.2	1.84693	5.978		36.9247	18.4693	121.504
327447	69.96	1.84811	5.977		36.7985	18.4811	121.484
327647	69.88	1.84934	5.98		36.7564	18.4934	121.545
327847	70.2	1.84993	5.979		36.9247	18.4993	121.524
328049	70.2	1.84993	5.979		36.9247	18.4993	121.524
328250	70.28	1.8522	5.979		36.9668	18.522	121.524
328450	70.32	1.85299	5.979		36.9878	18.5299	121.524
328651	70.06	1.85428	5.98		36.8511	18.5428	121.545
328851	70.16	1.85544	5.978		36.9037	18.5544	121.504
329051	70.16	1.85614	5.978		36.9037	18.5614	121.504
329252	70.34	1.85708	5.981		36.9983	18.5708	121.565
329452	70.36	1.85817	5.982		37.0089	18.5817	121.585
329653	70.24	1.85902	5.978		36.9457	18.5902	121.504
329853	70.26	1.86021	5.981		36.9563	18.6021	121.565
330053	70.18	1.86104	5.979		36.9142	18.6104	121.524
330254	70.48	1.86213	5.98		37.072	18.6213	121.545
330454	70.48	1.86293	5.98		37.072	18.6293	121.545
330655	70.5	1.86402	5.98		37.0825	18.6402	121.545
330855	70.16	1.86514	5.979		36.9037	18.6514	121.524
331055	70	1.8664	5.98		36.8195	18.664	121.545
331257	70.14	1.86705	5.979		36.8931	18.6705	121.524
331458	70.54	1.86831	5.98		37.1035	18.6831	121.545
331658	70.04	1.86939	5.978		36.8405	18.6939	121.504
331859	70.38	1.86997	5.979		37.0194	18.6997	121.524
332059	70.46	1.87114	5.98		37.0615	18.7114	121.545
332259	70.58	1.8722	5.978		37.1246	18.722	121.504
332460	70.58	1.8722	5.978		37.1246	18.722	121.504
332660	70.72	1.87385	5.984		37.1982	18.7385	121.626
332861	70.26	1.87521	5.978		36.9563	18.7521	121.504
333061	70.62	1.87618	5.979		37.1456	18.7618	121.524
333261	70.54	1.87721	5.982		37.1035	18.7721	121.585
333462	70.48	1.87813	5.98		37.072	18.7813	121.545
333662	70.72	1.87905	5.981		37.1982	18.7905	121.565
333863	70.72	1.87985	5.979		37.1982	18.7985	121.524
334063	70.6	1.88129	5.979		37.1351	18.8129	121.524
334263	70.24	1.88212	5.981		36.9457	18.8212	121.565
334465	70.24	1.88212	5.981		36.9457	18.8212	121.565
334666	70.22	1.88422	5.978		36.9352	18.8422	121.504
334866	70.98	1.88496	5.98		37.335	18.8496	121.545
335067	70.86	1.886	5.98		37.2719	18.86	121.545
335267	70.82	1.88691	5.976		37.2508	18.8691	121.463
335467	70.96	1.88806	5.981		37.3245	18.8806	121.565
335668	70.98	1.88876	5.977		37.335	18.8876	121.484
335868	70.54	1.89011	5.981		37.1035	18.9011	121.565
336069	70.96	1.89066	5.981		37.3245	18.9066	121.565
336269	71.06	1.89223	5.98		37.3771	18.9223	121.545
336469	71.06	1.89223	5.98		37.3771	18.9223	121.545
336670	71.1	1.89392	5.981		37.3981	18.9392	121.565
336870	71.02	1.89474	5.98		37.356	18.9474	121.545
337071	70.9	1.89599	5.982		37.2929	18.9599	121.585
337271	70.82	1.89711	5.979		37.2508	18.9711	121.524
337471	70.92	1.89798	5.977		37.3034	18.9798	121.484
337672	71.12	1.89881	5.981		37.4086	18.9881	121.565
337872	70.92	1.90008	5.98		37.3034	19.0008	121.545
338073	71.06	1.90103	5.979		37.3771	19.0103	121.524
338273	71.36	1.90182	5.978		37.5349	19.0182	121.504
338473	71.26	1.90276	5.981		37.4823	19.0276	121.565
338675	70.82	1.90421	5.98		37.2508	19.0421	121.545
338876	71.22	1.90477	5.979		37.4612	19.0477	121.524
339076	70.86	1.9059	5.977		37.2719	19.059	121.484
339277	71.04	1.90714	5.978		37.3665	19.0714	121.504
339477	71.34	1.90763	5.979		37.5243	19.0763	121.524
339677	71.28	1.90905	5.977		37.4928	19.0905	121.484
339878	71.26	1.90986	5.982		37.4823	19.0986	121.585
340078	71.54	1.91066	5.98		37.6295	19.1066	121.545
340279	71	1.91215	5.98		37.3455	19.1215	121.545
340479	71.38	1.91272	5.98		37.5454	19.1272	121.545
340679	71.04	1.91404	5.979		37.3665	19.1404	121.524
340880	71.26	1.91476	5.98		37.4823	19.1476	121.545
341080	71.22	1.91607	5.98		37.4612	19.1607	121.545
341281	71.48	1.91668	5.98		37.598	19.1668	121.545
341481	71.38	1.91772	5.98		37.5454	19.1772	121.545
341681	71.34	1.91903	5.981		37.5243	19.1903	121.565
341883	71.28	1.91975	5.98		37.4928	19.1975	121.545
342084	71.54	1.92106	5.982		37.6295	19.2106	121.585
342284	71.22	1.92187	5.98		37.4612	19.2187	121.545
342485	71.64	1.92243	5.979		37.6821	19.2243	121.524
342685	71.16	1.92389	5.983		37.4297	19.2389	121.606
342885	71.62	1.92483	5.978		37.6716	19.2483	121.504
343086	71.62	1.92483	5.978		37.6716	19.2483	121.504
343286	71.52	1.92667	5.98		37.619	19.2667	121.545
343487	71.42	1.9278	5.98		37.5664	19.278	121.545
343687	71.56	1.92905	5.977		37.6401	19.2905	121.484
343887	71.9	1.92964	5.98		37.8189	19.2964	121.545
344088	71.14	1.931	5.982		37.4191	19.31	121.585
344288	71.42	1.9316	5.98		37.5664	19.316	121.545
344489	71.64	1.93303	5.983		37.6821	19.3303	121.606
344689	71.68	1.93361	5.981		37.7032	19.3361	121.565
344889	71.5	1.93477	5.979		37.6085	19.3477	121.524
345091	71.5	1.93477	5.979		37.6085	19.3477	121.524
345292	71.42	1.9368	5.976		37.5664	19.368	121.463
345492	71.7	1.9379	5.979		37.7137	19.379	121.524
345693	71.88	1.93844	5.979		37.8084	19.3844	121.524
345893	71.98	1.93991	5.98		37.861	19.3991	121.545
346093	71.98	1.94061	5.979		37.861	19.4061	121.524
346294	71.98	1.94151	5.979		37.861	19.4151	121.524
346494	72	1.9427	5.98		37.8715	19.427	121.545
346695	71.84	1.94386	5.977		37.7873	19.4386	121.484
346895	71.66	1.94492	5.98		37.6927	19.4492	121.545
347095	72.16	1.94544	5.98		37.9557	19.4544	121.545
347296	72.16	1.94544	5.98		37.9557	19.4544	121.545
347496	72.16	1.94754	5.98		37.9557	19.4754	121.545
347697	71.42	1.9489	5.978		37.5664	19.489	121.504
347897	71.9	1.94954	5.982		37.8189	19.4954	121.585
348097	71.48	1.95098	5.981		37.598	19.5098	121.565
348299	71.92	1.95163	5.979		37.8294	19.5163	121.524
348500	71.88	1.95284	5.977		37.8084	19.5284	121.484
348700	72.08	1.95347	5.983		37.9136	19.5347	121.606
348901	71.68	1.95471	5.98		37.7032	19.5471	121.545
349101	72.36	1.95537	5.98		38.0608	19.5537	121.545
349301	72.1	1.95656	5.979		37.9241	19.5656	121.524
349502	72.02	1.95769	5.978		37.882	19.5769	121.504
349702	72.24	1.95842	5.978		37.9977	19.5842	121.504
349903	72.24	1.95842	5.978		37.9977	19.5842	121.504
350103	72.34	1.96038	5.979		38.0503	19.6038	121.524
350303	71.92	1.96173	5.979		37.8294	19.6173	121.524
350504	72.42	1.96245	5.979		38.0924	19.6245	121.524
350704	72.38	1.96357	5.982		38.0714	19.6357	121.585
350905	72.1	1.96456	5.98		37.9241	19.6456	121.545
351105	72.48	1.96573	5.978		38.124	19.6573	121.504
351305	72.48	1.96573	5.978		38.124	19.6573	121.504
351507	72.56	1.9678	5.98		38.166	19.678	121.545
351708	72.02	1.96859	5.978		37.882	19.6859	121.504
351908	72.48	1.96953	5.981		38.124	19.6953	121.565
352109	72.48	1.96953	5.981		38.124	19.6953	121.565
352309	72.54	1.97131	5.977		38.1555	19.7131	121.484
352509	72.36	1.97237	5.977		38.0608	19.7237	121.484
352710	72.1	1.97376	5.982		37.9241	19.7376	121.585
352910	71.98	1.97461	5.979		37.861	19.7461	121.524
353111	72.56	1.9756	5.98		38.166	19.756	121.545
353311	72.6	1.97659	5.979		38.1871	19.7659	121.524
353511	72.06	1.97758	5.981		37.9031	19.7758	121.565
353712	72.48	1.97863	5.981		38.124	19.7863	121.565
353912	72.58	1.9794	5.98		38.1766	19.794	121.545
354113	72.58	1.9794	5.98		38.1766	19.794	121.545
354313	72.6	1.98159	5.981		38.1871	19.8159	121.565
354513	72.6	1.98159	5.981		38.1871	19.8159	121.565
354715	72.7	1.98325	5.984		38.2397	19.8325	121.626
354916	72.1	1.98496	5.98		37.9241	19.8496	121.545
355116	72.5	1.98542	5.979		38.1345	19.8542	121.524
355317	72.32	1.98699	5.978		38.0398	19.8699	121.504
355517	72.32	1.98759	5.981		38.0398	19.8759	121.565
355717	72.8	1.98832	5.979		38.2923	19.8832	121.524
355918	72.8	1.98832	5.979		38.2923	19.8832	121.524
356118	72.72	1.99025	5.978		38.2502	19.9025	121.504
356319	72.42	1.99155	5.98		38.0924	19.9155	121.545
356519	72.76	1.99233	5.98		38.2712	19.9233	121.545
356719	72.3	1.99339	5.981		38.0293	19.9339	121.565
356920	72.8	1.99452	5.981		38.2923	19.9452	121.565
357120	72.8	1.99452	5.981		38.2923	19.9452	121.565
357321	73.02	1.99644	5.982		38.408	19.9644	121.585
357521	72.66	1.99737	5.977		38.2186	19.9737	121.484
357721	72.38	1.99877	5.981		38.0714	19.9877	121.565
357922	72.76	1.99933	5.98		38.2712	19.9933	121.545
358122	72.84	2.00071	5.979		38.3133	20.0071	121.524
358323	72.56	2.0014	5.979		38.166	20.014	121.524
358523	73.06	2.00243	5.982		38.429	20.0243	121.585
358723	72.92	2.00348	5.981		38.3554	20.0348	121.565
358925	72.94	2.00457	5.98		38.3659	20.0457	121.545
359126	72.94	2.00527	5.978		38.3659	20.0527	121.504
359326	72.68	2.00646	5.98		38.2292	20.0646	121.545
359527	73.08	2.00722	5.98		38.4396	20.0722	121.545
359727	72.88	2.00839	5.981		38.3344	20.0839	121.565
359927	73.1	2.00922	5.979		38.4501	20.0922	121.524
360128	72.98	2.01036	5.979		38.387	20.1036	121.524
360328	72.92	2.01128	5.982		38.3554	20.1128	121.585
360529	72.96	2.01256	5.981		38.3764	20.1256	121.565
360729	73.02	2.01324	5.978		38.408	20.1324	121.504
360929	72.78	2.01433	5.978		38.2818	20.1433	121.504
361130	72.98	2.01546	5.981		38.387	20.1546	121.565
361330	73.18	2.01619	5.98		38.4922	20.1619	121.545
361531	72.92	2.01728	5.978		38.3554	20.1728	121.504
361731	72.88	2.01859	5.981		38.3344	20.1859	121.565
361931	73.3	2.01924	5.978		38.5553	20.1924	121.504
362133	72.72	2.02045	5.982		38.2502	20.2045	121.585
362334	72.7	2.02166	5.978		38.2397	20.2166	121.504
362534	73.3	2.02215	5.979		38.5553	20.2215	121.524
362735	72.84	2.02331	5.979		38.3133	20.2331	121.524
362935	73.34	2.02423	5.98		38.5763	20.2423	121.545
363135	73.34	2.02423	5.98		38.5763	20.2423	121.545
363336	73.42	2.0261	5.976		38.6184	20.261	121.463
363536	72.84	2.02761	5.981		38.3133	20.2761	121.565
363737	73.28	2.02825	5.978		38.5448	20.2825	121.504
363937	73.26	2.02916	5.983		38.5342	20.2916	121.606
364137	73.16	2.03059	5.98		38.4816	20.3059	121.545
364338	73.26	2.03106	5.981		38.5342	20.3106	121.565
364538	73.06	2.03243	5.98		38.429	20.3243	121.545
364739	73.34	2.03353	5.979		38.5763	20.3353	121.524
364939	73.34	2.03353	5.979		38.5763	20.3353	121.524
365139	73.28	2.03515	5.981		38.5448	20.3515	121.565
365341	73.36	2.03662	5.98		38.5868	20.3662	121.545
365542	73.36	2.03662	5.98		38.5868	20.3662	121.545
365742	73.38	2.03792	5.981		38.5974	20.3792	121.565
365943	73.42	2.0396	5.982		38.6184	20.396	121.585
366143	73.12	2.04031	5.979		38.4606	20.4031	121.524
366343	73.46	2.04109	5.978		38.6394	20.4109	121.504
366544	73.44	2.042	5.977		38.6289	20.42	121.484
366744	73.46	2.04319	5.977		38.6394	20.4319	121.484
366945	73.14	2.0446	5.981		38.4711	20.446	121.565
367145	73.34	2.04523	5.977		38.5763	20.4523	121.484
367345	73.46	2.04659	5.981		38.6394	20.4659	121.565
367546	73.46	2.04659	5.981		38.6394	20.4659	121.565
367746	73.64	2.04803	5.976		38.7341	20.4803	121.463
367947	73.64	2.04803	5.976		38.7341	20.4803	121.463
368147	73.46	2.05009	5.981		38.6394	20.5009	121.565
368347	73.6	2.05134	5.984		38.7131	20.5134	121.626
368549	73.72	2.0522	5.982		38.7762	20.522	121.585
368750	72.88	2.05359	5.981		38.3344	20.5359	121.565
368950	72.98	2.05436	5.979		38.387	20.5436	121.524
369151	73.68	2.05521	5.981		38.7552	20.5521	121.565
369351	73.3	2.05644	5.977		38.5553	20.5644	121.484
369551	73.58	2.05735	5.981		38.7026	20.5735	121.565
369752	73.38	2.05822	5.981		38.5974	20.5822	121.565
369952	73.68	2.05931	5.981		38.7552	20.5931	121.565
370153	73.24	2.06037	5.98		38.5237	20.6037	121.545
370353	73.52	2.06147	5.984		38.671	20.6147	121.626
370553	73.62	2.06213	5.978		38.7236	20.6213	121.504
370754	73.36	2.06342	5.981		38.5868	20.6342	121.565
370954	73.64	2.06443	5.978		38.7341	20.6443	121.504
371155	73.14	2.0655	5.979		38.4711	20.655	121.524
371355	73.54	2.06606	5.98		38.6815	20.6606	121.545
371555	73.86	2.06735	5.982		38.8498	20.6735	121.585
371757	73.86	2.06735	5.982		38.8498	20.6735	121.585
371958	73.9	2.06913	5.98		38.8709	20.6913	121.545
372158	73.76	2.07018	5.98		38.7972	20.7018	121.545
372359	73.88	2.07124	5.978		38.8604	20.7124	121.504
372559	73.82	2.07226	5.978		38.8288	20.7226	121.504
372759	73.96	2.07321	5.98		38.9024	20.7321	121.545
372960	73.78	2.07418	5.98		38.8078	20.7418	121.545
373160	73.96	2.07531	5.979		38.9024	20.7531	121.524
373361	73.96	2.07531	5.979		38.9024	20.7531	121.524
373561	73.96	2.07711	5.979		38.9024	20.7711	121.524
373761	73.64	2.07813	5.981		38.7341	20.7813	121.565
373962	74.04	2.07939	5.981		38.9445	20.7939	121.565
374162	73.9	2.08003	5.979		38.8709	20.8003	121.524
374363	73.66	2.08122	5.978		38.7446	20.8122	121.504
374563	73.84	2.08226	5.981		38.8393	20.8226	121.565
374763	74.14	2.08315	5.981		38.9971	20.8315	121.565
374965	73.76	2.08408	5.978		38.7972	20.8408	121.504
375166	73.84	2.08546	5.976		38.8393	20.8546	121.463
375366	73.56	2.08605	5.98		38.692	20.8605	121.545
375567	74.02	2.08729	5.981		38.934	20.8729	121.565
375767	73.78	2.08818	5.981		38.8078	20.8818	121.565
375967	73.74	2.08929	5.979		38.7867	20.8929	121.524
376168	74.12	2.09026	5.98		38.9866	20.9026	121.545
376368	74.12	2.09026	5.98		38.9866	20.9026	121.545
376569	74.3	2.092	5.977		39.0813	20.92	121.484
376769	73.7	2.0932	5.981		38.7657	20.932	121.565
376969	74.1	2.09387	5.977		38.9761	20.9387	121.484
377170	74.02	2.09539	5.98		38.934	20.9539	121.545
377370	73.54	2.09616	5.976		38.6815	20.9616	121.463
377571	74.32	2.09689	5.977		39.0918	20.9689	121.484
377771	73.82	2.09836	5.982		38.8288	20.9836	121.585
377971	73.78	2.09918	5.98		38.8078	20.9918	121.545
378172	74.28	2.1003	5.981		39.0708	21.003	121.565
378372	73.98	2.10111	5.978		38.913	21.0111	121.504
378573	74.32	2.10209	5.98		39.0918	21.0209	121.545
378773	74.2	2.10313	5.981		39.0287	21.0313	121.565
378973	73.94	2.10432	5.979		38.8919	21.0432	121.524
379175	74.4	2.10486	5.978		39.1339	21.0486	121.504
379376	74.4	2.10486	5.978		39.1339	21.0486	121.504
379576	74.18	2.10694	5.979		39.0182	21.0694	121.524
379777	74.5	2.10823	5.98		39.1865	21.0823	121.545
379977	73.8	2.10937	5.979		38.8183	21.0937	121.524
380177	74.26	2.10981	5.978		39.0602	21.0981	121.504
380378	74.26	2.11121	5.978		39.0602	21.1121	121.504
380578	74.18	2.11204	5.979		39.0182	21.1204	121.524
380779	74.38	2.11317	5.979		39.1234	21.1317	121.524
380979	74.56	2.1139	5.98		39.218	21.139	121.545
381179	74.36	2.11487	5.977		39.1128	21.1487	121.484
381380	74.44	2.11635	5.979		39.1549	21.1635	121.524
381580	74.14	2.11695	5.98		38.9971	21.1695	121.545
381781	74.02	2.11839	5.981		38.934	21.1839	121.565
381981	74.34	2.11868	5.979		39.1023	21.1868	121.524
382181	74.02	2.12039	5.981		38.934	21.2039	121.565
382383	74.38	2.12087	5.978		39.1234	21.2087	121.504
382584	74.44	2.12205	5.981		39.1549	21.2205	121.565
382784	74.46	2.12314	5.978		39.1654	21.2314	121.504
382985	74.44	2.12425	5.981		39.1549	21.2425	121.565
383185	74.7	2.12486	5.978		39.2917	21.2486	121.504
383385	74.26	2.12611	5.981		39.0602	21.2611	121.565
383585	74.58	2.1268	5.98		39.2286	21.268	121.545
383786	74.46	2.12844	5.978		39.1654	21.2844	121.504
383987	74.46	2.12844	5.978		39.1654	21.2844	121.504
384187	74.54	2.12981	5.98		39.2075	21.2981	121.545
384387	74.52	2.13132	5.98		39.197	21.3132	121.545
384588	74.22	2.13202	5.98		39.0392	21.3202	121.545
384788	74.6	2.13309	5.98		39.2391	21.3309	121.545
384989	74.36	2.13397	5.982		39.1128	21.3397	121.585
385189	74.72	2.13505	5.98		39.3022	21.3505	121.545
385389	74.82	2.13591	5.98		39.3548	21.3591	121.545
385591	74.08	2.13727	5.978		38.9656	21.3727	121.504
385792	74.52	2.13772	5.977		39.197	21.3772	121.484
385992	74.96	2.13876	5.979		39.4284	21.3876	121.524
386193	74.4	2.14026	5.978		39.1339	21.4026	121.504
386393	74.8	2.14082	5.982		39.3443	21.4082	121.585
386593	74.74	2.14184	5.976		39.3127	21.4184	121.463
386794	74.56	2.1431	5.98		39.218	21.431	121.545
386994	74.3	2.144	5.977		39.0813	21.44	121.484
387195	74.3	2.144	5.977		39.0813	21.44	121.484
387395	74.42	2.14625	5.98		39.1444	21.4625	121.545
387595	74.42	2.14625	5.98		39.1444	21.4625	121.545
387796	74.36	2.14827	5.98		39.1128	21.4827	121.545
387996	74.36	2.14897	5.977		39.1128	21.4897	121.484
388197	74.36	2.14897	5.977		39.1128	21.4897	121.484
388397	74.36	2.15137	5.98		39.1128	21.5137	121.545
388597	74.72	2.15195	5.979		39.3022	21.5195	121.524
388799	74.88	2.15309	5.982		39.3864	21.5309	121.585
389000	74.72	2.15395	5.979		39.3022	21.5395	121.524
389200	74.96	2.15496	5.982		39.4284	21.5496	121.585
389401	74.64	2.15598	5.979		39.2601	21.5598	121.524
389601	74.8	2.15712	5.982		39.3443	21.5712	121.585
389801	74.86	2.1578	5.978		39.3758	21.578	121.504
390002	75	2.15895	5.977		39.4495	21.5895	121.484
390202	74.82	2.15981	5.98		39.3548	21.5981	121.545
390403	74.88	2.16119	5.98		39.3864	21.6119	121.545
390603	74.56	2.162	5.979		39.218	21.62	121.524
390803	75.14	2.1626	5.978		39.5231	21.626	121.504
391004	75.12	2.16401	5.975		39.5126	21.6401	121.443
391204	75.14	2.1649	5.98		39.5231	21.649	121.545
391405	74.68	2.16586	5.98		39.2812	21.6586	121.545
391605	74.68	2.16586	5.98		39.2812	21.6586	121.545
391805	74.66	2.16817	5.979		39.2706	21.6817	121.524
392007	75.08	2.16882	5.981		39.4915	21.6882	121.565
392208	74.76	2.16983	5.981		39.3232	21.6983	121.565
392408	75.24	2.17087	5.984		39.5757	21.7087	121.626
392609	74.46	2.17224	5.983		39.1654	21.7224	121.606
392809	74.54	2.17311	5.982		39.2075	21.7311	121.585
393009	75.12	2.17381	5.981		39.5126	21.7381	121.565
393210	74.98	2.17476	5.976		39.439	21.7476	121.463
393410	74.98	2.17616	5.978		39.439	21.7616	121.504
393611	74.84	2.17691	5.983		39.3653	21.7691	121.606
393811	75.24	2.17787	5.978		39.5757	21.7787	121.504
394011	74.8	2.17892	5.982		39.3443	21.7892	121.585
394212	74.98	2.18006	5.979		39.439	21.8006	121.524
394412	75.2	2.18068	5.981		39.5547	21.8068	121.565
394613	74.84	2.18231	5.978		39.3653	21.8231	121.504
394813	74.8	2.18282	5.978		39.3443	21.8282	121.504
395013	75.08	2.18422	5.981		39.4915	21.8422	121.565
395215	74.88	2.18489	5.98		39.3864	21.8489	121.545
395416	75.28	2.18585	5.983		39.5967	21.8585	121.606
395616	74.94	2.18687	5.977		39.4179	21.8687	121.484
395817	75.14	2.188	5.982		39.5231	21.88	121.585
396017	75.14	2.188	5.982		39.5231	21.88	121.585
396217	75.32	2.18974	5.979		39.6178	21.8974	121.524
396418	75.16	2.19109	5.982		39.5336	21.9109	121.585
396618	74.86	2.1918	5.98		39.3758	21.918	121.545
396819	75.36	2.19282	5.981		39.6388	21.9282	121.565
397019	74.76	2.19403	5.979		39.3232	21.9403	121.524
397219	74.9	2.19478	5.98		39.3969	21.9478	121.545
397420	75.32	2.19594	5.982		39.6178	21.9594	121.585
397620	75.32	2.19594	5.982		39.6178	21.9594	121.585
397821	75.36	2.19782	5.98		39.6388	21.9782	121.545
398021	74.88	2.19899	5.977		39.3864	21.9899	121.484
398221	74.88	2.19899	5.977		39.3864	21.9899	121.484
398422	74.46	2.20124	5.982		39.1654	22.0124	121.585
398622	75.24	2.20167	5.977		39.5757	22.0167	121.484
398823	75.5	2.20288	5.978		39.7125	22.0288	121.504
399024	75.5	2.20288	5.978		39.7125	22.0288	121.504
[truncated: 1,250 more rows]

## Sheet: A-9-9B
Time: 19:21:28,07/04/2019
diameter: 49.4	mm	height: 99.8	mm
Vertical 100kN force sensor (vertical force of test piece)
Control mode: force / confining pressure	waveform: slope
KN/s	Force end point: 17.900 kN	KN	confining pressure rate: 0.500	MPa/s	confining pressure end point: 9.0010	MPa
time (ms)	vertical force (KN)	vertical deformation (mm)	confining pressure (MPa)		Stress (MPa)	axial strain	transverse strain
0	0	0	0		0	0	0
200	0	0	0		0	0	0
400	0	0	0		0	0	0
600	0.32	-0.00011	0		0.166958	-0.0011022	0
800	0.56	-0.0002	0.008		0.292176	-0.00200401	0.161943
1000	0.64	-0.00022	0.016		0.333915	-0.00220441	0.323887
1200	0.78	-0.00027	0.029		0.406959	-0.00270541	0.587045
1400	1.08	-0.00038	0.048		0.563482	-0.00380762	0.97166
1600	1.26	-0.00044	0.074		0.657396	-0.00440882	1.49798
1800	1.48	-0.00052	0.109		0.772179	-0.00521042	2.20648
2000	1.64	-0.00057	0.155		0.855658	-0.00571142	3.13765
2200	1.94	-0.00068	0.209		1.01218	-0.00681363	4.23077
2400	2.02	-0.00071	0.252		1.05392	-0.00711423	5.10121
2600	2.22	-0.00078	0.294		1.15827	-0.00781563	5.95142
2800	2.4	-0.00084	0.335		1.25218	-0.00841683	6.78138
3000	2.56	-0.0009	0.367		1.33566	-0.00901804	7.42915
3200	2.82	0.00401	0.393		1.47131	0.0401804	7.95547
3400	3.02	0.01154	0.416		1.57566	0.115631	8.42105
3600	3.24	0.01937	0.435		1.69045	0.194088	8.80567
3800	3.58	0.02725	0.469		1.86784	0.273046	9.49393
4000	3.7	0.03461	0.506		1.93045	0.346794	10.2429
4200	4.04	0.04239	0.568		2.10784	0.424749	11.498
4400	4.22	0.05082	0.67		2.20175	0.509218	13.5628
4600	4.42	0.05705	0.858		2.3061	0.571643	17.3684
4800	4.54	0.05841	1.298		2.36871	0.585271	26.2753
5000	4.82	0.05831	1.974		2.5148	0.584269	39.9595
5200	4.86	0.0585	2.275		2.53567	0.586172	46.0526
5400	4.96	0.05996	2.519		2.58784	0.600802	50.9919
5600	5.28	0.06395	2.816		2.7548	0.640782	57.004
5800	5.56	0.06955	2.876		2.90089	0.696894	58.2186
6000	5.76	0.07518	2.959		3.00524	0.753307	59.8988
6200	5.94	0.08082	3.069		3.09915	0.80982	62.1255
6400	6.18	0.08654	3.165		3.22437	0.867134	64.0688
6600	6.38	0.09237	3.262		3.32872	0.925551	66.0324
6800	6.5	0.09792	3.362		3.39133	0.981162	68.0567
7000	6.78	0.10363	3.464		3.53741	1.03838	70.1215
7200	7.08	0.10942	3.567		3.69394	1.09639	72.2065
7400	7.3	0.11495	3.666		3.80872	1.1518	74.2105
7600	7.38	0.11972	3.765		3.85046	1.1996	76.2146
7800	7.6	0.12394	3.864		3.96524	1.24188	78.2186
8000	7.68	0.12801	3.964		4.00698	1.28267	80.2429
8200	7.8	0.13217	4.061		4.06959	1.32435	82.2065
8400	7.98	0.13641	4.163		4.16351	1.36683	84.2713
8600	8.16	0.14064	4.264		4.25742	1.40922	86.3158
8800	8.38	0.14527	4.365		4.3722	1.45561	88.3603
9000	8.6	0.15119	4.465		4.48699	1.51493	90.3846
9200	8.94	0.15827	4.564		4.66438	1.58587	92.3887
9400	9.18	0.16519	4.666		4.7896	1.65521	94.4534
9600	9.44	0.1719	4.764		4.92525	1.72244	96.4372
9800	9.48	0.17598	4.863		4.94612	1.76333	98.4413
10000	9.56	0.17785	4.965		4.98786	1.78206	100.506
10200	9.78	0.18238	5.066		5.10264	1.82745	102.551
10400	10.2	0.18973	5.163		5.32177	1.9011	104.514
10600	10.42	0.19695	5.264		5.43656	1.97345	106.559
10800	10.54	0.20341	5.364		5.49917	2.03818	108.583
11000	10.74	0.20794	5.463		5.60351	2.08357	110.587
11200	10.92	0.21208	5.561		5.69743	2.12505	112.571
11400	11.04	0.21624	5.665		5.76004	2.16673	114.676
11600	11.18	0.22049	5.765		5.83308	2.20932	116.7
11800	11.4	0.22501	5.863		5.94786	2.25461	118.684
12000	11.6	0.22964	5.961		6.05221	2.301	120.668
12200	11.74	0.23439	6.063		6.12526	2.3486	122.733
12400	12.04	0.23939	6.163		6.28178	2.3987	124.757
12600	12.22	0.24452	6.263		6.37569	2.4501	126.781
12800	12.54	0.24961	6.364		6.54265	2.5011	128.826
13000	12.62	0.25468	6.463		6.58439	2.5519	130.83
13200	12.8	0.26002	6.565		6.6783	2.60541	132.895
13400	13.08	0.26542	6.662		6.82439	2.65952	134.858
13600	13.34	0.27093	6.762		6.96005	2.71473	136.883
13800	13.62	0.27633	6.864		7.10613	2.76884	138.947
14000	13.9	0.28164	6.964		7.25222	2.82204	140.972
14200	14.06	0.28738	7.06		7.3357	2.87956	142.915
14400	14.26	0.29251	7.163		7.44005	2.93096	145
14600	14.42	0.29725	7.26		7.52353	2.97846	146.964
14800	14.52	0.30032	7.361		7.5757	3.00922	149.008
15000	14.64	0.30258	7.461		7.63831	3.03186	151.032
15200	14.76	0.30503	7.56		7.70092	3.05641	153.036
15400	14.96	0.30806	7.648		7.80527	3.08677	154.818
15600	15.32	0.31314	7.766		7.9931	3.13768	157.206
15800	15.58	0.31875	7.862		8.12875	3.19389	159.15
16000	15.82	0.32406	7.961		8.25397	3.24709	161.154
16200	16.16	0.32944	8.061		8.43136	3.301	163.178
16400	16.14	0.33165	8.161		8.42092	3.32315	165.202
16600	16.08	0.33277	8.264		8.38962	3.33437	167.287
16800	16.56	0.3381	8.362		8.64006	3.38778	169.271
17000	17.02	0.34664	8.462		8.88006	3.47335	171.296
17200	16.7	0.34745	8.561		8.7131	3.48146	173.3
17400	16.94	0.34897	8.664		8.83832	3.49669	175.385
17600	17.26	0.35246	8.759		9.00528	3.53166	177.308
17800	17.34	0.35613	8.862		9.04702	3.56844	179.393
18000	17.62	0.36053	8.96		9.1931	3.61253	181.377
18200	17.9	0.36533	9.001		9.33919	3.66062	182.206
控制模式:围压	波形:斜坡				#VALUE!	0	0
MPa/s	终点:9.0030	MPa			#VALUE!	#VALUE!	0
时间(ms)	垂直力(KN)	垂直变形(mm)	围压(MPa)		#VALUE!	#VALUE!	#VALUE!
18224	17.94	0.36602	9.003		9.36006	3.66754	182.247
控制模式:位移	波形:斜坡				#VALUE!	0	0
mm/s	终点:3.9699	mm			#VALUE!	#VALUE!	0
时间(ms)	垂直力(KN)	垂直变形(mm)	围压(MPa)		#VALUE!	#VALUE!	#VALUE!
18256	17.96	0.36621	9		9.3705	3.66944	182.186
18457	15.48	0.36858	8.981		8.07657	3.69319	181.802
18657	15.94	0.36812	8.98		8.31658	3.68858	181.781
18857	16.9	0.37129	8.979		8.81745	3.72034	181.761
19057	17.16	0.36909	8.981		8.9531	3.6983	181.802
19259	17.16	0.36909	8.981		8.9531	3.6983	181.802
19460	17.54	0.37126	8.98		9.15136	3.72004	181.781
19661	17.54	0.37126	8.98		9.15136	3.72004	181.781
19861	17.56	0.37325	8.978		9.1618	3.73998	181.741
20061	17.56	0.37325	8.978		9.1618	3.73998	181.741
20261	17.8	0.37527	8.98		9.28702	3.76022	181.781
20462	17.8	0.37527	8.98		9.28702	3.76022	181.781
20663	17.66	0.37722	8.98		9.21397	3.77976	181.781
20863	17.66	0.37722	8.98		9.21397	3.77976	181.781
21063	17.28	0.37955	8.982		9.01571	3.80311	181.822
21263	17.28	0.37955	8.982		9.01571	3.80311	181.822
21464	16.64	0.38188	8.978		8.6818	3.82645	181.741
21665	16.42	0.38525	8.979		8.56701	3.86022	181.761
21865	16.74	0.38374	8.982		8.73397	3.84509	181.822
22065	16.66	0.38667	8.977		8.69223	3.87445	181.721
22265	16.66	0.38667	8.977		8.69223	3.87445	181.721
22467	16.66	0.38667	8.977		8.69223	3.87445	181.721
22668	16.66	0.38667	8.977		8.69223	3.87445	181.721
22869	16.66	0.38667	8.977		8.69223	3.87445	181.721
23069	16.66	0.38667	8.977		8.69223	3.87445	181.721
23269	16.66	0.38667	8.977		8.69223	3.87445	181.721
23469	16.28	0.3939	8.977		8.49397	3.94689	181.721
23670	16.5	0.39312	8.983		8.60875	3.93908	181.842
23871	16.5	0.39312	8.983		8.60875	3.93908	181.842
24071	16.5	0.39312	8.983		8.60875	3.93908	181.842
24271	16.5	0.39312	8.983		8.60875	3.93908	181.842
24471	16.5	0.39312	8.983		8.60875	3.93908	181.842
24672	16.5	0.39312	8.983		8.60875	3.93908	181.842
24873	16.1	0.40056	8.978		8.40005	4.01363	181.741
25073	17.08	0.39992	8.981		8.91136	4.00721	181.802
25273	17.08	0.39992	8.981		8.91136	4.00721	181.802
25473	17.08	0.39992	8.981		8.91136	4.00721	181.802
25675	17.08	0.39992	8.981		8.91136	4.00721	181.802
25875	17.08	0.39992	8.981		8.91136	4.00721	181.802
26075	17.08	0.39992	8.981		8.91136	4.00721	181.802
26275	17.08	0.39992	8.981		8.91136	4.00721	181.802
26475	17.44	0.4067	8.98		9.09919	4.07515	181.781
26675	17.44	0.4067	8.98		9.09919	4.07515	181.781
26875	17.44	0.4067	8.98		9.09919	4.07515	181.781
27075	17.44	0.4067	8.98		9.09919	4.07515	181.781
27275	17.44	0.4067	8.98		9.09919	4.07515	181.781
27475	17.44	0.4067	8.98		9.09919	4.07515	181.781
27675	17.44	0.4067	8.98		9.09919	4.07515	181.781
27875	17.66	0.41362	8.981		9.21397	4.14449	181.802
28075	17.66	0.41362	8.981		9.21397	4.14449	181.802
28275	17.66	0.41362	8.981		9.21397	4.14449	181.802
28475	17.66	0.41362	8.981		9.21397	4.14449	181.802
28675	17.66	0.41362	8.981		9.21397	4.14449	181.802
28875	17.66	0.41362	8.981		9.21397	4.14449	181.802
29075	17.4	0.42141	8.977		9.07832	4.22255	181.721
29275	18.2	0.42113	8.973		9.49571	4.21974	181.64
29475	18.2	0.42113	8.973		9.49571	4.21974	181.64
29675	18.76	0.42343	8.979		9.78789	4.24279	181.761
29875	19.48	0.42418	8.98		10.1635	4.2503	181.781
30075	19.06	0.42523	8.979		9.94441	4.26082	181.761
30275	19.5	0.42638	8.979		10.174	4.27234	181.761
30475	19.98	0.42651	8.978		10.4244	4.27365	181.741
30675	19.96	0.42751	8.98		10.414	4.28367	181.781
30875	19.98	0.42831	8.98		10.4244	4.29168	181.781
31075	19.44	0.4293	8.978		10.1427	4.3016	181.741
31275	19.32	0.43064	8.981		10.0801	4.31503	181.802
31475	19.08	0.43172	8.981		9.95485	4.32585	181.802
31675	19.18	0.43289	8.978		10.007	4.33758	181.741
31875	19.24	0.43417	8.979		10.0383	4.3504	181.761
32075	20.14	0.43495	8.98		10.5079	4.35822	181.781
32275	20.32	0.43519	8.979		10.6018	4.36062	181.761
32475	20.1	0.43627	8.981		10.487	4.37144	181.802
32675	19.52	0.43747	8.979		10.1844	4.38347	181.761
32875	19.74	0.43849	8.981		10.2992	4.39369	181.802
33075	19.74	0.43849	8.981		10.2992	4.39369	181.802
33275	19.96	0.44081	8.978		10.414	4.41693	181.741
33475	19.74	0.44229	8.979		10.2992	4.43176	181.761
33675	20.56	0.4424	8.978		10.727	4.43287	181.741
33875	20.34	0.44408	8.981		10.6122	4.4497	181.802
34075	20.6	0.44429	8.982		10.7479	4.4518	181.822
34275	20.66	0.44587	8.977		10.7792	4.46764	181.721
34475	20.78	0.44613	8.981		10.8418	4.47024	181.802
34675	20.7	0.44695	8.981		10.8001	4.47846	181.802
34875	20.14	0.44805	8.978		10.5079	4.48948	181.741
35075	20.54	0.44921	8.981		10.7166	4.5011	181.802
35275	20.54	0.44921	8.981		10.7166	4.5011	181.802
35475	20.82	0.45111	8.981		10.8627	4.52014	181.802
35675	20.7	0.45206	8.981		10.8001	4.52966	181.802
35875	20.3	0.453	8.979		10.5914	4.53908	181.761
36075	20.36	0.45437	8.976		10.6227	4.55281	181.7
36275	20.36	0.45437	8.976		10.6227	4.55281	181.7
36475	20.72	0.45665	8.978		10.8105	4.57565	181.741
36675	21.16	0.45769	8.979		11.0401	4.58607	181.761
36875	21.48	0.45778	8.98		11.207	4.58697	181.781
37075	21.42	0.4587	8.979		11.1757	4.59619	181.761
37275	20.94	0.45977	8.98		10.9253	4.60691	181.781
37475	20.74	0.46104	8.982		10.8209	4.61964	181.822
37675	20.54	0.46211	8.982		10.7166	4.63036	181.822
37875	20.34	0.46348	8.977		10.6122	4.64409	181.721
38075	20.66	0.46477	8.976		10.7792	4.65701	181.7
38275	21.48	0.46568	8.978		11.207	4.66613	181.741
38475	21.82	0.46596	8.981		11.3844	4.66894	181.802
38675	21.96	0.46691	8.978		11.4575	4.67846	181.741
38875	21.86	0.46815	8.978		11.4053	4.69088	181.741
39075	21.94	0.46862	8.978		11.447	4.69559	181.741
39275	21.54	0.46966	8.979		11.2383	4.70601	181.761
39475	21.54	0.46966	8.979		11.2383	4.70601	181.761
39675	21.56	0.47185	8.978		11.2488	4.72796	181.741
39875	21.22	0.47287	8.983		11.0714	4.73818	181.842
40075	20.68	0.47416	8.981		10.7896	4.7511	181.802
40275	20.96	0.47536	8.976		10.9357	4.76313	181.7
40475	21.6	0.47634	8.978		11.2696	4.77295	181.741
40675	22.22	0.47732	8.982		11.5931	4.78277	181.822
40875	22.42	0.47755	8.979		11.6975	4.78507	181.761
41075	22.4	0.47836	8.98		11.687	4.79319	181.781
41275	21.92	0.47953	8.979		11.4366	4.80491	181.761
41475	21.66	0.48062	8.983		11.3009	4.81583	181.842
41675	21.28	0.48195	8.977		11.1027	4.82916	181.721
41875	21.44	0.4831	8.982		11.1862	4.84068	181.822
42075	21.38	0.48432	8.981		11.1549	4.85291	181.802
42275	22.4	0.48516	8.979		11.687	4.86132	181.761
42475	22.82	0.48591	8.98		11.9062	4.86884	181.781
42675	22.74	0.48624	8.98		11.8644	4.87214	181.781
42875	22.2	0.48743	8.979		11.5827	4.88407	181.761
43075	21.82	0.48856	8.979		11.3844	4.89539	181.761
43275	21.34	0.48993	8.98		11.134	4.90912	181.781
43475	21.54	0.49126	8.979		11.2383	4.92244	181.761
43675	22.72	0.49205	8.981		11.854	4.93036	181.802
43875	23.14	0.4925	8.981		12.0731	4.93487	181.802
44075	22.86	0.4931	8.981		11.927	4.94088	181.802
44275	23.04	0.49414	8.982		12.0209	4.9513	181.822
44475	22.14	0.49545	8.98		11.5514	4.96443	181.781
44675	21.78	0.49698	8.98		11.3636	4.97976	181.781
44875	21.7	0.4984	8.979		11.3218	4.99399	181.761
45075	23.2	0.49858	8.982		12.1044	4.99579	181.822
45275	23.44	0.4991	8.979		12.2296	5.001	181.761
45475	23.02	0.49994	8.98		12.0105	5.00942	181.781
45675	22.74	0.50134	8.98		11.8644	5.02345	181.781
45875	22.1	0.50247	8.982		11.5305	5.03477	181.822
46075	22.22	0.50382	8.982		11.5931	5.0483	181.822
46275	22.28	0.5052	8.98		11.6244	5.06212	181.781
46475	23.34	0.50573	8.982		12.1775	5.06743	181.822
46675	23.36	0.50682	8.979		12.1879	5.07836	181.761
46875	23.7	0.50691	8.981		12.3653	5.07926	181.802
47075	23.36	0.50792	8.981		12.1879	5.08938	181.802
47275	23.04	0.50914	8.978		12.0209	5.1016	181.741
47475	22.72	0.51035	8.98		11.854	5.11373	181.781
47675	23.02	0.51134	8.979		12.0105	5.12365	181.761
47875	23.02	0.51134	8.979		12.0105	5.12365	181.761
48075	23.18	0.51359	8.982		12.094	5.14619	181.822
48275	23.24	0.51477	8.98		12.1253	5.15802	181.781
48475	23.68	0.51571	8.98		12.3549	5.16743	181.781
48675	24.04	0.51599	8.98		12.5427	5.17024	181.781
48875	24.12	0.51666	8.98		12.5844	5.17695	181.781
49075	23.74	0.51779	8.982		12.3862	5.18828	181.822
49275	23.3	0.51915	8.98		12.1566	5.2019	181.781
49475	22.94	0.52037	8.978		11.9688	5.21413	181.741
49675	23.2	0.52138	8.979		12.1044	5.22425	181.761
49875	23.36	0.52242	8.979		12.1879	5.23467	181.761
50075	23.58	0.52365	8.98		12.3027	5.24699	181.781
50275	24.12	0.52446	8.979		12.5844	5.25511	181.761
50475	24.44	0.52505	8.981		12.7514	5.26102	181.802
50675	24.54	0.52561	8.979		12.8036	5.26663	181.761
50875	24.56	0.5266	8.983		12.814	5.27655	181.842
51075	24.26	0.52761	8.978		12.6575	5.28667	181.741
51275	24.04	0.52879	8.979		12.5427	5.2985	181.761
51475	24.16	0.52974	8.983		12.6053	5.30802	181.842
51675	24.06	0.53078	8.979		12.5531	5.31844	181.761
51875	23.66	0.53192	8.979		12.3444	5.32986	181.761
52075	24.22	0.53282	8.978		12.6366	5.33888	181.741
52275	23.9	0.53394	8.976		12.4696	5.3501	181.7
52475	23.76	0.53508	8.979		12.3966	5.36152	181.761
52675	23.8	0.53607	8.98		12.4175	5.37144	181.781
52875	24.1	0.53727	8.977		12.574	5.38347	181.721
53075	24.02	0.53849	8.978		12.5323	5.39569	181.741
53275	24.02	0.53849	8.978		12.5323	5.39569	181.741
53475	24.28	0.5401	8.98		12.6679	5.41182	181.781
53675	24.42	0.54125	8.98		12.741	5.42335	181.781
53875	24.66	0.54227	8.979		12.8662	5.43357	181.761
54075	24.78	0.54333	8.976		12.9288	5.44419	181.7
54275	25.3	0.54395	8.978		13.2001	5.4504	181.741
54475	25.38	0.54492	8.975		13.2418	5.46012	181.68
54675	25.14	0.5461	8.979		13.1166	5.47194	181.761
54875	25.52	0.54667	8.977		13.3149	5.47766	181.721
55075	25.6	0.54774	8.979		13.3566	5.48838	181.761
55275	25.82	0.54836	8.979		13.4714	5.49459	181.761
55475	25.74	0.54929	8.983		13.4297	5.50391	181.842
55675	25.44	0.5511	8.98		13.2731	5.52204	181.781
55875	25.72	0.5516	8.98		13.4192	5.52705	181.781
56075	25.94	0.55232	8.977		13.534	5.53427	181.721
56275	25.98	0.55321	8.98		13.5549	5.54319	181.781
56475	26.04	0.55419	8.98		13.5862	5.55301	181.781
56675	26.08	0.55537	8.979		13.607	5.56483	181.761
56875	26.14	0.55635	8.979		13.6383	5.57465	181.761
57075	26.02	0.55759	8.98		13.5757	5.58707	181.781
57275	26.12	0.55856	8.979		13.6279	5.59679	181.761
57475	26.18	0.55924	8.98		13.6592	5.60361	181.781
57675	26.2	0.56023	8.979		13.6697	5.61353	181.761
57875	26.2	0.56093	8.979		13.6697	5.62054	181.761
58075	26.4	0.56186	8.982		13.774	5.62986	181.822
58275	26.4	0.56296	8.979		13.774	5.64088	181.761
58475	26.24	0.56442	8.979		13.6905	5.65551	181.761
58675	26.24	0.56442	8.979		13.6905	5.65551	181.761
58875	26.28	0.5666	8.982		13.7114	5.67735	181.822
59075	26.24	0.56762	8.981		13.6905	5.68758	181.802
59275	26.5	0.56842	8.981		13.8262	5.69559	181.802
59475	26.38	0.56977	8.981		13.7636	5.70912	181.802
59675	26.58	0.5703	8.978		13.8679	5.71443	181.741
59875	26	0.5715	8.977		13.5653	5.72645	181.721
60075	25.98	0.57261	8.976		13.5549	5.73758	181.7
60275	26.18	0.57354	8.98		13.6592	5.74689	181.781
60475	25.76	0.57458	8.982		13.4401	5.75731	181.822
60675	25.96	0.57551	8.979		13.5444	5.76663	181.761
60875	26.04	0.57659	8.981		13.5862	5.77745	181.802
61075	26.16	0.57734	8.977		13.6488	5.78497	181.721
61275	26.2	0.57833	8.982		13.6697	5.79489	181.822
61475	26.14	0.57935	8.976		13.6383	5.80511	181.7
61675	26.24	0.58022	8.977		13.6905	5.81383	181.721
61875	26.2	0.58113	8.977		13.6697	5.82295	181.721
62075	26.28	0.5822	8.976		13.7114	5.83367	181.7
62275	26.5	0.58292	8.978		13.8262	5.84088	181.741
62475	26.82	0.58381	8.979		13.9931	5.8498	181.761
62675	26.82	0.58471	8.98		13.9931	5.85882	181.781
62875	27.08	0.58562	8.979		14.1288	5.86794	181.761
63075	27.5	0.58657	8.979		14.3479	5.87745	181.761
63275	27.64	0.58743	8.981		14.421	5.88607	181.802
63475	27.74	0.58839	8.98		14.4731	5.89569	181.781
63675	27.82	0.58926	8.981		14.5149	5.90441	181.802
63875	27.86	0.59035	8.98		14.5357	5.91533	181.781
64075	27.84	0.59166	8.981		14.5253	5.92846	181.802
64275	27.86	0.59285	8.981		14.5357	5.94038	181.802
64475	27.94	0.59372	8.979		14.5775	5.9491	181.761
64675	27.92	0.59483	8.981		14.5671	5.96022	181.802
64875	27.8	0.59597	8.979		14.5044	5.97164	181.761
65075	27.52	0.59717	8.981		14.3584	5.98367	181.802
65275	27.88	0.59774	8.98		14.5462	5.98938	181.781
65475	27.44	0.5984	8.979		14.3166	5.99599	181.761
65675	27.74	0.59949	8.981		14.4731	6.00691	181.802
65875	27.84	0.60026	8.979		14.5253	6.01463	181.761
66075	28.02	0.60119	8.979		14.6192	6.02395	181.761
66275	28.26	0.60211	8.979		14.7444	6.03317	181.761
66475	28.42	0.60305	8.978		14.8279	6.04259	181.741
66675	28.58	0.6041	8.981		14.9114	6.05311	181.802
66875	28.52	0.60502	8.98		14.8801	6.06232	181.781
67075	28.6	0.60599	8.977		14.9218	6.07204	181.721
67275	28.78	0.60703	8.978		15.0157	6.08246	181.741
67475	28.64	0.60798	8.977		14.9427	6.09198	181.721
67675	28.72	0.60905	8.978		14.9844	6.10271	181.741
67875	28.84	0.61011	8.98		15.0471	6.11333	181.781
68075	28.74	0.61104	8.98		14.9949	6.12265	181.781
68275	28.92	0.61188	8.982		15.0888	6.13106	181.822
68475	28.94	0.61297	8.979		15.0992	6.14198	181.761
68675	29.14	0.614	8.98		15.2036	6.1523	181.781
68875	29.12	0.61501	8.983		15.1931	6.16242	181.842
69075	29.24	0.61607	8.979		15.2558	6.17305	181.761
69275	29.26	0.61686	8.979		15.2662	6.18096	181.761
69475	29.22	0.61787	8.98		15.2453	6.19108	181.781
69675	29.22	0.61877	8.98		15.2453	6.2001	181.781
69875	29.02	0.61984	8.979		15.141	6.21082	181.761
70075	28.98	0.62086	8.977		15.1201	6.22104	181.721
70275	28.58	0.6221	8.98		14.9114	6.23347	181.781
70475	28.9	0.62288	8.98		15.0784	6.24128	181.781
70675	28.72	0.62415	8.981		14.9844	6.25401	181.802
70875	28.74	0.62494	8.981		14.9949	6.26192	181.802
71075	29.36	0.62572	8.981		15.3184	6.26974	181.802
71275	29.32	0.62674	8.977		15.2975	6.27996	181.721
71475	29.32	0.62764	8.979		15.2975	6.28898	181.761
71675	29.52	0.62857	8.98		15.4018	6.2983	181.781
71875	29.68	0.62961	8.98		15.4853	6.30872	181.781
72075	29.76	0.63068	8.98		15.5271	6.31944	181.781
72275	29.96	0.63171	8.982		15.6314	6.32976	181.822
72475	30	0.6327	8.978		15.6523	6.33968	181.741
72675	30	0.6338	8.977		15.6523	6.3507	181.721
72875	30.06	0.63458	8.98		15.6836	6.35852	181.781
73075	30.1	0.63566	8.98		15.7044	6.36934	181.781
73275	30.02	0.63699	8.979		15.6627	6.38267	181.761
73475	29.7	0.63841	8.979		15.4958	6.39689	181.761
73675	29.92	0.63923	8.981		15.6105	6.40511	181.802
73875	30.12	0.64006	8.981		15.7149	6.41343	181.802
74075	30.2	0.64093	8.978		15.7566	6.42214	181.741
74275	30.26	0.64181	8.979		15.7879	6.43096	181.761
74475	30.32	0.64329	8.978		15.8192	6.44579	181.741
74675	30.38	0.64357	8.983		15.8505	6.4486	181.842
74875	30.38	0.64507	8.979		15.8505	6.46363	181.761
75075	30.4	0.64606	8.98		15.861	6.47355	181.781
75275	30.38	0.64697	8.979		15.8505	6.48267	181.761
75475	29.98	0.64811	8.979		15.6418	6.49409	181.761
75675	29.84	0.64916	8.981		15.5688	6.50461	181.802
75875	30.22	0.64992	8.977		15.7671	6.51222	181.721
76075	29.9	0.65103	8.977		15.6001	6.52335	181.721
76275	29.98	0.65211	8.977		15.6418	6.53417	181.721
76475	29.96	0.65301	8.977		15.6314	6.54319	181.721
76675	29.92	0.65403	8.98		15.6105	6.55341	181.781
76875	30.14	0.65485	8.979		15.7253	6.56162	181.761
77075	30.04	0.65579	8.981		15.6731	6.57104	181.802
77275	29.86	0.65675	8.977		15.5792	6.58066	181.721
77475	30.08	0.65757	8.979		15.694	6.58888	181.761
77675	30.58	0.6585	8.979		15.9549	6.5982	181.761
77875	30.56	0.6593	8.978		15.9445	6.60621	181.741
78075	30.54	0.66031	8.981		15.934	6.61633	181.802
78275	30.58	0.6614	8.982		15.9549	6.62725	181.822
78475	30.6	0.66239	8.98		15.9653	6.63717	181.781
78675	30.5	0.66333	8.98		15.9131	6.64659	181.781
78875	30.6	0.66439	8.983		15.9653	6.65721	181.842
79075	30.82	0.66511	8.979		16.0801	6.66443	181.761
79275	30.42	0.66645	8.98		15.8714	6.67786	181.781
79475	30.92	0.66718	8.98		16.1323	6.68517	181.781
79675	31.18	0.66809	8.979		16.2679	6.69429	181.761
79875	30.92	0.66908	8.981		16.1323	6.70421	181.802
80075	31.3	0.67005	8.977		16.3305	6.71393	181.721
80275	31.54	0.67096	8.978		16.4558	6.72305	181.741
80475	31.46	0.67189	8.984		16.414	6.73236	181.862
80675	31.62	0.67293	8.977		16.4975	6.74279	181.721
80875	31.66	0.67382	8.979		16.5184	6.7517	181.761
81075	31.76	0.67478	8.98		16.5705	6.76132	181.781
81275	31.78	0.67588	8.98		16.581	6.77234	181.781
81475	32.04	0.67669	8.979		16.7166	6.78046	181.761
81675	32.06	0.67768	8.981		16.7271	6.79038	181.802
81875	32.18	0.67884	8.981		16.7897	6.802	181.802
82075	32.18	0.68014	8.979		16.7897	6.81503	181.761
82275	32.04	0.68149	8.978		16.7166	6.82856	181.741
82475	31.84	0.68236	8.98		16.6123	6.83727	181.781
82675	31.32	0.68334	8.98		16.341	6.84709	181.781
82875	31.78	0.68408	8.979		16.581	6.85451	181.761
83075	32.02	0.68489	8.978		16.7062	6.86263	181.741
83275	32.2	0.68573	8.975		16.8001	6.87104	181.68
83475	32.34	0.68658	8.981		16.8732	6.87956	181.802
83675	32.64	0.68748	8.981		17.0297	6.88858	181.802
83875	32.7	0.68866	8.977		17.061	6.9004	181.721
84075	32.66	0.68987	8.979		17.0401	6.91253	181.761
84275	32.54	0.69131	8.981		16.9775	6.92695	181.802
84475	32.28	0.692	8.977		16.8418	6.93387	181.721
84675	32.28	0.692	8.977		16.8418	6.93387	181.721
84875	32.34	0.69378	8.979		16.8732	6.9517	181.761
85075	32.8	0.69452	8.979		17.1132	6.95912	181.761
85275	32.98	0.69536	8.979		17.2071	6.96754	181.761
85475	33.1	0.69652	8.98		17.2697	6.97916	181.781
85675	33.04	0.69774	8.979		17.2384	6.99138	181.761
85875	32.32	0.69919	8.979		16.8627	7.00591	181.761
86075	32.38	0.69997	8.976		16.894	7.01373	181.7
86275	32.34	0.70078	8.978		16.8732	7.02184	181.741
86475	32.8	0.70142	8.981		17.1132	7.02826	181.802
86675	33.38	0.70222	8.977		17.4158	7.03627	181.721
86875	33.52	0.70337	8.979		17.4888	7.0478	181.761
87075	33.1	0.70491	8.978		17.2697	7.06323	181.741
87275	33.02	0.70574	8.977		17.2279	7.07154	181.721
87475	33.02	0.70634	8.979		17.2279	7.07756	181.761
87675	33.5	0.70718	8.981		17.4784	7.08597	181.802
87875	33.56	0.70835	8.981		17.5097	7.0977	181.802
88075	33.26	0.70966	8.978		17.3532	7.11082	181.741
88275	33.06	0.71053	8.979		17.2488	7.11954	181.761
88475	33.38	0.71122	8.978		17.4158	7.12645	181.741
88675	33.84	0.71216	8.978		17.6558	7.13587	181.741
88875	33.84	0.71346	8.982		17.6558	7.1489	181.822
89075	33.4	0.71481	8.979		17.4262	7.16242	181.761
89275	33.1	0.71552	8.979		17.2697	7.16954	181.761
89475	33.22	0.71647	8.979		17.3323	7.17906	181.761
89675	33.74	0.71719	8.975		17.6036	7.18627	181.68
89875	33.82	0.71796	8.98		17.6453	7.19399	181.781
90075	34.2	0.71883	8.981		17.8436	7.20271	181.802
90275	34.32	0.72019	8.981		17.9062	7.21633	181.802
90475	34.16	0.72144	8.979		17.8227	7.22886	181.761
90675	33.72	0.7224	8.979		17.5932	7.23848	181.761
90875	33.9	0.72323	8.983		17.6871	7.24679	181.842
91075	34.42	0.72385	8.979		17.9584	7.25301	181.761
91275	34.68	0.72486	8.982		18.094	7.26313	181.822
91475	34.48	0.72633	8.977		17.9897	7.27786	181.721
91675	33.94	0.72742	8.979		17.7079	7.28878	181.761
91875	33.86	0.72815	8.978		17.6662	7.29609	181.741
92075	34.62	0.72878	8.981		18.0627	7.3024	181.802
92275	34.52	0.73022	8.98		18.0106	7.31683	181.781
92475	34.06	0.73118	8.979		17.7705	7.32645	181.761
92675	34.74	0.73164	8.98		18.1253	7.33106	181.781
92875	34.96	0.73286	8.979		18.2401	7.34329	181.761
93075	34.68	0.73416	8.98		18.094	7.35631	181.781
93275	34.68	0.73476	8.981		18.094	7.36232	181.802
93475	35.06	0.73563	8.982		18.2923	7.37104	181.822
93675	35.14	0.7368	8.978		18.334	7.38277	181.741
93875	34.64	0.73828	8.978		18.0732	7.3976	181.741
94075	34.78	0.73883	8.976		18.1462	7.40311	181.7
94275	35.16	0.73959	8.977		18.3445	7.41072	181.721
94475	35.36	0.74052	8.979		18.4488	7.42004	181.761
94675	35.16	0.74199	8.983		18.3445	7.43477	181.842
94875	35.16	0.74199	8.983		18.3445	7.43477	181.842
95075	35.12	0.74371	8.98		18.3236	7.452	181.781
95275	35.54	0.74436	8.98		18.5427	7.45852	181.781
95475	35.58	0.74585	8.978		18.5636	7.47345	181.741
95675	35.1	0.74712	8.979		18.3132	7.48617	181.761
95875	34.92	0.74788	8.977		18.2192	7.49379	181.721
96075	35.32	0.74864	8.977		18.4279	7.5014	181.721
96275	35.68	0.74961	8.979		18.6158	7.51112	181.761
96475	35.24	0.75077	8.98		18.3862	7.52275	181.781
96675	35.78	0.75138	8.981		18.6679	7.52886	181.802
96875	35.92	0.75263	8.978		18.741	7.54138	181.741
97075	35.38	0.75382	8.977		18.4592	7.55331	181.721
97275	35.48	0.75448	8.979		18.5114	7.55992	181.761
97475	36.14	0.75525	8.979		18.8558	7.56764	181.761
97675	35.8	0.75667	8.981		18.6784	7.58186	181.802
97875	35.72	0.7575	8.98		18.6366	7.59018	181.781
98075	36	0.7583	8.979		18.7827	7.5982	181.761
98275	36.34	0.75928	8.982		18.9601	7.60802	181.822
98475	35.84	0.76066	8.979		18.6993	7.62184	181.761
98675	36.04	0.76129	8.977		18.8036	7.62816	181.721
98875	36.54	0.76221	8.981		19.0645	7.63737	181.802
99075	36.44	0.76355	8.979		19.0123	7.6508	181.761
99275	36.04	0.76469	8.981		18.8036	7.66222	181.802
99475	36.14	0.76535	8.983		18.8558	7.66884	181.842
99675	36.78	0.76613	8.98		19.1897	7.67665	181.781
99875	36.3	0.76749	8.978		18.9393	7.69028	181.741
100075	36.14	0.76825	8.979		18.8558	7.6979	181.761
100275	36.78	0.76893	8.978		19.1897	7.70471	181.741
100475	36.68	0.77046	8.978		19.1375	7.72004	181.741
100675	36	0.7717	8.978		18.7827	7.73246	181.741
100875	36.34	0.77218	8.981		18.9601	7.73727	181.802
101075	36.72	0.77315	8.98		19.1584	7.74699	181.781
101275	37	0.77405	8.977		19.3045	7.75601	181.721
101475	37.02	0.77524	8.982		19.3149	7.76794	181.822
101675	36.66	0.77637	8.98		19.1271	7.77926	181.781
101875	36.26	0.77731	8.978		18.9184	7.78868	181.741
102075	37.28	0.77785	8.979		19.4506	7.79409	181.761
102275	37.32	0.77914	8.981		19.4714	7.80701	181.802
102475	36.84	0.78051	8.98		19.221	7.82074	181.781
102675	36.68	0.78126	8.979		19.1375	7.82826	181.761
102875	36.92	0.78198	8.979		19.2627	7.83547	181.761
103075	37.2	0.78288	8.98		19.4088	7.84449	181.781
103275	37.56	0.78375	8.98		19.5966	7.85321	181.781
103475	37.72	0.7847	8.978		19.6801	7.86273	181.741
103675	37.66	0.78592	8.979		19.6488	7.87495	181.761
103875	37.32	0.78724	8.977		19.4714	7.88818	181.721
104075	37.24	0.78817	8.98		19.4297	7.89749	181.781
104275	37.12	0.78901	8.979		19.3671	7.90591	181.761
104475	37.44	0.7898	8.981		19.534	7.91383	181.802
104675	37.6	0.79064	8.978		19.6175	7.92224	181.741
104875	38	0.7917	8.979		19.8262	7.93287	181.761
105075	37.76	0.79298	8.98		19.701	7.94569	181.781
105275	37.64	0.79383	8.979		19.6384	7.95421	181.761
105475	37.58	0.79475	8.978		19.6071	7.96343	181.741
105675	37.64	0.79583	8.981		19.6384	7.97425	181.802
105875	38.12	0.79646	8.98		19.8888	7.98056	181.781
106075	38.34	0.79758	8.98		20.0036	7.99178	181.781
106275	37.8	0.79887	8.977		19.7219	8.00471	181.721
106475	38.18	0.79934	8.979		19.9201	8.00942	181.761
106675	38.36	0.80047	8.981		20.014	8.02074	181.802
106875	38.4	0.80166	8.981		20.0349	8.03267	181.802
107075	37.96	0.80291	8.98		19.8053	8.04519	181.781
107275	38.24	0.80352	8.979		19.9514	8.0513	181.761
107475	38.66	0.80437	8.979		20.1706	8.05982	181.761
107675	38.58	0.8058	8.979		20.1288	8.07415	181.761
107875	38.22	0.80672	8.98		19.941	8.08337	181.781
108075	38.62	0.80738	8.981		20.1497	8.08998	181.802
108275	38.88	0.80809	8.983		20.2853	8.09709	181.842
108475	38.78	0.80973	8.979		20.2332	8.11353	181.761
108675	38.72	0.81055	8.978		20.2019	8.12174	181.741
108875	38.8	0.81142	8.978		20.2436	8.13046	181.741
109075	38.98	0.81246	8.982		20.3375	8.14088	181.822
109275	38.82	0.81351	8.978		20.254	8.1514	181.741
109475	39.26	0.81436	8.978		20.4836	8.15992	181.741
109675	39.04	0.81544	8.979		20.3688	8.17074	181.761
109875	39.36	0.81622	8.977		20.5358	8.17856	181.721
110075	39.24	0.81737	8.982		20.4732	8.19008	181.822
110275	38.76	0.81843	8.98		20.2227	8.2007	181.781
110475	39.46	0.81909	8.982		20.588	8.20731	181.822
110675	39.36	0.82042	8.979		20.5358	8.22064	181.761
110875	39.06	0.82143	8.976		20.3793	8.23076	181.7
111075	39.3	0.82214	8.981		20.5045	8.23788	181.802
111275	39.52	0.82317	8.981		20.6193	8.2482	181.802
111475	39.34	0.82413	8.983		20.5254	8.25782	181.842
111675	39.76	0.82498	8.979		20.7445	8.26633	181.761
111875	39.86	0.82615	8.981		20.7967	8.27806	181.802
112075	39.62	0.82733	8.981		20.6714	8.28988	181.802
112275	39.74	0.82799	8.981		20.734	8.29649	181.802
112475	39.96	0.82911	8.978		20.8488	8.30772	181.741
112675	39.9	0.83003	8.98		20.8175	8.31693	181.781
112875	40.18	0.83084	8.979		20.9636	8.32505	181.761
113075	39.9	0.83223	8.983		20.8175	8.33898	181.842
113275	39.82	0.83286	8.978		20.7758	8.34529	181.741
113475	40.08	0.83407	8.977		20.9114	8.35741	181.721
113675	40	0.835	8.979		20.8697	8.36673	181.761
113875	40.46	0.83574	8.979		21.1097	8.37415	181.761
114075	40.26	0.83701	8.981		21.0054	8.38687	181.802
114275	40.04	0.83789	8.978		20.8906	8.39569	181.741
114475	40.26	0.83871	8.979		21.0054	8.40391	181.761
114675	40.54	0.83991	8.98		21.1514	8.41593	181.781
114875	40.12	0.84106	8.979		20.9323	8.42745	181.761
115075	40.68	0.84166	8.98		21.2245	8.43347	181.781
115275	40.7	0.84276	8.977		21.2349	8.44449	181.721
115475	40.52	0.84392	8.978		21.141	8.45611	181.741
115675	40.56	0.8446	8.978		21.1619	8.46293	181.741
115875	40.86	0.8457	8.979		21.3184	8.47395	181.761
116075	40.6	0.84689	8.979		21.1827	8.48587	181.761
116275	40.5	0.84782	8.977		21.1306	8.49519	181.721
116475	40.92	0.84878	8.98		21.3497	8.50481	181.781
116675	41	0.84965	8.979		21.3914	8.51353	181.761
116875	40.86	0.8508	8.979		21.3184	8.52505	181.761
117075	40.92	0.85158	8.98		21.3497	8.53287	181.781
117275	41	0.85275	8.977		21.3914	8.54459	181.721
117475	40.86	0.8538	8.978		21.3184	8.55511	181.741
117675	41.22	0.85447	8.978		21.5062	8.56182	181.741
117875	41.14	0.8557	8.982		21.4645	8.57415	181.822
118075	40.88	0.85659	8.979		21.3288	8.58307	181.761
118275	41.4	0.85731	8.978		21.6001	8.59028	181.741
118475	41.56	0.85855	8.979		21.6836	8.60271	181.761
118675	41.36	0.85972	8.979		21.5793	8.61443	181.761
118875	41.18	0.86069	8.979		21.4854	8.62415	181.761
119075	40.98	0.86156	8.98		21.381	8.63287	181.781
119275	41.5	0.86217	8.977		21.6523	8.63898	181.721
119475	41.76	0.86318	8.98		21.788	8.6491	181.781
119675	41.78	0.86438	8.979		21.7984	8.66112	181.761
119875	41.4	0.86551	8.98		21.6001	8.67244	181.781
120075	41.12	0.86661	8.98		21.4541	8.68347	181.781
120275	41.38	0.86742	8.978		21.5897	8.69158	181.741
120475	41.74	0.86819	8.98		21.7775	8.6993	181.781
120675	41.98	0.86931	8.981		21.9028	8.71052	181.802
120875	41.58	0.87045	8.979		21.6941	8.72194	181.761
121075	41.64	0.87133	8.977		21.7254	8.73076	181.721
121275	42.26	0.87201	8.978		22.0488	8.73758	181.741
121475	42.1	0.87327	8.978		21.9654	8.7502	181.741
121675	41.82	0.87456	8.978		21.8193	8.76313	181.741
121875	41.82	0.87456	8.978		21.8193	8.76313	181.741
122075	42.24	0.87602	8.981		22.0384	8.77776	181.802
122275	42.3	0.87709	8.979		22.0697	8.78848	181.761
122475	42.1	0.87806	8.981		21.9654	8.7982	181.802
122675	42.36	0.87887	8.978		22.101	8.80631	181.741
122875	42.5	0.88012	8.98		22.1741	8.81884	181.781
123075	42.36	0.88137	8.982		22.101	8.83136	181.822
123275	41.86	0.88245	8.978		21.8401	8.84218	181.741
123475	41.78	0.88338	8.978		21.7984	8.8515	181.741
123675	42.42	0.88385	8.979		22.1323	8.85621	181.761
123875	42.58	0.8848	8.978		22.2158	8.86573	181.741
124075	42.82	0.88571	8.979		22.341	8.87485	181.761
124275	42.86	0.887	8.982		22.3619	8.88778	181.822
124475	42.7	0.88816	8.977		22.2784	8.8994	181.721
124675	42.3	0.88899	8.98		22.0697	8.90772	181.781
124875	42.7	0.88986	8.981		22.2784	8.91643	181.802
125075	42.98	0.89056	8.981		22.4245	8.92345	181.802
125275	43.02	0.89194	8.981		22.4454	8.93727	181.802
125475	42.88	0.89319	8.981		22.3723	8.9498	181.802
125675	42.44	0.89435	8.978		22.1428	8.96142	181.741
125875	42.26	0.89521	8.979		22.0488	8.97004	181.761
126075	42.28	0.8961	8.979		22.0593	8.97896	181.761
126275	42.64	0.89678	8.978		22.2471	8.98577	181.741
126475	43	0.89755	8.979		22.4349	8.99349	181.761
126675	43.24	0.89857	8.981		22.5601	9.00371	181.802
126875	43.42	0.8998	8.979		22.6541	9.01603	181.761
127075	43.24	0.90067	8.978		22.5601	9.02475	181.741
127275	43.48	0.90188	8.981		22.6854	9.03687	181.802
127475	43.12	0.90291	8.977		22.4975	9.04719	181.721
127675	43.26	0.90356	8.979		22.5706	9.05371	181.761
127875	43.76	0.90428	8.98		22.8315	9.06092	181.781
128075	43.88	0.90534	8.979		22.8941	9.07154	181.761
128275	43.6	0.90684	8.977		22.748	9.08657	181.721
128475	43.24	0.90767	8.978		22.5601	9.09489	181.741
128675	43.52	0.90847	8.979		22.7062	9.10291	181.761
128875	43.92	0.90923	8.976		22.9149	9.11052	181.7
129075	43.92	0.91083	8.979		22.9149	9.12655	181.761
129275	43.62	0.91173	8.977		22.7584	9.13557	181.721
129475	43.46	0.91259	8.978		22.6749	9.14419	181.741
129675	44.16	0.91334	8.983		23.0401	9.1517	181.842
129875	43.92	0.91463	8.979		22.9149	9.16463	181.761
130075	44.24	0.91522	8.978		23.0819	9.17054	181.741
130275	44.02	0.91679	8.984		22.9671	9.18627	181.862
130475	43.9	0.91743	8.977		22.9045	9.19269	181.721
130675	44.34	0.91808	8.981		23.1341	9.1992	181.802
130875	44.52	0.91932	8.981		23.228	9.21162	181.802
131075	44.26	0.92031	8.98		23.0923	9.22154	181.781
131275	44.7	0.92145	8.979		23.3219	9.23297	181.761
131475	44.08	0.92267	8.98		22.9984	9.24519	181.781
131675	44.24	0.92322	8.979		23.0819	9.2507	181.761
131875	44.82	0.92411	8.98		23.3845	9.25962	181.781
132075	44.44	0.92555	8.977		23.1862	9.27405	181.721
132275	44.42	0.92625	8.979		23.1758	9.28106	181.761
132475	44.82	0.92721	8.979		23.3845	9.29068	181.761
132675	44.64	0.92808	8.981		23.2906	9.2994	181.802
132875	44.7	0.92955	8.978		23.3219	9.31413	181.741
133075	44.32	0.93029	8.981		23.1236	9.32154	181.802
133275	44.32	0.93029	8.981		23.1236	9.32154	181.802
133475	44.6	0.93249	8.978		23.2697	9.34359	181.741
133675	44.36	0.93337	8.981		23.1445	9.3524	181.802
133875	44.8	0.93402	8.979		23.3741	9.35892	181.761
134075	45.32	0.93524	8.981		23.6454	9.37114	181.802
134275	44.82	0.93621	8.977		23.3845	9.38086	181.721
134475	44.98	0.93696	8.977		23.468	9.38838	181.721
134675	45.48	0.93788	8.978		23.7288	9.3976	181.741
134875	45.02	0.93914	8.978		23.4888	9.41022	181.741
135075	45.02	0.93914	8.978		23.4888	9.41022	181.741
135275	45.02	0.94114	8.977		23.4888	9.43026	181.721
135475	45.28	0.94175	8.981		23.6245	9.43637	181.802
135675	45.64	0.94293	8.979		23.8123	9.4482	181.761
135875	45.2	0.94428	8.978		23.5828	9.46172	181.741
136075	45.46	0.94479	8.98		23.7184	9.46683	181.781
136275	45.74	0.94609	8.978		23.8645	9.47986	181.741
136475	45.32	0.94704	8.977		23.6454	9.48938	181.721
136675	45.76	0.94758	8.978		23.8749	9.49479	181.741
136875	45.9	0.94903	8.979		23.948	9.50932	181.761
137075	45.76	0.94968	8.979		23.8749	9.51583	181.761
137275	45.62	0.95113	8.981		23.8019	9.53036	181.802
137475	45.88	0.95164	8.981		23.9375	9.53547	181.802
137675	45.92	0.95303	8.981		23.9584	9.5494	181.802
137875	45.92	0.95373	8.978		23.9584	9.55641	181.741
138075	45.9	0.95483	8.979		23.948	9.56743	181.761
138275	46.2	0.95583	8.978		24.1045	9.57745	181.741
138475	46.24	0.95652	8.981		24.1254	9.58437	181.802
138675	46.02	0.95789	8.981		24.0106	9.5981	181.802
138875	46.32	0.95849	8.977		24.1671	9.60411	181.721
139075	46.52	0.95962	8.98		24.2715	9.61543	181.781
139275	46.02	0.96059	8.979		24.0106	9.62515	181.761
139475	46.5	0.96143	8.981		24.261	9.63357	181.802
139675	45.92	0.96303	8.977		23.9584	9.6496	181.721
139875	46.1	0.96387	8.977		24.0523	9.65802	181.721
140075	46.4	0.96436	8.98		24.2089	9.66293	181.781
140275	46.62	0.96578	8.98		24.3236	9.67715	181.781
140475	46.52	0.96642	8.978		24.2715	9.68357	181.741
140675	46.68	0.96776	8.979		24.3549	9.69699	181.761
140875	46.78	0.96823	8.98		24.4071	9.7017	181.781
141075	46.42	0.96965	8.982		24.2193	9.71593	181.822
141275	46.86	0.9703	8.98		24.4489	9.72244	181.781
141475	46.72	0.97175	8.977		24.3758	9.73697	181.721
141675	47.06	0.97223	8.981		24.5532	9.74178	181.802
141875	46.98	0.97356	8.98		24.5115	9.75511	181.781
142075	47.24	0.97407	8.979		24.6471	9.76022	181.761
142275	46.78	0.97543	8.979		24.4071	9.77385	181.761
142475	47.28	0.97615	8.979		24.668	9.78106	181.761
142675	47.08	0.97722	8.979		24.5636	9.79178	181.761
142875	47.34	0.97843	8.979		24.6993	9.80391	181.761
143075	46.98	0.97936	8.98		24.5115	9.81323	181.781
143275	47.46	0.97999	8.98		24.7619	9.81954	181.781
143475	47.16	0.98119	8.977		24.6054	9.83156	181.721
143675	47.6	0.98194	8.98		24.8349	9.83908	181.781
143875	47.3	0.98334	8.978		24.6784	9.85311	181.741
144075	47.62	0.98393	8.977		24.8454	9.85902	181.721
144275	47.26	0.98536	8.981		24.6576	9.87335	181.802
144475	47.24	0.98607	8.98		24.6471	9.88046	181.781
144675	47.68	0.98721	8.981		24.8767	9.89188	181.802
144875	47.38	0.98812	8.978		24.7202	9.901	181.741
145075	47.38	0.98812	8.978		24.7202	9.901	181.741
145275	47.36	0.99042	8.977		24.7097	9.92405	181.721
145475	47.94	0.99092	8.979		25.0123	9.92906	181.761
145675	47.68	0.99231	8.979		24.8767	9.94299	181.761
145875	47.92	0.99283	8.978		25.0019	9.9482	181.741
146075	48.16	0.99404	8.981		25.1271	9.96032	181.802
146275	47.72	0.995	8.978		24.8976	9.96994	181.741
146475	47.72	0.995	8.978		24.8976	9.96994	181.741
146675	47.7	0.99711	8.98		24.8871	9.99108	181.781
146875	48.08	0.99777	8.978		25.0854	9.9977	181.741
147075	48.32	0.99909	8.98		25.2106	10.0109	181.781
147275	47.94	0.99992	8.98		25.0123	10.0192	181.781
147475	48.48	1.00083	8.981		25.2941	10.0284	181.802
147675	48.6	1.00179	8.979		25.3567	10.038	181.761
147875	48.14	1.00295	8.979		25.1167	10.0496	181.761
148075	48.6	1.00349	8.981		25.3567	10.055	181.802
148275	48.5	1.00482	8.976		25.3045	10.0683	181.7
148475	48.76	1.00583	8.981		25.4402	10.0785	181.802
148675	48.52	1.00682	8.979		25.3149	10.0884	181.761
148875	48.74	1.00794	8.98		25.4297	10.0996	181.781
149075	48.74	1.00794	8.98		25.4297	10.0996	181.781
149275	48.92	1.00968	8.979		25.5236	10.117	181.761
149475	48.6	1.01069	8.979		25.3567	10.1272	181.761
149675	49	1.01175	8.979		25.5654	10.1378	181.761
149875	49	1.01265	8.981		25.5654	10.1468	181.802
150075	48.96	1.01366	8.981		25.5445	10.1569	181.802
150275	48.88	1.01459	8.976		25.5028	10.1662	181.7
150475	48.66	1.01577	8.979		25.388	10.1781	181.761
150675	48.66	1.01577	8.979		25.388	10.1781	181.761
150875	48.76	1.01773	8.976		25.4402	10.1977	181.7
151075	49.42	1.0186	8.981		25.7845	10.2064	181.802
151275	49.3	1.01945	8.978		25.7219	10.2149	181.741
151475	49.18	1.02069	8.979		25.6593	10.2274	181.761
151675	49.52	1.02147	8.978		25.8367	10.2352	181.741
151875	49.08	1.02262	8.978		25.6071	10.2467	181.741
152075	49.62	1.02323	8.977		25.8889	10.2528	181.721
152275	49.24	1.02447	8.979		25.6906	10.2652	181.761
152475	49.68	1.02531	8.982		25.9202	10.2736	181.822
152675	49.4	1.02651	8.979		25.7741	10.2857	181.761
152875	49.76	1.02718	8.978		25.9619	10.2924	181.741
153075	49.8	1.02827	8.978		25.9828	10.3033	181.741
153275	49.78	1.02928	8.981		25.9723	10.3134	181.802
153475	49.36	1.03062	8.978		25.7532	10.3269	181.741
153675	49.72	1.0312	8.981		25.941	10.3327	181.802
153875	49.98	1.03231	8.979		26.0767	10.3438	181.761
154075	49.48	1.03348	8.982		25.8158	10.3555	181.822
154275	50.14	1.03405	8.979		26.1602	10.3612	181.761
154475	49.74	1.03539	8.979		25.9515	10.3746	181.761
154675	50.12	1.03646	8.981		26.1497	10.3854	181.802
154875	49.72	1.0372	8.981		25.941	10.3928	181.802
155075	50.28	1.0381	8.981		26.2332	10.4018	181.802
155275	49.98	1.03911	8.98		26.0767	10.4119	181.781
155475	50	1.0402	8.982		26.0871	10.4228	181.822
155675	50.42	1.04115	8.983		26.3063	10.4324	181.842
155875	50.28	1.042	8.979		26.2332	10.4409	181.761
156075	50.08	1.04327	8.978		26.1289	10.4536	181.741
156275	50.16	1.04404	8.979		26.1706	10.4613	181.761
156475	50.4	1.04526	8.979		26.2958	10.4735	181.761
156675	50.54	1.04611	8.977		26.3689	10.4821	181.721
156875	50.62	1.04708	8.981		26.4106	10.4918	181.802
157075	50.32	1.04799	8.978		26.2541	10.5009	181.741
157275	50.68	1.04906	8.979		26.4419	10.5116	181.761
157475	50.52	1.04982	8.98		26.3584	10.5192	181.781
157675	50.86	1.051	8.979		26.5358	10.5311	181.761
157875	50.52	1.05212	8.978		26.3584	10.5423	181.741
158075	50.98	1.05286	8.981		26.5984	10.5497	181.802
158275	50.86	1.0538	8.975		26.5358	10.5591	181.68
158475	50.84	1.05511	8.979		26.5254	10.5722	181.761
158675	50.8	1.05572	8.98		26.5045	10.5784	181.781
158875	51.18	1.05699	8.979		26.7028	10.5911	181.761
159075	51.06	1.05783	8.978		26.6402	10.5995	181.741
159275	51.28	1.05865	8.978		26.755	10.6077	181.741
159475	50.98	1.05986	8.98		26.5984	10.6198	181.781
159675	51.2	1.06098	8.982		26.7132	10.6311	181.822
159875	51.3	1.06155	8.98		26.7654	10.6368	181.781
160075	50.94	1.06277	8.979		26.5776	10.649	181.761
160275	51.5	1.06387	8.981		26.8697	10.66	181.802
160475	51.48	1.06448	8.979		26.8593	10.6661	181.761
160675	51.1	1.06602	8.979		26.661	10.6816	181.761
160875	51.6	1.06644	8.979		26.9219	10.6858	181.761
161075	51.3	1.06775	8.976		26.7654	10.6989	181.7
161275	51.62	1.06883	8.979		26.9323	10.7097	181.761
161475	51.7	1.0696	8.979		26.9741	10.7174	181.761
161675	51.28	1.07075	8.977		26.755	10.729	181.721
161875	51.28	1.07075	8.977		26.755	10.729	181.721
162075	51.24	1.07267	8.979		26.7341	10.7482	181.761
162275	52.02	1.07329	8.981		27.141	10.7544	181.802
162475	51.92	1.07463	8.981		27.0889	10.7678	181.802
162675	52.02	1.07549	8.978		27.141	10.7765	181.741
162875	51.86	1.07645	8.981		27.0576	10.7861	181.802
163075	51.9	1.07764	8.978		27.0784	10.798	181.741
163275	52.14	1.07865	8.978		27.2037	10.8081	181.741
163475	51.88	1.07934	8.979		27.068	10.815	181.761
163675	52	1.0806	8.979		27.1306	10.8277	181.761
163875	52.32	1.08129	8.979		27.2976	10.8346	181.761
164075	52.08	1.08247	8.981		27.1723	10.8464	181.802
164275	52.54	1.08331	8.981		27.4124	10.8548	181.802
164475	52.3	1.0842	8.979		27.2871	10.8637	181.761
164675	52.16	1.08554	8.977		27.2141	10.8772	181.721
164875	52.52	1.08612	8.978		27.4019	10.883	181.741
165075	52.46	1.08744	8.983		27.3706	10.8962	181.842
165275	52.6	1.08809	8.98		27.4437	10.9027	181.781
165475	52.14	1.08935	8.981		27.2037	10.9153	181.802
165675	52.56	1.0905	8.979		27.4228	10.9269	181.761
165875	52.64	1.09118	8.977		27.4645	10.9337	181.721
166075	52.84	1.09221	8.979		27.5689	10.944	181.761
166275	52.76	1.09303	8.978		27.5271	10.9522	181.741
166475	52.3	1.0944	8.979		27.2871	10.9659	181.761
166675	52.3	1.0944	8.979		27.2871	10.9659	181.761
166875	52.4	1.09626	8.98		27.3393	10.9846	181.781
167075	53.12	1.09711	8.98		27.715	10.9931	181.781
167275	53.06	1.09813	8.978		27.6837	11.0033	181.741
167475	52.8	1.09922	8.976		27.548	11.0142	181.7
167675	53.12	1.10011	8.979		27.715	11.0231	181.761
167875	52.98	1.10136	8.978		27.6419	11.0357	181.741
168075	52.92	1.10198	8.978		27.6106	11.0419	181.741
168275	53.34	1.10303	8.98		27.8297	11.0524	181.781
168475	53.28	1.10385	8.979		27.7984	11.0606	181.761
168675	53.12	1.10491	8.978		27.715	11.0712	181.741
168875	53.16	1.10629	8.978		27.7358	11.0851	181.741
169075	53.18	1.10689	8.978		27.7463	11.0911	181.741
169275	53.72	1.108	8.981		28.028	11.1022	181.802
169475	53.36	1.10882	8.977		27.8402	11.1104	181.721
169676	53.48	1.11028	8.979		27.9028	11.1251	181.761
169876	53.82	1.11066	8.981		28.0802	11.1289	181.802
170077	53.82	1.11066	8.981		28.0802	11.1289	181.802
170277	53.84	1.11256	8.979		28.0906	11.1479	181.761
170477	53.72	1.1137	8.979		28.028	11.1593	181.761
170677	53.76	1.11498	8.98		28.0489	11.1721	181.781
170878	53.86	1.11585	8.981		28.1011	11.1809	181.802
171079	54	1.1169	8.979		28.1741	11.1914	181.761
171279	54.06	1.11758	8.981		28.2054	11.1982	181.802
171479	53.66	1.11862	8.978		27.9967	11.2086	181.741
171679	54.18	1.11994	8.977		28.268	11.2218	181.721
171880	53.82	1.12066	8.978		28.0802	11.2291	181.741
172081	54.02	1.12179	8.979		28.1845	11.2404	181.761
172281	54.3	1.1228	8.978		28.3306	11.2505	181.741
172481	54.02	1.12369	8.982		28.1845	11.2594	181.822
172681	54.3	1.125	8.979		28.3306	11.2725	181.761
172883	54.04	1.12559	8.981		28.195	11.2785	181.802
173083	54.28	1.1268	8.978		28.3202	11.2906	181.741
173283	54.68	1.12746	8.982		28.5289	11.2972	181.822
173483	54.16	1.12884	8.978		28.2576	11.311	181.741
173683	54.6	1.12939	8.98		28.4871	11.3165	181.781
173883	54.14	1.13065	8.978		28.2471	11.3292	181.741
174083	54.58	1.1317	8.979		28.4767	11.3397	181.761
174283	54.88	1.13229	8.98		28.6332	11.3456	181.781
174483	54.88	1.13229	8.98		28.6332	11.3456	181.781
174683	55	1.13425	8.981		28.6958	11.3652	181.802
174883	54.38	1.13577	8.981		28.3724	11.3805	181.802
175083	54.8	1.13622	8.982		28.5915	11.385	181.822
175283	54.74	1.13754	8.979		28.5602	11.3982	181.761
175483	55.06	1.13843	8.981		28.7271	11.4071	181.802
175683	54.88	1.13939	8.979		28.6332	11.4167	181.761
175883	54.8	1.14082	8.976		28.5915	11.4311	181.7
176083	55.14	1.1412	8.979		28.7689	11.4349	181.761
176283	54.66	1.14257	8.978		28.5184	11.4486	181.741
176483	55.24	1.14337	8.979		28.8211	11.4566	181.761
176683	55.1	1.14432	8.979		28.748	11.4661	181.761
176883	54.84	1.14561	8.977		28.6124	11.4791	181.721
177083	55.2	1.14658	8.981		28.8002	11.4888	181.802
177283	55.12	1.14711	8.979		28.7584	11.4941	181.761
177483	55	1.14865	8.98		28.6958	11.5095	181.781
177683	55.34	1.14903	8.981		28.8732	11.5133	181.802
177883	55.26	1.15056	8.981		28.8315	11.5287	181.802
178083	55.4	1.15101	8.978		28.9045	11.5332	181.741
178283	55.46	1.15219	8.979		28.9358	11.545	181.761
178483	55.24	1.15337	8.98		28.8211	11.5568	181.781
178683	55.74	1.15419	8.979		29.0819	11.565	181.761
178883	55.74	1.15519	8.979		29.0819	11.5751	181.761
179083	55.36	1.15622	8.981		28.8837	11.5854	181.802
179283	55.9	1.15714	8.981		29.1654	11.5946	181.802
179483	55.4	1.15801	8.981		28.9045	11.6033	181.802
179683	55.94	1.15922	8.979		29.1863	11.6154	181.761
179883	55.64	1.16013	8.98		29.0298	11.6245	181.781
180083	56.16	1.16114	8.978		29.3011	11.6347	181.741
180283	56.02	1.16189	8.981		29.228	11.6422	181.802
180483	55.74	1.16309	8.976		29.0819	11.6542	181.7
180683	56.06	1.16418	8.979		29.2489	11.6651	181.761
180883	56.18	1.16484	8.979		29.3115	11.6717	181.761
181083	55.8	1.16637	8.98		29.1132	11.6871	181.781
181283	56.24	1.16692	8.981		29.3428	11.6926	181.802
181483	56.24	1.16692	8.981		29.3428	11.6926	181.802
181683	56.4	1.16886	8.979		29.4263	11.712	181.761
181883	56.04	1.16999	8.981		29.2385	11.7233	181.802
182083	56.44	1.17075	8.98		29.4471	11.731	181.781
182283	56.12	1.17186	8.979		29.2802	11.7421	181.761
182483	56.28	1.1731	8.979		29.3637	11.7545	181.761
182683	56.34	1.17368	8.979		29.395	11.7603	181.761
182883	56.44	1.17505	8.979		29.4471	11.774	181.761
183083	56.7	1.17566	8.981		29.5828	11.7802	181.802
183283	56.36	1.17687	8.98		29.4054	11.7923	181.781
183483	56.94	1.17747	8.978		29.708	11.7983	181.741
183683	56.48	1.17883	8.98		29.468	11.8119	181.781
183883	56.96	1.17966	8.982		29.7185	11.8202	181.822
184083	56.96	1.17966	8.982		29.7185	11.8202	181.822
184283	57	1.18165	8.98		29.7393	11.8402	181.781
184483	56.6	1.18259	8.981		29.5306	11.8496	181.802
184683	56.88	1.18379	8.979		29.6767	11.8616	181.761
184883	57.16	1.18449	8.981		29.8228	11.8686	181.802
185083	56.84	1.18561	8.981		29.6558	11.8799	181.802
185283	57	1.18685	8.981		29.7393	11.8923	181.802
185483	57.34	1.18753	8.979		29.9167	11.8991	181.761
185683	56.86	1.1886	8.978		29.6663	11.9098	181.741
185883	57.16	1.18969	8.979		29.8228	11.9207	181.761
186083	57.08	1.19052	8.978		29.7811	11.9291	181.741
186283	56.84	1.19171	8.98		29.6558	11.941	181.781
186483	57.48	1.19248	8.978		29.9898	11.9487	181.741
186683	57.2	1.19338	8.979		29.8437	11.9577	181.761
186883	57.12	1.19471	8.982		29.8019	11.971	181.822
187083	57.36	1.19572	8.979		29.9272	11.9812	181.761
187283	57.34	1.19643	8.98		29.9167	11.9883	181.781
187483	57.38	1.19752	8.979		29.9376	11.9992	181.761
187683	57.56	1.19865	8.979		30.0315	12.0105	181.761
187883	57.38	1.19922	8.981		29.9376	12.0162	181.802
188083	57.32	1.20064	8.978		29.9063	12.0305	181.741
188283	57.78	1.20118	8.98		30.1463	12.0359	181.781
188483	57.32	1.20254	8.98		29.9063	12.0495	181.781
188683	57.8	1.20367	8.978		30.1567	12.0608	181.741
188883	57.88	1.20414	8.981		30.1985	12.0655	181.802
189083	57.6	1.20534	8.978		30.0524	12.0776	181.741
189283	58.16	1.20614	8.977		30.3445	12.0856	181.721
189483	57.78	1.20728	8.981		30.1463	12.097	181.802
189683	58	1.2085	8.979		30.2611	12.1092	181.761
189883	58.12	1.20916	8.979		30.3237	12.1158	181.761
190083	58.14	1.21015	8.982		30.3341	12.1258	181.822
190525	57.92	1.21243	8.98		30.2193	12.1486	181.781
190725	58.42	1.21345	8.981		30.4802	12.1588	181.802
190925	58.3	1.21429	8.98		30.4176	12.1672	181.781
191125	58.12	1.21526	8.977		30.3237	12.177	181.721
191325	58.56	1.2164	8.979		30.5532	12.1884	181.761
191525	58.48	1.21723	8.979		30.5115	12.1967	181.761
191725	58.32	1.21829	8.979		30.428	12.2073	181.761
191925	58.34	1.21928	8.981		30.4385	12.2172	181.802
192125	58.42	1.22025	8.979		30.4802	12.227	181.761
192325	58.62	1.22138	8.98		30.5845	12.2383	181.781
192529	58.76	1.22223	8.978		30.6576	12.2468	181.741
192729	58.76	1.22223	8.978		30.6576	12.2468	181.741
192929	58.76	1.22433	8.982		30.6576	12.2678	181.822
193130	58.76	1.22493	8.98		30.6576	12.2738	181.781
193333	58.5	1.22652	8.979		30.5219	12.2898	181.761
193533	58.74	1.22694	8.978		30.6472	12.294	181.741
193733	58.72	1.22855	8.978		30.6367	12.3101	181.741
193933	58.86	1.229	8.98		30.7098	12.3146	181.781
194133	58.86	1.2303	8.98		30.7098	12.3277	181.781
194333	59.12	1.23091	8.981		30.8454	12.3338	181.802
194533	58.88	1.23219	8.98		30.7202	12.3466	181.781
194733	59.24	1.23297	8.981		30.908	12.3544	181.802
194933	59.02	1.23404	8.979		30.7932	12.3651	181.761
195134	59.2	1.23528	8.981		30.8872	12.3776	181.802
195334	59.32	1.23614	8.978		30.9498	12.3862	181.741
195535	59.16	1.23699	8.977		30.8663	12.3947	181.721
195735	59.04	1.23824	8.981		30.8037	12.4072	181.802
195935	59.52	1.23877	8.978		31.0541	12.4125	181.741
196135	59.52	1.23877	8.978		31.0541	12.4125	181.741
196336	59.74	1.24069	8.981		31.1689	12.4318	181.802
196537	59.44	1.242	8.979		31.0124	12.4449	181.761
196737	59.34	1.24303	8.978		30.9602	12.4552	181.741
196937	59.76	1.24378	8.983		31.1793	12.4627	181.842
197137	59.28	1.24505	8.978		30.9289	12.4755	181.741
197338	59.9	1.24584	8.979		31.2524	12.4834	181.761
197539	59.44	1.2469	8.981		31.0124	12.494	181.802
197739	59.58	1.24825	8.977		31.0854	12.5075	181.721
197939	59.96	1.24871	8.978		31.2837	12.5121	181.741
198139	59.66	1.25002	8.982		31.1272	12.5253	181.822
198341	60.04	1.25069	8.981		31.3254	12.532	181.802
198541	59.86	1.25185	8.976		31.2315	12.5436	181.7
198741	59.86	1.25275	8.98		31.2315	12.5526	181.781
198941	59.76	1.25388	8.98		31.1793	12.5639	181.781
199141	60.34	1.25468	8.981		31.4819	12.5719	181.802
199341	59.84	1.25576	8.977		31.2211	12.5828	181.721
199541	60.36	1.25667	8.979		31.4924	12.5919	181.761
199741	60.04	1.25759	8.98		31.3254	12.6011	181.781
199941	60	1.2589	8.979		31.3046	12.6142	181.761
200141	60.22	1.25962	8.979		31.4193	12.6214	181.761
200341	60.38	1.26087	8.978		31.5028	12.634	181.741
200541	60.18	1.26164	8.979		31.3985	12.6417	181.761
200741	59.88	1.26294	8.979		31.2419	12.6547	181.761
200941	60.38	1.26357	8.979		31.5028	12.661	181.761
201141	60.02	1.26499	8.979		31.315	12.6753	181.761
201341	60.68	1.26536	8.979		31.6593	12.679	181.761
201541	60.24	1.26682	8.979		31.4298	12.6936	181.761
201741	60.8	1.26752	8.98		31.7219	12.7006	181.781
201941	60.76	1.26853	8.979		31.7011	12.7107	181.761
202141	60.62	1.26938	8.98		31.628	12.7192	181.781
202341	60.62	1.27048	8.981		31.628	12.7303	181.802
202541	60.6	1.27169	8.983		31.6176	12.7424	181.842
202741	61.06	1.27233	8.98		31.8576	12.7488	181.781
202941	60.94	1.27327	8.978		31.795	12.7582	181.741
203141	60.86	1.2743	8.979		31.7532	12.7685	181.761
203341	61.06	1.27563	8.978		31.8576	12.7819	181.741
203541	61.28	1.27625	8.98		31.9724	12.7881	181.781
203741	61.28	1.27725	8.977		31.9724	12.7981	181.721
203941	61.08	1.27862	8.978		31.868	12.8118	181.741
204141	61.36	1.27922	8.981		32.0141	12.8178	181.802
204341	61	1.28045	8.979		31.8263	12.8302	181.761
204541	61.32	1.28144	8.979		31.9933	12.8401	181.761
204741	61.2	1.28208	8.978		31.9306	12.8465	181.741
204941	61.22	1.28337	8.98		31.9411	12.8594	181.781
205141	61.52	1.28427	8.978		32.0976	12.8684	181.741
205341	61.56	1.28525	8.977		32.1185	12.8783	181.721
205541	61.64	1.28623	8.98		32.1602	12.8881	181.781
205741	61.58	1.28745	8.977		32.1289	12.9003	181.721
205941	61.64	1.28803	8.982		32.1602	12.9061	181.822
206141	61.5	1.28927	8.978		32.0872	12.9185	181.741
206341	61.84	1.29016	8.979		32.2646	12.9275	181.761
206541	61.6	1.29104	8.98		32.1393	12.9363	181.781
206741	61.86	1.29195	8.977		32.275	12.9454	181.721
206941	61.86	1.29195	8.977		32.275	12.9454	181.721
207141	61.88	1.29414	8.978		32.2854	12.9673	181.741
207341	61.78	1.29498	8.979		32.2333	12.9758	181.761
207541	61.52	1.29627	8.981		32.0976	12.9887	181.802
207742	62.06	1.29708	8.979		32.3793	12.9968	181.761
207946	61.84	1.29816	8.983		32.2646	13.0076	181.842
208147	62.08	1.29907	8.981		32.3898	13.0167	181.802
208347	62.18	1.30004	8.98		32.4419	13.0265	181.781
208549	62.24	1.30082	8.978		32.4733	13.0343	181.741
208749	62.04	1.30209	8.981		32.3689	13.047	181.802
208949	62.3	1.30299	8.982		32.5046	13.056	181.822
209149	62.46	1.30374	8.978		32.588	13.0635	181.741
209349	61.96	1.30511	8.977		32.3272	13.0773	181.721
209549	62.48	1.30613	8.979		32.5985	13.0875	181.761
209749	62.34	1.30688	8.977		32.5254	13.095	181.721
209949	62.34	1.30818	8.98		32.5254	13.108	181.781
210149	62.68	1.30876	8.98		32.7028	13.1138	181.781
210349	62.18	1.30994	8.981		32.4419	13.1257	181.802
210549	62.54	1.31101	8.981		32.6298	13.1364	181.802
210749	62.62	1.31168	8.98		32.6715	13.1431	181.781
210949	62.2	1.31293	8.981		32.4524	13.1556	181.802
211149	62.58	1.3141	8.979		32.6506	13.1673	181.761
211349	62.74	1.31464	8.978		32.7341	13.1727	181.741
211549	62.46	1.31584	8.979		32.588	13.1848	181.761
211749	62.54	1.31711	8.979		32.6298	13.1975	181.761
211949	62.88	1.31769	8.975		32.8072	13.2033	181.68
212149	62.58	1.3189	8.978		32.6506	13.2154	181.741
212349	63.02	1.31954	8.977		32.8802	13.2218	181.721
212549	63.02	1.31954	8.977		32.8802	13.2218	181.721
212749	63.08	1.32152	8.98		32.9115	13.2417	181.781
212949	63.08	1.32152	8.98		32.9115	13.2417	181.781
213149	63.12	1.32361	8.978		32.9324	13.2626	181.741
213506	63.04	1.32534	8.979		32.8906	13.28	181.761
213707	62.9	1.32669	8.981		32.8176	13.2935	181.802
213907	63.18	1.32749	8.981		32.9637	13.3015	181.802
214107	63.18	1.32829	8.981		32.9637	13.3095	181.802
214307	63.16	1.32949	8.98		32.9533	13.3215	181.781
214509	63.1	1.33042	8.977		32.922	13.3309	181.721
214710	63.26	1.33166	8.98		33.0054	13.3433	181.781
214911	63.06	1.33243	8.977		32.9011	13.351	181.721
215111	63.16	1.33359	8.98		32.9533	13.3626	181.781
215311	63.24	1.33437	8.981		32.995	13.3704	181.802
215511	63.48	1.33548	8.979		33.1202	13.3816	181.761
215712	63.38	1.33622	8.98		33.068	13.389	181.781
215913	63.52	1.33757	8.98		33.1411	13.4025	181.781
216113	63.38	1.33832	8.98		33.068	13.41	181.781
216313	63.8	1.33937	8.977		33.2872	13.4205	181.721
216513	63.82	1.34006	8.98		33.2976	13.4275	181.781
216714	63.38	1.34162	8.979		33.068	13.4431	181.761
216915	63.76	1.34208	8.98		33.2663	13.4477	181.781
217115	63.54	1.34326	8.981		33.1515	13.4595	181.802
217315	63.86	1.34445	8.98		33.3185	13.4714	181.781
217515	63.72	1.3452	8.98		33.2454	13.479	181.781
217717	63.86	1.34625	8.978		33.3185	13.4895	181.741
217918	64.06	1.34708	8.98		33.4228	13.4978	181.781
218119	63.56	1.34825	8.982		33.162	13.5095	181.822
218319	64.2	1.34923	8.983		33.4959	13.5193	181.842
218519	63.78	1.35018	8.979		33.2767	13.5289	181.761
218719	64.16	1.35134	8.98		33.475	13.5405	181.781
218920	63.88	1.35214	8.979		33.3289	13.5485	181.761
219121	64.3	1.35319	8.981		33.548	13.559	181.802
219321	63.74	1.35419	8.978		33.2559	13.569	181.741
219521	64.1	1.35537	8.98		33.4437	13.5809	181.781
219721	63.96	1.35601	8.98		33.3707	13.5873	181.781
219922	63.98	1.35711	8.978		33.3811	13.5983	181.741
220123	63.9	1.35854	8.982		33.3393	13.6126	181.822
220323	63.9	1.35854	8.982		33.3393	13.6126	181.822
220523	63.94	1.36022	8.977		33.3602	13.6295	181.721
220723	64.4	1.36116	8.98		33.6002	13.6389	181.781
220925	64.06	1.36198	8.981		33.4228	13.6471	181.802
221125	64.06	1.36198	8.981		33.4228	13.6471	181.802
221325	64.12	1.36396	8.979		33.4541	13.6669	181.761
221525	64.12	1.36396	8.979		33.4541	13.6669	181.761
221725	64.22	1.36602	8.982		33.5063	13.6876	181.822
221925	64.78	1.36683	8.979		33.7985	13.6957	181.761
222125	64.38	1.36807	8.977		33.5898	13.7081	181.721
222325	64.94	1.36867	8.977		33.882	13.7141	181.721
222525	64.54	1.37011	8.979		33.6733	13.7286	181.761
222725	64.48	1.37113	8.978		33.642	13.7388	181.741
222925	65.04	1.37164	8.981		33.9341	13.7439	181.802
223125	64.74	1.37284	8.982		33.7776	13.7559	181.822
223325	64.94	1.37417	8.981		33.882	13.7692	181.802
223525	65.04	1.37474	8.981		33.9341	13.7749	181.802
223725	64.82	1.37591	8.981		33.8193	13.7867	181.802
223925	65.24	1.37677	8.978		34.0385	13.7953	181.741
224125	64.86	1.3778	8.979		33.8402	13.8056	181.761
224325	65.38	1.37872	8.978		34.1115	13.8148	181.741
224525	64.94	1.37977	8.981		33.882	13.8254	181.802
224725	65.34	1.38083	8.981		34.0907	13.836	181.802
224925	65.54	1.38156	8.979		34.195	13.8433	181.761
225125	64.86	1.3828	8.982		33.8402	13.8557	181.822
225325	65.08	1.38382	8.98		33.955	13.8659	181.781
225525	65.08	1.38382	8.98		33.955	13.8659	181.781
225725	64.98	1.38576	8.981		33.9028	13.8854	181.802
225925	64.98	1.38576	8.981		33.9028	13.8854	181.802
226125	64.96	1.38776	8.979		33.8924	13.9054	181.761
226325	65.54	1.38856	8.978		34.195	13.9134	181.741
226525	65.6	1.38964	8.979		34.2263	13.9242	181.761
226725	65.88	1.39044	8.978		34.3724	13.9323	181.741
226925	65.74	1.39159	8.981		34.2994	13.9438	181.802
227125	65.48	1.39238	8.977		34.1637	13.9517	181.721
227325	65.82	1.39376	8.979		34.3411	13.9655	181.761
227525	65.98	1.39441	8.978		34.4246	13.972	181.741
227725	65.86	1.39545	8.979		34.362	13.9825	181.761
227925	65.64	1.39663	8.978		34.2472	13.9943	181.741
228125	66.08	1.39747	8.981		34.4767	14.0027	181.802
228325	65.62	1.39843	8.98		34.2367	14.0123	181.781
228525	65.94	1.39972	8.981		34.4037	14.0253	181.802
228725	66.2	1.40023	8.981		34.5394	14.0304	181.802
228925	65.86	1.40175	8.98		34.362	14.0456	181.781
229125	66.08	1.40227	8.979		34.4767	14.0508	181.761
229325	65.92	1.40333	8.979		34.3933	14.0614	181.761
229525	66.16	1.40454	8.981		34.5185	14.0735	181.802
229725	66.26	1.40511	8.98		34.5707	14.0793	181.781
229925	66.28	1.4062	8.982		34.5811	14.0902	181.822
230125	66.12	1.40746	8.98		34.4976	14.1028	181.781
230325	66.44	1.40815	8.978		34.6646	14.1097	181.741
230525	65.98	1.40931	8.982		34.4246	14.1213	181.822
230725	66.26	1.41021	8.978		34.5707	14.1304	181.741
230925	66.38	1.41157	8.978		34.6333	14.144	181.741
231125	66.22	1.41212	8.977		34.5498	14.1495	181.721
231325	66.52	1.41362	8.981		34.7063	14.1645	181.802
231525	66.54	1.41411	8.979		34.7167	14.1694	181.761
231725	66.48	1.41543	8.979		34.6854	14.1827	181.761
231925	66.82	1.41601	8.98		34.8628	14.1885	181.781
232125	66.44	1.41725	8.981		34.6646	14.2009	181.802
232325	66.6	1.41839	8.981		34.7481	14.2123	181.802
232525	66.84	1.41891	8.98		34.8733	14.2175	181.781
232725	66.72	1.42025	8.982		34.8107	14.231	181.822
232925	66.96	1.42116	8.98		34.9359	14.2401	181.781
233125	66.92	1.42188	8.98		34.915	14.2473	181.781
233325	66.64	1.42318	8.983		34.7689	14.2603	181.842
233525	67.14	1.424	8.982		35.0298	14.2685	181.822
233725	66.8	1.42502	8.979		34.8524	14.2788	181.761
233925	66.72	1.42625	8.979		34.8107	14.2911	181.761
234125	66.98	1.42696	8.978		34.9463	14.2982	181.741
234325	66.86	1.4283	8.98		34.8837	14.3116	181.781
234525	66.8	1.42902	8.978		34.8524	14.3188	181.741
234725	67.02	1.43004	8.981		34.9672	14.3291	181.802
234925	67.14	1.4312	8.981		35.0298	14.3407	181.802
235125	67.1	1.43182	8.981		35.0089	14.3469	181.802
235325	66.84	1.43311	8.981		34.8733	14.3598	181.802
235525	66.84	1.43311	8.981		34.8733	14.3598	181.802
235725	66.92	1.43498	8.98		34.915	14.3786	181.781
235925	66.92	1.43498	8.98		34.915	14.3786	181.781
236125	67.02	1.43704	8.978		34.9672	14.3992	181.741
236325	67.44	1.438	8.98		35.1863	14.4088	181.781
236525	67.64	1.43883	8.979		35.2907	14.4171	181.761
236725	67.62	1.44003	8.98		35.2802	14.4292	181.781
236925	67.16	1.44079	8.982		35.0402	14.4368	181.822
237125	67.7	1.44181	8.979		35.322	14.447	181.761
237325	67.7	1.44271	8.98		35.322	14.456	181.781
237525	67.66	1.44382	8.981		35.3011	14.4671	181.802
237725	67.78	1.44488	8.98		35.3637	14.4778	181.781
237925	67.68	1.44571	8.977		35.3115	14.4861	181.721
238125	67.48	1.44708	8.982		35.2072	14.4998	181.822
238325	67.68	1.44761	8.981		35.3115	14.5051	181.802
238525	67.56	1.44905	8.981		35.2489	14.5195	181.802
238725	67.98	1.44961	8.984		35.4681	14.5252	181.862
238925	67.74	1.45079	8.982		35.3428	14.537	181.822
239125	67.86	1.45185	8.981		35.4054	14.5476	181.802
239325	68.18	1.45274	8.979		35.5724	14.5565	181.761
239525	68.18	1.45364	8.979		35.5724	14.5655	181.761
239725	67.86	1.45465	8.981		35.4054	14.5757	181.802
239925	68.2	1.45573	8.98		35.5828	14.5865	181.781
240125	68.48	1.45643	8.98		35.7289	14.5935	181.781
240325	68.08	1.45757	8.98		35.5202	14.6049	181.781
240525	68.44	1.45865	8.982		35.7081	14.6157	181.822
240725	68.34	1.45938	8.982		35.6559	14.623	181.822
240925	68.06	1.46078	8.977		35.5098	14.6371	181.721
241125	68.6	1.46149	8.98		35.7915	14.6442	181.781
241325	68.1	1.46237	8.979		35.5307	14.653	181.761
241525	68.16	1.46354	8.981		35.562	14.6647	181.802
241725	68.74	1.46444	8.977		35.8646	14.6737	181.721
241925	68.4	1.46556	8.979		35.6872	14.685	181.761
242125	68.52	1.46652	8.978		35.7498	14.6946	181.741
242325	68.46	1.46744	8.979		35.7185	14.7038	181.761
242525	68.52	1.46872	8.977		35.7498	14.7166	181.721
242725	68.74	1.46924	8.978		35.8646	14.7218	181.741
242925	68.34	1.47058	8.979		35.6559	14.7353	181.761
243125	68.34	1.47058	8.979		35.6559	14.7353	181.761
243325	68.46	1.47264	8.981		35.7185	14.7559	181.802
243525	68.9	1.47338	8.979		35.9481	14.7633	181.761
243725	68.92	1.47428	8.977		35.9585	14.7723	181.721
243925	69.02	1.47534	8.982		36.0107	14.783	181.822
244125	68.84	1.47621	8.982		35.9168	14.7917	181.822
244325	68.94	1.47747	8.982		35.9689	14.8043	181.822
244525	69.08	1.47812	8.979		36.042	14.8108	181.761
244725	69.08	1.47922	8.98		36.042	14.8218	181.781
244925	69.06	1.48023	8.978		36.0315	14.832	181.741
245125	68.74	1.48154	8.981		35.8646	14.8451	181.802
245325	68.74	1.48154	8.981		35.8646	14.8451	181.802
245525	68.78	1.48363	8.979		35.8854	14.866	181.761
245725	69	1.48415	8.979		36.0002	14.8712	181.761
245925	69	1.48555	8.978		36.0002	14.8853	181.741
246125	69.32	1.48604	8.981		36.1672	14.8902	181.802
246325	68.92	1.48738	8.977		35.9585	14.9036	181.721
246525	69.48	1.48798	8.978		36.2507	14.9096	181.741
246725	69.54	1.48896	8.98		36.282	14.9194	181.781
246925	69.08	1.49032	8.981		36.042	14.9331	181.802
247125	69.52	1.49097	8.979		36.2715	14.9396	181.761
247325	69.26	1.49236	8.978		36.1359	14.9535	181.741
247525	69.46	1.49289	8.978		36.2402	14.9588	181.741
247725	69.12	1.49431	8.979		36.0628	14.973	181.761
247925	69.68	1.49501	8.978		36.355	14.9801	181.741
248125	69.54	1.49596	8.981		36.282	14.9896	181.802
248325	69.28	1.49715	8.977		36.1463	15.0015	181.721
248525	69.78	1.49778	8.978		36.4072	15.0078	181.741
248725	69.5	1.49907	8.978		36.2611	15.0207	181.741
248925	69.88	1.49984	8.979		36.4594	15.0285	181.761
249125	69.88	1.49984	8.979		36.4594	15.0285	181.761
249325	69.94	1.50182	8.98		36.4907	15.0483	181.781
249525	69.54	1.50306	8.978		36.282	15.0607	181.741
249725	69.76	1.50408	8.982		36.3968	15.0709	181.822
249925	69.94	1.50492	8.979		36.4907	15.0794	181.761
250125	69.94	1.50492	8.979		36.4907	15.0794	181.761
250325	69.96	1.50681	8.978		36.5011	15.0983	181.741
250525	69.72	1.508	8.976		36.3759	15.1102	181.7
250725	69.92	1.50873	8.98		36.4802	15.1175	181.781
250925	69.54	1.51016	8.981		36.282	15.1319	181.802
251125	70.1	1.51087	8.981		36.5741	15.139	181.802
251325	69.9	1.51193	8.977		36.4698	15.1496	181.721
251525	70.18	1.51304	8.976		36.6159	15.1607	181.7
251725	69.92	1.51393	8.981		36.4802	15.1696	181.802
251925	70.16	1.51494	8.979		36.6055	15.1798	181.761
252125	70.32	1.51579	8.98		36.6889	15.1883	181.781
252325	70.04	1.51679	8.98		36.5428	15.1983	181.781
252525	70.08	1.51797	8.983		36.5637	15.2101	181.842
252725	70.3	1.51869	8.978		36.6785	15.2173	181.741
252925	69.98	1.51991	8.98		36.5115	15.2296	181.781
253125	70.44	1.52075	8.978		36.7515	15.238	181.741
253325	70.44	1.52075	8.978		36.7515	15.238	181.741
253525	70.5	1.52283	8.981		36.7828	15.2588	181.802
253725	70	1.5238	8.978		36.522	15.2685	181.741
253925	70.64	1.52478	8.978		36.8559	15.2784	181.741
254125	70.14	1.52575	8.978		36.595	15.2881	181.741
254325	70.42	1.52685	8.981		36.7411	15.2991	181.802
254525	70.76	1.52753	8.98		36.9185	15.3059	181.781
254725	70.56	1.5285	8.976		36.8142	15.3156	181.7
254925	70.28	1.53	8.979		36.6681	15.3307	181.761
255125	70.6	1.53049	8.981		36.835	15.3356	181.802
255325	70.68	1.53166	8.978		36.8768	15.3473	181.741
255525	70.9	1.53249	8.983		36.9915	15.3556	181.842
255725	70.36	1.53377	8.979		36.7098	15.3684	181.761
255925	70.86	1.5346	8.978		36.9707	15.3768	181.741
256125	70.6	1.53569	8.982		36.835	15.3877	181.822
256325	70.88	1.53669	8.98		36.9811	15.3977	181.781
256525	70.76	1.53753	8.98		36.9185	15.4061	181.781
256725	70.86	1.5386	8.98		36.9707	15.4168	181.781
256925	71	1.53955	8.978		37.0437	15.4264	181.741
257125	70.86	1.5404	8.98		36.9707	15.4349	181.781
257325	70.8	1.54162	8.978		36.9394	15.4471	181.741
257525	70.98	1.54256	8.98		37.0333	15.4565	181.781
257725	70.84	1.54341	8.979		36.9602	15.465	181.761
257925	71.18	1.54459	8.98		37.1376	15.4769	181.781
258125	71.18	1.54529	8.978		37.1376	15.4839	181.741
258325	71.1	1.54632	8.976		37.0959	15.4942	181.7
258525	71.24	1.54747	8.98		37.1689	15.5057	181.781
258725	71.24	1.54847	8.979		37.1689	15.5157	181.761
258925	71.28	1.54915	8.977		37.1898	15.5225	181.721
259125	71.28	1.54915	8.977		37.1898	15.5225	181.721
259325	71.52	1.55127	8.978		37.315	15.5438	181.741
259525	70.9	1.55239	8.979		36.9915	15.555	181.761
259725	71.02	1.55364	8.981		37.0542	15.5675	181.802
259925	71.44	1.5542	8.977		37.2733	15.5731	181.721
260125	71.04	1.55554	8.981		37.0646	15.5866	181.802
260325	71.64	1.55623	8.979		37.3776	15.5935	181.761
260525	71.22	1.55727	8.979		37.1585	15.6039	181.761
260725	71.44	1.5583	8.978		37.2733	15.6142	181.741
260925	71.66	1.55952	8.981		37.3881	15.6265	181.802
261125	71.68	1.56011	8.98		37.3985	15.6324	181.781
261325	71.44	1.5615	8.982		37.2733	15.6463	181.822
261525	71.84	1.56206	8.98		37.482	15.6519	181.781
261725	71.58	1.56335	8.982		37.3463	15.6648	181.822
261925	71.86	1.56425	8.98		37.4924	15.6738	181.781
262125	71.9	1.56494	8.98		37.5133	15.6808	181.781
262325	71.68	1.56641	8.978		37.3985	15.6955	181.741
262525	71.98	1.56701	8.981		37.555	15.7015	181.802
262725	71.58	1.56835	8.978		37.3463	15.7149	181.741
262925	72	1.569	8.981		37.5655	15.7214	181.802
263125	71.6	1.57034	8.98		37.3568	15.7349	181.781
263325	71.96	1.57101	8.978		37.5446	15.7416	181.741
263525	71.76	1.57218	8.977		37.4402	15.7533	181.721
263725	72.1	1.57316	8.979		37.6176	15.7631	181.761
263925	72	1.5739	8.978		37.5655	15.7705	181.741
264125	71.84	1.57526	8.978		37.482	15.7842	181.741
264325	72.2	1.57603	8.981		37.6698	15.7919	181.802
264525	71.96	1.57701	8.978		37.5446	15.8017	181.741
264725	71.84	1.57826	8.978		37.482	15.8142	181.741
264925	72.08	1.57927	8.979		37.6072	15.8243	181.761
265125	72.4	1.57986	8.979		37.7742	15.8303	181.761
265325	72.4	1.57986	8.979		37.7742	15.8303	181.761
265525	72.48	1.58183	8.98		37.8159	15.85	181.781
265725	72	1.583	8.978		37.5655	15.8617	181.741
265925	72.48	1.58383	8.979		37.8159	15.87	181.761
266125	72.48	1.58383	8.979		37.8159	15.87	181.761
266325	72.72	1.58595	8.981		37.9411	15.8913	181.802
266525	72.72	1.58595	8.981		37.9411	15.8913	181.802
266725	72.72	1.58785	8.979		37.9411	15.9103	181.761
266925	72.36	1.58887	8.978		37.7533	15.9205	181.741
267125	72.5	1.59022	8.981		37.8263	15.9341	181.802
267325	72.48	1.59083	8.981		37.8159	15.9402	181.802
267525	72.34	1.59208	8.978		37.7429	15.9527	181.741
267725	72.84	1.59281	8.977		38.0037	15.96	181.721
267925	72.82	1.59371	8.979		37.9933	15.969	181.761
268125	72.48	1.59483	8.982		37.8159	15.9803	181.822
268325	72.92	1.59588	8.979		38.0455	15.9908	181.761
268525	72.92	1.59588	8.979		38.0455	15.9908	181.761
268725	73.06	1.59773	8.981		38.1185	16.0093	181.802
268925	72.9	1.59869	8.981		38.035	16.0189	181.802
269125	72.76	1.59993	8.977		37.962	16.0314	181.721
269325	73.08	1.60072	8.982		38.1289	16.0393	181.822
269525	72.84	1.60161	8.981		38.0037	16.0482	181.802
269725	73.1	1.60291	8.981		38.1394	16.0612	181.802
269925	72.9	1.60369	8.979		38.035	16.069	181.761
270125	72.92	1.60498	8.98		38.0455	16.082	181.781
270325	73.24	1.60557	8.979		38.2124	16.0879	181.761
270525	72.92	1.60678	8.978		38.0455	16.1	181.741
270725	73.32	1.60774	8.979		38.2542	16.1096	181.761
270925	73.12	1.60851	8.978		38.1498	16.1173	181.741
271125	72.76	1.60983	8.977		37.962	16.1306	181.721
271325	72.76	1.60983	8.977		37.962	16.1306	181.721
271525	72.74	1.61194	8.981		37.9515	16.1517	181.802
271725	72.74	1.61194	8.981		37.9515	16.1517	181.802
271925	72.82	1.61381	8.977		37.9933	16.1704	181.721
272125	73.44	1.6146	8.979		38.3168	16.1784	181.761
272325	73.1	1.61561	8.981		38.1394	16.1885	181.802
272525	73.16	1.61689	8.978		38.1707	16.2013	181.741
272725	73.54	1.61736	8.981		38.3689	16.206	181.802
272925	73.54	1.61736	8.981		38.3689	16.206	181.802
273125	73.52	1.61937	8.981		38.3585	16.2262	181.802
273325	73.34	1.62053	8.978		38.2646	16.2378	181.741
273525	73.74	1.62169	8.979		38.4733	16.2494	181.761
273725	73.38	1.62252	8.98		38.2855	16.2577	181.781
273925	73.66	1.62352	8.981		38.4316	16.2677	181.802
274125	73.4	1.62431	8.98		38.2959	16.2757	181.781
274325	73.62	1.62573	8.979		38.4107	16.2899	181.761
274525	73.4	1.62641	8.981		38.2959	16.2967	181.802
274725	73.82	1.62756	8.977		38.515	16.3082	181.721
274925	73.52	1.62847	8.977		38.3585	16.3173	181.721
275125	73.82	1.62946	8.98		38.515	16.3273	181.781
275325	73.96	1.63041	8.981		38.5881	16.3368	181.802
275525	73.7	1.6314	8.982		38.4524	16.3467	181.822
275725	73.62	1.63253	8.981		38.4107	16.358	181.802
275925	73.76	1.63318	8.979		38.4837	16.3645	181.761
276125	73.6	1.63464	8.98		38.4002	16.3792	181.781
276325	74.1	1.63506	8.981		38.6611	16.3834	181.802
276525	73.6	1.63654	8.978		38.4002	16.3982	181.741
276725	74.12	1.63726	8.979		38.6716	16.4054	181.761
276925	73.74	1.63829	8.978		38.4733	16.4157	181.741
277125	74.06	1.63958	8.982		38.6403	16.4287	181.822
277325	73.76	1.64028	8.981		38.4837	16.4357	181.802
277525	74.06	1.64138	8.978		38.6403	16.4467	181.741
277725	74.26	1.64221	8.979		38.7446	16.455	181.761
277925	74.18	1.64314	8.983		38.7029	16.4643	181.842
278125	74.1	1.64446	8.978		38.6611	16.4776	181.741
278325	74.24	1.64512	8.985		38.7342	16.4842	181.883
278525	74.16	1.64624	8.979		38.6924	16.4954	181.761
278725	74.34	1.64728	8.98		38.7863	16.5058	181.781
278925	74.42	1.64805	8.979		38.8281	16.5135	181.761
279125	74	1.6496	8.981		38.6089	16.5291	181.802
279325	74.3	1.64999	8.98		38.7655	16.533	181.781
279525	74.16	1.65144	8.981		38.6924	16.5475	181.802
279725	74.38	1.65207	8.978		38.8072	16.5538	181.741
279925	74.46	1.65334	8.978		38.8489	16.5665	181.741
280125	74.4	1.65396	8.979		38.8176	16.5727	181.761
280325	74.5	1.65532	8.981		38.8698	16.5864	181.802
280525	74.34	1.65608	8.979		38.7863	16.594	181.761
280725	74.14	1.65735	8.978		38.682	16.6067	181.741
280925	74.64	1.65798	8.979		38.9429	16.613	181.761
281125	74.4	1.65936	8.981		38.8176	16.6269	181.802
281325	74.66	1.65997	8.977		38.9533	16.633	181.721
281525	74.3	1.66129	8.975		38.7655	16.6462	181.68
281725	74.78	1.66203	8.983		39.0159	16.6536	181.842
281925	74.66	1.66307	8.978		38.9533	16.664	181.741
282125	74.6	1.66419	8.981		38.922	16.6753	181.802
282325	75.06	1.66483	8.977		39.162	16.6817	181.721
282525	75.06	1.66483	8.977		39.162	16.6817	181.721
282725	75.04	1.66714	8.979		39.1516	16.7048	181.761
282925	75.02	1.66784	8.977		39.1411	16.7118	181.721
283125	75.02	1.66784	8.977		39.1411	16.7118	181.721
283325	75.14	1.6698	8.979		39.2037	16.7315	181.761
283525	74.84	1.67101	8.98		39.0472	16.7436	181.781
283725	74.62	1.67218	8.978		38.9324	16.7553	181.741
283925	74.96	1.67306	8.98		39.1098	16.7641	181.781
284125	75.04	1.67404	8.98		39.1516	16.7739	181.781
284325	75.12	1.67461	8.979		39.1933	16.7797	181.761
284525	75.18	1.67609	8.981		39.2246	16.7945	181.802
284725	75.06	1.67673	8.978		39.162	16.8009	181.741
284925	75.14	1.6781	8.981		39.2037	16.8146	181.802
285125	75.04	1.67884	8.982		39.1516	16.822	181.822
285325	75.32	1.68014	8.979		39.2976	16.8351	181.761
285525	75.2	1.68088	8.979		39.235	16.8425	181.761
285725	75.14	1.682	8.98		39.2037	16.8537	181.781
285925	75.28	1.68265	8.979		39.2768	16.8602	181.761
286125	75.16	1.68409	8.98		39.2142	16.8746	181.781
286325	75.24	1.68477	8.979		39.2559	16.8815	181.761
286525	75.06	1.68613	8.978		39.162	16.8951	181.741
286725	75.38	1.68652	8.979		39.329	16.899	181.761
286925	75.22	1.68787	8.981		39.2455	16.9125	181.802
287125	75.6	1.68874	8.98		39.4437	16.9212	181.781
287325	75.6	1.68874	8.98		39.4437	16.9212	181.781
287525	75.66	1.69072	8.979		39.475	16.9411	181.761
287725	75.42	1.6917	8.981		39.3498	16.9509	181.802
287925	75.36	1.69272	8.979		39.3185	16.9611	181.761
288125	75.6	1.69384	8.978		39.4437	16.9723	181.741
288325	75.74	1.69449	8.978		39.5168	16.9789	181.741
288525	75.46	1.69599	8.978		39.3707	16.9939	181.741
288725	75.82	1.69646	8.981		39.5585	16.9986	181.802
288925	75.62	1.69793	8.981		39.4542	17.0133	181.802
289125	75.94	1.69842	8.98		39.6211	17.0182	181.781
289325	75.66	1.69962	8.979		39.475	17.0303	181.761
289525	75.46	1.70099	8.979		39.3707	17.044	181.761
289725	75.9	1.70164	8.981		39.6003	17.0505	181.802
289925	75.78	1.70258	8.979		39.5376	17.0599	181.761
290125	75.6	1.70394	8.981		39.4437	17.0735	181.802
290325	75.9	1.70454	8.982		39.6003	17.0796	181.822
290525	75.76	1.70578	8.983		39.5272	17.092	181.842
290725	75.8	1.70667	8.979		39.5481	17.1009	181.761
290925	75.98	1.70761	8.982		39.642	17.1103	181.822
291125	75.5	1.70878	8.977		39.3916	17.122	181.721
291325	75.92	1.70973	8.98		39.6107	17.1316	181.781
291525	76.14	1.71065	8.981		39.7255	17.1408	181.802
291725	75.84	1.71146	8.979		39.569	17.1489	181.761
291925	75.92	1.71263	8.981		39.6107	17.1606	181.802
292125	76.12	1.71356	8.98		39.715	17.1699	181.781
292325	75.9	1.71453	8.978		39.6003	17.1797	181.741
292525	76.26	1.71571	8.98		39.7881	17.1915	181.781
292725	75.9	1.71644	8.98		39.6003	17.1988	181.781
292925	76.14	1.71775	8.98		39.7255	17.2119	181.781
293125	76.38	1.71837	8.982		39.8507	17.2181	181.822
293325	76.38	1.71837	8.982		39.8507	17.2181	181.822
293525	76.46	1.72034	8.98		39.8924	17.2379	181.781
293725	76.46	1.72034	8.98		39.8924	17.2379	181.781
293925	76.44	1.72225	8.978		39.882	17.257	181.741
294125	76	1.7237	8.981		39.6524	17.2715	181.802
294325	76	1.7237	8.981		39.6524	17.2715	181.802
294525	76.02	1.72559	8.98		39.6629	17.2905	181.781
294725	76.02	1.72559	8.98		39.6629	17.2905	181.781
294925	75.82	1.72756	8.979		39.5585	17.3102	181.761
295125	76.46	1.72834	8.982		39.8924	17.318	181.822
295325	76.14	1.72935	8.979		39.7255	17.3282	181.761
295525	76.14	1.72935	8.979		39.7255	17.3282	181.761
295725	75.88	1.73154	8.976		39.5898	17.3501	181.7
295925	76.64	1.73228	8.981		39.9863	17.3575	181.802
296125	76.26	1.73351	8.979		39.7881	17.3698	181.761
296325	76.78	1.73433	8.982		40.0594	17.3781	181.822
296525	76.3	1.73529	8.98		39.809	17.3877	181.781
296725	76.74	1.73644	8.979		40.0385	17.3992	181.761
296925	76.6	1.73719	8.98		39.9655	17.4067	181.781
297125	76.7	1.73846	8.98		40.0177	17.4194	181.781
297325	76.66	1.73907	8.979		39.9968	17.4256	181.761
297525	76.78	1.74043	8.978		40.0594	17.4392	181.741
297725	76.98	1.74116	8.98		40.1637	17.4465	181.781
297925	76.44	1.74235	8.978		39.882	17.4584	181.741
298125	76.88	1.74319	8.979		40.1116	17.4668	181.761
298325	76.84	1.74411	8.977		40.0907	17.4761	181.721
298525	76.62	1.74558	8.978		39.9759	17.4908	181.741
298725	76.4	1.74626	8.981		39.8611	17.4976	181.802
298925	77.1	1.74731	8.979		40.2263	17.5081	181.761
299125	77	1.74815	8.979		40.1742	17.5165	181.761
299325	77.14	1.7493	8.98		40.2472	17.5281	181.781
299525	76.6	1.75029	8.98		39.9655	17.538	181.781
299725	77.08	1.75112	8.984		40.2159	17.5463	181.862
299925	76.98	1.75206	8.979		40.1637	17.5557	181.761
300125	77.04	1.75324	8.978		40.195	17.5675	181.741
300325	77.14	1.7539	8.979		40.2472	17.5741	181.761
300525	76.72	1.75535	8.978		40.0281	17.5887	181.741
300725	77.16	1.75579	8.978		40.2577	17.5931	181.741
300925	76.94	1.75717	8.98		40.1429	17.6069	181.781
301125	77.36	1.75802	8.98		40.362	17.6154	181.781
301325	76.96	1.75906	8.979		40.1533	17.6259	181.761
301525	76.92	1.76028	8.98		40.1324	17.6381	181.781
301725	77.4	1.76091	8.979		40.3829	17.6444	181.761
301925	77.44	1.762	8.979		40.4037	17.6553	181.761
302125	77.6	1.76304	8.979		40.4872	17.6657	181.761
302325	77.54	1.76376	8.978		40.4559	17.6729	181.741
302525	77.12	1.76531	8.978		40.2368	17.6885	181.741
302725	77.7	1.76601	8.979		40.5394	17.6955	181.761
302925	77.44	1.7668	8.978		40.4037	17.7034	181.741
303125	77.44	1.7679	8.979		40.4037	17.7144	181.761
303325	77.38	1.76922	8.977		40.3724	17.7277	181.721
303525	77.66	1.76972	8.979		40.5185	17.7327	181.761
303725	77.58	1.77125	8.977		40.4768	17.748	181.721
303925	77.76	1.77178	8.984		40.5707	17.7533	181.862
304125	77.52	1.77287	8.979		40.4455	17.7642	181.761
304325	77.68	1.77401	8.98		40.529	17.7757	181.781
304525	77.62	1.77473	8.977		40.4977	17.7829	181.721
304725	77.56	1.77605	8.978		40.4663	17.7961	181.741
304925	77.78	1.77708	8.981		40.5811	17.8064	181.802
305125	77.44	1.7778	8.98		40.4037	17.8136	181.781
305325	77.6	1.77894	8.979		40.4872	17.8251	181.761
305525	77.94	1.77962	8.981		40.6646	17.8319	181.802
305725	77.94	1.77962	8.981		40.6646	17.8319	181.802
305925	77.96	1.78171	8.982		40.675	17.8528	181.822
306125	77.78	1.78288	8.978		40.5811	17.8645	181.741
306325	78	1.7838	8.981		40.6959	17.8737	181.802
306525	77.56	1.78495	8.98		40.4663	17.8853	181.781
306725	77.98	1.78601	8.979		40.6855	17.8959	181.761
306925	78.06	1.78658	8.981		40.7272	17.9016	181.802
307125	77.66	1.78782	8.978		40.5185	17.914	181.741
307325	78.02	1.78889	8.983		40.7064	17.9247	181.842
307525	78.18	1.78974	8.982		40.7898	17.9333	181.822
307725	78.1	1.79056	8.978		40.7481	17.9415	181.741
307925	78.1	1.79056	8.978		40.7481	17.9415	181.741
308125	78.18	1.79284	8.981		40.7898	17.9643	181.802
308325	78.34	1.79368	8.978		40.8733	17.9727	181.741
308525	78	1.7947	8.981		40.6959	17.983	181.802
308725	78.12	1.79586	8.981		40.7585	17.9946	181.802
308925	78.34	1.79658	8.98		40.8733	18.0018	181.781
309125	78.34	1.79658	8.98		40.8733	18.0018	181.781
309325	78.22	1.79852	8.98		40.8107	18.0212	181.781
309525	78.1	1.79987	8.98		40.7481	18.0348	181.781
309725	78.44	1.80055	8.982		40.9255	18.0416	181.822
309925	78.44	1.80055	8.982		40.9255	18.0416	181.822
310125	78.62	1.80268	8.977		41.0194	18.0629	181.721
310325	78.46	1.80334	8.983		40.9359	18.0695	181.842
310525	78.1	1.80476	8.98		40.7481	18.0838	181.781
310725	78.1	1.80476	8.98		40.7481	18.0838	181.781
310925	77.88	1.80674	8.98		40.6333	18.1036	181.781
311125	78.76	1.80743	8.979		41.0924	18.1105	181.761
311325	78.46	1.80854	8.98		40.9359	18.1216	181.781
311525	78.62	1.80948	8.978		41.0194	18.1311	181.741
311725	78.68	1.81036	8.979		41.0507	18.1399	181.761
311925	78.24	1.81162	8.979		40.8211	18.1525	181.761
312125	78.38	1.81277	8.981		40.8942	18.164	181.802
312325	78.58	1.8136	8.98		40.9985	18.1723	181.781
312525	78.34	1.81478	8.983		40.8733	18.1842	181.842
312725	78.76	1.81553	8.978		41.0924	18.1917	181.741
312925	78.76	1.81553	8.978		41.0924	18.1917	181.741
313125	78.7	1.81756	8.981		41.0611	18.212	181.802
313325	78.4	1.81856	8.979		40.9046	18.222	181.761
313525	78.82	1.81961	8.98		41.1237	18.2326	181.781
313725	78.76	1.82043	8.98		41.0924	18.2408	181.781
313925	78.66	1.82137	8.98		41.0403	18.2502	181.781
314125	78.4	1.82256	8.979		40.9046	18.2621	181.761
314325	78.4	1.82256	8.979		40.9046	18.2621	181.761
314525	78.28	1.8246	8.978		40.842	18.2826	181.741
314725	78.28	1.8246	8.978		40.842	18.2826	181.741
314925	78.38	1.82667	8.983		40.8942	18.3033	181.842
315125	78.98	1.82736	8.978		41.2072	18.3102	181.741
315325	78.94	1.82837	8.982		41.1864	18.3203	181.822
315525	78.66	1.82957	8.981		41.0403	18.3324	181.802
315725	79.18	1.83039	8.982		41.3116	18.3406	181.822
315925	78.8	1.83132	8.979		41.1133	18.3499	181.761
316125	78.82	1.83251	8.98		41.1237	18.3618	181.781
316325	79.22	1.83327	8.979		41.3324	18.3694	181.761
316525	79.22	1.83327	8.979		41.3324	18.3694	181.761
316725	79.2	1.83538	8.98		41.322	18.3906	181.781
316925	79.26	1.83626	8.98		41.3533	18.3994	181.781
317125	78.78	1.83733	8.978		41.1029	18.4101	181.741
317325	79.26	1.83836	8.981		41.3533	18.4204	181.802
317525	79.26	1.83836	8.981		41.3533	18.4204	181.802
317725	79.42	1.8402	8.981		41.4368	18.4389	181.802
317925	79.18	1.84129	8.98		41.3116	18.4498	181.781
318125	79.26	1.84236	8.983		41.3533	18.4605	181.842
318325	79.32	1.84314	8.978		41.3846	18.4683	181.741
318525	78.86	1.8445	8.981		41.1446	18.482	181.802
318725	78.86	1.8445	8.981		41.1446	18.482	181.802
318925	78.88	1.84629	8.98		41.155	18.4999	181.781
319125	79.5	1.84718	8.98		41.4785	18.5088	181.781
319325	79.48	1.84818	8.981		41.4681	18.5188	181.802
319525	79.6	1.84904	8.978		41.5307	18.5275	181.741
319725	79.6	1.84904	8.978		41.5307	18.5275	181.741
319925	79.6	1.85094	8.979		41.5307	18.5465	181.761
320125	79.16	1.85239	8.981		41.3011	18.561	181.802
320325	79.66	1.85302	8.981		41.562	18.5673	181.802
320525	79.12	1.85431	8.979		41.2803	18.5803	181.761
320725	79.56	1.85535	8.978		41.5098	18.5907	181.741
320925	79.54	1.85586	8.98		41.4994	18.5958	181.781
321125	79.26	1.85756	8.978		41.3533	18.6128	181.741
321325	79.4	1.85811	8.981		41.4264	18.6183	181.802
321525	79.6	1.85934	8.978		41.5307	18.6307	181.741
321725	79.48	1.86008	8.979		41.4681	18.6381	181.761
321925	79.4	1.86151	8.98		41.4264	18.6524	181.781
322125	79.46	1.86209	8.978		41.4577	18.6582	181.741
322325	79.42	1.8632	8.981		41.4368	18.6693	181.802
322525	79.48	1.86438	8.98		41.4681	18.6812	181.781
322725	79.64	1.86503	8.98		41.5516	18.6877	181.781
322925	79.38	1.86632	8.981		41.4159	18.7006	181.802
323125	79.68	1.86691	8.98		41.5724	18.7065	181.781
323325	79.64	1.86803	8.981		41.5516	18.7177	181.802
323525	79.64	1.86933	8.98		41.5516	18.7308	181.781
323725	79.78	1.87008	8.978		41.6246	18.7383	181.741
323925	79.28	1.87125	8.979		41.3637	18.75	181.761
324125	79.28	1.87125	8.979		41.3637	18.75	181.761
324325	79.44	1.8731	8.98		41.4472	18.7685	181.781
324525	79.98	1.87421	8.981		41.729	18.7797	181.802
324725	79.52	1.87507	8.981		41.489	18.7883	181.802
324925	79.92	1.87613	8.979		41.6977	18.7989	181.761
325125	79.96	1.87691	8.981		41.7185	18.8067	181.802
325325	79.92	1.87793	8.981		41.6977	18.8169	181.802
325525	79.76	1.87918	8.978		41.6142	18.8295	181.741
325725	79.96	1.87991	8.979		41.7185	18.8368	181.761
325925	79.76	1.88118	8.98		41.6142	18.8495	181.781
326125	80.1	1.88166	8.981		41.7916	18.8543	181.802
326325	79.7	1.88301	8.977		41.5829	18.8678	181.721
326525	80.04	1.88399	8.981		41.7603	18.8777	181.802
326725	80	1.885	8.978		41.7394	18.8878	181.741
326925	80.12	1.88586	8.978		41.802	18.8964	181.741
327125	79.94	1.88672	8.98		41.7081	18.905	181.781
327325	79.78	1.88808	8.98		41.6246	18.9186	181.781
327525	80.28	1.8888	8.979		41.8855	18.9259	181.761
327725	80.28	1.8888	8.979		41.8855	18.9259	181.761
327925	80.24	1.89102	8.978		41.8646	18.9481	181.741
328125	80.02	1.89189	8.978		41.7498	18.9568	181.741
328325	80.04	1.89289	8.976		41.7603	18.9668	181.7
328525	80.42	1.89395	8.98		41.9585	18.9775	181.781
328725	80.12	1.89466	8.978		41.802	18.9846	181.741
328925	80.26	1.89601	8.98		41.8751	18.9981	181.781
329125	80.28	1.8969	8.977		41.8855	19.007	181.721
329325	80.18	1.89774	8.981		41.8333	19.0154	181.802
329525	80.12	1.89896	8.979		41.802	19.0277	181.761
329725	80.52	1.89992	8.982		42.0107	19.0373	181.822
329925	80.02	1.90069	8.979		41.7498	19.045	181.761
330125	80.36	1.90187	8.979		41.9272	19.0568	181.761
330325	80.24	1.90282	8.978		41.8646	19.0663	181.741
330525	80.36	1.90387	8.98		41.9272	19.0769	181.781
330725	80.42	1.90515	8.979		41.9585	19.0897	181.761
330925	80.56	1.9056	8.978		42.0316	19.0942	181.741
331125	80.44	1.90685	8.979		41.969	19.1067	181.761
331325	80.44	1.90795	8.981		41.969	19.1177	181.802
331525	80.72	1.90875	8.98		42.1151	19.1258	181.781
331725	80.5	1.90963	8.976		42.0003	19.1346	181.7
331925	80.4	1.91066	8.979		41.9481	19.1449	181.761
332125	80.66	1.91167	8.979		42.0838	19.155	181.761
332325	80.66	1.91167	8.979		42.0838	19.155	181.761
332525	80.78	1.91363	8.977		42.1464	19.1746	181.721
332725	80.3	1.91479	8.979		41.8959	19.1863	181.761
332925	80.3	1.91479	8.979		41.8959	19.1863	181.761
333125	80.38	1.91687	8.98		41.9377	19.2071	181.781
333325	80.52	1.91802	8.979		42.0107	19.2186	181.761
333525	80.62	1.91868	8.98		42.0629	19.2253	181.781
333725	80.46	1.92004	8.982		41.9794	19.2389	181.822
333925	80.84	1.92041	8.979		42.1777	19.2426	181.761
334125	80.28	1.9219	8.981		41.8855	19.2575	181.802
334325	80.78	1.92263	8.979		42.1464	19.2648	181.761
334525	80.72	1.92375	8.978		42.1151	19.2761	181.741
334725	80.84	1.92471	8.98		42.1777	19.2857	181.781
334925	80.84	1.92471	8.98		42.1777	19.2857	181.781
335125	80.84	1.92651	8.979		42.1777	19.3037	181.761
335325	80.5	1.92792	8.978		42.0003	19.3178	181.741
335525	80.94	1.92867	8.98		42.2298	19.3254	181.781
335725	80.58	1.9296	8.979		42.042	19.3347	181.761
335925	80.28	1.9307	8.978		41.8855	19.3457	181.741
336125	80.86	1.9315	8.982		42.1881	19.3537	181.822
336325	80.58	1.9327	8.98		42.042	19.3657	181.781
336525	80.88	1.93379	8.977		42.1985	19.3767	181.721
336725	80.7	1.93456	8.98		42.1046	19.3844	181.781
336925	80.68	1.93586	8.979		42.0942	19.3974	181.761
337125	80.62	1.93648	8.979		42.0629	19.4036	181.761
337325	81	1.93775	8.98		42.2611	19.4163	181.781
337525	81	1.93835	8.977		42.2611	19.4223	181.721
337725	80.64	1.93968	8.98		42.0733	19.4357	181.781
337925	81.16	1.94069	8.979		42.3446	19.4458	181.761
338125	80.7	1.94166	8.977		42.1046	19.4555	181.721
338325	81.26	1.94246	8.978		42.3968	19.4635	181.741
338525	81.06	1.94333	8.982		42.2924	19.4722	181.822
338725	80.66	1.94487	8.979		42.0838	19.4877	181.761
338925	80.96	1.94536	8.978		42.2403	19.4926	181.741
339125	81.22	1.94677	8.979		42.3759	19.5067	181.761
339325	80.84	1.94741	8.979		42.1777	19.5131	181.761
339525	81.22	1.94877	8.98		42.3759	19.5268	181.781
339725	80.72	1.94965	8.98		42.1151	19.5356	181.781
339925	81.22	1.95057	8.98		42.3759	19.5448	181.781
340125	81.12	1.95131	8.977		42.3238	19.5522	181.721
340325	80.84	1.95281	8.978		42.1777	19.5672	181.741
340525	81.3	1.95334	8.979		42.4177	19.5725	181.761
340725	80.96	1.95446	8.979		42.2403	19.5838	181.761
340925	81.22	1.95567	8.979		42.3759	19.5959	181.761
341125	81	1.95645	8.981		42.2611	19.6037	181.802
341325	81.3	1.95764	8.981		42.4177	19.6156	181.802
341525	81.22	1.95837	8.98		42.3759	19.6229	181.781
341725	81.14	1.9597	8.979		42.3342	19.6363	181.761
341925	81.32	1.96024	8.982		42.4281	19.6417	181.822
342125	81.38	1.96162	8.978		42.4594	19.6555	181.741
342325	81.46	1.96219	8.977		42.5011	19.6612	181.721
342525	81.32	1.96334	8.98		42.4281	19.6727	181.781
342725	81.18	1.96439	8.979		42.3551	19.6833	181.761
342925	81.34	1.96553	8.981		42.4385	19.6947	181.802
343125	81.62	1.96633	8.978		42.5846	19.7027	181.741
343325	81.56	1.96715	8.979		42.5533	19.7109	181.761
343525	81.38	1.96832	8.979		42.4594	19.7226	181.761
343725	81.38	1.96962	8.981		42.4594	19.7357	181.802
343925	81.7	1.97021	8.979		42.6264	19.7416	181.761
344125	81.7	1.97021	8.979		42.6264	19.7416	181.761
344325	81.68	1.97211	8.977		42.6159	19.7606	181.721
344525	81.56	1.97325	8.981		42.5533	19.772	181.802
344725	81.34	1.97453	8.982		42.4385	19.7849	181.822
344925	81.5	1.97527	8.981		42.522	19.7923	181.802
345125	81.56	1.97645	8.98		42.5533	19.8041	181.781
345325	81.56	1.97745	8.982		42.5533	19.8141	181.822
345525	81.84	1.97826	8.981		42.6994	19.8222	181.802
345725	81.36	1.97932	8.981		42.449	19.8329	181.802
345925	81.54	1.98036	8.98		42.5429	19.8433	181.781
346125	81.78	1.98118	8.979		42.6681	19.8515	181.761
346325	81.62	1.98223	8.981		42.5846	19.862	181.802
346525	81.54	1.98336	8.983		42.5429	19.8733	181.842
346725	81.86	1.98415	8.979		42.7098	19.8813	181.761
346925	81.72	1.9853	8.979		42.6368	19.8928	181.761
347125	81.86	1.98635	8.983		42.7098	19.9033	181.842
347325	81.96	1.98721	8.981		42.762	19.9119	181.802
347525	81.96	1.98811	8.981		42.762	19.9209	181.802
347725	81.38	1.98922	8.981		42.4594	19.9321	181.802
347925	81.76	1.99048	8.979		42.6577	19.9447	181.761
348125	82.02	1.99109	8.979		42.7933	19.9508	181.761
348325	82.02	1.99109	8.979		42.7933	19.9508	181.761
348525	82.08	1.99317	8.981		42.8246	19.9716	181.802
348725	82.08	1.99317	8.981		42.8246	19.9716	181.802
348925	82.16	1.99494	8.979		42.8664	19.9894	181.761
349125	81.82	1.99616	8.983		42.689	20.0016	181.842
349325	82.14	1.99725	8.978		42.8559	20.0125	181.741
349525	81.54	1.99816	8.978		42.5429	20.0216	181.741
349725	81.92	1.99933	8.982		42.7411	20.0334	181.822
349925	82.04	1.99999	8.98		42.8038	20.04	181.781
350125	81.92	2.00123	8.979		42.7411	20.0524	181.761
350325	82.08	2.00217	8.978		42.8246	20.0618	181.741
350525	81.72	2.003	8.979		42.6368	20.0701	181.761
350725	81.94	2.00432	8.983		42.7516	20.0834	181.842
350925	82.22	2.00492	8.98		42.8977	20.0894	181.781
351125	82.22	2.00492	8.98		42.8977	20.0894	181.781
351325	82.34	2.00708	8.979		42.9603	20.111	181.761
351525	82.04	2.00799	8.98		42.8038	20.1201	181.781
351725	82.08	2.00927	8.979		42.8246	20.133	181.761
351925	82.42	2.00985	8.979		43.002	20.1388	181.761
352125	82.14	2.01115	8.979		42.8559	20.1518	181.761
352325	82.14	2.01205	8.979		42.8559	20.1608	181.761
352525	82.32	2.01329	8.981		42.9498	20.1732	181.802
352725	81.94	2.01402	8.981		42.7516	20.1806	181.802
352925	82.32	2.01529	8.98		42.9498	20.1933	181.781
353125	82.38	2.01587	8.979		42.9811	20.1991	181.761
353325	82.48	2.01693	8.979		43.0333	20.2097	181.761
353525	81.96	2.01811	8.982		42.762	20.2215	181.822
353725	82.46	2.01904	8.98		43.0229	20.2309	181.781
353925	82.5	2.02002	8.982		43.0438	20.2407	181.822
354125	82.5	2.02002	8.982		43.0438	20.2407	181.822
354325	82.44	2.02205	8.979		43.0125	20.261	181.761
354525	82.5	2.02292	8.981		43.0438	20.2697	181.802
354725	82.16	2.02394	8.98		42.8664	20.28	181.781
354925	82.26	2.02521	8.981		42.9185	20.2927	181.802
355125	82.4	2.02576	8.98		42.9916	20.2982	181.781
355325	82.4	2.02576	8.98		42.9916	20.2982	181.781
355525	82.44	2.02785	8.98		43.0125	20.3191	181.781
355725	82.58	2.029	8.982		43.0855	20.3307	181.822
355925	82.52	2.02972	8.978		43.0542	20.3379	181.741
356125	82.38	2.03117	8.979		42.9811	20.3524	181.761
356325	82.7	2.03155	8.981		43.1481	20.3562	181.802
356525	82.38	2.03317	8.983		42.9811	20.3724	181.842
356725	82.68	2.03376	8.979		43.1377	20.3784	181.761
356925	82.66	2.03507	8.981		43.1272	20.3915	181.802
357125	82.76	2.03573	8.981		43.1794	20.3981	181.802
357325	82.8	2.03692	8.979		43.2003	20.41	181.761
357525	82.92	2.03768	8.98		43.2629	20.4176	181.781
357725	82.92	2.03768	8.98		43.2629	20.4176	181.781
357925	82.84	2.03971	8.98		43.2211	20.438	181.781
358125	82.88	2.04079	8.979		43.242	20.4488	181.761
358325	82.48	2.04173	8.977		43.0333	20.4582	181.721
358525	82.64	2.04308	8.979		43.1168	20.4717	181.761
358725	82.48	2.04383	8.98		43.0333	20.4793	181.781
358925	82.56	2.045	8.98		43.0751	20.491	181.781
359125	82.96	2.04586	8.979		43.2838	20.4996	181.761
359325	82.36	2.04687	8.979		42.9707	20.5097	181.761
359525	82.74	2.04804	8.979		43.169	20.5214	181.761
359725	83.04	2.04864	8.978		43.3255	20.5275	181.741
359925	83.04	2.04864	8.978		43.3255	20.5275	181.741
360125	82.86	2.0508	8.979		43.2316	20.5491	181.761
360325	82.98	2.05166	8.979		43.2942	20.5577	181.761
360525	82.58	2.0529	8.98		43.0855	20.5701	181.781
360725	83.1	2.05371	8.98		43.3568	20.5783	181.781
360925	83.2	2.05448	8.979		43.409	20.586	181.761
361125	82.76	2.05573	8.981		43.1794	20.5985	181.802
361325	83.06	2.05673	8.979		43.3359	20.6085	181.761
361525	82.9	2.05779	8.98		43.2525	20.6191	181.781
361725	82.52	2.05902	8.981		43.0542	20.6315	181.802
361925	83.08	2.05962	8.977		43.3464	20.6375	181.721
362125	82.78	2.06073	8.978		43.1898	20.6486	181.741
362325	83.02	2.06194	8.978		43.3151	20.6607	181.741
362525	82.98	2.06266	8.981		43.2942	20.6679	181.802
362725	82.76	2.06393	8.981		43.1794	20.6807	181.802
362925	83.12	2.06451	8.98		43.3672	20.6865	181.781
363125	82.42	2.06595	8.98		43.002	20.7009	181.781
363325	82.88	2.06689	8.978		43.242	20.7103	181.741
363525	83.18	2.06759	8.978		43.3985	20.7173	181.741
363725	83.18	2.06759	8.978		43.3985	20.7173	181.741
363925	83.16	2.06969	8.978		43.3881	20.7384	181.741
364125	82.52	2.07082	8.977		43.0542	20.7497	181.721
364325	82.92	2.07188	8.979		43.2629	20.7603	181.761
364525	83.1	2.07252	8.978		43.3568	20.7667	181.741
364725	82.92	2.07368	8.98		43.2629	20.7784	181.781
364925	83.14	2.0747	8.979		43.3777	20.7886	181.761
365125	83.28	2.07555	8.981		43.4507	20.7971	181.802
365325	83.1	2.07652	8.979		43.3568	20.8068	181.761
365525	83.22	2.07787	8.98		43.4194	20.8203	181.781
365725	83.46	2.07849	8.98		43.5446	20.8266	181.781
365925	82.86	2.0798	8.977		43.2316	20.8397	181.721
366125	83.28	2.08065	8.979		43.4507	20.8482	181.761
366325	83.38	2.08152	8.981		43.5029	20.8569	181.802
366525	83.08	2.08262	8.981		43.3464	20.8679	181.802
366725	83.38	2.08372	8.978		43.5029	20.879	181.741
366925	83.24	2.08457	8.981		43.4298	20.8875	181.802
367125	83.32	2.08554	8.979		43.4716	20.8972	181.761
367325	83.32	2.08554	8.979		43.4716	20.8972	181.761
367525	83.34	2.08733	8.981		43.482	20.9151	181.802
367725	82.84	2.08891	8.976		43.2211	20.931	181.7
367925	83.32	2.08944	8.981		43.4716	20.9363	181.802
368125	83.24	2.09057	8.977		43.4298	20.9476	181.721
368325	83.38	2.09162	8.979		43.5029	20.9581	181.761
368525	83.34	2.09243	8.979		43.482	20.9662	181.761
368725	83.54	2.09356	8.982		43.5864	20.9776	181.822
368925	83.54	2.09356	8.982		43.5864	20.9776	181.822
369125	83.56	2.09545	8.979		43.5968	20.9965	181.761
369325	83.54	2.09636	8.978		43.5864	21.0056	181.741
369525	83.28	2.09765	8.981		43.4507	21.0185	181.802
369725	83.52	2.09837	8.981		43.5759	21.0258	181.802
369925	83.2	2.09968	8.982		43.409	21.0389	181.822
370125	83.62	2.10043	8.981		43.6281	21.0464	181.802
370325	83.62	2.10043	8.981		43.6281	21.0464	181.802
370525	83.66	2.10242	8.98		43.649	21.0663	181.781
370725	83.66	2.10242	8.98		43.649	21.0663	181.781
370925	83.66	2.10472	8.978		43.649	21.0894	181.741
371125	83.74	2.10519	8.981		43.6907	21.0941	181.802
371325	83.3	2.10645	8.979		43.4612	21.1067	181.761
371525	83.62	2.10753	8.981		43.6281	21.1175	181.802
371725	83.62	2.10833	8.978		43.6281	21.1256	181.741
371925	83.3	2.10954	8.978		43.4612	21.1377	181.741
372125	83.72	2.1104	8.979		43.6803	21.1463	181.761
372325	83.62	2.11133	8.979		43.6281	21.1556	181.761
372525	83.26	2.11256	8.98		43.4403	21.1679	181.781
372725	83.7	2.11351	8.978		43.6698	21.1775	181.741
372925	83.7	2.11351	8.978		43.6698	21.1775	181.741
373125	83.84	2.11536	8.981		43.7429	21.196	181.802
373325	83.56	2.11635	8.977		43.5968	21.2059	181.721
373525	83.38	2.11762	8.98		43.5029	21.2186	181.781
373725	83.38	2.11762	8.98		43.5029	21.2186	181.781
373925	83.2	2.11958	8.981		43.409	21.2383	181.802
374125	83.72	2.1203	8.982		43.6803	21.2455	181.822
374325	83.62	2.12133	8.979		43.6281	21.2558	181.761
374525	83.9	2.12233	8.981		43.7742	21.2658	181.802
374725	83.66	2.12352	8.981		43.649	21.2778	181.802
374925	83.9	2.12453	8.982		43.7742	21.2879	181.822
375125	83.86	2.12525	8.98		43.7533	21.2951	181.781
375325	83.62	2.12683	8.983		43.6281	21.3109	181.842
375525	83.86	2.12715	8.978		43.7533	21.3141	181.741
375725	83.62	2.12843	8.981		43.6281	21.327	181.802
375925	83.88	2.12944	8.982		43.7638	21.3371	181.822
376125	83.9	2.13033	8.979		43.7742	21.346	181.761
376325	83.9	2.13123	8.979		43.7742	21.355	181.761
376525	83.78	2.13238	8.983		43.7116	21.3665	181.842
376725	83.88	2.13354	8.978		43.7638	21.3782	181.741
376925	83.74	2.13429	8.98		43.6907	21.3857	181.781
377125	83.9	2.13533	8.98		43.7742	21.3961	181.781
377325	84.08	2.13637	8.98		43.8681	21.4065	181.781
377525	83.54	2.13736	8.976		43.5864	21.4164	181.7
377725	84.02	2.13859	8.978		43.8368	21.4288	181.741
377925	83.68	2.13931	8.979		43.6594	21.436	181.761
378125	83.9	2.14043	8.981		43.7742	21.4472	181.802
378325	83.84	2.14146	8.978		43.7429	21.4575	181.741
378525	84.04	2.14239	8.981		43.8472	21.4668	181.802
378725	83.82	2.14326	8.98		43.7325	21.4756	181.781
378925	83.8	2.14447	8.981		43.722	21.4877	181.802
379125	83.98	2.14521	8.979		43.8159	21.4951	181.761
379325	83.74	2.14619	8.978		43.6907	21.5049	181.741
379525	84.02	2.14729	8.978		43.8368	21.5159	181.741
379725	83.92	2.14833	8.979		43.7846	21.5264	181.761
379925	83.74	2.14949	8.979		43.6907	21.538	181.761
380125	84.16	2.15004	8.978		43.9098	21.5435	181.741
380325	83.7	2.1515	8.981		43.6698	21.5581	181.802
380525	84.14	2.15195	8.979		43.8994	21.5626	181.761
380725	83.86	2.15335	8.977		43.7533	21.5767	181.721
380925	83.86	2.15435	8.98		43.7533	21.5867	181.781
381125	84.12	2.15506	8.979		43.889	21.5938	181.761
381325	84.02	2.15639	8.982		43.8368	21.6071	181.822
381525	84.06	2.15738	8.98		43.8577	21.617	181.781
381725	84.32	2.15819	8.98		43.9933	21.6252	181.781
381925	84.32	2.15819	8.98		43.9933	21.6252	181.781
382125	84.24	2.16022	8.977		43.9516	21.6455	181.721
382325	84.24	2.16022	8.977		43.9516	21.6455	181.721
382525	84.3	2.1623	8.981		43.9829	21.6663	181.802
382725	84.06	2.16308	8.981		43.8577	21.6741	181.802
382925	83.92	2.16423	8.981		43.7846	21.6857	181.802
383125	83.76	2.16538	8.979		43.7012	21.6972	181.761
383325	84.22	2.16622	8.978		43.9412	21.7056	181.741
383525	83.92	2.16713	8.979		43.7846	21.7147	181.761
383725	83.94	2.16852	8.978		43.7951	21.7287	181.741
383925	84.26	2.16901	8.976		43.962	21.7336	181.7
384125	84.3	2.1702	8.979		43.9829	21.7455	181.761
384325	84	2.1712	8.981		43.8264	21.7555	181.802
384525	84.02	2.17249	8.979		43.8368	21.7684	181.761
384725	84.1	2.17297	8.979		43.8785	21.7732	181.761
384925	84.14	2.17445	8.978		43.8994	21.7881	181.741
385125	84.08	2.17507	8.979		43.8681	21.7943	181.761
385325	83.92	2.17643	8.981		43.7846	21.8079	181.802
385525	84.32	2.17709	8.979		43.9933	21.8145	181.761
385725	84.2	2.17823	8.98		43.9307	21.826	181.781
385925	84.32	2.17909	8.98		43.9933	21.8346	181.781
386125	84.22	2.18002	8.981		43.9412	21.8439	181.802
386325	84.14	2.18135	8.979		43.8994	21.8572	181.761
386525	84.44	2.18215	8.981		44.0559	21.8652	181.802
386725	84.14	2.18315	8.979		43.8994	21.8753	181.761
386925	83.98	2.18441	8.979		43.8159	21.8879	181.761
387125	84.52	2.18492	8.979		44.0977	21.893	181.761
387325	84.1	2.18607	8.981		43.8785	21.9045	181.802
387525	84.36	2.18727	8.978		44.0142	21.9165	181.741
387725	83.78	2.18818	8.982		43.7116	21.9257	181.822
387925	83.94	2.18932	8.978		43.7951	21.9371	181.741
388125	84.3	2.19029	8.979		43.9829	21.9468	181.761
388325	84.58	2.1909	8.98		44.129	21.9529	181.781
388525	84.58	2.1909	8.98		44.129	21.9529	181.781
388725	84.62	2.19298	8.98		44.1499	21.9737	181.781
388925	84.58	2.1939	8.979		44.129	21.983	181.761
389125	84.22	2.19522	8.978		43.9412	21.9962	181.741
389325	84.68	2.19596	8.977		44.1812	22.0036	181.721
389525	84.68	2.19696	8.979		44.1812	22.0136	181.761
389725	84.82	2.19801	8.978		44.2542	22.0241	181.741
389925	84.56	2.1988	8.981		44.1185	22.0321	181.802
390125	84.52	2.19992	8.98		44.0977	22.0433	181.781
390325	84.68	2.20076	8.98		44.1812	22.0517	181.781
390525	84.7	2.20226	8.978		44.1916	22.0667	181.741
390725	84.6	2.20289	8.977		44.1394	22.073	181.721
390925	84.26	2.20441	8.979		43.962	22.0883	181.761
391125	84.7	2.20505	8.978		44.1916	22.0947	181.741
391325	84.64	2.20588	8.981		44.1603	22.103	181.802
391525	84.3	2.2072	8.979		43.9829	22.1162	181.761
391725	84.3	2.2072	8.979		43.9829	22.1162	181.761
391925	84.34	2.20908	8.978		44.0038	22.1351	181.741
392125	84.94	2.20987	8.981		44.3168	22.143	181.802
392325	84.76	2.21093	8.977		44.2229	22.1536	181.721
392525	84.48	2.21213	8.981		44.0768	22.1656	181.802
392725	84.78	2.21293	8.979		44.2333	22.1736	181.761
392925	84.9	2.21388	8.98		44.2959	22.1832	181.781
393125	84.9	2.21388	8.98		44.2959	22.1832	181.781
393325	84.9	2.21579	8.981		44.2959	22.2023	181.802
393525	84.42	2.21705	8.979		44.0455	22.2149	181.761
393725	84.88	2.21779	8.979		44.2855	22.2223	181.761
393925	84.66	2.21887	8.979		44.1707	22.2332	181.761
394125	84.46	2.22014	8.978		44.0664	22.2459	181.741
394325	84.92	2.22088	8.98		44.3064	22.2533	181.781
394525	84.36	2.22207	8.98		44.0142	22.2652	181.781
394725	84.86	2.2231	8.976		44.2751	22.2756	181.7
394925	84.82	2.22371	8.98		44.2542	22.2817	181.781
395125	84.58	2.2251	8.981		44.129	22.2956	181.802
395325	84.82	2.22591	8.981		44.2542	22.3037	181.802
395525	84.98	2.22686	8.982		44.3377	22.3132	181.822
395725	84.98	2.22686	8.982		44.3377	22.3132	181.822
395925	84.86	2.2291	8.981		44.2751	22.3357	181.802
396125	84.56	2.2299	8.979		44.1185	22.3437	181.761
396325	84.72	2.23125	8.98		44.202	22.3572	181.781
396525	84.72	2.23185	8.981		44.202	22.3632	181.802
396725	84.84	2.23291	8.977		44.2646	22.3738	181.721
396925	84.82	2.23381	8.979		44.2542	22.3829	181.761
397125	85.1	2.23471	8.979		44.4003	22.3919	181.761
397325	84.58	2.2358	8.978		44.129	22.4028	181.741
397525	84.7	2.23706	8.982		44.1916	22.4154	181.822
[truncated: 1,735 more rows]

## Sheet: D-1-12B
Time: 19:38:02,07/04/2019
diameter: 49.3	mm	height: 99.7	mm
Vertical 100kN force sensor (vertical force of test piece)
Control mode: force / confining pressure	waveform: slope
KN/s	Force end point: 23.860 kN	KN	confining pressure rate: 0.500	MPa/s	confining pressure end point: 12.0050	MPa
time (ms)	vertical force (KN)	vertical deformation (mm)	confining pressure (MPa)		Stress (MPa)	axial strain	transverse strain
0	0	0	0		0	0	0
200	0	0.0002	0.003		0	0.00200602	0.0608519
401	0.02	0.00029	0.003		0.0104772	0.00290873	0.0608519
601	0.14	0.00015	0.012		0.0733406	0.00150451	0.243408
801	0.46	-0.00026	0.016		0.240976	-0.00260782	0.324544
1003	0.56	-0.0005	0.029		0.293362	-0.00501505	0.588235
1204	0.86	0.0005	0.047		0.450521	0.00501505	0.953347
1404	0.98	0.00476	0.063		0.513384	0.0477432	1.27789
1605	1.3	0.00855	0.091		0.68102	0.0857573	1.84584
1805	1.6	0.01274	0.124		0.838178	0.127783	2.51521
2005	1.64	0.01783	0.169		0.859132	0.178837	3.42799
2206	1.92	0.02413	0.222		1.00581	0.242026	4.50304
2406	2.24	0.03112	0.268		1.17345	0.312136	5.43611
2607	2.34	0.03658	0.307		1.22584	0.366901	6.22718
2807	2.54	0.04061	0.348		1.33061	0.407322	7.05882
3007	2.58	0.0455	0.382		1.35156	0.456369	7.74848
3208	2.86	0.051	0.407		1.49824	0.511535	8.25558
3408	3.14	0.0573	0.43		1.64492	0.574724	8.72211
3609	3.4	0.06411	0.459		1.78113	0.643029	9.31034
3809	3.54	0.07076	0.483		1.85447	0.709729	9.79716
4009	3.76	0.07658	0.519		1.96972	0.768104	10.5274
4211	4.02	0.08169	0.574		2.10592	0.819358	11.643
4412	4.16	0.08624	0.667		2.17926	0.864995	13.5294
4612	4.24	0.09062	0.83		2.22117	0.908927	16.8357
4813	4.58	0.0945	1.178		2.39928	0.947844	23.8945
5013	4.9	0.09759	1.82		2.56692	0.978837	36.9168
5213	4.62	0.09838	2.296		2.42024	0.98676	46.572
5414	5.02	0.09814	2.441		2.62978	0.984353	49.5132
5614	5.18	0.09979	2.791		2.7136	1.0009	56.6126
5815	5.48	0.10338	2.9		2.87076	1.03691	58.8235
6015	5.56	0.10815	2.967		2.91267	1.08475	60.1826
6215	5.84	0.11306	3.07		3.05935	1.134	62.2718
6416	6.06	0.11798	3.173		3.1746	1.18335	64.3611
6616	6.34	0.12338	3.268		3.32128	1.23751	66.288
6817	6.42	0.12865	3.371		3.36319	1.29037	68.3773
7017	6.66	0.13377	3.47		3.48892	1.34173	70.3854
7217	6.94	0.13877	3.57		3.6356	1.39188	72.4138
7419	7.08	0.14362	3.675		3.70894	1.44052	74.5436
7620	7.34	0.14843	3.772		3.84514	1.48877	76.5112
7820	7.62	0.15323	3.872		3.99182	1.53691	78.5396
8021	7.76	0.15798	3.97		4.06516	1.58455	80.5274
8221	7.84	0.16276	4.075		4.10707	1.6325	82.6572
8421	8.08	0.16777	4.173		4.2328	1.68275	84.645
8622	8.26	0.17271	4.273		4.32709	1.7323	86.6734
8822	8.5	0.17773	4.373		4.45282	1.78265	88.7018
9023	8.7	0.18286	4.474		4.55759	1.8341	90.7505
9223	8.84	0.18791	4.57		4.63093	1.88475	92.6978
9423	8.92	0.19318	4.673		4.67284	1.93761	94.787
9624	9.28	0.19845	4.777		4.86143	1.99047	96.8966
9824	9.5	0.20388	4.877		4.97668	2.04493	98.9249
10025	9.76	0.20898	4.975		5.11289	2.09609	100.913
10225	9.94	0.21402	5.072		5.20718	2.14664	102.88
10425	10.06	0.21918	5.175		5.27004	2.1984	104.97
10627	10.38	0.22407	5.274		5.43768	2.24744	106.978
10828	10.54	0.22891	5.377		5.5215	2.29599	109.067
11028	10.86	0.2332	5.476		5.68913	2.33902	111.075
11229	10.98	0.23766	5.577		5.752	2.38375	113.124
11429	11.28	0.24175	5.678		5.90915	2.42477	115.172
11629	11.44	0.2458	5.779		5.99297	2.4654	117.221
11830	11.48	0.24998	5.877		6.01393	2.50732	119.209
12030	11.68	0.25411	5.979		6.1187	2.54875	121.278
12231	11.9	0.25804	6.078		6.23395	2.58816	123.286
12431	12.02	0.26219	6.179		6.29681	2.62979	125.335
12631	12.28	0.2662	6.278		6.43302	2.67001	127.343
12832	12.5	0.27033	6.378		6.54827	2.71143	129.371
13032	12.68	0.27456	6.478		6.64256	2.75386	131.4
13233	12.86	0.2785	6.579		6.73686	2.79338	133.448
13433	13	0.28245	6.675		6.8102	2.833	135.396
13633	13.32	0.28654	6.779		6.97783	2.87402	137.505
13835	13.48	0.29058	6.88		7.06165	2.91454	139.554
14036	13.68	0.29421	6.981		7.16642	2.95095	141.602
14236	13.78	0.29798	7.082		7.21881	2.98877	143.651
14437	14.04	0.30199	7.182		7.35501	3.02899	145.68
14637	14.28	0.3056	7.282		7.48074	3.0652	147.708
14837	14.48	0.30953	7.379		7.58551	3.10461	149.675
15038	14.6	0.31349	7.481		7.64837	3.14433	151.744
15238	14.82	0.31721	7.58		7.76362	3.18164	153.753
15439	15.08	0.32102	7.685		7.89983	3.21986	155.882
15639	15.34	0.32503	7.781		8.03603	3.26008	157.83
15839	15.42	0.3291	7.88		8.07794	3.3009	159.838
16040	15.78	0.33278	7.981		8.26653	3.33781	161.886
16240	15.92	0.33653	8.086		8.33987	3.37543	164.016
16441	16.18	0.34014	8.182		8.47608	3.41163	165.963
16641	16.32	0.34379	8.281		8.54942	3.44824	167.972
16841	16.54	0.34711	8.382		8.66467	3.48154	170.02
17043	16.7	0.35076	8.481		8.74848	3.51815	172.028
17244	17	0.35405	8.586		8.90564	3.55115	174.158
17444	17.16	0.35729	8.684		8.98946	3.58365	176.146
17645	17.42	0.3605	8.783		9.12566	3.61585	178.154
17845	17.58	0.36355	8.883		9.20948	3.64644	180.183
18045	17.84	0.36646	8.984		9.34568	3.67563	182.231
18246	17.94	0.36942	9.082		9.39807	3.70532	184.219
18446	18.12	0.37236	9.181		9.49237	3.7348	186.227
18647	18.44	0.37505	9.284		9.66	3.76179	188.316
18847	18.54	0.37761	9.384		9.71239	3.78746	190.345
19047	18.74	0.37994	9.483		9.81716	3.81083	192.353
19248	18.92	0.38188	9.586		9.91145	3.83029	194.442
19448	18.98	0.38436	9.684		9.94289	3.85517	196.43
19649	19.14	0.3868	9.785		10.0267	3.87964	198.479
19849	19.4	0.38981	9.887		10.1629	3.90983	200.548
20049	19.76	0.39308	9.985		10.3515	3.94263	202.535
20250	19.88	0.39634	10.085		10.4144	3.97533	204.564
20450	20.1	0.39957	10.184		10.5296	4.00772	206.572
20651	20.32	0.40289	10.286		10.6449	4.04102	208.641
20851	20.56	0.406	10.386		10.7706	4.07222	210.669
21051	20.88	0.40919	10.485		10.9382	4.10421	212.677
21253	20.98	0.41206	10.588		10.9906	4.133	214.767
21454	21.26	0.41476	10.691		11.1373	4.16008	216.856
21654	21.46	0.41749	10.787		11.2421	4.18746	218.803
21855	21.68	0.41991	10.887		11.3573	4.21174	220.832
22055	21.76	0.42238	10.988		11.3992	4.23651	222.88
22255	21.86	0.42455	11.089		11.4516	4.25827	224.929
22456	22.14	0.42685	11.19		11.5983	4.28134	226.978
22656	22.34	0.42908	11.291		11.7031	4.30371	229.026
22857	22.54	0.43141	11.389		11.8078	4.32708	231.014
23057	22.62	0.43368	11.49		11.8497	4.34985	233.063
23257	22.82	0.43611	11.588		11.9545	4.37422	235.051
23458	23.14	0.4385	11.689		12.1221	4.39819	237.099
23658	23.22	0.44107	11.786		12.1641	4.42397	239.067
23859	23.48	0.44368	11.888		12.3003	4.45015	241.136
24059	23.76	0.44608	11.991		12.4469	4.47422	243.225
24259	23.86	0.44865	12.005		12.4993	4.5	243.509
控制模式:围压	波形:斜坡				#VALUE!	0	0
MPa/s	终点:12.0040	MPa			#VALUE!	#VALUE!	0
时间(ms)	垂直力(KN)	垂直变形(mm)	围压(MPa)		#VALUE!	#VALUE!	#VALUE!
24305	23.96	0.44921	12.004		12.5517	4.50562	243.489
控制模式:位移	波形:斜坡				#VALUE!	0	0
mm/s	终点:3.9687	mm			#VALUE!	#VALUE!	0
时间(ms)	垂直力(KN)	垂直变形(mm)	围压(MPa)		#VALUE!	#VALUE!	#VALUE!
24337	24	0.4495	12.001		12.5727	4.50853	243.428
24537	24	0.4495	12.001		12.5727	4.50853	243.428
24737	23.76	0.45028	11.979		12.4469	4.51635	242.982
24938	23.76	0.45028	11.979		12.4469	4.51635	242.982
25138	23.9	0.45303	11.982		12.5203	4.54393	243.043
25340	23.9	0.45303	11.982		12.5203	4.54393	243.043
25541	23.98	0.45601	11.98		12.5622	4.57382	243.002
25741	23.98	0.45601	11.98		12.5622	4.57382	243.002
25942	23.88	0.45814	11.978		12.5098	4.59519	242.961
26142	23.88	0.45814	11.978		12.5098	4.59519	242.961
26342	22.9	0.46019	11.982		11.9964	4.61575	243.043
26543	22.5	0.45993	11.982		11.7869	4.61314	243.043
26743	22.42	0.46225	11.977		11.745	4.63641	242.941
26943	22.42	0.46225	11.977		11.745	4.63641	242.941
27144	22.08	0.46447	11.98		11.5669	4.65868	243.002
27344	22.08	0.46447	11.98		11.5669	4.65868	243.002
27545	21.6	0.46614	11.981		11.3154	4.67543	243.022
27745	21.6	0.46614	11.981		11.3154	4.67543	243.022
27945	21.72	0.4679	11.981		11.3783	4.69308	243.022
28146	21.72	0.4679	11.981		11.3783	4.69308	243.022
28346	21.74	0.46979	11.982		11.3887	4.71204	243.043
28548	21.74	0.46979	11.982		11.3887	4.71204	243.043
28749	21.8	0.47167	11.978		11.4202	4.73089	242.961
28949	21.8	0.47167	11.978		11.4202	4.73089	242.961
29150	22	0.4736	11.978		11.5249	4.75025	242.961
29350	22	0.4736	11.978		11.5249	4.75025	242.961
29550	22.02	0.47539	11.98		11.5354	4.7682	243.002
29751	22.02	0.47539	11.98		11.5354	4.7682	243.002
29951	22.3	0.4773	11.981		11.6821	4.78736	243.022
30151	22.3	0.4773	11.981		11.6821	4.78736	243.022
30352	22.86	0.4789	11.982		11.9755	4.80341	243.043
30552	24.22	0.48102	11.981		12.6879	4.82467	243.022
30753	23.92	0.48103	11.981		12.5308	4.82477	243.022
30953	24.6	0.48189	11.98		12.887	4.8334	243.002
31153	24.92	0.48298	11.98		13.0546	4.84433	243.002
31354	24.56	0.4845	11.982		12.866	4.85958	243.043
31554	24.36	0.48547	11.977		12.7613	4.86931	242.941
31756	24.42	0.48625	11.98		12.7927	4.87713	243.002
31957	24.44	0.48725	11.98		12.8032	4.88716	243.002
32157	24.6	0.48799	11.982		12.887	4.89458	243.043
32358	24.84	0.48881	11.979		13.0127	4.90281	242.982
32558	25.24	0.48967	11.981		13.2223	4.91143	243.022
32758	25.38	0.49082	11.979		13.2956	4.92297	242.982
32959	24.78	0.49223	11.979		12.9813	4.93711	242.982
33159	24.84	0.49291	11.982		13.0127	4.94393	243.043
33360	24.94	0.49387	11.98		13.0651	4.95356	243.002
33560	25.18	0.49469	11.98		13.1908	4.96179	243.002
33760	25.34	0.49563	11.98		13.2746	4.97121	243.002
33961	25.68	0.49661	11.982		13.4528	4.98104	243.043
34161	25.74	0.49799	11.979		13.4842	4.99488	242.982
34361	25.32	0.49924	11.977		13.2642	5.00742	242.941
34562	25.38	0.49992	11.977		13.2956	5.01424	242.941
34762	25.18	0.50079	11.978		13.1908	5.02297	242.961
34964	25.54	0.50166	11.979		13.3794	5.0317	242.982
35165	25.9	0.50254	11.98		13.568	5.04052	243.002
35365	26.2	0.50343	11.98		13.7252	5.04945	243.002
35566	26.28	0.5047	11.98		13.7671	5.06219	243.002
35766	26.2	0.50573	11.981		13.7252	5.07252	243.022
35966	25.66	0.50692	11.981		13.4423	5.08445	243.022
36167	25.9	0.50764	11.98		13.568	5.09168	243.002
36367	26.36	0.50827	11.981		13.809	5.09799	243.022
36568	26.48	0.50973	11.98		13.8718	5.11264	243.002
36768	26.26	0.51071	11.983		13.7566	5.12247	243.063
36968	25.96	0.51161	11.982		13.5994	5.13149	243.043
37169	26.02	0.51259	11.982		13.6309	5.14132	243.043
37369	26.48	0.51313	11.983		13.8718	5.14674	243.063
37569	26.66	0.51427	11.983		13.9661	5.15817	243.063
37770	26.9	0.51539	11.978		14.0919	5.16941	242.961
37970	26.86	0.5166	11.979		14.0709	5.18154	242.982
38172	26.1	0.51787	11.982		13.6728	5.19428	243.043
38373	26.36	0.51847	11.982		13.809	5.2003	243.043
38573	26.74	0.51934	11.98		14.008	5.20903	243.002
38774	26.76	0.52013	11.98		14.0185	5.21695	243.002
38974	26.76	0.52013	11.98		14.0185	5.21695	243.002
39174	26.58	0.5226	11.98		13.9242	5.24173	243.002
39375	26.34	0.52338	11.981		13.7985	5.24955	243.022
39575	26.96	0.52416	11.98		14.1233	5.25737	243.002
39776	27.24	0.52507	11.982		14.27	5.2665	243.043
39976	27.46	0.52589	11.98		14.3852	5.27472	243.002
40176	27.22	0.52757	11.979		14.2595	5.29157	242.982
40377	26.78	0.52863	11.98		14.029	5.30221	243.002
40577	26.8	0.52932	11.979		14.0395	5.30913	242.982
40777	27.3	0.53005	11.982		14.3014	5.31645	243.043
40978	27.72	0.5309	11.984		14.5214	5.32497	243.083
41178	27.92	0.53213	11.98		14.6262	5.33731	243.002
41380	27.36	0.53332	11.978		14.3328	5.34925	242.961
41581	27.24	0.53407	11.982		14.27	5.35677	243.043
41781	27.74	0.53489	11.981		14.5319	5.36499	243.022
41982	27.92	0.53573	11.981		14.6262	5.37342	243.022
42182	28.14	0.53685	11.982		14.7415	5.38465	243.043
42382	27.88	0.53834	11.979		14.6053	5.3996	242.982
42583	27.62	0.53913	11.981		14.469	5.40752	243.022
42783	27.7	0.54001	11.983		14.511	5.41635	243.063
42984	28.22	0.54072	11.981		14.7834	5.42347	243.022
43184	28.44	0.54185	11.978		14.8986	5.4348	242.961
43384	28.16	0.54314	11.98		14.7519	5.44774	243.002
43585	28.16	0.54314	11.98		14.7519	5.44774	243.002
43785	28.14	0.54475	11.982		14.7415	5.46389	243.043
43985	28.56	0.5456	11.982		14.9615	5.47242	243.043
44186	28.4	0.54726	11.981		14.8777	5.48907	243.022
44386	28.16	0.54804	11.98		14.7519	5.49689	243.002
44587	28.34	0.54858	11.98		14.8462	5.50231	243.002
44787	28.84	0.54951	11.981		15.1082	5.51163	243.022
44987	28.9	0.55098	11.983		15.1396	5.52638	243.063
45188	28.46	0.55214	11.978		14.9091	5.53801	242.961
45388	28.74	0.55274	11.981		15.0558	5.54403	243.022
45590	28.92	0.55348	11.98		15.1501	5.55145	243.002
45791	29.24	0.55447	11.979		15.3177	5.56138	242.982
45991	28.9	0.55579	11.98		15.1396	5.57462	243.002
46192	28.66	0.55667	11.981		15.0139	5.58345	243.022
46392	29.3	0.55735	11.98		15.3491	5.59027	243.002
46592	29.3	0.55875	11.979		15.3491	5.60431	242.982
46793	29.08	0.55942	11.978		15.2339	5.61103	242.961
46993	29.42	0.5607	11.979		15.412	5.62387	242.982
47193	28.96	0.56166	11.98		15.171	5.6335	243.002
47394	29.36	0.56232	11.977		15.3806	5.64012	242.941
47594	29.62	0.56363	11.978		15.5168	5.65326	242.961
47795	29.1	0.56481	11.982		15.2444	5.6651	243.043
47995	29.38	0.56532	11.98		15.391	5.67021	243.002
48195	29.82	0.56616	11.98		15.6215	5.67864	243.002
48396	29.88	0.56754	11.981		15.653	5.69248	243.022
48596	29.88	0.56754	11.981		15.653	5.69248	243.022
48798	29.7	0.56911	11.981		15.5587	5.70822	243.022
48999	30.04	0.57049	11.982		15.7368	5.72207	243.043
49199	29.62	0.57143	11.98		15.5168	5.73149	243.002
49400	29.78	0.57218	11.98		15.6006	5.73902	243.002
49600	29.78	0.57218	11.98		15.6006	5.73902	243.002
49800	29.76	0.57458	11.981		15.5901	5.76309	243.022
50001	30.08	0.57507	11.981		15.7577	5.768	243.022
50201	30.58	0.5761	11.984		16.0197	5.77834	243.083
50401	29.92	0.57773	11.978		15.6739	5.79468	242.961
50602	30.16	0.57814	11.979		15.7997	5.7988	242.982
50802	30.68	0.57886	11.982		16.0721	5.80602	243.043
51003	30.34	0.58028	11.984		15.894	5.82026	243.083
51203	30.42	0.58105	11.98		15.9359	5.82798	243.002
51403	30.76	0.58183	11.979		16.114	5.83581	242.982
51604	31	0.58305	11.982		16.2397	5.84804	243.043
51804	30.54	0.58431	11.978		15.9987	5.86068	242.961
52006	30.7	0.58486	11.983		16.0825	5.8662	243.063
52207	31	0.58615	11.98		16.2397	5.87914	243.002
52407	31	0.58615	11.98		16.2397	5.87914	243.002
52608	30.9	0.58788	11.982		16.1873	5.89649	243.043
52808	30.82	0.58941	11.981		16.1454	5.91184	243.022
53008	30.66	0.59007	11.979		16.0616	5.91846	242.982
53209	31.12	0.59091	11.981		16.3026	5.92688	243.022
53409	30.84	0.59231	11.981		16.1559	5.94092	243.022
53610	31.06	0.59293	11.977		16.2711	5.94714	242.941
53810	31.38	0.59402	11.983		16.4388	5.95807	243.063
54010	30.9	0.59508	11.977		16.1873	5.96871	242.941
54211	31.28	0.59575	11.981		16.3864	5.97543	243.022
54411	31.56	0.59655	11.98		16.5331	5.98345	243.002
54611	31.58	0.59805	11.979		16.5435	5.9985	242.982
54812	31.58	0.59805	11.979		16.5435	5.9985	242.982
55012	31.78	0.59958	11.982		16.6483	6.01384	243.043
55214	31.54	0.60096	11.978		16.5226	6.02768	242.961
55415	31.46	0.60169	11.98		16.4807	6.03501	243.002
55615	31.98	0.60271	11.982		16.7531	6.04524	243.043
55816	31.62	0.60373	11.98		16.5645	6.05547	243.002
56016	32.04	0.60449	11.981		16.7845	6.06309	243.022
56216	32.22	0.60552	11.98		16.8788	6.07342	243.002
56417	31.58	0.60695	11.98		16.5435	6.08776	243.002
56617	31.82	0.60766	11.982		16.6693	6.09488	243.043
56818	32.36	0.60827	11.982		16.9522	6.101	243.043
57018	32.04	0.60999	11.981		16.7845	6.11825	243.022
57218	32.1	0.61046	11.98		16.8159	6.12297	243.002
57419	32.6	0.61109	11.982		17.0779	6.12929	243.043
57619	32.52	0.61262	11.982		17.036	6.14463	243.043
57819	32.34	0.61338	11.98		16.9417	6.15226	243.002
58020	32.68	0.61436	11.979		17.1198	6.16209	242.982
58220	32.18	0.61554	11.981		16.8579	6.17392	243.022
58422	32.88	0.61619	11.981		17.2246	6.18044	243.022
58623	32.5	0.61773	11.981		17.0255	6.19589	243.022
58823	32.4	0.61836	11.98		16.9731	6.20221	243.002
59024	33.08	0.61932	11.979		17.3293	6.21184	242.982
59224	32.72	0.62035	11.98		17.1407	6.22217	243.002
59424	33	0.62145	11.981		17.2874	6.2332	243.022
59625	33.22	0.62207	11.98		17.4027	6.23942	243.002
59825	32.98	0.62366	11.977		17.2769	6.25537	242.941
60026	32.62	0.62428	11.982		17.0884	6.26158	243.043
60226	33.1	0.62492	11.98		17.3398	6.268	243.002
60426	33.34	0.62643	11.98		17.4655	6.28315	243.002
60627	32.86	0.6272	11.979		17.2141	6.29087	242.982
60827	33.58	0.62795	11.984		17.5913	6.2984	243.083
61027	33.14	0.6296	11.978		17.3608	6.31494	242.961
61228	32.8	0.63032	11.979		17.1826	6.32217	242.982
61428	33.7	0.63081	11.982		17.6541	6.32708	243.043
61630	33.32	0.63254	11.98		17.4551	6.34443	243.002
61831	33.5	0.63318	11.98		17.5494	6.35085	243.002
62031	33.98	0.63381	11.98		17.8008	6.35717	243.002
62232	33.38	0.63522	11.98		17.4865	6.37131	243.002
62432	33.68	0.63591	11.979		17.6436	6.37823	242.982
62632	34.08	0.63697	11.98		17.8532	6.38887	243.002
62833	33.62	0.63823	11.981		17.6122	6.4015	243.022
63033	34.02	0.63879	11.981		17.8218	6.40712	243.022
63234	34.16	0.64014	11.981		17.8951	6.42066	243.022
63434	33.74	0.64089	11.98		17.6751	6.42818	243.002
63634	34.12	0.64166	11.979		17.8741	6.43591	242.982
63835	34.48	0.64283	11.981		18.0627	6.44764	243.022
64035	34.22	0.64392	11.978		17.9265	6.45858	242.961
64235	34.62	0.64488	11.983		18.1361	6.4682	243.063
64436	34.32	0.64589	11.981		17.9789	6.47834	243.022
64636	34.64	0.64678	11.981		18.1466	6.48726	243.022
64837	34.4	0.64766	11.98		18.0208	6.49609	243.002
65037	34.86	0.6489	11.981		18.2618	6.50853	243.022
65237	34.44	0.64995	11.979		18.0418	6.51906	242.982
65438	34.94	0.65067	11.981		18.3037	6.52628	243.022
65638	34.62	0.65178	11.979		18.1361	6.53741	242.982
65840	35.1	0.65242	11.98		18.3875	6.54383	243.002
66041	34.84	0.65381	11.98		18.2513	6.55777	243.002
66241	35.08	0.65442	11.982		18.3771	6.56389	243.043
66442	35.16	0.65569	11.978		18.419	6.57663	242.961
66642	35.3	0.65645	11.983		18.4923	6.58425	243.063
66842	35	0.65765	11.982		18.3351	6.59629	243.043
67043	35.4	0.65861	11.98		18.5447	6.60592	243.002
67243	35.12	0.65971	11.98		18.398	6.61695	243.002
67443	35.54	0.66036	11.979		18.618	6.62347	242.982
67644	35.4	0.66141	11.978		18.5447	6.634	242.961
67844	35.6	0.66244	11.982		18.6495	6.64433	243.043
68045	35.66	0.66332	11.979		18.6809	6.65316	242.982
68245	35.44	0.6646	11.978		18.5656	6.666	242.961
68445	35.74	0.66559	11.981		18.7228	6.67593	243.022
68646	35.74	0.66559	11.981		18.7228	6.67593	243.022
68846	35.88	0.66724	11.979		18.7961	6.69248	242.982
69048	35.58	0.66855	11.981		18.639	6.70562	243.022
69249	35.84	0.66926	11.98		18.7752	6.71274	243.002
69449	35.84	0.67066	11.982		18.7752	6.72678	243.043
69650	35.54	0.67136	11.978		18.618	6.7338	242.961
69850	36.24	0.67212	11.982		18.9847	6.74142	243.043
70050	35.78	0.67348	11.98		18.7438	6.75507	243.002
70251	36.22	0.67392	11.981		18.9743	6.75948	243.022
70451	35.92	0.67543	11.979		18.8171	6.77462	242.982
70651	36.04	0.67609	11.979		18.88	6.78124	242.982
70852	36.4	0.67746	11.981		19.0685	6.79498	243.022
71052	36.2	0.67813	11.98		18.9638	6.80171	243.002
71253	36.64	0.67908	11.982		19.1943	6.81123	243.043
71453	36.6	0.68019	11.978		19.1733	6.82237	242.961
71653	36.7	0.68116	11.984		19.2257	6.8321	243.083
71854	36.7	0.68186	11.982		19.2257	6.83912	243.043
72054	36.72	0.68315	11.98		19.2362	6.85206	243.002
72256	36.82	0.68391	11.982		19.2886	6.85968	243.043
72457	37.04	0.68514	11.982		19.4038	6.87202	243.043
72657	36.74	0.68604	11.981		19.2467	6.88104	243.022
72858	37.22	0.68677	11.98		19.4981	6.88837	243.002
73058	37.22	0.68677	11.98		19.4981	6.88837	243.002
73258	37.34	0.68893	11.979		19.561	6.91003	242.982
73459	36.96	0.68986	11.978		19.3619	6.91936	242.961
73659	37.48	0.69088	11.978		19.6343	6.92959	242.961
73860	37.14	0.6921	11.978		19.4562	6.94183	242.961
74060	37.4	0.69261	11.98		19.5924	6.94694	243.002
74260	37.36	0.69412	11.98		19.5715	6.96209	243.002
74461	37.36	0.69462	11.98		19.5715	6.9671	243.002
74661	37.56	0.69615	11.982		19.6762	6.98245	243.043
74861	37.28	0.69685	11.979		19.5295	6.98947	242.982
75062	37.66	0.69782	11.98		19.7286	6.9992	243.002
75262	37.6	0.69874	11.979		19.6972	7.00843	242.982
75464	37.78	0.69978	11.981		19.7915	7.01886	243.022
75665	37.64	0.70063	11.982		19.7181	7.02738	243.043
75865	38.1	0.70157	11.981		19.9591	7.03681	243.022
76066	37.54	0.70296	11.98		19.6658	7.05075	243.002
76266	37.8	0.70357	11.982		19.802	7.05687	243.043
76466	37.98	0.70511	11.984		19.8963	7.07232	243.083
76667	37.98	0.70551	11.98		19.8963	7.07633	243.002
76867	37.98	0.70691	11.978		19.8963	7.09037	242.961
77068	38.32	0.70749	11.98		20.0744	7.09619	243.002
77268	38.1	0.70877	11.98		19.9591	7.10903	243.002
77468	38.08	0.70947	11.98		19.9486	7.11605	243.002
77669	38.42	0.71055	11.978		20.1267	7.12688	242.961
77869	38.52	0.71122	11.981		20.1791	7.1336	243.022
78069	38.28	0.7127	11.978		20.0534	7.14845	242.961
78270	38.74	0.71344	11.979		20.2944	7.15587	242.982
78470	38.36	0.71447	11.98		20.0953	7.1662	243.002
78672	38.82	0.71541	11.982		20.3363	7.17563	243.043
78873	38.72	0.71625	11.98		20.2839	7.18405	243.002
79073	38.76	0.71753	11.979		20.3049	7.19689	242.982
79274	38.94	0.71827	11.981		20.3992	7.20431	243.022
79474	38.82	0.71921	11.982		20.3363	7.21374	243.043
79674	39.02	0.72024	11.98		20.4411	7.22407	243.002
79875	39.06	0.72143	11.98		20.462	7.23601	243.002
80075	38.84	0.72231	11.978		20.3468	7.24483	242.961
80276	39.22	0.72327	11.978		20.5458	7.25446	242.961
80476	39.08	0.72412	11.978		20.4725	7.26299	242.961
80676	38.98	0.72566	11.981		20.4201	7.27844	243.022
80877	39.12	0.72611	11.979		20.4935	7.28295	242.982
81077	39.4	0.72731	11.982		20.6401	7.29498	243.043
81277	39.5	0.72808	11.982		20.6925	7.30271	243.043
81478	39.4	0.72901	11.976		20.6401	7.31204	242.921
81678	39.56	0.73035	11.979		20.724	7.32548	242.982
81880	39.34	0.73113	11.979		20.6087	7.3333	242.982
82081	39.58	0.73225	11.98		20.7344	7.34453	243.002
82281	39.56	0.73305	11.98		20.724	7.35256	243.002
82482	39.72	0.7343	11.982		20.8078	7.3651	243.043
82682	39.72	0.735	11.981		20.8078	7.37212	243.022
82882	39.84	0.73626	11.981		20.8706	7.38475	243.022
83083	39.58	0.73705	11.982		20.7344	7.39268	243.043
83283	39.96	0.73771	11.982		20.9335	7.3993	243.043
83484	39.88	0.73904	11.984		20.8916	7.41264	243.083
83684	39.86	0.74015	11.978		20.8811	7.42377	242.961
83884	40.38	0.74067	11.98		21.1535	7.42899	243.002
84085	40.26	0.74181	11.979		21.0907	7.44042	242.982
84285	40.32	0.74279	11.978		21.1221	7.45025	242.961
84485	39.94	0.74402	11.981		20.923	7.46259	243.022
84686	40.52	0.74472	11.979		21.2269	7.46961	242.982
84886	40.54	0.74571	11.982		21.2373	7.47954	243.043
85087	40.62	0.74668	11.982		21.2792	7.48927	243.043
85287	40.42	0.74755	11.978		21.1745	7.49799	242.961
85487	40.66	0.74907	11.979		21.3002	7.51324	242.982
85688	40.62	0.74968	11.979		21.2792	7.51936	242.982
85888	40.94	0.75077	11.982		21.4469	7.53029	243.043
86090	41.12	0.75151	11.981		21.5412	7.53771	243.022
86291	40.92	0.75268	11.978		21.4364	7.54945	242.961
86491	41.06	0.75383	11.98		21.5097	7.56098	243.002
86692	41.22	0.75457	11.981		21.5936	7.56841	243.022
86892	40.78	0.75573	11.978		21.3631	7.58004	242.961
87092	41.3	0.75655	11.98		21.6355	7.58826	243.002
87293	41.18	0.75759	11.982		21.5726	7.5987	243.043
87493	41.42	0.7588	11.98		21.6983	7.61083	243.002
87693	41.36	0.75932	11.982		21.6669	7.61605	243.043
87894	41.18	0.76059	11.981		21.5726	7.62879	243.022
88094	41.52	0.76167	11.982		21.7507	7.63962	243.043
88295	41.7	0.76241	11.982		21.845	7.64704	243.043
88495	41.7	0.76241	11.982		21.845	7.64704	243.043
88695	41.82	0.76426	11.98		21.9079	7.6656	243.002
88896	41.32	0.76594	11.979		21.6459	7.68245	242.982
89096	41.44	0.7665	11.977		21.7088	7.68806	242.941
89298	41.9	0.76744	11.981		21.9498	7.69749	243.022
89499	41.5	0.76858	11.982		21.7402	7.70893	243.043
89699	42.02	0.76919	11.981		22.0126	7.71505	243.022
89900	41.82	0.77036	11.982		21.9079	7.72678	243.043
90100	41.9	0.77144	11.982		21.9498	7.73761	243.043
90300	42.18	0.77214	11.981		22.0965	7.74463	243.022
90501	42.16	0.77324	11.981		22.086	7.75567	243.022
90701	41.9	0.77443	11.98		21.9498	7.7676	243.002
90901	42.28	0.7752	11.98		22.1489	7.77533	243.002
91102	42.24	0.77622	11.98		22.1279	7.78556	243.002
91302	42.32	0.77739	11.981		22.1698	7.79729	243.022
91503	42.12	0.77816	11.979		22.065	7.80502	242.982
91703	42.66	0.77907	11.982		22.3479	7.81414	243.043
91903	42.36	0.78017	11.976		22.1908	7.82518	242.921
92104	42.76	0.78113	11.982		22.4003	7.8348	243.043
92304	42.82	0.78191	11.979		22.4317	7.84263	242.982
92506	42.52	0.78322	11.98		22.2746	7.85577	243.002
92707	42.94	0.78407	11.982		22.4946	7.86429	243.043
92907	42.68	0.78516	11.981		22.3584	7.87523	243.022
93108	43.16	0.78599	11.978		22.6099	7.88355	242.961
93308	43.08	0.78682	11.981		22.5679	7.89188	243.022
93508	43.14	0.7879	11.981		22.5994	7.90271	243.022
93709	43.06	0.78913	11.98		22.5575	7.91505	243.002
93909	42.96	0.78986	11.98		22.5051	7.92237	243.002
94110	43.24	0.79107	11.982		22.6518	7.9345	243.043
94310	43.54	0.79166	11.982		22.8089	7.94042	243.043
94510	43.54	0.79166	11.982		22.8089	7.94042	243.043
94711	43.52	0.79367	11.979		22.7984	7.96058	242.982
94911	43.38	0.79502	11.98		22.7251	7.97412	243.002
95111	43.36	0.79602	11.978		22.7146	7.98415	242.961
95312	43.56	0.79665	11.98		22.8194	7.99047	243.002
95512	43.48	0.79778	11.979		22.7775	8.00181	242.982
95714	43.56	0.79895	11.982		22.8194	8.01354	243.043
95915	43.74	0.79959	11.985		22.9137	8.01996	243.103
96115	43.74	0.80109	11.98		22.9137	8.03501	243.002
96316	43.8	0.80167	11.982		22.9451	8.04082	243.043
96516	43.94	0.80292	11.98		23.0185	8.05336	243.002
96716	43.66	0.80372	11.982		22.8718	8.06138	243.043
96917	44.18	0.80454	11.982		23.1442	8.06961	243.043
97117	43.92	0.80553	11.978		23.008	8.07954	242.961
97318	44.1	0.80677	11.98		23.1023	8.09198	243.002
97518	44.2	0.80763	11.976		23.1547	8.1006	242.921
97718	44.24	0.80842	11.981		23.1756	8.10853	243.022
97919	44.06	0.80968	11.977		23.0813	8.12116	242.941
98119	44.4	0.81026	11.981		23.2594	8.12698	243.022
98319	44.3	0.8116	11.98		23.2071	8.14042	243.002
98520	44.26	0.81281	11.981		23.1861	8.15256	243.022
98720	44.58	0.8133	11.978		23.3537	8.15747	242.961
98922	44.28	0.8146	11.978		23.1966	8.17051	242.961
99123	44.76	0.81533	11.977		23.448	8.17783	242.941
99323	44.66	0.81637	11.982		23.3956	8.18826	243.043
99524	44.76	0.81753	11.982		23.448	8.1999	243.043
99724	44.82	0.81851	11.978		23.4795	8.20973	242.961
99924	45	0.81965	11.98		23.5738	8.22116	243.002
100125	44.86	0.8203	11.98		23.5004	8.22768	243.002
100325	45.12	0.82141	11.981		23.6366	8.23882	243.022
100526	45.14	0.8222	11.983		23.6471	8.24674	243.063
100726	44.96	0.82326	11.978		23.5528	8.25737	242.961
100926	45.16	0.82459	11.982		23.6576	8.27071	243.043
101127	45.12	0.82511	11.981		23.6366	8.27593	243.022
101327	45.4	0.82651	11.977		23.7833	8.28997	242.941
101527	45.24	0.82717	11.978		23.6995	8.29659	242.961
101728	45.32	0.82844	11.981		23.7414	8.30933	243.022
101928	45.48	0.82908	11.98		23.8252	8.31575	243.002
102130	45.36	0.83042	11.979		23.7623	8.32919	242.982
102331	45.6	0.83094	11.981		23.8881	8.3344	243.022
102531	45.4	0.83251	11.982		23.7833	8.35015	243.043
102732	45.72	0.8331	11.978		23.9509	8.35607	242.961
102932	45.82	0.83386	11.981		24.0033	8.36369	243.022
103132	45.9	0.83504	11.978		24.0452	8.37553	242.961
103333	45.72	0.8361	11.981		23.9509	8.38616	243.022
103533	45.94	0.83692	11.982		24.0662	8.39438	243.043
103734	46.06	0.83788	11.979		24.129	8.40401	242.982
103934	45.8	0.83917	11.978		23.9928	8.41695	242.961
104134	46.24	0.83982	11.979		24.2233	8.42347	242.982
104335	45.82	0.84116	11.978		24.0033	8.43691	242.961
104535	46.3	0.8421	11.979		24.2548	8.44634	242.982
104735	46.42	0.84275	11.982		24.3176	8.45286	243.043
104936	46.34	0.84388	11.981		24.2757	8.46419	243.022
105136	46.36	0.84477	11.98		24.2862	8.47312	243.002
105337	46.22	0.84622	11.98		24.2129	8.48766	243.002
105537	46.5	0.84663	11.98		24.3595	8.49178	243.002
105737	46.54	0.84811	11.982		24.3805	8.50662	243.043
105938	46.64	0.84858	11.984		24.4329	8.51133	243.083
106138	46.66	0.84987	11.983		24.4434	8.52427	243.063
106340	46.8	0.85102	11.982		24.5167	8.53581	243.043
106541	46.68	0.85156	11.978		24.4538	8.54122	242.961
106741	46.66	0.85307	11.983		24.4434	8.55637	243.063
106942	47.08	0.85352	11.984		24.6634	8.56088	243.083
107142	47.08	0.85352	11.984		24.6634	8.56088	243.083
107342	47.1	0.85562	11.979		24.6739	8.58195	242.982
107543	46.86	0.8565	11.98		24.5481	8.59077	243.002
107743	47.02	0.85794	11.982		24.632	8.60522	243.043
107943	47.26	0.85846	11.98		24.7577	8.61043	243.002
108144	46.82	0.85971	11.982		24.5272	8.62297	243.043
108344	47.58	0.86075	11.98		24.9253	8.6334	243.002
108545	47.24	0.86147	11.982		24.7472	8.64062	243.043
108745	47.38	0.86272	11.982		24.8205	8.65316	243.043
108945	47.6	0.86334	11.977		24.9358	8.65938	242.941
109146	47.6	0.86334	11.977		24.9358	8.65938	242.941
109346	47.66	0.86552	11.979		24.9672	8.68124	242.982
109548	47.68	0.86631	11.981		24.9777	8.68917	243.022
109749	47.64	0.86733	11.98		24.9568	8.6994	243.002
109949	47.54	0.86866	11.98		24.9044	8.71274	243.002
110150	48	0.8693	11.98		25.1453	8.71916	243.002
110350	47.62	0.87043	11.983		24.9463	8.73049	243.063
110550	47.7	0.8716	11.981		24.9882	8.74223	243.022
110751	47.8	0.87267	11.98		25.0406	8.75296	243.002
110951	48.08	0.87337	11.978		25.1872	8.75998	242.961
111151	48.14	0.87415	11.98		25.2187	8.7678	243.002
111352	47.8	0.87537	11.98		25.0406	8.78004	243.002
111552	48.06	0.87648	11.979		25.1768	8.79117	242.982
111753	48.26	0.87711	11.982		25.2815	8.79749	243.043
111953	48	0.8783	11.978		25.1453	8.80943	242.961
112153	48.32	0.87949	11.98		25.313	8.82136	243.002
112354	48.22	0.88022	11.982		25.2606	8.82869	243.043
112554	48.34	0.88138	11.98		25.3235	8.84032	243.002
112756	48.56	0.8823	11.978		25.4387	8.84955	242.961
112957	48.46	0.88314	11.981		25.3863	8.85797	243.022
113157	48.56	0.8843	11.979		25.4387	8.86961	242.982
113358	48.8	0.88512	11.978		25.5644	8.87783	242.961
113558	48.6	0.88609	11.977		25.4597	8.88756	242.941
113758	48.98	0.88726	11.98		25.6587	8.8993	243.002
113959	48.82	0.88791	11.98		25.5749	8.90582	243.002
114159	48.84	0.88931	11.984		25.5854	8.91986	243.083
114360	49	0.88985	11.98		25.6692	8.92528	243.002
114560	49.02	0.89114	11.982		25.6797	8.93821	243.043
114760	49.32	0.89194	11.981		25.8368	8.94624	243.022
114961	48.9	0.89299	11.979		25.6168	8.95677	242.982
115161	48.86	0.8942	11.982		25.5959	8.96891	243.043
115361	49.32	0.89474	11.979		25.8368	8.97432	242.982
115562	49.32	0.89564	11.98		25.8368	8.98335	243.002
115762	49.3	0.89724	11.977		25.8264	8.9994	242.941
115964	49.5	0.89768	11.983		25.9311	9.00381	243.063
116165	49.28	0.89905	11.977		25.8159	9.01755	242.941
116365	49.66	0.89982	11.979		26.0149	9.02528	242.982
116566	49.68	0.90071	11.979		26.0254	9.0342	242.982
116766	49.38	0.90202	11.981		25.8683	9.04734	243.022
116966	49.84	0.90266	11.983		26.1092	9.05376	243.063
117167	49.74	0.90349	11.982		26.0569	9.06209	243.043
117367	49.54	0.90496	11.978		25.9521	9.07683	242.961
117568	50.06	0.90568	11.982		26.2245	9.08405	243.043
117768	49.88	0.90664	11.981		26.1302	9.09368	243.022
117968	49.82	0.90796	11.98		26.0988	9.10692	243.002
118169	50.16	0.90854	11.979		26.2769	9.11274	242.982
118369	50.28	0.9095	11.981		26.3397	9.12237	243.022
118569	49.8	0.91067	11.978		26.0883	9.1341	242.961
118770	50.34	0.91168	11.981		26.3712	9.14423	243.022
118970	50.34	0.91248	11.98		26.3712	9.15226	243.002
119172	50.3	0.9135	11.981		26.3502	9.16249	243.022
119373	50.3	0.9147	11.98		26.3502	9.17452	243.002
119573	50.58	0.9156	11.983		26.4969	9.18355	243.063
119774	50.62	0.91638	11.98		26.5179	9.19137	243.002
119974	50.16	0.91754	11.981		26.2769	9.20301	243.022
120174	50.62	0.91868	11.982		26.5179	9.21444	243.043
120375	50.62	0.91938	11.982		26.5179	9.22146	243.043
120575	50.66	0.92047	11.98		26.5388	9.2324	243.002
120776	50.62	0.92168	11.982		26.5179	9.24453	243.043
120976	50.96	0.92226	11.98		26.696	9.25035	243.002
121176	50.64	0.92348	11.98		26.5283	9.26259	243.002
121377	50.94	0.92427	11.98		26.6855	9.27051	243.002
121577	50.94	0.92557	11.982		26.6855	9.28355	243.043
121777	51.14	0.9262	11.98		26.7903	9.28987	243.002
121978	51.12	0.92721	11.979		26.7798	9.3	242.982
122178	51	0.92835	11.978		26.7169	9.31143	242.961
122380	50.96	0.92956	11.978		26.696	9.32357	242.961
122581	51.28	0.93045	11.978		26.8636	9.3325	242.961
122781	51.06	0.93123	11.979		26.7484	9.34032	242.982
122982	51.18	0.93249	11.979		26.8112	9.35296	242.982
123182	51.56	0.93305	11.981		27.0103	9.35858	243.022
123382	51.16	0.93429	11.977		26.8007	9.37101	242.941
123583	51.54	0.93536	11.981		26.9998	9.38175	243.022
123783	51.64	0.93603	11.979		27.0522	9.38847	242.982
123984	51.5	0.93718	11.982		26.9789	9.4	243.043
124184	51.62	0.93813	11.98		27.0417	9.40953	243.002
124384	51.42	0.9392	11.981		26.9369	9.42026	243.022
124585	51.72	0.9402	11.979		27.0941	9.43029	242.982
124785	51.92	0.94113	11.982		27.1989	9.43962	243.043
124985	51.84	0.94196	11.978		27.157	9.44794	242.961
125186	51.78	0.94298	11.98		27.1255	9.45817	243.002
125386	51.96	0.94421	11.983		27.2198	9.47051	243.063
125587	52.04	0.94499	11.98		27.2617	9.47834	243.002
125787	52.14	0.94595	11.98		27.3141	9.48796	243.002
125987	51.94	0.94692	11.979		27.2094	9.49769	242.982
126188	52.2	0.94803	11.982		27.3456	9.50883	243.043
126388	52.32	0.94879	11.979		27.4084	9.51645	242.982
126590	52.16	0.94994	11.979		27.3246	9.52798	242.982
126791	52.32	0.95099	11.981		27.4084	9.53852	243.022
126991	52.52	0.95182	11.98		27.5132	9.54684	243.002
127192	52.48	0.95293	11.981		27.4922	9.55797	243.022
127392	52.52	0.95392	11.98		27.5132	9.5679	243.002
127592	52.7	0.95495	11.981		27.6075	9.57823	243.022
127793	52.66	0.95577	11.979		27.5865	9.58646	242.982
127993	52.8	0.95672	11.979		27.6599	9.59599	242.982
128193	52.78	0.95763	11.982		27.6494	9.60512	243.043
128394	52.78	0.95883	11.98		27.6494	9.61715	243.002
128594	52.74	0.95984	11.98		27.6284	9.62728	243.002
128795	53.16	0.96079	11.98		27.8485	9.63681	243.002
128995	53.02	0.96164	11.982		27.7751	9.64534	243.043
129195	52.88	0.96299	11.982		27.7018	9.65888	243.043
129396	53.38	0.96352	11.985		27.9637	9.66419	243.103
129596	53.3	0.96455	11.982		27.9218	9.67452	243.043
129798	53.18	0.96559	11.98		27.8589	9.68495	243.002
129999	53.18	0.96669	11.98		27.8589	9.69599	243.002
130199	53.44	0.9677	11.981		27.9951	9.70612	243.022
130400	53.52	0.96867	11.981		28.0371	9.71585	243.022
130600	53.58	0.96955	11.978		28.0685	9.72467	242.961
130800	53.56	0.97035	11.979		28.058	9.7327	242.982
131001	53.5	0.97168	11.98		28.0266	9.74604	243.002
131201	53.88	0.97244	11.98		28.2256	9.75366	243.002
131401	53.7	0.97341	11.98		28.1313	9.76339	243.002
131602	53.72	0.9745	11.981		28.1418	9.77432	243.022
131802	53.86	0.97545	11.981		28.2152	9.78385	243.022
132003	53.84	0.97646	11.981		28.2047	9.79398	243.022
132203	53.96	0.97721	11.98		28.2676	9.8015	243.002
132403	53.9	0.97844	11.98		28.2361	9.81384	243.002
132604	53.82	0.97956	11.979		28.1942	9.82508	242.982
132804	54.24	0.98032	11.981		28.4142	9.8327	243.022
133006	54.32	0.98109	11.98		28.4561	9.84042	243.002
133207	54.14	0.98245	11.978		28.3618	9.85406	242.961
133407	54.4	0.98336	11.978		28.4981	9.86319	242.961
133608	54.48	0.98433	11.982		28.54	9.87292	243.043
133808	54.34	0.98518	11.98		28.4666	9.88144	243.002
134008	54.4	0.98596	11.978		28.4981	9.88927	242.961
134209	54.54	0.98721	11.978		28.5714	9.90181	242.961
134409	54.58	0.9882	11.982		28.5923	9.91174	243.043
134610	54.76	0.98903	11.982		28.6866	9.92006	243.043
134810	54.42	0.99015	11.98		28.5085	9.93129	243.002
135010	54.62	0.99118	11.979		28.6133	9.94162	242.982
135211	54.74	0.99214	11.981		28.6762	9.95125	243.022
135411	54.94	0.99287	11.981		28.7809	9.95858	243.022
135611	54.92	0.99408	11.979		28.7705	9.97071	242.982
135812	54.98	0.99506	11.985		28.8019	9.98054	243.103
136012	54.74	0.99614	11.981		28.6762	9.99137	243.022
136214	54.94	0.99727	11.98		28.7809	10.0027	243.002
136415	55.16	0.99789	11.979		28.8962	10.0089	242.982
136615	55	0.99915	11.981		28.8124	10.0216	243.022
136816	55.34	0.99993	11.978		28.9905	10.0294	242.961
137016	55.12	1.00091	11.982		28.8752	10.0392	243.043
137216	55.22	1.00207	11.98		28.9276	10.0509	243.002
137417	55.28	1.00315	11.982		28.9591	10.0617	243.043
137617	55.42	1.0039	11.981		29.0324	10.0692	243.022
137818	55.42	1.005	11.98		29.0324	10.0802	243.002
138018	55.38	1.00592	11.979		29.0114	10.0895	242.982
138218	55.48	1.00708	11.982		29.0638	10.1011	243.043
138419	55.52	1.00797	11.981		29.0848	10.11	243.022
138619	55.66	1.00882	11.983		29.1581	10.1186	243.063
138819	55.66	1.01012	11.979		29.1581	10.1316	242.982
139020	55.8	1.01077	11.98		29.2315	10.1381	243.002
139220	55.6	1.01184	11.981		29.1267	10.1488	243.022
139422	55.84	1.01296	11.98		29.2524	10.1601	243.002
139623	55.92	1.01373	11.98		29.2943	10.1678	243.002
139823	55.9	1.01484	11.98		29.2838	10.1789	243.002
140024	56.16	1.01564	11.979		29.42	10.187	242.982
140224	55.82	1.01676	11.979		29.2419	10.1982	242.982
140424	56.12	1.01766	11.979		29.3991	10.2072	242.982
140625	55.72	1.0188	11.978		29.1895	10.2187	242.961
140825	55.9	1.01973	11.98		29.2838	10.228	243.002
141026	56.3	1.02069	11.98		29.4934	10.2376	243.002
141226	56.48	1.02153	11.982		29.5877	10.246	243.043
141426	56.2	1.02263	11.981		29.441	10.2571	243.022
141627	56.38	1.02337	11.984		29.5353	10.2645	243.083
141827	56.26	1.02481	11.979		29.4724	10.2789	242.982
142027	56.64	1.02548	11.98		29.6715	10.2857	243.002
142228	56.62	1.02648	11.981		29.661	10.2957	243.022
142428	56.18	1.02764	11.979		29.4305	10.3073	242.982
142630	56.76	1.02863	11.981		29.7344	10.3173	243.022
142831	56.92	1.02938	11.979		29.8182	10.3248	242.982
143031	56.58	1.0305	11.982		29.6401	10.336	243.043
143232	56.84	1.03161	11.98		29.7763	10.3471	243.002
143432	56.82	1.03241	11.98		29.7658	10.3552	243.002
143632	56.96	1.03356	11.98		29.8391	10.3667	243.002
143833	57	1.03425	11.982		29.8601	10.3736	243.043
144033	56.88	1.03549	11.98		29.7972	10.3861	243.002
144234	57.24	1.03617	11.979		29.9858	10.3929	242.982
144434	57.06	1.03733	11.98		29.8915	10.4045	243.002
144634	57.12	1.03861	11.981		29.923	10.4174	243.022
144835	57.32	1.03934	11.978		30.0277	10.4247	242.961
145035	57.3	1.04014	11.982		30.0172	10.4327	243.043
145235	57.16	1.04159	11.982		29.9439	10.4472	243.043
145436	57.48	1.04208	11.982		30.1115	10.4522	243.043
145636	57.36	1.04332	11.978		30.0487	10.4646	242.961
145837	57.44	1.044	11.982		30.0906	10.4714	243.043
146037	57.54	1.04536	11.98		30.143	10.4851	243.002
146237	57.8	1.04607	11.98		30.2792	10.4922	243.002
146438	57.48	1.04718	11.98		30.1115	10.5033	243.002
146638	57.84	1.04806	11.981		30.3001	10.5121	243.022
146840	57.68	1.04931	11.981		30.2163	10.5247	243.022
147041	57.92	1.05003	11.979		30.342	10.5319	242.982
147241	57.92	1.05123	11.982		30.342	10.5439	243.043
147442	58.06	1.05198	11.981		30.4154	10.5515	243.022
147642	57.78	1.05318	11.978		30.2687	10.5635	242.961
147842	58.14	1.05435	11.98		30.4573	10.5752	243.002
148043	58.1	1.05487	11.981		30.4363	10.5804	243.022
148243	58.04	1.05609	11.981		30.4049	10.5927	243.022
148443	58.02	1.05729	11.98		30.3944	10.6047	243.002
148644	58.24	1.05802	11.981		30.5097	10.612	243.022
148844	58.14	1.05895	11.982		30.4573	10.6214	243.043
149045	58.22	1.06002	11.984		30.4992	10.6321	243.083
149245	58.46	1.06114	11.98		30.6249	10.6433	243.002
149445	58.26	1.06181	11.976		30.5202	10.6501	242.921
149646	58.4	1.06306	11.982		30.5935	10.6626	243.043
149846	58.56	1.0637	11.981		30.6773	10.669	243.022
150048	58.62	1.06498	11.981		30.7087	10.6818	243.022
150249	58.36	1.06587	11.978		30.5725	10.6908	242.961
150449	58.7	1.06685	11.98		30.7507	10.7006	243.002
150650	58.68	1.06786	11.98		30.7402	10.7107	243.002
150850	58.94	1.06857	11.98		30.8764	10.7179	243.002
151050	58.78	1.06993	11.981		30.7926	10.7315	243.022
151251	58.94	1.07077	11.983		30.8764	10.7399	243.063
151451	58.9	1.07169	11.978		30.8554	10.7491	242.961
151651	58.88	1.07269	11.982		30.845	10.7592	243.043
151852	58.8	1.07402	11.978		30.803	10.7725	242.961
152052	58.92	1.07478	11.978		30.8659	10.7801	242.961
152253	59.24	1.07567	11.98		31.0335	10.7891	243.002
152453	59.14	1.0767	11.983		30.9812	10.7994	243.063
152653	58.9	1.07779	11.981		30.8554	10.8103	243.022
152854	59.36	1.07872	11.98		31.0964	10.8197	243.002
153054	59.3	1.07945	11.979		31.065	10.827	242.982
153256	59.3	1.08074	11.981		31.065	10.8399	243.022
153457	59.36	1.08162	11.981		31.0964	10.8487	243.022
153657	59.56	1.08265	11.981		31.2012	10.8591	243.022
153858	58.98	1.08396	11.98		30.8973	10.8722	243.002
154058	59.26	1.08446	11.98		31.044	10.8772	243.002
154258	59.66	1.08572	11.98		31.2536	10.8899	243.002
154459	59.14	1.0869	11.978		30.9812	10.9017	242.961
154659	59.22	1.08767	11.978		31.0231	10.9094	242.961
154860	59.9	1.08824	11.981		31.3793	10.9151	243.022
155060	60	1.0894	11.981		31.4317	10.9268	243.022
155260	59.9	1.09064	11.98		31.3793	10.9392	243.002
155461	59.56	1.09155	11.98		31.2012	10.9483	243.002
155661	59.96	1.09231	11.978		31.4107	10.956	242.961
155861	60.16	1.09344	11.981		31.5155	10.9673	243.022
156062	59.74	1.09449	11.982		31.2955	10.9778	243.043
156262	60.26	1.09511	11.98		31.5679	10.9841	243.002
156464	60.22	1.09662	11.983		31.5469	10.9992	243.063
156665	59.76	1.09778	11.978		31.3059	11.0108	242.961
156865	59.94	1.09842	11.98		31.4002	11.0173	243.002
157066	59.94	1.09842	11.98		31.4002	11.0173	243.002
157266	59.64	1.10073	11.98		31.2431	11.0404	243.002
157466	60.04	1.10119	11.983		31.4526	11.045	243.063
157667	60.44	1.10205	11.982		31.6622	11.0537	243.043
157867	60.68	1.10336	11.981		31.7879	11.0668	243.022
158068	60.24	1.10452	11.981		31.5574	11.0784	243.022
158268	60.1	1.10517	11.98		31.4841	11.085	243.002
158468	60.78	1.10593	11.98		31.8403	11.0926	243.002
158669	60.46	1.10764	11.978		31.6727	11.1097	242.961
158869	60.26	1.10841	11.983		31.5679	11.1175	243.063
159069	60.92	1.10888	11.982		31.9136	11.1222	243.043
159270	61	1.11035	11.98		31.9555	11.1369	243.002
159470	60.32	1.11139	11.977		31.5993	11.1473	242.941
159672	60.44	1.11215	11.978		31.6622	11.155	242.961
159873	61.08	1.11282	11.978		31.9974	11.1617	242.961
160073	61.28	1.11395	11.979		32.1022	11.173	242.982
160274	60.74	1.11544	11.977		31.8193	11.188	242.941
160474	60.44	1.11635	11.978		31.6622	11.1971	242.961
160674	60.82	1.11701	11.981		31.8612	11.2037	243.022
160875	61.36	1.11772	11.98		32.1441	11.2108	243.002
161075	60.88	1.11949	11.98		31.8927	11.2286	243.002
161276	60.76	1.12023	11.982		31.8298	11.236	243.043
161476	61.02	1.12094	11.978		31.966	11.2431	242.961
161676	61.58	1.12175	11.98		32.2594	11.2513	243.002
161877	61.24	1.12327	11.982		32.0813	11.2665	243.043
162077	61.2	1.12388	11.978		32.0603	11.2726	242.961
162277	61.66	1.12482	11.98		32.3013	11.282	243.002
162478	61.32	1.12624	11.977		32.1232	11.2963	242.941
162678	61.6	1.12674	11.98		32.2699	11.3013	243.002
162880	61.74	1.12809	11.979		32.3432	11.3148	242.982
163081	61.38	1.12902	11.979		32.1546	11.3242	242.982
163281	61.86	1.12985	11.978		32.4061	11.3325	242.961
163482	61.82	1.13066	11.979		32.3851	11.3406	242.982
163682	61.64	1.13213	11.981		32.2908	11.3554	243.022
163882	61.44	1.133	11.981		32.186	11.3641	243.022
164083	62.02	1.13359	11.982		32.4899	11.37	243.043
164283	61.64	1.13493	11.98		32.2908	11.3835	243.002
164484	62.3	1.13549	11.98		32.6366	11.3891	243.002
164684	61.84	1.13706	11.977		32.3956	11.4048	242.941
164884	61.5	1.13797	11.981		32.2175	11.4139	243.022
165085	62.04	1.13859	11.981		32.5004	11.4202	243.022
165285	62.34	1.13988	11.979		32.6575	11.4331	242.982
165485	62.08	1.14067	11.98		32.5213	11.441	243.002
165686	62.38	1.14157	11.982		32.6785	11.4501	243.043
165886	62.32	1.14289	11.983		32.647	11.4633	243.063
166087	62.54	1.14341	11.981		32.7623	11.4685	243.022
166287	62.6	1.14479	11.985		32.7937	11.4823	243.103
166487	62.38	1.14557	11.981		32.6785	11.4902	243.022
166688	62.8	1.14632	11.981		32.8985	11.4977	243.022
166888	62.5	1.14762	11.981		32.7413	11.5107	243.022
167090	62.82	1.14861	11.982		32.909	11.5207	243.043
167291	62.18	1.14994	11.98		32.5737	11.534	243.002
167491	62.48	1.15053	11.983		32.7309	11.5399	243.063
167692	62.94	1.15177	11.982		32.9718	11.5524	243.043
167892	62.34	1.15288	11.977		32.6575	11.5635	242.941
168092	62.26	1.15371	11.977		32.6156	11.5718	242.941
168293	62.76	1.15433	11.982		32.8775	11.578	243.043
168493	63.22	1.15517	11.982		33.1185	11.5865	243.043
168693	62.72	1.15675	11.981		32.8566	11.6023	243.022
168894	62.52	1.15762	11.98		32.7518	11.611	243.002
169094	62.92	1.15828	11.98		32.9614	11.6177	243.002
169295	63.38	1.15922	11.98		33.2023	11.6271	243.002
169495	62.5	1.16083	11.98		32.7413	11.6432	243.002
169695	62.76	1.16153	11.977		32.8775	11.6503	242.941
169896	63.56	1.16215	11.98		33.2966	11.6565	243.002
170096	63.54	1.16306	11.981		33.2861	11.6656	243.022
170298	63.26	1.16446	11.981		33.1395	11.6796	243.022
170499	63.5	1.16527	11.982		33.2652	11.6878	243.043
170699	63.68	1.16641	11.982		33.3595	11.6992	243.043
170900	63.72	1.167	11.982		33.3804	11.7051	243.043
171100	63.36	1.16842	11.98		33.1918	11.7194	243.002
171300	63.8	1.16907	11.982		33.4223	11.7259	243.043
171501	63.44	1.1703	11.979		33.2338	11.7382	242.982
171701	63.66	1.17132	11.979		33.349	11.7484	242.982
171901	63.92	1.17203	11.979		33.4852	11.7556	242.982
172102	63.5	1.17327	11.981		33.2652	11.768	243.022
172302	63.98	1.17391	11.981		33.5166	11.7744	243.022
172503	63.58	1.17545	11.98		33.3071	11.7899	243.002
172703	63.62	1.17623	11.977		33.3281	11.7977	242.941
172903	64.22	1.17692	11.979		33.6424	11.8046	242.982
173104	63.92	1.17813	11.977		33.4852	11.8168	242.941
173304	64.3	1.17889	11.98		33.6843	11.8244	243.002
173506	64.3	1.17889	11.98		33.6843	11.8244	243.002
173707	64.34	1.18078	11.981		33.7052	11.8433	243.022
173907	64.44	1.18205	11.976		33.7576	11.8561	242.921
174108	64.44	1.18205	11.976		33.7576	11.8561	242.921
174308	64.44	1.18375	11.984		33.7576	11.8731	243.083
174508	64.64	1.18498	11.981		33.8624	11.8855	243.022
174709	64.32	1.18619	11.985		33.6948	11.8976	243.103
174909	64.5	1.18673	11.979		33.7891	11.903	242.982
175110	64.36	1.18837	11.982		33.7157	11.9195	243.043
175310	64.46	1.18884	11.983		33.7681	11.9242	243.063
175510	64.5	1.19002	11.979		33.7891	11.936	242.982
175711	64.66	1.19097	11.981		33.8729	11.9455	243.022
175911	64.22	1.19212	11.979		33.6424	11.9571	242.982
176111	64.82	1.19291	11.983		33.9567	11.965	243.063
176312	64.86	1.1938	11.98		33.9776	11.9739	243.002
176512	65	1.19485	11.978		34.051	11.9845	242.961
176714	65	1.19585	11.978		34.051	11.9945	242.961
176915	64.66	1.19677	11.98		33.8729	12.0037	243.002
177115	65.06	1.19793	11.98		34.0824	12.0153	243.002
177316	64.86	1.1987	11.982		33.9776	12.0231	243.043
177516	64.98	1.19996	11.98		34.0405	12.0357	243.002
177716	65.14	1.2006	11.982		34.1243	12.0421	243.043
177917	65.24	1.20187	11.981		34.1767	12.0549	243.022
178117	64.96	1.20266	11.98		34.03	12.0628	243.002
178318	65.22	1.20387	11.98		34.1662	12.0749	243.002
178518	65.42	1.2045	11.981		34.271	12.0812	243.022
178718	64.98	1.20606	11.979		34.0405	12.0969	242.982
178919	65.22	1.20657	11.982		34.1662	12.102	243.043
179119	65.3	1.20794	11.98		34.2081	12.1157	243.002
179319	65.3	1.20794	11.98		34.2081	12.1157	243.002
179520	65.52	1.20967	11.98		34.3234	12.1331	243.002
179720	65.52	1.20967	11.98		34.3234	12.1331	243.002
179922	65.66	1.21142	11.981		34.3967	12.1507	243.022
180123	65.66	1.21142	11.981		34.3967	12.1507	243.022
180323	65.62	1.21353	11.979		34.3758	12.1718	242.982
180524	65.58	1.21465	11.98		34.3548	12.183	243.002
180724	65.38	1.21592	11.979		34.25	12.1958	242.982
180924	65.76	1.21638	11.981		34.4491	12.2004	243.022
181125	65.76	1.21638	11.981		34.4491	12.2004	243.022
181325	65.74	1.21839	11.977		34.4386	12.2206	242.941
181526	65.84	1.21976	11.978		34.491	12.2343	242.961
181726	65.78	1.22068	11.981		34.4596	12.2435	243.022
181926	65.82	1.22176	11.981		34.4805	12.2544	243.022
182127	66	1.2225	11.981		34.5748	12.2618	243.022
182327	66.04	1.22349	11.977		34.5958	12.2717	242.941
182527	66.14	1.22425	11.982		34.6482	12.2793	243.043
182728	66.14	1.22425	11.982		34.6482	12.2793	243.043
182928	66.34	1.22618	11.979		34.753	12.2987	242.982
183130	66	1.2275	11.978		34.5748	12.3119	242.961
183331	66.3	1.2285	11.98		34.732	12.322	243.002
183531	66.28	1.2293	11.98		34.7215	12.33	243.002
183732	66.12	1.23046	11.98		34.6377	12.3416	243.002
183932	66.46	1.23124	11.982		34.8158	12.3494	243.043
184132	66.2	1.23263	11.983		34.6796	12.3634	243.063
184333	66.62	1.23338	11.978		34.8996	12.3709	242.961
184533	66.16	1.23424	11.98		34.6587	12.3795	243.002
184734	66.68	1.23536	11.982		34.9311	12.3908	243.043
184934	66.7	1.23606	11.98		34.9415	12.3978	243.002
185134	66.42	1.23725	11.978		34.7949	12.4097	242.961
185335	66.92	1.23818	11.978		35.0568	12.4191	242.961
185535	66.92	1.23818	11.978		35.0568	12.4191	242.961
185735	66.84	1.24001	11.981		35.0149	12.4374	243.022
185936	66.74	1.24134	11.981		34.9625	12.4508	243.022
186136	66.84	1.24201	11.978		35.0149	12.4575	242.961
186337	67.06	1.24323	11.981		35.1301	12.4697	243.022
186537	66.78	1.24423	11.98		34.9835	12.4797	243.002
186737	67.1	1.24512	11.979		35.1511	12.4887	242.982
186938	66.78	1.24633	11.98		34.9835	12.5008	243.002
187138	67.24	1.24687	11.982		35.2244	12.5062	243.043
187340	66.96	1.24806	11.979		35.0777	12.5182	242.982
187541	67.22	1.24937	11.982		35.214	12.5313	243.043
187741	66.84	1.25031	11.984		35.0149	12.5407	243.083
187942	67.5	1.25087	11.981		35.3606	12.5463	243.022
188142	67.22	1.25237	11.981		35.214	12.5614	243.022
188342	67.1	1.25302	11.981		35.1511	12.5679	243.022
188543	67.58	1.25385	11.983		35.4025	12.5762	243.063
188743	67.24	1.25507	11.981		35.2244	12.5885	243.022
188943	67.6	1.25604	11.982		35.413	12.5982	243.043
189144	67.58	1.25685	11.98		35.4025	12.6063	243.002
189344	67.28	1.25815	11.98		35.2454	12.6194	243.002
189545	67.64	1.25883	11.98		35.434	12.6262	243.002
189745	67.66	1.26012	11.98		35.4445	12.6391	243.002
189945	67.88	1.26074	11.982		35.5597	12.6453	243.043
190146	67.84	1.26226	11.981		35.5387	12.6606	243.022
190346	67.42	1.2631	11.98		35.3187	12.669	243.002
190548	68.02	1.26399	11.982		35.633	12.6779	243.043
190749	67.92	1.26473	11.978		35.5807	12.6854	242.961
190949	67.62	1.26603	11.979		35.4235	12.6984	242.982
191150	68.06	1.26668	11.98		35.654	12.7049	243.002
191350	67.56	1.26805	11.978		35.3921	12.7187	242.961
191550	68.2	1.26853	11.981		35.7273	12.7235	243.022
191751	67.78	1.26998	11.98		35.5073	12.738	243.002
191951	68.28	1.2706	11.98		35.7692	12.7442	243.002
192151	67.48	1.27218	11.979		35.3502	12.7601	242.982
192352	67.68	1.27281	11.981		35.4549	12.7664	243.022
192552	68.26	1.27391	11.979		35.7588	12.7774	242.982
192753	68.46	1.27464	11.978		35.8635	12.7848	242.961
192953	68.38	1.27557	11.982		35.8216	12.7941	243.043
193153	68.3	1.27709	11.978		35.7797	12.8093	242.961
193354	67.98	1.27781	11.979		35.6121	12.8165	242.982
193554	68.48	1.27843	11.981		35.874	12.8228	243.022
193756	68.34	1.27988	11.979		35.8007	12.8373	242.982
193957	68.48	1.28043	11.982		35.874	12.8428	243.043
194157	68.76	1.28173	11.981		36.0207	12.8559	243.022
194358	68.46	1.28254	11.98		35.8635	12.864	243.002
194558	68.24	1.28382	11.979		35.7483	12.8768	242.982
194758	68.84	1.28471	11.98		36.0626	12.8858	243.002
194959	68.82	1.28561	11.981		36.0521	12.8948	243.022
195159	68.84	1.28641	11.982		36.0626	12.9028	243.043
195360	68.64	1.28788	11.979		35.9578	12.9176	242.982
195560	68.24	1.28882	11.981		35.7483	12.927	243.022
195760	69.02	1.28944	11.981		36.1569	12.9332	243.022
195961	68.52	1.29062	11.984		35.895	12.945	243.083
196161	68.52	1.29062	11.984		35.895	12.945	243.083
196361	68.58	1.2927	11.976		35.9264	12.9659	242.921
196562	69.3	1.29324	11.979		36.3036	12.9713	242.982
196762	69.04	1.29464	11.981		36.1674	12.9854	243.022
196964	69.3	1.29534	11.983		36.3036	12.9924	243.063
197165	69.02	1.29644	11.98		36.1569	13.0034	243.002
197365	69.24	1.29757	11.982		36.2722	13.0147	243.043
197566	69.28	1.29825	11.98		36.2931	13.0216	243.002
197766	69.26	1.29966	11.981		36.2826	13.0357	243.022
197966	69.52	1.30017	11.979		36.4188	13.0408	242.982
198167	69.4	1.30161	11.98		36.356	13.0553	243.002
198367	69.56	1.30225	11.981		36.4398	13.0617	243.022
198568	69.38	1.30382	11.978		36.3455	13.0774	242.961
198768	69.34	1.30433	11.978		36.3245	13.0825	242.961
198968	69.64	1.30533	11.978		36.4817	13.0926	242.961
199169	69.6	1.30624	11.98		36.4607	13.1017	243.002
199369	69.6	1.30734	11.98		36.4607	13.1127	243.002
199569	69.34	1.30843	11.981		36.3245	13.1237	243.022
199770	69.74	1.30909	11.982		36.5341	13.1303	243.043
199970	69.92	1.31043	11.98		36.6284	13.1437	243.002
200172	69.64	1.31123	11.981		36.4817	13.1518	243.022
200373	69.68	1.31251	11.98		36.5027	13.1646	243.002
200573	70	1.3131	11.982		36.6703	13.1705	243.043
200774	70	1.3131	11.982		36.6703	13.1705	243.043
200974	70.08	1.31497	11.982		36.7122	13.1893	243.043
201174	69.76	1.31638	11.98		36.5446	13.2034	243.002
201375	70.28	1.317	11.981		36.817	13.2096	243.022
201575	69.96	1.31821	11.979		36.6493	13.2218	242.982
201776	70.22	1.31892	11.981		36.7855	13.2289	243.022
201976	70.4	1.32026	11.978		36.8798	13.2423	242.961
202176	69.7	1.32141	11.976		36.5131	13.2539	242.921
202377	70.18	1.32204	11.978		36.7646	13.2602	242.961
202577	70.18	1.32344	11.979		36.7646	13.2742	242.982
202777	70.06	1.32418	11.981		36.7017	13.2816	243.022
202978	70.06	1.32418	11.981		36.7017	13.2816	243.022
203178	70.08	1.32617	11.978		36.7122	13.3016	242.961
203380	70.72	1.32695	11.979		37.0475	13.3094	242.982
203581	70.6	1.32789	11.982		36.9846	13.3189	243.043
203781	70.06	1.32938	11.982		36.7017	13.3338	243.043
203982	70.24	1.33012	11.98		36.796	13.3412	243.002
204182	70.72	1.33065	11.983		37.0475	13.3465	243.063
204382	70.66	1.33227	11.982		37.016	13.3628	243.043
204583	70.96	1.33276	11.978		37.1732	13.3677	242.961
204783	70.58	1.3339	11.98		36.9741	13.3791	243.002
204984	70.8	1.33522	11.98		37.0894	13.3924	243.002
205184	70.52	1.33602	11.98		36.9427	13.4004	243.002
205384	70.52	1.33602	11.98		36.9427	13.4004	243.002
205585	70.62	1.33808	11.981		36.9951	13.4211	243.022
205785	71.08	1.33872	11.978		37.2361	13.4275	242.961
205985	70.58	1.3404	11.981		36.9741	13.4443	243.022
206186	70.7	1.34096	11.98		37.037	13.4499	243.002
206386	71.14	1.342	11.981		37.2675	13.4604	243.022
206587	71.14	1.342	11.981		37.2675	13.4604	243.022
206787	71.18	1.34359	11.982		37.2884	13.4763	243.043
206987	71	1.34495	11.98		37.1941	13.49	243.002
207188	71.12	1.34601	11.984		37.257	13.5006	243.083
207388	71.12	1.34681	11.979		37.257	13.5086	242.982
207590	71.24	1.34787	11.98		37.3199	13.5193	243.002
207791	71.4	1.34901	11.98		37.4037	13.5307	243.002
207991	71.4	1.34901	11.98		37.4037	13.5307	243.002
208192	71.46	1.35059	11.979		37.4351	13.5465	242.982
208392	71.42	1.352	11.979		37.4142	13.5607	242.982
208592	71.42	1.352	11.979		37.4142	13.5607	242.982
208793	71.5	1.35357	11.981		37.4561	13.5764	243.022
208993	71	1.35505	11.983		37.1941	13.5913	243.063
209193	71.64	1.35543	11.979		37.5294	13.5951	242.982
209394	71.42	1.3568	11.983		37.4142	13.6088	243.063
209594	71.78	1.35758	11.98		37.6028	13.6166	243.002
209795	71.4	1.35871	11.979		37.4037	13.628	242.982
209995	71.78	1.35958	11.982		37.6028	13.6367	243.043
210195	71.86	1.36065	11.982		37.6447	13.6474	243.043
210396	71.94	1.36132	11.979		37.6866	13.6542	242.982
210596	71.78	1.36308	11.98		37.6028	13.6718	243.002
210798	71.36	1.36372	11.983		37.3827	13.6782	243.063
210999	71.92	1.36443	11.978		37.6761	13.6854	242.961
211199	71.44	1.366	11.981		37.4246	13.7011	243.022
211400	71.94	1.36642	11.98		37.6866	13.7053	243.002
211600	71.78	1.36778	11.978		37.6028	13.719	242.961
211800	72.16	1.36834	11.978		37.8018	13.7246	242.961
212001	71.5	1.36997	11.978		37.4561	13.7409	242.961
212201	71.56	1.37065	11.982		37.4875	13.7477	243.043
212401	71.56	1.37065	11.982		37.4875	13.7477	243.043
212602	71.58	1.37265	11.978		37.498	13.7678	242.961
212802	72.26	1.37341	11.98		37.8542	13.7754	243.002
213003	72.12	1.37456	11.983		37.7809	13.787	243.063
213203	72.14	1.37575	11.982		37.7914	13.7989	243.043
213403	71.98	1.37651	11.977		37.7075	13.8065	242.941
213604	72.38	1.37757	11.984		37.9171	13.8172	243.083
213804	72	1.3786	11.98		37.718	13.8275	243.002
214006	72.32	1.37949	11.978		37.8856	13.8364	242.961
214207	72.46	1.38044	11.978		37.959	13.8459	242.961
214407	72.1	1.38177	11.978		37.7704	13.8593	242.961
214608	72.4	1.38226	11.981		37.9276	13.8642	243.022
214808	72.32	1.38369	11.982		37.8856	13.8785	243.043
215008	72.3	1.3844	11.98		37.8752	13.8857	243.002
215209	72.68	1.38566	11.982		38.0742	13.8983	243.043
215409	72.68	1.38566	11.982		38.0742	13.8983	243.043
215610	72.8	1.38712	11.982		38.1371	13.9129	243.043
215810	72.5	1.38832	11.977		37.9799	13.925	242.941
216010	72.86	1.3894	11.983		38.1685	13.9358	243.063
216211	72.62	1.39008	11.978		38.0428	13.9426	242.961
216411	72.96	1.39126	11.98		38.2209	13.9545	243.002
216611	73.06	1.39223	11.98		38.2733	13.9642	243.002
216812	73.04	1.39304	11.981		38.2628	13.9723	243.022
217012	72.44	1.39455	11.98		37.9485	13.9875	243.002
217214	72.42	1.39535	11.981		37.938	13.9955	243.022
217415	73.16	1.39589	11.981		38.3257	14.0009	243.022
217615	73.02	1.39754	11.978		38.2523	14.0175	242.961
217816	73.08	1.39822	11.981		38.2838	14.0243	243.022
218016	72.68	1.39956	11.98		38.0742	14.0377	243.002
218216	72.68	1.39956	11.98		38.0742	14.0377	243.002
218417	72.74	1.40154	11.984		38.1057	14.0576	243.083
218617	73.22	1.40207	11.978		38.3571	14.0629	242.961
218818	72.98	1.40356	11.978		38.2314	14.0778	242.961
219018	72.74	1.40434	11.98		38.1057	14.0857	243.002
219218	72.74	1.40434	11.98		38.1057	14.0857	243.002
219419	72.74	1.40624	11.977		38.1057	14.1047	242.941
219619	73.34	1.40703	11.98		38.42	14.1126	243.002
219819	73.24	1.40837	11.982		38.3676	14.1261	243.043
220020	73.6	1.40904	11.981		38.5562	14.1328	243.022
220220	73.36	1.41002	11.981		38.4305	14.1426	243.022
220422	73.34	1.41113	11.981		38.42	14.1538	243.022
220623	73.74	1.41199	11.98		38.6295	14.1624	243.002
220823	73.38	1.41332	11.98		38.4409	14.1757	243.002
221024	73.52	1.41397	11.98		38.5143	14.1822	243.002
221224	73.38	1.41512	11.978		38.4409	14.1938	242.961
221424	73.84	1.41576	11.979		38.6819	14.2002	242.982
221625	73.8	1.41717	11.984		38.661	14.2143	243.083
221825	73.4	1.41801	11.979		38.4514	14.2228	242.982
222026	73.9	1.41914	11.98		38.7133	14.2341	243.002
222226	73.86	1.41995	11.981		38.6924	14.2422	243.022
222426	73.9	1.42114	11.981		38.7133	14.2542	243.022
222627	74	1.4217	11.978		38.7657	14.2598	242.961
222827	73.7	1.42331	11.982		38.6086	14.2759	243.043
223027	74.14	1.42385	11.982		38.8391	14.2813	243.043
223228	74.14	1.42385	11.982		38.8391	14.2813	243.043
223428	74	1.4261	11.982		38.7657	14.3039	243.043
223630	74.16	1.42674	11.98		38.8496	14.3103	243.002
223831	74.08	1.42797	11.979		38.8076	14.3227	242.982
224031	74.38	1.42887	11.981		38.9648	14.3317	243.022
224232	74.2	1.42983	11.98		38.8705	14.3413	243.002
224432	73.98	1.43101	11.98		38.7553	14.3532	243.002
224632	74.38	1.43187	11.982		38.9648	14.3618	243.043
224833	74.38	1.43187	11.982		38.9648	14.3618	243.043
225033	74.44	1.43385	11.978		38.9962	14.3816	242.961
225234	74.28	1.4347	11.98		38.9124	14.3902	243.002
225434	73.92	1.43593	11.981		38.7238	14.4025	243.022
225634	74.48	1.43663	11.98		39.0172	14.4095	243.002
225835	74.24	1.43802	11.98		38.8915	14.4235	243.002
226035	74.14	1.43875	11.981		38.8391	14.4308	243.022
226235	74.64	1.43988	11.983		39.101	14.4421	243.063
226436	74.64	1.43988	11.983		39.101	14.4421	243.063
226636	74.78	1.44173	11.981		39.1743	14.4607	243.022
226837	74.42	1.44275	11.984		38.9858	14.4709	243.083
227037	74.76	1.44373	11.982		39.1639	14.4807	243.043
227237	74.2	1.44513	11.98		38.8705	14.4948	243.002
227438	74.12	1.44586	11.98		38.8286	14.5021	243.002
227638	74.66	1.44647	11.981		39.1115	14.5082	243.022
227840	74.76	1.44783	11.977		39.1639	14.5219	242.941
228041	75.04	1.44864	11.979		39.3105	14.53	242.982
228241	74.54	1.44981	11.981		39.0486	14.5417	243.022
228442	75	1.45065	11.98		39.2896	14.5502	243.002
228642	74.98	1.45166	11.978		39.2791	14.5603	242.961
228842	74.62	1.45298	11.984		39.0905	14.5735	243.083
229043	74.48	1.45363	11.982		39.0172	14.58	243.043
229243	75.22	1.45447	11.98		39.4048	14.5885	243.002
229443	74.96	1.45576	11.983		39.2686	14.6014	243.063
229644	75.2	1.45658	11.982		39.3944	14.6096	243.043
229844	75.26	1.45756	11.98		39.4258	14.6195	243.002
230045	75.4	1.45851	11.982		39.4991	14.629	243.043
230245	75.1	1.45941	11.98		39.342	14.638	243.002
230445	75.2	1.46098	11.98		39.3944	14.6538	243.002
230646	74.88	1.46159	11.981		39.2267	14.6599	243.022
230846	75.44	1.4625	11.98		39.5201	14.669	243.002
231048	75.18	1.46369	11.979		39.3839	14.6809	242.982
231249	75.58	1.46455	11.981		39.5934	14.6896	243.022
231449	75.58	1.46455	11.981		39.5934	14.6896	243.022
231650	75.38	1.46642	11.982		39.4887	14.7083	243.043
231850	74.88	1.46769	11.978		39.2267	14.7211	242.961
232050	75.6	1.46824	11.98		39.6039	14.7266	243.002
232251	75.38	1.46962	11.979		39.4887	14.7404	242.982
232451	75.54	1.47036	11.978		39.5725	14.7478	242.961
232651	75.46	1.47169	11.98		39.5306	14.7612	243.002
232852	75.62	1.47243	11.98		39.6144	14.7686	243.002
233052	75.64	1.47353	11.982		39.6249	14.7796	243.043
233253	75.2	1.47448	11.98		39.3944	14.7892	243.002
233453	75.58	1.47555	11.983		39.5934	14.7999	243.063
233653	75.7	1.4762	11.982		39.6563	14.8064	243.043
233854	75.22	1.47757	11.979		39.4048	14.8202	242.982
234054	75.84	1.47846	11.979		39.7296	14.8291	242.982
234256	75.6	1.47924	11.98		39.6039	14.8369	243.002
234457	75.74	1.48069	11.982		39.6773	14.8515	243.043
234657	75.34	1.48143	11.978		39.4677	14.8589	242.961
234858	75.84	1.48236	11.977		39.7296	14.8682	242.941
235058	76.1	1.48336	11.98		39.8658	14.8782	243.002
235258	76	1.4842	11.981		39.8135	14.8867	243.022
235459	75.66	1.48542	11.978		39.6353	14.8989	242.961
235659	76.22	1.48632	11.982		39.9287	14.9079	243.043
235860	75.98	1.48731	11.979		39.803	14.9179	242.982
236060	75.98	1.48841	11.979		39.803	14.9289	242.982
236260	76.18	1.48924	11.981		39.9078	14.9372	243.022
236461	76.26	1.49031	11.983		39.9497	14.9479	243.063
236661	76.24	1.49112	11.978		39.9392	14.9561	242.961
236861	76.24	1.49242	11.98		39.9392	14.9691	243.002
237062	76.4	1.49306	11.98		40.023	14.9755	243.002
237262	76.34	1.49408	11.98		39.9916	14.9858	243.002
237464	76.24	1.49532	11.982		39.9392	14.9982	243.043
237665	76.52	1.49622	11.982		40.0859	15.0072	243.043
237865	76.16	1.49714	11.977		39.8973	15.0164	242.941
238066	76.4	1.49846	11.982		40.023	15.0297	243.043
238266	76.56	1.499	11.977		40.1068	15.0351	242.941
238466	76.22	1.50042	11.982		39.9287	15.0493	243.043
238667	76.74	1.50104	11.981		40.2011	15.0556	243.022
238867	76.38	1.50217	11.98		40.0125	15.0669	243.002
239068	76.64	1.50338	11.979		40.1487	15.079	242.982
239268	76.44	1.50415	11.977		40.044	15.0868	242.941
239468	76.38	1.50517	11.98		40.0125	15.097	243.002
239669	76.74	1.50594	11.98		40.2011	15.1047	243.002
239869	76.54	1.50741	11.98		40.0963	15.1195	243.002
240069	76.68	1.50796	11.981		40.1697	15.125	243.022
240270	76.44	1.50925	11.981		40.044	15.1379	243.022
240470	76.74	1.50984	11.984		40.2011	15.1438	243.083
240672	76.56	1.5112	11.981		40.1068	15.1575	243.022
240873	76.98	1.51186	11.977		40.3268	15.1641	242.941
241073	76.32	1.51349	11.983		39.9811	15.1804	243.063
241274	76.7	1.51406	11.981		40.1802	15.1862	243.022
241474	77	1.51515	11.98		40.3373	15.1971	243.002
241674	77.04	1.51574	11.979		40.3583	15.203	242.982
241875	76.76	1.51723	11.98		40.2116	15.218	243.002
242075	77.18	1.51809	11.98		40.4316	15.2266	243.002
242276	76.82	1.51921	11.983		40.243	15.2378	243.063
242476	77.26	1.51976	11.984		40.4735	15.2433	243.083
242676	76.78	1.52113	11.981		40.2221	15.2571	243.022
242877	76.78	1.52113	11.981		40.2221	15.2571	243.022
243077	76.78	1.52303	11.982		40.2221	15.2761	243.043
243277	76.78	1.52303	11.982		40.2221	15.2761	243.043
243478	76.78	1.52513	11.98		40.2221	15.2972	243.002
243678	76.92	1.52588	11.98		40.2954	15.3047	243.002
243880	77.5	1.52657	11.979		40.5992	15.3116	242.982
244081	77.22	1.52827	11.976		40.4526	15.3287	242.921
244281	77.42	1.5287	11.98		40.5573	15.333	243.002
244482	77.06	1.53033	11.979		40.3687	15.3493	242.982
244682	76.8	1.53102	11.982		40.2325	15.3563	243.043
244882	77.22	1.53187	11.982		40.4526	15.3648	243.043
245083	77.82	1.53256	11.982		40.7669	15.3717	243.043
245283	77.36	1.53392	11.981		40.5259	15.3854	243.022
245484	77.38	1.53502	11.981		40.5364	15.3964	243.022
245684	77.68	1.53571	11.982		40.6935	15.4033	243.043
245884	77.46	1.53679	11.979		40.5783	15.4141	242.982
246085	77.48	1.53798	11.982		40.5888	15.4261	243.043
246285	77.7	1.53861	11.982		40.704	15.4324	243.043
246485	77.64	1.54013	11.981		40.6726	15.4476	243.022
246686	77.4	1.54081	11.984		40.5469	15.4545	243.083
246886	77.72	1.542	11.982		40.7145	15.4664	243.043
247087	77.72	1.542	11.982		40.7145	15.4664	243.043
247287	77.8	1.54357	11.981		40.7564	15.4821	243.022
247487	77.52	1.54507	11.98		40.6097	15.4972	243.002
247688	77.66	1.54572	11.98		40.6831	15.5037	243.002
247888	77.88	1.54684	11.984		40.7983	15.5149	243.083
248090	77.64	1.54763	11.981		40.6726	15.5229	243.022
248291	78.14	1.54845	11.979		40.9345	15.5311	242.982
248491	77.62	1.55003	11.98		40.6621	15.5469	243.002
248692	77.86	1.55055	11.98		40.7878	15.5522	243.002
248892	78.12	1.55176	11.98		40.924	15.5643	243.002
249092	77.72	1.5527	11.98		40.7145	15.5737	243.002
249293	78.22	1.55382	11.983		40.9764	15.585	243.063
249493	78.22	1.55382	11.983		40.9764	15.585	243.063
249693	78.22	1.55542	11.977		40.9764	15.601	242.941
249894	77.92	1.55683	11.983		40.8193	15.6151	243.063
250094	78.3	1.55739	11.982		41.0183	15.6208	243.043
250295	77.62	1.55913	11.979		40.6621	15.6382	242.982
250495	78.02	1.55959	11.984		40.8717	15.6428	243.083
250695	78.3	1.56079	11.981		41.0183	15.6549	243.022
250896	78.3	1.5614	11.977		41.0183	15.661	242.941
251096	77.76	1.56288	11.98		40.7355	15.6758	243.002
251298	77.96	1.56351	11.98		40.8402	15.6821	243.002
251499	78.18	1.56484	11.98		40.9555	15.6955	243.002
251699	78.3	1.5655	11.98		41.0183	15.7021	243.002
251900	78.4	1.56666	11.982		41.0707	15.7137	243.043
252100	78.02	1.56769	11.978		40.8717	15.7241	242.961
252300	78.4	1.56866	11.98		41.0707	15.7338	243.002
252501	78.54	1.56941	11.98		41.1441	15.7413	243.002
252701	78.28	1.5705	11.978		41.0079	15.7523	242.961
252901	78.24	1.57182	11.983		40.9869	15.7655	243.063
253102	78.6	1.57239	11.984		41.1755	15.7712	243.083
253302	78.14	1.57375	11.978		40.9345	15.7849	242.961
253503	78.18	1.57454	11.978		40.9555	15.7928	242.961
253703	78.18	1.57454	11.978		40.9555	15.7928	242.961
253903	78.02	1.57679	11.98		40.8717	15.8153	243.002
254104	78.64	1.57758	11.98		41.1964	15.8233	243.002
254304	78.46	1.57854	11.981		41.1022	15.8329	243.022
254506	78.54	1.57971	11.979		41.1441	15.8446	242.982
254707	78.84	1.58061	11.979		41.3012	15.8537	242.982
254907	78.76	1.58133	11.98		41.2593	15.8609	243.002
255108	78.48	1.58253	11.982		41.1126	15.8729	243.043
255308	78.84	1.58351	11.979		41.3012	15.8827	242.982
255508	78.66	1.58447	11.981		41.2069	15.8924	243.022
255709	78.98	1.58536	11.979		41.3746	15.9013	242.982
255909	78.72	1.58645	11.982		41.2384	15.9122	243.043
256110	78.68	1.58766	11.979		41.2174	15.9244	242.982
256310	79	1.58815	11.978		41.385	15.9293	242.961
256510	78.84	1.58941	11.98		41.3012	15.9419	243.002
256711	79.14	1.5905	11.979		41.4584	15.9529	242.982
256911	78.78	1.59153	11.983		41.2698	15.9632	243.063
257111	79.1	1.59251	11.984		41.4374	15.973	243.083
257312	78.92	1.59338	11.981		41.3431	15.9817	243.022
257512	79.06	1.59443	11.983		41.4165	15.9923	243.063
257714	79.2	1.59548	11.981		41.4898	16.0028	243.022
257915	79.2	1.59618	11.982		41.4898	16.0098	243.043
258115	79	1.59745	11.98		41.385	16.0226	243.002
258316	79.16	1.59859	11.982		41.4689	16.034	243.043
258516	79.04	1.59934	11.981		41.406	16.0415	243.022
258716	79.2	1.60058	11.98		41.4898	16.054	243.002
258917	78.98	1.60136	11.981		41.3746	16.0618	243.022
259117	79.42	1.6024	11.981		41.6051	16.0722	243.022
259318	78.96	1.60346	11.981		41.3641	16.0828	243.022
259518	79.36	1.60442	11.976		41.5736	16.0925	242.921
259718	79.44	1.605	11.981		41.6155	16.0983	243.022
259919	78.94	1.60657	11.98		41.3536	16.114	243.002
260119	79.38	1.60712	11.98		41.5841	16.1196	243.002
260319	79.1	1.60842	11.98		41.4374	16.1326	243.002
260520	79.32	1.60944	11.979		41.5527	16.1428	242.982
260720	79.32	1.61044	11.981		41.5527	16.1529	243.022
260922	79.54	1.61116	11.984		41.6679	16.1601	243.083
261123	79.54	1.61116	11.984		41.6679	16.1601	243.083
261323	79.66	1.61312	11.982		41.7308	16.1797	243.043
261524	79.4	1.61441	11.981		41.5946	16.1927	243.022
261724	79.68	1.61551	11.98		41.7413	16.2037	243.002
261924	79.36	1.61612	11.977		41.5736	16.2098	242.941
262125	79.3	1.61734	11.979		41.5422	16.2221	242.982
262325	79.62	1.61843	11.979		41.7098	16.233	242.982
262526	79.64	1.61913	11.978		41.7203	16.24	242.961
262726	79.86	1.62035	11.98		41.8356	16.2523	243.002
262926	79.4	1.62131	11.983		41.5946	16.2619	243.063
263127	79.9	1.62234	11.979		41.8565	16.2722	242.982
263327	79.72	1.623	11.98		41.7622	16.2788	243.002
263527	79.42	1.6245	11.98		41.6051	16.2939	243.002
263728	79.74	1.62499	11.982		41.7727	16.2988	243.043
263928	79.66	1.62632	11.98		41.7308	16.3121	243.002
264130	79.9	1.62684	11.978		41.8565	16.3174	242.961
264331	79.32	1.62854	11.979		41.5527	16.3344	242.982
264531	79.2	1.62928	11.98		41.4898	16.3418	243.002
264732	80.14	1.62995	11.981		41.9822	16.3485	243.022
264932	79.74	1.63149	11.977		41.7727	16.364	242.941
265132	80.1	1.63196	11.98		41.9613	16.3687	243.002
265333	79.38	1.63342	11.978		41.5841	16.3834	242.961
265533	79.86	1.63405	11.982		41.8356	16.3897	243.043
265734	79.9	1.63544	11.983		41.8565	16.4036	243.063
265934	79.96	1.63621	11.979		41.8879	16.4113	242.982
266134	80.14	1.63715	11.983		41.9822	16.4208	243.063
266335	79.82	1.63816	11.98		41.8146	16.4309	243.002
266535	79.88	1.63944	11.978		41.846	16.4437	242.961
266735	80.16	1.63994	11.981		41.9927	16.4487	243.022
266936	79.74	1.64149	11.979		41.7727	16.4643	242.982
267136	79.74	1.64149	11.979		41.7727	16.4643	242.982
267337	79.78	1.64358	11.982		41.7937	16.4853	243.043
267537	80.16	1.64404	11.979		41.9927	16.4899	242.982
267737	80.34	1.64498	11.98		42.087	16.4993	243.002
267938	80.38	1.64617	11.98		42.108	16.5112	243.002
268138	80.1	1.64716	11.98		41.9613	16.5212	243.002
268340	80.34	1.64808	11.982		42.087	16.5304	243.043
268541	80	1.649	11.982		41.9089	16.5396	243.043
268741	80.32	1.64979	11.982		42.0765	16.5475	243.043
268942	80.56	1.651	11.981		42.2023	16.5597	243.022
269142	80.56	1.651	11.981		42.2023	16.5597	243.022
269342	80.42	1.65275	11.983		42.1289	16.5772	243.063
269543	79.96	1.65411	11.978		41.8879	16.5909	242.961
269743	80.66	1.65477	11.983		42.2546	16.5975	243.063
269943	80.38	1.65607	11.981		42.108	16.6105	243.022
270144	80.74	1.65664	11.981		42.2966	16.6162	243.022
270344	80.42	1.65815	11.979		42.1289	16.6314	242.982
270545	80.38	1.65887	11.981		42.108	16.6386	243.022
270745	80.66	1.66017	11.979		42.2546	16.6517	242.982
270945	80.42	1.66095	11.981		42.1289	16.6595	243.022
271146	80.8	1.66192	11.981		42.328	16.6692	243.022
271346	80.84	1.66311	11.982		42.3489	16.6811	243.043
271548	80.88	1.66389	11.979		42.3699	16.689	242.982
271749	80	1.6652	11.979		41.9089	16.7021	242.982
271949	80.34	1.66588	11.98		42.087	16.7089	243.002
272150	80.34	1.66588	11.98		42.087	16.7089	243.002
272350	80.3	1.66799	11.981		42.0661	16.7301	243.022
272550	80.76	1.66913	11.982		42.307	16.7415	243.043
272751	80.3	1.6699	11.98		42.0661	16.7492	243.002
272951	80.98	1.67056	11.982		42.4223	16.7559	243.043
273151	81.08	1.67182	11.98		42.4747	16.7685	243.002
273352	81.08	1.67182	11.98		42.4747	16.7685	243.002
273552	81.08	1.67372	11.978		42.4747	16.7876	242.961
273753	80.68	1.67496	11.98		42.2651	16.8	243.002
273953	81.14	1.6755	11.976		42.5061	16.8054	242.921
274153	81.12	1.67701	11.982		42.4956	16.8206	243.043
274354	81.12	1.67701	11.982		42.4956	16.8206	243.043
274554	81.2	1.67868	11.98		42.5375	16.8373	243.002
274756	80.9	1.67989	11.978		42.3804	16.8494	242.961
274957	81.28	1.68065	11.979		42.5794	16.8571	242.982
275157	80.52	1.68212	11.982		42.1813	16.8718	243.043
275358	80.98	1.68276	11.981		42.4223	16.8782	243.022
275558	81.26	1.68386	11.979		42.569	16.8893	242.982
275758	81.26	1.68466	11.981		42.569	16.8973	243.022
275959	80.96	1.68576	11.981		42.4118	16.9083	243.022
276159	81.08	1.68712	11.982		42.4747	16.922	243.043
276360	80.66	1.68767	11.98		42.2546	16.9275	243.002
276560	80.66	1.68767	11.98		42.2546	16.9275	243.002
276760	80.74	1.69004	11.978		42.2966	16.9513	242.961
276961	81.46	1.69049	11.98		42.6737	16.9558	243.002
277161	81.14	1.6919	11.984		42.5061	16.9699	243.083
277361	81.16	1.69269	11.979		42.5166	16.9778	242.982
277562	81.6	1.69354	11.984		42.7471	16.9864	243.083
277762	81	1.69485	11.978		42.4328	16.9995	242.961
277964	81.38	1.69582	11.978		42.6318	17.0092	242.961
278165	81.58	1.69665	11.981		42.7366	17.0176	243.022
278365	81.6	1.69764	11.982		42.7471	17.0275	243.043
278566	81.56	1.69875	11.98		42.7261	17.0386	243.002
278766	81.3	1.69955	11.977		42.5899	17.0466	242.941
278966	81.56	1.70085	11.98		42.7261	17.0597	243.002
279167	81.16	1.70169	11.981		42.5166	17.0681	243.022
279367	81.44	1.7029	11.981		42.6633	17.0802	243.022
279568	81.56	1.70365	11.981		42.7261	17.0878	243.022
279768	81.54	1.70476	11.982		42.7156	17.0989	243.043
279968	81.7	1.70571	11.977		42.7995	17.1084	242.941
280169	81.84	1.70646	11.981		42.8728	17.1159	243.022
280369	81.84	1.70646	11.981		42.8728	17.1159	243.022
280569	81.8	1.70837	11.982		42.8519	17.1351	243.043
280770	81.86	1.70975	11.979		42.8833	17.1489	242.982
280970	81.86	1.70975	11.979		42.8833	17.1489	242.982
281172	81.84	1.71166	11.981		42.8728	17.1681	243.022
281373	81.78	1.71238	11.978		42.8414	17.1753	242.961
281573	81.74	1.71369	11.98		42.8204	17.1885	243.002
281774	81.94	1.71452	11.978		42.9252	17.1968	242.961
281974	82.02	1.71559	11.982		42.9671	17.2075	243.043
282174	81.94	1.71642	11.982		42.9252	17.2158	243.043
282375	81.56	1.71775	11.981		42.7261	17.2292	243.022
282575	81.64	1.71853	11.979		42.768	17.237	242.982
282776	81.76	1.71998	11.98		42.8309	17.2516	243.002
282976	81.44	1.7207	11.98		42.6633	17.2588	243.002
283176	81.44	1.7207	11.98		42.6633	17.2588	243.002
283377	81.56	1.72295	11.98		42.7261	17.2813	243.002
283577	81.84	1.72356	11.979		42.8728	17.2875	242.982
283777	82.14	1.72465	11.981		43.03	17.2984	243.022
283978	81.36	1.72572	11.978		42.6214	17.3091	242.961
284178	81.7	1.72661	11.982		42.7995	17.3181	243.043
284380	81.7	1.72661	11.982		42.7995	17.3181	243.043
284581	81.48	1.72868	11.979		42.6842	17.3388	242.982
284781	82.12	1.72926	11.979		43.0195	17.3446	242.982
284982	82.2	1.73053	11.982		43.0614	17.3574	243.043
285182	82.18	1.73124	11.981		43.0509	17.3645	243.022
285382	82.02	1.73249	11.979		42.9671	17.377	242.982
285583	82.12	1.73366	11.98		43.0195	17.3888	243.002
285783	82.08	1.73427	11.978		42.9985	17.3949	242.961
285984	82.44	1.73565	11.982		43.1871	17.4087	243.043
286184	82.22	1.73642	11.983		43.0719	17.4164	243.063
286384	82.54	1.73751	11.981		43.2395	17.4274	243.022
286585	82.18	1.73864	11.981		43.0509	17.4387	243.022
286785	81.88	1.73954	11.98		42.8938	17.4477	243.002
286985	81.88	1.73954	11.98		42.8938	17.4477	243.002
287186	82.06	1.74178	11.982		42.9881	17.4702	243.043
287386	82.44	1.74225	11.983		43.1871	17.4749	243.063
287587	82.42	1.74365	11.978		43.1766	17.489	242.961
287787	81.96	1.74461	11.981		42.9357	17.4986	243.022
287987	82.5	1.74523	11.98		43.2186	17.5048	243.002
288188	82.08	1.74657	11.982		42.9985	17.5183	243.043
288388	82.48	1.74723	11.977		43.2081	17.5249	242.941
288590	82.38	1.74827	11.982		43.1557	17.5353	243.043
288791	82.3	1.7494	11.978		43.1138	17.5466	242.961
288991	82.62	1.75048	11.979		43.2814	17.5575	242.982
289192	82.74	1.75114	11.982		43.3443	17.5641	243.043
289392	82.1	1.75257	11.979		43.009	17.5784	242.982
289592	82.5	1.75322	11.982		43.2186	17.585	243.043
289793	82.66	1.75457	11.98		43.3024	17.5985	243.002
289993	82.1	1.75576	11.981		43.009	17.6104	243.022
290193	82.08	1.75647	11.978		42.9985	17.6176	242.961
290394	82.08	1.75647	11.978		42.9985	17.6176	242.961
290594	82.3	1.75849	11.98		43.1138	17.6378	243.002
290795	82.92	1.75948	11.983		43.4386	17.6477	243.063
290995	82.62	1.76028	11.982		43.2814	17.6558	243.043
291195	82.98	1.76136	11.98		43.47	17.6666	243.002
291396	82.58	1.7624	11.98		43.2605	17.677	243.002
291596	83.02	1.76324	11.982		43.491	17.6855	243.043
291798	83.02	1.76324	11.982		43.491	17.6855	243.043
291999	83.12	1.76531	11.981		43.5433	17.7062	243.022
292199	82.48	1.76643	11.979		43.2081	17.7175	242.982
292400	82.92	1.76738	11.98		43.4386	17.727	243.002
292600	83.08	1.76822	11.984		43.5224	17.7354	243.083
292800	82.7	1.76926	11.98		43.3233	17.7458	243.002
293001	82.76	1.77053	11.979		43.3548	17.7586	242.982
293201	83.16	1.77109	11.98		43.5643	17.7642	243.002
293401	82.9	1.77209	11.977		43.4281	17.7742	242.941
293602	83.24	1.77327	11.98		43.6062	17.7861	243.002
293802	82.78	1.77433	11.98		43.3652	17.7967	243.002
294003	82.98	1.77516	11.981		43.47	17.805	243.022
294203	82.96	1.77636	11.983		43.4595	17.8171	243.063
294403	83.02	1.77734	11.978		43.491	17.8269	242.961
294604	82.96	1.77836	11.977		43.4595	17.8371	242.941
294804	83.18	1.77889	11.98		43.5748	17.8424	243.002
295006	83.02	1.78054	11.98		43.491	17.859	243.002
295207	82.78	1.78123	11.982		43.3652	17.8659	243.043
295407	83.12	1.78241	11.981		43.5433	17.8777	243.022
295608	82.68	1.78326	11.98		43.3128	17.8863	243.002
295808	83.18	1.78439	11.979		43.5748	17.8976	242.982
296008	83.28	1.78505	11.981		43.6272	17.9042	243.022
296209	82.78	1.78653	11.982		43.3652	17.9191	243.043
296409	82.96	1.78716	11.98		43.4595	17.9254	243.002
296610	83.44	1.788	11.979		43.711	17.9338	242.982
296810	83.24	1.78927	11.98		43.6062	17.9465	243.002
297010	83.04	1.79014	11.98		43.5014	17.9553	243.002
297211	83.46	1.79099	11.984		43.7215	17.9638	243.083
297411	83.12	1.79221	11.978		43.5433	17.976	242.961
297611	83.42	1.793	11.979		43.7005	17.984	242.982
297812	82.98	1.79446	11.98		43.47	17.9986	243.002
298012	83.54	1.79486	11.98		43.7634	18.0026	243.002
298214	83.18	1.79629	11.981		43.5748	18.017	243.022
298415	83.5	1.79708	11.983		43.7424	18.0249	243.063
298615	83.46	1.79819	11.982		43.7215	18.036	243.043
298816	83.4	1.79901	11.982		43.69	18.0442	243.043
299016	83.28	1.80025	11.981		43.6272	18.0567	243.022
299216	83.6	1.80094	11.982		43.7948	18.0636	243.043
299417	83.6	1.80094	11.982		43.7948	18.0636	243.043
299617	83.6	1.80324	11.981		43.7948	18.0867	243.022
299818	83.16	1.80419	11.981		43.5643	18.0962	243.022
300018	83.16	1.80419	11.981		43.5643	18.0962	243.022
300218	82.96	1.80636	11.98		43.4595	18.118	243.002
300419	83.5	1.80687	11.981		43.7424	18.1231	243.022
300619	83.5	1.80838	11.981		43.7424	18.1382	243.022
300819	83.5	1.80838	11.981		43.7424	18.1382	243.022
301020	83.72	1.8098	11.98		43.8577	18.1525	243.002
301220	83.54	1.81126	11.982		43.7634	18.1671	243.043
301422	83.54	1.81126	11.982		43.7634	18.1671	243.043
301623	83.7	1.81281	11.981		43.8472	18.1826	243.022
301823	83.72	1.8143	11.98		43.8577	18.1976	243.002
302024	83.56	1.81495	11.978		43.7738	18.2041	242.961
302224	83.86	1.81615	11.981		43.931	18.2161	243.022
302424	83.4	1.81701	11.98		43.69	18.2248	243.002
302625	83.68	1.81821	11.976		43.8367	18.2368	242.921
302825	83.62	1.81903	11.978		43.8053	18.245	242.961
303026	83.68	1.82021	11.982		43.8367	18.2569	243.043
303226	83.86	1.82075	11.978		43.931	18.2623	242.961
303426	83.82	1.82216	11.98		43.9101	18.2764	243.002
303627	83.6	1.82304	11.98		43.7948	18.2853	243.002
303827	83.6	1.82304	11.98		43.7948	18.2853	243.002
304027	83.52	1.82537	11.98		43.7529	18.3086	243.002
304228	83.8	1.82587	11.98		43.8996	18.3136	243.002
304428	84	1.8271	11.979		44.0043	18.326	242.982
304630	83.7	1.82801	11.981		43.8472	18.3351	243.022
304831	84.06	1.82898	11.981		44.0358	18.3448	243.022
305031	84.24	1.82982	11.983		44.1301	18.3533	243.063
305232	84.24	1.82982	11.983		44.1301	18.3533	243.063
305432	84.06	1.83178	11.98		44.0358	18.3729	243.002
305632	84.04	1.83309	11.98		44.0253	18.3861	243.002
305833	84.18	1.83394	11.98		44.0986	18.3946	243.002
306033	84.18	1.83504	11.98		44.0986	18.4056	243.002
306234	84.2	1.83583	11.98		44.1091	18.4135	243.002
306434	83.96	1.83711	11.978		43.9834	18.4264	242.961
306634	84.3	1.8377	11.981		44.1615	18.4323	243.022
306835	83.88	1.83924	11.98		43.9415	18.4477	243.002
307035	84.2	1.83983	11.981		44.1091	18.4537	243.022
307235	84.46	1.84104	11.982		44.2453	18.4658	243.043
307436	84.46	1.84104	11.982		44.2453	18.4658	243.043
307636	84.1	1.84266	11.98		44.0567	18.482	243.002
307837	84.28	1.8441	11.982		44.151	18.4965	243.043
308037	83.76	1.84518	11.981		43.8786	18.5073	243.022
308237	83.86	1.84585	11.98		43.931	18.514	243.002
308438	84.34	1.84708	11.977		44.1825	18.5264	242.941
308638	83.76	1.84818	11.98		43.8786	18.5374	243.002
308840	84.18	1.84874	11.982		44.0986	18.543	243.043
309041	84.42	1.85015	11.984		44.2244	18.5572	243.083
309241	83.92	1.85113	11.98		43.9624	18.567	243.002
309442	84.22	1.85172	11.981		44.1196	18.5729	243.022
309642	84.6	1.85299	11.979		44.3187	18.5857	242.982
309842	84.24	1.85382	11.981		44.1301	18.594	243.022
310043	84.58	1.8547	11.981		44.3082	18.6028	243.022
310243	84.12	1.85606	11.982		44.0672	18.6164	243.043
310443	84.76	1.85693	11.979		44.4025	18.6252	242.982
310644	84.4	1.85766	11.982		44.2139	18.6325	243.043
310844	84.5	1.85903	11.981		44.2663	18.6462	243.022
311045	84.52	1.85962	11.979		44.2768	18.6522	242.982
311245	84.06	1.86128	11.979		44.0358	18.6688	242.982
311445	84.64	1.86148	11.98		44.3396	18.6708	243.002
311646	84.38	1.86307	11.979		44.2034	18.6868	242.982
311846	84.7	1.86356	11.98		44.371	18.6917	243.002
312048	84.18	1.86514	11.978		44.0986	18.7075	242.961
312249	84.64	1.86568	11.982		44.3396	18.7129	243.043
312449	84.22	1.86692	11.982		44.1196	18.7254	243.043
312650	84.44	1.86785	11.978		44.2348	18.7347	242.961
312850	84.72	1.86875	11.977		44.3815	18.7437	242.941
313050	84.42	1.86985	11.98		44.2244	18.7548	243.002
313251	84.9	1.87079	11.982		44.4758	18.7642	243.043
313451	84.38	1.87197	11.98		44.2034	18.776	243.002
313651	84.68	1.87296	11.981		44.3606	18.786	243.022
313852	84.84	1.87351	11.98		44.4444	18.7915	243.002
314052	84.84	1.87351	11.98		44.4444	18.7915	243.002
314253	84.86	1.8757	11.978		44.4549	18.8134	242.961
314453	84.74	1.87674	11.982		44.392	18.8239	243.043
314653	84.72	1.87805	11.976		44.3815	18.837	242.921
314854	84.36	1.87887	11.982		44.1929	18.8452	243.043
315054	84.36	1.87887	11.982		44.1929	18.8452	243.043
315256	84.42	1.88105	11.979		44.2244	18.8671	242.982
315457	84.98	1.88146	11.98		44.5177	18.8712	243.002
315657	84.78	1.88273	11.978		44.413	18.884	242.961
315858	84.84	1.88391	11.977		44.4444	18.8958	242.941
316058	85.04	1.88444	11.979		44.5492	18.9011	242.982
316258	84.9	1.88599	11.981		44.4758	18.9166	243.022
316459	85	1.88665	11.977		44.5282	18.9233	242.941
316659	84.7	1.88796	11.98		44.371	18.9364	243.002
316860	85	1.88845	11.98		44.5282	18.9413	243.002
317060	84.98	1.88996	11.98		44.5177	18.9565	243.002
317260	85.12	1.89061	11.98		44.5911	18.963	243.002
317461	84.8	1.89182	11.978		44.4234	18.9751	242.961
317661	85.16	1.89269	11.981		44.612	18.9839	243.022
317861	85.22	1.89367	11.98		44.6435	18.9937	243.002
318062	85.24	1.89457	11.981		44.6539	19.0027	243.022
318262	84.9	1.89569	11.984		44.4758	19.0139	243.083
318464	84.98	1.89676	11.981		44.5177	19.0247	243.022
318665	85.28	1.89765	11.983		44.6749	19.0336	243.063
318865	85.1	1.89862	11.983		44.5806	19.0433	243.063
319066	85.04	1.89974	11.982		44.5492	19.0546	243.043
319266	85.3	1.90065	11.978		44.6854	19.0637	242.961
319466	85.08	1.90162	11.981		44.5701	19.0734	243.022
319667	85.26	1.90286	11.979		44.6644	19.0859	242.982
319867	84.8	1.90372	11.981		44.4234	19.0945	243.022
320068	84.8	1.90372	11.981		44.4234	19.0945	243.022
320268	84.64	1.90598	11.977		44.3396	19.1172	242.941
320468	84.98	1.90656	11.981		44.5177	19.123	243.022
320669	85.36	1.90752	11.982		44.7168	19.1326	243.043
320869	84.92	1.90888	11.98		44.4863	19.1462	243.002
321069	85.36	1.90942	11.981		44.7168	19.1517	243.022
321270	84.94	1.91087	11.978		44.4968	19.1662	242.961
321470	85.04	1.91164	11.98		44.5492	19.1739	243.002
321672	85.5	1.91258	11.982		44.7901	19.1834	243.043
321873	85.5	1.91258	11.982		44.7901	19.1834	243.043
322073	85.44	1.9144	11.984		44.7587	19.2016	243.083
322274	85.34	1.91553	11.98		44.7063	19.2129	243.002
322474	85.16	1.91649	11.981		44.612	19.2226	243.022
322674	85.34	1.91773	11.982		44.7063	19.235	243.043
322875	85.46	1.91839	11.978		44.7692	19.2416	242.961
323075	84.92	1.91988	11.978		44.4863	19.2566	242.961
323276	85.08	1.92052	11.981		44.5701	19.263	243.022
323476	85.54	1.92136	11.978		44.8111	19.2714	242.961
323676	85.38	1.92262	11.978		44.7273	19.2841	242.961
323877	85.14	1.9238	11.98		44.6015	19.2959	243.002
324077	85.62	1.92433	11.98		44.853	19.3012	243.002
324277	85.08	1.92582	11.978		44.5701	19.3161	242.961
324478	85.46	1.92639	11.982		44.7692	19.3219	243.043
324678	85.14	1.928	11.978		44.6015	19.338	242.961
324880	85.32	1.92854	11.982		44.6958	19.3434	243.043
325081	85.56	1.92975	11.98		44.8216	19.3556	243.002
325281	85.5	1.93037	11.983		44.7901	19.3618	243.063
325482	85.18	1.93169	11.98		44.6225	19.375	243.002
325682	85.68	1.93271	11.983		44.8844	19.3853	243.063
325882	85.68	1.93271	11.983		44.8844	19.3853	243.063
326083	85.62	1.93443	11.98		44.853	19.4025	243.002
326283	84.92	1.93598	11.981		44.4863	19.4181	243.022
326484	85.28	1.93655	11.981		44.6749	19.4238	243.022
326684	85.28	1.93655	11.981		44.6749	19.4238	243.022
326884	85.12	1.93881	11.982		44.5911	19.4464	243.043
327085	85.1	1.93962	11.978		44.5806	19.4546	242.961
327285	85.56	1.94035	11.98		44.8216	19.4619	243.002
327485	85.8	1.94157	11.98		44.9473	19.4741	243.002
327686	85.3	1.94274	11.979		44.6854	19.4859	242.982
327886	85.76	1.94328	11.982		44.9263	19.4913	243.043
328087	85.46	1.94459	11.978		44.7692	19.5044	242.961
328287	85.84	1.94566	11.977		44.9683	19.5151	242.941
328487	85.8	1.94627	11.98		44.9473	19.5213	243.002
328688	85.74	1.94739	11.979		44.9159	19.5325	242.982
328888	85.72	1.9485	11.981		44.9054	19.5436	243.022
329090	85.7	1.94951	11.983		44.8949	19.5538	243.063
329291	85.66	1.95052	11.98		44.874	19.5639	243.002
329491	85.7	1.95161	11.981		44.8949	19.5748	243.022
329692	85.98	1.95221	11.978		45.0416	19.5808	242.961
329892	85.9	1.95364	11.982		44.9997	19.5952	243.043
330092	85.16	1.95489	11.98		44.612	19.6077	243.002
330293	85.3	1.95564	11.978		44.6854	19.6152	242.961
330493	86.06	1.95658	11.98		45.0835	19.6247	243.002
330693	85.94	1.95732	11.981		45.0206	19.6321	243.022
330894	85.36	1.95872	11.98		44.7168	19.6461	243.002
331094	85.34	1.95963	11.982		44.7063	19.6553	243.043
331295	85.9	1.96034	11.979		44.9997	19.6624	242.982
331495	86	1.9617	11.983		45.0521	19.676	243.063
331695	85.44	1.9627	11.98		44.7587	19.6861	243.002
331896	85.68	1.96341	11.981		44.8844	19.6932	243.022
332096	86.22	1.96412	11.98		45.1673	19.7003	243.002
332298	86	1.9657	11.982		45.0521	19.7161	243.043
332499	85.6	1.96664	11.979		44.8425	19.7256	242.982
332699	86.02	1.96719	11.978		45.0625	19.7311	242.961
332900	85.74	1.96869	11.981		44.9159	19.7461	243.022
333100	86.2	1.96923	11.982		45.1568	19.7516	243.043
333300	85.76	1.97048	11.986		44.9263	19.7641	243.124
333501	86.1	1.97156	11.979		45.1045	19.7749	242.982
333701	86.3	1.97219	11.982		45.2092	19.7812	243.043
333901	86.06	1.97378	11.979		45.0835	19.7972	242.982
334102	85.86	1.97435	11.981		44.9787	19.8029	243.022
334302	86.02	1.97569	11.98		45.0625	19.8163	243.002
334503	85.84	1.97646	11.984		44.9683	19.8241	243.083
334703	86.32	1.97739	11.979		45.2197	19.8334	242.982
334903	85.64	1.97853	11.978		44.8635	19.8448	242.961
335104	85.84	1.97936	11.98		44.9683	19.8532	243.002
335304	85.84	1.97936	11.98		44.9683	19.8532	243.002
335506	85.48	1.98158	11.978		44.7797	19.8754	242.961
335707	86.28	1.9821	11.981		45.1987	19.8806	243.022
335907	85.88	1.98374	11.979		44.9892	19.8971	242.982
336108	85.68	1.98451	11.981		44.8844	19.9048	243.022
336308	85.68	1.98451	11.981		44.8844	19.9048	243.022
336508	85.88	1.98654	11.982		44.9892	19.9252	243.043
336709	86.46	1.98714	11.98		45.293	19.9312	243.002
336909	85.98	1.98861	11.98		45.0416	19.9459	243.002
337110	86.26	1.98931	11.978		45.1883	19.953	242.961
337310	86.02	1.99069	11.98		45.0625	19.9668	243.002
337510	85.7	1.99151	11.98		44.8949	19.975	243.002
337711	86.28	1.9922	11.98		45.1987	19.9819	243.002
337911	86.24	1.99372	11.981		45.1778	19.9972	243.022
338111	85.98	1.99441	11.98		45.0416	20.0041	243.002
338312	85.82	1.99566	11.981		44.9578	20.0166	243.022
338512	86.24	1.99632	11.982		45.1778	20.0233	243.043
338714	86.22	1.99772	11.98		45.1673	20.0373	243.002
338915	86.22	1.99772	11.98		45.1673	20.0373	243.002
339115	86.32	1.99929	11.98		45.2197	20.0531	243.002
339316	86.04	2.00059	11.979		45.073	20.0661	242.982
339516	86.38	2.00127	11.979		45.2511	20.0729	242.982
339716	86.46	2.00244	11.979		45.293	20.0847	242.982
339917	86.46	2.00314	11.98		45.293	20.0917	243.002
340117	86.48	2.00423	11.979		45.3035	20.1026	242.982
340318	86.14	2.00575	11.98		45.1254	20.1179	243.002
340518	86.38	2.00627	11.982		45.2511	20.1231	243.043
340718	86.16	2.00754	11.981		45.1359	20.1358	243.022
340919	86.5	2.00812	11.982		45.314	20.1416	243.043
341119	86.34	2.00968	11.983		45.2302	20.1573	243.063
341319	86.08	2.01027	11.982		45.094	20.1632	243.043
341520	86.5	2.01152	11.981		45.314	20.1757	243.022
341720	86.22	2.01242	11.981		45.1673	20.1848	243.022
341922	86.54	2.01351	11.982		45.335	20.1957	243.043
342123	86.52	2.01432	11.982		45.3245	20.2038	243.043
342323	86.6	2.01529	11.984		45.3664	20.2135	243.083
342524	86.6	2.01529	11.984		45.3664	20.2135	243.083
342724	86.76	2.01713	11.981		45.4502	20.232	243.022
342924	86.76	2.01713	11.981		45.4502	20.232	243.022
343125	86.7	2.01926	11.979		45.4188	20.2534	242.982
343325	85.94	2.02052	11.981		45.0206	20.266	243.022
343526	86.14	2.02125	11.98		45.1254	20.2733	243.002
343726	86.14	2.02125	11.98		45.1254	20.2733	243.002
343926	86.04	2.02349	11.979		45.073	20.2958	242.982
344127	86.76	2.02403	11.98		45.4502	20.3012	243.002
344327	86.6	2.02579	11.98		45.3664	20.3189	243.002
344527	86.48	2.02623	11.98		45.3035	20.3233	243.002
344728	86.48	2.02733	11.98		45.3035	20.3343	243.002
344928	86.88	2.02839	11.982		45.5131	20.3449	243.043
345130	86.46	2.02934	11.982		45.293	20.3545	243.043
345331	86.94	2.03037	11.98		45.5445	20.3648	243.002
345531	86.1	2.03167	11.981		45.1045	20.3778	243.022
345732	86.46	2.03224	11.98		45.293	20.3836	243.002
345932	86.4	2.03346	11.984		45.2616	20.3958	243.083
346132	86.78	2.03453	11.98		45.4607	20.4065	243.002
346333	86.36	2.03537	11.982		45.2407	20.4149	243.043
346533	86.36	2.03537	11.982		45.2407	20.4149	243.043
346734	86.44	2.03735	11.977		45.2826	20.4348	242.941
346934	86.44	2.03735	11.977		45.2826	20.4348	242.941
347134	86.38	2.03957	11.98		45.2511	20.4571	243.002
347335	86.76	2.04023	11.979		45.4502	20.4637	242.982
347535	86.66	2.04157	11.98		45.3978	20.4771	243.002
347735	86.66	2.04227	11.981		45.3978	20.4842	243.022
347936	86.9	2.04339	11.982		45.5235	20.4954	243.043
348136	86.6	2.04429	11.979		45.3664	20.5044	242.982
348337	86.94	2.04507	11.981		45.5445	20.5122	243.022
348537	86.48	2.04633	11.982		45.3035	20.5249	243.043
348737	86.9	2.04698	11.979		45.5235	20.5314	242.982
348938	86.78	2.04863	11.978		45.4607	20.5479	242.961
349138	86.4	2.04936	11.978		45.2616	20.5553	242.961
349340	87	2.05025	11.98		45.5759	20.5642	243.002
349541	86.74	2.05124	11.98		45.4397	20.5741	243.002
349741	87.12	2.05211	11.979		45.6388	20.5828	242.982
349942	86.52	2.05342	11.978		45.3245	20.596	242.961
350142	86.8	2.05452	11.98		45.4712	20.607	243.002
350342	87.1	2.05492	11.984		45.6283	20.611	243.083
350543	86.52	2.05662	11.979		45.3245	20.6281	242.982
350743	86.98	2.05706	11.979		45.5655	20.6325	242.982
350943	86.98	2.05856	11.979		45.5655	20.6475	242.982
351144	86.48	2.05933	11.98		45.3035	20.6553	243.002
351344	87.02	2.06004	11.979		45.5864	20.6624	242.982
351545	87.06	2.06153	11.98		45.6074	20.6773	243.002
351745	86.36	2.06247	11.976		45.2407	20.6868	242.921
351945	86.68	2.06316	11.978		45.4083	20.6937	242.961
352146	87.18	2.06409	11.981		45.6702	20.703	243.022
352346	86.32	2.06579	11.979		45.2197	20.7201	242.982
352548	86.56	2.0664	11.98		45.3454	20.7262	243.002
352749	87.1	2.06702	11.98		45.6283	20.7324	243.002
352949	86.78	2.06833	11.98		45.4607	20.7455	243.002
353150	87.12	2.06921	11.98		45.6388	20.7544	243.002
353350	87.12	2.07001	11.979		45.6388	20.7624	242.982
353550	86.8	2.07152	11.982		45.4712	20.7775	243.043
353751	86.82	2.07221	11.983		45.4816	20.7845	243.063
353951	87.24	2.07347	11.981		45.7017	20.7971	243.022
354151	86.78	2.07463	11.979		45.4607	20.8087	242.982
354352	86.36	2.07547	11.981		45.2407	20.8172	243.022
354552	86.92	2.07618	11.979		45.534	20.8243	242.982
354753	87.32	2.07714	11.978		45.7436	20.8339	242.961
354953	87.12	2.07821	11.98		45.6388	20.8446	243.002
355153	87.1	2.07922	11.981		45.6283	20.8548	243.022
[truncated: 1,887 more rows]

## Sheet: D-2-15B
Time: 19:56:12,07/04/2019
[truncated: 3,926 more rows]
