# Supplementary material for: Physical and Mechanical Properties of Gypsum‐Like Rock Materials
Source: Hindawi journal article supplement (doi:10.1155/2020/3703706), 2020-01-01
Supplement: f1 [file 3703706.f1.zip › 3703706.f1/Saturated uniaxial compression test data.xlsx]

## Sheet: 45A-4-B
Time: 16:42:22,07/02/2019
diameter: 49.2	mm	height: 99.1	mm
Vertical 100kN force sensor (vertical force of test piece)
Control mode: displacement	Waveform: ramp
mm/s	End point: 2.5404	mm
time (ms)	vertical force (KN)	vertical deformation (mm)	transverse deformation (mm)		stress	axial strain	transverse strain
0	0	0	0		0	0	0
200	0.014	0.0015	-0.0001		0.0073639	0.0151362	-0.00203252
401	0.018	0.0023	-0.0001		0.00946787	0.0232089	-0.00203252
601	0.02	0.003	-0.0001		0.0105199	0.0302725	-0.00203252
801	0.032	0.0043	-0.0001		0.0168318	0.0433905	-0.00203252
1003	0.04	0.0056	-0.0001		0.0210397	0.0565086	-0.00203252
1204	0.042	0.0064	-0.0002		0.0220917	0.0645812	-0.00406504
1404	0.046	0.0074	-0.0002		0.0241957	0.074672	-0.00406504
1605	0.046	0.0082	-0.0001		0.0241957	0.0827447	-0.00203252
1805	0.054	0.0091	-0.0002		0.0284036	0.0918264	-0.00406504
2005	0.056	0.0103	-0.0002		0.0294556	0.103935	-0.00406504
2206	0.062	0.0113	-0.0001		0.0326116	0.114026	-0.00203252
2406	0.064	0.0124	-0.0003		0.0336635	0.125126	-0.00609756
2607	0.07	0.0134	-0.0002		0.0368195	0.135217	-0.00406504
2807	0.072	0.0146	-0.0002		0.0378715	0.147326	-0.00406504
3007	0.072	0.0154	-0.0003		0.0378715	0.155399	-0.00609756
3208	0.076	0.0162	-0.0002		0.0399755	0.163471	-0.00406504
3408	0.076	0.0173	-0.0002		0.0399755	0.174571	-0.00406504
3609	0.078	0.0182	-0.0003		0.0410274	0.183653	-0.00609756
3809	0.084	0.0192	-0.0002		0.0441834	0.193744	-0.00406504
4009	0.086	0.0202	-0.0003		0.0452354	0.203835	-0.00609756
4211	0.092	0.0213	-0.0002		0.0483914	0.214934	-0.00406504
4412	0.098	0.0224	-0.0003		0.0515473	0.226034	-0.00609756
4612	0.102	0.0236	-0.0003		0.0536513	0.238143	-0.00609756
4813	0.104	0.0244	-0.0003		0.0547033	0.246216	-0.00609756
5013	0.108	0.0251	-0.0003		0.0568072	0.25328	-0.00609756
5213	0.11	0.0264	-0.0003		0.0578592	0.266398	-0.00609756
5414	0.11	0.0275	-0.0003		0.0578592	0.277497	-0.00609756
5614	0.106	0.0282	-0.0003		0.0557553	0.284561	-0.00609756
5815	0.112	0.029	-0.0003		0.0589112	0.292634	-0.00609756
6015	0.12	0.0307	-0.0003		0.0631192	0.309788	-0.00609756
6215	0.122	0.0316	-0.0003		0.0641711	0.31887	-0.00609756
6416	0.12	0.0322	-0.0003		0.0631192	0.324924	-0.00609756
6616	0.126	0.0331	-0.0003		0.0662751	0.334006	-0.00609756
6817	0.13	0.0344	-0.0004		0.0683791	0.347124	-0.00813008
7017	0.13	0.0354	-0.0004		0.0683791	0.357215	-0.00813008
7217	0.134	0.0363	-0.0005		0.0704831	0.366297	-0.0101626
7419	0.138	0.0373	-0.0005		0.072587	0.376387	-0.0101626
7620	0.14	0.0382	-0.0004		0.073639	0.385469	-0.00813008
7820	0.144	0.0392	-0.0004		0.075743	0.39556	-0.00813008
8021	0.15	0.0402	-0.0005		0.0788989	0.405651	-0.0101626
8221	0.152	0.0411	-0.0004		0.0799509	0.414733	-0.00813008
8421	0.158	0.0423	-0.0005		0.0831069	0.426842	-0.0101626
8622	0.162	0.0435	-0.0005		0.0852109	0.438951	-0.0101626
8822	0.162	0.0445	-0.0005		0.0852109	0.449041	-0.0101626
9023	0.166	0.0455	-0.0006		0.0873148	0.459132	-0.0121951
9223	0.17	0.0464	-0.0005		0.0894188	0.468214	-0.0101626
9423	0.17	0.0474	-0.0005		0.0894188	0.478305	-0.0101626
9624	0.176	0.0483	-0.0005		0.0925748	0.487386	-0.0101626
9824	0.18	0.0494	-0.0005		0.0946787	0.498486	-0.0101626
10025	0.184	0.0504	-0.0005		0.0967827	0.508577	-0.0101626
10225	0.188	0.0516	-0.0005		0.0988867	0.520686	-0.0101626
10425	0.188	0.0524	-0.0005		0.0988867	0.528759	-0.0101626
10627	0.194	0.0533	-0.0006		0.102043	0.537841	-0.0121951
10828	0.2	0.0544	-0.0006		0.105199	0.54894	-0.0121951
11028	0.202	0.0555	-0.0005		0.106251	0.56004	-0.0101626
11229	0.204	0.0564	-0.0006		0.107303	0.569122	-0.0121951
11429	0.21	0.0573	-0.0007		0.110459	0.578204	-0.0142276
11629	0.214	0.0585	-0.0006		0.112562	0.590313	-0.0121951
11830	0.216	0.0595	-0.0005		0.113614	0.600404	-0.0101626
12030	0.218	0.0605	-0.0006		0.114666	0.610494	-0.0121951
12231	0.222	0.0614	-0.0006		0.11677	0.619576	-0.0121951
12431	0.228	0.0624	-0.0006		0.119926	0.629667	-0.0121951
12631	0.232	0.0634	-0.0006		0.12203	0.639758	-0.0121951
12832	0.232	0.0644	-0.0007		0.12203	0.649849	-0.0142276
13032	0.238	0.0654	-0.0007		0.125186	0.659939	-0.0142276
13233	0.242	0.0664	-0.0006		0.12729	0.67003	-0.0121951
13433	0.244	0.0674	-0.0007		0.128342	0.680121	-0.0142276
13633	0.246	0.0685	-0.0006		0.129394	0.691221	-0.0121951
13835	0.254	0.0695	-0.0006		0.133602	0.701312	-0.0121951
14036	0.256	0.0705	-0.0007		0.134654	0.711403	-0.0142276
14236	0.258	0.0716	-0.0006		0.135706	0.722503	-0.0121951
14437	0.262	0.0725	-0.0007		0.13781	0.731584	-0.0142276
14637	0.264	0.0734	-0.0007		0.138862	0.740666	-0.0142276
14837	0.268	0.0745	-0.0007		0.140966	0.751766	-0.0142276
15038	0.272	0.0755	-0.0008		0.14307	0.761857	-0.0162602
15238	0.274	0.0765	-0.0008		0.144122	0.771948	-0.0162602
15439	0.282	0.0776	-0.0008		0.14833	0.783047	-0.0162602
15639	0.284	0.0787	-0.0008		0.149382	0.794147	-0.0162602
15839	0.284	0.0797	-0.0009		0.149382	0.804238	-0.0182927
16040	0.29	0.0805	-0.0008		0.152538	0.812311	-0.0162602
16240	0.294	0.0814	-0.0008		0.154642	0.821393	-0.0162602
16441	0.298	0.0825	-0.0008		0.156746	0.832492	-0.0162602
16641	0.3	0.0835	-0.0008		0.157798	0.842583	-0.0162602
16841	0.296	0.0852	-0.0008		0.155694	0.859738	-0.0162602
17043	0.28	0.0855	-0.0008		0.147278	0.862765	-0.0162602
17244	0.286	0.0862	-0.0008		0.150434	0.869828	-0.0162602
17444	0.294	0.0873	-0.0008		0.154642	0.880928	-0.0162602
17645	0.3	0.0885	-0.0008		0.157798	0.893037	-0.0162602
17845	0.304	0.0897	-0.0009		0.159902	0.905146	-0.0182927
18045	0.306	0.0905	-0.0009		0.160954	0.913219	-0.0182927
18246	0.31	0.0913	-0.0009		0.163058	0.921292	-0.0182927
18446	0.314	0.0926	-0.001		0.165162	0.93441	-0.0203252
18647	0.32	0.0935	-0.0009		0.168318	0.943491	-0.0182927
18847	0.322	0.0946	-0.0009		0.16937	0.954591	-0.0182927
19047	0.324	0.0955	-0.001		0.170422	0.963673	-0.0203252
19248	0.326	0.0964	-0.0009		0.171474	0.972755	-0.0182927
19448	0.33	0.0974	-0.001		0.173578	0.982846	-0.0203252
19649	0.336	0.0985	-0.001		0.176734	0.993946	-0.0203252
19849	0.34	0.0995	-0.001		0.178838	1.00404	-0.0203252
20049	0.342	0.1005	-0.0009		0.17989	1.01413	-0.0182927
20250	0.336	0.1016	-0.001		0.176734	1.02523	-0.0203252
20450	0.338	0.1023	-0.001		0.177786	1.03229	-0.0203252
20651	0.344	0.1033	-0.0011		0.180942	1.04238	-0.0223577
20851	0.35	0.1045	-0.0011		0.184098	1.05449	-0.0223577
21051	0.356	0.1057	-0.0009		0.187253	1.0666	-0.0182927
21253	0.36	0.1068	-0.001		0.189357	1.0777	-0.0203252
21454	0.36	0.1077	-0.001		0.189357	1.08678	-0.0203252
21654	0.364	0.1085	-0.0011		0.191461	1.09485	-0.0223577
21855	0.366	0.1095	-0.001		0.192513	1.10494	-0.0203252
22055	0.372	0.1105	-0.0012		0.195669	1.11504	-0.0243902
22255	0.374	0.1115	-0.0011		0.196721	1.12513	-0.0223577
22456	0.378	0.1123	-0.0011		0.198825	1.1332	-0.0223577
22656	0.386	0.1135	-0.0012		0.203033	1.14531	-0.0243902
22857	0.392	0.1146	-0.0012		0.206189	1.15641	-0.0243902
23057	0.394	0.1157	-0.0012		0.207241	1.16751	-0.0243902
23257	0.396	0.1166	-0.0011		0.208293	1.17659	-0.0223577
23458	0.398	0.1176	-0.0011		0.209345	1.18668	-0.0223577
23658	0.402	0.1185	-0.0012		0.211449	1.19576	-0.0243902
23859	0.406	0.1196	-0.0012		0.213553	1.20686	-0.0243902
24059	0.41	0.1204	-0.0012		0.215657	1.21493	-0.0243902
24259	0.412	0.1214	-0.0013		0.216709	1.22503	-0.0264228
24461	0.416	0.1225	-0.0012		0.218813	1.23613	-0.0243902
24662	0.422	0.1235	-0.0012		0.221969	1.24622	-0.0243902
24862	0.424	0.1247	-0.0013		0.223021	1.25832	-0.0264228
25063	0.428	0.1256	-0.0013		0.225125	1.26741	-0.0264228
25263	0.434	0.1266	-0.0013		0.228281	1.2775	-0.0264228
25463	0.436	0.1276	-0.0013		0.229333	1.28759	-0.0264228
25664	0.44	0.1285	-0.0014		0.231437	1.29667	-0.0284553
25864	0.448	0.1295	-0.0013		0.235645	1.30676	-0.0264228
26065	0.448	0.1305	-0.0013		0.235645	1.31685	-0.0264228
26265	0.454	0.1315	-0.0013		0.238801	1.32694	-0.0264228
26465	0.46	0.1325	-0.0013		0.241957	1.33703	-0.0264228
26666	0.464	0.1334	-0.0013		0.244061	1.34612	-0.0264228
26866	0.468	0.1344	-0.0013		0.246165	1.35621	-0.0264228
27067	0.476	0.1354	-0.0014		0.250373	1.3663	-0.0284553
27267	0.476	0.1366	-0.0013		0.250373	1.37841	-0.0264228
27467	0.48	0.1377	-0.0014		0.252477	1.38951	-0.0284553
27669	0.48	0.1389	-0.0014		0.252477	1.40161	-0.0284553
27870	0.48	0.1396	-0.0014		0.252477	1.40868	-0.0284553
28070	0.484	0.1405	-0.0015		0.254581	1.41776	-0.0304878
28271	0.488	0.1416	-0.0014		0.256685	1.42886	-0.0284553
28471	0.494	0.1424	-0.0014		0.259841	1.43693	-0.0284553
28671	0.496	0.1436	-0.0014		0.260892	1.44904	-0.0284553
28872	0.5	0.1446	-0.0014		0.262996	1.45913	-0.0284553
29072	0.502	0.1455	-0.0014		0.264048	1.46821	-0.0284553
29273	0.508	0.1465	-0.0014		0.267204	1.4783	-0.0284553
29473	0.512	0.1475	-0.0015		0.269308	1.4884	-0.0304878
29673	0.518	0.1485	-0.0015		0.272464	1.49849	-0.0304878
29874	0.524	0.1496	-0.0015		0.27562	1.50959	-0.0304878
30074	0.526	0.1504	-0.0014		0.276672	1.51766	-0.0284553
30275	0.532	0.1514	-0.0014		0.279828	1.52775	-0.0284553
30475	0.538	0.1525	-0.0015		0.282984	1.53885	-0.0304878
30675	0.544	0.1534	-0.0015		0.28614	1.54793	-0.0304878
30877	0.548	0.1544	-0.0016		0.288244	1.55802	-0.0325203
31078	0.556	0.1555	-0.0016		0.292452	1.56912	-0.0325203
31278	0.56	0.1566	-0.0015		0.294556	1.58022	-0.0304878
31479	0.564	0.1574	-0.0016		0.29666	1.58829	-0.0325203
31679	0.566	0.1584	-0.0016		0.297712	1.59839	-0.0325203
31879	0.574	0.1594	-0.0016		0.30192	1.60848	-0.0325203
32080	0.578	0.1605	-0.0016		0.304024	1.61958	-0.0325203
32280	0.584	0.1615	-0.0016		0.30718	1.62967	-0.0325203
32481	0.588	0.1625	-0.0016		0.309284	1.63976	-0.0325203
32681	0.594	0.1636	-0.0016		0.31244	1.65086	-0.0325203
32881	0.602	0.1644	-0.0016		0.316648	1.65893	-0.0325203
33082	0.604	0.1655	-0.0016		0.3177	1.67003	-0.0325203
33282	0.612	0.1663	-0.0016		0.321908	1.6781	-0.0325203
33483	0.618	0.1675	-0.0015		0.325064	1.69021	-0.0304878
33683	0.626	0.1684	-0.0015		0.329272	1.69929	-0.0304878
33883	0.628	0.1693	-0.0015		0.330324	1.70838	-0.0304878
34085	0.636	0.1705	-0.0015		0.334532	1.72048	-0.0304878
34286	0.646	0.1715	-0.0016		0.339791	1.73058	-0.0325203
34486	0.648	0.1727	-0.0014		0.340843	1.74268	-0.0284553
34687	0.656	0.1737	-0.0015		0.345051	1.75277	-0.0304878
34887	0.658	0.1747	-0.0016		0.346103	1.76287	-0.0325203
35087	0.666	0.1757	-0.0015		0.350311	1.77296	-0.0304878
35288	0.666	0.1766	-0.0015		0.350311	1.78204	-0.0304878
35488	0.674	0.1775	-0.0016		0.354519	1.79112	-0.0325203
35689	0.678	0.1784	-0.0016		0.356623	1.8002	-0.0325203
35889	0.684	0.1793	-0.0015		0.359779	1.80928	-0.0304878
36089	0.69	0.1804	-0.0016		0.362935	1.82038	-0.0325203
36290	0.696	0.1814	-0.0015		0.366091	1.83047	-0.0304878
36490	0.704	0.1824	-0.0016		0.370299	1.84057	-0.0325203
36691	0.714	0.1835	-0.0015		0.375559	1.85166	-0.0304878
36891	0.716	0.1848	-0.0015		0.376611	1.86478	-0.0304878
37091	0.722	0.1857	-0.0016		0.379767	1.87386	-0.0325203
37293	0.724	0.1869	-0.0015		0.380819	1.88597	-0.0304878
37494	0.73	0.188	-0.0016		0.383975	1.89707	-0.0325203
37694	0.734	0.189	-0.0016		0.386079	1.90716	-0.0325203
37895	0.728	0.1897	-0.0016		0.382923	1.91423	-0.0325203
38095	0.736	0.1906	-0.0017		0.387131	1.92331	-0.0345528
38295	0.742	0.1914	-0.0016		0.390287	1.93138	-0.0325203
38496	0.75	0.1925	-0.0016		0.394495	1.94248	-0.0325203
38696	0.76	0.1936	-0.0017		0.399755	1.95358	-0.0345528
38897	0.764	0.1944	-0.0016		0.401859	1.96165	-0.0325203
39097	0.772	0.1955	-0.0016		0.406067	1.97275	-0.0325203
39297	0.784	0.1968	-0.0016		0.412378	1.98587	-0.0325203
39498	0.786	0.1976	-0.0016		0.41343	1.99395	-0.0325203
39698	0.79	0.1988	-0.0016		0.415534	2.00605	-0.0325203
39899	0.788	0.1997	-0.0016		0.414482	2.01514	-0.0325203
40099	0.792	0.2006	-0.0016		0.416586	2.02422	-0.0325203
40299	0.794	0.2015	-0.0016		0.417638	2.0333	-0.0325203
40500	0.802	0.2024	-0.0016		0.421846	2.04238	-0.0325203
40700	0.806	0.2034	-0.0016		0.42395	2.05247	-0.0325203
40901	0.818	0.2044	-0.0016		0.430262	2.06256	-0.0325203
41101	0.824	0.2056	-0.0016		0.433418	2.07467	-0.0325203
41301	0.836	0.2065	-0.0016		0.43973	2.08375	-0.0325203
41503	0.842	0.2076	-0.0016		0.442886	2.09485	-0.0325203
41704	0.85	0.2084	-0.0015		0.447094	2.10293	-0.0304878
41904	0.856	0.2096	-0.0016		0.45025	2.11504	-0.0325203
42105	0.862	0.2107	-0.0016		0.453406	2.12614	-0.0325203
42305	0.87	0.2117	-0.0015		0.457614	2.13623	-0.0304878
42505	0.876	0.2126	-0.0015		0.46077	2.14531	-0.0304878
42706	0.882	0.2137	-0.0015		0.463926	2.15641	-0.0304878
42906	0.888	0.2146	-0.0015		0.467082	2.16549	-0.0304878
43107	0.894	0.2157	-0.0015		0.470238	2.17659	-0.0304878
43307	0.902	0.2166	-0.0015		0.474446	2.18567	-0.0304878
43507	0.906	0.2176	-0.0015		0.47655	2.19576	-0.0304878
43708	0.91	0.2186	-0.0015		0.478654	2.20585	-0.0304878
43908	0.92	0.2195	-0.0015		0.483914	2.21493	-0.0304878
44109	0.934	0.2206	-0.0015		0.491277	2.22603	-0.0304878
44309	0.942	0.2219	-0.0014		0.495485	2.23915	-0.0284553
44509	0.948	0.2228	-0.0015		0.498641	2.24823	-0.0304878
44711	0.954	0.2239	-0.0014		0.501797	2.25933	-0.0284553
44912	0.958	0.225	-0.0014		0.503901	2.27043	-0.0284553
45112	0.964	0.2259	-0.0015		0.507057	2.27952	-0.0304878
45313	0.968	0.2269	-0.0014		0.509161	2.28961	-0.0284553
45513	0.976	0.2277	-0.0014		0.513369	2.29768	-0.0284553
45713	0.98	0.2288	-0.0015		0.515473	2.30878	-0.0304878
45914	0.986	0.2298	-0.0015		0.518629	2.31887	-0.0304878
46114	0.984	0.2307	-0.0015		0.517577	2.32795	-0.0304878
46315	0.998	0.2316	-0.0015		0.524941	2.33703	-0.0304878
46515	1.002	0.2327	-0.0014		0.527045	2.34813	-0.0284553
46715	1.006	0.2337	-0.0014		0.529149	2.35822	-0.0284553
46916	1.014	0.2347	-0.0014		0.533357	2.36831	-0.0284553
47116	1.018	0.2356	-0.0014		0.535461	2.3774	-0.0284553
47317	1.024	0.2367	-0.0014		0.538617	2.3885	-0.0284553
47517	1.03	0.2377	-0.0014		0.541773	2.39859	-0.0284553
47717	1.034	0.2386	-0.0014		0.543877	2.40767	-0.0284553
47919	1.042	0.2397	-0.0014		0.548085	2.41877	-0.0284553
48120	1.048	0.2408	-0.0014		0.551241	2.42987	-0.0284553
48320	1.054	0.2417	-0.0014		0.554397	2.43895	-0.0284553
48521	1.06	0.2428	-0.0013		0.557553	2.45005	-0.0264228
48721	1.066	0.2437	-0.0013		0.560708	2.45913	-0.0264228
48921	1.072	0.2448	-0.0013		0.563864	2.47023	-0.0264228
49122	1.08	0.2456	-0.0013		0.568072	2.4783	-0.0264228
49322	1.09	0.2468	-0.0013		0.573332	2.49041	-0.0264228
49523	1.09	0.2478	-0.0012		0.573332	2.5005	-0.0243902
49723	1.096	0.2488	-0.0012		0.576488	2.5106	-0.0243902
49923	1.102	0.2496	-0.0012		0.579644	2.51867	-0.0243902
50124	1.108	0.2506	-0.0012		0.5828	2.52876	-0.0243902
50324	1.116	0.2516	-0.0012		0.587008	2.53885	-0.0243902
50525	1.124	0.2526	-0.0012		0.591216	2.54894	-0.0243902
50725	1.128	0.2536	-0.0012		0.59332	2.55903	-0.0243902
50925	1.136	0.2546	-0.0012		0.597528	2.56912	-0.0243902
51127	1.144	0.2557	-0.0012		0.601736	2.58022	-0.0243902
51328	1.15	0.2565	-0.0012		0.604892	2.58829	-0.0243902
51528	1.158	0.2575	-0.0011		0.6091	2.59839	-0.0223577
51729	1.17	0.2585	-0.0012		0.615412	2.60848	-0.0243902
51929	1.184	0.2595	-0.0012		0.622776	2.61857	-0.0243902
52129	1.194	0.2608	-0.0011		0.628036	2.63169	-0.0223577
52330	1.202	0.2617	-0.0012		0.632244	2.64077	-0.0243902
52530	1.208	0.2628	-0.0012		0.635399	2.65187	-0.0243902
52731	1.214	0.2637	-0.0011		0.638555	2.66095	-0.0223577
52931	1.222	0.2648	-0.0011		0.642763	2.67205	-0.0223577
53131	1.232	0.2658	-0.0012		0.648023	2.68214	-0.0243902
53332	1.232	0.2667	-0.0012		0.648023	2.69122	-0.0243902
53532	1.242	0.2677	-0.0011		0.653283	2.70131	-0.0223577
53733	1.252	0.2685	-0.0012		0.658543	2.70938	-0.0243902
53933	1.262	0.2698	-0.0012		0.663803	2.7225	-0.0243902
54133	1.268	0.2706	-0.0011		0.666959	2.73058	-0.0223577
54335	1.274	0.2716	-0.0011		0.670115	2.74067	-0.0223577
54536	1.284	0.2727	-0.0011		0.675375	2.75177	-0.0223577
54736	1.292	0.2737	-0.0011		0.679583	2.76186	-0.0223577
54937	1.3	0.2747	-0.0011		0.683791	2.77195	-0.0223577
55137	1.308	0.2757	-0.0012		0.687999	2.78204	-0.0243902
55337	1.312	0.2766	-0.0012		0.690103	2.79112	-0.0243902
55538	1.324	0.2777	-0.0011		0.696415	2.80222	-0.0223577
55738	1.332	0.2788	-0.0011		0.700623	2.81332	-0.0223577
55939	1.34	0.2797	-0.0012		0.704831	2.8224	-0.0243902
56139	1.346	0.2807	-0.0011		0.707986	2.83249	-0.0223577
56339	1.36	0.2818	-0.0012		0.71535	2.84359	-0.0243902
56540	1.366	0.2828	-0.0011		0.718506	2.85368	-0.0223577
56740	1.376	0.2838	-0.0011		0.723766	2.86377	-0.0223577
56941	1.384	0.2848	-0.0011		0.727974	2.87386	-0.0223577
57141	1.392	0.2857	-0.001		0.732182	2.88295	-0.0203252
57341	1.402	0.2866	-0.001		0.737442	2.89203	-0.0203252
57543	1.408	0.2876	-0.001		0.740598	2.90212	-0.0203252
57744	1.42	0.2888	-0.001		0.74691	2.91423	-0.0203252
57944	1.428	0.2898	-0.001		0.751118	2.92432	-0.0203252
58145	1.438	0.2908	-0.001		0.756378	2.93441	-0.0203252
58345	1.444	0.2918	-0.001		0.759534	2.9445	-0.0203252
58545	1.452	0.2927	-0.001		0.763742	2.95358	-0.0203252
58746	1.464	0.2935	-0.001		0.770054	2.96165	-0.0203252
58946	1.474	0.2946	-0.0011		0.775314	2.97275	-0.0223577
59147	1.482	0.2955	-0.001		0.779522	2.98184	-0.0203252
59347	1.496	0.2966	-0.001		0.786885	2.99294	-0.0203252
59547	1.506	0.2977	-0.001		0.792145	3.00404	-0.0203252
59748	1.516	0.2987	-0.001		0.797405	3.01413	-0.0203252
59948	1.524	0.3	-0.0009		0.801613	3.02725	-0.0182927
60149	1.524	0.301	-0.001		0.801613	3.03734	-0.0203252
60349	1.528	0.3018	-0.001		0.803717	3.04541	-0.0203252
60549	1.536	0.3026	-0.001		0.807925	3.05348	-0.0203252
60750	1.548	0.3036	-0.001		0.814237	3.06357	-0.0203252
60950	1.552	0.3045	-0.0009		0.816341	3.07265	-0.0182927
61151	1.566	0.3056	-0.001		0.823705	3.08375	-0.0203252
61351	1.578	0.3066	-0.0011		0.830017	3.09384	-0.0223577
61551	1.586	0.3076	-0.001		0.834225	3.10394	-0.0203252
61753	1.596	0.3087	-0.001		0.839485	3.11504	-0.0203252
61954	1.602	0.3096	-0.001		0.842641	3.12412	-0.0203252
62154	1.61	0.3106	-0.001		0.846849	3.13421	-0.0203252
62355	1.624	0.3116	-0.001		0.854213	3.1443	-0.0203252
62555	1.634	0.3126	-0.0009		0.859472	3.15439	-0.0182927
62755	1.644	0.3137	-0.001		0.864732	3.16549	-0.0203252
62956	1.654	0.3146	-0.0009		0.869992	3.17457	-0.0182927
63156	1.66	0.3156	-0.001		0.873148	3.18466	-0.0203252
63357	1.67	0.3167	-0.0008		0.878408	3.19576	-0.0162602
63557	1.68	0.3177	-0.0009		0.883668	3.20585	-0.0182927
63757	1.688	0.3186	-0.0009		0.887876	3.21493	-0.0182927
63958	1.7	0.3196	-0.001		0.894188	3.22503	-0.0203252
64158	1.714	0.3206	-0.0008		0.901552	3.23512	-0.0162602
64359	1.724	0.3218	-0.0009		0.906812	3.24723	-0.0182927
64559	1.734	0.3229	-0.0009		0.912072	3.25832	-0.0182927
64759	1.74	0.324	-0.001		0.915228	3.26942	-0.0203252
64961	1.75	0.3249	-0.0009		0.920488	3.27851	-0.0182927
65162	1.756	0.3258	-0.001		0.923644	3.28759	-0.0203252
65362	1.762	0.3267	-0.001		0.9268	3.29667	-0.0203252
65563	1.774	0.3277	-0.001		0.933111	3.30676	-0.0203252
65763	1.786	0.3287	-0.0009		0.939423	3.31685	-0.0182927
65963	1.798	0.3297	-0.0008		0.945735	3.32694	-0.0162602
66164	1.806	0.3306	-0.0009		0.949943	3.33602	-0.0182927
66364	1.82	0.3317	-0.0009		0.957307	3.34712	-0.0182927
66565	1.83	0.3327	-0.0008		0.962567	3.35721	-0.0162602
66765	1.84	0.3337	-0.0009		0.967827	3.36731	-0.0182927
66965	1.85	0.3347	-0.0008		0.973087	3.3774	-0.0162602
67166	1.862	0.3356	-0.0008		0.979399	3.38648	-0.0162602
67366	1.872	0.3367	-0.0008		0.984659	3.39758	-0.0162602
67567	1.884	0.3376	-0.0008		0.990971	3.40666	-0.0162602
67767	1.896	0.3386	-0.0009		0.997283	3.41675	-0.0182927
67967	1.91	0.3398	-0.0008		1.00465	3.42886	-0.0162602
68169	1.92	0.3407	-0.0008		1.00991	3.43794	-0.0162602
68370	1.932	0.3418	-0.0009		1.01622	3.44904	-0.0182927
68570	1.944	0.3427	-0.0008		1.02253	3.45812	-0.0162602
68771	1.952	0.3437	-0.0008		1.02674	3.46821	-0.0162602
68971	1.964	0.3448	-0.0008		1.03305	3.47931	-0.0162602
69171	1.974	0.3458	-0.0008		1.03831	3.4894	-0.0162602
69372	1.986	0.3467	-0.0007		1.04462	3.49849	-0.0142276
69572	1.994	0.3477	-0.0007		1.04883	3.50858	-0.0142276
69773	2.006	0.3486	-0.0007		1.05514	3.51766	-0.0142276
69973	2.02	0.3496	-0.0008		1.06251	3.52775	-0.0162602
70173	2.03	0.3506	-0.0008		1.06777	3.53784	-0.0162602
70374	2.044	0.3516	-0.0008		1.07513	3.54793	-0.0162602
70574	2.058	0.3526	-0.0008		1.08249	3.55802	-0.0162602
70775	2.074	0.3537	-0.0008		1.09091	3.56912	-0.0162602
70975	2.09	0.3546	-0.0008		1.09933	3.5782	-0.0162602
71175	2.102	0.3558	-0.0008		1.10564	3.59031	-0.0162602
71377	2.112	0.3568	-0.0007		1.1109	3.6004	-0.0142276
71578	2.12	0.3578	-0.0008		1.11511	3.61049	-0.0162602
71778	2.134	0.3586	-0.0008		1.12247	3.61857	-0.0162602
71979	2.148	0.3597	-0.0007		1.12983	3.62967	-0.0142276
72179	2.162	0.3607	-0.0007		1.1372	3.63976	-0.0142276
72379	2.176	0.3618	-0.0007		1.14456	3.65086	-0.0142276
72580	2.188	0.3627	-0.0007		1.15087	3.65994	-0.0142276
72780	2.2	0.3637	-0.0006		1.15718	3.67003	-0.0121951
72981	2.212	0.3648	-0.0007		1.1635	3.68113	-0.0142276
73181	2.226	0.3657	-0.0007		1.17086	3.69021	-0.0142276
73381	2.236	0.3666	-0.0007		1.17612	3.69929	-0.0142276
73582	2.252	0.3678	-0.0006		1.18454	3.7114	-0.0121951
73782	2.266	0.3686	-0.0006		1.1919	3.71948	-0.0121951
73983	2.28	0.3697	-0.0007		1.19926	3.73058	-0.0142276
74183	2.294	0.3709	-0.0006		1.20663	3.74268	-0.0121951
74383	2.306	0.3719	-0.0006		1.21294	3.75277	-0.0121951
74585	2.316	0.3728	-0.0007		1.2182	3.76186	-0.0142276
74786	2.334	0.3738	-0.0005		1.22767	3.77195	-0.0101626
74986	2.348	0.3748	-0.0006		1.23503	3.78204	-0.0121951
75187	2.362	0.3758	-0.0006		1.2424	3.79213	-0.0121951
75387	2.376	0.3768	-0.0006		1.24976	3.80222	-0.0121951
75587	2.39	0.3778	-0.0006		1.25712	3.81231	-0.0121951
75788	2.4	0.3788	-0.0006		1.26238	3.8224	-0.0121951
75988	2.412	0.3798	-0.0005		1.26869	3.83249	-0.0101626
76189	2.426	0.3809	-0.0005		1.27606	3.84359	-0.0101626
76389	2.444	0.3818	-0.0006		1.28553	3.85267	-0.0121951
76589	2.456	0.3828	-0.0005		1.29184	3.86276	-0.0101626
76790	2.47	0.3838	-0.0005		1.2992	3.87286	-0.0101626
76990	2.48	0.3847	-0.0005		1.30446	3.88194	-0.0101626
77191	2.492	0.3857	-0.0005		1.31077	3.89203	-0.0101626
77391	2.51	0.3866	-0.0005		1.32024	3.90111	-0.0101626
77591	2.526	0.3876	-0.0005		1.32866	3.9112	-0.0101626
77793	2.546	0.3888	-0.0005		1.33918	3.92331	-0.0101626
77994	2.554	0.3898	-0.0005		1.34339	3.9334	-0.0101626
78194	2.564	0.3909	-0.0003		1.34865	3.9445	-0.00609756
78395	2.578	0.3919	-0.0004		1.35601	3.95459	-0.00813008
78595	2.594	0.3928	-0.0003		1.36443	3.96367	-0.00609756
78795	2.61	0.394	-0.0005		1.37284	3.97578	-0.0101626
78996	2.622	0.3948	-0.0004		1.37915	3.98385	-0.00813008
79196	2.634	0.3959	-0.0004		1.38547	3.99495	-0.00813008
79397	2.648	0.3967	-0.0004		1.39283	4.00303	-0.00813008
79597	2.66	0.3978	-0.0004		1.39914	4.01413	-0.00813008
79797	2.674	0.3988	-0.0004		1.40651	4.02422	-0.00813008
79998	2.692	0.3998	-0.0004		1.41597	4.03431	-0.00813008
80198	2.704	0.4008	-0.0004		1.42228	4.0444	-0.00813008
80399	2.716	0.4017	-0.0003		1.4286	4.05348	-0.00609756
80599	2.732	0.4028	-0.0004		1.43701	4.06458	-0.00813008
80799	2.744	0.4037	-0.0003		1.44332	4.07366	-0.00609756
81000	2.762	0.4046	-0.0004		1.45279	4.08274	-0.00813008
81200	2.776	0.4057	-0.0003		1.46016	4.09384	-0.00609756
81401	2.792	0.4068	-0.0004		1.46857	4.10494	-0.00813008
81601	2.804	0.4077	-0.0003		1.47488	4.11403	-0.00609756
81801	2.818	0.4085	-0.0003		1.48225	4.1221	-0.00609756
82003	2.834	0.4097	-0.0003		1.49066	4.13421	-0.00609756
82204	2.854	0.4106	-0.0002		1.50118	4.14329	-0.00406504
82404	2.868	0.4118	-0.0003		1.50855	4.1554	-0.00609756
82605	2.888	0.4127	-0.0002		1.51907	4.16448	-0.00406504
82805	2.906	0.4138	-0.0002		1.52854	4.17558	-0.00406504
83005	2.92	0.4148	-0.0002		1.5359	4.18567	-0.00406504
83206	2.936	0.4158	-0.0002		1.54432	4.19576	-0.00406504
83406	2.95	0.417	-0.0002		1.55168	4.20787	-0.00406504
83607	2.96	0.4179	-0.0002		1.55694	4.21695	-0.00406504
83807	2.972	0.4187	-0.0001		1.56325	4.22503	-0.00203252
84007	2.988	0.4197	-0.0001		1.57167	4.23512	-0.00203252
84208	3.008	0.4207	-0.0002		1.58219	4.24521	-0.00406504
84408	3.024	0.4217	-0.0001		1.5906	4.2553	-0.00203252
84609	3.038	0.4228	-0.0001		1.59797	4.2664	-0.00203252
84809	3.052	0.4236	-0.0001		1.60533	4.27447	-0.00203252
85009	3.07	0.4246	-0.0001		1.6148	4.28456	-0.00203252
85211	3.088	0.4257	0.0001		1.62427	4.29566	0.00203252
85412	3.106	0.4268	-0.0001		1.63373	4.30676	-0.00203252
85612	3.124	0.4277	-0.0001		1.6432	4.31584	-0.00203252
85813	3.144	0.4287	0.0001		1.65372	4.32593	0.00203252
86013	3.16	0.4297	0		1.66214	4.33602	0
86213	3.176	0.4307	0.0001		1.67055	4.34612	0.00203252
86414	3.188	0.4318	0.0001		1.67687	4.35721	0.00203252
86614	3.206	0.4327	0.0001		1.68633	4.3663	0.00203252
86815	3.222	0.4337	0.0001		1.69475	4.37639	0.00203252
87015	3.236	0.4349	0.0001		1.70211	4.3885	0.00203252
87215	3.252	0.4357	0.0001		1.71053	4.39657	0.00203252
87416	3.266	0.4368	0.0001		1.71789	4.40767	0.00203252
87616	3.286	0.4377	0.0001		1.72841	4.41675	0.00203252
87817	3.3	0.4387	0.0001		1.73578	4.42684	0.00203252
88017	3.318	0.4397	0.0002		1.74524	4.43693	0.00406504
88217	3.334	0.4407	0.0002		1.75366	4.44702	0.00406504
88419	3.35	0.4418	0.0002		1.76208	4.45812	0.00406504
88620	3.368	0.4429	0.0002		1.77154	4.46922	0.00406504
88820	3.386	0.4437	0.0002		1.78101	4.4773	0.00406504
89021	3.398	0.4449	0.0003		1.78732	4.4894	0.00609756
89221	3.416	0.4458	0.0002		1.79679	4.49849	0.00406504
89421	3.432	0.4469	0.0003		1.80521	4.50959	0.00609756
89622	3.446	0.4477	0.0002		1.81257	4.51766	0.00406504
89822	3.462	0.4487	0.0003		1.82099	4.52775	0.00609756
90023	3.48	0.4497	0.0004		1.83046	4.53784	0.00813008
90223	3.498	0.4507	0.0004		1.83992	4.54793	0.00813008
90423	3.516	0.4517	0.0005		1.84939	4.55802	0.0101626
90624	3.536	0.4527	0.0003		1.85991	4.56811	0.00609756
90824	3.55	0.4536	0.0004		1.86727	4.57719	0.00813008
91025	3.57	0.4546	0.0004		1.87779	4.58729	0.00813008
91225	3.588	0.4557	0.0005		1.88726	4.59839	0.0101626
91425	3.604	0.4568	0.0005		1.89568	4.60949	0.0101626
91627	3.622	0.4578	0.0004		1.90515	4.61958	0.00813008
91828	3.638	0.4587	0.0004		1.91356	4.62866	0.00813008
92028	3.656	0.4596	0.0005		1.92303	4.63774	0.0101626
92229	3.678	0.4607	0.0005		1.9346	4.64884	0.0101626
92429	3.694	0.4617	0.0006		1.94302	4.65893	0.0121951
92629	3.712	0.4626	0.0006		1.95249	4.66801	0.0121951
92830	3.73	0.4636	0.0006		1.96195	4.6781	0.0121951
93030	3.75	0.4646	0.0006		1.97247	4.68819	0.0121951
93231	3.77	0.4657	0.0006		1.98299	4.69929	0.0121951
93431	3.794	0.4668	0.0006		1.99562	4.71039	0.0121951
93631	3.812	0.4677	0.0007		2.00509	4.71948	0.0142276
93832	3.83	0.4688	0.0007		2.01455	4.73058	0.0142276
94032	3.85	0.4699	0.0007		2.02507	4.74168	0.0142276
94233	3.866	0.471	0.0007		2.03349	4.75277	0.0142276
94433	3.88	0.4719	0.0007		2.04085	4.76186	0.0142276
94633	3.894	0.4729	0.0007		2.04822	4.77195	0.0142276
94835	3.91	0.4739	0.0008		2.05663	4.78204	0.0162602
95036	3.926	0.4747	0.0008		2.06505	4.79011	0.0162602
95236	3.944	0.4757	0.0008		2.07452	4.8002	0.0162602
95437	3.966	0.4767	0.001		2.08609	4.81029	0.0203252
95637	3.982	0.4778	0.0009		2.0945	4.82139	0.0182927
95837	4.006	0.4787	0.0009		2.10713	4.83047	0.0182927
96038	4.022	0.4798	0.001		2.11554	4.84157	0.0203252
96238	4.04	0.4807	0.001		2.12501	4.85066	0.0203252
96439	4.058	0.4817	0.0009		2.13448	4.86075	0.0182927
96639	4.076	0.4827	0.001		2.14395	4.87084	0.0203252
96839	4.096	0.4838	0.001		2.15447	4.88194	0.0203252
97040	4.12	0.4848	0.001		2.16709	4.89203	0.0203252
97240	4.142	0.4859	0.001		2.17866	4.90313	0.0203252
97441	4.16	0.4868	0.001		2.18813	4.91221	0.0203252
97641	4.18	0.4877	0.0011		2.19865	4.92129	0.0223577
97841	4.192	0.4887	0.0011		2.20496	4.93138	0.0223577
98043	4.216	0.4897	0.0011		2.21759	4.94147	0.0223577
98244	4.234	0.4907	0.0012		2.22705	4.95156	0.0243902
98444	4.254	0.4917	0.0012		2.23757	4.96165	0.0243902
98645	4.274	0.4927	0.0012		2.24809	4.97175	0.0243902
98845	4.294	0.4937	0.0012		2.25861	4.98184	0.0243902
99045	4.314	0.4947	0.0012		2.26913	4.99193	0.0243902
99246	4.332	0.4957	0.0012		2.2786	5.00202	0.0243902
99446	4.354	0.4968	0.0013		2.29017	5.01312	0.0264228
99647	4.372	0.4978	0.0014		2.29964	5.02321	0.0284553
99847	4.396	0.4986	0.0012		2.31226	5.03128	0.0243902
100047	4.414	0.4996	0.0013		2.32173	5.04137	0.0264228
100248	4.44	0.5008	0.0014		2.33541	5.05348	0.0284553
100448	4.462	0.5016	0.0015		2.34698	5.06155	0.0304878
100649	4.49	0.5027	0.0015		2.36171	5.07265	0.0304878
100849	4.514	0.504	0.0015		2.37433	5.08577	0.0304878
101049	4.532	0.5049	0.0015		2.3838	5.09485	0.0304878
101250	4.548	0.5059	0.0015		2.39222	5.10494	0.0304878
101450	4.564	0.5069	0.0016		2.40063	5.11504	0.0325203
101651	4.582	0.508	0.0016		2.4101	5.12614	0.0325203
101851	4.602	0.509	0.0017		2.42062	5.13623	0.0345528
102051	4.616	0.5099	0.0017		2.42798	5.14531	0.0345528
102253	4.634	0.5109	0.0016		2.43745	5.1554	0.0325203
102454	4.656	0.512	0.0017		2.44902	5.1665	0.0345528
102654	4.678	0.5128	0.0017		2.46059	5.17457	0.0345528
102855	4.698	0.5139	0.0017		2.47111	5.18567	0.0345528
103055	4.716	0.5149	0.0017		2.48058	5.19576	0.0345528
103255	4.74	0.5158	0.0018		2.49321	5.20484	0.0365854
103456	4.76	0.5168	0.0018		2.50373	5.21493	0.0365854
103657	4.778	0.5178	0.0018		2.51319	5.22503	0.0365854
103857	4.798	0.5188	0.0019		2.52371	5.23512	0.0386179
104057	4.82	0.5198	0.0019		2.53529	5.24521	0.0386179
104257	4.844	0.5209	0.0019		2.54791	5.25631	0.0386179
104458	4.864	0.5218	0.0019		2.55843	5.26539	0.0386179
104658	4.886	0.5228	0.0019		2.57	5.27548	0.0386179
104859	4.898	0.524	0.0019		2.57631	5.28759	0.0386179
105059	4.914	0.5249	0.002		2.58473	5.29667	0.0406504
105259	4.93	0.5258	0.002		2.59315	5.30575	0.0406504
105461	4.952	0.5268	0.0021		2.60472	5.31584	0.0426829
105662	4.974	0.5277	0.002		2.61629	5.32492	0.0406504
105862	4.998	0.5288	0.0021		2.62891	5.33602	0.0426829
106063	5.022	0.5296	0.0022		2.64154	5.3441	0.0447154
106263	5.046	0.5306	0.0022		2.65416	5.35419	0.0447154
106463	5.062	0.5319	0.0022		2.66258	5.36731	0.0447154
106664	5.08	0.5328	0.0022		2.67204	5.37639	0.0447154
106864	5.102	0.5339	0.0023		2.68362	5.38749	0.046748
107065	5.124	0.535	0.0023		2.69519	5.39859	0.046748
107265	5.146	0.5359	0.0023		2.70676	5.40767	0.046748
107465	5.162	0.5368	0.0023		2.71518	5.41675	0.046748
107666	5.184	0.5379	0.0024		2.72675	5.42785	0.0487805
107866	5.208	0.539	0.0024		2.73937	5.43895	0.0487805
108067	5.228	0.54	0.0024		2.74989	5.44904	0.0487805
108267	5.25	0.541	0.0024		2.76146	5.45913	0.0487805
108467	5.272	0.542	0.0024		2.77303	5.46922	0.0487805
108669	5.29	0.543	0.0026		2.7825	5.47931	0.0528455
108870	5.318	0.544	0.0025		2.79723	5.4894	0.050813
109070	5.34	0.545	0.0026		2.8088	5.4995	0.0528455
109271	5.364	0.546	0.0026		2.82143	5.50959	0.0528455
109471	5.378	0.547	0.0026		2.82879	5.51968	0.0528455
109671	5.396	0.548	0.0026		2.83826	5.52977	0.0528455
109872	5.414	0.5489	0.0027		2.84773	5.53885	0.054878
110072	5.434	0.5498	0.0027		2.85825	5.54793	0.054878
110273	5.454	0.5508	0.0027		2.86877	5.55802	0.054878
110473	5.476	0.5517	0.0027		2.88034	5.5671	0.054878
110673	5.498	0.5528	0.0027		2.89191	5.5782	0.054878
110874	5.526	0.5538	0.0028		2.90664	5.58829	0.0569106
111074	5.55	0.5548	0.0028		2.91926	5.59839	0.0569106
111275	5.572	0.5559	0.0029		2.93083	5.60949	0.0589431
111475	5.594	0.5569	0.0028		2.9424	5.61958	0.0569106
111675	5.616	0.5579	0.0028		2.95398	5.62967	0.0569106
111877	5.636	0.5589	0.003		2.9645	5.63976	0.0609756
112078	5.666	0.5601	0.003		2.98028	5.65187	0.0609756
112278	5.684	0.5609	0.003		2.98974	5.65994	0.0609756
112479	5.708	0.5619	0.003		3.00237	5.67003	0.0609756
112679	5.73	0.563	0.003		3.01394	5.68113	0.0609756
112879	5.75	0.5639	0.0031		3.02446	5.69021	0.0630081
113080	5.77	0.5649	0.0031		3.03498	5.7003	0.0630081
113280	5.788	0.566	0.0032		3.04445	5.7114	0.0650407
113481	5.81	0.567	0.0032		3.05602	5.72149	0.0650407
113681	5.834	0.5679	0.0031		3.06864	5.73058	0.0630081
113881	5.854	0.5691	0.0032		3.07916	5.74268	0.0650407
114082	5.874	0.5699	0.0032		3.08968	5.75076	0.0650407
114282	5.892	0.5709	0.0033		3.09915	5.76085	0.0670732
114483	5.914	0.5719	0.0032		3.11072	5.77094	0.0650407
114683	5.936	0.5728	0.0033		3.12229	5.78002	0.0670732
114883	5.96	0.5738	0.0034		3.13492	5.79011	0.0691057
115085	5.982	0.5749	0.0034		3.14649	5.80121	0.0691057
115286	6.002	0.5758	0.0034		3.15701	5.81029	0.0691057
115486	6.028	0.5768	0.0035		3.17069	5.82038	0.0711382
115687	6.05	0.5779	0.0035		3.18226	5.83148	0.0711382
115887	6.076	0.5789	0.0035		3.19593	5.84157	0.0711382
116087	6.1	0.5798	0.0036		3.20856	5.85066	0.0731707
116288	6.124	0.581	0.0035		3.22118	5.86276	0.0711382
116488	6.148	0.5819	0.0036		3.2338	5.87185	0.0731707
116689	6.172	0.5829	0.0036		3.24643	5.88194	0.0731707
116889	6.196	0.5839	0.0037		3.25905	5.89203	0.0752033
117089	6.216	0.585	0.0037		3.26957	5.90313	0.0752033
117290	6.23	0.5859	0.0037		3.27694	5.91221	0.0752033
117490	6.252	0.5868	0.0037		3.28851	5.92129	0.0752033
117691	6.274	0.5879	0.0037		3.30008	5.93239	0.0752033
117891	6.296	0.5889	0.0039		3.31165	5.94248	0.0792683
118091	6.316	0.59	0.0038		3.32217	5.95358	0.0772358
118293	6.338	0.591	0.0038		3.33374	5.96367	0.0772358
118494	6.358	0.592	0.0039		3.34426	5.97376	0.0792683
118694	6.374	0.5929	0.0038		3.35268	5.98285	0.0772358
118895	6.396	0.5939	0.0039		3.36425	5.99294	0.0792683
119095	6.418	0.5949	0.004		3.37582	6.00303	0.0813008
119295	6.44	0.5958	0.0041		3.38739	6.01211	0.0833333
119496	6.46	0.5969	0.0041		3.39791	6.02321	0.0833333
119696	6.48	0.5978	0.0041		3.40843	6.03229	0.0833333
119897	6.5	0.5989	0.0041		3.41895	6.04339	0.0833333
120097	6.52	0.5998	0.0042		3.42947	6.05247	0.0853659
120297	6.544	0.6009	0.0043		3.4421	6.06357	0.0873984
120498	6.564	0.6019	0.0042		3.45262	6.07366	0.0853659
120698	6.588	0.6029	0.0042		3.46524	6.08375	0.0853659
120899	6.606	0.6039	0.0042		3.47471	6.09384	0.0853659
121099	6.632	0.6048	0.0043		3.48839	6.10293	0.0873984
121299	6.652	0.6058	0.0043		3.49891	6.11302	0.0873984
121500	6.68	0.6069	0.0043		3.51363	6.12412	0.0873984
121700	6.71	0.608	0.0044		3.52941	6.13522	0.0894309
121901	6.738	0.609	0.0043		3.54414	6.14531	0.0873984
122101	6.766	0.6101	0.0044		3.55887	6.15641	0.0894309
122301	6.786	0.6111	0.0045		3.56939	6.1665	0.0914634
122503	6.806	0.6122	0.0044		3.57991	6.1776	0.0894309
122704	6.828	0.6132	0.0045		3.59148	6.18769	0.0914634
122904	6.848	0.6142	0.0044		3.602	6.19778	0.0894309
123105	6.866	0.6151	0.0046		3.61147	6.20686	0.0934959
123305	6.888	0.6162	0.0046		3.62304	6.21796	0.0934959
123505	6.906	0.6171	0.0047		3.63251	6.22704	0.0955285
123706	6.928	0.6181	0.0047		3.64408	6.23713	0.0955285
123906	6.95	0.6191	0.0047		3.65565	6.24723	0.0955285
124107	6.97	0.62	0.0046		3.66617	6.25631	0.0934959
124307	6.994	0.6212	0.0047		3.67879	6.26842	0.0955285
124507	7.014	0.6221	0.0048		3.68931	6.2775	0.097561
124708	7.036	0.6232	0.0049		3.70089	6.2886	0.0995935
124908	7.054	0.6242	0.0049		3.71035	6.29869	0.0995935
125109	7.078	0.6251	0.005		3.72298	6.30777	0.101626
125309	7.098	0.6261	0.005		3.7335	6.31786	0.101626
125509	7.118	0.6271	0.005		3.74402	6.32795	0.101626
125711	7.138	0.6281	0.005		3.75454	6.33804	0.101626
125912	7.162	0.6291	0.0051		3.76716	6.34813	0.103659
126112	7.184	0.63	0.0051		3.77873	6.35721	0.103659
126313	7.208	0.6311	0.005		3.79136	6.36831	0.101626
126513	7.228	0.632	0.0051		3.80188	6.3774	0.103659
126713	7.252	0.6331	0.0051		3.8145	6.3885	0.103659
126914	7.278	0.634	0.0052		3.82818	6.39758	0.105691
127114	7.3	0.635	0.0052		3.83975	6.40767	0.105691
127315	7.32	0.6361	0.0052		3.85027	6.41877	0.105691
127515	7.346	0.637	0.0053		3.86394	6.42785	0.107724
127715	7.364	0.6382	0.0053		3.87341	6.43996	0.107724
127916	7.384	0.6391	0.0053		3.88393	6.44904	0.107724
128116	7.404	0.64	0.0054		3.89445	6.45812	0.109756
128317	7.428	0.641	0.0054		3.90708	6.46821	0.109756
128517	7.448	0.642	0.0054		3.9176	6.4783	0.109756
128717	7.474	0.6431	0.0055		3.93127	6.4894	0.111789
128919	7.496	0.6441	0.0055		3.94284	6.4995	0.111789
129120	7.524	0.645	0.0055		3.95757	6.50858	0.111789
129320	7.544	0.6461	0.0056		3.96809	6.51968	0.113821
129521	7.564	0.6471	0.0057		3.97861	6.52977	0.115854
129721	7.584	0.648	0.0056		3.98913	6.53885	0.113821
129921	7.606	0.6491	0.0057		4.0007	6.54995	0.115854
130122	7.626	0.65	0.0058		4.01122	6.55903	0.117886
130322	7.652	0.651	0.0057		4.0249	6.56912	0.115854
130523	7.676	0.652	0.0058		4.03752	6.57921	0.117886
130723	7.7	0.653	0.0058		4.05015	6.5893	0.117886
130923	7.72	0.654	0.0059		4.06067	6.59939	0.119919
131124	7.744	0.6549	0.0059		4.07329	6.60848	0.119919
131324	7.762	0.656	0.0059		4.08276	6.61958	0.119919
131525	7.788	0.6571	0.0059		4.09643	6.63068	0.119919
131725	7.81	0.658	0.006		4.108	6.63976	0.121951
131925	7.83	0.6591	0.006		4.11852	6.65086	0.121951
132127	7.85	0.6601	0.006		4.12904	6.66095	0.121951
132328	7.872	0.6609	0.0062		4.14062	6.66902	0.126016
132528	7.894	0.662	0.0061		4.15219	6.68012	0.123984
132729	7.918	0.663	0.0062		4.16481	6.69021	0.126016
132929	7.948	0.6641	0.0063		4.18059	6.70131	0.128049
133129	7.97	0.6651	0.0063		4.19216	6.7114	0.128049
133330	7.994	0.6661	0.0062		4.20479	6.72149	0.126016
133530	8.018	0.6671	0.0063		4.21741	6.73158	0.128049
133731	8.042	0.6681	0.0063		4.23004	6.74168	0.128049
133931	8.064	0.669	0.0064		4.24161	6.75076	0.130081
134131	8.084	0.6701	0.0065		4.25213	6.76186	0.132114
134332	8.106	0.6711	0.0064		4.2637	6.77195	0.130081
134532	8.134	0.6719	0.0065		4.27843	6.78002	0.132114
134733	8.172	0.673	0.0065		4.29841	6.79112	0.132114
134933	8.194	0.6741	0.0065		4.30999	6.80222	0.132114
135133	8.218	0.675	0.0066		4.32261	6.8113	0.134146
135335	8.24	0.676	0.0067		4.33418	6.82139	0.136179
135536	8.264	0.6771	0.0066		4.34681	6.83249	0.134146
135736	8.288	0.6781	0.0067		4.35943	6.84258	0.136179
135937	8.308	0.6791	0.0067		4.36995	6.85267	0.136179
136137	8.332	0.68	0.0068		4.38257	6.86176	0.138211
136337	8.354	0.6809	0.0069		4.39415	6.87084	0.140244
136538	8.38	0.682	0.0068		4.40782	6.88194	0.138211
136738	8.404	0.683	0.0068		4.42044	6.89203	0.138211
136939	8.43	0.684	0.0069		4.43412	6.90212	0.140244
137139	8.454	0.6851	0.0069		4.44674	6.91322	0.140244
137339	8.484	0.6861	0.0069		4.46252	6.92331	0.140244
137540	8.506	0.6872	0.007		4.4741	6.93441	0.142276
137740	8.528	0.6881	0.007		4.48567	6.94349	0.142276
137941	8.55	0.6891	0.007		4.49724	6.95358	0.142276
138141	8.57	0.69	0.0071		4.50776	6.96266	0.144309
138341	8.592	0.691	0.0071		4.51933	6.97275	0.144309
138543	8.618	0.692	0.0072		4.53301	6.98285	0.146341
138744	8.65	0.6931	0.0073		4.54984	6.99395	0.148374
138944	8.678	0.6941	0.0073		4.56457	7.00404	0.148374
139145	8.708	0.6951	0.0073		4.58035	7.01413	0.148374
139345	8.732	0.6961	0.0074		4.59297	7.02422	0.150407
139545	8.754	0.6969	0.0074		4.60454	7.03229	0.150407
139746	8.778	0.6979	0.0075		4.61717	7.04238	0.152439
139946	8.806	0.6991	0.0074		4.63189	7.05449	0.150407
140147	8.834	0.7001	0.0075		4.64662	7.06458	0.152439
140347	8.858	0.7011	0.0076		4.65925	7.07467	0.154472
140547	8.884	0.702	0.0077		4.67292	7.08375	0.156504
140748	8.906	0.7029	0.0078		4.68449	7.09284	0.158537
140948	8.93	0.704	0.0077		4.69712	7.10394	0.156504
141149	8.954	0.7051	0.0077		4.70974	7.11504	0.156504
141349	8.974	0.7059	0.0078		4.72026	7.12311	0.158537
141549	9	0.707	0.0078		4.73394	7.13421	0.158537
141750	9.03	0.708	0.0078		4.74972	7.1443	0.158537
141950	9.056	0.709	0.0079		4.76339	7.15439	0.160569
142151	9.086	0.7101	0.0079		4.77917	7.16549	0.160569
142351	9.106	0.711	0.0079		4.78969	7.17457	0.160569
142551	9.13	0.712	0.008		4.80232	7.18466	0.162602
142753	9.156	0.7131	0.008		4.81599	7.19576	0.162602
142954	9.18	0.7141	0.008		4.82862	7.20585	0.162602
143154	9.206	0.715	0.0082		4.84229	7.21493	0.166667
143355	9.234	0.7161	0.0082		4.85702	7.22603	0.166667
143555	9.26	0.7171	0.0082		4.87069	7.23613	0.166667
143755	9.28	0.7181	0.0083		4.88121	7.24622	0.168699
143956	9.302	0.719	0.0084		4.89279	7.2553	0.170732
144156	9.328	0.7201	0.0083		4.90646	7.2664	0.168699
144357	9.354	0.7209	0.0085		4.92014	7.27447	0.172764
144557	9.38	0.7219	0.0084		4.93381	7.28456	0.170732
144757	9.408	0.7229	0.0086		4.94854	7.29465	0.174797
144958	9.438	0.7239	0.0086		4.96432	7.30474	0.174797
145158	9.462	0.725	0.0087		4.97695	7.31584	0.176829
145359	9.488	0.7261	0.0087		4.99062	7.32694	0.176829
145559	9.51	0.7271	0.0087		5.00219	7.33703	0.176829
145759	9.532	0.7281	0.0089		5.01376	7.34712	0.180894
145961	9.558	0.7289	0.0089		5.02744	7.3552	0.180894
146162	9.58	0.73	0.0089		5.03901	7.3663	0.180894
146362	9.606	0.7309	0.009		5.05269	7.37538	0.182927
146563	9.632	0.7319	0.0091		5.06636	7.38547	0.184959
146763	9.656	0.7329	0.0092		5.07899	7.39556	0.186992
146963	9.69	0.734	0.0092		5.09687	7.40666	0.186992
147164	9.714	0.735	0.0093		5.1095	7.41675	0.189024
147364	9.744	0.7359	0.0093		5.12528	7.42583	0.189024
147565	9.772	0.7369	0.0094		5.14	7.43592	0.191057
147765	9.792	0.7379	0.0094		5.15052	7.44601	0.191057
147965	9.822	0.739	0.0095		5.1663	7.45711	0.193089
148166	9.85	0.7399	0.0095		5.18103	7.4662	0.193089
148366	9.878	0.7409	0.0096		5.19576	7.47629	0.195122
148567	9.908	0.7419	0.0097		5.21154	7.48638	0.197154
148767	9.942	0.7431	0.0097		5.22942	7.49849	0.197154
148967	9.97	0.7442	0.0098		5.24415	7.50959	0.199187
149169	9.994	0.7451	0.0098		5.25677	7.51867	0.199187
149370	10.022	0.7461	0.0099		5.2715	7.52876	0.20122
149570	10.05	0.7471	0.0099		5.28623	7.53885	0.20122
149771	10.076	0.7481	0.01		5.2999	7.54894	0.203252
149971	10.096	0.7491	0.0101		5.31042	7.55903	0.205285
150171	10.118	0.7503	0.0102		5.322	7.57114	0.207317
150372	10.13	0.7514	0.0102		5.32831	7.58224	0.207317
150572	10.146	0.7524	0.0102		5.33672	7.59233	0.207317
150773	10.168	0.7532	0.0103		5.3483	7.6004	0.20935
150973	10.184	0.7543	0.0104		5.35671	7.6115	0.211382
151173	10.2	0.755	0.0104		5.36513	7.61857	0.211382
151374	10.226	0.756	0.0104		5.3788	7.62866	0.211382
151574	10.256	0.757	0.0105		5.39458	7.63875	0.213415
151775	10.29	0.758	0.0105		5.41247	7.64884	0.213415
151975	10.322	0.7591	0.0107		5.4293	7.65994	0.21748
152175	10.35	0.7599	0.0106		5.44403	7.66801	0.215447
152377	10.378	0.761	0.0107		5.45875	7.67911	0.21748
152578	10.41	0.762	0.0109		5.47559	7.6892	0.221545
152778	10.44	0.763	0.0109		5.49137	7.69929	0.221545
152979	10.468	0.7641	0.0111		5.50609	7.71039	0.22561
153179	10.496	0.7652	0.011		5.52082	7.72149	0.223577
153379	10.524	0.7662	0.0111		5.53555	7.73158	0.22561
153580	10.548	0.767	0.0111		5.54817	7.73966	0.22561
153780	10.58	0.7681	0.0113		5.56501	7.75076	0.229675
153981	10.602	0.7692	0.0113		5.57658	7.76186	0.229675
154181	10.628	0.77	0.0114		5.59025	7.76993	0.231707
154381	10.66	0.771	0.0115		5.60708	7.78002	0.23374
154582	10.692	0.772	0.0115		5.62392	7.79011	0.23374
154782	10.72	0.7731	0.0116		5.63864	7.80121	0.235772
154983	10.752	0.774	0.0117		5.65548	7.81029	0.237805
155183	10.78	0.775	0.0118		5.6702	7.82038	0.239837
155383	10.814	0.7761	0.0118		5.68809	7.83148	0.239837
155585	10.846	0.7772	0.012		5.70492	7.84258	0.243902
155786	10.874	0.7781	0.0121		5.71965	7.85166	0.245935
155986	10.9	0.7794	0.0122		5.73332	7.86478	0.247967
156187	10.92	0.7802	0.0122		5.74384	7.87286	0.247967
156387	10.948	0.7813	0.0123		5.75857	7.88396	0.25
156587	10.972	0.7822	0.0124		5.77119	7.89304	0.252033
156788	10.996	0.7833	0.0124		5.78382	7.90414	0.252033
156988	11.02	0.7842	0.0125		5.79644	7.91322	0.254065
157189	11.046	0.7852	0.0126		5.81012	7.92331	0.256098
157389	11.07	0.7861	0.0127		5.82274	7.93239	0.25813
157589	11.094	0.7871	0.0127		5.83537	7.94248	0.25813
157790	11.122	0.7881	0.0127		5.85009	7.95257	0.25813
157990	11.148	0.7891	0.0129		5.86377	7.96266	0.262195
158191	11.18	0.7901	0.0129		5.8806	7.97275	0.262195
158391	11.21	0.791	0.013		5.89638	7.98184	0.264228
158591	11.234	0.7921	0.0131		5.909	7.99294	0.26626
158793	11.264	0.793	0.0131		5.92478	8.00202	0.26626
158994	11.294	0.794	0.0132		5.94056	8.01211	0.268293
159194	11.326	0.7949	0.0133		5.9574	8.02119	0.270325
159395	11.364	0.7961	0.0134		5.97738	8.0333	0.272358
159595	11.396	0.7971	0.0135		5.99422	8.04339	0.27439
159795	11.428	0.7981	0.0136		6.01105	8.05348	0.276423
159996	11.458	0.7991	0.0137		6.02683	8.06357	0.278455
160196	11.488	0.8002	0.0137		6.04261	8.07467	0.278455
160397	11.518	0.8012	0.0138		6.05839	8.08476	0.280488
160597	11.54	0.8022	0.014		6.06996	8.09485	0.284553
160797	11.568	0.8032	0.014		6.08469	8.10494	0.284553
160998	11.598	0.8042	0.014		6.10047	8.11504	0.284553
161198	11.622	0.8051	0.0141		6.11309	8.12412	0.286585
161399	11.646	0.8061	0.0142		6.12571	8.13421	0.288618
161599	11.674	0.8072	0.0143		6.14044	8.14531	0.29065
161799	11.704	0.8081	0.0144		6.15622	8.15439	0.292683
162000	11.732	0.809	0.0144		6.17095	8.16347	0.292683
162200	11.766	0.81	0.0145		6.18883	8.17356	0.294715
162401	11.796	0.8111	0.0146		6.20461	8.18466	0.296748
162601	11.826	0.812	0.0148		6.22039	8.19374	0.300813
162801	11.856	0.813	0.0147		6.23617	8.20383	0.29878
163003	11.89	0.8139	0.0148		6.25406	8.21292	0.300813
163204	11.918	0.815	0.015		6.26878	8.22402	0.304878
163404	11.944	0.816	0.015		6.28246	8.23411	0.304878
163605	11.978	0.817	0.0151		6.30034	8.2442	0.306911
163805	12.004	0.818	0.0151		6.31402	8.25429	0.306911
164005	12.032	0.819	0.0152		6.32875	8.26438	0.308943
164206	12.06	0.82	0.0153		6.34347	8.27447	0.310976
164406	12.096	0.8209	0.0153		6.36241	8.28355	0.310976
164607	12.128	0.822	0.0154		6.37924	8.29465	0.313008
164807	12.16	0.823	0.0155		6.39607	8.30474	0.315041
165007	12.192	0.824	0.0156		6.41291	8.31483	0.317073
165208	12.22	0.8251	0.0157		6.42763	8.32593	0.319106
165408	12.25	0.8261	0.0157		6.44341	8.33602	0.319106
165609	12.278	0.827	0.0159		6.45814	8.34511	0.323171
165809	12.304	0.828	0.0159		6.47182	8.3552	0.323171
166009	12.332	0.829	0.0159		6.48654	8.36529	0.323171
166211	12.362	0.83	0.016		6.50232	8.37538	0.325203
166412	12.39	0.831	0.0161		6.51705	8.38547	0.327236
166612	12.424	0.832	0.0162		6.53494	8.39556	0.329268
166813	12.452	0.8331	0.0162		6.54966	8.40666	0.329268
167013	12.48	0.834	0.0163		6.56439	8.41574	0.331301
167213	12.516	0.835	0.0164		6.58333	8.42583	0.333333
167414	12.548	0.8359	0.0164		6.60016	8.43491	0.333333
167614	12.584	0.8369	0.0165		6.6191	8.44501	0.335366
167815	12.61	0.838	0.0165		6.63277	8.4561	0.335366
168015	12.644	0.8389	0.0167		6.65065	8.46519	0.339431
168215	12.678	0.84	0.0167		6.66854	8.47629	0.339431
168416	12.71	0.841	0.0167		6.68537	8.48638	0.339431
168616	12.742	0.8419	0.0168		6.7022	8.49546	0.341463
168817	12.766	0.843	0.0168		6.71483	8.50656	0.341463
169017	12.798	0.844	0.0168		6.73166	8.51665	0.341463
169217	12.824	0.8452	0.0169		6.74533	8.52876	0.343496
169419	12.846	0.8463	0.0171		6.75691	8.53986	0.347561
169620	12.87	0.8472	0.0171		6.76953	8.54894	0.347561
169820	12.894	0.8482	0.0171		6.78215	8.55903	0.347561
170021	12.916	0.8491	0.0171		6.79372	8.56811	0.347561
170221	12.938	0.8501	0.0173		6.8053	8.5782	0.351626
170421	12.97	0.8511	0.0173		6.82213	8.58829	0.351626
170622	13	0.852	0.0174		6.83791	8.59738	0.353659
170822	13.03	0.853	0.0175		6.85369	8.60747	0.355691
171023	13.07	0.8542	0.0175		6.87473	8.61958	0.355691
171223	13.108	0.8551	0.0175		6.89472	8.62866	0.355691
171423	13.14	0.856	0.0176		6.91155	8.63774	0.357724
171624	13.172	0.8571	0.0177		6.92838	8.64884	0.359756
171824	13.206	0.8581	0.0177		6.94626	8.65893	0.359756
172025	13.242	0.859	0.0178		6.9652	8.66801	0.361789
172225	13.278	0.8603	0.0178		6.98413	8.68113	0.361789
172425	13.304	0.8612	0.0179		6.99781	8.69021	0.363821
172627	13.34	0.8621	0.018		7.01675	8.69929	0.365854
172828	13.364	0.8631	0.0181		7.02937	8.70938	0.367886
173028	13.394	0.8641	0.018		7.04515	8.71948	0.365854
173229	13.428	0.8649	0.0182		7.06303	8.72755	0.369919
173429	13.462	0.866	0.0182		7.08092	8.73865	0.369919
173629	13.496	0.8671	0.0183		7.0988	8.74975	0.371951
173830	13.528	0.868	0.0183		7.11563	8.75883	0.371951
174030	13.56	0.869	0.0184		7.13246	8.76892	0.373984
174231	13.596	0.8701	0.0185		7.1514	8.78002	0.376016
174431	13.626	0.8711	0.0185		7.16718	8.79011	0.376016
174631	13.67	0.8721	0.0185		7.19032	8.8002	0.376016
174832	13.706	0.8731	0.0186		7.20926	8.81029	0.378049
175032	13.738	0.8741	0.0186		7.22609	8.82038	0.378049
175233	13.78	0.875	0.0187		7.24818	8.82947	0.380081
175433	13.814	0.876	0.0188		7.26607	8.83956	0.382114
175633	13.848	0.877	0.0188		7.28395	8.84965	0.382114
175835	13.888	0.8782	0.019		7.30499	8.86176	0.386179
176036	13.926	0.8793	0.019		7.32498	8.87286	0.386179
176236	13.954	0.8803	0.019		7.33971	8.88295	0.386179
176437	13.982	0.8813	0.0191		7.35443	8.89304	0.388211
176637	14.018	0.8822	0.0192		7.37337	8.90212	0.390244
176837	14.048	0.8833	0.0192		7.38915	8.91322	0.390244
177038	14.076	0.8842	0.0193		7.40388	8.9223	0.392276
177238	14.114	0.8852	0.0193		7.42386	8.93239	0.392276
177439	14.148	0.8862	0.0194		7.44175	8.94248	0.394309
177639	14.184	0.8872	0.0194		7.46068	8.95257	0.394309
177839	14.214	0.8882	0.0195		7.47646	8.96266	0.396341
178040	14.248	0.8893	0.0196		7.49435	8.97376	0.398374
178240	14.284	0.8902	0.0196		7.51328	8.98285	0.398374
178441	14.318	0.891	0.0196		7.53117	8.99092	0.398374
178641	14.35	0.8921	0.0197		7.548	9.00202	0.400407
178841	14.392	0.8929	0.0197		7.57009	9.01009	0.400407
179043	14.434	0.8941	0.0199		7.59218	9.0222	0.404472
179244	14.468	0.8951	0.0199		7.61007	9.03229	0.404472
179444	14.5	0.8961	0.02		7.6269	9.04238	0.406504
179645	14.542	0.8971	0.0201		7.64899	9.05247	0.408537
179845	14.574	0.8981	0.0201		7.66582	9.06256	0.408537
180045	14.612	0.8992	0.0202		7.68581	9.07366	0.410569
180246	14.65	0.9001	0.0202		7.7058	9.08274	0.410569
180446	14.684	0.9012	0.0202		7.72368	9.09384	0.410569
180647	14.726	0.9022	0.0203		7.74577	9.10394	0.412602
180847	14.76	0.9031	0.0204		7.76366	9.11302	0.414634
181047	14.796	0.9042	0.0205		7.78259	9.12412	0.416667
181248	14.836	0.9052	0.0206		7.80363	9.13421	0.418699
181448	14.876	0.9062	0.0206		7.82467	9.1443	0.418699
181649	14.908	0.9073	0.0207		7.8415	9.1554	0.420732
181849	14.948	0.9083	0.0208		7.86254	9.16549	0.422764
182049	14.978	0.9093	0.0208		7.87832	9.17558	0.422764
182250	15.01	0.9101	0.0209		7.89515	9.18365	0.424797
182450	15.058	0.9112	0.021		7.9204	9.19475	0.426829
182651	15.092	0.9122	0.021		7.93829	9.20484	0.426829
182851	15.128	0.9132	0.0211		7.95722	9.21493	0.428862
183051	15.168	0.9142	0.0212		7.97826	9.22503	0.430894
183253	15.202	0.9151	0.0212		7.99614	9.23411	0.430894
183454	15.236	0.9164	0.0213		8.01403	9.24723	0.432927
183654	15.266	0.9172	0.0213		8.02981	9.2553	0.432927
183855	15.3	0.9182	0.0215		8.04769	9.26539	0.436992
184055	15.334	0.9192	0.0215		8.06558	9.27548	0.436992
184255	15.368	0.9201	0.0217		8.08346	9.28456	0.441057
184456	15.406	0.9212	0.0218		8.10345	9.29566	0.443089
184656	15.44	0.9221	0.0217		8.12133	9.30474	0.441057
184857	15.476	0.9231	0.0218		8.14027	9.31483	0.443089
185057	15.516	0.924	0.0218		8.16131	9.32392	0.443089
185257	15.556	0.9251	0.022		8.18235	9.33502	0.447154
185458	15.598	0.9261	0.0221		8.20444	9.34511	0.449187
185658	15.642	0.9269	0.0222		8.22758	9.35318	0.45122
185859	15.682	0.9282	0.0222		8.24862	9.3663	0.45122
186059	15.722	0.9292	0.0223		8.26966	9.37639	0.453252
186259	15.756	0.9302	0.0225		8.28754	9.38648	0.457317
186461	15.794	0.9312	0.0225		8.30753	9.39657	0.457317
186662	15.832	0.9322	0.0225		8.32752	9.40666	0.457317
186862	15.864	0.9333	0.0226		8.34435	9.41776	0.45935
187063	15.902	0.9343	0.0227		8.36434	9.42785	0.461382
187263	15.936	0.9352	0.0228		8.38222	9.43693	0.463415
187463	15.97	0.9362	0.0228		8.40011	9.44702	0.463415
187664	16.004	0.937	0.0229		8.41799	9.4551	0.465447
187864	16.038	0.9383	0.0229		8.43587	9.46821	0.465447
188065	16.076	0.9392	0.023		8.45586	9.4773	0.46748
188265	16.108	0.9401	0.0231		8.47269	9.48638	0.469512
188465	16.142	0.941	0.0232		8.49058	9.49546	0.471545
188666	16.184	0.9421	0.0233		8.51267	9.50656	0.473577
188866	16.224	0.9431	0.0234		8.53371	9.51665	0.47561
189067	16.262	0.944	0.0235		8.5537	9.52573	0.477642
189267	16.306	0.9451	0.0235		8.57684	9.53683	0.477642
189467	16.352	0.9461	0.0236		8.60104	9.54692	0.479675
189669	16.396	0.9472	0.0237		8.62418	9.55802	0.481707
189870	16.44	0.9482	0.0239		8.64732	9.56811	0.485772
190070	16.48	0.9493	0.0239		8.66836	9.57921	0.485772
190271	16.514	0.9502	0.0239		8.68625	9.58829	0.485772
190471	16.55	0.9513	0.024		8.70518	9.59939	0.487805
190671	16.588	0.9523	0.0241		8.72517	9.60949	0.489837
190872	16.622	0.9533	0.0243		8.74305	9.61958	0.493902
191072	16.654	0.9543	0.0244		8.75989	9.62967	0.495935
191273	16.694	0.9552	0.0245		8.78093	9.63875	0.497967
191473	16.73	0.9563	0.0245		8.79986	9.64985	0.497967
191673	16.766	0.9571	0.0246		8.8188	9.65792	0.5
191874	16.802	0.9582	0.0247		8.83773	9.66902	0.502033
192074	16.84	0.9591	0.0247		8.85772	9.6781	0.502033
192275	16.876	0.9601	0.0249		8.87666	9.68819	0.506098
192475	16.914	0.961	0.0249		8.89664	9.69728	0.506098
192675	16.958	0.9621	0.025		8.91979	9.70838	0.50813
192877	17.002	0.9631	0.0251		8.94293	9.71847	0.510163
193078	17.044	0.964	0.0251		8.96502	9.72755	0.510163
193278	17.09	0.9652	0.0251		8.98922	9.73966	0.510163
193479	17.13	0.9663	0.0254		9.01026	9.75076	0.51626
193679	17.176	0.9673	0.0254		9.03445	9.76085	0.51626
193879	17.214	0.9682	0.0255		9.05444	9.76993	0.518293
194080	17.252	0.9693	0.0255		9.07443	9.78103	0.518293
194280	17.288	0.9703	0.0255		9.09337	9.79112	0.518293
194481	17.324	0.9714	0.0257		9.1123	9.80222	0.522358
194681	17.358	0.9723	0.0258		9.13019	9.8113	0.52439
194881	17.4	0.9733	0.0258		9.15228	9.82139	0.52439
195082	17.438	0.9743	0.0261		9.17226	9.83148	0.530488
195282	17.476	0.9752	0.026		9.19225	9.84057	0.528455
195483	17.516	0.9761	0.0262		9.21329	9.84965	0.53252
195683	17.556	0.9771	0.0263		9.23433	9.85974	0.534553
195883	17.592	0.9782	0.0262		9.25327	9.87084	0.53252
196085	17.634	0.9792	0.0263		9.27536	9.88093	0.534553
196286	17.674	0.9802	0.0265		9.2964	9.89102	0.538618
196486	17.716	0.9812	0.0265		9.31849	9.90111	0.538618
196687	17.752	0.9821	0.0266		9.33743	9.91019	0.54065
196887	17.788	0.9832	0.0267		9.35636	9.92129	0.542683
197087	17.83	0.9841	0.0268		9.37845	9.93037	0.544715
197288	17.864	0.9852	0.0269		9.39634	9.94147	0.546748
197488	17.906	0.9862	0.0269		9.41843	9.95156	0.546748
197689	17.95	0.9871	0.0271		9.44157	9.96065	0.550813
197889	17.986	0.9881	0.0271		9.46051	9.97074	0.550813
198089	18.028	0.9891	0.0272		9.4826	9.98083	0.552846
198290	18.07	0.9902	0.0274		9.50469	9.99193	0.556911
198490	18.108	0.991	0.0274		9.52468	10	0.556911
198691	18.162	0.9921	0.0275		9.55308	10.0111	0.558943
198891	18.212	0.9931	0.0275		9.57938	10.0212	0.558943
199091	18.256	0.9942	0.0277		9.60253	10.0323	0.563008
199293	18.3	0.9953	0.0278		9.62567	10.0434	0.565041
199494	18.338	0.9964	0.028		9.64566	10.0545	0.569106
199694	18.38	0.9973	0.0279		9.66775	10.0636	0.567073
199895	18.418	0.9983	0.0281		9.68774	10.0737	0.571138
200095	18.456	0.9993	0.0282		9.70773	10.0838	0.573171
200295	18.496	1.0002	0.0283		9.72877	10.0928	0.575203
200496	18.54	1.0013	0.0283		9.75191	10.1039	0.575203
200696	18.572	1.0023	0.0285		9.76874	10.114	0.579268
200897	18.612	1.0032	0.0285		9.78978	10.1231	0.579268
201097	18.652	1.0041	0.0286		9.81082	10.1322	0.581301
201297	18.692	1.0052	0.0287		9.83186	10.1433	0.583333
201498	18.736	1.0061	0.0288		9.855	10.1524	0.585366
201698	18.778	1.0072	0.029		9.8771	10.1635	0.589431
201899	18.82	1.0081	0.0289		9.89919	10.1726	0.587398
202099	18.862	1.0092	0.0291		9.92128	10.1837	0.591463
202299	18.902	1.0101	0.0292		9.94232	10.1927	0.593496
202500	18.946	1.0112	0.0293		9.96546	10.2038	0.595528
202700	18.984	1.0121	0.0294		9.98545	10.2129	0.597561
202901	19.026	1.0131	0.0296		10.0075	10.223	0.601626
203101	19.08	1.0142	0.0297		10.0359	10.2341	0.603659
203301	19.124	1.0152	0.0297		10.0591	10.2442	0.603659
203503	19.17	1.0163	0.0299		10.0833	10.2553	0.607724
203704	19.208	1.0173	0.0299		10.1033	10.2654	0.607724
203904	19.254	1.0184	0.03		10.1275	10.2765	0.609756
204105	19.296	1.0193	0.0302		10.1496	10.2856	0.613821
204305	19.34	1.0204	0.0303		10.1727	10.2967	0.615854
204505	19.38	1.0212	0.0305		10.1937	10.3047	0.619919
204706	19.416	1.0223	0.0305		10.2127	10.3158	0.619919
204906	19.464	1.0232	0.0305		10.2379	10.3249	0.619919
205107	19.506	1.0243	0.0307		10.26	10.336	0.623984
205307	19.548	1.0252	0.0308		10.2821	10.3451	0.626016
205507	19.592	1.0263	0.0309		10.3053	10.3562	0.628049
205708	19.632	1.0272	0.031		10.3263	10.3653	0.630081
205908	19.68	1.0283	0.0311		10.3515	10.3764	0.632114
206109	19.72	1.0291	0.0313		10.3726	10.3845	0.636179
206309	19.76	1.0303	0.0314		10.3936	10.3966	0.638211
206509	19.804	1.0313	0.0315		10.4168	10.4067	0.640244
206711	19.848	1.0323	0.0316		10.4399	10.4168	0.642276
206912	19.896	1.0333	0.0317		10.4652	10.4268	0.644309
207112	19.932	1.0343	0.0319		10.4841	10.4369	0.648374
207313	19.978	1.0353	0.0319		10.5083	10.447	0.648374
207513	20.02	1.0362	0.0322		10.5304	10.4561	0.654472
207713	20.062	1.0372	0.0322		10.5525	10.4662	0.654472
207914	20.112	1.0381	0.0324		10.5788	10.4753	0.658537
208114	20.154	1.0392	0.0324		10.6009	10.4864	0.658537
208315	20.198	1.0402	0.0325		10.624	10.4965	0.660569
208515	20.24	1.0412	0.0327		10.6461	10.5066	0.664634
208715	20.282	1.0422	0.0328		10.6682	10.5166	0.666667
208916	20.324	1.0432	0.033		10.6903	10.5267	0.670732
209116	20.368	1.0442	0.0332		10.7134	10.5368	0.674797
209317	20.406	1.0452	0.0332		10.7334	10.5469	0.674797
209517	20.452	1.0462	0.0333		10.7576	10.557	0.676829
209717	20.488	1.0472	0.0334		10.7765	10.5671	0.678862
209919	20.532	1.0482	0.0336		10.7997	10.5772	0.682927
210120	20.58	1.0494	0.0337		10.8249	10.5893	0.684959
210320	20.634	1.0502	0.0338		10.8533	10.5974	0.686992
210521	20.682	1.0512	0.034		10.8786	10.6075	0.691057
210721	20.726	1.0522	0.0341		10.9017	10.6176	0.693089
210921	20.774	1.0533	0.0342		10.927	10.6287	0.695122
211122	20.82	1.0543	0.0344		10.9512	10.6387	0.699187
211322	20.862	1.0553	0.0345		10.9733	10.6488	0.70122
211523	20.902	1.0563	0.0346		10.9943	10.6589	0.703252
211723	20.942	1.0573	0.0348		11.0153	10.669	0.707317
211923	20.986	1.0582	0.035		11.0385	10.6781	0.711382
212124	21.034	1.0592	0.035		11.0637	10.6882	0.711382
212324	21.072	1.0603	0.0352		11.0837	10.6993	0.715447
212525	21.116	1.0611	0.0353		11.1069	10.7074	0.71748
212725	21.158	1.0623	0.0355		11.129	10.7195	0.721545
212925	21.194	1.0632	0.0355		11.1479	10.7286	0.721545
213127	21.236	1.0643	0.0358		11.17	10.7397	0.727642
213328	21.282	1.0651	0.0359		11.1942	10.7477	0.729675
213528	21.326	1.0662	0.0359		11.2173	10.7588	0.729675
213729	21.376	1.0671	0.0361		11.2436	10.7679	0.73374
213929	21.422	1.0682	0.0363		11.2678	10.779	0.737805
214129	21.464	1.0691	0.0365		11.2899	10.7881	0.74187
214330	21.504	1.0702	0.0367		11.311	10.7992	0.745935
214530	21.548	1.0712	0.0369		11.3341	10.8093	0.75
214731	21.59	1.0723	0.037		11.3562	10.8204	0.752033
214931	21.636	1.0733	0.0371		11.3804	10.8305	0.754065
215131	21.674	1.0744	0.0373		11.4004	10.8416	0.75813
215332	21.718	1.0752	0.0374		11.4235	10.8496	0.760163
215532	21.76	1.0763	0.0376		11.4456	10.8607	0.764228
215733	21.802	1.0773	0.0378		11.4677	10.8708	0.768293
215933	21.848	1.0782	0.0378		11.4919	10.8799	0.768293
216133	21.894	1.0792	0.0379		11.5161	10.89	0.770325
216335	21.94	1.0803	0.0381		11.5403	10.9011	0.77439
216536	21.986	1.0813	0.0383		11.5645	10.9112	0.778455
216736	22.03	1.0823	0.0384		11.5876	10.9213	0.780488
216937	22.074	1.0832	0.0386		11.6108	10.9304	0.784553
217137	22.122	1.0842	0.0387		11.636	10.9405	0.786585
217337	22.168	1.0854	0.0389		11.6602	10.9526	0.79065
217538	22.208	1.0863	0.039		11.6813	10.9617	0.792683
217738	22.254	1.0873	0.0391		11.7054	10.9717	0.794715
217939	22.298	1.0881	0.0393		11.7286	10.9798	0.79878
218139	22.352	1.0892	0.0395		11.757	10.9909	0.802846
218339	22.394	1.0903	0.0396		11.7791	11.002	0.804878
218540	22.444	1.0913	0.0397		11.8054	11.0121	0.806911
218740	22.488	1.0924	0.0399		11.8285	11.0232	0.810976
218941	22.536	1.0933	0.04		11.8538	11.0323	0.813008
219141	22.58	1.0942	0.0402		11.8769	11.0414	0.817073
219341	22.628	1.0952	0.0403		11.9022	11.0515	0.819106
219543	22.674	1.0961	0.0404		11.9264	11.0605	0.821138
219744	22.72	1.0973	0.0406		11.9506	11.0727	0.825203
219944	22.764	1.0983	0.0409		11.9737	11.0827	0.831301
220145	22.81	1.0992	0.041		11.9979	11.0918	0.833333
220345	22.856	1.1003	0.0411		12.0221	11.1029	0.835366
220545	22.896	1.1011	0.0412		12.0431	11.111	0.837398
220746	22.944	1.1022	0.0414		12.0684	11.1221	0.841463
220946	22.982	1.1034	0.0416		12.0884	11.1342	0.845528
221147	23.02	1.1041	0.0417		12.1084	11.1413	0.847561
221347	23.062	1.1052	0.042		12.1304	11.1524	0.853659
221547	23.106	1.1061	0.0421		12.1536	11.1615	0.855691
221748	23.15	1.107	0.0422		12.1767	11.1705	0.857724
221948	23.202	1.1081	0.0424		12.2041	11.1816	0.861789
222149	23.258	1.1092	0.0425		12.2335	11.1927	0.863821
222349	23.314	1.1102	0.0427		12.263	11.2028	0.867886
222549	23.36	1.1112	0.0429		12.2872	11.2129	0.871951
222750	23.416	1.1123	0.043		12.3167	11.224	0.873984
222950	23.464	1.1134	0.0433		12.3419	11.2351	0.880081
223151	23.51	1.1143	0.0433		12.3661	11.2442	0.880081
223351	23.554	1.1153	0.0435		12.3892	11.2543	0.884146
223551	23.6	1.1164	0.0437		12.4134	11.2654	0.888211
223753	23.65	1.1174	0.0438		12.4397	11.2755	0.890244
223954	23.698	1.1184	0.044		12.465	11.2856	0.894309
224154	23.754	1.1193	0.0442		12.4944	11.2947	0.898374
224355	23.806	1.1205	0.0443		12.5218	11.3068	0.900407
224555	23.854	1.1215	0.0446		12.547	11.3169	0.906504
224755	23.898	1.1225	0.0447		12.5702	11.3269	0.908537
224956	23.948	1.1235	0.0448		12.5965	11.337	0.910569
225156	23.984	1.1245	0.045		12.6154	11.3471	0.914634
225357	24.03	1.1255	0.0451		12.6396	11.3572	0.916667
225557	24.072	1.1265	0.0454		12.6617	11.3673	0.922764
225757	24.12	1.1275	0.0455		12.6869	11.3774	0.924797
225958	24.172	1.1287	0.0457		12.7143	11.3895	0.928862
226158	24.212	1.1296	0.0459		12.7353	11.3986	0.932927
226359	24.258	1.1305	0.046		12.7595	11.4077	0.934959
226559	24.298	1.1315	0.0461		12.7806	11.4178	0.936992
226759	24.336	1.1325	0.0463		12.8006	11.4279	0.941057
226961	24.38	1.1333	0.0465		12.8237	11.4359	0.945122
227162	24.424	1.1344	0.0466		12.8469	11.447	0.947154
227362	24.468	1.1354	0.0469		12.87	11.4571	0.953252
227563	24.52	1.1364	0.047		12.8973	11.4672	0.955285
227763	24.568	1.1374	0.0472		12.9226	11.4773	0.95935
227963	24.616	1.1384	0.0473		12.9478	11.4874	0.961382
228164	24.66	1.1393	0.0475		12.971	11.4965	0.965447
228364	24.706	1.1403	0.0477		12.9952	11.5066	0.969512
228565	24.75	1.1413	0.0478		13.0183	11.5166	0.971545
228765	24.796	1.1423	0.0481		13.0425	11.5267	0.977642
228965	24.838	1.1433	0.0482		13.0646	11.5368	0.979675
229166	24.884	1.1443	0.0484		13.0888	11.5469	0.98374
229366	24.938	1.1452	0.0486		13.1172	11.556	0.987805
229567	24.992	1.1463	0.0487		13.1456	11.5671	0.989837
229767	25.036	1.1472	0.0489		13.1688	11.5762	0.993902
229967	25.09	1.1482	0.0491		13.1972	11.5863	0.997967
230169	25.154	1.1494	0.0492		13.2308	11.5984	1
230370	25.212	1.1505	0.0494		13.2613	11.6095	1.00407
230570	25.266	1.1516	0.0497		13.2897	11.6206	1.01016
230771	25.308	1.1525	0.0498		13.3118	11.6297	1.0122
230971	25.352	1.1536	0.0499		13.335	11.6408	1.01423
231171	25.392	1.1545	0.05		13.356	11.6498	1.01626
231372	25.436	1.1555	0.0503		13.3792	11.6599	1.02236
231572	25.478	1.1564	0.0505		13.4012	11.669	1.02642
231773	25.52	1.1575	0.0506		13.4233	11.6801	1.02846
231973	25.562	1.1584	0.0508		13.4454	11.6892	1.03252
232173	25.604	1.1594	0.051		13.4675	11.6993	1.03659
232374	25.652	1.1603	0.0511		13.4928	11.7084	1.03862
232574	25.704	1.1614	0.0513		13.5201	11.7195	1.04268
232775	25.754	1.1623	0.0515		13.5464	11.7286	1.04675
232975	25.802	1.1633	0.0517		13.5717	11.7386	1.05081
233175	25.85	1.1644	0.0518		13.5969	11.7497	1.05285
233377	25.894	1.1654	0.052		13.6201	11.7598	1.05691
233578	25.944	1.1663	0.0522		13.6464	11.7689	1.06098
233778	25.99	1.1673	0.0524		13.6706	11.779	1.06504
233979	26.038	1.1685	0.0525		13.6958	11.7911	1.06707
234179	26.086	1.1695	0.0527		13.7211	11.8012	1.07114
234379	26.13	1.1704	0.053		13.7442	11.8103	1.07724
234580	26.176	1.1714	0.0531		13.7684	11.8204	1.07927
234780	26.22	1.1724	0.0533		13.7915	11.8305	1.08333
234981	26.27	1.1734	0.0535		13.8178	11.8406	1.0874
235181	26.316	1.1743	0.0537		13.842	11.8496	1.09146
235381	26.368	1.1754	0.0538		13.8694	11.8607	1.0935
235582	26.412	1.1763	0.054		13.8925	11.8698	1.09756
235782	26.464	1.1773	0.0542		13.9199	11.8799	1.10163
235983	26.512	1.1784	0.0544		13.9451	11.891	1.10569
236183	26.56	1.1794	0.0545		13.9704	11.9011	1.10772
236383	26.602	1.1804	0.0547		13.9925	11.9112	1.11179
236585	26.646	1.1814	0.0549		14.0156	11.9213	1.11585
236786	26.694	1.1824	0.0552		14.0409	11.9314	1.12195
236986	26.738	1.1832	0.0553		14.064	11.9395	1.12398
237187	26.782	1.1842	0.0555		14.0871	11.9495	1.12805
237387	26.826	1.1854	0.0557		14.1103	11.9617	1.13211
237587	26.868	1.1862	0.0558		14.1324	11.9697	1.13415
237788	26.918	1.1873	0.0561		14.1587	11.9808	1.14024
237988	26.966	1.1881	0.0562		14.1839	11.9889	1.14228
238189	27.018	1.1893	0.0564		14.2113	12.001	1.14634
238389	27.062	1.1902	0.0567		14.2344	12.0101	1.15244
238589	27.106	1.1913	0.0568		14.2576	12.0212	1.15447
238790	27.162	1.1923	0.057		14.287	12.0313	1.15854
238990	27.208	1.1933	0.0572		14.3112	12.0414	1.1626
239191	27.256	1.1943	0.0573		14.3365	12.0515	1.16463
239391	27.304	1.1953	0.0576		14.3617	12.0616	1.17073
239591	27.344	1.1964	0.0578		14.3828	12.0727	1.1748
239793	27.392	1.1974	0.058		14.408	12.0827	1.17886
239994	27.436	1.1984	0.0583		14.4311	12.0928	1.18496
240194	27.476	1.1994	0.0583		14.4522	12.1029	1.18496
240395	27.512	1.2002	0.0585		14.4711	12.111	1.18902
240595	27.57	1.2012	0.0587		14.5016	12.1211	1.19309
240795	27.62	1.2023	0.0591		14.5279	12.1322	1.20122
240996	27.668	1.2032	0.0592		14.5532	12.1413	1.20325
241196	27.716	1.2043	0.0593		14.5784	12.1524	1.20528
241397	27.766	1.2053	0.0596		14.6047	12.1625	1.21138
241597	27.81	1.2061	0.0598		14.6279	12.1705	1.21545
241797	27.862	1.2073	0.06		14.6552	12.1826	1.21951
241998	27.906	1.2083	0.0602		14.6784	12.1927	1.22358
242198	27.96	1.2093	0.0604		14.7068	12.2028	1.22764
242399	28.006	1.2104	0.0606		14.731	12.2139	1.23171
242599	28.05	1.2114	0.0609		14.7541	12.224	1.2378
242799	28.092	1.2123	0.061		14.7762	12.2331	1.23984
243000	28.138	1.2132	0.0613		14.8004	12.2422	1.24593
243200	28.188	1.2143	0.0615		14.8267	12.2533	1.25
243401	28.238	1.2152	0.0617		14.853	12.2624	1.25407
243601	28.29	1.2164	0.0619		14.8803	12.2745	1.25813
243801	28.336	1.2173	0.0621		14.9045	12.2836	1.2622
244003	28.382	1.2183	0.0623		14.9287	12.2936	1.26626
244204	28.432	1.2194	0.0626		14.955	12.3047	1.27236
244404	28.474	1.2204	0.0626		14.9771	12.3148	1.27236
244605	28.516	1.2214	0.0629		14.9992	12.3249	1.27846
244805	28.564	1.2224	0.0631		15.0245	12.335	1.28252
245005	28.612	1.2234	0.0634		15.0497	12.3451	1.28862
245206	28.658	1.2245	0.0636		15.0739	12.3562	1.29268
245406	28.706	1.2254	0.0638		15.0992	12.3653	1.29675
245607	28.746	1.2266	0.064		15.1202	12.3774	1.30081
245807	28.79	1.2274	0.0642		15.1433	12.3855	1.30488
246007	28.838	1.2283	0.0645		15.1686	12.3946	1.31098
246208	28.882	1.2295	0.0647		15.1917	12.4067	1.31504
246408	28.93	1.2305	0.0649		15.217	12.4168	1.31911
246609	28.974	1.2315	0.065		15.2401	12.4268	1.32114
246809	29.026	1.2323	0.0653		15.2675	12.4349	1.32724
247009	29.064	1.2334	0.0654		15.2875	12.446	1.32927
247211	29.104	1.2343	0.0657		15.3085	12.4551	1.33537
247412	29.148	1.2355	0.066		15.3316	12.4672	1.34146
247612	29.192	1.2365	0.0662		15.3548	12.4773	1.34553
247813	29.236	1.2375	0.0664		15.3779	12.4874	1.34959
248013	29.278	1.2385	0.0665		15.4	12.4975	1.35163
248213	29.322	1.2395	0.0668		15.4232	12.5076	1.35772
248414	29.364	1.2405	0.067		15.4453	12.5177	1.36179
248614	29.412	1.2414	0.0672		15.4705	12.5267	1.36585
248815	29.452	1.2424	0.0674		15.4915	12.5368	1.36992
249015	29.498	1.2434	0.0676		15.5157	12.5469	1.37398
249215	29.54	1.2443	0.0679		15.5378	12.556	1.38008
249416	29.584	1.2454	0.0681		15.561	12.5671	1.38415
249616	29.628	1.2464	0.0683		15.5841	12.5772	1.38821
249817	29.674	1.2474	0.0685		15.6083	12.5873	1.39228
250017	29.718	1.2484	0.0687		15.6315	12.5974	1.39634
250217	29.76	1.2494	0.0688		15.6535	12.6075	1.39837
250419	29.802	1.2503	0.069		15.6756	12.6165	1.40244
250620	29.854	1.2514	0.0693		15.703	12.6276	1.40854
250820	29.898	1.2524	0.0695		15.7261	12.6377	1.4126
251021	29.942	1.2534	0.0698		15.7493	12.6478	1.4187
251221	29.984	1.2545	0.0699		15.7714	12.6589	1.42073
251421	30.026	1.2554	0.0701		15.7935	12.668	1.4248
251622	30.074	1.2564	0.0703		15.8187	12.6781	1.42886
251822	30.122	1.2575	0.0705		15.844	12.6892	1.43293
252023	30.168	1.2584	0.0707		15.8682	12.6983	1.43699
252223	30.21	1.2594	0.071		15.8902	12.7084	1.44309
252423	30.26	1.2605	0.0712		15.9165	12.7195	1.44715
252624	30.304	1.2615	0.0714		15.9397	12.7296	1.45122
252824	30.346	1.2625	0.0717		15.9618	12.7397	1.45732
253025	30.38	1.2637	0.0719		15.9797	12.7518	1.46138
253225	30.418	1.2648	0.072		15.9997	12.7629	1.46341
253425	30.454	1.2655	0.0723		16.0186	12.7699	1.46951
253627	30.49	1.2666	0.0725		16.0375	12.781	1.47358
253828	30.534	1.2676	0.0728		16.0607	12.7911	1.47967
254028	30.568	1.2686	0.0729		16.0786	12.8012	1.48171
254229	30.61	1.2695	0.0731		16.1006	12.8103	1.48577
254429	30.658	1.2704	0.0734		16.1259	12.8194	1.49187
254629	30.702	1.2715	0.0737		16.149	12.8305	1.49797
254830	30.746	1.2724	0.0738		16.1722	12.8396	1.5
255030	30.786	1.2734	0.0742		16.1932	12.8496	1.50813
255231	30.826	1.2745	0.0744		16.2143	12.8607	1.5122
255431	30.87	1.2754	0.0746		16.2374	12.8698	1.51626
255631	30.912	1.2765	0.075		16.2595	12.8809	1.52439
255832	30.954	1.2776	0.0752		16.2816	12.892	1.52846
256032	30.994	1.2785	0.0754		16.3026	12.9011	1.53252
256233	31.032	1.2796	0.0757		16.3226	12.9122	1.53862
256433	31.074	1.2806	0.0759		16.3447	12.9223	1.54268
256633	31.116	1.2816	0.0762		16.3668	12.9324	1.54878
256835	31.154	1.2825	0.0765		16.3868	12.9415	1.55488
257036	31.198	1.2835	0.0767		16.4099	12.9516	1.55894
257236	31.238	1.2846	0.0769		16.431	12.9627	1.56301
257437	31.276	1.2855	0.0771		16.451	12.9717	1.56707
257637	31.318	1.2865	0.0774		16.473	12.9818	1.57317
257837	31.354	1.2876	0.0776		16.492	12.9929	1.57724
258038	31.39	1.2884	0.0778		16.5109	13.001	1.5813
258238	31.428	1.2896	0.0782		16.5309	13.0131	1.58943
258439	31.468	1.2904	0.0782		16.5519	13.0212	1.58943
258639	31.504	1.2915	0.0784		16.5709	13.0323	1.5935
258839	31.542	1.2925	0.0787		16.5909	13.0424	1.59959
259040	31.584	1.2935	0.0789		16.613	13.0525	1.60366
259240	31.628	1.2945	0.0791		16.6361	13.0626	1.60772
259441	31.666	1.2954	0.0794		16.6561	13.0716	1.61382
259641	31.71	1.2964	0.0796		16.6792	13.0817	1.61789
259841	31.75	1.2974	0.0798		16.7003	13.0918	1.62195
260043	31.792	1.2984	0.08		16.7224	13.1019	1.62602
260244	31.832	1.2995	0.0804		16.7434	13.113	1.63415
260444	31.874	1.3003	0.0805		16.7655	13.1211	1.63618
260645	31.906	1.3013	0.0807		16.7823	13.1312	1.64024
260845	31.954	1.3023	0.081		16.8076	13.1413	1.64634
261045	32.002	1.3034	0.0812		16.8328	13.1524	1.65041
261246	32.042	1.3045	0.0815		16.8539	13.1635	1.6565
261446	32.08	1.3055	0.0817		16.8739	13.1736	1.66057
261647	32.124	1.3064	0.082		16.897	13.1826	1.66667
261847	32.168	1.3076	0.0823		16.9201	13.1948	1.67276
262047	32.208	1.3087	0.0824		16.9412	13.2059	1.6748
262248	32.242	1.3095	0.0828		16.9591	13.2139	1.68293
262448	32.284	1.3106	0.083		16.9812	13.225	1.68699
262649	32.32	1.3115	0.0832		17.0001	13.2341	1.69106
262849	32.36	1.3126	0.0834		17.0211	13.2452	1.69512
263049	32.39	1.3136	0.0837		17.0369	13.2553	1.70122
263250	32.426	1.3145	0.0841		17.0558	13.2644	1.70935
263450	32.464	1.3156	0.0842		17.0758	13.2755	1.71138
263651	32.498	1.3165	0.0845		17.0937	13.2846	1.71748
263851	32.536	1.3174	0.0846		17.1137	13.2936	1.71951
264051	32.574	1.3184	0.085		17.1337	13.3037	1.72764
264253	32.61	1.3194	0.0852		17.1526	13.3138	1.73171
264454	32.65	1.3205	0.0855		17.1737	13.3249	1.7378
264654	32.692	1.3215	0.0857		17.1958	13.335	1.74187
264855	32.738	1.3224	0.0859		17.22	13.3441	1.74593
265055	32.776	1.3236	0.0861		17.2399	13.3562	1.75
265255	32.812	1.3246	0.0864		17.2589	13.3663	1.7561
265456	32.844	1.3257	0.0866		17.2757	13.3774	1.76016
265656	32.876	1.3266	0.0868		17.2925	13.3865	1.76423
265857	32.908	1.3276	0.087		17.3094	13.3966	1.76829
266057	32.946	1.3287	0.0872		17.3294	13.4077	1.77236
266257	32.98	1.3295	0.0874		17.3472	13.4157	1.77642
266458	33.014	1.3306	0.0878		17.3651	13.4268	1.78455
266658	33.05	1.3317	0.0879		17.3841	13.4379	1.78659
266859	33.084	1.3326	0.0881		17.402	13.447	1.79065
267059	33.116	1.3336	0.0883		17.4188	13.4571	1.79472
267259	33.156	1.3345	0.0885		17.4398	13.4662	1.79878
267461	33.196	1.3355	0.0887		17.4609	13.4763	1.80285
267662	33.23	1.3365	0.0889		17.4787	13.4864	1.80691
267862	33.264	1.3375	0.0891		17.4966	13.4965	1.81098
268063	33.298	1.3386	0.0894		17.5145	13.5076	1.81707
268263	33.352	1.3398	0.0895		17.5429	13.5197	1.81911
268463	33.404	1.3408	0.0899		17.5703	13.5298	1.82724
268664	33.44	1.3419	0.09		17.5892	13.5409	1.82927
268864	33.472	1.3429	0.0904		17.606	13.551	1.8374
269065	33.496	1.3438	0.0905		17.6187	13.56	1.83943
269265	33.53	1.3447	0.0908		17.6365	13.5691	1.84553
269465	33.57	1.3458	0.0911		17.6576	13.5802	1.85163
269666	33.598	1.3467	0.0913		17.6723	13.5893	1.85569
269866	33.63	1.3477	0.0915		17.6891	13.5994	1.85976
270067	33.67	1.3487	0.0916		17.7102	13.6095	1.86179
270267	33.7	1.3497	0.092		17.726	13.6196	1.86992
270467	33.736	1.3508	0.0922		17.7449	13.6307	1.87398
270669	33.774	1.3517	0.0925		17.7649	13.6398	1.88008
270870	33.81	1.3528	0.0927		17.7838	13.6509	1.88415
271070	33.844	1.3538	0.093		17.8017	13.6609	1.89024
271271	33.878	1.3547	0.0933		17.8196	13.67	1.89634
271471	33.906	1.3557	0.0935		17.8343	13.6801	1.90041
271671	33.94	1.3566	0.0938		17.8522	13.6892	1.9065
271872	33.974	1.3577	0.094		17.8701	13.7003	1.91057
272072	34.006	1.3588	0.0943		17.8869	13.7114	1.91667
272273	34.038	1.3597	0.0945		17.9037	13.7205	1.92073
272473	34.07	1.3608	0.0947		17.9206	13.7316	1.9248
272673	34.102	1.3617	0.0949		17.9374	13.7407	1.92886
272874	34.134	1.3628	0.0952		17.9542	13.7518	1.93496
273074	34.172	1.3637	0.0955		17.9742	13.7608	1.94106
273275	34.204	1.3648	0.0957		17.9911	13.7719	1.94512
273475	34.232	1.3659	0.096		18.0058	13.783	1.95122
273675	34.264	1.3668	0.0962		18.0226	13.7921	1.95528
273877	34.288	1.3678	0.0965		18.0352	13.8022	1.96138
274078	34.32	1.3688	0.0968		18.0521	13.8123	1.96748
274278	34.35	1.3697	0.0969		18.0679	13.8214	1.96951
274479	34.39	1.3707	0.0971		18.0889	13.8315	1.97358
274679	34.426	1.3716	0.0974		18.1078	13.8406	1.97967
274879	34.46	1.3726	0.0976		18.1257	13.8507	1.98374
275080	34.494	1.3737	0.0979		18.1436	13.8618	1.98984
275280	34.524	1.3746	0.0981		18.1594	13.8708	1.9939
275481	34.554	1.3756	0.0983		18.1752	13.8809	1.99797
275681	34.58	1.3767	0.0985		18.1888	13.892	2.00203
275881	34.612	1.3777	0.0988		18.2057	13.9021	2.00813
276082	34.64	1.3787	0.0991		18.2204	13.9122	2.01423
276282	34.676	1.3797	0.0993		18.2393	13.9223	2.01829
276483	34.708	1.3807	0.0996		18.2562	13.9324	2.02439
276683	34.75	1.3816	0.0998		18.2783	13.9415	2.02846
276883	34.78	1.3827	0.1001		18.294	13.9526	2.03455
277085	34.812	1.3837	0.1003		18.3109	13.9627	2.03862
277286	34.846	1.3846	0.1006		18.3287	13.9717	2.04472
277486	34.876	1.3857	0.1007		18.3445	13.9828	2.04675
277687	34.908	1.3867	0.101		18.3614	13.9929	2.05285
277887	34.936	1.3877	0.1013		18.3761	14.003	2.05894
278087	34.962	1.3887	0.1014		18.3898	14.0131	2.06098
278288	35	1.3895	0.1018		18.4098	14.0212	2.06911
278488	35.034	1.3907	0.1019		18.4276	14.0333	2.07114
278689	35.066	1.3917	0.1022		18.4445	14.0434	2.07724
278889	35.096	1.3927	0.1024		18.4602	14.0535	2.0813
279089	35.132	1.3938	0.1027		18.4792	14.0646	2.0874
279290	35.158	1.3946	0.1029		18.4929	14.0727	2.09146
279490	35.192	1.3957	0.1032		18.5107	14.0838	2.09756
279691	35.222	1.3967	0.1034		18.5265	14.0938	2.10163
279891	35.244	1.3978	0.1036		18.5381	14.1049	2.10569
280091	35.266	1.3987	0.104		18.5497	14.114	2.11382
280293	35.3	1.3997	0.1042		18.5676	14.1241	2.11789
280494	35.326	1.4007	0.1045		18.5812	14.1342	2.12398
280694	35.356	1.4016	0.1047		18.597	14.1433	2.12805
280895	35.388	1.4026	0.105		18.6138	14.1534	2.13415
281095	35.418	1.4037	0.1053		18.6296	14.1645	2.14024
281295	35.444	1.4047	0.1054		18.6433	14.1746	2.14228
281496	35.474	1.4057	0.1058		18.6591	14.1847	2.15041
281696	35.502	1.4066	0.106		18.6738	14.1937	2.15447
281897	35.54	1.4077	0.1062		18.6938	14.2048	2.15854
282097	35.576	1.4087	0.1065		18.7127	14.2149	2.16463
282297	35.614	1.4098	0.1068		18.7327	14.226	2.17073
282498	35.64	1.4107	0.107		18.7464	14.2351	2.1748
282698	35.678	1.4117	0.1073		18.7664	14.2452	2.18089
282899	35.706	1.4128	0.1076		18.7811	14.2563	2.18699
283099	35.734	1.4138	0.1079		18.7958	14.2664	2.19309
283299	35.762	1.4147	0.1081		18.8106	14.2755	2.19715
283500	35.792	1.4158	0.1083		18.8263	14.2866	2.20122
283700	35.816	1.4167	0.1087		18.839	14.2957	2.20935
283901	35.842	1.4176	0.1088		18.8526	14.3047	2.21138
284101	35.87	1.4187	0.1091		18.8674	14.3158	2.21748
284301	35.896	1.4197	0.1094		18.881	14.3259	2.22358
284503	35.934	1.4208	0.1097		18.901	14.337	2.22967
284704	35.96	1.4217	0.1099		18.9147	14.3461	2.23374
284904	35.986	1.4227	0.1102		18.9284	14.3562	2.23984
285105	36.012	1.4237	0.1105		18.9421	14.3663	2.24593
285305	36.04	1.4246	0.1107		18.9568	14.3754	2.25
285505	36.078	1.4257	0.1111		18.9768	14.3865	2.25813
285706	36.11	1.4268	0.1112		18.9936	14.3976	2.26016
285906	36.136	1.4278	0.1115		19.0073	14.4077	2.26626
286107	36.162	1.4288	0.1118		19.021	14.4178	2.27236
286307	36.188	1.4297	0.112		19.0346	14.4268	2.27642
286507	36.214	1.4308	0.1123		19.0483	14.4379	2.28252
286708	36.242	1.4318	0.1125		19.063	14.448	2.28659
286908	36.274	1.4327	0.1128		19.0799	14.4571	2.29268
287109	36.304	1.4337	0.1131		19.0956	14.4672	2.29878
287309	36.332	1.4347	0.1134		19.1104	14.4773	2.30488
287509	36.362	1.4357	0.1137		19.1262	14.4874	2.31098
287711	36.392	1.4368	0.1139		19.1419	14.4985	2.31504
287912	36.422	1.4377	0.1143		19.1577	14.5076	2.32317
288112	36.45	1.4388	0.1145		19.1724	14.5187	2.32724
288313	36.48	1.4397	0.1148		19.1882	14.5277	2.33333
288513	36.502	1.4407	0.115		19.1998	14.5378	2.3374
288713	36.534	1.4418	0.1153		19.2166	14.5489	2.3435
288914	36.56	1.4427	0.1157		19.2303	14.558	2.35163
289114	36.594	1.4438	0.116		19.2482	14.5691	2.35772
289315	36.618	1.4448	0.1162		19.2608	14.5792	2.36179
289515	36.646	1.4458	0.1164		19.2755	14.5893	2.36585
289715	36.672	1.4468	0.1167		19.2892	14.5994	2.37195
289916	36.698	1.4478	0.117		19.3029	14.6095	2.37805
290116	36.72	1.4488	0.1172		19.3145	14.6196	2.38211
290317	36.748	1.4497	0.1175		19.3292	14.6287	2.38821
290517	36.772	1.4507	0.1178		19.3418	14.6387	2.39431
290717	36.8	1.4518	0.1181		19.3565	14.6498	2.40041
290919	36.826	1.4528	0.1183		19.3702	14.6599	2.40447
291120	36.846	1.4537	0.1186		19.3807	14.669	2.41057
291320	36.87	1.4547	0.1188		19.3934	14.6791	2.41463
291521	36.904	1.4556	0.1191		19.4112	14.6882	2.42073
291721	36.932	1.4566	0.1194		19.426	14.6983	2.42683
291921	36.966	1.4577	0.1197		19.4439	14.7094	2.43293
292122	36.994	1.4586	0.1199		19.4586	14.7185	2.43699
292322	37.022	1.4597	0.1203		19.4733	14.7296	2.44512
292523	37.05	1.4607	0.1205		19.488	14.7397	2.44919
292723	37.076	1.4617	0.1208		19.5017	14.7497	2.45528
292923	37.104	1.4627	0.1211		19.5164	14.7598	2.46138
293124	37.128	1.4637	0.1213		19.5291	14.7699	2.46545
293324	37.148	1.4648	0.1215		19.5396	14.781	2.46951
293525	37.176	1.4658	0.1219		19.5543	14.7911	2.47764
293725	37.2	1.4668	0.1221		19.5669	14.8012	2.48171
293925	37.226	1.4677	0.1224		19.5806	14.8103	2.4878
294127	37.256	1.4688	0.1227		19.5964	14.8214	2.4939
294328	37.278	1.4698	0.123		19.608	14.8315	2.5
294528	37.304	1.4707	0.1232		19.6216	14.8406	2.50407
294729	37.332	1.4718	0.1235		19.6364	14.8517	2.51016
294929	37.36	1.4727	0.1238		19.6511	14.8607	2.51626
295129	37.39	1.4739	0.1241		19.6669	14.8729	2.52236
295330	37.42	1.4749	0.1244		19.6827	14.8829	2.52846
295530	37.44	1.4758	0.1247		19.6932	14.892	2.53455
295731	37.466	1.4768	0.1249		19.7069	14.9021	2.53862
295931	37.496	1.4779	0.1252		19.7226	14.9132	2.54472
296131	37.526	1.4788	0.1255		19.7384	14.9223	2.55081
296332	37.55	1.4798	0.1257		19.751	14.9324	2.55488
296532	37.576	1.4808	0.126		19.7647	14.9425	2.56098
296733	37.602	1.4818	0.1264		19.7784	14.9526	2.56911
296933	37.622	1.4828	0.1266		19.7889	14.9627	2.57317
297133	37.648	1.4837	0.127		19.8026	14.9717	2.5813
297335	37.676	1.4848	0.1273		19.8173	14.9828	2.5874
297536	37.698	1.4857	0.1276		19.8289	14.9919	2.5935
297736	37.726	1.4868	0.1279		19.8436	15.003	2.59959
297937	37.754	1.4878	0.1281		19.8583	15.0131	2.60366
298137	37.774	1.4889	0.1283		19.8689	15.0242	2.60772
298337	37.798	1.4898	0.1286		19.8815	15.0333	2.61382
298538	37.818	1.4907	0.1289		19.892	15.0424	2.61992
298738	37.844	1.4918	0.1292		19.9057	15.0535	2.62602
298939	37.866	1.4928	0.1295		19.9172	15.0636	2.63211
299139	37.888	1.4939	0.1298		19.9288	15.0747	2.63821
299339	37.908	1.4948	0.1301		19.9393	15.0838	2.64431
299540	37.932	1.4958	0.1303		19.952	15.0938	2.64837
299740	37.962	1.4968	0.1306		19.9677	15.1039	2.65447
299941	37.986	1.4979	0.131		19.9804	15.115	2.6626
300141	38.016	1.4987	0.1313		19.9961	15.1231	2.6687
300341	38.044	1.4998	0.1315		20.0109	15.1342	2.67276
300543	38.066	1.5009	0.1317		20.0224	15.1453	2.67683
300744	38.09	1.5018	0.132		20.0351	15.1544	2.68293
300944	38.112	1.5029	0.1324		20.0466	15.1655	2.69106
301145	38.134	1.5038	0.1327		20.0582	15.1746	2.69715
301345	38.166	1.5049	0.133		20.075	15.1857	2.70325
301545	38.186	1.5058	0.1333		20.0856	15.1948	2.70935
301746	38.208	1.5067	0.1336		20.0971	15.2038	2.71545
301946	38.234	1.5077	0.1339		20.1108	15.2139	2.72154
302147	38.258	1.5087	0.1341		20.1234	15.224	2.72561
302347	38.284	1.5097	0.1344		20.1371	15.2341	2.73171
302547	38.31	1.5108	0.1347		20.1508	15.2452	2.7378
302748	38.332	1.5118	0.135		20.1624	15.2553	2.7439
302948	38.356	1.5128	0.1353		20.175	15.2654	2.75
303149	38.38	1.5138	0.1356		20.1876	15.2755	2.7561
303349	38.402	1.5148	0.1359		20.1992	15.2856	2.7622
303549	38.422	1.5158	0.1362		20.2097	15.2957	2.76829
303750	38.444	1.5168	0.1365		20.2213	15.3058	2.77439
303950	38.464	1.5177	0.1368		20.2318	15.3148	2.78049
304151	38.488	1.5187	0.1371		20.2444	15.3249	2.78659
304351	38.512	1.5197	0.1374		20.257	15.335	2.79268
304551	38.536	1.5208	0.1377		20.2697	15.3461	2.79878
304753	38.556	1.5218	0.138		20.2802	15.3562	2.80488
304954	38.58	1.5228	0.1383		20.2928	15.3663	2.81098
305154	38.608	1.5238	0.1386		20.3075	15.3764	2.81707
305355	38.632	1.5248	0.1388		20.3202	15.3865	2.82114
305555	38.648	1.5257	0.1391		20.3286	15.3956	2.82724
305755	38.674	1.5269	0.1395		20.3423	15.4077	2.83537
305956	38.696	1.5278	0.1398		20.3538	15.4168	2.84146
306156	38.716	1.5289	0.1401		20.3643	15.4279	2.84756
306357	38.732	1.5298	0.1405		20.3728	15.4369	2.85569
306557	38.75	1.5307	0.1407		20.3822	15.446	2.85976
306757	38.772	1.5318	0.141		20.3938	15.4571	2.86585
306958	38.796	1.5328	0.1414		20.4064	15.4672	2.87398
307158	38.816	1.5338	0.1417		20.4169	15.4773	2.88008
307359	38.836	1.5348	0.142		20.4275	15.4874	2.88618
307559	38.854	1.5358	0.1423		20.4369	15.4975	2.89228
307759	38.878	1.5367	0.1426		20.4496	15.5066	2.89837
307961	38.898	1.5378	0.1429		20.4601	15.5177	2.90447
308162	38.922	1.5388	0.1432		20.4727	15.5277	2.91057
308362	38.944	1.5398	0.1435		20.4843	15.5378	2.91667
308563	38.968	1.5408	0.1439		20.4969	15.5479	2.9248
308763	38.988	1.5419	0.1441		20.5074	15.559	2.92886
308963	39.01	1.5428	0.1443		20.519	15.5681	2.93293
309164	39.032	1.5438	0.1448		20.5306	15.5782	2.94309
309364	39.054	1.5448	0.145		20.5421	15.5883	2.94715
309565	39.074	1.5459	0.1453		20.5526	15.5994	2.95325
309765	39.098	1.5469	0.1457		20.5653	15.6095	2.96138
309965	39.122	1.5478	0.1459		20.5779	15.6186	2.96545
310166	39.142	1.5489	0.1463		20.5884	15.6297	2.97358
310366	39.162	1.5499	0.1466		20.5989	15.6398	2.97967
310567	39.184	1.5508	0.1469		20.6105	15.6488	2.98577
310767	39.21	1.5518	0.1472		20.6242	15.6589	2.99187
310967	39.232	1.5528	0.1475		20.6358	15.669	2.99797
311169	39.252	1.5539	0.1478		20.6463	15.6801	3.00407
311370	39.27	1.555	0.1481		20.6557	15.6912	3.01016
311570	39.294	1.5559	0.1484		20.6684	15.7003	3.01626
311771	39.312	1.5568	0.1487		20.6778	15.7094	3.02236
311971	39.33	1.5579	0.1491		20.6873	15.7205	3.03049
312171	39.354	1.5588	0.1493		20.6999	15.7296	3.03455
312372	39.376	1.5597	0.1497		20.7115	15.7386	3.04268
312572	39.398	1.5608	0.1499		20.7231	15.7497	3.04675
312773	39.422	1.5618	0.1502		20.7357	15.7598	3.05285
312973	39.444	1.5629	0.1507		20.7473	15.7709	3.06301
313173	39.468	1.5639	0.1509		20.7599	15.781	3.06707
313374	39.488	1.5648	0.1512		20.7704	15.7901	3.07317
313574	39.51	1.5659	0.1516		20.782	15.8012	3.0813
313775	39.524	1.5669	0.1519		20.7893	15.8113	3.0874
313975	39.54	1.5678	0.1522		20.7978	15.8204	3.0935
314175	39.562	1.5688	0.1524		20.8093	15.8305	3.09756
314377	39.58	1.5698	0.1527		20.8188	15.8406	3.10366
314578	39.596	1.5708	0.1531		20.8272	15.8507	3.11179
314778	39.618	1.5719	0.1534		20.8388	15.8618	3.11789
314979	39.64	1.5729	0.1537		20.8504	15.8718	3.12398
315179	39.662	1.5739	0.154		20.8619	15.8819	3.13008
315379	39.682	1.5748	0.1543		20.8725	15.891	3.13618
315580	39.696	1.5758	0.1546		20.8798	15.9011	3.14228
315780	39.716	1.5768	0.1549		20.8903	15.9112	3.14837
315981	39.742	1.5778	0.1552		20.904	15.9213	3.15447
316181	39.754	1.5788	0.1555		20.9103	15.9314	3.16057
316381	39.776	1.5798	0.1559		20.9219	15.9415	3.1687
316582	39.798	1.5809	0.1562		20.9335	15.9526	3.1748
316782	39.816	1.5819	0.1564		20.9429	15.9627	3.17886
316983	39.832	1.5829	0.1568		20.9514	15.9728	3.18699
317183	39.852	1.5839	0.1572		20.9619	15.9828	3.19512
317383	39.868	1.5848	0.1574		20.9703	15.9919	3.19919
317585	39.892	1.5859	0.1577		20.9829	16.003	3.20528
317786	39.912	1.587	0.1581		20.9934	16.0141	3.21341
317986	39.934	1.5879	0.1584		21.005	16.0232	3.21951
318187	39.948	1.5889	0.1586		21.0124	16.0333	3.22358
318387	39.964	1.5899	0.1589		21.0208	16.0434	3.22967
318587	39.982	1.5908	0.1593		21.0302	16.0525	3.2378
318788	40.002	1.5917	0.1596		21.0408	16.0616	3.2439
318988	40.022	1.5927	0.1599		21.0513	16.0716	3.25
319189	40.04	1.5938	0.1602		21.0608	16.0827	3.2561
319389	40.06	1.5948	0.1605		21.0713	16.0928	3.2622
319589	40.086	1.5958	0.1608		21.085	16.1029	3.26829
319790	40.102	1.5969	0.1612		21.0934	16.114	3.27642
319990	40.122	1.5978	0.1614		21.1039	16.1231	3.28049
320191	40.138	1.599	0.1617		21.1123	16.1352	3.28659
320391	40.15	1.5999	0.1621		21.1186	16.1443	3.29472
320591	40.166	1.6008	0.1624		21.127	16.1534	3.30081
320793	40.184	1.6019	0.1628		21.1365	16.1645	3.30894
320994	40.2	1.6029	0.1631		21.1449	16.1746	3.31504
321194	40.228	1.6039	0.1633		21.1596	16.1847	3.31911
321395	40.248	1.6049	0.1636		21.1702	16.1948	3.3252
321595	40.262	1.606	0.1639		21.1775	16.2059	3.3313
321795	40.28	1.6069	0.1644		21.187	16.2149	3.34146
321996	40.3	1.6079	0.1646		21.1975	16.225	3.34553
322196	40.312	1.6088	0.1649		21.2038	16.2341	3.35163
322397	40.326	1.6099	0.1652		21.2112	16.2452	3.35772
322597	40.344	1.6108	0.1655		21.2207	16.2543	3.36382
322797	40.37	1.6119	0.1659		21.2343	16.2654	3.37195
322998	40.394	1.613	0.1662		21.247	16.2765	3.37805
323198	40.414	1.614	0.1664		21.2575	16.2866	3.38211
323399	40.428	1.6149	0.1668		21.2648	16.2957	3.39024
323599	40.448	1.6161	0.1671		21.2754	16.3078	3.39634
323799	40.462	1.617	0.1675		21.2827	16.3169	3.40447
324000	40.478	1.618	0.1678		21.2911	16.3269	3.41057
324200	40.494	1.619	0.1681		21.2996	16.337	3.41667
324401	40.508	1.62	0.1683		21.3069	16.3471	3.42073
324601	40.526	1.6209	0.1688		21.3164	16.3562	3.43089
324801	40.54	1.6221	0.1691		21.3238	16.3683	3.43699
325003	40.556	1.623	0.1694		21.3322	16.3774	3.44309
325204	40.572	1.624	0.1697		21.3406	16.3875	3.44919
325404	40.592	1.625	0.1702		21.3511	16.3976	3.45935
325605	40.608	1.626	0.1705		21.3595	16.4077	3.46545
325805	40.618	1.6271	0.1706		21.3648	16.4188	3.46748
326005	40.638	1.6279	0.171		21.3753	16.4268	3.47561
326206	40.658	1.629	0.1713		21.3858	16.4379	3.48171
326406	40.682	1.6301	0.1717		21.3984	16.449	3.48984
326607	40.696	1.631	0.172		21.4058	16.4581	3.49593
326807	40.712	1.6321	0.1723		21.4142	16.4692	3.50203
327007	40.724	1.633	0.1728		21.4205	16.4783	3.5122
327208	40.736	1.634	0.173		21.4268	16.4884	3.51626
327408	40.754	1.635	0.1734		21.4363	16.4985	3.52439
327609	40.77	1.636	0.1738		21.4447	16.5086	3.53252
327809	40.784	1.637	0.174		21.4521	16.5187	3.53659
328009	40.8	1.638	0.1743		21.4605	16.5288	3.54268
328211	40.814	1.6391	0.1746		21.4679	16.5399	3.54878
328412	40.828	1.64	0.1749		21.4752	16.5489	3.55488
328612	40.84	1.6409	0.1753		21.4816	16.558	3.56301
328813	40.858	1.642	0.1756		21.491	16.5691	3.56911
329013	40.87	1.643	0.176		21.4973	16.5792	3.57724
329213	40.89	1.6439	0.1762		21.5079	16.5883	3.5813
329414	40.906	1.645	0.1765		21.5163	16.5994	3.5874
329614	40.92	1.6461	0.1769		21.5236	16.6105	3.59553
329815	40.934	1.647	0.1773		21.531	16.6196	3.60366
330015	40.948	1.648	0.1776		21.5384	16.6297	3.60976
330215	40.962	1.649	0.1779		21.5457	16.6398	3.61585
330416	40.976	1.65	0.1783		21.5531	16.6498	3.62398
330616	40.988	1.651	0.1786		21.5594	16.6599	3.63008
330817	41.004	1.6519	0.1789		21.5678	16.669	3.63618
331017	41.024	1.6529	0.1793		21.5783	16.6791	3.64431
331217	41.038	1.654	0.1796		21.5857	16.6902	3.65041
331419	41.05	1.6551	0.1799		21.592	16.7013	3.6565
331620	41.066	1.6561	0.1803		21.6004	16.7114	3.66463
331820	41.08	1.657	0.1805		21.6078	16.7205	3.6687
332021	41.096	1.6579	0.1809		21.6162	16.7296	3.67683
332221	41.112	1.659	0.1812		21.6246	16.7407	3.68293
332421	41.128	1.66	0.1815		21.633	16.7508	3.68902
332622	41.146	1.6611	0.1819		21.6425	16.7619	3.69715
332822	41.158	1.662	0.1822		21.6488	16.7709	3.70325
333023	41.172	1.663	0.1826		21.6562	16.781	3.71138
333223	41.186	1.6641	0.1829		21.6635	16.7921	3.71748
333423	41.198	1.6649	0.1832		21.6699	16.8002	3.72358
333624	41.216	1.6661	0.1835		21.6793	16.8123	3.72967
333824	41.22	1.6671	0.1838		21.6814	16.8224	3.73577
334025	41.23	1.668	0.1841		21.6867	16.8315	3.74187
334225	41.244	1.669	0.1844		21.6941	16.8416	3.74797
334425	41.26	1.67	0.1848		21.7025	16.8517	3.7561
334627	41.276	1.6709	0.1851		21.7109	16.8607	3.7622
334828	41.296	1.6721	0.1854		21.7214	16.8729	3.76829
335028	41.312	1.673	0.1857		21.7298	16.8819	3.77439
335229	41.328	1.6739	0.1861		21.7382	16.891	3.78252
335429	41.34	1.6751	0.1864		21.7445	16.9031	3.78862
335629	41.36	1.6761	0.1867		21.7551	16.9132	3.79472
335830	41.37	1.6769	0.187		21.7603	16.9213	3.80081
336030	41.382	1.678	0.1873		21.7666	16.9324	3.80691
336231	41.394	1.679	0.1877		21.773	16.9425	3.81504
336431	41.414	1.6801	0.1881		21.7835	16.9536	3.82317
336631	41.432	1.6811	0.1884		21.7929	16.9637	3.82927
336832	41.45	1.6821	0.1888		21.8024	16.9738	3.8374
337032	41.466	1.6832	0.1891		21.8108	16.9849	3.8435
337233	41.472	1.6842	0.1894		21.814	16.995	3.84959
337433	41.48	1.6852	0.1898		21.8182	17.005	3.85772
337633	41.486	1.6861	0.1901		21.8213	17.0141	3.86382
337835	41.51	1.6871	0.1904		21.834	17.0242	3.86992
338036	41.522	1.6882	0.1908		21.8403	17.0353	3.87805
338236	41.532	1.6892	0.1912		21.8455	17.0454	3.88618
338437	41.542	1.6902	0.1914		21.8508	17.0555	3.89024
338637	41.554	1.691	0.1917		21.8571	17.0636	3.89634
338837	41.57	1.6921	0.1921		21.8655	17.0747	3.90447
339038	41.576	1.6931	0.1924		21.8687	17.0848	3.91057
339238	41.58	1.6942	0.1927		21.8708	17.0959	3.91667
339439	41.576	1.6952	0.193		21.8687	17.106	3.92276
339639	41.582	1.6963	0.1933		21.8718	17.1171	3.92886
339839	41.584	1.6972	0.1937		21.8729	17.1261	3.93699
340040	41.594	1.6981	0.194		21.8782	17.1352	3.94309
340240	41.602	1.6992	0.1943		21.8824	17.1463	3.94919
340441	41.614	1.7	0.1947		21.8887	17.1544	3.95732
340641	41.626	1.701	0.195		21.895	17.1645	3.96341
340841	41.636	1.7021	0.1954		21.9002	17.1756	3.97154
341043	41.65	1.7031	0.1957		21.9076	17.1857	3.97764
341244	41.66	1.7041	0.1961		21.9129	17.1958	3.98577
341444	41.674	1.7051	0.1965		21.9202	17.2059	3.9939
341645	41.682	1.7061	0.1968		21.9244	17.2159	4
341845	41.692	1.7072	0.1971		21.9297	17.227	4.0061
342045	41.71	1.708	0.1974		21.9392	17.2351	4.0122
342246	41.718	1.7091	0.1977		21.9434	17.2462	4.01829
342446	41.728	1.7101	0.198		21.9486	17.2563	4.02439
342647	41.738	1.7111	0.1985		21.9539	17.2664	4.03455
342847	41.75	1.7121	0.1987		21.9602	17.2765	4.03862
343047	41.766	1.7131	0.1991		21.9686	17.2866	4.04675
343248	41.778	1.7141	0.1994		21.9749	17.2967	4.05285
343448	41.788	1.7153	0.1998		21.9802	17.3088	4.06098
343649	41.794	1.7161	0.2001		21.9833	17.3169	4.06707
343849	41.81	1.7171	0.2006		21.9918	17.3269	4.07724
344049	41.822	1.7181	0.2008		21.9981	17.337	4.0813
344250	41.832	1.7191	0.2012		22.0033	17.3471	4.08943
344450	41.844	1.7201	0.2015		22.0096	17.3572	4.09553
344651	41.852	1.7211	0.2018		22.0139	17.3673	4.10163
344851	41.866	1.7221	0.2021		22.0212	17.3774	4.10772
345051	41.878	1.723	0.2025		22.0275	17.3865	4.11585
345253	41.896	1.724	0.2029		22.037	17.3966	4.12398
345454	41.906	1.7251	0.2032		22.0423	17.4077	4.13008
345654	41.918	1.7261	0.2036		22.0486	17.4178	4.13821
345855	41.93	1.7271	0.2039		22.0549	17.4279	4.14431
346055	41.944	1.7281	0.2043		22.0622	17.4379	4.15244
346255	41.952	1.7291	0.2046		22.0665	17.448	4.15854
346456	41.966	1.7301	0.2049		22.0738	17.4581	4.16463
346656	41.978	1.7312	0.2053		22.0801	17.4692	4.17276
346857	41.988	1.7321	0.2056		22.0854	17.4783	4.17886
347057	41.994	1.7332	0.2059		22.0885	17.4894	4.18496
347257	42	1.7342	0.2063		22.0917	17.4995	4.19309
347458	42.004	1.7351	0.2066		22.0938	17.5086	4.19919
347658	42.008	1.7361	0.2069		22.0959	17.5187	4.20528
347859	42.02	1.7371	0.2072		22.1022	17.5288	4.21138
348059	42.032	1.7382	0.2076		22.1085	17.5399	4.21951
348259	42.046	1.7392	0.208		22.1159	17.5499	4.22764
348461	42.06	1.7401	0.2083		22.1233	17.559	4.23374
348662	42.066	1.7411	0.2086		22.1264	17.5691	4.23984
348862	42.078	1.7421	0.209		22.1327	17.5792	4.24797
349063	42.086	1.7431	0.2093		22.1369	17.5893	4.25407
349263	42.094	1.7441	0.2097		22.1411	17.5994	4.2622
349463	42.106	1.7452	0.21		22.1475	17.6105	4.26829
349664	42.112	1.7461	0.2105		22.1506	17.6196	4.27846
349864	42.116	1.747	0.2107		22.1527	17.6287	4.28252
350065	42.128	1.7481	0.2111		22.159	17.6398	4.29065
350265	42.092	1.7492	0.2113		22.1401	17.6509	4.29472
350465	42.082	1.7504	0.2116		22.1348	17.663	4.30081
350666	42.076	1.7513	0.2119		22.1317	17.672	4.30691
350866	42.074	1.7523	0.2122		22.1306	17.6821	4.31301
351067	42.074	1.7533	0.2126		22.1306	17.6922	4.32114
351267	42.074	1.7542	0.2129		22.1306	17.7013	4.32724
351467	42.08	1.7553	0.2132		22.1338	17.7124	4.33333
351669	42.08	1.7562	0.2134		22.1338	17.7215	4.3374
351870	42.086	1.7572	0.2138		22.1369	17.7316	4.34553
352070	42.094	1.7582	0.2142		22.1411	17.7417	4.35366
352271	42.102	1.7591	0.2145		22.1454	17.7508	4.35976
352471	42.11	1.7602	0.2149		22.1496	17.7619	4.36789
352671	42.12	1.7611	0.2152		22.1548	17.7709	4.37398
352872	42.13	1.7622	0.2155		22.1601	17.782	4.38008
353072	42.142	1.7632	0.2159		22.1664	17.7921	4.38821
353273	42.146	1.7642	0.2162		22.1685	17.8022	4.39431
353473	42.156	1.7651	0.2166		22.1738	17.8113	4.40244
353673	42.166	1.7662	0.217		22.179	17.8224	4.41057
353874	42.178	1.7672	0.2173		22.1853	17.8325	4.41667
354074	42.186	1.7682	0.2177		22.1895	17.8426	4.4248
354275	42.194	1.7692	0.2181		22.1937	17.8527	4.43293
354475	42.198	1.7702	0.2183		22.1958	17.8628	4.43699
354675	42.208	1.7712	0.2186		22.2011	17.8729	4.44309
354877	42.22	1.7722	0.219		22.2074	17.8829	4.45122
355078	42.228	1.7732	0.2193		22.2116	17.893	4.45732
355278	42.234	1.7741	0.2198		22.2148	17.9021	4.46748
355479	42.244	1.7752	0.2201		22.22	17.9132	4.47358
355679	42.254	1.7762	0.2204		22.2253	17.9233	4.47967
355879	42.264	1.7772	0.2207		22.2306	17.9334	4.48577
356080	42.272	1.7782	0.221		22.2348	17.9435	4.49187
356280	42.282	1.7791	0.2214		22.24	17.9526	4.5
356481	42.292	1.7802	0.2217		22.2453	17.9637	4.5061
356681	42.296	1.7812	0.2221		22.2474	17.9738	4.51423
356881	42.304	1.7822	0.2225		22.2516	17.9839	4.52236
357082	42.316	1.7831	0.2228		22.2579	17.9929	4.52846
357282	42.322	1.7842	0.2231		22.2611	18.004	4.53455
357483	42.338	1.7853	0.2234		22.2695	18.0151	4.54065
357683	42.346	1.7862	0.2237		22.2737	18.0242	4.54675
357883	42.352	1.7872	0.2241		22.2769	18.0343	4.55488
358085	42.358	1.7881	0.2244		22.28	18.0434	4.56098
358286	42.372	1.7892	0.2248		22.2874	18.0545	4.56911
358486	42.382	1.7903	0.2252		22.2926	18.0656	4.57724
358687	42.384	1.7913	0.2255		22.2937	18.0757	4.58333
358887	42.392	1.7922	0.2259		22.2979	18.0848	4.59146
359087	42.402	1.7932	0.2262		22.3032	18.0949	4.59756
359288	42.408	1.7941	0.2266		22.3063	18.1039	4.60569
359488	42.412	1.7952	0.2269		22.3084	18.115	4.61179
359689	42.424	1.7961	0.2273		22.3147	18.1241	4.61992
359889	42.432	1.7972	0.2277		22.3189	18.1352	4.62805
360089	42.44	1.7981	0.228		22.3231	18.1443	4.63415
360290	42.446	1.7993	0.2284		22.3263	18.1564	4.64228
360490	42.452	1.8003	0.2288		22.3295	18.1665	4.65041
360691	42.464	1.8012	0.2291		22.3358	18.1756	4.6565
360891	42.464	1.8023	0.2294		22.3358	18.1867	4.6626
361091	42.47	1.8031	0.2298		22.3389	18.1948	4.67073
361293	42.48	1.8043	0.2301		22.3442	18.2069	4.67683
361494	42.488	1.8054	0.2304		22.3484	18.218	4.68293
361694	42.494	1.8063	0.2308		22.3515	18.227	4.69106
361895	42.498	1.8073	0.2312		22.3536	18.2371	4.69919
362095	42.51	1.8081	0.2315		22.36	18.2452	4.70528
362295	42.52	1.8092	0.2318		22.3652	18.2563	4.71138
362496	42.528	1.8102	0.2322		22.3694	18.2664	4.71951
362696	42.538	1.8112	0.2325		22.3747	18.2765	4.72561
362897	42.544	1.8122	0.2329		22.3778	18.2866	4.73374
363097	42.55	1.8132	0.2332		22.381	18.2967	4.73984
363297	42.556	1.8142	0.2336		22.3842	18.3068	4.74797
363498	42.566	1.8152	0.2341		22.3894	18.3169	4.75813
363698	42.574	1.8162	0.2342		22.3936	18.3269	4.76016
363899	42.582	1.8172	0.2347		22.3978	18.337	4.77033
364099	42.586	1.8182	0.2349		22.3999	18.3471	4.77439
364299	42.6	1.8193	0.2354		22.4073	18.3582	4.78455
364500	42.604	1.8202	0.2357		22.4094	18.3673	4.79065
364700	42.614	1.8214	0.2361		22.4147	18.3794	4.79878
364901	42.618	1.8223	0.2364		22.4168	18.3885	4.80488
365101	42.624	1.8233	0.2367		22.4199	18.3986	4.81098
365301	42.622	1.8242	0.237		22.4189	18.4077	4.81707
365503	42.628	1.8253	0.2373		22.422	18.4188	4.82317
365704	42.63	1.8262	0.2377		22.4231	18.4279	4.8313
365904	42.632	1.8272	0.2381		22.4241	18.4379	4.83943
366105	42.64	1.8282	0.2383		22.4283	18.448	4.8435
366305	42.648	1.8293	0.2387		22.4325	18.4591	4.85163
366505	42.656	1.8302	0.2391		22.4368	18.4682	4.85976
366706	42.668	1.8314	0.2395		22.4431	18.4803	4.86789
366906	42.674	1.8324	0.2398		22.4462	18.4904	4.87398
367107	42.678	1.8332	0.2401		22.4483	18.4985	4.88008
367307	42.68	1.8342	0.2406		22.4494	18.5086	4.89024
367507	42.684	1.8354	0.2408		22.4515	18.5207	4.89431
367708	42.686	1.8364	0.2412		22.4525	18.5308	4.90244
367908	42.696	1.8373	0.2417		22.4578	18.5399	4.9126
368109	42.7	1.8383	0.242		22.4599	18.5499	4.9187
368309	42.704	1.8393	0.2424		22.462	18.56	4.92683
368509	42.704	1.8403	0.2427		22.462	18.5701	4.93293
368711	42.71	1.8413	0.2431		22.4652	18.5802	4.94106
368912	42.716	1.8422	0.2434		22.4683	18.5893	4.94715
369112	42.722	1.8433	0.2437		22.4715	18.6004	4.95325
369313	42.726	1.8443	0.2441		22.4736	18.6105	4.96138
369513	42.728	1.8453	0.2445		22.4746	18.6206	4.96951
369713	42.732	1.8463	0.2448		22.4767	18.6307	4.97561
369914	42.736	1.8473	0.2453		22.4788	18.6408	4.98577
370114	42.74	1.8483	0.2456		22.4809	18.6509	4.99187
370315	42.748	1.8493	0.2459		22.4851	18.6609	4.99797
370515	42.75	1.8503	0.2462		22.4862	18.671	5.00407
370715	42.752	1.8513	0.2466		22.4873	18.6811	5.0122
370916	42.762	1.8522	0.2469		22.4925	18.6902	5.01829
371116	42.768	1.8534	0.2473		22.4957	18.7023	5.02642
371317	42.774	1.8543	0.2477		22.4988	18.7114	5.03455
371517	42.78	1.8553	0.248		22.502	18.7215	5.04065
371717	42.778	1.8562	0.2484		22.5009	18.7306	5.04878
371919	42.782	1.8573	0.2488		22.503	18.7417	5.05691
372120	42.79	1.8583	0.2491		22.5072	18.7518	5.06301
372320	42.794	1.8593	0.2494		22.5093	18.7619	5.06911
372521	42.802	1.8603	0.2499		22.5135	18.7719	5.07927
372721	42.804	1.8613	0.2502		22.5146	18.782	5.08537
372921	42.802	1.8622	0.2505		22.5135	18.7911	5.09146
373122	42.812	1.8633	0.251		22.5188	18.8022	5.10163
373322	42.814	1.8644	0.2513		22.5199	18.8133	5.10772
373523	42.814	1.8654	0.2517		22.5199	18.8234	5.11585
373723	42.812	1.8663	0.252		22.5188	18.8325	5.12195
373923	42.808	1.8673	0.2523		22.5167	18.8426	5.12805
374124	42.808	1.8683	0.2527		22.5167	18.8527	5.13618
374324	42.812	1.8694	0.2531		22.5188	18.8638	5.14431
374525	42.812	1.8704	0.2535		22.5188	18.8739	5.15244
374725	42.814	1.8714	0.2538		22.5199	18.884	5.15854
374925	42.82	1.8724	0.2543		22.523	18.894	5.1687
375127	42.82	1.8735	0.2546		22.523	18.9051	5.1748
375328	42.82	1.8744	0.255		22.523	18.9142	5.18293
375528	42.824	1.8754	0.2553		22.5251	18.9243	5.18902
375729	42.826	1.8765	0.2557		22.5262	18.9354	5.19715
375929	42.826	1.8774	0.256		22.5262	18.9445	5.20325
376129	42.832	1.8784	0.2564		22.5293	18.9546	5.21138
376330	42.834	1.8795	0.2567		22.5304	18.9657	5.21748
376530	42.838	1.8804	0.2571		22.5325	18.9748	5.22561
376731	42.844	1.8813	0.2574		22.5356	18.9839	5.23171
376931	42.852	1.8823	0.2578		22.5398	18.9939	5.23984
377131	42.862	1.8835	0.2581		22.5451	19.0061	5.24593
377332	42.858	1.8845	0.2586		22.543	19.0161	5.2561
377532	42.862	1.8854	0.2589		22.5451	19.0252	5.2622
377733	42.862	1.8862	0.2593		22.5451	19.0333	5.27033
377933	42.868	1.8873	0.2596		22.5483	19.0444	5.27642
378133	42.876	1.8884	0.26		22.5525	19.0555	5.28455
378335	42.876	1.8894	0.2603		22.5525	19.0656	5.29065
378536	42.88	1.8903	0.2607		22.5546	19.0747	5.29878
378736	42.886	1.8914	0.2612		22.5577	19.0858	5.30894
378937	42.888	1.8924	0.2615		22.5588	19.0959	5.31504
379137	42.892	1.8934	0.2619		22.5609	19.106	5.32317
379337	42.902	1.8944	0.2623		22.5661	19.116	5.3313
379538	42.908	1.8954	0.2627		22.5693	19.1261	5.33943
379738	42.91	1.8963	0.263		22.5704	19.1352	5.34553
379939	42.914	1.8973	0.2635		22.5725	19.1453	5.35569
380139	42.922	1.8984	0.2638		22.5767	19.1564	5.36179
380339	42.922	1.8994	0.2643		22.5767	19.1665	5.37195
380540	42.922	1.9005	0.2646		22.5767	19.1776	5.37805
380740	42.924	1.9014	0.265		22.5777	19.1867	5.38618
380941	42.928	1.9024	0.2654		22.5798	19.1968	5.39431
381141	42.93	1.9034	0.2658		22.5809	19.2069	5.40244
381341	42.932	1.9043	0.2661		22.5819	19.2159	5.40854
381543	42.934	1.9053	0.2665		22.583	19.226	5.41667
381744	42.942	1.9063	0.267		22.5872	19.2361	5.42683
381944	42.946	1.9072	0.2673		22.5893	19.2452	5.43293
382145	42.95	1.9084	0.2678		22.5914	19.2573	5.44309
382345	42.95	1.9095	0.2681		22.5914	19.2684	5.44919
382545	42.96	1.9105	0.2685		22.5967	19.2785	5.45732
382746	42.964	1.9114	0.2688		22.5988	19.2876	5.46341
382946	42.966	1.9123	0.2693		22.5998	19.2967	5.47358
383147	42.968	1.9134	0.2696		22.6009	19.3078	5.47967
383347	42.972	1.9144	0.2701		22.603	19.3179	5.48984
383547	42.974	1.9153	0.2704		22.604	19.3269	5.49593
383748	42.978	1.9163	0.2708		22.6061	19.337	5.50407
383948	42.982	1.9174	0.2712		22.6082	19.3481	5.5122
384149	42.984	1.9184	0.2716		22.6093	19.3582	5.52033
384349	42.99	1.9194	0.272		22.6124	19.3683	5.52846
384549	42.992	1.9205	0.2725		22.6135	19.3794	5.53862
384750	42.994	1.9215	0.2728		22.6145	19.3895	5.54472
384950	42.998	1.9224	0.2732		22.6166	19.3986	5.55285
385151	42.996	1.9235	0.2736		22.6156	19.4097	5.56098
385351	43.002	1.9244	0.2739		22.6187	19.4188	5.56707
385551	43.002	1.9254	0.2743		22.6187	19.4289	5.5752
385753	43.002	1.9264	0.2748		22.6187	19.439	5.58537
385954	43.006	1.9274	0.2752		22.6209	19.449	5.5935
386154	43.008	1.9284	0.2755		22.6219	19.4591	5.59959
386355	43.014	1.9295	0.2759		22.6251	19.4702	5.60772
386555	43.02	1.9304	0.2763		22.6282	19.4793	5.61585
386755	43.018	1.9315	0.2767		22.6272	19.4904	5.62398
386956	43.018	1.9324	0.277		22.6272	19.4995	5.63008
387156	43.022	1.9333	0.2775		22.6293	19.5086	5.64024
387357	43.03	1.9345	0.2778		22.6335	19.5207	5.64634
387557	43.03	1.9354	0.2781		22.6335	19.5298	5.65244
387757	43.028	1.9365	0.2786		22.6324	19.5409	5.6626
387958	43.03	1.9376	0.2789		22.6335	19.552	5.6687
388158	43.026	1.9385	0.2794		22.6314	19.561	5.67886
388359	43.022	1.9394	0.2798		22.6293	19.5701	5.68699
388559	43.036	1.9406	0.28		22.6366	19.5822	5.69106
388759	43.052	1.9416	0.2804		22.645	19.5923	5.69919
388961	43.048	1.9426	0.2809		22.6429	19.6024	5.70935
389162	43.048	1.9436	0.2813		22.6429	19.6125	5.71748
389362	43.054	1.9446	0.2817		22.6461	19.6226	5.72561
389563	43.06	1.9456	0.2821		22.6493	19.6327	5.73374
389763	43.06	1.9467	0.2824		22.6493	19.6438	5.73984
389963	43.06	1.9476	0.2828		22.6493	19.6529	5.74797
390164	43.068	1.9487	0.2832		22.6535	19.664	5.7561
390364	43.068	1.9496	0.2836		22.6535	19.6731	5.76423
390565	43.072	1.9506	0.2839		22.6556	19.6831	5.77033
390765	43.07	1.9517	0.2844		22.6545	19.6942	5.78049
390965	43.068	1.9527	0.2847		22.6535	19.7043	5.78659
391166	43.066	1.9538	0.2851		22.6524	19.7154	5.79472
391366	43.066	1.9547	0.2855		22.6524	19.7245	5.80285
391567	43.066	1.9555	0.2858		22.6524	19.7326	5.80894
391767	43.07	1.9566	0.2863		22.6545	19.7437	5.81911
391967	43.074	1.9576	0.2867		22.6566	19.7538	5.82724
392169	43.08	1.9586	0.2871		22.6598	19.7639	5.83537
392370	43.082	1.9597	0.2875		22.6608	19.775	5.8435
392570	43.084	1.9606	0.2879		22.6619	19.7841	5.85163
392771	43.084	1.9616	0.2882		22.6619	19.7941	5.85772
392971	43.084	1.9625	0.2886		22.6619	19.8032	5.86585
393171	43.084	1.9636	0.2891		22.6619	19.8143	5.87602
393372	43.084	1.9646	0.2895		22.6619	19.8244	5.88415
393572	43.086	1.9657	0.2899		22.6629	19.8355	5.89228
393773	43.088	1.9667	0.2904		22.664	19.8456	5.90244
393973	43.09	1.9676	0.2908		22.665	19.8547	5.91057
394173	43.088	1.9686	0.2912		22.664	19.8648	5.9187
394374	43.094	1.9696	0.2916		22.6671	19.8749	5.92683
394574	43.098	1.9707	0.292		22.6692	19.886	5.93496
394775	43.098	1.9716	0.2924		22.6692	19.8951	5.94309
394975	43.102	1.9726	0.2928		22.6713	19.9051	5.95122
395175	43.098	1.9736	0.2933		22.6692	19.9152	5.96138
395377	43.1	1.9747	0.2936		22.6703	19.9263	5.96748
395578	43.106	1.9756	0.2941		22.6735	19.9354	5.97764
395778	43.106	1.9768	0.2945		22.6735	19.9475	5.98577
395979	43.102	1.9777	0.2949		22.6713	19.9566	5.9939
396179	43.102	1.9787	0.2953		22.6713	19.9667	6.00203
396379	43.1	1.9797	0.2956		22.6703	19.9768	6.00813
396580	43.1	1.9806	0.2961		22.6703	19.9859	6.01829
396780	43.098	1.9816	0.2965		22.6692	19.996	6.02642
396981	43.098	1.9825	0.2969		22.6692	20.005	6.03455
397181	43.098	1.9835	0.2974		22.6692	20.0151	6.04472
397381	43.1	1.9845	0.2977		22.6703	20.0252	6.05081
397582	43.102	1.9856	0.2981		22.6713	20.0363	6.05894
397782	43.104	1.9866	0.2985		22.6724	20.0464	6.06707
397983	43.106	1.9876	0.299		22.6735	20.0565	6.07724
398183	43.108	1.9887	0.2993		22.6745	20.0676	6.08333
398383	43.114	1.9897	0.2998		22.6777	20.0777	6.0935
398585	43.11	1.9907	0.3001		22.6756	20.0878	6.09959
398786	43.108	1.9916	0.3007		22.6745	20.0969	6.11179
398986	43.108	1.9927	0.3011		22.6745	20.108	6.11992
399187	43.108	1.9937	0.3015		22.6745	20.1181	6.12805
399387	43.112	1.9947	0.3019		22.6766	20.1282	6.13618
399587	43.106	1.9956	0.3024		22.6735	20.1372	6.14634
[truncated: 544 more rows]

## Sheet: 45A-5-B
time: 17:14:58,07/02/2019
diameter : 49.2	mm	height: 99.2	mm
Vertical 100kN force sensor (vertical force of test piece)
Control mode: displacement	Waveform: ramp
mm/s	End point: 2.3915	mm
time (ms)	vertical force (KN)	vertical deformation (mm)	transverse deformation (mm)		stress	axial strain	transverse strain
0	0	0	0		0	0	0
200	0.008	0.001	-0.0001		0.00420794	0.0100806	-0.00203252
400	0.016	0.0027	-0.0006		0.00841589	0.0272177	-0.0121951
601	0.022	0.0026	-0.0006		0.0115718	0.0262097	-0.0121951
801	0.028	0.0049	-0.001		0.0147278	0.0493952	-0.0203252
1003	0.028	0.0048	-0.001		0.0147278	0.0483871	-0.0203252
1204	0.022	0.0061	-0.0015		0.0115718	0.0614919	-0.0304878
1404	0.038	0.0078	-0.0017		0.0199877	0.078629	-0.0345528
1605	0.034	0.0078	-0.0017		0.0178838	0.078629	-0.0345528
1805	0.044	0.0098	-0.0021		0.0231437	0.0987903	-0.0426829
2005	0.04	0.0098	-0.0022		0.0210397	0.0987903	-0.0447154
2206	0.046	0.0113	-0.0027		0.0241957	0.113911	-0.054878
2406	0.058	0.0125	-0.0029		0.0305076	0.126008	-0.0589431
2607	0.052	0.0132	-0.0032		0.0273516	0.133065	-0.0650407
2807	0.056	0.0141	-0.0034		0.0294556	0.142137	-0.0691057
3007	0.058	0.0154	-0.0037		0.0305076	0.155242	-0.0752033
3208	0.058	0.0162	-0.0039		0.0305076	0.163306	-0.0792683
3408	0.064	0.0173	-0.0041		0.0336635	0.174395	-0.0833333
3608	0.068	0.0183	-0.0045		0.0357675	0.184476	-0.0914634
3809	0.068	0.0192	-0.0048		0.0357675	0.193548	-0.097561
4009	0.07	0.0202	-0.0051		0.0368195	0.203629	-0.103659
4211	0.072	0.0212	-0.0054		0.0378715	0.21371	-0.109756
4412	0.074	0.0222	-0.0056		0.0389235	0.22379	-0.113821
4612	0.076	0.0233	-0.006		0.0399755	0.234879	-0.121951
4813	0.078	0.0242	-0.0062		0.0410274	0.243952	-0.126016
5013	0.084	0.0253	-0.0065		0.0441834	0.25504	-0.132114
5213	0.084	0.0263	-0.0067		0.0441834	0.265121	-0.136179
5414	0.086	0.0273	-0.007		0.0452354	0.275202	-0.142276
5614	0.088	0.0282	-0.0073		0.0462874	0.284274	-0.148374
5815	0.092	0.0293	-0.0075		0.0483914	0.295363	-0.152439
6015	0.094	0.0301	-0.0077		0.0494433	0.303427	-0.156504
6215	0.094	0.0312	-0.0079		0.0494433	0.314516	-0.160569
6416	0.098	0.0322	-0.008		0.0515473	0.324597	-0.162602
6616	0.102	0.0333	-0.0081		0.0536513	0.335685	-0.164634
6816	0.102	0.0343	-0.0082		0.0536513	0.345766	-0.166667
7017	0.104	0.0353	-0.0083		0.0547033	0.355847	-0.168699
7217	0.106	0.0364	-0.0083		0.0557553	0.366935	-0.168699
7419	0.106	0.0377	-0.0082		0.0557553	0.38004	-0.166667
7620	0.108	0.0386	-0.0084		0.0568072	0.389113	-0.170732
7820	0.108	0.0393	-0.0084		0.0568072	0.396169	-0.170732
8021	0.11	0.0403	-0.0084		0.0578592	0.40625	-0.170732
8221	0.112	0.0412	-0.0085		0.0589112	0.415323	-0.172764
8421	0.114	0.0422	-0.0085		0.0599632	0.425403	-0.172764
8622	0.12	0.0432	-0.0086		0.0631192	0.435484	-0.174797
8822	0.12	0.0445	-0.0087		0.0631192	0.448589	-0.176829
9023	0.122	0.0454	-0.0086		0.0641711	0.457661	-0.174797
9223	0.124	0.0465	-0.0086		0.0652231	0.46875	-0.174797
9423	0.122	0.0473	-0.0086		0.0641711	0.476815	-0.174797
9624	0.124	0.0483	-0.0086		0.0652231	0.486895	-0.174797
9824	0.126	0.0493	-0.0086		0.0662751	0.496976	-0.174797
10024	0.13	0.0503	-0.0087		0.0683791	0.507056	-0.176829
10225	0.13	0.0513	-0.0087		0.0683791	0.517137	-0.176829
10425	0.13	0.0523	-0.0087		0.0683791	0.527218	-0.176829
10627	0.132	0.0533	-0.0086		0.0694311	0.537298	-0.174797
10828	0.136	0.0543	-0.0087		0.071535	0.547379	-0.176829
11028	0.138	0.0552	-0.0086		0.072587	0.556452	-0.174797
11229	0.14	0.0563	-0.0086		0.073639	0.56754	-0.174797
11429	0.144	0.0573	-0.0086		0.075743	0.577621	-0.174797
11629	0.144	0.0583	-0.0086		0.075743	0.587702	-0.174797
11830	0.146	0.0593	-0.0086		0.076795	0.597782	-0.174797
12030	0.14	0.0616	-0.0088		0.073639	0.620968	-0.178862
12231	0.112	0.0604	-0.0086		0.0589112	0.608871	-0.174797
12431	0.138	0.0631	-0.0088		0.072587	0.636089	-0.178862
12631	0.122	0.0629	-0.0086		0.0641711	0.634073	-0.174797
12832	0.142	0.0649	-0.0089		0.074691	0.654234	-0.180894
13032	0.132	0.0649	-0.0088		0.0694311	0.654234	-0.178862
13232	0.15	0.0669	-0.0089		0.0788989	0.674395	-0.180894
13433	0.132	0.0669	-0.0089		0.0694311	0.674395	-0.180894
13633	0.148	0.0685	-0.009		0.077847	0.690524	-0.182927
13835	0.144	0.069	-0.0089		0.075743	0.695565	-0.180894
14036	0.154	0.0705	-0.0089		0.0810029	0.710685	-0.180894
14236	0.158	0.0714	-0.009		0.0831069	0.719758	-0.182927
14437	0.154	0.0725	-0.0089		0.0810029	0.730847	-0.180894
14637	0.16	0.0735	-0.0089		0.0841589	0.740927	-0.180894
14837	0.162	0.0743	-0.0089		0.0852109	0.748992	-0.180894
15038	0.164	0.0754	-0.0091		0.0862628	0.760081	-0.184959
15238	0.168	0.0764	-0.0089		0.0883668	0.770161	-0.180894
15439	0.168	0.0774	-0.0089		0.0883668	0.780242	-0.180894
15639	0.172	0.0783	-0.009		0.0904708	0.789315	-0.182927
15839	0.172	0.0794	-0.009		0.0904708	0.800403	-0.182927
16040	0.176	0.0805	-0.0089		0.0925748	0.811492	-0.180894
16240	0.176	0.0814	-0.0089		0.0925748	0.820565	-0.180894
16440	0.176	0.0826	-0.009		0.0925748	0.832661	-0.182927
16641	0.174	0.0836	-0.009		0.0915228	0.842742	-0.182927
16841	0.178	0.0843	-0.009		0.0936267	0.849798	-0.182927
17043	0.182	0.0852	-0.0091		0.0957307	0.858871	-0.184959
17244	0.186	0.0863	-0.009		0.0978347	0.86996	-0.182927
17444	0.188	0.0875	-0.0091		0.0988867	0.882056	-0.184959
17645	0.192	0.0884	-0.0091		0.100991	0.891129	-0.184959
17845	0.19	0.0895	-0.0092		0.0999387	0.902218	-0.186992
18045	0.196	0.0904	-0.0091		0.103095	0.91129	-0.184959
18246	0.196	0.0914	-0.0091		0.103095	0.921371	-0.184959
18446	0.2	0.0924	-0.0091		0.105199	0.931452	-0.184959
18647	0.204	0.0933	-0.0092		0.107303	0.940524	-0.186992
18847	0.204	0.0944	-0.0093		0.107303	0.951613	-0.189024
19047	0.208	0.0952	-0.0093		0.109407	0.959677	-0.189024
19248	0.212	0.0962	-0.0093		0.111511	0.969758	-0.189024
19448	0.212	0.0974	-0.0093		0.111511	0.981855	-0.189024
19649	0.212	0.0985	-0.0094		0.111511	0.992944	-0.191057
19849	0.212	0.0996	-0.0094		0.111511	1.00403	-0.191057
20049	0.216	0.1006	-0.0094		0.113614	1.01411	-0.191057
20250	0.216	0.1014	-0.0095		0.113614	1.02218	-0.193089
20450	0.22	0.1025	-0.0095		0.115718	1.03327	-0.193089
20650	0.222	0.1032	-0.0095		0.11677	1.04032	-0.193089
20851	0.226	0.1043	-0.0096		0.118874	1.05141	-0.195122
21051	0.23	0.1053	-0.0096		0.120978	1.06149	-0.195122
21253	0.23	0.1065	-0.0097		0.120978	1.07359	-0.197154
21454	0.236	0.1076	-0.0098		0.124134	1.08468	-0.199187
21654	0.234	0.1086	-0.0097		0.123082	1.09476	-0.197154
21855	0.238	0.1094	-0.0097		0.125186	1.10282	-0.197154
22055	0.24	0.1106	-0.0097		0.126238	1.11492	-0.197154
22255	0.244	0.1117	-0.0098		0.128342	1.12601	-0.199187
22456	0.244	0.1125	-0.0099		0.128342	1.13407	-0.20122
22656	0.246	0.1136	-0.0099		0.129394	1.14516	-0.20122
22857	0.248	0.1146	-0.0099		0.130446	1.15524	-0.20122
23057	0.25	0.1154	-0.0099		0.131498	1.16331	-0.20122
23257	0.254	0.1164	-0.0099		0.133602	1.17339	-0.20122
23458	0.254	0.1175	-0.0099		0.133602	1.18448	-0.20122
23658	0.258	0.1185	-0.01		0.135706	1.19456	-0.203252
23858	0.258	0.1194	-0.0101		0.135706	1.20363	-0.205285
24059	0.264	0.1204	-0.0102		0.138862	1.21371	-0.207317
24259	0.266	0.1214	-0.0102		0.139914	1.22379	-0.207317
24461	0.268	0.1223	-0.0102		0.140966	1.23286	-0.207317
24662	0.274	0.1233	-0.0103		0.144122	1.24294	-0.20935
24862	0.276	0.1243	-0.0104		0.145174	1.25302	-0.211382
25063	0.28	0.1254	-0.0104		0.147278	1.26411	-0.211382
25263	0.282	0.1266	-0.0105		0.14833	1.27621	-0.213415
25463	0.286	0.1275	-0.0105		0.150434	1.28528	-0.213415
25664	0.288	0.1284	-0.0105		0.151486	1.29435	-0.213415
25864	0.29	0.1293	-0.0106		0.152538	1.30343	-0.215447
26065	0.294	0.1306	-0.0106		0.154642	1.31653	-0.215447
26265	0.298	0.1314	-0.0107		0.156746	1.3246	-0.21748
26465	0.3	0.1324	-0.0108		0.157798	1.33468	-0.219512
26666	0.302	0.1334	-0.0108		0.15885	1.34476	-0.219512
26866	0.304	0.1345	-0.0108		0.159902	1.35585	-0.219512
27066	0.308	0.1353	-0.0109		0.162006	1.36391	-0.221545
27267	0.306	0.1364	-0.0109		0.160954	1.375	-0.221545
27467	0.314	0.1374	-0.011		0.165162	1.38508	-0.223577
27669	0.318	0.1382	-0.011		0.167266	1.39315	-0.223577
27870	0.324	0.1394	-0.0111		0.170422	1.40524	-0.22561
28070	0.326	0.1404	-0.0111		0.171474	1.41532	-0.22561
28271	0.33	0.1414	-0.0111		0.173578	1.4254	-0.22561
28471	0.33	0.1424	-0.0112		0.173578	1.43548	-0.227642
28671	0.334	0.1435	-0.0112		0.175682	1.44657	-0.227642
28872	0.336	0.1444	-0.0113		0.176734	1.45565	-0.229675
29072	0.34	0.1454	-0.0112		0.178838	1.46573	-0.227642
29273	0.344	0.1464	-0.0112		0.180942	1.47581	-0.227642
29473	0.348	0.1473	-0.0113		0.183046	1.48488	-0.229675
29673	0.35	0.1483	-0.0113		0.184098	1.49496	-0.229675
29874	0.354	0.1494	-0.0114		0.186201	1.50605	-0.231707
30074	0.356	0.1507	-0.0114		0.187253	1.51915	-0.231707
30274	0.36	0.1516	-0.0114		0.189357	1.52823	-0.231707
30475	0.36	0.1526	-0.0115		0.189357	1.53831	-0.23374
30675	0.366	0.1536	-0.0115		0.192513	1.54839	-0.23374
30877	0.368	0.1544	-0.0116		0.193565	1.55645	-0.235772
31078	0.37	0.1554	-0.0116		0.194617	1.56653	-0.235772
31278	0.374	0.1565	-0.0116		0.196721	1.57762	-0.235772
31479	0.376	0.1577	-0.0116		0.197773	1.58972	-0.235772
31679	0.372	0.1588	-0.0117		0.195669	1.60081	-0.237805
31879	0.376	0.1596	-0.0117		0.197773	1.60887	-0.237805
32080	0.376	0.1606	-0.0117		0.197773	1.61895	-0.237805
32280	0.384	0.1615	-0.0117		0.201981	1.62802	-0.237805
32481	0.384	0.1623	-0.0118		0.201981	1.63609	-0.239837
32681	0.39	0.1634	-0.0118		0.205137	1.64718	-0.239837
32881	0.394	0.1644	-0.0119		0.207241	1.65726	-0.24187
33082	0.394	0.1654	-0.0119		0.207241	1.66734	-0.24187
33282	0.4	0.1665	-0.0119		0.210397	1.67843	-0.24187
33482	0.402	0.1674	-0.012		0.211449	1.6875	-0.243902
33683	0.408	0.1683	-0.012		0.214605	1.69657	-0.243902
33883	0.41	0.1695	-0.0121		0.215657	1.70867	-0.245935
34085	0.416	0.1703	-0.0121		0.218813	1.71673	-0.245935
34286	0.42	0.1713	-0.0121		0.220917	1.72681	-0.245935
34486	0.424	0.1724	-0.0121		0.223021	1.7379	-0.245935
34687	0.426	0.1735	-0.0121		0.224073	1.74899	-0.245935
34887	0.432	0.1743	-0.0121		0.227229	1.75706	-0.245935
35087	0.434	0.1755	-0.0121		0.228281	1.76915	-0.245935
35288	0.44	0.1765	-0.0122		0.231437	1.77923	-0.247967
35488	0.442	0.1774	-0.0122		0.232489	1.78831	-0.247967
35689	0.444	0.1786	-0.0123		0.233541	1.8004	-0.25
35889	0.452	0.1796	-0.0123		0.237749	1.81048	-0.25
36089	0.452	0.1806	-0.0123		0.237749	1.82056	-0.25
36290	0.456	0.1815	-0.0123		0.239853	1.82964	-0.25
36490	0.462	0.1825	-0.0124		0.243009	1.83972	-0.252033
36690	0.464	0.1836	-0.0124		0.244061	1.85081	-0.252033
36891	0.466	0.1845	-0.0124		0.245113	1.85988	-0.252033
37091	0.472	0.1855	-0.0125		0.248269	1.86996	-0.254065
37293	0.476	0.1866	-0.0126		0.250373	1.88105	-0.256098
37494	0.482	0.1877	-0.0126		0.253529	1.89214	-0.256098
37694	0.484	0.1885	-0.0126		0.254581	1.9002	-0.256098
37895	0.49	0.1896	-0.0125		0.257737	1.91129	-0.254065
38095	0.494	0.1905	-0.0127		0.259841	1.92036	-0.25813
38295	0.496	0.1915	-0.0127		0.260892	1.93044	-0.25813
38496	0.5	0.1925	-0.0128		0.262996	1.94052	-0.260163
38696	0.506	0.1936	-0.0128		0.266152	1.95161	-0.260163
38897	0.512	0.1944	-0.0128		0.269308	1.95968	-0.260163
39097	0.514	0.1955	-0.0128		0.27036	1.97077	-0.260163
39297	0.522	0.1967	-0.0129		0.274568	1.98286	-0.262195
39498	0.528	0.1976	-0.0129		0.277724	1.99194	-0.262195
39698	0.53	0.1987	-0.0129		0.278776	2.00302	-0.262195
39899	0.532	0.2001	-0.013		0.279828	2.01714	-0.264228
40099	0.53	0.201	-0.0129		0.278776	2.02621	-0.262195
40299	0.528	0.2017	-0.0128		0.277724	2.03327	-0.260163
40500	0.534	0.2023	-0.0129		0.28088	2.03931	-0.262195
40700	0.54	0.2034	-0.013		0.284036	2.0504	-0.264228
40900	0.546	0.2044	-0.013		0.287192	2.06048	-0.264228
41101	0.554	0.2055	-0.0132		0.2914	2.07157	-0.268293
41301	0.554	0.2064	-0.0131		0.2914	2.08065	-0.26626
41503	0.562	0.2074	-0.0131		0.295608	2.09073	-0.26626
41704	0.57	0.2083	-0.0131		0.299816	2.0998	-0.26626
41904	0.574	0.2095	-0.0132		0.30192	2.1119	-0.268293
42105	0.58	0.2105	-0.0132		0.305076	2.12198	-0.268293
42305	0.588	0.2115	-0.0132		0.309284	2.13206	-0.268293
42505	0.59	0.2125	-0.0132		0.310336	2.14214	-0.268293
42706	0.6	0.2135	-0.0132		0.315596	2.15222	-0.268293
42906	0.604	0.2144	-0.0132		0.3177	2.16129	-0.268293
43107	0.61	0.2154	-0.0134		0.320856	2.17137	-0.272358
43307	0.618	0.2165	-0.0134		0.325064	2.18246	-0.272358
43507	0.624	0.2175	-0.0133		0.32822	2.19254	-0.270325
43708	0.63	0.2185	-0.0135		0.331376	2.20262	-0.27439
43908	0.634	0.2196	-0.0135		0.33348	2.21371	-0.27439
44108	0.642	0.2205	-0.0134		0.337687	2.22278	-0.272358
44309	0.646	0.2214	-0.0135		0.339791	2.23185	-0.27439
44509	0.65	0.2224	-0.0135		0.341895	2.24194	-0.27439
44711	0.658	0.2236	-0.0136		0.346103	2.25403	-0.276423
44912	0.664	0.2245	-0.0136		0.349259	2.2631	-0.276423
45112	0.672	0.2256	-0.0137		0.353467	2.27419	-0.278455
45313	0.676	0.2267	-0.0137		0.355571	2.28528	-0.278455
45513	0.684	0.2275	-0.0137		0.359779	2.29335	-0.278455
45713	0.692	0.2286	-0.0138		0.363987	2.30444	-0.280488
45914	0.698	0.2295	-0.0138		0.367143	2.31351	-0.280488
46114	0.702	0.2303	-0.0138		0.369247	2.32157	-0.280488
46315	0.706	0.2314	-0.0139		0.371351	2.33266	-0.28252
46515	0.718	0.2324	-0.0138		0.377663	2.34274	-0.280488
46715	0.724	0.2334	-0.0139		0.380819	2.35282	-0.28252
46916	0.732	0.2343	-0.0138		0.385027	2.3619	-0.280488
47116	0.742	0.2355	-0.0139		0.390287	2.37399	-0.28252
47316	0.748	0.2365	-0.014		0.393443	2.38407	-0.284553
47517	0.754	0.2375	-0.014		0.396599	2.39415	-0.284553
47717	0.762	0.2383	-0.014		0.400807	2.40222	-0.284553
47919	0.768	0.2394	-0.014		0.403963	2.41331	-0.284553
48120	0.778	0.2403	-0.014		0.409223	2.42238	-0.284553
48320	0.786	0.2415	-0.014		0.41343	2.43448	-0.284553
48521	0.794	0.2423	-0.0141		0.417638	2.44254	-0.286585
48721	0.8	0.2433	-0.0141		0.420794	2.45262	-0.286585
48921	0.81	0.2443	-0.0142		0.426054	2.4627	-0.288618
49122	0.816	0.2453	-0.0142		0.42921	2.47278	-0.288618
49322	0.826	0.2463	-0.0143		0.43447	2.48286	-0.29065
49523	0.832	0.2474	-0.0142		0.437626	2.49395	-0.288618
49723	0.842	0.2484	-0.0143		0.442886	2.50403	-0.29065
49923	0.852	0.2494	-0.0144		0.448146	2.51411	-0.292683
50124	0.86	0.2505	-0.0144		0.452354	2.5252	-0.292683
50324	0.868	0.2514	-0.0143		0.456562	2.53427	-0.29065
50524	0.876	0.2524	-0.0145		0.46077	2.54435	-0.294715
50725	0.884	0.2534	-0.0145		0.464978	2.55444	-0.294715
50925	0.892	0.2543	-0.0145		0.469186	2.56351	-0.294715
51127	0.898	0.2551	-0.0145		0.472342	2.57157	-0.294715
51328	0.908	0.2563	-0.0145		0.477602	2.58367	-0.294715
51528	0.918	0.2571	-0.0146		0.482862	2.59173	-0.296748
51729	0.93	0.2583	-0.0146		0.489173	2.60383	-0.296748
51929	0.94	0.2595	-0.0146		0.494433	2.61593	-0.296748
52129	0.95	0.2605	-0.0146		0.499693	2.62601	-0.296748
52330	0.956	0.2615	-0.0146		0.502849	2.63609	-0.296748
52530	0.966	0.2625	-0.0147		0.508109	2.64617	-0.29878
52731	0.974	0.2636	-0.0146		0.512317	2.65726	-0.296748
52931	0.98	0.2644	-0.0147		0.515473	2.66532	-0.29878
53131	0.99	0.2655	-0.0147		0.520733	2.67641	-0.29878
53332	1	0.2663	-0.0148		0.525993	2.68448	-0.300813
53532	1.012	0.2675	-0.0147		0.532305	2.69657	-0.29878
53732	1.02	0.2683	-0.0148		0.536513	2.70464	-0.300813
53933	1.03	0.2694	-0.0148		0.541773	2.71573	-0.300813
54133	1.044	0.2704	-0.0148		0.549137	2.72581	-0.300813
54335	1.048	0.2715	-0.0148		0.551241	2.7369	-0.300813
54536	1.06	0.2722	-0.0149		0.557553	2.74395	-0.302846
54736	1.068	0.2734	-0.0149		0.56176	2.75605	-0.302846
54937	1.08	0.2744	-0.015		0.568072	2.76613	-0.304878
55137	1.092	0.2754	-0.015		0.574384	2.77621	-0.304878
55337	1.102	0.2764	-0.015		0.579644	2.78629	-0.304878
55538	1.114	0.2773	-0.0151		0.585956	2.79536	-0.306911
55738	1.124	0.2783	-0.0151		0.591216	2.80544	-0.306911
55939	1.134	0.2794	-0.015		0.596476	2.81653	-0.304878
56139	1.148	0.2804	-0.0151		0.60384	2.82661	-0.306911
56339	1.158	0.2814	-0.0151		0.6091	2.83669	-0.306911
56540	1.166	0.2824	-0.015		0.613308	2.84677	-0.304878
56740	1.178	0.2834	-0.0151		0.61962	2.85685	-0.306911
56940	1.192	0.2843	-0.0151		0.626984	2.86593	-0.306911
57141	1.2	0.2854	-0.0151		0.631192	2.87702	-0.306911
57341	1.21	0.2864	-0.0152		0.636451	2.8871	-0.308943
57543	1.216	0.2877	-0.0152		0.639607	2.9002	-0.308943
57744	1.228	0.2886	-0.0152		0.645919	2.90927	-0.308943
57944	1.232	0.2896	-0.0153		0.648023	2.91935	-0.310976
58145	1.242	0.2905	-0.0152		0.653283	2.92843	-0.308943
58345	1.254	0.2913	-0.0152		0.659595	2.93649	-0.308943
58545	1.268	0.2924	-0.0152		0.666959	2.94758	-0.308943
58746	1.282	0.2934	-0.0152		0.674323	2.95766	-0.308943
58946	1.292	0.2945	-0.0153		0.679583	2.96875	-0.310976
59147	1.306	0.2955	-0.0153		0.686947	2.97883	-0.310976
59347	1.318	0.2965	-0.0153		0.693259	2.98891	-0.310976
59547	1.332	0.2974	-0.0154		0.700623	2.99798	-0.313008
59748	1.344	0.2984	-0.0154		0.706935	3.00806	-0.313008
59948	1.358	0.2994	-0.0154		0.714298	3.01815	-0.313008
60149	1.378	0.3006	-0.0154		0.724818	3.03024	-0.313008
60349	1.39	0.3019	-0.0155		0.73113	3.04335	-0.315041
60549	1.404	0.3028	-0.0155		0.738494	3.05242	-0.315041
60750	1.416	0.3039	-0.0155		0.744806	3.06351	-0.315041
60950	1.43	0.3047	-0.0155		0.75217	3.07157	-0.315041
61150	1.444	0.3057	-0.0155		0.759534	3.08165	-0.315041
61351	1.454	0.3066	-0.0155		0.764794	3.09073	-0.315041
61551	1.47	0.3077	-0.0155		0.77321	3.10181	-0.315041
61753	1.484	0.3087	-0.0155		0.780574	3.1119	-0.315041
61954	1.496	0.3097	-0.0156		0.786885	3.12198	-0.317073
62154	1.51	0.3105	-0.0156		0.794249	3.13004	-0.317073
62355	1.526	0.3116	-0.0156		0.802665	3.14113	-0.317073
62555	1.546	0.3125	-0.0156		0.813185	3.1502	-0.317073
62755	1.56	0.3134	-0.0156		0.820549	3.15927	-0.317073
62956	1.578	0.3145	-0.0156		0.830017	3.17036	-0.317073
63156	1.594	0.3154	-0.0157		0.838433	3.17944	-0.319106
63357	1.608	0.3167	-0.0157		0.845797	3.19254	-0.319106
63557	1.616	0.3177	-0.0157		0.850005	3.20262	-0.319106
63757	1.628	0.3188	-0.0158		0.856317	3.21371	-0.321138
63958	1.644	0.3198	-0.0158		0.864732	3.22379	-0.321138
64158	1.658	0.3207	-0.0158		0.872096	3.23286	-0.321138
64358	1.67	0.3217	-0.0158		0.878408	3.24294	-0.321138
64559	1.686	0.3227	-0.0159		0.886824	3.25302	-0.323171
64759	1.698	0.3237	-0.0158		0.893136	3.2631	-0.321138
64961	1.706	0.3246	-0.0158		0.897344	3.27218	-0.321138
65162	1.722	0.3256	-0.0159		0.90576	3.28226	-0.323171
65362	1.738	0.3265	-0.0159		0.914176	3.29133	-0.323171
65563	1.752	0.3275	-0.0159		0.92154	3.30141	-0.323171
65763	1.77	0.3285	-0.0159		0.931007	3.31149	-0.323171
65963	1.788	0.3296	-0.0159		0.940475	3.32258	-0.323171
66164	1.804	0.3306	-0.0159		0.948891	3.33266	-0.323171
66364	1.82	0.3316	-0.016		0.957307	3.34274	-0.325203
66565	1.836	0.3326	-0.016		0.965723	3.35282	-0.325203
66765	1.852	0.3335	-0.016		0.974139	3.3619	-0.325203
66965	1.87	0.3347	-0.016		0.983607	3.37399	-0.325203
67166	1.882	0.3354	-0.016		0.989919	3.38105	-0.325203
67366	1.9	0.3365	-0.016		0.999387	3.39214	-0.325203
67566	1.916	0.3374	-0.0161		1.0078	3.40121	-0.327236
67767	1.936	0.3386	-0.0161		1.01832	3.41331	-0.327236
67967	1.948	0.3395	-0.0161		1.02463	3.42238	-0.327236
68169	1.964	0.3406	-0.0162		1.03305	3.43347	-0.329268
68370	1.984	0.3414	-0.0163		1.04357	3.44153	-0.331301
68570	2.002	0.3426	-0.0162		1.05304	3.45363	-0.329268
68771	2.018	0.3435	-0.0162		1.06145	3.4627	-0.329268
68971	2.036	0.3444	-0.0163		1.07092	3.47177	-0.331301
69171	2.056	0.3455	-0.0163		1.08144	3.48286	-0.331301
69372	2.072	0.3465	-0.0162		1.08986	3.49294	-0.329268
69572	2.088	0.3475	-0.0163		1.09827	3.50302	-0.331301
69773	2.106	0.3484	-0.0163		1.10774	3.5121	-0.331301
69973	2.124	0.3494	-0.0163		1.11721	3.52218	-0.331301
70173	2.146	0.3504	-0.0165		1.12878	3.53226	-0.335366
70374	2.162	0.3515	-0.0164		1.1372	3.54335	-0.333333
70574	2.178	0.3524	-0.0164		1.14561	3.55242	-0.333333
70774	2.2	0.3533	-0.0164		1.15718	3.56149	-0.333333
70975	2.22	0.3543	-0.0164		1.1677	3.57157	-0.333333
71175	2.242	0.3554	-0.0164		1.17928	3.58266	-0.333333
71377	2.26	0.3565	-0.0166		1.18874	3.59375	-0.337398
71578	2.276	0.3575	-0.0166		1.19716	3.60383	-0.337398
71778	2.296	0.3584	-0.0166		1.20768	3.6129	-0.337398
71979	2.318	0.3596	-0.0166		1.21925	3.625	-0.337398
72179	2.332	0.3605	-0.0166		1.22662	3.63407	-0.337398
72379	2.352	0.3615	-0.0167		1.23714	3.64415	-0.339431
72580	2.372	0.3625	-0.0167		1.24766	3.65423	-0.339431
72780	2.388	0.3635	-0.0167		1.25607	3.66431	-0.339431
72981	2.408	0.3644	-0.0167		1.26659	3.67339	-0.339431
73181	2.43	0.3653	-0.0167		1.27816	3.68246	-0.339431
73381	2.45	0.3664	-0.0167		1.28868	3.69355	-0.339431
73582	2.472	0.3674	-0.0168		1.30025	3.70363	-0.341463
73782	2.492	0.3685	-0.0168		1.31077	3.71472	-0.341463
73982	2.51	0.3695	-0.0169		1.32024	3.7248	-0.343496
74183	2.528	0.3708	-0.0169		1.32971	3.7379	-0.343496
74383	2.542	0.3718	-0.0169		1.33707	3.74798	-0.343496
74585	2.56	0.3728	-0.0168		1.34654	3.75806	-0.341463
74786	2.578	0.3738	-0.0169		1.35601	3.76815	-0.343496
74986	2.592	0.3747	-0.0168		1.36337	3.77722	-0.341463
75187	2.61	0.3756	-0.0168		1.37284	3.78629	-0.341463
75387	2.628	0.3764	-0.0168		1.38231	3.79435	-0.341463
75587	2.65	0.3775	-0.0168		1.39388	3.80544	-0.341463
75788	2.672	0.3786	-0.0168		1.40545	3.81653	-0.341463
75988	2.696	0.3796	-0.0168		1.41808	3.82661	-0.341463
76189	2.714	0.3805	-0.0168		1.42754	3.83569	-0.341463
76389	2.736	0.3814	-0.0168		1.43912	3.84476	-0.341463
76589	2.758	0.3826	-0.017		1.45069	3.85685	-0.345528
76790	2.776	0.3835	-0.0169		1.46016	3.86593	-0.343496
76990	2.796	0.3844	-0.017		1.47068	3.875	-0.345528
77190	2.82	0.3855	-0.017		1.4833	3.88609	-0.345528
77391	2.844	0.3866	-0.017		1.49592	3.89718	-0.345528
77591	2.868	0.3875	-0.017		1.50855	3.90625	-0.345528
77793	2.886	0.3885	-0.017		1.51802	3.91633	-0.345528
77994	2.91	0.3896	-0.017		1.53064	3.92742	-0.345528
78194	2.932	0.3906	-0.017		1.54221	3.9375	-0.345528
78395	2.95	0.3914	-0.017		1.55168	3.94556	-0.345528
78595	2.97	0.3925	-0.017		1.5622	3.95665	-0.345528
78795	2.994	0.3936	-0.017		1.57482	3.96774	-0.345528
78996	3.014	0.3946	-0.0171		1.58534	3.97782	-0.347561
79196	3.036	0.3957	-0.017		1.59691	3.98891	-0.345528
79397	3.058	0.3966	-0.017		1.60849	3.99798	-0.345528
79597	3.078	0.3976	-0.017		1.61901	4.00806	-0.345528
79797	3.1	0.3985	-0.017		1.63058	4.01714	-0.345528
79998	3.126	0.3994	-0.017		1.64425	4.02621	-0.345528
80198	3.146	0.4005	-0.0172		1.65477	4.0373	-0.349593
80399	3.172	0.4014	-0.0172		1.66845	4.04637	-0.349593
80599	3.196	0.4024	-0.0173		1.68107	4.05645	-0.351626
80799	3.222	0.4036	-0.0173		1.69475	4.06855	-0.351626
81000	3.244	0.4045	-0.0171		1.70632	4.07762	-0.347561
81200	3.266	0.4055	-0.0171		1.71789	4.0877	-0.347561
81400	3.292	0.4066	-0.0172		1.73157	4.09879	-0.349593
81601	3.314	0.4077	-0.0173		1.74314	4.10988	-0.351626
81801	3.336	0.4087	-0.0173		1.75471	4.11996	-0.351626
82003	3.358	0.4096	-0.0171		1.76628	4.12903	-0.347561
82204	3.378	0.4106	-0.0171		1.7768	4.13911	-0.347561
82404	3.402	0.4116	-0.0172		1.78943	4.14919	-0.349593
82605	3.424	0.4126	-0.0171		1.801	4.15927	-0.347561
82805	3.45	0.4136	-0.0172		1.81468	4.16935	-0.349593
83005	3.47	0.4146	-0.0172		1.8252	4.17944	-0.349593
83206	3.492	0.4157	-0.0172		1.83677	4.19052	-0.349593
83406	3.51	0.4168	-0.0171		1.84624	4.20161	-0.347561
83607	3.53	0.4177	-0.0172		1.85676	4.21069	-0.349593
83807	3.554	0.4187	-0.0172		1.86938	4.22077	-0.349593
84007	3.574	0.4197	-0.0173		1.8799	4.23085	-0.351626
84208	3.596	0.421	-0.0173		1.89147	4.24395	-0.351626
84408	3.616	0.4217	-0.0173		1.90199	4.25101	-0.351626
84608	3.636	0.4227	-0.0173		1.91251	4.26109	-0.351626
84809	3.656	0.4237	-0.0172		1.92303	4.27117	-0.349593
85009	3.676	0.4247	-0.0173		1.93355	4.28125	-0.351626
85211	3.704	0.4255	-0.0173		1.94828	4.28931	-0.351626
85412	3.726	0.4265	-0.0174		1.95985	4.2994	-0.353659
85612	3.75	0.4274	-0.0174		1.97247	4.30847	-0.353659
85813	3.776	0.4284	-0.0173		1.98615	4.31855	-0.351626
86013	3.804	0.4293	-0.0174		2.00088	4.32762	-0.353659
86213	3.83	0.4304	-0.0175		2.01455	4.33871	-0.355691
86414	3.858	0.4315	-0.0174		2.02928	4.3498	-0.353659
86614	3.886	0.4323	-0.0174		2.04401	4.35786	-0.353659
86815	3.914	0.4335	-0.0173		2.05874	4.36996	-0.351626
87015	3.938	0.4345	-0.0174		2.07136	4.38004	-0.353659
87215	3.966	0.4355	-0.0175		2.08609	4.39012	-0.355691
87416	3.988	0.4365	-0.0174		2.09766	4.4002	-0.353659
87616	4.01	0.4377	-0.0174		2.10923	4.4123	-0.353659
87816	4.034	0.4386	-0.0175		2.12186	4.42137	-0.355691
88017	4.06	0.4396	-0.0175		2.13553	4.43145	-0.355691
88217	4.082	0.4406	-0.0175		2.1471	4.44153	-0.355691
88419	4.104	0.4418	-0.0174		2.15868	4.45363	-0.353659
88620	4.128	0.4426	-0.0174		2.1713	4.46169	-0.353659
88820	4.152	0.4437	-0.0174		2.18392	4.47278	-0.353659
89021	4.182	0.4446	-0.0174		2.1997	4.48185	-0.353659
89221	4.206	0.4457	-0.0175		2.21233	4.49294	-0.355691
89421	4.228	0.4467	-0.0174		2.2239	4.50302	-0.353659
89622	4.25	0.4477	-0.0175		2.23547	4.5131	-0.355691
89822	4.274	0.4484	-0.0175		2.24809	4.52016	-0.355691
90023	4.304	0.4495	-0.0174		2.26387	4.53125	-0.353659
90223	4.332	0.4506	-0.0174		2.2786	4.54234	-0.353659
90423	4.358	0.4515	-0.0174		2.29228	4.55141	-0.353659
90624	4.388	0.4524	-0.0174		2.30806	4.56048	-0.353659
90824	4.418	0.4533	-0.0174		2.32384	4.56956	-0.353659
91024	4.452	0.4544	-0.0174		2.34172	4.58065	-0.353659
91225	4.478	0.4554	-0.0174		2.3554	4.59073	-0.353659
91425	4.506	0.4565	-0.0174		2.37012	4.60181	-0.353659
91627	4.536	0.4575	-0.0174		2.3859	4.6119	-0.353659
91828	4.564	0.4585	-0.0175		2.40063	4.62198	-0.355691
92028	4.594	0.4594	-0.0174		2.41641	4.63105	-0.353659
92229	4.622	0.4606	-0.0174		2.43114	4.64315	-0.353659
92429	4.646	0.4616	-0.0174		2.44376	4.65323	-0.353659
92629	4.676	0.4626	-0.0174		2.45954	4.66331	-0.353659
92830	4.706	0.4636	-0.0174		2.47532	4.67339	-0.353659
93030	4.73	0.4648	-0.0174		2.48795	4.68548	-0.353659
93231	4.756	0.4657	-0.0174		2.50162	4.69456	-0.353659
93431	4.784	0.4666	-0.0174		2.51635	4.70363	-0.353659
93631	4.812	0.4677	-0.0174		2.53108	4.71472	-0.353659
93832	4.838	0.4686	-0.0174		2.54475	4.72379	-0.353659
94032	4.864	0.4696	-0.0173		2.55843	4.73387	-0.351626
94232	4.894	0.4706	-0.0174		2.57421	4.74395	-0.353659
94433	4.92	0.4716	-0.0173		2.58789	4.75403	-0.351626
94633	4.948	0.4727	-0.0174		2.60261	4.76512	-0.353659
94835	4.98	0.4736	-0.0173		2.61944	4.77419	-0.351626
95036	5.006	0.4745	-0.0174		2.63312	4.78327	-0.353659
95236	5.036	0.4755	-0.0173		2.6489	4.79335	-0.351626
95437	5.068	0.4765	-0.0173		2.66573	4.80343	-0.351626
95637	5.094	0.4776	-0.0174		2.67941	4.81452	-0.353659
95837	5.124	0.4785	-0.0173		2.69519	4.82359	-0.351626
96038	5.156	0.4795	-0.0173		2.71202	4.83367	-0.351626
96238	5.186	0.4806	-0.0173		2.7278	4.84476	-0.351626
96439	5.22	0.4816	-0.0172		2.74568	4.85484	-0.349593
96639	5.248	0.4826	-0.0173		2.76041	4.86492	-0.351626
96839	5.28	0.4836	-0.0171		2.77724	4.875	-0.347561
97040	5.314	0.4847	-0.0172		2.79513	4.88609	-0.349593
97240	5.342	0.4857	-0.0172		2.80985	4.89617	-0.349593
97440	5.374	0.4867	-0.0172		2.82669	4.90625	-0.349593
97641	5.402	0.4877	-0.0171		2.84141	4.91633	-0.347561
97841	5.43	0.4888	-0.0171		2.85614	4.92742	-0.347561
98043	5.456	0.4897	-0.0171		2.86982	4.93649	-0.347561
98244	5.484	0.4907	-0.0171		2.88455	4.94657	-0.347561
98444	5.514	0.4916	-0.0171		2.90033	4.95565	-0.347561
98645	5.546	0.4926	-0.0171		2.91716	4.96573	-0.347561
98845	5.576	0.4936	-0.017		2.93294	4.97581	-0.345528
99045	5.606	0.4947	-0.017		2.94872	4.9869	-0.345528
99246	5.64	0.4956	-0.0169		2.9666	4.99597	-0.343496
99446	5.672	0.4965	-0.0169		2.98343	5.00504	-0.343496
99647	5.708	0.4977	-0.0169		3.00237	5.01714	-0.343496
99847	5.742	0.4987	-0.0168		3.02025	5.02722	-0.341463
100047	5.776	0.4997	-0.0168		3.03814	5.0373	-0.341463
100248	5.802	0.5007	-0.0167		3.05181	5.04738	-0.339431
100448	5.834	0.5017	-0.0168		3.06864	5.05746	-0.341463
100649	5.864	0.5026	-0.0167		3.08442	5.06653	-0.339431
100849	5.892	0.5039	-0.0167		3.09915	5.07964	-0.339431
101049	5.92	0.5047	-0.0167		3.11388	5.0877	-0.339431
101250	5.954	0.5057	-0.0167		3.13176	5.09778	-0.339431
101450	5.98	0.5068	-0.0165		3.14544	5.10887	-0.335366
101650	6.01	0.5079	-0.0165		3.16122	5.11996	-0.335366
101851	6.036	0.5087	-0.0165		3.17489	5.12802	-0.335366
102051	6.066	0.5097	-0.0165		3.19067	5.1381	-0.335366
102253	6.098	0.5107	-0.0165		3.2075	5.14819	-0.335366
102454	6.13	0.5115	-0.0164		3.22434	5.15625	-0.333333
102654	6.162	0.5127	-0.0163		3.24117	5.16835	-0.331301
102855	6.192	0.5136	-0.0164		3.25695	5.17742	-0.333333
103055	6.226	0.5145	-0.0163		3.27483	5.18649	-0.331301
103255	6.256	0.5154	-0.0163		3.29061	5.19556	-0.331301
103456	6.284	0.5163	-0.0162		3.30534	5.20464	-0.329268
103656	6.314	0.5174	-0.0161		3.32112	5.21573	-0.327236
103857	6.352	0.5184	-0.016		3.34111	5.22581	-0.325203
104057	6.384	0.5194	-0.0159		3.35794	5.23589	-0.323171
104257	6.42	0.5205	-0.0159		3.37687	5.24698	-0.323171
104458	6.454	0.5213	-0.0159		3.39476	5.25504	-0.323171
104658	6.49	0.5224	-0.0158		3.41369	5.26613	-0.321138
104858	6.53	0.5235	-0.0157		3.43473	5.27722	-0.319106
105059	6.564	0.5244	-0.0157		3.45262	5.28629	-0.319106
105259	6.598	0.5254	-0.0156		3.4705	5.29637	-0.317073
105461	6.634	0.5265	-0.0155		3.48944	5.30746	-0.315041
105662	6.67	0.5277	-0.0154		3.50837	5.31956	-0.313008
105862	6.708	0.5287	-0.0154		3.52836	5.32964	-0.313008
106063	6.74	0.5297	-0.0153		3.54519	5.33972	-0.310976
106263	6.774	0.5307	-0.0152		3.56308	5.3498	-0.308943
106463	6.81	0.5317	-0.0151		3.58201	5.35988	-0.306911
106664	6.844	0.5328	-0.015		3.5999	5.37097	-0.304878
106864	6.882	0.5337	-0.0149		3.61988	5.38004	-0.302846
107065	6.916	0.5348	-0.0148		3.63777	5.39113	-0.300813
107265	6.952	0.5358	-0.0148		3.6567	5.40121	-0.300813
107465	6.982	0.5369	-0.0147		3.67248	5.4123	-0.29878
107666	7.012	0.538	-0.0147		3.68826	5.42339	-0.29878
107866	7.046	0.5388	-0.0145		3.70615	5.43145	-0.294715
108066	7.078	0.5398	-0.0145		3.72298	5.44153	-0.294715
108267	7.11	0.5409	-0.0143		3.73981	5.45262	-0.29065
108467	7.146	0.5418	-0.0143		3.75875	5.46169	-0.29065
108669	7.176	0.5428	-0.014		3.77453	5.47177	-0.284553
108870	7.208	0.5438	-0.014		3.79136	5.48185	-0.284553
109070	7.244	0.5448	-0.014		3.81029	5.49194	-0.284553
109271	7.28	0.5457	-0.0138		3.82923	5.50101	-0.280488
109471	7.318	0.5468	-0.0137		3.84922	5.5121	-0.278455
109671	7.354	0.5478	-0.0136		3.86815	5.52218	-0.276423
109872	7.386	0.5489	-0.0135		3.88498	5.53327	-0.27439
110072	7.416	0.5498	-0.0134		3.90076	5.54234	-0.272358
110273	7.448	0.5508	-0.0134		3.9176	5.55242	-0.272358
110473	7.486	0.5518	-0.0132		3.93758	5.5625	-0.268293
110673	7.518	0.5527	-0.013		3.95441	5.57157	-0.264228
110874	7.552	0.5537	-0.013		3.9723	5.58165	-0.264228
111074	7.59	0.5548	-0.0128		3.99229	5.59274	-0.260163
111274	7.626	0.5559	-0.0127		4.01122	5.60383	-0.25813
111475	7.664	0.5568	-0.0126		4.03121	5.6129	-0.256098
111675	7.702	0.5578	-0.0125		4.0512	5.62298	-0.254065
111877	7.738	0.5587	-0.0124		4.07013	5.63206	-0.252033
112078	7.774	0.5597	-0.0123		4.08907	5.64214	-0.25
112278	7.81	0.5608	-0.0122		4.108	5.65323	-0.247967
112479	7.846	0.5617	-0.012		4.12694	5.6623	-0.243902
112679	7.878	0.5627	-0.0119		4.14377	5.67238	-0.24187
112879	7.914	0.5638	-0.0118		4.16271	5.68347	-0.239837
113080	7.948	0.5647	-0.0117		4.18059	5.69254	-0.237805
113280	7.984	0.5657	-0.0116		4.19953	5.70262	-0.235772
113481	8.016	0.5666	-0.0115		4.21636	5.71169	-0.23374
113681	8.052	0.5676	-0.0114		4.2353	5.72177	-0.231707
113881	8.094	0.5686	-0.0112		4.25739	5.73185	-0.227642
114082	8.132	0.5696	-0.0111		4.27737	5.74194	-0.22561
114282	8.174	0.5705	-0.0109		4.29947	5.75101	-0.221545
114482	8.214	0.5715	-0.0108		4.32051	5.76109	-0.219512
114683	8.254	0.5726	-0.0107		4.34155	5.77218	-0.21748
114883	8.296	0.5736	-0.0106		4.36364	5.78226	-0.215447
115085	8.332	0.5748	-0.0104		4.38257	5.79435	-0.211382
115286	8.37	0.5757	-0.0102		4.40256	5.80343	-0.207317
115486	8.412	0.5768	-0.0102		4.42465	5.81452	-0.207317
115687	8.448	0.5779	-0.01		4.44359	5.8256	-0.203252
115887	8.482	0.5788	-0.0099		4.46147	5.83468	-0.20122
116087	8.516	0.5797	-0.0097		4.47936	5.84375	-0.197154
116288	8.554	0.5807	-0.0096		4.49934	5.85383	-0.195122
116488	8.59	0.5817	-0.0095		4.51828	5.86391	-0.193089
116689	8.62	0.5827	-0.0094		4.53406	5.87399	-0.191057
116889	8.654	0.5839	-0.0093		4.55194	5.88609	-0.189024
117089	8.69	0.5847	-0.0092		4.57088	5.89415	-0.186992
117290	8.726	0.5858	-0.0091		4.58981	5.90524	-0.184959
117490	8.76	0.5866	-0.0088		4.6077	5.91331	-0.178862
117690	8.804	0.5876	-0.0088		4.63084	5.92339	-0.178862
117891	8.856	0.5888	-0.0086		4.65819	5.93548	-0.174797
118091	8.902	0.5898	-0.0084		4.68239	5.94556	-0.170732
118293	8.944	0.591	-0.0082		4.70448	5.95766	-0.166667
118494	8.984	0.5921	-0.0081		4.72552	5.96875	-0.164634
118694	9.018	0.593	-0.008		4.7434	5.97782	-0.162602
118895	9.056	0.5941	-0.0078		4.76339	5.98891	-0.158537
119095	9.086	0.5951	-0.0077		4.77917	5.99899	-0.156504
119295	9.118	0.5961	-0.0076		4.796	6.00907	-0.154472
119496	9.15	0.5972	-0.0074		4.81284	6.02016	-0.150407
119696	9.184	0.5981	-0.0074		4.83072	6.02923	-0.150407
119897	9.22	0.599	-0.0073		4.84965	6.03831	-0.148374
120097	9.256	0.6	-0.0071		4.86859	6.04839	-0.144309
120297	9.288	0.6011	-0.007		4.88542	6.05948	-0.142276
120498	9.324	0.602	-0.0068		4.90436	6.06855	-0.138211
120698	9.362	0.6029	-0.0066		4.92435	6.07762	-0.134146
120899	9.394	0.604	-0.0065		4.94118	6.08871	-0.132114
121099	9.43	0.605	-0.0064		4.96011	6.09879	-0.130081
121299	9.466	0.606	-0.0063		4.97905	6.10887	-0.128049
121500	9.506	0.607	-0.0061		5.00009	6.11895	-0.123984
121700	9.542	0.608	-0.006		5.01902	6.12903	-0.121951
121900	9.576	0.6089	-0.0058		5.03691	6.1381	-0.117886
122101	9.61	0.6099	-0.0057		5.05479	6.14819	-0.115854
122301	9.644	0.6108	-0.0056		5.07268	6.15726	-0.113821
122503	9.674	0.6119	-0.0054		5.08846	6.16835	-0.109756
122704	9.704	0.6128	-0.0054		5.10424	6.17742	-0.109756
122904	9.734	0.6138	-0.0053		5.12002	6.1875	-0.107724
123105	9.768	0.6148	-0.0052		5.1379	6.19758	-0.105691
123305	9.802	0.6158	-0.005		5.15578	6.20766	-0.101626
123505	9.84	0.6167	-0.0048		5.17577	6.21673	-0.097561
123706	9.872	0.6177	-0.0048		5.1926	6.22681	-0.097561
123906	9.906	0.6186	-0.0046		5.21049	6.23589	-0.0934959
124107	9.942	0.6197	-0.0044		5.22942	6.24698	-0.0894309
124307	9.982	0.6208	-0.0044		5.25046	6.25806	-0.0894309
124507	10.018	0.6216	-0.0042		5.2694	6.26613	-0.0853659
124708	10.058	0.6226	-0.0041		5.29044	6.27621	-0.0833333
124908	10.094	0.6235	-0.004		5.30937	6.28528	-0.0813008
125108	10.14	0.6247	-0.0038		5.33357	6.29738	-0.0772358
125309	10.188	0.6258	-0.0036		5.35882	6.30847	-0.0731707
125509	10.224	0.6269	-0.0034		5.37775	6.31956	-0.0691057
125711	10.266	0.628	-0.0034		5.39984	6.33065	-0.0691057
125912	10.304	0.6291	-0.0032		5.41983	6.34173	-0.0650407
126112	10.336	0.6301	-0.003		5.43666	6.35181	-0.0609756
126313	10.368	0.6309	-0.0029		5.45349	6.35988	-0.0589431
126513	10.404	0.632	-0.0028		5.47243	6.37097	-0.0569106
126713	10.44	0.6331	-0.0026		5.49137	6.38206	-0.0528455
126914	10.47	0.634	-0.0025		5.50715	6.39113	-0.050813
127114	10.502	0.635	-0.0024		5.52398	6.40121	-0.0487805
127315	10.54	0.636	-0.0023		5.54397	6.41129	-0.046748
127515	10.576	0.637	-0.0021		5.5629	6.42137	-0.0426829
127715	10.61	0.638	-0.002		5.58079	6.43145	-0.0406504
127916	10.642	0.6389	-0.0019		5.59762	6.44052	-0.0386179
128116	10.682	0.6399	-0.0016		5.61866	6.4506	-0.0325203
128316	10.718	0.6409	-0.0016		5.63759	6.46069	-0.0325203
128517	10.758	0.642	-0.0014		5.65863	6.47177	-0.0284553
128717	10.79	0.6428	-0.0012		5.67546	6.47984	-0.0243902
128919	10.822	0.6439	-0.0012		5.6923	6.49093	-0.0243902
129120	10.856	0.6448	-0.001		5.71018	6.5	-0.0203252
129320	10.896	0.6458	-0.0009		5.73122	6.51008	-0.0182927
129521	10.936	0.6468	-0.0007		5.75226	6.52016	-0.0142276
129721	10.974	0.6478	-0.0007		5.77225	6.53024	-0.0142276
129921	11.006	0.6488	-0.0005		5.78908	6.54032	-0.0101626
130122	11.044	0.6498	-0.0004		5.80907	6.5504	-0.00813008
130322	11.074	0.6508	-0.0002		5.82485	6.56048	-0.00406504
130523	11.114	0.6517	-0.0001		5.84589	6.56956	-0.00203252
130723	11.15	0.6527	0.0002		5.86482	6.57964	0.00406504
130923	11.192	0.6537	0.0002		5.88691	6.58972	0.00406504
131124	11.228	0.6548	0.0003		5.90585	6.60081	0.00609756
131324	11.266	0.6556	0.0005		5.92584	6.60887	0.0101626
131524	11.304	0.6567	0.0006		5.94582	6.61996	0.0121951
131725	11.344	0.6576	0.0008		5.96686	6.62903	0.0162602
131925	11.382	0.6588	0.0009		5.98685	6.64113	0.0182927
132127	11.42	0.6598	0.001		6.00684	6.65121	0.0203252
132328	11.456	0.6608	0.0012		6.02578	6.66129	0.0243902
132528	11.488	0.6616	0.0013		6.04261	6.66935	0.0264228
132729	11.528	0.6627	0.0013		6.06365	6.68044	0.0264228
132929	11.562	0.6636	0.0016		6.08153	6.68952	0.0325203
133129	11.6	0.6646	0.0017		6.10152	6.6996	0.0345528
133330	11.64	0.6657	0.0018		6.12256	6.71069	0.0365854
133530	11.676	0.6665	0.002		6.14149	6.71875	0.0406504
133731	11.716	0.6676	0.0021		6.16253	6.72984	0.0426829
133931	11.752	0.6687	0.0022		6.18147	6.74093	0.0447154
134131	11.786	0.6696	0.0024		6.19935	6.75	0.0487805
134332	11.822	0.6707	0.0025		6.21829	6.76109	0.050813
134532	11.862	0.6715	0.0027		6.23933	6.76915	0.054878
134732	11.9	0.6724	0.0028		6.25932	6.77823	0.0569106
134933	11.94	0.6735	0.0029		6.28036	6.78931	0.0589431
135133	11.986	0.6745	0.003		6.30455	6.7994	0.0609756
135335	12.032	0.6756	0.0032		6.32875	6.81048	0.0650407
135536	12.076	0.6768	0.0034		6.35189	6.82258	0.0691057
135736	12.112	0.6777	0.0035		6.37083	6.83165	0.0711382
135937	12.152	0.6788	0.0036		6.39187	6.84274	0.0731707
136137	12.19	0.6798	0.0039		6.41185	6.85282	0.0792683
136337	12.23	0.6808	0.004		6.43289	6.8629	0.0813008
136538	12.274	0.6819	0.0042		6.45604	6.87399	0.0853659
136738	12.316	0.6828	0.0044		6.47813	6.88306	0.0894309
136939	12.354	0.6838	0.0045		6.49812	6.89315	0.0914634
137139	12.39	0.6849	0.0046		6.51705	6.90423	0.0934959
137339	12.432	0.6859	0.0048		6.53914	6.91431	0.097561
137540	12.462	0.687	0.0049		6.55492	6.9254	0.0995935
137740	12.496	0.688	0.005		6.57281	6.93548	0.101626
137940	12.532	0.6889	0.0052		6.59174	6.94456	0.105691
138141	12.566	0.6899	0.0053		6.60963	6.95464	0.107724
138341	12.604	0.6909	0.0054		6.62961	6.96472	0.109756
138543	12.644	0.6919	0.0055		6.65065	6.9748	0.111789
138744	12.684	0.6929	0.0058		6.67169	6.98488	0.117886
138944	12.712	0.6938	0.0059		6.68642	6.99395	0.119919
139145	12.752	0.6948	0.006		6.70746	7.00403	0.121951
139345	12.784	0.6958	0.0061		6.72429	7.01411	0.123984
139545	12.822	0.6968	0.0063		6.74428	7.02419	0.128049
139746	12.858	0.6976	0.0064		6.76322	7.03226	0.130081
139946	12.898	0.6987	0.0065		6.78426	7.04335	0.132114
140147	12.938	0.6998	0.0068		6.8053	7.05444	0.138211
140347	12.976	0.7008	0.0069		6.82528	7.06452	0.140244
140547	13.016	0.7017	0.007		6.84632	7.07359	0.142276
140748	13.054	0.7028	0.0071		6.86631	7.08468	0.144309
140948	13.09	0.7037	0.0072		6.88525	7.09375	0.146341
141149	13.13	0.7047	0.0074		6.90629	7.10383	0.150407
141349	13.172	0.7055	0.0075		6.92838	7.1119	0.152439
141549	13.216	0.7066	0.0077		6.95152	7.12298	0.156504
141750	13.258	0.7077	0.0079		6.97361	7.13407	0.160569
141950	13.302	0.7086	0.008		6.99676	7.14315	0.162602
142150	13.344	0.7097	0.0082		7.01885	7.15423	0.166667
142351	13.388	0.7108	0.0083		7.04199	7.16532	0.168699
142551	13.428	0.7117	0.0085		7.06303	7.1744	0.172764
142753	13.466	0.7127	0.0086		7.08302	7.18448	0.174797
142954	13.504	0.7138	0.0087		7.10301	7.19556	0.176829
143154	13.546	0.7148	0.0089		7.1251	7.20565	0.180894
143355	13.586	0.7159	0.0091		7.14614	7.21673	0.184959
143555	13.626	0.7169	0.0092		7.16718	7.22681	0.186992
143755	13.668	0.7181	0.0094		7.18927	7.23891	0.191057
143956	13.71	0.7189	0.0095		7.21136	7.24698	0.193089
144156	13.75	0.7199	0.0096		7.2324	7.25706	0.195122
144357	13.794	0.721	0.0098		7.25555	7.26815	0.199187
144557	13.834	0.7219	0.0099		7.27659	7.27722	0.20122
144757	13.866	0.7229	0.01		7.29342	7.2873	0.203252
144958	13.906	0.7239	0.0102		7.31446	7.29738	0.207317
145158	13.938	0.7249	0.0104		7.33129	7.30746	0.211382
145358	13.978	0.726	0.0105		7.35233	7.31855	0.213415
145559	14.018	0.727	0.0106		7.37337	7.32863	0.215447
145759	14.054	0.7279	0.0107		7.3923	7.3377	0.21748
145961	14.096	0.729	0.0108		7.4144	7.34879	0.219512
146162	14.136	0.7301	0.011		7.43544	7.35988	0.223577
146362	14.174	0.731	0.0113		7.45542	7.36895	0.229675
146563	14.212	0.732	0.0113		7.47541	7.37903	0.229675
146763	14.25	0.733	0.0114		7.4954	7.38911	0.231707
146963	14.292	0.734	0.0116		7.51749	7.39919	0.235772
147164	14.326	0.735	0.0117		7.53537	7.40927	0.237805
147364	14.364	0.7359	0.0118		7.55536	7.41835	0.239837
147565	14.404	0.7367	0.0119		7.5764	7.42641	0.24187
147765	14.444	0.7378	0.0122		7.59744	7.4375	0.247967
147965	14.488	0.7388	0.0123		7.62059	7.44758	0.25
148166	14.524	0.7399	0.0124		7.63952	7.45867	0.252033
148366	14.568	0.7409	0.0126		7.66267	7.46875	0.256098
148566	14.606	0.7418	0.0128		7.68265	7.47782	0.260163
148767	14.646	0.7428	0.0128		7.70369	7.4879	0.260163
148967	14.686	0.7438	0.013		7.72473	7.49798	0.264228
149169	14.726	0.7448	0.0132		7.74577	7.50806	0.268293
149370	14.764	0.7459	0.0133		7.76576	7.51915	0.270325
149570	14.802	0.7469	0.0134		7.78575	7.52923	0.272358
149771	14.838	0.7477	0.0136		7.80468	7.5373	0.276423
149971	14.872	0.7488	0.0138		7.82257	7.54839	0.280488
150171	14.914	0.7499	0.0139		7.84466	7.55948	0.28252
150372	14.952	0.7508	0.014		7.86465	7.56855	0.284553
150572	14.99	0.7519	0.0142		7.88463	7.57964	0.288618
150773	15.034	0.7527	0.0143		7.90778	7.5877	0.29065
150973	15.082	0.7537	0.0145		7.93303	7.59778	0.294715
151173	15.13	0.7548	0.0146		7.95827	7.60887	0.296748
151374	15.172	0.756	0.0148		7.98036	7.62097	0.300813
151574	15.216	0.757	0.015		8.00351	7.63105	0.304878
151774	15.258	0.7582	0.015		8.0256	7.64315	0.304878
151975	15.294	0.7591	0.0152		8.04454	7.65222	0.308943
152175	15.332	0.7601	0.0153		8.06452	7.6623	0.310976
152377	15.37	0.7611	0.0155		8.08451	7.67238	0.315041
152578	15.41	0.762	0.0156		8.10555	7.68145	0.317073
152778	15.446	0.7631	0.0158		8.12449	7.69254	0.321138
152979	15.486	0.7641	0.0158		8.14553	7.70262	0.321138
153179	15.52	0.7651	0.016		8.16341	7.7127	0.325203
153379	15.558	0.7661	0.0162		8.1834	7.72278	0.329268
153580	15.594	0.7671	0.0164		8.20233	7.73286	0.333333
153780	15.632	0.7679	0.0165		8.22232	7.74093	0.335366
153981	15.668	0.769	0.0166		8.24126	7.75202	0.337398
154181	15.714	0.77	0.0167		8.26545	7.7621	0.339431
154381	15.752	0.771	0.0169		8.28544	7.77218	0.343496
154582	15.792	0.772	0.017		8.30648	7.78226	0.345528
154782	15.83	0.773	0.0172		8.32647	7.79234	0.349593
154982	15.874	0.774	0.0174		8.34961	7.80242	0.353659
155183	15.912	0.7749	0.0176		8.3696	7.81149	0.357724
155383	15.948	0.7759	0.0177		8.38854	7.82157	0.359756
155585	15.988	0.777	0.0177		8.40958	7.83266	0.359756
155786	16.03	0.778	0.0179		8.43167	7.84274	0.363821
155986	16.068	0.779	0.0181		8.45165	7.85282	0.367886
156187	16.108	0.7799	0.0182		8.47269	7.8619	0.369919
156387	16.144	0.781	0.0184		8.49163	7.87298	0.373984
156587	16.186	0.7819	0.0185		8.51372	7.88206	0.376016
156788	16.23	0.783	0.0187		8.53687	7.89315	0.380081
156988	16.266	0.7838	0.0189		8.5558	7.90121	0.384146
157189	16.308	0.7849	0.019		8.57789	7.9123	0.386179
157389	16.346	0.7859	0.0191		8.59788	7.92238	0.388211
157589	16.384	0.7868	0.0192		8.61787	7.93145	0.390244
157790	16.426	0.7878	0.0194		8.63996	7.94153	0.394309
157990	16.464	0.7888	0.0195		8.65995	7.95161	0.396341
158190	16.5	0.7898	0.0197		8.67888	7.96169	0.400407
158391	16.538	0.7908	0.0198		8.69887	7.97177	0.402439
158591	16.58	0.7917	0.0199		8.72096	7.98085	0.404472
158793	16.618	0.7929	0.0201		8.74095	7.99294	0.408537
158994	16.658	0.7939	0.0202		8.76199	8.00302	0.410569
159194	16.698	0.7949	0.0204		8.78303	8.0131	0.414634
159395	16.742	0.7959	0.0205		8.80617	8.02319	0.416667
159595	16.778	0.7969	0.0206		8.82511	8.03327	0.418699
159795	16.824	0.7979	0.0208		8.84931	8.04335	0.422764
159996	16.874	0.7989	0.0209		8.8756	8.05343	0.424797
160196	16.922	0.8	0.0211		8.90085	8.06452	0.428862
160397	16.966	0.8009	0.0213		8.924	8.07359	0.432927
160597	17.01	0.8021	0.0214		8.94714	8.08569	0.434959
160797	17.044	0.8032	0.0216		8.96502	8.09677	0.439024
160998	17.082	0.8041	0.0217		8.98501	8.10585	0.441057
161198	17.122	0.805	0.0218		9.00605	8.11492	0.443089
161399	17.162	0.806	0.022		9.02709	8.125	0.447154
161599	17.194	0.8071	0.0221		9.04392	8.13609	0.449187
161799	17.236	0.808	0.0223		9.06601	8.14516	0.453252
162000	17.27	0.809	0.0224		9.0839	8.15524	0.455285
162200	17.312	0.81	0.0225		9.10599	8.16532	0.457317
162400	17.354	0.811	0.0227		9.12808	8.1754	0.461382
162601	17.388	0.812	0.0229		9.14597	8.18548	0.465447
162801	17.428	0.813	0.023		9.167	8.19556	0.46748
163003	17.468	0.814	0.0231		9.18804	8.20565	0.469512
163204	17.508	0.8149	0.0233		9.20908	8.21472	0.473577
163404	17.55	0.8161	0.0234		9.23118	8.22681	0.47561
163605	17.58	0.817	0.0236		9.24696	8.23589	0.479675
163805	17.624	0.8179	0.0237		9.2701	8.24496	0.481707
164005	17.676	0.8191	0.0239		9.29745	8.25706	0.485772
164206	17.73	0.8201	0.024		9.32585	8.26714	0.487805
164406	17.776	0.8212	0.0242		9.35005	8.27823	0.49187
164607	17.814	0.8223	0.0244		9.37004	8.28931	0.495935
164807	17.848	0.8235	0.0245		9.38792	8.30141	0.497967
165007	17.882	0.8243	0.0247		9.40581	8.30948	0.502033
165208	17.914	0.8253	0.0248		9.42264	8.31956	0.504065
165408	17.946	0.8263	0.0249		9.43947	8.32964	0.506098
165608	17.982	0.8272	0.025		9.45841	8.33871	0.50813
165809	18.022	0.8282	0.0252		9.47944	8.34879	0.512195
166009	18.062	0.829	0.0253		9.50048	8.35685	0.514228
166211	18.102	0.8302	0.0254		9.52152	8.36895	0.51626
166412	18.142	0.8311	0.0256		9.54256	8.37802	0.520325
166612	18.176	0.8321	0.0258		9.56045	8.3881	0.52439
166813	18.216	0.8331	0.0259		9.58149	8.39819	0.526423
167013	18.254	0.8341	0.026		9.60148	8.40827	0.528455
167213	18.292	0.8351	0.0262		9.62146	8.41835	0.53252
167414	18.332	0.8361	0.0263		9.6425	8.42843	0.534553
167614	18.368	0.8369	0.0265		9.66144	8.43649	0.538618
167815	18.406	0.8379	0.0266		9.68143	8.44657	0.54065
168015	18.442	0.8391	0.0267		9.70036	8.45867	0.542683
168215	18.48	0.84	0.0269		9.72035	8.46774	0.546748
168416	18.528	0.8411	0.0271		9.7456	8.47883	0.550813
168616	18.568	0.8419	0.0271		9.76664	8.4869	0.550813
168816	18.608	0.8429	0.0273		9.78768	8.49698	0.554878
169017	18.642	0.844	0.0274		9.80556	8.50806	0.556911
169217	18.688	0.845	0.0276		9.82976	8.51815	0.560976
169419	18.728	0.846	0.0277		9.8508	8.52823	0.563008
169620	18.77	0.8468	0.0279		9.87289	8.53629	0.567073
169820	18.816	0.8479	0.028		9.89708	8.54738	0.569106
170021	18.85	0.8489	0.0282		9.91497	8.55746	0.573171
170221	18.892	0.8498	0.0284		9.93706	8.56653	0.577236
170421	18.93	0.851	0.0285		9.95705	8.57863	0.579268
170622	18.982	0.8519	0.0287		9.9844	8.5877	0.583333
170822	19.038	0.8531	0.0288		10.0139	8.5998	0.585366
171023	19.082	0.8541	0.029		10.037	8.60988	0.589431
171223	19.126	0.8551	0.0291		10.0601	8.61996	0.591463
171423	19.164	0.8563	0.0293		10.0801	8.63206	0.595528
171624	19.2	0.8572	0.0295		10.0991	8.64113	0.599593
171824	19.24	0.8583	0.0296		10.1201	8.65222	0.601626
172024	19.268	0.8592	0.0297		10.1348	8.66129	0.603659
172225	19.312	0.8603	0.0299		10.158	8.67238	0.607724
172425	19.346	0.8612	0.03		10.1759	8.68145	0.609756
172627	19.384	0.862	0.0301		10.1958	8.68952	0.611789
172828	19.426	0.8631	0.0303		10.2179	8.7006	0.615854
173028	19.472	0.8642	0.0305		10.2421	8.71169	0.619919
173229	19.506	0.8652	0.0306		10.26	8.72177	0.621951
173429	19.544	0.8663	0.0308		10.28	8.73286	0.626016
173629	19.578	0.867	0.0309		10.2979	8.73992	0.628049
173830	19.62	0.8681	0.031		10.32	8.75101	0.630081
174030	19.65	0.869	0.0312		10.3358	8.76008	0.634146
174231	19.688	0.8701	0.0313		10.3557	8.77117	0.636179
174431	19.728	0.871	0.0315		10.3768	8.78024	0.640244
174631	19.768	0.8721	0.0316		10.3978	8.79133	0.642276
174832	19.806	0.873	0.0317		10.4178	8.8004	0.644309
175032	19.85	0.874	0.032		10.441	8.81048	0.650407
175232	19.894	0.8751	0.032		10.4641	8.82157	0.650407
175433	19.938	0.8759	0.0322		10.4872	8.82964	0.654472
175633	19.978	0.8772	0.0323		10.5083	8.84274	0.656504
175835	20.026	0.8781	0.0325		10.5335	8.85181	0.660569
176036	20.07	0.8791	0.0327		10.5567	8.8619	0.664634
176236	20.106	0.8802	0.0328		10.5756	8.87298	0.666667
176437	20.146	0.8812	0.033		10.5967	8.88306	0.670732
176637	20.178	0.882	0.0332		10.6135	8.89113	0.674797
176837	20.214	0.8831	0.0332		10.6324	8.90222	0.674797
177038	20.258	0.8841	0.0334		10.6556	8.9123	0.678862
177238	20.296	0.8852	0.0336		10.6756	8.92339	0.682927
177439	20.332	0.886	0.0337		10.6945	8.93145	0.684959
177639	20.372	0.887	0.0338		10.7155	8.94153	0.686992
177839	20.408	0.888	0.034		10.7345	8.95161	0.691057
178040	20.45	0.889	0.0342		10.7566	8.96169	0.695122
178240	20.488	0.89	0.0343		10.7765	8.97177	0.697154
178440	20.526	0.8911	0.0344		10.7965	8.98286	0.699187
178641	20.562	0.8921	0.0345		10.8155	8.99294	0.70122
178841	20.596	0.893	0.0347		10.8334	9.00202	0.705285
179043	20.632	0.8938	0.0348		10.8523	9.01008	0.707317
179244	20.676	0.8949	0.035		10.8754	9.02117	0.711382
179444	20.712	0.8959	0.0351		10.8944	9.03125	0.713415
179645	20.754	0.8969	0.0353		10.9165	9.04133	0.71748
179845	20.798	0.898	0.0354		10.9396	9.05242	0.719512
180045	20.838	0.8989	0.0355		10.9606	9.06149	0.721545
180246	20.878	0.9	0.0358		10.9817	9.07258	0.727642
180446	20.924	0.9009	0.0358		11.0059	9.08165	0.727642
180647	20.958	0.902	0.036		11.0238	9.09274	0.731707
180847	20.996	0.9029	0.0362		11.0437	9.10181	0.735772
181047	21.036	0.9039	0.0363		11.0648	9.1119	0.737805
181248	21.068	0.9049	0.0365		11.0816	9.12198	0.74187
181448	21.108	0.9058	0.0366		11.1027	9.13105	0.743902
181649	21.154	0.9068	0.0368		11.1269	9.14113	0.747967
181849	21.19	0.9078	0.0369		11.1458	9.15121	0.75
182049	21.228	0.9088	0.037		11.1658	9.16129	0.752033
182250	21.27	0.9098	0.0371		11.1879	9.17137	0.754065
182450	21.312	0.9108	0.0373		11.21	9.18145	0.75813
182650	21.356	0.9117	0.0375		11.2331	9.19052	0.762195
182851	21.396	0.9128	0.0376		11.2541	9.20161	0.764228
183051	21.436	0.9138	0.0377		11.2752	9.21169	0.76626
183253	21.476	0.9148	0.038		11.2962	9.22177	0.772358
183454	21.512	0.9157	0.0381		11.3152	9.23085	0.77439
183654	21.548	0.9167	0.0382		11.3341	9.24093	0.776423
183855	21.59	0.9178	0.0384		11.3562	9.25202	0.780488
184055	21.64	0.9187	0.0386		11.3825	9.26109	0.784553
184255	21.676	0.9197	0.0387		11.4014	9.27117	0.786585
184456	21.718	0.9208	0.0388		11.4235	9.28226	0.788618
184656	21.758	0.9219	0.039		11.4446	9.29335	0.792683
184857	21.796	0.9228	0.0392		11.4645	9.30242	0.796748
185057	21.834	0.9238	0.0393		11.4845	9.3125	0.79878
185257	21.878	0.9247	0.0394		11.5077	9.32157	0.800813
185458	21.924	0.9258	0.0396		11.5319	9.33266	0.804878
185658	21.982	0.9268	0.0398		11.5624	9.34274	0.808943
185858	22.034	0.9282	0.04		11.5897	9.35685	0.813008
186059	22.074	0.9291	0.0402		11.6108	9.36593	0.817073
186259	22.12	0.9302	0.0403		11.635	9.37702	0.819106
186461	22.162	0.9313	0.0404		11.6571	9.3881	0.821138
186662	22.204	0.9323	0.0406		11.6791	9.39819	0.825203
186862	22.242	0.9334	0.0407		11.6991	9.40927	0.827236
187063	22.278	0.9345	0.0409		11.7181	9.42036	0.831301
187263	22.302	0.9352	0.0411		11.7307	9.42742	0.835366
187463	22.332	0.9363	0.0412		11.7465	9.43851	0.837398
187664	22.366	0.9372	0.0413		11.7644	9.44758	0.839431
187864	22.402	0.9382	0.0414		11.7833	9.45766	0.841463
188065	22.436	0.9392	0.0416		11.8012	9.46774	0.845528
188265	22.47	0.9401	0.0418		11.8191	9.47681	0.849593
188465	22.51	0.941	0.0419		11.8401	9.48589	0.851626
188666	22.554	0.942	0.0421		11.8632	9.49597	0.855691
188866	22.6	0.9432	0.0423		11.8874	9.50806	0.859756
189066	22.64	0.9441	0.0424		11.9085	9.51714	0.861789
189267	22.668	0.9451	0.0426		11.9232	9.52722	0.865854
189467	22.71	0.9461	0.0427		11.9453	9.5373	0.867886
189669	22.746	0.9472	0.0429		11.9642	9.54839	0.871951
189870	22.786	0.9481	0.043		11.9853	9.55746	0.873984
190070	22.826	0.9491	0.0432		12.0063	9.56754	0.878049
190271	22.864	0.9501	0.0434		12.0263	9.57762	0.882114
190471	22.902	0.951	0.0435		12.0463	9.58669	0.884146
190671	22.932	0.9521	0.0437		12.0621	9.59778	0.888211
190872	22.974	0.953	0.0438		12.0842	9.60685	0.890244
191072	23.012	0.9541	0.0439		12.1041	9.61794	0.892276
191273	23.054	0.955	0.0441		12.1262	9.62702	0.896341
191473	23.094	0.9562	0.0442		12.1473	9.63911	0.898374
191673	23.134	0.957	0.0444		12.1683	9.64718	0.902439
191874	23.17	0.9579	0.0445		12.1873	9.65625	0.904472
192074	23.204	0.9589	0.0446		12.2051	9.66633	0.906504
192274	23.24	0.9601	0.0449		12.2241	9.67843	0.912602
192475	23.276	0.961	0.045		12.243	9.6875	0.914634
192675	23.312	0.9621	0.0451		12.2619	9.69859	0.916667
192877	23.354	0.963	0.0453		12.284	9.70766	0.920732
193078	23.392	0.9641	0.0455		12.304	9.71875	0.924797
193278	23.42	0.9649	0.0456		12.3188	9.72681	0.926829
193479	23.454	0.966	0.0457		12.3366	9.7379	0.928862
193679	23.494	0.9669	0.0459		12.3577	9.74698	0.932927
193879	23.536	0.9679	0.0461		12.3798	9.75706	0.936992
194080	23.576	0.969	0.0462		12.4008	9.76815	0.939024
194280	23.616	0.9699	0.0463		12.4218	9.77722	0.941057
194481	23.652	0.971	0.0465		12.4408	9.78831	0.945122
194681	23.696	0.9719	0.0466		12.4639	9.79738	0.947154
194881	23.742	0.9731	0.0468		12.4881	9.80948	0.95122
195082	23.782	0.974	0.0469		12.5092	9.81855	0.953252
195282	23.826	0.975	0.0472		12.5323	9.82863	0.95935
195482	23.862	0.9759	0.0473		12.5512	9.8377	0.961382
195683	23.9	0.9769	0.0474		12.5712	9.84778	0.963415
195883	23.932	0.9779	0.0476		12.5881	9.85786	0.96748
196085	23.978	0.9792	0.0478		12.6123	9.87097	0.971545
196286	24.016	0.98	0.0479		12.6322	9.87903	0.973577
196486	24.052	0.981	0.0481		12.6512	9.88911	0.977642
196687	24.09	0.982	0.0483		12.6712	9.89919	0.981707
196887	24.13	0.983	0.0484		12.6922	9.90927	0.98374
197087	24.168	0.984	0.0486		12.7122	9.91935	0.987805
197288	24.2	0.9851	0.0487		12.729	9.93044	0.989837
197488	24.236	0.986	0.0488		12.748	9.93952	0.99187
197689	24.272	0.9868	0.0489		12.7669	9.94758	0.993902
197889	24.308	0.988	0.0491		12.7858	9.95968	0.997967
198089	24.352	0.989	0.0493		12.809	9.96976	1.00203
198290	24.388	0.99	0.0494		12.8279	9.97984	1.00407
198490	24.426	0.9909	0.0495		12.8479	9.98891	1.0061
198690	24.462	0.9919	0.0497		12.8668	9.99899	1.01016
198891	24.504	0.9929	0.0498		12.8889	10.0091	1.0122
199091	24.544	0.9939	0.05		12.91	10.0192	1.01626
199293	24.586	0.9951	0.0502		12.9321	10.0312	1.02033
199494	24.626	0.996	0.0503		12.9531	10.0403	1.02236
199694	24.664	0.9971	0.0504		12.9731	10.0514	1.02439
199895	24.698	0.9979	0.0507		12.991	10.0595	1.03049
200095	24.736	0.9991	0.0508		13.011	10.0716	1.03252
200295	24.774	0.9999	0.051		13.0309	10.0796	1.03659
200496	24.804	1.001	0.0511		13.0467	10.0907	1.03862
200696	24.844	1.002	0.0512		13.0678	10.1008	1.04065
200897	24.882	1.0031	0.0514		13.0878	10.1119	1.04472
201097	24.918	1.004	0.0515		13.1067	10.121	1.04675
201297	24.958	1.0051	0.0518		13.1277	10.1321	1.05285
201498	24.99	1.006	0.0519		13.1446	10.1411	1.05488
201698	25.028	1.007	0.052		13.1646	10.1512	1.05691
201899	25.076	1.0079	0.0522		13.1898	10.1603	1.06098
202099	25.118	1.009	0.0524		13.2119	10.1714	1.06504
202299	25.146	1.01	0.0526		13.2266	10.1815	1.06911
202500	25.178	1.011	0.0527		13.2435	10.1915	1.07114
202700	25.208	1.012	0.0528		13.2592	10.2016	1.07317
202900	25.24	1.0129	0.053		13.2761	10.2107	1.07724
203101	25.276	1.0138	0.053		13.295	10.2198	1.07724
203301	25.312	1.0148	0.0532		13.3139	10.2298	1.0813
203503	25.356	1.016	0.0534		13.3371	10.2419	1.08537
203704	25.402	1.017	0.0536		13.3613	10.252	1.08943
203904	25.448	1.018	0.0537		13.3855	10.2621	1.09146
204105	25.49	1.019	0.0538		13.4076	10.2722	1.0935
204305	25.526	1.02	0.054		13.4265	10.2823	1.09756
204505	25.564	1.0211	0.0542		13.4465	10.2933	1.10163
204706	25.608	1.0223	0.0543		13.4696	10.3054	1.10366
204906	25.64	1.0231	0.0545		13.4865	10.3135	1.10772
205107	25.676	1.0241	0.0546		13.5054	10.3236	1.10976
205307	25.714	1.0253	0.0548		13.5254	10.3357	1.11382
205507	25.75	1.0263	0.055		13.5443	10.3458	1.11789
205708	25.784	1.0272	0.0551		13.5622	10.3548	1.11992
205908	25.816	1.0281	0.0553		13.579	10.3639	1.12398
206108	25.856	1.0294	0.0554		13.6001	10.377	1.12602
206309	25.894	1.0303	0.0556		13.6201	10.3861	1.13008
206509	25.926	1.0312	0.0558		13.6369	10.3952	1.13415
206711	25.952	1.0324	0.0559		13.6506	10.4073	1.13618
206912	25.988	1.0333	0.056		13.6695	10.4163	1.13821
207112	26.018	1.0342	0.0563		13.6853	10.4254	1.14431
207313	26.05	1.0353	0.0563		13.7021	10.4365	1.14431
207513	26.084	1.0363	0.0565		13.72	10.4466	1.14837
207713	26.114	1.0372	0.0566		13.7358	10.4556	1.15041
207914	26.148	1.0382	0.0568		13.7537	10.4657	1.15447
208114	26.182	1.0392	0.0569		13.7715	10.4758	1.1565
208315	26.212	1.0402	0.057		13.7873	10.4859	1.15854
208515	26.25	1.041	0.0573		13.8073	10.494	1.16463
208715	26.29	1.0421	0.0575		13.8284	10.505	1.1687
208916	26.328	1.0431	0.0576		13.8483	10.5151	1.17073
209116	26.368	1.0441	0.0576		13.8694	10.5252	1.17073
209316	26.402	1.045	0.0579		13.8873	10.5343	1.17683
209517	26.442	1.0462	0.0581		13.9083	10.5464	1.18089
209717	26.478	1.0472	0.0581		13.9272	10.5565	1.18089
209919	26.51	1.0482	0.0583		13.9441	10.5665	1.18496
210120	26.544	1.0493	0.0585		13.962	10.5776	1.18902
210320	26.572	1.0502	0.0586		13.9767	10.5867	1.19106
210521	26.608	1.0512	0.0588		13.9956	10.5968	1.19512
210721	26.634	1.0521	0.059		14.0093	10.6058	1.19919
210921	26.668	1.053	0.0591		14.0272	10.6149	1.20122
211122	26.704	1.0541	0.0592		14.0461	10.626	1.20325
211322	26.738	1.0551	0.0594		14.064	10.6361	1.20732
211523	26.774	1.0561	0.0595		14.0829	10.6462	1.20935
211723	26.806	1.057	0.0596		14.0998	10.6552	1.21138
211923	26.85	1.0581	0.0599		14.1229	10.6663	1.21748
212124	26.882	1.059	0.06		14.1397	10.6754	1.21951
212324	26.92	1.0599	0.0601		14.1597	10.6845	1.22154
212524	26.958	1.0609	0.0603		14.1797	10.6946	1.22561
212725	26.994	1.062	0.0604		14.1987	10.7056	1.22764
212925	27.038	1.0629	0.0606		14.2218	10.7147	1.23171
213127	27.074	1.0641	0.0608		14.2407	10.7268	1.23577
213328	27.106	1.065	0.0609		14.2576	10.7359	1.2378
213528	27.144	1.0662	0.061		14.2776	10.748	1.23984
213729	27.172	1.0671	0.0612		14.2923	10.7571	1.2439
213929	27.208	1.068	0.0614		14.3112	10.7661	1.24797
214129	27.246	1.069	0.0615		14.3312	10.7762	1.25
214330	27.28	1.0701	0.0617		14.3491	10.7873	1.25407
214530	27.314	1.0711	0.0618		14.367	10.7974	1.2561
214731	27.348	1.0721	0.062		14.3849	10.8075	1.26016
214931	27.384	1.0732	0.0622		14.4038	10.8185	1.26423
215131	27.41	1.0741	0.0624		14.4175	10.8276	1.26829
215332	27.44	1.0751	0.0624		14.4332	10.8377	1.26829
215532	27.484	1.076	0.0626		14.4564	10.8468	1.27236
215732	27.526	1.077	0.0628		14.4785	10.8569	1.27642
215933	27.564	1.078	0.0629		14.4985	10.8669	1.27846
216133	27.602	1.0791	0.0631		14.5185	10.878	1.28252
216335	27.648	1.0801	0.0632		14.5427	10.8881	1.28455
216536	27.692	1.0813	0.0635		14.5658	10.9002	1.29065
216736	27.734	1.0823	0.0635		14.5879	10.9103	1.29065
216937	27.774	1.0834	0.0638		14.6089	10.9214	1.29675
217137	27.81	1.0844	0.0639		14.6279	10.9315	1.29878
217337	27.842	1.0855	0.0641		14.6447	10.9425	1.30285
217538	27.878	1.0865	0.0642		14.6636	10.9526	1.30488
217738	27.906	1.0876	0.0644		14.6784	10.9637	1.30894
217939	27.936	1.0885	0.0647		14.6941	10.9728	1.31504
218139	27.956	1.0895	0.0647		14.7047	10.9829	1.31504
218339	27.978	1.0904	0.0649		14.7162	10.9919	1.31911
218540	28.006	1.0913	0.065		14.731	11.001	1.32114
218740	28.038	1.0925	0.0651		14.7478	11.0131	1.32317
218940	28.066	1.0934	0.0653		14.7625	11.0222	1.32724
219141	28.094	1.0942	0.0655		14.7772	11.0302	1.3313
219341	28.122	1.0953	0.0657		14.792	11.0413	1.33537
219543	28.158	1.0963	0.0658		14.8109	11.0514	1.3374
219744	28.192	1.0973	0.0659		14.8288	11.0615	1.33943
219944	28.22	1.0982	0.0661		14.8435	11.0706	1.3435
220145	28.256	1.0992	0.0663		14.8625	11.0806	1.34756
220345	28.284	1.1003	0.0664		14.8772	11.0917	1.34959
220545	28.318	1.1013	0.0666		14.8951	11.1018	1.35366
220746	28.35	1.1022	0.0668		14.9119	11.1109	1.35772
220946	28.382	1.1033	0.067		14.9287	11.122	1.36179
221147	28.414	1.1042	0.067		14.9456	11.131	1.36179
221347	28.45	1.1051	0.0672		14.9645	11.1401	1.36585
221547	28.49	1.1062	0.0674		14.9855	11.1512	1.36992
221748	28.524	1.1072	0.0675		15.0034	11.1613	1.37195
221948	28.552	1.1083	0.0677		15.0182	11.1724	1.37602
222149	28.592	1.1092	0.0678		15.0392	11.1815	1.37805
222349	28.62	1.1103	0.068		15.0539	11.1925	1.38211
222549	28.646	1.1112	0.068		15.0676	11.2016	1.38211
222750	28.69	1.1123	0.0682		15.0907	11.2127	1.38618
222950	28.718	1.1133	0.0684		15.1055	11.2228	1.39024
223150	28.754	1.1141	0.0685		15.1244	11.2308	1.39228
223351	28.782	1.1152	0.0687		15.1391	11.2419	1.39634
223551	28.818	1.1162	0.0689		15.1581	11.252	1.40041
223753	28.846	1.1172	0.0691		15.1728	11.2621	1.40447
223954	28.882	1.1182	0.0691		15.1917	11.2722	1.40447
224154	28.912	1.1194	0.0693		15.2075	11.2843	1.40854
224355	28.942	1.1202	0.0695		15.2233	11.2923	1.4126
224555	28.982	1.1212	0.0696		15.2443	11.3024	1.41463
224755	29.014	1.1222	0.0698		15.2612	11.3125	1.4187
224956	29.046	1.1231	0.07		15.278	11.3216	1.42276
225156	29.072	1.1243	0.0701		15.2917	11.3337	1.4248
225357	29.098	1.1252	0.0702		15.3053	11.3427	1.42683
225557	29.13	1.1262	0.0704		15.3222	11.3528	1.43089
225757	29.166	1.1272	0.0706		15.3411	11.3629	1.43496
225958	29.196	1.1282	0.0708		15.3569	11.373	1.43902
226158	29.226	1.1292	0.0708		15.3727	11.3831	1.43902
226358	29.256	1.1302	0.071		15.3884	11.3931	1.44309
226559	29.296	1.1312	0.0712		15.4095	11.4032	1.44715
226759	29.328	1.1323	0.0714		15.4263	11.4143	1.45122
226961	29.362	1.1332	0.0714		15.4442	11.4234	1.45122
227162	29.398	1.1341	0.0716		15.4631	11.4325	1.45528
227362	29.432	1.1351	0.0718		15.481	11.4425	1.45935
227563	29.462	1.1362	0.072		15.4968	11.4536	1.46341
227763	29.494	1.1371	0.0721		15.5136	11.4627	1.46545
227963	29.524	1.1385	0.0723		15.5294	11.4768	1.46951
228164	29.55	1.1393	0.0724		15.5431	11.4849	1.47154
228364	29.58	1.1403	0.0727		15.5589	11.495	1.47764
228565	29.608	1.1412	0.0728		15.5736	11.504	1.47967
228765	29.636	1.1422	0.0729		15.5883	11.5141	1.48171
228965	29.664	1.1431	0.073		15.6031	11.5232	1.48374
229166	29.694	1.1441	0.0733		15.6188	11.5333	1.48984
229366	29.726	1.1451	0.0734		15.6357	11.5433	1.49187
229566	29.76	1.1462	0.0735		15.6535	11.5544	1.4939
229767	29.788	1.1471	0.0737		15.6683	11.5635	1.49797
229967	29.814	1.148	0.0739		15.682	11.5726	1.50203
230169	29.848	1.1491	0.074		15.6998	11.5837	1.50407
230370	29.88	1.1502	0.0741		15.7167	11.5948	1.5061
230570	29.908	1.1511	0.0743		15.7314	11.6038	1.51016
230771	29.938	1.1522	0.0744		15.7472	11.6149	1.5122
230971	29.966	1.153	0.0746		15.7619	11.623	1.51626
231171	30	1.154	0.0748		15.7798	11.6331	1.52033
231372	30.03	1.155	0.0749		15.7956	11.6431	1.52236
231572	30.066	1.1562	0.0752		15.8145	11.6552	1.52846
231773	30.102	1.157	0.0752		15.8334	11.6633	1.52846
231973	30.134	1.1581	0.0754		15.8503	11.6744	1.53252
232173	30.164	1.1593	0.0756		15.8661	11.6865	1.53659
232374	30.194	1.1603	0.0757		15.8818	11.6966	1.53862
232574	30.228	1.1613	0.0759		15.8997	11.7067	1.54268
232774	30.256	1.1623	0.076		15.9144	11.7167	1.54472
232975	30.292	1.1634	0.0762		15.9334	11.7278	1.54878
233175	30.314	1.1643	0.0764		15.9449	11.7369	1.55285
233377	30.342	1.1653	0.0765		15.9597	11.747	1.55488
233578	30.364	1.1663	0.0766		15.9712	11.7571	1.55691
233778	30.392	1.1671	0.0768		15.986	11.7651	1.56098
233979	30.418	1.1683	0.077		15.9997	11.7772	1.56504
234179	30.45	1.1692	0.0771		16.0165	11.7863	1.56707
234379	30.478	1.1704	0.0772		16.0312	11.7984	1.56911
234580	30.512	1.1713	0.0775		16.0491	11.8075	1.5752
234780	30.54	1.1723	0.0776		16.0638	11.8175	1.57724
234981	30.568	1.1732	0.0778		16.0786	11.8266	1.5813
235181	30.602	1.1742	0.0779		16.0964	11.8367	1.58333
235381	30.626	1.1752	0.0781		16.1091	11.8468	1.5874
235582	30.652	1.1761	0.0782		16.1227	11.8558	1.58943
235782	30.684	1.1771	0.0784		16.1396	11.8659	1.5935
235982	30.714	1.1781	0.0785		16.1553	11.876	1.59553
236183	30.736	1.1792	0.0787		16.1669	11.8871	1.59959
236383	30.77	1.1801	0.0788		16.1848	11.8962	1.60163
236585	30.802	1.1811	0.079		16.2016	11.9062	1.60569
236786	30.834	1.1821	0.0792		16.2185	11.9163	1.60976
236986	30.864	1.1832	0.0792		16.2342	11.9274	1.60976
237187	30.89	1.1841	0.0795		16.2479	11.9365	1.61585
237387	30.92	1.1852	0.0795		16.2637	11.9476	1.61585
237587	30.954	1.1861	0.0798		16.2816	11.9567	1.62195
237788	30.982	1.1872	0.08		16.2963	11.9677	1.62602
237988	31.012	1.1881	0.0801		16.3121	11.9768	1.62805
238189	31.04	1.1892	0.0802		16.3268	11.9879	1.63008
238389	31.07	1.1901	0.0804		16.3426	11.997	1.63415
238589	31.098	1.1912	0.0806		16.3573	12.0081	1.63821
238790	31.132	1.1922	0.0807		16.3752	12.0181	1.64024
238990	31.162	1.1933	0.0809		16.391	12.0292	1.64431
239190	31.192	1.1944	0.0811		16.4068	12.0403	1.64837
239391	31.218	1.1952	0.0812		16.4204	12.0484	1.65041
239591	31.248	1.1962	0.0814		16.4362	12.0585	1.65447
239793	31.28	1.1972	0.0815		16.4531	12.0685	1.6565
239994	31.314	1.1983	0.0817		16.4709	12.0796	1.66057
240194	31.346	1.1993	0.0819		16.4878	12.0897	1.66463
240395	31.372	1.2004	0.0821		16.5015	12.1008	1.6687
240595	31.398	1.2012	0.0823		16.5151	12.1089	1.67276
240795	31.422	1.2022	0.0824		16.5278	12.119	1.6748
240996	31.442	1.2033	0.0825		16.5383	12.13	1.67683
241196	31.468	1.2043	0.0827		16.5519	12.1401	1.68089
241397	31.496	1.2053	0.0829		16.5667	12.1502	1.68496
241597	31.524	1.2062	0.0831		16.5814	12.1593	1.68902
241797	31.55	1.2071	0.0832		16.5951	12.1683	1.69106
241998	31.582	1.2081	0.0834		16.6119	12.1784	1.69512
242198	31.612	1.2092	0.0835		16.6277	12.1895	1.69715
242399	31.64	1.2102	0.0838		16.6424	12.1996	1.70325
242599	31.67	1.2113	0.0838		16.6582	12.2107	1.70325
242799	31.698	1.2123	0.084		16.6729	12.2208	1.70732
243000	31.72	1.2133	0.0842		16.6845	12.2308	1.71138
243200	31.752	1.2143	0.0843		16.7013	12.2409	1.71341
243400	31.772	1.2153	0.0845		16.7118	12.251	1.71748
243601	31.798	1.2162	0.0847		16.7255	12.2601	1.72154
243801	31.83	1.2172	0.0848		16.7424	12.2702	1.72358
244003	31.864	1.2183	0.0851		16.7602	12.2812	1.72967
244204	31.892	1.2193	0.0852		16.775	12.2913	1.73171
244404	31.918	1.2202	0.0853		16.7886	12.3004	1.73374
244605	31.942	1.2213	0.0856		16.8013	12.3115	1.73984
244805	31.968	1.2222	0.0857		16.8149	12.3206	1.74187
245005	31.99	1.2232	0.0858		16.8265	12.3306	1.7439
245206	32.018	1.2241	0.0859		16.8412	12.3397	1.74593
245406	32.04	1.2251	0.0862		16.8528	12.3498	1.75203
245607	32.072	1.2264	0.0863		16.8696	12.3629	1.75407
245807	32.098	1.2273	0.0865		16.8833	12.372	1.75813
246007	32.118	1.2282	0.0867		16.8938	12.381	1.7622
246208	32.142	1.2293	0.0867		16.9065	12.3921	1.7622
246408	32.17	1.2302	0.0869		16.9212	12.4012	1.76626
246608	32.2	1.2312	0.0871		16.937	12.4113	1.77033
246809	32.236	1.2322	0.0874		16.9559	12.4214	1.77642
247009	32.272	1.2333	0.0874		16.9748	12.4325	1.77642
247211	32.288	1.2344	0.0876		16.9833	12.4435	1.78049
247412	32.314	1.2353	0.0878		16.9969	12.4526	1.78455
247612	32.338	1.2363	0.0879		17.0096	12.4627	1.78659
247813	32.37	1.2373	0.0882		17.0264	12.4728	1.79268
248013	32.398	1.2385	0.0883		17.0411	12.4849	1.79472
248213	32.42	1.2395	0.0885		17.0527	12.495	1.79878
248414	32.438	1.2403	0.0887		17.0622	12.503	1.80285
248614	32.46	1.2414	0.0888		17.0737	12.5141	1.80488
248815	32.484	1.2424	0.089		17.0864	12.5242	1.80894
249015	32.506	1.2433	0.0891		17.0979	12.5333	1.81098
249215	32.54	1.2443	0.0893		17.1158	12.5433	1.81504
249416	32.57	1.2452	0.0895		17.1316	12.5524	1.81911
249616	32.596	1.2462	0.0896		17.1453	12.5625	1.82114
249816	32.624	1.2472	0.0898		17.16	12.5726	1.8252
250017	32.654	1.2483	0.09		17.1758	12.5837	1.82927
250217	32.682	1.2493	0.0902		17.1905	12.5938	1.83333
250419	32.714	1.2504	0.0904		17.2073	12.6048	1.8374
250620	32.73	1.2513	0.0905		17.2157	12.6139	1.83943
250820	32.754	1.2523	0.0906		17.2284	12.624	1.84146
251021	32.778	1.2534	0.0908		17.241	12.6351	1.84553
251221	32.804	1.2543	0.0911		17.2547	12.6442	1.85163
251421	32.836	1.2553	0.0912		17.2715	12.6542	1.85366
251622	32.858	1.2563	0.0912		17.2831	12.6643	1.85366
251822	32.888	1.2574	0.0914		17.2989	12.6754	1.85772
252023	32.914	1.2583	0.0917		17.3125	12.6845	1.86382
252223	32.94	1.2593	0.0919		17.3262	12.6946	1.86789
252423	32.964	1.2604	0.092		17.3388	12.7056	1.86992
252624	32.984	1.2614	0.0922		17.3494	12.7157	1.87398
252824	33.004	1.2623	0.0924		17.3599	12.7248	1.87805
253024	33.028	1.2634	0.0926		17.3725	12.7359	1.88211
253225	33.06	1.2644	0.0927		17.3893	12.746	1.88415
253425	33.09	1.2654	0.0929		17.4051	12.756	1.88821
253627	33.108	1.2665	0.0931		17.4146	12.7671	1.89228
253828	33.136	1.2673	0.0933		17.4293	12.7752	1.89634
254028	33.16	1.2683	0.0934		17.4419	12.7853	1.89837
254229	33.188	1.2693	0.0936		17.4567	12.7954	1.90244
254429	33.21	1.2704	0.0938		17.4682	12.8065	1.9065
254629	33.242	1.2713	0.094		17.4851	12.8155	1.91057
254830	33.266	1.2725	0.0941		17.4977	12.8276	1.9126
255030	33.284	1.2734	0.0943		17.5071	12.8367	1.91667
255231	33.316	1.2744	0.0944		17.524	12.8468	1.9187
255431	33.338	1.2753	0.0946		17.5356	12.8558	1.92276
255631	33.36	1.2764	0.0948		17.5471	12.8669	1.92683
255832	33.38	1.2774	0.0951		17.5576	12.877	1.93293
256032	33.402	1.2783	0.0951		17.5692	12.8861	1.93293
256232	33.422	1.2793	0.0954		17.5797	12.8962	1.93902
256433	33.448	1.2803	0.0956		17.5934	12.9062	1.94309
256633	33.474	1.2813	0.0957		17.6071	12.9163	1.94512
256835	33.5	1.2823	0.0959		17.6208	12.9264	1.94919
257036	33.522	1.2833	0.0962		17.6323	12.9365	1.95528
257236	33.54	1.2843	0.0963		17.6418	12.9466	1.95732
257437	33.56	1.2853	0.0965		17.6523	12.9567	1.96138
257637	33.588	1.2863	0.0966		17.6671	12.9667	1.96341
257837	33.608	1.2873	0.0968		17.6776	12.9768	1.96748
258038	33.624	1.2883	0.0971		17.686	12.9869	1.97358
258238	33.65	1.2892	0.0973		17.6997	12.996	1.97764
258439	33.672	1.2902	0.0974		17.7112	13.006	1.97967
258639	33.698	1.2913	0.0977		17.7249	13.0171	1.98577
258839	33.724	1.2923	0.098		17.7386	13.0272	1.99187
259040	33.748	1.2935	0.0981		17.7512	13.0393	1.9939
259240	33.76	1.2943	0.0984		17.7575	13.0474	2
259440	33.778	1.2953	0.0986		17.767	13.0575	2.00407
259641	33.806	1.2963	0.0988		17.7817	13.0675	2.00813
259841	33.832	1.2972	0.099		17.7954	13.0766	2.0122
260043	33.856	1.2982	0.0993		17.808	13.0867	2.01829
260244	33.88	1.2991	0.0995		17.8206	13.0958	2.02236
260444	33.9	1.3004	0.0997		17.8312	13.1089	2.02642
260645	33.94	1.3013	0.0999		17.8522	13.1179	2.03049
260845	33.97	1.3023	0.1002		17.868	13.128	2.03659
261045	34.002	1.3035	0.1003		17.8848	13.1401	2.03862
261246	34.022	1.3045	0.1006		17.8953	13.1502	2.04472
261446	34.036	1.3054	0.1009		17.9027	13.1593	2.05081
261647	34.058	1.3065	0.1011		17.9143	13.1704	2.05488
261847	34.082	1.3076	0.1013		17.9269	13.1815	2.05894
262047	34.108	1.3086	0.1017		17.9406	13.1915	2.06707
262248	34.126	1.3095	0.1018		17.95	13.2006	2.06911
262448	34.142	1.3105	0.102		17.9585	13.2107	2.07317
262649	34.164	1.3114	0.1023		17.97	13.2198	2.07927
262849	34.188	1.3125	0.1026		17.9826	13.2308	2.08537
263049	34.202	1.3135	0.1028		17.99	13.2409	2.08943
263250	34.224	1.3145	0.1031		18.0016	13.251	2.09553
263450	34.248	1.3155	0.1033		18.0142	13.2611	2.09959
263650	34.272	1.3165	0.1036		18.0268	13.2712	2.10569
263851	34.294	1.3177	0.1038		18.0384	13.2833	2.10976
264051	34.31	1.3185	0.1042		18.0468	13.2913	2.11789
264253	34.336	1.3195	0.1044		18.0605	13.3014	2.12195
264454	34.35	1.3205	0.1045		18.0679	13.3115	2.12398
264654	34.368	1.3214	0.1048		18.0773	13.3206	2.13008
264855	34.394	1.3222	0.1051		18.091	13.3286	2.13618
265055	34.418	1.3233	0.1053		18.1036	13.3397	2.14024
265255	34.442	1.3244	0.1055		18.1162	13.3508	2.14431
265456	34.458	1.3254	0.1057		18.1247	13.3609	2.14837
265656	34.494	1.3264	0.106		18.1436	13.371	2.15447
265857	34.516	1.3274	0.1063		18.1552	13.381	2.16057
266057	34.538	1.3286	0.1065		18.1667	13.3931	2.16463
266257	34.552	1.3295	0.1068		18.1741	13.4022	2.17073
266458	34.57	1.3305	0.107		18.1836	13.4123	2.1748
266658	34.588	1.3315	0.1073		18.193	13.4224	2.18089
266858	34.608	1.3325	0.1075		18.2036	13.4325	2.18496
267059	34.634	1.3336	0.1078		18.2172	13.4435	2.19106
267259	34.658	1.3345	0.108		18.2299	13.4526	2.19512
267461	34.674	1.3355	0.1083		18.2383	13.4627	2.20122
267662	34.696	1.3365	0.1085		18.2499	13.4728	2.20528
267862	34.72	1.3376	0.1088		18.2625	13.4839	2.21138
268063	34.74	1.3386	0.109		18.273	13.494	2.21545
268263	34.762	1.3396	0.1093		18.2846	13.504	2.22154
268463	34.786	1.3406	0.1096		18.2972	13.5141	2.22764
268664	34.804	1.3416	0.1097		18.3067	13.5242	2.22967
268864	34.82	1.3427	0.1101		18.3151	13.5353	2.2378
269065	34.836	1.3436	0.1103		18.3235	13.5444	2.24187
269265	34.852	1.3445	0.1106		18.3319	13.5534	2.24797
269465	34.868	1.3455	0.1108		18.3403	13.5635	2.25203
269666	34.888	1.3466	0.111		18.3508	13.5746	2.2561
269866	34.912	1.3476	0.1113		18.3635	13.5847	2.2622
270066	34.932	1.3486	0.1116		18.374	13.5948	2.26829
270267	34.954	1.3496	0.1118		18.3856	13.6048	2.27236
270467	34.972	1.3505	0.1121		18.395	13.6139	2.27846
270669	34.994	1.3516	0.1122		18.4066	13.625	2.28049
270870	35.01	1.3526	0.1126		18.415	13.6351	2.28862
271070	35.032	1.3534	0.1127		18.4266	13.6431	2.29065
271271	35.052	1.3545	0.1131		18.4371	13.6542	2.29878
271471	35.074	1.3555	0.1134		18.4487	13.6643	2.30488
271671	35.09	1.3565	0.1136		18.4571	13.6744	2.30894
271872	35.112	1.3575	0.1139		18.4687	13.6845	2.31504
272072	35.136	1.3586	0.1141		18.4813	13.6956	2.31911
272273	35.154	1.3597	0.1144		18.4908	13.7067	2.3252
272473	35.174	1.3606	0.1146		18.5013	13.7157	2.32927
272673	35.192	1.3615	0.1148		18.5107	13.7248	2.33333
272874	35.212	1.3626	0.1151		18.5213	13.7359	2.33943
273074	35.226	1.3636	0.1154		18.5286	13.746	2.34553
273274	35.248	1.3645	0.1157		18.5402	13.755	2.35163
273475	35.264	1.3655	0.1159		18.5486	13.7651	2.35569
273675	35.284	1.3665	0.1162		18.5591	13.7752	2.36179
273877	35.3	1.3676	0.1164		18.5676	13.7863	2.36585
274078	35.316	1.3685	0.1167		18.576	13.7954	2.37195
274278	35.34	1.3696	0.1169		18.5886	13.8065	2.37602
274479	35.36	1.3705	0.1172		18.5991	13.8155	2.38211
274679	35.382	1.3715	0.1174		18.6107	13.8256	2.38618
274879	35.396	1.3724	0.1178		18.618	13.8347	2.39431
275080	35.416	1.3734	0.1181		18.6286	13.8448	2.40041
275280	35.438	1.3744	0.1183		18.6401	13.8548	2.40447
275481	35.458	1.3756	0.1185		18.6507	13.8669	2.40854
275681	35.472	1.3765	0.1189		18.658	13.876	2.41667
275881	35.494	1.3776	0.1192		18.6696	13.8871	2.42276
276082	35.51	1.3784	0.1193		18.678	13.8952	2.4248
276282	35.528	1.3796	0.1195		18.6875	13.9073	2.42886
276482	35.542	1.3804	0.1199		18.6948	13.9153	2.43699
276683	35.564	1.3815	0.1202		18.7064	13.9264	2.44309
276883	35.59	1.3825	0.1204		18.7201	13.9365	2.44715
277085	35.604	1.3835	0.1207		18.7275	13.9466	2.45325
277286	35.63	1.3844	0.121		18.7411	13.9556	2.45935
277486	35.654	1.3853	0.1213		18.7538	13.9647	2.46545
277687	35.674	1.3867	0.1215		18.7643	13.9788	2.46951
277887	35.69	1.3876	0.1218		18.7727	13.9879	2.47561
278087	35.718	1.3884	0.122		18.7874	13.996	2.47967
278288	35.734	1.3896	0.1224		18.7958	14.0081	2.4878
278488	35.75	1.3905	0.1226		18.8042	14.0171	2.49187
278689	35.766	1.3915	0.1229		18.8127	14.0272	2.49797
278889	35.786	1.3925	0.1232		18.8232	14.0373	2.50407
279089	35.794	1.3935	0.1234		18.8274	14.0474	2.50813
279290	35.808	1.3945	0.1237		18.8348	14.0575	2.51423
279490	35.828	1.3955	0.124		18.8453	14.0675	2.52033
279690	35.844	1.3965	0.1242		18.8537	14.0776	2.52439
279891	35.864	1.3975	0.1245		18.8642	14.0877	2.53049
280091	35.886	1.3985	0.1248		18.8758	14.0978	2.53659
280293	35.906	1.3995	0.1251		18.8863	14.1079	2.54268
280494	35.922	1.4005	0.1254		18.8947	14.1179	2.54878
280694	35.94	1.4016	0.1256		18.9042	14.129	2.55285
280895	35.956	1.4026	0.126		18.9126	14.1391	2.56098
281095	35.972	1.4037	0.1263		18.921	14.1502	2.56707
281295	35.99	1.4046	0.1265		18.9305	14.1593	2.57114
281496	36	1.4055	0.1268		18.9357	14.1683	2.57724
281696	36.018	1.4067	0.127		18.9452	14.1804	2.5813
281897	36.036	1.4074	0.1273		18.9547	14.1875	2.5874
282097	36.048	1.4085	0.1277		18.961	14.1986	2.59553
282297	36.066	1.4095	0.1278		18.9705	14.2087	2.59756
282498	36.086	1.4105	0.1282		18.981	14.2188	2.60569
282698	36.106	1.4116	0.1285		18.9915	14.2298	2.61179
282899	36.128	1.4125	0.1288		19.0031	14.2389	2.61789
283099	36.146	1.4136	0.129		19.0125	14.25	2.62195
283299	36.168	1.4147	0.1293		19.0241	14.2611	2.62805
283500	36.186	1.4157	0.1297		19.0336	14.2712	2.63618
283700	36.206	1.4167	0.1299		19.0441	14.2812	2.64024
283900	36.224	1.4176	0.1302		19.0536	14.2903	2.64634
284101	36.236	1.4187	0.1305		19.0599	14.3014	2.65244
284301	36.252	1.4195	0.1308		19.0683	14.3095	2.65854
284503	36.274	1.4204	0.1311		19.0799	14.3185	2.66463
284704	36.29	1.4216	0.1313		19.0883	14.3306	2.6687
284904	36.308	1.4226	0.1317		19.0978	14.3407	2.67683
285105	36.322	1.4235	0.1318		19.1051	14.3498	2.67886
285305	36.34	1.4247	0.1321		19.1146	14.3619	2.68496
285505	36.36	1.4256	0.1325		19.1251	14.371	2.69309
285706	36.372	1.4267	0.1327		19.1314	14.3821	2.69715
285906	36.39	1.4277	0.1331		19.1409	14.3921	2.70528
286107	36.402	1.4287	0.1334		19.1472	14.4022	2.71138
286307	36.41	1.4297	0.1337		19.1514	14.4123	2.71748
286507	36.428	1.4307	0.1339		19.1609	14.4224	2.72154
286708	36.444	1.4317	0.1343		19.1693	14.4325	2.72967
286908	36.454	1.4326	0.1345		19.1745	14.4415	2.73374
287108	36.468	1.4336	0.1348		19.1819	14.4516	2.73984
287309	36.484	1.4344	0.1351		19.1903	14.4597	2.74593
287509	36.492	1.4356	0.1353		19.1945	14.4718	2.75
287711	36.512	1.4366	0.1356		19.2051	14.4819	2.7561
287912	36.524	1.4375	0.136		19.2114	14.4909	2.76423
288112	36.538	1.4387	0.1362		19.2187	14.503	2.76829
288313	36.552	1.4395	0.1365		19.2261	14.5111	2.77439
288513	36.572	1.4405	0.1368		19.2366	14.5212	2.78049
288713	36.584	1.4415	0.1371		19.2429	14.5312	2.78659
288914	36.598	1.4424	0.1374		19.2503	14.5403	2.79268
289114	36.622	1.4436	0.1377		19.2629	14.5524	2.79878
289315	36.632	1.4446	0.138		19.2682	14.5625	2.80488
289515	36.648	1.4455	0.1383		19.2766	14.5716	2.81098
289715	36.668	1.4466	0.1387		19.2871	14.5827	2.81911
289916	36.678	1.4476	0.1389		19.2924	14.5927	2.82317
290116	36.69	1.4486	0.1393		19.2987	14.6028	2.8313
290316	36.708	1.4496	0.1395		19.3081	14.6129	2.83537
290517	36.72	1.4505	0.1398		19.3145	14.622	2.84146
290717	36.74	1.4516	0.14		19.325	14.6331	2.84553
290919	36.752	1.4525	0.1403		19.3313	14.6421	2.85163
291120	36.772	1.4535	0.1406		19.3418	14.6522	2.85772
291320	36.788	1.4545	0.1409		19.3502	14.6623	2.86382
291521	36.8	1.4556	0.1413		19.3565	14.6734	2.87195
291721	36.81	1.4565	0.1415		19.3618	14.6825	2.87602
291921	36.828	1.4575	0.1419		19.3713	14.6925	2.88415
292122	36.844	1.4585	0.1421		19.3797	14.7026	2.88821
292322	36.858	1.4595	0.1425		19.387	14.7127	2.89634
292523	36.878	1.4605	0.1427		19.3976	14.7228	2.90041
292723	36.902	1.4616	0.1431		19.4102	14.7339	2.90854
292923	36.928	1.4626	0.1433		19.4239	14.744	2.9126
293124	36.946	1.4637	0.1437		19.4333	14.755	2.92073
293324	36.964	1.4647	0.144		19.4428	14.7651	2.92683
293524	36.974	1.4657	0.1443		19.4481	14.7752	2.93293
293725	36.982	1.4666	0.1446		19.4523	14.7843	2.93902
293925	37	1.4678	0.145		19.4617	14.7964	2.94715
294127	37.01	1.4686	0.1452		19.467	14.8044	2.95122
294328	37.03	1.4698	0.1456		19.4775	14.8165	2.95935
294528	37.042	1.4707	0.1459		19.4838	14.8256	2.96545
294729	37.056	1.4717	0.1463		19.4912	14.8357	2.97358
294929	37.068	1.4726	0.1466		19.4975	14.8448	2.97967
295129	37.086	1.4737	0.1469		19.507	14.8558	2.98577
295330	37.1	1.4748	0.1472		19.5143	14.8669	2.99187
295530	37.114	1.4756	0.1475		19.5217	14.875	2.99797
295731	37.126	1.4767	0.1478		19.528	14.8861	3.00407
295931	37.144	1.4778	0.1481		19.5375	14.8972	3.01016
296131	37.15	1.4788	0.1485		19.5406	14.9073	3.01829
296332	37.16	1.4799	0.1487		19.5459	14.9183	3.02236
296532	37.178	1.4808	0.1491		19.5554	14.9274	3.03049
296732	37.198	1.4819	0.1493		19.5659	14.9385	3.03455
296933	37.21	1.4828	0.1497		19.5722	14.9476	3.04268
297133	37.222	1.4838	0.1499		19.5785	14.9577	3.04675
297335	37.234	1.4849	0.1502		19.5848	14.9688	3.05285
297536	37.242	1.4858	0.1505		19.589	14.9778	3.05894
297736	37.256	1.4868	0.1509		19.5964	14.9879	3.06707
297937	37.27	1.4877	0.1512		19.6038	14.997	3.07317
298137	37.284	1.4887	0.1515		19.6111	15.0071	3.07927
298337	37.306	1.4898	0.1519		19.6227	15.0181	3.0874
298538	37.314	1.4907	0.1522		19.6269	15.0272	3.0935
298738	37.334	1.4918	0.1525		19.6374	15.0383	3.09959
298939	37.346	1.4927	0.1528		19.6437	15.0474	3.10569
299139	37.36	1.4938	0.1531		19.6511	15.0585	3.11179
299339	37.374	1.4947	0.1534		19.6585	15.0675	3.11789
299540	37.392	1.4959	0.1537		19.6679	15.0796	3.12398
299740	37.4	1.4969	0.154		19.6721	15.0897	3.13008
299940	37.41	1.4979	0.1543		19.6774	15.0998	3.13618
300141	37.414	1.4989	0.1547		19.6795	15.1099	3.14431
300341	37.428	1.4997	0.1549		19.6869	15.1179	3.14837
300543	37.448	1.5008	0.1552		19.6974	15.129	3.15447
300744	37.462	1.5018	0.1556		19.7047	15.1391	3.1626
300944	37.466	1.5027	0.156		19.7069	15.1482	3.17073
301145	37.484	1.5038	0.1562		19.7163	15.1593	3.1748
301345	37.496	1.5048	0.1565		19.7226	15.1694	3.18089
301545	37.518	1.5056	0.1569		19.7342	15.1774	3.18902
301746	37.536	1.5068	0.1572		19.7437	15.1895	3.19512
301946	37.542	1.5078	0.1575		19.7468	15.1996	3.20122
302147	37.554	1.5088	0.1578		19.7531	15.2097	3.20732
302347	37.566	1.5098	0.1581		19.7595	15.2198	3.21341
302547	37.576	1.5108	0.1585		19.7647	15.2298	3.22154
302748	37.59	1.5117	0.1587		19.7721	15.2389	3.22561
302948	37.6	1.5127	0.159		19.7773	15.249	3.23171
303149	37.618	1.5137	0.1594		19.7868	15.2591	3.23984
303349	37.628	1.5146	0.1597		19.7921	15.2681	3.24593
303549	37.638	1.5156	0.1599		19.7973	15.2782	3.25
303750	37.652	1.5167	0.1603		19.8047	15.2893	3.25813
303950	37.676	1.5178	0.1606		19.8173	15.3004	3.26423
304150	37.694	1.5188	0.161		19.8268	15.3105	3.27236
304351	37.708	1.5198	0.1613		19.8341	15.3206	3.27846
304551	37.72	1.521	0.1617		19.8405	15.3327	3.28659
304753	37.728	1.5218	0.162		19.8447	15.3407	3.29268
304954	37.73	1.5228	0.1623		19.8457	15.3508	3.29878
305154	37.74	1.5239	0.1626		19.851	15.3619	3.30488
305355	37.752	1.5247	0.163		19.8573	15.37	3.31301
305555	37.764	1.5257	0.1633		19.8636	15.38	3.31911
305755	37.784	1.5268	0.1636		19.8741	15.3911	3.3252
305956	37.792	1.5278	0.1639		19.8783	15.4012	3.3313
306156	37.808	1.5289	0.1643		19.8867	15.4123	3.33943
306357	37.824	1.5299	0.1646		19.8952	15.4224	3.34553
306557	37.828	1.5307	0.165		19.8973	15.4304	3.35366
306757	37.844	1.5319	0.1652		19.9057	15.4425	3.35772
306958	37.856	1.5329	0.1655		19.912	15.4526	3.36382
307158	37.862	1.5337	0.1658		19.9151	15.4607	3.36992
307358	37.868	1.5348	0.1662		19.9183	15.4718	3.37805
307559	37.882	1.5358	0.1665		19.9257	15.4819	3.38415
307759	37.894	1.5367	0.1669		19.932	15.4909	3.39228
307961	37.908	1.5379	0.1671		19.9393	15.503	3.39634
308162	37.918	1.5388	0.1676		19.9446	15.5121	3.4065
308362	37.932	1.5398	0.1678		19.952	15.5222	3.41057
308563	37.942	1.5408	0.1682		19.9572	15.5323	3.4187
308763	37.958	1.5418	0.1685		19.9656	15.5423	3.4248
308963	37.966	1.5428	0.1689		19.9698	15.5524	3.43293
309164	37.978	1.5437	0.1692		19.9762	15.5615	3.43902
309364	37.99	1.5448	0.1695		19.9825	15.5726	3.44512
309565	38	1.5458	0.1699		19.9877	15.5827	3.45325
309765	38.008	1.5468	0.1703		19.9919	15.5927	3.46138
309965	38.02	1.5479	0.1705		19.9983	15.6038	3.46545
310166	38.03	1.5489	0.1709		20.0035	15.6139	3.47358
310366	38.036	1.5499	0.1712		20.0067	15.624	3.47967
310566	38.046	1.5508	0.1715		20.0119	15.6331	3.48577
310767	38.052	1.5517	0.1719		20.0151	15.6421	3.4939
310967	38.062	1.5527	0.1722		20.0203	15.6522	3.5
311169	38.072	1.5538	0.1725		20.0256	15.6633	3.5061
311370	38.086	1.5547	0.1729		20.033	15.6724	3.51423
311570	38.1	1.5558	0.1732		20.0403	15.6835	3.52033
311771	38.12	1.5569	0.1735		20.0509	15.6946	3.52642
311971	38.126	1.5578	0.1739		20.054	15.7036	3.53455
312171	38.144	1.5588	0.1742		20.0635	15.7137	3.54065
312372	38.158	1.5598	0.1745		20.0708	15.7238	3.54675
312572	38.17	1.5609	0.1749		20.0772	15.7349	3.55488
312773	38.184	1.5619	0.1752		20.0845	15.745	3.56098
312973	38.192	1.5628	0.1756		20.0887	15.754	3.56911
313173	38.198	1.5639	0.1759		20.0919	15.7651	3.5752
313374	38.204	1.5648	0.1762		20.095	15.7742	3.5813
313574	38.216	1.5658	0.1766		20.1013	15.7843	3.58943
313774	38.224	1.5669	0.177		20.1056	15.7954	3.59756
313975	38.234	1.5678	0.1773		20.1108	15.8044	3.60366
314175	38.242	1.5689	0.1777		20.115	15.8155	3.61179
314377	38.256	1.5699	0.178		20.1224	15.8256	3.61789
314578	38.268	1.5708	0.1783		20.1287	15.8347	3.62398
314778	38.274	1.5718	0.1787		20.1319	15.8448	3.63211
314979	38.286	1.573	0.179		20.1382	15.8569	3.63821
315179	38.296	1.574	0.1794		20.1434	15.8669	3.64634
315379	38.308	1.575	0.1797		20.1497	15.877	3.65244
315580	38.318	1.5759	0.18		20.155	15.8861	3.65854
315780	38.324	1.5768	0.1804		20.1582	15.8952	3.66667
315981	38.334	1.5779	0.1808		20.1634	15.9062	3.6748
316181	38.342	1.5788	0.1811		20.1676	15.9153	3.68089
316381	38.348	1.5798	0.1814		20.1708	15.9254	3.68699
316582	38.362	1.5808	0.1818		20.1781	15.9355	3.69512
316782	38.372	1.5818	0.1821		20.1834	15.9456	3.70122
316982	38.382	1.5828	0.1824		20.1887	15.9556	3.70732
317183	38.388	1.5837	0.1827		20.1918	15.9647	3.71341
317383	38.4	1.5849	0.1831		20.1981	15.9768	3.72154
317585	38.414	1.5858	0.1834		20.2055	15.9859	3.72764
317786	38.424	1.5869	0.1839		20.2108	15.997	3.7378
317986	38.432	1.5878	0.1843		20.215	16.006	3.74593
318187	38.45	1.5889	0.1844		20.2244	16.0171	3.74797
318387	38.452	1.59	0.1849		20.2255	16.0282	3.75813
318587	38.464	1.5908	0.1852		20.2318	16.0363	3.76423
318788	38.474	1.5919	0.1856		20.2371	16.0474	3.77236
318988	38.482	1.5929	0.1859		20.2413	16.0575	3.77846
319189	38.496	1.5941	0.1863		20.2486	16.0696	3.78659
319389	38.506	1.5949	0.1866		20.2539	16.0776	3.79268
319589	38.518	1.5959	0.187		20.2602	16.0877	3.80081
319790	38.524	1.5969	0.1873		20.2634	16.0978	3.80691
319990	38.54	1.598	0.1876		20.2718	16.1089	3.81301
320190	38.552	1.5991	0.1881		20.2781	16.12	3.82317
320391	38.556	1.6	0.1885		20.2802	16.129	3.8313
320591	38.558	1.601	0.1889		20.2812	16.1391	3.83943
320793	38.56	1.6019	0.1891		20.2823	16.1482	3.8435
320994	38.57	1.603	0.1895		20.2875	16.1593	3.85163
321194	38.58	1.6039	0.1898		20.2928	16.1683	3.85772
321395	38.588	1.605	0.1902		20.297	16.1794	3.86585
321595	38.6	1.6059	0.1905		20.3033	16.1885	3.87195
321795	38.612	1.607	0.1909		20.3096	16.1996	3.88008
321996	38.618	1.6079	0.1913		20.3128	16.2087	3.88821
322196	38.626	1.6088	0.1916		20.317	16.2177	3.89431
322397	38.634	1.6099	0.1919		20.3212	16.2288	3.90041
322597	38.642	1.6108	0.1923		20.3254	16.2379	3.90854
322797	38.654	1.6119	0.1927		20.3317	16.249	3.91667
322998	38.664	1.613	0.193		20.337	16.2601	3.92276
323198	38.674	1.614	0.1934		20.3423	16.2702	3.93089
323399	38.686	1.615	0.1937		20.3486	16.2802	3.93699
323599	38.69	1.6159	0.194		20.3507	16.2893	3.94309
323799	38.694	1.6169	0.1944		20.3528	16.2994	3.95122
324000	38.702	1.6178	0.1948		20.357	16.3085	3.95935
324200	38.714	1.6188	0.1951		20.3633	16.3185	3.96545
324400	38.724	1.6199	0.1955		20.3686	16.3296	3.97358
324601	38.734	1.6209	0.196		20.3738	16.3397	3.98374
324801	38.742	1.622	0.1962		20.378	16.3508	3.9878
325003	38.752	1.6228	0.1966		20.3833	16.3589	3.99593
325204	38.764	1.6239	0.197		20.3896	16.37	4.00407
325404	38.78	1.6249	0.1973		20.398	16.38	4.01016
325605	38.796	1.6261	0.1978		20.4064	16.3921	4.02033
325805	38.796	1.6268	0.1981		20.4064	16.3992	4.02642
326005	38.804	1.628	0.1984		20.4106	16.4113	4.03252
326206	38.81	1.6289	0.1988		20.4138	16.4204	4.04065
326406	38.814	1.63	0.1991		20.4159	16.4315	4.04675
326607	38.816	1.6311	0.1995		20.4169	16.4425	4.05488
326807	38.82	1.6319	0.1999		20.419	16.4506	4.06301
327007	38.83	1.633	0.2002		20.4243	16.4617	4.06911
327208	38.838	1.6339	0.2006		20.4285	16.4708	4.07724
327408	38.846	1.6349	0.2008		20.4327	16.4808	4.0813
327608	38.856	1.636	0.2013		20.438	16.4919	4.09146
327809	38.864	1.6371	0.2016		20.4422	16.503	4.09756
328009	38.868	1.638	0.202		20.4443	16.5121	4.10569
328211	38.874	1.639	0.2024		20.4474	16.5222	4.11382
328412	38.876	1.6399	0.2027		20.4485	16.5312	4.11992
328612	38.882	1.641	0.2032		20.4517	16.5423	4.13008
328813	38.858	1.6419	0.2034		20.439	16.5514	4.13415
329013	38.844	1.6429	0.2037		20.4317	16.5615	4.14024
329213	38.842	1.6439	0.2041		20.4306	16.5716	4.14837
329414	38.838	1.6451	0.2045		20.4285	16.5837	4.1565
329614	38.836	1.646	0.205		20.4275	16.5927	4.16667
329815	38.84	1.647	0.2053		20.4296	16.6028	4.17276
330015	38.846	1.6479	0.2056		20.4327	16.6119	4.17886
330215	38.85	1.649	0.206		20.4348	16.623	4.18699
330416	38.854	1.65	0.2064		20.4369	16.6331	4.19512
330616	38.86	1.651	0.2067		20.4401	16.6431	4.20122
330816	38.866	1.6519	0.2071		20.4432	16.6522	4.20935
331017	38.878	1.6529	0.2074		20.4496	16.6623	4.21545
331217	38.88	1.6539	0.2077		20.4506	16.6724	4.22154
331419	38.886	1.6548	0.2081		20.4538	16.6815	4.22967
331620	38.892	1.6559	0.2085		20.4569	16.6925	4.2378
331820	38.89	1.6568	0.2088		20.4559	16.7016	4.2439
332021	38.894	1.6579	0.2092		20.458	16.7127	4.25203
332221	38.902	1.659	0.2096		20.4622	16.7238	4.26016
332421	38.908	1.66	0.2099		20.4653	16.7339	4.26626
332622	38.91	1.6609	0.2103		20.4664	16.7429	4.27439
332822	38.922	1.662	0.2106		20.4727	16.754	4.28049
333023	38.926	1.663	0.211		20.4748	16.7641	4.28862
333223	38.932	1.6641	0.2114		20.478	16.7752	4.29675
333423	38.928	1.6649	0.2117		20.4759	16.7833	4.30285
333624	38.93	1.6659	0.2121		20.4769	16.7933	4.31098
333824	38.934	1.6668	0.2124		20.479	16.8024	4.31707
334024	38.946	1.668	0.2127		20.4853	16.8145	4.32317
334225	38.952	1.669	0.2131		20.4885	16.8246	4.3313
334425	38.944	1.67	0.2135		20.4843	16.8347	4.33943
334627	38.944	1.671	0.2138		20.4843	16.8448	4.34553
334828	38.95	1.672	0.2142		20.4874	16.8548	4.35366
335028	38.96	1.6729	0.2147		20.4927	16.8639	4.36382
335229	38.962	1.6739	0.2151		20.4937	16.874	4.37195
335429	38.97	1.675	0.2153		20.4979	16.8851	4.37602
335629	38.972	1.676	0.2157		20.499	16.8952	4.38415
335830	38.972	1.677	0.2161		20.499	16.9052	4.39228
336030	38.978	1.6779	0.2163		20.5022	16.9143	4.39634
336231	38.98	1.679	0.2167		20.5032	16.9254	4.40447
336431	38.984	1.6799	0.2171		20.5053	16.9345	4.4126
336631	38.994	1.6809	0.2174		20.5106	16.9446	4.4187
336832	39.002	1.6819	0.2178		20.5148	16.9546	4.42683
337032	39.004	1.6828	0.2181		20.5158	16.9637	4.43293
337232	39.01	1.6839	0.2185		20.519	16.9748	4.44106
337433	39.014	1.6851	0.2189		20.5211	16.9869	4.44919
337633	39.024	1.6861	0.2193		20.5263	16.997	4.45732
337835	39.028	1.687	0.2197		20.5285	17.006	4.46545
338036	39.032	1.6882	0.2201		20.5306	17.0181	4.47358
338236	39.036	1.689	0.2204		20.5327	17.0262	4.47967
338437	39.038	1.69	0.2208		20.5337	17.0363	4.4878
338637	39.038	1.691	0.2212		20.5337	17.0464	4.49593
338837	39.042	1.692	0.2216		20.5358	17.0565	4.50407
339038	39.05	1.693	0.222		20.54	17.0665	4.5122
339238	39.06	1.6939	0.2224		20.5453	17.0756	4.52033
339439	39.068	1.695	0.2227		20.5495	17.0867	4.52642
339639	39.076	1.6961	0.2231		20.5537	17.0978	4.53455
339839	39.08	1.6971	0.2234		20.5558	17.1079	4.54065
340040	39.084	1.6982	0.2238		20.5579	17.119	4.54878
340240	39.086	1.6991	0.2242		20.559	17.128	4.55691
340440	39.092	1.7002	0.2246		20.5621	17.1391	4.56504
340641	39.09	1.7011	0.225		20.5611	17.1482	4.57317
340841	39.088	1.702	0.2254		20.56	17.1573	4.5813
341043	39.09	1.703	0.2258		20.5611	17.1673	4.58943
341244	39.098	1.7039	0.2262		20.5653	17.1764	4.59756
341444	39.1	1.7049	0.2266		20.5663	17.1865	4.60569
341645	39.11	1.706	0.227		20.5716	17.1976	4.61382
341845	39.118	1.707	0.2273		20.5758	17.2077	4.61992
342045	39.122	1.708	0.2277		20.5779	17.2177	4.62805
342246	39.13	1.709	0.2281		20.5821	17.2278	4.63618
342446	39.134	1.71	0.2285		20.5842	17.2379	4.64431
342647	39.13	1.7109	0.2289		20.5821	17.247	4.65244
342847	39.14	1.7119	0.2293		20.5874	17.2571	4.66057
343047	39.152	1.713	0.2297		20.5937	17.2681	4.6687
343248	39.154	1.714	0.23		20.5947	17.2782	4.6748
343448	39.166	1.715	0.2304		20.601	17.2883	4.68293
343649	39.162	1.716	0.2308		20.5989	17.2984	4.69106
343849	39.17	1.7171	0.2311		20.6031	17.3095	4.69715
344049	39.176	1.7181	0.2316		20.6063	17.3196	4.70732
344250	39.184	1.719	0.2319		20.6105	17.3286	4.71341
344450	39.184	1.72	0.2323		20.6105	17.3387	4.72154
344650	39.188	1.721	0.2327		20.6126	17.3488	4.72967
344851	39.19	1.722	0.233		20.6137	17.3589	4.73577
345051	39.19	1.7229	0.2333		20.6137	17.3679	4.74187
345253	39.202	1.724	0.2337		20.62	17.379	4.75
345454	39.208	1.7249	0.2341		20.6231	17.3881	4.75813
345654	39.206	1.726	0.2345		20.6221	17.3992	4.76626
345855	39.202	1.7271	0.2348		20.62	17.4103	4.77236
346055	39.214	1.728	0.2353		20.6263	17.4194	4.78252
346255	39.218	1.7291	0.2357		20.6284	17.4304	4.79065
346456	39.214	1.7301	0.2362		20.6263	17.4405	4.80081
346656	39.224	1.7312	0.2366		20.6315	17.4516	4.80894
346857	39.228	1.732	0.237		20.6337	17.4597	4.81707
347057	39.228	1.7331	0.2373		20.6337	17.4708	4.82317
347257	39.228	1.7341	0.2378		20.6337	17.4808	4.83333
347458	39.224	1.735	0.2381		20.6315	17.4899	4.83943
347658	39.23	1.736	0.2386		20.6347	17.5	4.84959
347858	39.23	1.7369	0.2388		20.6347	17.5091	4.85366
348059	39.232	1.7381	0.2392		20.6358	17.5212	4.86179
348259	39.24	1.7391	0.2397		20.64	17.5312	4.87195
348461	39.244	1.74	0.24		20.6421	17.5403	4.87805
348662	39.246	1.7411	0.2404		20.6431	17.5514	4.88618
348862	39.248	1.7421	0.2408		20.6442	17.5615	4.89431
349063	39.256	1.7431	0.2413		20.6484	17.5716	4.90447
349263	39.256	1.744	0.2416		20.6484	17.5806	4.91057
349463	39.252	1.7451	0.2421		20.6463	17.5917	4.92073
349664	39.252	1.7461	0.2424		20.6463	17.6018	4.92683
349864	39.256	1.7469	0.2428		20.6484	17.6099	4.93496
350065	39.262	1.7482	0.2432		20.6515	17.623	4.94309
350265	39.254	1.749	0.2437		20.6473	17.631	4.95325
350465	39.264	1.7501	0.2441		20.6526	17.6421	4.96138
350666	39.274	1.7512	0.2445		20.6578	17.6532	4.96951
350866	39.27	1.7523	0.2449		20.6557	17.6643	4.97764
351066	39.27	1.753	0.2453		20.6557	17.6714	4.98577
351267	39.274	1.7541	0.2457		20.6578	17.6825	4.9939
351467	39.278	1.7551	0.2461		20.66	17.6925	5.00203
351669	39.276	1.7561	0.2464		20.6589	17.7026	5.00813
351870	39.28	1.7572	0.2468		20.661	17.7137	5.01626
352070	39.284	1.7581	0.2473		20.6631	17.7228	5.02642
352271	39.284	1.7591	0.2476		20.6631	17.7329	5.03252
352471	39.282	1.7601	0.2481		20.6621	17.7429	5.04268
352671	39.286	1.7612	0.2484		20.6642	17.754	5.04878
352872	39.29	1.762	0.2488		20.6663	17.7621	5.05691
353072	39.296	1.7631	0.2492		20.6694	17.7732	5.06504
353273	39.296	1.7641	0.2496		20.6694	17.7833	5.07317
353473	39.3	1.7652	0.25		20.6715	17.7944	5.0813
353673	39.306	1.7662	0.2505		20.6747	17.8044	5.09146
353874	39.31	1.7672	0.2508		20.6768	17.8145	5.09756
354074	39.304	1.7682	0.2513		20.6736	17.8246	5.10772
354274	39.302	1.7692	0.2518		20.6726	17.8347	5.11789
354475	39.31	1.7701	0.2521		20.6768	17.8438	5.12398
354675	39.32	1.7711	0.2525		20.682	17.8538	5.13211
354877	39.32	1.7722	0.2529		20.682	17.8649	5.14024
355078	39.324	1.7732	0.2533		20.6841	17.875	5.14837
355278	39.328	1.774	0.2537		20.6863	17.8831	5.1565
355479	39.324	1.7752	0.2541		20.6841	17.8952	5.16463
355679	39.326	1.7762	0.2545		20.6852	17.9052	5.17276
355879	39.322	1.7771	0.2549		20.6831	17.9143	5.18089
356080	39.328	1.7781	0.2553		20.6863	17.9244	5.18902
356280	39.328	1.7792	0.2556		20.6863	17.9355	5.19512
356481	39.332	1.7801	0.2561		20.6884	17.9446	5.20528
356681	39.34	1.7811	0.2565		20.6926	17.9546	5.21341
356881	39.34	1.7822	0.2569		20.6926	17.9657	5.22154
357082	39.348	1.7831	0.2573		20.6968	17.9748	5.22967
357282	39.356	1.7844	0.2577		20.701	17.9879	5.2378
357482	39.362	1.7853	0.2581		20.7041	17.997	5.24593
357683	39.356	1.7862	0.2585		20.701	18.006	5.25407
357883	39.36	1.7872	0.2591		20.7031	18.0161	5.26626
358085	39.362	1.7882	0.2595		20.7041	18.0262	5.27439
358286	39.362	1.7892	0.2598		20.7041	18.0363	5.28049
358486	39.366	1.7902	0.2602		20.7062	18.0464	5.28862
358687	39.364	1.7912	0.2606		20.7052	18.0565	5.29675
358887	39.362	1.7921	0.261		20.7041	18.0655	5.30488
359087	39.368	1.7932	0.2613		20.7073	18.0766	5.31098
359288	39.376	1.7942	0.2618		20.7115	18.0867	5.32114
359488	39.38	1.7951	0.2622		20.7136	18.0958	5.32927
359689	39.382	1.7961	0.2625		20.7147	18.1058	5.33537
359889	39.39	1.7972	0.263		20.7189	18.1169	5.34553
360089	39.392	1.7981	0.2633		20.7199	18.126	5.35163
360290	39.392	1.7991	0.2638		20.7199	18.1361	5.36179
360490	39.396	1.8002	0.2642		20.722	18.1472	5.36992
360690	39.396	1.8012	0.2646		20.722	18.1573	5.37805
360891	39.398	1.8022	0.265		20.7231	18.1673	5.38618
361091	39.396	1.8032	0.2655		20.722	18.1774	5.39634
361293	39.4	1.8042	0.2658		20.7241	18.1875	5.40244
361494	39.398	1.8052	0.2664		20.7231	18.1976	5.41463
361694	39.406	1.8062	0.2668		20.7273	18.2077	5.42276
361895	39.406	1.8072	0.2672		20.7273	18.2177	5.43089
362095	39.412	1.8083	0.2676		20.7304	18.2288	5.43902
362295	39.414	1.8093	0.268		20.7315	18.2389	5.44715
362496	39.41	1.8102	0.2684		20.7294	18.248	5.45528
362696	39.402	1.8112	0.2687		20.7252	18.2581	5.46138
362897	39.406	1.8122	0.2692		20.7273	18.2681	5.47154
363097	39.41	1.8131	0.2696		20.7294	18.2772	5.47967
363297	39.414	1.8142	0.27		20.7315	18.2883	5.4878
363498	39.416	1.8153	0.2704		20.7325	18.2994	5.49593
363698	39.414	1.8163	0.2708		20.7315	18.3095	5.50407
363899	39.41	1.8172	0.2713		20.7294	18.3185	5.51423
364099	39.408	1.8183	0.2717		20.7283	18.3296	5.52236
364299	39.41	1.8192	0.272		20.7294	18.3387	5.52846
364500	39.41	1.8202	0.2725		20.7294	18.3488	5.53862
364700	39.414	1.8212	0.2729		20.7315	18.3589	5.54675
364900	39.41	1.8223	0.2733		20.7294	18.37	5.55488
365101	39.416	1.8232	0.2738		20.7325	18.379	5.56504
365301	39.42	1.8243	0.2743		20.7346	18.3901	5.5752
365503	39.42	1.8253	0.2747		20.7346	18.4002	5.58333
365704	39.424	1.8263	0.2751		20.7367	18.4103	5.59146
365904	39.422	1.8272	0.2756		20.7357	18.4194	5.60163
366105	39.418	1.8283	0.276		20.7336	18.4304	5.60976
366305	39.416	1.8292	0.2764		20.7325	18.4395	5.61789
366505	39.418	1.8303	0.2768		20.7336	18.4506	5.62602
366706	39.418	1.8313	0.2772		20.7336	18.4607	5.63415
366906	39.42	1.8323	0.2775		20.7346	18.4708	5.64024
367107	39.418	1.8334	0.278		20.7336	18.4819	5.65041
367307	39.416	1.8344	0.2784		20.7325	18.4919	5.65854
367507	39.416	1.8353	0.2788		20.7325	18.501	5.66667
367708	39.408	1.8363	0.2793		20.7283	18.5111	5.67683
367908	39.406	1.8374	0.2797		20.7273	18.5222	5.68496
368108	39.398	1.8382	0.2801		20.7231	18.5302	5.69309
368309	39.4	1.8392	0.2805		20.7241	18.5403	5.70122
368509	39.404	1.8402	0.2809		20.7262	18.5504	5.70935
368711	39.41	1.8413	0.2813		20.7294	18.5615	5.71748
368912	39.41	1.8424	0.2819		20.7294	18.5726	5.72967
369112	39.406	1.8433	0.2823		20.7273	18.5817	5.7378
369313	39.4	1.8444	0.2829		20.7241	18.5927	5.75
369513	39.392	1.8454	0.2832		20.7199	18.6028	5.7561
369713	39.388	1.8462	0.2836		20.7178	18.6109	5.76423
369914	39.386	1.8473	0.2839		20.7168	18.622	5.77033
370114	39.392	1.8484	0.2843		20.7199	18.6331	5.77846
370315	39.392	1.8493	0.2848		20.7199	18.6421	5.78862
370515	39.394	1.8503	0.2853		20.721	18.6522	5.79878
370715	39.392	1.8513	0.2857		20.7199	18.6623	5.80691
370916	39.382	1.8523	0.2861		20.7147	18.6724	5.81504
371116	39.372	1.8533	0.2864		20.7094	18.6825	5.82114
371316	39.372	1.8544	0.2869		20.7094	18.6935	5.8313
371517	38.956	1.8563	0.2873		20.4906	18.7127	5.83943
371717	38.744	1.8567	0.288		20.3791	18.7167	5.85366
371919	38.61	1.857	0.2886		20.3086	18.7198	5.86585
372120	38.558	1.8576	0.2893		20.2812	18.7258	5.88008
372320	38.584	1.8591	0.2899		20.2949	18.7409	5.89228
372521	38.6	1.8604	0.2905		20.3033	18.754	5.90447
372721	38.6	1.8616	0.291		20.3033	18.7661	5.91463
372921	38.592	1.8626	0.2916		20.2991	18.7762	5.92683
373122	38.576	1.8635	0.2922		20.2907	18.7853	5.93902
373322	38.566	1.8646	0.2927		20.2854	18.7964	5.94919
373523	38.55	1.8655	0.2931		20.277	18.8054	5.95732
373723	38.538	1.8665	0.2935		20.2707	18.8155	5.96545
373923	38.536	1.8676	0.294		20.2697	18.8266	5.97561
374124	38.528	1.8685	0.2944		20.2655	18.8357	5.98374
374324	38.516	1.8695	0.2949		20.2591	18.8458	5.9939
374524	38.512	1.8704	0.2953		20.257	18.8548	6.00203
374725	38.518	1.8715	0.2958		20.2602	18.8659	6.0122
374925	38.518	1.8723	0.2962		20.2602	18.874	6.02033
375127	38.522	1.8734	0.2967		20.2623	18.8851	6.03049
375328	38.522	1.8744	0.2971		20.2623	18.8952	6.03862
375528	38.528	1.8755	0.2975		20.2655	18.9062	6.04675
375729	38.522	1.8763	0.2979		20.2623	18.9143	6.05488
375929	38.522	1.8774	0.2983		20.2623	18.9254	6.06301
376129	38.524	1.8783	0.2988		20.2634	18.9345	6.07317
376330	38.524	1.8794	0.2991		20.2634	18.9456	6.07927
376530	38.524	1.8806	0.2996		20.2634	18.9577	6.08943
376731	38.526	1.8814	0.3001		20.2644	18.9657	6.09959
376931	38.528	1.8824	0.3006		20.2655	18.9758	6.10976
377131	38.53	1.8834	0.301		20.2665	18.9859	6.11789
377332	38.534	1.8844	0.3014		20.2686	18.996	6.12602
377532	38.546	1.8854	0.3019		20.2749	19.006	6.13618
377732	38.546	1.8864	0.3023		20.2749	19.0161	6.14431
377933	38.542	1.8874	0.3027		20.2728	19.0262	6.15244
378133	38.548	1.8884	0.3031		20.276	19.0363	6.16057
378335	38.552	1.8894	0.3035		20.2781	19.0464	6.1687
378536	38.548	1.8905	0.304		20.276	19.0575	6.17886
378736	38.552	1.8915	0.3043		20.2781	19.0675	6.18496
378937	38.558	1.8926	0.3048		20.2812	19.0786	6.19512
379137	38.556	1.8934	0.3052		20.2802	19.0867	6.20325
379337	38.554	1.8944	0.3056		20.2791	19.0968	6.21138
379538	38.554	1.8954	0.306		20.2791	19.1069	6.21951
379738	38.558	1.8965	0.3064		20.2812	19.1179	6.22764
379939	38.556	1.8974	0.3069		20.2802	19.127	6.2378
380139	38.566	1.8984	0.3073		20.2854	19.1371	6.24593
380339	38.568	1.8995	0.3077		20.2865	19.1482	6.25407
380540	38.576	1.9005	0.3081		20.2907	19.1583	6.2622
380740	38.566	1.9015	0.3086		20.2854	19.1683	6.27236
380940	38.56	1.9024	0.3089		20.2823	19.1774	6.27846
381141	38.56	1.9035	0.3095		20.2823	19.1885	6.29065
381341	38.558	1.9044	0.31		20.2812	19.1976	6.30081
381543	38.556	1.9055	0.3103		20.2802	19.2087	6.30691
381744	38.554	1.9065	0.3108		20.2791	19.2188	6.31707
381944	38.554	1.9074	0.3112		20.2791	19.2278	6.3252
382145	38.552	1.9084	0.3116		20.2781	19.2379	6.33333
382345	38.544	1.9095	0.312		20.2739	19.249	6.34146
382545	38.546	1.9105	0.3125		20.2749	19.2591	6.35163
382746	38.546	1.9116	0.3129		20.2749	19.2702	6.35976
382946	38.544	1.9124	0.3133		20.2739	19.2782	6.36789
383147	38.54	1.9133	0.3137		20.2718	19.2873	6.37602
383347	38.54	1.9143	0.3141		20.2718	19.2974	6.38415
383547	38.536	1.9155	0.3146		20.2697	19.3095	6.39431
383748	38.538	1.9165	0.3151		20.2707	19.3196	6.40447
383948	38.538	1.9175	0.3155		20.2707	19.3296	6.4126
384149	38.532	1.9186	0.3159		20.2676	19.3407	6.42073
384349	38.524	1.9195	0.3164		20.2634	19.3498	6.43089
384549	38.528	1.9204	0.3168		20.2655	19.3589	6.43902
384750	38.53	1.9217	0.3172		20.2665	19.372	6.44715
384950	38.532	1.9226	0.3177		20.2676	19.381	6.45732
385150	38.53	1.9236	0.3181		20.2665	19.3911	6.46545
385351	38.522	1.9246	0.3186		20.2623	19.4012	6.47561
385551	38.52	1.9256	0.319		20.2612	19.4113	6.48374
385753	38.516	1.9265	0.3195		20.2591	19.4204	6.4939
385954	38.512	1.9275	0.32		20.257	19.4304	6.50407
386154	38.512	1.9285	0.3206		20.257	19.4405	6.51626
386355	38.52	1.9296	0.3209		20.2612	19.4516	6.52236
386555	38.516	1.9306	0.3214		20.2591	19.4617	6.53252
386755	38.51	1.9317	0.3219		20.256	19.4728	6.54268
386956	38.506	1.9326	0.3223		20.2539	19.4819	6.55081
387156	38.51	1.9337	0.3227		20.256	19.4929	6.55894
387357	38.498	1.9345	0.3232		20.2497	19.501	6.56911
387557	38.494	1.9356	0.3237		20.2476	19.5121	6.57927
387757	38.492	1.9366	0.3241		20.2465	19.5222	6.5874
387958	38.486	1.9374	0.3245		20.2434	19.5302	6.59553
388158	38.488	1.9387	0.3249		20.2444	19.5433	6.60366
388358	38.486	1.9395	0.3254		20.2434	19.5514	6.61382
388559	38.472	1.9404	0.3259		20.236	19.5605	6.62398
388759	38.476	1.9415	0.3263		20.2381	19.5716	6.63211
388961	38.474	1.9426	0.3268		20.2371	19.5827	6.64228
389162	38.456	1.9437	0.3273		20.2276	19.5938	6.65244
389362	38.328	1.945	0.3278		20.1603	19.6069	6.6626
389563	38.276	1.9459	0.3283		20.1329	19.6159	6.67276
389763	38.238	1.9468	0.3289		20.1129	19.625	6.68496
389963	38.212	1.9477	0.3294		20.0992	19.6341	6.69512
390164	38.2	1.9485	0.3299		20.0929	19.6421	6.70528
390364	38.184	1.9497	0.3304		20.0845	19.6542	6.71545
390565	38.176	1.9505	0.3308		20.0803	19.6623	6.72358
390765	38.17	1.9515	0.3314		20.0772	19.6724	6.73577
390965	38.168	1.9525	0.3318		20.0761	19.6825	6.7439
391166	38.162	1.9536	0.3323		20.0729	19.6935	6.75407
391366	38.16	1.9548	0.3328		20.0719	19.7056	6.76423
391566	38.156	1.9556	0.3333		20.0698	19.7137	6.77439
391767	38.154	1.9566	0.3337		20.0687	19.7238	6.78252
391967	38.15	1.9577	0.3343		20.0666	19.7349	6.79472
392169	38.142	1.9585	0.3346		20.0624	19.7429	6.80081
392370	38.138	1.9596	0.3351		20.0603	19.754	6.81098
392570	38.136	1.9605	0.3355		20.0593	19.7631	6.81911
392771	38.132	1.9615	0.336		20.0572	19.7732	6.82927
392971	38.134	1.9625	0.3365		20.0582	19.7833	6.83943
393171	38.136	1.9636	0.3369		20.0593	19.7944	6.84756
393372	38.136	1.9646	0.3374		20.0593	19.8044	6.85772
393572	38.136	1.9657	0.3378		20.0593	19.8155	6.86585
393773	38.138	1.9665	0.3383		20.0603	19.8236	6.87602
393973	38.138	1.9676	0.3388		20.0603	19.8347	6.88618
394173	38.138	1.9687	0.3392		20.0603	19.8458	6.89431
394374	38.126	1.9697	0.3397		20.054	19.8558	6.90447
394574	38.12	1.9708	0.3402		20.0509	19.8669	6.91463
394774	38.114	1.9716	0.3406		20.0477	19.875	6.92276
394975	38.108	1.9726	0.3411		20.0445	19.8851	6.93293
395175	38.112	1.9736	0.3416		20.0466	19.8952	6.94309
395377	38.114	1.9746	0.3421		20.0477	19.9052	6.95325
395578	38.108	1.9756	0.3425		20.0445	19.9153	6.96138
395778	38.112	1.9767	0.3428		20.0466	19.9264	6.96748
395979	38.11	1.9777	0.3433		20.0456	19.9365	6.97764
396179	38.052	1.9787	0.3437		20.0151	19.9466	6.98577
396379	37.876	1.9801	0.3445		19.9225	19.9607	7.00203
396580	37.336	1.9823	0.346		19.6385	19.9829	7.03252
396780	36.506	1.9807	0.3485		19.2019	19.9667	7.08333
396981	36.642	1.9832	0.3505		19.2734	19.9919	7.12398
397181	36.434	1.9834	0.3518		19.164	19.994	7.15041
397381	36.456	1.9848	0.3528		19.1756	20.0081	7.17073
397582	36.404	1.986	0.3538		19.1482	20.0202	7.19106
397782	36.34	1.9868	0.3545		19.1146	20.0282	7.20528
397982	36.296	1.9877	0.3552		19.0914	20.0373	7.21951
398183	36.272	1.9886	0.3558		19.0788	20.0464	7.23171
398383	36.256	1.9896	0.3564		19.0704	20.0565	7.2439
398585	36.23	1.9907	0.3569		19.0567	20.0675	7.25407
398786	36.206	1.9917	0.3575		19.0441	20.0776	7.26626
398986	36.186	1.9926	0.358		19.0336	20.0867	7.27642
399187	36.178	1.9937	0.3585		19.0294	20.0978	7.28659
399387	36.17	1.9948	0.359		19.0252	20.1089	7.29675
399587	36.16	1.9957	0.3594		19.0199	20.1179	7.30488
[truncated: 408 more rows]

## Sheet: 45A-6-B
17:31:24,07/02/2019
diameter: 49.1	mm	height: 99.9	mm
Vertical 100kN force sensor (vertical force of test piece)
Control mode: displacement	Waveform: ramp
mm/s	End point: 2.1781	mm
time (ms)	vertical force (KN)	vertical deformation (mm)	transverse deformation (mm)		stress	axial strain	transverse strain
0	0	0	0		0	0	0
200	0.02	0.0006	-0.0001		0.0105628	0.00600601	-0.00203666
400	0.062	0.0021	0		0.0327445	0.021021	0
600	0.084	0.0031	0		0.0443636	0.031031	0
801	0.102	0.0042	0		0.05387	0.042042	0
1003	0.116	0.0051	-0.0001		0.061264	0.0510511	-0.00203666
1204	0.126	0.0059	0.0001		0.0665453	0.0590591	0.00203666
1404	0.14	0.0066	0.0001		0.0739393	0.0660661	0.00203666
1604	0.152	0.0073	0.0002		0.0802769	0.0730731	0.00407332
1804	0.192	0.0093	0.0002		0.101402	0.0930931	0.00407332
2005	0.206	0.0103	0.0004		0.108796	0.103103	0.00814664
2206	0.218	0.011	0.0004		0.115134	0.11011	0.00814664
2406	0.236	0.012	0.0004		0.12464	0.12012	0.00814664
2606	0.26	0.0132	0.0005		0.137316	0.132132	0.0101833
2806	0.278	0.0143	0.0005		0.146822	0.143143	0.0101833
3007	0.292	0.0154	0.0006		0.154216	0.154154	0.01222
3208	0.308	0.0165	0.0008		0.162666	0.165165	0.0162933
3408	0.326	0.0173	0.0008		0.172173	0.173173	0.0162933
3608	0.342	0.0183	0.0008		0.180623	0.183183	0.0162933
3808	0.358	0.0192	0.0009		0.189073	0.192192	0.0183299
4009	0.372	0.0201	0.001		0.196467	0.201201	0.0203666
4211	0.392	0.0211	0.001		0.20703	0.211211	0.0203666
4412	0.406	0.0222	0.0011		0.214424	0.222222	0.0224033
4612	0.424	0.0232	0.0011		0.22393	0.232232	0.0224033
4812	0.442	0.0242	0.0012		0.233437	0.242242	0.0244399
5012	0.462	0.0253	0.0012		0.244	0.253253	0.0244399
5213	0.476	0.0261	0.0014		0.251394	0.261261	0.0285132
5414	0.492	0.0273	0.0013		0.259844	0.273273	0.0264766
5614	0.51	0.0281	0.0013		0.26935	0.281281	0.0264766
5814	0.526	0.0291	0.0014		0.2778	0.291291	0.0285132
6014	0.546	0.0302	0.0014		0.288363	0.302302	0.0285132
6215	0.56	0.0311	0.0015		0.295757	0.311311	0.0305499
6416	0.574	0.032	0.0015		0.303151	0.32032	0.0305499
6616	0.594	0.033	0.0016		0.313714	0.33033	0.0325866
6816	0.61	0.034	0.0017		0.322164	0.34034	0.0346232
7016	0.63	0.0349	0.0017		0.332727	0.349349	0.0346232
7217	0.646	0.036	0.0018		0.341177	0.36036	0.0366599
7419	0.672	0.0369	0.0018		0.354909	0.369369	0.0366599
7620	0.694	0.0381	0.0019		0.366528	0.381381	0.0386965
7820	0.71	0.0392	0.002		0.374978	0.392392	0.0407332
8020	0.73	0.0402	0.0021		0.38554	0.402402	0.0427699
8220	0.748	0.0412	0.0021		0.395047	0.412412	0.0427699
8421	0.764	0.0422	0.0022		0.403497	0.422422	0.0448065
8622	0.784	0.0431	0.0024		0.41406	0.431431	0.0488798
8822	0.806	0.0441	0.0024		0.425679	0.441441	0.0488798
9022	0.822	0.0451	0.0023		0.434129	0.451451	0.0468432
9222	0.84	0.0461	0.0025		0.443636	0.461461	0.0509165
9423	0.86	0.047	0.0026		0.454198	0.47047	0.0529532
9624	0.878	0.0481	0.0026		0.463705	0.481481	0.0529532
9824	0.902	0.0489	0.0026		0.47638	0.489489	0.0529532
10024	0.92	0.05	0.0027		0.485887	0.500501	0.0549898
10224	0.938	0.0511	0.0028		0.495393	0.511512	0.0570265
10425	0.962	0.0521	0.0028		0.508068	0.521522	0.0570265
10627	0.98	0.053	0.0029		0.517575	0.530531	0.0590631
10828	1	0.054	0.003		0.528138	0.540541	0.0610998
11028	1.018	0.0549	0.003		0.537644	0.54955	0.0610998
11228	1.036	0.0559	0.0031		0.547151	0.55956	0.0631365
11428	1.058	0.057	0.0031		0.55877	0.570571	0.0631365
11629	1.078	0.058	0.0032		0.569332	0.580581	0.0651731
11830	1.1	0.059	0.0034		0.580951	0.590591	0.0692464
12030	1.122	0.0601	0.0034		0.59257	0.601602	0.0692464
12230	1.144	0.0611	0.0034		0.604189	0.611612	0.0692464
12430	1.164	0.0621	0.0035		0.614752	0.621622	0.0712831
12631	1.184	0.0631	0.0036		0.625315	0.631632	0.0733198
12832	1.21	0.0641	0.0037		0.639047	0.641642	0.0753564
13032	1.234	0.0652	0.0037		0.651722	0.652653	0.0753564
13232	1.254	0.066	0.0037		0.662285	0.660661	0.0753564
13432	1.276	0.0672	0.0039		0.673904	0.672673	0.0794297
13633	1.302	0.0682	0.0039		0.687635	0.682683	0.0794297
13835	1.324	0.0694	0.0041		0.699254	0.694695	0.0835031
14036	1.34	0.0703	0.0042		0.707704	0.703704	0.0855397
14236	1.36	0.0712	0.0041		0.718267	0.712713	0.0835031
14436	1.38	0.0722	0.0042		0.72883	0.722723	0.0855397
14636	1.4	0.0731	0.0043		0.739393	0.731732	0.0875764
14837	1.422	0.0741	0.0044		0.751012	0.741742	0.089613
15038	1.446	0.0752	0.0045		0.763687	0.752753	0.0916497
15238	1.468	0.0763	0.0047		0.775306	0.763764	0.095723
15438	1.49	0.0773	0.0047		0.786925	0.773774	0.095723
15638	1.514	0.0783	0.0048		0.7996	0.783784	0.0977597
15839	1.536	0.0793	0.0049		0.811219	0.793794	0.0997963
16040	1.554	0.0803	0.0049		0.820726	0.803804	0.0997963
16240	1.576	0.0814	0.005		0.832345	0.814815	0.101833
16440	1.598	0.0822	0.0051		0.843964	0.822823	0.10387
16640	1.622	0.0834	0.0051		0.856639	0.834835	0.10387
16841	1.642	0.0842	0.0052		0.867202	0.842843	0.105906
17043	1.662	0.0854	0.0051		0.877765	0.854855	0.10387
17244	1.684	0.0864	0.0052		0.889384	0.864865	0.105906
17444	1.708	0.0873	0.0053		0.902059	0.873874	0.107943
17644	1.734	0.0884	0.0053		0.915791	0.884885	0.107943
17844	1.756	0.0894	0.0054		0.92741	0.894895	0.10998
18045	1.78	0.0904	0.0054		0.940085	0.904905	0.10998
18246	1.802	0.0915	0.0055		0.951704	0.915916	0.112016
18446	1.826	0.0925	0.0056		0.964379	0.925926	0.114053
18646	1.844	0.0936	0.0056		0.973886	0.936937	0.114053
18846	1.872	0.0946	0.0057		0.988674	0.946947	0.11609
19047	1.89	0.0955	0.0056		0.99818	0.955956	0.114053
19248	1.914	0.0966	0.0058		1.01086	0.966967	0.118126
19448	1.938	0.0978	0.0058		1.02353	0.978979	0.118126
19648	1.954	0.0986	0.0059		1.03198	0.986987	0.120163
19848	1.974	0.0996	0.006		1.04254	0.996997	0.1222
20049	1.996	0.1006	0.006		1.05416	1.00701	0.1222
20250	2.018	0.1015	0.0061		1.06578	1.01602	0.124236
20450	2.04	0.1024	0.006		1.0774	1.02503	0.1222
20650	2.06	0.1034	0.0061		1.08796	1.03504	0.124236
20850	2.084	0.1044	0.006		1.10064	1.04505	0.1222
21051	2.108	0.1054	0.0061		1.11331	1.05506	0.124236
21253	2.132	0.1065	0.0061		1.12599	1.06607	0.124236
21454	2.152	0.1076	0.0062		1.13655	1.07708	0.126273
21654	2.174	0.1085	0.0063		1.14817	1.08609	0.12831
21854	2.194	0.1094	0.0062		1.15873	1.0951	0.126273
22054	2.22	0.1105	0.0064		1.17247	1.10611	0.130346
22255	2.24	0.1114	0.0063		1.18303	1.11512	0.12831
22456	2.264	0.1126	0.0065		1.1957	1.12713	0.132383
22656	2.286	0.1135	0.0066		1.20732	1.13614	0.13442
22856	2.31	0.1144	0.0064		1.22	1.14515	0.130346
23056	2.334	0.1154	0.0066		1.23267	1.15516	0.13442
23257	2.356	0.1165	0.0066		1.24429	1.16617	0.13442
23458	2.378	0.1174	0.0066		1.25591	1.17518	0.13442
23658	2.402	0.1185	0.0067		1.26859	1.18619	0.136456
23858	2.424	0.1194	0.0068		1.28021	1.1952	0.138493
24058	2.446	0.1205	0.0069		1.29182	1.20621	0.14053
24259	2.468	0.1214	0.0069		1.30344	1.21522	0.14053
24461	2.494	0.1224	0.0069		1.31718	1.22523	0.14053
24662	2.516	0.1233	0.007		1.32879	1.23423	0.142566
24862	2.544	0.1243	0.0069		1.34358	1.24424	0.14053
25062	2.566	0.1255	0.0069		1.3552	1.25626	0.14053
25262	2.592	0.1266	0.0069		1.36893	1.26727	0.14053
25463	2.614	0.1274	0.007		1.38055	1.27528	0.142566
25664	2.64	0.1284	0.007		1.39428	1.28529	0.142566
25864	2.664	0.1293	0.0071		1.40696	1.29429	0.144603
26064	2.688	0.1304	0.0072		1.41963	1.30531	0.14664
26264	2.716	0.1315	0.0072		1.43442	1.31632	0.14664
26465	2.742	0.1325	0.0072		1.44815	1.32633	0.14664
26666	2.768	0.1336	0.0073		1.46189	1.33734	0.148676
26866	2.792	0.1345	0.0074		1.47456	1.34635	0.150713
27066	2.814	0.1356	0.0074		1.48618	1.35736	0.150713
27266	2.838	0.1365	0.0074		1.49885	1.36637	0.150713
27467	2.862	0.1375	0.0075		1.51153	1.37638	0.152749
27669	2.888	0.1386	0.0075		1.52526	1.38739	0.152749
27870	2.912	0.1395	0.0076		1.53794	1.3964	0.154786
28070	2.94	0.1405	0.0076		1.55272	1.40641	0.154786
28270	2.968	0.1416	0.0077		1.56751	1.41742	0.156823
28470	2.99	0.1425	0.0077		1.57913	1.42643	0.156823
28671	3.014	0.1435	0.0078		1.59181	1.43644	0.158859
28872	3.04	0.1445	0.0078		1.60554	1.44645	0.158859
29072	3.064	0.1455	0.0077		1.61821	1.45646	0.156823
29272	3.088	0.1465	0.0079		1.63089	1.46647	0.160896
29472	3.116	0.1474	0.0079		1.64568	1.47548	0.160896
29673	3.14	0.1483	0.008		1.65835	1.48448	0.162933
29874	3.166	0.1493	0.008		1.67208	1.49449	0.162933
30074	3.194	0.1503	0.0081		1.68687	1.5045	0.164969
30274	3.224	0.1515	0.008		1.70272	1.51652	0.162933
30474	3.248	0.1524	0.0081		1.71539	1.52553	0.164969
30675	3.276	0.1534	0.0081		1.73018	1.53554	0.164969
30877	3.302	0.1543	0.0082		1.74391	1.54454	0.167006
31078	3.33	0.1553	0.0082		1.7587	1.55455	0.167006
31278	3.354	0.1563	0.0083		1.77137	1.56456	0.169043
31478	3.384	0.1573	0.0084		1.78722	1.57457	0.171079
31678	3.412	0.1583	0.0083		1.80201	1.58458	0.169043
31879	3.436	0.1594	0.0085		1.81468	1.5956	0.173116
32080	3.462	0.1604	0.0085		1.82841	1.60561	0.173116
32280	3.488	0.1612	0.0085		1.84214	1.61361	0.173116
32480	3.516	0.1623	0.0085		1.85693	1.62462	0.173116
32680	3.544	0.1632	0.0086		1.87172	1.63363	0.175153
32881	3.574	0.1642	0.0086		1.88756	1.64364	0.175153
33082	3.602	0.1652	0.0086		1.90235	1.65365	0.175153
33282	3.63	0.1662	0.0087		1.91714	1.66366	0.177189
33482	3.658	0.1673	0.0088		1.93193	1.67467	0.179226
33682	3.69	0.1682	0.0088		1.94883	1.68368	0.179226
33883	3.72	0.1693	0.0089		1.96467	1.69469	0.181263
34085	3.75	0.1701	0.0089		1.98052	1.7027	0.181263
34286	3.784	0.1712	0.0089		1.99847	1.71371	0.181263
34486	3.818	0.1722	0.009		2.01643	1.72372	0.183299
34686	3.858	0.1734	0.0091		2.03756	1.73574	0.185336
34886	3.894	0.1745	0.0092		2.05657	1.74675	0.187373
35087	3.928	0.1756	0.0093		2.07452	1.75776	0.189409
35288	3.954	0.1766	0.0093		2.08826	1.76777	0.189409
35488	3.986	0.1776	0.0092		2.10516	1.77778	0.187373
35688	4.012	0.1785	0.0094		2.11889	1.78679	0.191446
35888	4.042	0.1794	0.0094		2.13473	1.7958	0.191446
36089	4.074	0.1805	0.0095		2.15163	1.80681	0.193483
36290	4.11	0.1815	0.0095		2.17065	1.81682	0.193483
36490	4.136	0.1824	0.0096		2.18438	1.82583	0.195519
36690	4.17	0.1834	0.0097		2.20233	1.83584	0.197556
36890	4.2	0.1844	0.0096		2.21818	1.84585	0.195519
37091	4.232	0.1854	0.0097		2.23508	1.85586	0.197556
37293	4.268	0.1864	0.0097		2.25409	1.86587	0.197556
37494	4.298	0.1874	0.0099		2.26994	1.87588	0.201629
37694	4.332	0.1883	0.0099		2.28789	1.88488	0.201629
37894	4.362	0.1893	0.0099		2.30374	1.89489	0.201629
38094	4.404	0.1903	0.01		2.32592	1.9049	0.203666
38295	4.438	0.1913	0.01		2.34387	1.91491	0.203666
38496	4.472	0.1923	0.0101		2.36183	1.92492	0.205703
38696	4.506	0.1933	0.0102		2.37979	1.93493	0.207739
38896	4.54	0.1943	0.0103		2.39774	1.94494	0.209776
39096	4.572	0.1953	0.0102		2.41465	1.95495	0.207739
39297	4.606	0.1963	0.0102		2.4326	1.96496	0.207739
39498	4.642	0.1973	0.0104		2.45162	1.97497	0.211813
39698	4.678	0.1983	0.0104		2.47063	1.98498	0.211813
39898	4.714	0.1993	0.0105		2.48964	1.99499	0.213849
40098	4.746	0.2002	0.0106		2.50654	2.004	0.215886
40299	4.782	0.2013	0.0107		2.52555	2.01502	0.217923
40500	4.816	0.2024	0.0107		2.54351	2.02603	0.217923
40700	4.848	0.2032	0.0107		2.56041	2.03403	0.217923
40900	4.888	0.2042	0.0108		2.58154	2.04404	0.219959
41100	4.924	0.2054	0.0109		2.60055	2.05606	0.221996
41301	4.96	0.2063	0.0109		2.61956	2.06507	0.221996
41503	4.998	0.2073	0.011		2.63963	2.07508	0.224033
41704	5.034	0.2082	0.011		2.65864	2.08408	0.224033
41904	5.074	0.2092	0.0111		2.67977	2.09409	0.226069
42104	5.108	0.2102	0.0111		2.69773	2.1041	0.226069
42304	5.148	0.2114	0.0113		2.71885	2.11612	0.230143
42505	5.184	0.2123	0.0113		2.73787	2.12513	0.230143
42706	5.218	0.2133	0.0114		2.75582	2.13514	0.232179
42906	5.256	0.2144	0.0114		2.77589	2.14615	0.232179
43106	5.29	0.2153	0.0116		2.79385	2.15516	0.236253
43306	5.328	0.2162	0.0115		2.81392	2.16416	0.234216
43507	5.366	0.2172	0.0117		2.83399	2.17417	0.238289
43708	5.402	0.2184	0.0116		2.853	2.18619	0.236253
43908	5.438	0.2193	0.0117		2.87201	2.1952	0.238289
44108	5.474	0.2203	0.0118		2.89103	2.20521	0.240326
44308	5.508	0.2212	0.0118		2.90898	2.21421	0.240326
44509	5.542	0.2223	0.0119		2.92694	2.22523	0.242363
44711	5.58	0.2232	0.012		2.94701	2.23423	0.244399
44912	5.616	0.2243	0.012		2.96602	2.24525	0.244399
45112	5.66	0.2251	0.0122		2.98926	2.25325	0.248473
45312	5.702	0.2261	0.0122		3.01144	2.26326	0.248473
45512	5.742	0.2273	0.0123		3.03257	2.27528	0.250509
45713	5.778	0.2284	0.0123		3.05158	2.28629	0.250509
45914	5.818	0.2292	0.0124		3.0727	2.29429	0.252546
46114	5.854	0.2303	0.0125		3.09172	2.30531	0.254582
46314	5.894	0.2313	0.0126		3.11284	2.31532	0.256619
46514	5.928	0.2324	0.0126		3.1308	2.32633	0.256619
46715	5.966	0.2334	0.0127		3.15087	2.33634	0.258656
46916	6.004	0.2342	0.0128		3.17094	2.34434	0.260692
47116	6.04	0.2354	0.0127		3.18995	2.35636	0.258656
47316	6.078	0.2363	0.0129		3.21002	2.36537	0.262729
47516	6.116	0.2373	0.0129		3.23009	2.37538	0.262729
47717	6.152	0.2383	0.013		3.2491	2.38539	0.264766
47919	6.192	0.2394	0.0131		3.27023	2.3964	0.266802
48120	6.23	0.2403	0.0132		3.2903	2.40541	0.268839
48320	6.274	0.2412	0.0133		3.31354	2.41441	0.270876
48520	6.318	0.2423	0.0133		3.33677	2.42543	0.270876
48720	6.362	0.2434	0.0134		3.36001	2.43644	0.272912
48921	6.402	0.2446	0.0135		3.38114	2.44845	0.274949
49122	6.444	0.2456	0.0136		3.40332	2.45846	0.276986
49322	6.48	0.2465	0.0136		3.42233	2.46747	0.276986
49522	6.516	0.2475	0.0137		3.44134	2.47748	0.279022
49722	6.55	0.2485	0.0138		3.4593	2.48749	0.281059
49923	6.59	0.2495	0.0139		3.48043	2.4975	0.283096
50124	6.624	0.2505	0.014		3.49838	2.50751	0.285132
50324	6.662	0.2513	0.014		3.51845	2.51552	0.285132
50524	6.704	0.2523	0.014		3.54063	2.52553	0.285132
50724	6.742	0.2535	0.0142		3.5607	2.53754	0.289206
50925	6.78	0.2544	0.0142		3.58077	2.54655	0.289206
51127	6.824	0.2554	0.0143		3.60401	2.55656	0.291242
51328	6.864	0.2564	0.0144		3.62514	2.56657	0.293279
51528	6.898	0.2573	0.0144		3.64309	2.57558	0.293279
51728	6.942	0.2582	0.0145		3.66633	2.58458	0.295316
51928	6.984	0.2594	0.0146		3.68851	2.5966	0.297352
52129	7.022	0.2604	0.0147		3.70858	2.60661	0.299389
52330	7.062	0.2614	0.0147		3.72971	2.61662	0.299389
52530	7.1	0.2624	0.0148		3.74978	2.62663	0.301426
52730	7.144	0.2633	0.0149		3.77302	2.63564	0.303462
52930	7.178	0.2643	0.015		3.79097	2.64565	0.305499
53131	7.22	0.2653	0.015		3.81315	2.65566	0.305499
53332	7.258	0.2664	0.0151		3.83322	2.66667	0.307536
53532	7.298	0.2674	0.0153		3.85435	2.67668	0.311609
53732	7.336	0.2684	0.0153		3.87442	2.68669	0.311609
53932	7.376	0.2693	0.0153		3.89554	2.6957	0.311609
54133	7.414	0.2702	0.0154		3.91561	2.7047	0.313646
54335	7.454	0.2713	0.0155		3.93674	2.71572	0.315682
54536	7.494	0.2722	0.0156		3.95786	2.72472	0.317719
54736	7.536	0.2731	0.0156		3.98005	2.73373	0.317719
54936	7.576	0.2741	0.0158		4.00117	2.74374	0.321792
55136	7.618	0.2753	0.0159		4.02335	2.75576	0.323829
55337	7.66	0.2763	0.0159		4.04553	2.76577	0.323829
55538	7.704	0.2773	0.016		4.06877	2.77578	0.325866
55738	7.754	0.2784	0.016		4.09518	2.78679	0.325866
55938	7.796	0.2794	0.0161		4.11736	2.7968	0.327902
56138	7.838	0.2803	0.0163		4.13954	2.80581	0.331976
56339	7.878	0.2814	0.0164		4.16067	2.81682	0.334012
56540	7.92	0.2824	0.0164		4.18285	2.82683	0.334012
56740	7.956	0.2834	0.0165		4.20186	2.83684	0.336049
56940	7.996	0.2843	0.0166		4.22299	2.84585	0.338086
57140	8.038	0.2854	0.0166		4.24517	2.85686	0.338086
57341	8.078	0.2863	0.0168		4.2663	2.86587	0.342159
57543	8.118	0.2874	0.0169		4.28742	2.87688	0.344196
57744	8.162	0.2883	0.017		4.31066	2.88589	0.346232
57944	8.206	0.2894	0.017		4.3339	2.8969	0.346232
58144	8.252	0.2904	0.0171		4.35819	2.90691	0.348269
58344	8.292	0.2912	0.0172		4.37932	2.91491	0.350305
58545	8.334	0.2923	0.0172		4.4015	2.92593	0.350305
58746	8.374	0.2934	0.0174		4.42262	2.93694	0.354379
58946	8.412	0.2944	0.0174		4.44269	2.94695	0.354379
59146	8.456	0.2954	0.0175		4.46593	2.95696	0.356415
59346	8.496	0.2962	0.0176		4.48706	2.96496	0.358452
59547	8.54	0.2973	0.0177		4.5103	2.97598	0.360489
59748	8.578	0.2984	0.0178		4.53036	2.98699	0.362525
59948	8.622	0.2993	0.0178		4.5536	2.996	0.362525
60148	8.656	0.3004	0.018		4.57156	3.00701	0.366599
60348	8.694	0.3013	0.018		4.59163	3.01602	0.366599
60549	8.734	0.3023	0.0182		4.61275	3.02603	0.370672
60750	8.776	0.3032	0.0181		4.63494	3.03504	0.368635
60950	8.82	0.3042	0.0184		4.65817	3.04505	0.374745
61150	8.862	0.3052	0.0182		4.68036	3.05506	0.370672
61350	8.91	0.3064	0.0184		4.70571	3.06707	0.374745
61551	8.958	0.3074	0.0185		4.73106	3.07708	0.376782
61753	9.008	0.3084	0.0186		4.75746	3.08709	0.378819
61954	9.048	0.3094	0.0187		4.77859	3.0971	0.380855
62154	9.088	0.3106	0.0188		4.79972	3.10911	0.382892
62354	9.128	0.3114	0.0189		4.82084	3.11712	0.384929
62554	9.164	0.3124	0.019		4.83985	3.12713	0.386965
62755	9.206	0.3133	0.0192		4.86204	3.13614	0.391039
62956	9.25	0.3144	0.0192		4.88527	3.14715	0.391039
63156	9.294	0.3154	0.0194		4.90851	3.15716	0.395112
63356	9.334	0.3164	0.0194		4.92964	3.16717	0.395112
63556	9.372	0.3175	0.0195		4.94971	3.17818	0.397149
63757	9.412	0.3182	0.0195		4.97083	3.18519	0.397149
63958	9.454	0.3192	0.0196		4.99301	3.1952	0.399185
64158	9.496	0.3202	0.0197		5.0152	3.20521	0.401222
64358	9.536	0.3213	0.0198		5.03632	3.21622	0.403259
64558	9.58	0.3222	0.0199		5.05956	3.22523	0.405295
64759	9.618	0.3232	0.02		5.07963	3.23524	0.407332
64961	9.664	0.3243	0.0201		5.10392	3.24625	0.409369
65162	9.706	0.3253	0.0202		5.1261	3.25626	0.411405
65362	9.752	0.3262	0.0203		5.1504	3.26527	0.413442
65562	9.794	0.3274	0.0205		5.17258	3.27728	0.417515
65762	9.836	0.3283	0.0206		5.19476	3.28629	0.419552
65963	9.878	0.3293	0.0207		5.21694	3.2963	0.421589
66164	9.922	0.3303	0.0207		5.24018	3.30631	0.421589
66364	9.966	0.3313	0.0208		5.26342	3.31632	0.423625
66564	10.006	0.3322	0.021		5.28455	3.32533	0.427699
66764	10.05	0.3332	0.021		5.30778	3.33534	0.427699
66965	10.094	0.3343	0.0211		5.33102	3.34635	0.429735
67166	10.136	0.3353	0.0213		5.3532	3.35636	0.433809
67366	10.184	0.3364	0.0214		5.37855	3.36737	0.435845
67566	10.242	0.3375	0.0215		5.40919	3.37838	0.437882
67766	10.286	0.3386	0.0215		5.43242	3.38939	0.437882
67967	10.326	0.3396	0.0217		5.45355	3.3994	0.441955
68169	10.366	0.3405	0.0218		5.47467	3.40841	0.443992
68370	10.406	0.3415	0.0219		5.4958	3.41842	0.446029
68570	10.45	0.3424	0.022		5.51904	3.42743	0.448065
68770	10.488	0.3436	0.022		5.53911	3.43944	0.448065
68970	10.528	0.3445	0.0222		5.56023	3.44845	0.452138
69171	10.566	0.3454	0.0223		5.5803	3.45746	0.454175
69372	10.61	0.3464	0.0224		5.60354	3.46747	0.456212
69572	10.658	0.3473	0.0225		5.62889	3.47648	0.458248
69772	10.698	0.3483	0.0227		5.65002	3.48649	0.462322
69972	10.74	0.3494	0.0227		5.6722	3.4975	0.462322
70173	10.786	0.3505	0.0228		5.69649	3.50851	0.464358
70374	10.826	0.3514	0.0228		5.71762	3.51752	0.464358
70574	10.868	0.3525	0.0229		5.7398	3.52853	0.466395
70774	10.91	0.3535	0.023		5.76198	3.53854	0.468432
70974	10.948	0.3544	0.023		5.78205	3.54755	0.468432
71175	10.986	0.3554	0.0231		5.80212	3.55756	0.470468
71377	11.032	0.3564	0.0232		5.82641	3.56757	0.472505
71578	11.074	0.3573	0.0232		5.8486	3.57658	0.472505
71778	11.114	0.3585	0.0233		5.86972	3.58859	0.474542
71978	11.156	0.3593	0.0234		5.8919	3.5966	0.476578
72178	11.196	0.3603	0.0234		5.91303	3.60661	0.476578
72379	11.24	0.3614	0.0236		5.93627	3.61762	0.480652
72580	11.286	0.3624	0.0235		5.96056	3.62763	0.478615
72780	11.328	0.3633	0.0236		5.98274	3.63664	0.480652
72980	11.37	0.3644	0.0237		6.00493	3.64765	0.482688
73180	11.414	0.3653	0.0238		6.02816	3.65666	0.484725
73381	11.454	0.3663	0.0239		6.04929	3.66667	0.486762
73582	11.496	0.3674	0.024		6.07147	3.67768	0.488798
73782	11.534	0.3684	0.024		6.09154	3.68769	0.488798
73982	11.58	0.3694	0.0241		6.11583	3.6977	0.490835
74182	11.628	0.3705	0.0242		6.14118	3.70871	0.492872
74383	11.668	0.3715	0.0243		6.16231	3.71872	0.494908
74585	11.708	0.3725	0.0244		6.18344	3.72873	0.496945
74786	11.754	0.3735	0.0244		6.20773	3.73874	0.496945
74986	11.798	0.3745	0.0245		6.23097	3.74875	0.498982
75186	11.834	0.3755	0.0246		6.24998	3.75876	0.501018
75386	11.872	0.3764	0.0247		6.27005	3.76777	0.503055
75587	11.918	0.3774	0.0247		6.29434	3.77778	0.503055
75788	11.958	0.3784	0.0247		6.31547	3.78779	0.503055
75988	12.002	0.3794	0.0249		6.33871	3.7978	0.507128
76188	12.044	0.3802	0.025		6.36089	3.80581	0.509165
76388	12.084	0.3813	0.025		6.38202	3.81682	0.509165
76589	12.126	0.3823	0.0251		6.4042	3.82683	0.511202
76790	12.168	0.3834	0.0251		6.42638	3.83784	0.511202
76990	12.214	0.3843	0.0252		6.45067	3.84685	0.513238
77190	12.258	0.3854	0.0253		6.47391	3.85786	0.515275
77390	12.302	0.3864	0.0254		6.49715	3.86787	0.517312
77591	12.346	0.3874	0.0254		6.52039	3.87788	0.517312
77793	12.386	0.3884	0.0254		6.54151	3.88789	0.517312
77994	12.428	0.3894	0.0255		6.56369	3.8979	0.519348
78194	12.472	0.3904	0.0256		6.58693	3.90791	0.521385
78394	12.51	0.3913	0.0257		6.607	3.91692	0.523422
78594	12.556	0.3923	0.0257		6.6313	3.92693	0.523422
78795	12.598	0.3933	0.0259		6.65348	3.93694	0.527495
78996	12.64	0.3943	0.0259		6.67566	3.94695	0.527495
79196	12.684	0.3954	0.0259		6.6989	3.95796	0.527495
79396	12.726	0.3963	0.026		6.72108	3.96697	0.529532
79596	12.77	0.3973	0.0261		6.74432	3.97698	0.531568
79797	12.812	0.3983	0.0261		6.7665	3.98699	0.531568
79998	12.854	0.3994	0.0261		6.78868	3.998	0.531568
80198	12.896	0.4004	0.0262		6.81086	4.00801	0.533605
80398	12.94	0.4014	0.0263		6.8341	4.01802	0.535642
80598	12.978	0.4023	0.0264		6.85417	4.02703	0.537678
80799	13.018	0.4034	0.0265		6.8753	4.03804	0.539715
81000	13.06	0.4042	0.0265		6.89748	4.04605	0.539715
81200	13.102	0.4053	0.0265		6.91966	4.05706	0.539715
81400	13.146	0.4062	0.0266		6.9429	4.06607	0.541752
81600	13.19	0.4072	0.0267		6.96614	4.07608	0.543788
81801	13.238	0.4083	0.0268		6.99149	4.08709	0.545825
82003	13.288	0.4094	0.0268		7.01789	4.0981	0.545825
82204	13.334	0.4104	0.0269		7.04219	4.10811	0.547862
82404	13.376	0.4115	0.027		7.06437	4.11912	0.549898
82604	13.412	0.4124	0.027		7.08338	4.12813	0.549898
82804	13.458	0.4134	0.0271		7.10768	4.13814	0.551935
83005	13.5	0.4145	0.0272		7.12986	4.14915	0.553971
83206	13.538	0.4156	0.0273		7.14993	4.16016	0.556008
83406	13.58	0.4164	0.0274		7.17211	4.16817	0.558045
83606	13.62	0.4174	0.0275		7.19323	4.17818	0.560081
83806	13.66	0.4183	0.0276		7.21436	4.18719	0.562118
84007	13.702	0.4193	0.0276		7.23654	4.1972	0.562118
84208	13.75	0.4203	0.0277		7.26189	4.20721	0.564155
84408	13.794	0.4214	0.0278		7.28513	4.21822	0.566191
84608	13.838	0.4224	0.0279		7.30837	4.22823	0.568228
84808	13.88	0.4234	0.0279		7.33055	4.23824	0.568228
85009	13.926	0.4244	0.028		7.35485	4.24825	0.570265
85211	13.97	0.4255	0.0281		7.37808	4.25926	0.572301
85412	14.012	0.4265	0.0281		7.40026	4.26927	0.572301
85612	14.05	0.4275	0.0282		7.42033	4.27928	0.574338
85812	14.09	0.4284	0.0283		7.44146	4.28829	0.576375
86012	14.13	0.4295	0.0284		7.46259	4.2993	0.578411
86213	14.17	0.4303	0.0285		7.48371	4.30731	0.580448
86414	14.216	0.4313	0.0286		7.508	4.31732	0.582485
86614	14.254	0.4323	0.0286		7.52807	4.32733	0.582485
86814	14.296	0.4333	0.0287		7.55026	4.33734	0.584521
87014	14.336	0.4345	0.0288		7.57138	4.34935	0.586558
87215	14.374	0.4354	0.0289		7.59145	4.35836	0.588595
87416	14.416	0.4363	0.0289		7.61363	4.36737	0.588595
87616	14.46	0.4373	0.029		7.63687	4.37738	0.590631
87816	14.502	0.4384	0.0291		7.65905	4.38839	0.592668
88016	14.544	0.4393	0.0292		7.68123	4.3974	0.594705
88217	14.584	0.4403	0.0293		7.70236	4.40741	0.596741
88419	14.626	0.4413	0.0293		7.72454	4.41742	0.596741
88620	14.666	0.4423	0.0293		7.74567	4.42743	0.596741
88820	14.71	0.4434	0.0295		7.7689	4.43844	0.600815
89020	14.75	0.4442	0.0295		7.79003	4.44645	0.600815
89220	14.79	0.4453	0.0296		7.81116	4.45746	0.602851
89421	14.834	0.4463	0.0297		7.83439	4.46747	0.604888
89622	14.878	0.4473	0.0299		7.85763	4.47748	0.608961
89822	14.924	0.4482	0.0299		7.88193	4.48649	0.608961
90022	14.966	0.4493	0.0301		7.90411	4.4975	0.613035
90222	15.008	0.4502	0.0303		7.92629	4.50651	0.617108
90423	15.05	0.4512	0.0303		7.94847	4.51652	0.617108
90624	15.09	0.4522	0.0305		7.9696	4.52653	0.621181
90824	15.132	0.4532	0.0306		7.99178	4.53654	0.623218
91024	15.176	0.4543	0.0307		8.01502	4.54755	0.625255
91224	15.218	0.4552	0.0308		8.0372	4.55656	0.627291
91425	15.258	0.4563	0.0308		8.05832	4.56757	0.627291
91627	15.3	0.4572	0.0311		8.08051	4.57658	0.633401
91828	15.344	0.4583	0.031		8.10374	4.58759	0.631365
92028	15.382	0.4592	0.0311		8.12381	4.5966	0.633401
92228	15.422	0.4602	0.0313		8.14494	4.60661	0.637475
92428	15.462	0.4612	0.0313		8.16606	4.61662	0.637475
92629	15.504	0.4622	0.0314		8.18825	4.62663	0.639511
92830	15.544	0.4632	0.0316		8.20937	4.63664	0.643585
93030	15.586	0.4642	0.0316		8.23155	4.64665	0.643585
93230	15.63	0.4652	0.0317		8.25479	4.65666	0.645621
93430	15.672	0.4663	0.0318		8.27697	4.66767	0.647658
93631	15.72	0.4671	0.0318		8.30232	4.67568	0.647658
93832	15.768	0.4682	0.032		8.32767	4.68669	0.651731
94032	15.81	0.4692	0.032		8.34986	4.6967	0.651731
94232	15.85	0.4703	0.0321		8.37098	4.70771	0.653768
94432	15.894	0.4713	0.0322		8.39422	4.71772	0.655804
94633	15.934	0.4722	0.0323		8.41535	4.72673	0.657841
94835	15.974	0.4733	0.0324		8.43647	4.73774	0.659878
95036	16.016	0.4744	0.0324		8.45865	4.74875	0.659878
95236	16.062	0.4753	0.0325		8.48295	4.75776	0.661914
95436	16.104	0.4764	0.0326		8.50513	4.76877	0.663951
95636	16.146	0.4772	0.0327		8.52731	4.77678	0.665988
95837	16.192	0.4783	0.0328		8.5516	4.78779	0.668024
96038	16.232	0.4795	0.0329		8.57273	4.7998	0.670061
96238	16.278	0.4803	0.033		8.59702	4.80781	0.672098
96438	16.324	0.4814	0.0331		8.62132	4.81882	0.674134
96638	16.368	0.4825	0.0331		8.64456	4.82983	0.674134
96839	16.408	0.4834	0.0332		8.66568	4.83884	0.676171
97040	16.448	0.4844	0.0334		8.68681	4.84885	0.680244
97240	16.484	0.4853	0.0334		8.70582	4.85786	0.680244
97440	16.524	0.4864	0.0335		8.72695	4.86887	0.682281
97640	16.564	0.4875	0.0336		8.74807	4.87988	0.684318
97841	16.606	0.4884	0.0338		8.77025	4.88889	0.688391
98043	16.644	0.4894	0.0339		8.79032	4.8989	0.690428
98244	16.684	0.4904	0.0339		8.81145	4.90891	0.690428
98444	16.73	0.4913	0.034		8.83574	4.91792	0.692464
98644	16.766	0.4923	0.0341		8.85476	4.92793	0.694501
98844	16.808	0.4934	0.0342		8.87694	4.93894	0.696538
99045	16.848	0.4944	0.0342		8.89806	4.94895	0.696538
99246	16.89	0.4951	0.0343		8.92025	4.95596	0.698574
99446	16.936	0.4963	0.0344		8.94454	4.96797	0.700611
99646	16.982	0.4972	0.0345		8.96883	4.97698	0.702648
99846	17.026	0.4984	0.0346		8.99207	4.98899	0.704684
100047	17.07	0.4994	0.0347		9.01531	4.999	0.706721
100248	17.114	0.5004	0.0348		9.03855	5.00901	0.708758
100448	17.15	0.5015	0.0348		9.05756	5.02002	0.708758
100648	17.188	0.5026	0.0349		9.07763	5.03103	0.710794
100848	17.228	0.5035	0.035		9.09876	5.04004	0.712831
101049	17.266	0.5045	0.0351		9.11882	5.05005	0.714868
101250	17.304	0.5054	0.0352		9.13889	5.05906	0.716904
101450	17.342	0.5064	0.0353		9.15896	5.06907	0.718941
101650	17.382	0.5074	0.0353		9.18009	5.07908	0.718941
101850	17.426	0.5084	0.0354		9.20333	5.08909	0.720978
102051	17.468	0.5095	0.0356		9.22551	5.1001	0.725051
102253	17.508	0.5103	0.0356		9.24663	5.10811	0.725051
102454	17.546	0.5113	0.0357		9.2667	5.11812	0.727088
102654	17.592	0.5124	0.0358		9.291	5.12913	0.729124
102854	17.634	0.5134	0.0359		9.31318	5.13914	0.731161
103054	17.672	0.5144	0.036		9.33325	5.14915	0.733198
103255	17.718	0.5154	0.0361		9.35754	5.15916	0.735234
103456	17.76	0.5165	0.0362		9.37972	5.17017	0.737271
103656	17.8	0.5175	0.0363		9.40085	5.18018	0.739308
103856	17.84	0.5185	0.0363		9.42198	5.19019	0.739308
104056	17.884	0.5195	0.0365		9.44521	5.2002	0.743381
104257	17.926	0.5204	0.0366		9.4674	5.20921	0.745418
104458	17.966	0.5215	0.0366		9.48852	5.22022	0.745418
104658	18.008	0.5225	0.0368		9.5107	5.23023	0.749491
104858	18.044	0.5234	0.0368		9.52972	5.23924	0.749491
105058	18.088	0.5244	0.0369		9.55295	5.24925	0.751527
105259	18.122	0.5254	0.037		9.57091	5.25926	0.753564
105461	18.162	0.5263	0.0371		9.59204	5.26827	0.755601
105662	18.208	0.5273	0.0372		9.61633	5.27828	0.757637
105862	18.252	0.5283	0.0373		9.63957	5.28829	0.759674
106062	18.292	0.5294	0.0374		9.66069	5.2993	0.761711
106262	18.334	0.5304	0.0376		9.68288	5.30931	0.765784
106463	18.372	0.5313	0.0376		9.70295	5.31832	0.765784
106664	18.41	0.5323	0.0377		9.72301	5.32833	0.767821
106864	18.452	0.5332	0.0378		9.7452	5.33734	0.769857
107064	18.492	0.5342	0.0378		9.76632	5.34735	0.769857
107264	18.53	0.5353	0.038		9.78639	5.35836	0.773931
107465	18.572	0.5363	0.038		9.80857	5.36837	0.773931
107666	18.614	0.5374	0.0382		9.83075	5.37938	0.778004
107866	18.65	0.5384	0.0382		9.84977	5.38939	0.778004
108066	18.692	0.5393	0.0383		9.87195	5.3984	0.780041
108266	18.736	0.5404	0.0384		9.89519	5.40941	0.782077
108467	18.774	0.5413	0.0385		9.91526	5.41842	0.784114
108669	18.822	0.5423	0.0386		9.94061	5.42843	0.786151
108870	18.864	0.5433	0.0387		9.96279	5.43844	0.788187
109070	18.896	0.5444	0.0388		9.97969	5.44945	0.790224
109270	18.94	0.5453	0.0388		10.0029	5.45846	0.790224
109470	18.982	0.5463	0.039		10.0251	5.46847	0.794297
109671	19.024	0.5473	0.0391		10.0473	5.47848	0.796334
109872	19.068	0.5485	0.0392		10.0705	5.49049	0.798371
110072	19.108	0.5494	0.0393		10.0917	5.4995	0.800407
110272	19.15	0.5504	0.0394		10.1138	5.50951	0.802444
110472	19.188	0.5514	0.0394		10.1339	5.51952	0.802444
110673	19.23	0.5524	0.0397		10.1561	5.52953	0.808554
110874	19.27	0.5535	0.0396		10.1772	5.54054	0.806517
111074	19.306	0.5544	0.0397		10.1962	5.54955	0.808554
111274	19.346	0.5555	0.0399		10.2174	5.56056	0.812627
111474	19.388	0.5563	0.0399		10.2395	5.56857	0.812627
111675	19.428	0.5573	0.04		10.2607	5.57858	0.814664
111877	19.474	0.5584	0.0402		10.285	5.58959	0.818737
112078	19.516	0.5594	0.0403		10.3071	5.5996	0.820774
112278	19.558	0.5604	0.0403		10.3293	5.60961	0.820774
112478	19.598	0.5615	0.0404		10.3504	5.62062	0.822811
112678	19.638	0.5624	0.0405		10.3716	5.62963	0.824847
112879	19.678	0.5634	0.0407		10.3927	5.63964	0.828921
113080	19.72	0.5645	0.0407		10.4149	5.65065	0.828921
113280	19.754	0.5654	0.0408		10.4328	5.65966	0.830957
113480	19.79	0.5664	0.0409		10.4518	5.66967	0.832994
113680	19.83	0.5674	0.041		10.473	5.67968	0.835031
113881	19.868	0.5685	0.0411		10.493	5.69069	0.837067
114082	19.902	0.5694	0.0413		10.511	5.6997	0.841141
114282	19.94	0.5704	0.0413		10.5311	5.70971	0.841141
114482	19.98	0.5713	0.0414		10.5522	5.71872	0.843177
114682	20.016	0.5723	0.0415		10.5712	5.72873	0.845214
114883	20.062	0.5732	0.0417		10.5955	5.73774	0.849287
115085	20.104	0.5743	0.0417		10.6177	5.74875	0.849287
115286	20.14	0.5753	0.0418		10.6367	5.75876	0.851324
115486	20.182	0.5764	0.0419		10.6589	5.76977	0.85336
115686	20.22	0.5773	0.042		10.6789	5.77878	0.855397
115886	20.264	0.5783	0.0421		10.7022	5.78879	0.857434
116087	20.312	0.5794	0.0422		10.7275	5.7998	0.85947
116288	20.348	0.5803	0.0423		10.7465	5.80881	0.861507
116488	20.388	0.5814	0.0424		10.7677	5.81982	0.863544
116688	20.426	0.5823	0.0426		10.7877	5.82883	0.867617
116888	20.466	0.5834	0.0426		10.8089	5.83984	0.867617
117089	20.5	0.5842	0.0427		10.8268	5.84785	0.869654
117290	20.542	0.5854	0.0429		10.849	5.85986	0.873727
117490	20.584	0.5863	0.043		10.8712	5.86887	0.875764
117690	20.626	0.5872	0.043		10.8934	5.87788	0.875764
117890	20.672	0.5882	0.0432		10.9177	5.88789	0.879837
118091	20.73	0.5895	0.0432		10.9483	5.9009	0.879837
118293	20.78	0.5905	0.0434		10.9747	5.91091	0.88391
118494	20.822	0.5915	0.0434		10.9969	5.92092	0.88391
118694	20.868	0.5927	0.0436		11.0212	5.93293	0.887984
118894	20.908	0.5939	0.0436		11.0423	5.94494	0.887984
119094	20.942	0.5948	0.0438		11.0603	5.95395	0.892057
119295	20.976	0.5958	0.0439		11.0782	5.96396	0.894094
119496	21.008	0.5967	0.044		11.0951	5.97297	0.89613
119696	21.042	0.5975	0.0441		11.1131	5.98098	0.898167
119896	21.076	0.5985	0.0442		11.131	5.99099	0.900204
120096	21.114	0.5994	0.0443		11.1511	6	0.90224
120297	21.154	0.6005	0.0443		11.1722	6.01101	0.90224
120498	21.192	0.6016	0.0445		11.1923	6.02202	0.906314
120698	21.232	0.6025	0.0446		11.2134	6.03103	0.90835
120898	21.272	0.6034	0.0448		11.2345	6.04004	0.912424
121098	21.322	0.6045	0.0448		11.261	6.05105	0.912424
121299	21.364	0.6056	0.0449		11.2831	6.06206	0.91446
121500	21.406	0.6065	0.0451		11.3053	6.07107	0.918534
121700	21.444	0.6075	0.0451		11.3254	6.08108	0.918534
121900	21.48	0.6086	0.0452		11.3444	6.09209	0.92057
122100	21.516	0.6095	0.0454		11.3634	6.1011	0.924644
122301	21.554	0.6106	0.0455		11.3835	6.11211	0.92668
122503	21.596	0.6116	0.0455		11.4057	6.12212	0.92668
122704	21.638	0.6125	0.0457		11.4278	6.13113	0.930754
122904	21.672	0.6136	0.0458		11.4458	6.14214	0.93279
123104	21.71	0.6145	0.0459		11.4659	6.15115	0.934827
123304	21.75	0.6155	0.046		11.487	6.16116	0.936864
123505	21.786	0.6165	0.0462		11.506	6.17117	0.940937
123706	21.824	0.6174	0.0463		11.5261	6.18018	0.942974
123906	21.862	0.6185	0.0464		11.5461	6.19119	0.94501
124106	21.902	0.6194	0.0465		11.5673	6.2002	0.947047
124306	21.944	0.6205	0.0466		11.5895	6.21121	0.949084
124507	21.984	0.6216	0.0467		11.6106	6.22222	0.95112
124708	22.022	0.6224	0.0468		11.6306	6.23023	0.953157
124908	22.058	0.6234	0.047		11.6497	6.24024	0.95723
125108	22.098	0.6245	0.0469		11.6708	6.25125	0.955193
125308	22.138	0.6255	0.0472		11.6919	6.26126	0.961303
125509	22.17	0.6264	0.0473		11.7088	6.27027	0.96334
125711	22.218	0.6275	0.0474		11.7342	6.28128	0.965377
125912	22.256	0.6285	0.0474		11.7542	6.29129	0.965377
126112	22.292	0.6295	0.0475		11.7732	6.3013	0.967413
126312	22.332	0.6304	0.0477		11.7944	6.31031	0.971487
126512	22.37	0.6314	0.0477		11.8144	6.32032	0.971487
126713	22.408	0.6323	0.0479		11.8345	6.32933	0.97556
126914	22.448	0.6334	0.0481		11.8556	6.34034	0.979633
127114	22.482	0.6343	0.048		11.8736	6.34935	0.977597
127314	22.524	0.6354	0.0482		11.8958	6.36036	0.98167
127514	22.562	0.6364	0.0483		11.9158	6.37037	0.983707
127715	22.6	0.6373	0.0484		11.9359	6.37938	0.985743
127916	22.638	0.6384	0.0485		11.956	6.39039	0.98778
128116	22.68	0.6393	0.0486		11.9782	6.3994	0.989817
128316	22.718	0.6404	0.0487		11.9982	6.41041	0.991853
128516	22.758	0.6414	0.0489		12.0194	6.42042	0.995927
128717	22.796	0.6424	0.0489		12.0394	6.43043	0.995927
128919	22.832	0.6433	0.0491		12.0584	6.43944	1
129120	22.874	0.6443	0.0492		12.0806	6.44945	1.00204
129320	22.91	0.6454	0.0494		12.0996	6.46046	1.00611
129520	22.946	0.6464	0.0494		12.1186	6.47047	1.00611
129720	22.986	0.6472	0.0495		12.1398	6.47848	1.00815
129921	23.022	0.6483	0.0496		12.1588	6.48949	1.01018
130122	23.064	0.6493	0.0498		12.181	6.4995	1.01426
130322	23.104	0.6503	0.0498		12.2021	6.50951	1.01426
130522	23.15	0.6512	0.05		12.2264	6.51852	1.01833
130722	23.198	0.6524	0.0501		12.2517	6.53053	1.02037
130923	23.244	0.6535	0.0503		12.276	6.54154	1.02444
131124	23.292	0.6545	0.0503		12.3014	6.55155	1.02444
131324	23.334	0.6556	0.0505		12.3236	6.56256	1.02851
131524	23.374	0.6566	0.0506		12.3447	6.57257	1.03055
131724	23.414	0.6577	0.0506		12.3658	6.58358	1.03055
131925	23.452	0.6585	0.0509		12.3859	6.59159	1.03666
132127	23.488	0.6596	0.051		12.4049	6.6026	1.0387
132328	23.524	0.6605	0.0511		12.4239	6.61161	1.04073
132528	23.562	0.6615	0.0512		12.444	6.62162	1.04277
132728	23.596	0.6626	0.0513		12.4619	6.63263	1.04481
132928	23.636	0.6635	0.0514		12.4831	6.64164	1.04684
133129	23.678	0.6645	0.0515		12.5052	6.65165	1.04888
133330	23.714	0.6656	0.0517		12.5243	6.66266	1.05295
133530	23.75	0.6665	0.0518		12.5433	6.67167	1.05499
133730	23.792	0.6674	0.0519		12.5655	6.68068	1.05703
133930	23.834	0.6686	0.0521		12.5876	6.69269	1.0611
134131	23.874	0.6695	0.0522		12.6088	6.7017	1.06314
134332	23.91	0.6706	0.0523		12.6278	6.71271	1.06517
134532	23.95	0.6715	0.0523		12.6489	6.72172	1.06517
134732	23.984	0.6726	0.0525		12.6669	6.73273	1.06925
134932	24.02	0.6734	0.0526		12.6859	6.74074	1.07128
135133	24.058	0.6746	0.0528		12.7059	6.75275	1.07536
135335	24.094	0.6754	0.0529		12.7249	6.76076	1.07739
135536	24.13	0.6764	0.053		12.744	6.77077	1.07943
135736	24.174	0.6774	0.0531		12.7672	6.78078	1.08147
135936	24.206	0.6785	0.0532		12.7841	6.79179	1.0835
136136	24.248	0.6794	0.0533		12.8063	6.8008	1.08554
136337	24.284	0.6806	0.0535		12.8253	6.81281	1.08961
136538	24.322	0.6814	0.0536		12.8454	6.82082	1.09165
136738	24.36	0.6825	0.0538		12.8654	6.83183	1.09572
136938	24.398	0.6835	0.0539		12.8855	6.84184	1.09776
137138	24.438	0.6843	0.054		12.9066	6.84985	1.0998
137339	24.476	0.6855	0.0541		12.9267	6.86186	1.10183
137540	24.516	0.6864	0.0542		12.9478	6.87087	1.10387
137740	24.556	0.6874	0.0545		12.9689	6.88088	1.10998
137940	24.596	0.6885	0.0545		12.9901	6.89189	1.10998
138140	24.634	0.6894	0.0547		13.0101	6.9009	1.11405
138341	24.676	0.6905	0.0548		13.0323	6.91191	1.11609
138543	24.72	0.6916	0.0549		13.0556	6.92292	1.11813
138744	24.762	0.6926	0.055		13.0777	6.93293	1.12016
138944	24.796	0.6936	0.0552		13.0957	6.94294	1.12424
139144	24.832	0.6945	0.0552		13.1147	6.95195	1.12424
139344	24.868	0.6957	0.0554		13.1337	6.96396	1.12831
139545	24.91	0.6967	0.0556		13.1559	6.97397	1.13238
139746	24.954	0.6976	0.0557		13.1791	6.98298	1.13442
139946	24.994	0.6987	0.0559		13.2003	6.99399	1.13849
140146	25.034	0.6996	0.056		13.2214	7.003	1.14053
140346	25.076	0.7007	0.0561		13.2436	7.01401	1.14257
140547	25.114	0.7018	0.0563		13.2636	7.02503	1.14664
140748	25.142	0.7028	0.0564		13.2784	7.03504	1.14868
140948	25.174	0.7037	0.0566		13.2953	7.04404	1.15275
141148	25.206	0.7046	0.0567		13.3122	7.05305	1.15479
141348	25.244	0.7056	0.0568		13.3323	7.06306	1.15682
141549	25.282	0.7067	0.0569		13.3524	7.07407	1.15886
141750	25.32	0.7076	0.057		13.3724	7.08308	1.1609
141950	25.356	0.7086	0.0572		13.3915	7.09309	1.16497
142150	25.392	0.7096	0.0574		13.4105	7.1031	1.16904
142350	25.43	0.7105	0.0574		13.4305	7.11211	1.16904
142551	25.468	0.7116	0.0576		13.4506	7.12312	1.17312
142753	25.504	0.7125	0.0577		13.4696	7.13213	1.17515
142954	25.544	0.7137	0.0578		13.4907	7.14414	1.17719
143154	25.58	0.7145	0.058		13.5098	7.15215	1.18126
143354	25.616	0.7155	0.0581		13.5288	7.16216	1.1833
143554	25.662	0.7164	0.0583		13.5531	7.17117	1.18737
143755	25.702	0.7176	0.0584		13.5742	7.18318	1.18941
143956	25.742	0.7185	0.0586		13.5953	7.19219	1.19348
144156	25.782	0.7196	0.0586		13.6164	7.2032	1.19348
144356	25.818	0.7206	0.0588		13.6355	7.21321	1.19756
144556	25.858	0.7216	0.0589		13.6566	7.22322	1.19959
144757	25.896	0.7225	0.0591		13.6767	7.23223	1.20367
144958	25.93	0.7236	0.0591		13.6946	7.24324	1.20367
145158	25.966	0.7246	0.0594		13.7136	7.25325	1.20978
145358	26.004	0.7255	0.0595		13.7337	7.26226	1.21181
145558	26.044	0.7265	0.0596		13.7548	7.27227	1.21385
145759	26.082	0.7276	0.0598		13.7749	7.28328	1.21792
145961	26.118	0.7286	0.06		13.7939	7.29329	1.222
146162	26.156	0.7296	0.06		13.814	7.3033	1.222
146362	26.192	0.7305	0.0602		13.833	7.31231	1.22607
146562	26.228	0.7315	0.0603		13.852	7.32232	1.22811
146762	26.266	0.7325	0.0605		13.8721	7.33233	1.23218
146963	26.308	0.7335	0.0606		13.8942	7.34234	1.23422
147164	26.35	0.7345	0.0608		13.9164	7.35235	1.23829
147364	26.386	0.7355	0.0608		13.9354	7.36236	1.23829
147564	26.426	0.7366	0.061		13.9566	7.37337	1.24236
147764	26.464	0.7375	0.0611		13.9766	7.38238	1.2444
147965	26.504	0.7385	0.0613		13.9978	7.39239	1.24847
148166	26.542	0.7395	0.0614		14.0178	7.4024	1.25051
148366	26.584	0.7406	0.0615		14.04	7.41341	1.25255
148566	26.624	0.7416	0.0617		14.0611	7.42342	1.25662
148766	26.66	0.7426	0.0617		14.0801	7.43343	1.25662
148967	26.7	0.7436	0.0619		14.1013	7.44344	1.26069
149169	26.736	0.7446	0.062		14.1203	7.45345	1.26273
149370	26.774	0.7456	0.0622		14.1404	7.46346	1.2668
149570	26.804	0.7466	0.0623		14.1562	7.47347	1.26884
149770	26.842	0.7475	0.0625		14.1763	7.48248	1.27291
149970	26.878	0.7484	0.0626		14.1953	7.49149	1.27495
150171	26.918	0.7496	0.0627		14.2164	7.5035	1.27699
150372	26.956	0.7504	0.0629		14.2365	7.51151	1.28106
150572	26.994	0.7515	0.0631		14.2565	7.52252	1.28513
150772	27.032	0.7526	0.0632		14.2766	7.53353	1.28717
150972	27.082	0.7536	0.0633		14.303	7.54354	1.28921
151173	27.116	0.7546	0.0634		14.321	7.55355	1.29124
151374	27.154	0.7555	0.0637		14.341	7.56256	1.29735
151574	27.188	0.7566	0.0637		14.359	7.57357	1.29735
151774	27.228	0.7578	0.0638		14.3801	7.58559	1.29939
151974	27.26	0.7586	0.0641		14.397	7.59359	1.3055
152175	27.294	0.7596	0.0642		14.415	7.6036	1.30754
152377	27.332	0.7606	0.0643		14.4351	7.61361	1.30957
152578	27.366	0.7616	0.0645		14.453	7.62362	1.31365
152778	27.404	0.7626	0.0646		14.4731	7.63363	1.31568
152978	27.442	0.7636	0.0647		14.4932	7.64364	1.31772
153178	27.478	0.7646	0.0649		14.5122	7.65365	1.32179
153379	27.516	0.7655	0.065		14.5322	7.66266	1.32383
153580	27.558	0.7666	0.0652		14.5544	7.67367	1.3279
153780	27.598	0.7677	0.0653		14.5755	7.68468	1.32994
153980	27.634	0.7686	0.0655		14.5946	7.69369	1.33401
154180	27.674	0.7697	0.0656		14.6157	7.7047	1.33605
154381	27.71	0.7707	0.0658		14.6347	7.71471	1.34012
154582	27.744	0.7716	0.0659		14.6527	7.72372	1.34216
154782	27.776	0.7727	0.066		14.6696	7.73473	1.3442
154982	27.814	0.7736	0.0662		14.6896	7.74374	1.34827
155182	27.846	0.7746	0.0663		14.7065	7.75375	1.35031
155383	27.884	0.7756	0.0665		14.7266	7.76376	1.35438
155585	27.92	0.7765	0.0665		14.7456	7.77277	1.35438
155786	27.958	0.7776	0.0668		14.7657	7.78378	1.36049
155986	27.994	0.7787	0.0668		14.7847	7.79479	1.36049
156186	28.028	0.7796	0.067		14.8026	7.8038	1.36456
156386	28.066	0.7805	0.0672		14.8227	7.81281	1.36864
156587	28.104	0.7816	0.0674		14.8428	7.82382	1.37271
156788	28.142	0.7825	0.0675		14.8628	7.83283	1.37475
156988	28.182	0.7836	0.0676		14.884	7.84384	1.37678
157188	28.218	0.7846	0.0678		14.903	7.85385	1.38086
157388	28.256	0.7856	0.0679		14.9231	7.86386	1.38289
157589	28.292	0.7865	0.068		14.9421	7.87287	1.38493
157790	28.328	0.7876	0.0682		14.9611	7.88388	1.389
157990	28.366	0.7887	0.0684		14.9812	7.89489	1.39308
158190	28.4	0.7895	0.0684		14.9991	7.9029	1.39308
158390	28.436	0.7905	0.0687		15.0181	7.91291	1.39919
158591	28.468	0.7914	0.0689		15.035	7.92192	1.40326
158793	28.506	0.7925	0.069		15.0551	7.93293	1.4053
158994	28.54	0.7935	0.0691		15.073	7.94294	1.40733
159194	28.578	0.7945	0.0693		15.0931	7.95295	1.41141
159394	28.614	0.7955	0.0694		15.1121	7.96296	1.41344
159594	28.648	0.7965	0.0696		15.1301	7.97297	1.41752
159795	28.686	0.7975	0.0697		15.1502	7.98298	1.41955
159996	28.738	0.7985	0.0698		15.1776	7.99299	1.42159
160196	28.782	0.7996	0.07		15.2009	8.004	1.42566
160396	28.826	0.8006	0.0701		15.2241	8.01401	1.4277
160596	28.866	0.8016	0.0703		15.2452	8.02402	1.43177
160797	28.906	0.8027	0.0704		15.2663	8.03504	1.43381
160998	28.946	0.8038	0.0706		15.2875	8.04605	1.43788
161198	28.98	0.8048	0.0708		15.3054	8.05606	1.44196
161398	29.016	0.8059	0.0709		15.3244	8.06707	1.44399
161598	29.052	0.8068	0.071		15.3435	8.07608	1.44603
161799	29.084	0.8079	0.0712		15.3604	8.08709	1.4501
162000	29.12	0.8088	0.0714		15.3794	8.0961	1.45418
162200	29.152	0.8098	0.0715		15.3963	8.10611	1.45621
162400	29.186	0.8106	0.0716		15.4142	8.11411	1.45825
162600	29.22	0.8116	0.0718		15.4322	8.12412	1.46232
162801	29.254	0.8127	0.0721		15.4501	8.13514	1.46843
163003	29.288	0.8137	0.0722		15.4681	8.14515	1.47047
163204	29.328	0.8148	0.0723		15.4892	8.15616	1.47251
163404	29.364	0.8157	0.0724		15.5082	8.16517	1.47454
163604	29.396	0.8167	0.0726		15.5251	8.17518	1.47862
163804	29.432	0.8176	0.0727		15.5441	8.18418	1.48065
164005	29.47	0.8186	0.073		15.5642	8.19419	1.48676
164206	29.508	0.8197	0.0731		15.5843	8.20521	1.4888
164406	29.544	0.8207	0.0732		15.6033	8.21522	1.49084
164606	29.578	0.8217	0.0734		15.6213	8.22523	1.49491
164806	29.612	0.8227	0.0735		15.6392	8.23524	1.49695
165007	29.644	0.8236	0.0736		15.6561	8.24424	1.49898
165208	29.68	0.8247	0.0738		15.6751	8.25526	1.50305
165408	29.714	0.8257	0.0739		15.6931	8.26527	1.50509
165608	29.75	0.8266	0.0741		15.7121	8.27427	1.50916
165808	29.786	0.8277	0.0743		15.7311	8.28529	1.51324
166009	29.822	0.8286	0.0744		15.7501	8.29429	1.51527
166211	29.854	0.8298	0.0746		15.767	8.30631	1.51935
166412	29.888	0.8307	0.0747		15.785	8.31532	1.52138
166612	29.922	0.8318	0.0749		15.8029	8.32633	1.52546
166812	29.956	0.8325	0.0751		15.8209	8.33333	1.52953
167012	29.998	0.8337	0.0752		15.8431	8.34535	1.53157
167213	30.042	0.8346	0.0754		15.8663	8.35435	1.53564
167414	30.094	0.8358	0.0756		15.8938	8.36637	1.53971
167614	30.134	0.8371	0.0757		15.9149	8.37938	1.54175
167814	30.168	0.8379	0.0759		15.9329	8.38739	1.54582
168014	30.202	0.839	0.076		15.9508	8.3984	1.54786
168215	30.238	0.8399	0.0762		15.9698	8.40741	1.55193
168416	30.272	0.8409	0.0764		15.9878	8.41742	1.55601
168616	30.3	0.8419	0.0766		16.0026	8.42743	1.56008
168816	30.336	0.8429	0.0767		16.0216	8.43744	1.56212
169016	30.364	0.8439	0.0768		16.0364	8.44745	1.56415
169217	30.396	0.8448	0.077		16.0533	8.45646	1.56823
169419	30.428	0.8458	0.0771		16.0702	8.46647	1.57026
169620	30.464	0.8469	0.0773		16.0892	8.47748	1.57434
169820	30.5	0.8479	0.0774		16.1082	8.48749	1.57637
170020	30.532	0.8488	0.0775		16.1251	8.4965	1.57841
170220	30.568	0.8498	0.0776		16.1441	8.50651	1.58045
170421	30.6	0.8507	0.0779		16.161	8.51552	1.58656
170622	30.64	0.8517	0.0779		16.1821	8.52553	1.58656
170822	30.676	0.8528	0.0781		16.2012	8.53654	1.59063
171022	30.714	0.8538	0.0782		16.2212	8.54655	1.59267
171222	30.748	0.8548	0.0784		16.2392	8.55656	1.59674
171423	30.784	0.8559	0.0785		16.2582	8.56757	1.59878
171624	30.82	0.8568	0.0786		16.2772	8.57658	1.60081
171824	30.852	0.8578	0.0789		16.2941	8.58659	1.60692
172024	30.878	0.8588	0.079		16.3078	8.5966	1.60896
172224	30.914	0.8598	0.0791		16.3268	8.60661	1.611
172425	30.948	0.8608	0.0794		16.3448	8.61662	1.61711
172627	30.978	0.8617	0.0794		16.3606	8.62563	1.61711
172828	31.018	0.8627	0.0796		16.3818	8.63564	1.62118
173028	31.052	0.8638	0.0798		16.3997	8.64665	1.62525
173228	31.09	0.8647	0.08		16.4198	8.65566	1.62933
173428	31.12	0.8657	0.0802		16.4356	8.66567	1.6334
173629	31.158	0.8667	0.0802		16.4557	8.67568	1.6334
173830	31.192	0.8677	0.0804		16.4737	8.68569	1.63747
174030	31.228	0.8687	0.0806		16.4927	8.6957	1.64155
174230	31.264	0.8697	0.0807		16.5117	8.70571	1.64358
174430	31.3	0.8707	0.0809		16.5307	8.71572	1.64766
174631	31.334	0.8718	0.081		16.5487	8.72673	1.64969
174832	31.372	0.8727	0.0812		16.5687	8.73574	1.65377
175032	31.41	0.8738	0.0813		16.5888	8.74675	1.6558
175232	31.446	0.8748	0.0816		16.6078	8.75676	1.66191
175432	31.478	0.8759	0.0816		16.6247	8.76777	1.66191
175633	31.512	0.8769	0.0818		16.6427	8.77778	1.66599
175835	31.542	0.8778	0.082		16.6585	8.78679	1.67006
176036	31.574	0.8788	0.0822		16.6754	8.7968	1.67413
176236	31.61	0.8797	0.0824		16.6944	8.80581	1.67821
176436	31.644	0.8807	0.0825		16.7124	8.81582	1.68024
176636	31.68	0.8817	0.0826		16.7314	8.82583	1.68228
176837	31.724	0.8829	0.0827		16.7546	8.83784	1.68432
177038	31.758	0.8838	0.0829		16.7726	8.84685	1.68839
177238	31.792	0.8849	0.0831		16.7906	8.85786	1.69246
177438	31.822	0.8858	0.0833		16.8064	8.86687	1.69654
177638	31.858	0.8869	0.0834		16.8254	8.87788	1.69857
177839	31.892	0.8878	0.0836		16.8434	8.88689	1.70265
178040	31.924	0.8887	0.0838		16.8603	8.8959	1.70672
178240	31.96	0.8898	0.0839		16.8793	8.90691	1.70876
178440	31.996	0.8907	0.0841		16.8983	8.91592	1.71283
178640	32.03	0.8919	0.0843		16.9162	8.92793	1.7169
178841	32.06	0.8927	0.0844		16.9321	8.93594	1.71894
179043	32.094	0.8938	0.0846		16.95	8.94695	1.72301
179244	32.126	0.8948	0.0848		16.967	8.95696	1.72709
179444	32.154	0.8958	0.0849		16.9817	8.96697	1.72912
179644	32.186	0.8967	0.0851		16.9986	8.97598	1.7332
179844	32.222	0.8978	0.0853		17.0177	8.98699	1.73727
180045	32.254	0.8987	0.0855		17.0346	8.996	1.74134
180246	32.286	0.8998	0.0856		17.0515	9.00701	1.74338
180446	32.318	0.9007	0.0858		17.0684	9.01602	1.74745
180646	32.35	0.9016	0.086		17.0853	9.02503	1.75153
180846	32.386	0.9027	0.0861		17.1043	9.03604	1.75356
181047	32.42	0.9038	0.0862		17.1222	9.04705	1.7556
181248	32.45	0.9047	0.0865		17.1381	9.05606	1.76171
181448	32.48	0.9057	0.0866		17.1539	9.06607	1.76375
181648	32.516	0.9067	0.0868		17.1729	9.07608	1.76782
181848	32.55	0.9077	0.087		17.1909	9.08609	1.77189
182049	32.59	0.9087	0.0871		17.212	9.0961	1.77393
182250	32.622	0.9097	0.0873		17.2289	9.10611	1.778
182450	32.652	0.9108	0.0875		17.2448	9.11712	1.78208
182650	32.686	0.9117	0.0876		17.2627	9.12613	1.78411
182850	32.724	0.9128	0.0877		17.2828	9.13714	1.78615
183051	32.762	0.9138	0.0879		17.3028	9.14715	1.79022
183253	32.8	0.9149	0.0882		17.3229	9.15816	1.79633
183454	32.832	0.9158	0.0883		17.3398	9.16717	1.79837
183654	32.866	0.9168	0.0884		17.3578	9.17718	1.80041
183854	32.9	0.9179	0.0886		17.3757	9.18819	1.80448
184054	32.932	0.9188	0.0888		17.3926	9.1972	1.80855
184255	32.96	0.9198	0.089		17.4074	9.20721	1.81263
184456	32.992	0.9208	0.0892		17.4243	9.21722	1.8167
184656	33.02	0.9218	0.0893		17.4391	9.22723	1.81874
184856	33.054	0.9229	0.0894		17.4571	9.23824	1.82077
185056	33.082	0.9237	0.0896		17.4718	9.24625	1.82485
185257	33.112	0.9247	0.0898		17.4877	9.25626	1.82892
185458	33.148	0.9256	0.09		17.5067	9.26527	1.83299
185658	33.186	0.9266	0.0902		17.5268	9.27528	1.83707
185858	33.222	0.9277	0.0903		17.5458	9.28629	1.8391
186058	33.258	0.9288	0.0905		17.5648	9.2973	1.84318
186259	33.292	0.9298	0.0907		17.5828	9.30731	1.84725
186461	33.322	0.9309	0.0909		17.5986	9.31832	1.85132
186662	33.354	0.9319	0.091		17.6155	9.32833	1.85336
186862	33.384	0.9326	0.0912		17.6313	9.33534	1.85743
187062	33.416	0.9338	0.0914		17.6482	9.34735	1.86151
187262	33.448	0.9349	0.0917		17.6651	9.35836	1.86762
187463	33.478	0.9358	0.0918		17.681	9.36737	1.86965
187664	33.506	0.9367	0.0919		17.6958	9.37638	1.87169
187864	33.538	0.9378	0.0921		17.7127	9.38739	1.87576
188064	33.57	0.9386	0.0923		17.7296	9.3954	1.87984
188264	33.6	0.9397	0.0925		17.7454	9.40641	1.88391
188465	33.634	0.9407	0.0927		17.7634	9.41642	1.88798
188666	33.668	0.9417	0.0929		17.7813	9.42643	1.89206
188866	33.7	0.9427	0.0931		17.7982	9.43644	1.89613
189066	33.736	0.9438	0.0932		17.8173	9.44745	1.89817
189266	33.77	0.9446	0.0933		17.8352	9.45546	1.9002
189467	33.802	0.9457	0.0936		17.8521	9.46647	1.90631
189669	33.834	0.9467	0.0938		17.869	9.47648	1.91039
189870	33.864	0.9477	0.0939		17.8849	9.48649	1.91242
190070	33.892	0.9487	0.0941		17.8996	9.4965	1.9165
190270	33.924	0.9497	0.0943		17.9165	9.50651	1.92057
190470	33.954	0.9507	0.0945		17.9324	9.51652	1.92464
190671	33.984	0.9517	0.0947		17.9482	9.52653	1.92872
190872	34.014	0.9525	0.0949		17.9641	9.53453	1.93279
191072	34.044	0.9535	0.095		17.9799	9.54454	1.93483
191272	34.078	0.9546	0.0953		17.9979	9.55556	1.94094
191472	34.11	0.9556	0.0954		18.0148	9.56557	1.94297
191673	34.144	0.9566	0.0955		18.0327	9.57558	1.94501
191874	34.178	0.9577	0.0957		18.0507	9.58659	1.94908
192074	34.216	0.9587	0.0959		18.0708	9.5966	1.95316
192274	34.244	0.9597	0.0961		18.0855	9.60661	1.95723
192474	34.272	0.9607	0.0964		18.1003	9.61662	1.96334
192675	34.302	0.9617	0.0964		18.1162	9.62663	1.96334
192877	34.328	0.9626	0.0966		18.1299	9.63564	1.96741
193078	34.356	0.9637	0.097		18.1447	9.64665	1.97556
193278	34.386	0.9646	0.0971		18.1605	9.65566	1.9776
193478	34.42	0.9656	0.0972		18.1785	9.66567	1.97963
193678	34.452	0.9665	0.0974		18.1954	9.67467	1.98371
193879	34.484	0.9676	0.0977		18.2123	9.68569	1.98982
194080	34.532	0.9687	0.0978		18.2376	9.6967	1.99185
194280	34.57	0.9698	0.0981		18.2577	9.70771	1.99796
194480	34.604	0.9708	0.0983		18.2757	9.71772	2.00204
194680	34.634	0.9718	0.0984		18.2915	9.72773	2.00407
194881	34.658	0.9729	0.0987		18.3042	9.73874	2.01018
195082	34.682	0.9739	0.0989		18.3169	9.74875	2.01426
195282	34.714	0.9748	0.0991		18.3338	9.75776	2.01833
195482	34.742	0.9759	0.0993		18.3486	9.76877	2.0224
195682	34.772	0.9768	0.0995		18.3644	9.77778	2.02648
195883	34.8	0.9778	0.0997		18.3792	9.78779	2.03055
196085	34.828	0.9789	0.0999		18.394	9.7988	2.03462
196286	34.862	0.9798	0.1002		18.4119	9.80781	2.04073
196486	34.894	0.9808	0.1003		18.4288	9.81782	2.04277
196686	34.924	0.9818	0.1005		18.4447	9.82783	2.04684
196886	34.958	0.9829	0.1007		18.4626	9.83884	2.05092
197087	34.984	0.9838	0.1009		18.4764	9.84785	2.05499
197288	35.016	0.9848	0.1012		18.4933	9.85786	2.0611
197488	35.052	0.9858	0.1014		18.5123	9.86787	2.06517
197688	35.082	0.9867	0.1015		18.5281	9.87688	2.06721
197888	35.108	0.9879	0.1017		18.5419	9.88889	2.07128
198089	35.142	0.9888	0.1019		18.5598	9.8979	2.07536
198290	35.168	0.9898	0.1021		18.5735	9.90791	2.07943
198490	35.2	0.9908	0.1023		18.5904	9.91792	2.0835
198690	35.238	0.9919	0.1025		18.6105	9.92893	2.08758
198890	35.268	0.9928	0.1028		18.6264	9.93794	2.09369
199091	35.294	0.9938	0.1029		18.6401	9.94795	2.09572
199293	35.326	0.9948	0.1031		18.657	9.95796	2.0998
199494	35.354	0.9958	0.1034		18.6718	9.96797	2.10591
199694	35.382	0.9969	0.1034		18.6866	9.97898	2.10591
199894	35.408	0.9977	0.1037		18.7003	9.98699	2.11202
200094	35.434	0.9989	0.1039		18.714	9.999	2.11609
200295	35.464	0.9998	0.1041		18.7299	10.008	2.12016
200496	35.494	1.0008	0.1043		18.7457	10.018	2.12424
200696	35.522	1.0017	0.1045		18.7605	10.027	2.12831
200896	35.55	1.0028	0.1047		18.7753	10.038	2.13238
201096	35.58	1.0038	0.105		18.7911	10.048	2.13849
201297	35.608	1.0048	0.1051		18.8059	10.0581	2.14053
201498	35.638	1.0056	0.1053		18.8218	10.0661	2.1446
201698	35.672	1.0068	0.1056		18.8397	10.0781	2.15071
201898	35.704	1.0078	0.1057		18.8566	10.0881	2.15275
202098	35.734	1.0088	0.106		18.8725	10.0981	2.15886
202299	35.772	1.0097	0.1061		18.8925	10.1071	2.1609
202500	35.804	1.0108	0.1063		18.9094	10.1181	2.16497
202700	35.832	1.0119	0.1066		18.9242	10.1291	2.17108
202900	35.872	1.013	0.1068		18.9454	10.1401	2.17515
203100	35.904	1.0139	0.1071		18.9623	10.1491	2.18126
203301	35.934	1.015	0.1072		18.9781	10.1602	2.1833
203503	35.96	1.0159	0.1075		18.9918	10.1692	2.18941
203704	35.986	1.0169	0.1077		19.0056	10.1792	2.19348
203904	36.016	1.0179	0.1079		19.0214	10.1892	2.19756
204104	36.04	1.0189	0.1082		19.0341	10.1992	2.20367
204304	36.066	1.02	0.1084		19.0478	10.2102	2.20774
204505	36.096	1.0208	0.1085		19.0637	10.2182	2.20978
204706	36.122	1.022	0.1088		19.0774	10.2302	2.21589
204906	36.146	1.0229	0.1089		19.0901	10.2392	2.21792
205106	36.176	1.0239	0.1091		19.1059	10.2492	2.222
205306	36.206	1.0248	0.1093		19.1218	10.2583	2.22607
205507	36.234	1.0259	0.1096		19.1365	10.2693	2.23218
205708	36.262	1.0269	0.1097		19.1513	10.2793	2.23422
205908	36.292	1.0278	0.11		19.1672	10.2883	2.24033
206108	36.328	1.0288	0.1102		19.1862	10.2983	2.2444
206308	36.358	1.0299	0.1104		19.202	10.3093	2.24847
206509	36.386	1.0308	0.1107		19.2168	10.3183	2.25458
206711	36.416	1.0319	0.1109		19.2327	10.3293	2.25866
206912	36.444	1.0329	0.1111		19.2474	10.3393	2.26273
207112	36.474	1.034	0.1113		19.2633	10.3504	2.2668
207312	36.498	1.0348	0.1115		19.276	10.3584	2.27088
207512	36.53	1.0359	0.1117		19.2929	10.3694	2.27495
207713	36.556	1.0369	0.1121		19.3066	10.3794	2.2831
207914	36.584	1.0379	0.1122		19.3214	10.3894	2.28513
208114	36.604	1.039	0.1124		19.332	10.4004	2.28921
208314	36.626	1.04	0.1126		19.3436	10.4104	2.29328
208514	36.652	1.0409	0.1129		19.3573	10.4194	2.29939
208715	36.68	1.0419	0.113		19.3721	10.4294	2.30143
208916	36.706	1.043	0.1132		19.3858	10.4404	2.3055
209116	36.738	1.0439	0.1136		19.4027	10.4494	2.31365
209316	36.762	1.0448	0.1137		19.4154	10.4585	2.31568
209516	36.794	1.0458	0.114		19.4323	10.4685	2.32179
209717	36.816	1.0469	0.1142		19.4439	10.4795	2.32587
209919	36.844	1.0477	0.1144		19.4587	10.4875	2.32994
210120	36.87	1.0489	0.1146		19.4724	10.4995	2.33401
210320	36.902	1.0498	0.1149		19.4893	10.5085	2.34012
210520	36.932	1.0509	0.1151		19.5052	10.5195	2.3442
210720	36.964	1.0518	0.1153		19.5221	10.5285	2.34827
210921	36.99	1.0529	0.1155		19.5358	10.5395	2.35234
211122	37.016	1.0538	0.1158		19.5495	10.5485	2.35845
211322	37.044	1.0548	0.116		19.5643	10.5586	2.36253
211522	37.072	1.0559	0.1163		19.5791	10.5696	2.36864
211722	37.1	1.0569	0.1164		19.5939	10.5796	2.37067
211923	37.126	1.0578	0.1166		19.6076	10.5886	2.37475
212124	37.152	1.0588	0.1168		19.6214	10.5986	2.37882
212324	37.178	1.0598	0.1171		19.6351	10.6086	2.38493
212524	37.206	1.0608	0.1173		19.6499	10.6186	2.389
212724	37.238	1.0619	0.1176		19.6668	10.6296	2.39511
212925	37.258	1.0629	0.1178		19.6774	10.6396	2.39919
213127	37.282	1.0638	0.118		19.69	10.6486	2.40326
213328	37.306	1.0647	0.1182		19.7027	10.6577	2.40733
213528	37.332	1.0658	0.1184		19.7164	10.6687	2.41141
213728	37.358	1.0668	0.1187		19.7302	10.6787	2.41752
213928	37.388	1.0678	0.1189		19.746	10.6887	2.42159
214129	37.414	1.0688	0.1191		19.7597	10.6987	2.42566
214330	37.442	1.0698	0.1193		19.7745	10.7087	2.42974
214530	37.468	1.0709	0.1196		19.7883	10.7197	2.43585
214730	37.49	1.0718	0.1199		19.7999	10.7287	2.44196
214930	37.52	1.0727	0.1201		19.8157	10.7377	2.44603
215131	37.548	1.0738	0.1203		19.8305	10.7487	2.4501
215332	37.578	1.0747	0.1205		19.8464	10.7578	2.45418
215532	37.606	1.0757	0.1208		19.8611	10.7678	2.46029
215732	37.632	1.0768	0.121		19.8749	10.7788	2.46436
215932	37.654	1.0777	0.1212		19.8865	10.7878	2.46843
216133	37.682	1.0789	0.1215		19.9013	10.7998	2.47454
216335	37.708	1.0798	0.1217		19.915	10.8088	2.47862
216536	37.736	1.0807	0.1219		19.9298	10.8178	2.48269
216736	37.764	1.0817	0.1221		19.9446	10.8278	2.48676
216936	37.79	1.0828	0.1224		19.9583	10.8388	2.49287
217136	37.816	1.0837	0.1226		19.9721	10.8478	2.49695
217337	37.842	1.0848	0.1228		19.9858	10.8589	2.50102
217538	37.87	1.0858	0.123		20.0006	10.8689	2.50509
217738	37.892	1.0868	0.1233		20.0122	10.8789	2.5112
217938	37.918	1.0878	0.1235		20.0259	10.8889	2.51527
218138	37.944	1.0889	0.1238		20.0397	10.8999	2.52138
218339	37.97	1.0898	0.1241		20.0534	10.9089	2.52749
218540	37.99	1.0908	0.1243		20.0639	10.9189	2.53157
218740	38.014	1.0918	0.1245		20.0766	10.9289	2.53564
218940	38.04	1.0928	0.1247		20.0904	10.9389	2.53971
219140	38.064	1.0937	0.125		20.103	10.9479	2.54582
219341	38.088	1.0947	0.1251		20.1157	10.958	2.54786
219543	38.114	1.0958	0.1254		20.1294	10.969	2.55397
219744	38.138	1.0966	0.1256		20.1421	10.977	2.55804
219944	38.18	1.0978	0.1258		20.1643	10.989	2.56212
220144	38.22	1.0988	0.1261		20.1854	10.999	2.56823
220344	38.258	1.1	0.1264		20.2055	11.011	2.57434
220545	38.292	1.1011	0.1266		20.2234	11.022	2.57841
220746	38.318	1.1021	0.1268		20.2372	11.032	2.58248
220946	38.344	1.1032	0.127		20.2509	11.043	2.58656
221146	38.368	1.1043	0.1273		20.2636	11.0541	2.59267
221346	38.388	1.1052	0.1276		20.2741	11.0631	2.59878
221547	38.404	1.1063	0.1278		20.2826	11.0741	2.60285
221748	38.424	1.1073	0.128		20.2932	11.0841	2.60692
221948	38.444	1.1082	0.1283		20.3037	11.0931	2.61303
222148	38.458	1.109	0.1286		20.3111	11.1011	2.61914
222348	38.482	1.1101	0.1288		20.3238	11.1121	2.62322
222549	38.502	1.111	0.129		20.3344	11.1211	2.62729
222750	38.522	1.112	0.1293		20.3449	11.1311	2.6334
222950	38.544	1.113	0.1295		20.3565	11.1411	2.63747
223150	38.57	1.1139	0.1297		20.3703	11.1502	2.64155
223350	38.592	1.1149	0.13		20.3819	11.1602	2.64766
223551	38.618	1.116	0.1302		20.3956	11.1712	2.65173
223753	38.64	1.117	0.1305		20.4072	11.1812	2.65784
223954	38.666	1.1181	0.1307		20.421	11.1922	2.66191
224154	38.688	1.119	0.1311		20.4326	11.2012	2.67006
224354	38.716	1.1199	0.1312		20.4474	11.2102	2.6721
224554	38.74	1.121	0.1314		20.4601	11.2212	2.67617
224755	38.77	1.1219	0.1317		20.4759	11.2302	2.68228
224956	38.798	1.123	0.1319		20.4907	11.2412	2.68635
225156	38.824	1.124	0.1322		20.5044	11.2513	2.69246
225356	38.85	1.125	0.1325		20.5181	11.2613	2.69857
225556	38.872	1.1262	0.1327		20.5298	11.2733	2.70265
225757	38.894	1.1271	0.133		20.5414	11.2823	2.70876
225958	38.912	1.1281	0.1332		20.5509	11.2923	2.71283
226158	38.938	1.1291	0.1334		20.5646	11.3023	2.7169
226358	38.956	1.13	0.1337		20.5741	11.3113	2.72301
226558	38.984	1.131	0.134		20.5889	11.3213	2.72912
226759	39.004	1.1322	0.1343		20.5995	11.3333	2.73523
226961	39.03	1.133	0.1345		20.6132	11.3413	2.73931
227162	39.052	1.1341	0.1348		20.6248	11.3524	2.74542
227362	39.074	1.1351	0.135		20.6365	11.3624	2.74949
227562	39.098	1.1361	0.1353		20.6491	11.3724	2.7556
227762	39.12	1.1369	0.1355		20.6607	11.3804	2.75967
227963	39.142	1.138	0.1357		20.6724	11.3914	2.76375
228164	39.164	1.139	0.136		20.684	11.4014	2.76986
228364	39.186	1.14	0.1363		20.6956	11.4114	2.77597
228564	39.204	1.1409	0.1366		20.7051	11.4204	2.78208
228764	39.23	1.142	0.1367		20.7188	11.4314	2.78411
228965	39.252	1.143	0.1371		20.7305	11.4414	2.79226
229166	39.274	1.144	0.1374		20.7421	11.4515	2.79837
229366	39.298	1.145	0.1376		20.7548	11.4615	2.80244
229566	39.318	1.146	0.1379		20.7653	11.4715	2.80855
229766	39.344	1.147	0.1381		20.779	11.4815	2.81263
229967	39.368	1.148	0.1383		20.7917	11.4915	2.8167
230169	39.394	1.1489	0.1386		20.8055	11.5005	2.82281
230370	39.422	1.15	0.1389		20.8202	11.5115	2.82892
230570	39.444	1.1511	0.1391		20.8319	11.5225	2.83299
230770	39.47	1.152	0.1394		20.8456	11.5315	2.8391
230970	39.494	1.153	0.1396		20.8583	11.5415	2.84318
231171	39.514	1.154	0.1399		20.8688	11.5516	2.84929
231372	39.536	1.1551	0.1401		20.8805	11.5626	2.85336
231572	39.562	1.156	0.1404		20.8942	11.5716	2.85947
231772	39.58	1.1572	0.1407		20.9037	11.5836	2.86558
231972	39.598	1.158	0.1409		20.9132	11.5916	2.86965
232173	39.622	1.1591	0.1412		20.9259	11.6026	2.87576
232374	39.642	1.16	0.1414		20.9364	11.6116	2.87984
232574	39.664	1.1611	0.1417		20.9481	11.6226	2.88595
232774	39.684	1.1621	0.1419		20.9586	11.6326	2.89002
232974	39.704	1.163	0.1421		20.9692	11.6416	2.89409
233175	39.728	1.164	0.1425		20.9819	11.6517	2.90224
233377	39.746	1.165	0.1427		20.9914	11.6617	2.90631
233578	39.764	1.166	0.143		21.0009	11.6717	2.91242
233778	39.786	1.167	0.1432		21.0125	11.6817	2.9165
233978	39.806	1.1681	0.1434		21.023	11.6927	2.92057
234178	39.83	1.169	0.1437		21.0357	11.7017	2.92668
234379	39.848	1.1701	0.144		21.0452	11.7127	2.93279
234580	39.87	1.1711	0.1443		21.0568	11.7227	2.9389
234780	39.89	1.172	0.1446		21.0674	11.7317	2.94501
234980	39.91	1.1731	0.1448		21.078	11.7427	2.94908
235180	39.928	1.174	0.1451		21.0875	11.7518	2.95519
235381	39.946	1.1751	0.1453		21.097	11.7628	2.95927
235582	39.964	1.176	0.1455		21.1065	11.7718	2.96334
235782	39.984	1.1771	0.1459		21.1171	11.7828	2.97149
235982	40.004	1.178	0.1461		21.1276	11.7918	2.97556
236182	40.03	1.179	0.1464		21.1414	11.8018	2.98167
236383	40.05	1.18	0.1466		21.1519	11.8118	2.98574
236585	40.072	1.181	0.1469		21.1635	11.8218	2.99185
236786	40.096	1.182	0.1472		21.1762	11.8318	2.99796
236986	40.114	1.183	0.1475		21.1857	11.8418	3.00407
237186	40.136	1.1839	0.1477		21.1973	11.8509	3.00815
237386	40.16	1.185	0.148		21.21	11.8619	3.01426
237587	40.178	1.1861	0.1483		21.2195	11.8729	3.02037
237788	40.198	1.1871	0.1484		21.2301	11.8829	3.0224
237988	40.222	1.188	0.1488		21.2428	11.8919	3.03055
238188	40.244	1.1891	0.149		21.2544	11.9029	3.03462
238388	40.262	1.19	0.1492		21.2639	11.9119	3.0387
238589	40.282	1.1911	0.1496		21.2744	11.9229	3.04684
238790	40.304	1.192	0.1499		21.2861	11.9319	3.05295
238990	40.324	1.193	0.15		21.2966	11.9419	3.05499
239190	40.342	1.1941	0.1504		21.3061	11.953	3.06314
239390	40.362	1.195	0.1506		21.3167	11.962	3.06721
239591	40.38	1.1961	0.1508		21.3262	11.973	3.07128
239793	40.402	1.1971	0.1511		21.3378	11.983	3.07739
239994	40.42	1.198	0.1513		21.3473	11.992	3.08147
240194	40.44	1.1991	0.1517		21.3579	12.003	3.08961
240394	40.458	1.2	0.1519		21.3674	12.012	3.09369
240594	40.476	1.201	0.1522		21.3769	12.022	3.0998
240795	40.496	1.2021	0.1525		21.3875	12.033	3.10591
240996	40.52	1.203	0.1527		21.4001	12.042	3.10998
241196	40.536	1.204	0.153		21.4086	12.0521	3.11609
241396	40.558	1.2051	0.1533		21.4202	12.0631	3.1222
241596	40.572	1.206	0.1535		21.4276	12.0721	3.12627
241797	40.59	1.207	0.1538		21.4371	12.0821	3.13238
241998	40.62	1.2082	0.1541		21.453	12.0941	3.13849
242198	40.65	1.209	0.1544		21.4688	12.1021	3.1446
242398	40.676	1.2101	0.1546		21.4825	12.1131	3.14868
242598	40.696	1.2112	0.155		21.4931	12.1241	3.15682
242799	40.718	1.2123	0.1552		21.5047	12.1351	3.1609
243000	40.74	1.2132	0.1556		21.5163	12.1441	3.16904
243200	40.75	1.2143	0.1557		21.5216	12.1552	3.17108
243400	40.762	1.2152	0.156		21.5279	12.1642	3.17719
243600	40.782	1.2162	0.1564		21.5385	12.1742	3.18534
243801	40.8	1.2171	0.1566		21.548	12.1832	3.18941
244003	40.818	1.2181	0.1569		21.5575	12.1932	3.19552
244204	40.836	1.2191	0.1571		21.567	12.2032	3.19959
244404	40.854	1.2203	0.1574		21.5765	12.2152	3.2057
244604	40.876	1.2213	0.1577		21.5882	12.2252	3.21181
244804	40.896	1.2223	0.158		21.5987	12.2352	3.21792
245005	40.914	1.2232	0.1583		21.6082	12.2442	3.22403
245206	40.928	1.2243	0.1585		21.6156	12.2553	3.22811
245406	40.95	1.2253	0.1589		21.6272	12.2653	3.23625
245606	40.97	1.2263	0.1592		21.6378	12.2753	3.24236
245806	40.988	1.2274	0.1594		21.6473	12.2863	3.24644
246007	41.008	1.2284	0.1597		21.6579	12.2963	3.25255
246208	41.02	1.2292	0.1601		21.6642	12.3043	3.26069
246408	41.036	1.2303	0.1603		21.6727	12.3153	3.26477
246608	41.05	1.2313	0.1605		21.6801	12.3253	3.26884
246808	41.07	1.2323	0.1608		21.6906	12.3353	3.27495
247009	41.088	1.2333	0.1611		21.7001	12.3453	3.28106
247211	41.098	1.2344	0.1613		21.7054	12.3564	3.28513
247412	41.116	1.2352	0.1616		21.7149	12.3644	3.29124
247612	41.124	1.2361	0.1619		21.7191	12.3734	3.29735
247812	41.136	1.2372	0.1622		21.7255	12.3844	3.30346
248012	41.162	1.238	0.1624		21.7392	12.3924	3.30754
248213	41.178	1.2391	0.1627		21.7477	12.4034	3.31365
248414	41.194	1.2401	0.163		21.7561	12.4134	3.31976
248614	41.21	1.2413	0.1633		21.7646	12.4254	3.32587
248814	41.226	1.2421	0.1636		21.773	12.4334	3.33198
249014	41.24	1.2431	0.1638		21.7804	12.4434	3.33605
249215	41.26	1.2442	0.1642		21.791	12.4545	3.3442
249416	41.278	1.245	0.1644		21.8005	12.4625	3.34827
249616	41.294	1.2461	0.1647		21.8089	12.4735	3.35438
249816	41.316	1.2471	0.165		21.8205	12.4835	3.36049
250016	41.334	1.2482	0.1652		21.83	12.4945	3.36456
250217	41.352	1.2491	0.1655		21.8395	12.5035	3.37067
250419	41.372	1.2501	0.1659		21.8501	12.5135	3.37882
250620	41.392	1.2512	0.1661		21.8607	12.5245	3.38289
250820	41.408	1.2522	0.1664		21.8691	12.5345	3.389
251020	41.422	1.2532	0.1667		21.8765	12.5445	3.39511
251220	41.438	1.2541	0.1671		21.885	12.5536	3.40326
251421	41.448	1.2551	0.1672		21.8902	12.5636	3.4053
251622	41.468	1.2562	0.1676		21.9008	12.5746	3.41344
251822	41.482	1.2571	0.1679		21.9082	12.5836	3.41955
252022	41.498	1.2581	0.1682		21.9167	12.5936	3.42566
252222	41.514	1.2592	0.1685		21.9251	12.6046	3.43177
252423	41.53	1.2601	0.1688		21.9336	12.6136	3.43788
252624	41.55	1.2611	0.1691		21.9441	12.6236	3.44399
252824	41.564	1.2621	0.1694		21.9515	12.6336	3.4501
253024	41.58	1.2631	0.1697		21.96	12.6436	3.45621
253224	41.59	1.2642	0.1698		21.9652	12.6547	3.45825
253425	41.598	1.2652	0.1702		21.9695	12.6647	3.4664
253627	41.616	1.2662	0.1705		21.979	12.6747	3.47251
253828	41.626	1.2671	0.1708		21.9843	12.6837	3.47862
254028	41.638	1.2682	0.1712		21.9906	12.6947	3.48676
254228	41.65	1.2691	0.1715		21.9969	12.7037	3.49287
254428	41.664	1.2701	0.1717		22.0043	12.7137	3.49695
254629	41.674	1.2711	0.172		22.0096	12.7237	3.50305
254830	41.692	1.2721	0.1722		22.0191	12.7337	3.50713
255030	41.704	1.2731	0.1725		22.0255	12.7437	3.51324
255230	41.724	1.274	0.173		22.036	12.7528	3.52342
255430	41.736	1.2751	0.1732		22.0424	12.7638	3.52749
255631	41.756	1.2761	0.1736		22.0529	12.7738	3.53564
255832	41.768	1.2771	0.1738		22.0593	12.7838	3.53971
256032	41.782	1.2781	0.1741		22.0666	12.7938	3.54582
256232	41.794	1.2791	0.1745		22.073	12.8038	3.55397
256432	41.81	1.2802	0.1748		22.0814	12.8148	3.56008
256633	41.822	1.2811	0.175		22.0878	12.8238	3.56415
256835	41.838	1.282	0.1753		22.0962	12.8328	3.57026
257036	41.848	1.2831	0.1757		22.1015	12.8438	3.57841
257236	41.864	1.2842	0.1761		22.11	12.8549	3.58656
257436	41.88	1.2851	0.1763		22.1184	12.8639	3.59063
257636	41.898	1.2861	0.1766		22.1279	12.8739	3.59674
257837	41.914	1.287	0.177		22.1364	12.8829	3.60489
258038	41.936	1.2881	0.1773		22.148	12.8939	3.611
258238	41.958	1.2892	0.1775		22.1596	12.9049	3.61507
258438	41.978	1.2901	0.1778		22.1702	12.9139	3.62118
258638	41.992	1.2913	0.1781		22.1776	12.9259	3.62729
258839	42.008	1.2923	0.1785		22.186	12.9359	3.63544
259040	42.018	1.2933	0.1788		22.1913	12.9459	3.64155
259240	42.03	1.2942	0.179		22.1976	12.955	3.64562
259440	42.05	1.2953	0.1794		22.2082	12.966	3.65377
259640	42.056	1.2963	0.1797		22.2114	12.976	3.65988
259841	42.064	1.2971	0.1799		22.2156	12.984	3.66395
260043	42.078	1.2982	0.1803		22.223	12.995	3.6721
260244	42.086	1.2992	0.1806		22.2272	13.005	3.67821
260444	42.098	1.3001	0.1809		22.2335	13.014	3.68432
260644	42.114	1.3011	0.1811		22.242	13.024	3.68839
260844	42.126	1.3021	0.1815		22.2483	13.034	3.69654
261045	42.14	1.3032	0.1818		22.2557	13.045	3.70265
261246	42.152	1.3041	0.1822		22.2621	13.0541	3.71079
261446	42.17	1.3052	0.1825		22.2716	13.0651	3.7169
261646	42.184	1.3061	0.1827		22.279	13.0741	3.72098
261846	42.202	1.3073	0.1831		22.2885	13.0861	3.72912
262047	42.208	1.3082	0.1834		22.2916	13.0951	3.73523
262248	42.224	1.3092	0.1836		22.3001	13.1051	3.73931
262448	42.234	1.3102	0.1839		22.3054	13.1151	3.74542
262648	42.244	1.3111	0.1842		22.3106	13.1241	3.75153
262848	42.262	1.3121	0.1845		22.3202	13.1341	3.75764
263049	42.276	1.3131	0.1847		22.3275	13.1441	3.76171
263250	42.286	1.3142	0.1851		22.3328	13.1552	3.76986
263450	42.298	1.3151	0.1854		22.3392	13.1642	3.77597
263650	42.314	1.3161	0.1858		22.3476	13.1742	3.78411
263850	42.328	1.3171	0.1861		22.355	13.1842	3.79022
264051	42.34	1.3182	0.1864		22.3613	13.1952	3.79633
264253	42.362	1.3192	0.1867		22.373	13.2052	3.80244
264454	42.382	1.3203	0.187		22.3835	13.2162	3.80855
264654	42.394	1.3214	0.1873		22.3899	13.2272	3.81466
264854	42.412	1.3223	0.1877		22.3994	13.2362	3.82281
265054	42.424	1.3233	0.1879		22.4057	13.2462	3.82688
265255	42.436	1.3243	0.1883		22.412	13.2563	3.83503
265456	42.45	1.3253	0.1886		22.4194	13.2663	3.84114
265656	42.464	1.3263	0.1889		22.4268	13.2763	3.84725
265856	42.476	1.3273	0.1893		22.4332	13.2863	3.8554
266056	42.488	1.3284	0.1896		22.4395	13.2973	3.86151
266257	42.496	1.3293	0.1899		22.4437	13.3063	3.86762
266458	42.506	1.3302	0.1903		22.449	13.3153	3.87576
266658	42.52	1.3313	0.1906		22.4564	13.3263	3.88187
266858	42.532	1.3323	0.1909		22.4628	13.3363	3.88798
267058	42.544	1.3333	0.1913		22.4691	13.3463	3.89613
267259	42.556	1.3343	0.1916		22.4754	13.3564	3.90224
267461	42.568	1.3353	0.1918		22.4818	13.3664	3.90631
267662	42.584	1.3363	0.1922		22.4902	13.3764	3.91446
267862	42.594	1.3373	0.1925		22.4955	13.3864	3.92057
268062	42.606	1.3383	0.1928		22.5018	13.3964	3.92668
268262	42.62	1.3392	0.1932		22.5092	13.4054	3.93483
268463	42.628	1.3403	0.1935		22.5135	13.4164	3.94094
268664	42.64	1.3413	0.1939		22.5198	13.4264	3.94908
268864	42.656	1.3424	0.1943		22.5282	13.4374	3.95723
269064	42.672	1.3435	0.1946		22.5367	13.4484	3.96334
269264	42.688	1.3444	0.1949		22.5451	13.4575	3.96945
269465	42.7	1.3454	0.1953		22.5515	13.4675	3.9776
269666	42.71	1.3466	0.1956		22.5568	13.4795	3.98371
269866	42.726	1.3475	0.196		22.5652	13.4885	3.99185
270066	42.736	1.3485	0.1963		22.5705	13.4985	3.99796
270266	42.746	1.3494	0.1967		22.5758	13.5075	4.00611
270467	42.756	1.3505	0.197		22.5811	13.5185	4.01222
270669	42.77	1.3514	0.1973		22.5884	13.5275	4.01833
270870	42.78	1.3525	0.1977		22.5937	13.5385	4.02648
271070	42.788	1.3535	0.198		22.598	13.5485	4.03259
271270	42.798	1.3545	0.1983		22.6032	13.5586	4.0387
271470	42.808	1.3555	0.1987		22.6085	13.5686	4.04684
271671	42.818	1.3565	0.1989		22.6138	13.5786	4.05092
271872	42.828	1.3574	0.1993		22.6191	13.5876	4.05906
272072	42.836	1.3585	0.1997		22.6233	13.5986	4.06721
272272	42.844	1.3594	0.1999		22.6275	13.6076	4.07128
272472	42.858	1.3605	0.2003		22.6349	13.6186	4.07943
272673	42.874	1.3615	0.2007		22.6434	13.6286	4.08758
272874	42.88	1.3625	0.201		22.6465	13.6386	4.09369
273074	42.892	1.3635	0.2013		22.6529	13.6486	4.0998
273274	42.902	1.3645	0.2017		22.6582	13.6587	4.10794
273474	42.914	1.3654	0.202		22.6645	13.6677	4.11405
273675	42.922	1.3665	0.2023		22.6687	13.6787	4.12016
273877	42.932	1.3674	0.2027		22.674	13.6877	4.12831
274078	42.938	1.3684	0.203		22.6772	13.6977	4.13442
274278	42.946	1.3694	0.2034		22.6814	13.7077	4.14257
274478	42.952	1.3704	0.2036		22.6846	13.7177	4.14664
274678	42.962	1.3715	0.2041		22.6899	13.7287	4.15682
274879	42.972	1.3724	0.2044		22.6951	13.7377	4.16293
275080	42.98	1.3733	0.2048		22.6994	13.7467	4.17108
275280	42.994	1.3744	0.2052		22.7068	13.7578	4.17923
275480	43.002	1.3755	0.2055		22.711	13.7688	4.18534
275680	43.012	1.3764	0.2058		22.7163	13.7778	4.19145
275881	43.018	1.3775	0.2062		22.7194	13.7888	4.19959
276082	43.028	1.3785	0.2065		22.7247	13.7988	4.2057
276282	43.034	1.3795	0.2068		22.7279	13.8088	4.21181
276482	43.046	1.3805	0.2072		22.7342	13.8188	4.21996
276682	43.054	1.3815	0.2076		22.7384	13.8288	4.22811
276883	43.064	1.3823	0.208		22.7437	13.8368	4.23625
277085	43.074	1.3835	0.2083		22.749	13.8488	4.24236
277286	43.08	1.3843	0.2086		22.7522	13.8569	4.24847
277486	43.09	1.3853	0.209		22.7575	13.8669	4.25662
277686	43.102	1.3863	0.2093		22.7638	13.8769	4.26273
277886	43.114	1.3874	0.2096		22.7701	13.8879	4.26884
278087	43.126	1.3883	0.21		22.7765	13.8969	4.27699
278288	43.138	1.3893	0.2103		22.7828	13.9069	4.2831
278488	43.15	1.3903	0.2107		22.7891	13.9169	4.29124
278688	43.164	1.3915	0.2109		22.7965	13.9289	4.29532
278888	43.176	1.3924	0.2113		22.8029	13.9379	4.30346
279089	43.186	1.3934	0.2117		22.8082	13.9479	4.31161
279290	43.196	1.3944	0.212		22.8134	13.958	4.31772
279490	43.204	1.3954	0.2123		22.8177	13.968	4.32383
279690	43.214	1.3965	0.2127		22.8229	13.979	4.33198
279890	43.222	1.3974	0.2131		22.8272	13.988	4.34012
280091	43.23	1.3985	0.2134		22.8314	13.999	4.34623
280293	43.238	1.3995	0.2137		22.8356	14.009	4.35234
280494	43.248	1.4006	0.2141		22.8409	14.02	4.36049
280694	43.258	1.4014	0.2144		22.8462	14.028	4.3666
280894	43.268	1.4024	0.2147		22.8515	14.038	4.37271
281094	43.274	1.4034	0.2151		22.8546	14.048	4.38086
281295	43.286	1.4045	0.2153		22.861	14.0591	4.38493
281496	43.294	1.4055	0.2157		22.8652	14.0691	4.39308
281696	43.304	1.4065	0.2161		22.8705	14.0791	4.40122
281896	43.31	1.4075	0.2164		22.8736	14.0891	4.40733
282096	43.314	1.4086	0.2168		22.8758	14.1001	4.41548
282297	43.318	1.4095	0.2171		22.8779	14.1091	4.42159
282498	43.33	1.4106	0.2174		22.8842	14.1201	4.4277
282698	43.336	1.4115	0.2179		22.8874	14.1291	4.43788
282898	43.348	1.4125	0.2182		22.8937	14.1391	4.44399
283098	43.356	1.4135	0.2186		22.8979	14.1491	4.45214
283299	43.366	1.4146	0.2189		22.9032	14.1602	4.45825
283500	43.382	1.4157	0.2192		22.9117	14.1712	4.46436
283700	43.4	1.4166	0.2197		22.9212	14.1802	4.47454
283900	43.408	1.4177	0.2199		22.9254	14.1912	4.47862
284100	43.412	1.4187	0.2203		22.9275	14.2012	4.48676
284301	43.418	1.4197	0.2207		22.9307	14.2112	4.49491
284503	43.424	1.4206	0.2211		22.9338	14.2202	4.50305
284704	43.434	1.4217	0.2215		22.9391	14.2312	4.5112
284904	43.44	1.4226	0.2218		22.9423	14.2402	4.51731
285104	43.442	1.4237	0.2222		22.9434	14.2513	4.52546
285304	43.452	1.4247	0.2225		22.9486	14.2613	4.53157
285505	43.46	1.4257	0.2229		22.9529	14.2713	4.53971
285706	43.466	1.4265	0.2232		22.956	14.2793	4.54582
285906	43.47	1.4277	0.2236		22.9581	14.2913	4.55397
286106	43.476	1.4286	0.2241		22.9613	14.3003	4.56415
286306	43.486	1.4297	0.2244		22.9666	14.3113	4.57026
286507	43.492	1.4306	0.2248		22.9698	14.3203	4.57841
286708	43.496	1.4316	0.2252		22.9719	14.3303	4.58656
286908	43.504	1.4326	0.2254		22.9761	14.3403	4.59063
287108	43.508	1.4338	0.2259		22.9782	14.3524	4.60081
287308	43.514	1.4346	0.2262		22.9814	14.3604	4.60692
287509	43.518	1.4356	0.2266		22.9835	14.3704	4.61507
287711	43.524	1.4366	0.227		22.9867	14.3804	4.62322
287912	43.532	1.4376	0.2274		22.9909	14.3904	4.63136
288112	43.538	1.4387	0.2278		22.9941	14.4014	4.63951
288312	43.546	1.4397	0.2281		22.9983	14.4114	4.64562
288512	43.552	1.4406	0.2285		23.0015	14.4204	4.65377
288713	43.56	1.4417	0.2289		23.0057	14.4314	4.66191
288914	43.57	1.4427	0.2292		23.011	14.4414	4.66802
289114	43.566	1.4437	0.2296		23.0088	14.4515	4.67617
289314	43.572	1.4447	0.23		23.012	14.4615	4.68432
289514	43.576	1.4458	0.2303		23.0141	14.4725	4.69043
289715	43.58	1.4467	0.2307		23.0162	14.4815	4.69857
289916	43.588	1.4478	0.2311		23.0205	14.4925	4.70672
290116	43.59	1.4487	0.2314		23.0215	14.5015	4.71283
290316	43.596	1.4496	0.2319		23.0247	14.5105	4.72301
290516	43.6	1.4506	0.2321		23.0268	14.5205	4.72709
290717	43.606	1.4516	0.2326		23.03	14.5305	4.73727
290919	43.614	1.4526	0.233		23.0342	14.5405	4.74542
291120	43.622	1.4537	0.2333		23.0384	14.5516	4.75153
291320	43.628	1.4546	0.2337		23.0416	14.5606	4.75967
291520	43.638	1.4556	0.234		23.0469	14.5706	4.76578
291720	43.644	1.4566	0.2344		23.05	14.5806	4.77393
291921	43.646	1.4576	0.2347		23.0511	14.5906	4.78004
292122	43.65	1.4587	0.2351		23.0532	14.6016	4.78819
292322	43.66	1.4596	0.2355		23.0585	14.6106	4.79633
292522	43.664	1.4607	0.2359		23.0606	14.6216	4.80448
292722	43.67	1.4617	0.2363		23.0638	14.6316	4.81263
292923	43.676	1.4627	0.2366		23.0669	14.6416	4.81874
293124	43.68	1.4637	0.2371		23.0691	14.6517	4.82892
293324	43.684	1.4646	0.2374		23.0712	14.6607	4.83503
293524	43.688	1.4656	0.2377		23.0733	14.6707	4.84114
293724	43.696	1.4667	0.2382		23.0775	14.6817	4.85132
293925	43.704	1.4677	0.2386		23.0817	14.6917	4.85947
294127	43.71	1.4687	0.2389		23.0849	14.7017	4.86558
294328	43.71	1.4696	0.2394		23.0849	14.7107	4.87576
294528	43.722	1.4706	0.2397		23.0912	14.7207	4.88187
294728	43.724	1.4717	0.2401		23.0923	14.7317	4.89002
294928	43.73	1.4727	0.2404		23.0955	14.7417	4.89613
295129	43.736	1.4736	0.2409		23.0986	14.7508	4.90631
295330	43.74	1.4746	0.2412		23.1007	14.7608	4.91242
295530	43.744	1.4758	0.2416		23.1029	14.7728	4.92057
295730	43.746	1.4766	0.242		23.1039	14.7808	4.92872
295930	43.752	1.4776	0.2425		23.1071	14.7908	4.9389
296131	43.762	1.4786	0.2428		23.1124	14.8008	4.94501
296332	43.768	1.4796	0.2431		23.1155	14.8108	4.95112
296532	43.778	1.4805	0.2435		23.1208	14.8198	4.95927
296732	43.78	1.4816	0.2439		23.1219	14.8308	4.96741
296932	43.782	1.4827	0.2443		23.1229	14.8418	4.97556
297133	43.79	1.4836	0.2447		23.1271	14.8509	4.98371
297335	43.796	1.4847	0.245		23.1303	14.8619	4.98982
297536	43.798	1.4856	0.2454		23.1314	14.8709	4.99796
297736	43.802	1.4867	0.2458		23.1335	14.8819	5.00611
297936	43.806	1.4877	0.2462		23.1356	14.8919	5.01426
298136	43.808	1.4886	0.2466		23.1367	14.9009	5.0224
298337	43.814	1.4897	0.2469		23.1398	14.9119	5.02851
298538	43.818	1.4906	0.2473		23.1419	14.9209	5.03666
298738	43.822	1.4917	0.2476		23.144	14.9319	5.04277
298938	43.828	1.4927	0.248		23.1472	14.9419	5.05092
299138	43.824	1.4937	0.2484		23.1451	14.952	5.05906
299339	43.824	1.4947	0.2488		23.1451	14.962	5.06721
299540	43.828	1.4958	0.2493		23.1472	14.973	5.07739
299740	43.826	1.4966	0.2497		23.1462	14.981	5.08554
299940	43.824	1.4977	0.2501		23.1451	14.992	5.09369
300140	43.826	1.4986	0.2504		23.1462	15.001	5.0998
300341	43.828	1.4997	0.2508		23.1472	15.012	5.10794
300543	43.828	1.5007	0.2512		23.1472	15.022	5.11609
300744	43.832	1.5018	0.2516		23.1493	15.033	5.12424
300944	43.836	1.5027	0.252		23.1514	15.042	5.13238
301144	43.84	1.5037	0.2525		23.1536	15.0521	5.14257
301344	43.84	1.5046	0.2528		23.1536	15.0611	5.14868
301545	43.844	1.5057	0.2533		23.1557	15.0721	5.15886
301746	43.846	1.5066	0.2537		23.1567	15.0811	5.16701
301946	43.85	1.5077	0.254		23.1588	15.0921	5.17312
302146	43.858	1.5086	0.2544		23.1631	15.1011	5.18126
302346	43.864	1.5098	0.2549		23.1662	15.1131	5.19145
302547	43.862	1.5108	0.2552		23.1652	15.1231	5.19756
302748	43.862	1.5117	0.2556		23.1652	15.1321	5.2057
302948	43.862	1.5127	0.256		23.1652	15.1421	5.21385
303148	43.864	1.5138	0.2563		23.1662	15.1532	5.21996
303348	43.866	1.5146	0.2567		23.1673	15.1612	5.22811
303549	43.868	1.5156	0.2571		23.1683	15.1712	5.23625
303750	43.87	1.5167	0.2576		23.1694	15.1822	5.24644
303950	43.876	1.5177	0.258		23.1726	15.1922	5.25458
304150	43.878	1.5186	0.2583		23.1736	15.2012	5.26069
304350	43.886	1.5197	0.2587		23.1778	15.2122	5.26884
304551	43.89	1.5206	0.2591		23.18	15.2212	5.27699
304753	43.892	1.5218	0.2595		23.181	15.2332	5.28513
304954	43.894	1.5226	0.26		23.1821	15.2412	5.29532
305154	43.9	1.5236	0.2603		23.1852	15.2513	5.30143
305354	43.906	1.5246	0.2607		23.1884	15.2613	5.30957
305554	43.908	1.5257	0.2612		23.1895	15.2723	5.31976
305755	43.912	1.5267	0.2615		23.1916	15.2823	5.32587
305956	43.916	1.5277	0.2619		23.1937	15.2923	5.33401
306156	43.918	1.5287	0.2624		23.1947	15.3023	5.3442
306356	43.922	1.5297	0.2628		23.1969	15.3123	5.35234
306556	43.922	1.5307	0.2631		23.1969	15.3223	5.35845
306757	43.926	1.5317	0.2636		23.199	15.3323	5.36864
306958	43.926	1.5327	0.2639		23.199	15.3423	5.37475
307158	43.932	1.5337	0.2643		23.2021	15.3524	5.38289
307358	43.936	1.5347	0.2647		23.2043	15.3624	5.39104
307558	43.938	1.5358	0.2651		23.2053	15.3734	5.39919
307759	43.938	1.5367	0.2656		23.2053	15.3824	5.40937
307961	43.94	1.5376	0.266		23.2064	15.3914	5.41752
308162	43.942	1.5388	0.2664		23.2074	15.4034	5.42566
308362	43.946	1.5397	0.2668		23.2095	15.4124	5.43381
308562	43.95	1.5409	0.2672		23.2117	15.4244	5.44196
308762	43.95	1.5417	0.2676		23.2117	15.4324	5.4501
308963	43.952	1.5427	0.268		23.2127	15.4424	5.45825
309164	43.952	1.5437	0.2685		23.2127	15.4525	5.46843
309364	43.954	1.5448	0.2689		23.2138	15.4635	5.47658
309564	43.958	1.5457	0.2692		23.2159	15.4725	5.48269
309764	43.96	1.5467	0.2697		23.2169	15.4825	5.49287
309965	43.96	1.5477	0.2701		23.2169	15.4925	5.50102
310166	43.96	1.5487	0.2705		23.2169	15.5025	5.50916
310366	43.96	1.5498	0.271		23.2169	15.5135	5.51935
310566	43.964	1.5507	0.2714		23.219	15.5225	5.52749
310766	43.966	1.5517	0.2718		23.2201	15.5325	5.53564
310967	43.97	1.5528	0.2721		23.2222	15.5435	5.54175
311169	43.972	1.5537	0.2726		23.2233	15.5526	5.55193
311370	43.97	1.5547	0.273		23.2222	15.5626	5.56008
311570	43.976	1.5557	0.2734		23.2254	15.5726	5.56823
311770	43.982	1.5568	0.2739		23.2286	15.5836	5.57841
311970	43.98	1.5577	0.2743		23.2275	15.5926	5.58656
312171	43.982	1.5587	0.2747		23.2286	15.6026	5.5947
312372	43.984	1.5598	0.2751		23.2296	15.6136	5.60285
312572	43.984	1.5608	0.2755		23.2296	15.6236	5.611
312772	43.988	1.5618	0.2759		23.2317	15.6336	5.61914
312972	43.99	1.5628	0.2763		23.2328	15.6436	5.62729
313173	43.986	1.5638	0.2767		23.2307	15.6537	5.63544
313374	43.988	1.5648	0.2771		23.2317	15.6637	5.64358
313574	43.984	1.5658	0.2776		23.2296	15.6737	5.65377
313774	43.986	1.5668	0.278		23.2307	15.6837	5.66191
313974	43.988	1.5678	0.2783		23.2317	15.6937	5.66802
314175	43.992	1.5689	0.2788		23.2338	15.7047	5.67821
314377	43.996	1.5697	0.2791		23.2359	15.7127	5.68432
314578	43.994	1.5708	0.2796		23.2349	15.7237	5.6945
314778	43.998	1.5718	0.28		23.237	15.7337	5.70265
314978	43.994	1.5728	0.2804		23.2349	15.7437	5.71079
315178	43.998	1.5738	0.281		23.237	15.7538	5.72301
315379	43.998	1.5748	0.2813		23.237	15.7638	5.72912
315580	43.992	1.5758	0.2817		23.2338	15.7738	5.73727
315780	43.992	1.5767	0.2821		23.2338	15.7828	5.74542
315980	43.992	1.5778	0.2826		23.2338	15.7938	5.7556
316180	43.99	1.5789	0.283		23.2328	15.8048	5.76375
316381	43.99	1.5797	0.2834		23.2328	15.8128	5.77189
316582	43.99	1.5807	0.2838		23.2328	15.8228	5.78004
316782	43.992	1.5818	0.2842		23.2338	15.8338	5.78819
316982	43.996	1.5828	0.2848		23.2359	15.8438	5.80041
317182	43.996	1.5838	0.2851		23.2359	15.8539	5.80652
317383	44	1.5848	0.2856		23.2381	15.8639	5.8167
317585	44	1.5857	0.286		23.2381	15.8729	5.82485
317786	43.996	1.5868	0.2864		23.2359	15.8839	5.83299
317986	43.998	1.5878	0.2868		23.237	15.8939	5.84114
318186	43.998	1.5888	0.2872		23.237	15.9039	5.84929
318386	43.996	1.5897	0.2877		23.2359	15.9129	5.85947
318587	43.998	1.5908	0.2881		23.237	15.9239	5.86762
318788	44	1.5918	0.2886		23.2381	15.9339	5.8778
318988	43.998	1.5928	0.289		23.237	15.9439	5.88595
319188	44.002	1.5938	0.2894		23.2391	15.954	5.89409
319388	44.004	1.5949	0.2898		23.2402	15.965	5.90224
319589	44.004	1.5957	0.2902		23.2402	15.973	5.91039
319790	44.006	1.5969	0.2907		23.2412	15.985	5.92057
319990	44.008	1.5978	0.2911		23.2423	15.994	5.92872
320190	44.006	1.5988	0.2916		23.2412	16.004	5.9389
320390	44.006	1.5999	0.2919		23.2412	16.015	5.94501
320591	44.006	1.6008	0.2924		23.2412	16.024	5.95519
320793	44.004	1.602	0.2929		23.2402	16.036	5.96538
320994	44.002	1.6028	0.2933		23.2391	16.044	5.97352
321194	44.004	1.6038	0.2937		23.2402	16.0541	5.98167
321394	44.004	1.6048	0.2941		23.2402	16.0641	5.98982
321594	44.002	1.6058	0.2945		23.2391	16.0741	5.99796
321795	44.004	1.6068	0.295		23.2402	16.0841	6.00815
321996	44.004	1.6078	0.2953		23.2402	16.0941	6.01426
322196	44.002	1.6088	0.2959		23.2391	16.1041	6.02648
322396	44.002	1.6099	0.2963		23.2391	16.1151	6.03462
322596	44.002	1.6108	0.2967		23.2391	16.1241	6.04277
322797	44	1.6117	0.2972		23.2381	16.1331	6.05295
322998	44	1.6128	0.2976		23.2381	16.1441	6.0611
323198	44.002	1.6139	0.298		23.2391	16.1552	6.06925
323398	44	1.6148	0.2985		23.2381	16.1642	6.07943
323598	44	1.6159	0.299		23.2381	16.1752	6.08961
323799	43.996	1.6168	0.2994		23.2359	16.1842	6.09776
324000	43.992	1.6179	0.2999		23.2338	16.1952	6.10794
324200	43.992	1.6189	0.3003		23.2338	16.2052	6.11609
324400	43.99	1.6198	0.3008		23.2328	16.2142	6.12627
324600	43.99	1.6208	0.3011		23.2328	16.2242	6.13238
324801	43.992	1.6218	0.3016		23.2338	16.2342	6.14257
325003	43.99	1.6228	0.302		23.2328	16.2442	6.15071
325204	43.986	1.6239	0.3025		23.2307	16.2553	6.1609
325404	43.984	1.6249	0.3029		23.2296	16.2653	6.16904
325604	43.986	1.6259	0.3033		23.2307	16.2753	6.17719
325804	43.984	1.627	0.3038		23.2296	16.2863	6.18737
326005	43.984	1.6279	0.3042		23.2296	16.2953	6.19552
326206	43.978	1.6288	0.3046		23.2264	16.3043	6.20367
326406	43.976	1.6298	0.305		23.2254	16.3143	6.21181
326606	43.976	1.6309	0.3055		23.2254	16.3253	6.222
326806	43.974	1.6319	0.3059		23.2243	16.3353	6.23014
327007	43.972	1.6329	0.3064		23.2233	16.3453	6.24033
327208	43.976	1.6339	0.3068		23.2254	16.3554	6.24847
327408	43.972	1.635	0.3072		23.2233	16.3664	6.25662
327608	43.972	1.6359	0.3076		23.2233	16.3754	6.26477
327808	43.968	1.6369	0.308		23.2212	16.3854	6.27291
328009	43.964	1.638	0.3086		23.219	16.3964	6.28513
328211	43.962	1.6389	0.3089		23.218	16.4054	6.29124
328412	43.96	1.6399	0.3094		23.2169	16.4154	6.30143
328612	43.958	1.641	0.3098		23.2159	16.4264	6.30957
328812	43.954	1.6419	0.3102		23.2138	16.4354	6.31772
329012	43.956	1.6429	0.3106		23.2148	16.4454	6.32587
329213	43.956	1.6438	0.3112		23.2148	16.4545	6.33809
329414	43.954	1.6447	0.3116		23.2138	16.4635	6.34623
329614	43.952	1.646	0.3121		23.2127	16.4765	6.35642
329814	43.948	1.647	0.3125		23.2106	16.4865	6.36456
330014	43.942	1.6479	0.3129		23.2074	16.4955	6.37271
330215	43.936	1.6488	0.3134		23.2043	16.5045	6.38289
330416	43.934	1.6498	0.3138		23.2032	16.5145	6.39104
330616	43.934	1.6508	0.3142		23.2032	16.5245	6.39919
330816	43.926	1.6518	0.3147		23.199	16.5345	6.40937
331016	43.924	1.6528	0.3152		23.1979	16.5445	6.41955
331217	43.924	1.6538	0.3156		23.1979	16.5546	6.4277
331419	43.924	1.6548	0.316		23.1979	16.5646	6.43585
331620	43.924	1.6557	0.3165		23.1979	16.5736	6.44603
331820	43.922	1.6568	0.3169		23.1969	16.5846	6.45418
332020	43.92	1.6578	0.3173		23.1958	16.5946	6.46232
332220	43.922	1.6588	0.3177		23.1969	16.6046	6.47047
332421	43.922	1.6598	0.3182		23.1969	16.6146	6.48065
332622	43.918	1.6608	0.3186		23.1947	16.6246	6.4888
332822	43.922	1.6618	0.3192		23.1969	16.6346	6.50102
333022	43.918	1.6628	0.3196		23.1947	16.6446	6.50916
333222	43.918	1.6639	0.3201		23.1947	16.6557	6.51935
333423	43.916	1.6649	0.3206		23.1937	16.6657	6.52953
333624	43.91	1.666	0.321		23.1905	16.6767	6.53768
333824	43.908	1.6669	0.3215		23.1895	16.6857	6.54786
334024	43.906	1.6678	0.3219		23.1884	16.6947	6.55601
334224	43.904	1.6689	0.3224		23.1874	16.7057	6.56619
334425	43.902	1.6698	0.3229		23.1863	16.7147	6.57637
334627	43.902	1.6709	0.3233		23.1863	16.7257	6.58452
334828	43.896	1.6719	0.3238		23.1831	16.7357	6.5947
335028	43.896	1.6729	0.3242		23.1831	16.7457	6.60285
335228	43.892	1.6737	0.3246		23.181	16.7538	6.611
335428	43.89	1.675	0.3251		23.18	16.7668	6.62118
335629	43.89	1.6759	0.3255		23.18	16.7758	6.62933
335830	43.888	1.677	0.3261		23.1789	16.7868	6.64155
336030	43.88	1.6779	0.3266		23.1747	16.7958	6.65173
336230	43.878	1.6789	0.327		23.1736	16.8058	6.65988
336430	43.876	1.68	0.3275		23.1726	16.8168	6.67006
336631	43.872	1.6809	0.3279		23.1705	16.8258	6.67821
336832	43.872	1.682	0.3284		23.1705	16.8368	6.68839
337032	43.866	1.6829	0.3289		23.1673	16.8458	6.69857
337232	43.862	1.6839	0.3293		23.1652	16.8559	6.70672
337432	43.858	1.6849	0.3298		23.1631	16.8659	6.7169
337633	43.858	1.686	0.3303		23.1631	16.8769	6.72709
337835	43.856	1.6869	0.3307		23.162	16.8859	6.73523
338036	43.854	1.6879	0.3312		23.1609	16.8959	6.74542
338236	43.85	1.6889	0.3317		23.1588	16.9059	6.7556
338436	43.846	1.69	0.3321		23.1567	16.9169	6.76375
338636	43.842	1.6909	0.3327		23.1546	16.9259	6.77597
338837	43.838	1.6919	0.3331		23.1525	16.9359	6.78411
339038	43.838	1.6929	0.3336		23.1525	16.9459	6.7943
339238	43.836	1.6939	0.3341		23.1514	16.956	6.80448
339438	43.832	1.6948	0.3345		23.1493	16.965	6.81263
339638	43.828	1.696	0.335		23.1472	16.977	6.82281
339839	43.824	1.6968	0.3355		23.1451	16.985	6.83299
340040	43.824	1.6979	0.336		23.1451	16.996	6.84318
340240	43.82	1.6989	0.3364		23.143	17.006	6.85132
340440	43.818	1.7	0.3369		23.1419	17.017	6.86151
340640	43.812	1.7009	0.3374		23.1388	17.026	6.87169
340841	43.81	1.7018	0.3379		23.1377	17.035	6.88187
341043	43.808	1.7029	0.3384		23.1367	17.046	6.89206
341244	43.808	1.704	0.3388		23.1367	17.0571	6.9002
341444	43.802	1.7049	0.3393		23.1335	17.0661	6.91039
341644	43.798	1.7059	0.3398		23.1314	17.0761	6.92057
341844	43.794	1.7069	0.3404		23.1293	17.0861	6.93279
342045	43.778	1.708	0.3408		23.1208	17.0971	6.94094
342246	43.772	1.709	0.3412		23.1176	17.1071	6.94908
342446	43.762	1.71	0.3418		23.1124	17.1171	6.9613
342646	43.758	1.711	0.3422		23.1102	17.1271	6.96945
342846	43.752	1.712	0.3427		23.1071	17.1371	6.97963
343047	43.746	1.7132	0.3432		23.1039	17.1491	6.98982
343248	43.736	1.7142	0.3436		23.0986	17.1592	6.99796
343448	43.726	1.7151	0.3442		23.0933	17.1682	7.01018
343648	43.718	1.716	0.3446		23.0891	17.1772	7.01833
343848	43.71	1.717	0.3451		23.0849	17.1872	7.02851
344049	43.704	1.718	0.3456		23.0817	17.1972	7.0387
344250	43.7	1.719	0.3461		23.0796	17.2072	7.04888
344450	43.698	1.72	0.3465		23.0786	17.2172	7.05703
344650	43.688	1.7211	0.347		23.0733	17.2282	7.06721
344850	43.688	1.7221	0.3475		23.0733	17.2382	7.07739
345051	43.682	1.723	0.348		23.0701	17.2472	7.08758
345253	43.682	1.7239	0.3485		23.0701	17.2563	7.09776
345454	43.678	1.7251	0.349		23.068	17.2683	7.10794
345654	43.67	1.7261	0.3496		23.0638	17.2783	7.12016
345854	43.668	1.7271	0.3499		23.0627	17.2883	7.12627
346054	43.666	1.728	0.3505		23.0617	17.2973	7.13849
346255	43.66	1.7291	0.3509		23.0585	17.3083	7.14664
346456	43.66	1.73	0.3514		23.0585	17.3173	7.15682
346656	43.652	1.731	0.352		23.0543	17.3273	7.16904
346856	43.648	1.732	0.3524		23.0522	17.3373	7.17719
347056	43.642	1.733	0.353		23.049	17.3473	7.18941
347257	43.642	1.7341	0.3534		23.049	17.3584	7.19756
347458	43.636	1.7351	0.354		23.0458	17.3684	7.20978
347658	43.628	1.7359	0.3545		23.0416	17.3764	7.21996
347858	43.626	1.737	0.355		23.0405	17.3874	7.23014
348058	43.624	1.7382	0.3555		23.0395	17.3994	7.24033
348259	43.616	1.7391	0.356		23.0353	17.4084	7.25051
348461	43.614	1.74	0.3564		23.0342	17.4174	7.25866
348662	43.608	1.7411	0.357		23.031	17.4284	7.27088
348862	43.598	1.7421	0.3575		23.0257	17.4384	7.28106
349062	43.596	1.7431	0.3581		23.0247	17.4484	7.29328
349262	43.59	1.7442	0.3586		23.0215	17.4595	7.30346
349463	43.588	1.7451	0.3591		23.0205	17.4685	7.31365
349664	43.582	1.7461	0.3596		23.0173	17.4785	7.32383
349864	43.578	1.7471	0.3601		23.0152	17.4885	7.33401
350064	43.572	1.748	0.3606		23.012	17.4975	7.3442
350264	43.568	1.7491	0.3612		23.0099	17.5085	7.35642
350465	43.562	1.7501	0.3617		23.0067	17.5185	7.3666
350666	43.556	1.7511	0.3621		23.0036	17.5285	7.37475
350866	43.556	1.7522	0.3627		23.0036	17.5395	7.38697
351066	43.548	1.753	0.3631		22.9993	17.5475	7.39511
351266	43.54	1.7541	0.3637		22.9951	17.5586	7.40733
351467	43.532	1.7551	0.3642		22.9909	17.5686	7.41752
351669	43.53	1.7562	0.3647		22.9898	17.5796	7.4277
351870	43.526	1.7571	0.3652		22.9877	17.5886	7.43788
352070	43.518	1.7581	0.3656		22.9835	17.5986	7.44603
352270	43.516	1.7591	0.3661		22.9824	17.6086	7.45621
352470	43.514	1.76	0.3667		22.9814	17.6176	7.46843
352671	43.506	1.761	0.3671		22.9772	17.6276	7.47658
352872	43.502	1.7622	0.3677		22.975	17.6396	7.4888
353072	43.494	1.7632	0.3684		22.9708	17.6496	7.50305
353272	43.492	1.7642	0.3688		22.9698	17.6597	7.5112
353472	43.482	1.7651	0.3693		22.9645	17.6687	7.52138
353673	43.476	1.7662	0.3697		22.9613	17.6797	7.52953
353874	43.47	1.7672	0.3702		22.9581	17.6897	7.53971
354074	43.462	1.7682	0.3708		22.9539	17.6997	7.55193
354274	43.458	1.7692	0.3713		22.9518	17.7097	7.56212
354474	43.452	1.7702	0.3718		22.9486	17.7197	7.5723
354675	43.444	1.7712	0.3724		22.9444	17.7297	7.58452
354877	43.438	1.7722	0.3729		22.9412	17.7397	7.5947
355078	43.432	1.7731	0.3734		22.9381	17.7487	7.60489
355278	43.428	1.7742	0.3738		22.936	17.7598	7.61303
355478	43.428	1.7752	0.3744		22.936	17.7698	7.62525
355678	43.418	1.7763	0.375		22.9307	17.7808	7.63747
355879	43.402	1.7774	0.3755		22.9222	17.7918	7.64766
356080	43.388	1.7783	0.376		22.9148	17.8008	7.65784
356280	43.376	1.7793	0.3765		22.9085	17.8108	7.66802
356480	43.366	1.7802	0.3771		22.9032	17.8198	7.68024
356680	43.354	1.7814	0.3776		22.8969	17.8318	7.69043
356881	43.342	1.7824	0.3781		22.8905	17.8418	7.70061
357082	43.326	1.7832	0.3785		22.8821	17.8498	7.70876
357282	43.31	1.7843	0.379		22.8736	17.8609	7.71894
357482	43.282	1.7852	0.3796		22.8589	17.8699	7.73116
357682	43.266	1.7862	0.3801		22.8504	17.8799	7.74134
357883	43.252	1.7871	0.3806		22.843	17.8889	7.75153
358085	43.236	1.7881	0.3811		22.8346	17.8989	7.76171
358286	43.228	1.7892	0.3816		22.8303	17.9099	7.77189
358486	43.218	1.7901	0.382		22.8251	17.9189	7.78004
358686	43.21	1.7912	0.3827		22.8208	17.9299	7.7943
358886	43.206	1.7923	0.3832		22.8187	17.9409	7.80448
359087	43.194	1.7931	0.3838		22.8124	17.9489	7.8167
359288	43.184	1.7941	0.3843		22.8071	17.959	7.82688
359488	43.178	1.7952	0.3849		22.8039	17.97	7.8391
359688	43.17	1.7961	0.3854		22.7997	17.979	7.84929
359888	43.162	1.7972	0.3859		22.7955	17.99	7.85947
360089	43.152	1.7982	0.3865		22.7902	18	7.87169
360290	43.15	1.7991	0.387		22.7891	18.009	7.88187
360490	43.144	1.8001	0.3876		22.786	18.019	7.89409
360690	43.136	1.8011	0.3881		22.7817	18.029	7.90428
360890	43.136	1.8022	0.3885		22.7817	18.04	7.91242
361091	43.13	1.8031	0.3891		22.7786	18.049	7.92464
361293	43.122	1.8044	0.3897		22.7744	18.0621	7.93686
361494	43.11	1.8053	0.3902		22.768	18.0711	7.94705
361694	43.104	1.8063	0.3907		22.7648	18.0811	7.95723
361894	43.094	1.8072	0.3913		22.7596	18.0901	7.96945
362094	43.088	1.8083	0.3918		22.7564	18.1011	7.97963
362295	43.08	1.8092	0.3924		22.7522	18.1101	7.99185
362496	43.074	1.8102	0.3929		22.749	18.1201	8.00204
362696	43.066	1.8112	0.3934		22.7448	18.1301	8.01222
362896	43.06	1.8123	0.394		22.7416	18.1411	8.02444
363096	43.05	1.8132	0.3944		22.7363	18.1502	8.03259
363297	43.042	1.8143	0.395		22.7321	18.1612	8.04481
363498	43.036	1.8153	0.3956		22.7289	18.1712	8.05703
363698	43.022	1.8163	0.3961		22.7215	18.1812	8.06721
363898	43.012	1.8172	0.3966		22.7163	18.1902	8.07739
364098	43.002	1.8183	0.3972		22.711	18.2012	8.08961
364299	42.994	1.8193	0.3977		22.7068	18.2112	8.0998
364500	42.984	1.8202	0.3983		22.7015	18.2202	8.11202
364700	42.972	1.8212	0.3988		22.6951	18.2302	8.1222
364900	42.968	1.8223	0.3993		22.693	18.2412	8.13238
365100	42.958	1.8232	0.3999		22.6877	18.2503	8.1446
365301	42.954	1.8242	0.4005		22.6856	18.2603	8.15682
365503	42.944	1.8253	0.401		22.6803	18.2713	8.16701
365704	42.934	1.8263	0.4016		22.6751	18.2813	8.17923
365904	42.926	1.8273	0.4021		22.6708	18.2913	8.18941
366104	42.918	1.8284	0.4027		22.6666	18.3023	8.20163
366304	42.916	1.8294	0.4032		22.6656	18.3123	8.21181
366505	42.904	1.8303	0.4037		22.6592	18.3213	8.222
366706	42.896	1.8313	0.4042		22.655	18.3313	8.23218
366906	42.886	1.8324	0.4049		22.6497	18.3423	8.24644
367106	42.876	1.8333	0.4054		22.6444	18.3514	8.25662
367306	42.866	1.8343	0.4059		22.6391	18.3614	8.2668
367507	42.858	1.8353	0.4064		22.6349	18.3714	8.27699
367708	42.852	1.8363	0.407		22.6318	18.3814	8.28921
367908	42.846	1.8374	0.4076		22.6286	18.3924	8.30143
368108	42.836	1.8383	0.4082		22.6233	18.4014	8.31365
368308	42.826	1.8393	0.4086		22.618	18.4114	8.32179
368509	42.816	1.8403	0.4092		22.6127	18.4214	8.33401
368711	42.806	1.8414	0.4098		22.6075	18.4324	8.34623
368912	42.794	1.8423	0.4103		22.6011	18.4414	8.35642
369112	42.786	1.8434	0.4108		22.5969	18.4525	8.3666
369312	42.776	1.8444	0.4114		22.5916	18.4625	8.37882
369512	42.768	1.8454	0.4119		22.5874	18.4725	8.389
369713	42.754	1.8464	0.4126		22.58	18.4825	8.40326
369914	42.746	1.8473	0.413		22.5758	18.4915	8.41141
370114	42.73	1.8485	0.4135		22.5673	18.5035	8.42159
370314	42.71	1.8495	0.414		22.5568	18.5135	8.43177
370514	42.692	1.8504	0.4146		22.5473	18.5225	8.44399
370715	42.67	1.8515	0.4152		22.5356	18.5335	8.45621
370916	42.656	1.8524	0.4158		22.5282	18.5425	8.46843
371116	42.638	1.8534	0.4163		22.5187	18.5526	8.47862
371316	42.626	1.8544	0.4169		22.5124	18.5626	8.49084
371516	42.612	1.8554	0.4175		22.505	18.5726	8.50305
371717	42.602	1.8564	0.4181		22.4997	18.5826	8.51527
371919	42.588	1.8574	0.4186		22.4923	18.5926	8.52546
372120	42.578	1.8585	0.4192		22.487	18.6036	8.53768
372320	42.57	1.8594	0.4197		22.4828	18.6126	8.54786
372520	42.558	1.8606	0.4202		22.4765	18.6246	8.55804
372720	42.55	1.8614	0.4209		22.4723	18.6326	8.5723
372921	42.538	1.8625	0.4214		22.4659	18.6436	8.58248
373122	42.528	1.8633	0.4219		22.4606	18.6517	8.59267
373322	42.522	1.8644	0.4225		22.4575	18.6627	8.60489
373522	42.508	1.8654	0.4231		22.4501	18.6727	8.61711
373722	42.494	1.8666	0.4236		22.4427	18.6847	8.62729
373923	42.476	1.8674	0.4242		22.4332	18.6927	8.63951
374124	42.468	1.8684	0.4248		22.429	18.7027	8.65173
374324	42.458	1.8694	0.4254		22.4237	18.7127	8.66395
374524	42.45	1.8704	0.426		22.4194	18.7227	8.67617
374724	42.442	1.8714	0.4265		22.4152	18.7327	8.68635
374925	42.434	1.8723	0.4271		22.411	18.7417	8.69857
375127	42.426	1.8734	0.4277		22.4068	18.7528	8.71079
375328	42.414	1.8743	0.4283		22.4004	18.7618	8.72301
375528	42.414	1.8755	0.4288		22.4004	18.7738	8.7332
375728	42.406	1.8763	0.4294		22.3962	18.7818	8.74542
375928	42.4	1.8774	0.43		22.393	18.7928	8.75764
376129	42.394	1.8784	0.4305		22.3899	18.8028	8.76782
376330	42.386	1.8794	0.4311		22.3856	18.8128	8.78004
376530	42.378	1.8804	0.4316		22.3814	18.8228	8.79022
376730	42.372	1.8813	0.4323		22.3782	18.8318	8.80448
376930	42.362	1.8825	0.4327		22.373	18.8438	8.81263
377131	42.352	1.8835	0.4333		22.3677	18.8539	8.82485
377332	42.344	1.8844	0.4339		22.3635	18.8629	8.83707
377532	42.334	1.8855	0.4345		22.3582	18.8739	8.84929
377732	42.33	1.8864	0.435		22.3561	18.8829	8.85947
377932	42.318	1.8875	0.4356		22.3497	18.8939	8.87169
378133	42.312	1.8884	0.4361		22.3466	18.9029	8.88187
378335	42.3	1.8894	0.4367		22.3402	18.9129	8.89409
378536	42.294	1.8904	0.4374		22.3371	18.9229	8.90835
378736	42.284	1.8914	0.4379		22.3318	18.9329	8.91853
378936	42.282	1.8924	0.4385		22.3307	18.9429	8.93075
379136	42.274	1.8934	0.4391		22.3265	18.953	8.94297
379337	42.268	1.8945	0.4397		22.3233	18.964	8.95519
379538	42.256	1.8955	0.4403		22.317	18.974	8.96741
379738	42.25	1.8966	0.4409		22.3138	18.985	8.97963
379938	42.238	1.8974	0.4414		22.3075	18.993	8.98982
380138	42.228	1.8986	0.4421		22.3022	19.005	9.00407
380339	42.222	1.8994	0.4427		22.299	19.013	9.01629
380540	42.214	1.9004	0.4433		22.2948	19.023	9.02851
380740	42.206	1.9014	0.4438		22.2906	19.033	9.0387
380940	42.198	1.9022	0.4445		22.2864	19.041	9.05295
381140	42.19	1.9034	0.445		22.2821	19.0531	9.06314
381341	42.186	1.9046	0.4456		22.28	19.0651	9.07536
381543	42.176	1.9056	0.4463		22.2747	19.0751	9.08961
381744	42.166	1.9064	0.4469		22.2695	19.0831	9.10183
381944	42.156	1.9074	0.4475		22.2642	19.0931	9.11405
382144	42.146	1.9084	0.448		22.2589	19.1031	9.12424
382344	42.138	1.9094	0.4486		22.2547	19.1131	9.13646
382545	42.126	1.9106	0.4492		22.2483	19.1251	9.14868
382746	42.12	1.9116	0.4498		22.2452	19.1351	9.1609
382946	42.112	1.9125	0.4503		22.2409	19.1441	9.17108
383146	42.104	1.9134	0.451		22.2367	19.1532	9.18534
383346	42.098	1.9146	0.4515		22.2335	19.1652	9.19552
383547	42.088	1.9155	0.4522		22.2283	19.1742	9.20978
383748	42.078	1.9166	0.4527		22.223	19.1852	9.21996
383948	42.07	1.9175	0.4533		22.2188	19.1942	9.23218
384148	42.06	1.9185	0.4539		22.2135	19.2042	9.2444
384348	42.05	1.9195	0.4544		22.2082	19.2142	9.25458
384549	42.04	1.9206	0.455		22.2029	19.2252	9.2668
384750	42.032	1.9216	0.4556		22.1987	19.2352	9.27902
384950	42.022	1.9225	0.4561		22.1934	19.2442	9.28921
385150	42.016	1.9235	0.4568		22.1902	19.2543	9.30346
385350	42.004	1.9245	0.4573		22.1839	19.2643	9.31365
385551	41.998	1.9256	0.458		22.1807	19.2753	9.3279
385753	41.992	1.9265	0.4586		22.1776	19.2843	9.34012
385954	41.98	1.9275	0.4592		22.1712	19.2943	9.35234
386154	41.974	1.9285	0.4598		22.1681	19.3043	9.36456
386354	41.966	1.9295	0.4604		22.1638	19.3143	9.37678
386554	41.96	1.9306	0.461		22.1607	19.3253	9.389
386755	41.95	1.9316	0.4616		22.1554	19.3353	9.40122
386956	41.94	1.9326	0.4622		22.1501	19.3453	9.41344
387156	41.928	1.9335	0.4628		22.1438	19.3544	9.42566
387356	41.918	1.9346	0.4634		22.1385	19.3654	9.43788
387556	41.91	1.9356	0.464		22.1342	19.3754	9.4501
387757	41.898	1.9366	0.4646		22.1279	19.3854	9.46232
387958	41.888	1.9375	0.4652		22.1226	19.3944	9.47454
388158	41.876	1.9385	0.4658		22.1163	19.4044	9.48676
388358	41.87	1.9397	0.4664		22.1131	19.4164	9.49898
388558	41.856	1.9407	0.467		22.1057	19.4264	9.5112
388759	41.84	1.9416	0.4676		22.0973	19.4354	9.52342
388961	41.826	1.9427	0.4682		22.0899	19.4464	9.53564
389162	41.788	1.9435	0.4688		22.0698	19.4545	9.54786
389362	41.742	1.9445	0.4694		22.0455	19.4645	9.56008
389562	41.698	1.9453	0.47		22.0223	19.4725	9.5723
389762	41.67	1.9463	0.4706		22.0075	19.4825	9.58452
389963	41.652	1.9475	0.4713		21.998	19.4945	9.59878
390164	41.632	1.9486	0.472		21.9874	19.5055	9.61303
390364	41.612	1.9496	0.4727		21.9769	19.5155	9.62729
390564	41.594	1.9505	0.4735		21.9674	19.5245	9.64358
390764	41.572	1.9515	0.4742		21.9557	19.5345	9.65784
390965	41.548	1.9526	0.4749		21.9431	19.5455	9.6721
391166	41.52	1.9536	0.4756		21.9283	19.5556	9.68635
391366	41.498	1.9546	0.4764		21.9167	19.5656	9.70265
391566	41.468	1.9556	0.4772		21.9008	19.5756	9.71894
391766	41.432	1.9567	0.4782		21.8818	19.5866	9.73931
391967	41.406	1.9577	0.4792		21.8681	19.5966	9.75967
392169	41.376	1.9587	0.4801		21.8522	19.6066	9.778
392370	41.344	1.9598	0.4809		21.8353	19.6176	9.7943
392570	41.314	1.9608	0.4815		21.8195	19.6276	9.80652
392770	41.288	1.9617	0.4823		21.8057	19.6366	9.82281
392970	41.262	1.9627	0.483		21.792	19.6466	9.83707
393171	41.238	1.9638	0.4839		21.7793	19.6577	9.8554
393372	41.21	1.9649	0.4847		21.7646	19.6687	9.87169
393572	41.186	1.9658	0.4857		21.7519	19.6777	9.89206
393772	41.16	1.9668	0.4867		21.7381	19.6877	9.91242
393972	41.134	1.9677	0.4876		21.7244	19.6967	9.93075
394173	41.11	1.9688	0.4884		21.7117	19.7077	9.94705
394374	41.092	1.9697	0.4892		21.7022	19.7167	9.96334
394574	41.074	1.9706	0.49		21.6927	19.7257	9.97963
394774	41.06	1.9717	0.4908		21.6853	19.7367	9.99593
394974	41.04	1.9727	0.4915		21.6748	19.7467	10.0102
395175	41.024	1.9738	0.4923		21.6663	19.7578	10.0265
395377	41.01	1.9747	0.493		21.6589	19.7668	10.0407
395578	40.996	1.9758	0.4936		21.6515	19.7778	10.053
395778	40.984	1.9767	0.4943		21.6452	19.7868	10.0672
395978	40.97	1.9777	0.4949		21.6378	19.7968	10.0794
396178	40.958	1.9786	0.4957		21.6315	19.8058	10.0957
396379	40.946	1.9797	0.4963		21.6251	19.8168	10.1079
396580	40.934	1.9807	0.497		21.6188	19.8268	10.1222
396780	40.92	1.9817	0.4977		21.6114	19.8368	10.1365
396980	40.912	1.9828	0.4984		21.6072	19.8478	10.1507
397180	40.896	1.9839	0.4991		21.5987	19.8589	10.165
397381	40.876	1.985	0.4998		21.5882	19.8699	10.1792
397582	40.864	1.9858	0.5003		21.5818	19.8779	10.1894
397782	40.848	1.9867	0.5009		21.5734	19.8869	10.2016
397982	40.834	1.9878	0.5017		21.566	19.8979	10.2179
398182	40.82	1.9888	0.5023		21.5586	19.9079	10.2301
398383	40.808	1.9898	0.5029		21.5522	19.9179	10.2424
398585	40.792	1.9907	0.5035		21.5438	19.9269	10.2546
398786	40.782	1.9919	0.5042		21.5385	19.9389	10.2688
398986	40.768	1.9928	0.5049		21.5311	19.9479	10.2831
399186	40.758	1.9938	0.5055		21.5258	19.958	10.2953
399386	40.742	1.9947	0.5061		21.5174	19.967	10.3075
399587	40.732	1.9959	0.5068		21.5121	19.979	10.3218
[truncated: 195 more rows]
